# Supplementary material
Source: publisher figshare collection journal article supplement (https://gsajournals.figshare.com/articles/dataset/_/7237562)

# Angle Rate T0

deg/225s

+ \*  $p < 0.05$   
 ++ \*\*  $p < 0.01$   
 +++ \*\*\*  $p < 0.001$

Data filtering:  $\geq 4$  roots/IL

Bars = std. err. (sigma) from lm/glht

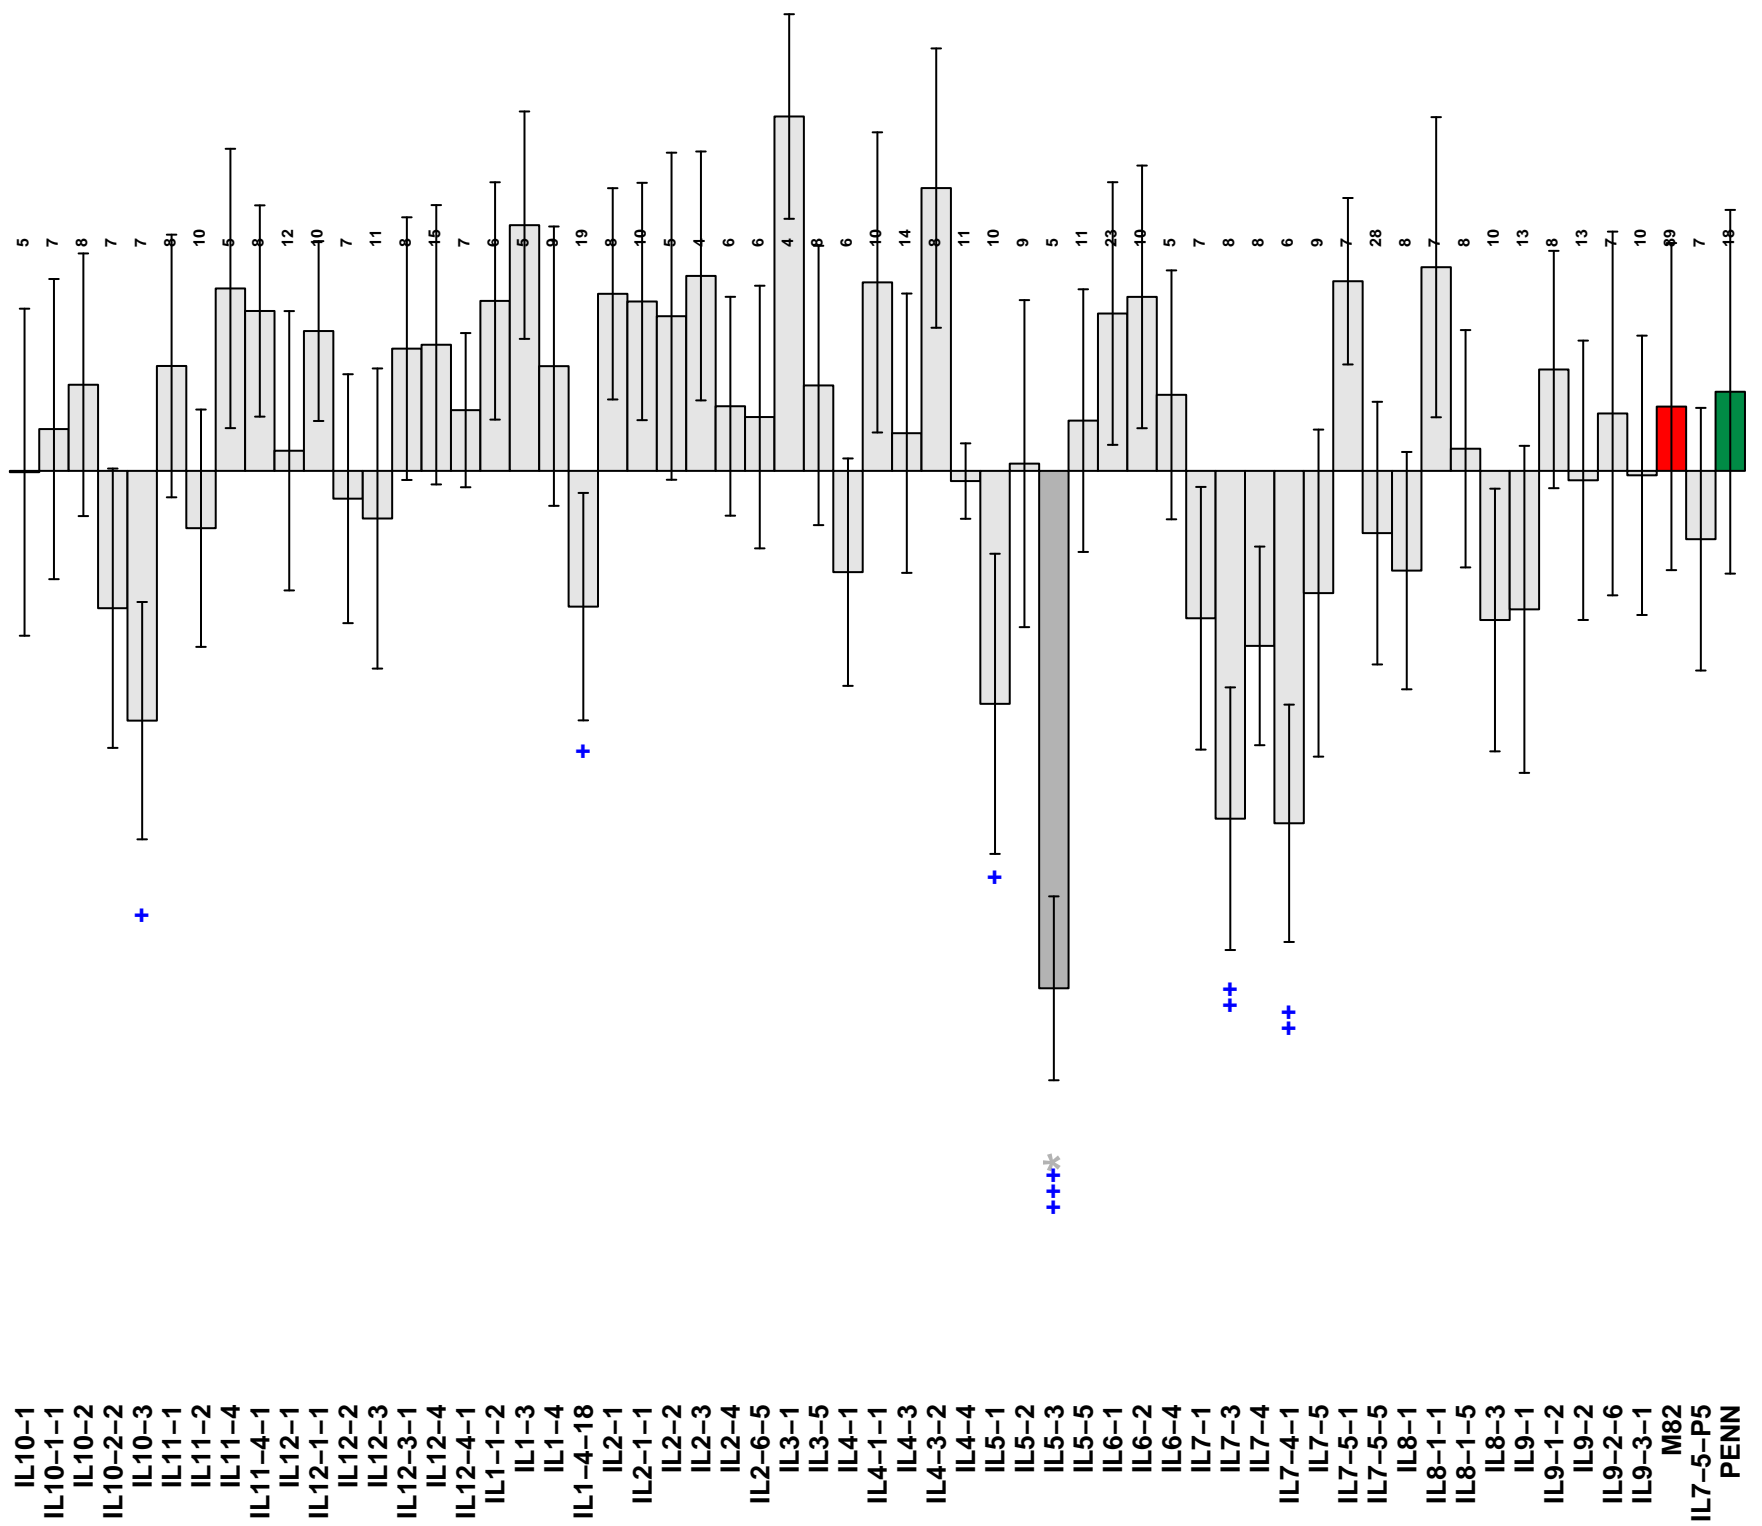

# Angle Rate T1

deg/225s

+ \*  $p < 0.05$   
 ++ \*\*  $p < 0.01$   
 +++ \*\*\*  $p < 0.001$

Data filtering:  $\geq 4$  roots/IL

Bars = std. err. (sigma) from lm/glht

-2 -1 0 1 2 3

IL10-1  
 IL10-1-1  
 IL10-2  
 IL10-2-2  
 IL10-3  
 IL11-1  
 IL11-2  
 IL11-4  
 IL11-4-1  
 IL12-1  
 IL12-1-1  
 IL12-2  
 IL12-3  
 IL12-3-1  
 IL12-4  
 IL12-4-1  
 IL1-1-2  
 IL1-3  
 IL1-4  
 IL1-4-18  
 IL2-1  
 IL2-1-1  
 IL2-2  
 IL2-3  
 IL2-4  
 IL2-6-5  
 IL3-1  
 IL3-5  
 IL4-1  
 IL4-1-1  
 IL4-3  
 IL4-3-2  
 IL4-4  
 IL5-1  
 IL5-2  
 IL5-3  
 IL5-5  
 IL6-1  
 IL6-2  
 IL6-4  
 IL7-1  
 IL7-3  
 IL7-4  
 IL7-4-1  
 IL7-5  
 IL7-5-1  
 IL7-5-5  
 IL8-1  
 IL8-1-1  
 IL8-1-5  
 IL8-3  
 IL9-1  
 IL9-1-2  
 IL9-2  
 IL9-2-6  
 IL9-3-1  
 M82  
 IL7-5-P5  
 PENN

Angle Rate T2

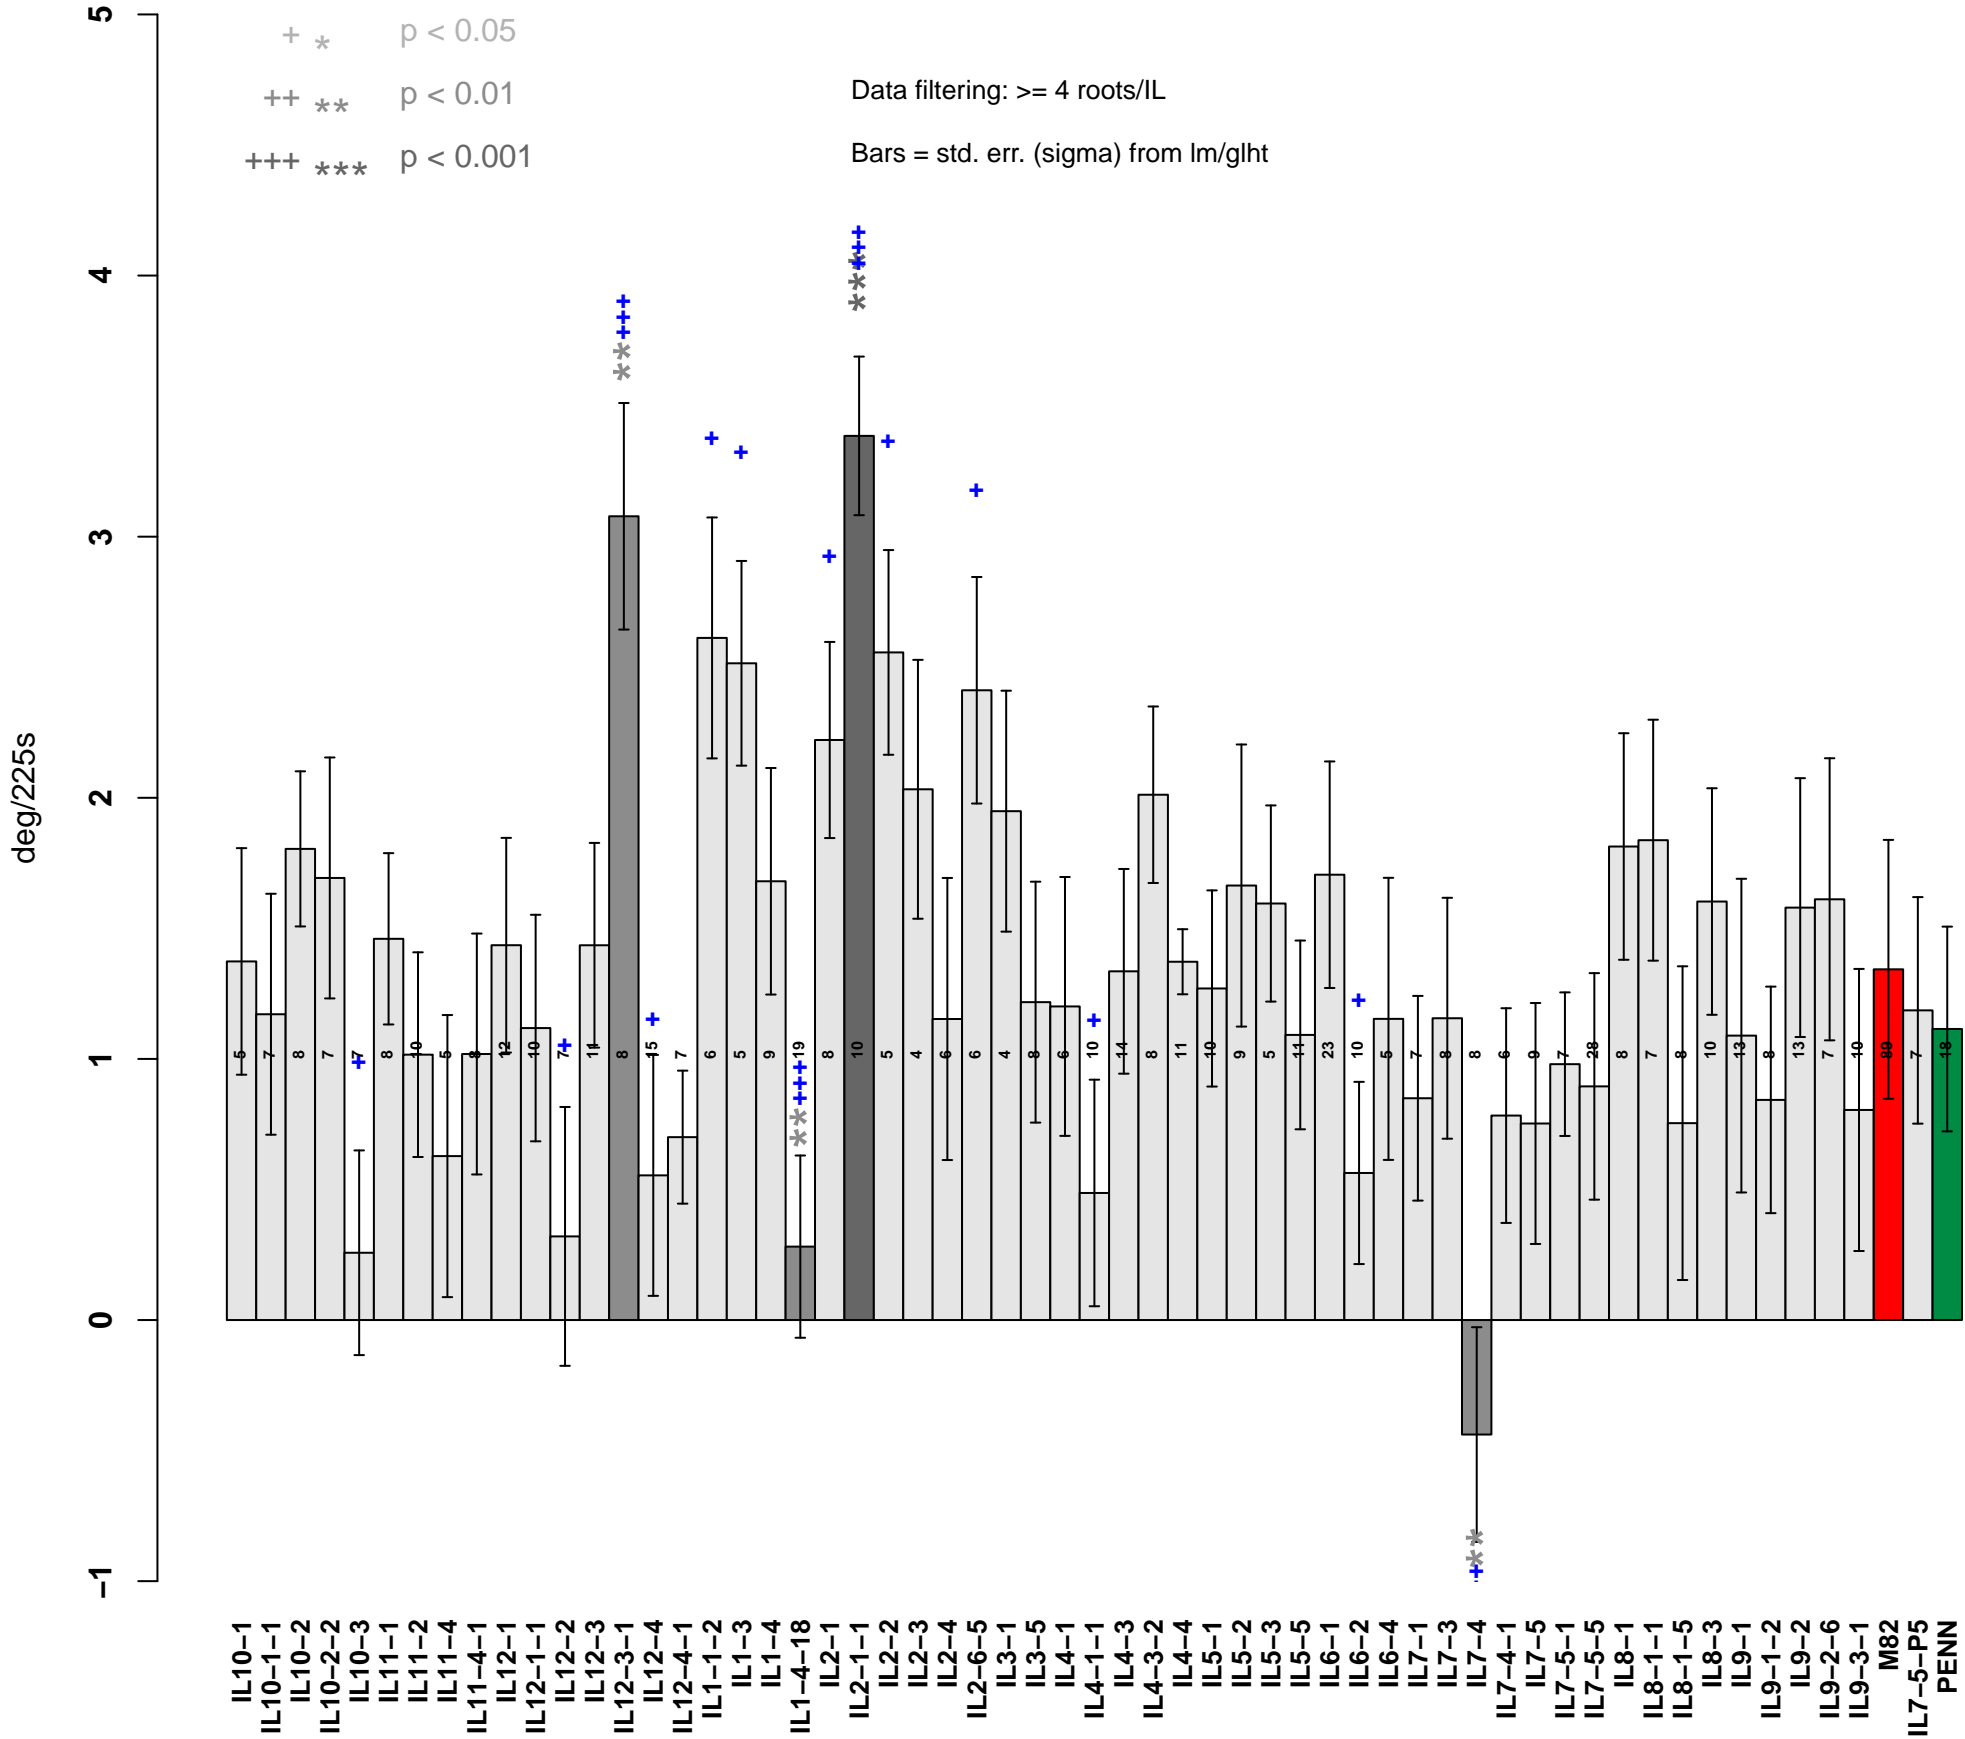

# Angle Rate T3

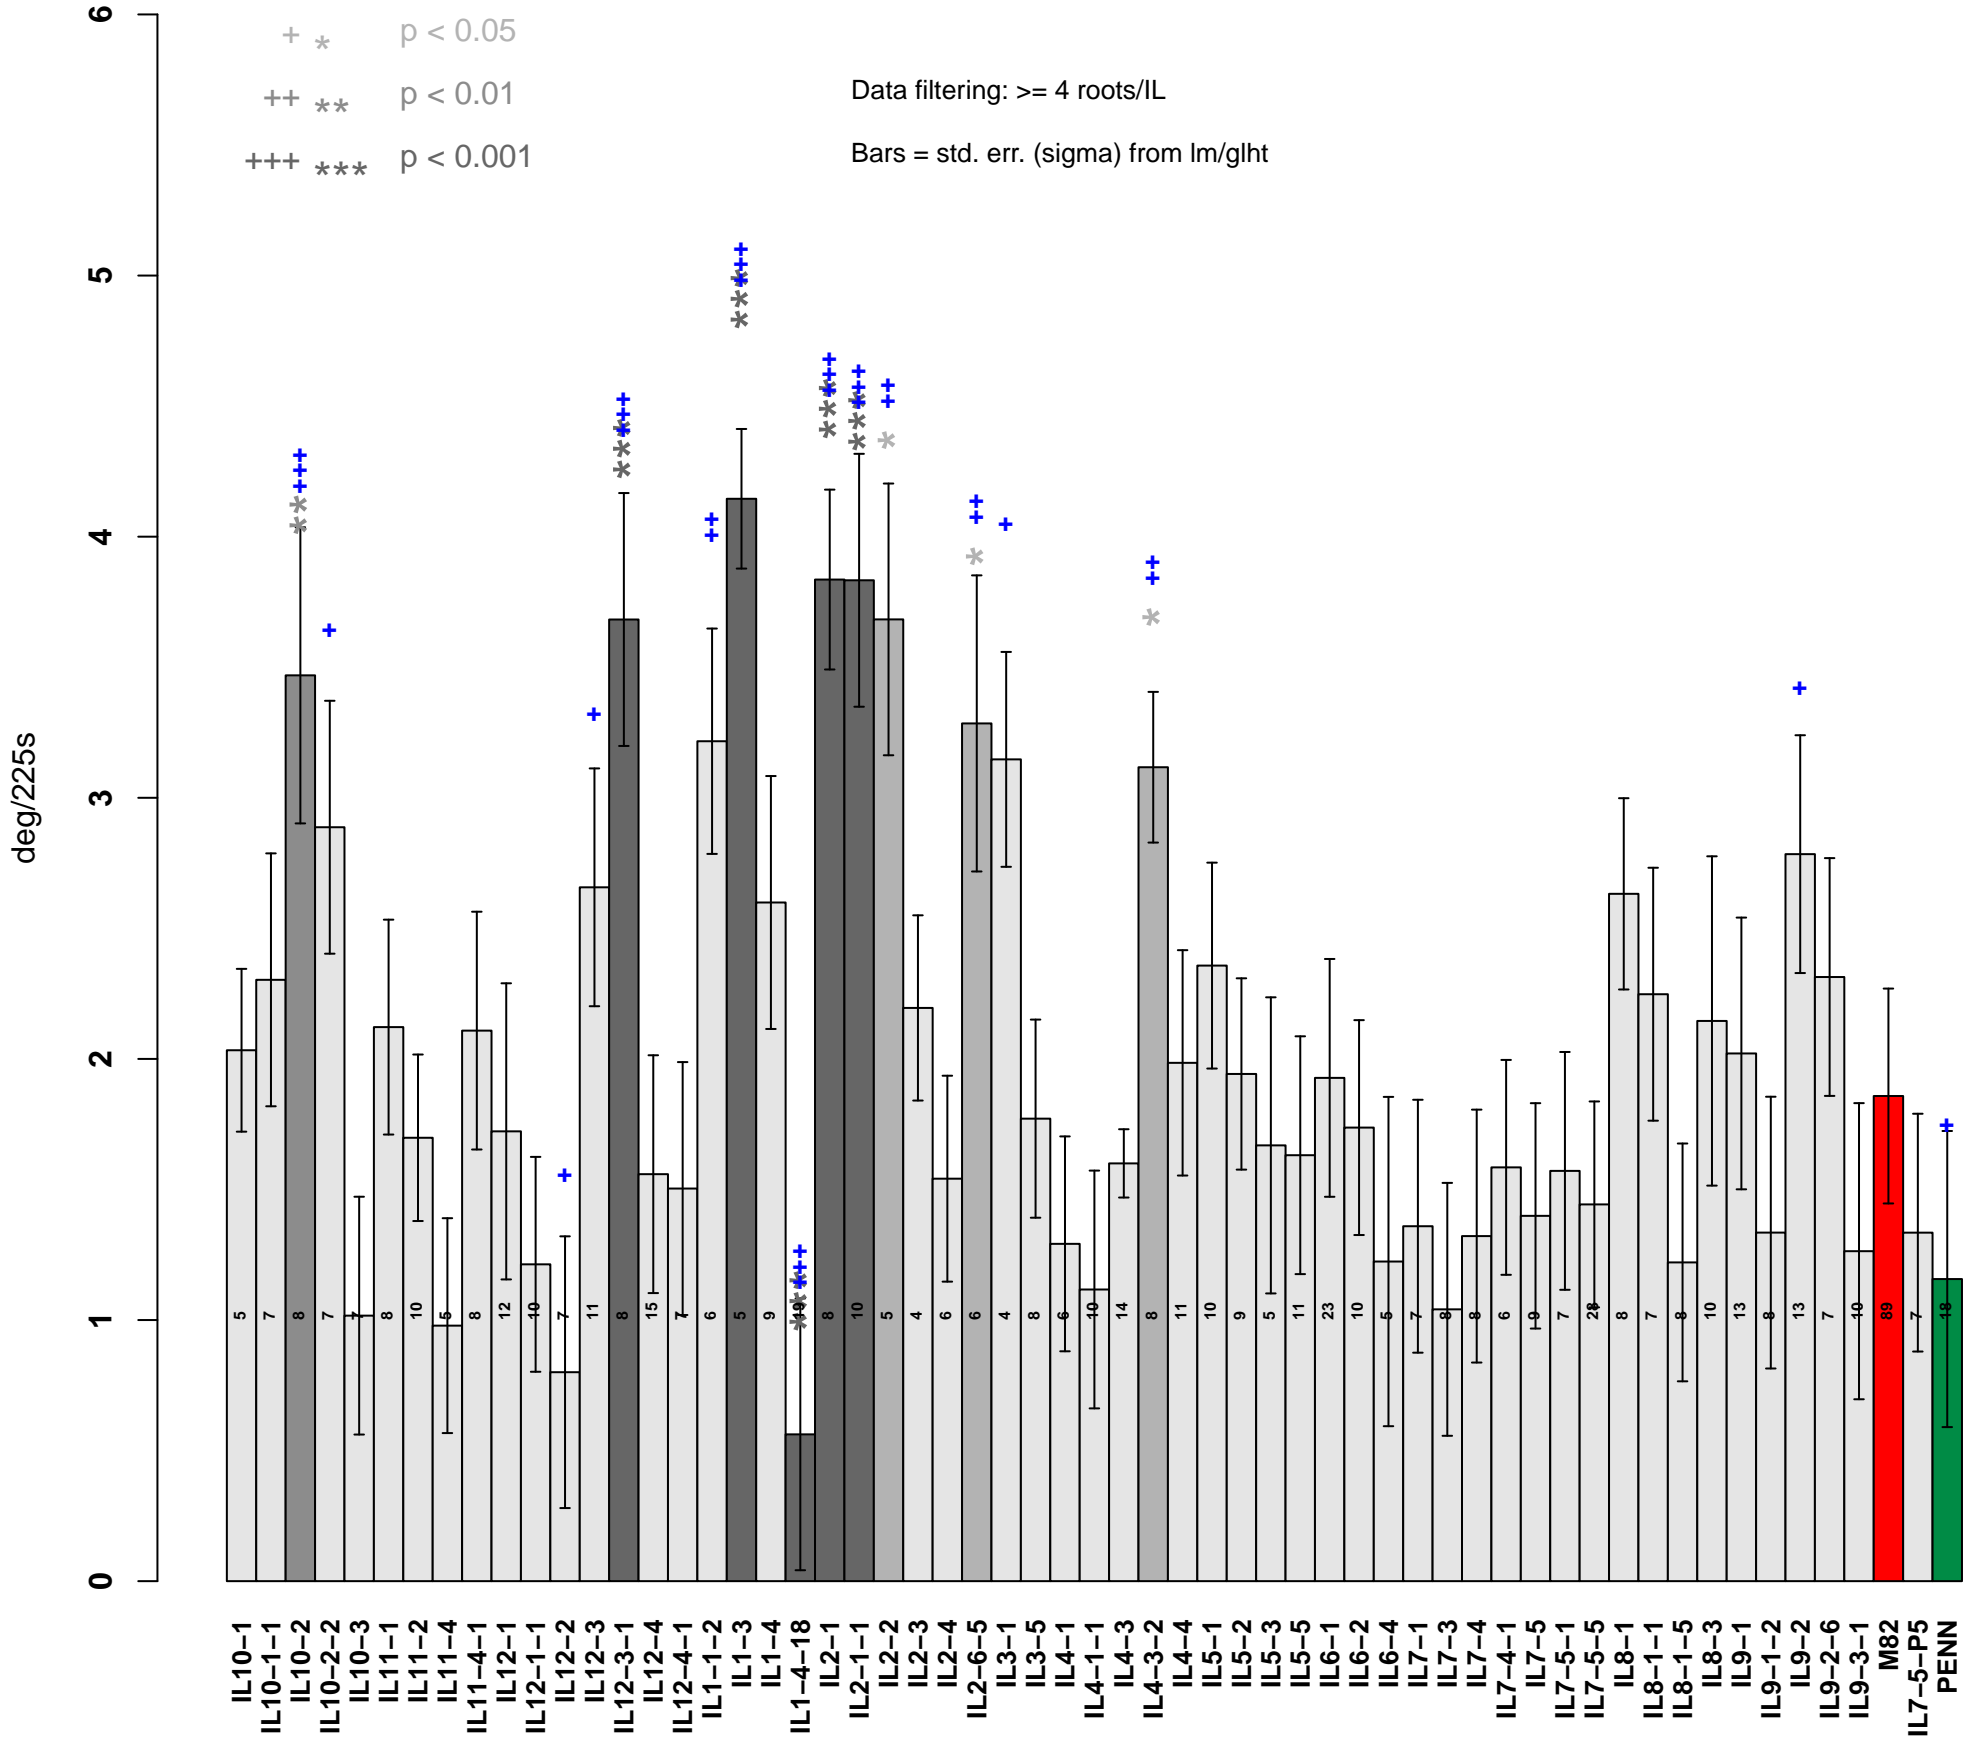

# Angle Rate T4

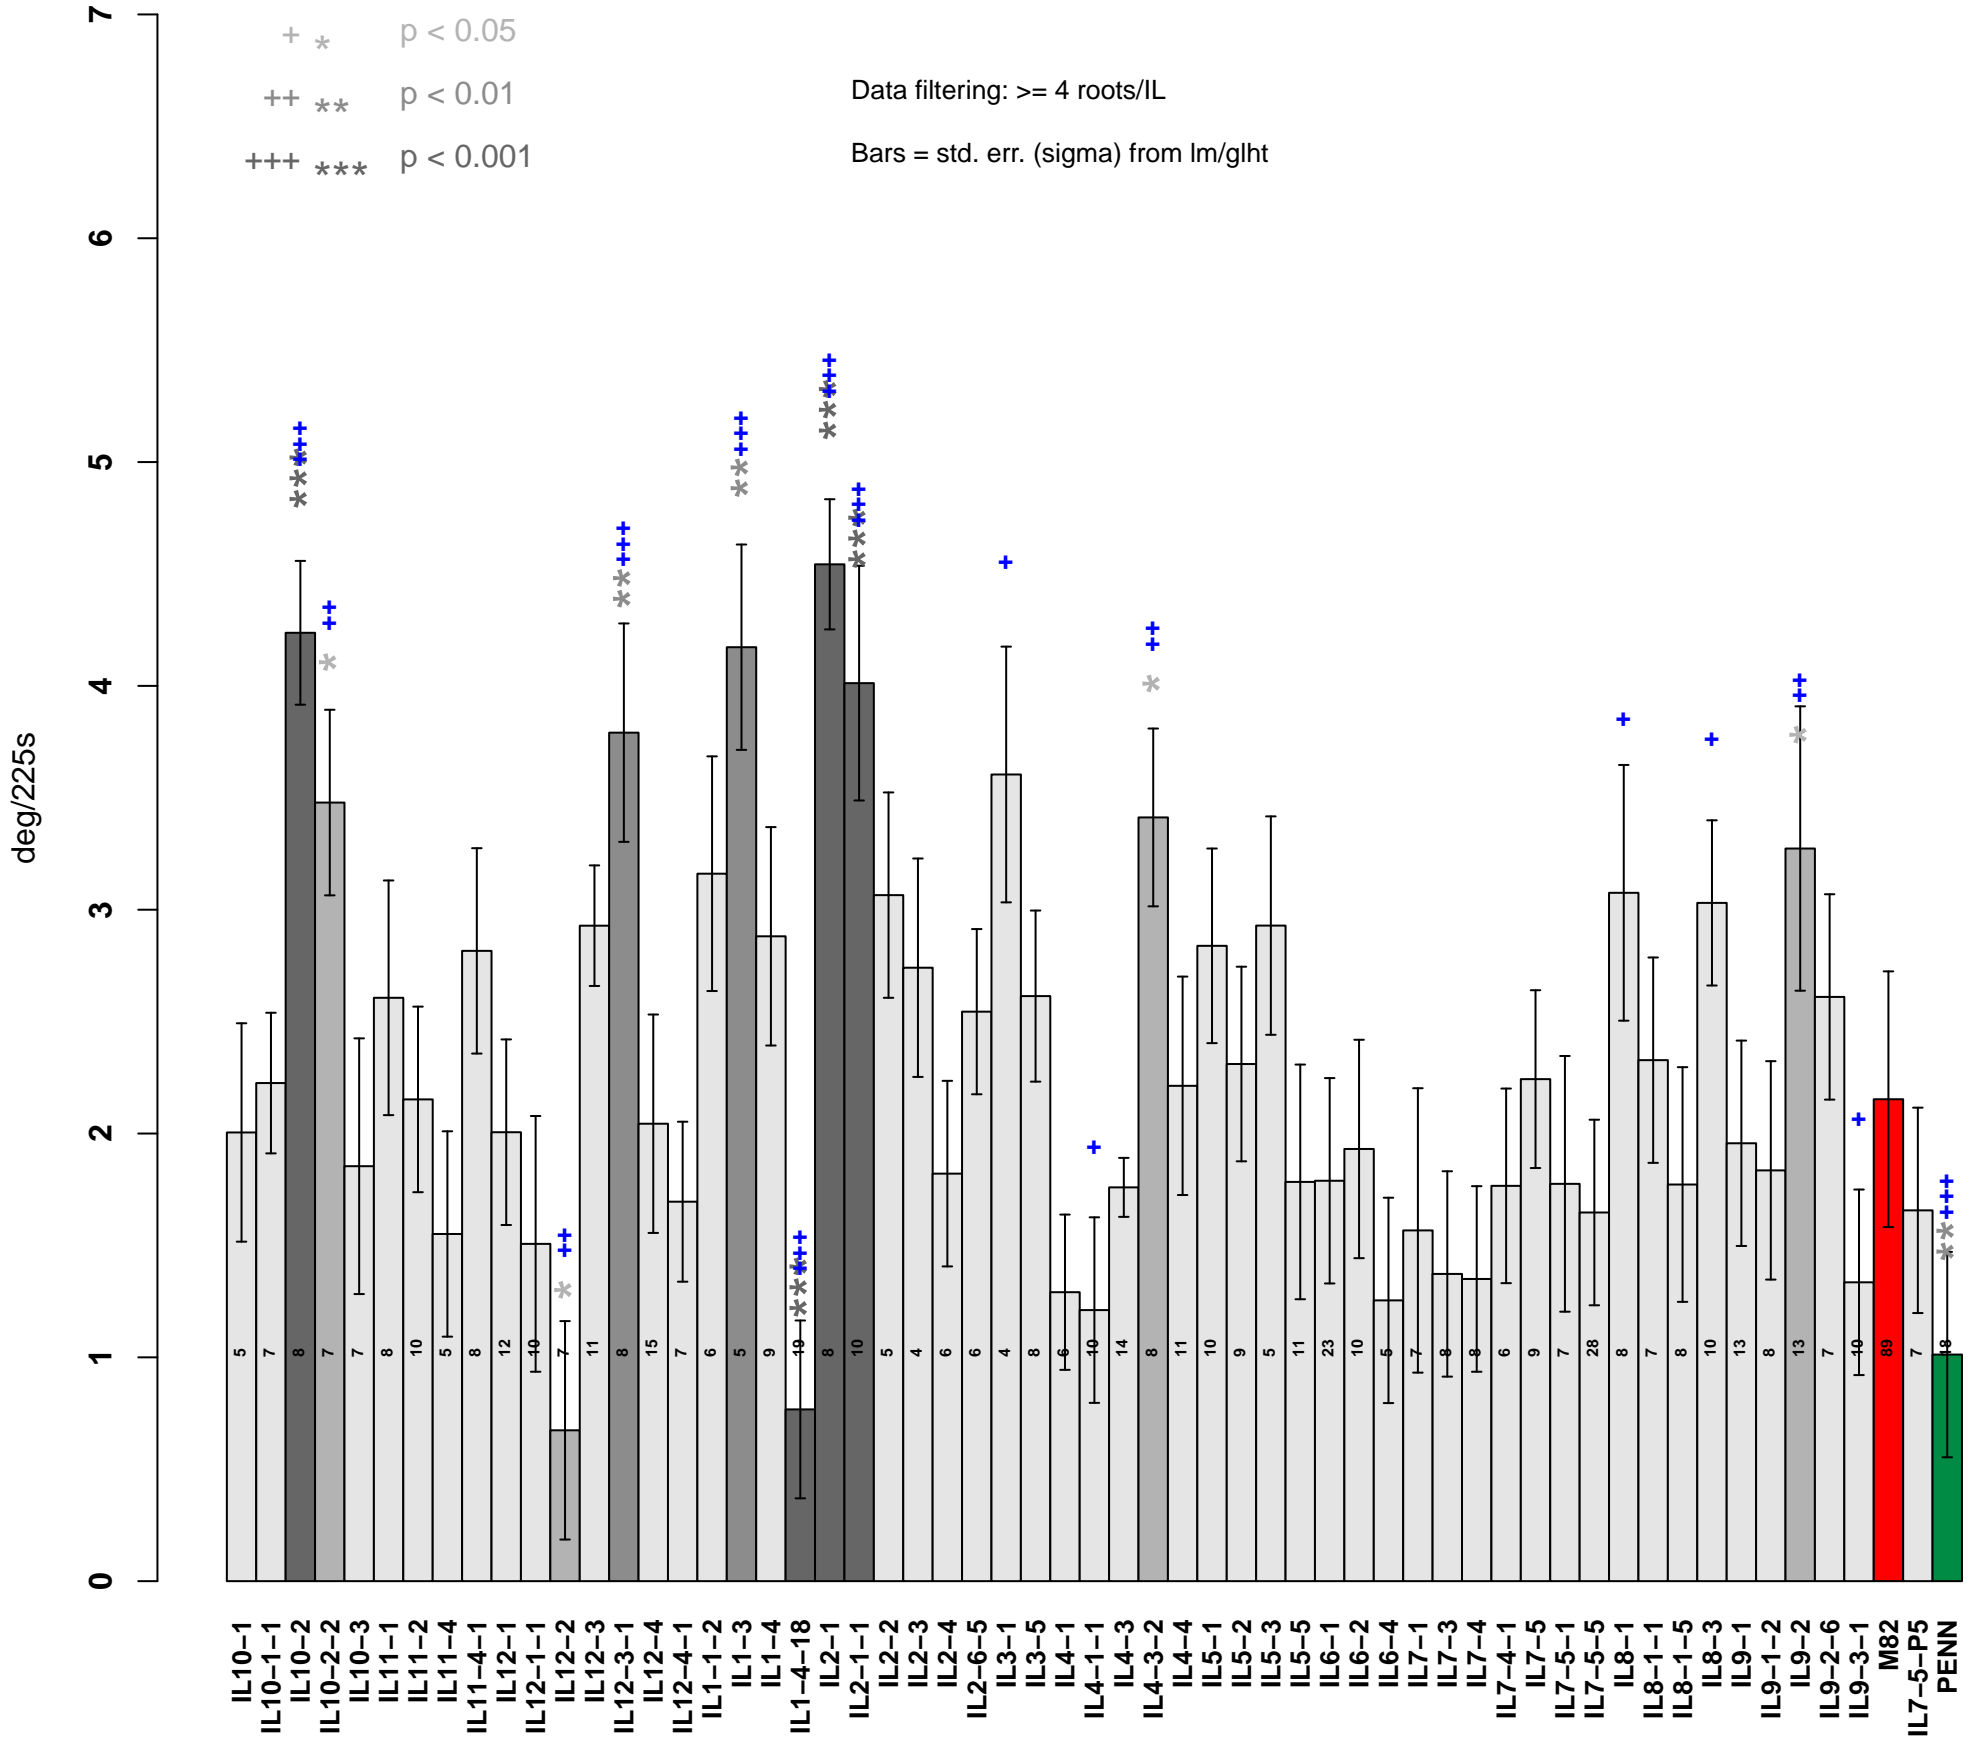

# Angle Rate T5

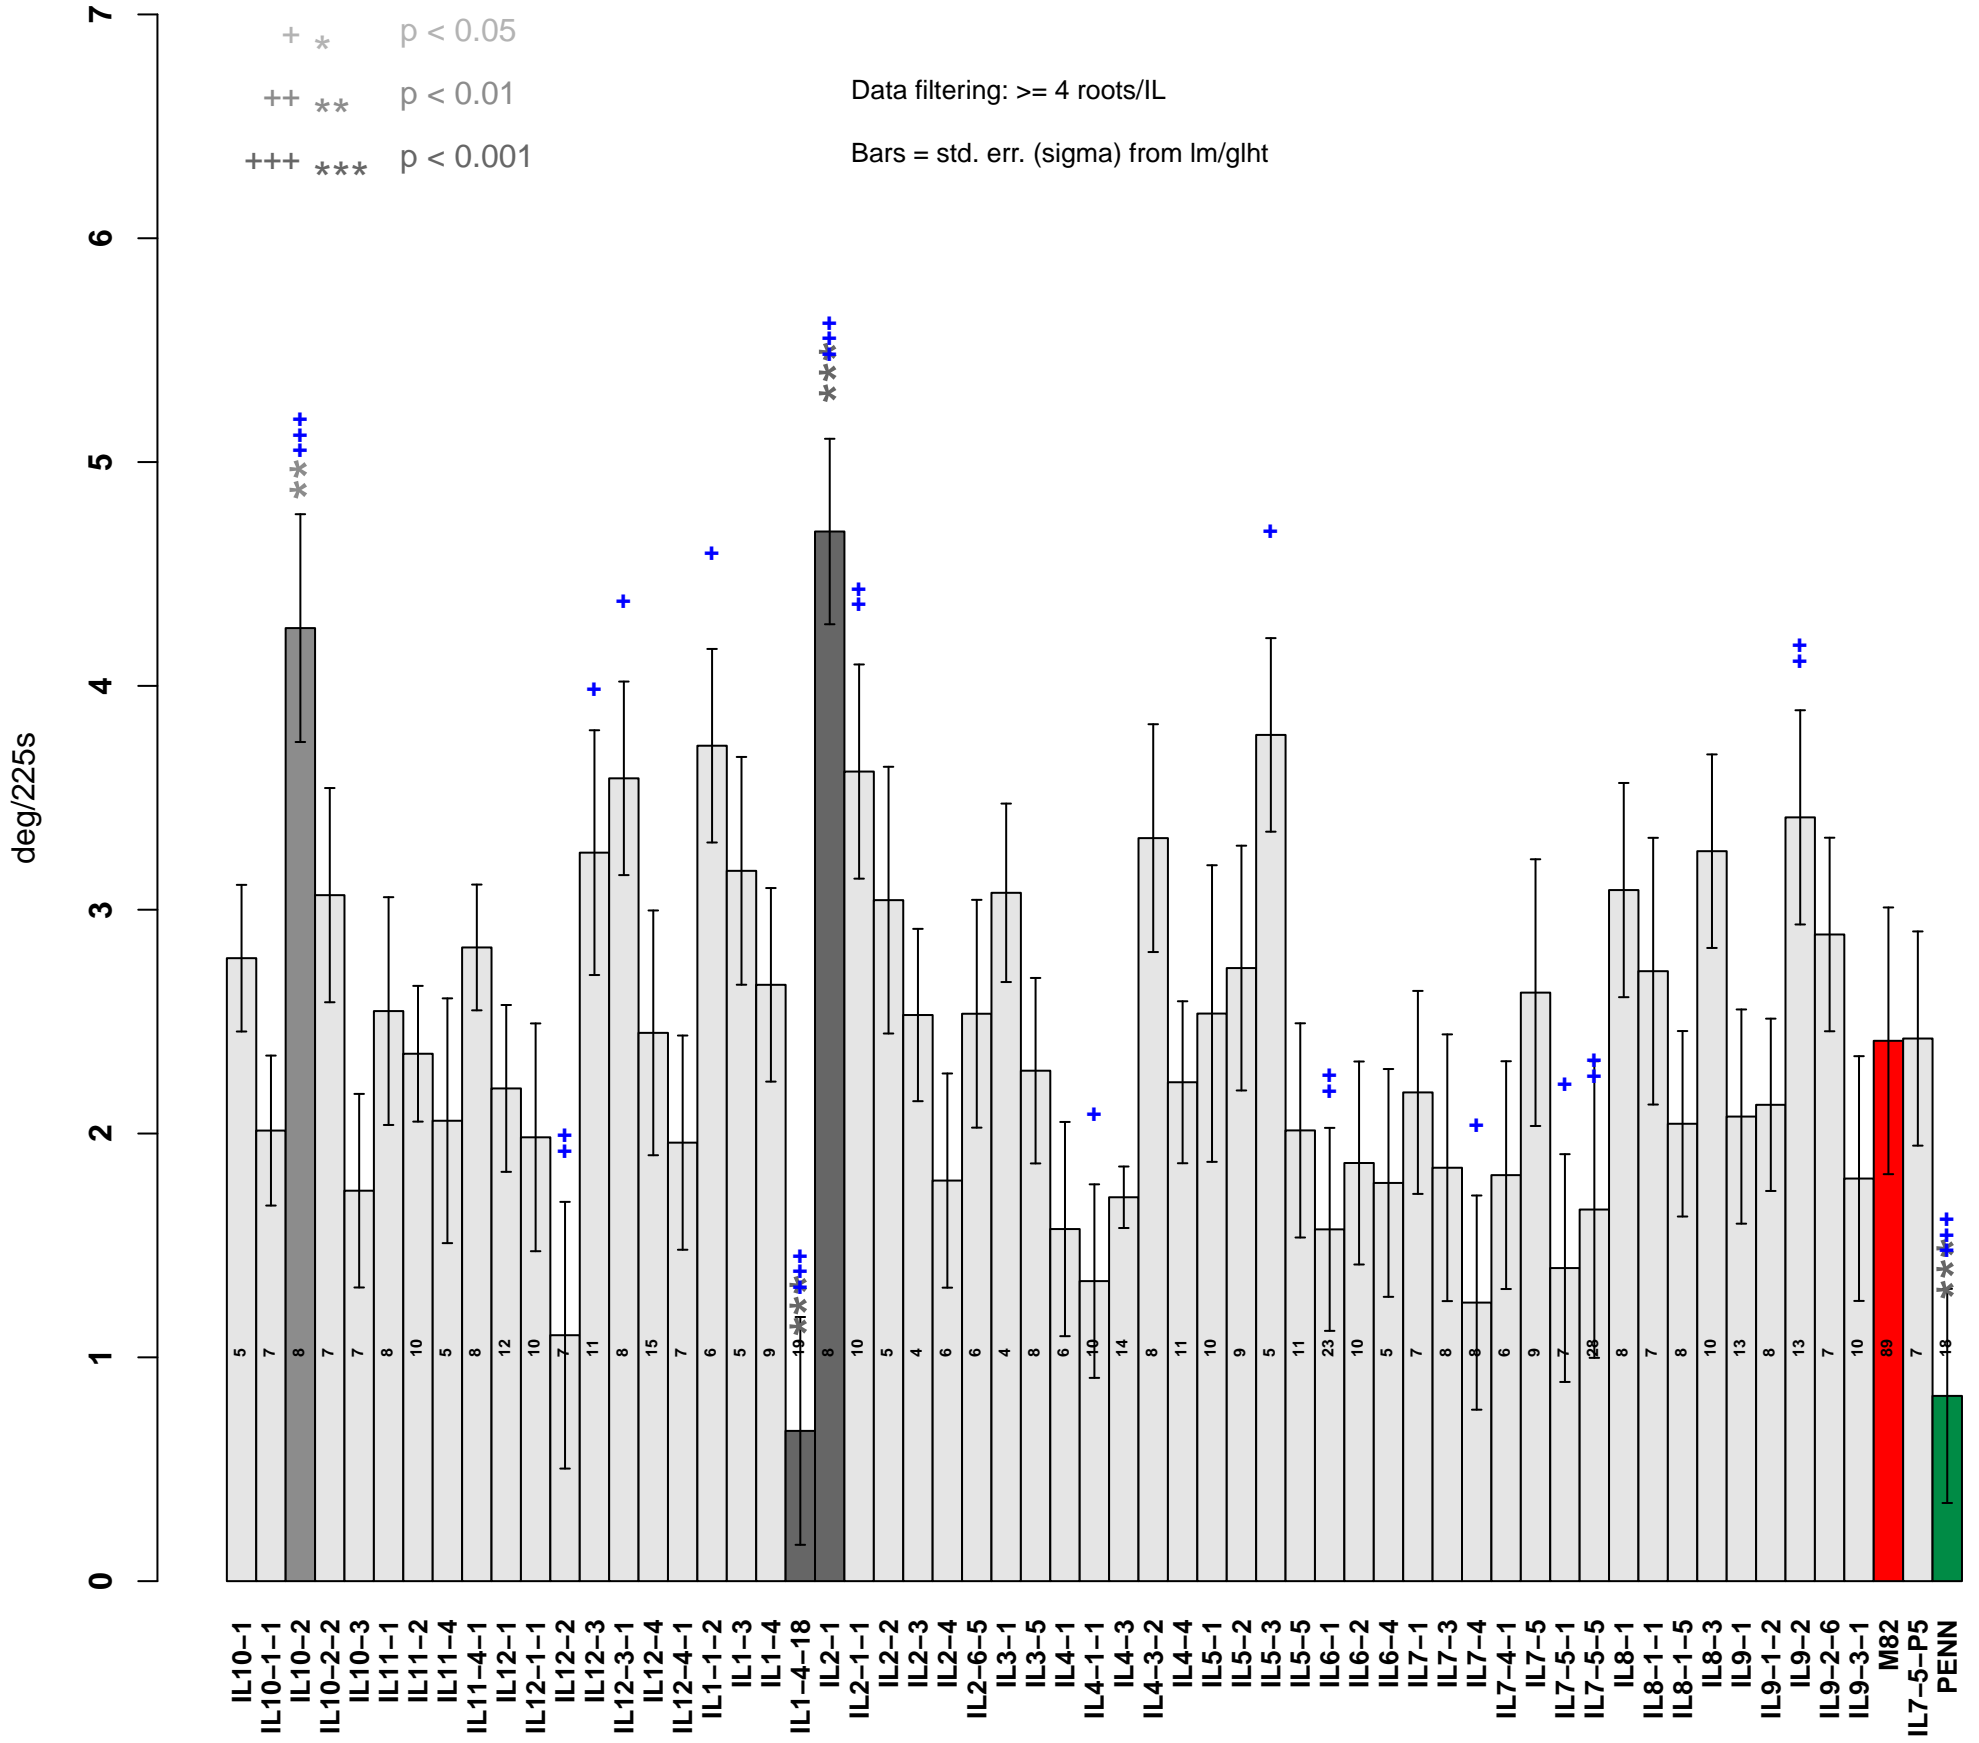

# Angle Rate T6

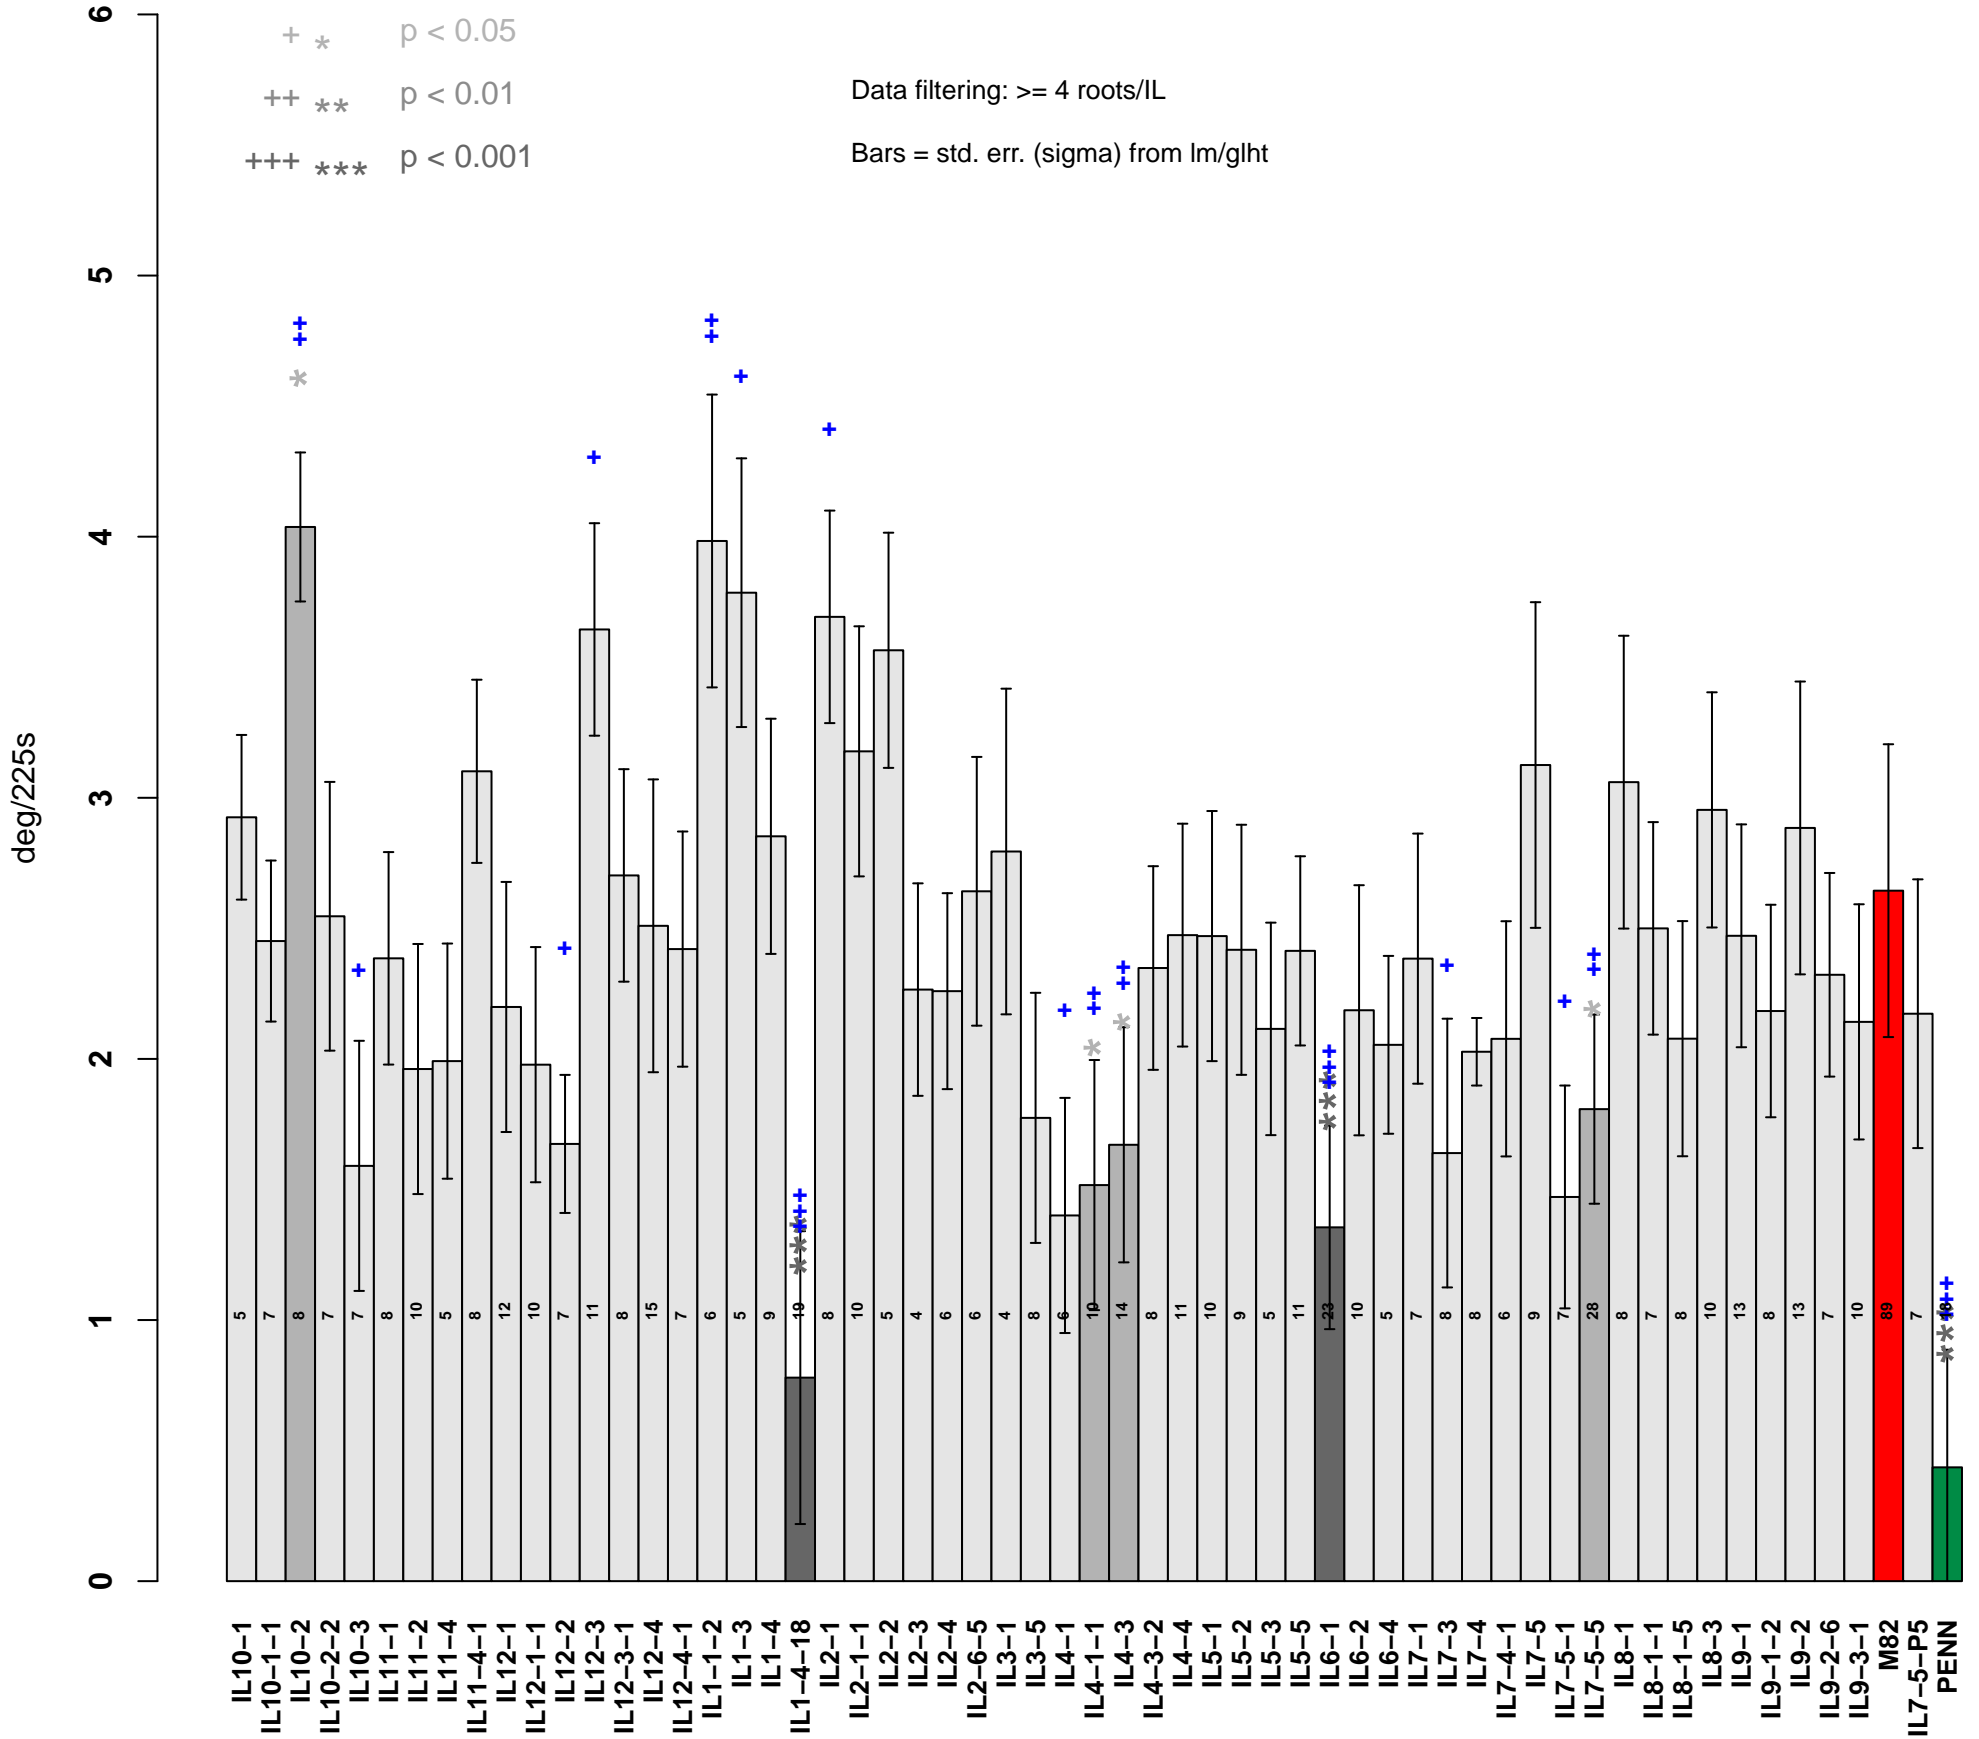

### Angle Rate T7

|     |     |             |
|-----|-----|-------------|
| +   | *   | $p < 0.05$  |
| ++  | **  | $p < 0.01$  |
| +++ | *** | $p < 0.001$ |

Data filtering:  $\geq 4$  roots/IL

Bars = std. err. (sigma) from lm/glht

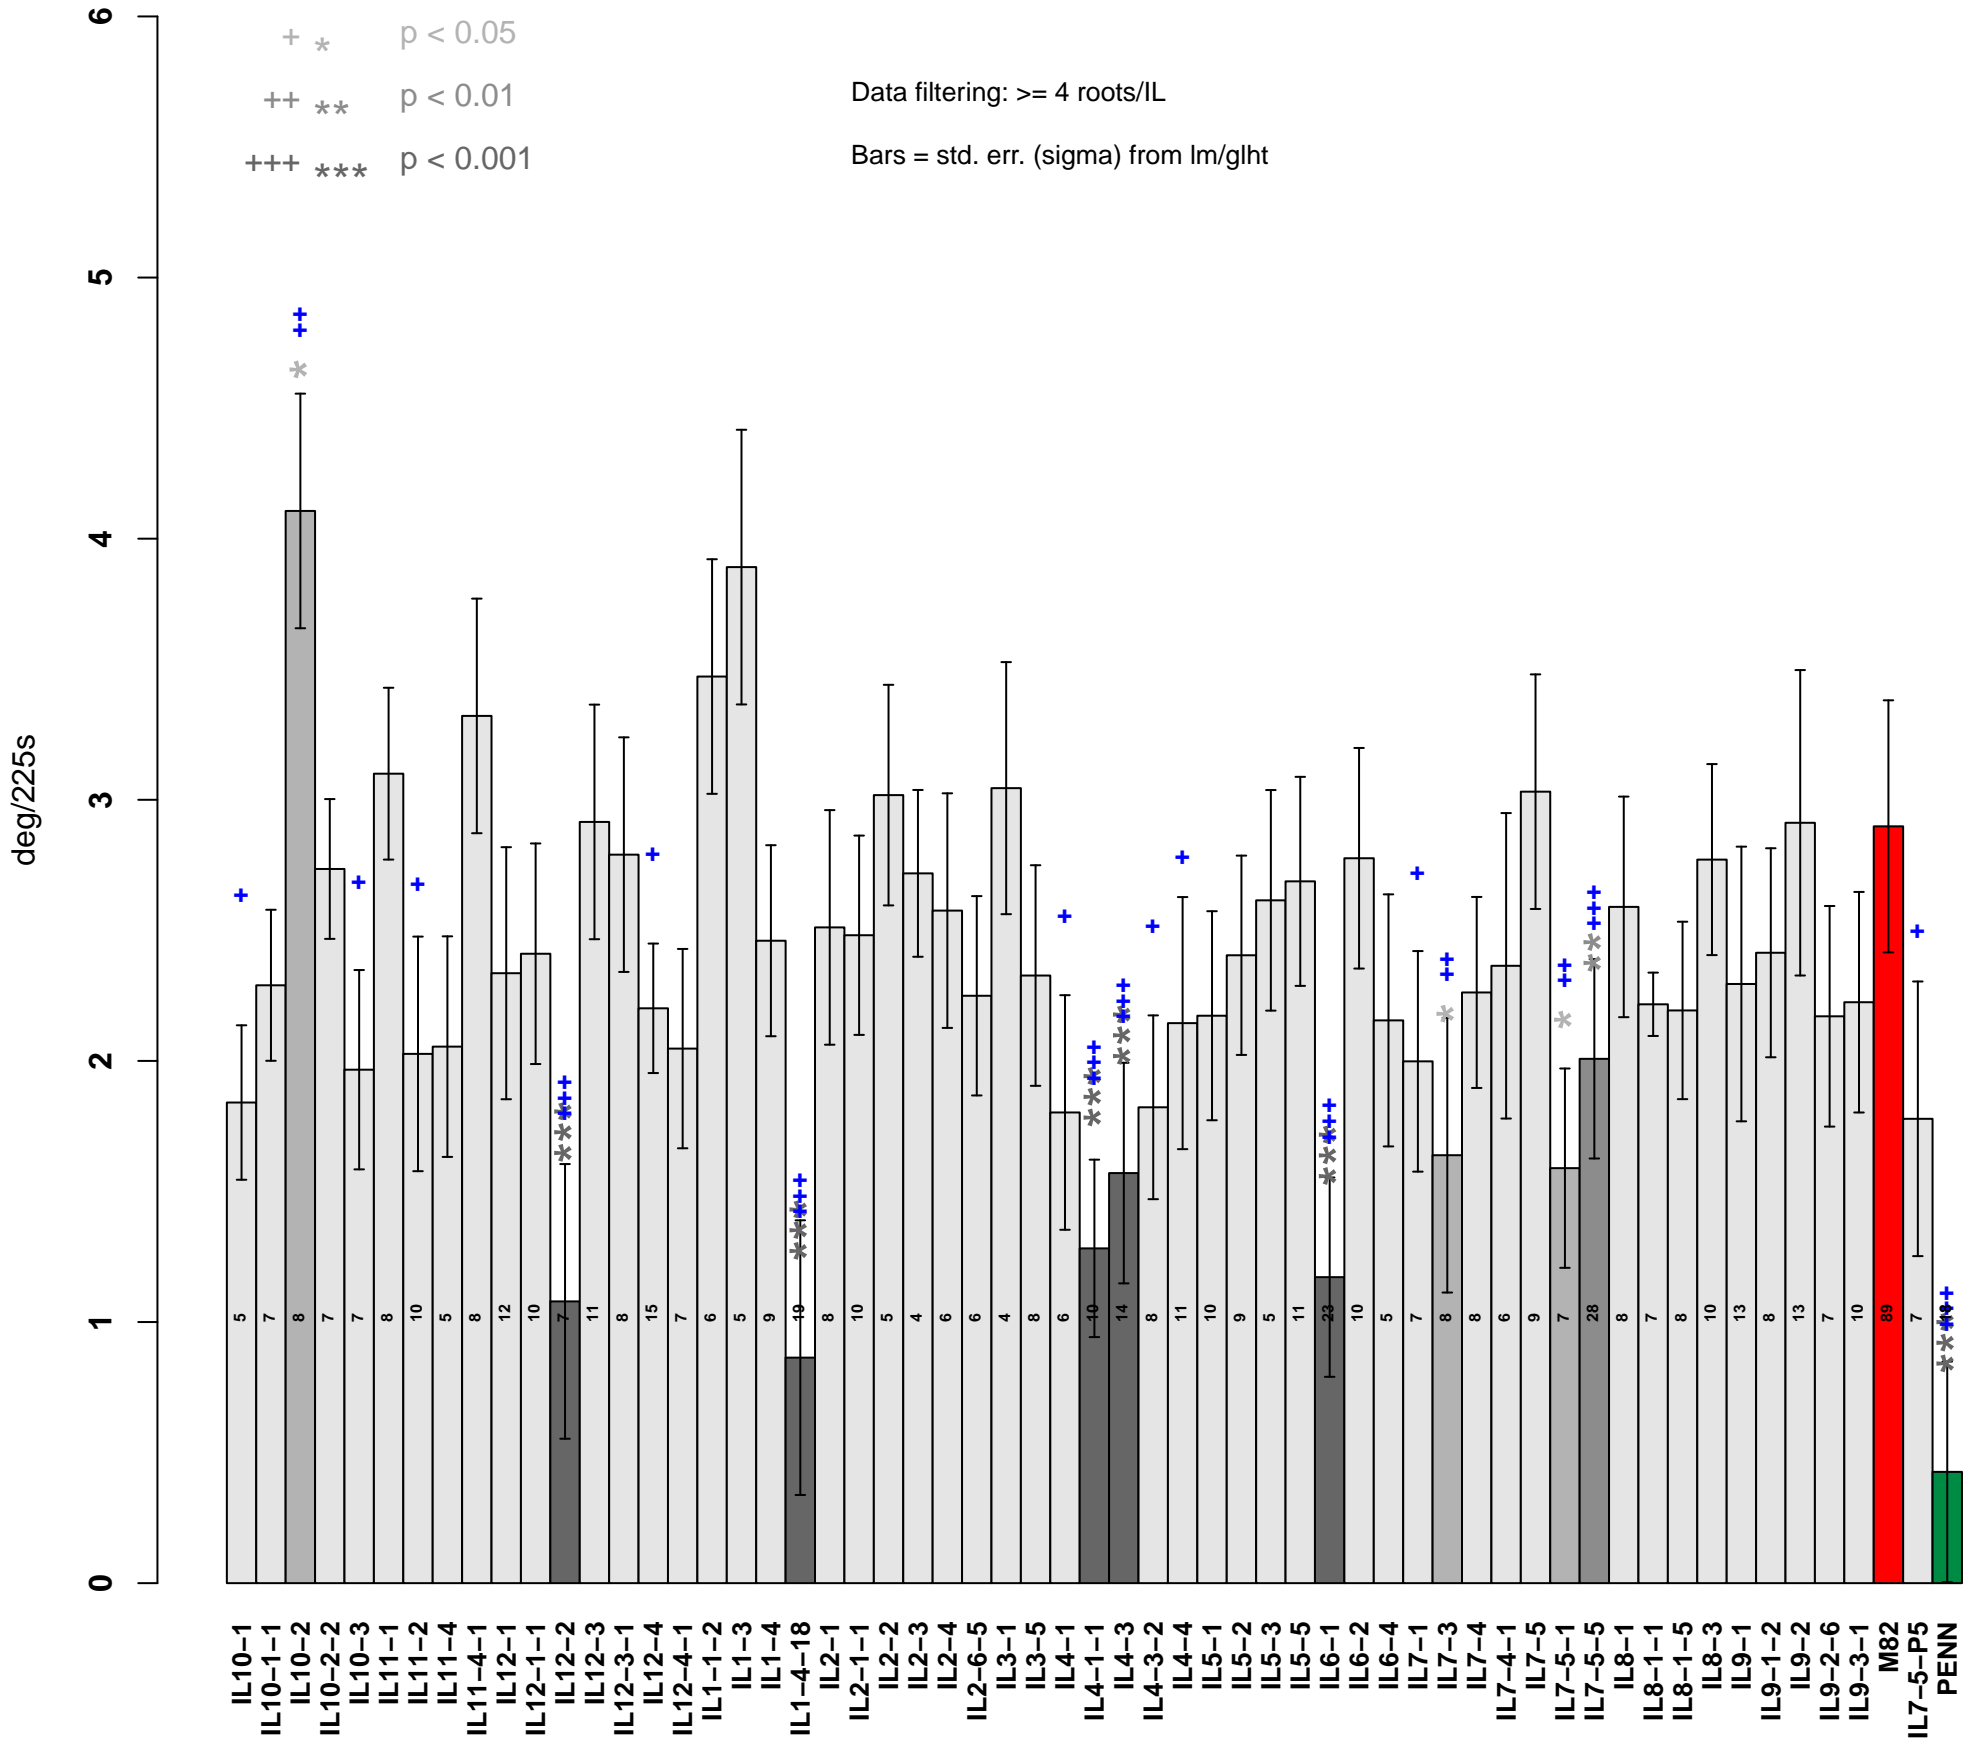



# Angle Rate T8

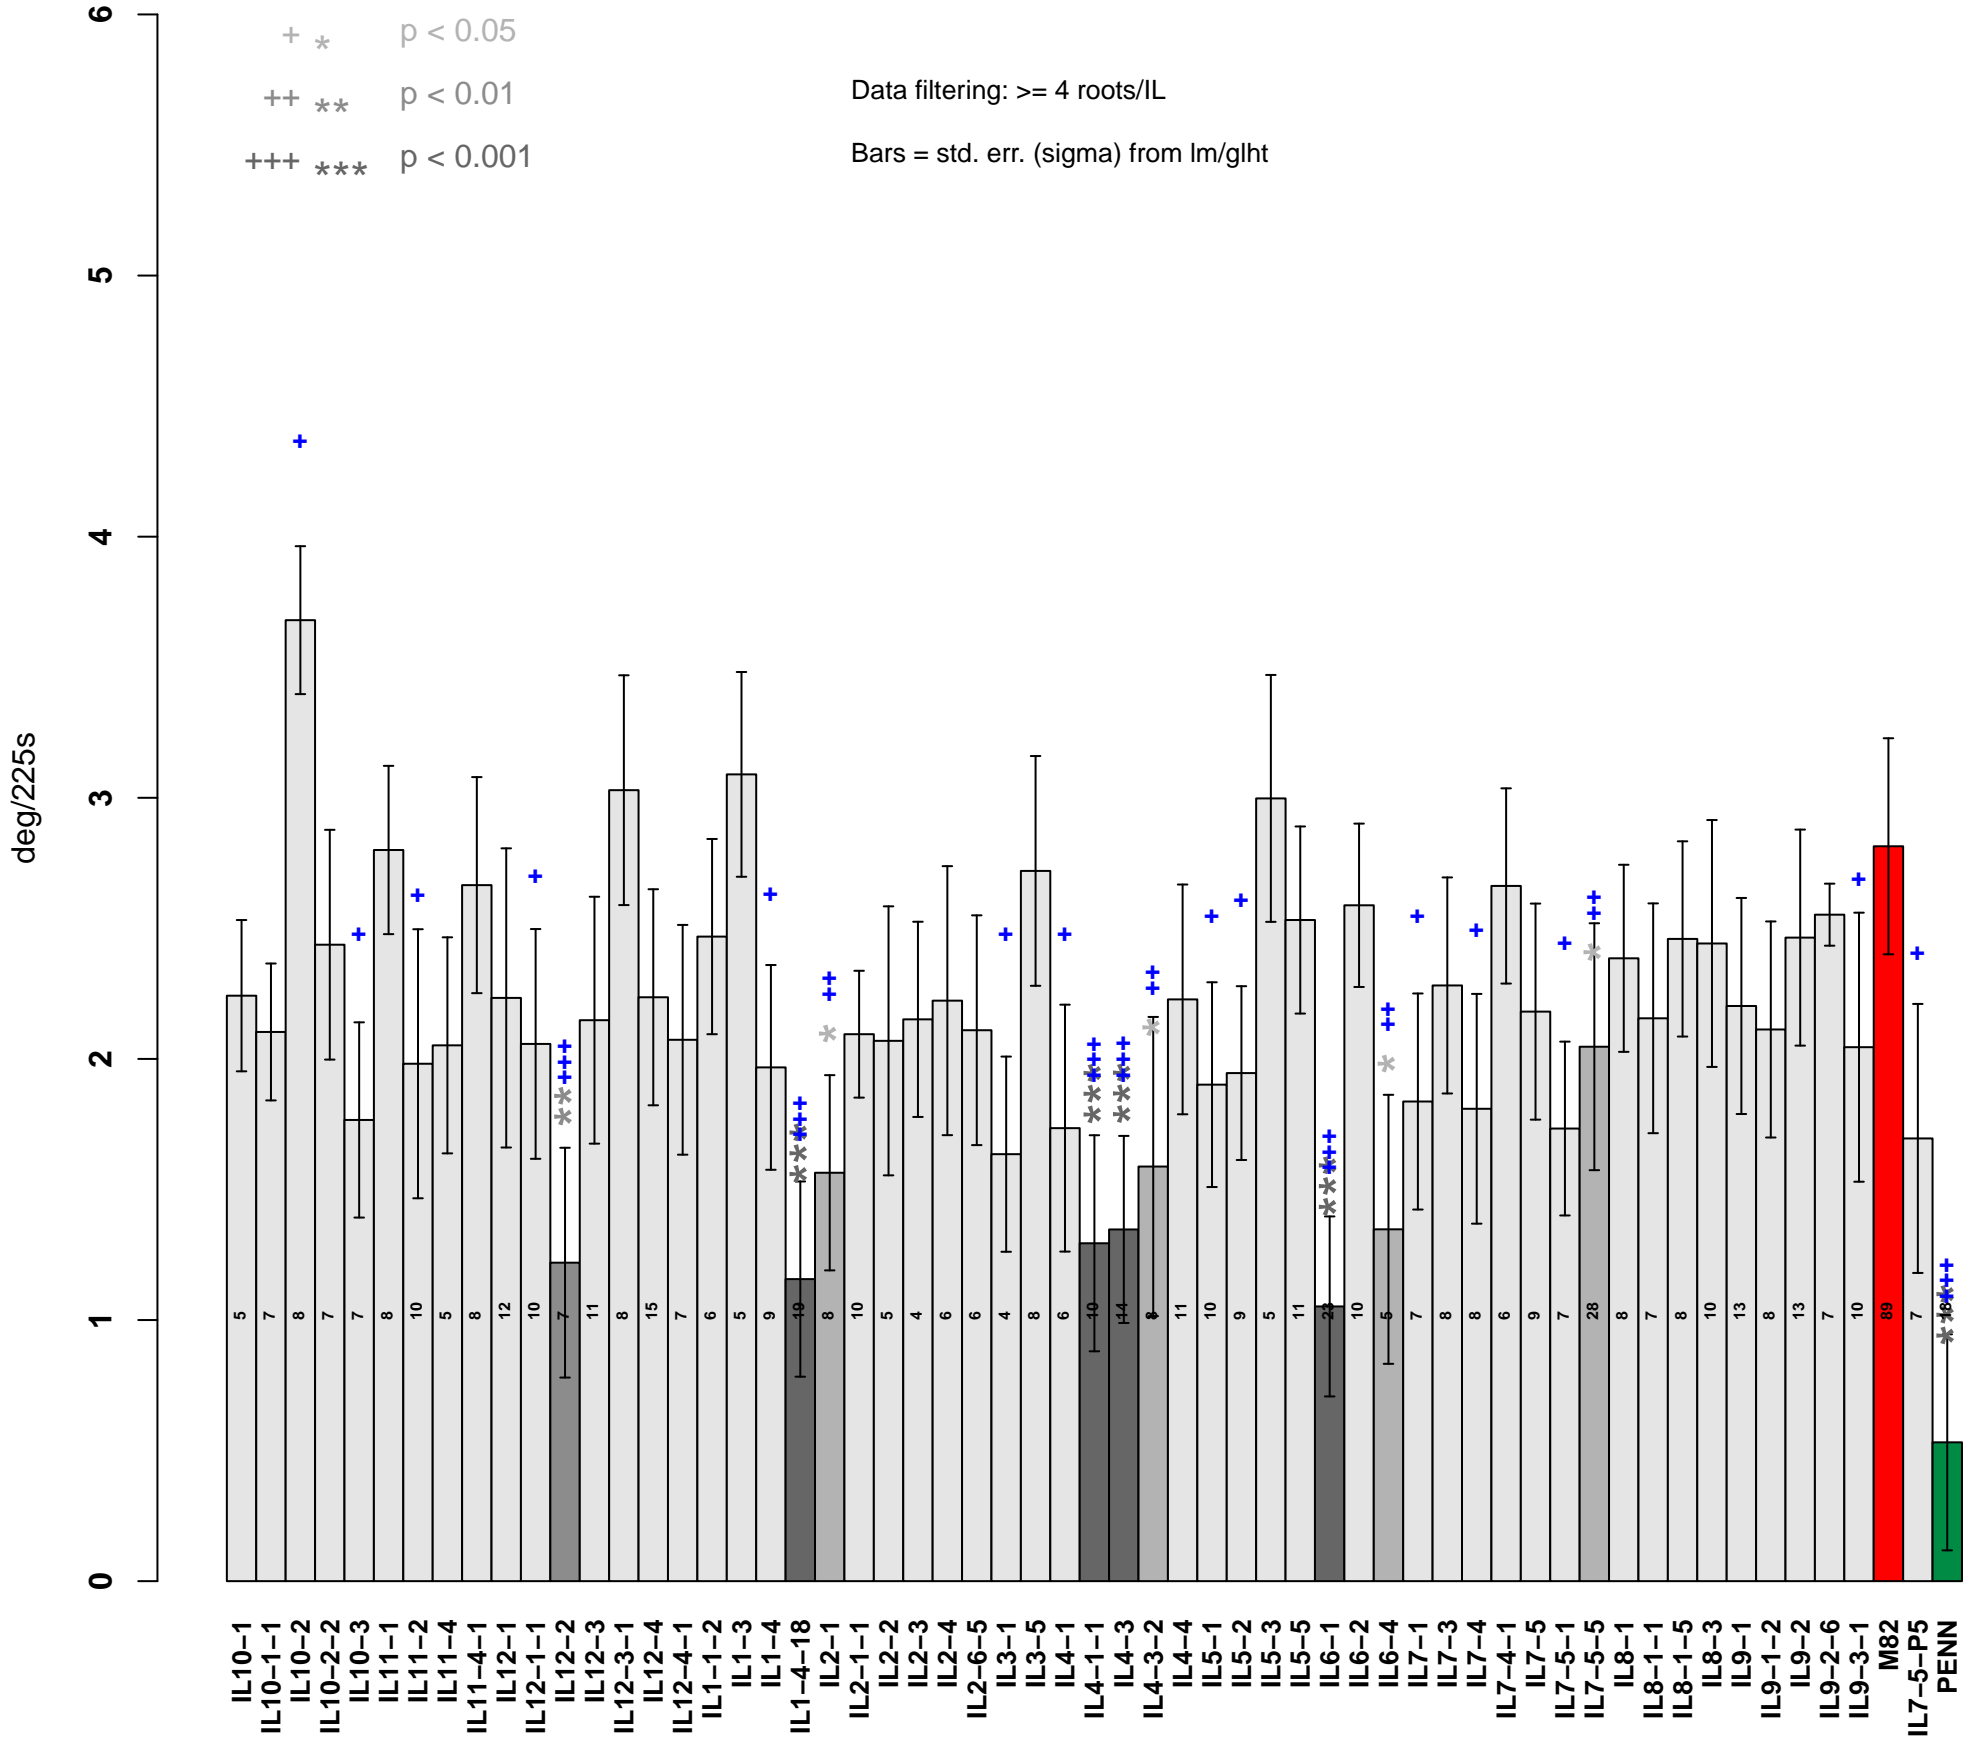

# Angle Rate T9

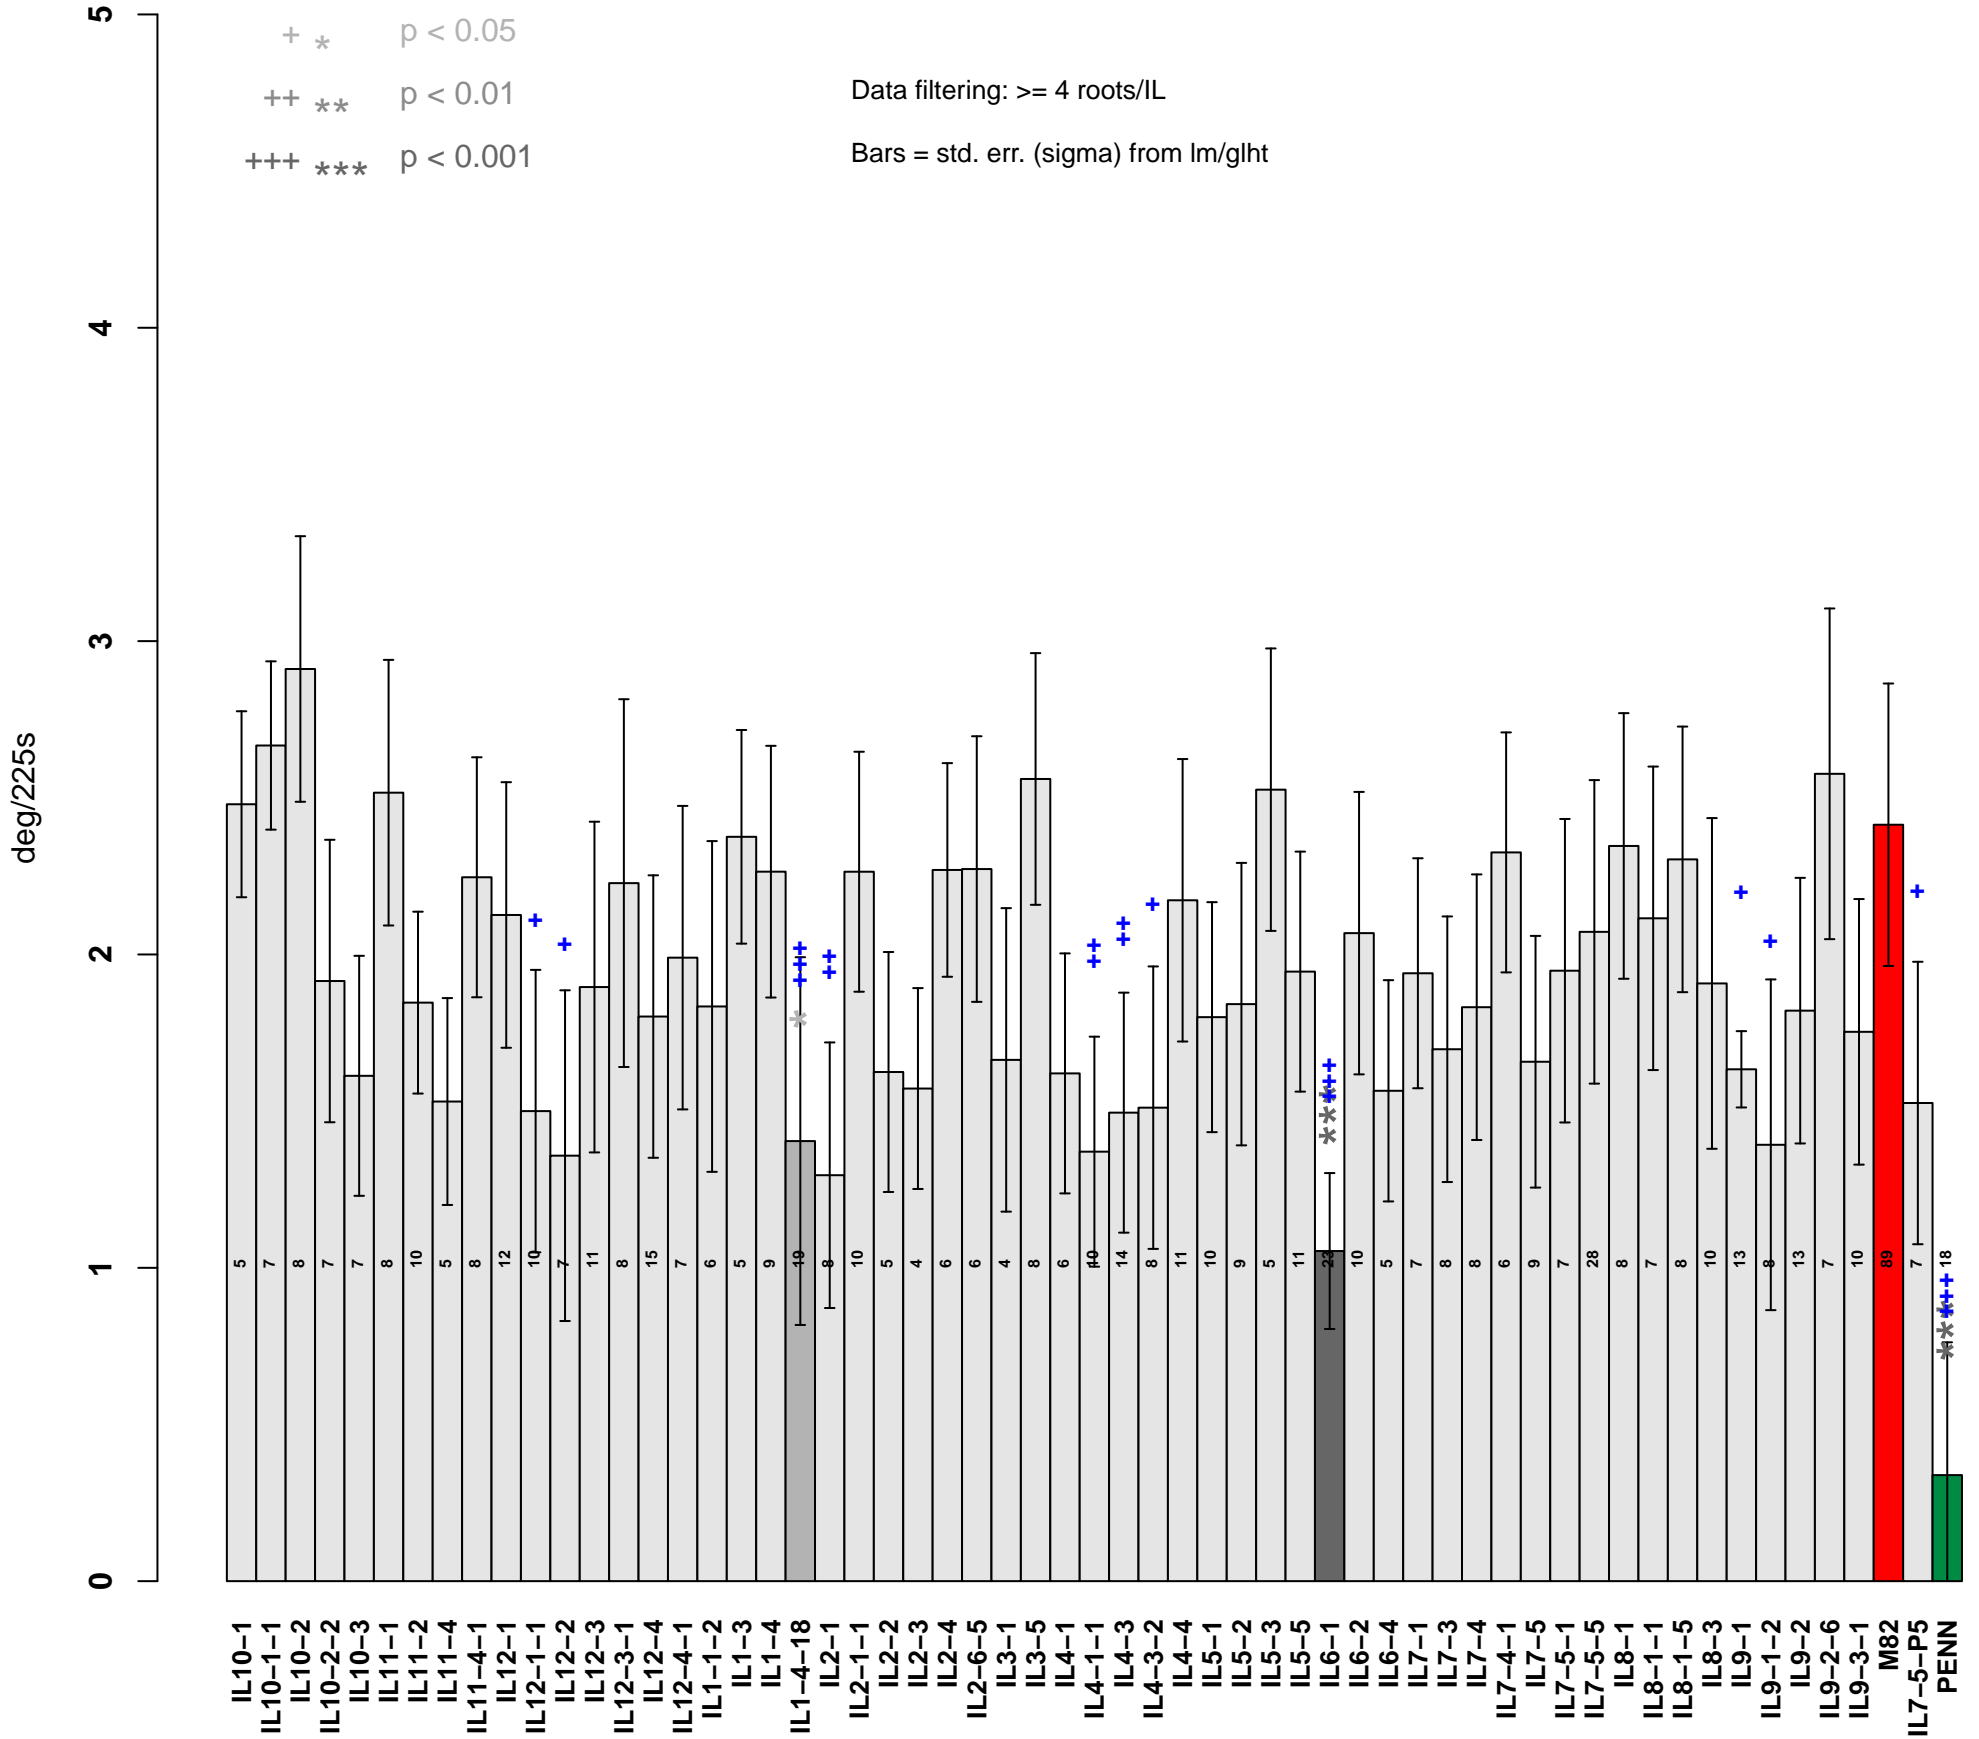

# Angle Rate T10

deg/225s

4  
3  
2  
1  
0

+ \* p < 0.05  
++ \*\* p < 0.01  
+++ \*\*\* p < 0.001

Data filtering: >= 4 roots/IL

Bars = std. err. (sigma) from lm/glht

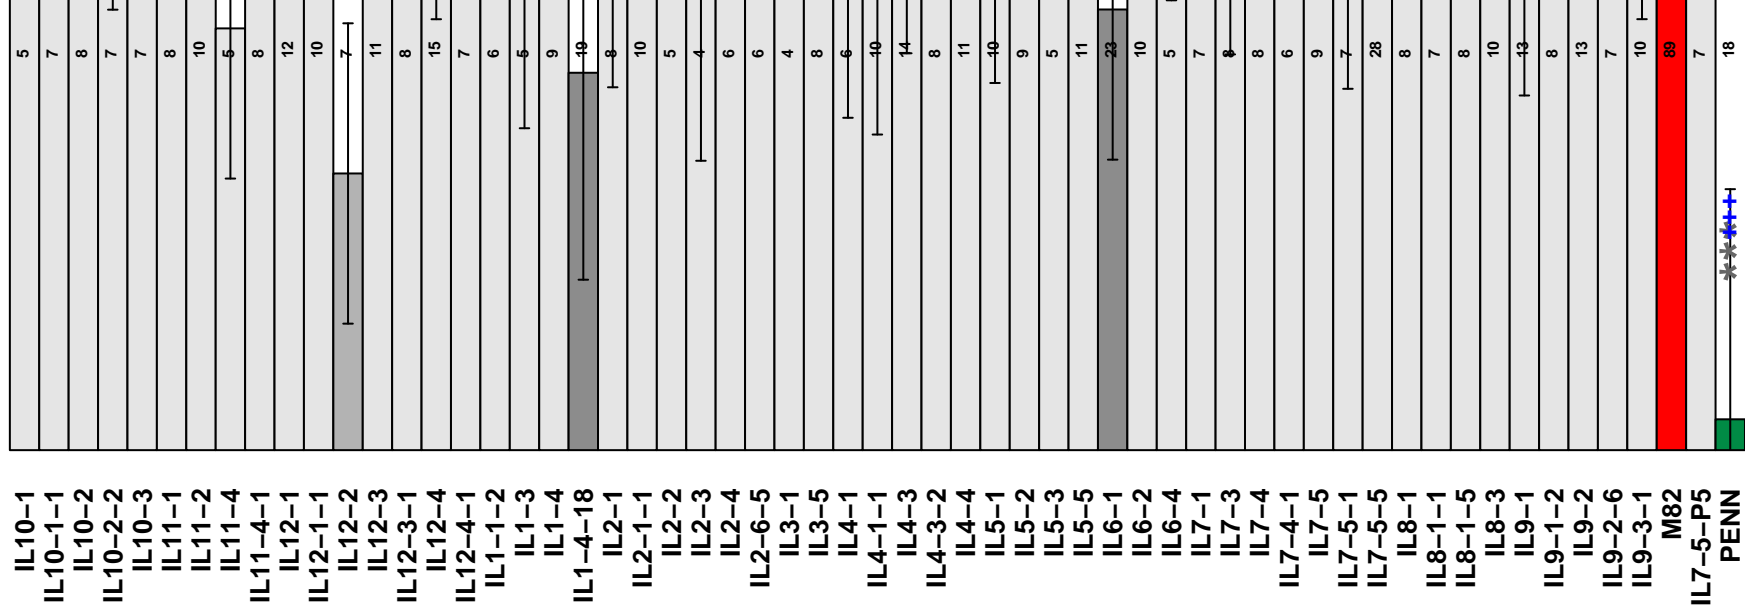

# Angle Rate T11

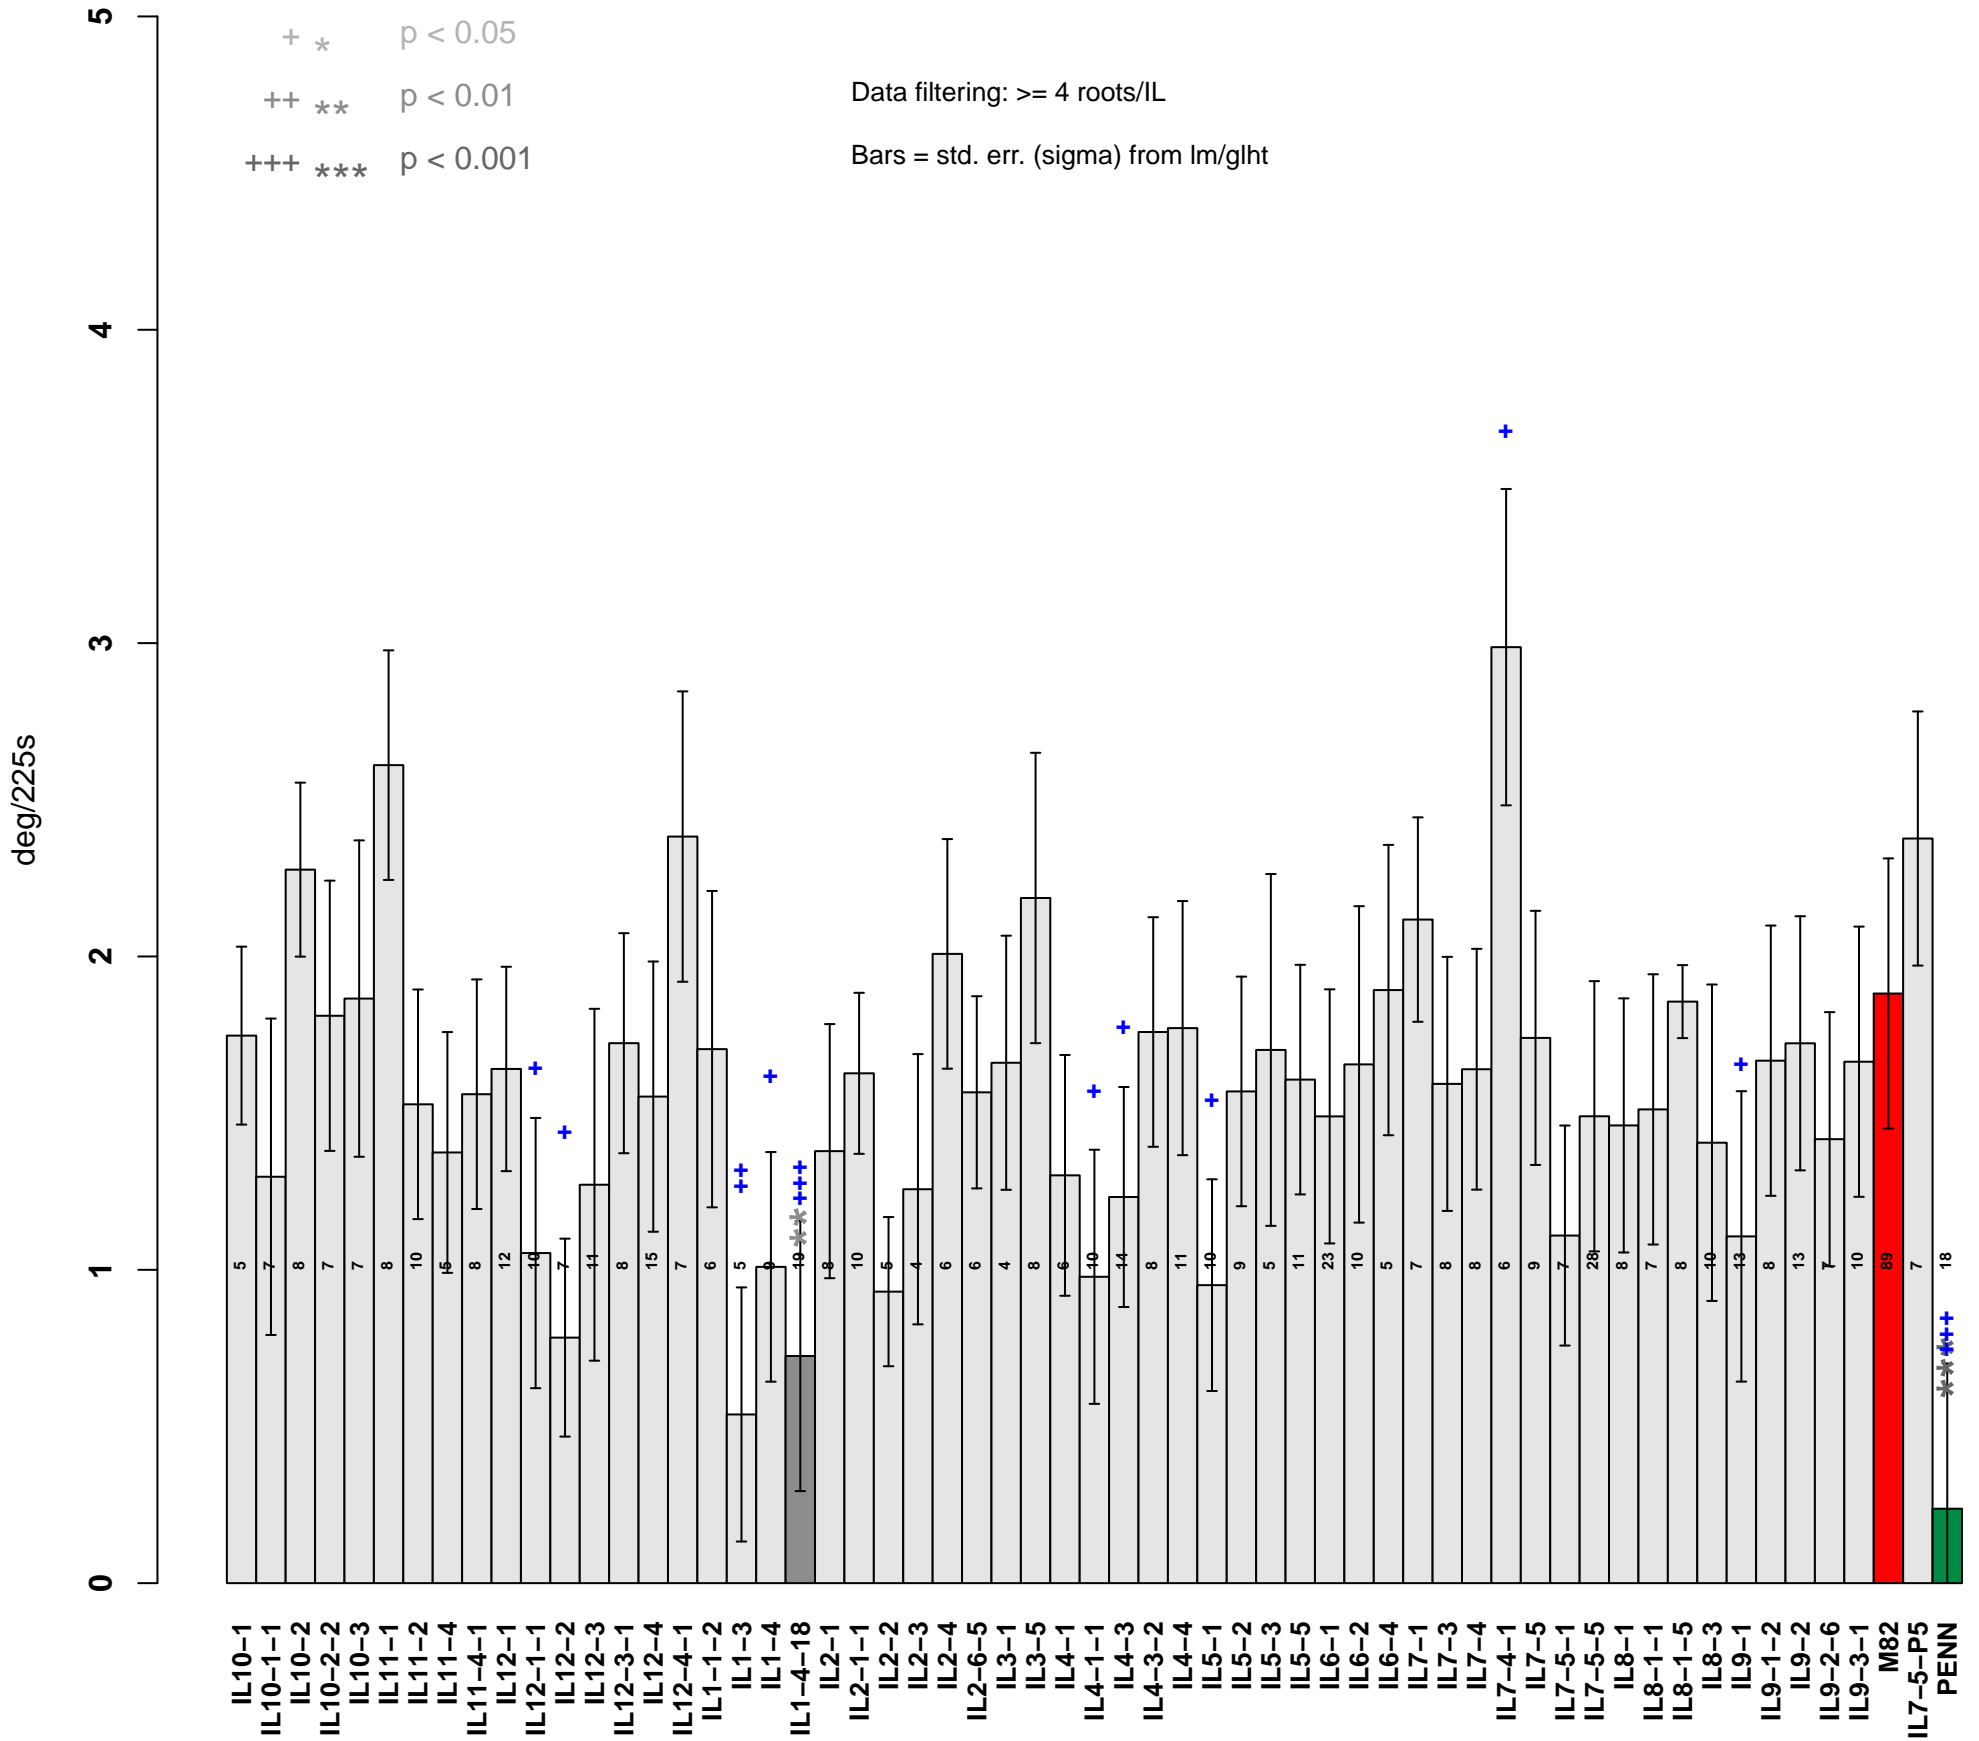

# Angle Rate T12

deg/225s

+ \*  $p < 0.05$   
 ++ \*\*  $p < 0.01$   
 +++ \*\*\*  $p < 0.001$

Data filtering:  $\geq 4$  roots/IL

Bars = std. err. (sigma) from lm/glht

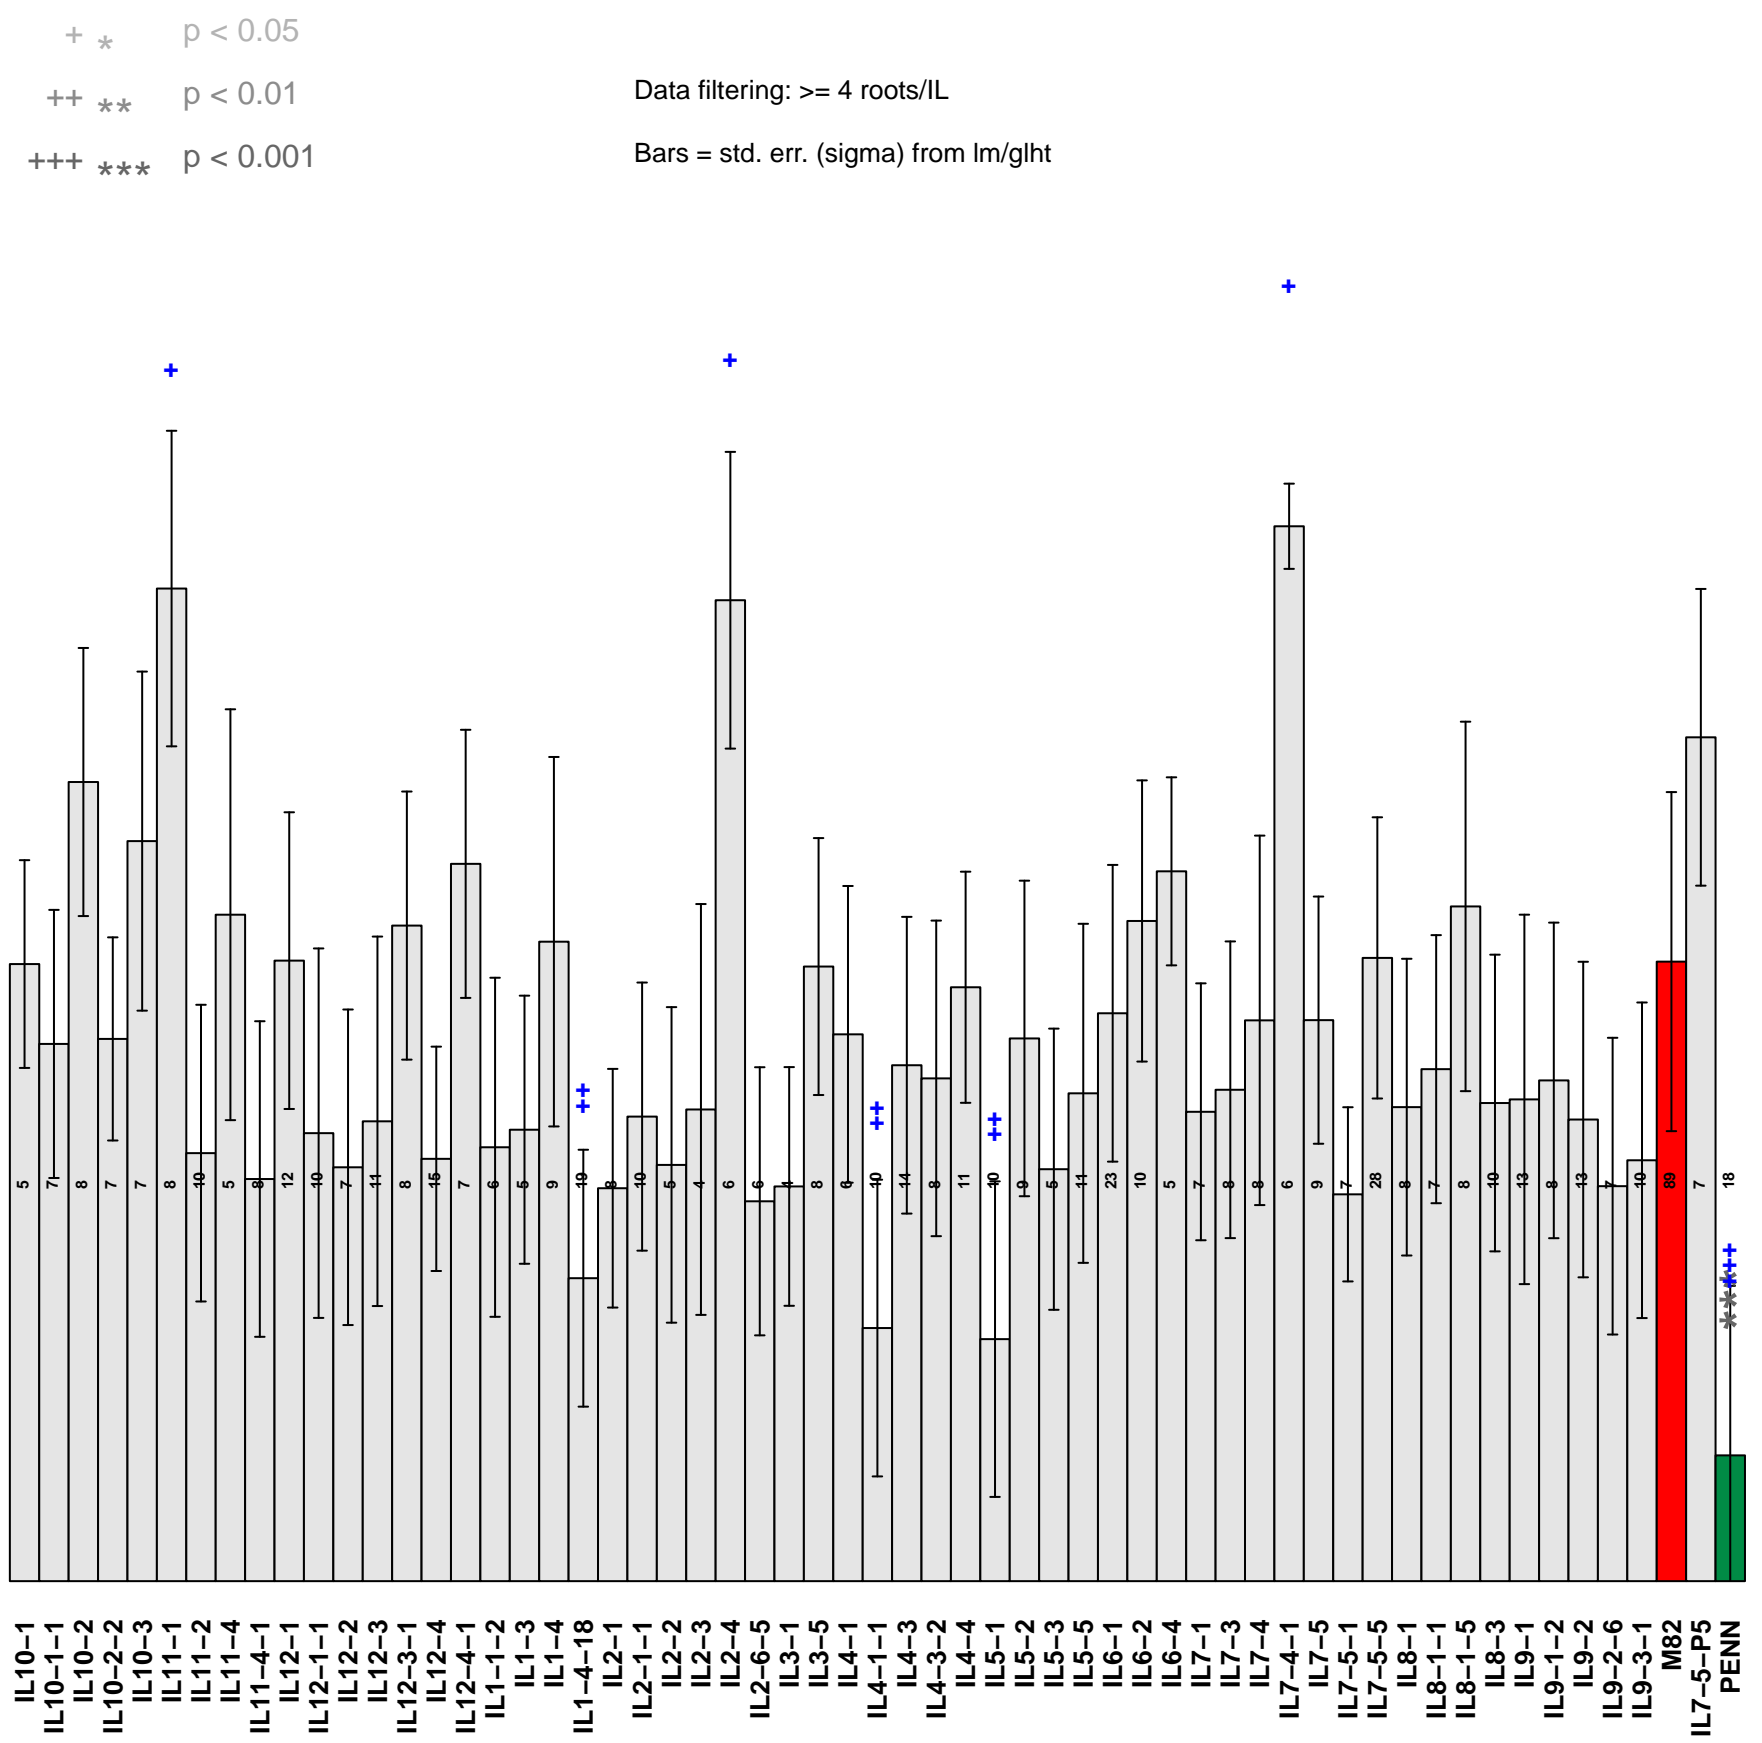

# Angle Rate T13

+ \* p < 0.05  
 ++ \*\* p < 0.01  
 +++ \*\*\* p < 0.001

Data filtering: >= 4 roots/IL

Bars = std. err. (sigma) from lm/glht

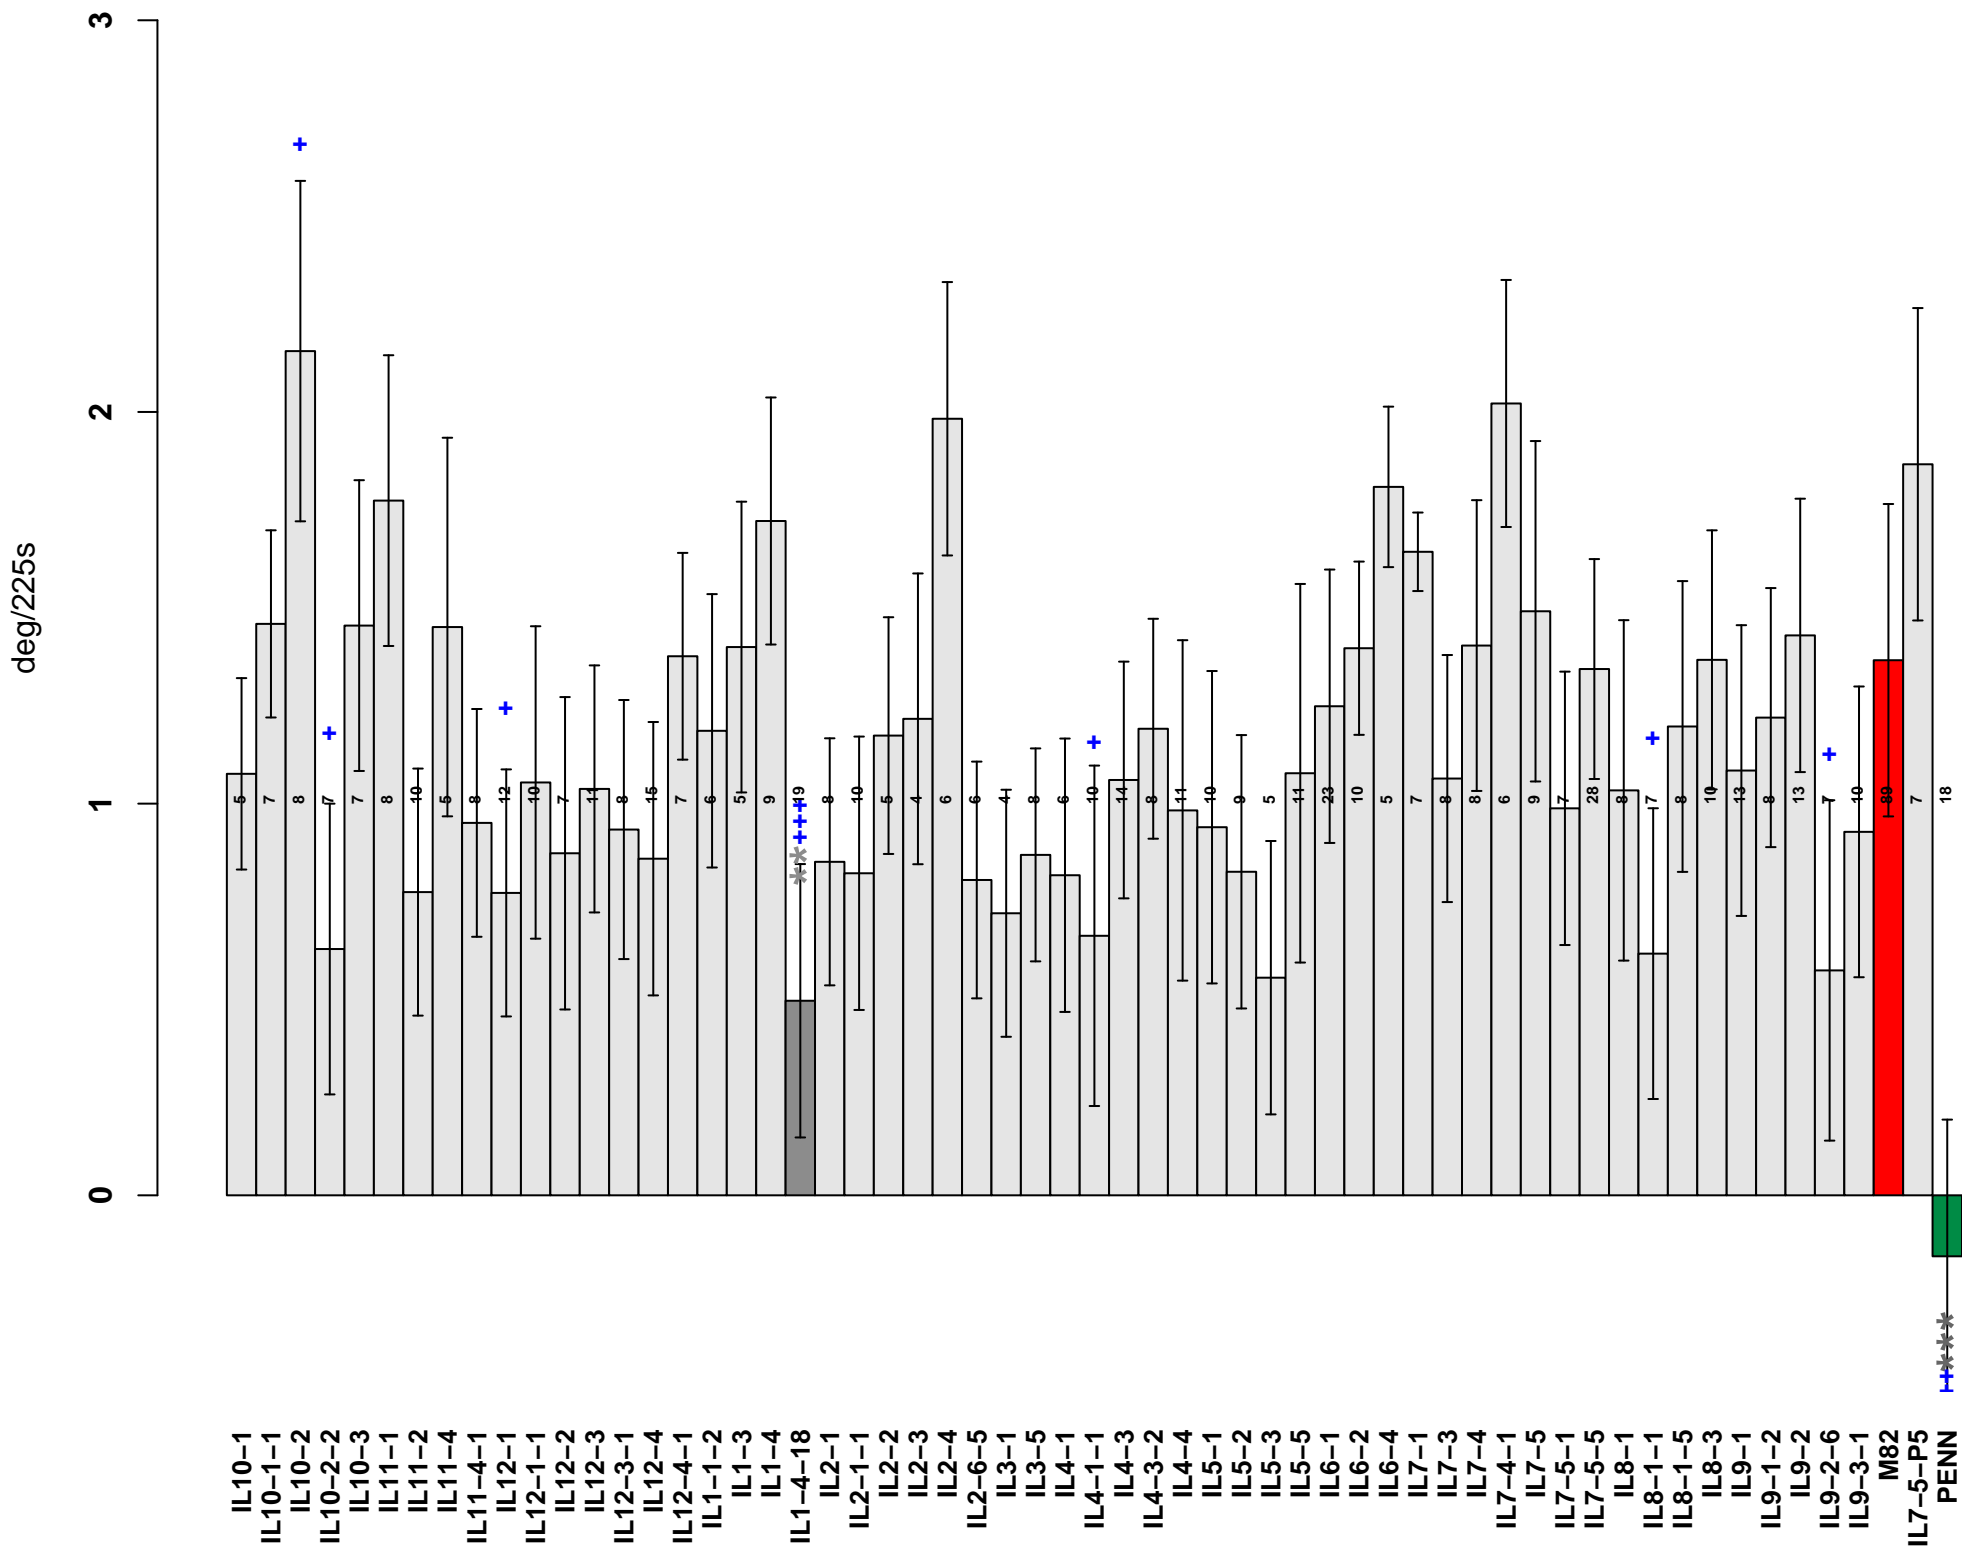

# Angle Rate T14

+ \* p < 0.05  
 ++ \*\* p < 0.01  
 +++ \*\*\* p < 0.001

Data filtering: >= 4 roots/IL

Bars = std. err. (sigma) from lm/glht

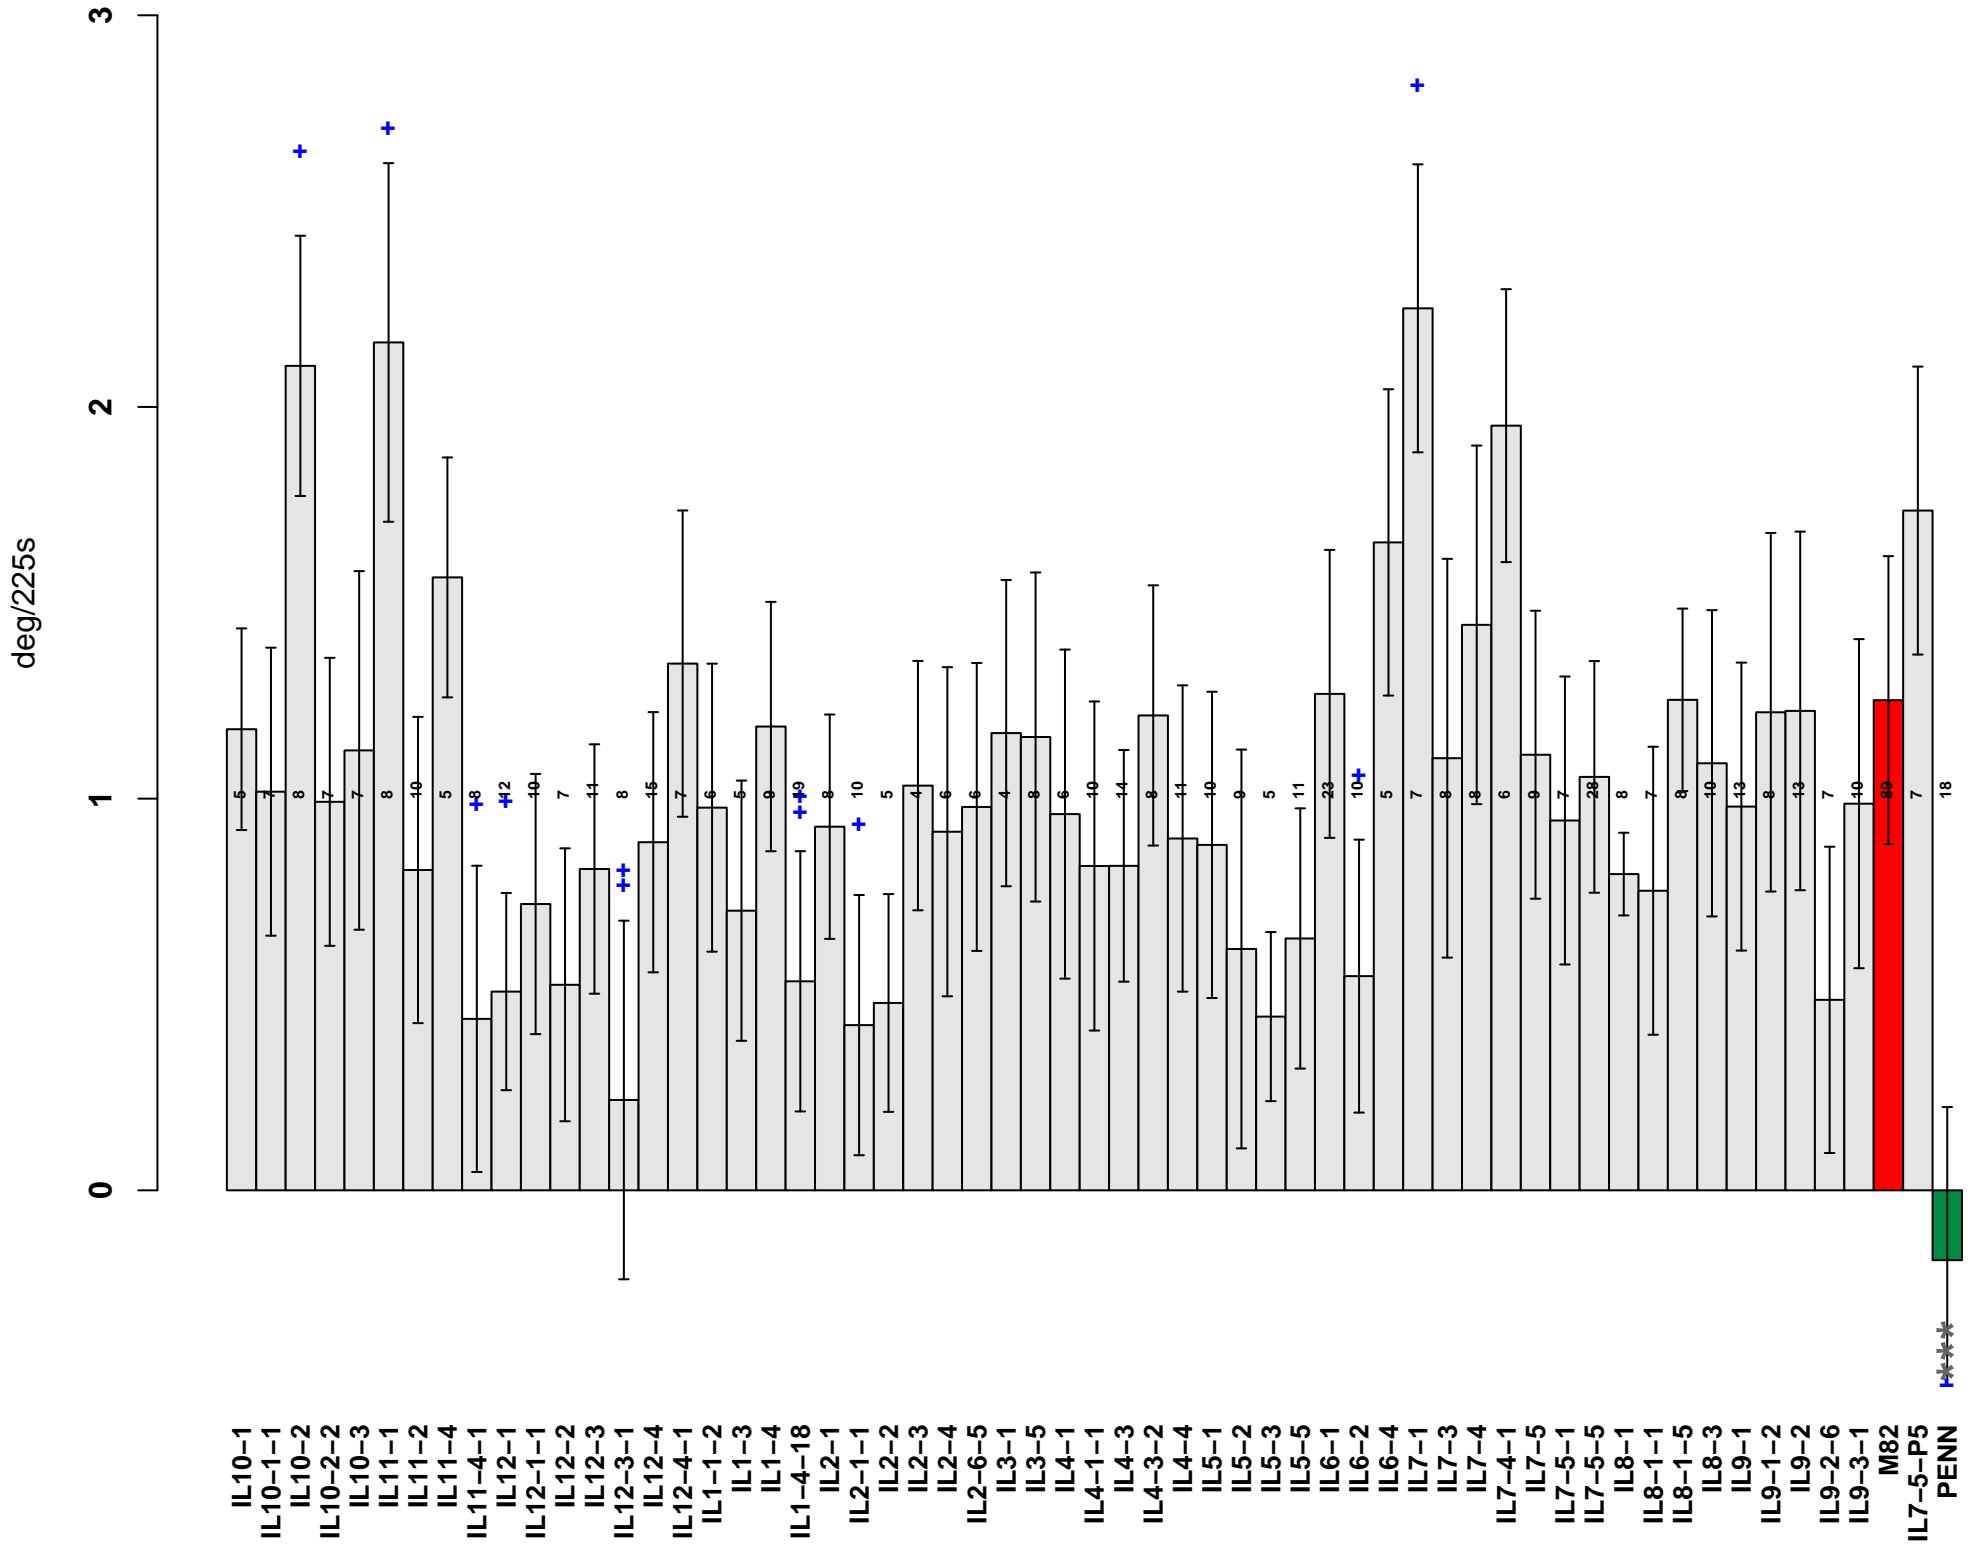

# Angle Rate T15

deg/225s

+ \* p < 0.05  
 ++ \*\* p < 0.01  
 +++ \*\*\* p < 0.001

Data filtering: >= 4 roots/IL

Bars = std. err. (sigma) from lm/glht

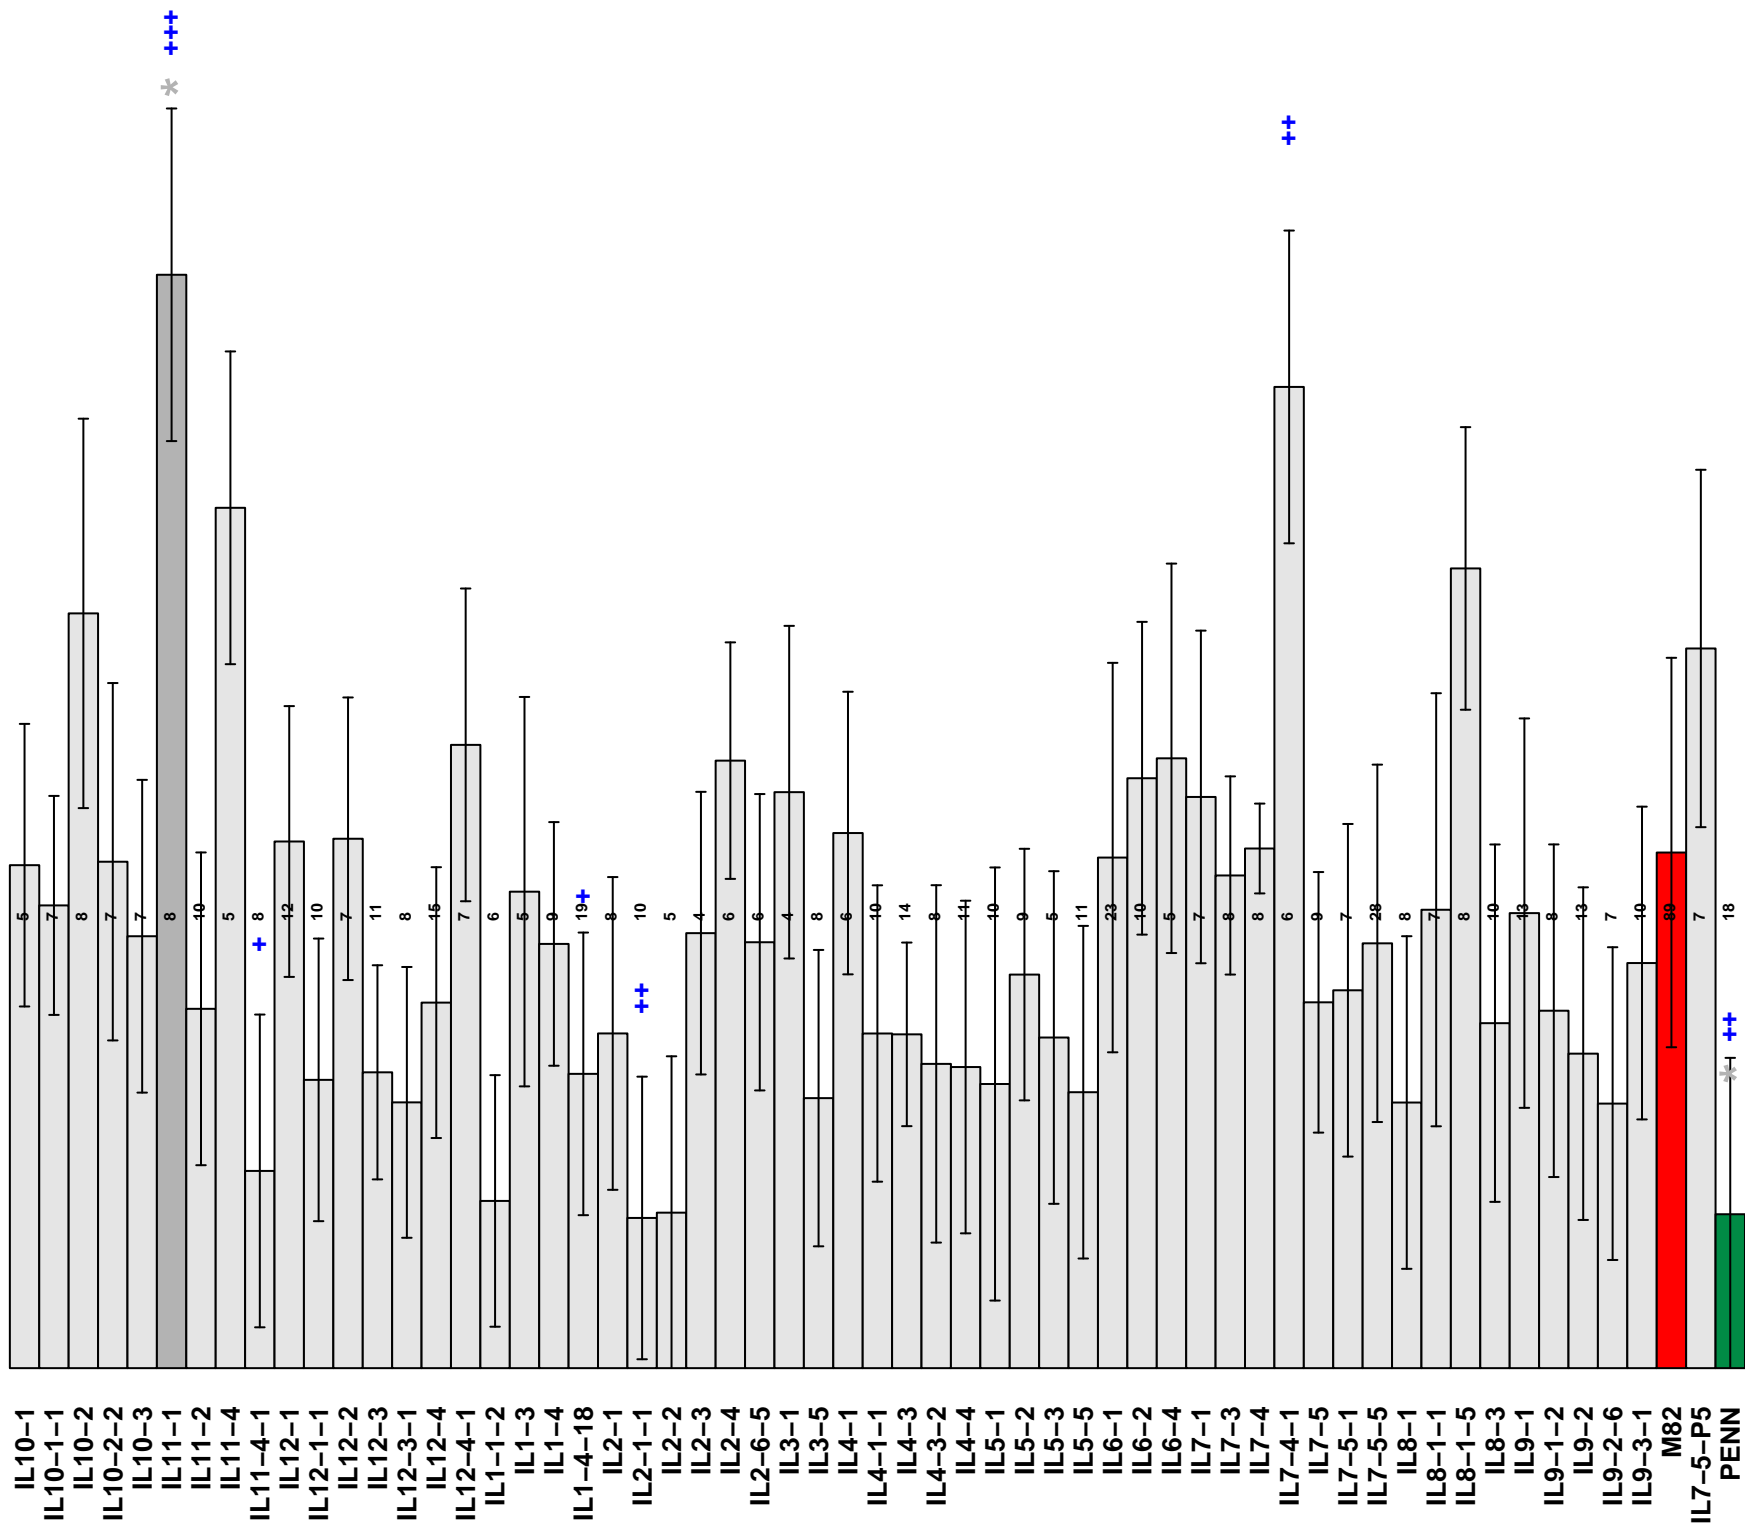



# Angle Rate T16

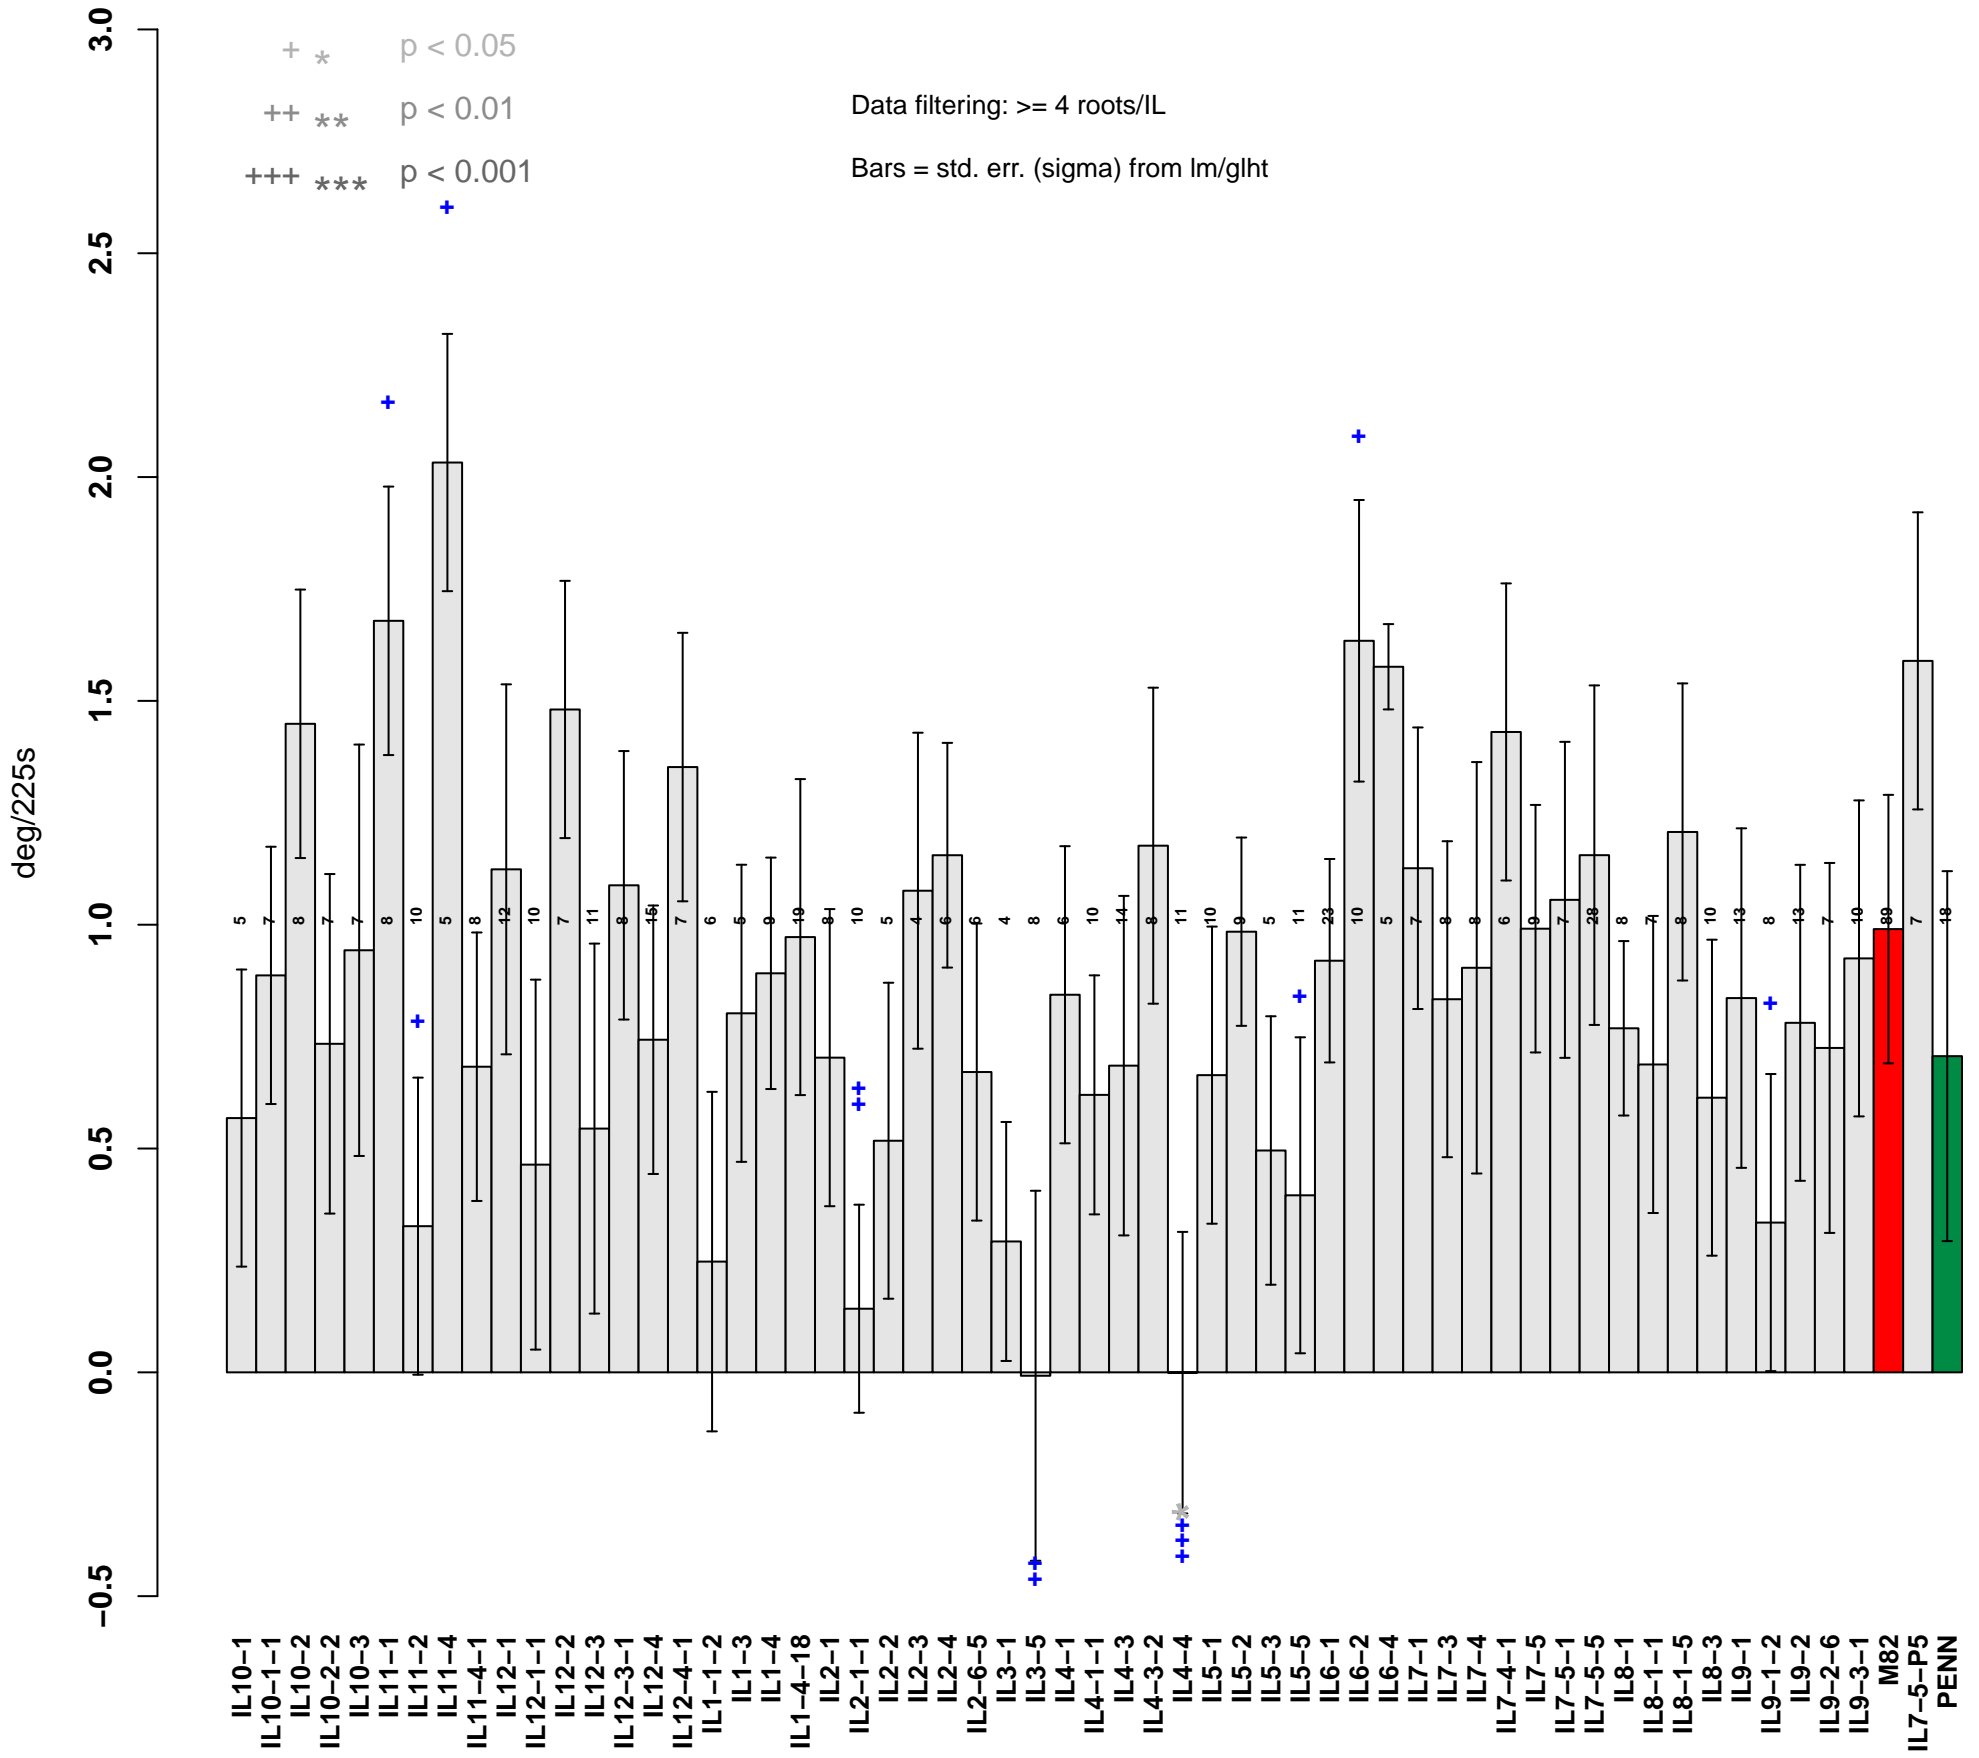

# Angle Rate T17

deg/225s

+ \* p < 0.05  
 ++ \*\* p < 0.01  
 +++ \*\*\* p < 0.001

Data filtering: >= 4 roots/IL

Bars = std. err. (sigma) from lm/glht

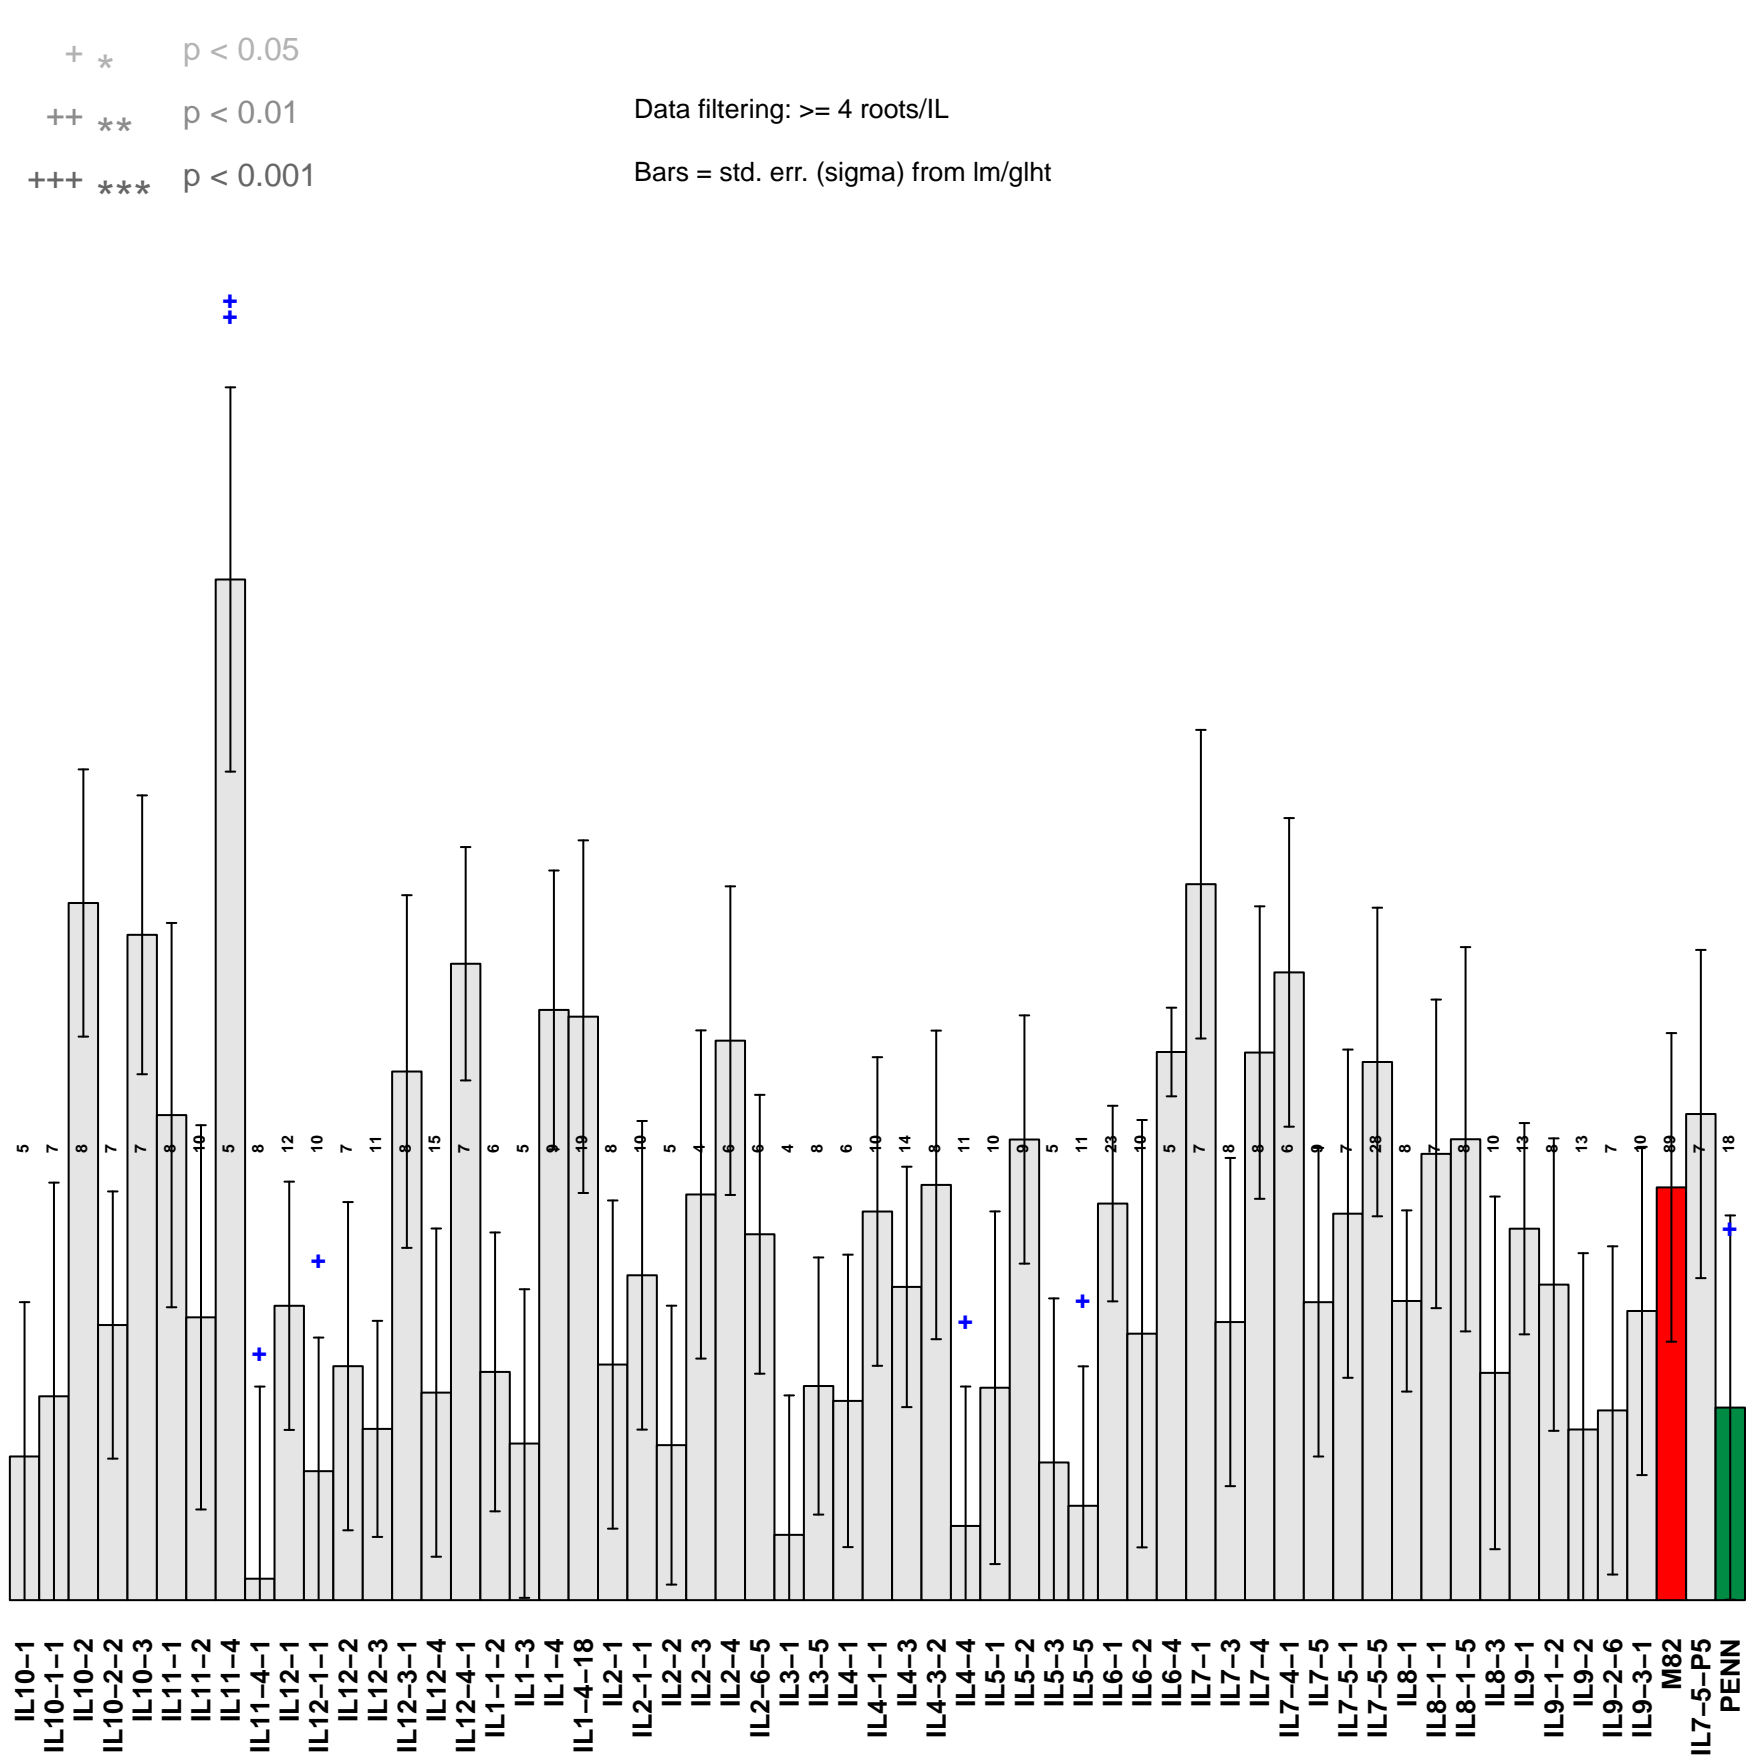

# Angle Rate T18

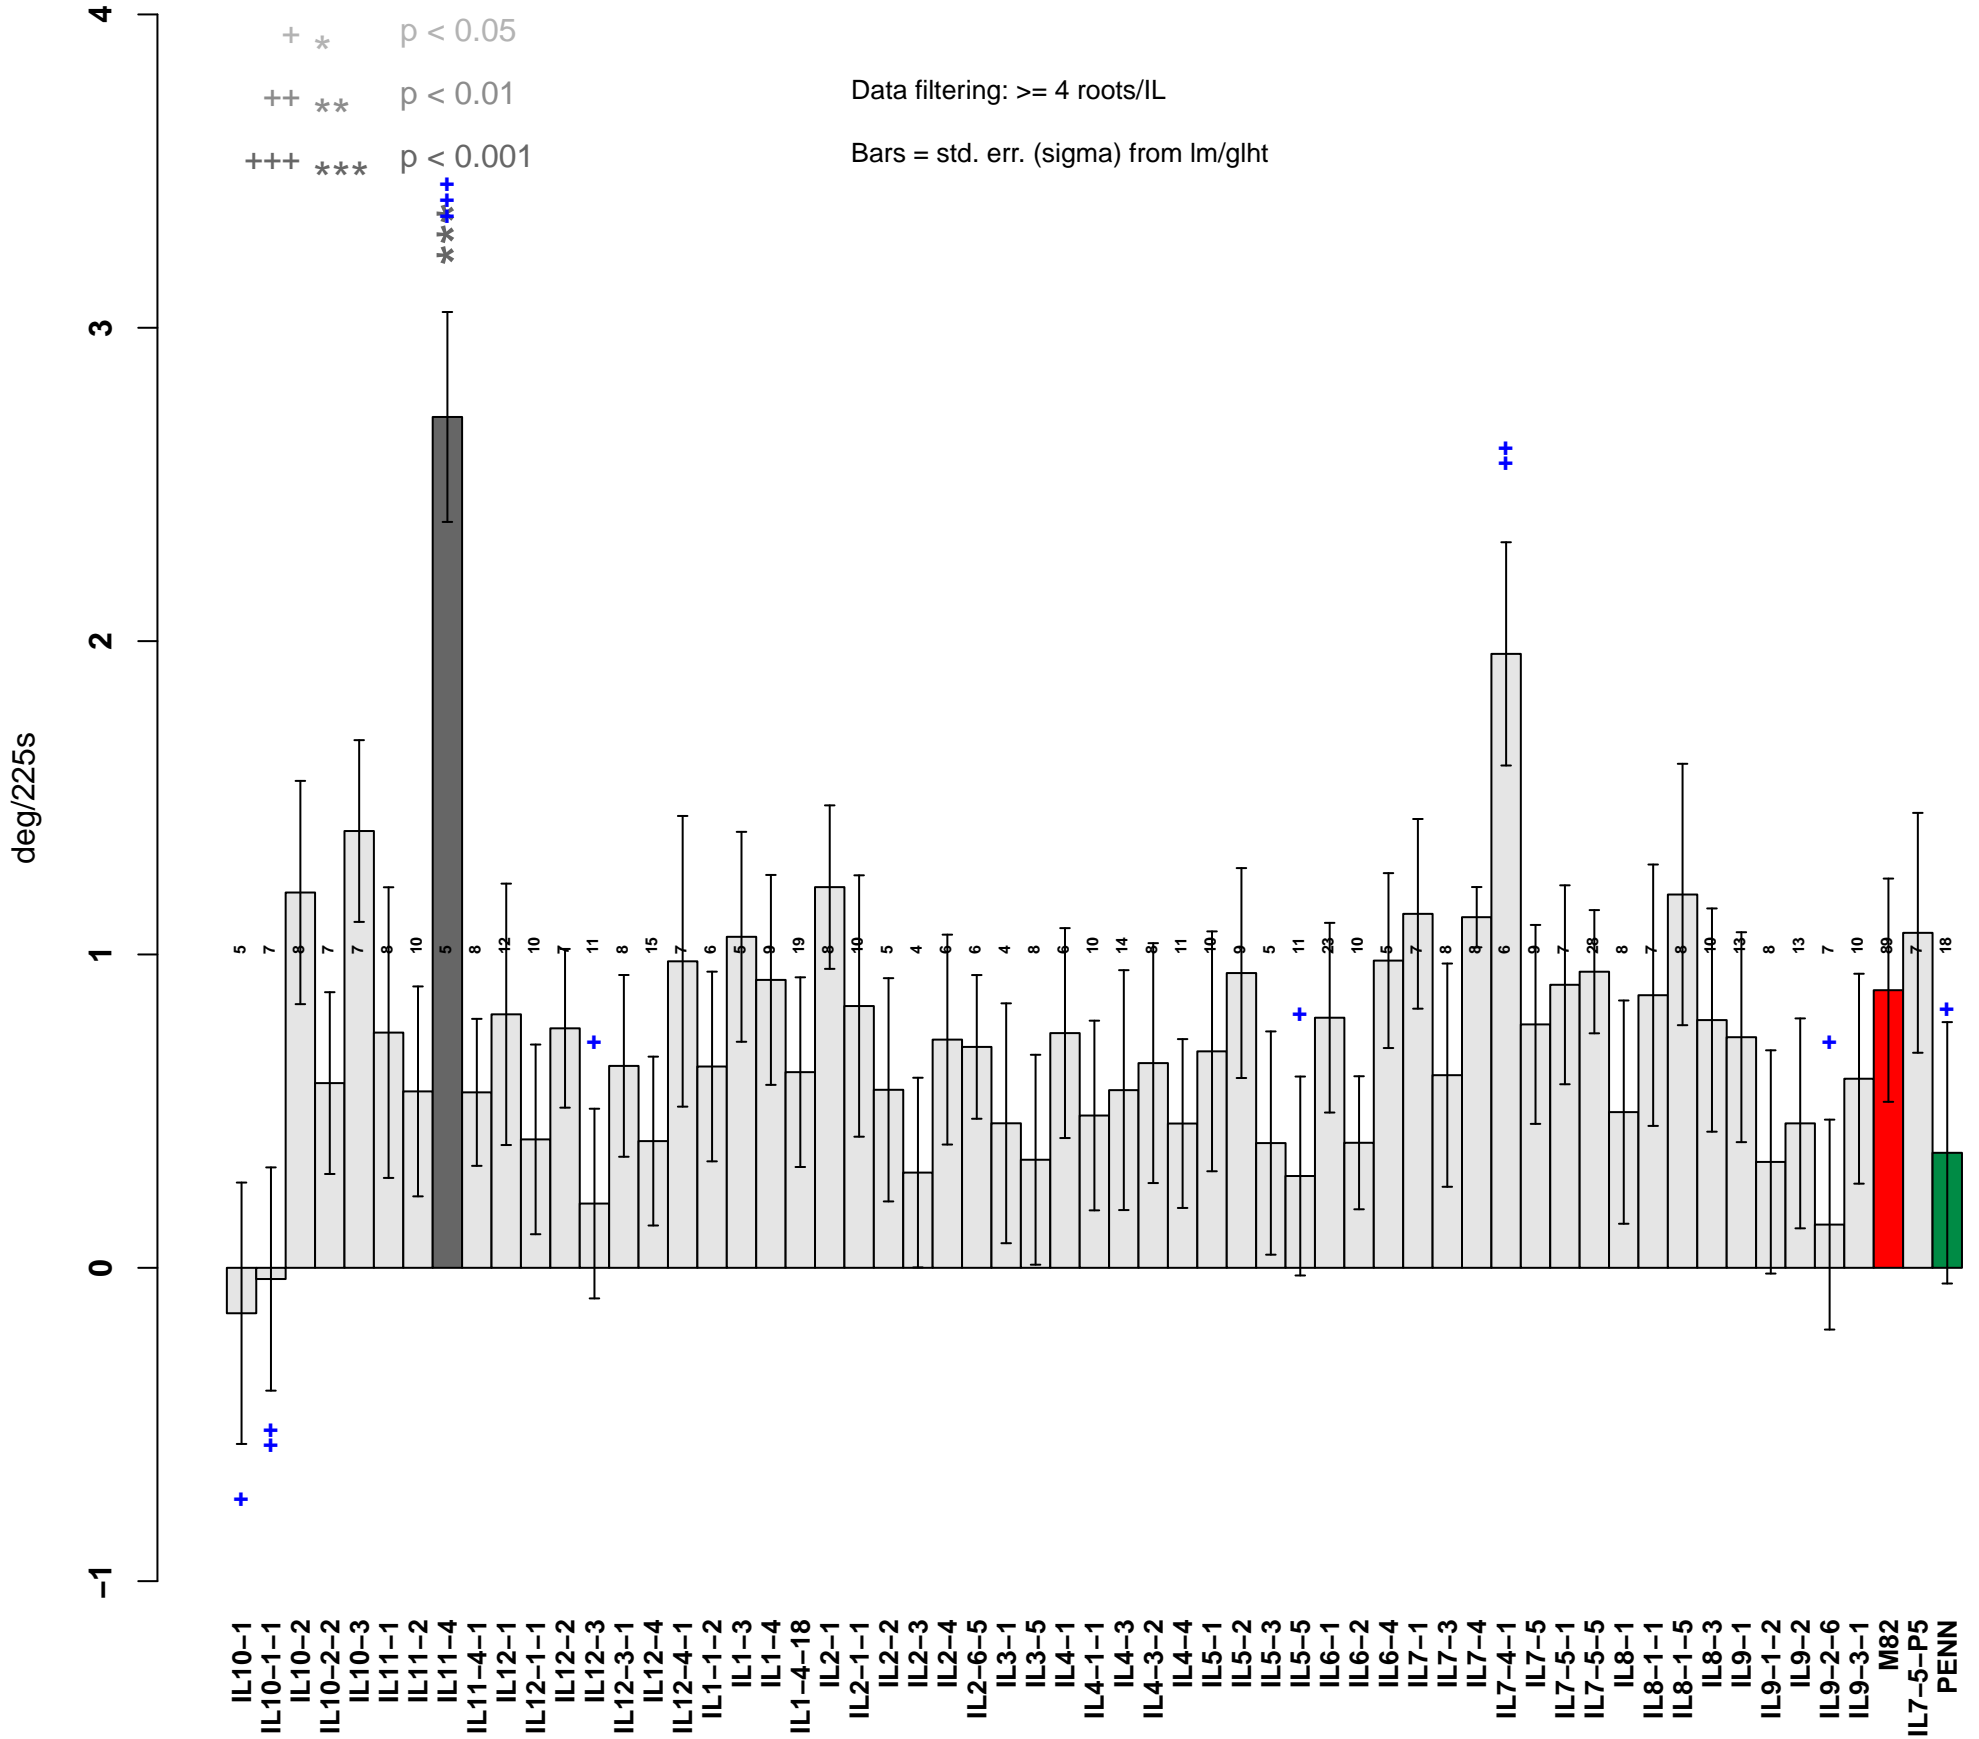

# Angle Rate T19

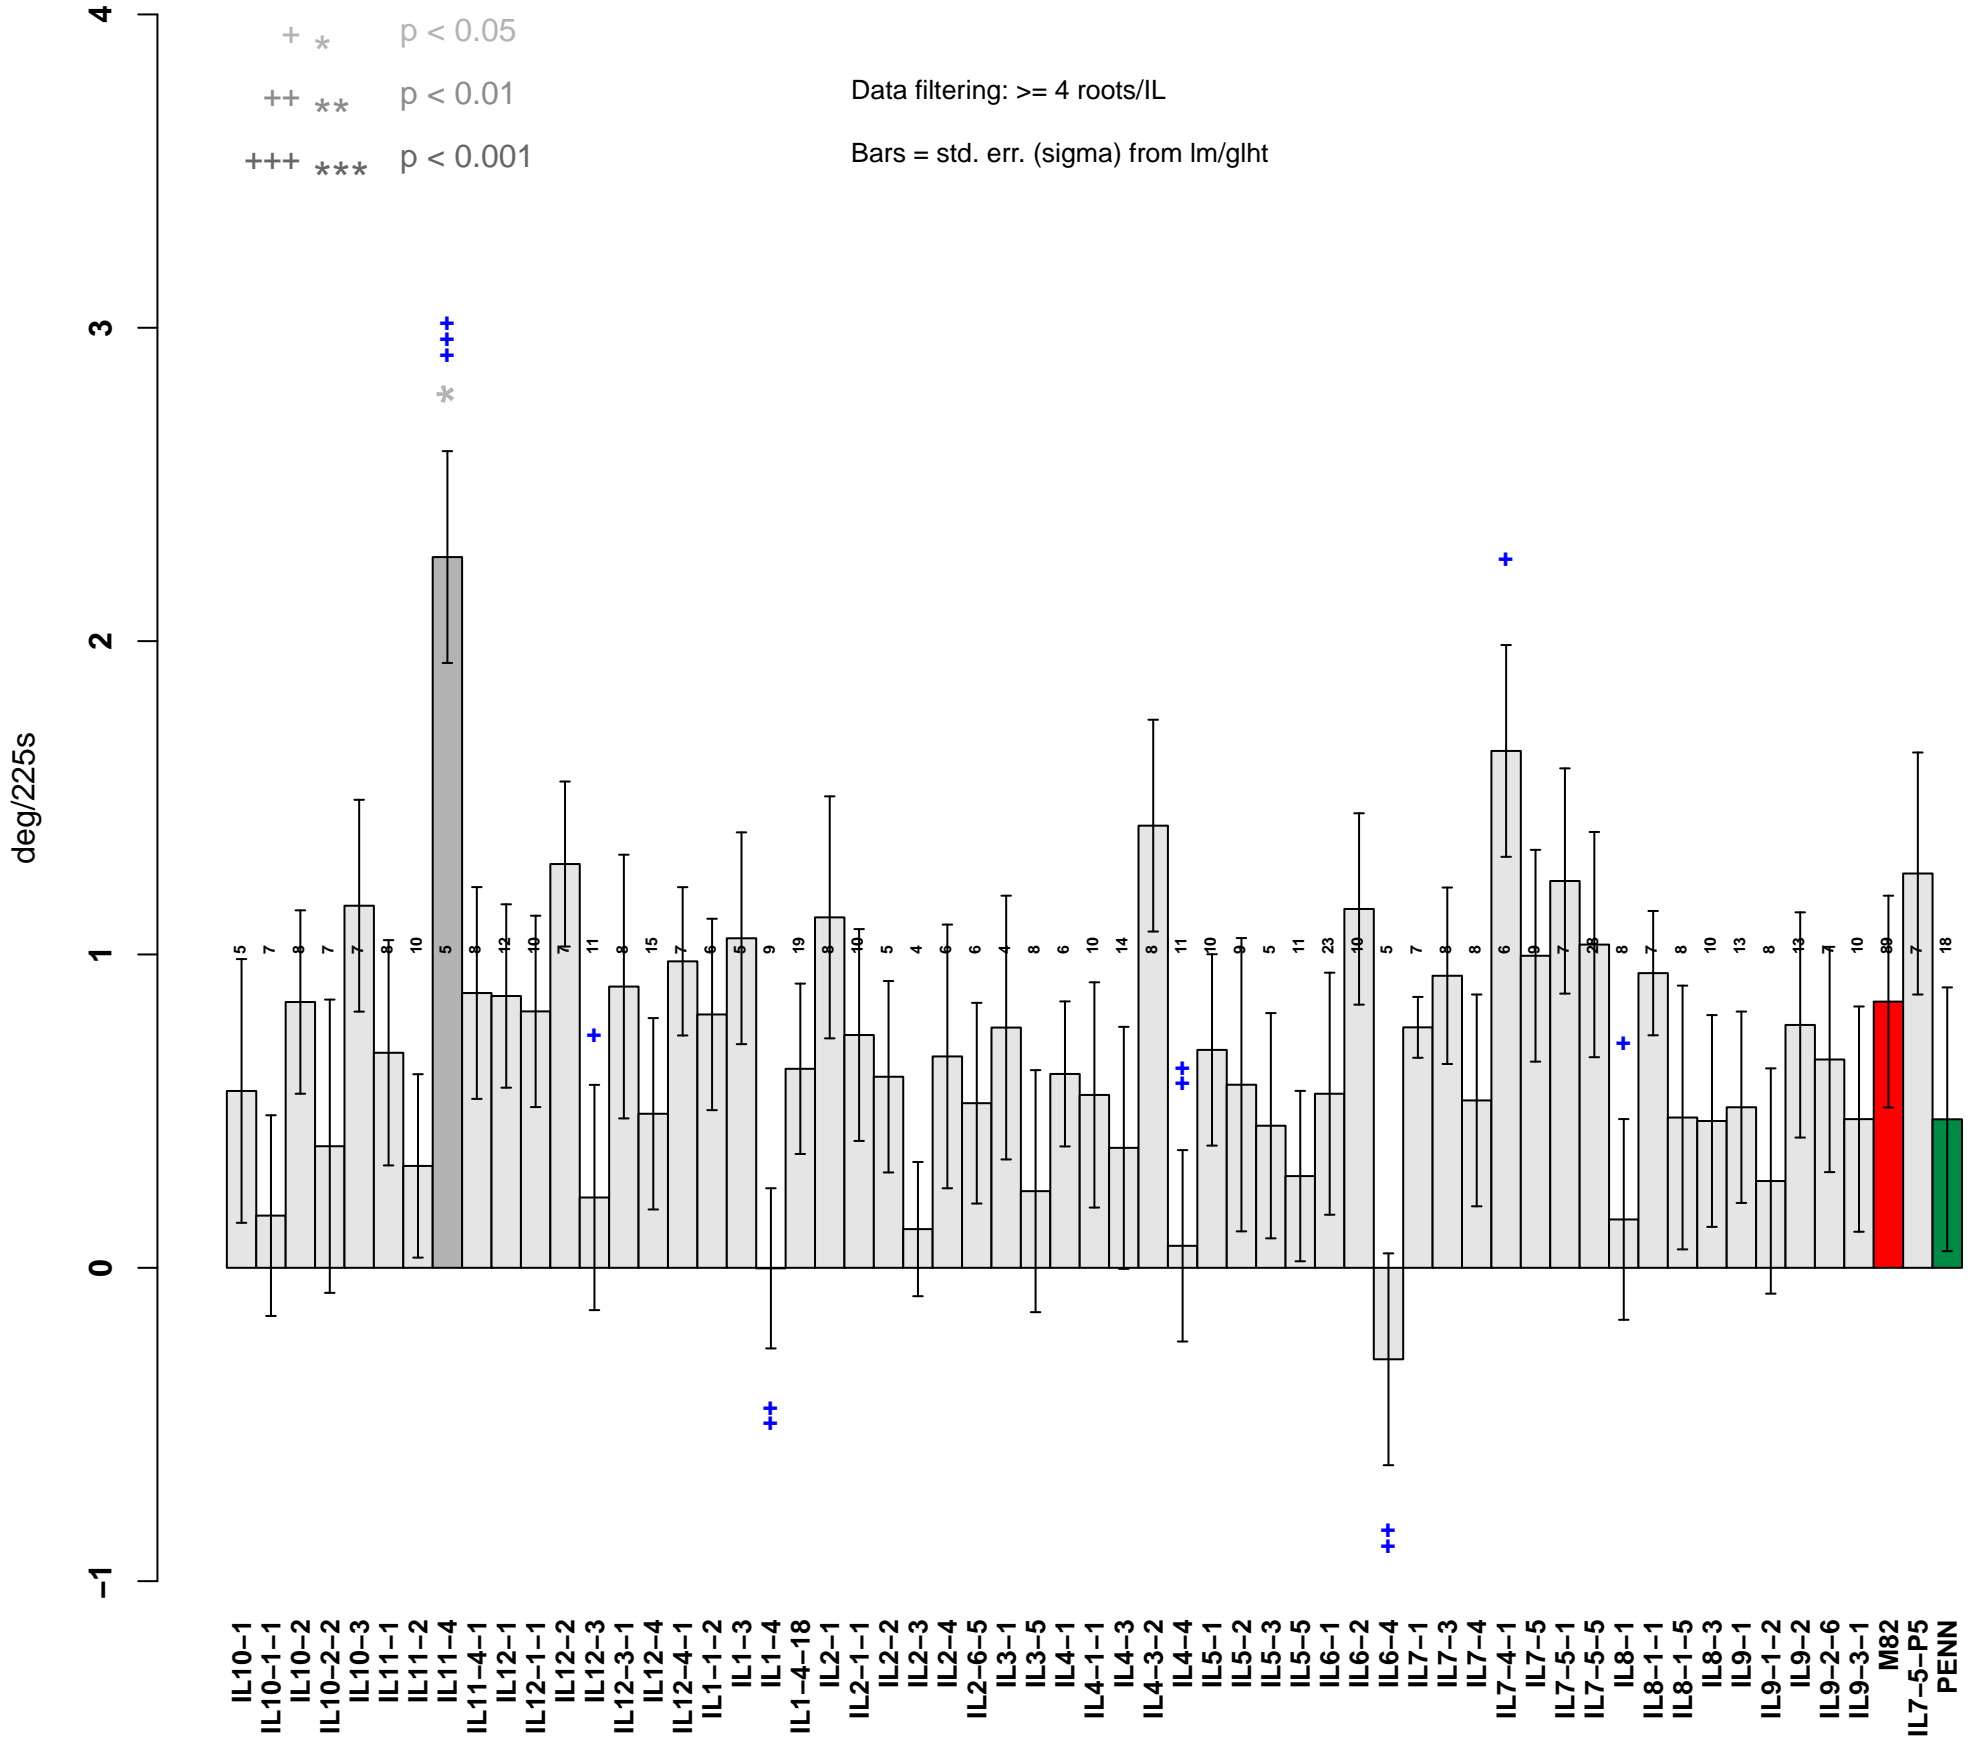

# Angle Rate T20

deg/225s

+ \*  $p < 0.05$   
 ++ \*\*  $p < 0.01$   
 +++ \*\*\*  $p < 0.001$

Data filtering:  $\geq 4$  roots/IL

Bars = std. err. (sigma) from lm/glht

2.5  
2.0  
1.5  
1.0  
0.5  
0.0  
-0.5

IL10-1  
IL10-1-1  
IL10-2  
IL10-2-2  
IL10-3  
IL11-1  
IL11-2  
IL11-4  
IL11-4-1  
IL12-1  
IL12-1-1  
IL12-2  
IL12-3  
IL12-3-1  
IL12-4  
IL12-4-1  
IL1-1-2  
IL1-3  
IL1-4  
IL1-4-18  
IL2-1  
IL2-1-1  
IL2-2  
IL2-3  
IL2-4  
IL2-6-5  
IL3-1  
IL3-5  
IL4-1  
IL4-1-1  
IL4-3  
IL4-3-2  
IL4-4  
IL5-1  
IL5-2  
IL5-3  
IL5-5  
IL6-1  
IL6-2  
IL6-4  
IL7-1  
IL7-3  
IL7-4  
IL7-4-1  
IL7-5  
IL7-5-1  
IL7-5-5  
IL8-1  
IL8-1-1  
IL8-1-5  
IL8-3  
IL9-1  
IL9-1-2  
IL9-2  
IL9-2-6  
IL9-3-1  
M82  
IL7-5-P5  
PENN

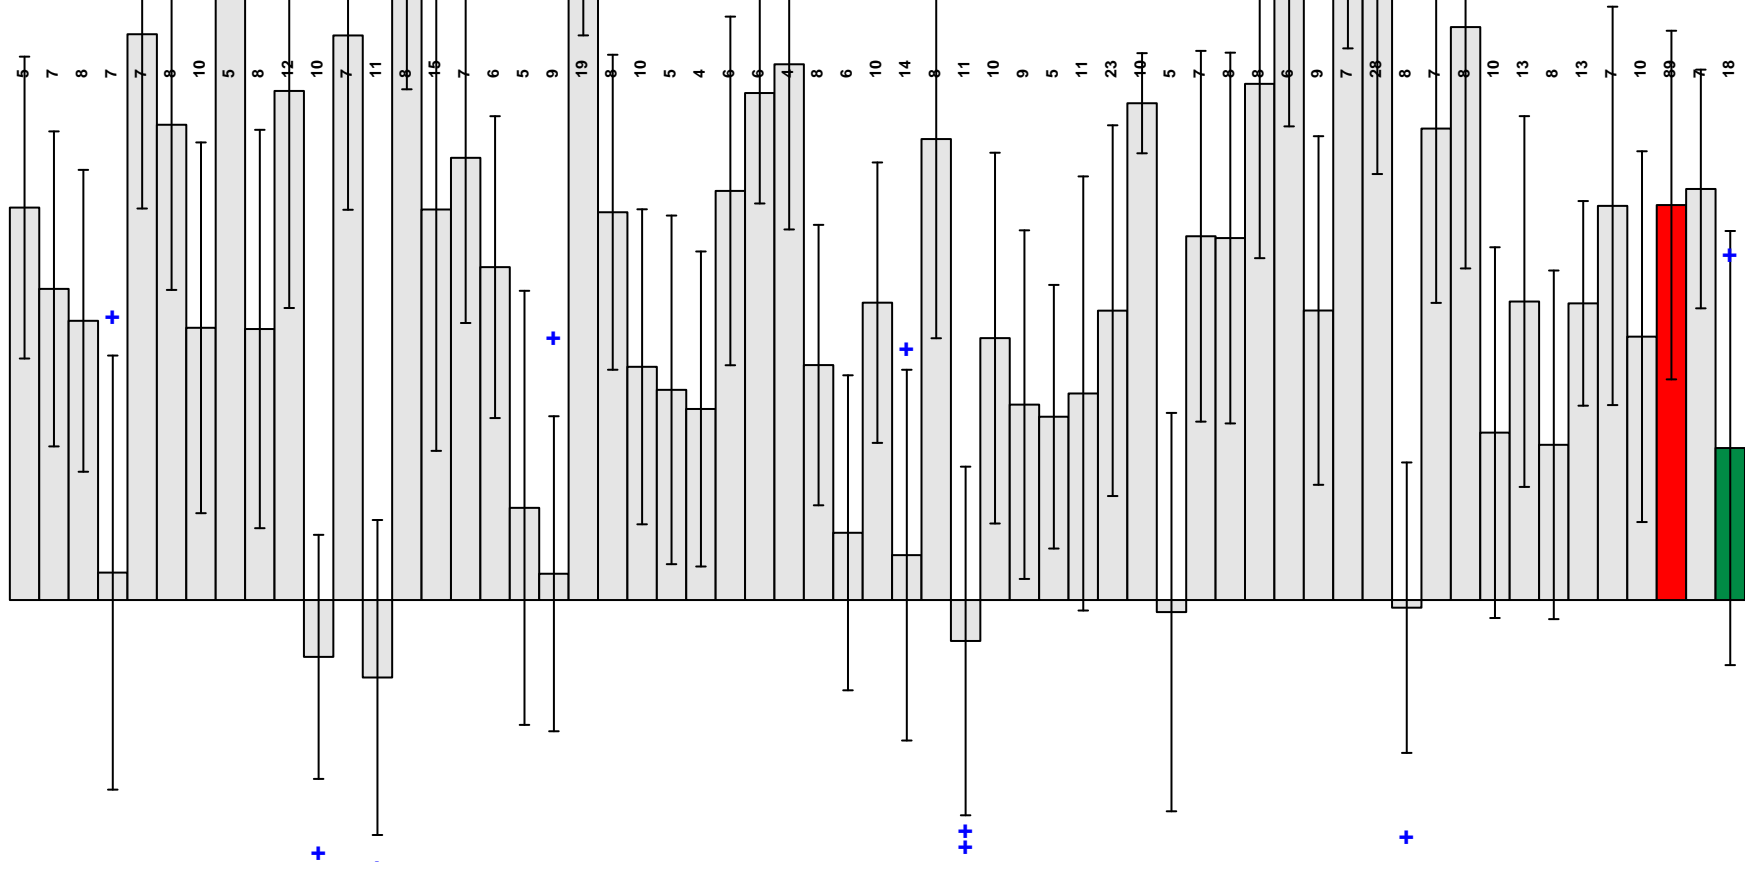

# Angle Rate T21

deg/225s

-1 0 1 2 3

+ \* p < 0.05  
 ++ \*\* p < 0.01  
 +++ \*\*\* p < 0.001

Data filtering: >= 4 roots/IL

Bars = std. err. (sigma) from lm/glht

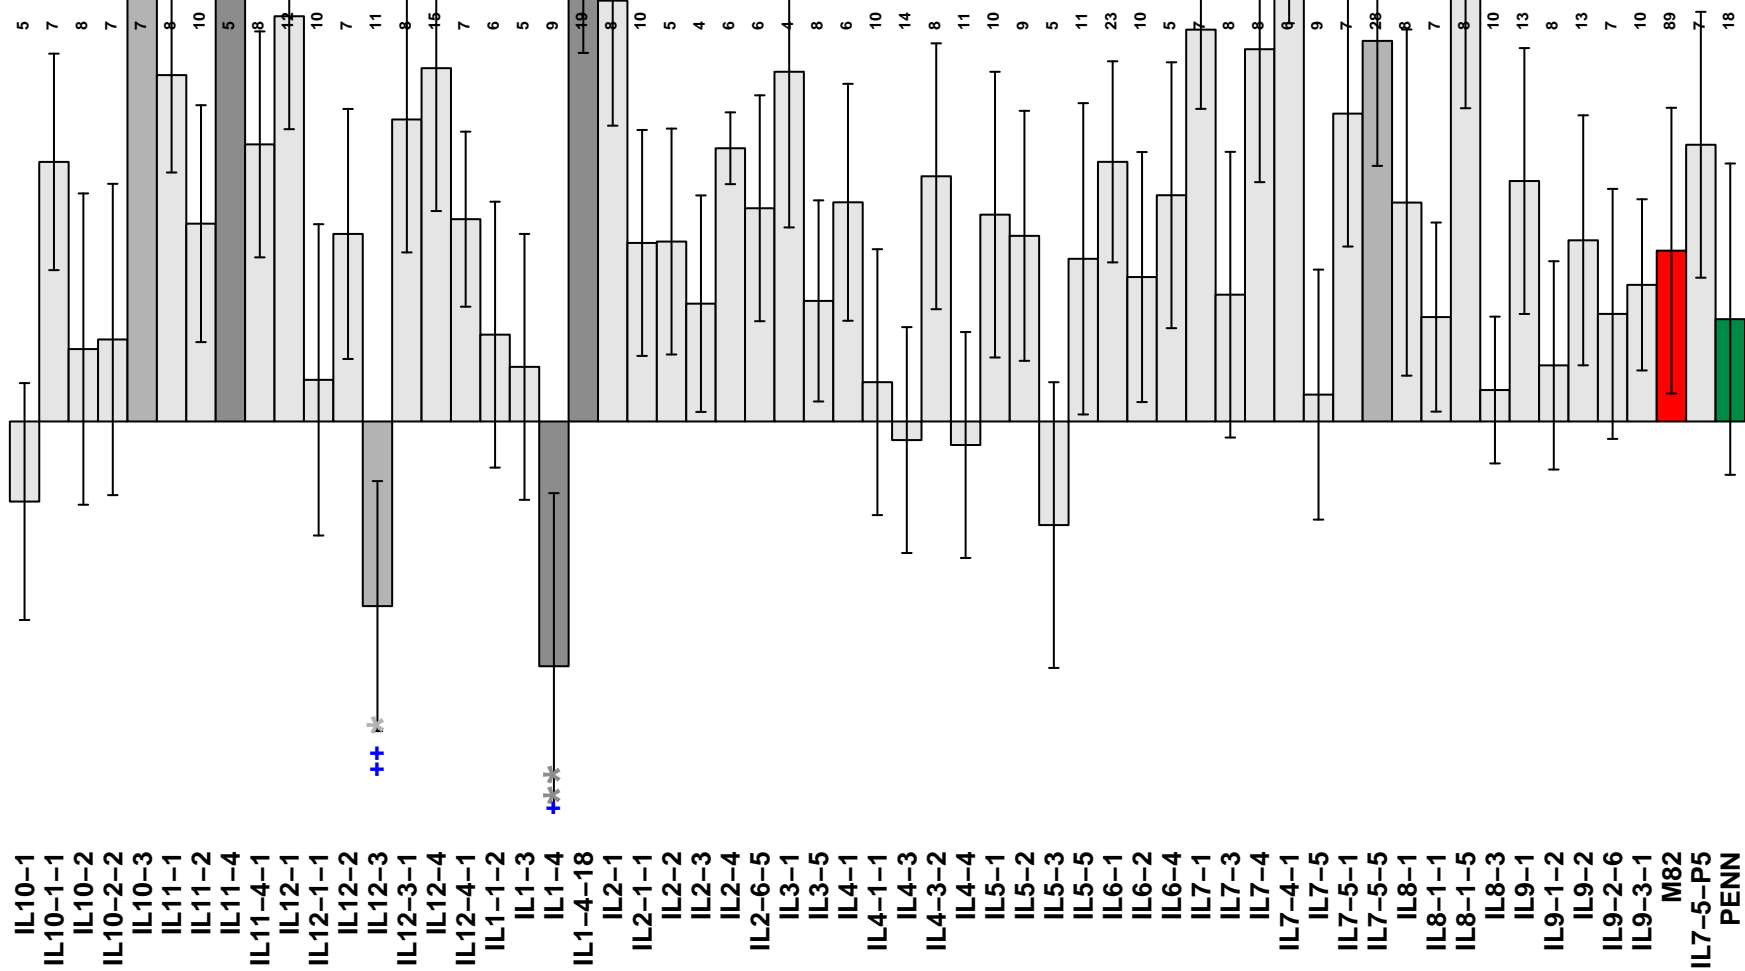

## Angle Rate T22

+ \* p < 0.05

++ \*\* p < 0.01

+++ \*\*\*  $p < 0.001$

Data filtering:  $\geq 4$  roots/IL

Bars = std. err. (sigma) from lm/glht

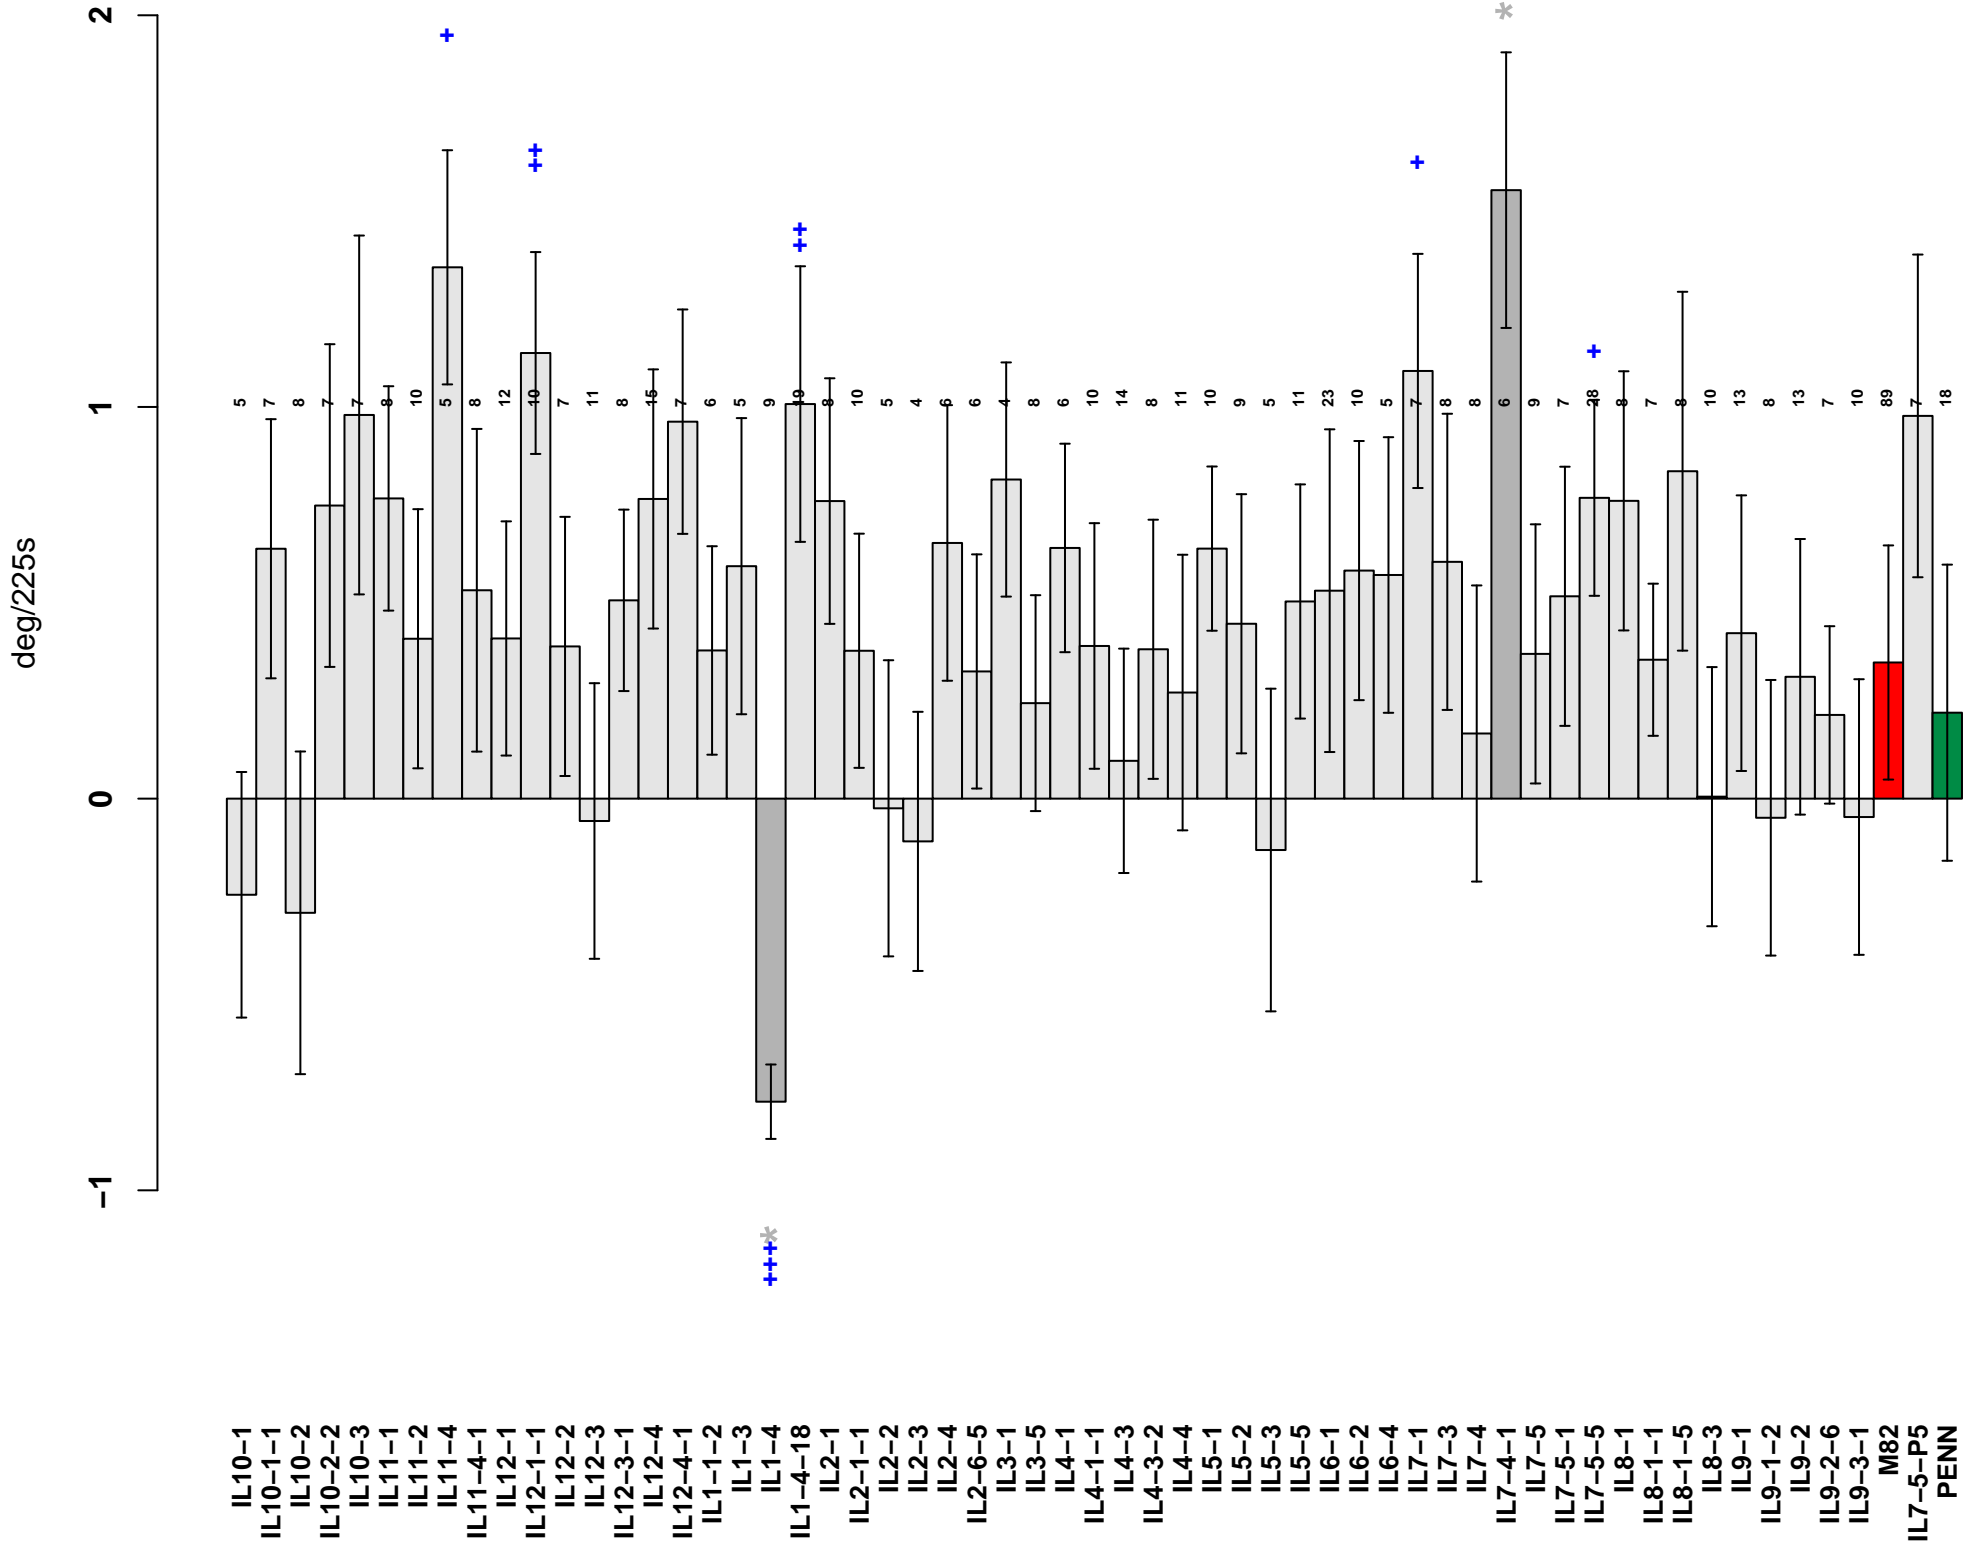

# Angle Rate T23

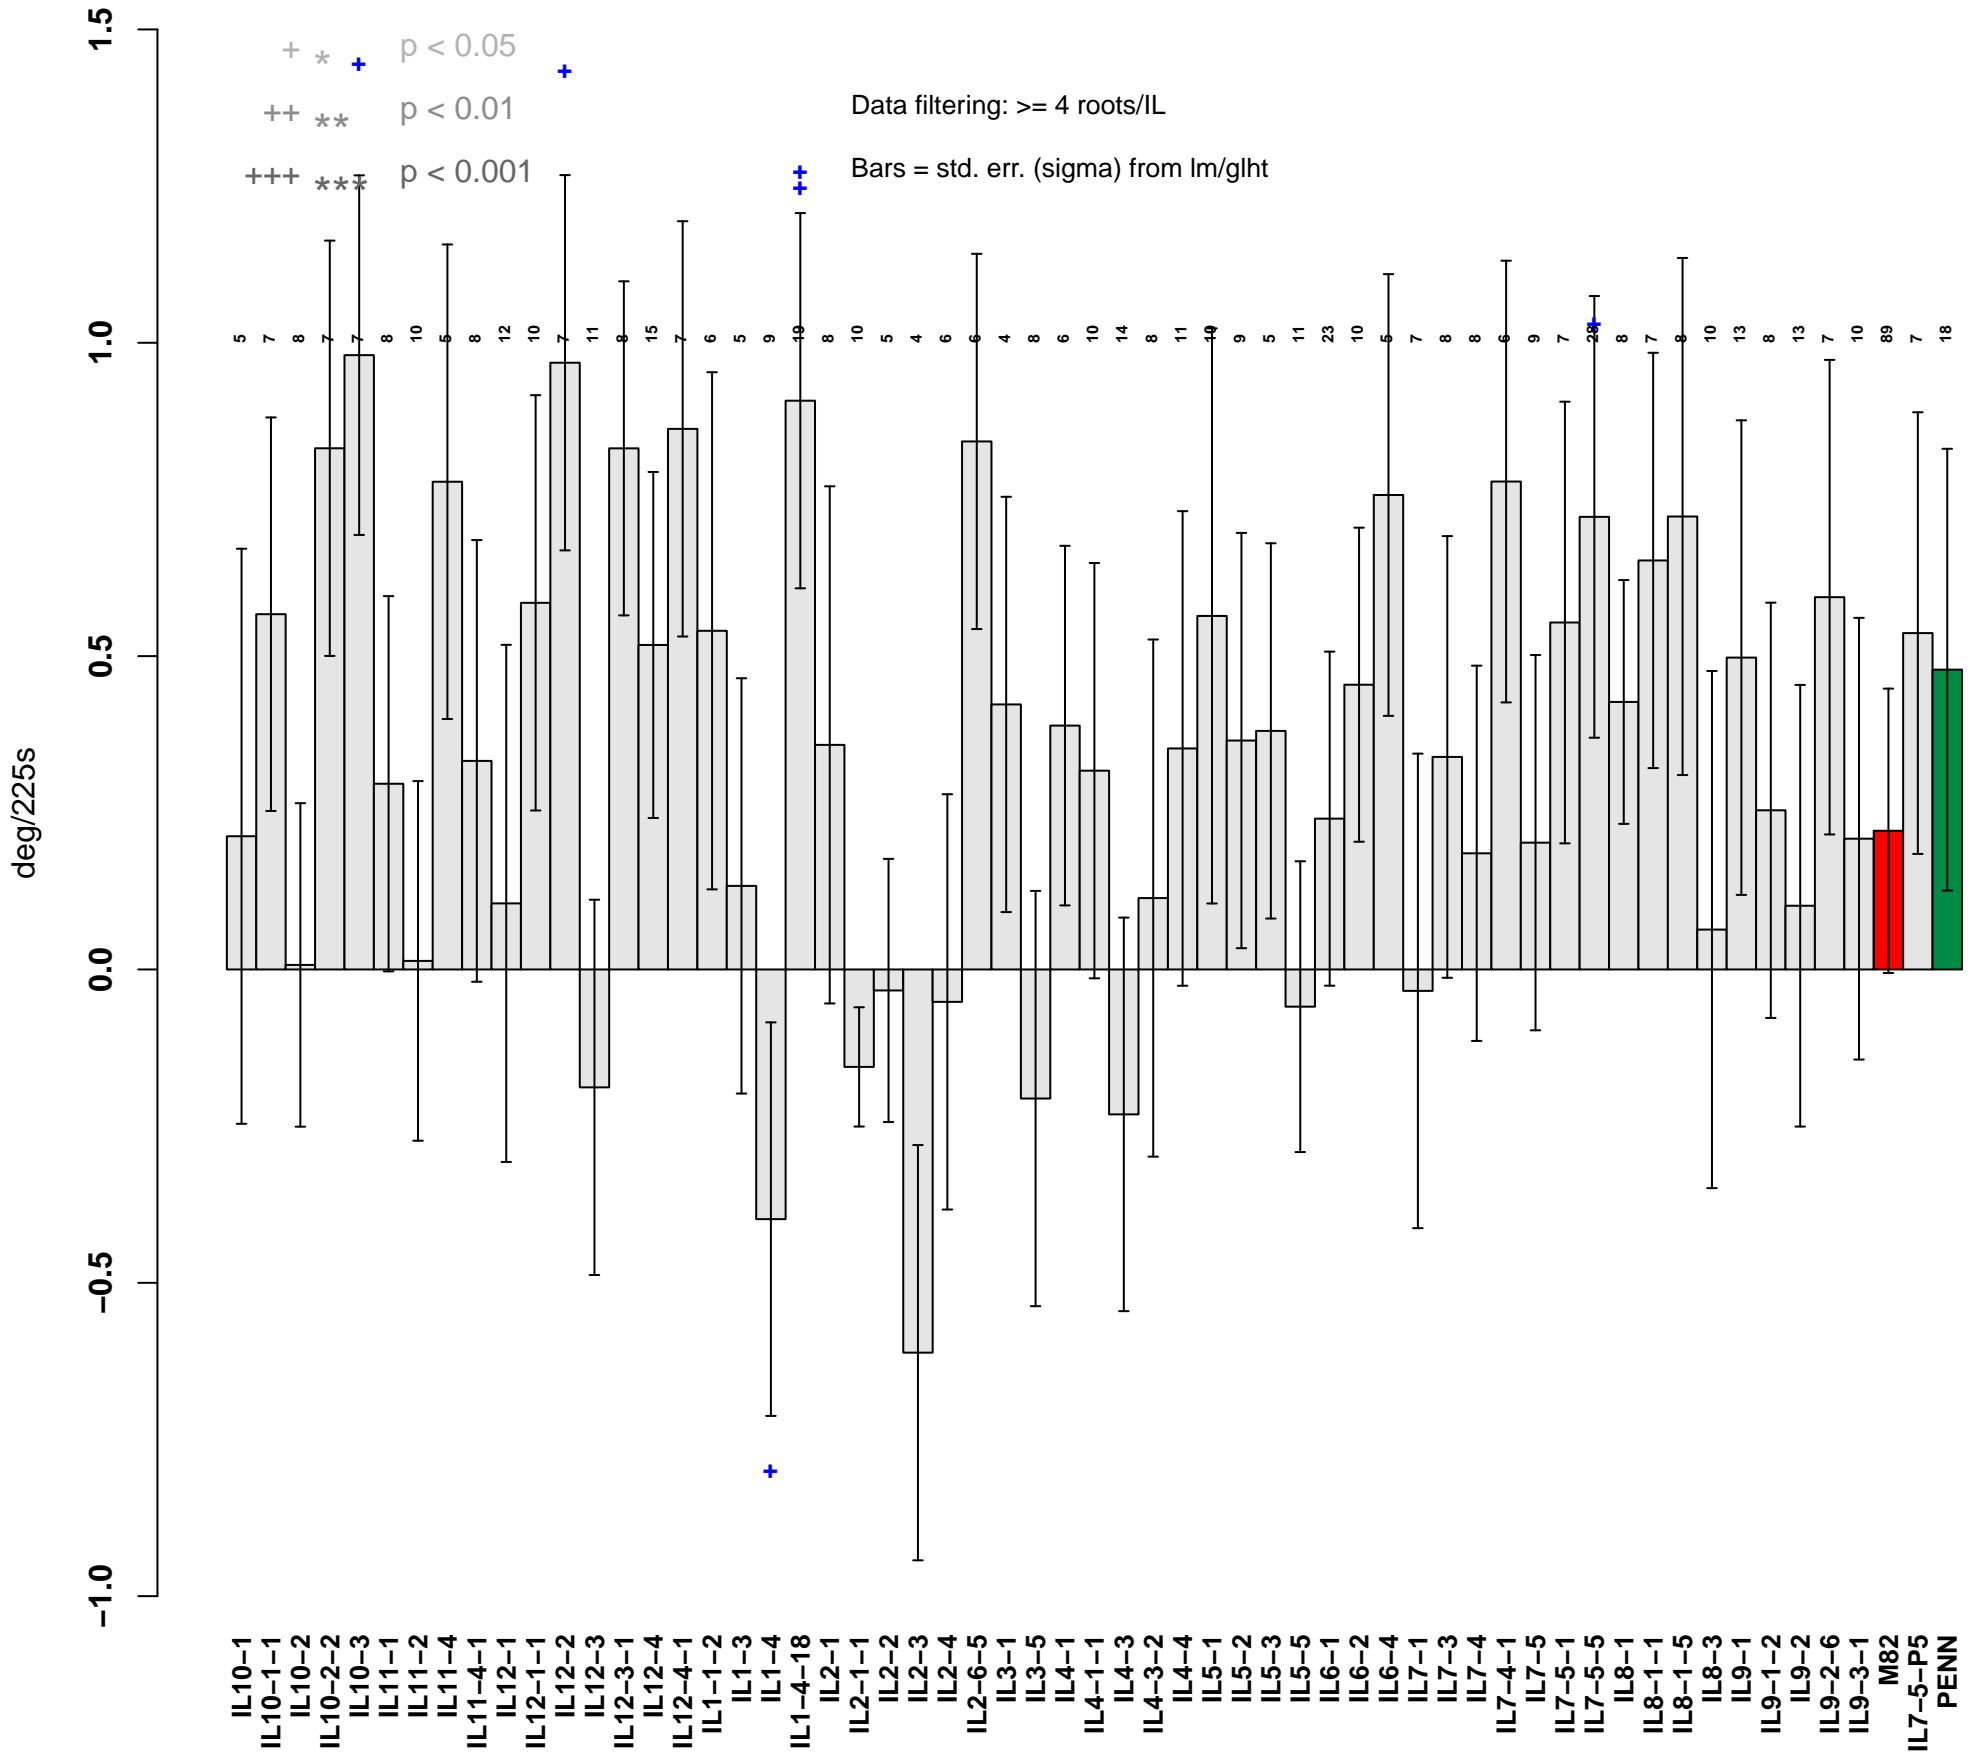



# Angle Rate T24

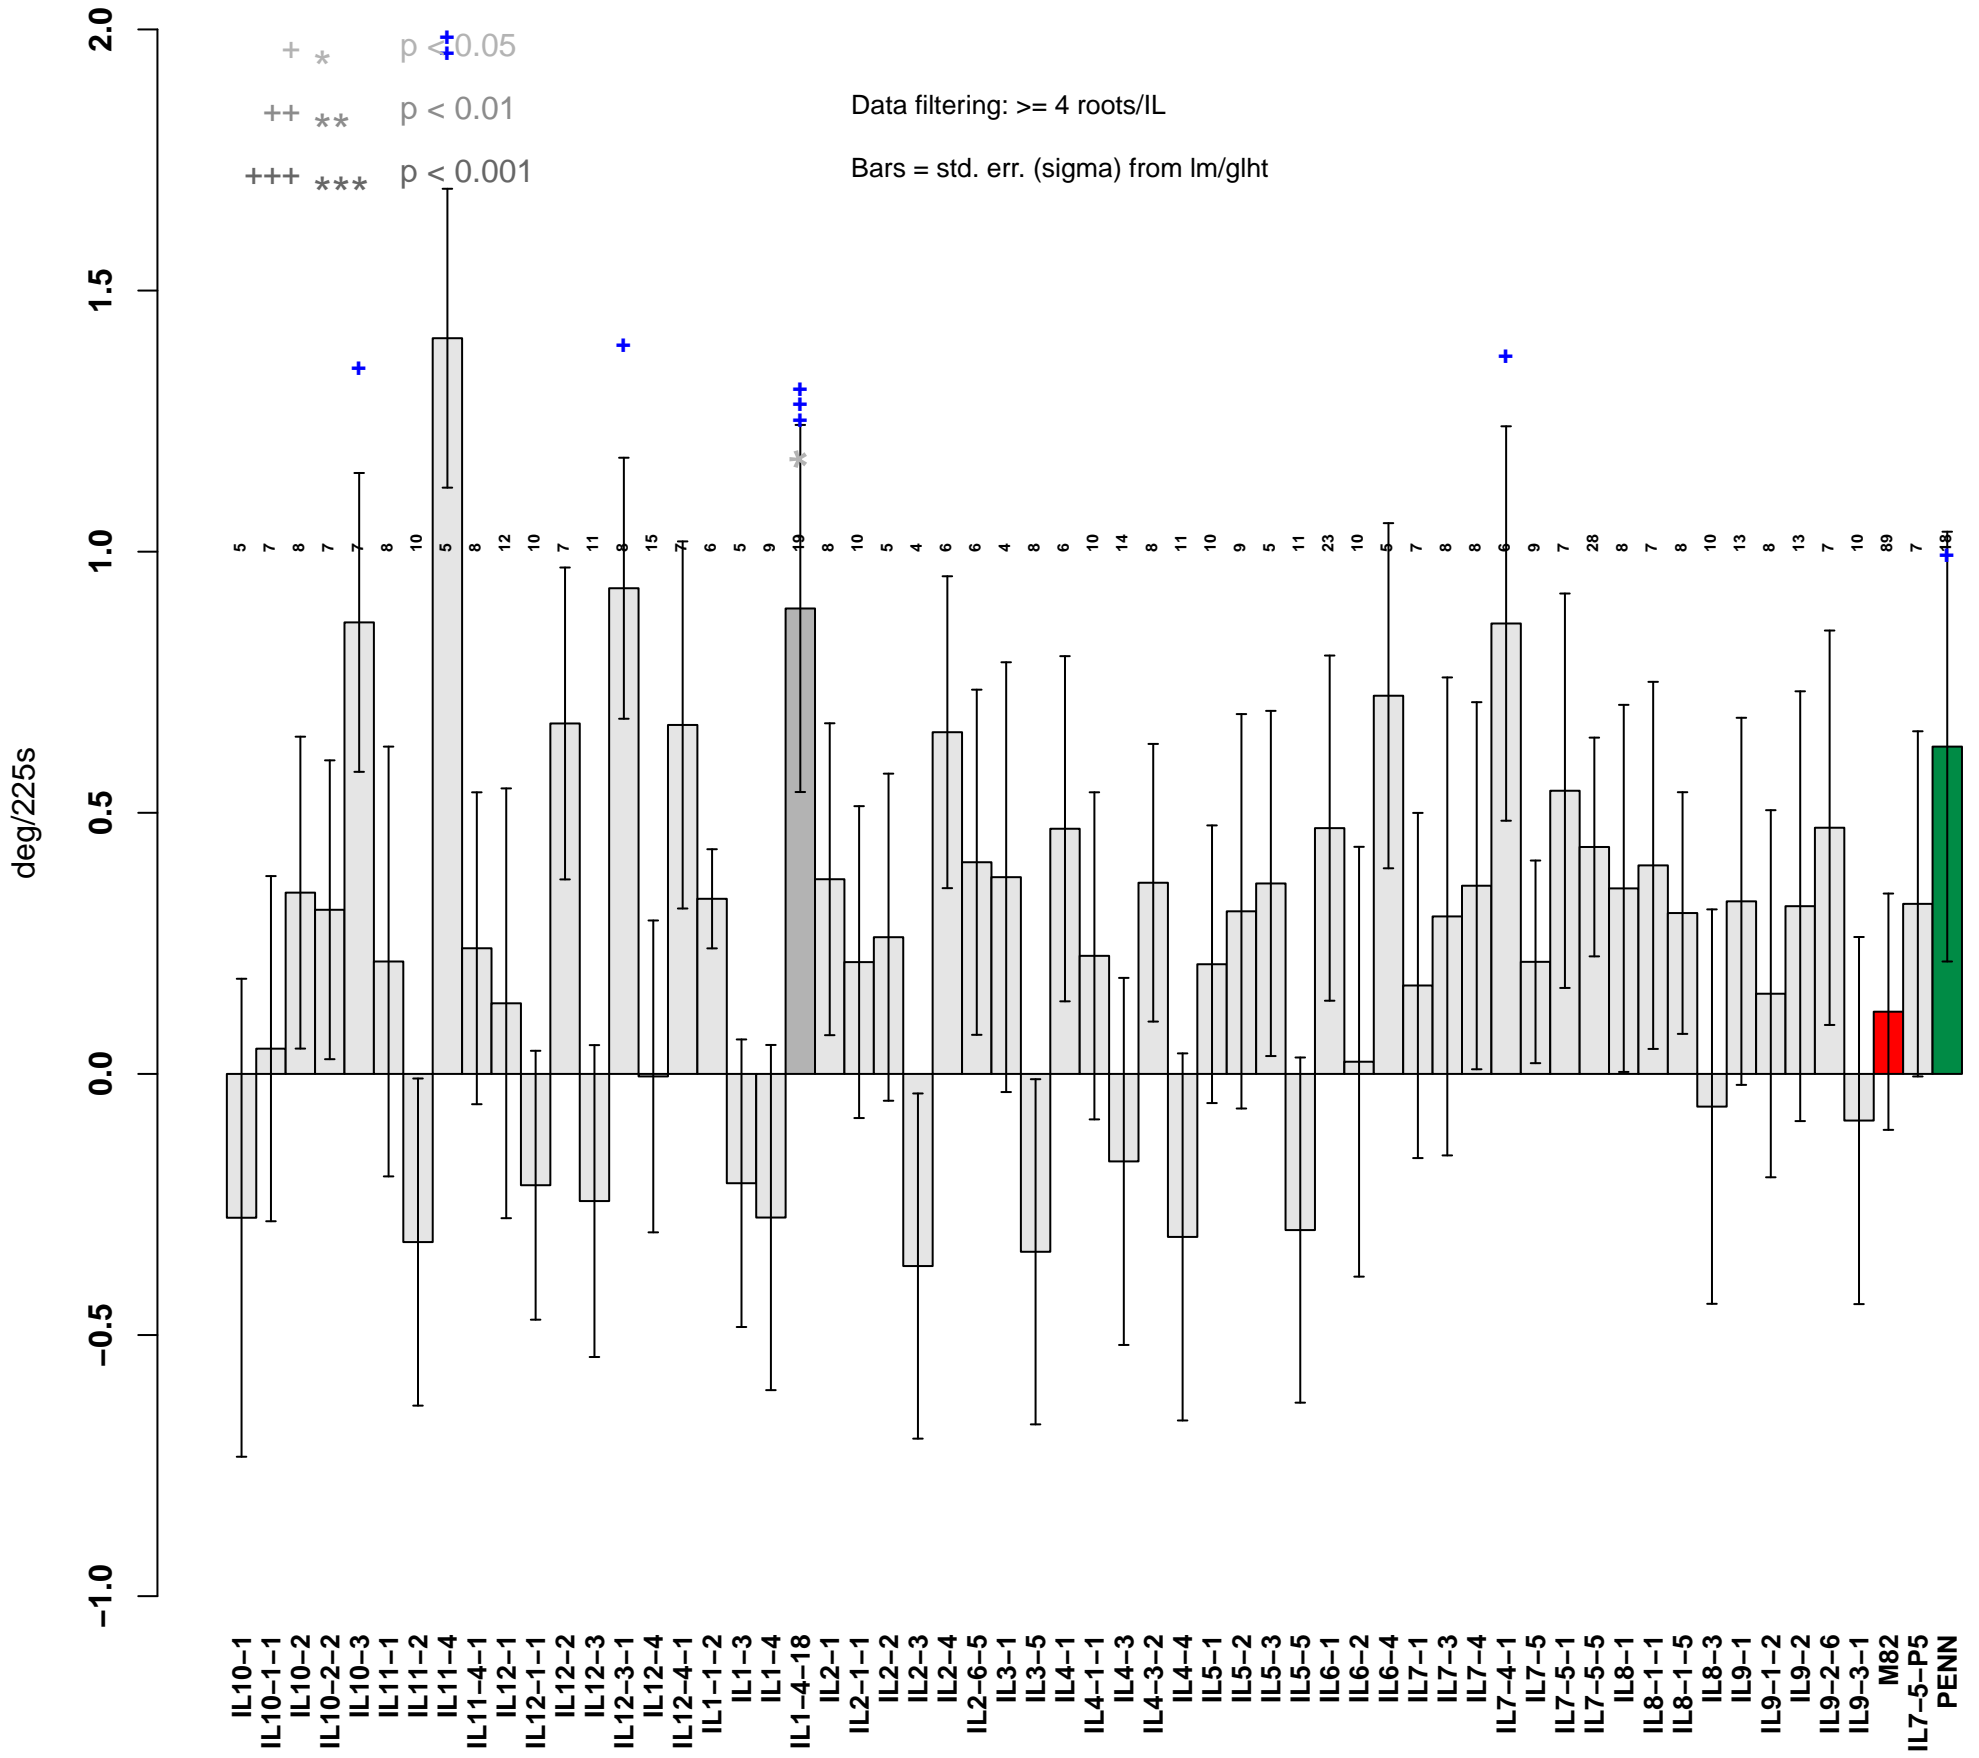

# Angle Rate T25

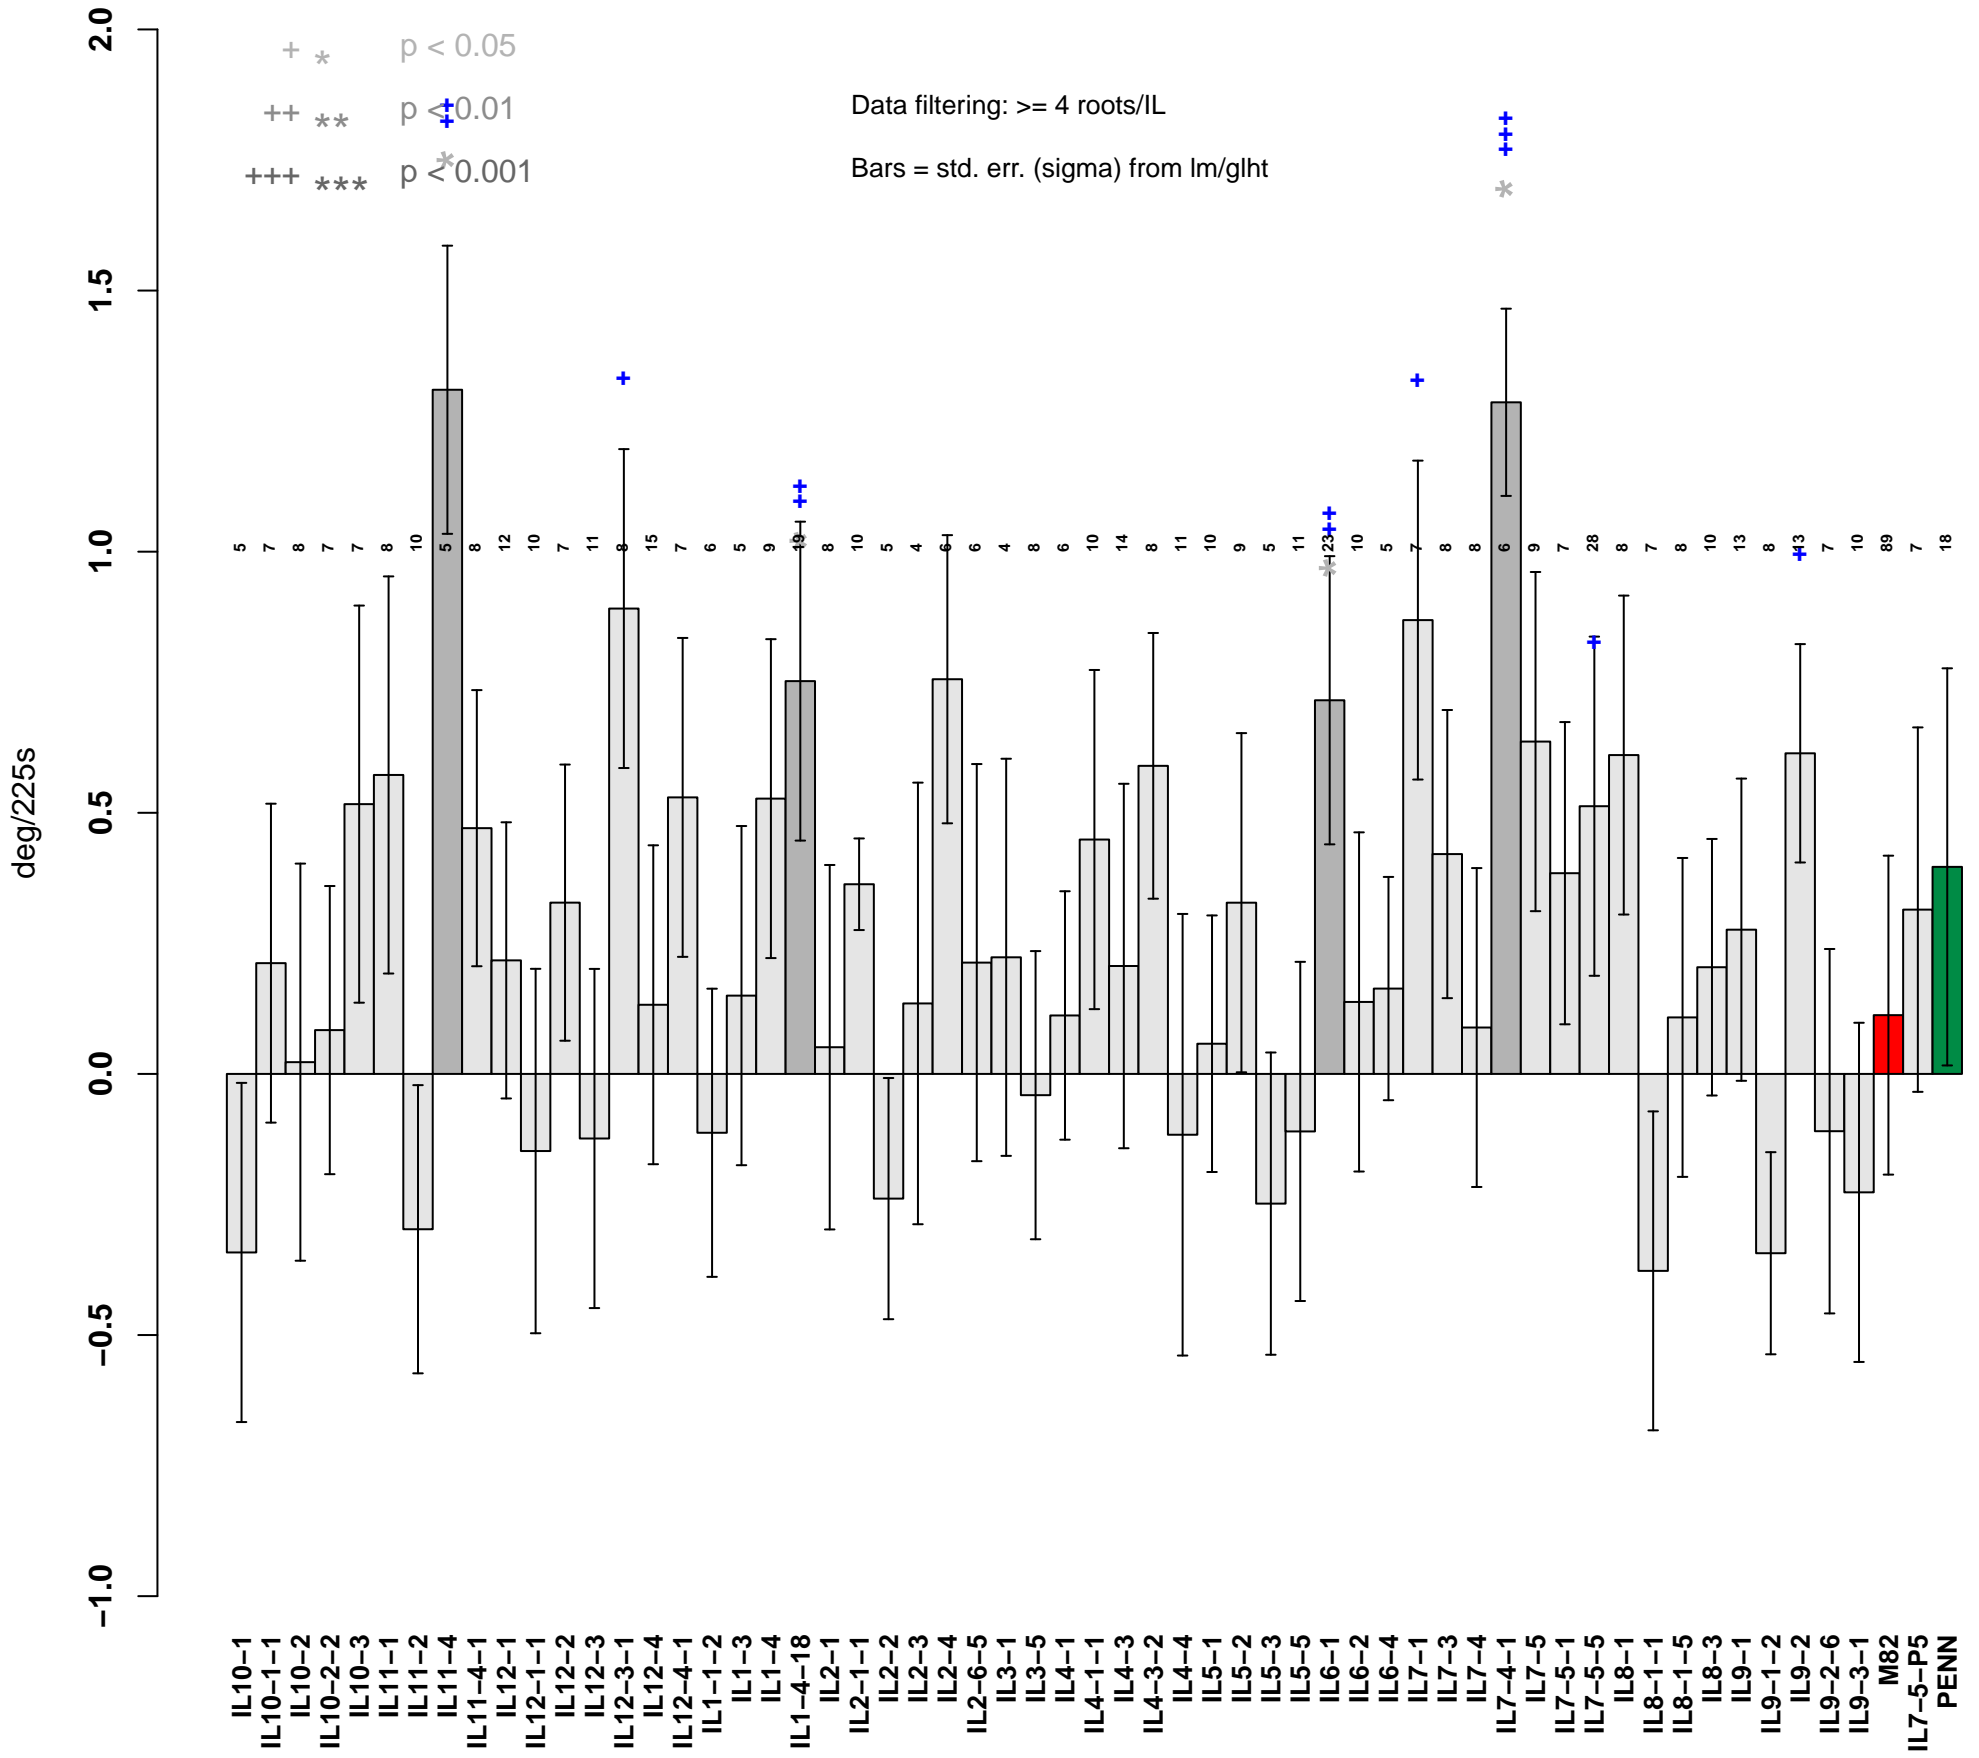

# Angle Rate T26

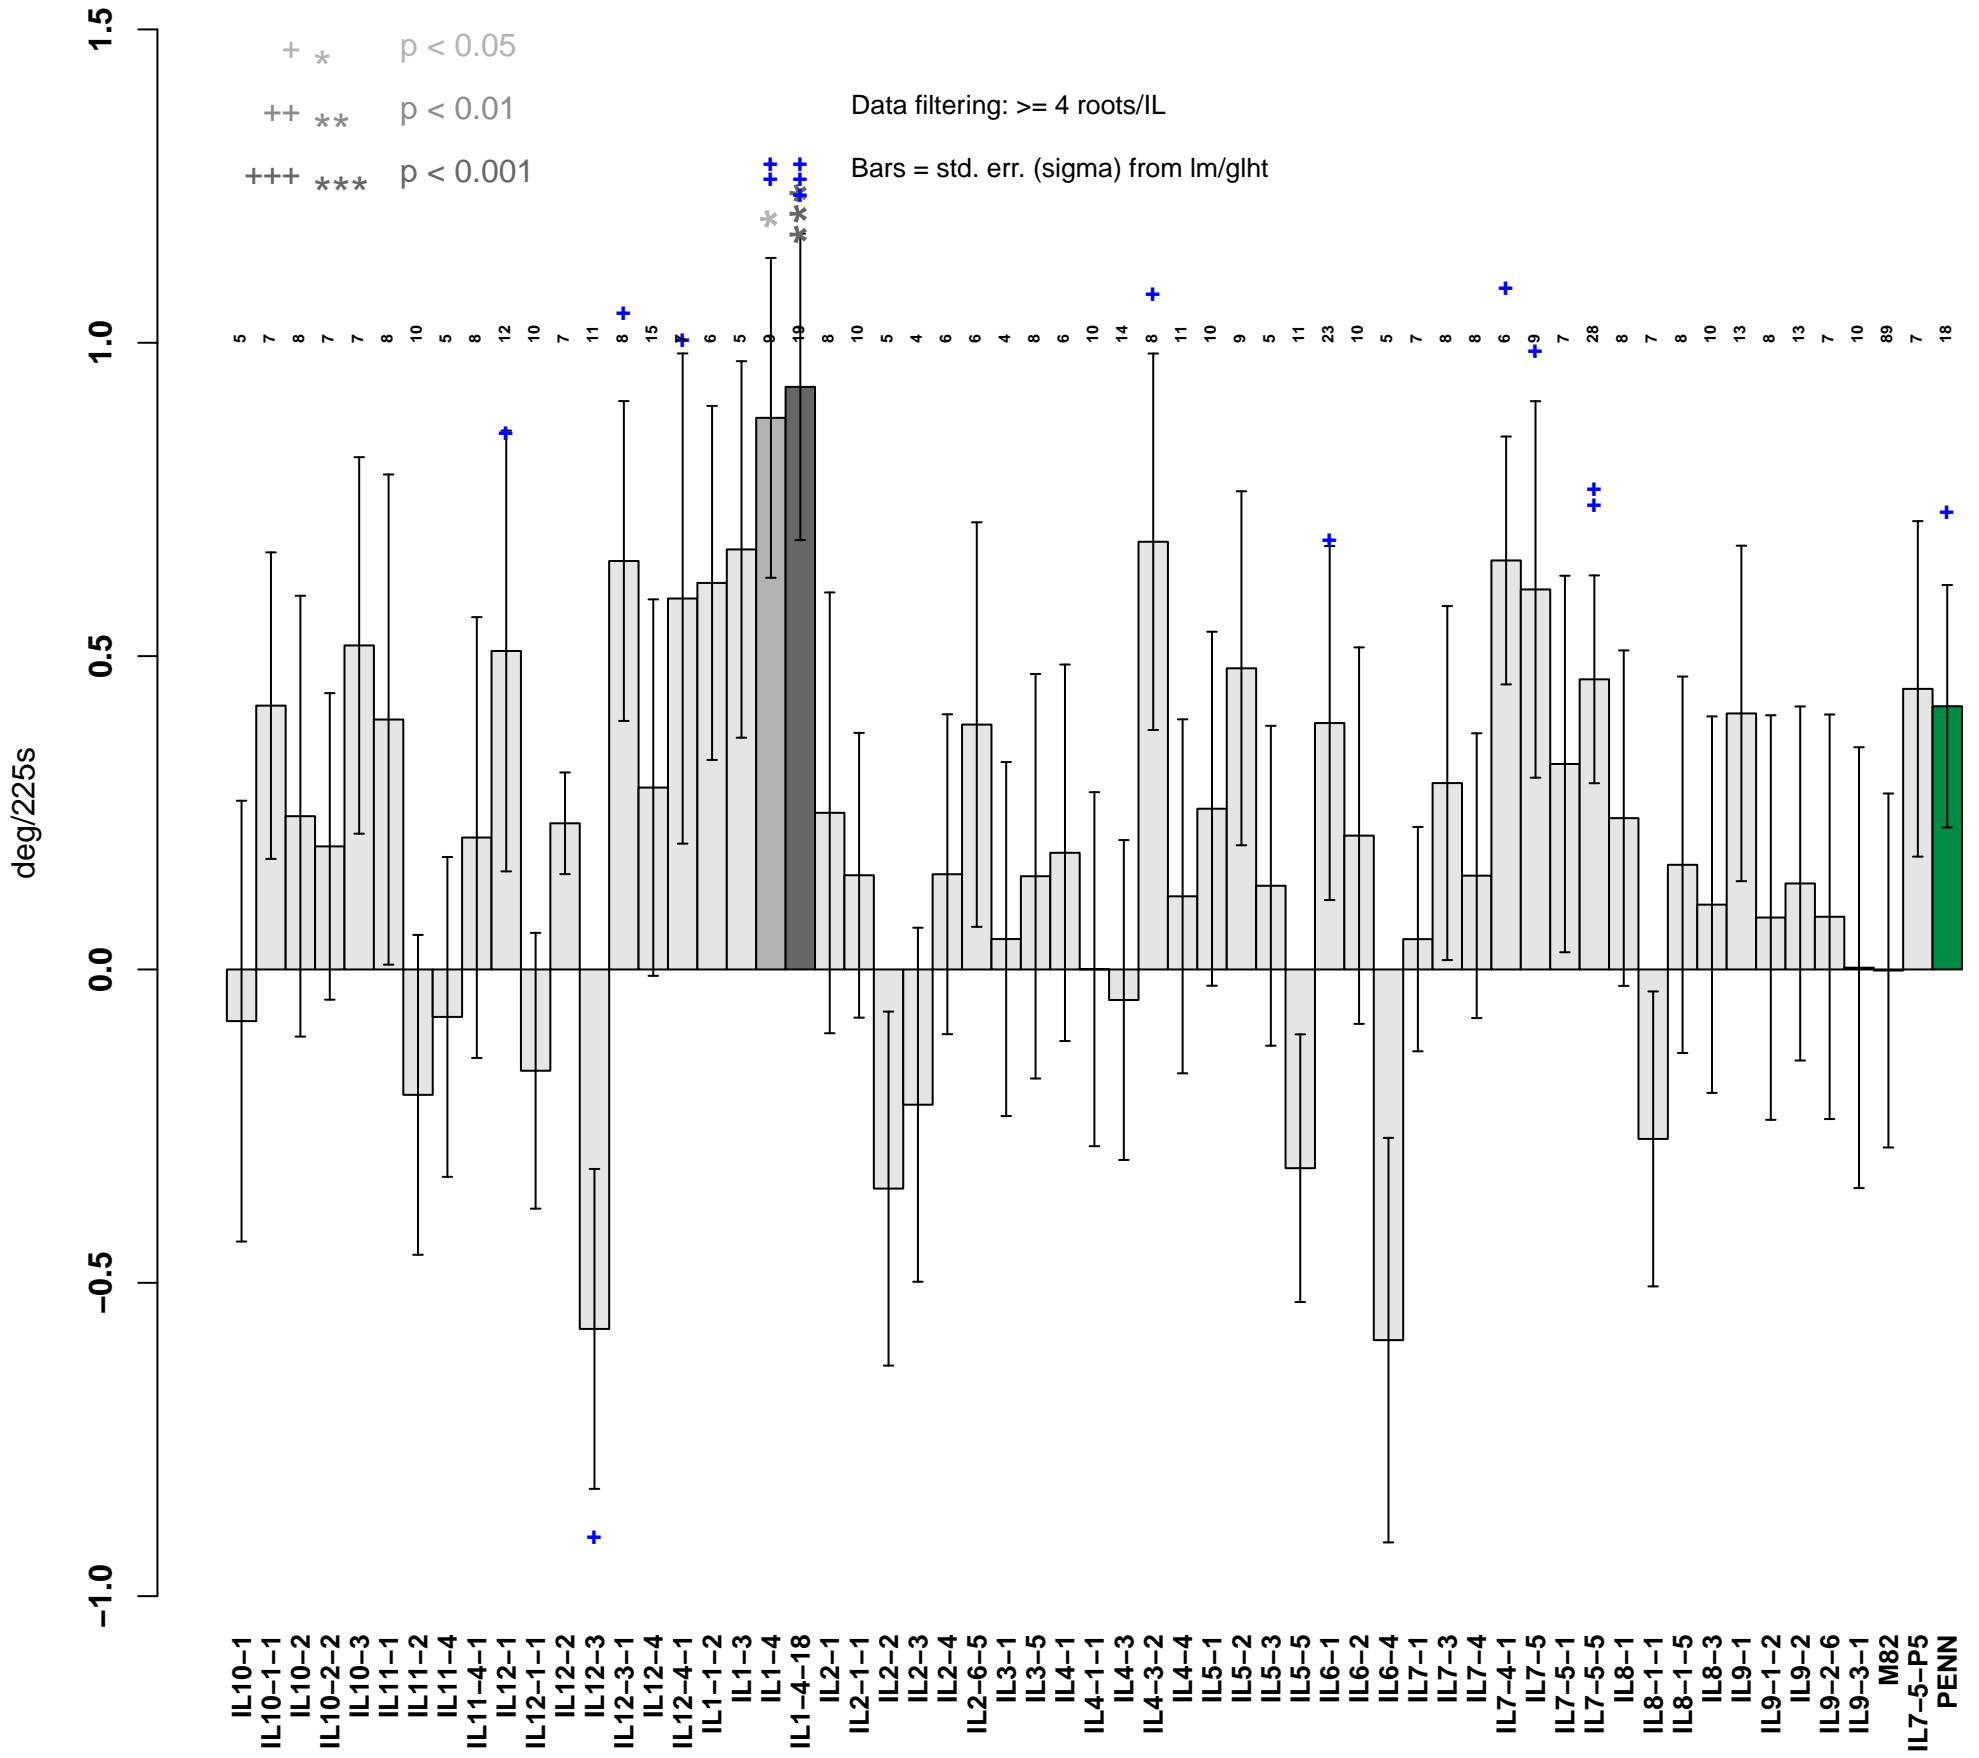

# Angle Rate T27

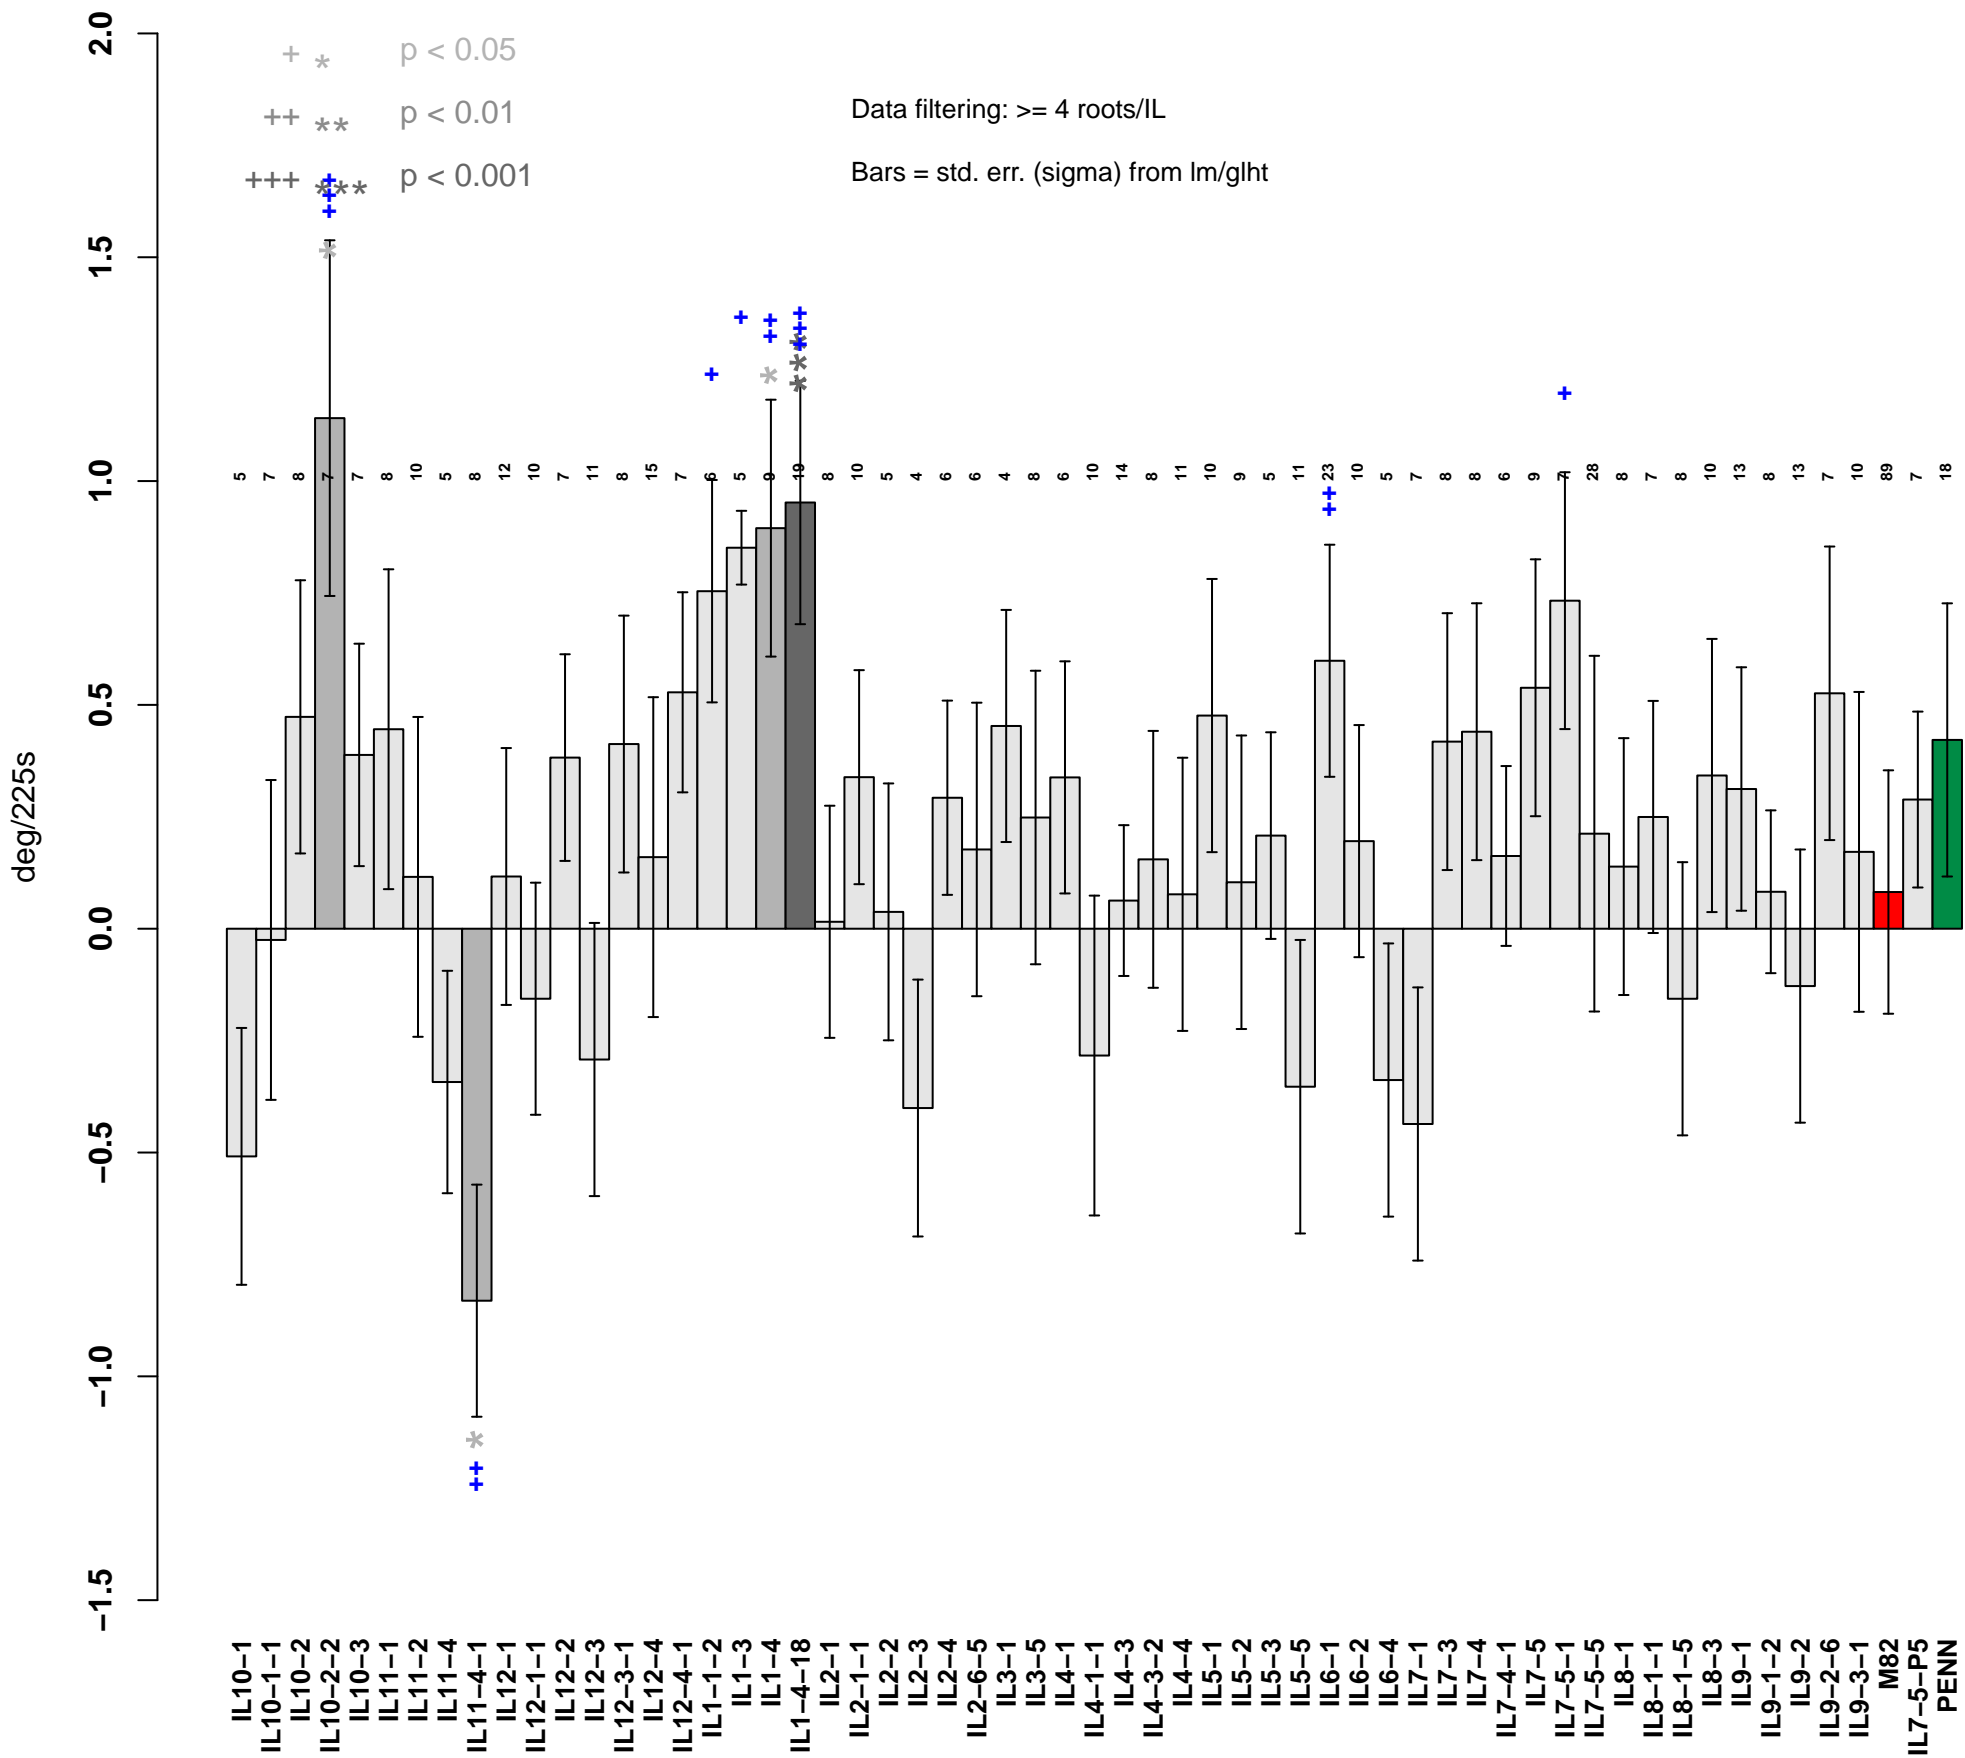

# Angle Rate T28

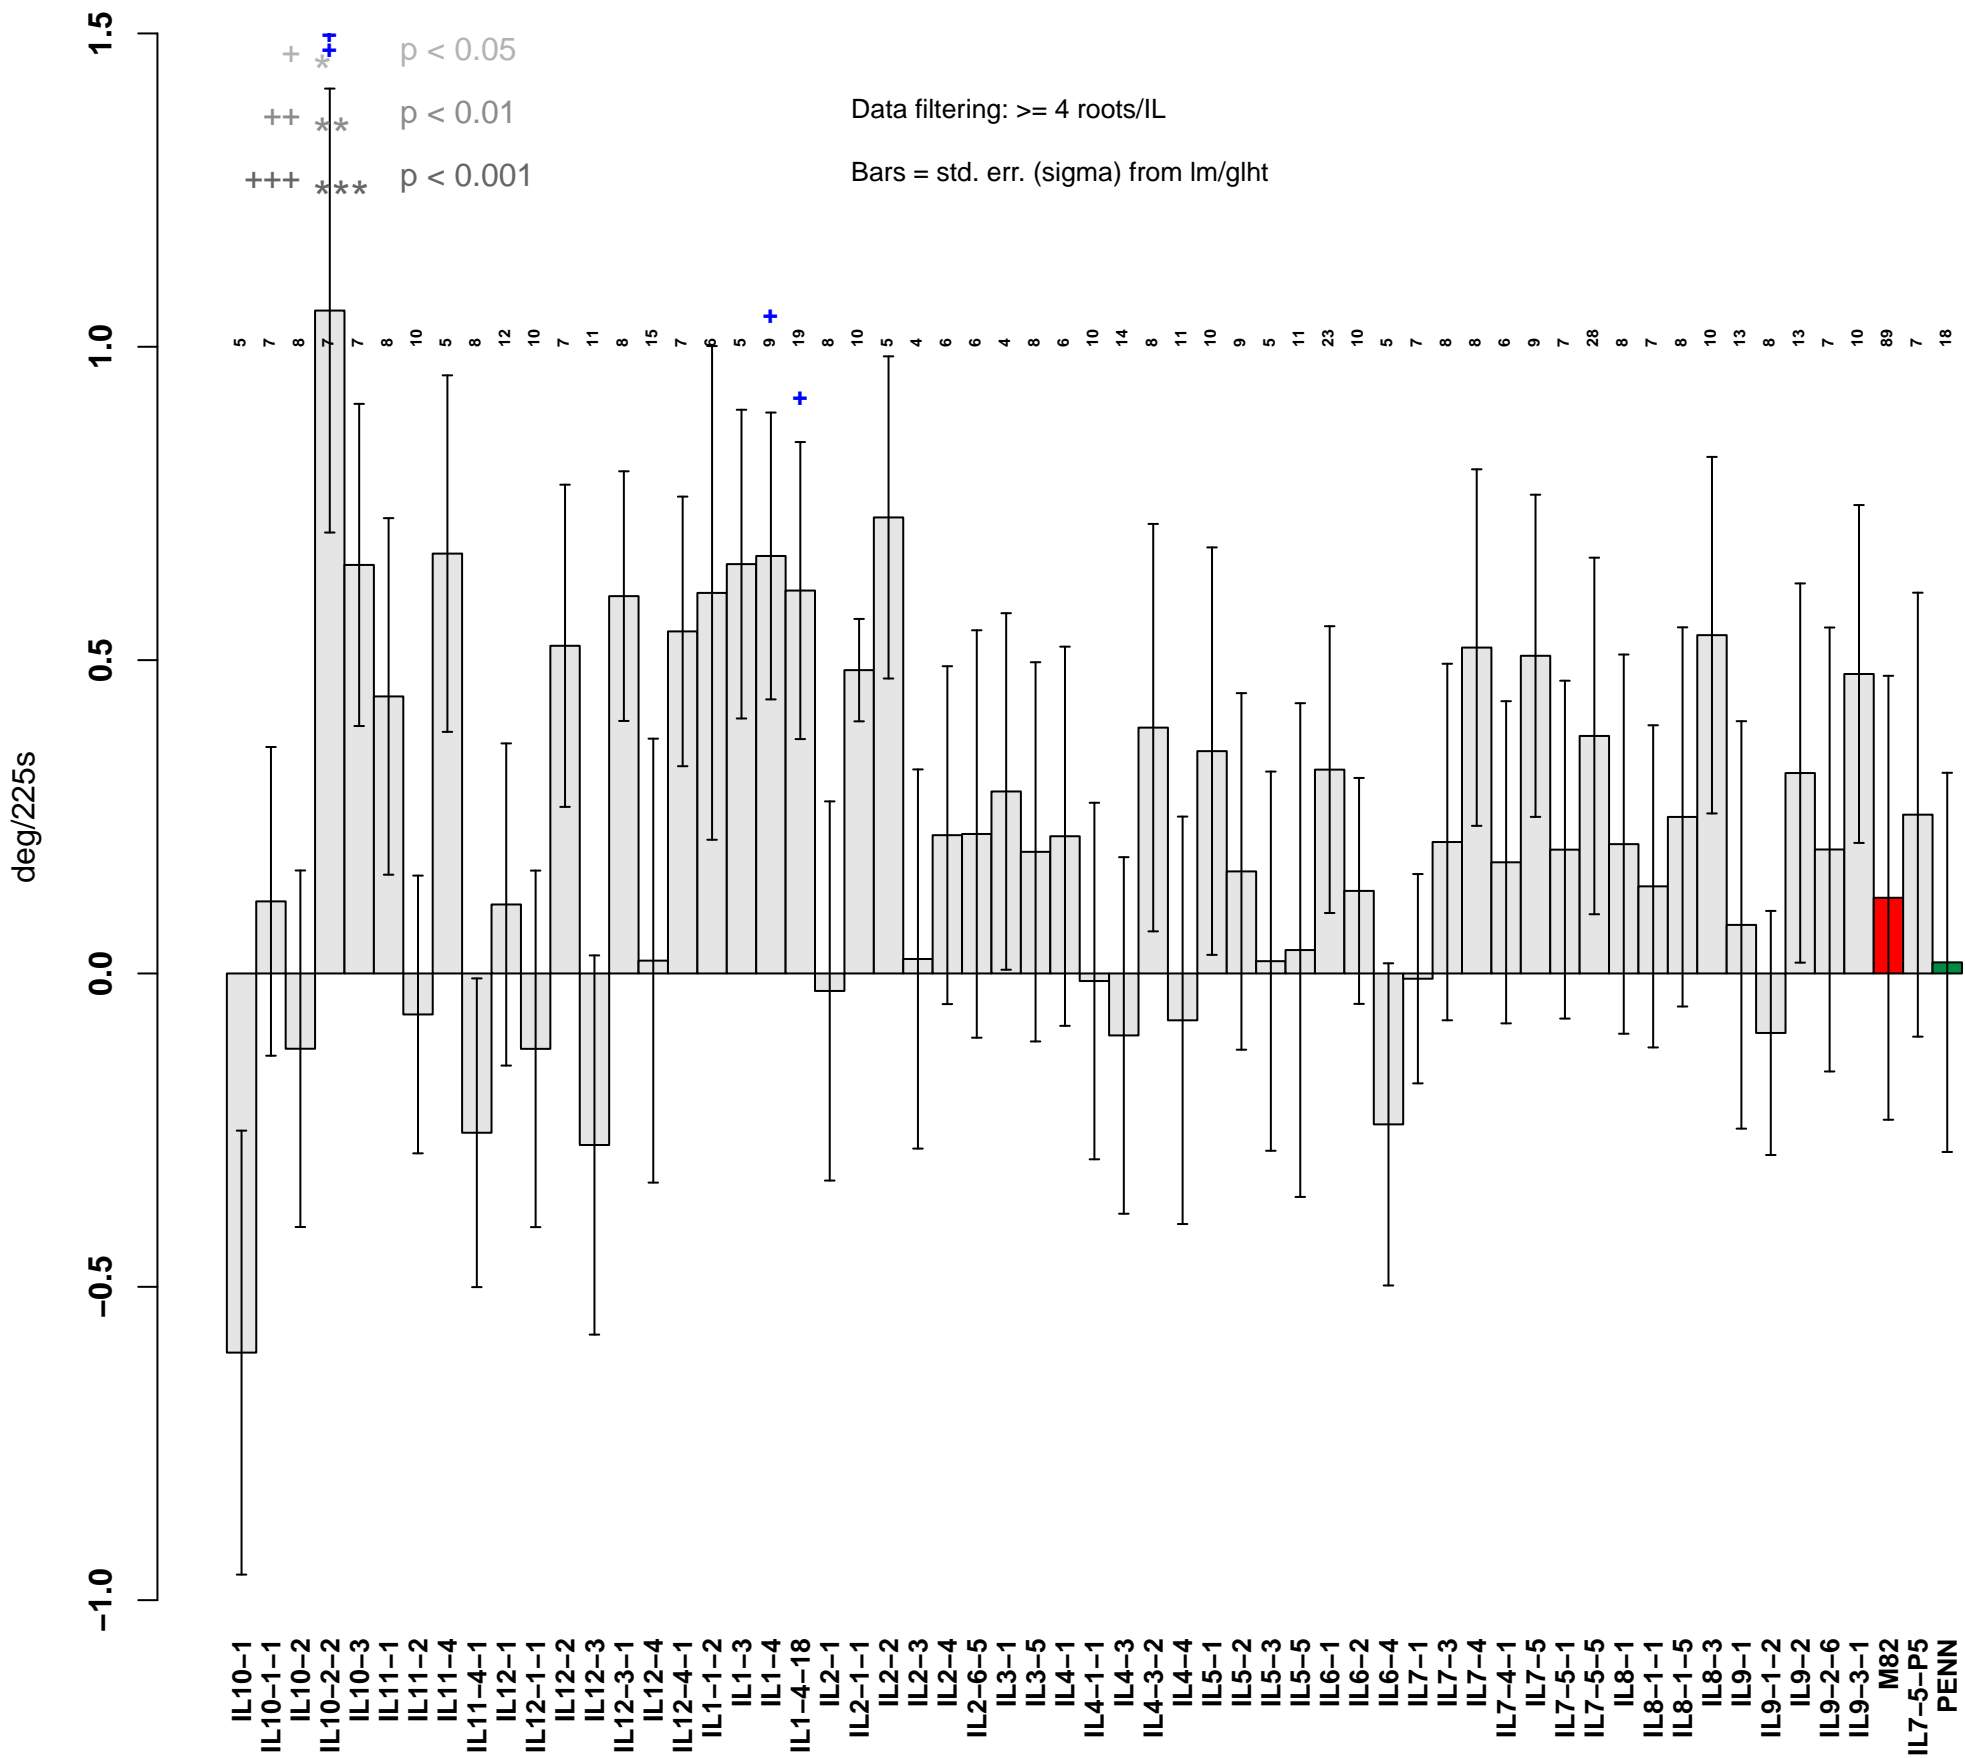

# Angle Rate T29

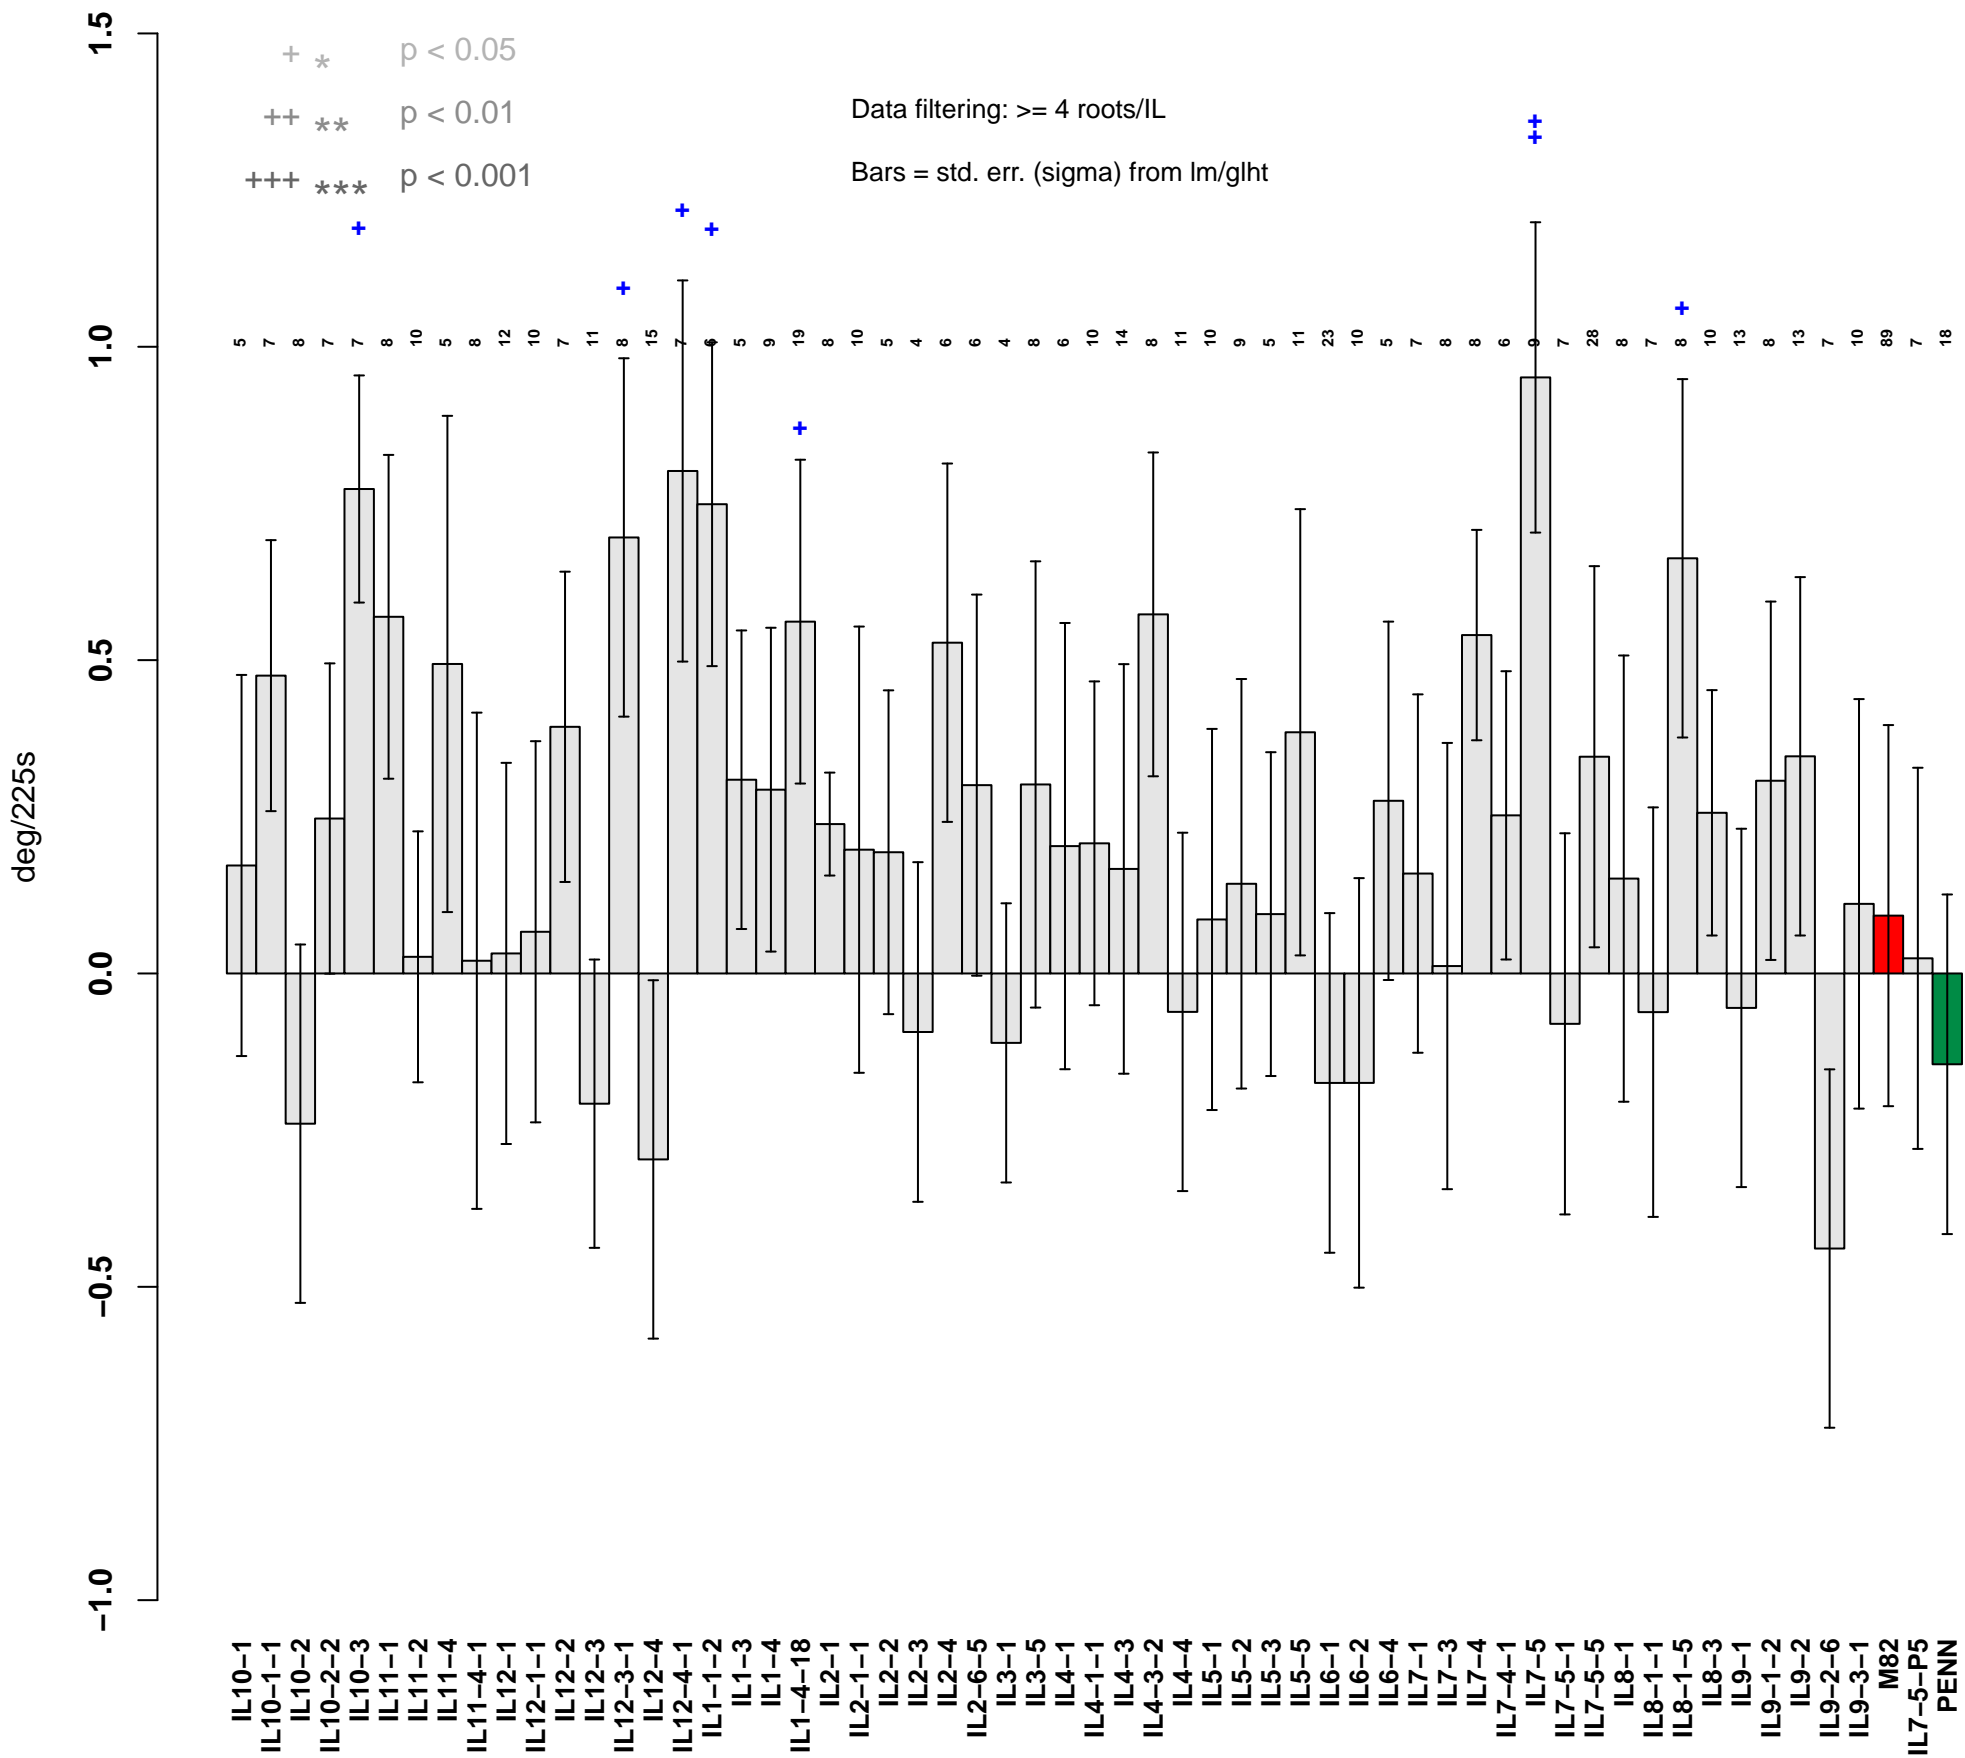

# Angle Rate T30

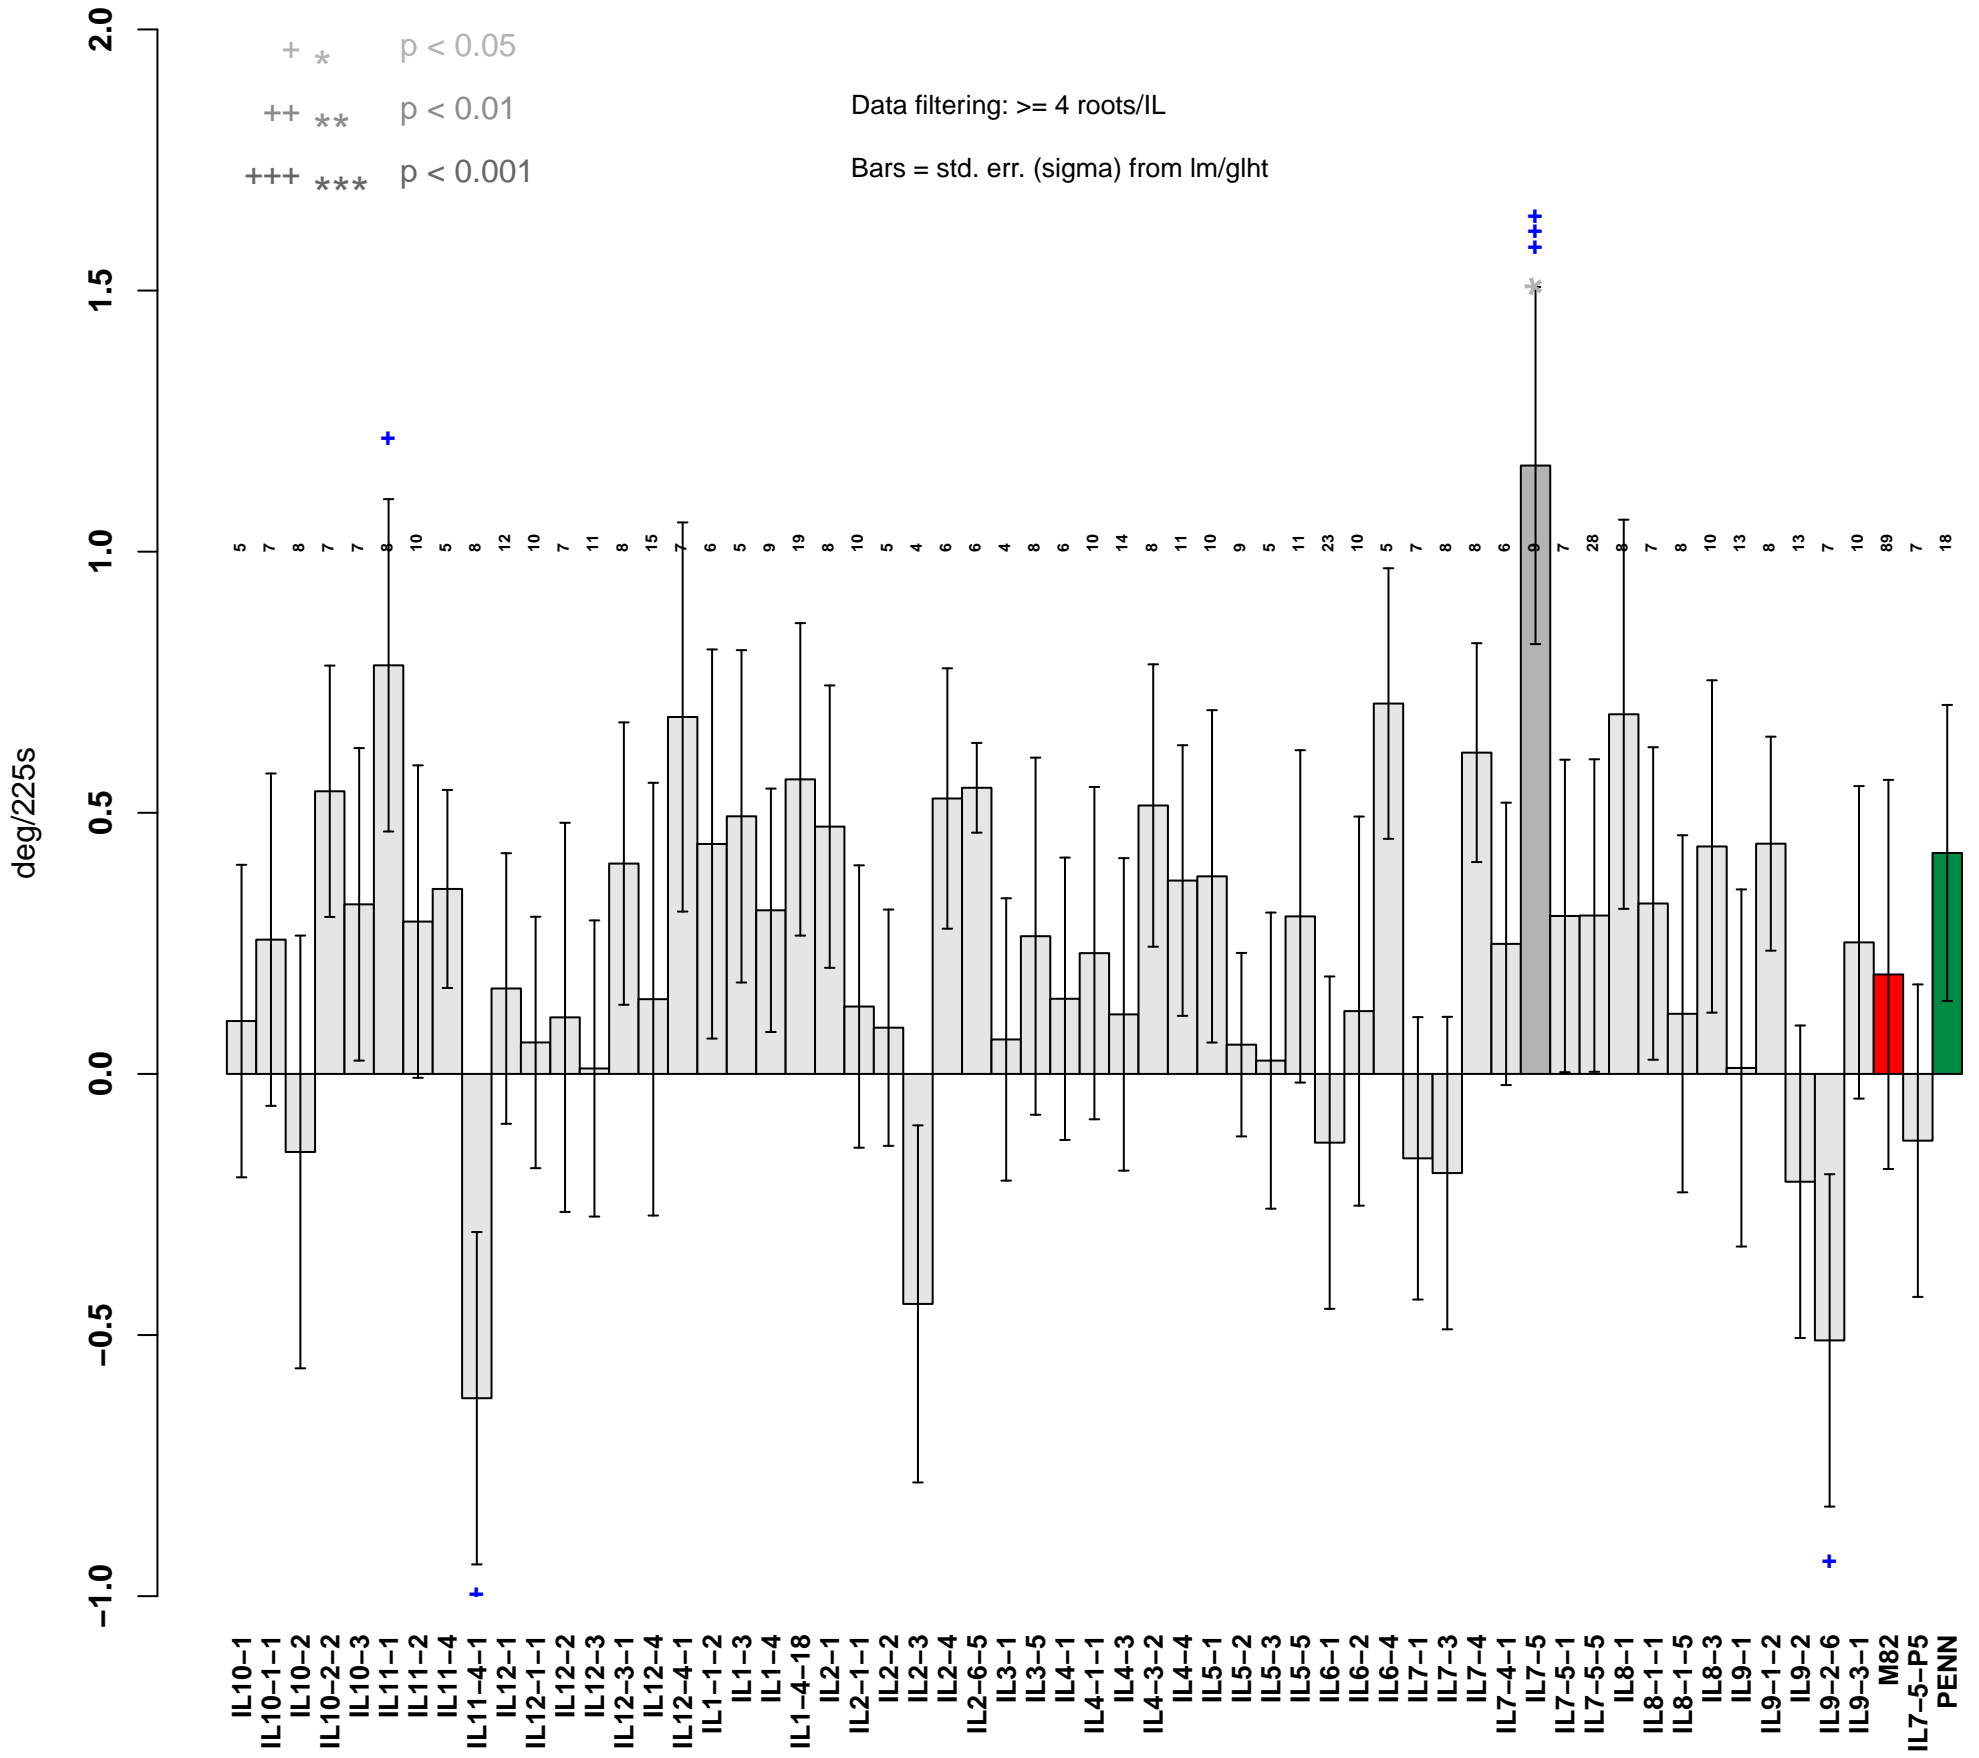

# Angle Rate T31

deg/225s

-0.5 0.0 0.5 1.0 1.5

+ \*  $p < 0.05$   
 ++ \*\*  $p < 0.01$   
 +++ \*\*\*  $p < 0.001$

Data filtering:  $\geq 4$  roots/IL

Bars = std. err. (sigma) from lm/glht

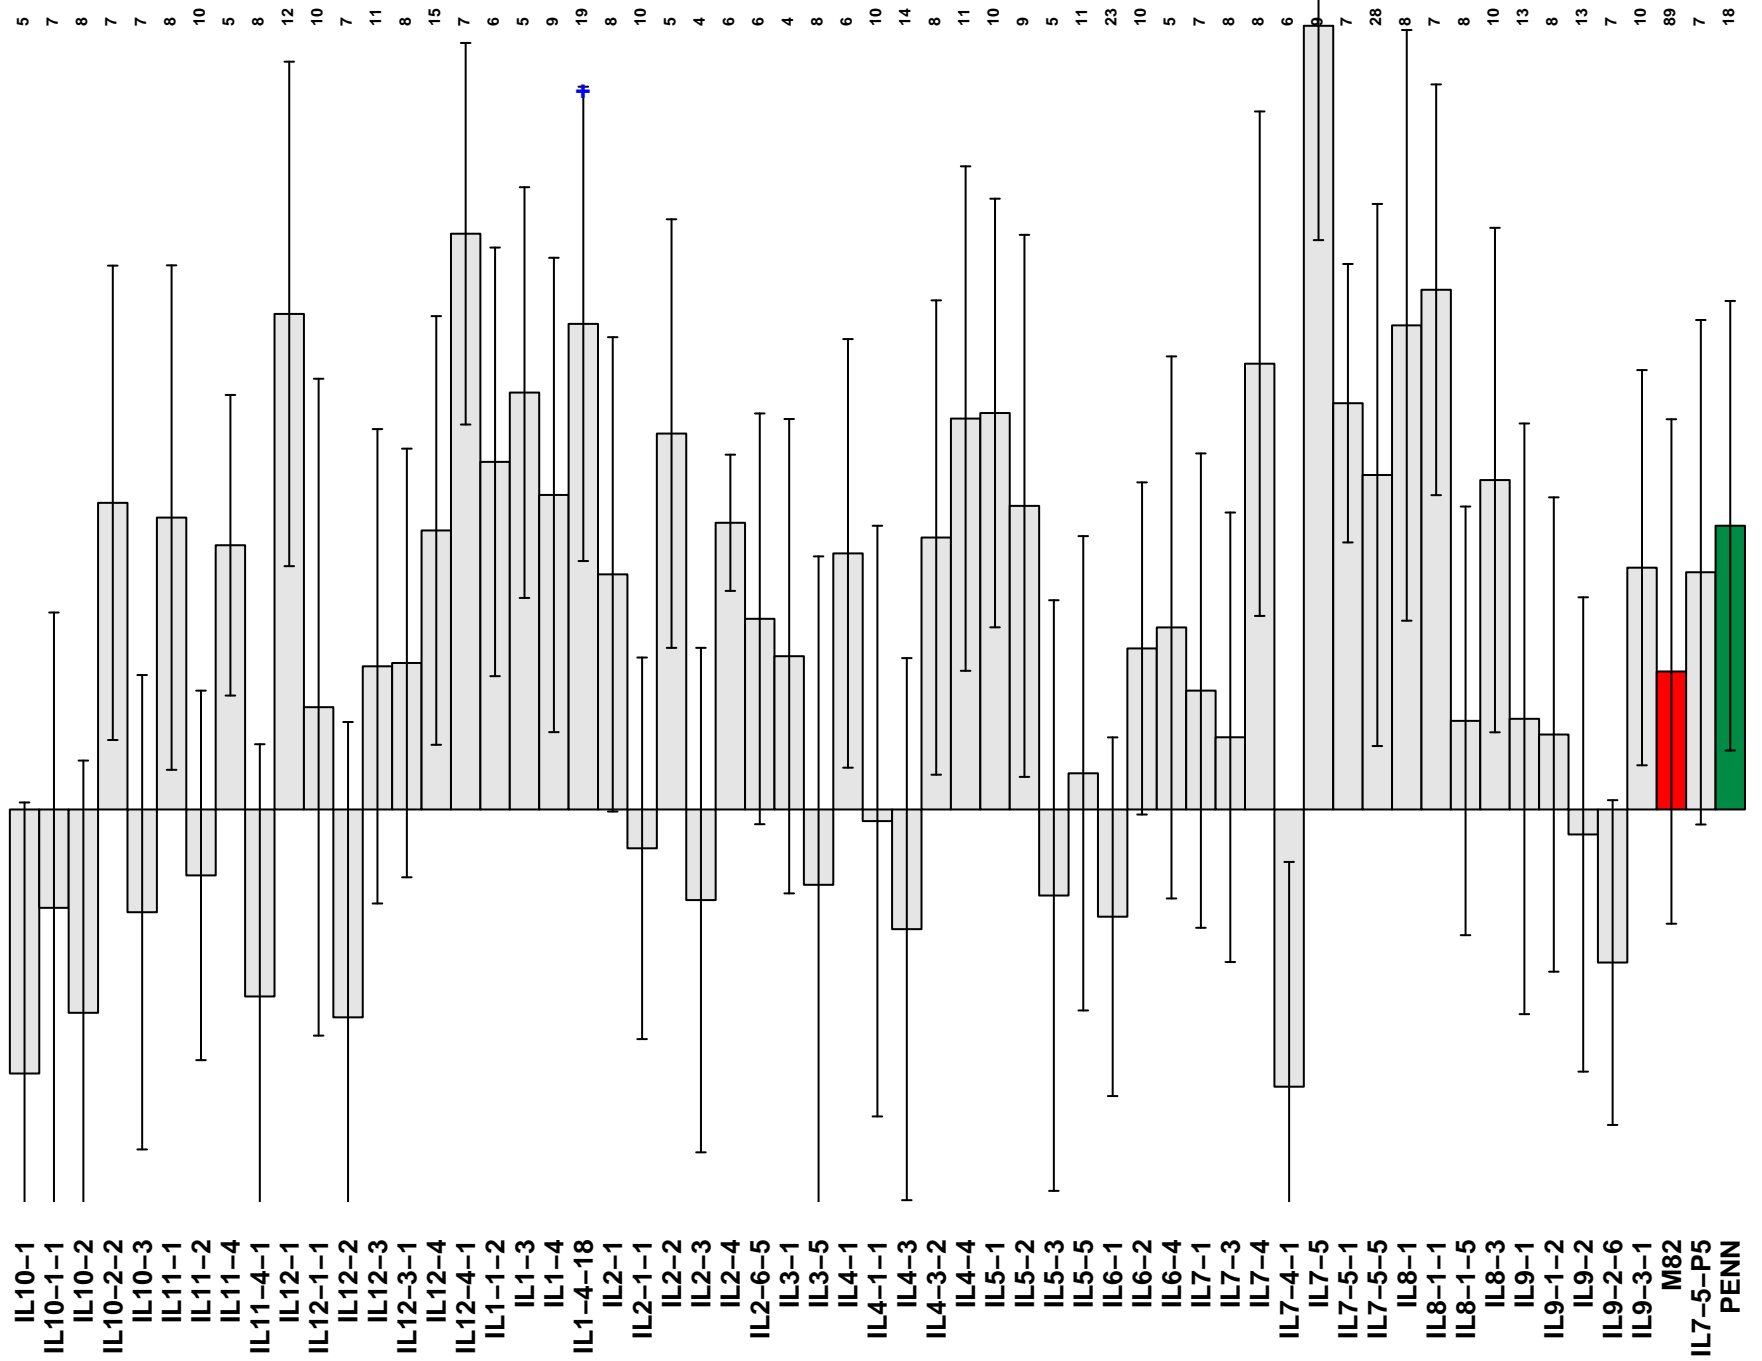



# Angle Rate T32

deg/225s

1.0  
0.5  
0.0  
-0.5  
-1.0

+ \* p < 0.05  
++ \*\* p < 0.01  
+++ \*\*\* p < 0.001

Data filtering: >= 4 roots/IL

Bars = std. err. (sigma) from lm/glht

IL10-1  
IL10-1-1  
IL10-2  
IL10-2-2  
IL10-3  
IL11-1  
IL11-2  
IL11-4  
IL11-4-1  
IL12-1  
IL12-1-1  
IL12-2  
IL12-3  
IL12-3-1  
IL12-4  
IL12-4-1  
IL1-1-2  
IL1-3  
IL1-4  
IL1-4-18  
IL2-1  
IL2-1-1  
IL2-2  
IL2-3  
IL2-4  
IL2-6-5  
IL3-1  
IL3-5  
IL4-1  
IL4-1-1  
IL4-3  
IL4-3-2  
IL4-4  
IL5-1  
IL5-2  
IL5-3  
IL5-5  
IL6-1  
IL6-2  
IL6-4  
IL7-1  
IL7-3  
IL7-4  
IL7-4-1  
IL7-5  
IL7-5-1  
IL7-5-5  
IL8-1  
IL8-1-1  
IL8-1-5  
IL8-3  
IL9-1  
IL9-1-2  
IL9-2  
IL9-2-6  
IL9-3-1  
M82  
IL7-5-P5  
PENN

# Angle Rate T33

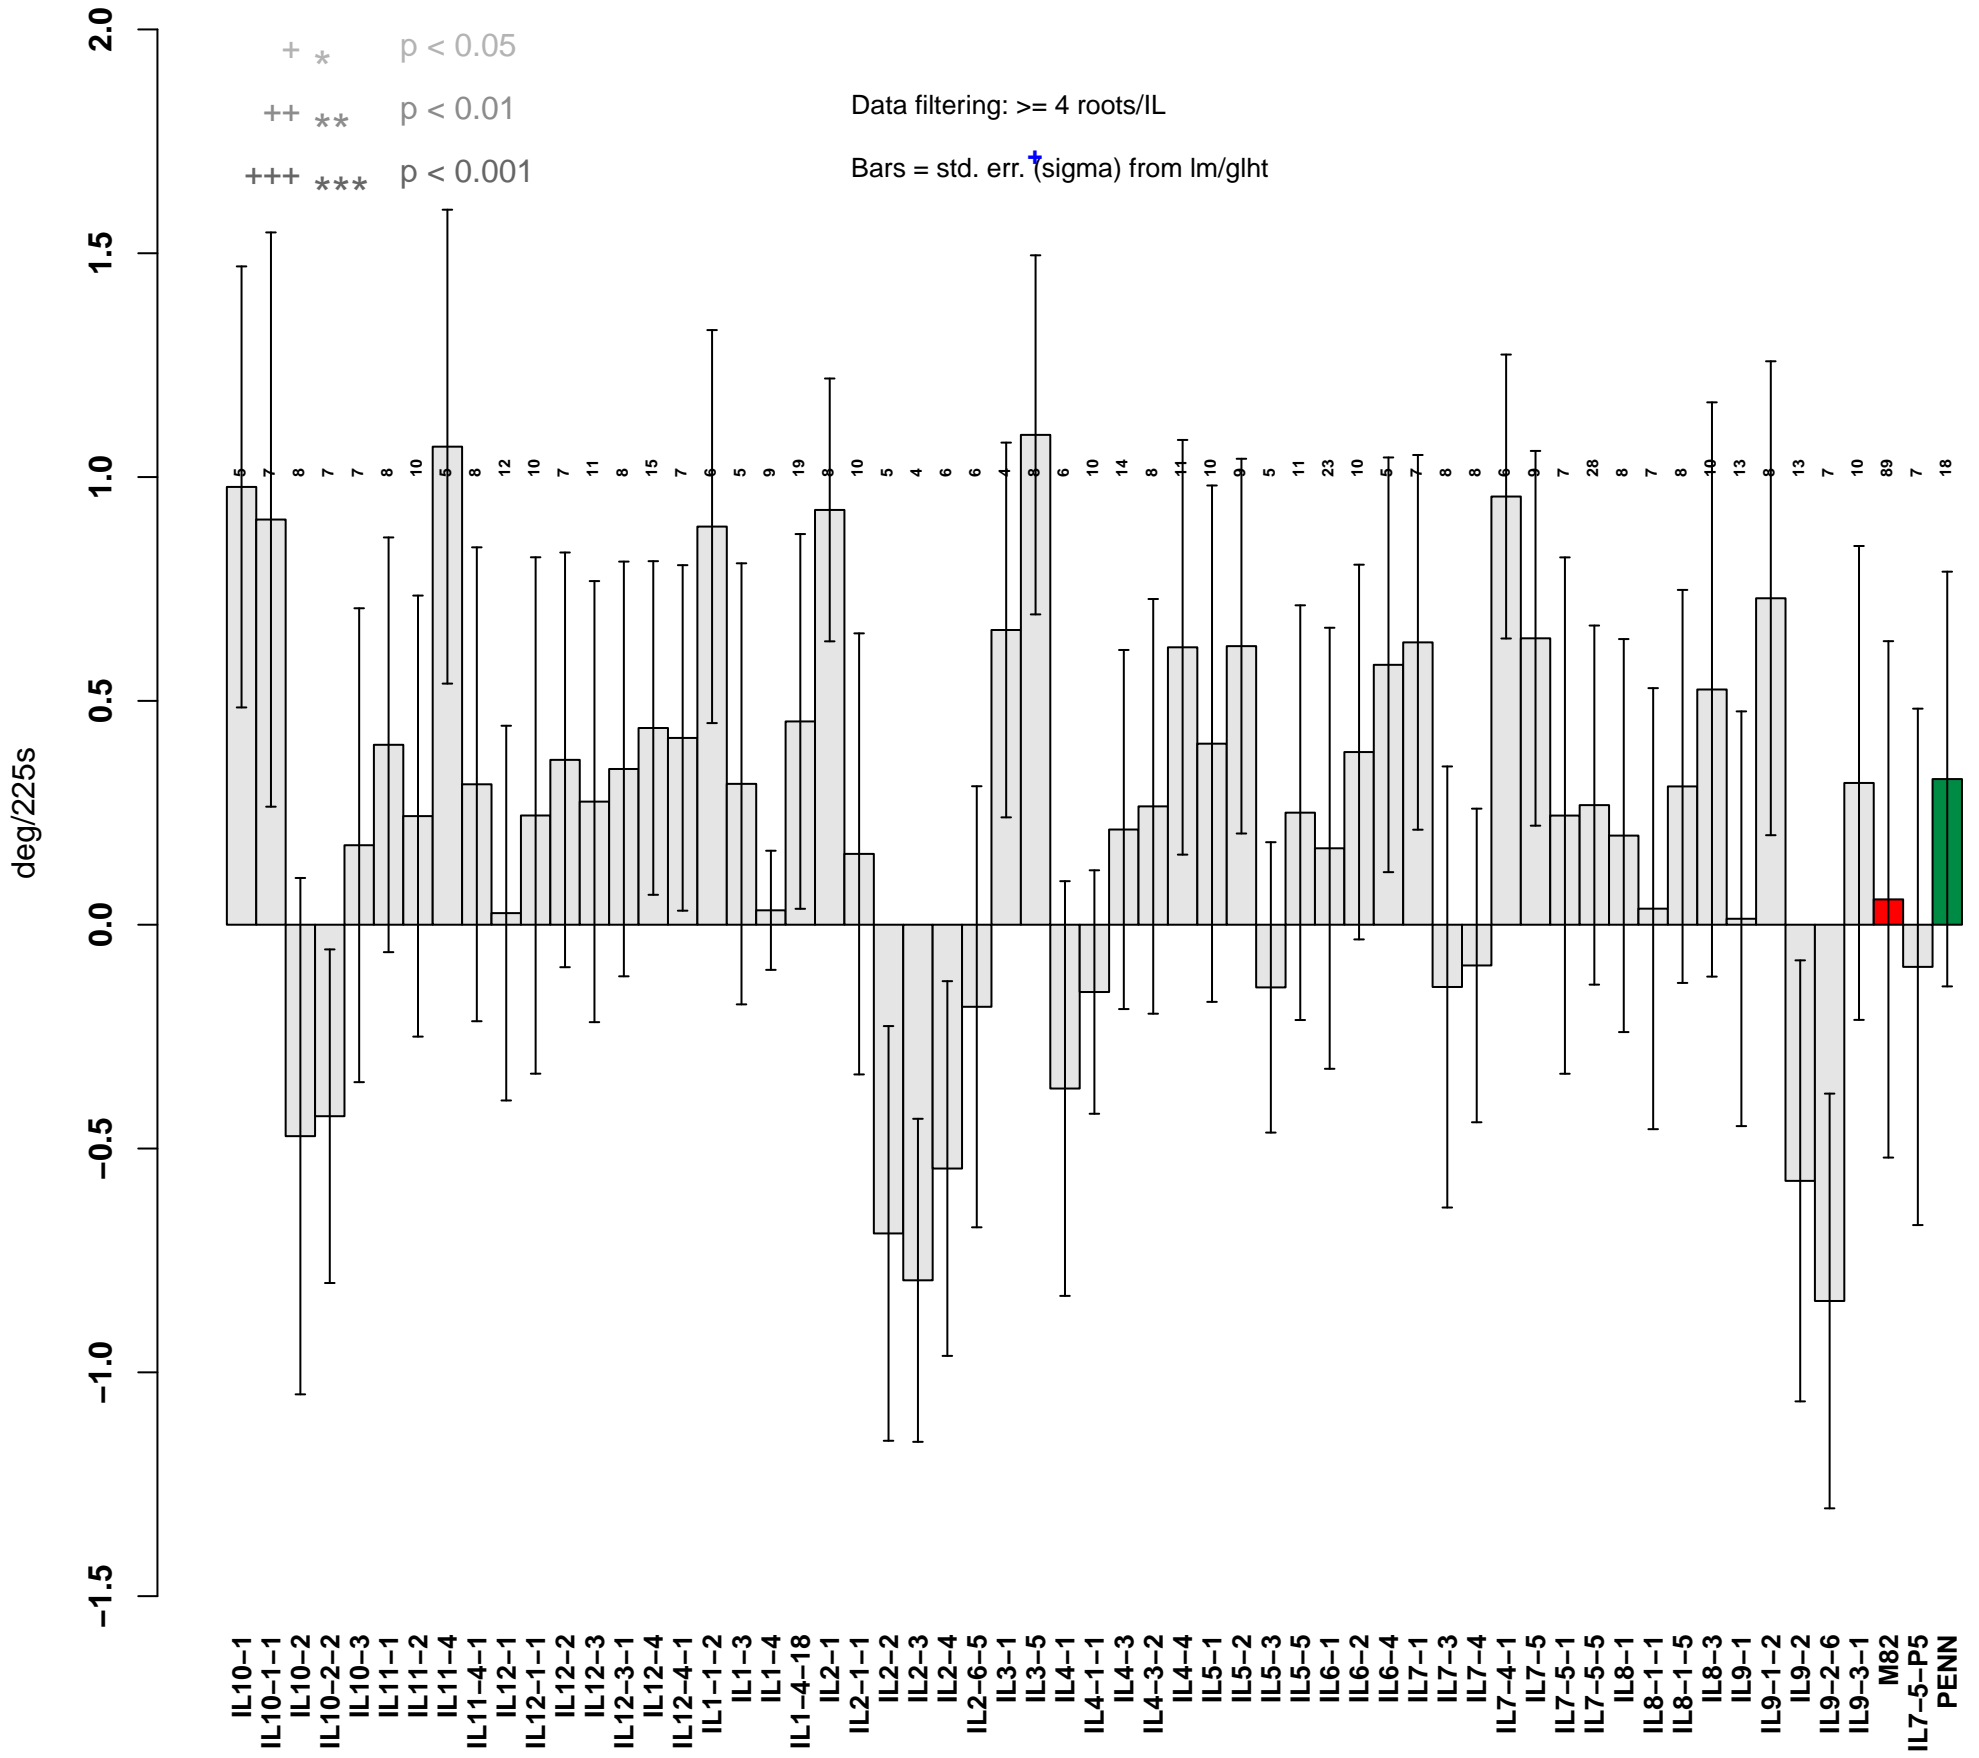

Supplement: Supplementary file 8 [file 2]
