# Supplementary material
Source: publisher figshare collection journal article supplement (https://gsajournals.figshare.com/articles/dataset/_/7237562)

Data for trait T0

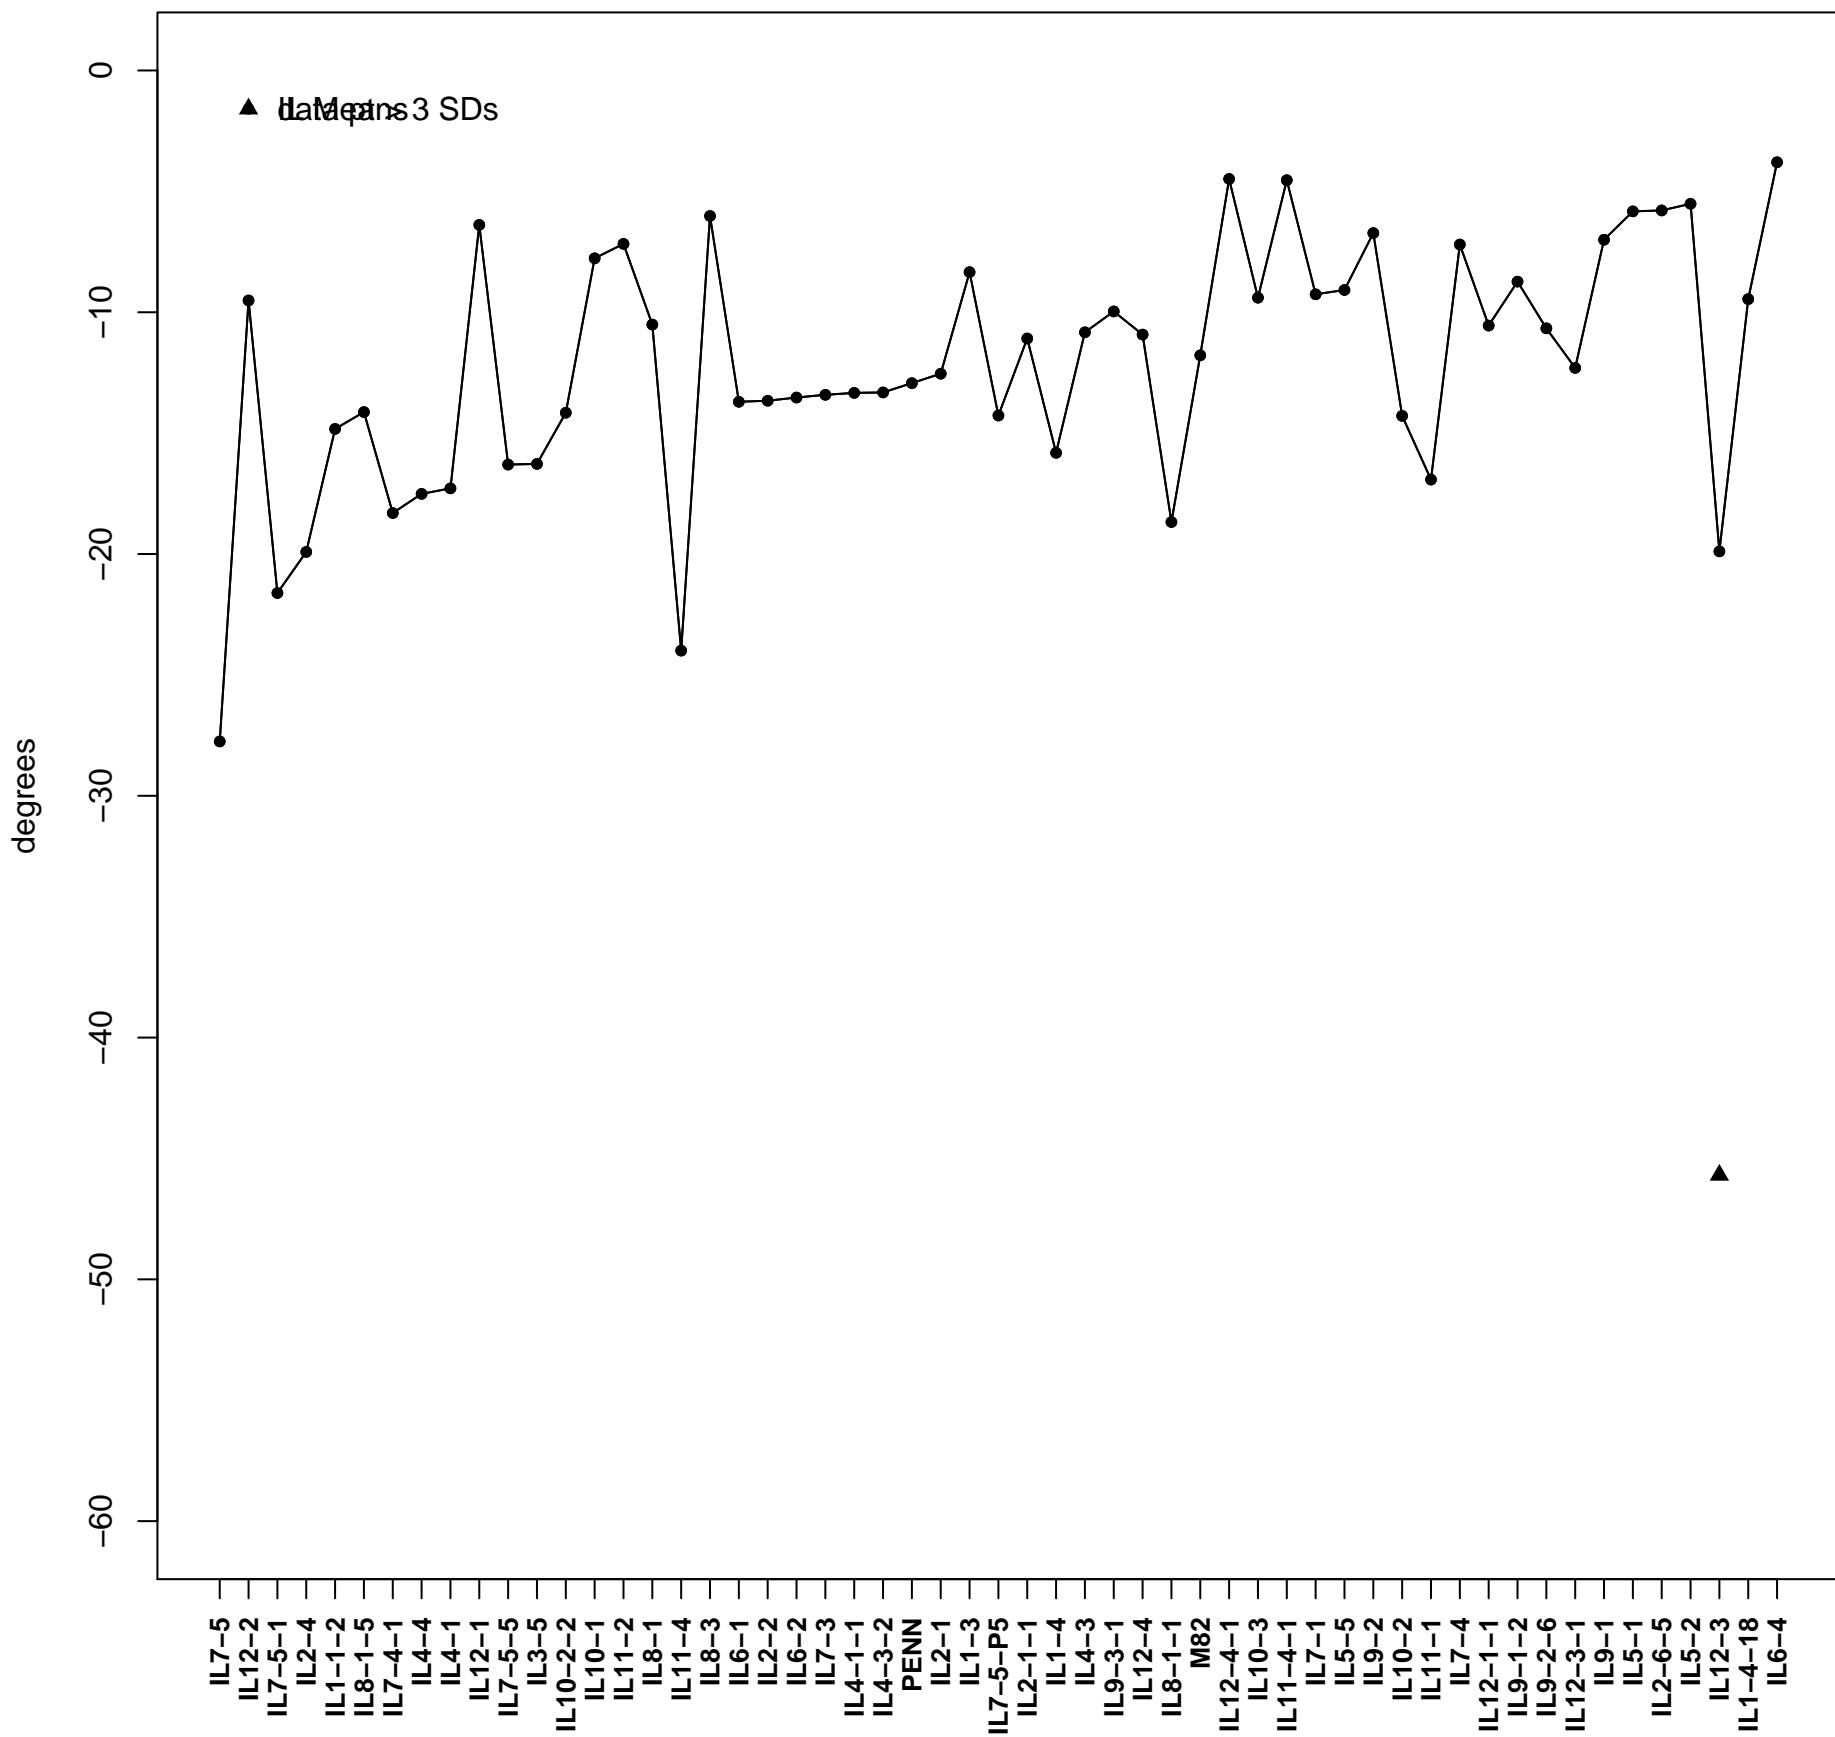

Data for trait T1

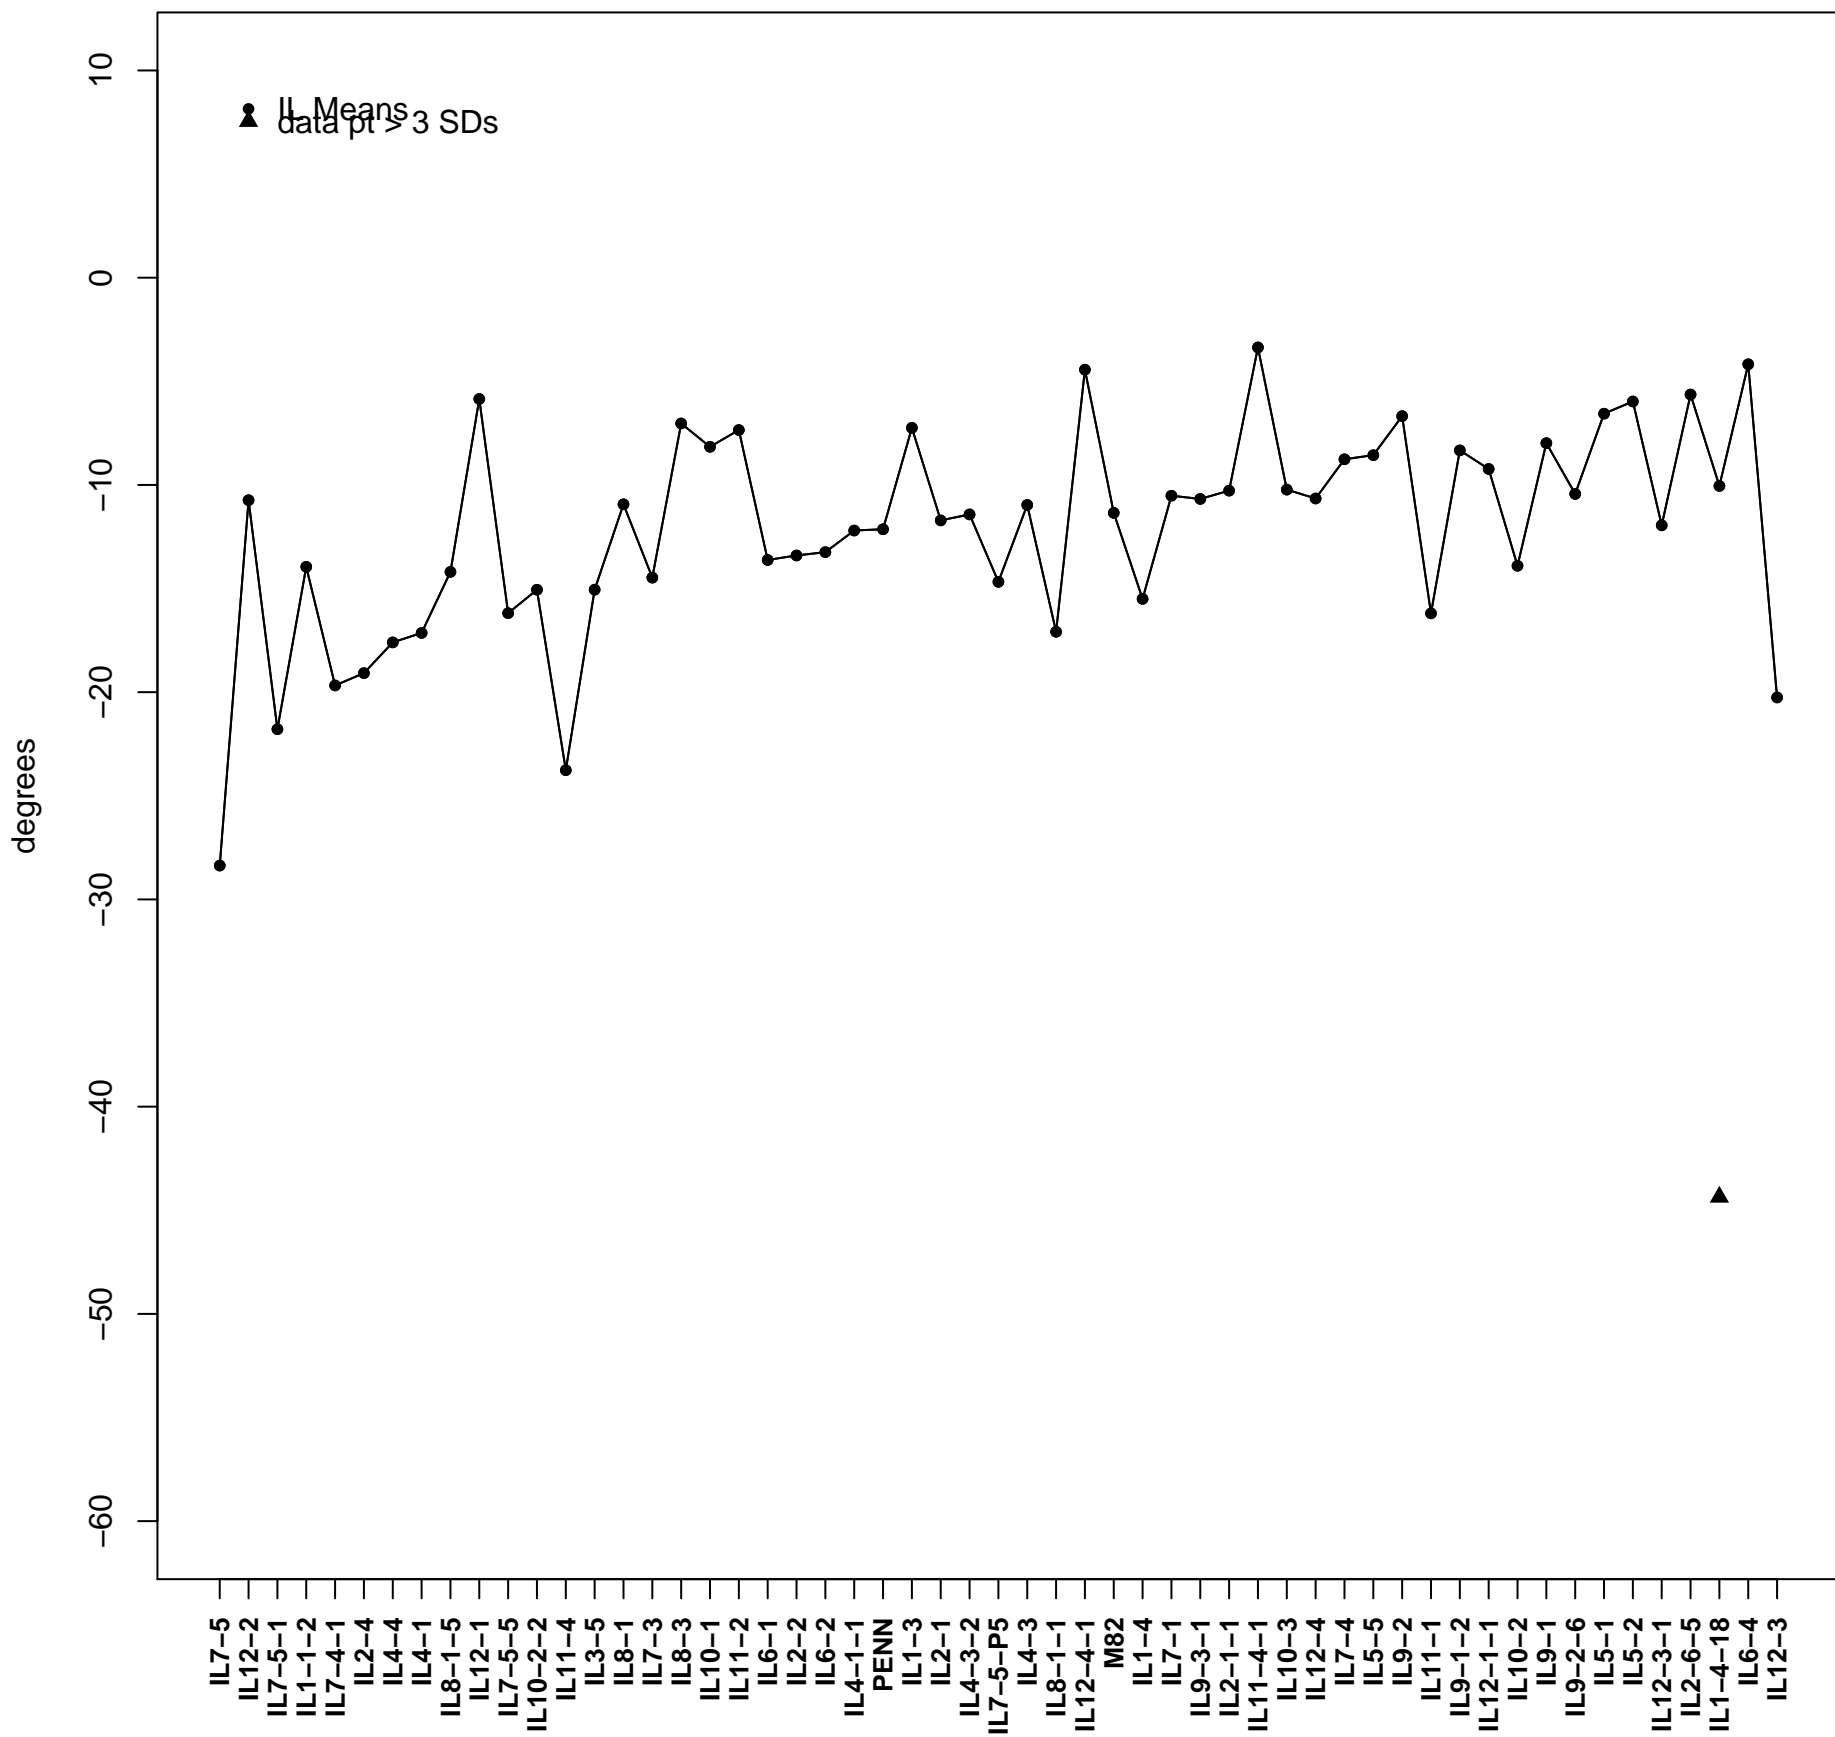

Data for trait T2

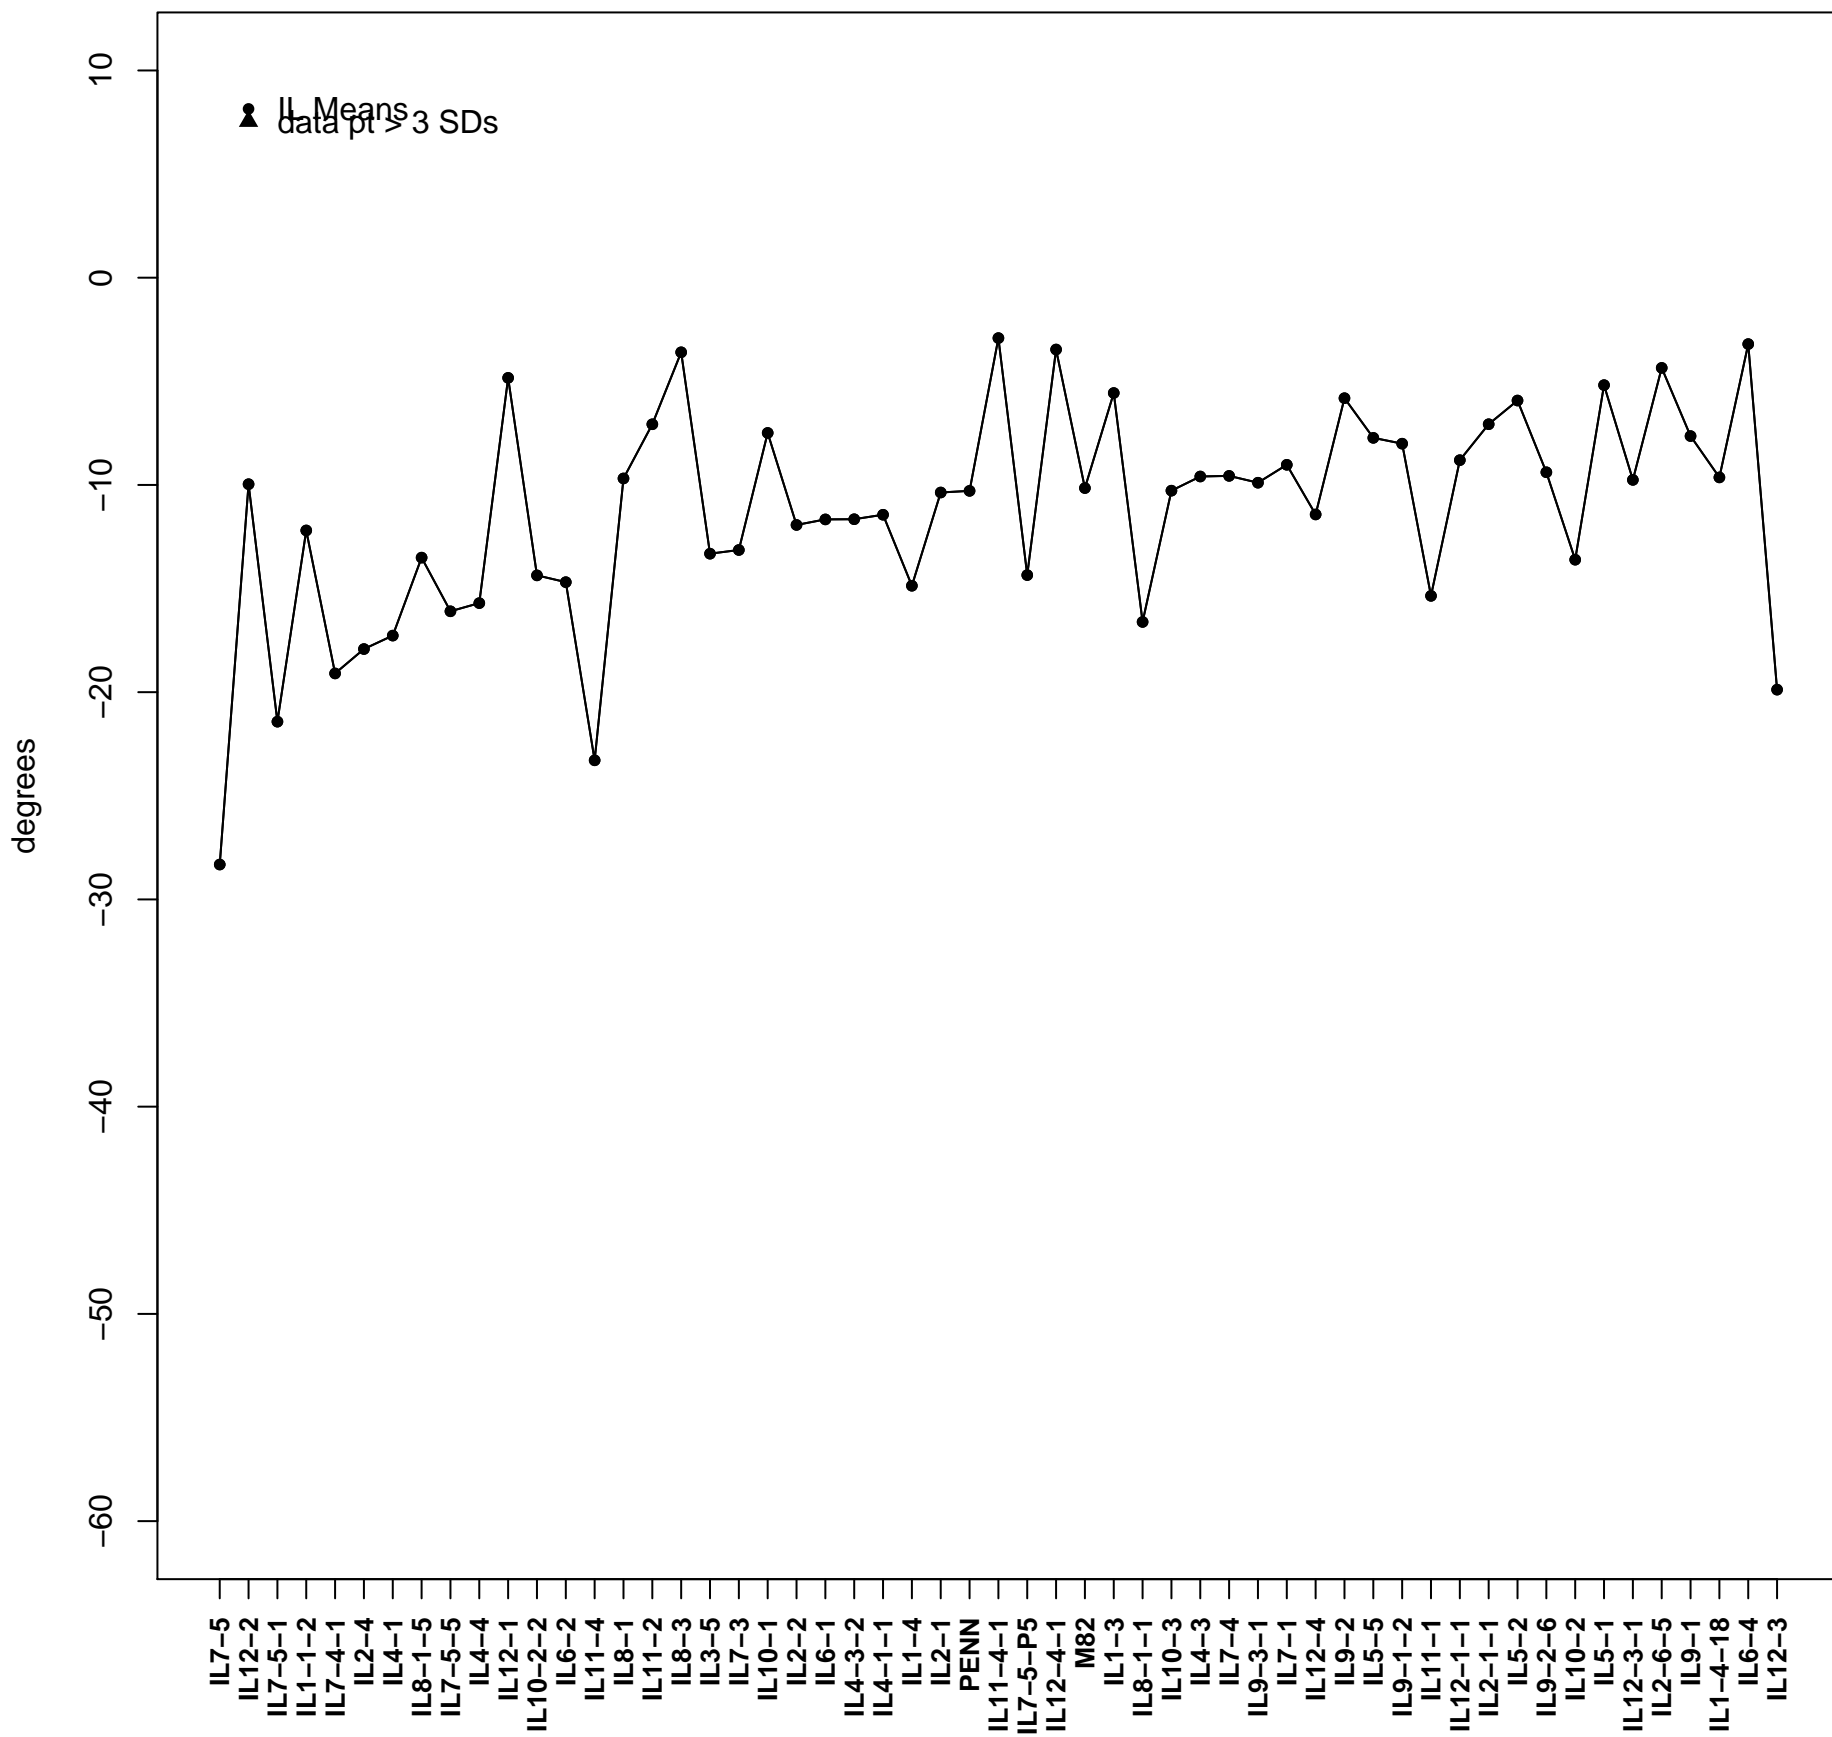

Data for trait T3

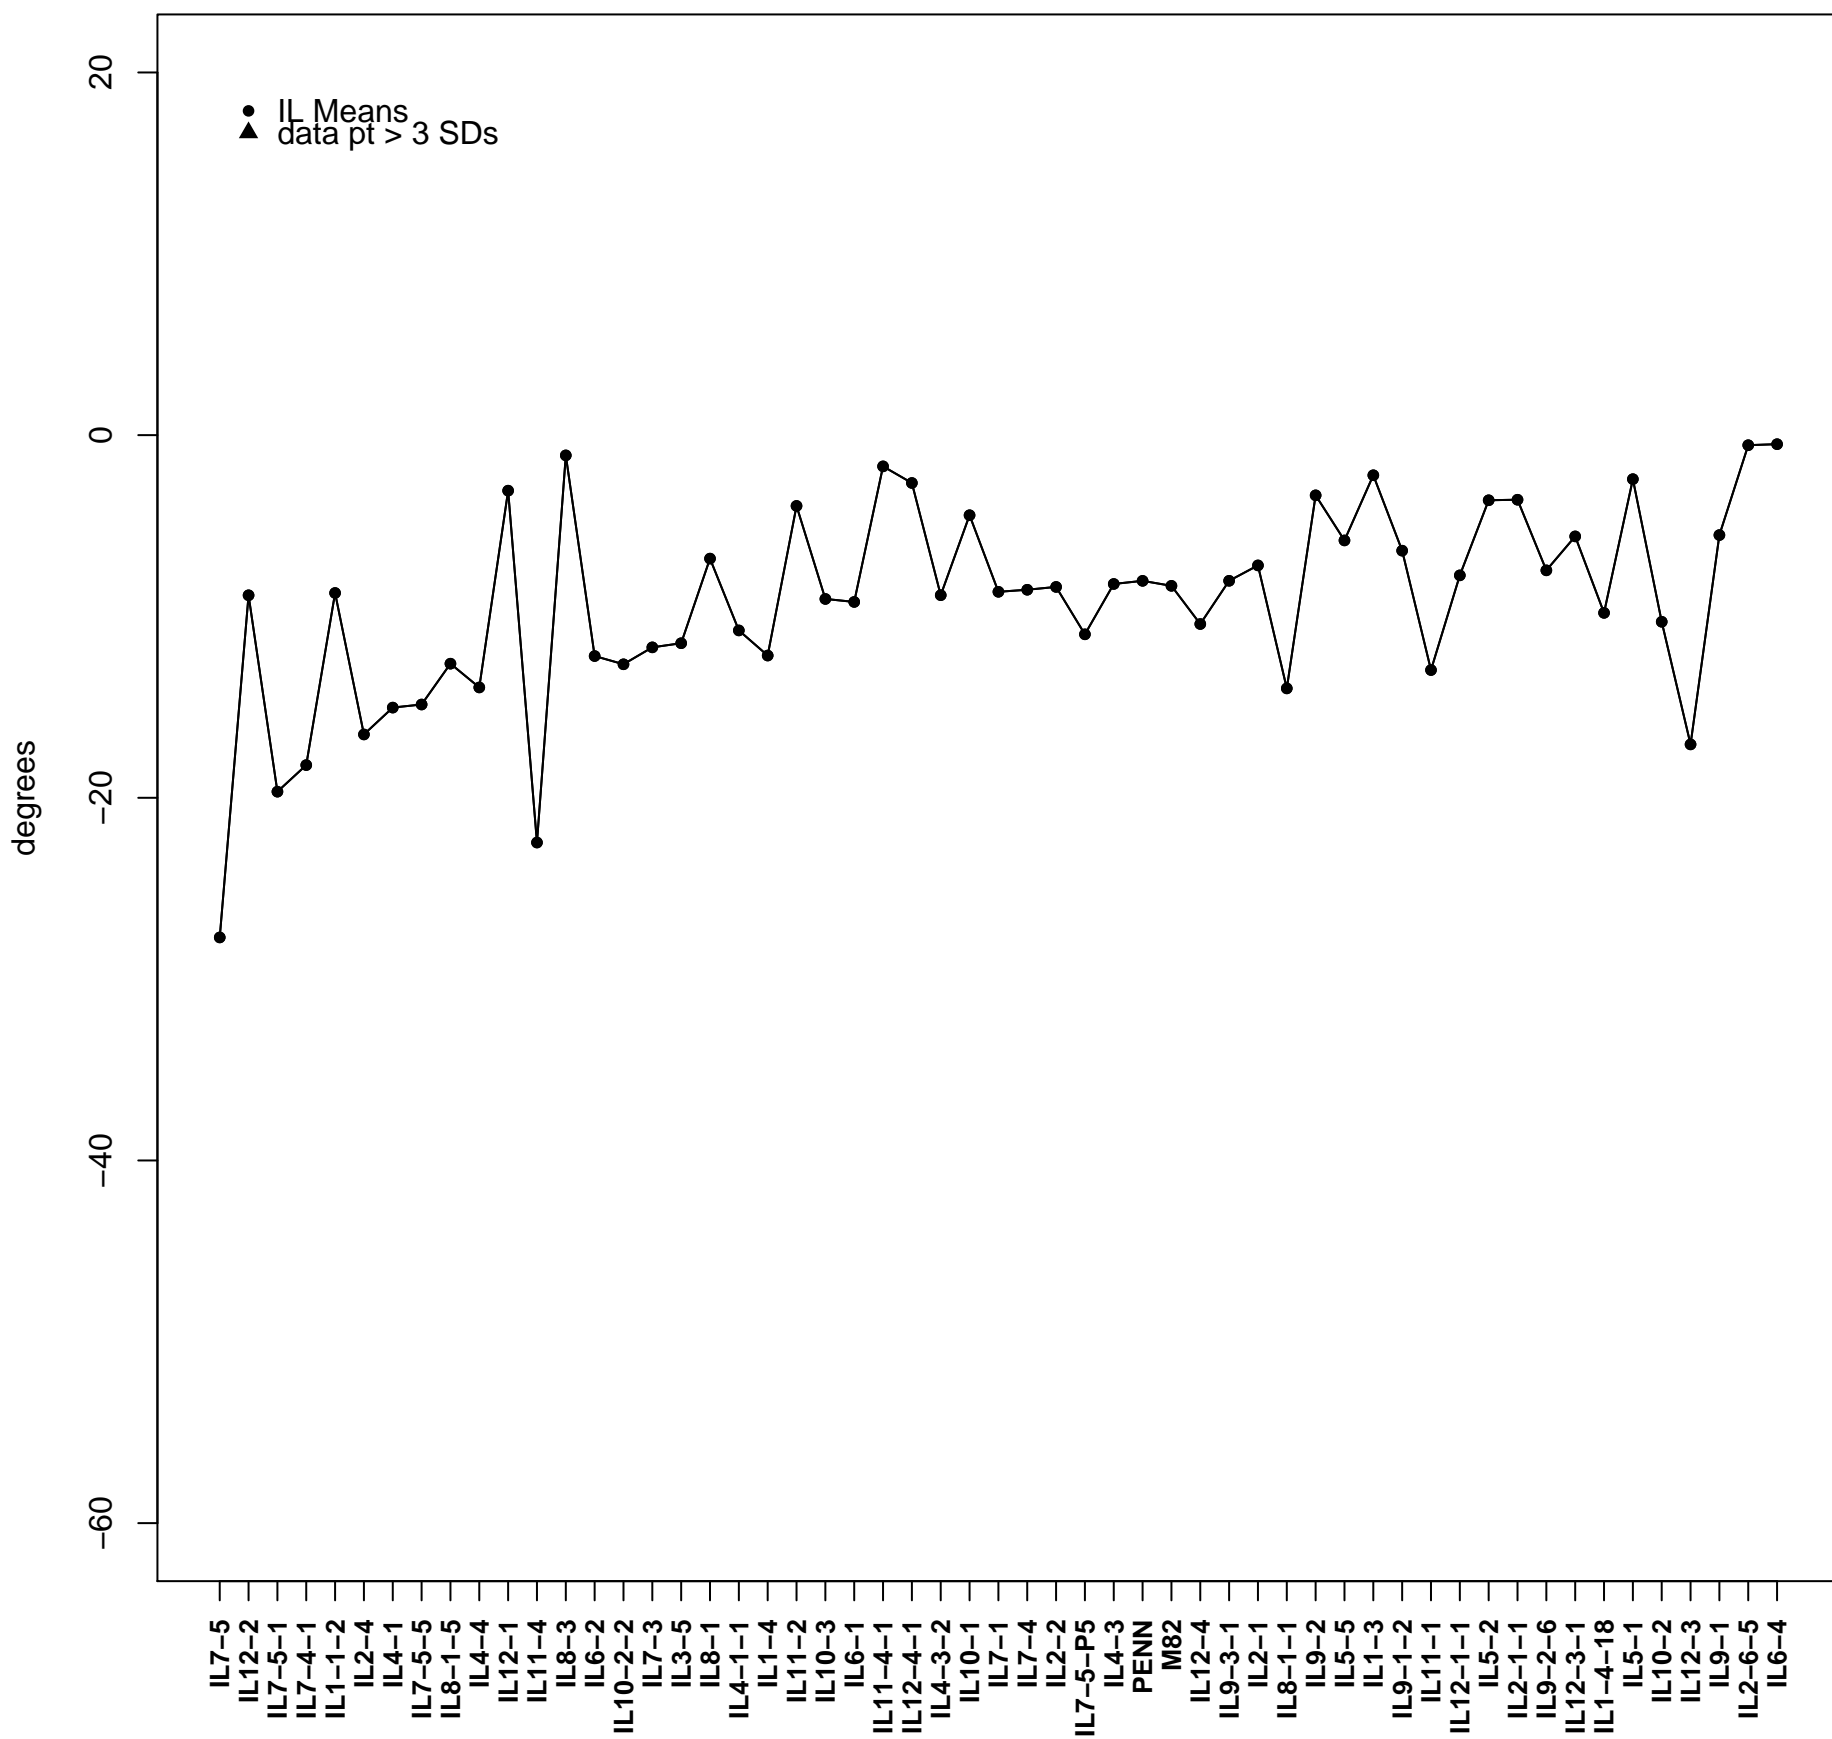

Data for trait T4

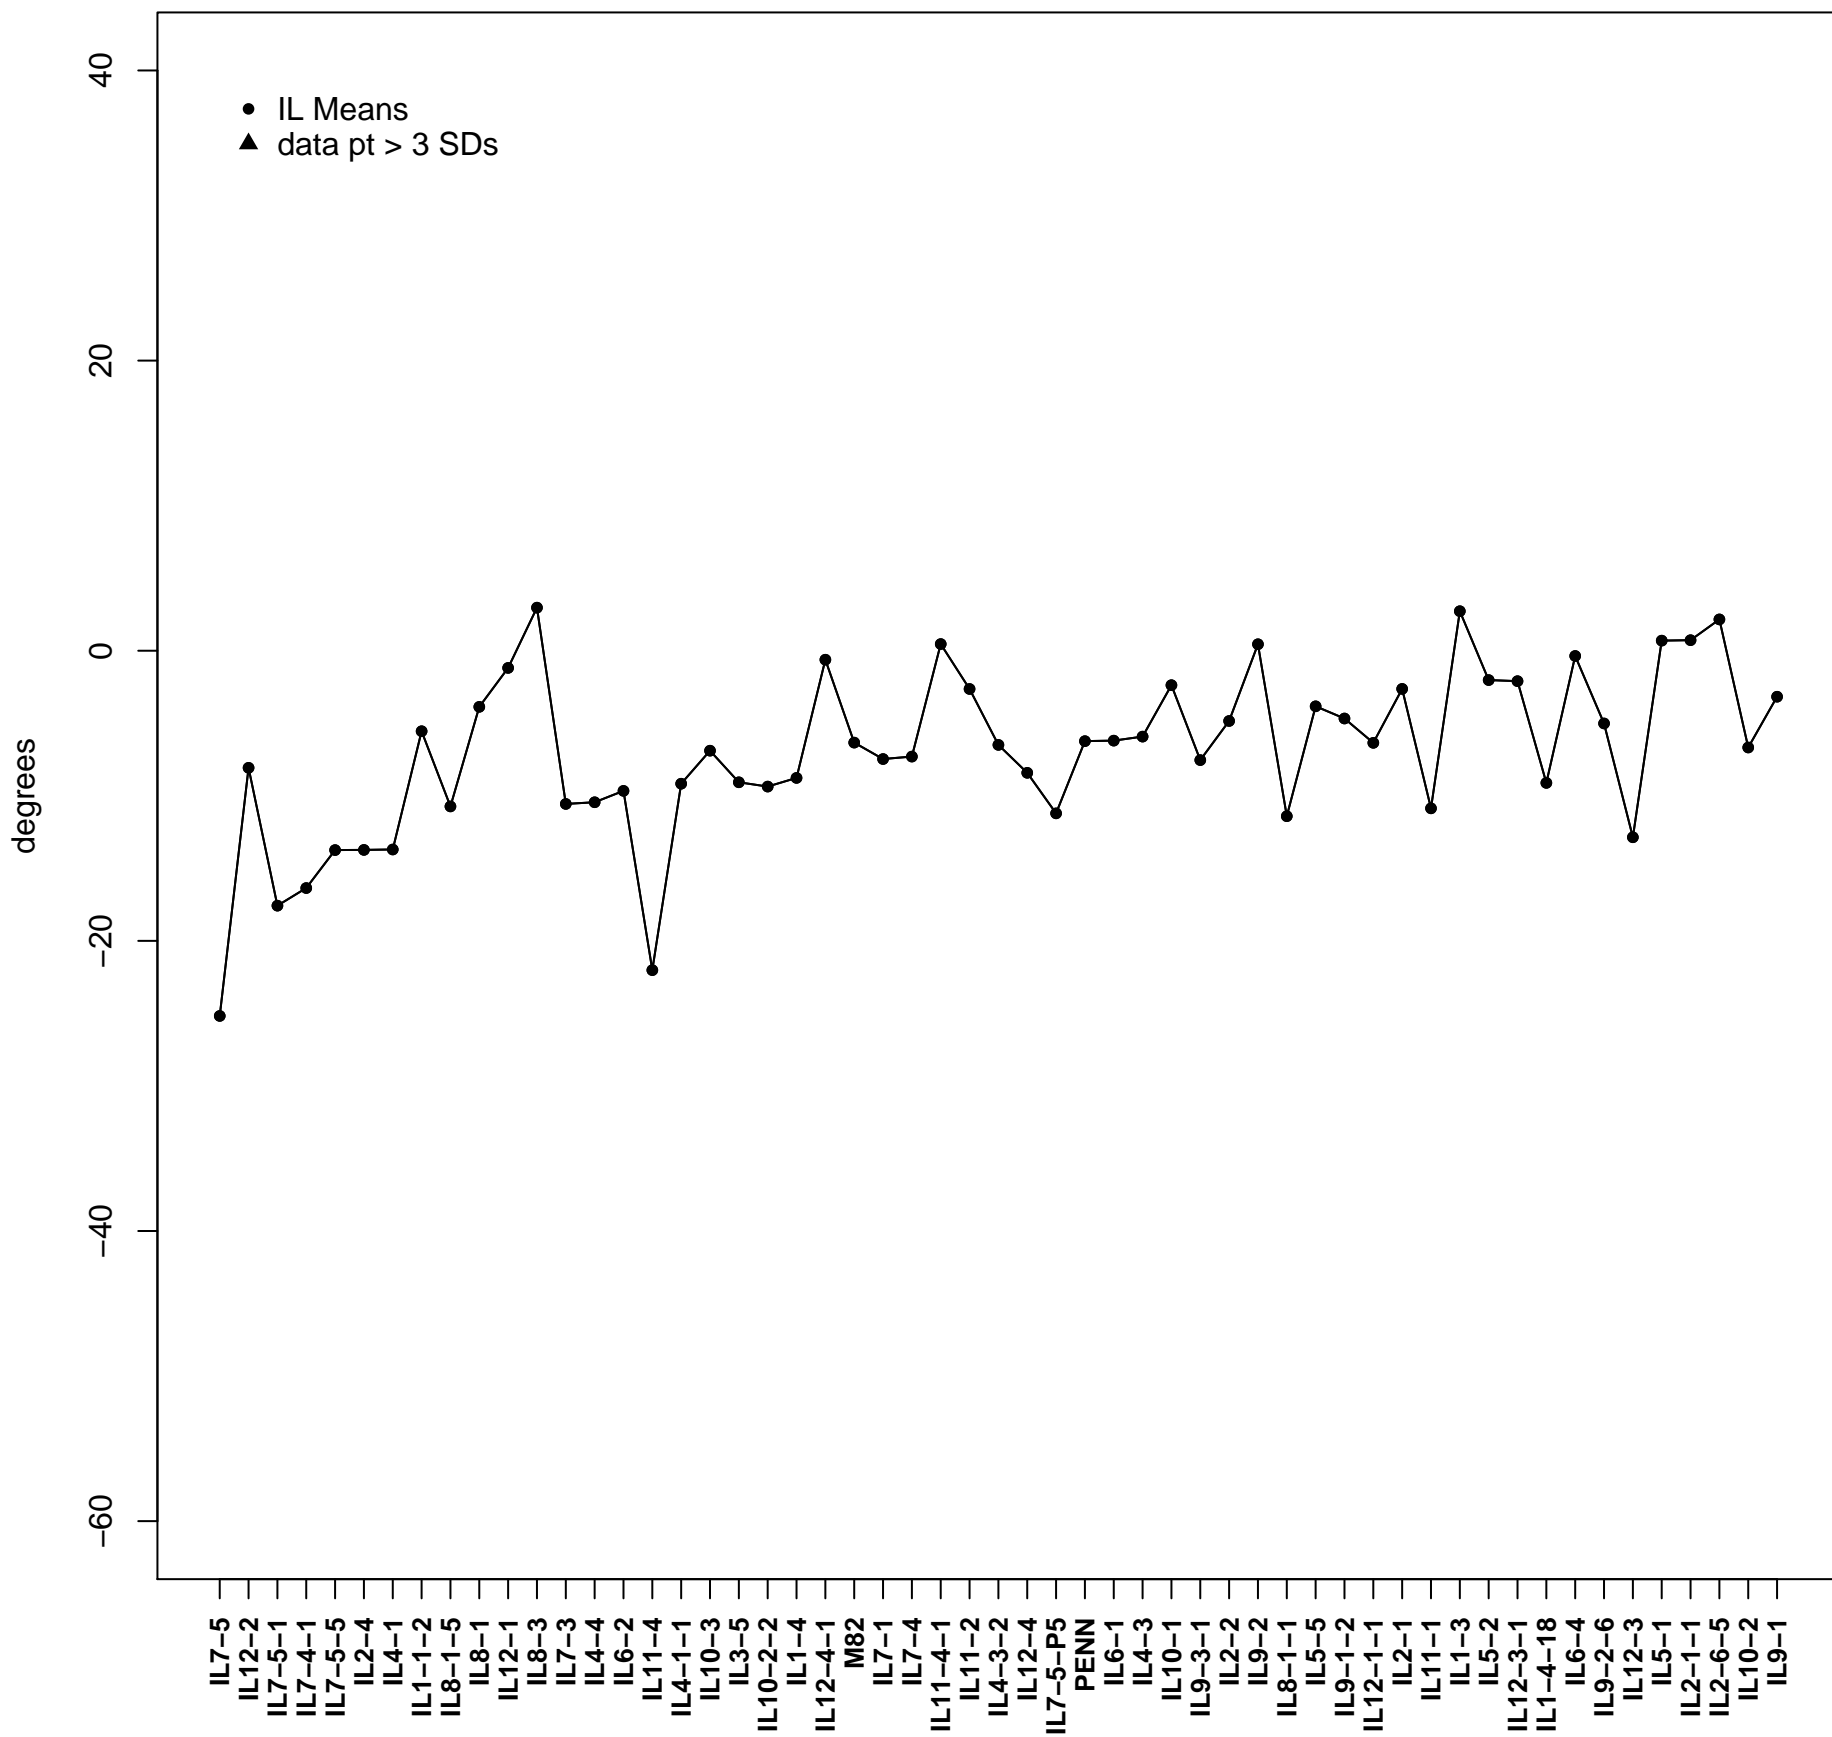

Data for trait T5

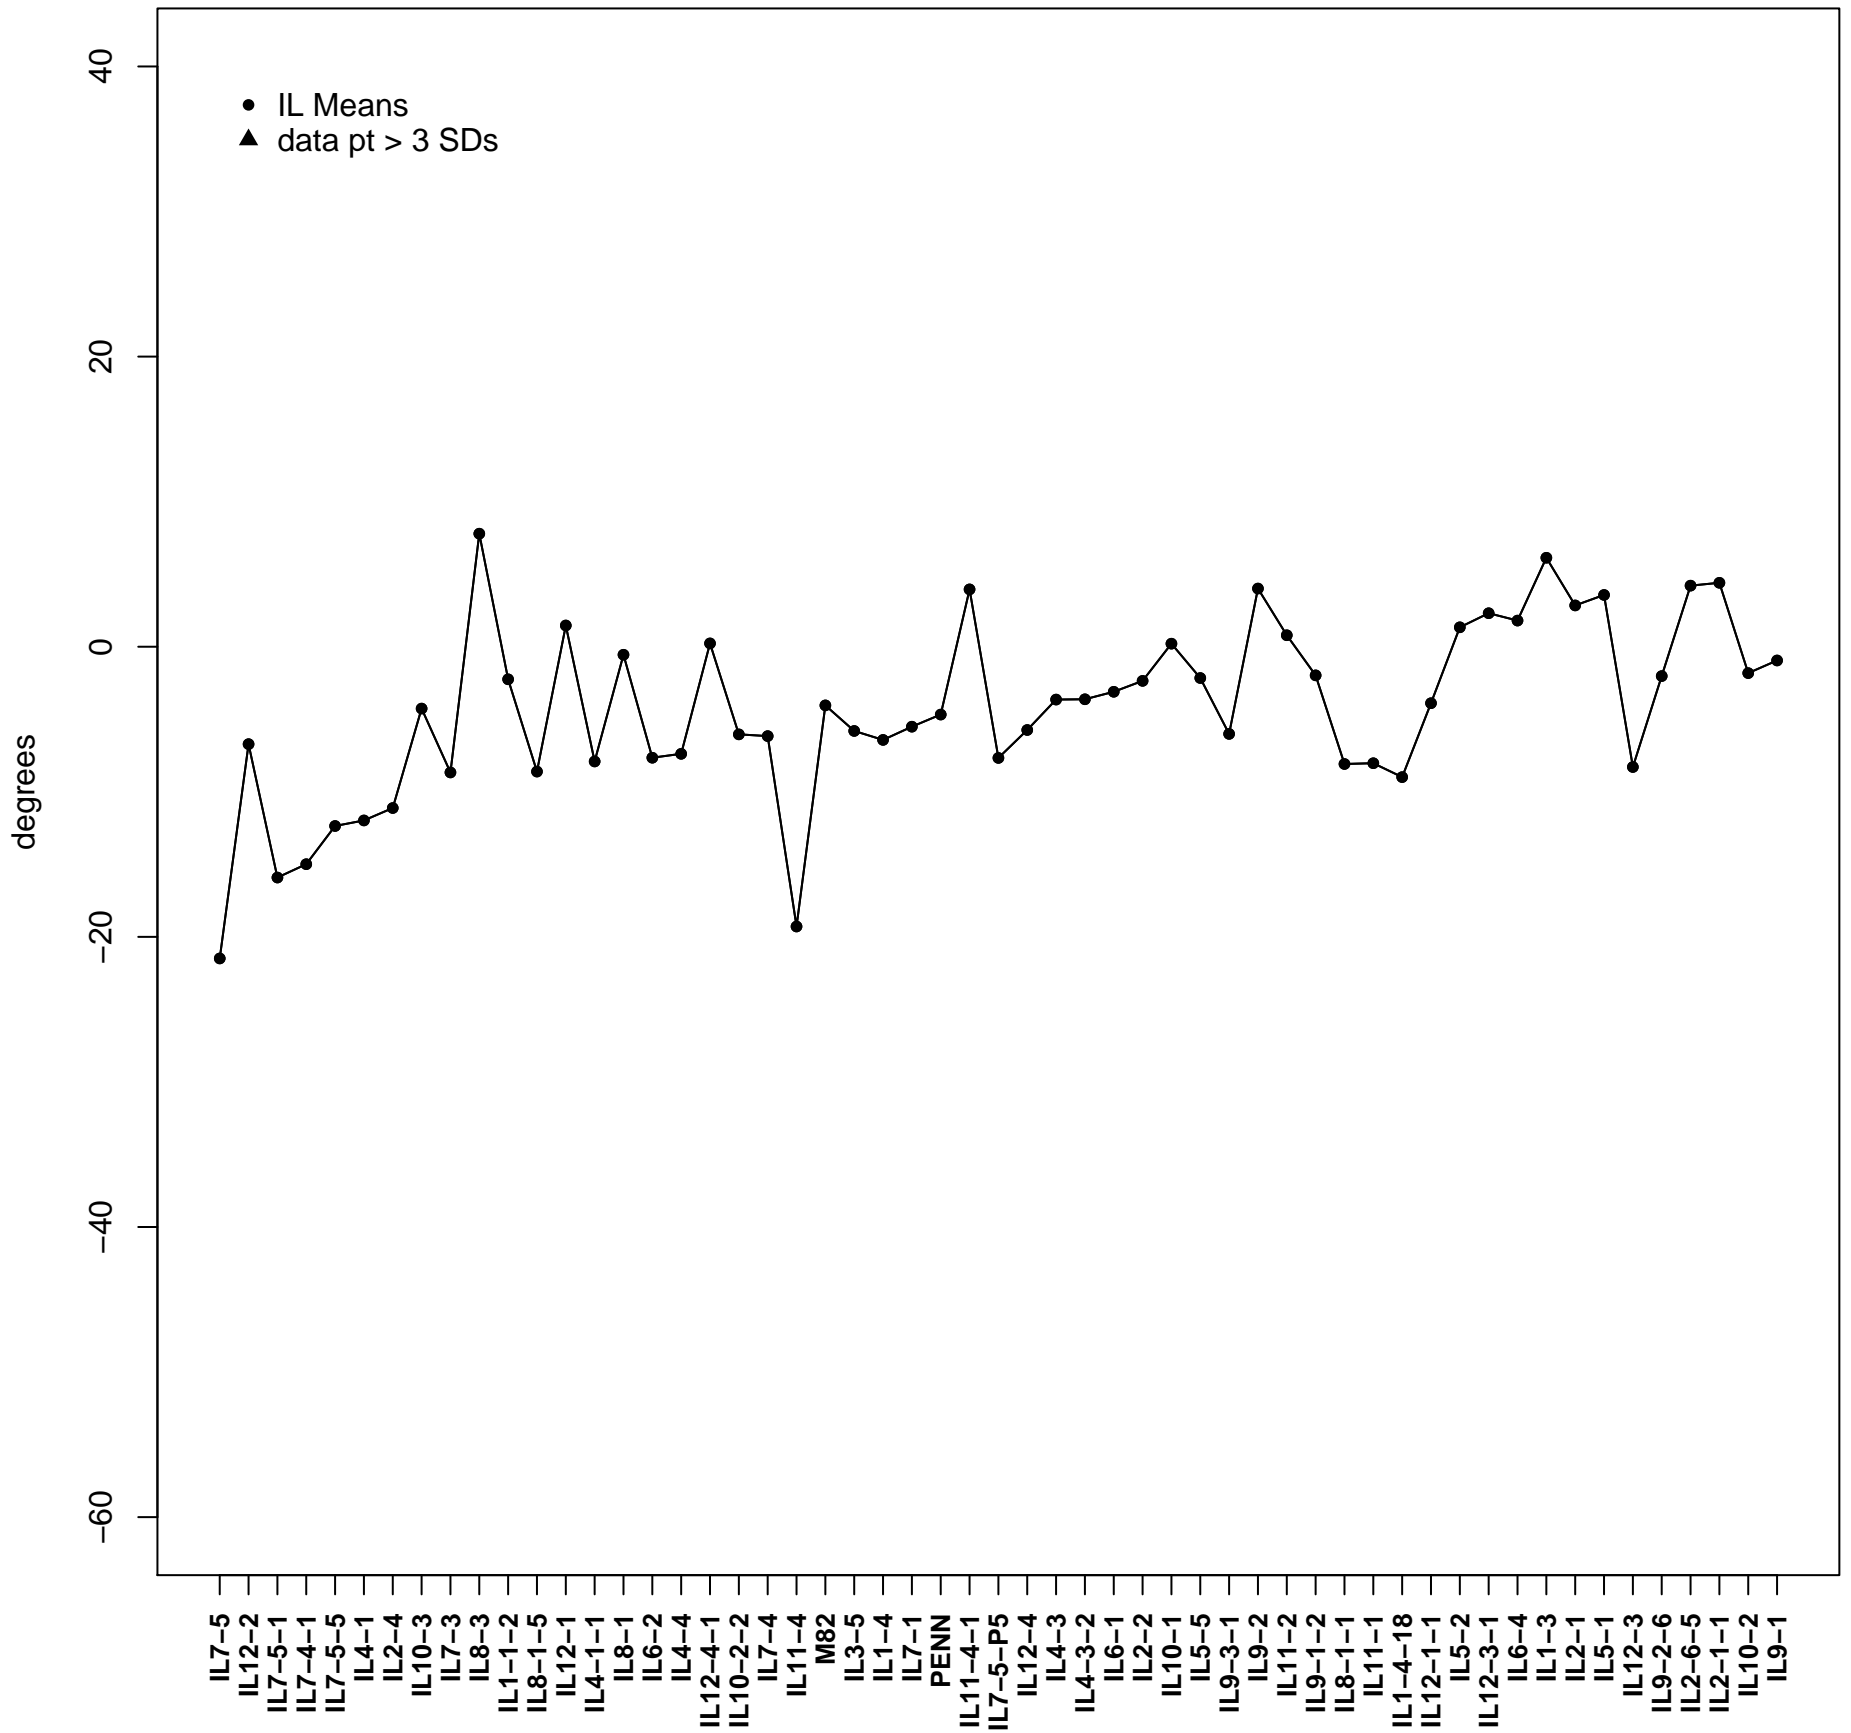

Data for trait T6

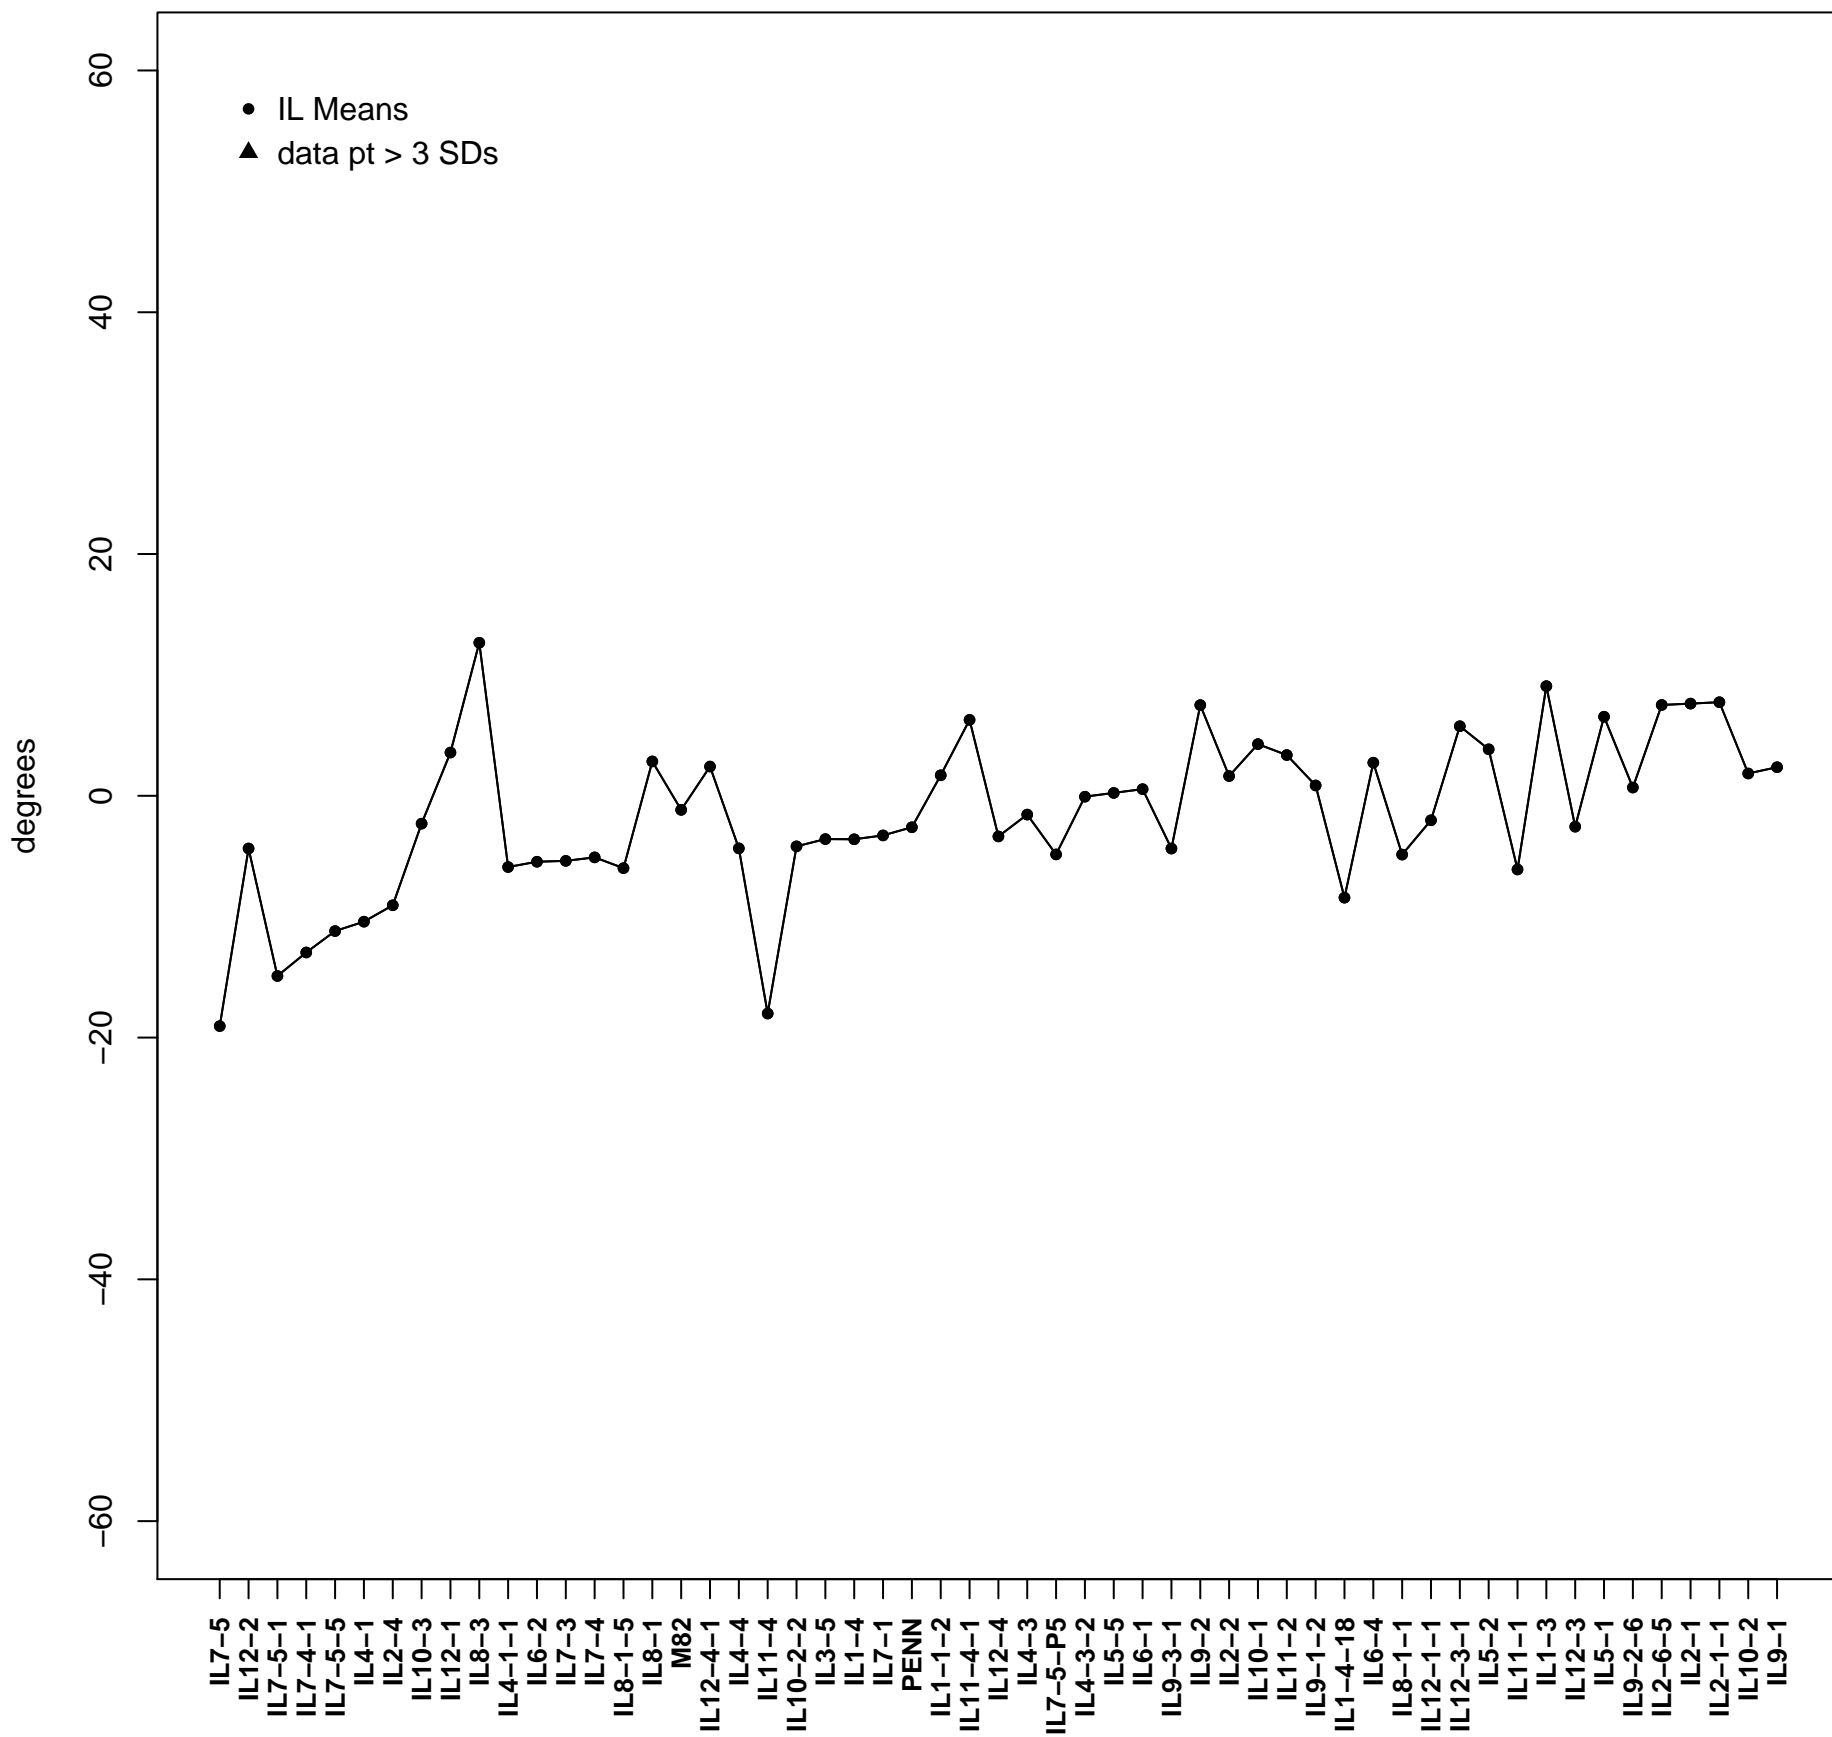

Data for trait T7

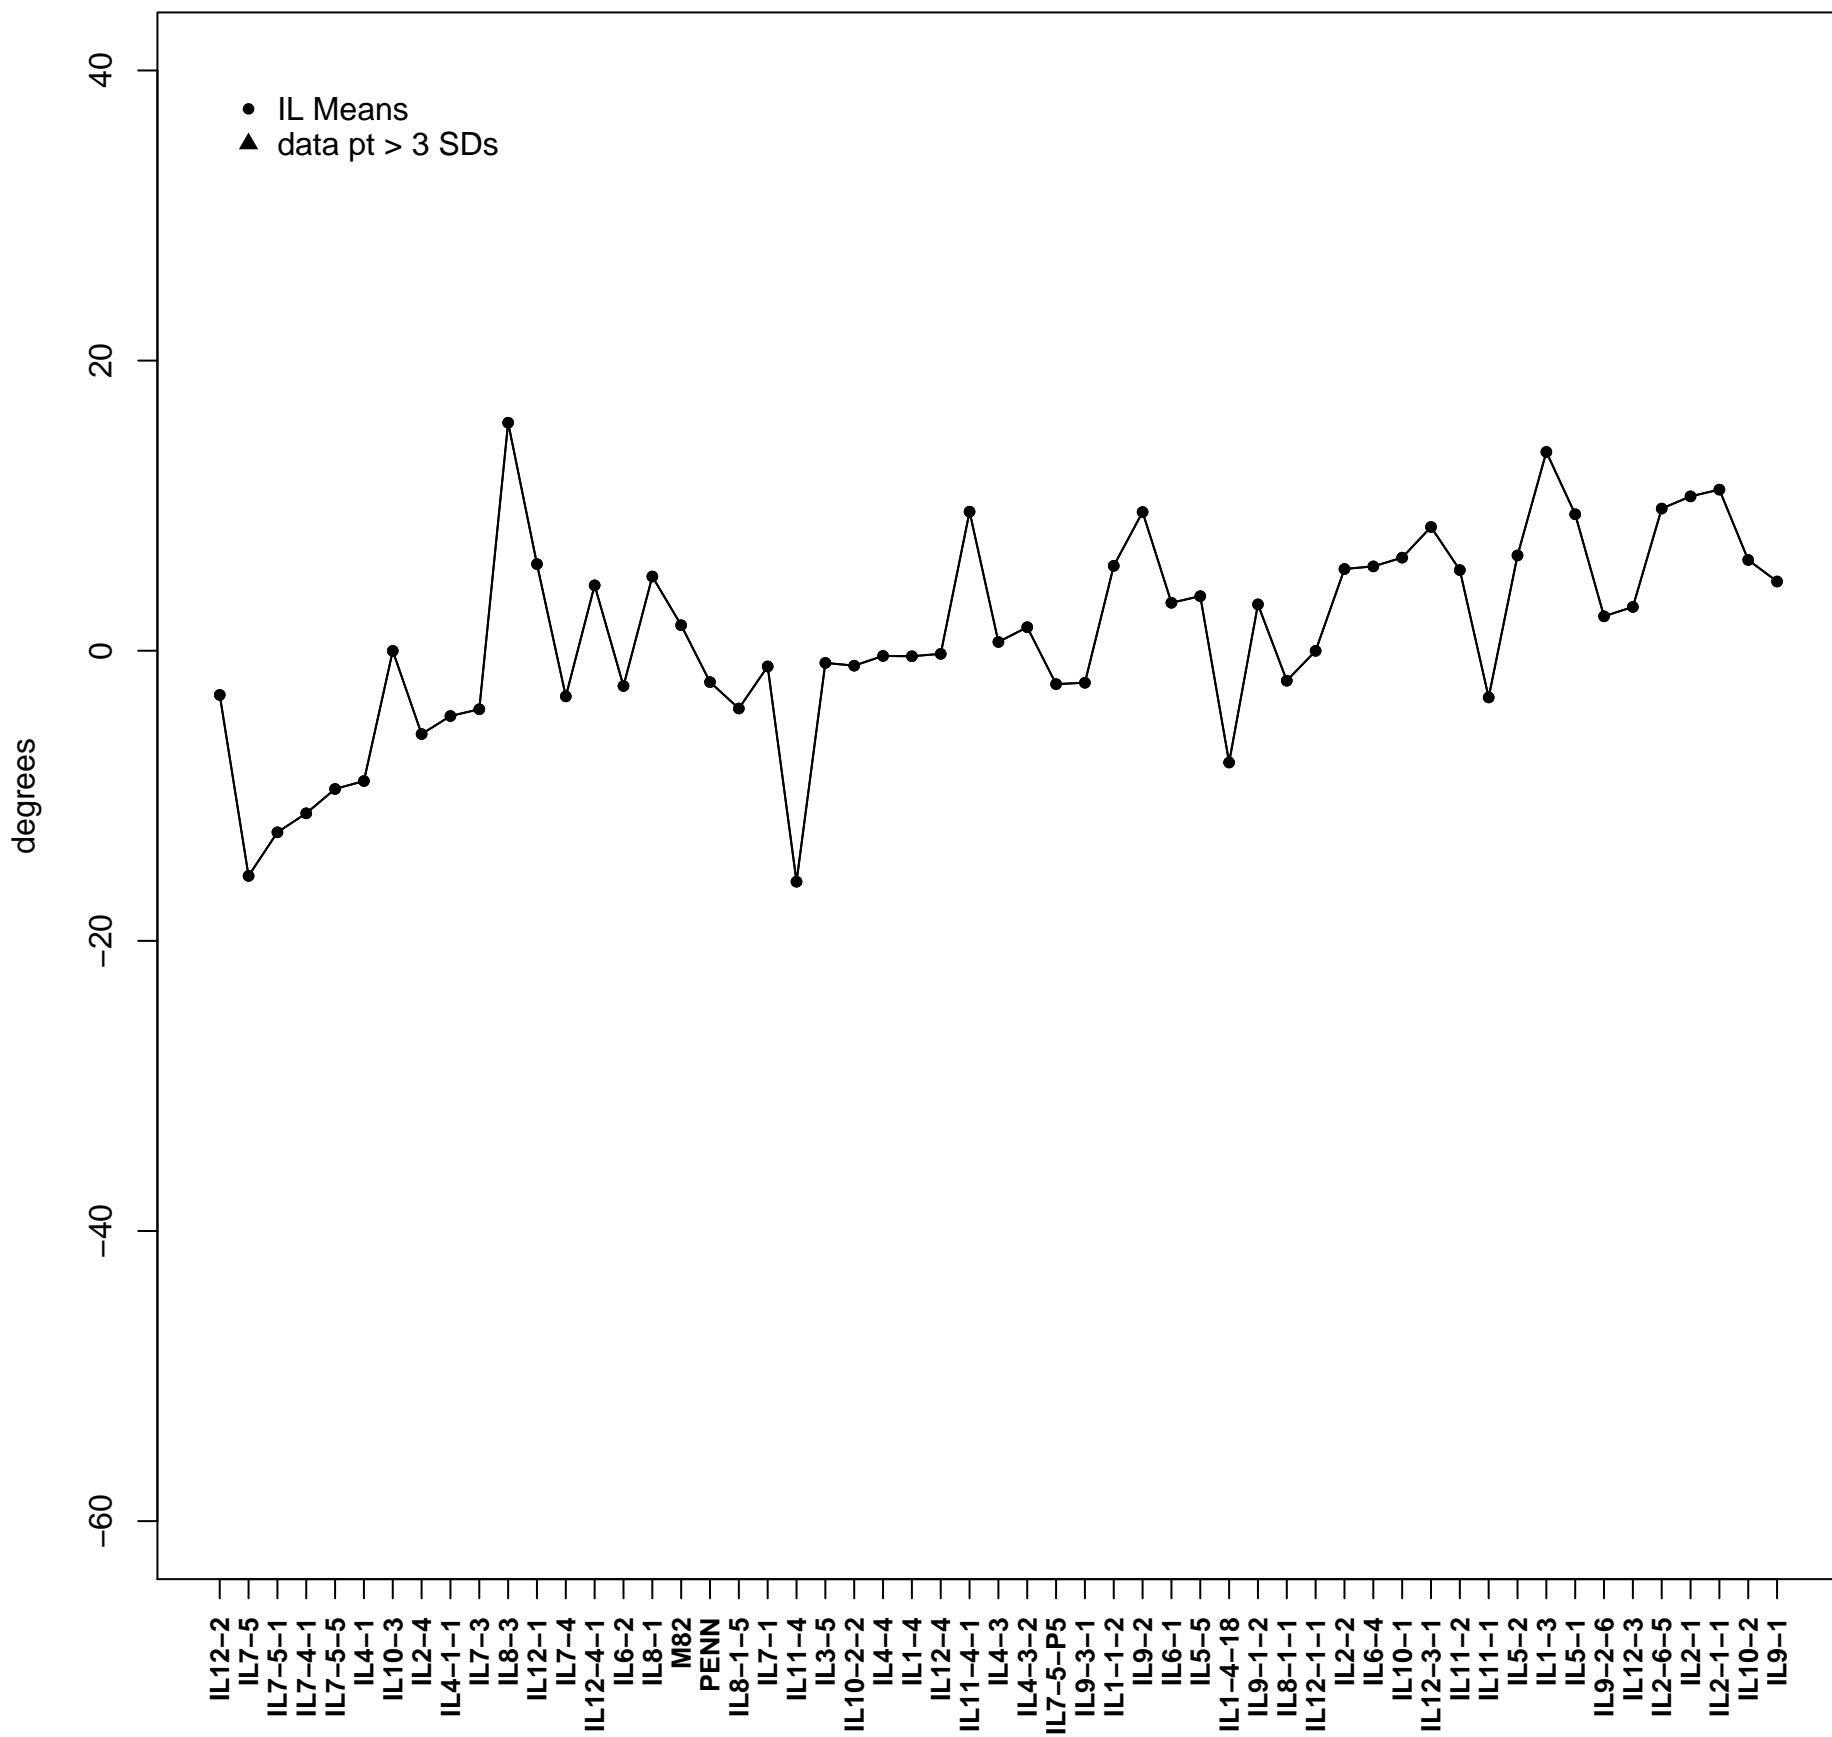



Data for trait T8

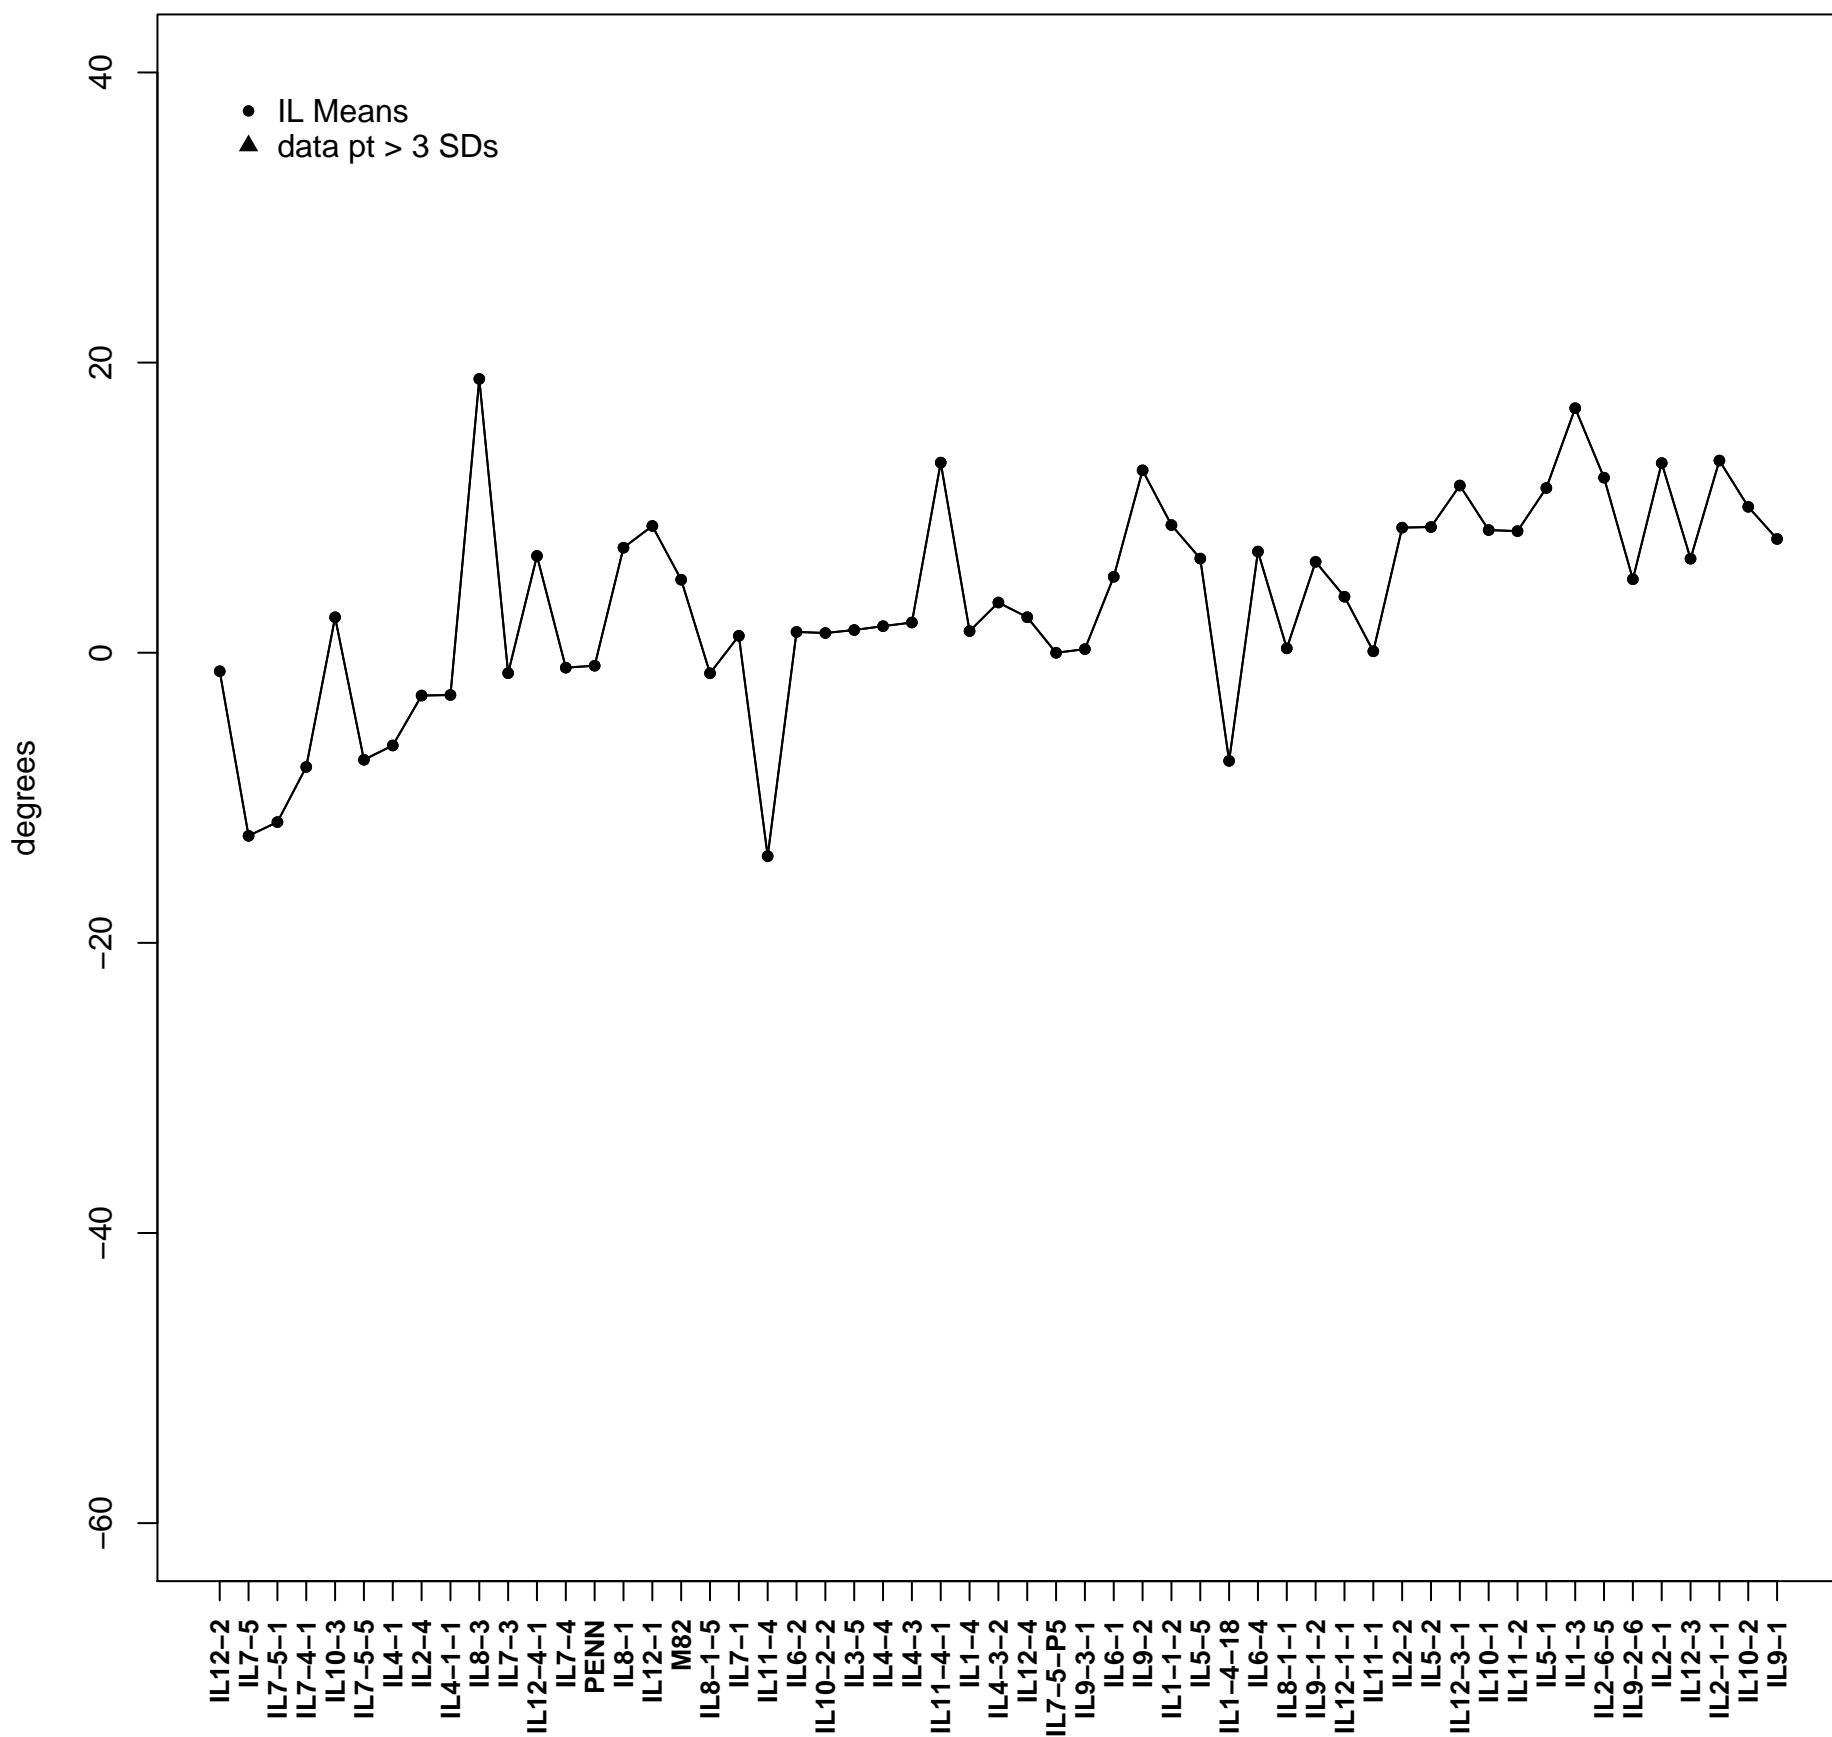

Data for trait T9

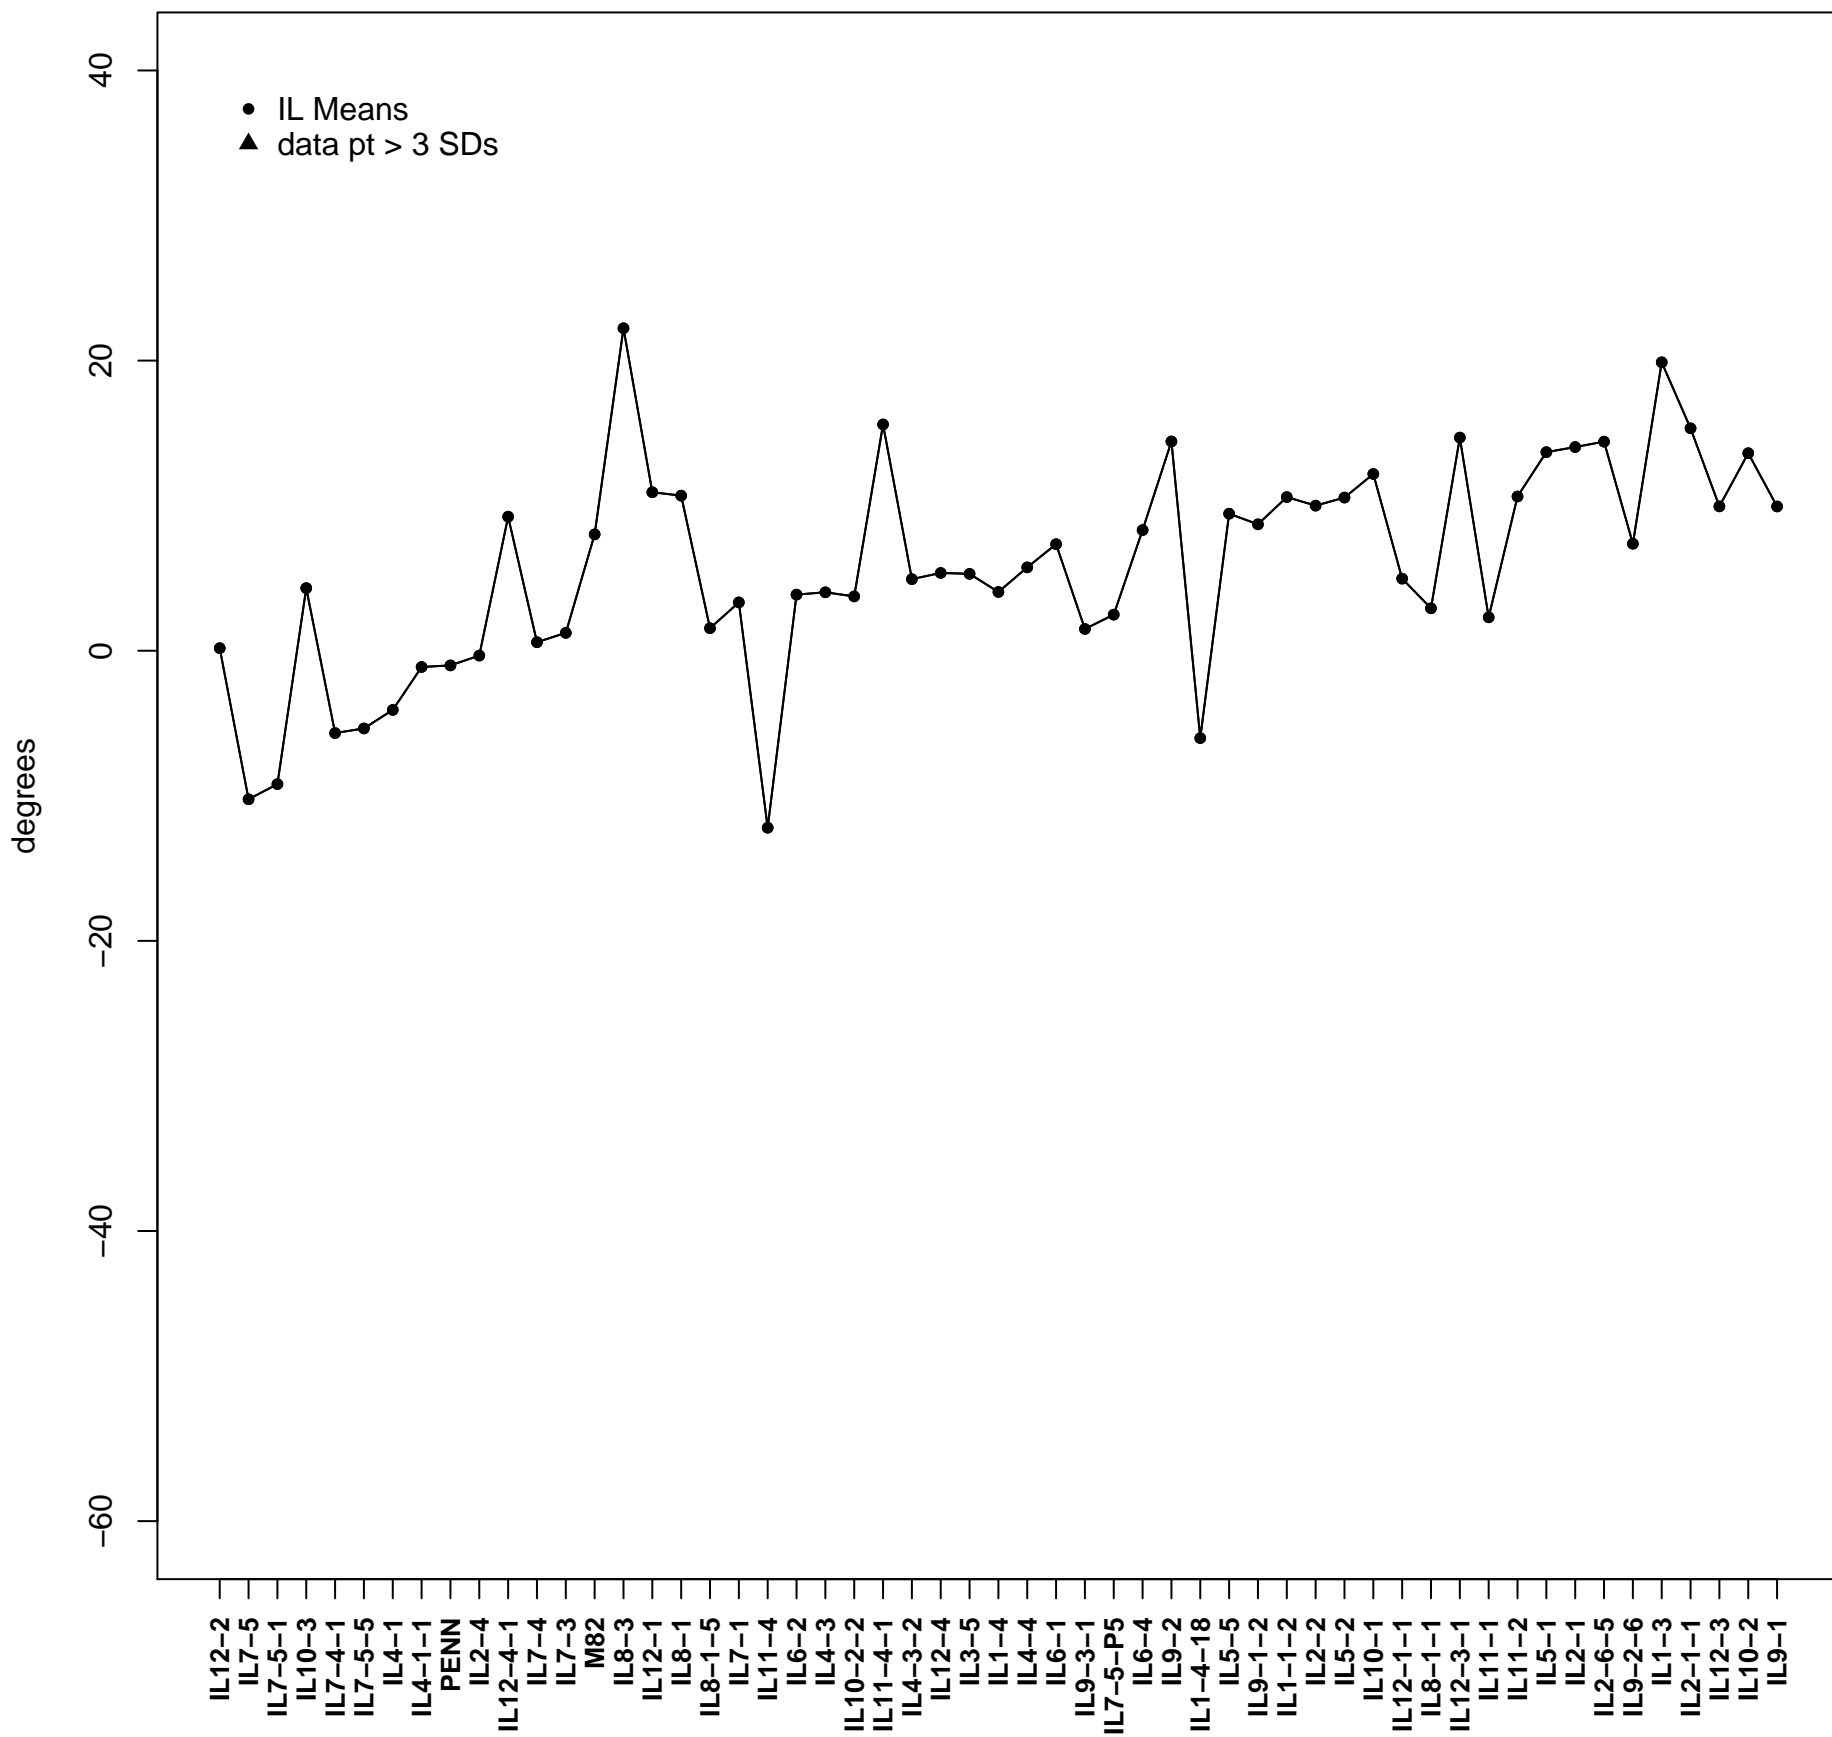

Data for trait T10

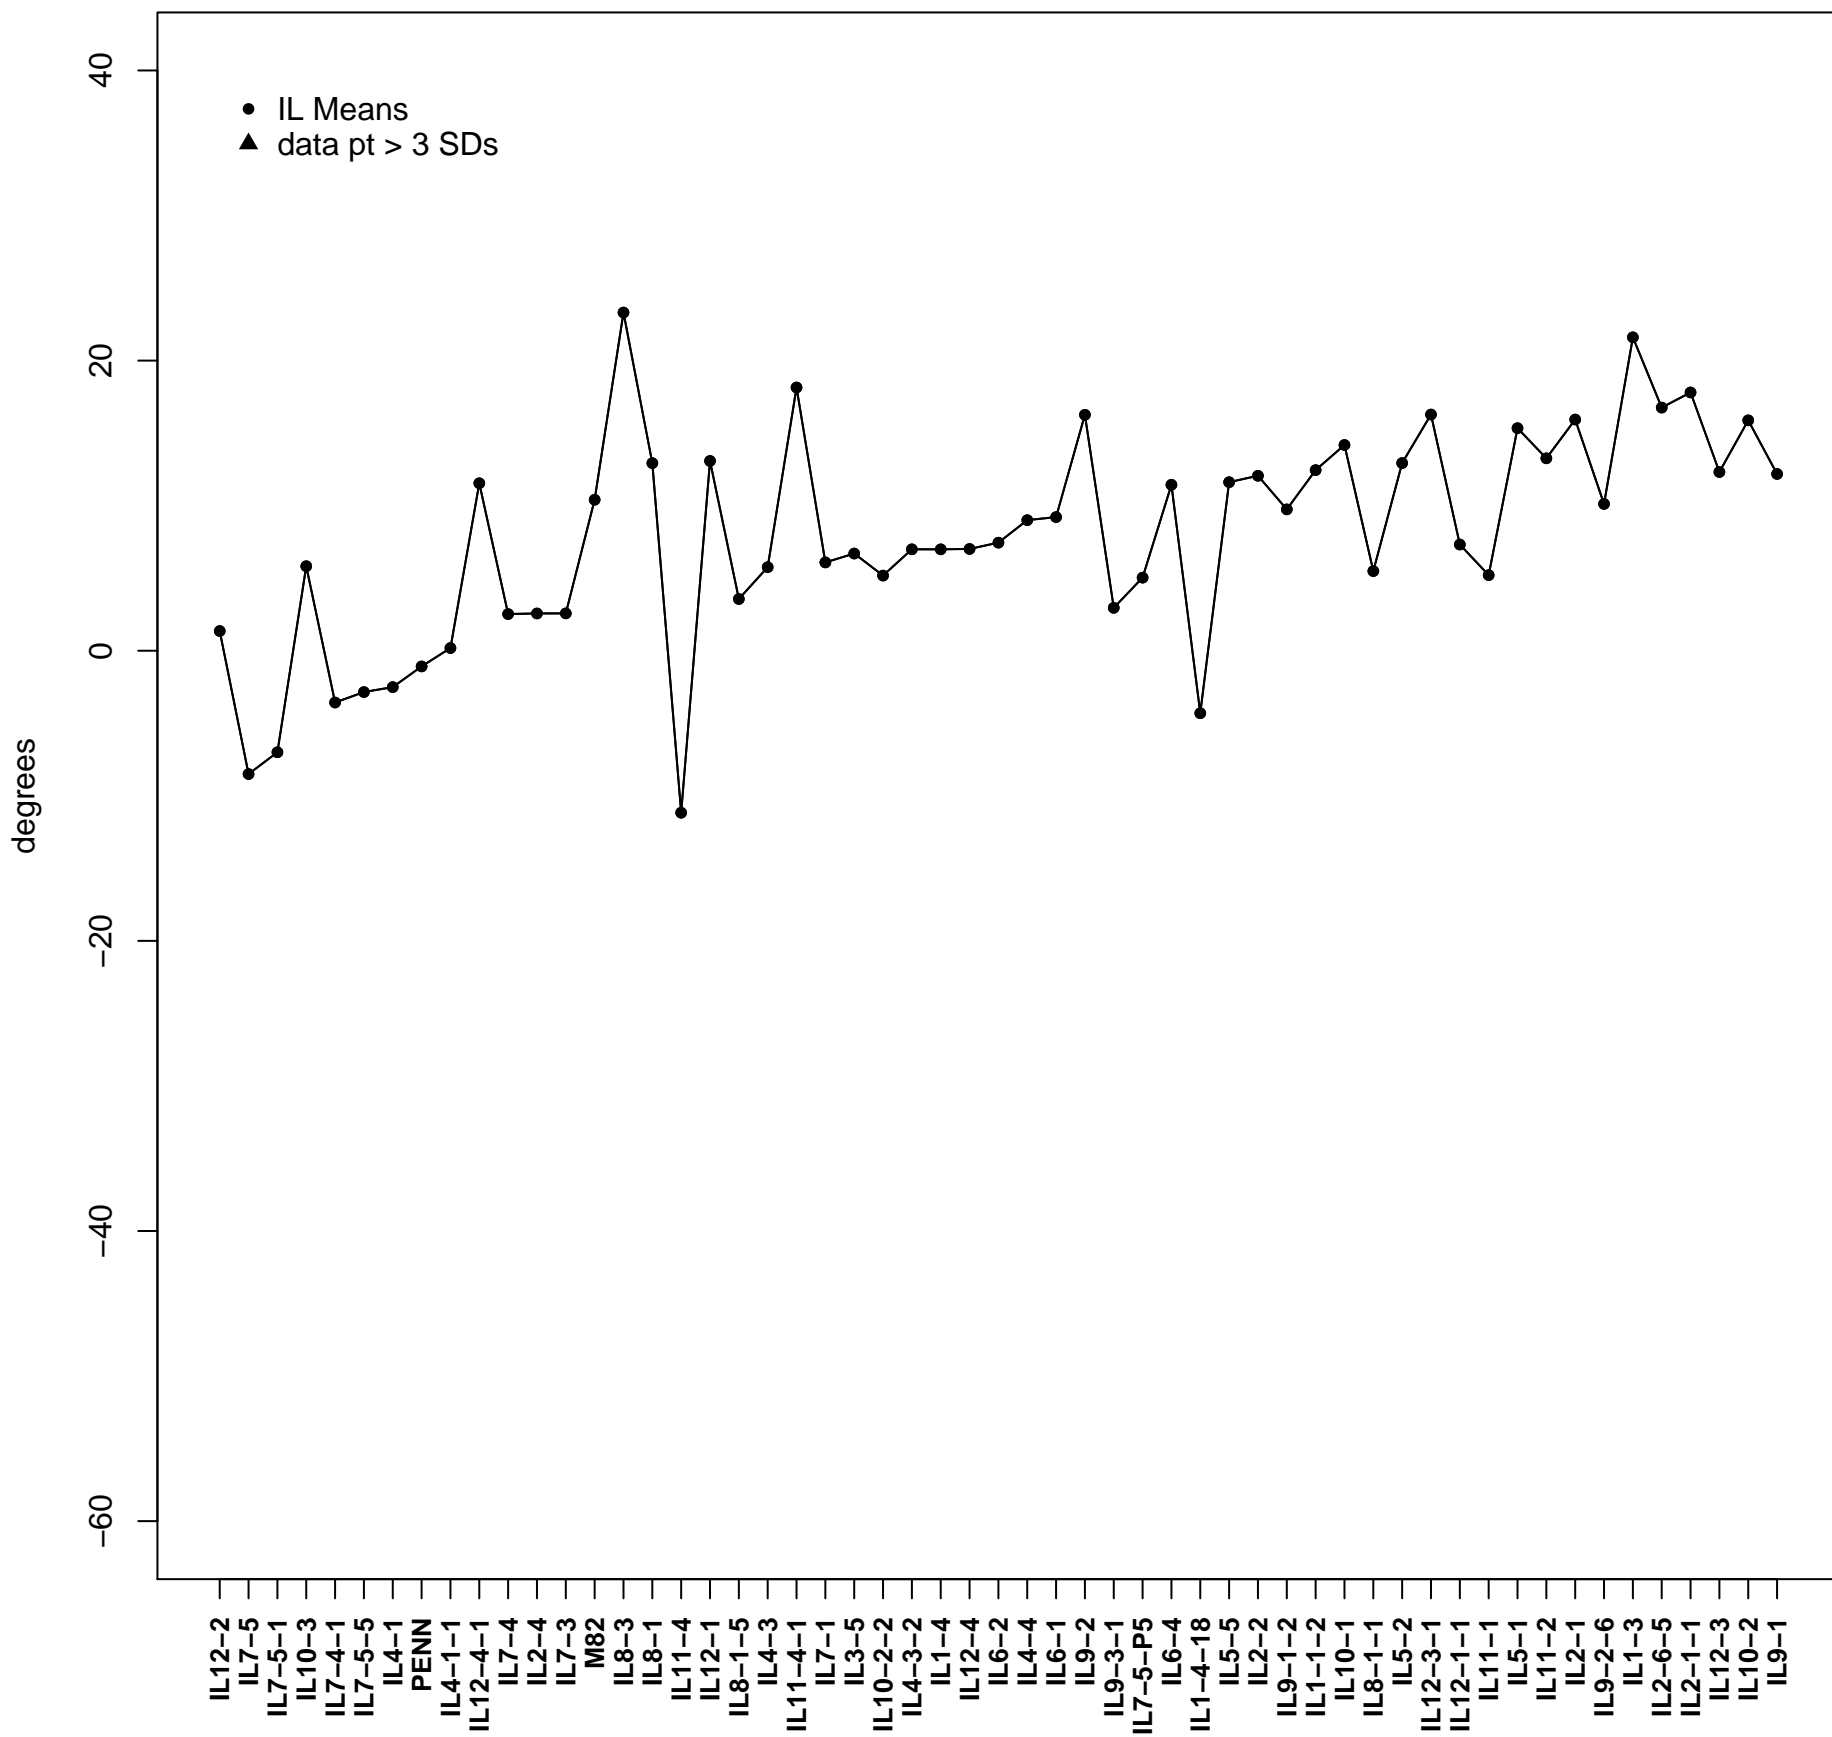

Data for trait T11

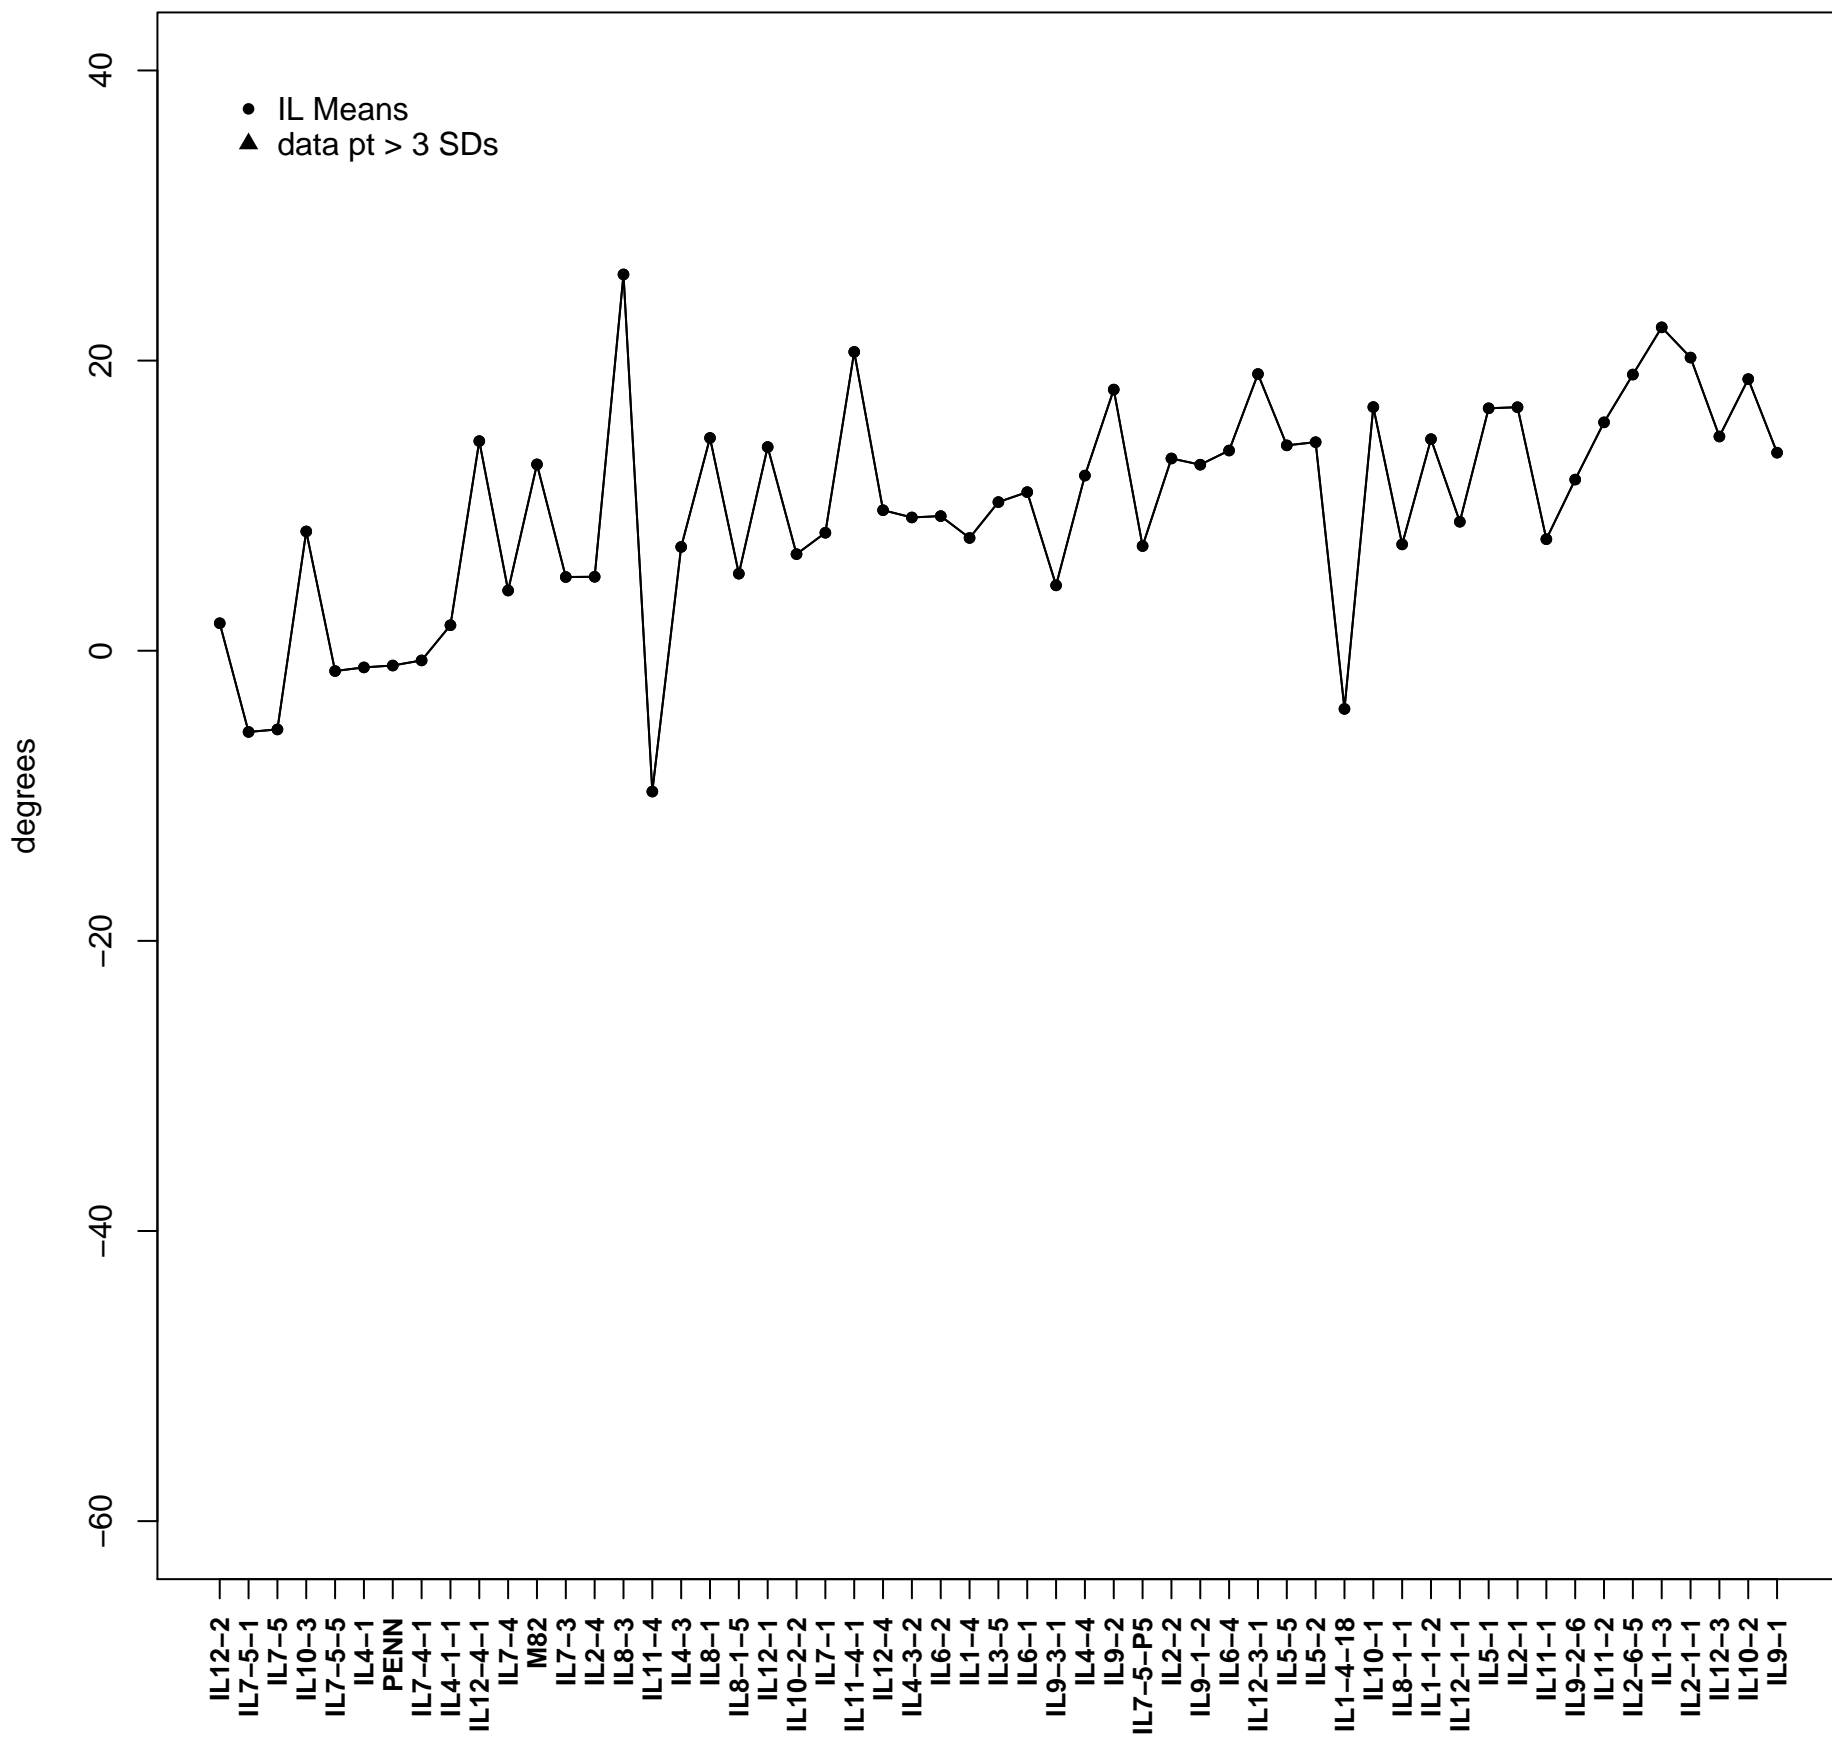

Data for trait T12

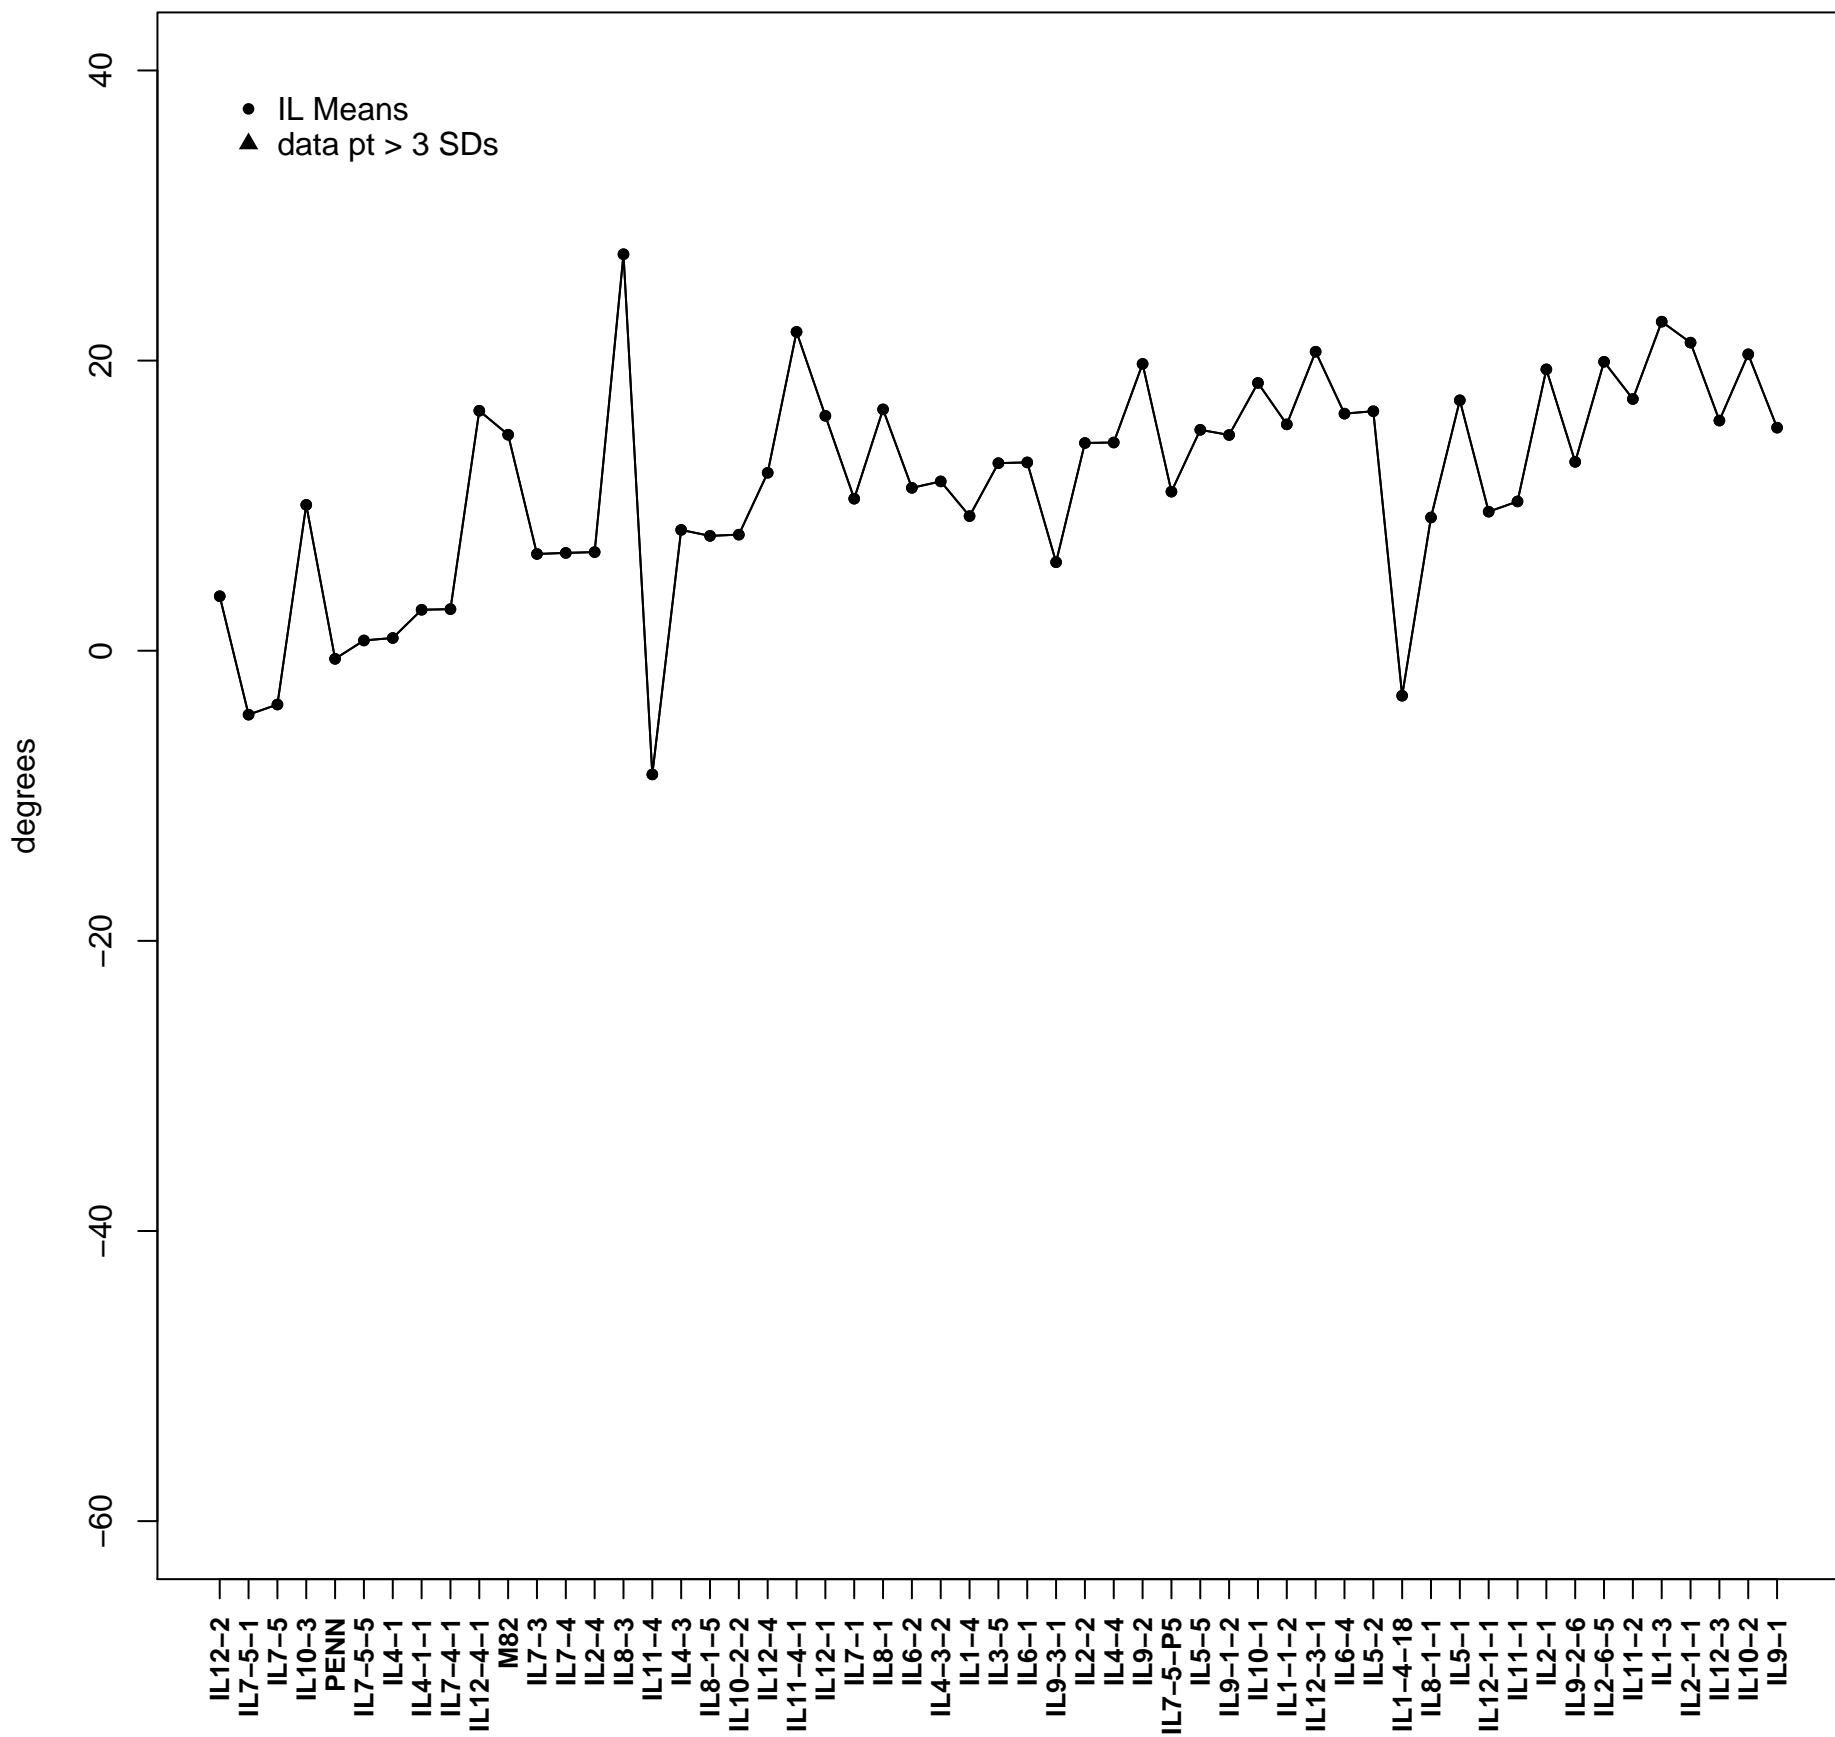

Data for trait T13

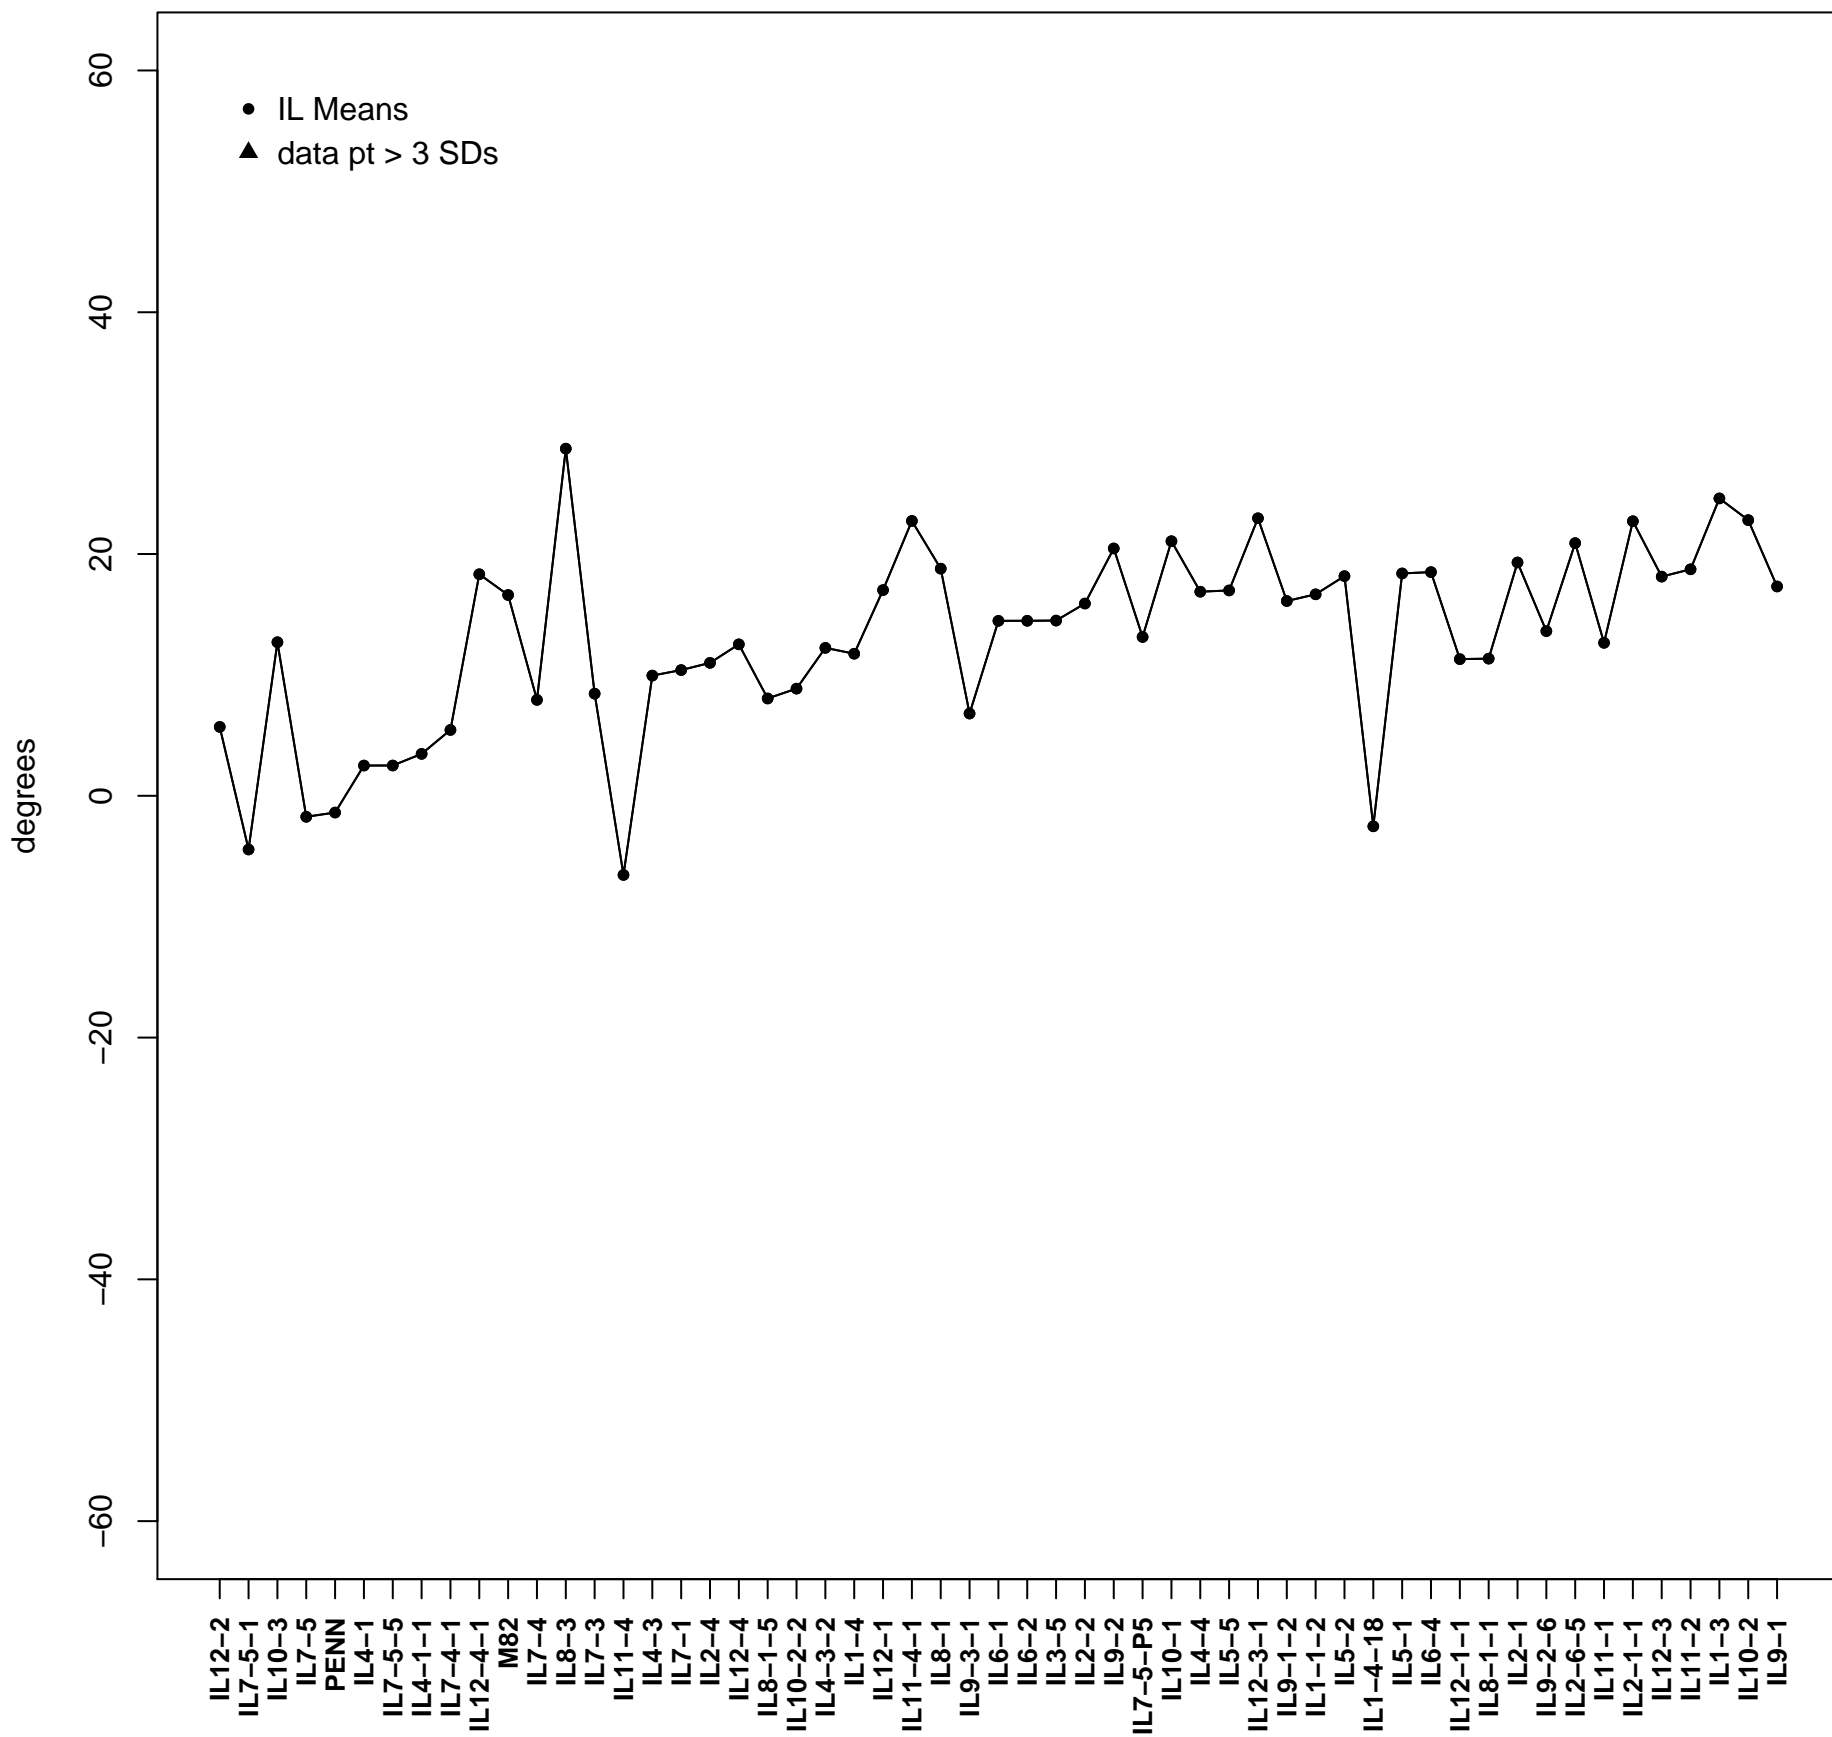

Data for trait T14

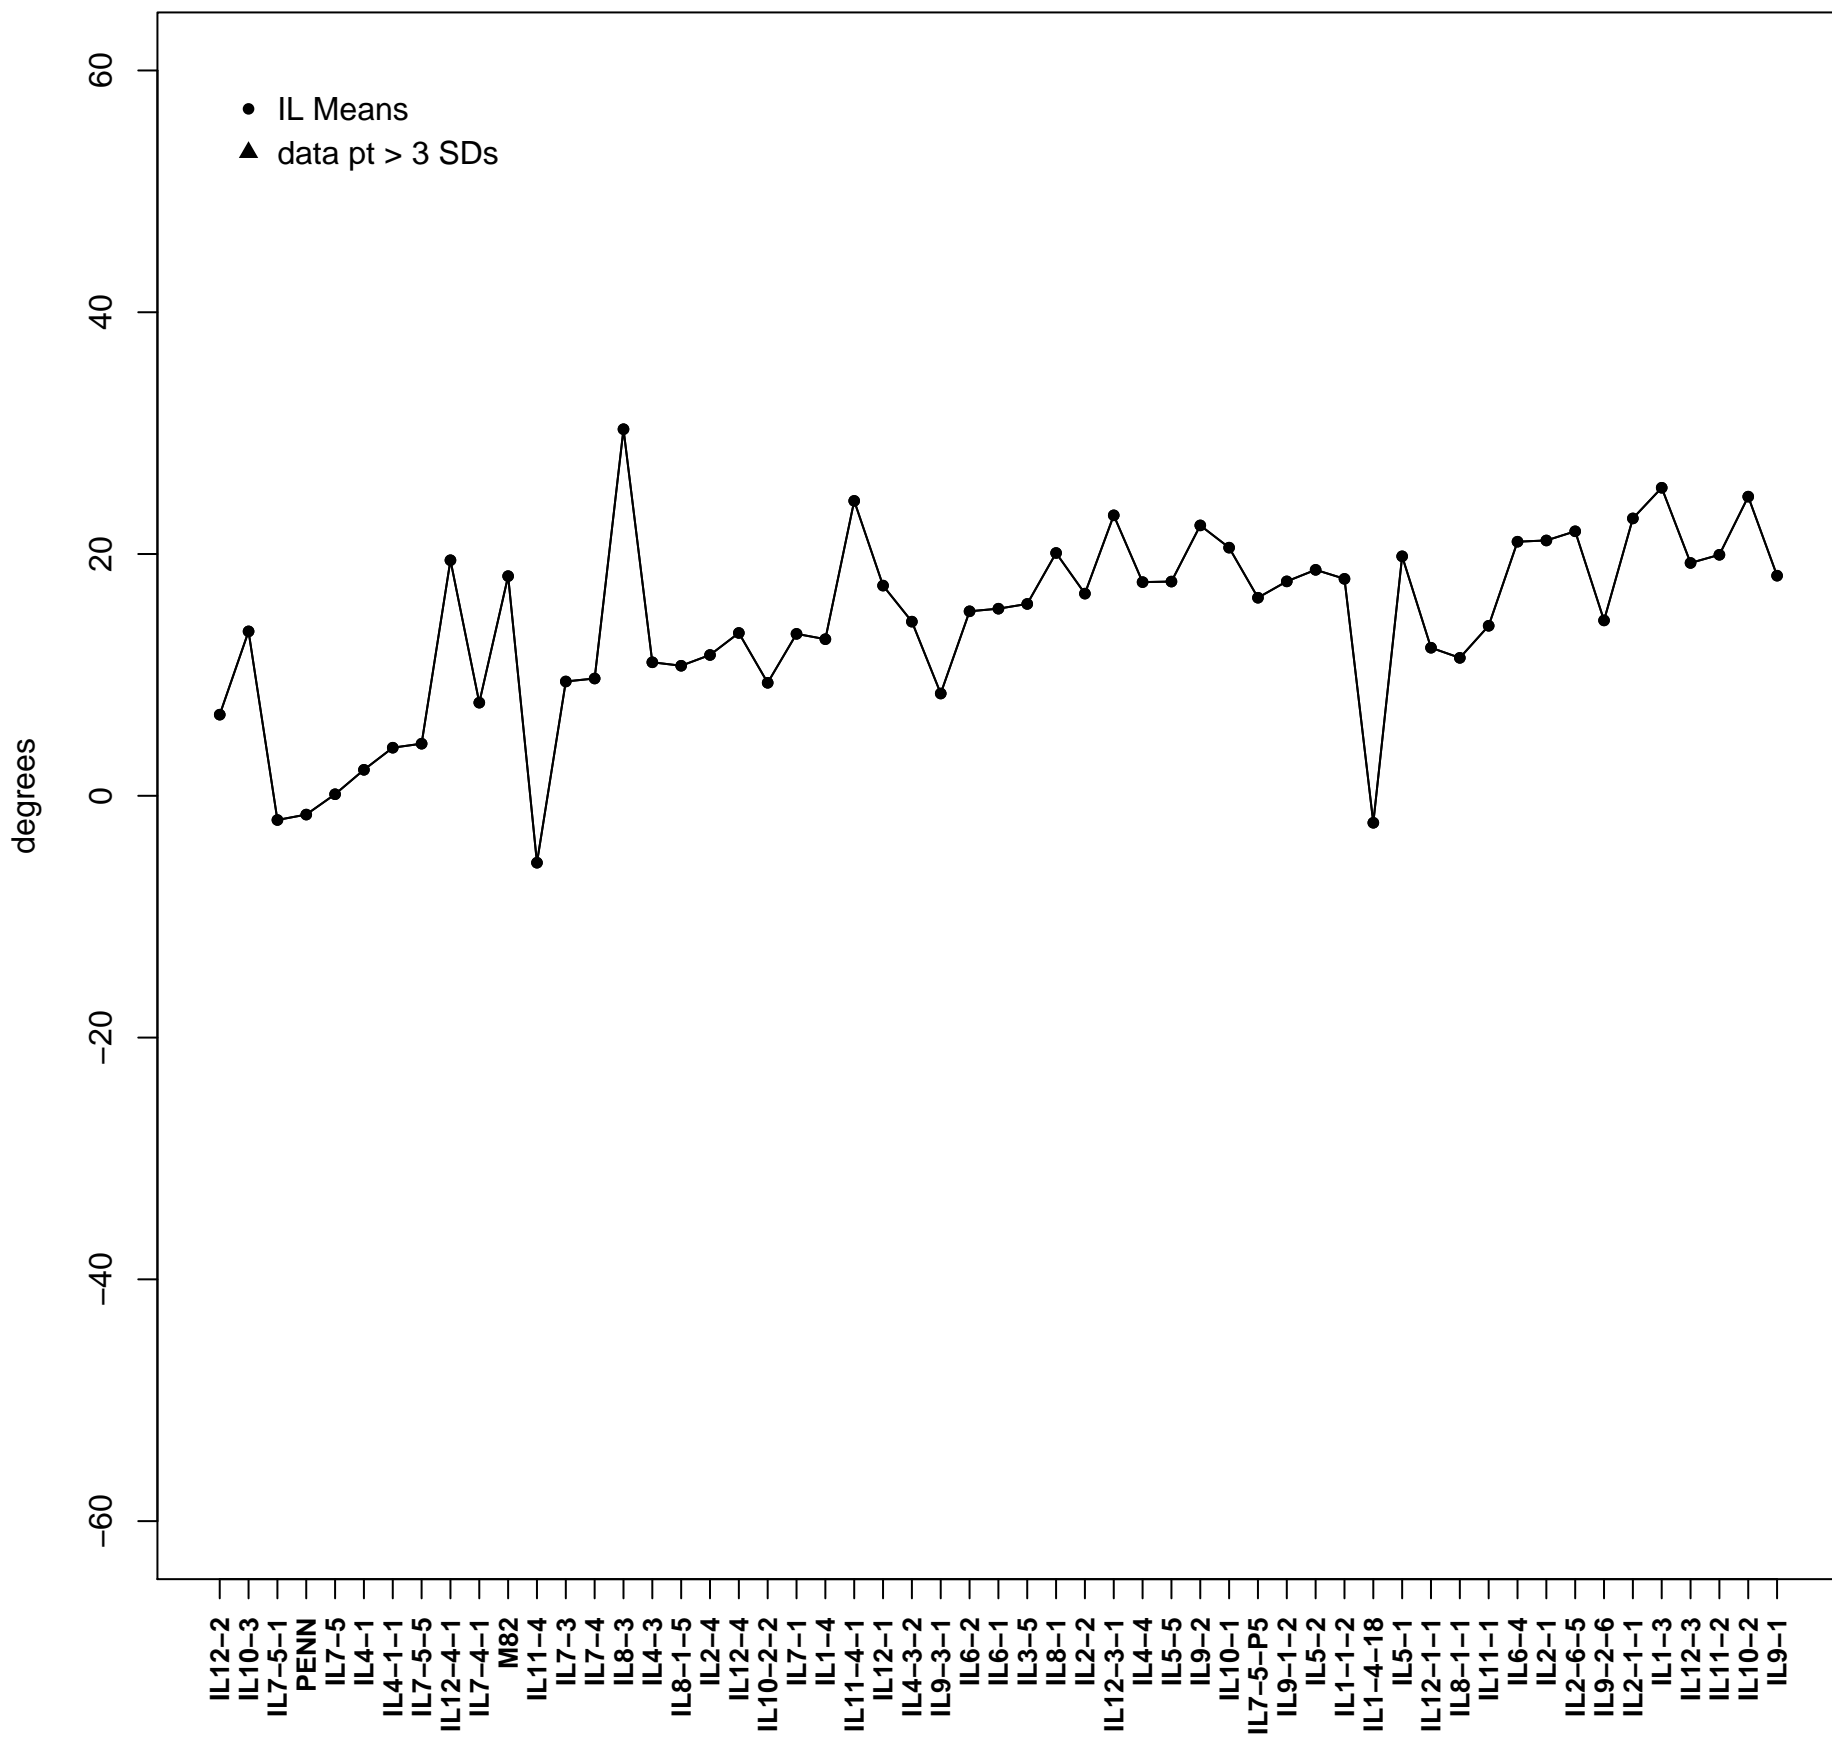

Data for trait T15

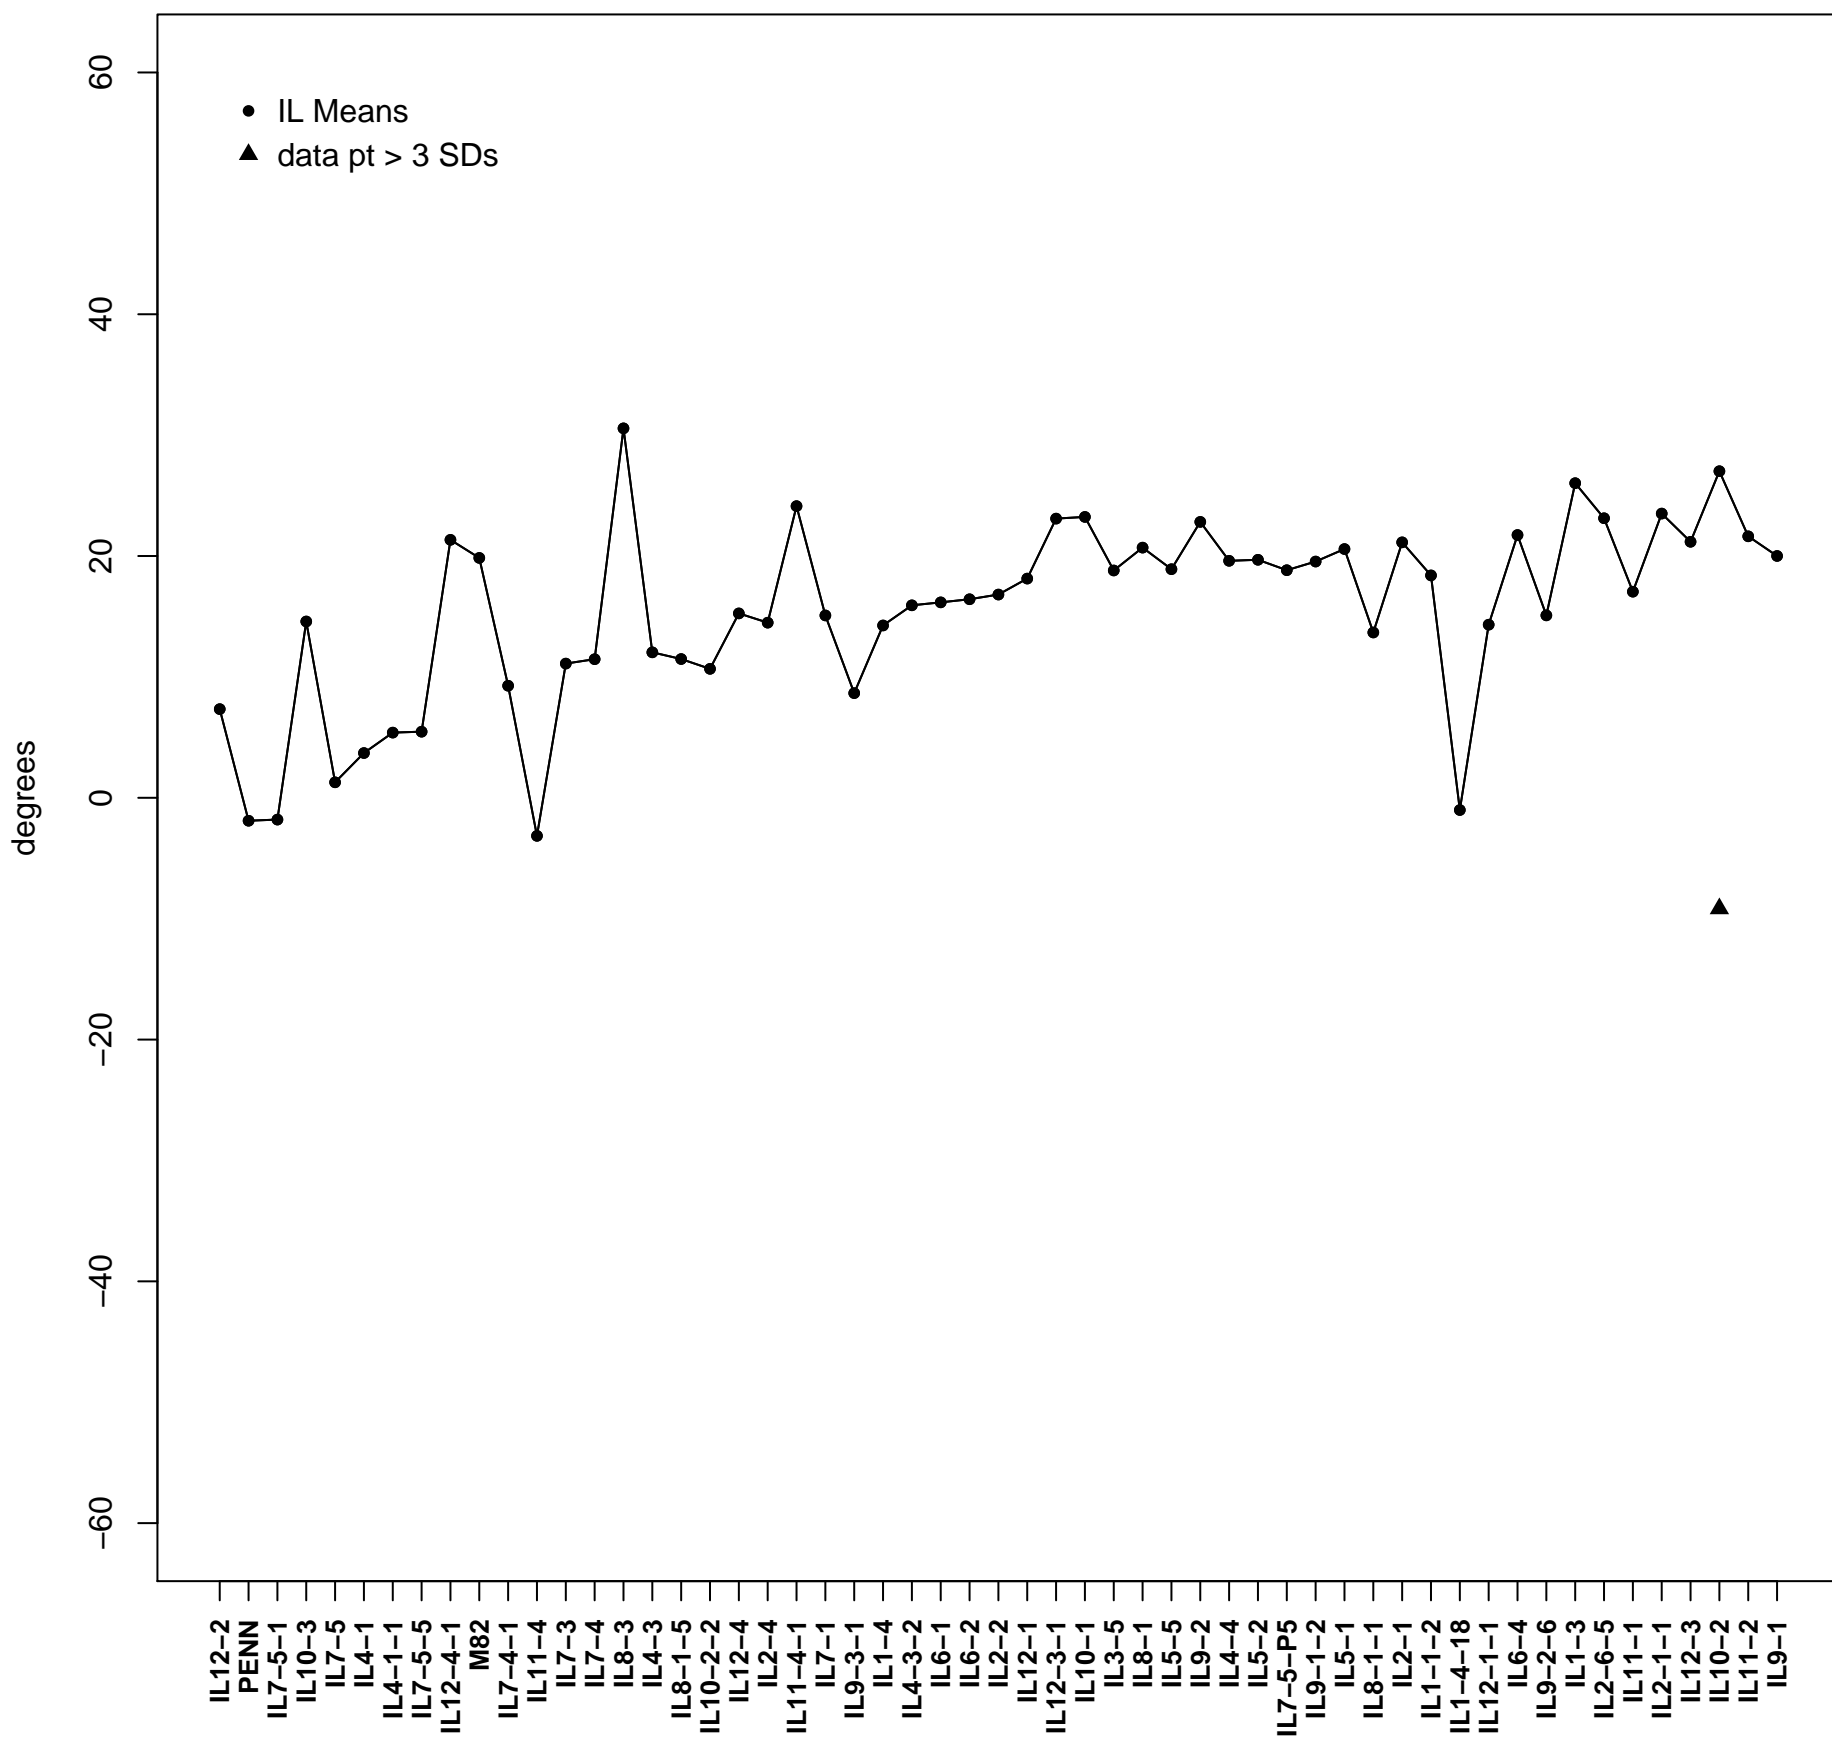



Data for trait T16

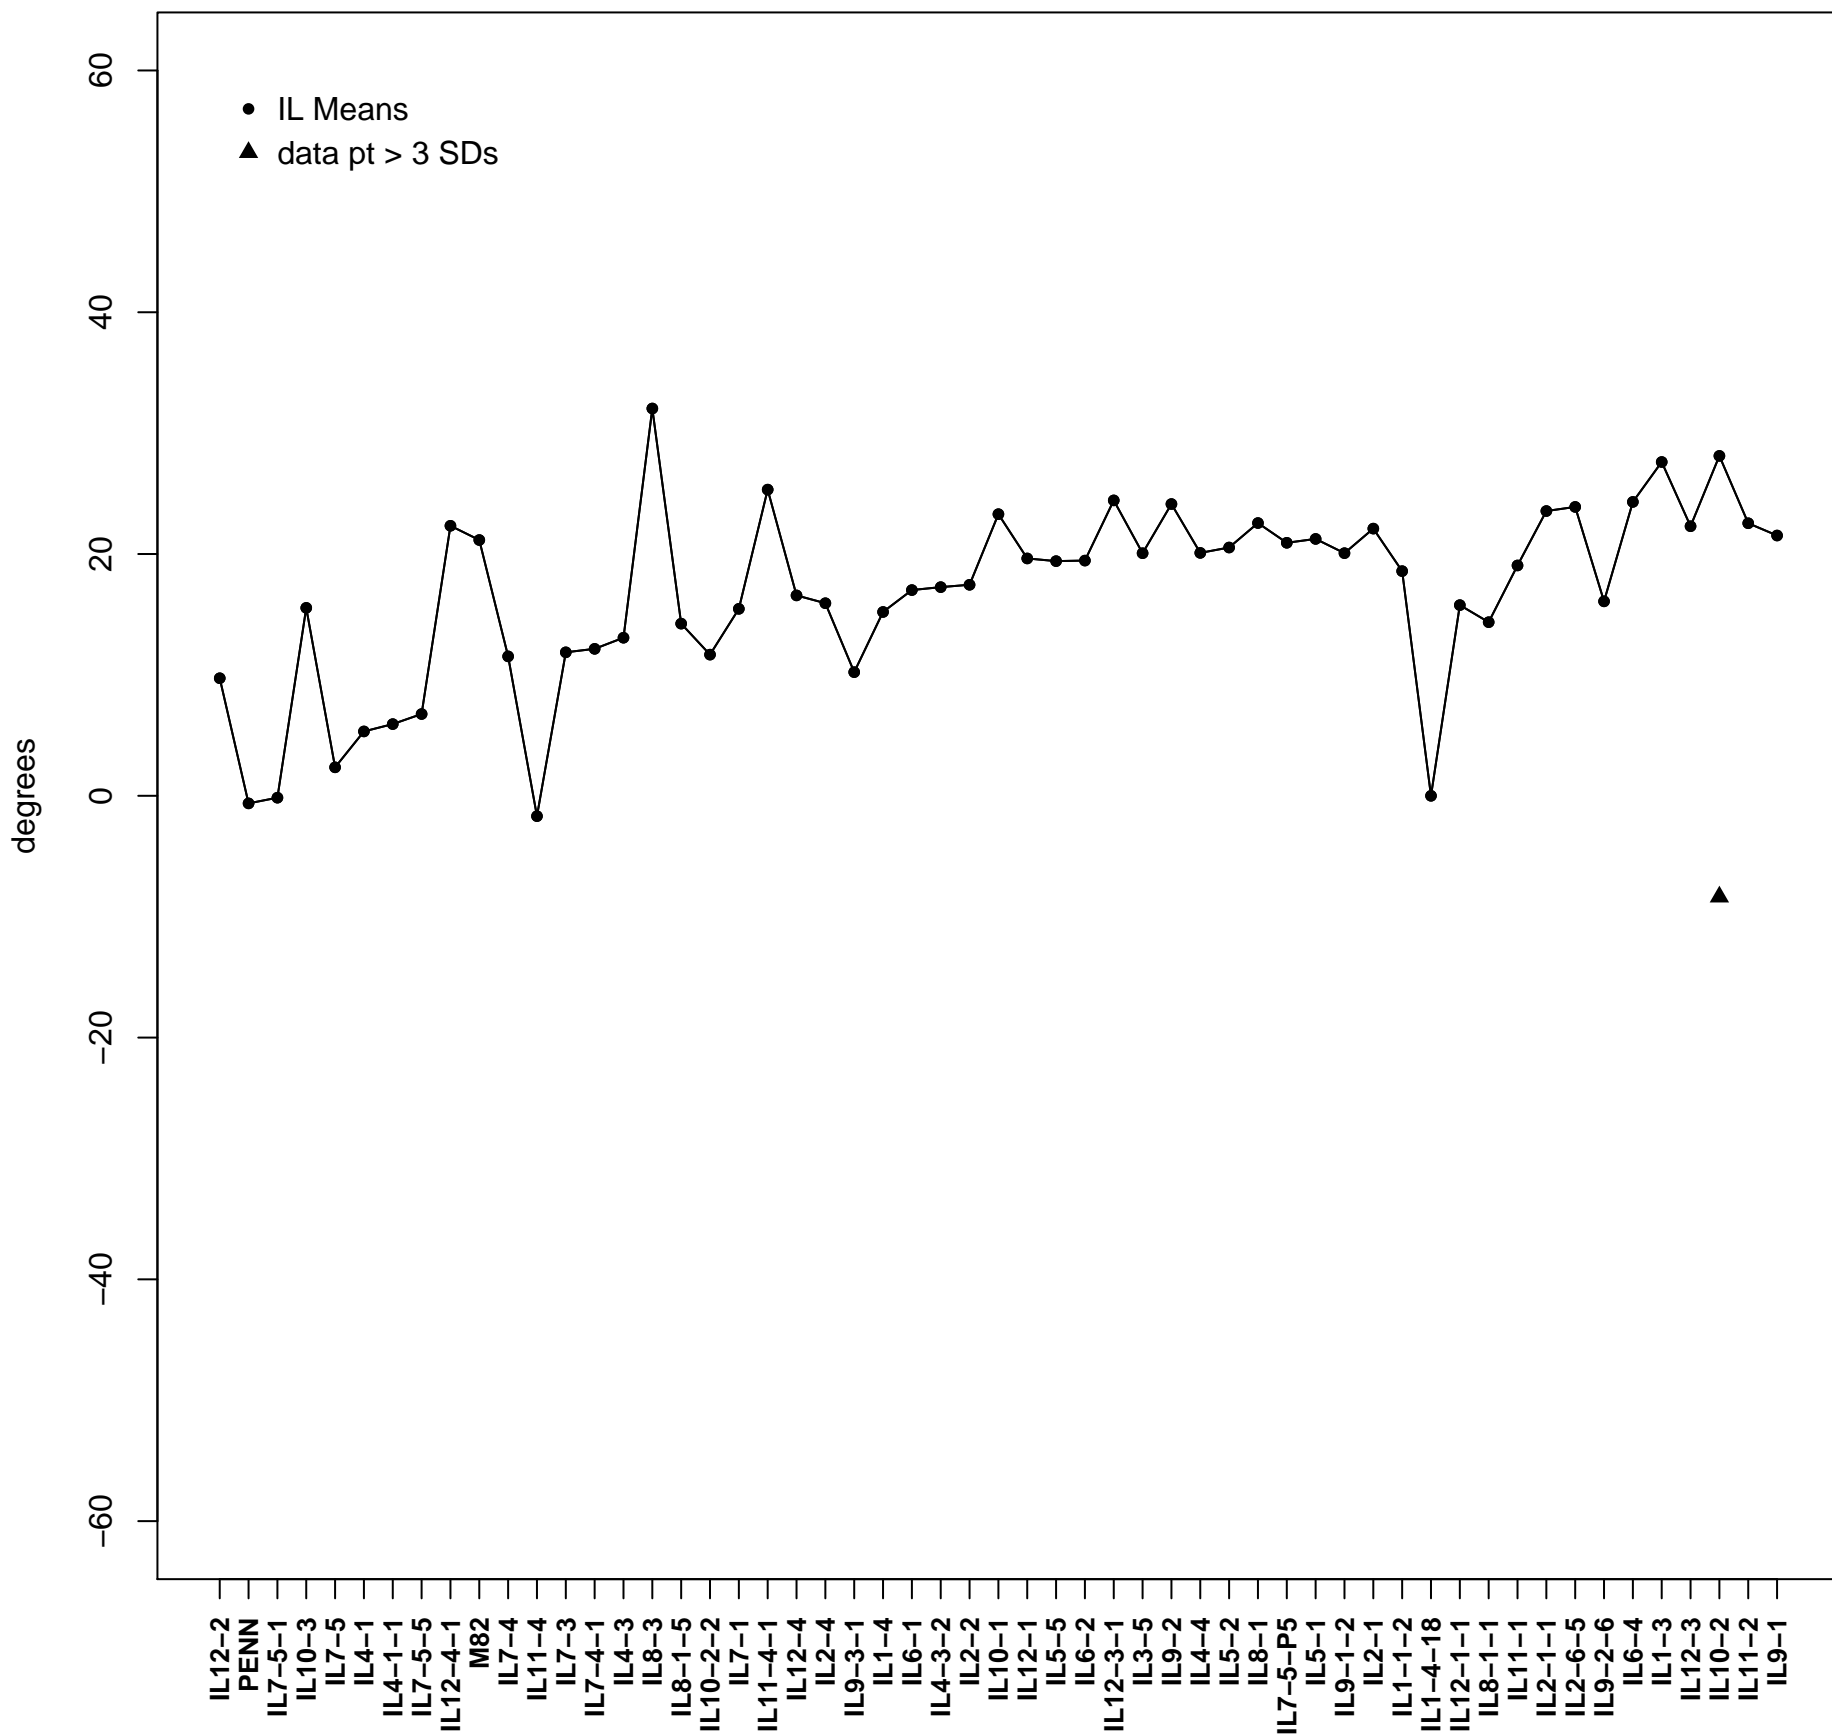

Data for trait T17

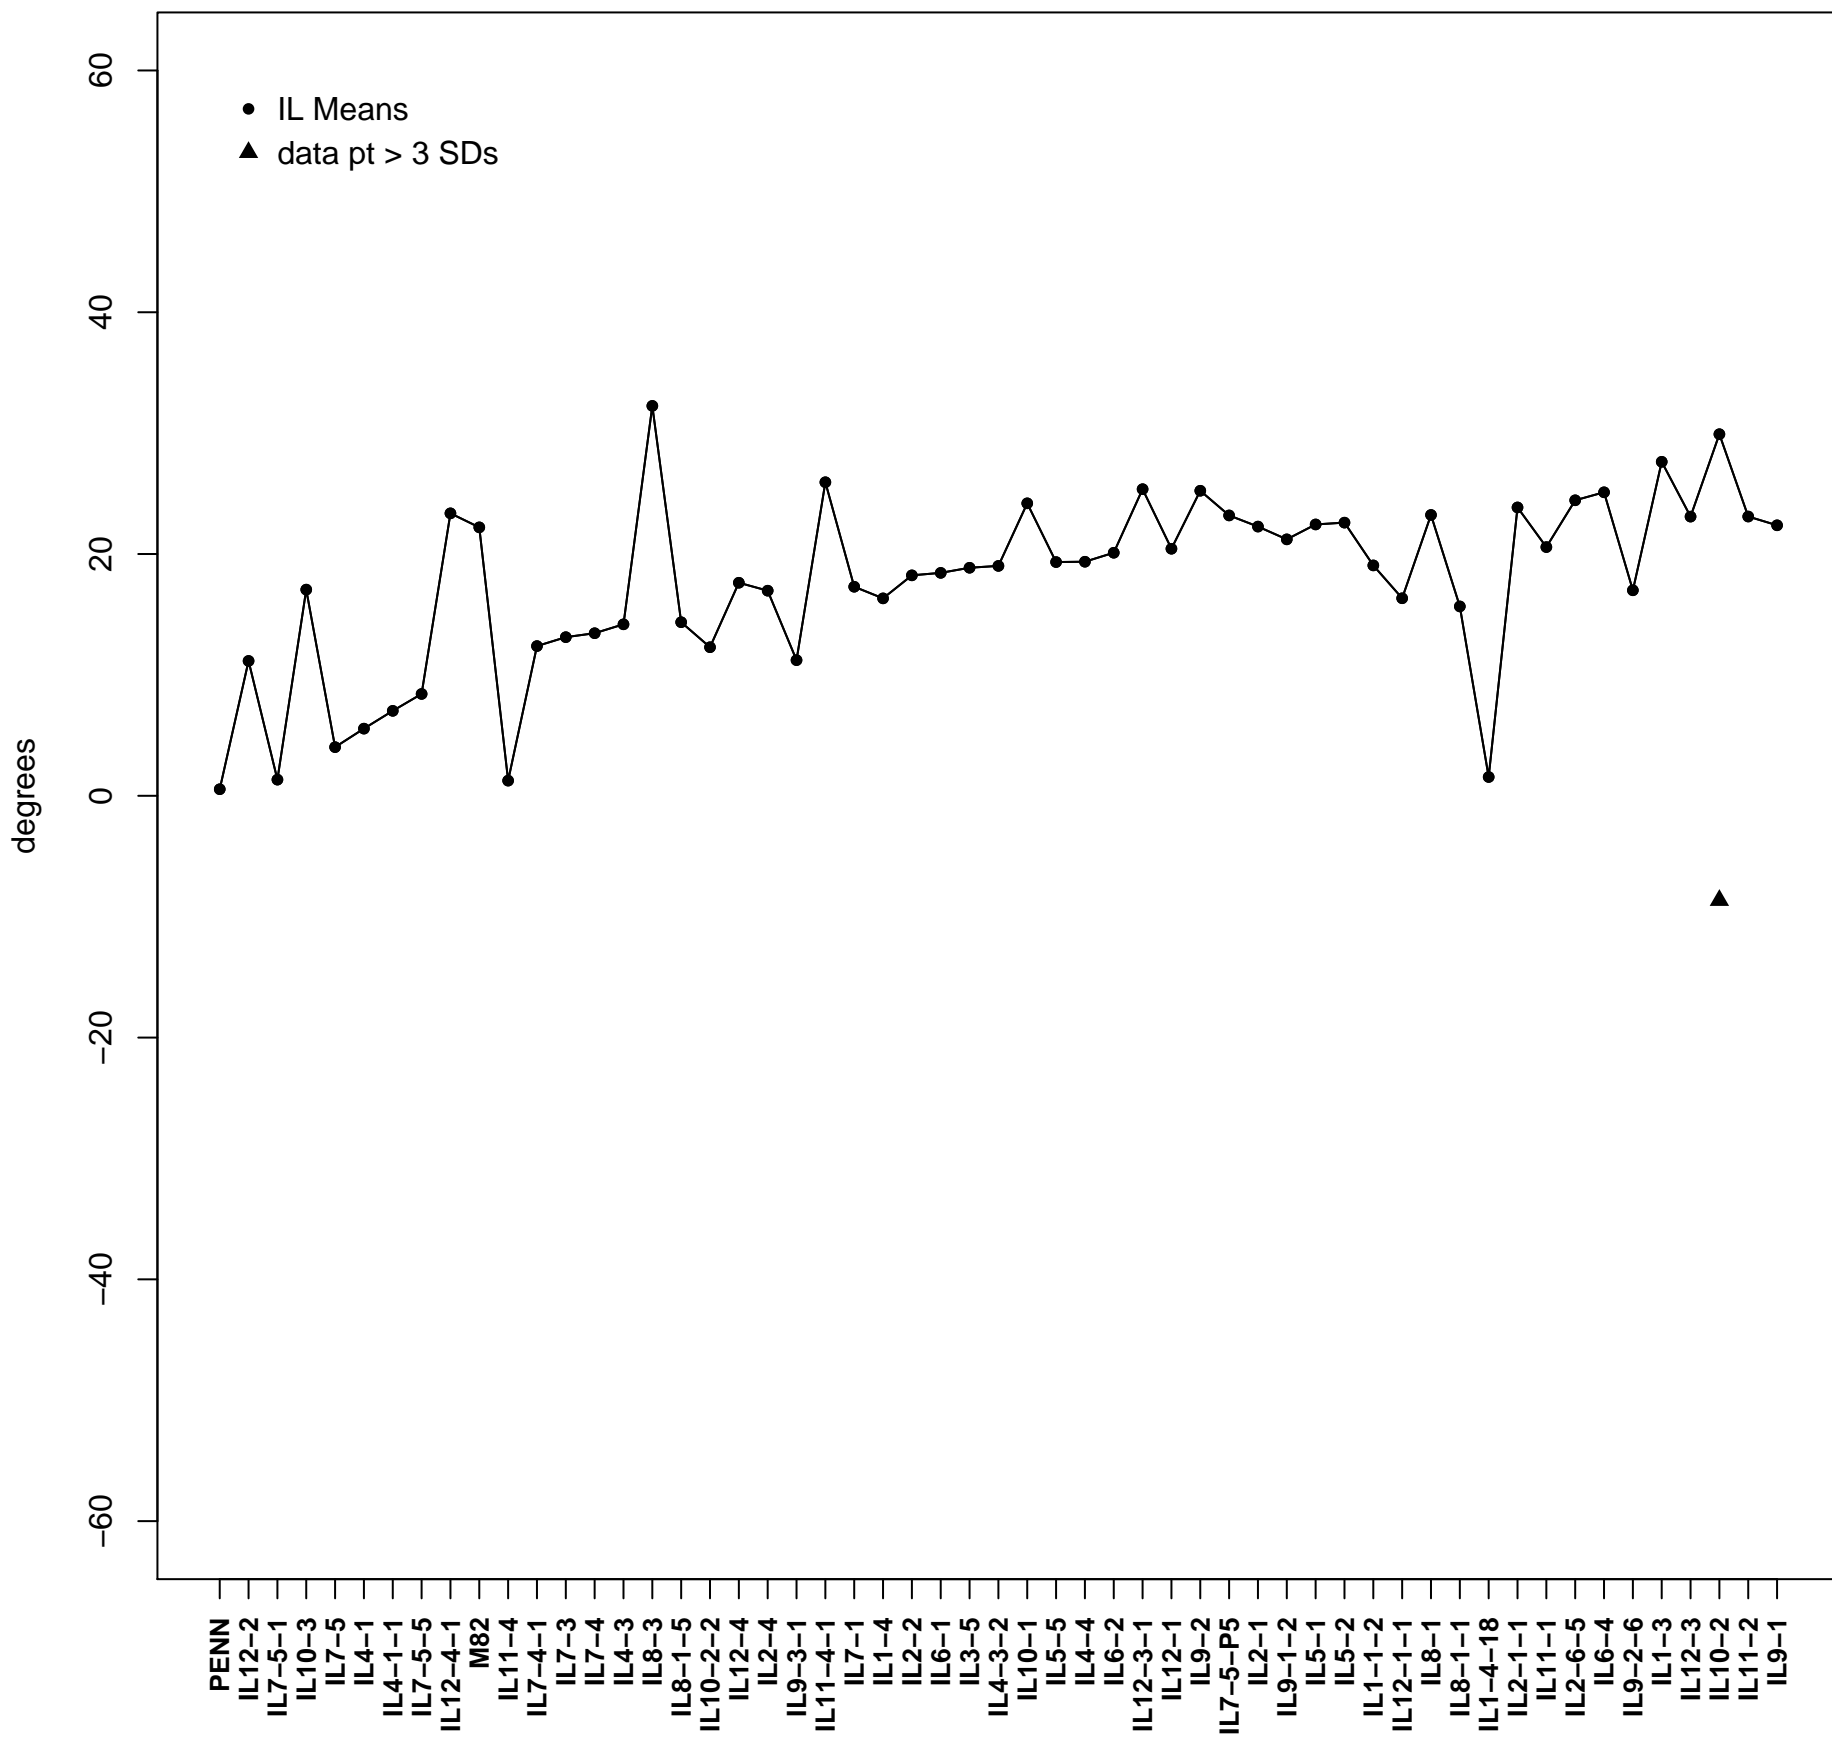

Data for trait T18

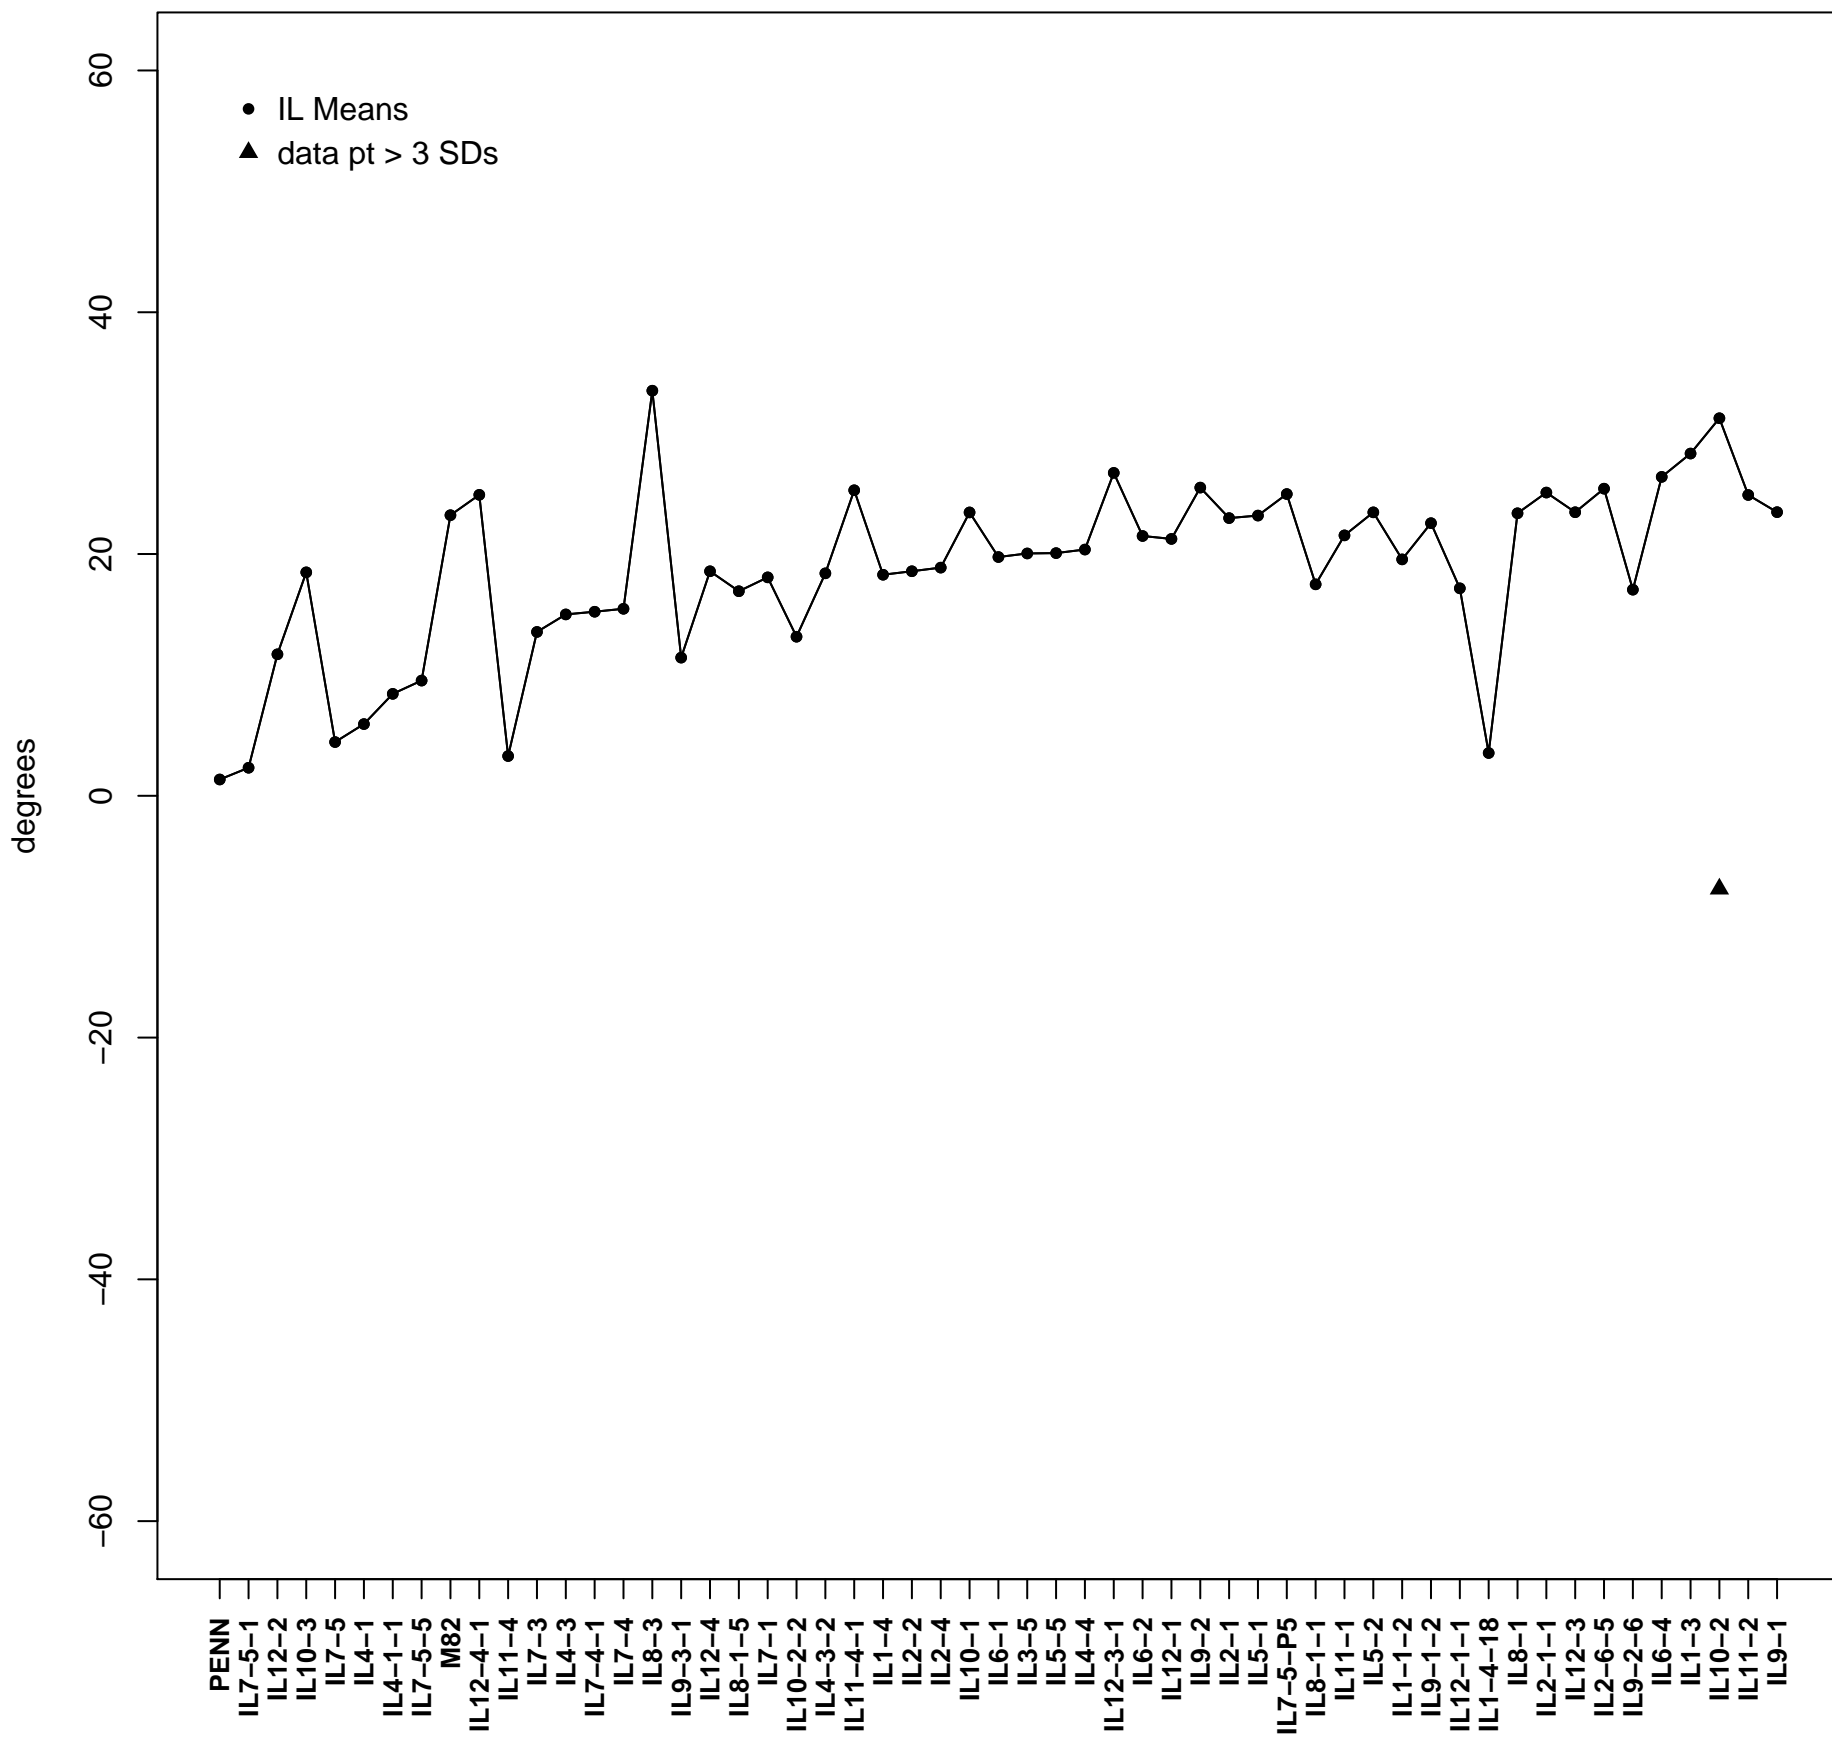

Data for trait T19

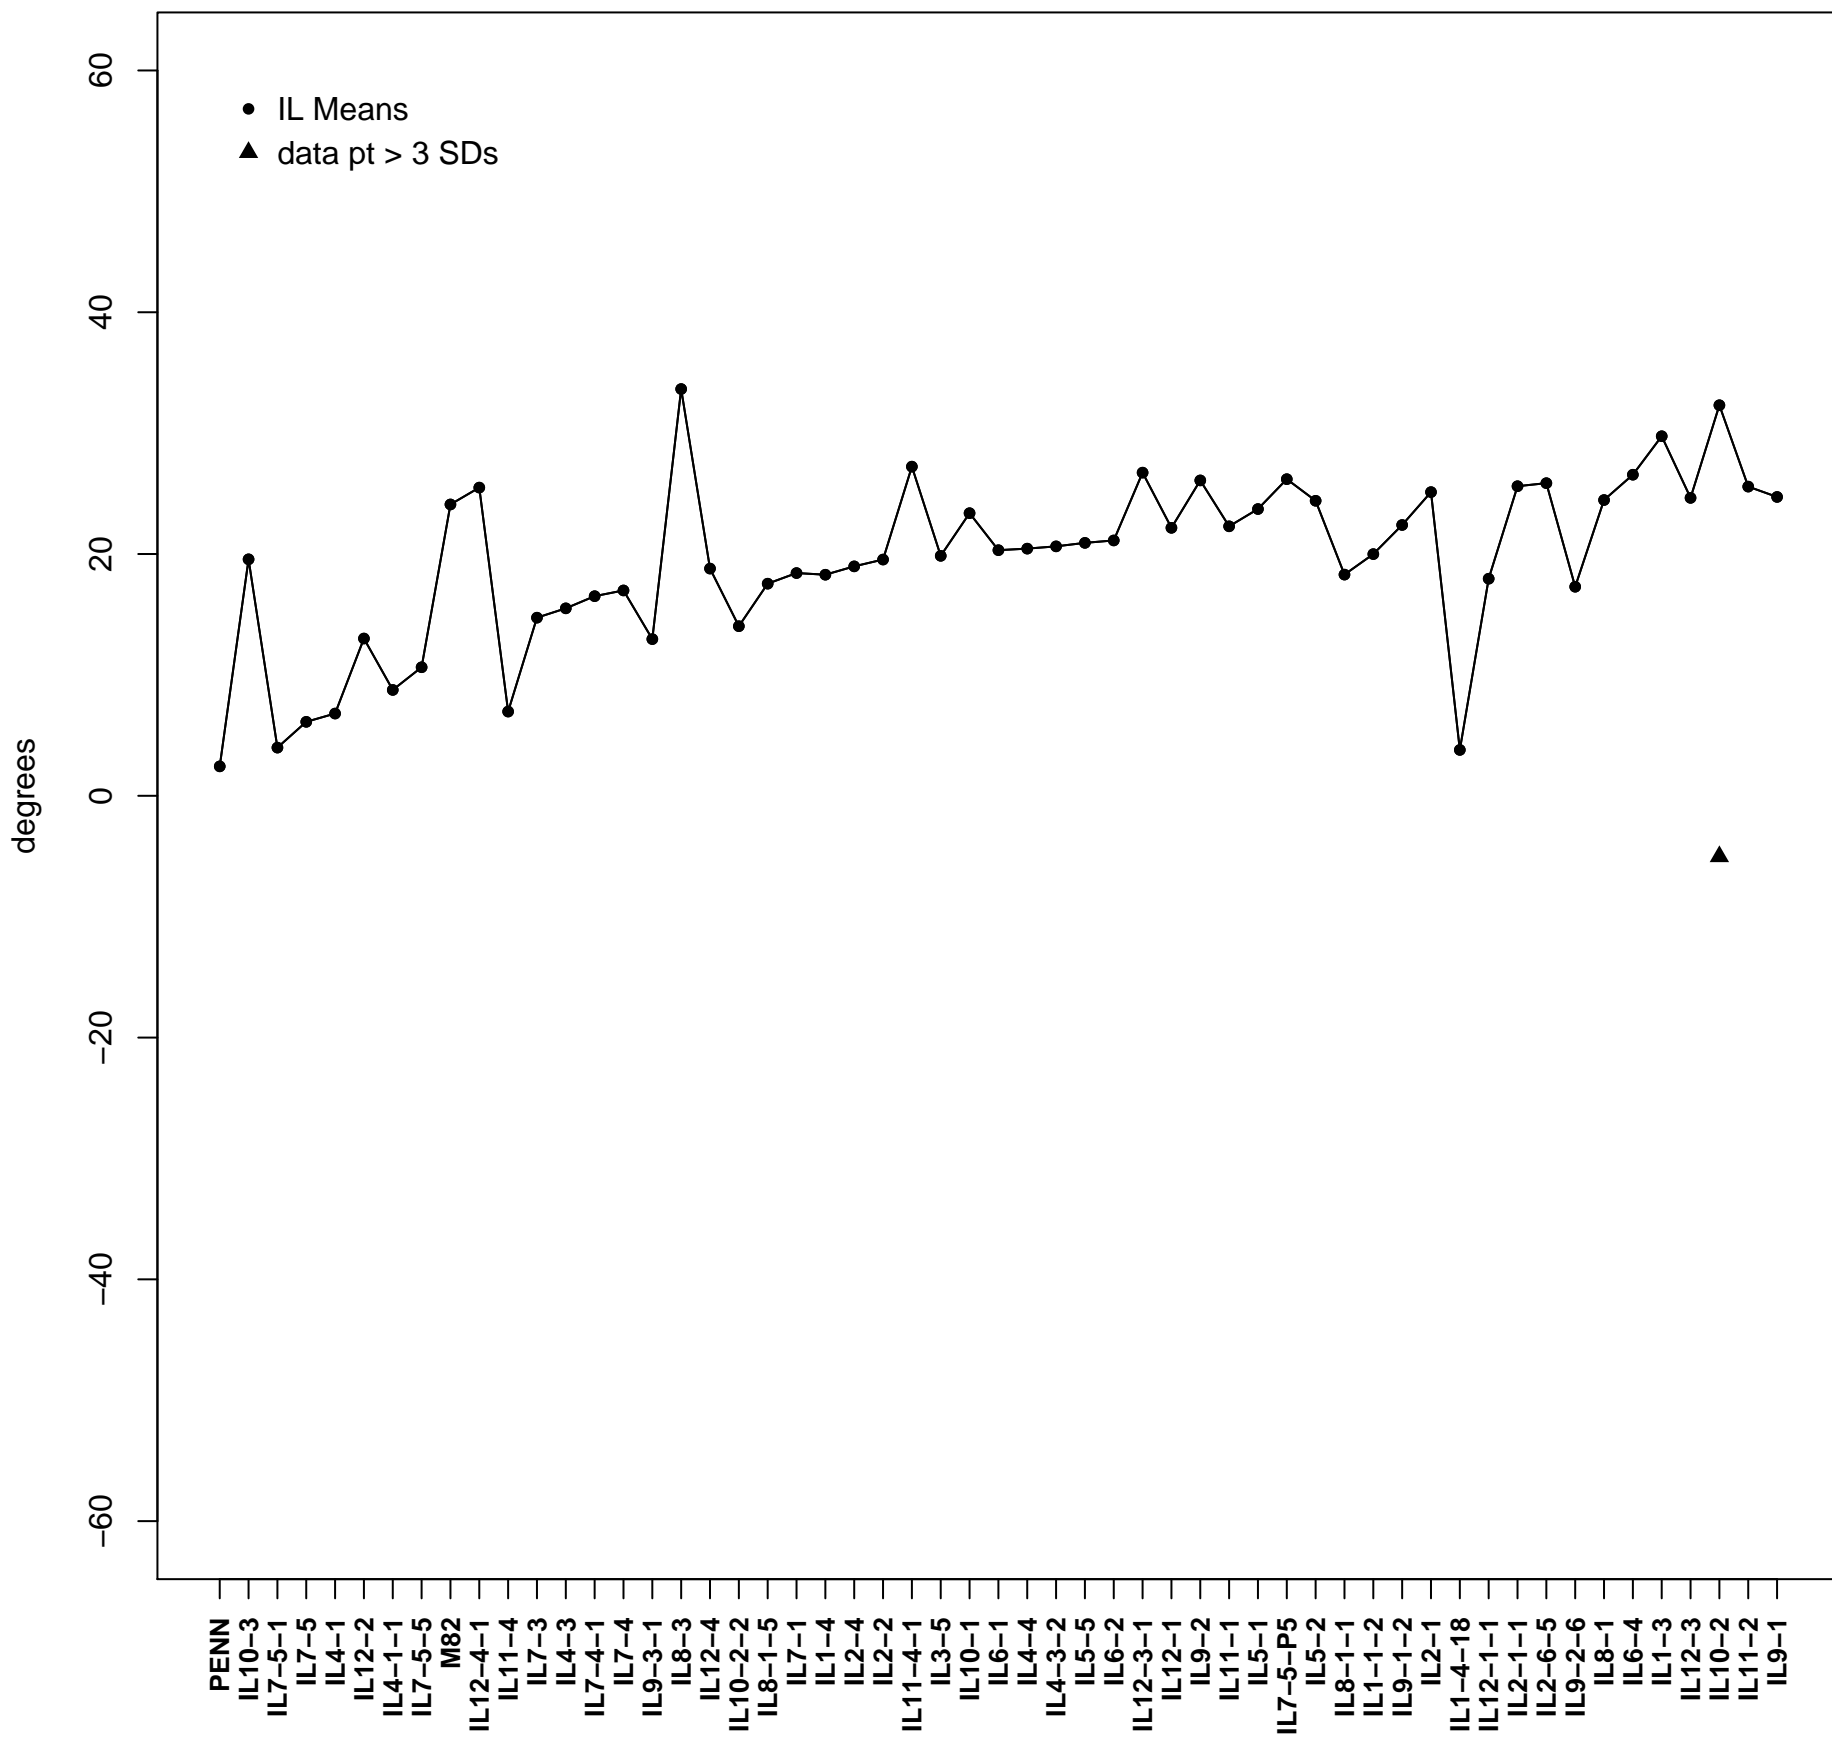

Data for trait T20

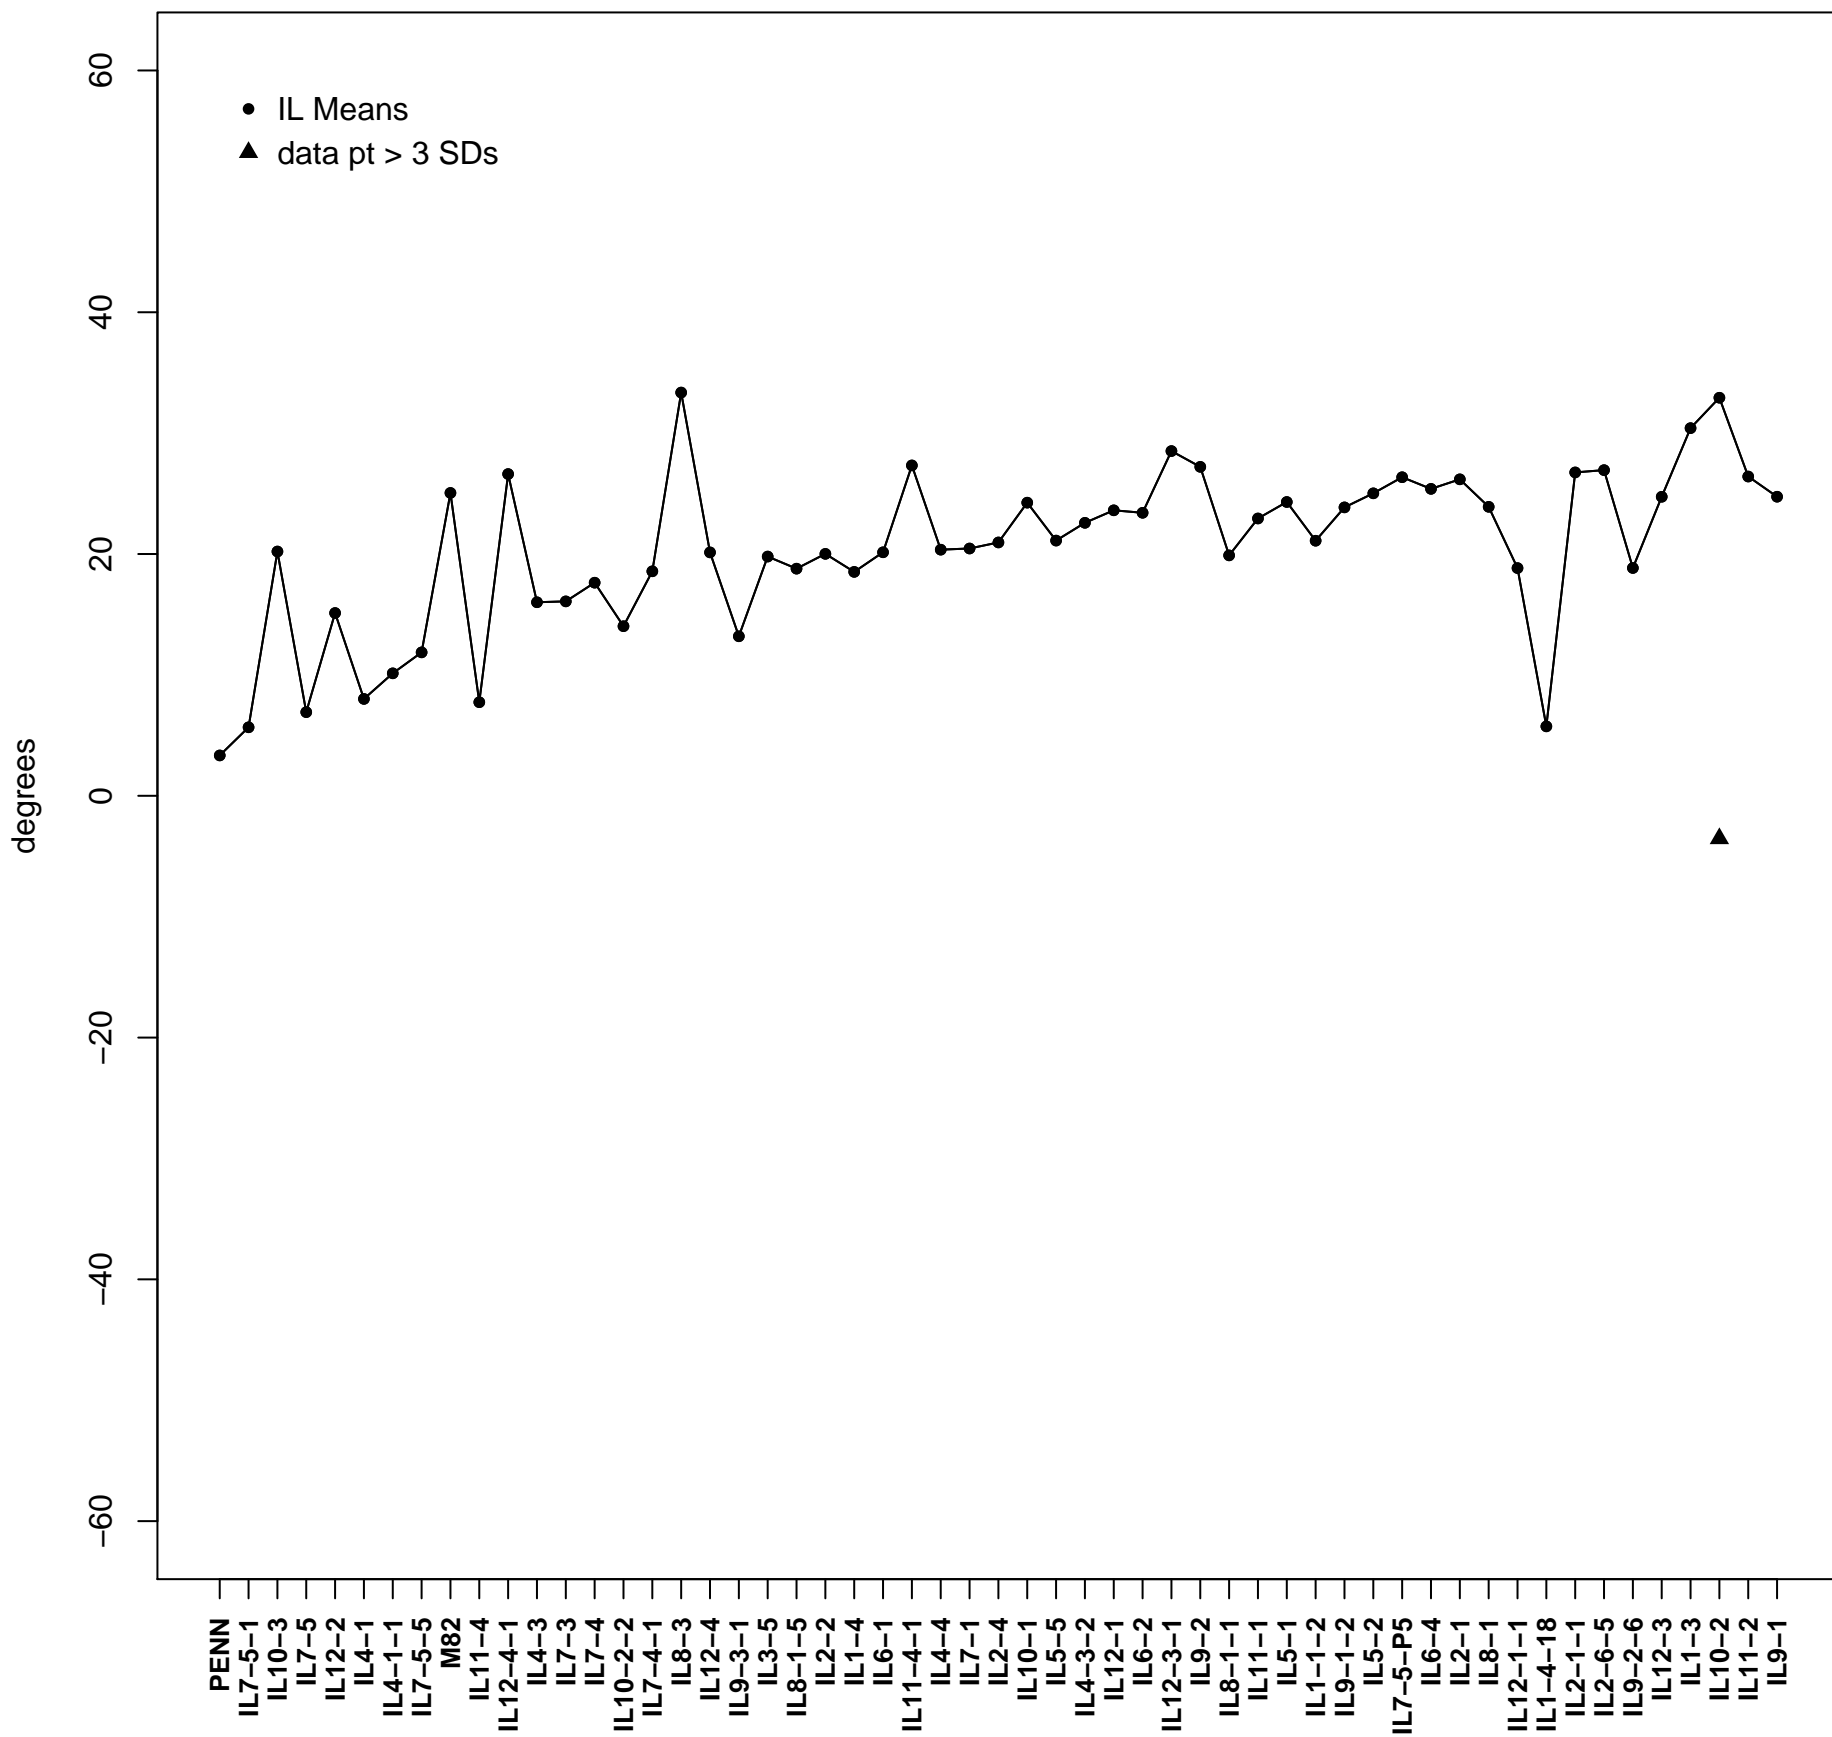

Data for trait T21

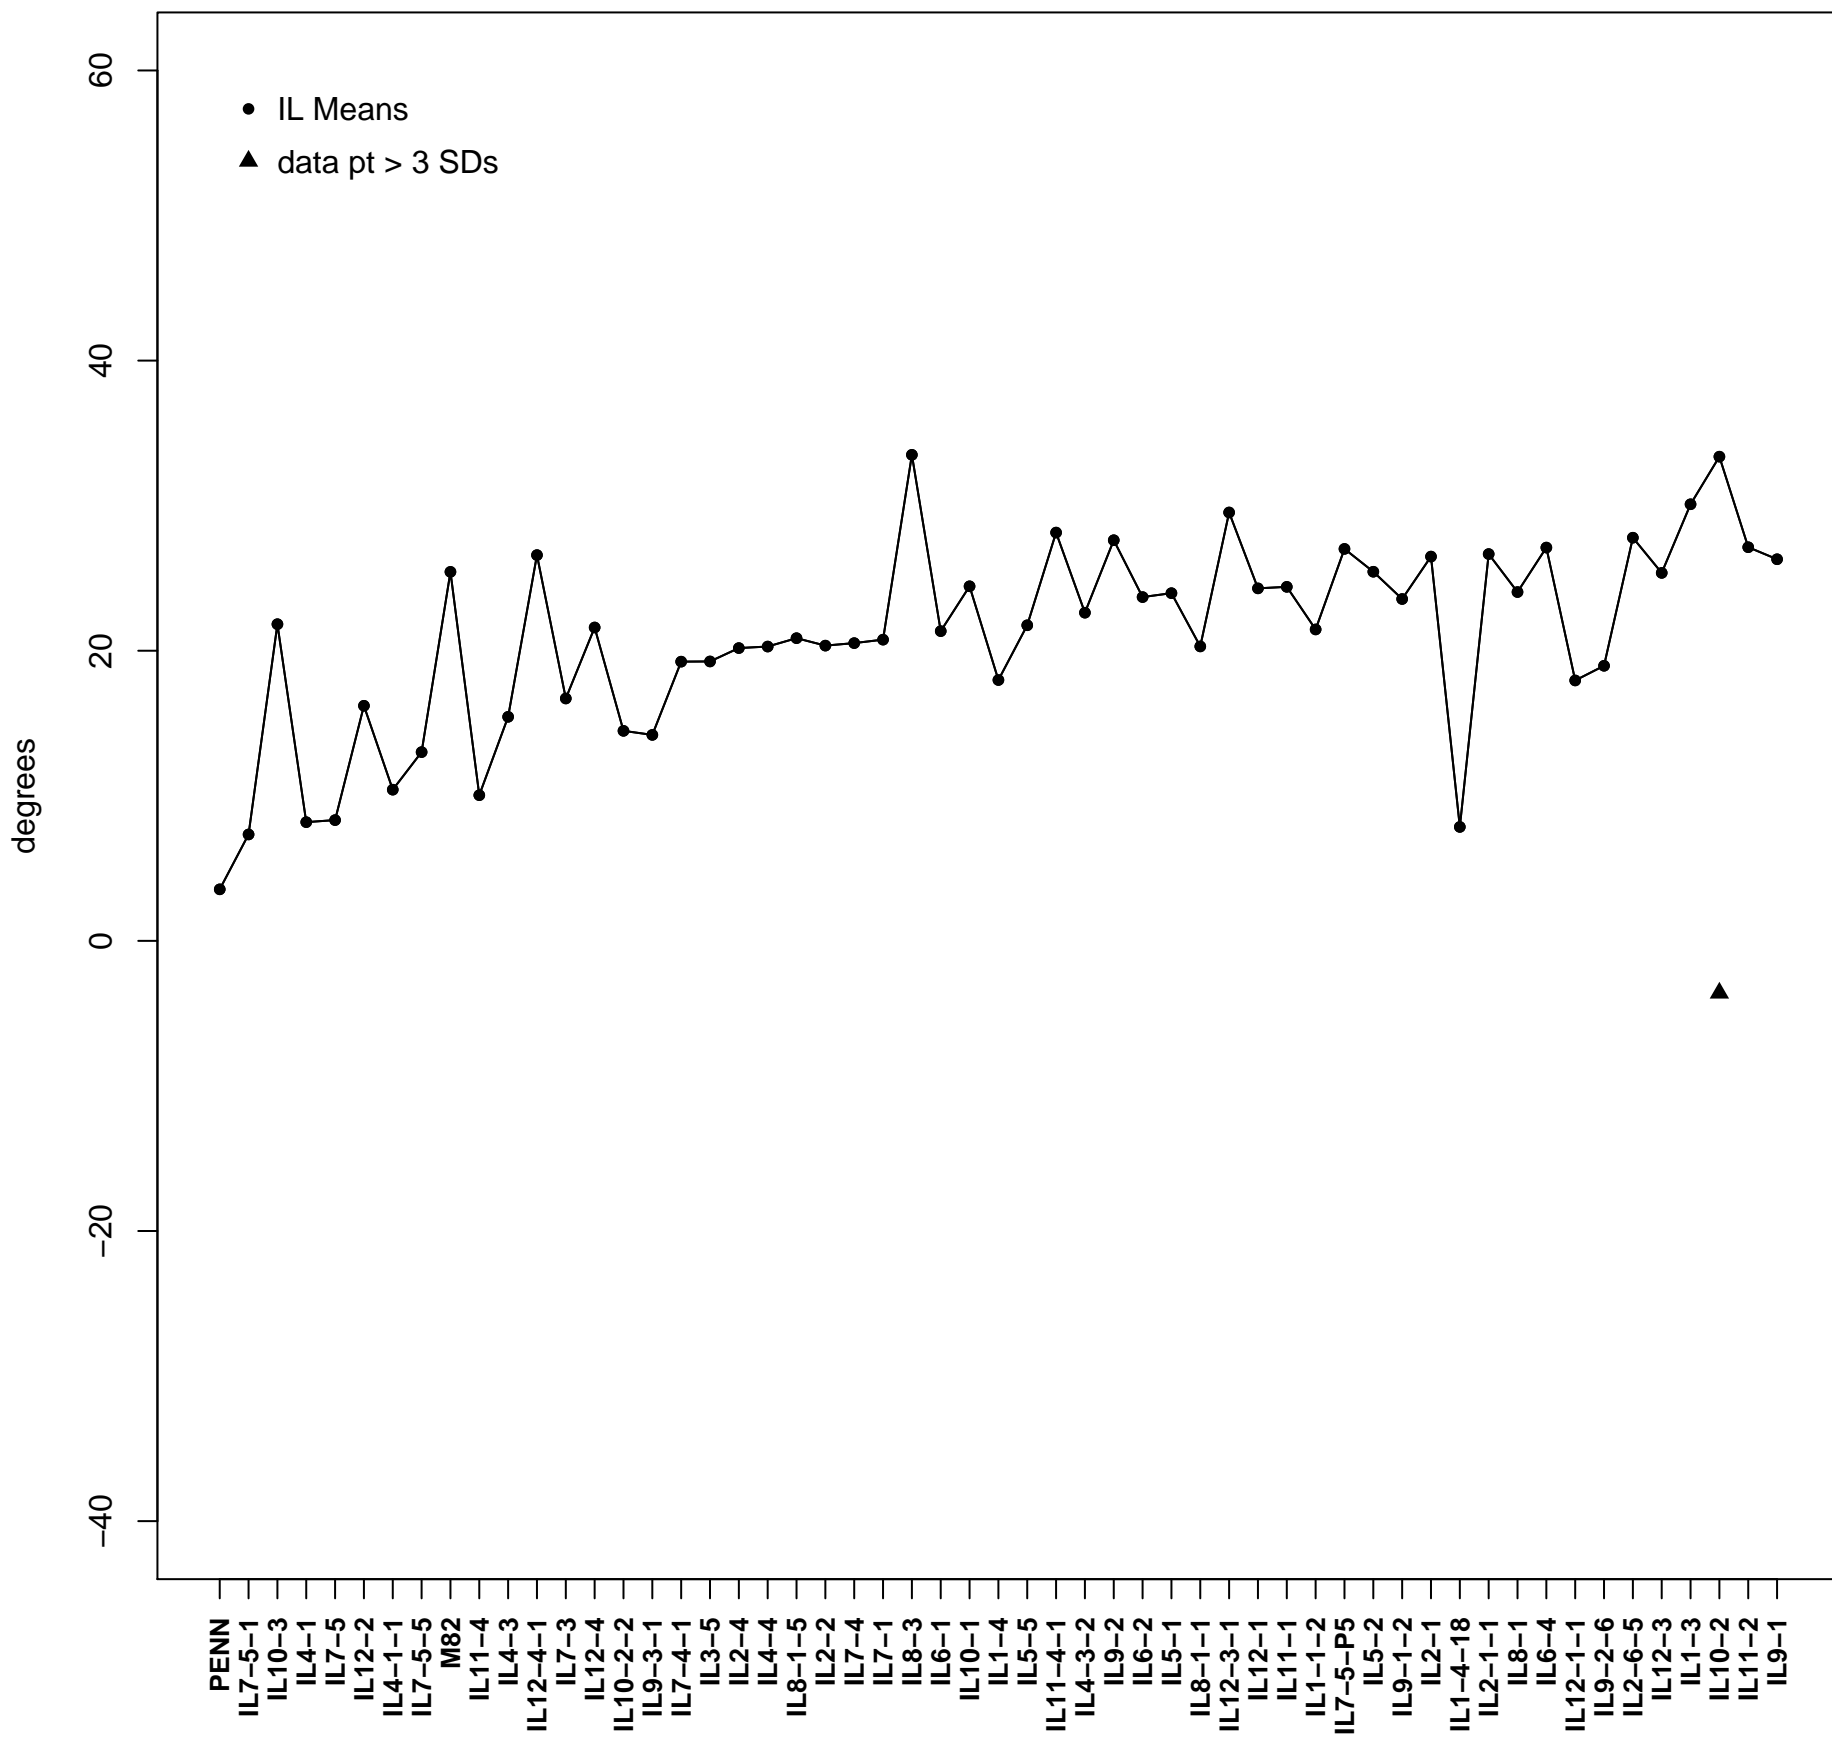

Data for trait T22

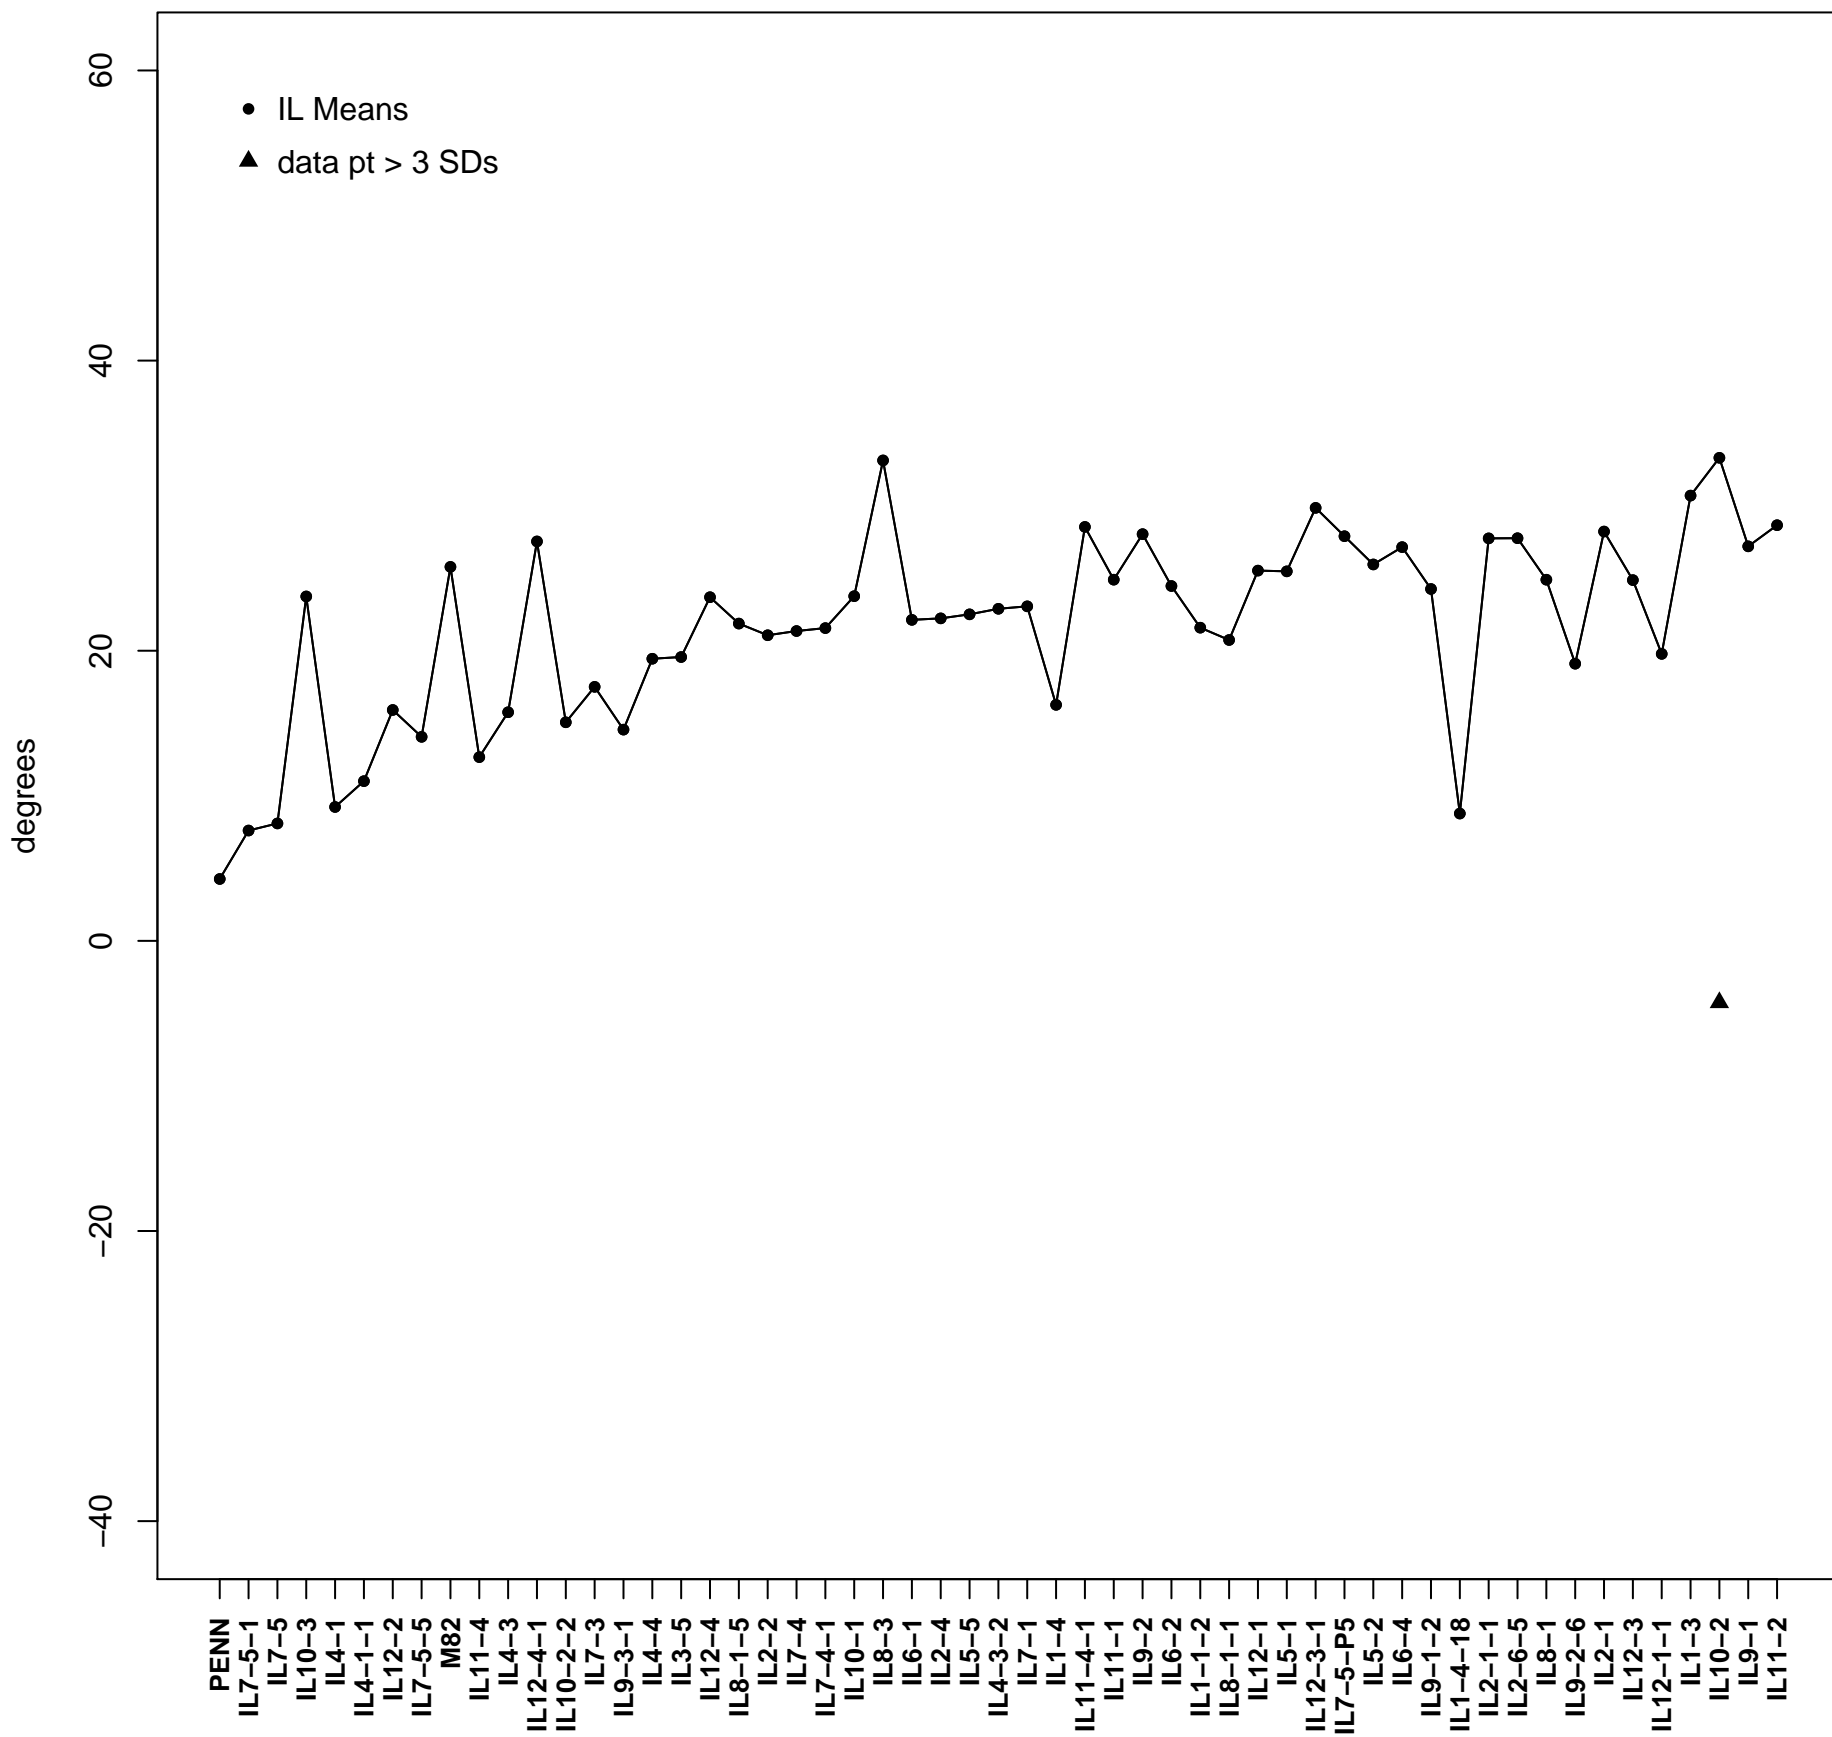

Data for trait T23

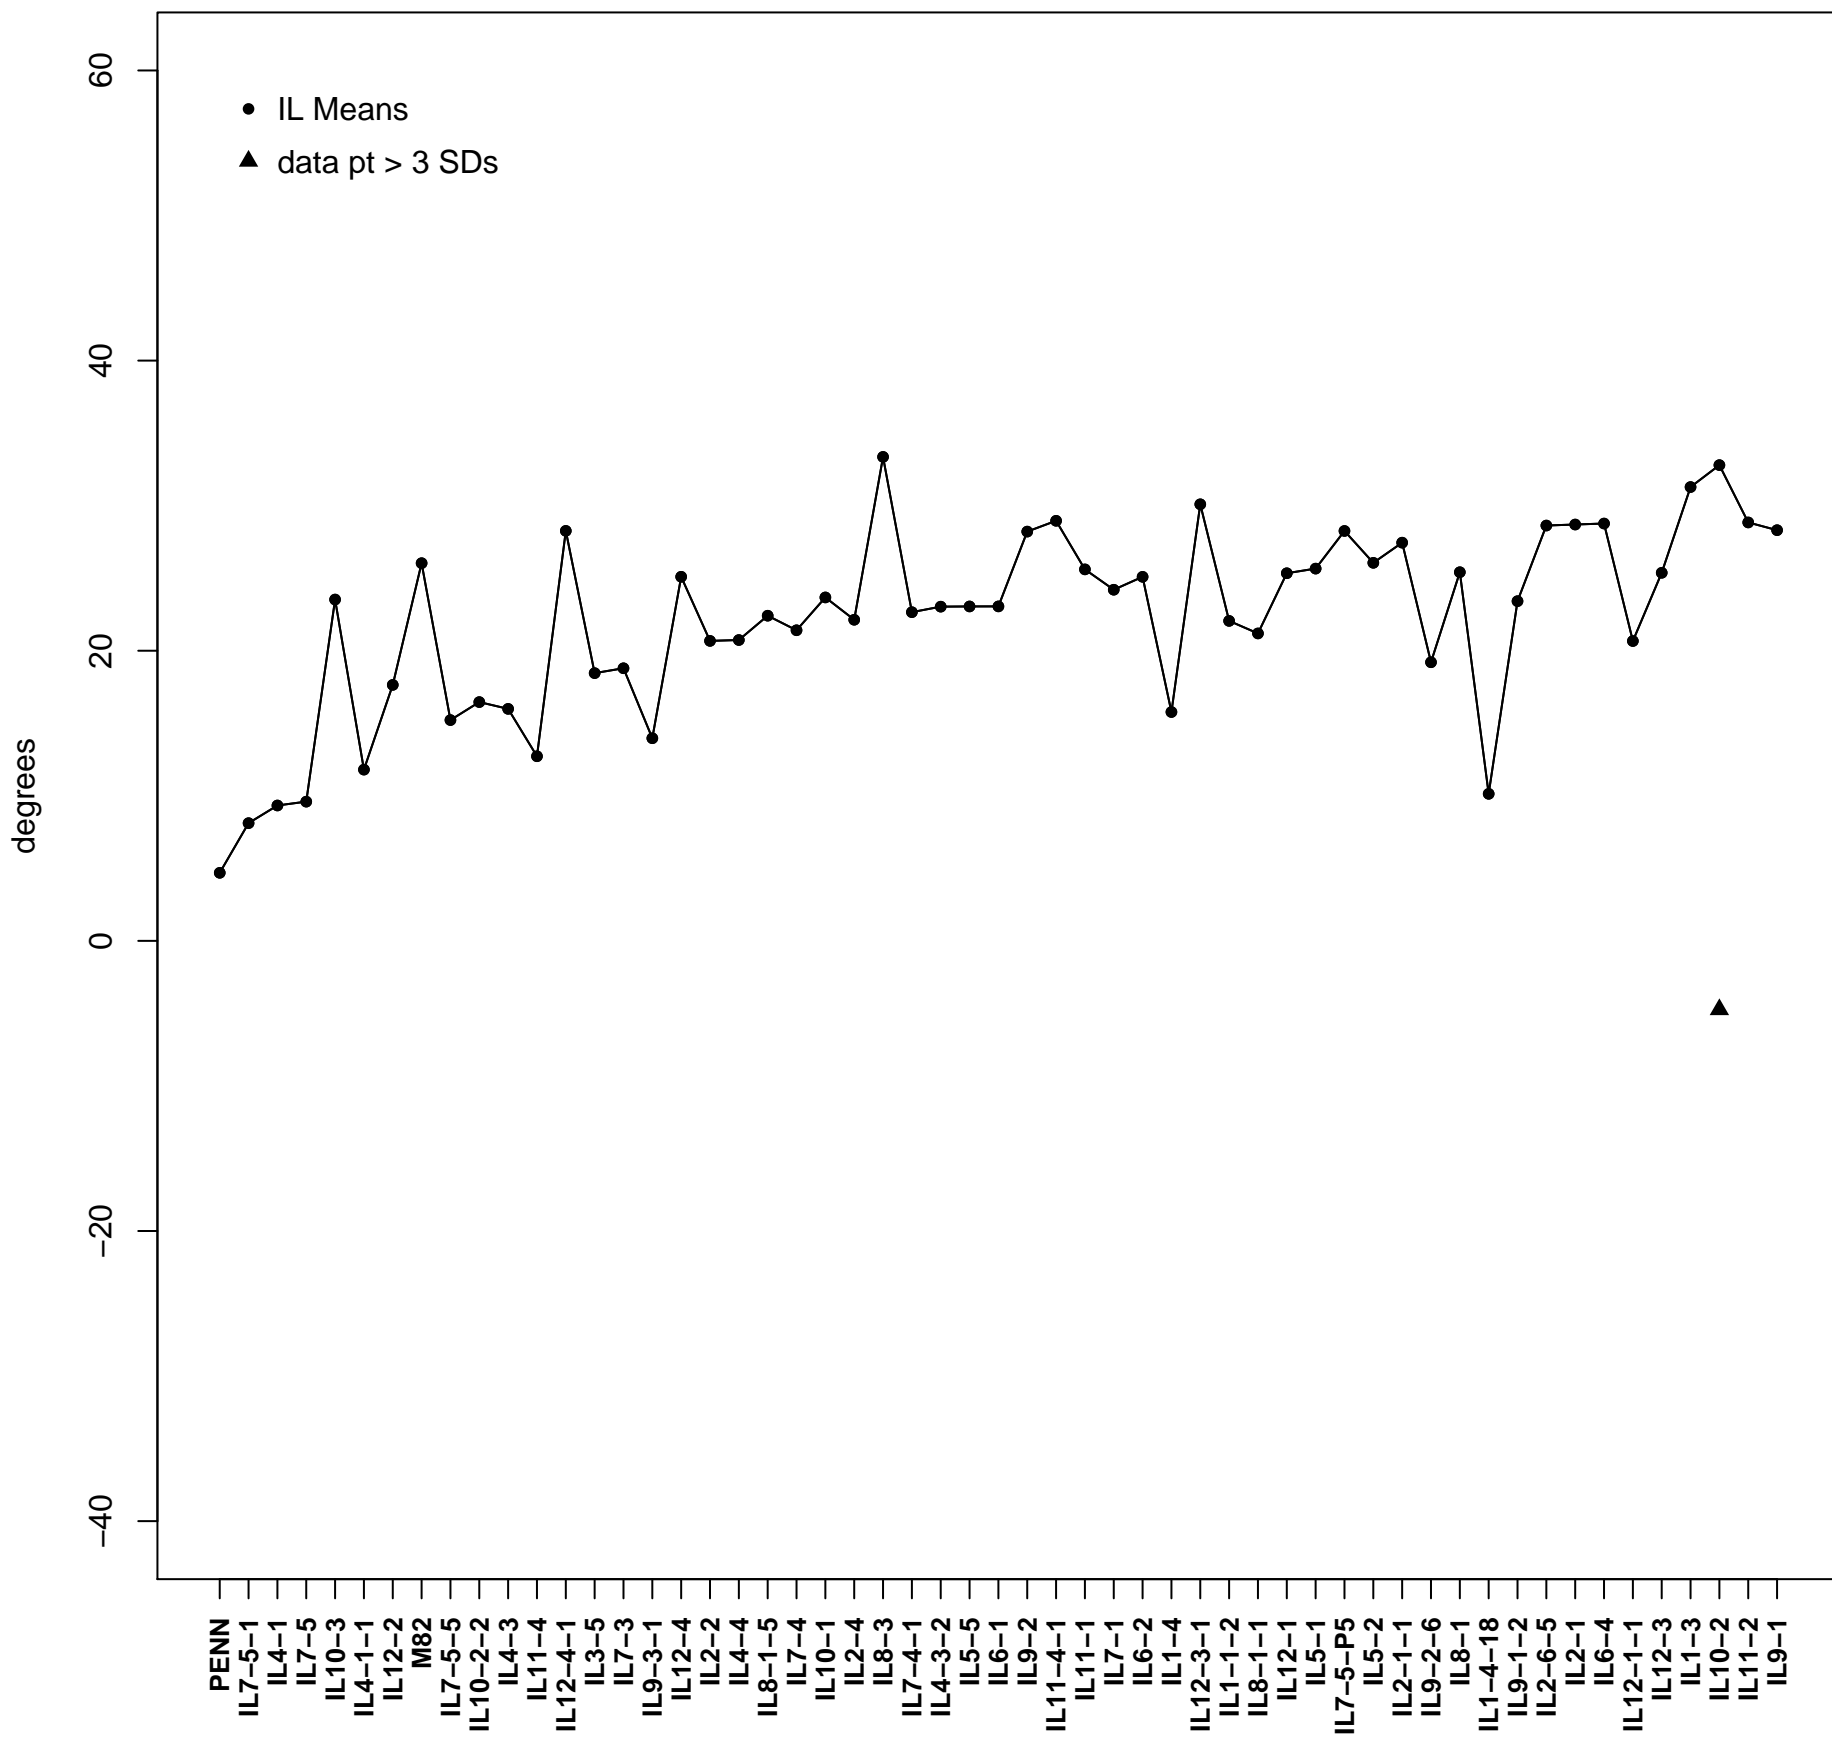



Data for trait T24

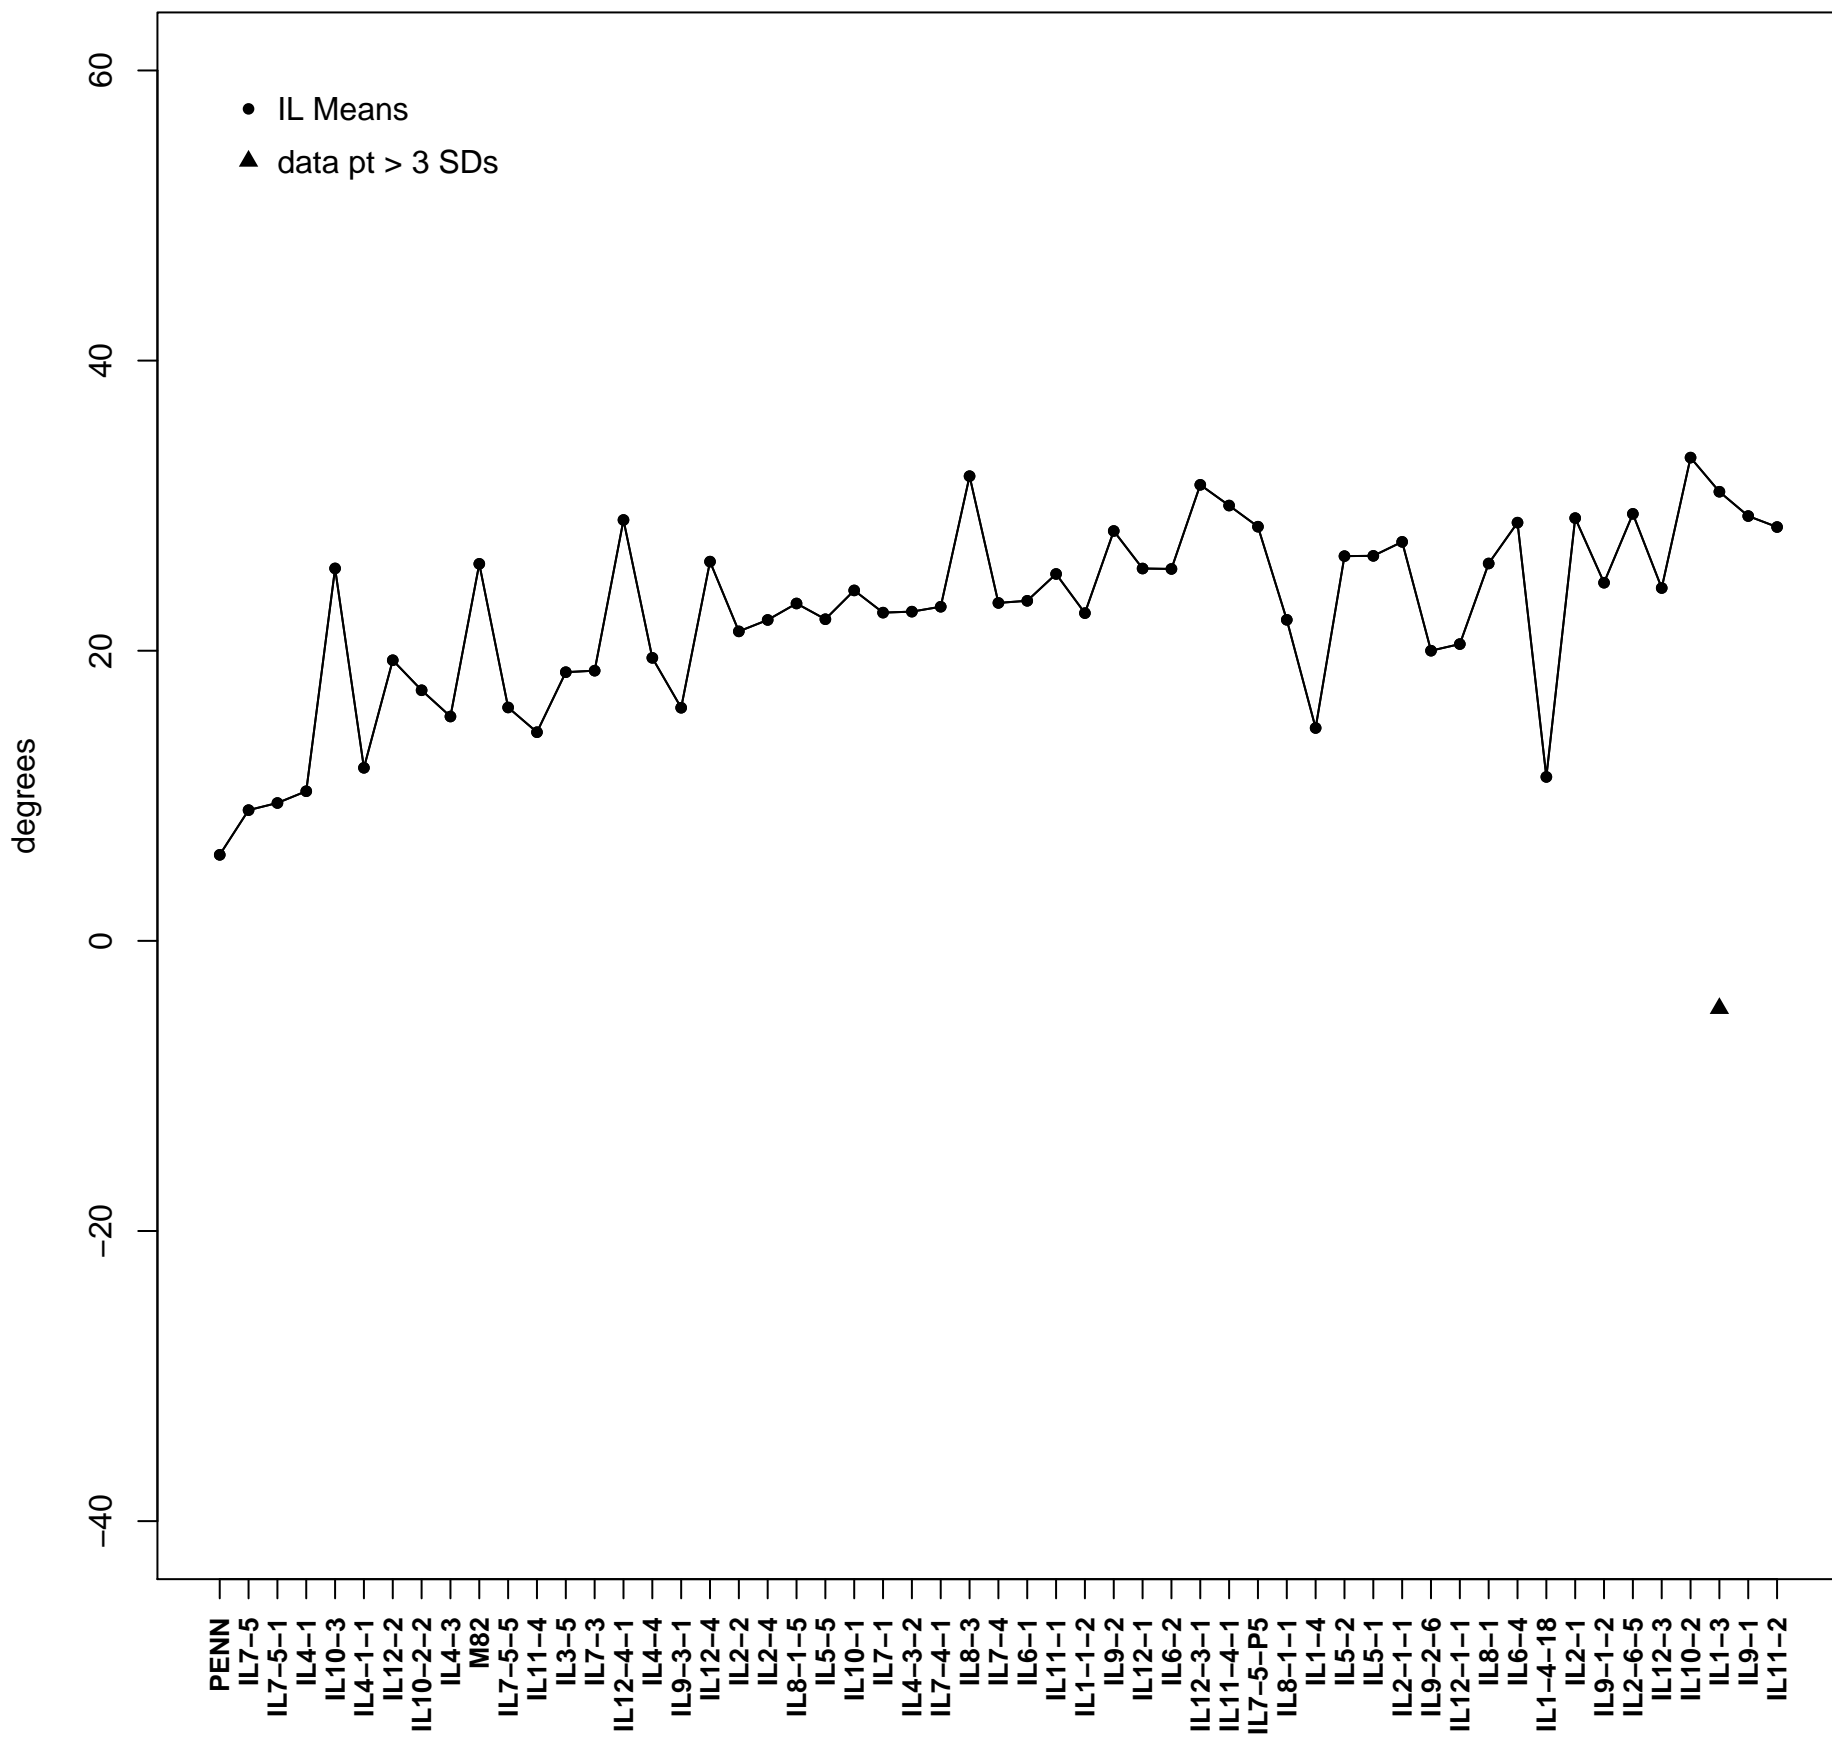

Data for trait T25

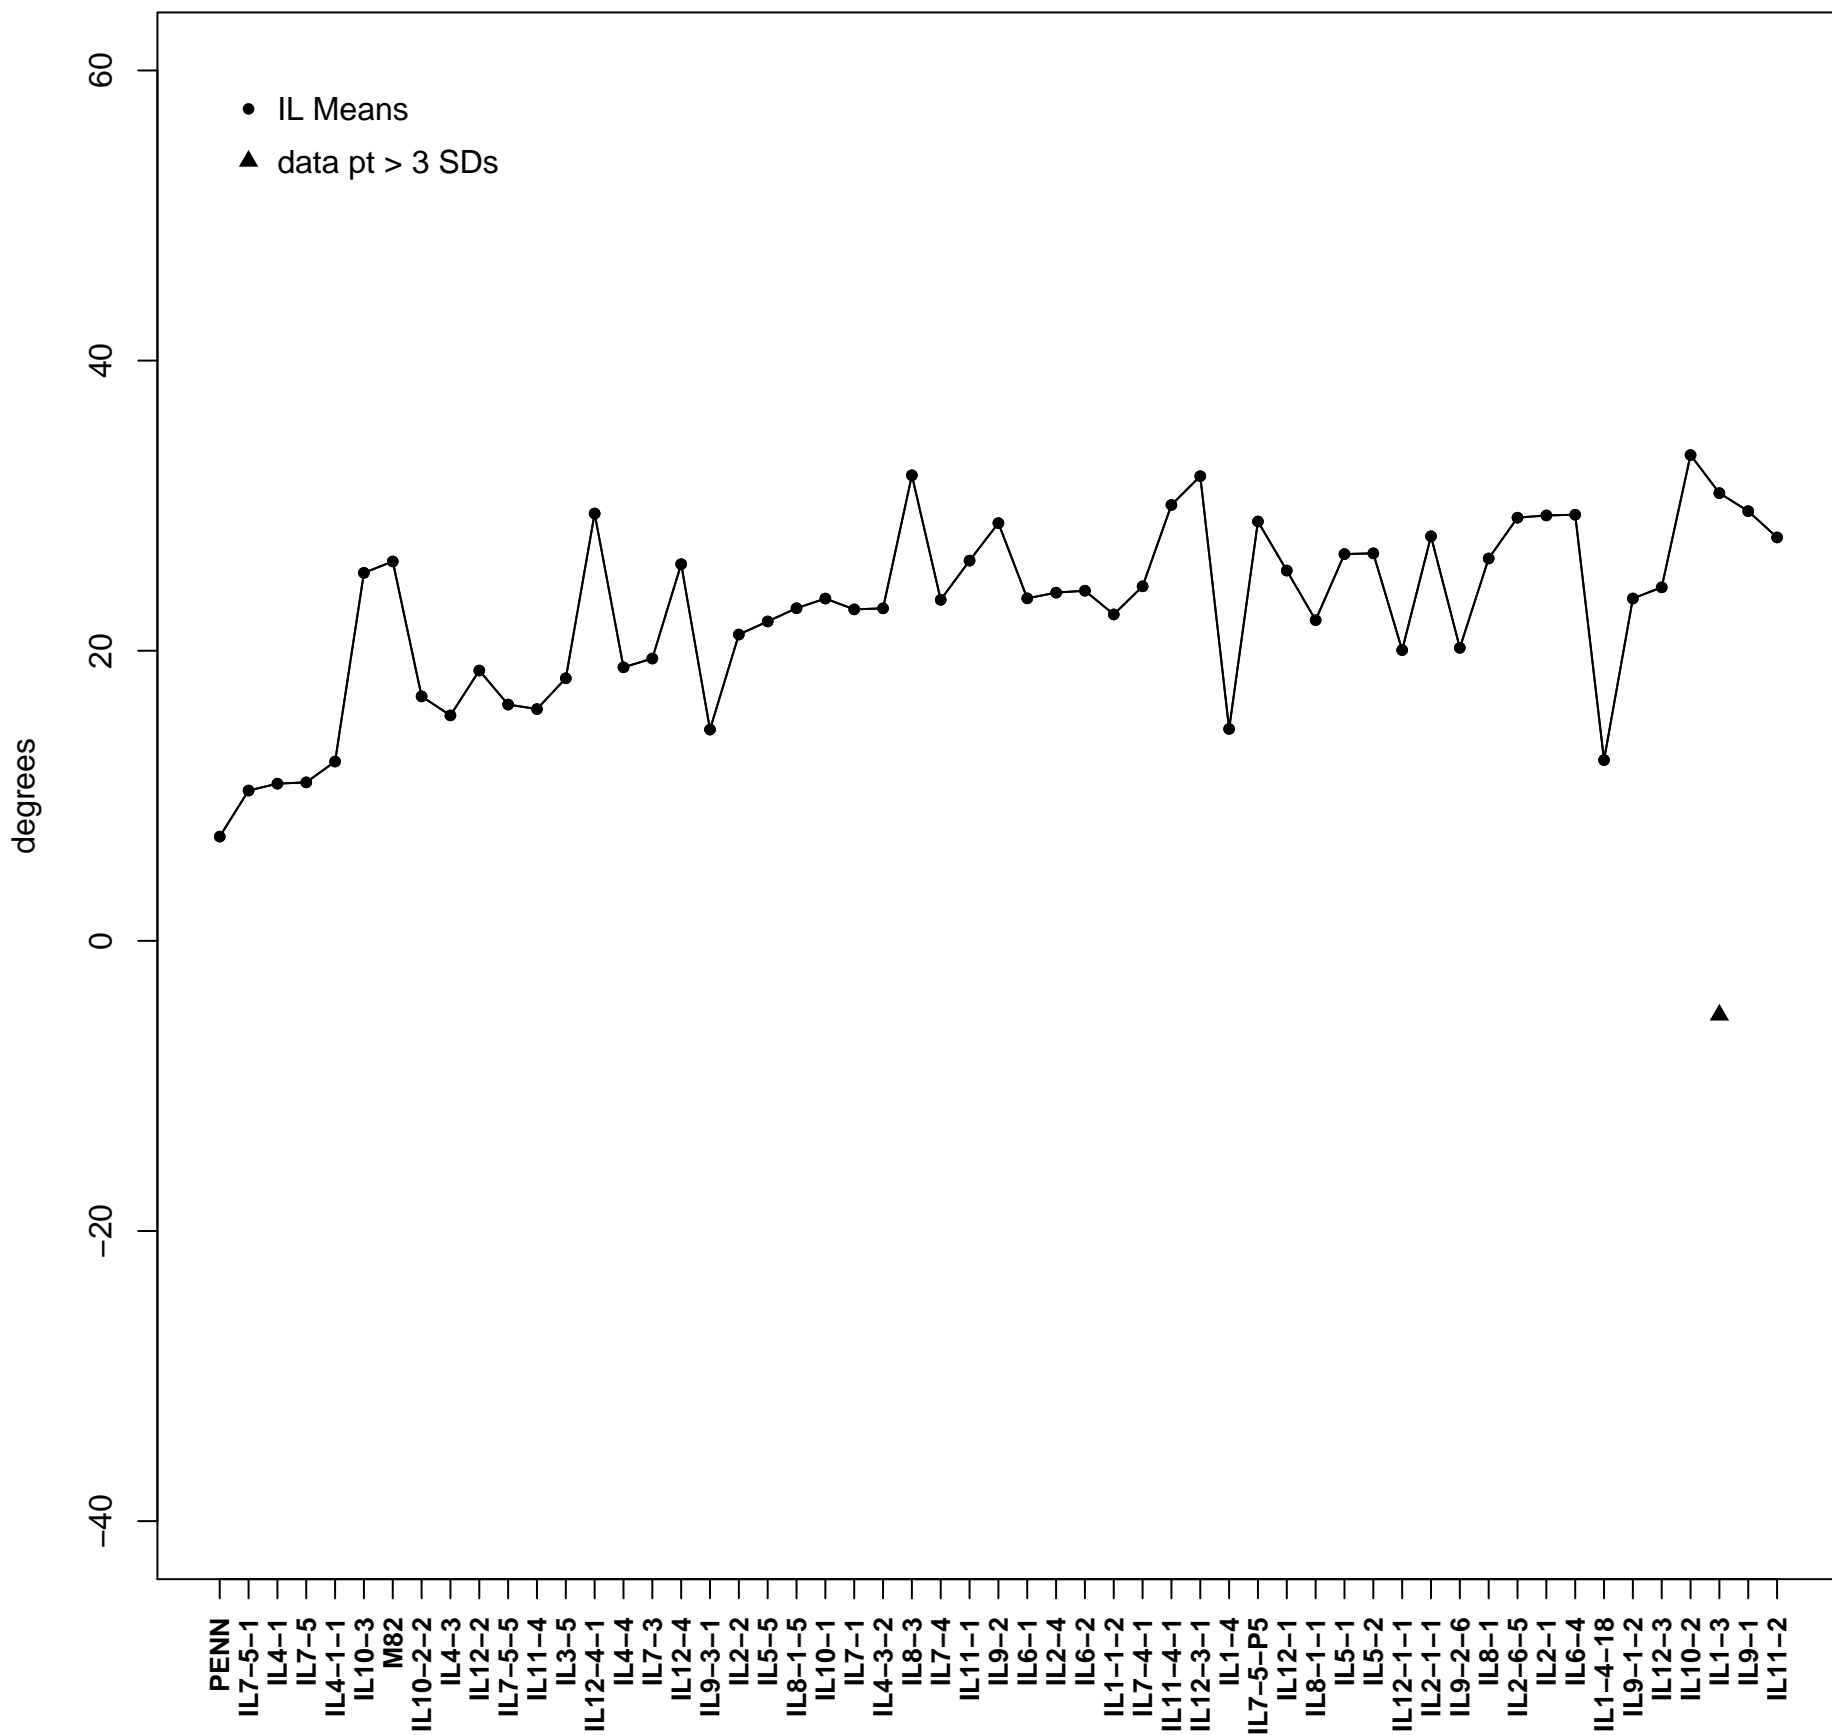

Data for trait T26

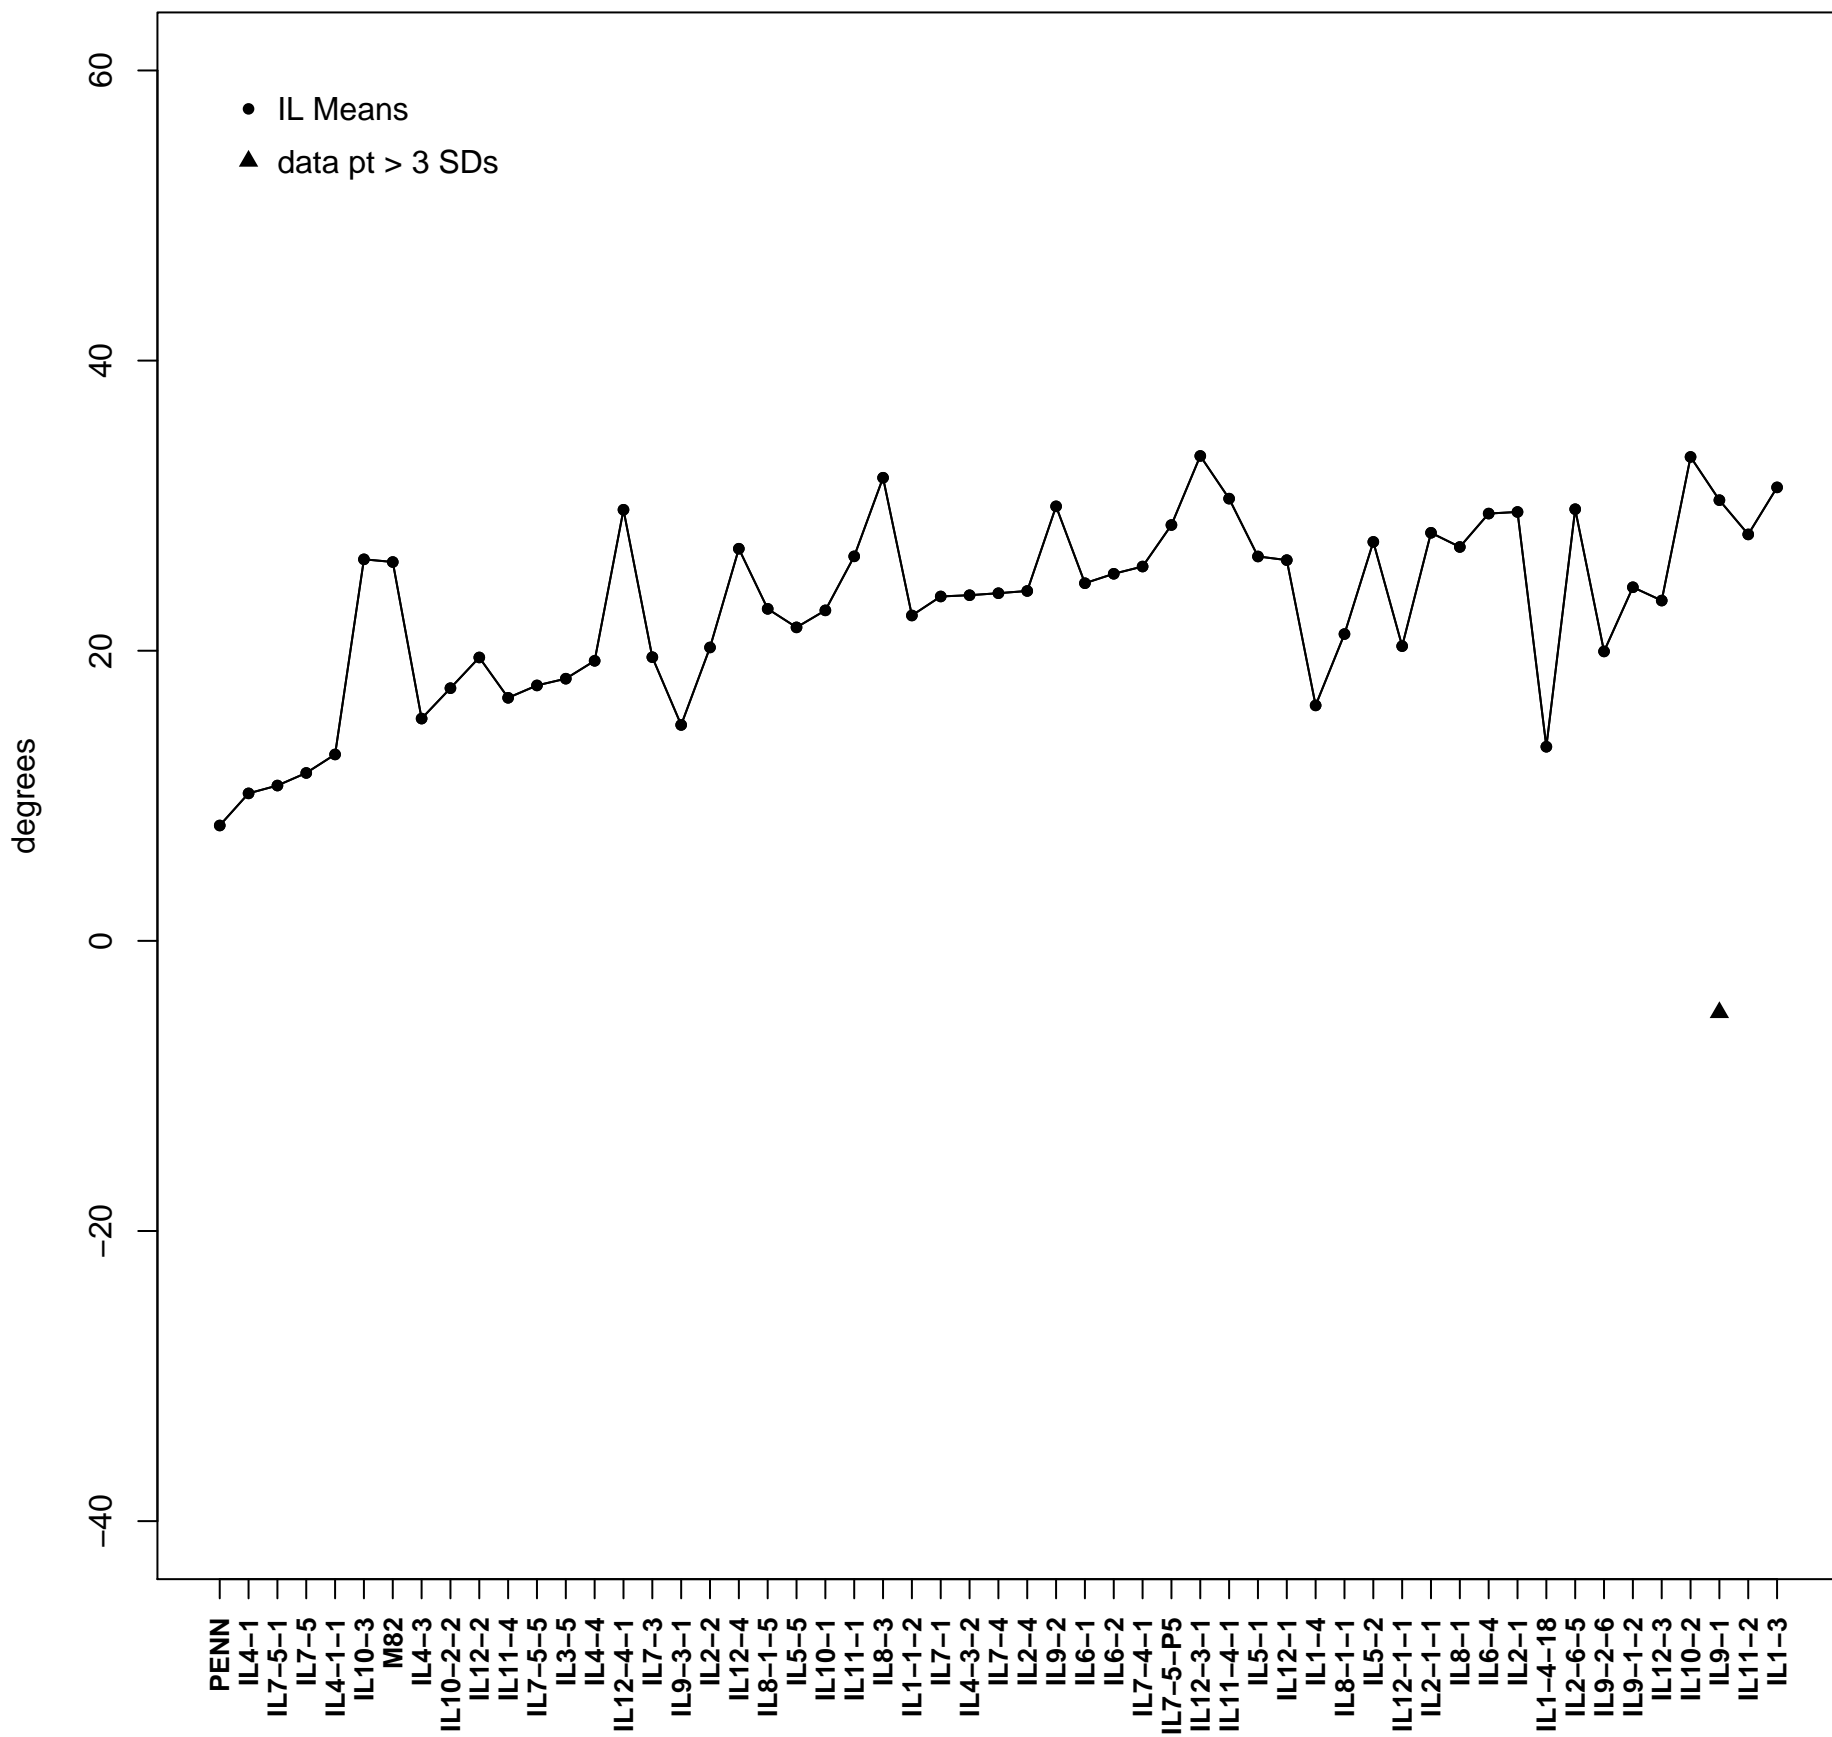

Data for trait T27

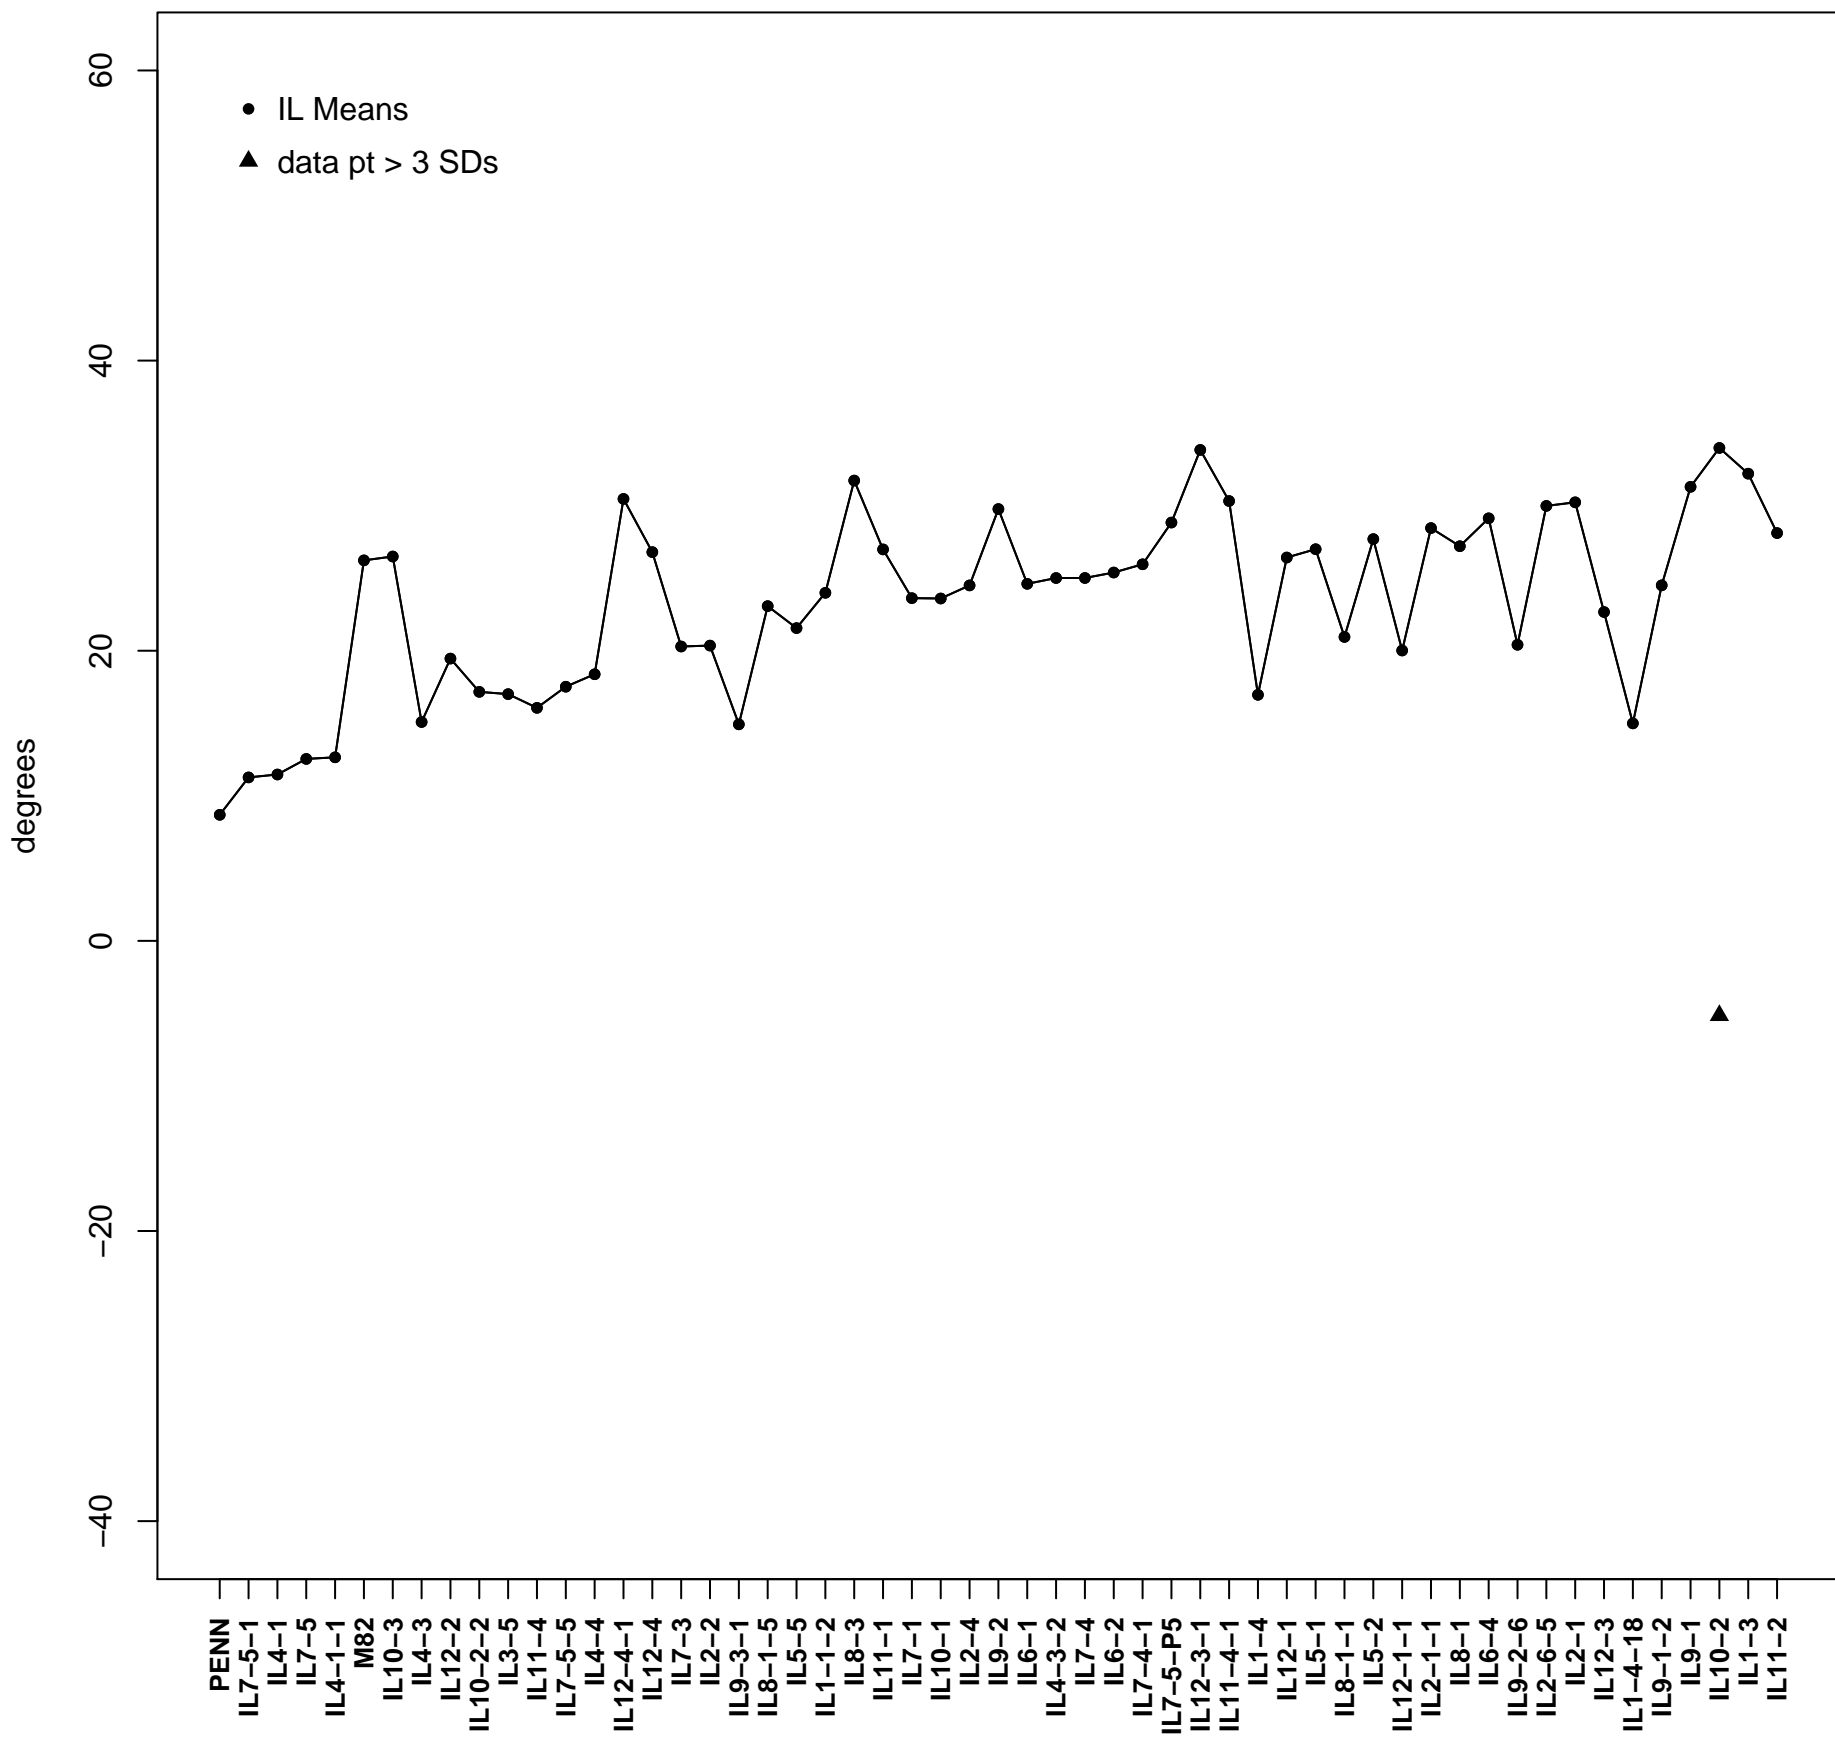

Data for trait T28

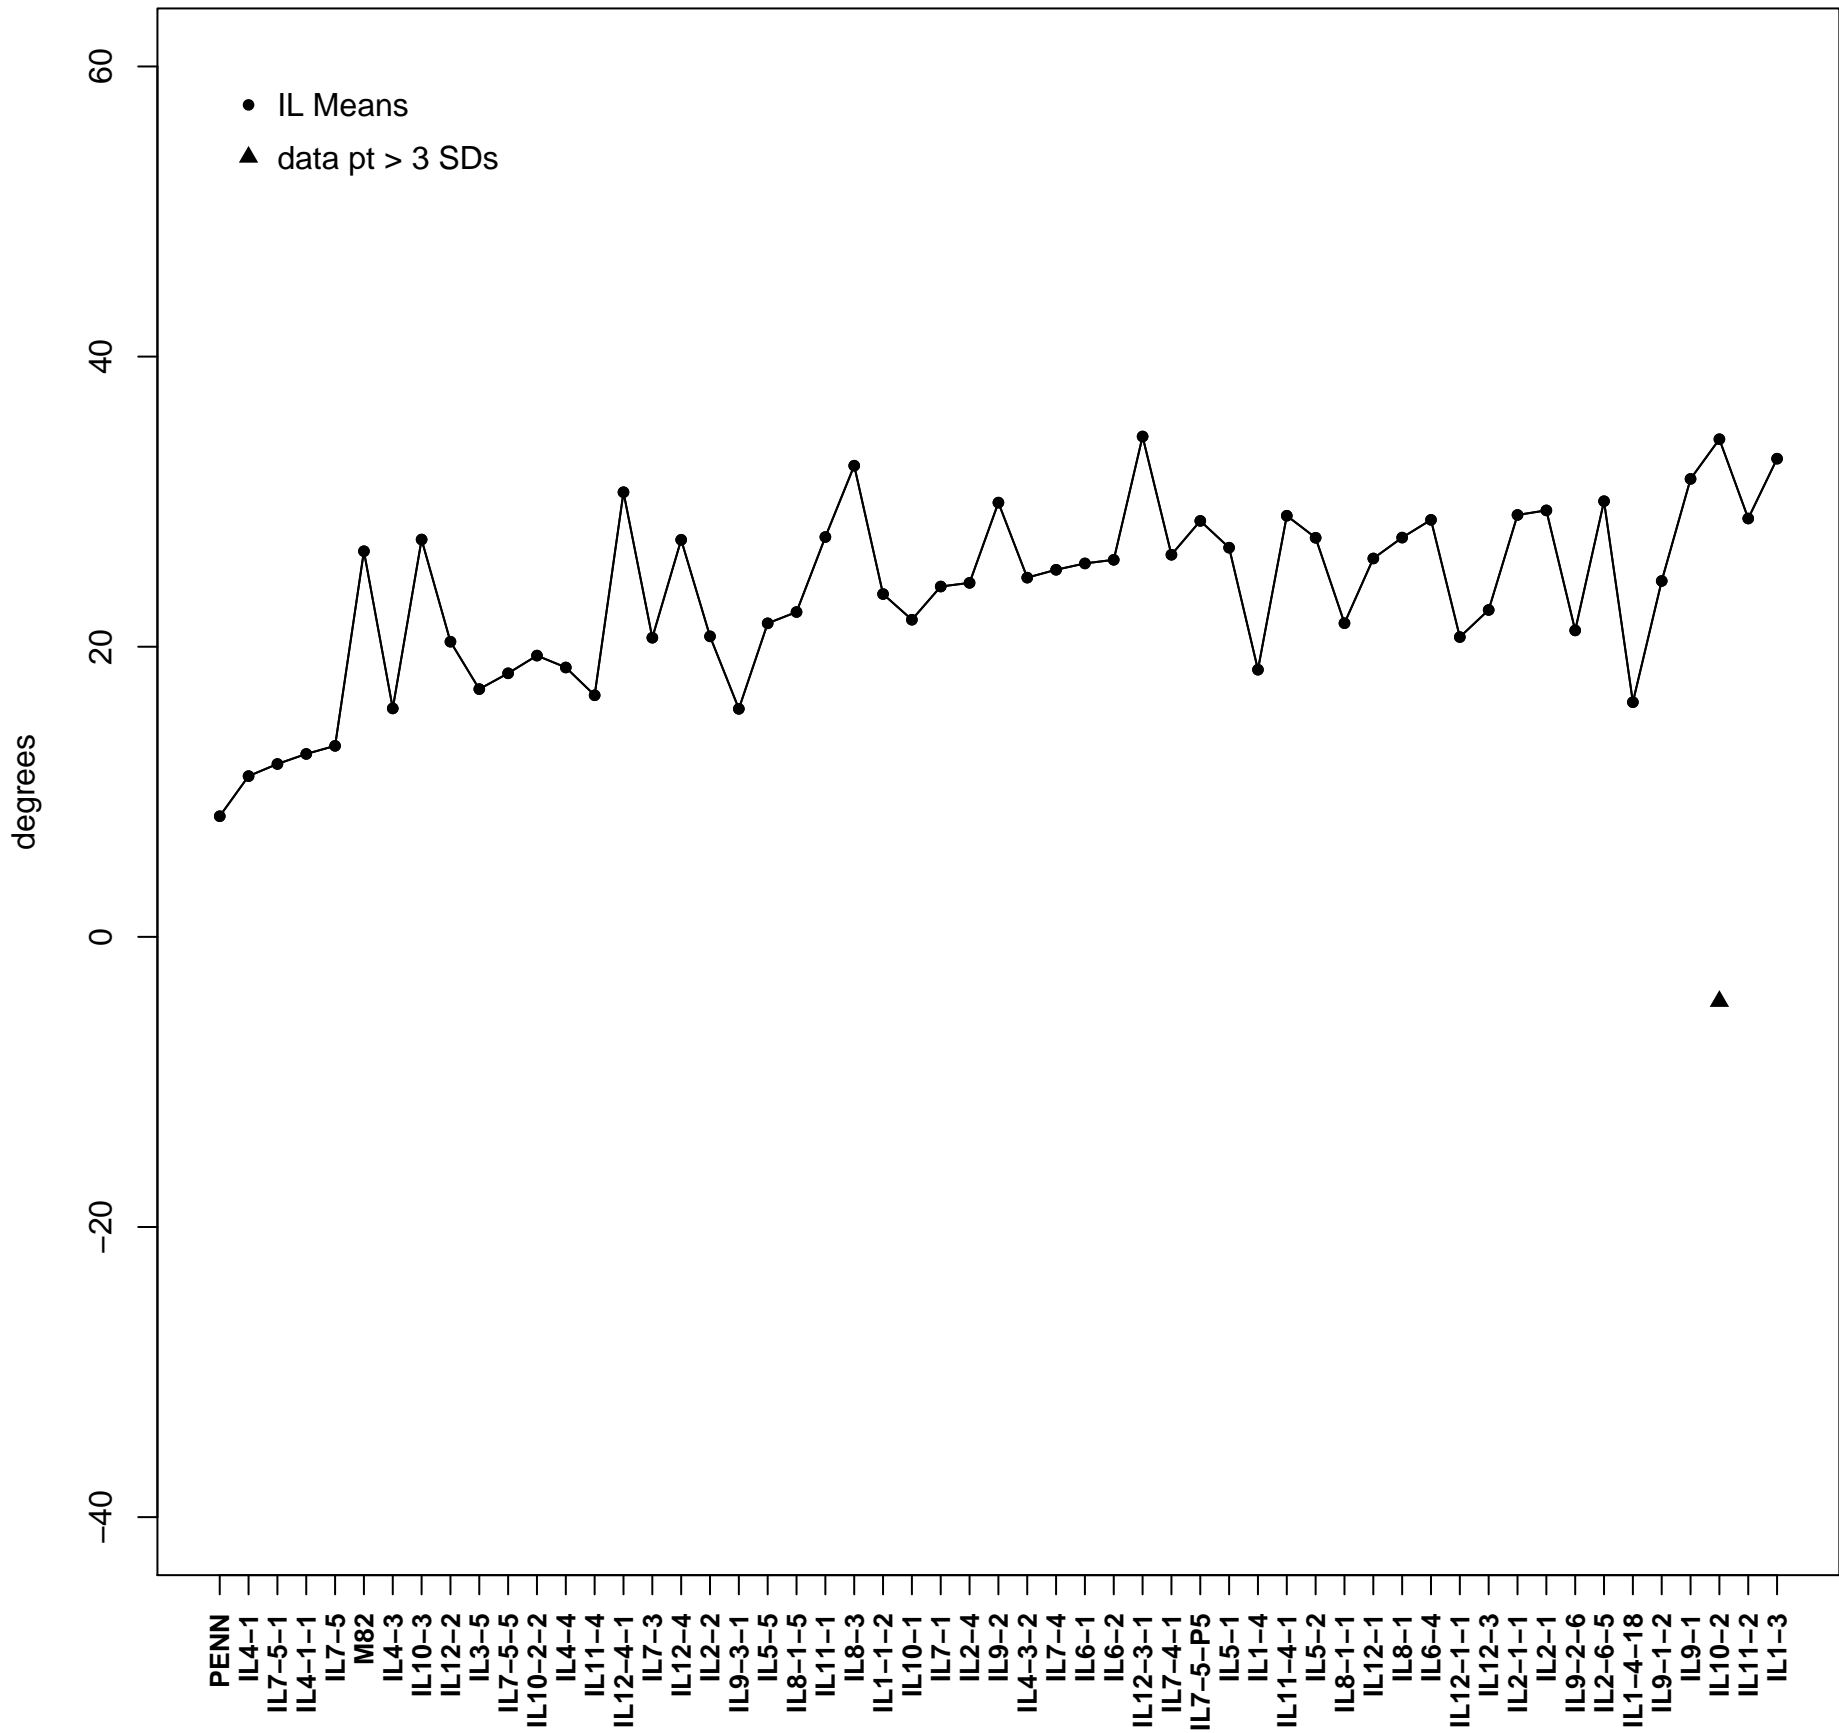

Data for trait T29

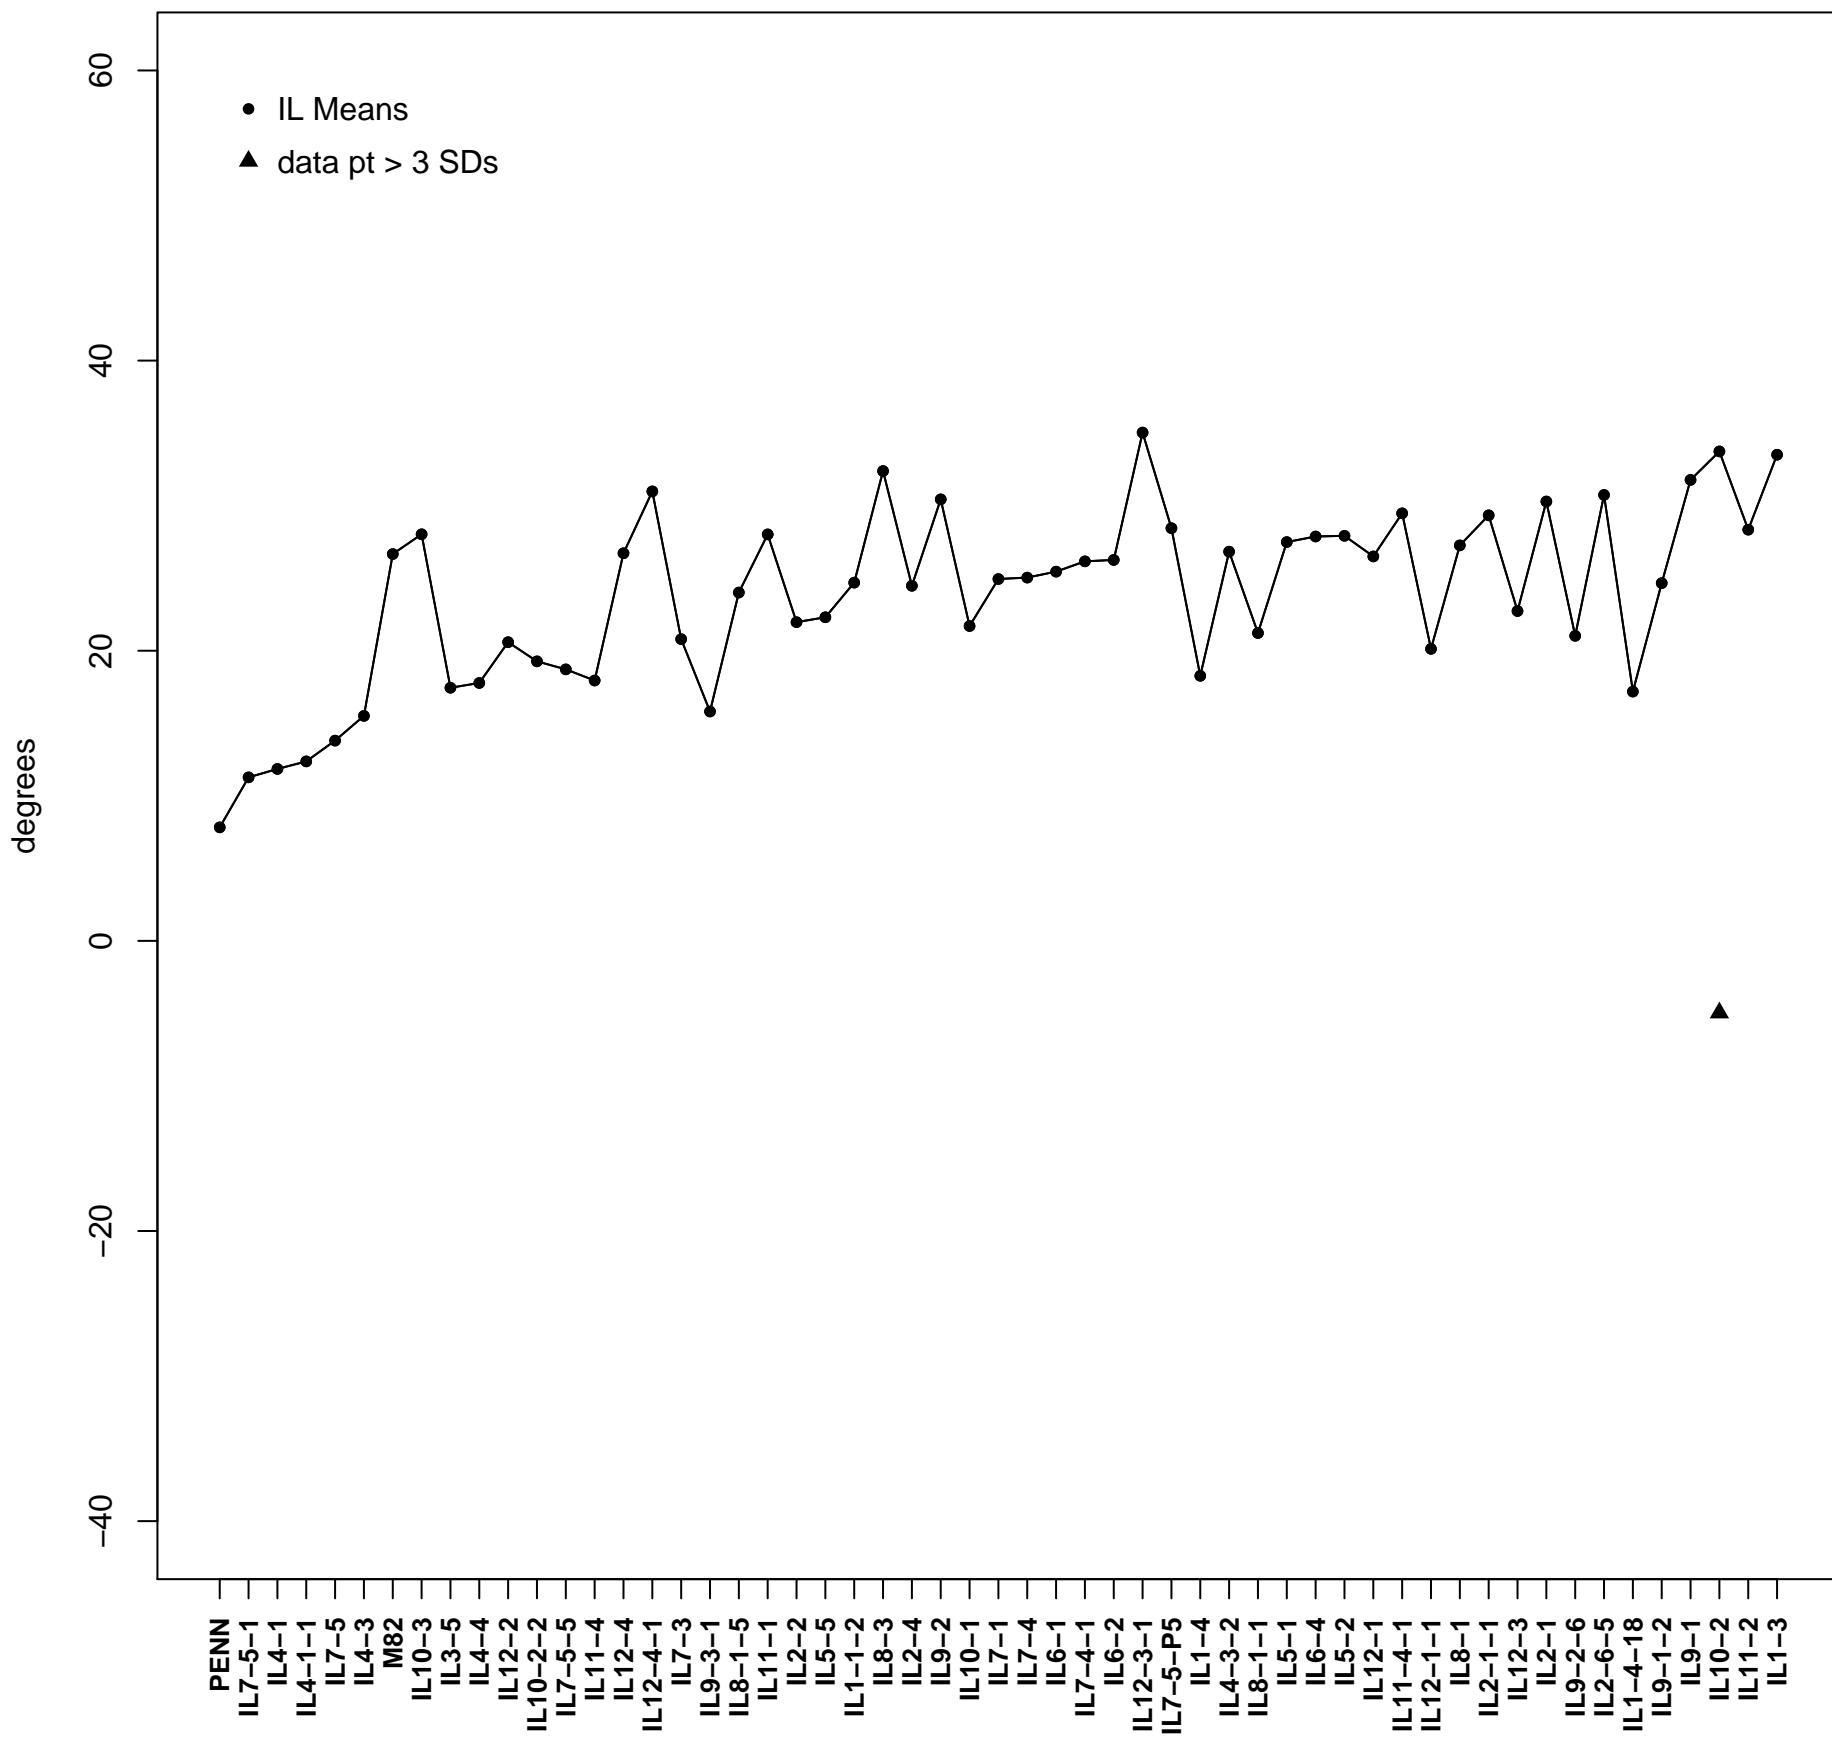

Data for trait T30

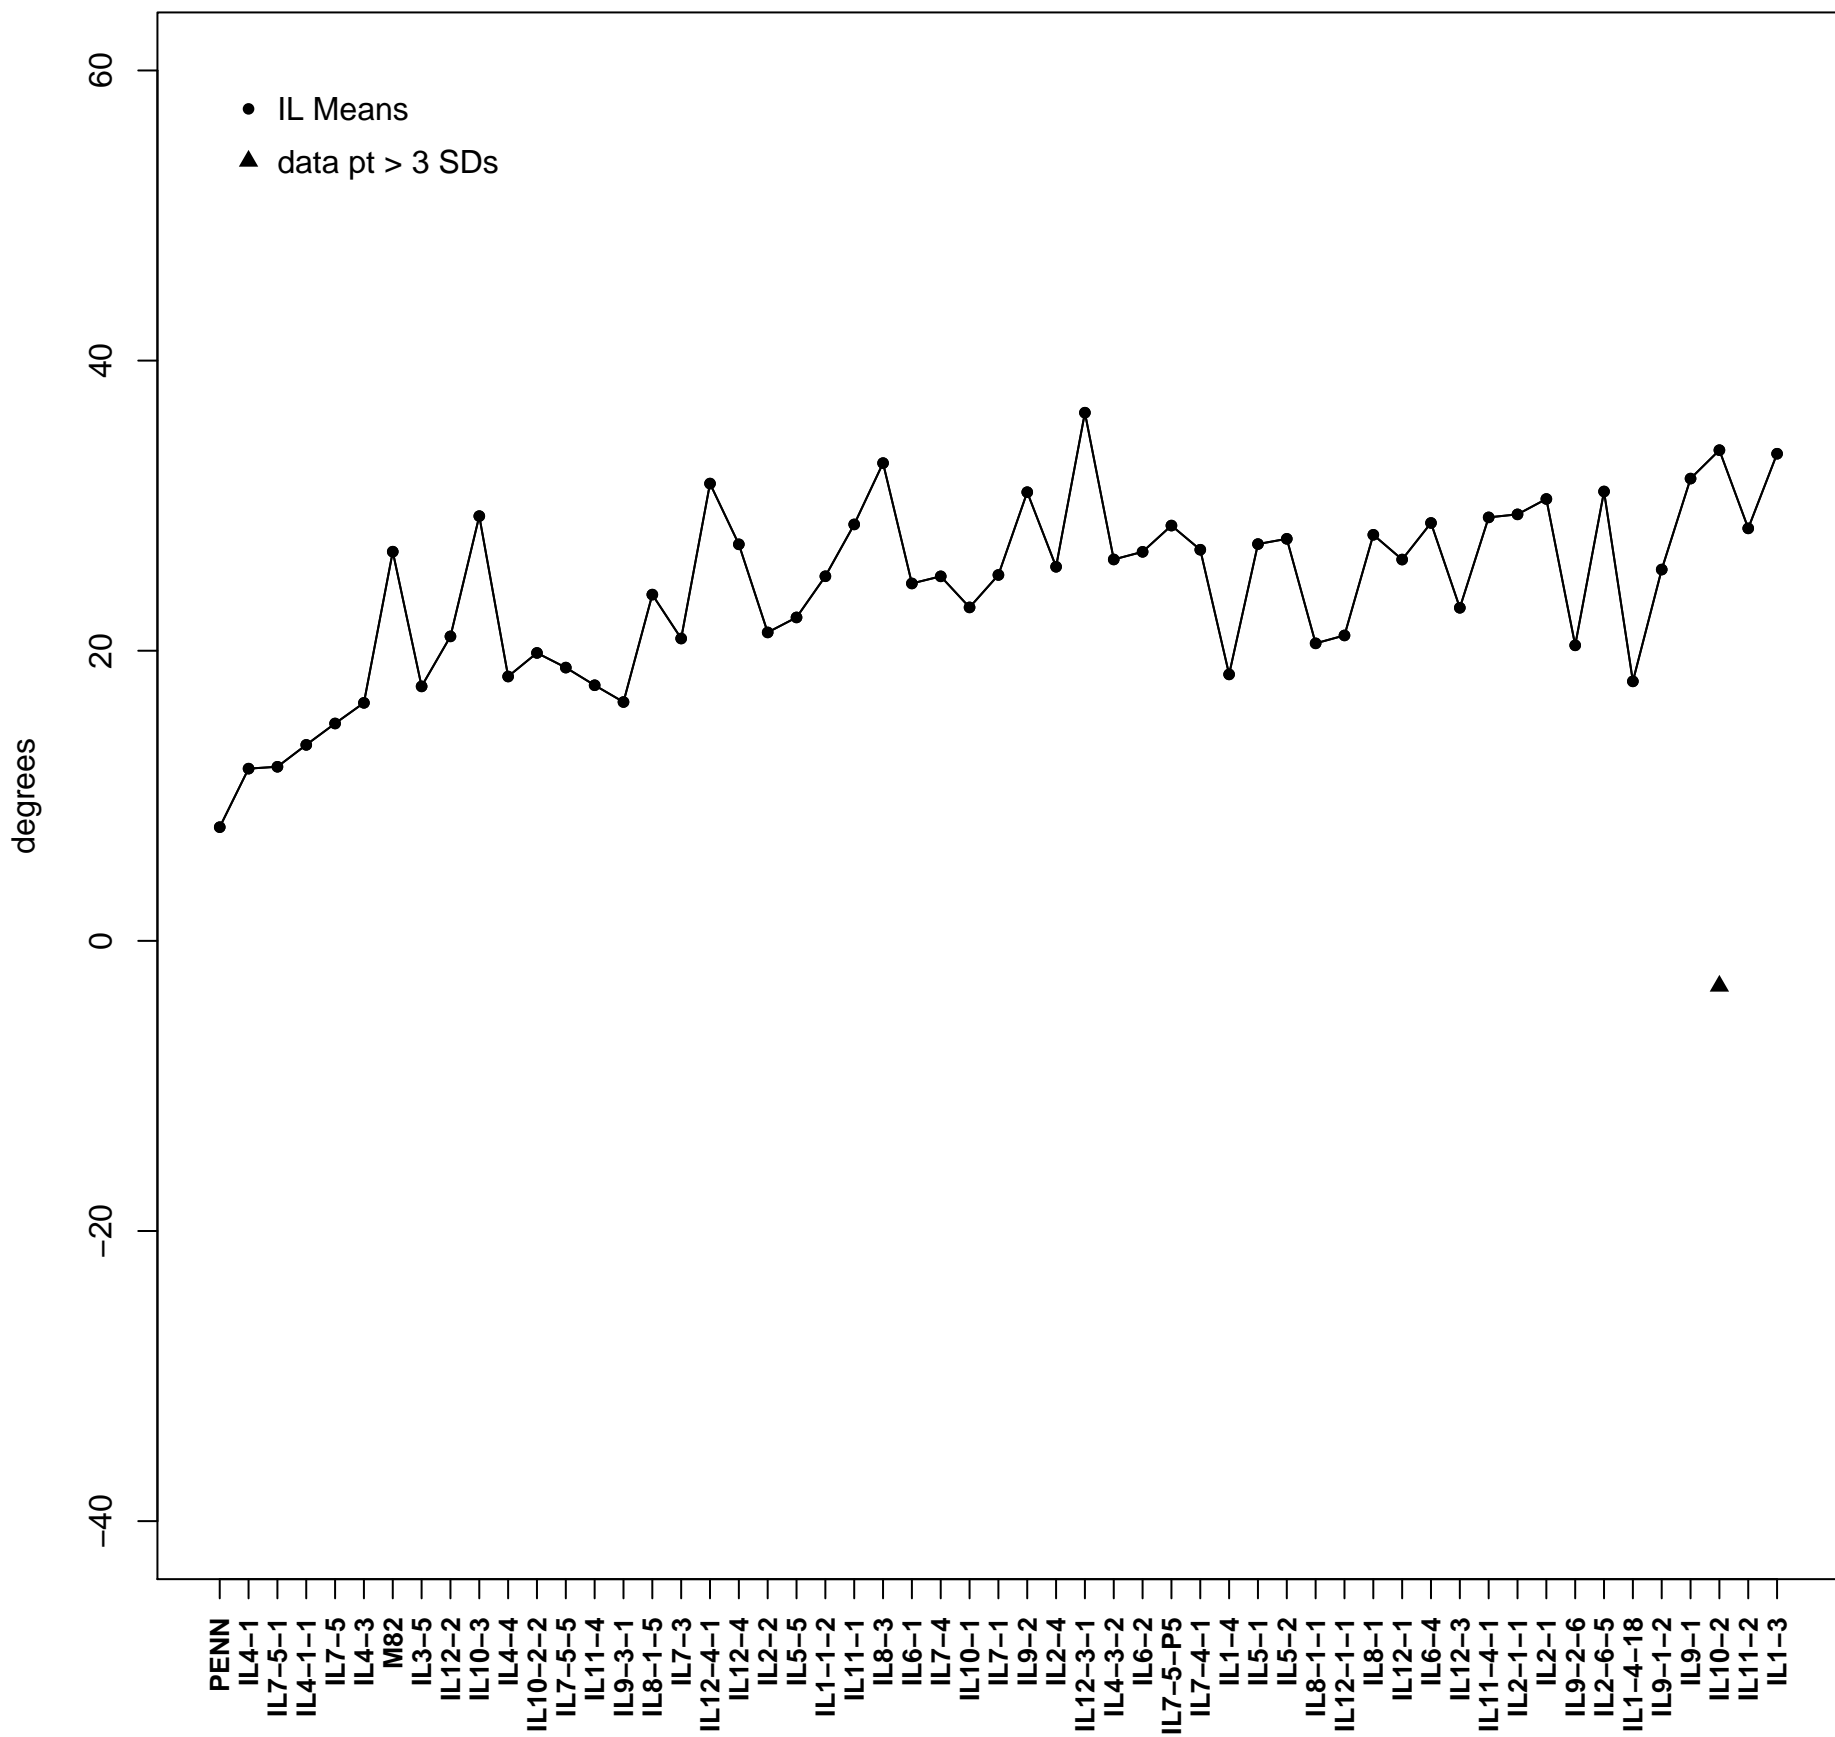

Data for trait T31

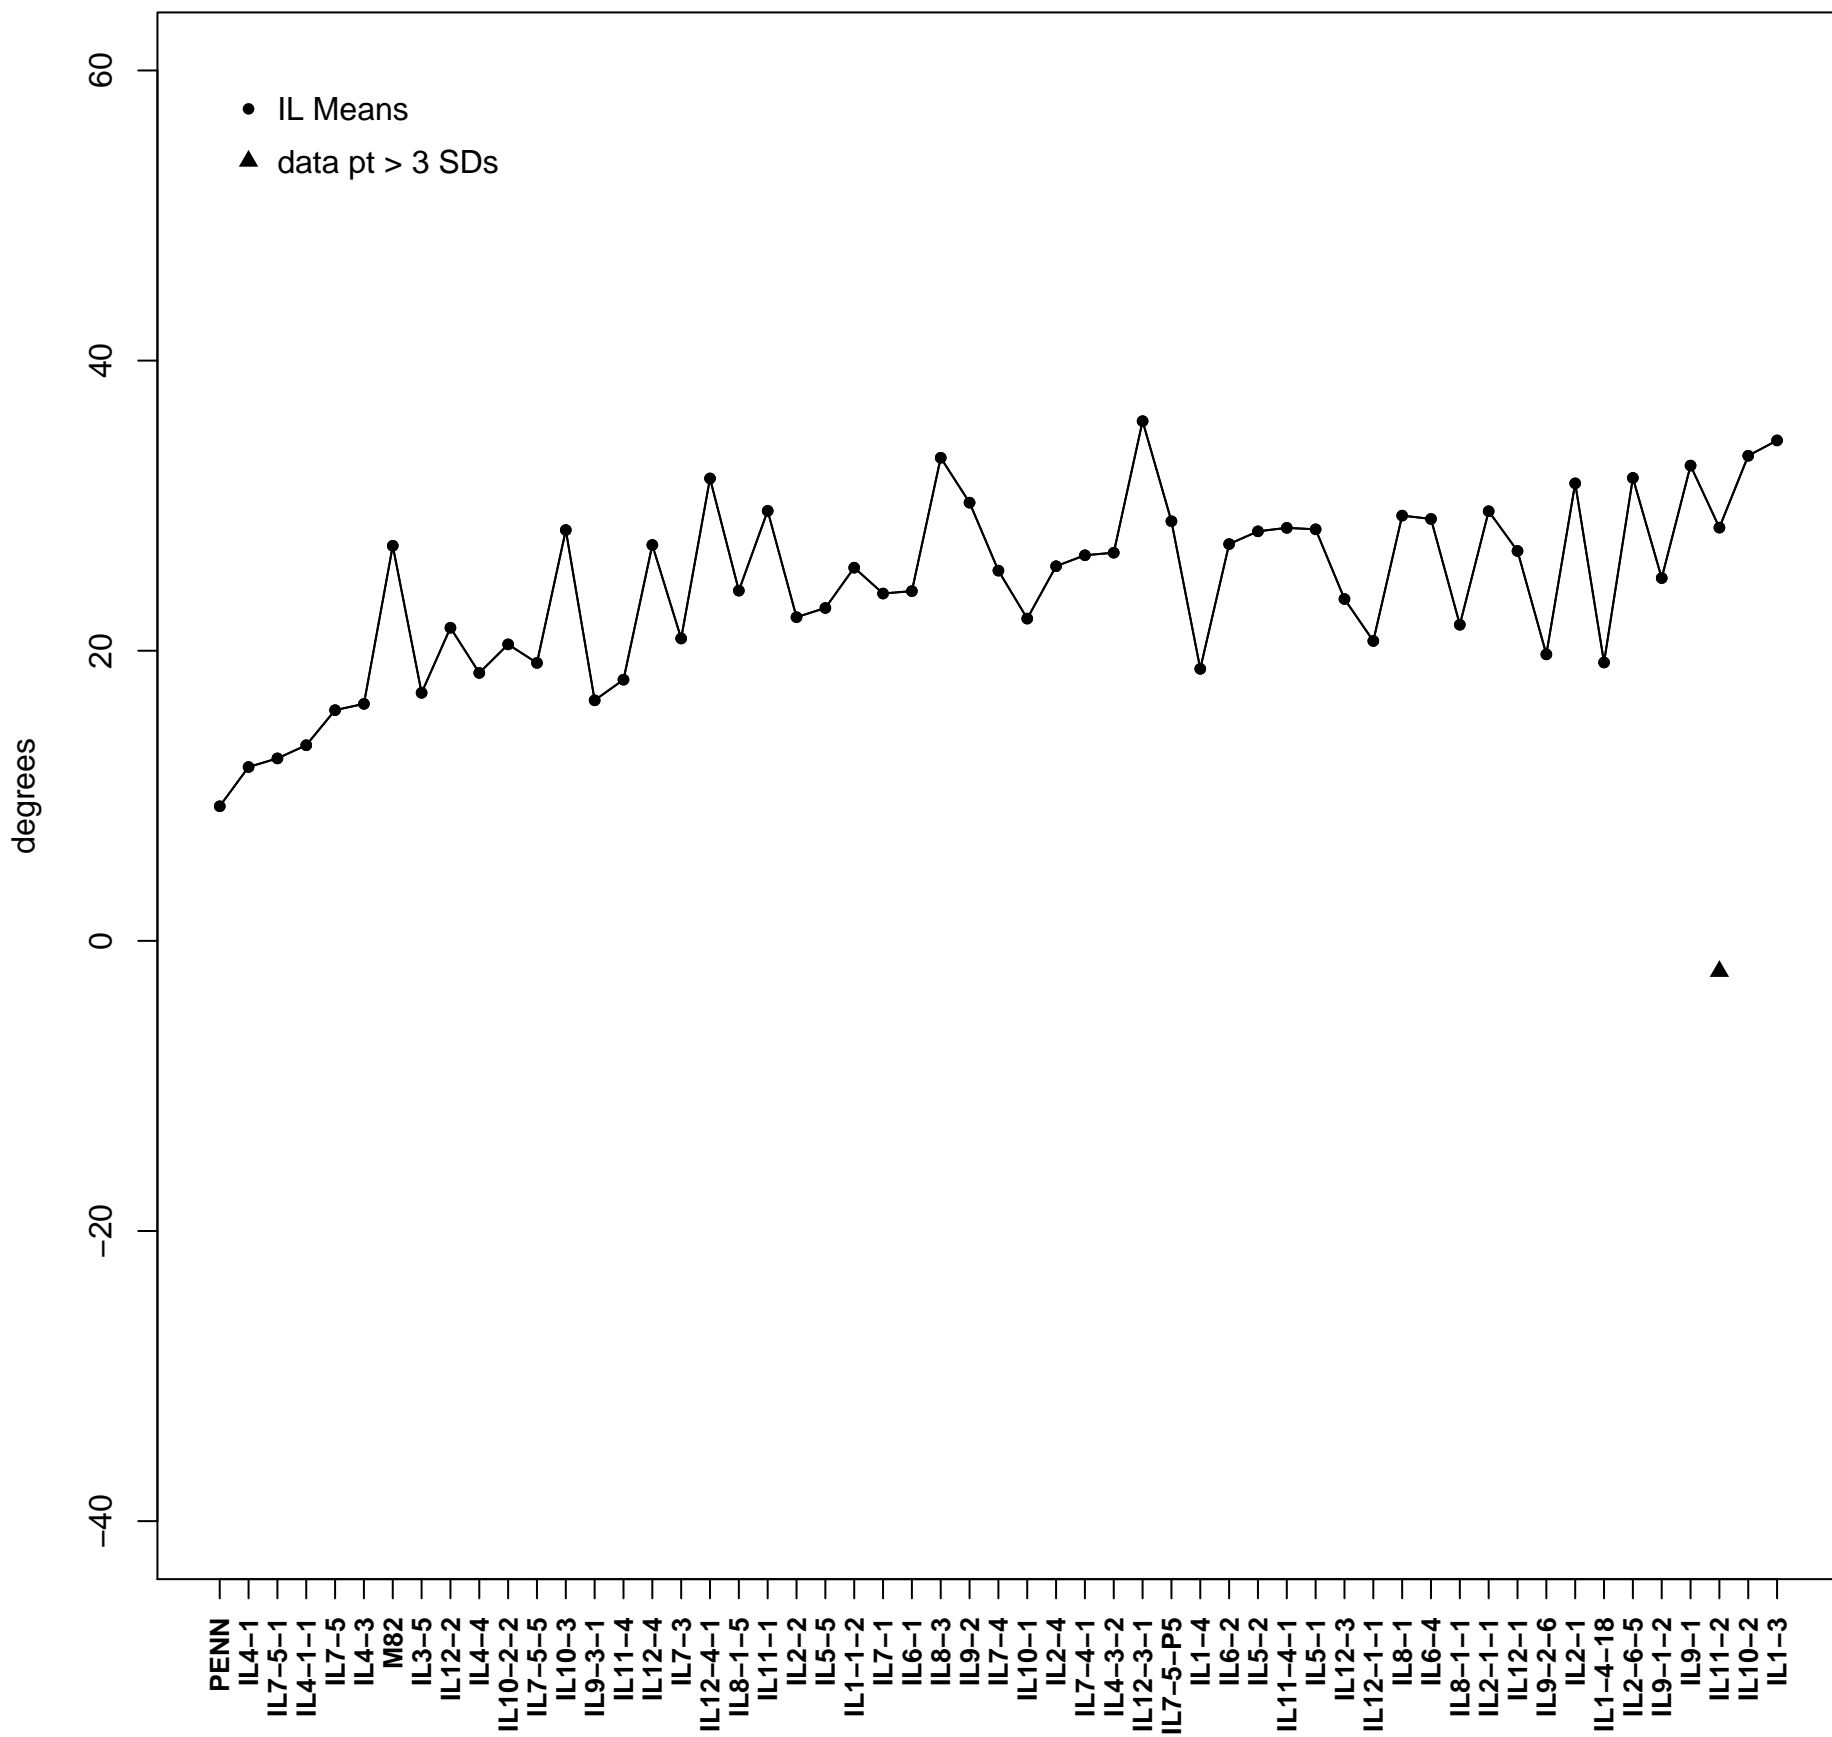



Data for trait T32

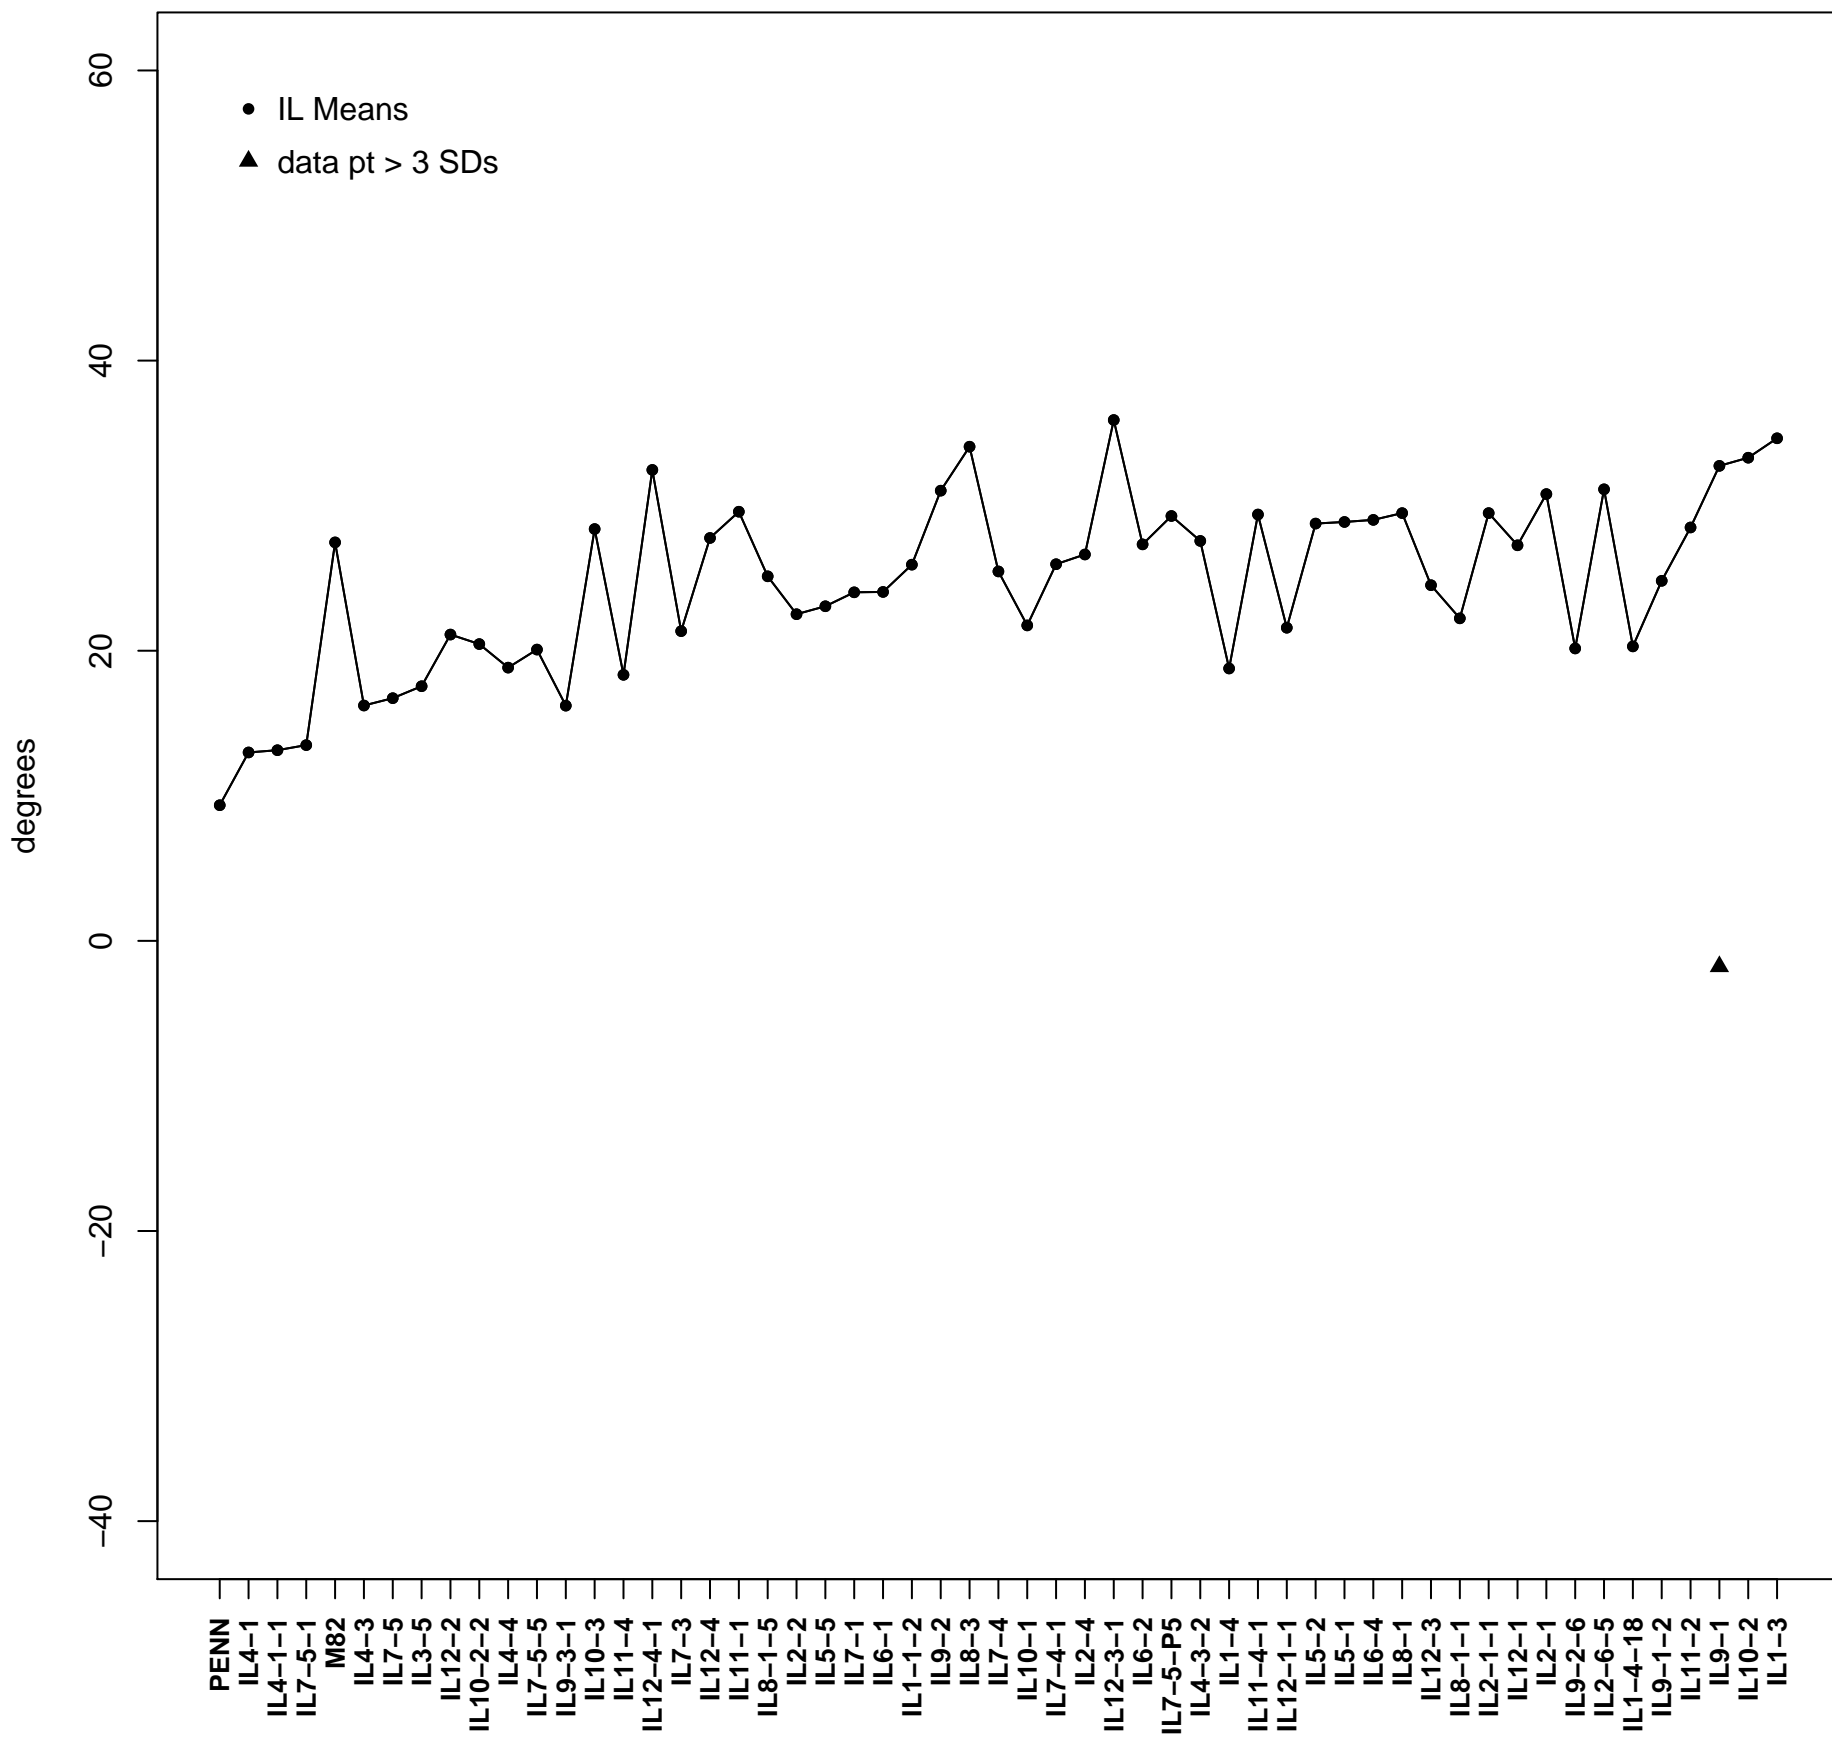

Data for trait T33

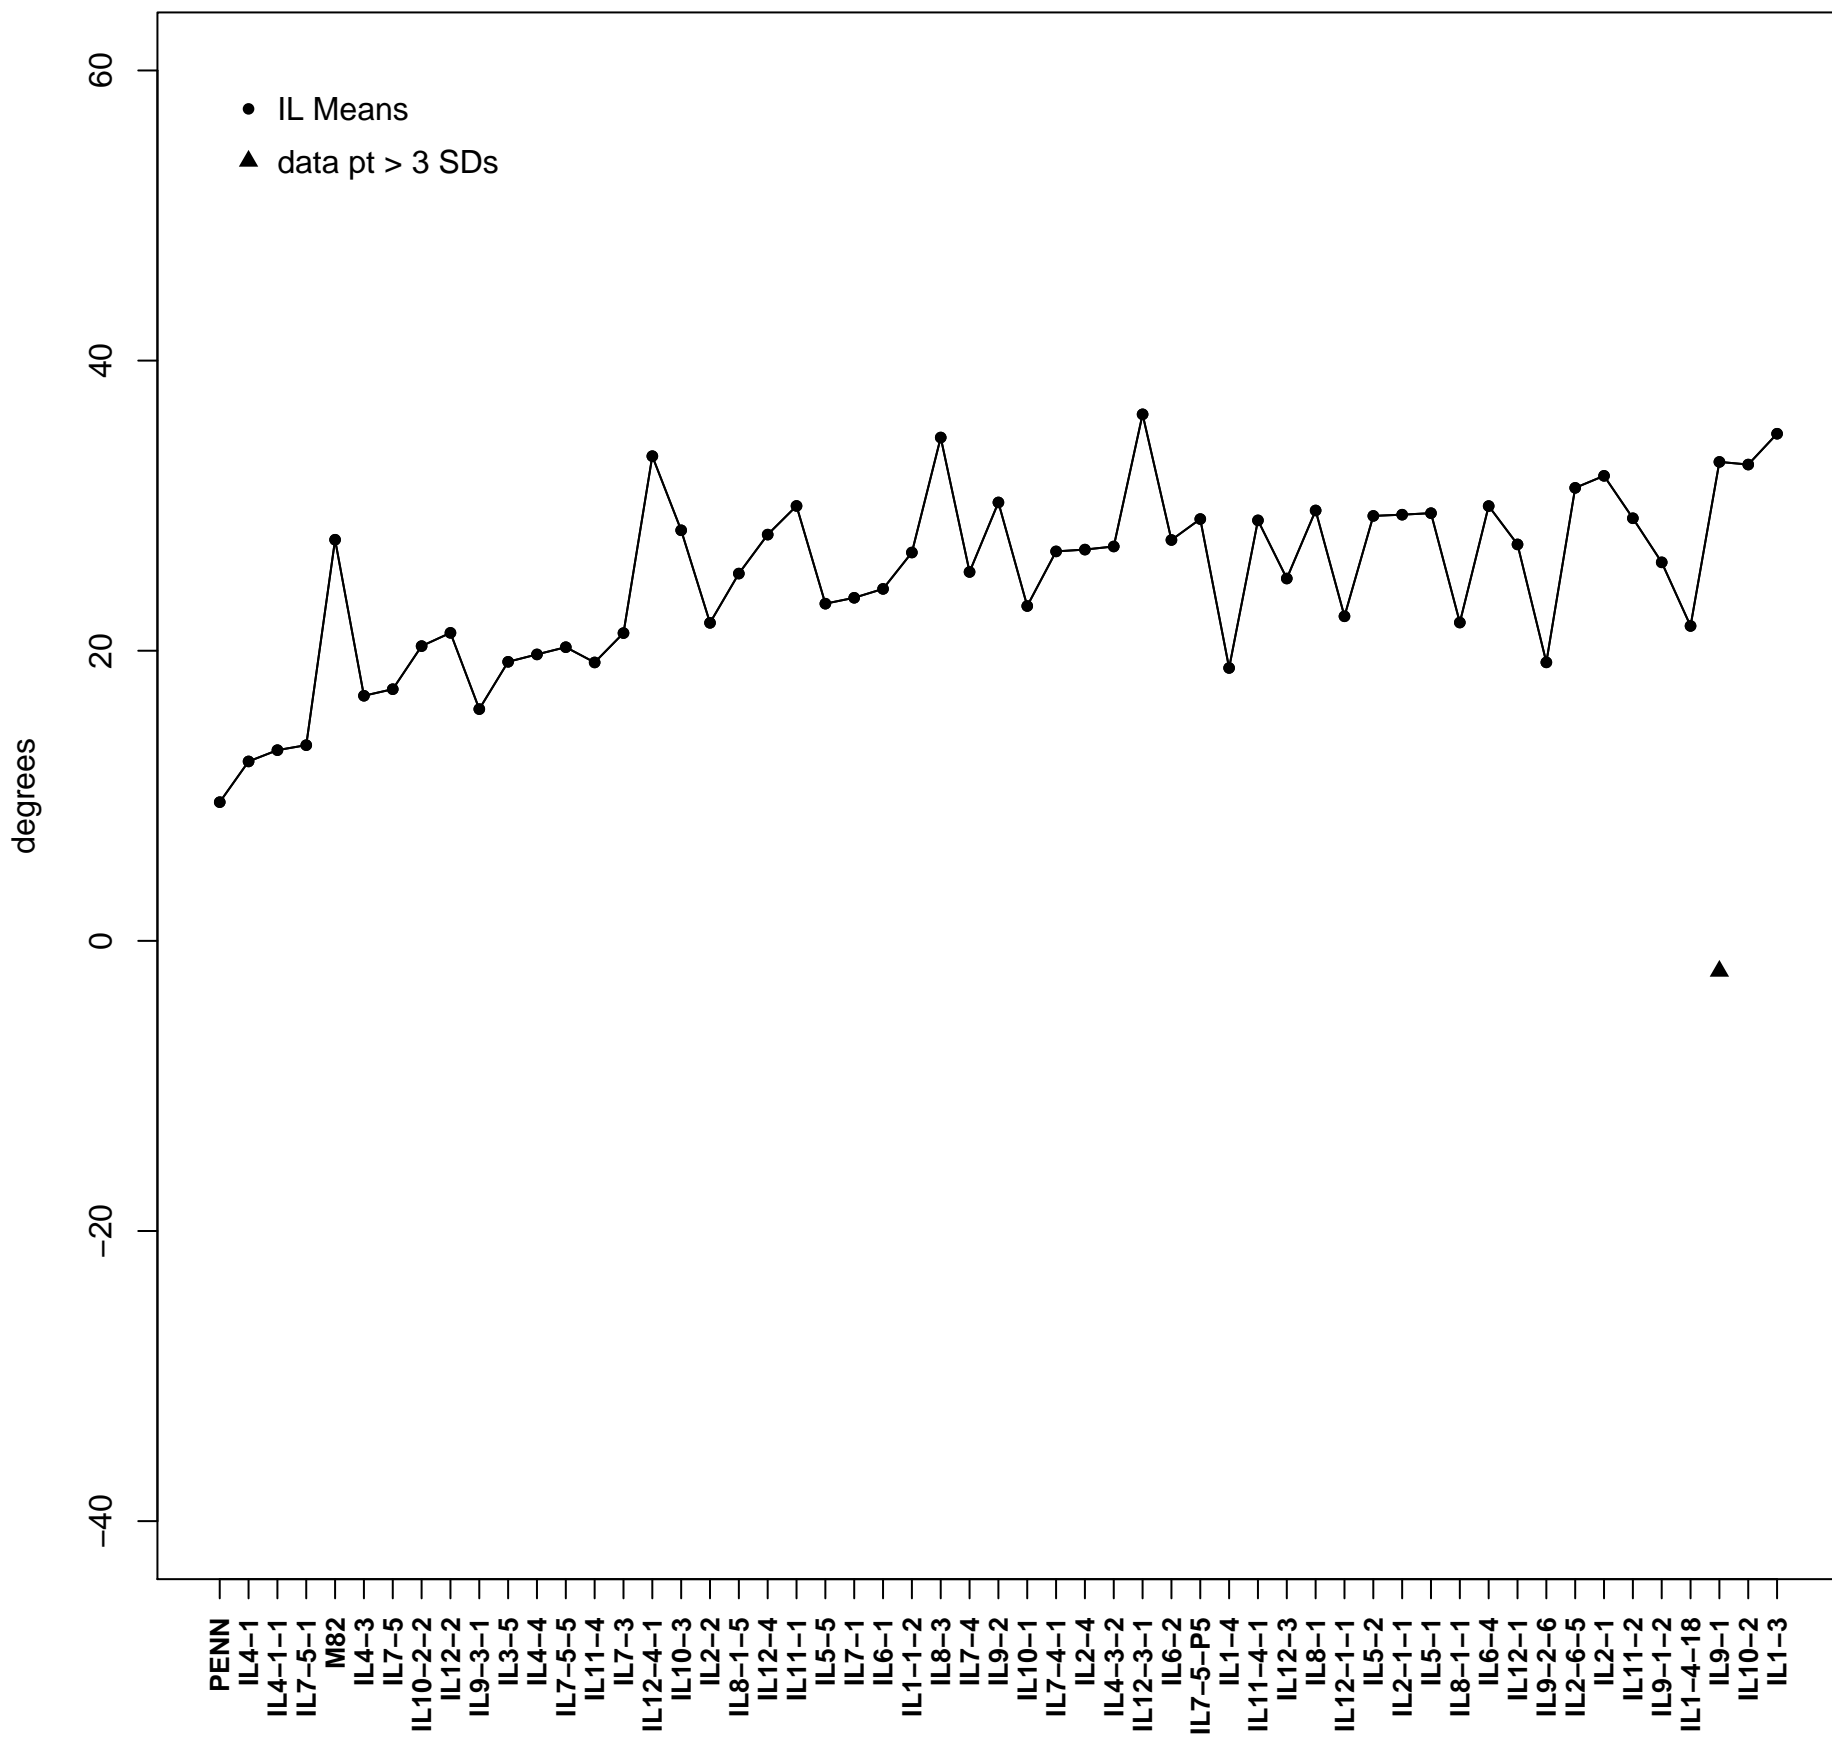

Supplement: Supplementary file 14 [file 2]
