# Supplementary material
Source: publisher figshare collection journal article supplement (https://gsajournals.figshare.com/articles/dataset/_/7237562)

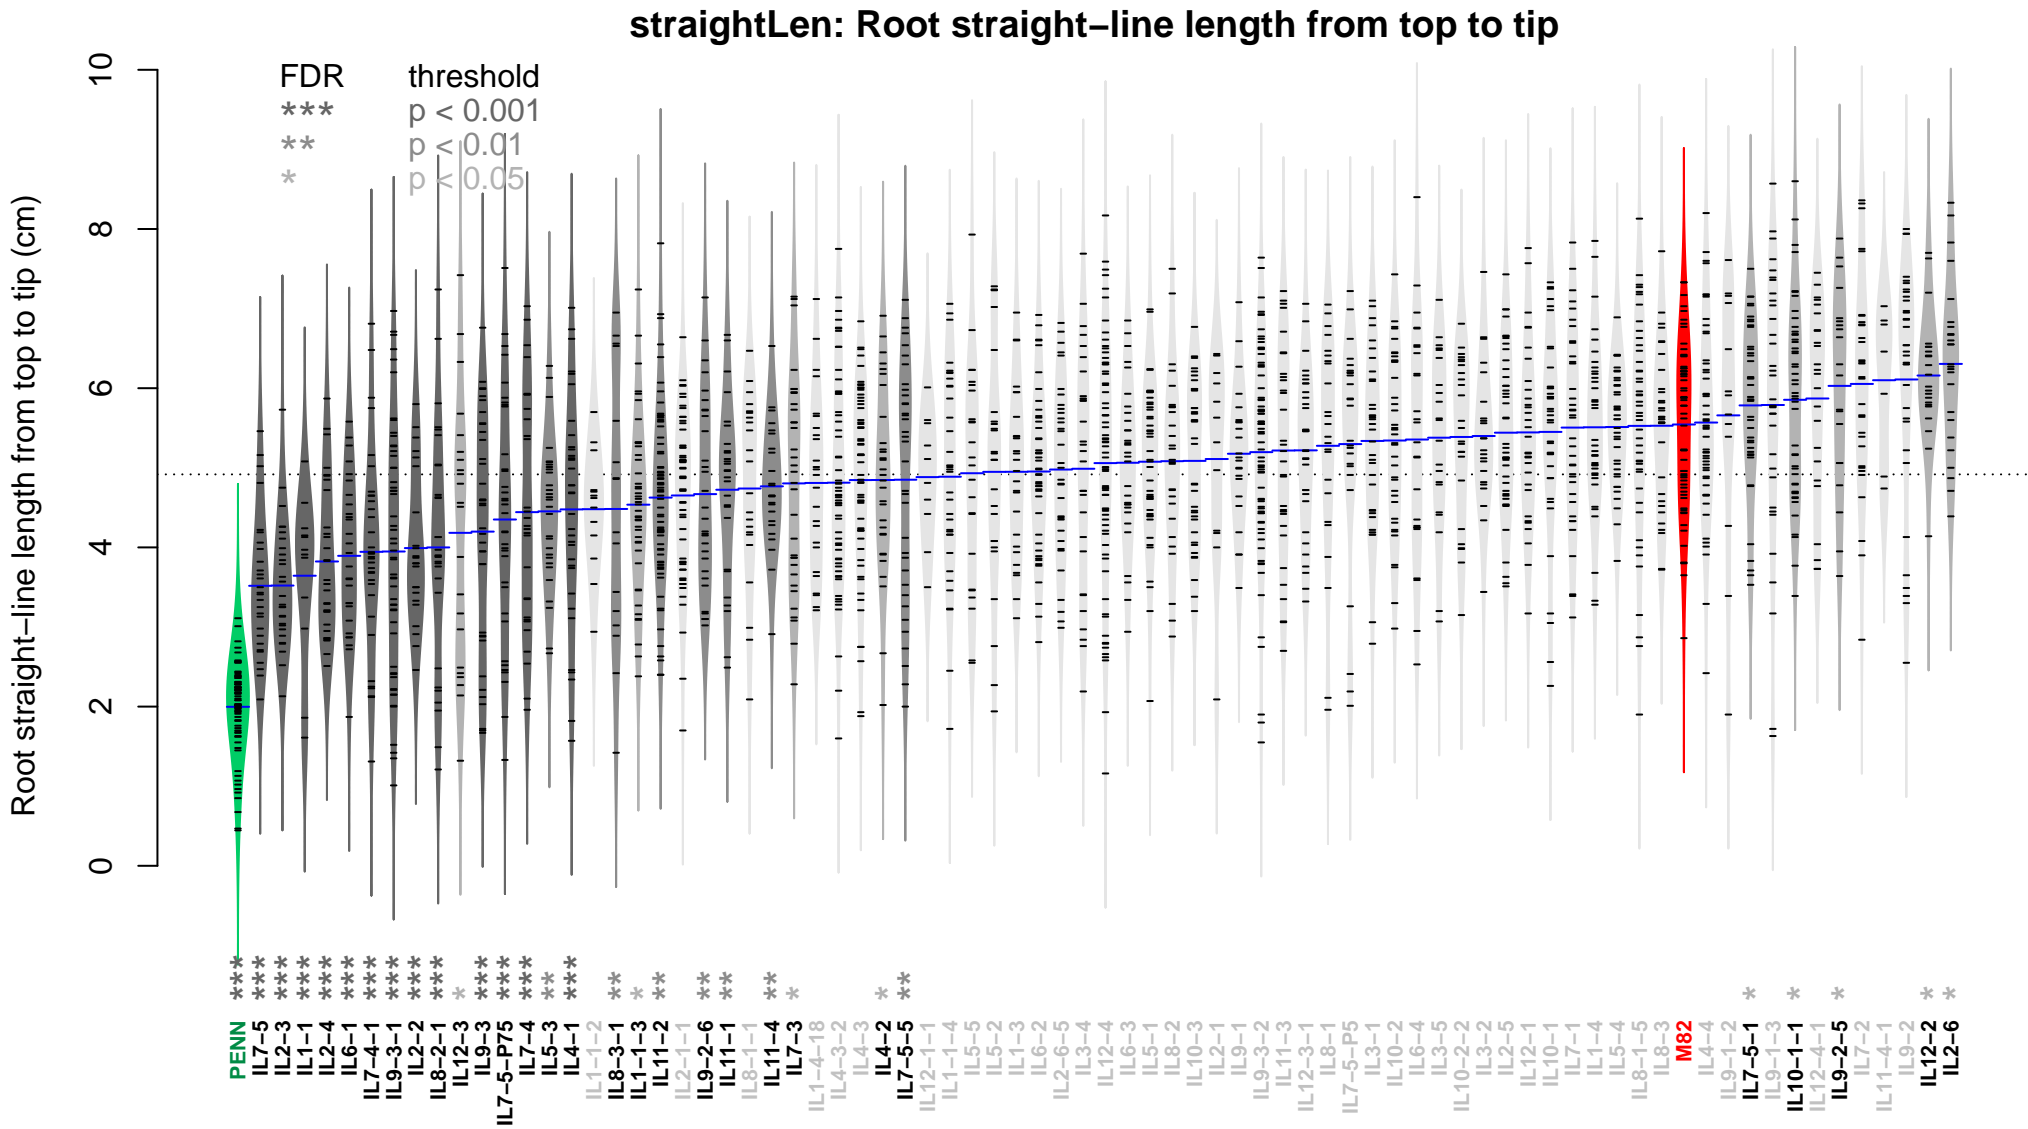

Root length from top to tip (cm)

10  
8  
6  
4  
2  
0

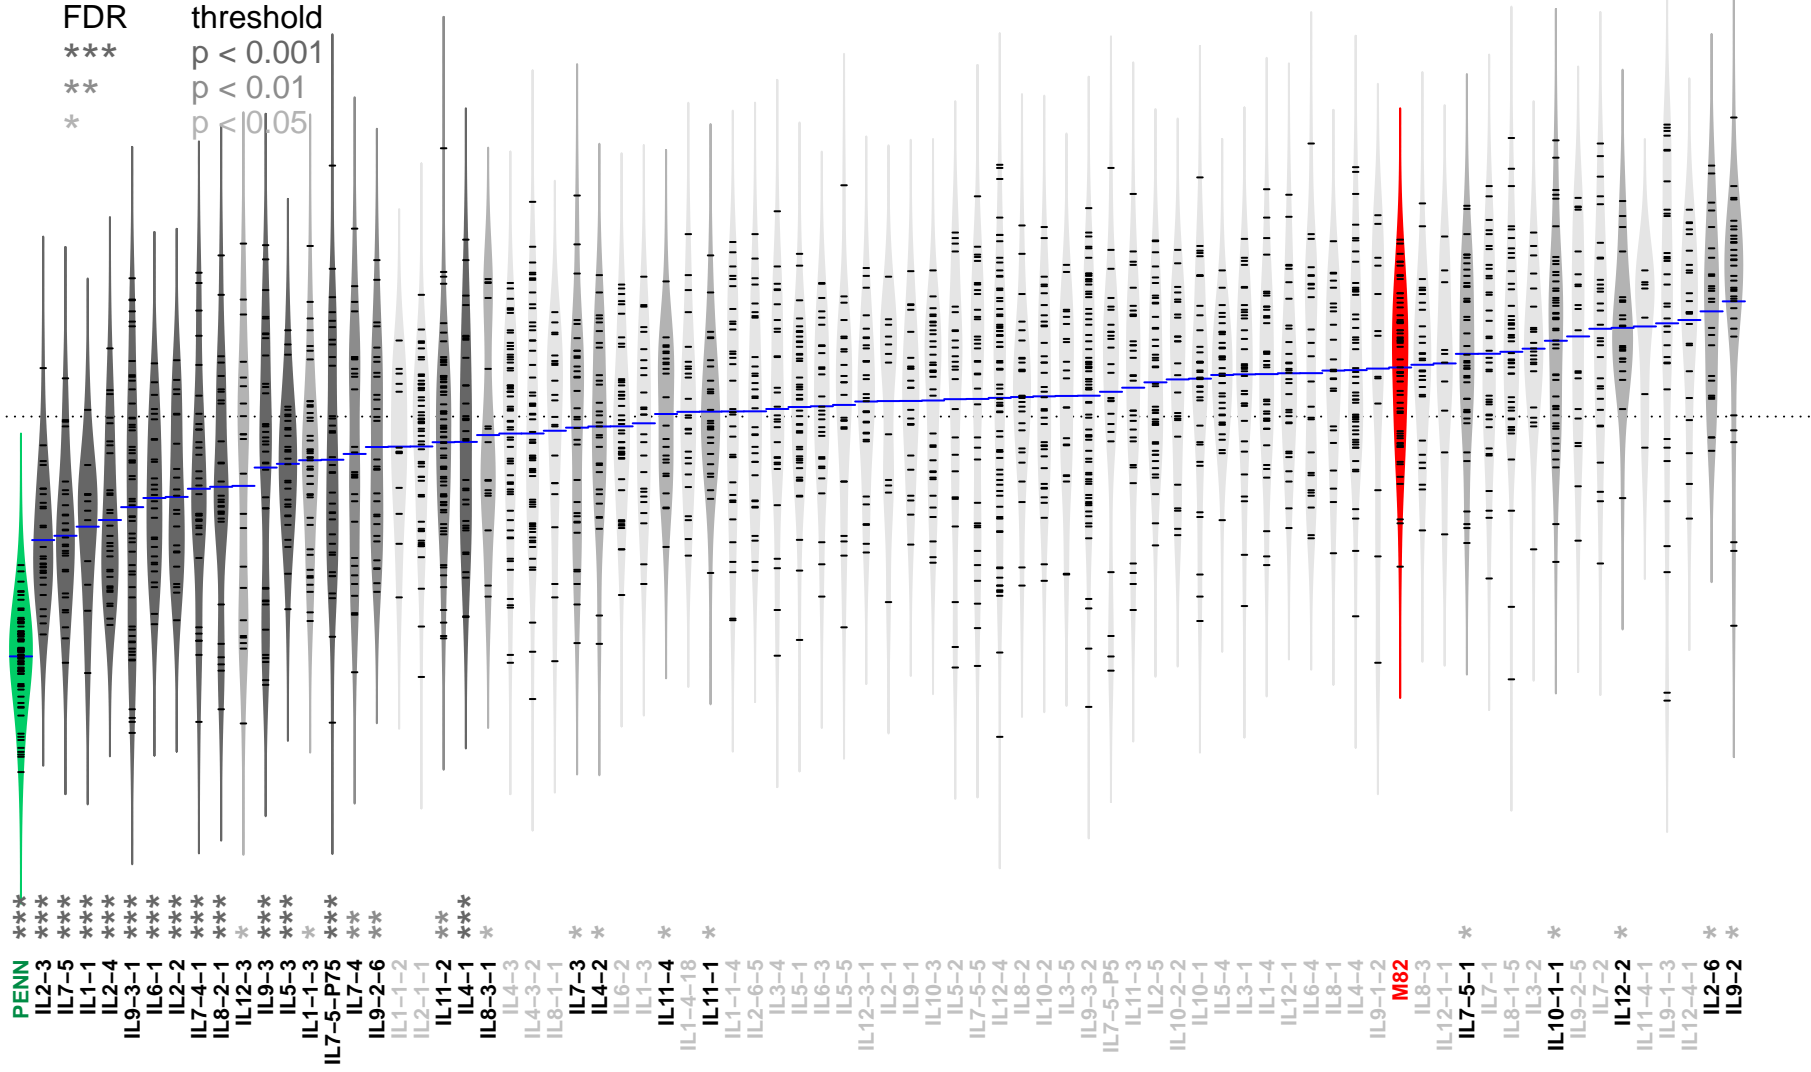

Angle of tip of root (degrees)

100  
80  
60  
40  
20  
0

IL11-4-1  
IL12-4-1  
IL6-4  
IL3-5  
IL7-5-1  
IL1-1  
IL5-4  
IL9-1  
IL10-3  
**M82**  
IL12-3  
IL8-3  
IL4-4  
IL11-3  
IL9-2-5  
IL3-2  
IL10-2  
IL1-1-4  
IL9-3-2  
IL12-2  
IL5-1  
IL7-2  
IL10-2-2  
IL7-3  
IL7-5-P5  
IL10-1  
IL1-1-3  
IL4-3-2  
IL1-4  
IL6-1  
IL9-2  
IL6-3  
IL7-1  
IL12-3-1  
IL2-5  
IL5-5  
IL6-2  
IL5-2  
IL4-3  
IL8-1-1  
IL8-1  
IL10-1-1  
IL2-4  
IL9-3-1  
IL1-4-18  
IL9-3  
IL1-3  
IL2-6-5  
IL3-4  
IL8-2  
IL2-1  
IL8-3-1  
IL12-1  
IL12-1-1  
IL3-1  
IL11-1  
IL2-6  
**\***  
IL11-2  
IL7-5-5  
IL11-4  
IL9-1-3  
IL1-1-2  
IL9-2-6  
**\***  
IL4-2  
IL8-1-5  
IL2-1-1  
IL2-3  
IL7-4  
IL9-1-2  
IL12-4  
IL2-2  
IL7-5-P75  
IL5-3  
IL4-1  
IL7-5  
IL7-4-1  
IL8-2-1  
**PENN**  
**\*\*\***

FDR  
\*\*\*  
\*\*  
\*  
threshold  
 $p < 0.001$   
 $p < 0.01$   
 $p < 0.05$

tipAng: Angle of tip of root

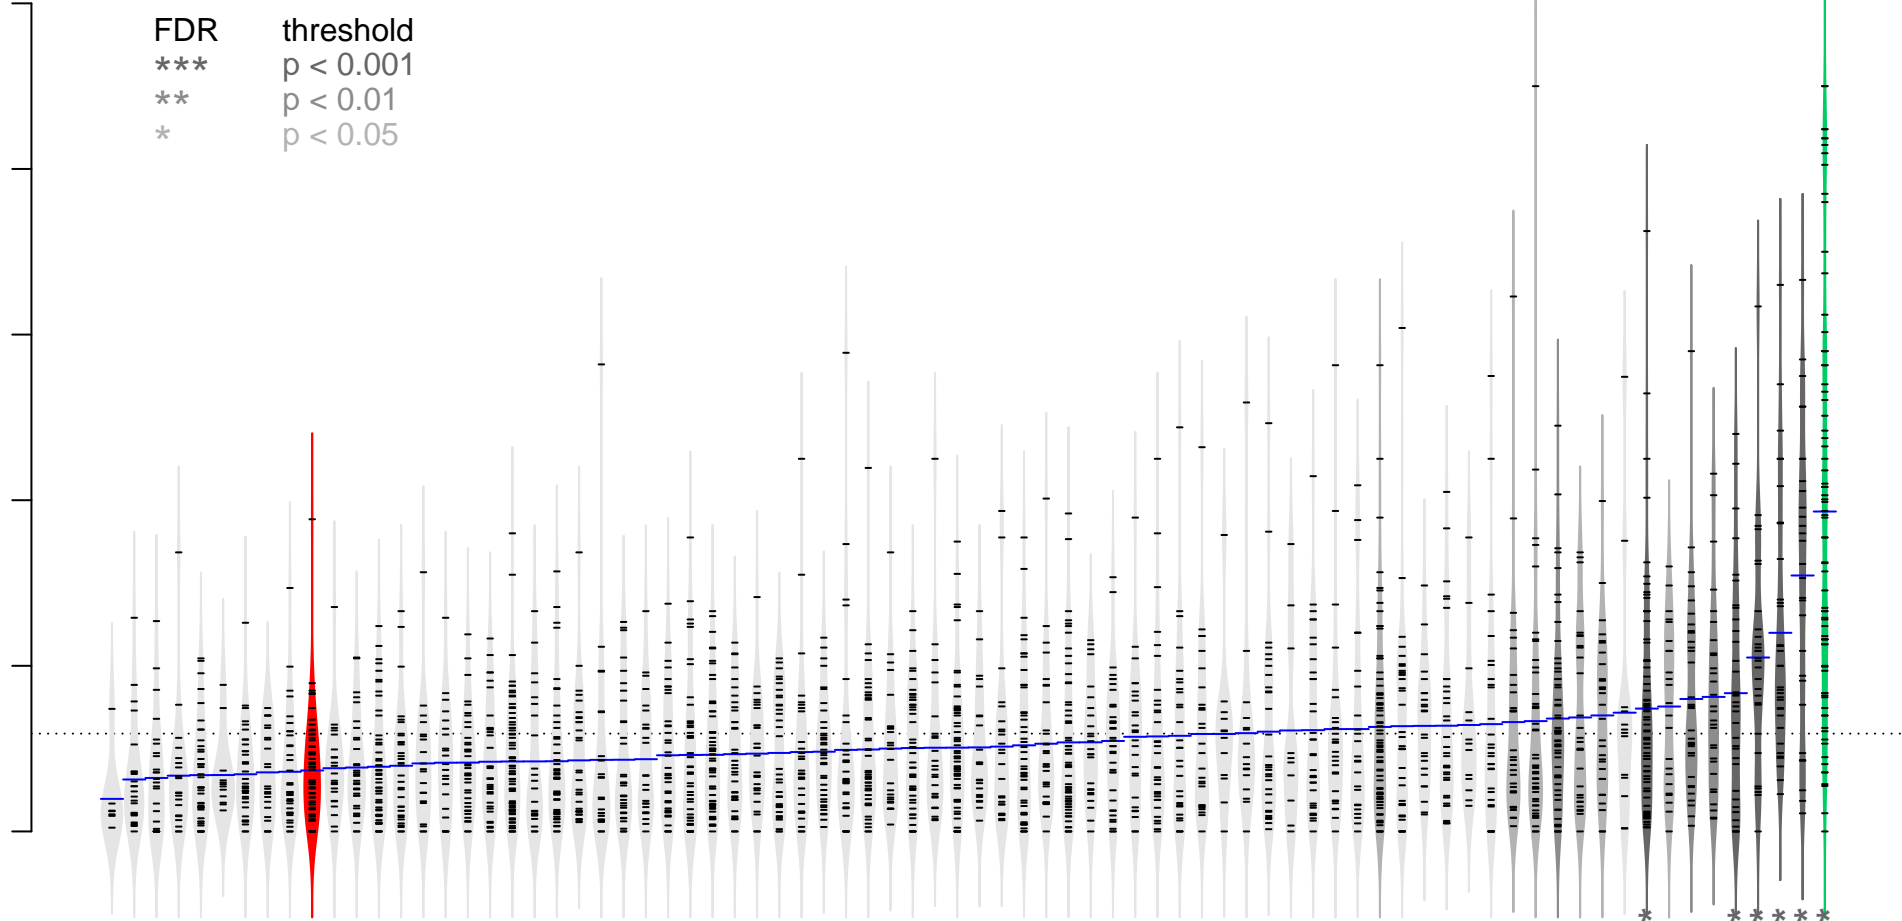

Average of absolute value of angle along entire root (degrees)

avgAbsAng: Average of absolute value of angle along entire root

FDR  
\*\*\*  
\*\*  
\*

threshold  
 $p < 0.001$   
 $p < 0.01$   
 $p < 0.05$

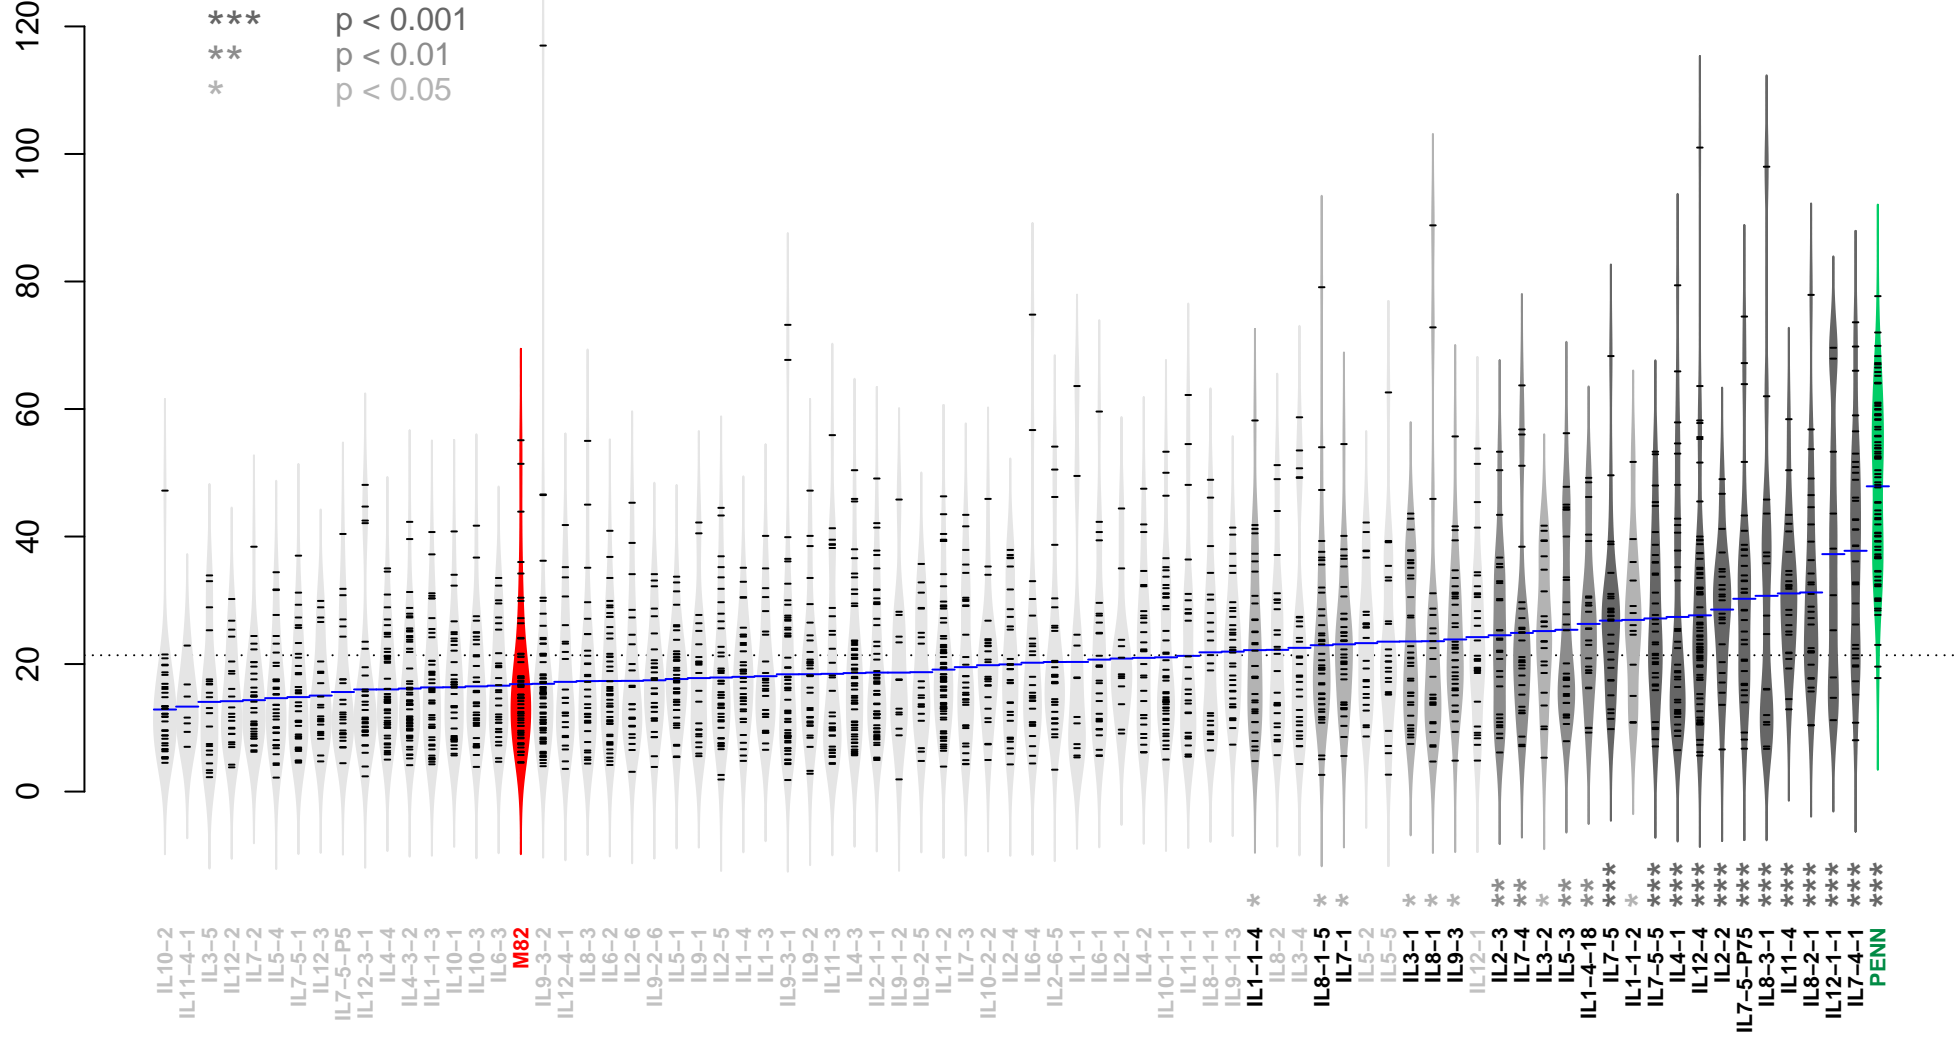

Average of absolute value of angle along first third root (degrees)

**first3rdAng: Average of absolute value of angle along first third root**

FDR  
\*\*\*  
\*\*  
\*

threshold  
p < 0.001  
p < 0.01  
p < 0.05

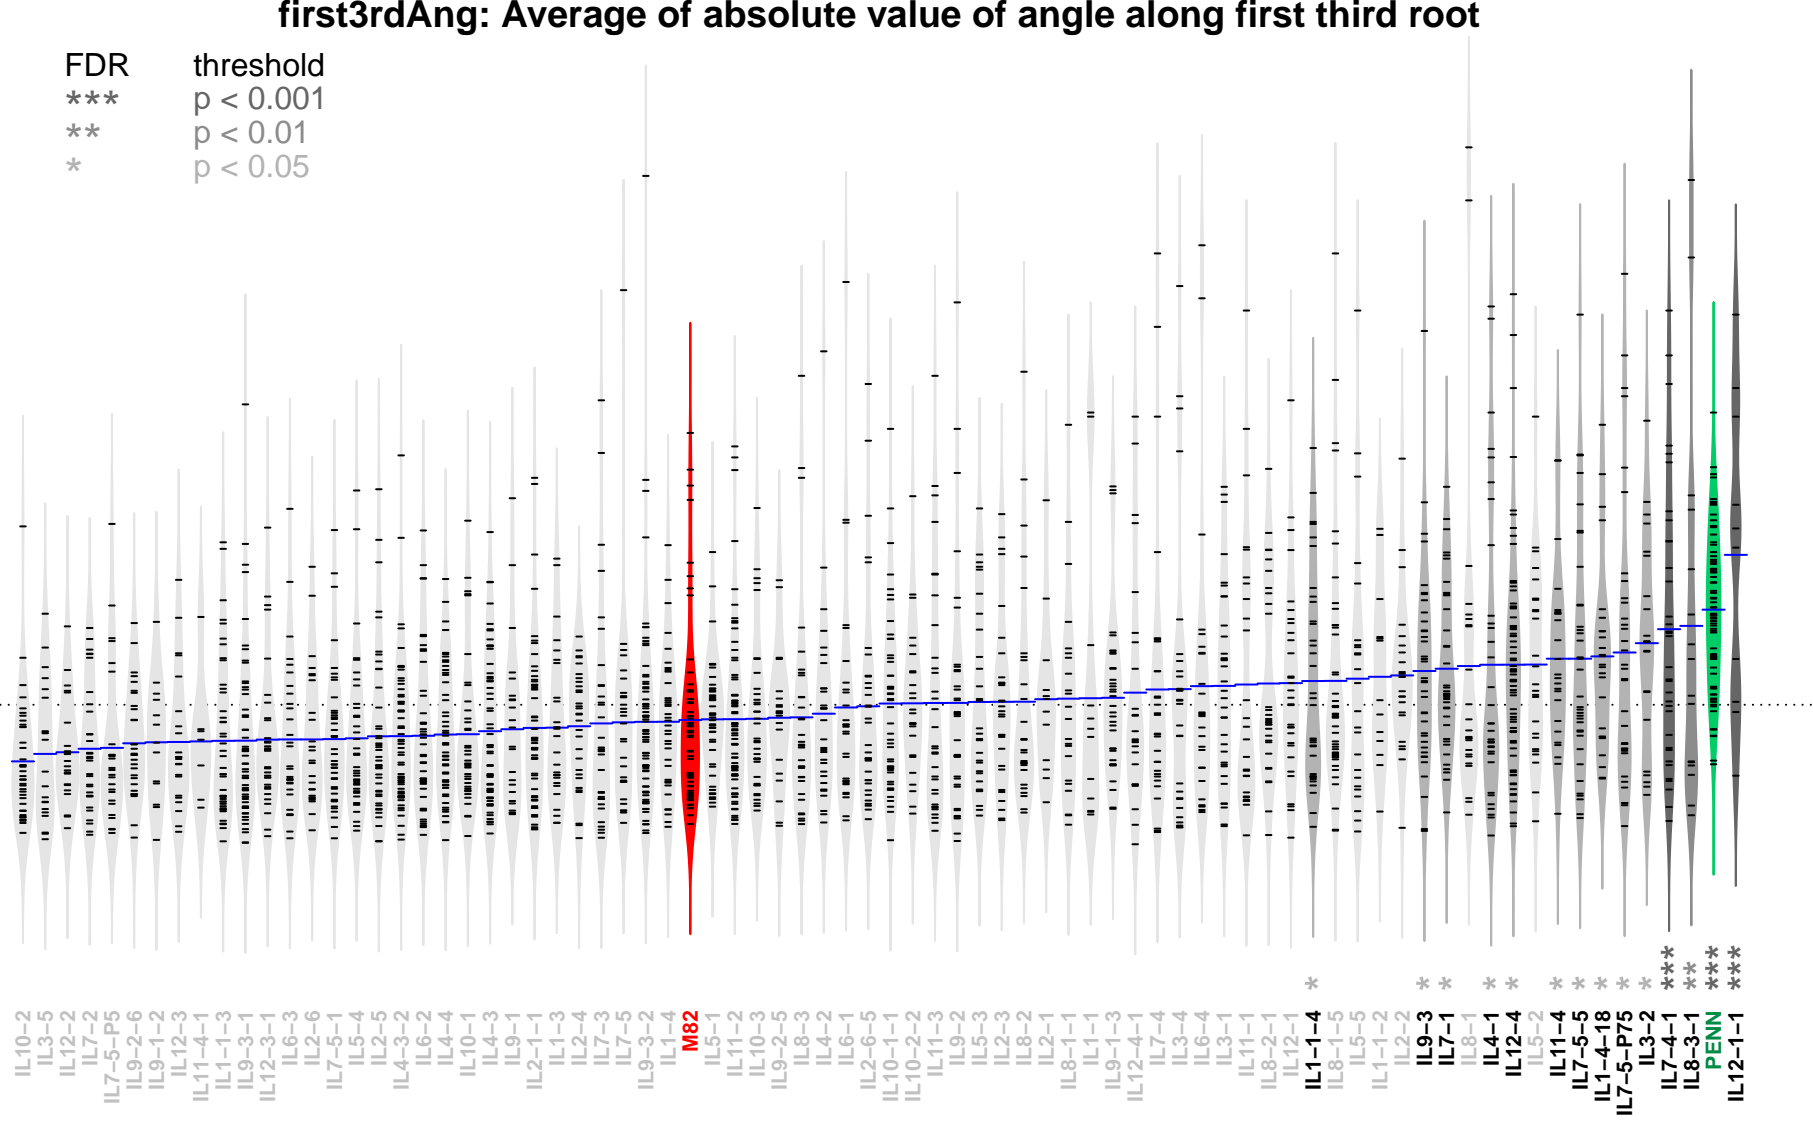

Average of absolute value of angle along middle third root (degrees)

mid3rdAng: Average of absolute value of angle along middle third root

FDR  
\*\*\*  
\*\*  
\*

threshold  
 $p < 0.001$   
 $p < 0.01$   
 $p < 0.05$

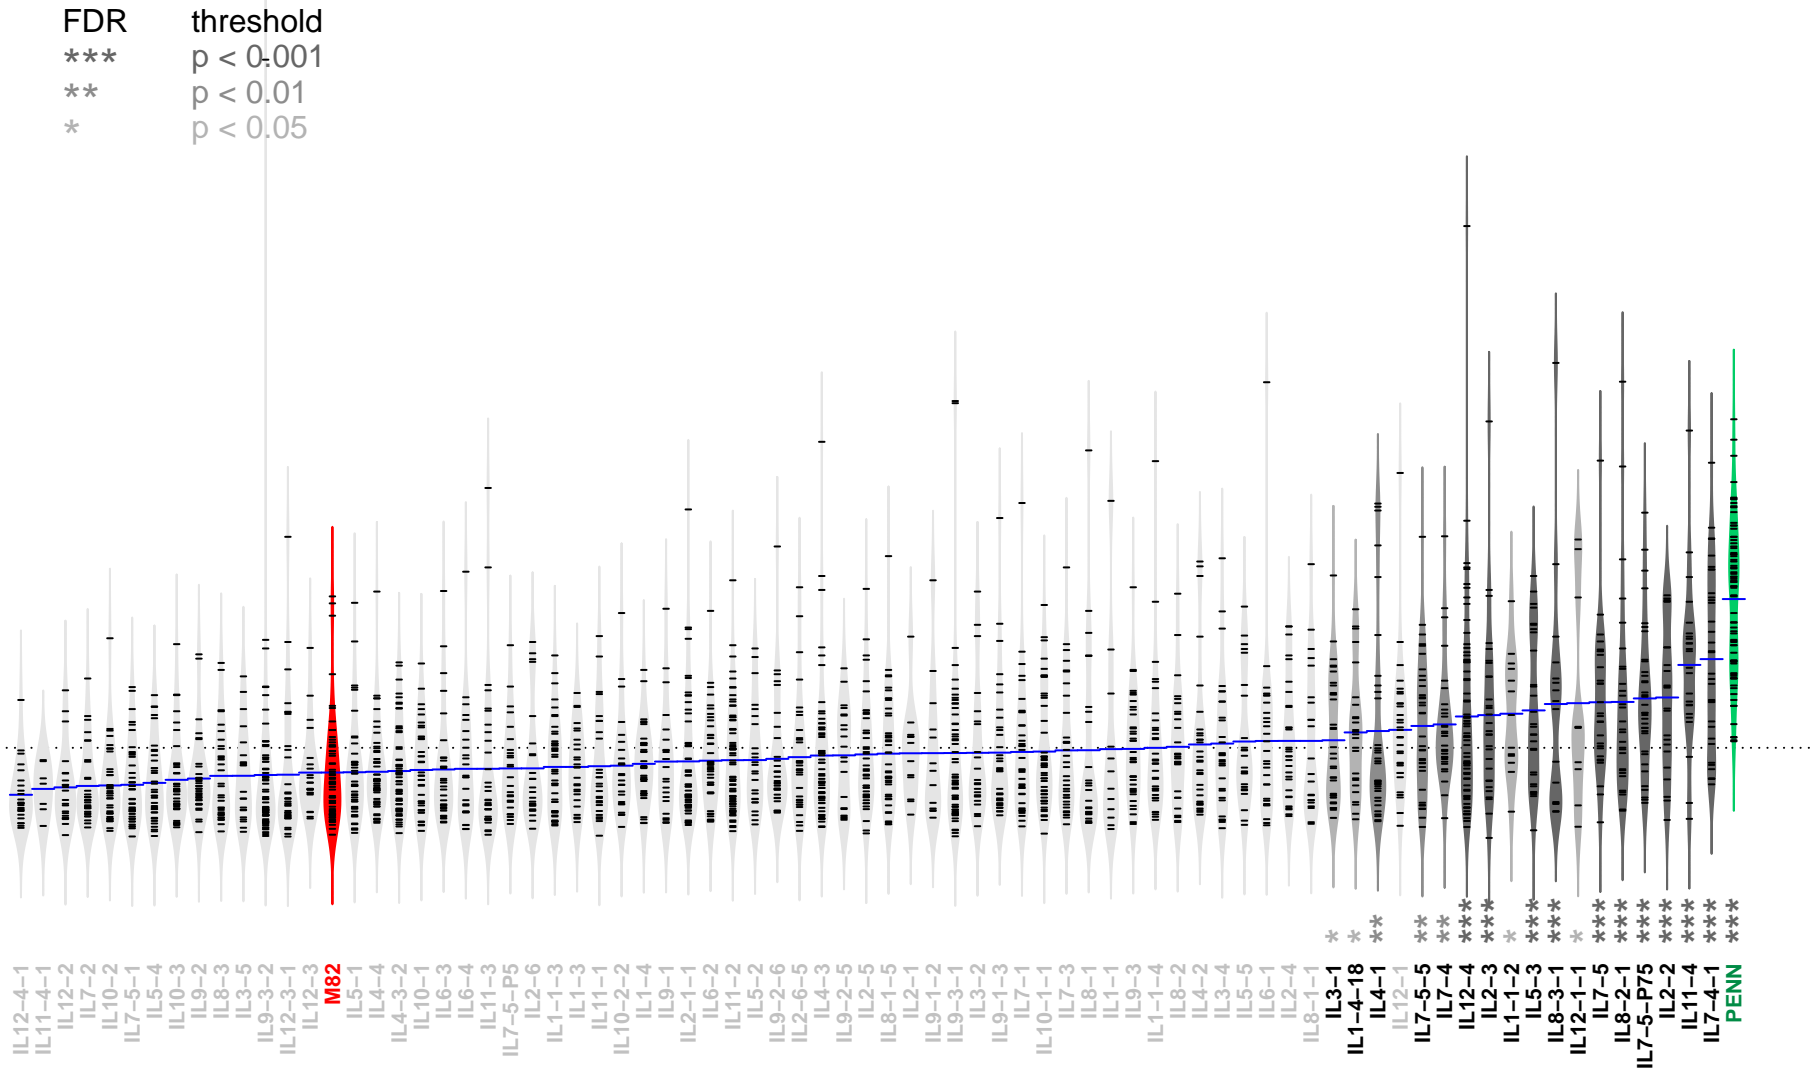

Average of absolute value of angle along last third root (degrees)

## last3rdAng: Average of absolute value of angle along last third root

FDR  
\*\*\*  
\*\*  
\*

threshold  
 $p < 0.001$   
 $p < 0.01$   
 $p < 0.05$

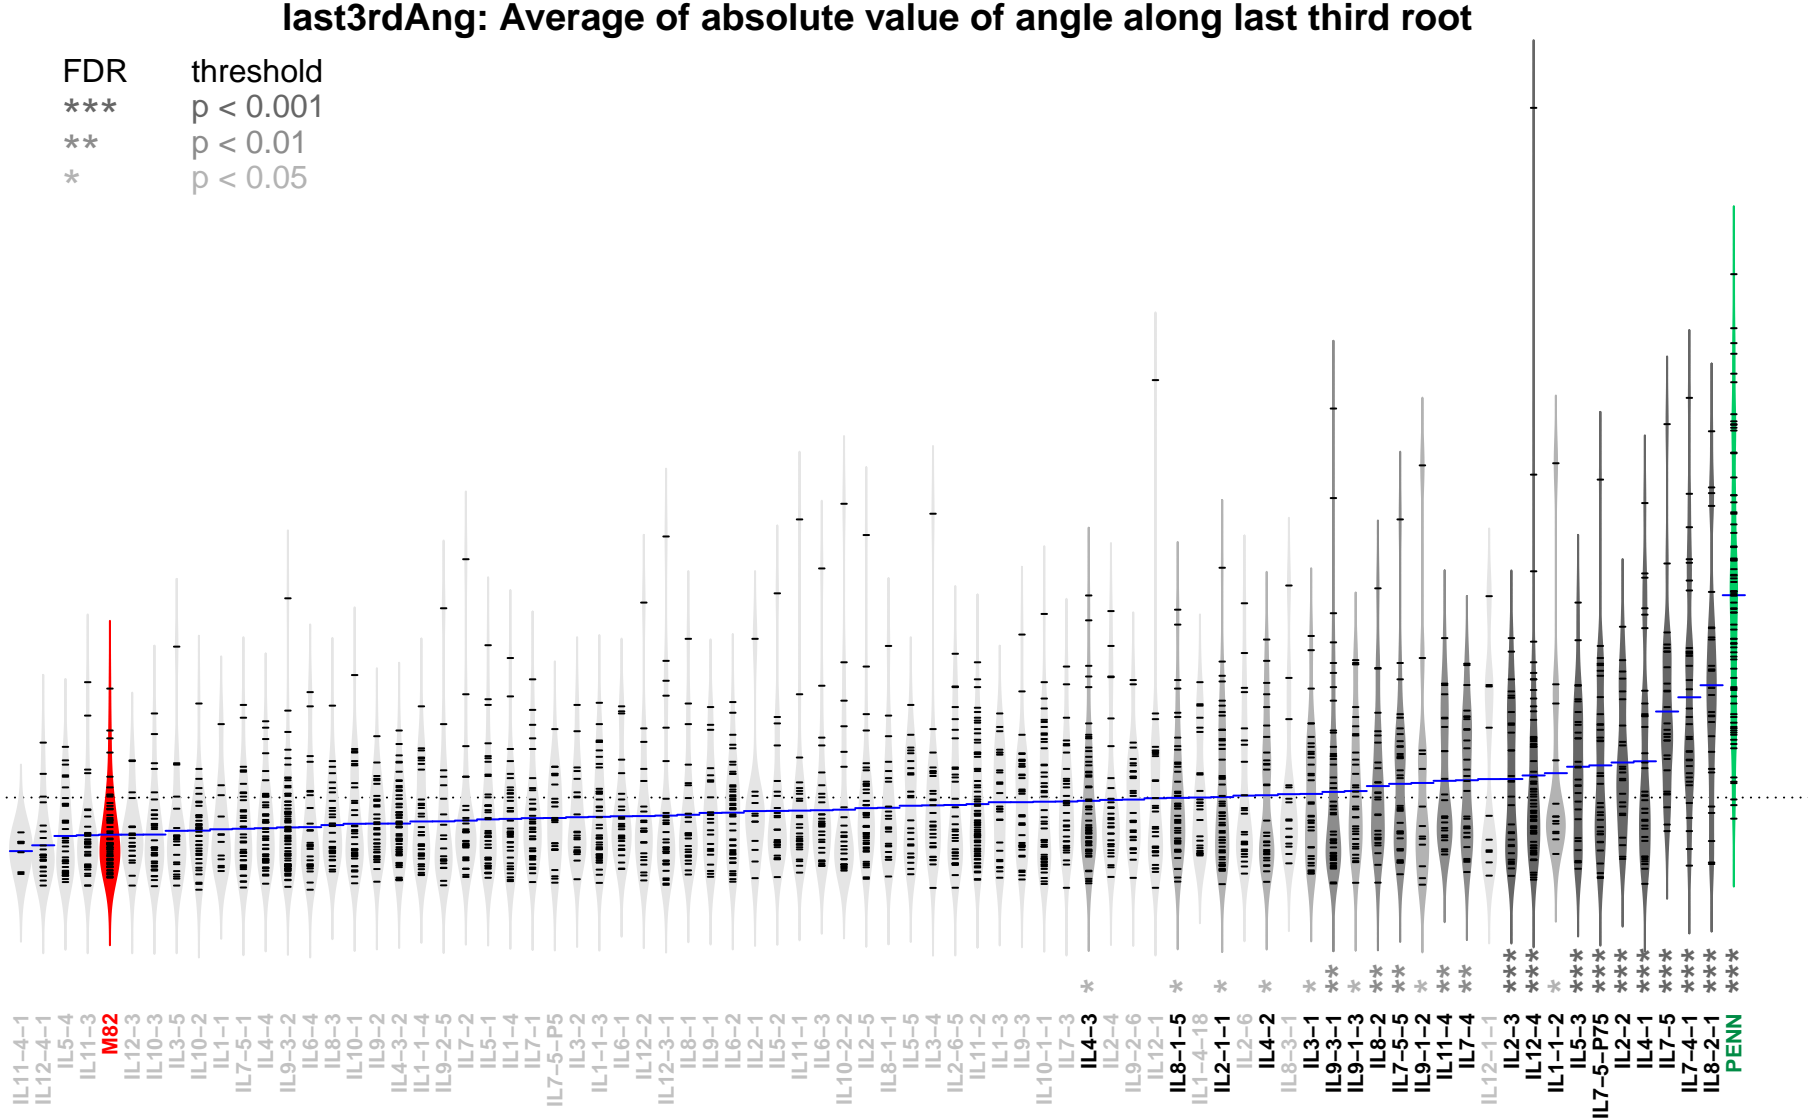

Supplement: Supplementary file 24 [file 2]
