# Supplementary material
Source: publisher figshare collection journal article supplement (https://gsajournals.figshare.com/articles/dataset/_/7237562)

# Angle Rate Thru T0

deg/225s

-4 -2 0 2 4

\*+ p < 0.05  
 +\*+\* p < 0.01  
 +++\*\* p < 0.001

Data filtering: >= 3 roots/IL

Bars = std. err. (sigma) from lm/glht

IL10-1-1  
 IL11-2  
 IL11-4-1  
 IL12-1  
 IL12-1-1  
 IL12-2  
 IL12-3  
 IL12-3-1  
 IL12-4  
 IL1-4  
 IL1-4-18  
 IL2-1  
 IL2-4  
 IL3-5  
 IL4-1  
 IL4-1-1  
 IL4-3  
 IL4-3-2  
 IL4-4  
 IL5-1  
 IL5-2  
 IL5-3  
 IL5-5  
 IL6-1  
 IL6-2  
 IL7-1  
 IL7-4  
 IL7-5  
 IL7-5-1  
 IL7-5-5  
 IL8-1  
 IL8-1-1  
 IL8-1-5  
 IL8-3  
 IL9-1  
 IL9-1-2  
 IL9-2  
 IL9-3-1  
 M82  
 IL7-5-P5  
 PENN

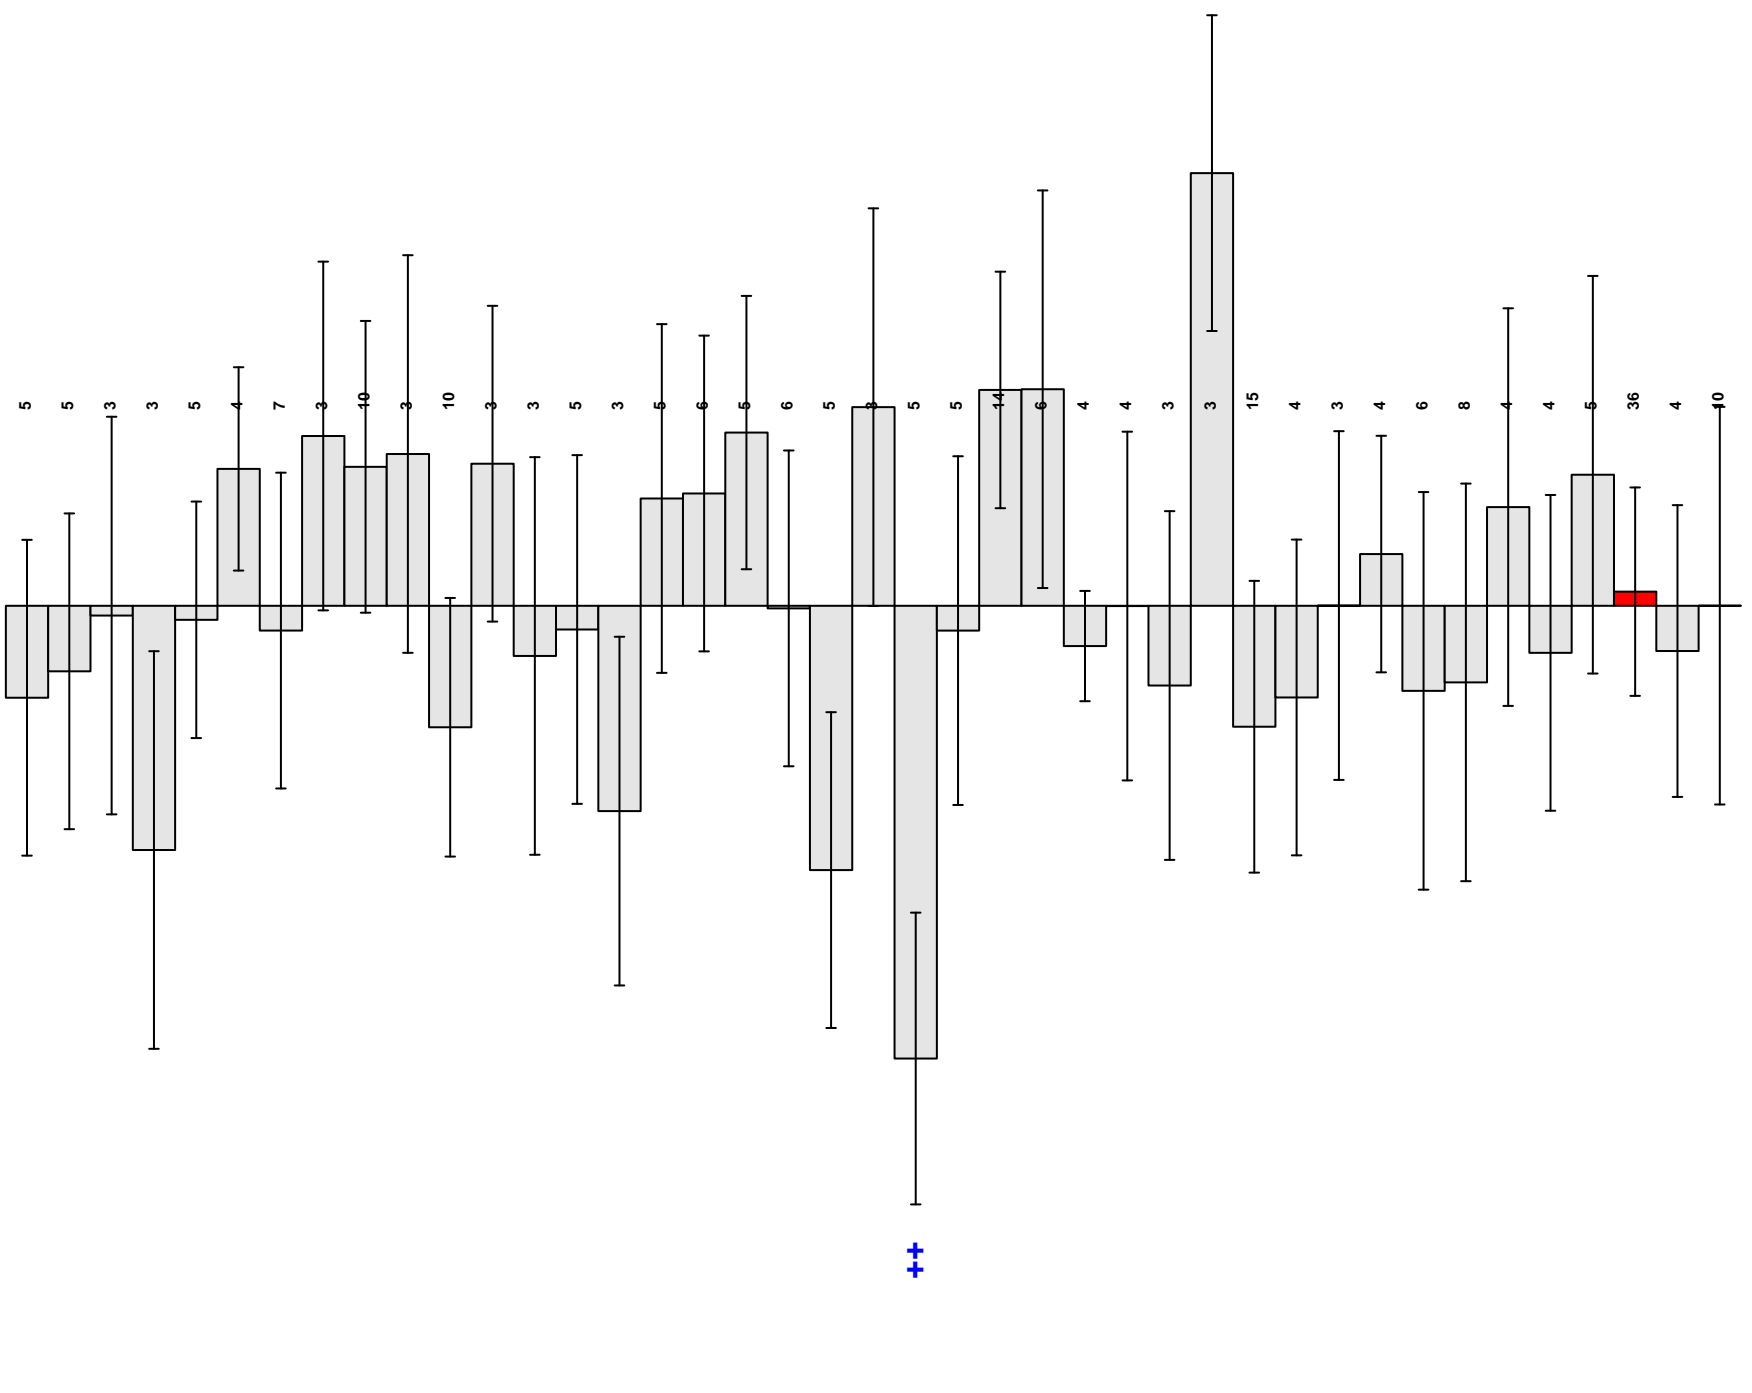

# Angle Rate Thru T1

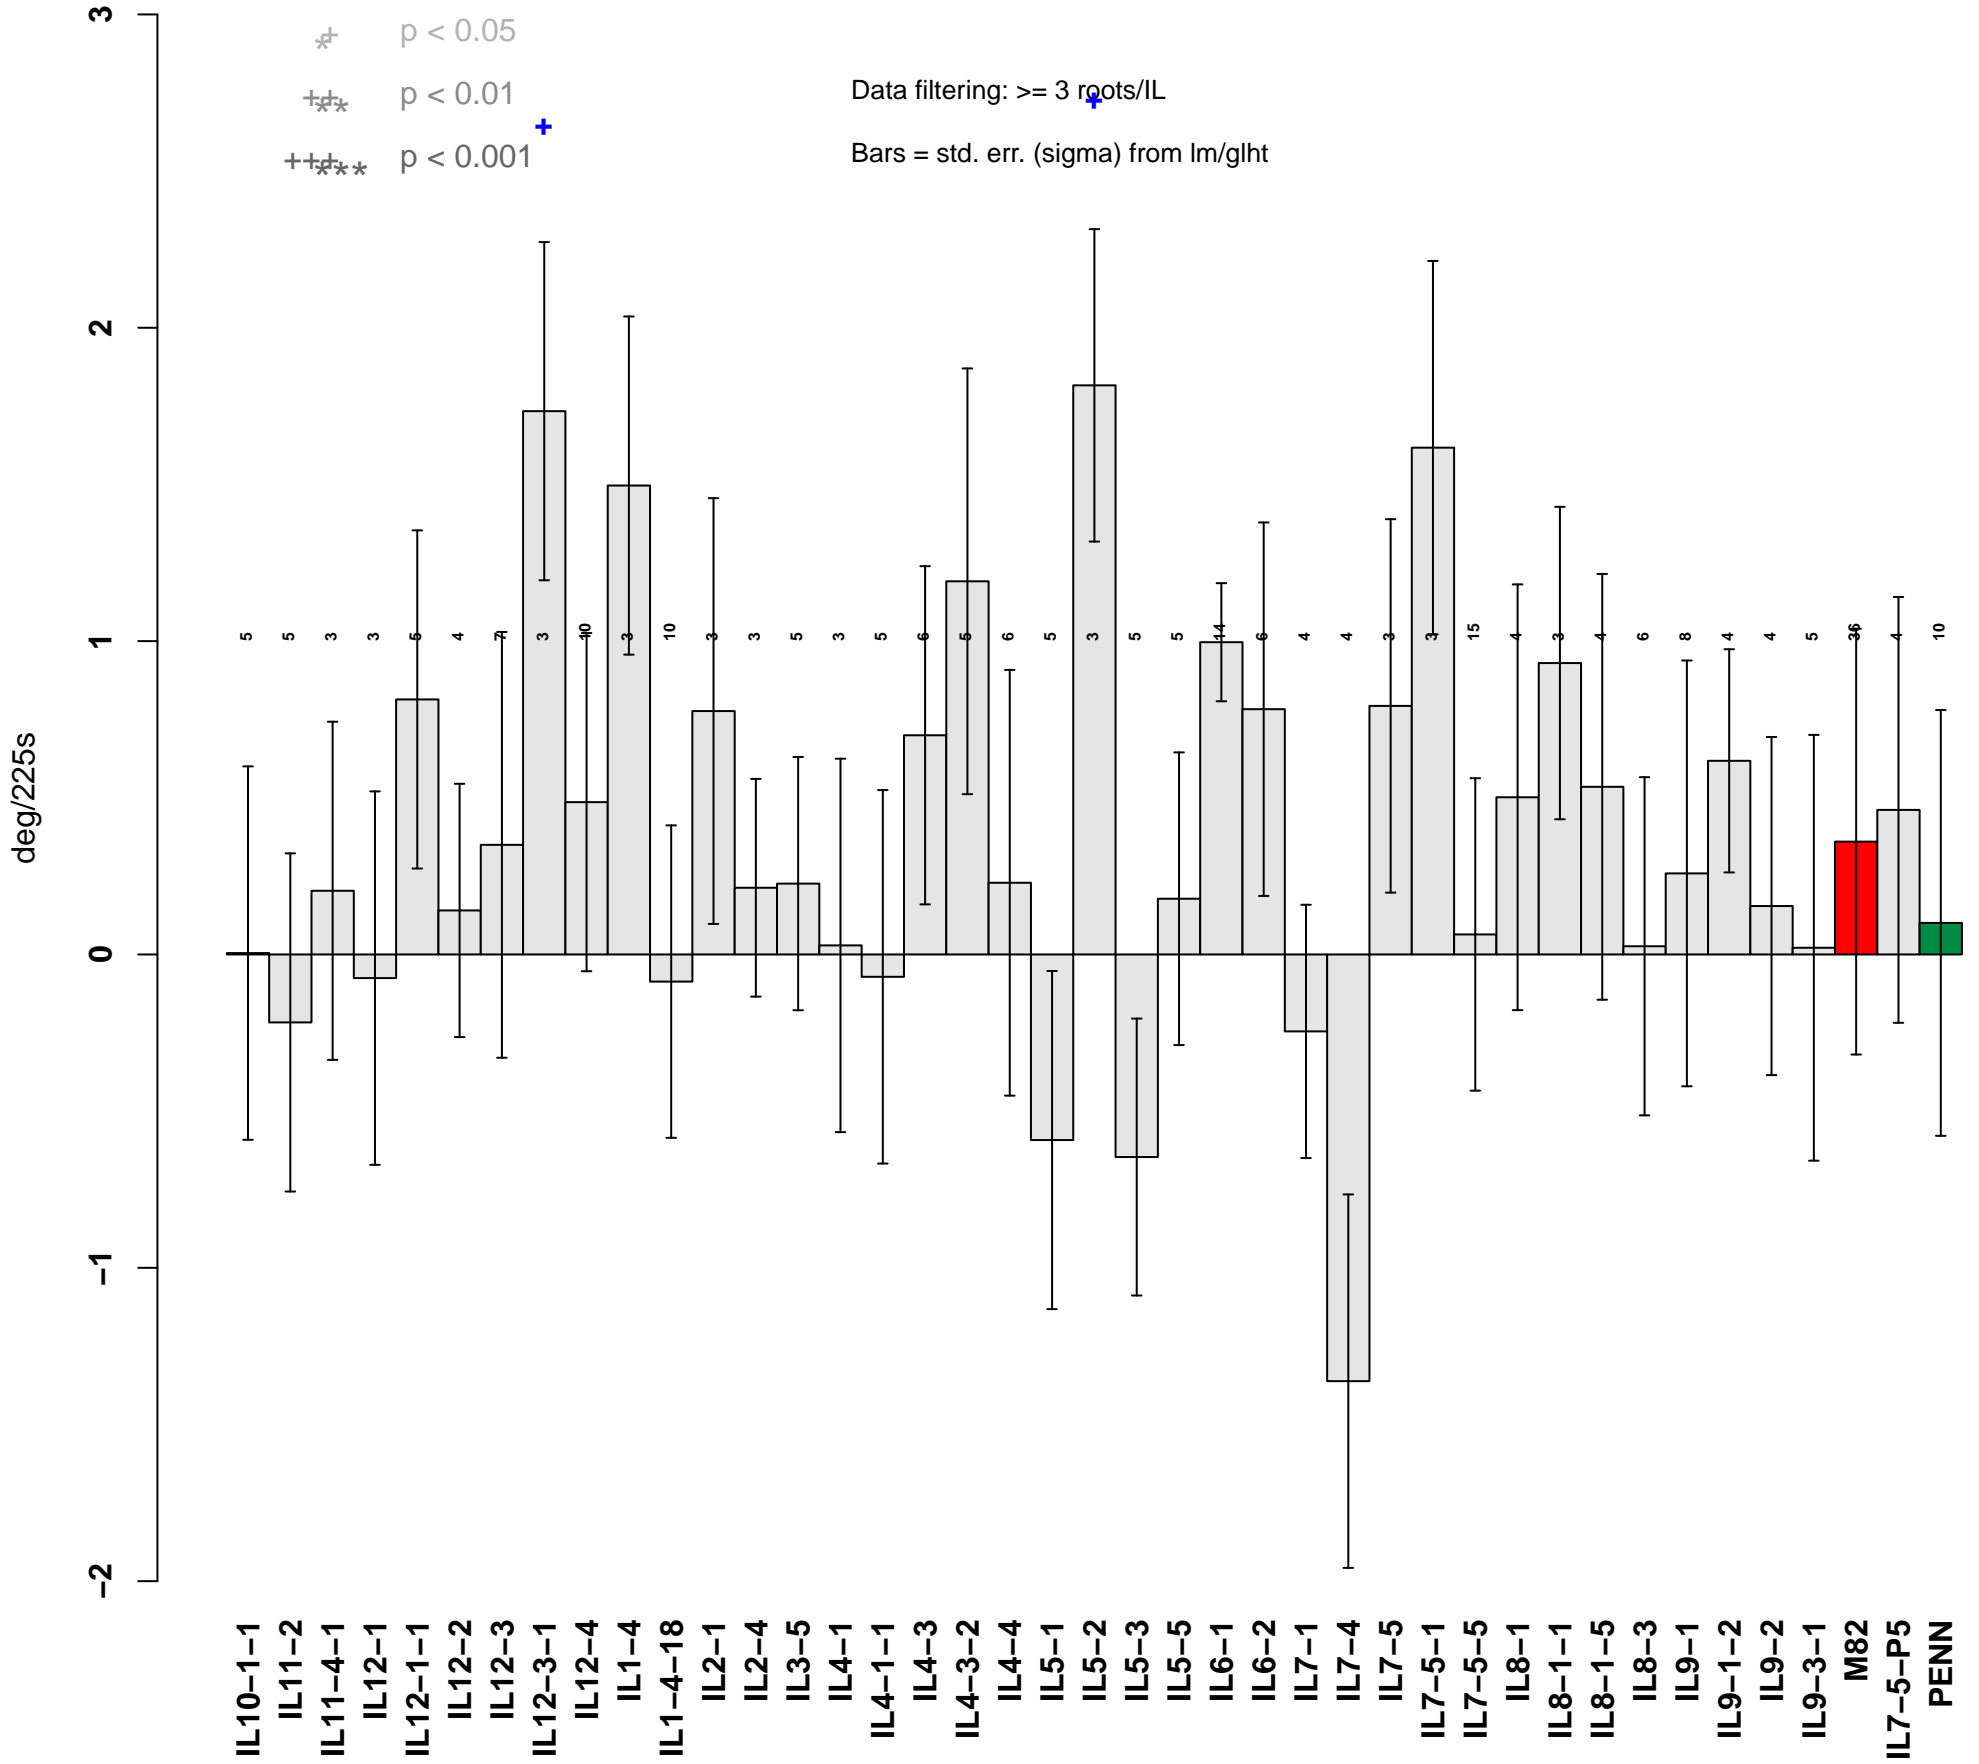

# Angle Rate Thru T2

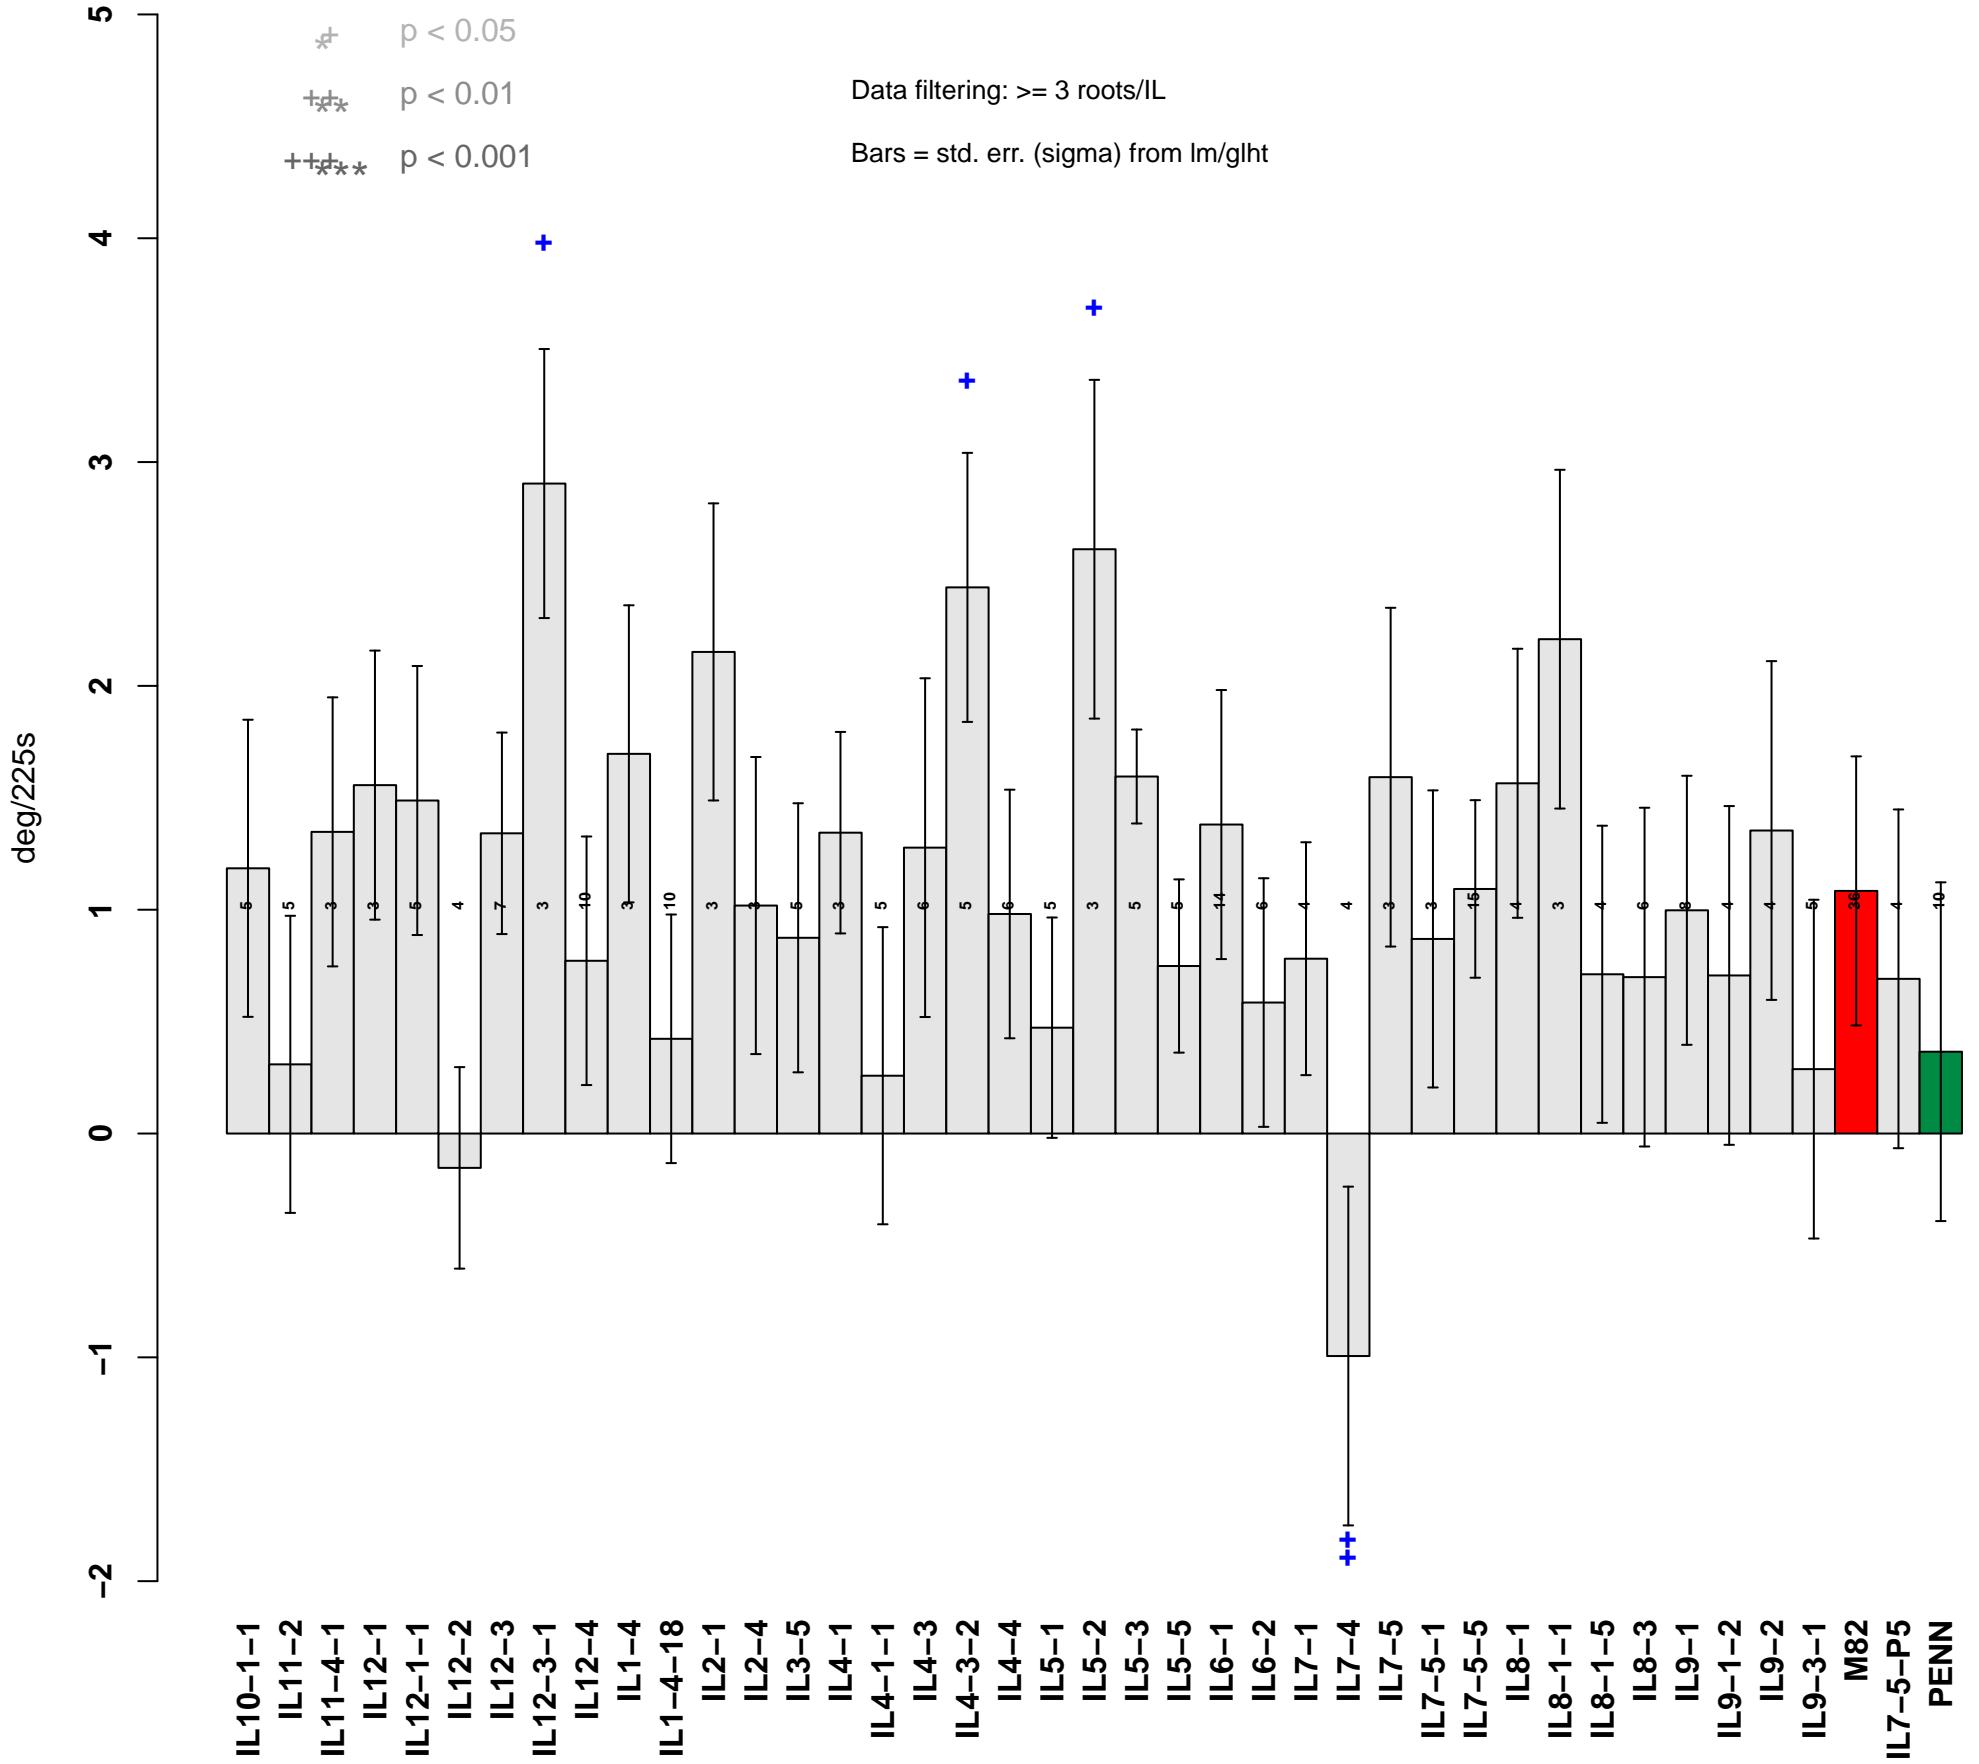

# Angle Rate Thru T3

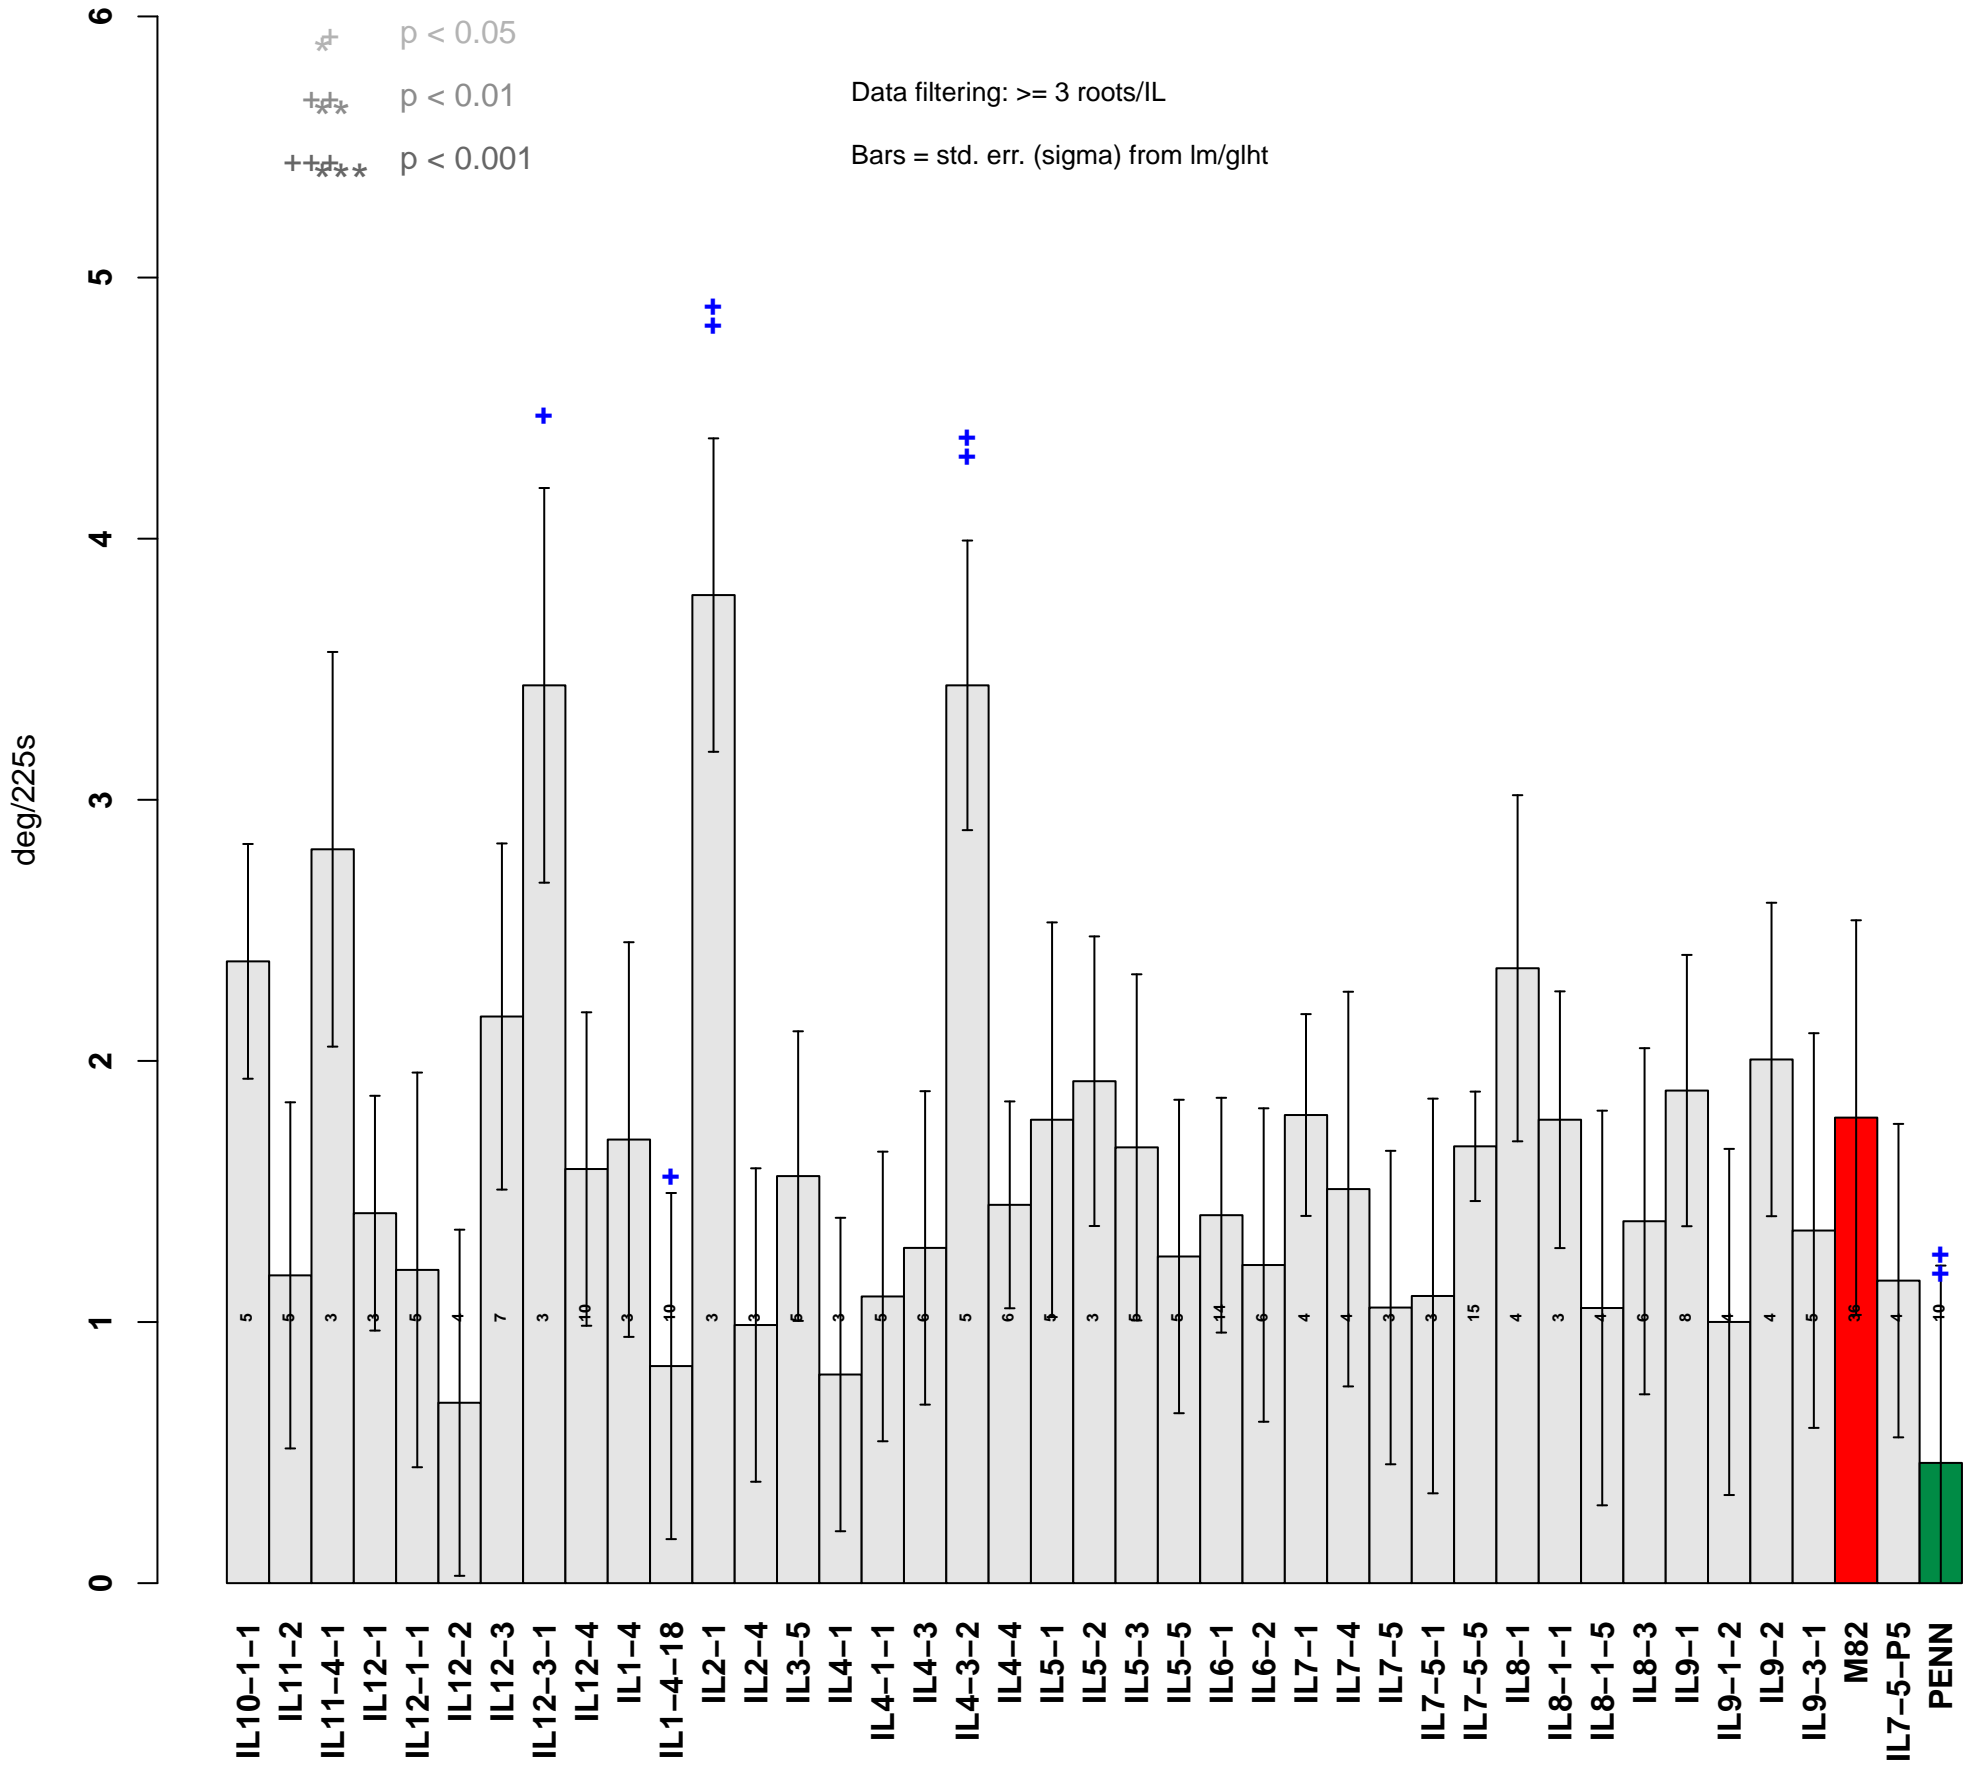

# Angle Rate Thru T4

deg/225s

6  
5  
4  
3  
2  
1  
0

\*  $p < 0.05$   
 +\*  $p < 0.01$   
 ++\*  $p < 0.001$

Data filtering:  $\geq 3$  roots/IL

Bars = std. err. (sigma) from lm/glht

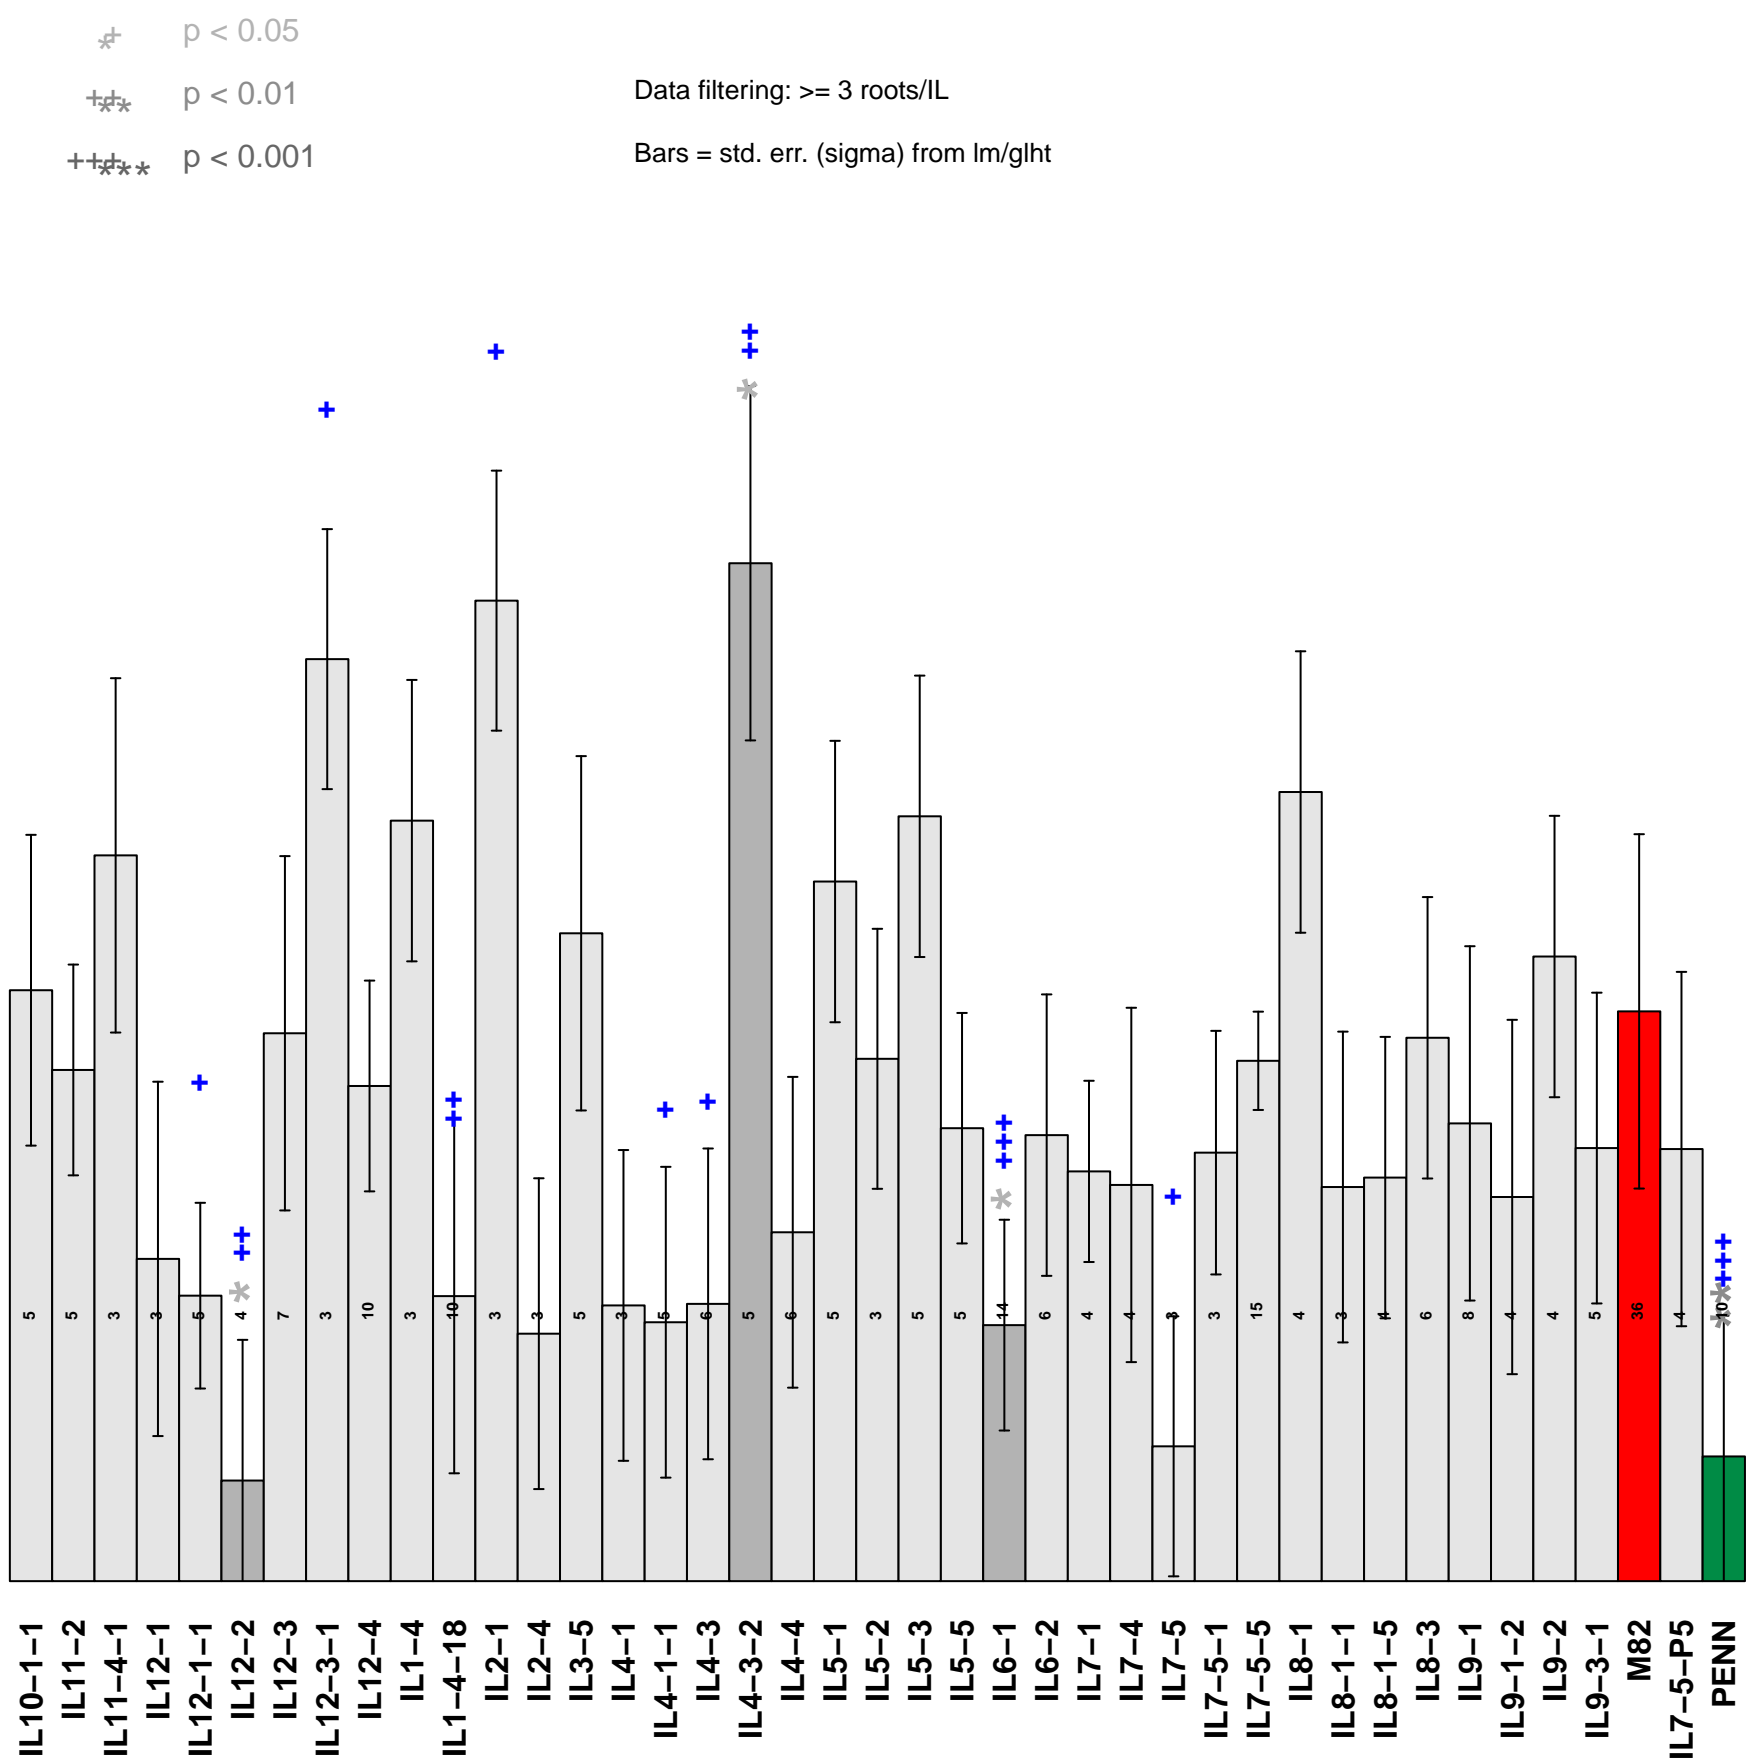

# Angle Rate Thru T5

deg/225s

6  
5  
4  
3  
2  
1  
0

\* p < 0.05  
+\* p < 0.01  
++\* p < 0.001

Data filtering: >= 3 roots/IL

Bars = std. err. (sigma) from lm/glht

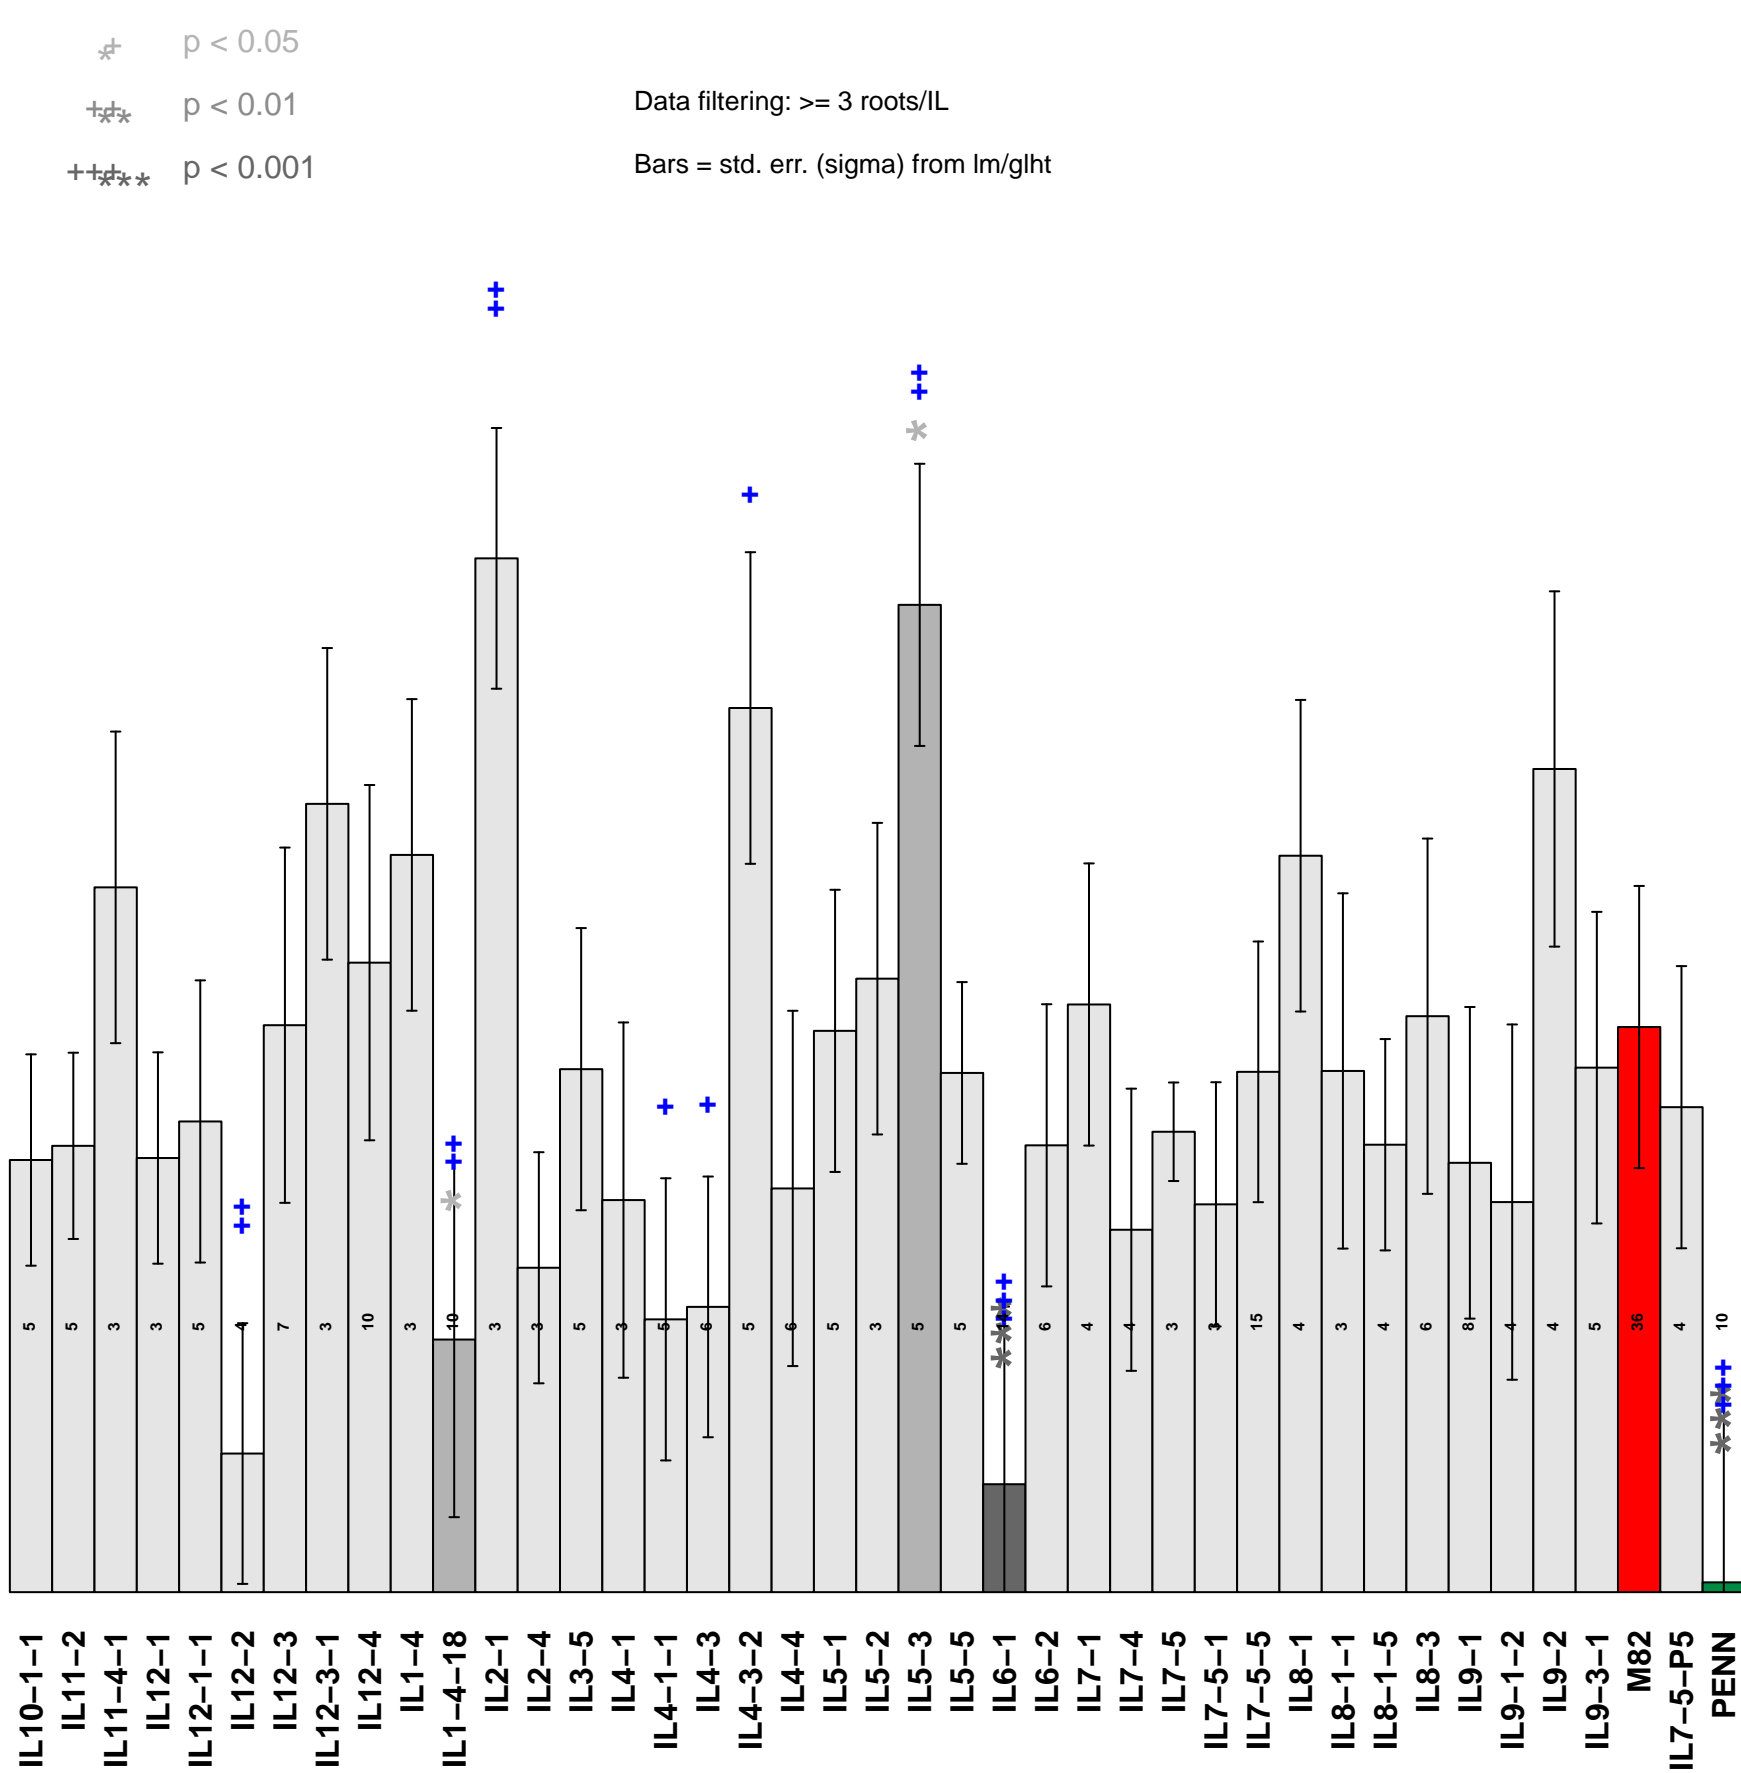

# Angle Rate Thru T6

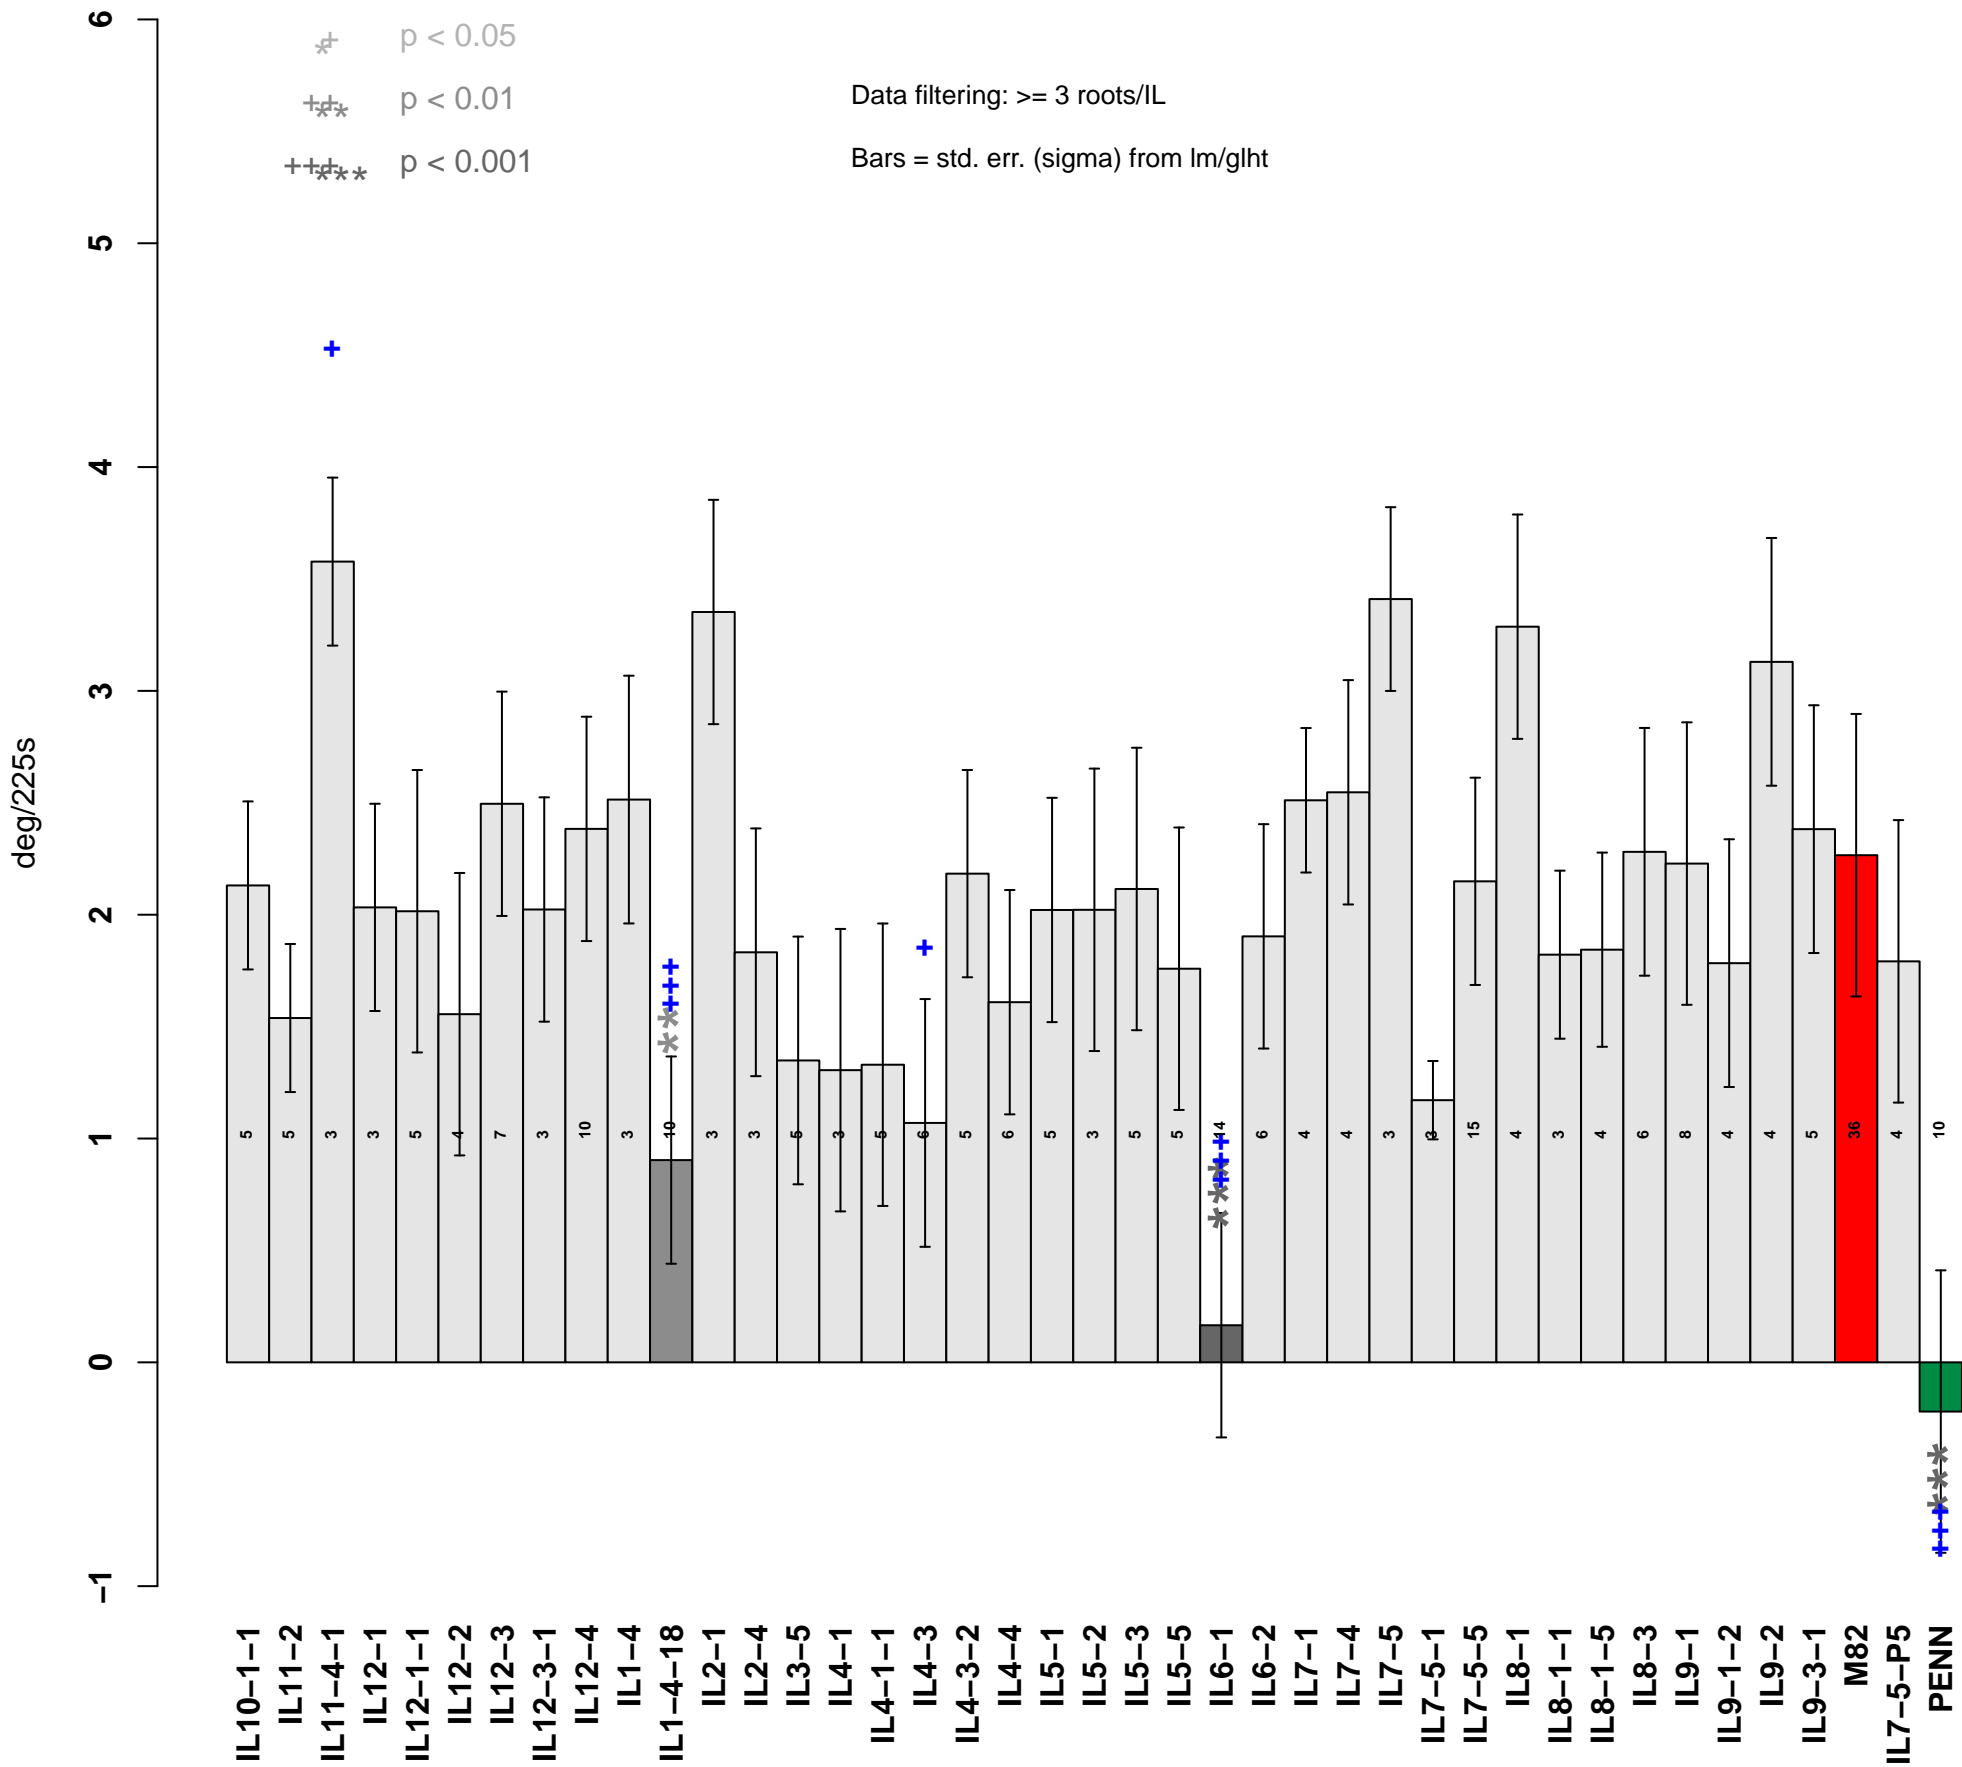

# Angle Rate Thru T7

deg/225s

6  
5  
4  
3  
2  
1  
0

\*  $p < 0.05$   
 +\*  $p < 0.01$   
 ++\*  $p < 0.001$

Data filtering:  $\geq 3$  roots/IL

Bars = std. err. (sigma) from lm/glht

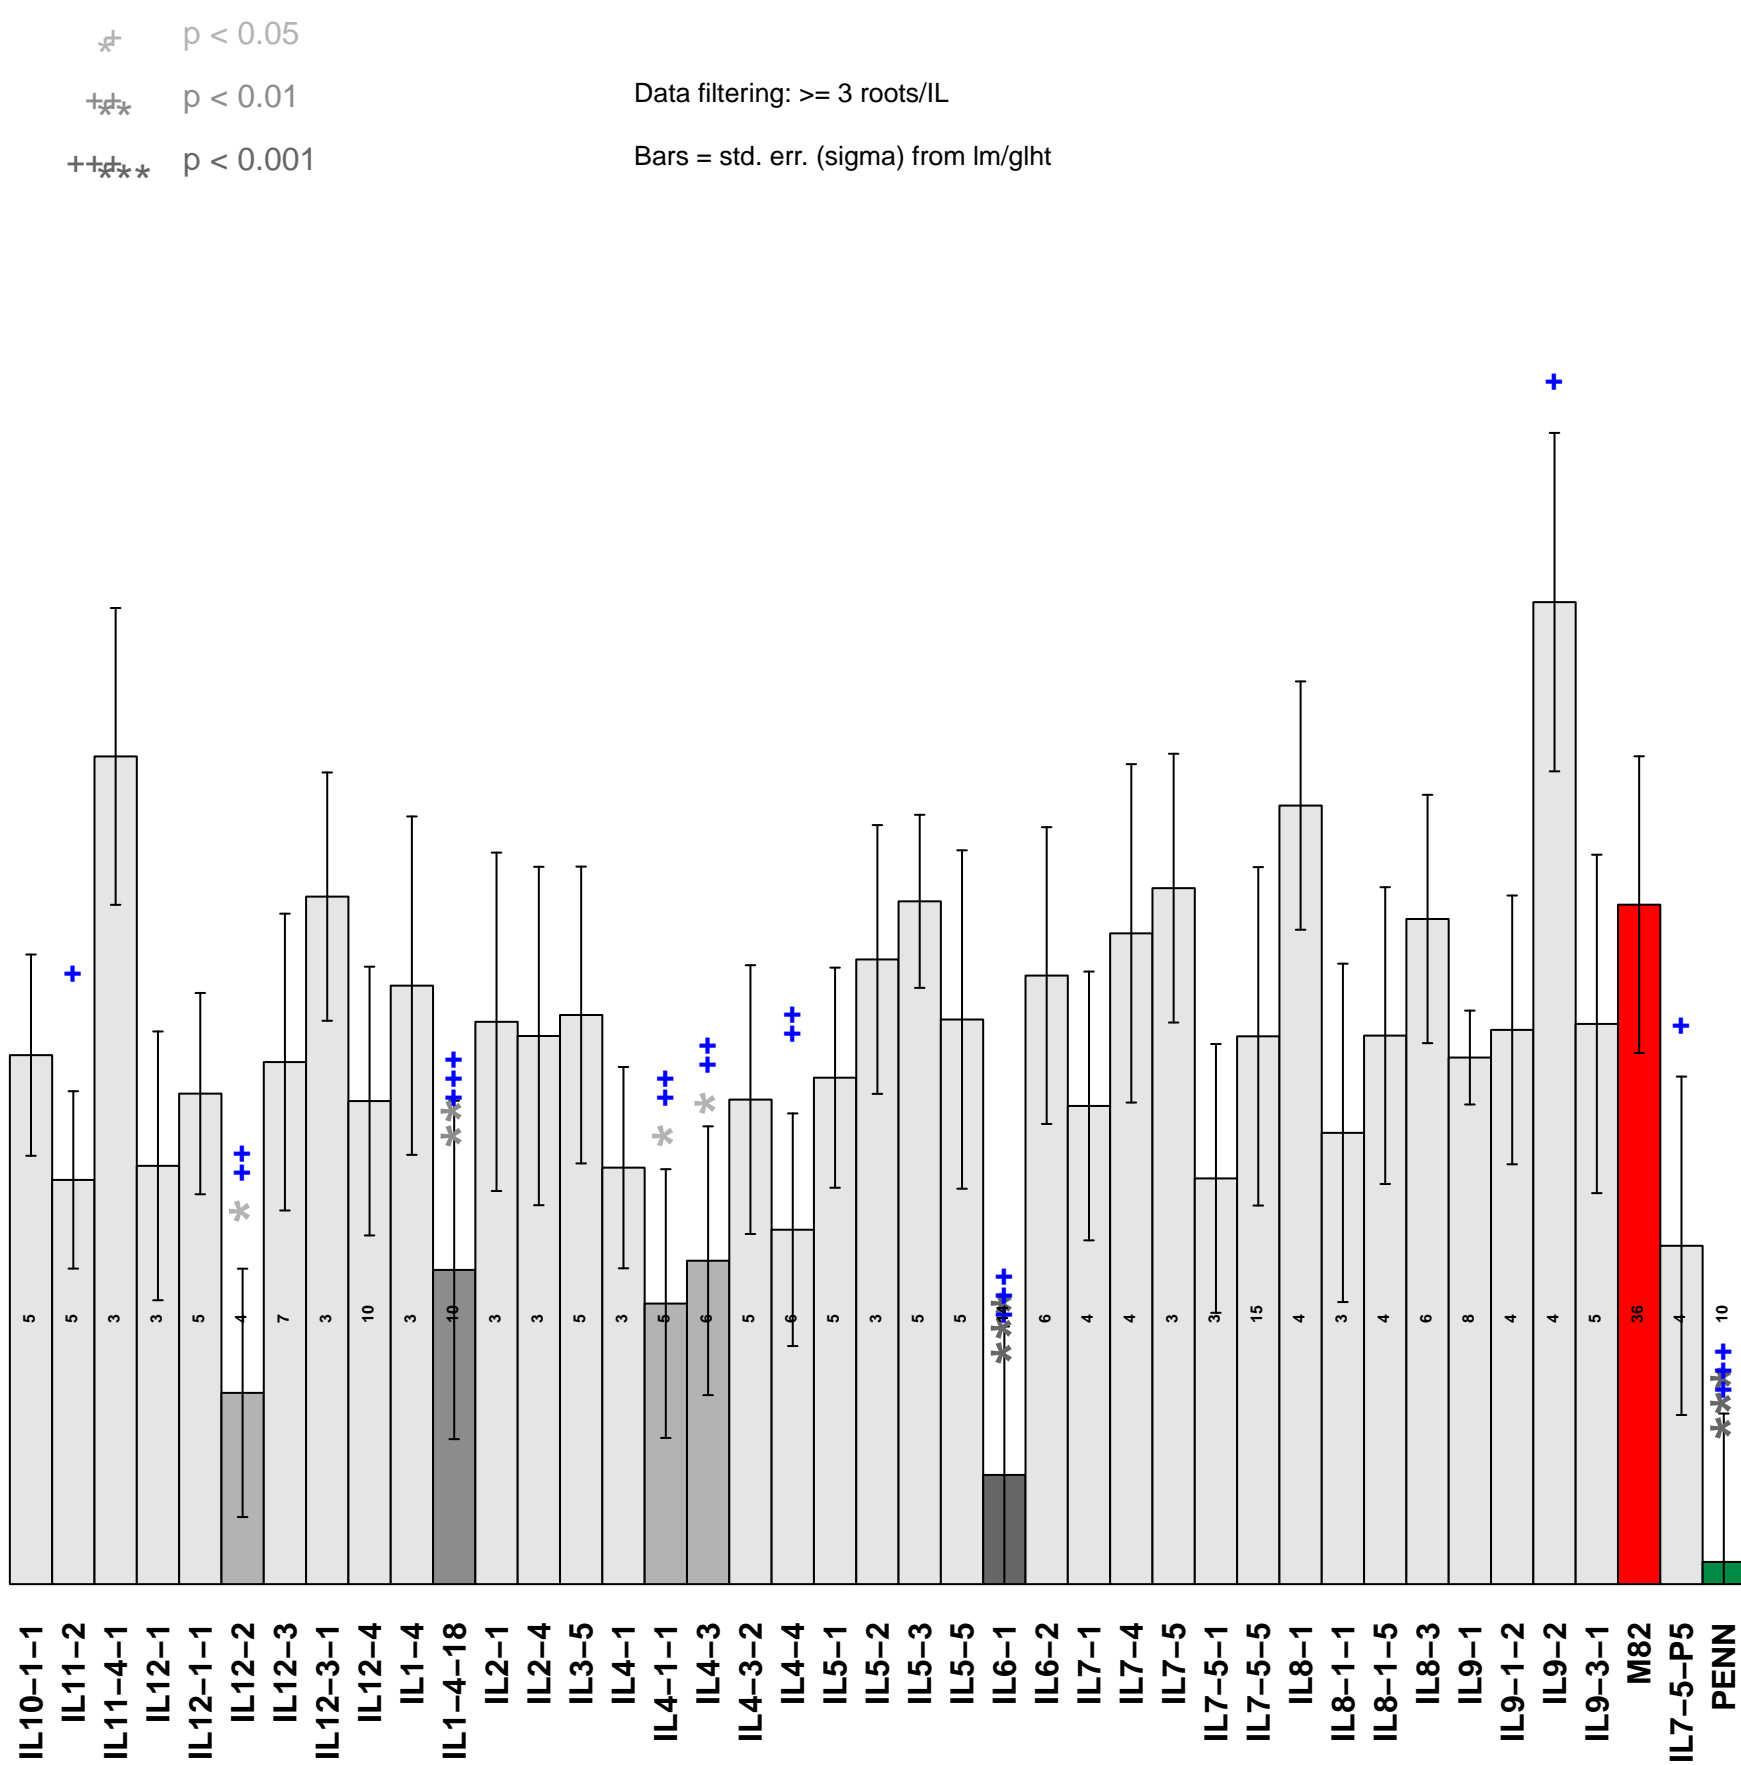

# Angle Rate Thru T8

deg/225s

5  
4  
3  
2  
1  
0

\*+ p < 0.05  
+\*+ p < 0.01  
++\*+ p < 0.001

Data filtering: >= 3 roots/IL

Bars = std. err. (sigma) from lm/glht

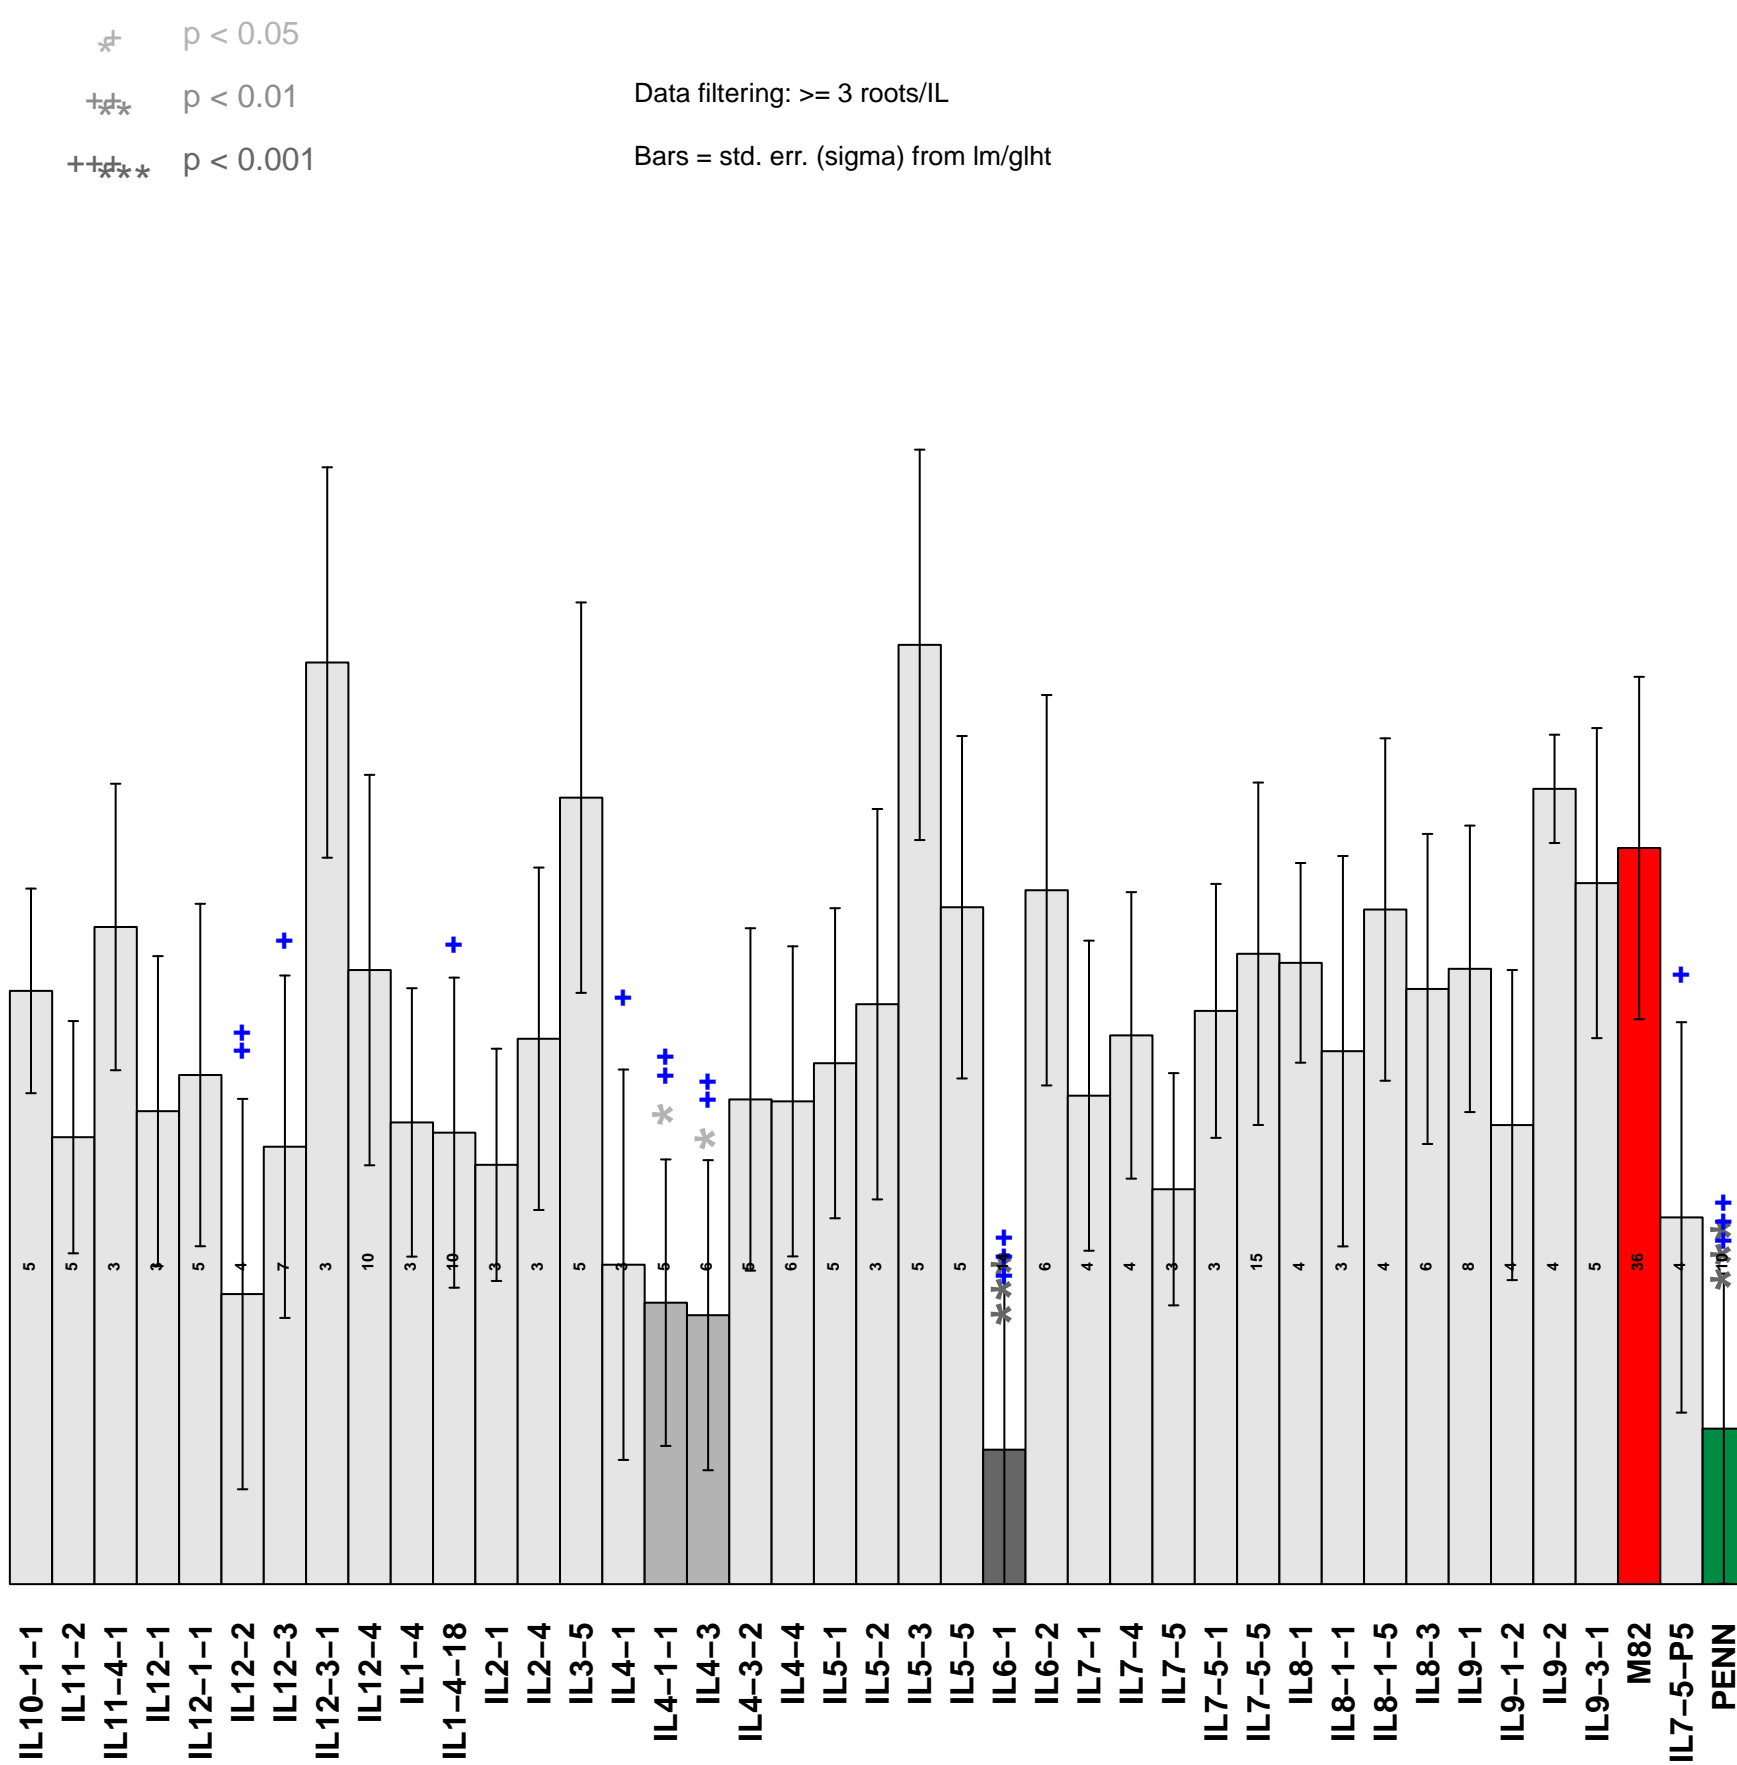

# Angle Rate Thru T9

deg/225s

4  
3  
2  
1  
0

\*† p < 0.05  
+\*† p < 0.01  
++†\*†\* p < 0.001

Data filtering: >= 3 roots/IL

Bars = std. err. (sigma) from lm/glht

IL10-1-1  
IL11-2  
IL11-4-1  
IL12-1  
IL12-1-1  
IL12-2  
IL12-3  
IL12-3-1  
IL12-4  
IL1-4  
IL1-4-18  
IL2-1  
IL2-4  
IL3-5  
IL4-1  
IL4-1-1  
IL4-3  
IL4-3-2  
IL4-4  
IL5-1  
IL5-2  
IL5-3  
IL5-5  
IL6-1  
IL6-2  
IL7-1  
IL7-4  
IL7-5  
IL7-5-1  
IL7-5-5  
IL8-1  
IL8-1-1  
IL8-1-5  
IL8-3  
IL9-1  
IL9-1-2  
IL9-2  
IL9-3-1  
M82  
IL7-5-P5  
PENN

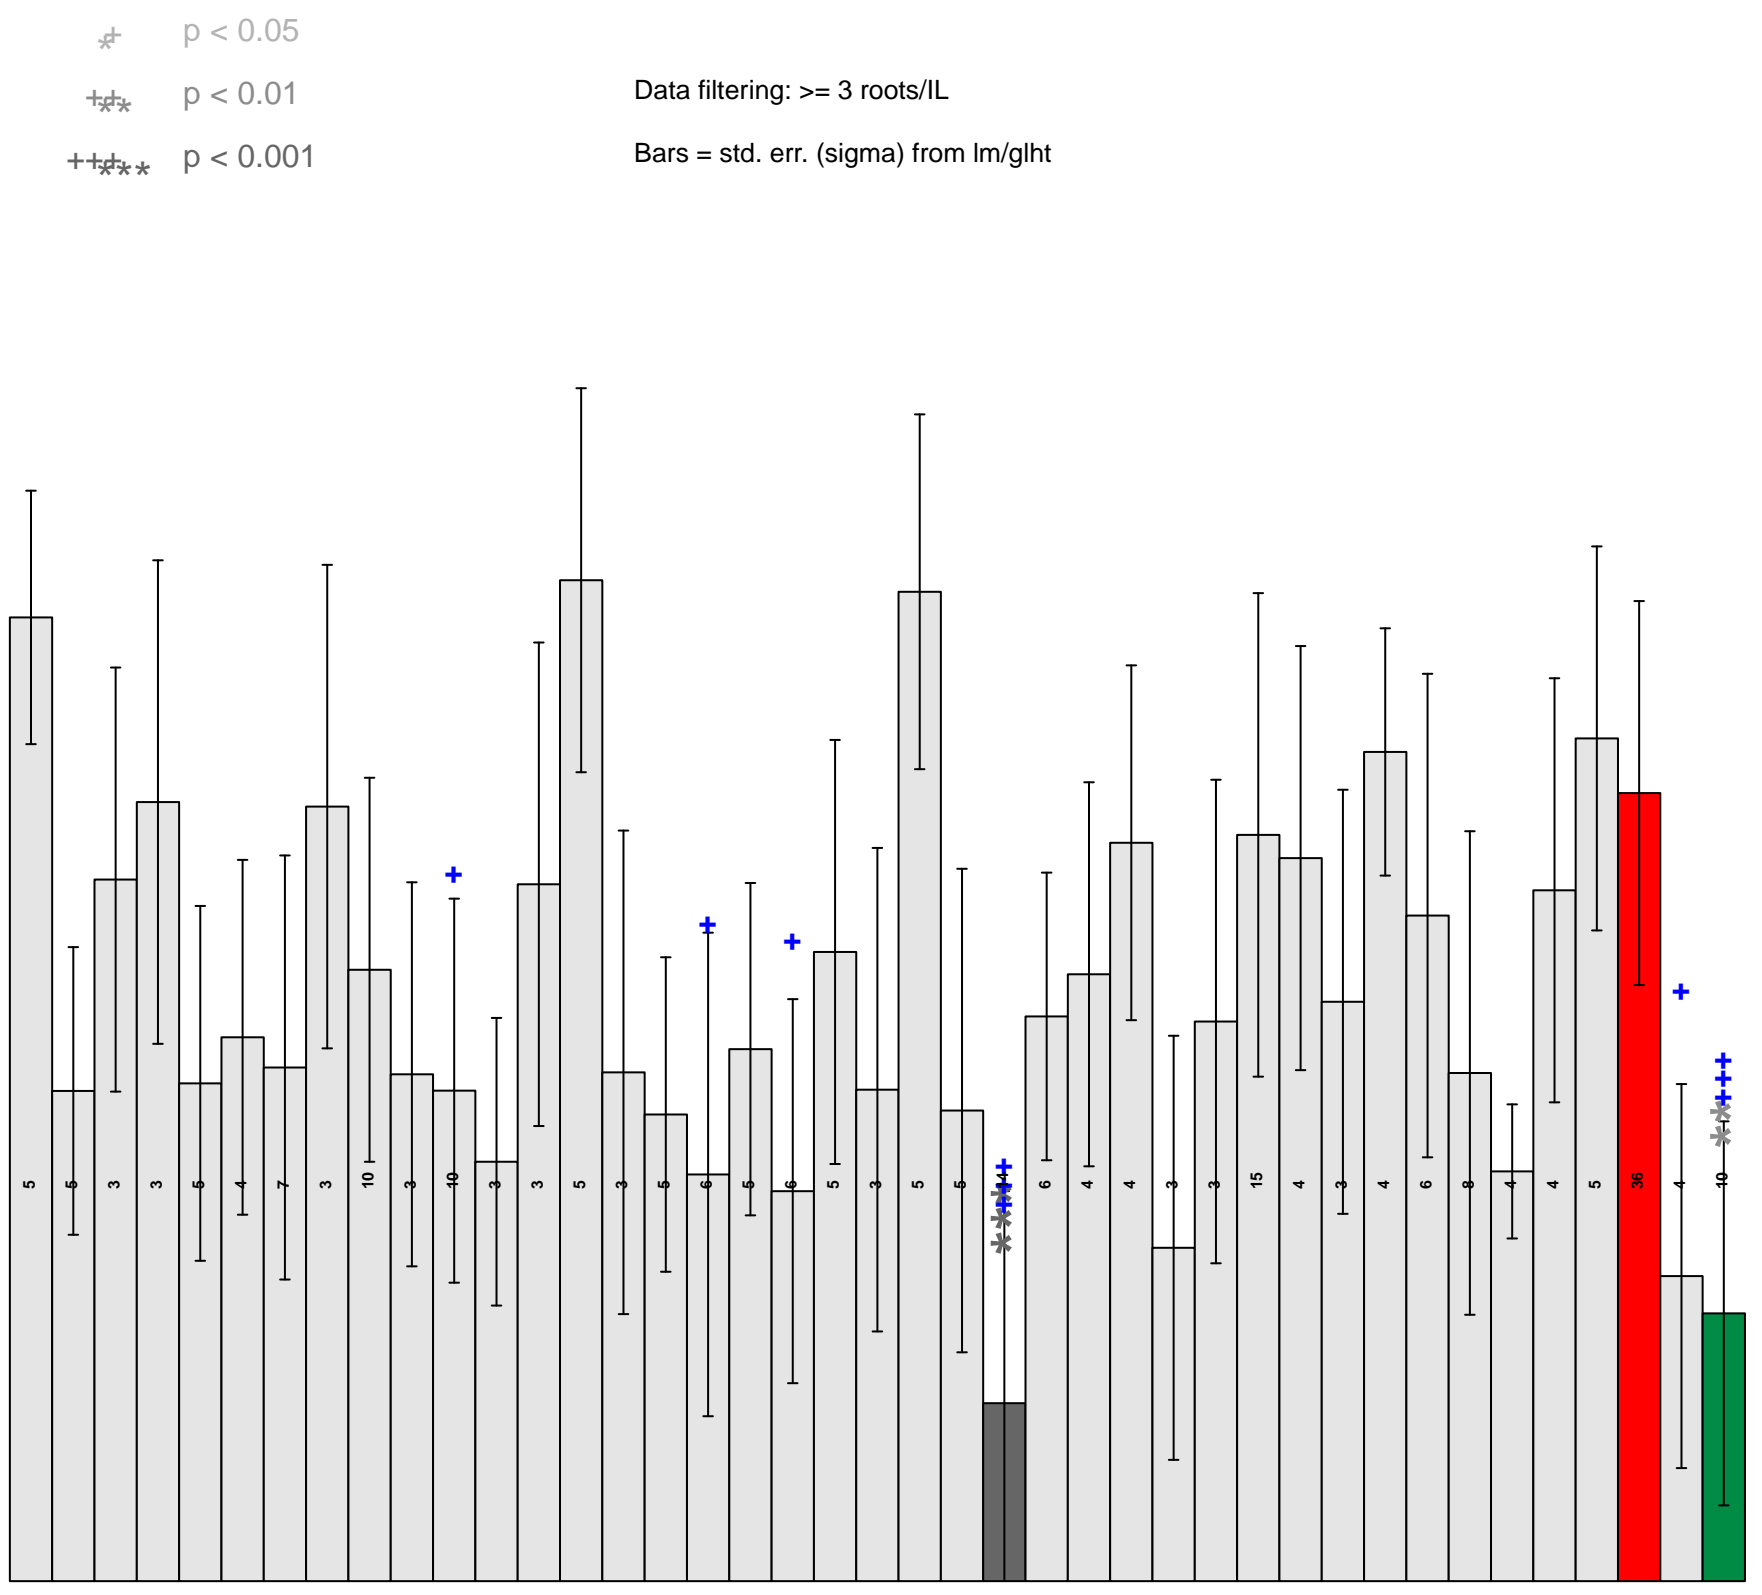

### Angle Rate Thru T10

\* $\dagger$   $p < 0.05$   
 $\dagger$ \* $\dagger$ \*  $p < 0.01$   
 $\dagger$ \* $\dagger$ \* $\dagger$ \*  $p < 0.001$

Data filtering:  $\geq 3$  roots/IL

Bars = std. err. (sigma) from lm/glht

deg/225s

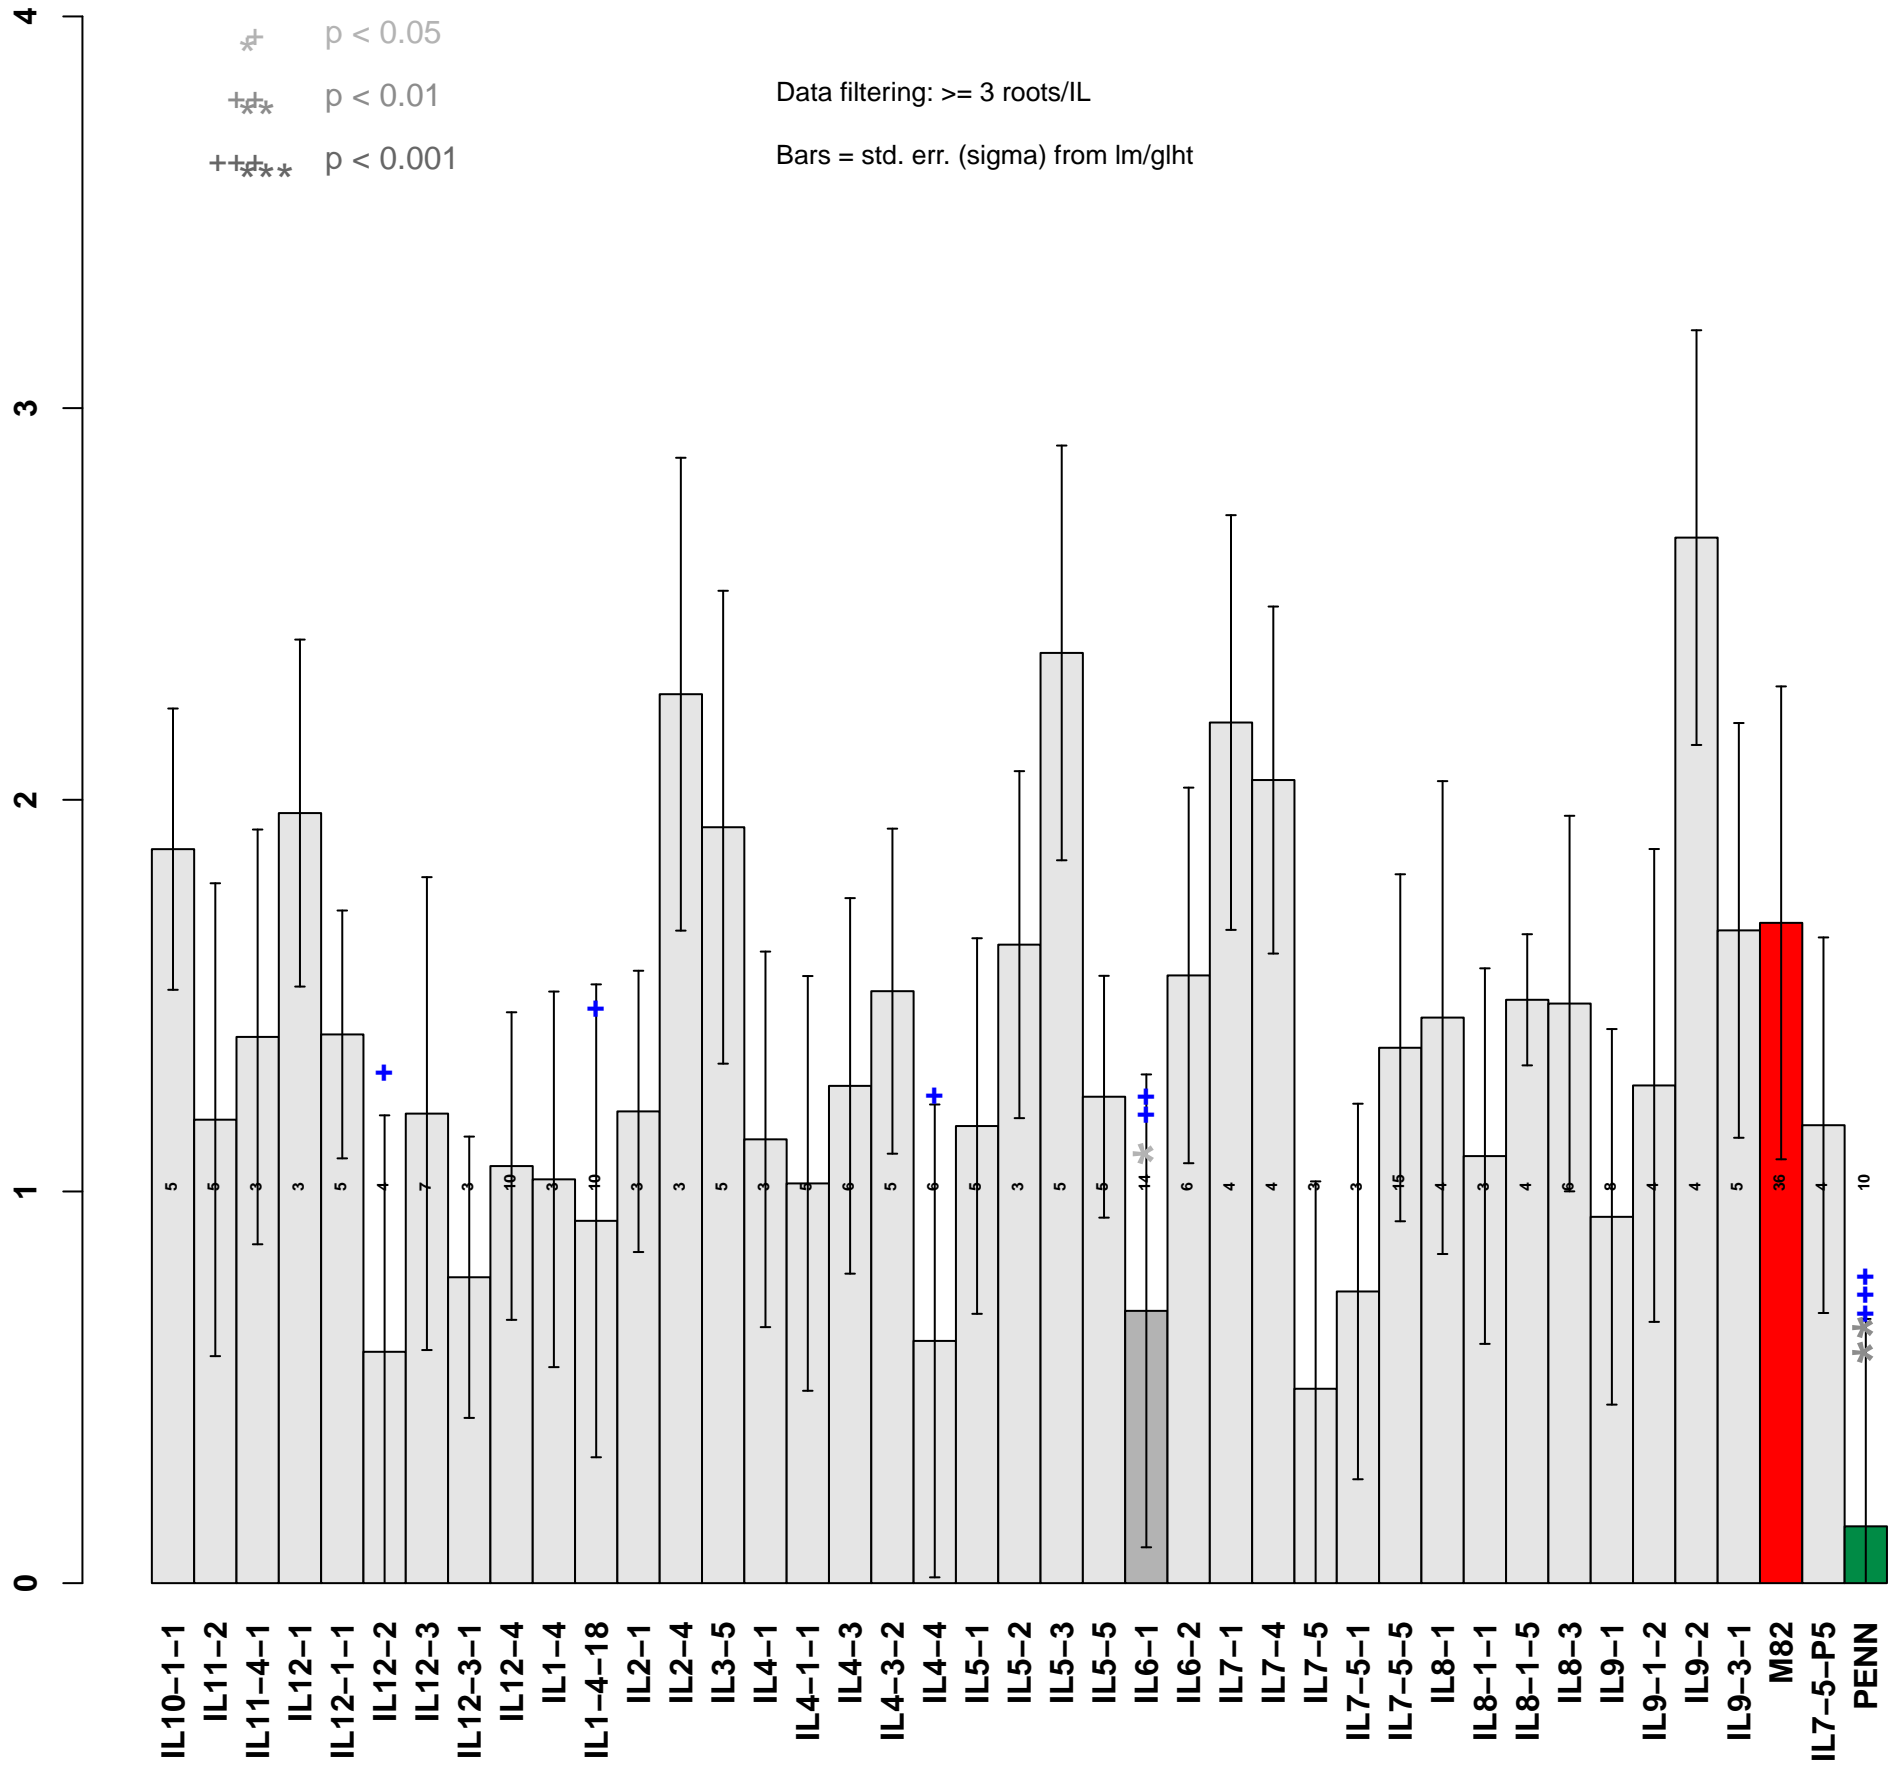

Angle Rate Thru T11

deg/225s

\* p < 0.05  
+\* p < 0.01  
++\* p < 0.001

Data filtering: >= 3 roots/IL

Bars = std. err. (sigma) from lm/glht

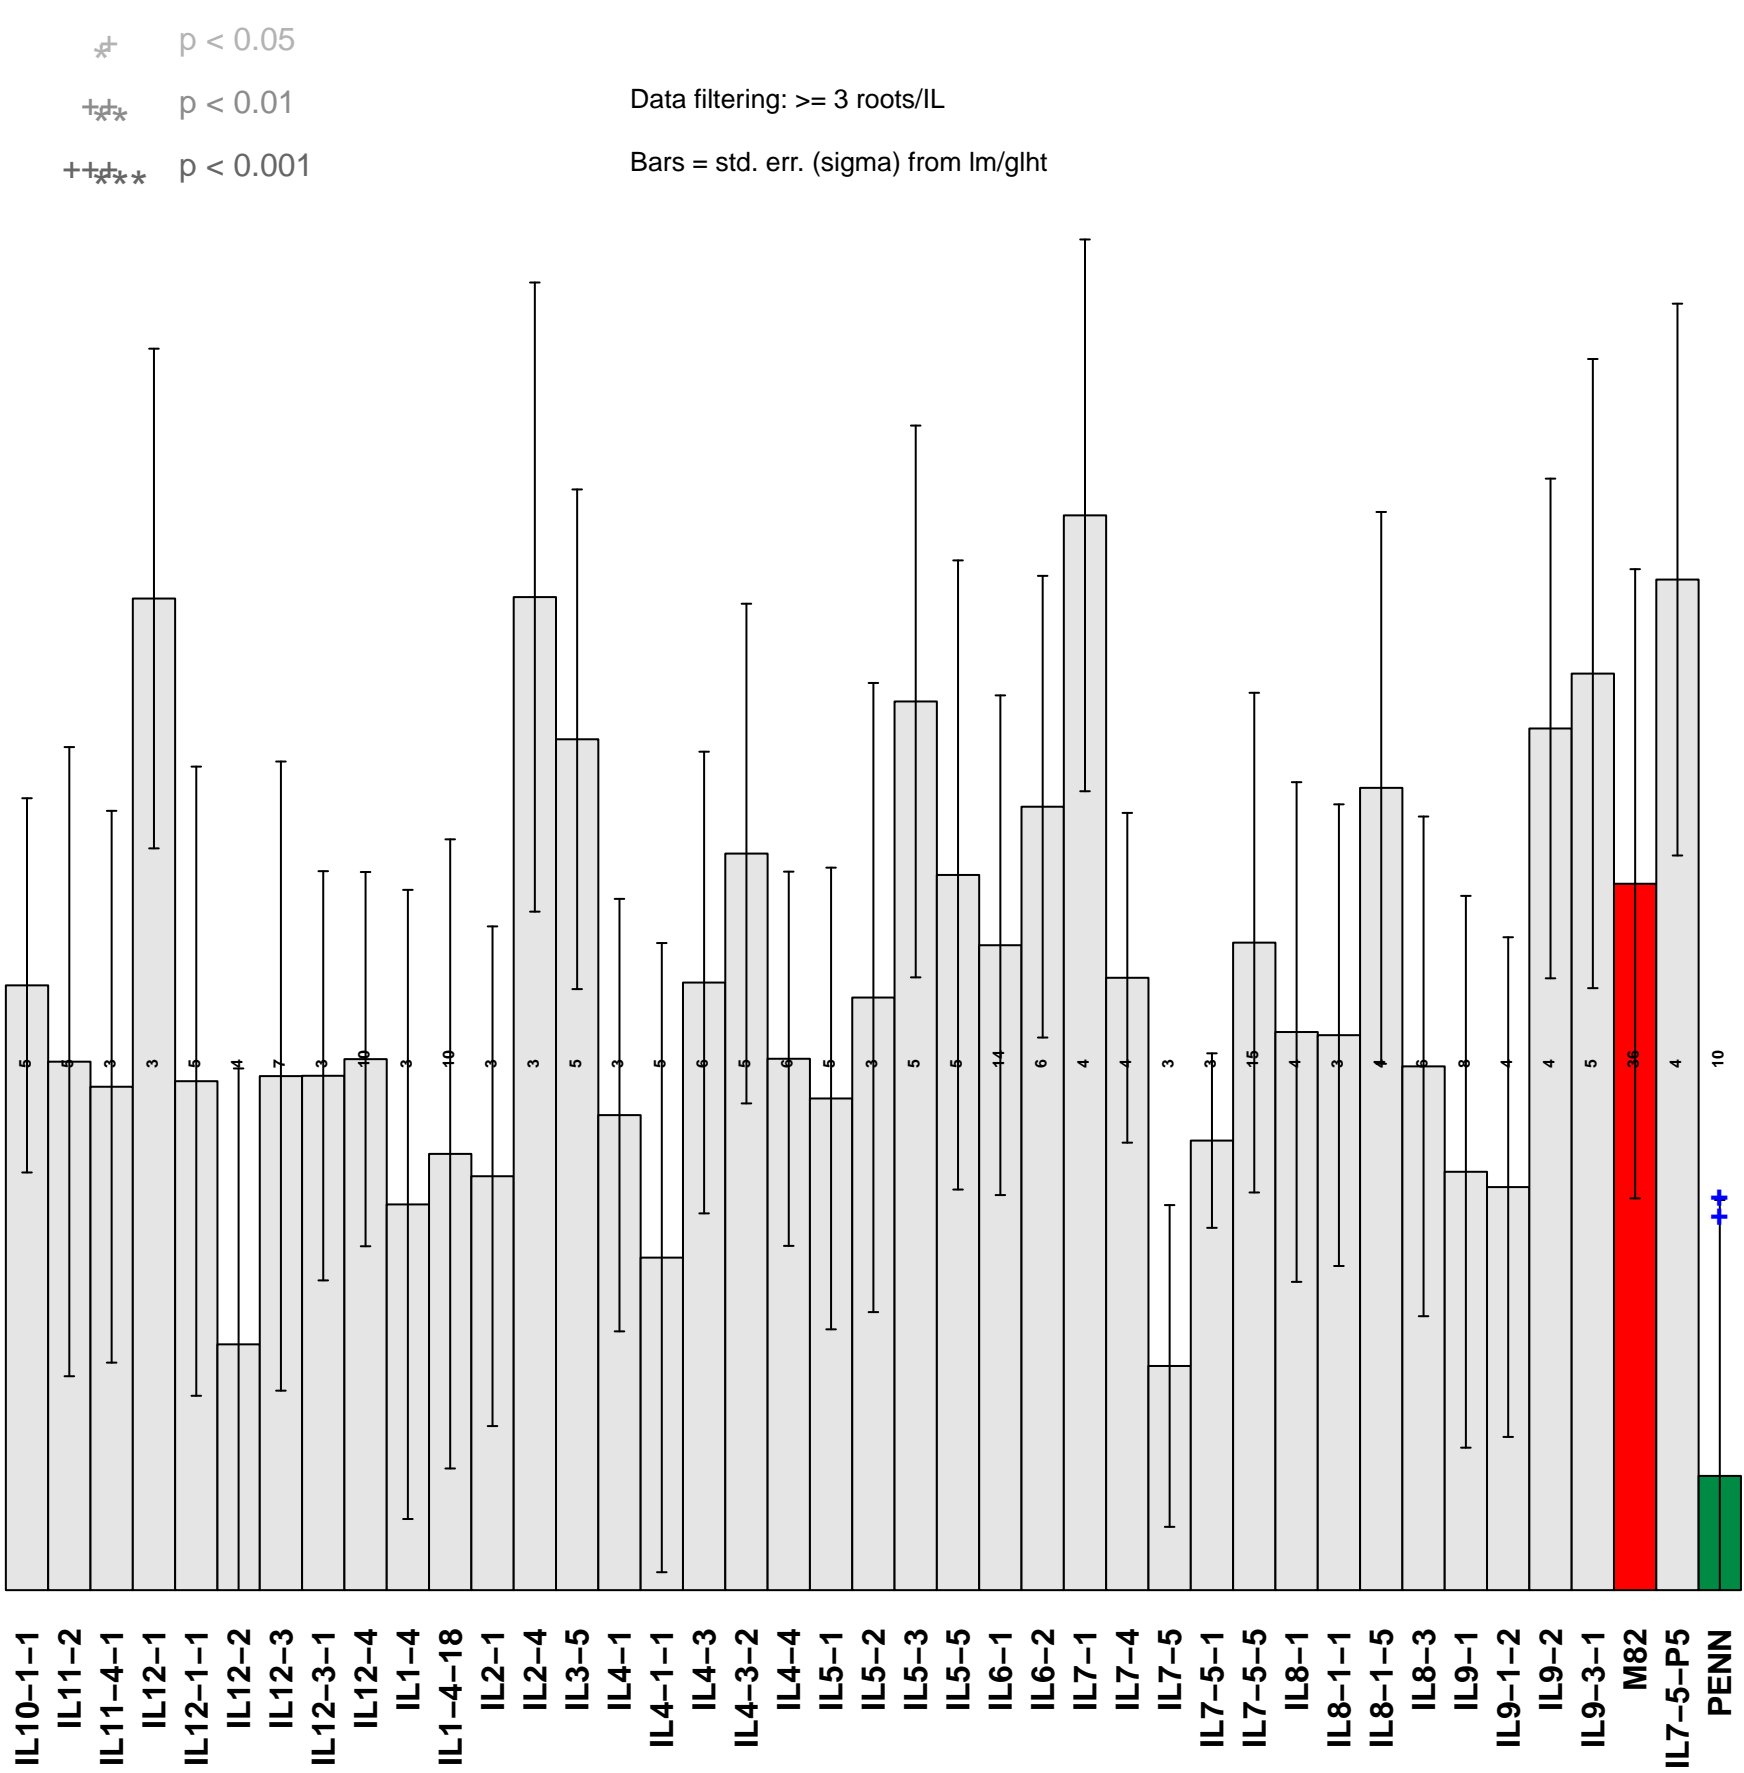

Angle Rate Thru T12

deg/225s

\* p < 0.05  
+\* p < 0.01  
++\* p < 0.001

Data filtering: >= 3 roots/IL

Bars = std. err. (sigma) from lm/glht

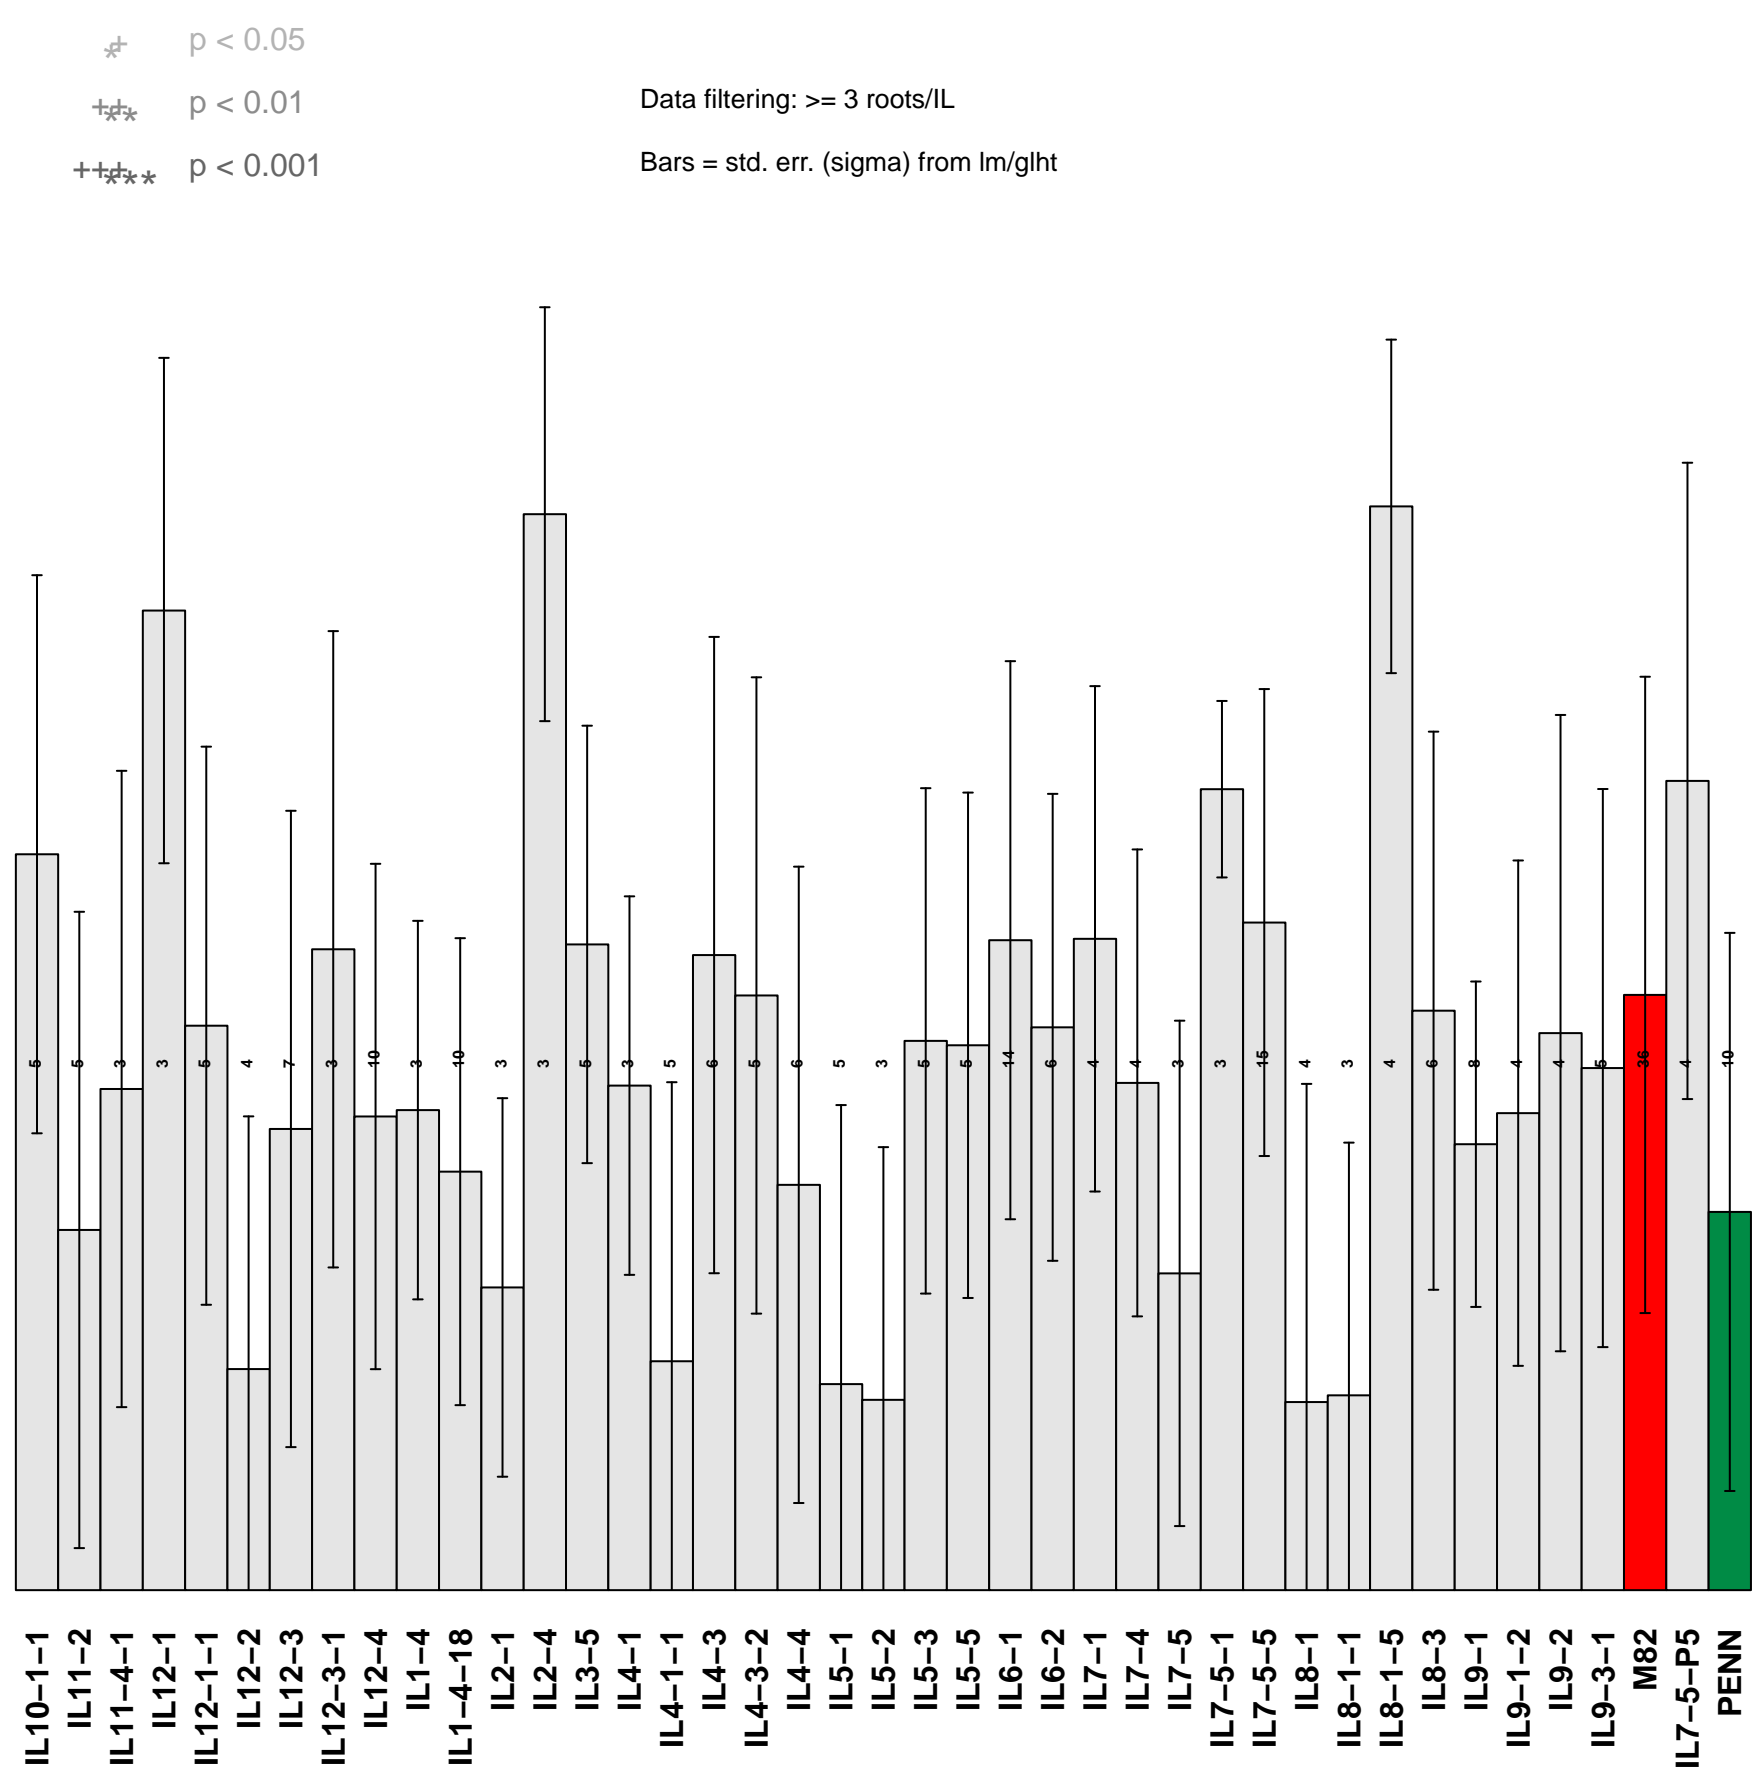

Angle Rate Thru T13

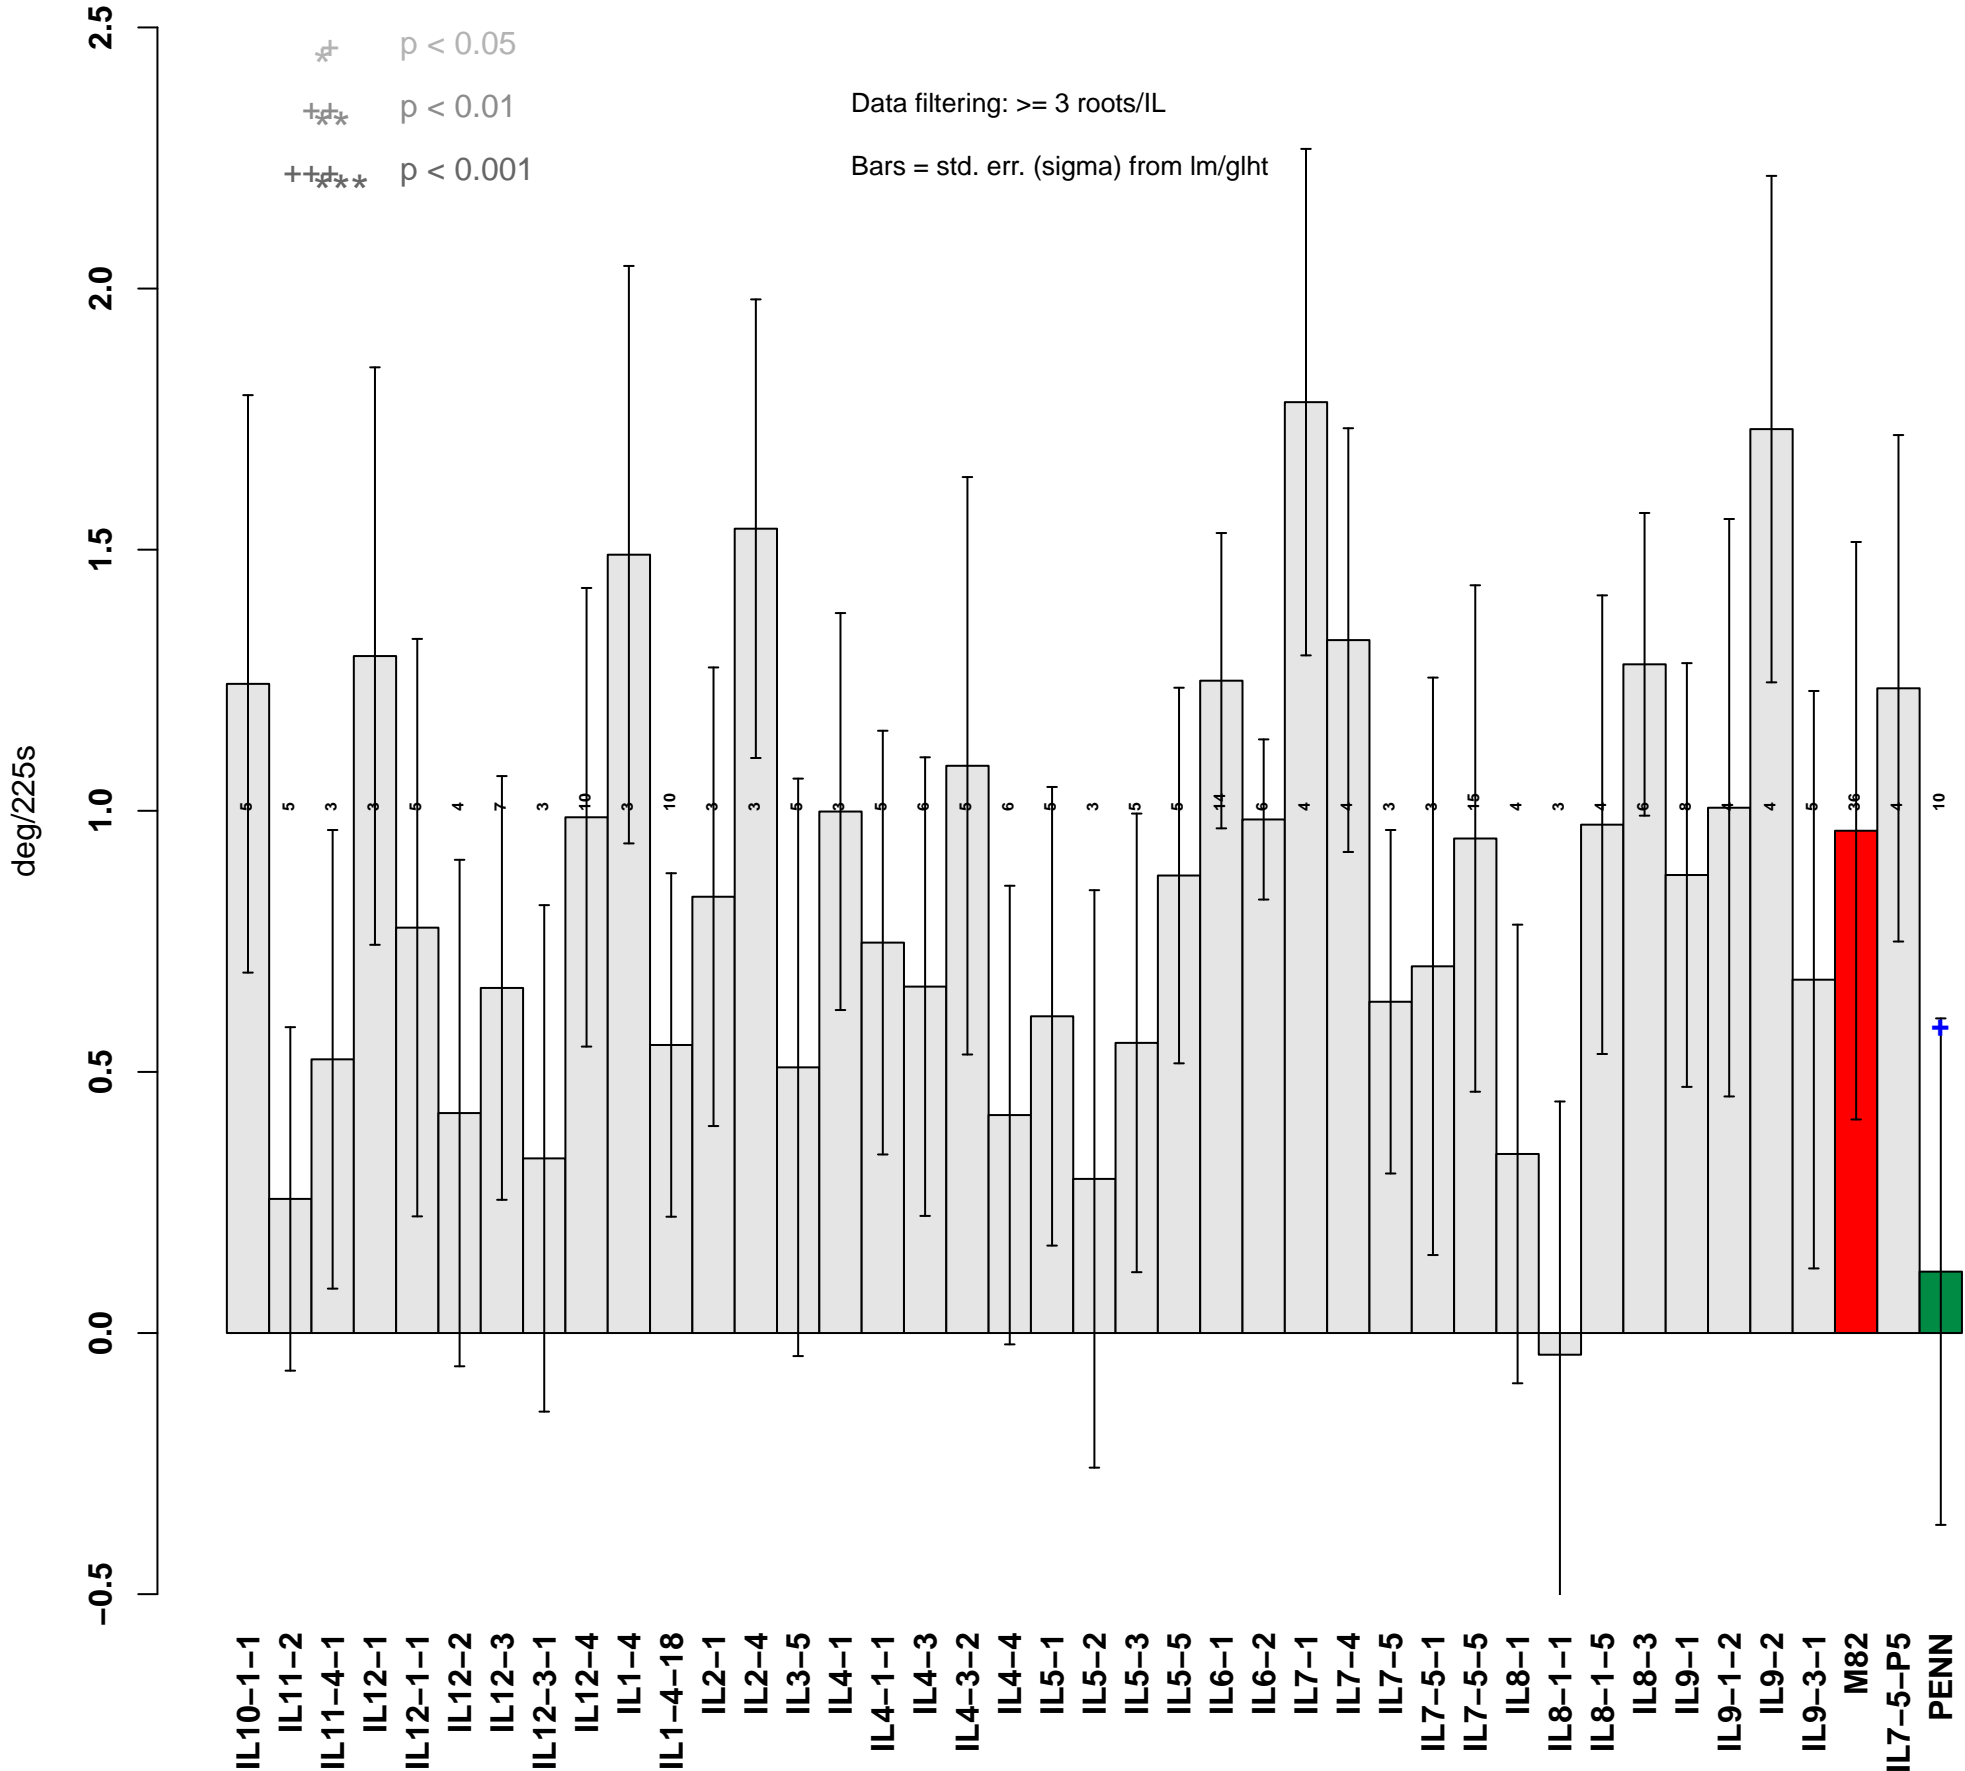

Angle Rate Thru T14

\*+ p < 0.05  
+\*+ p < 0.01  
++\*+\* p < 0.001

Data filtering: >= 3 roots/IL

Bars = std. err. (sigma) from lm/glht

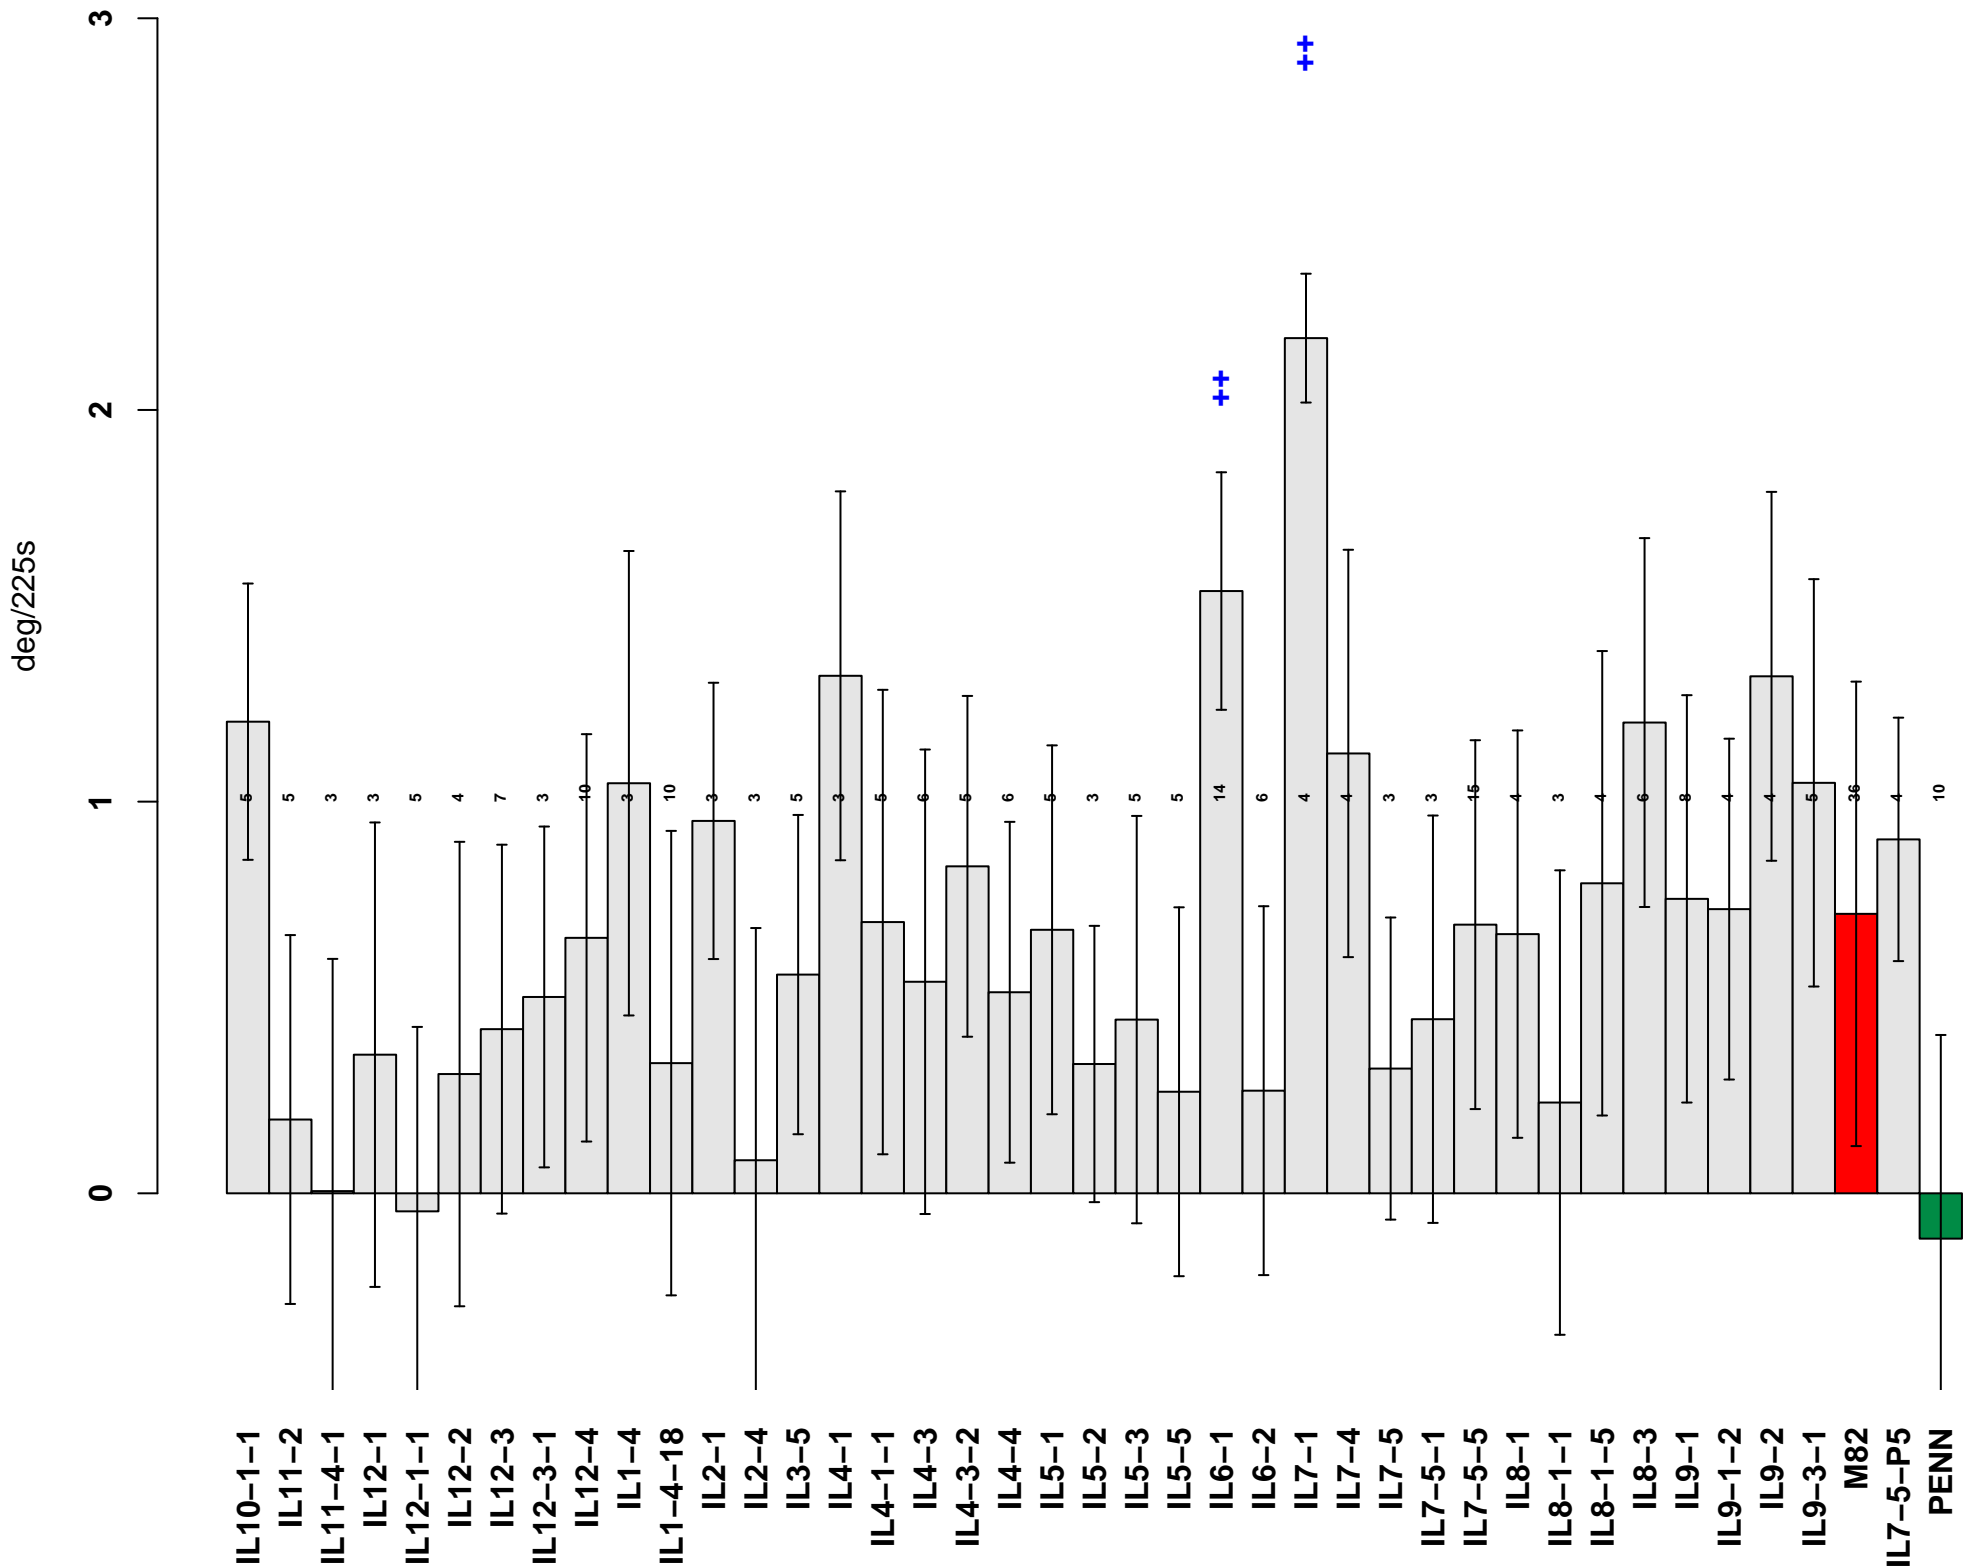

Angle Rate Thru T15

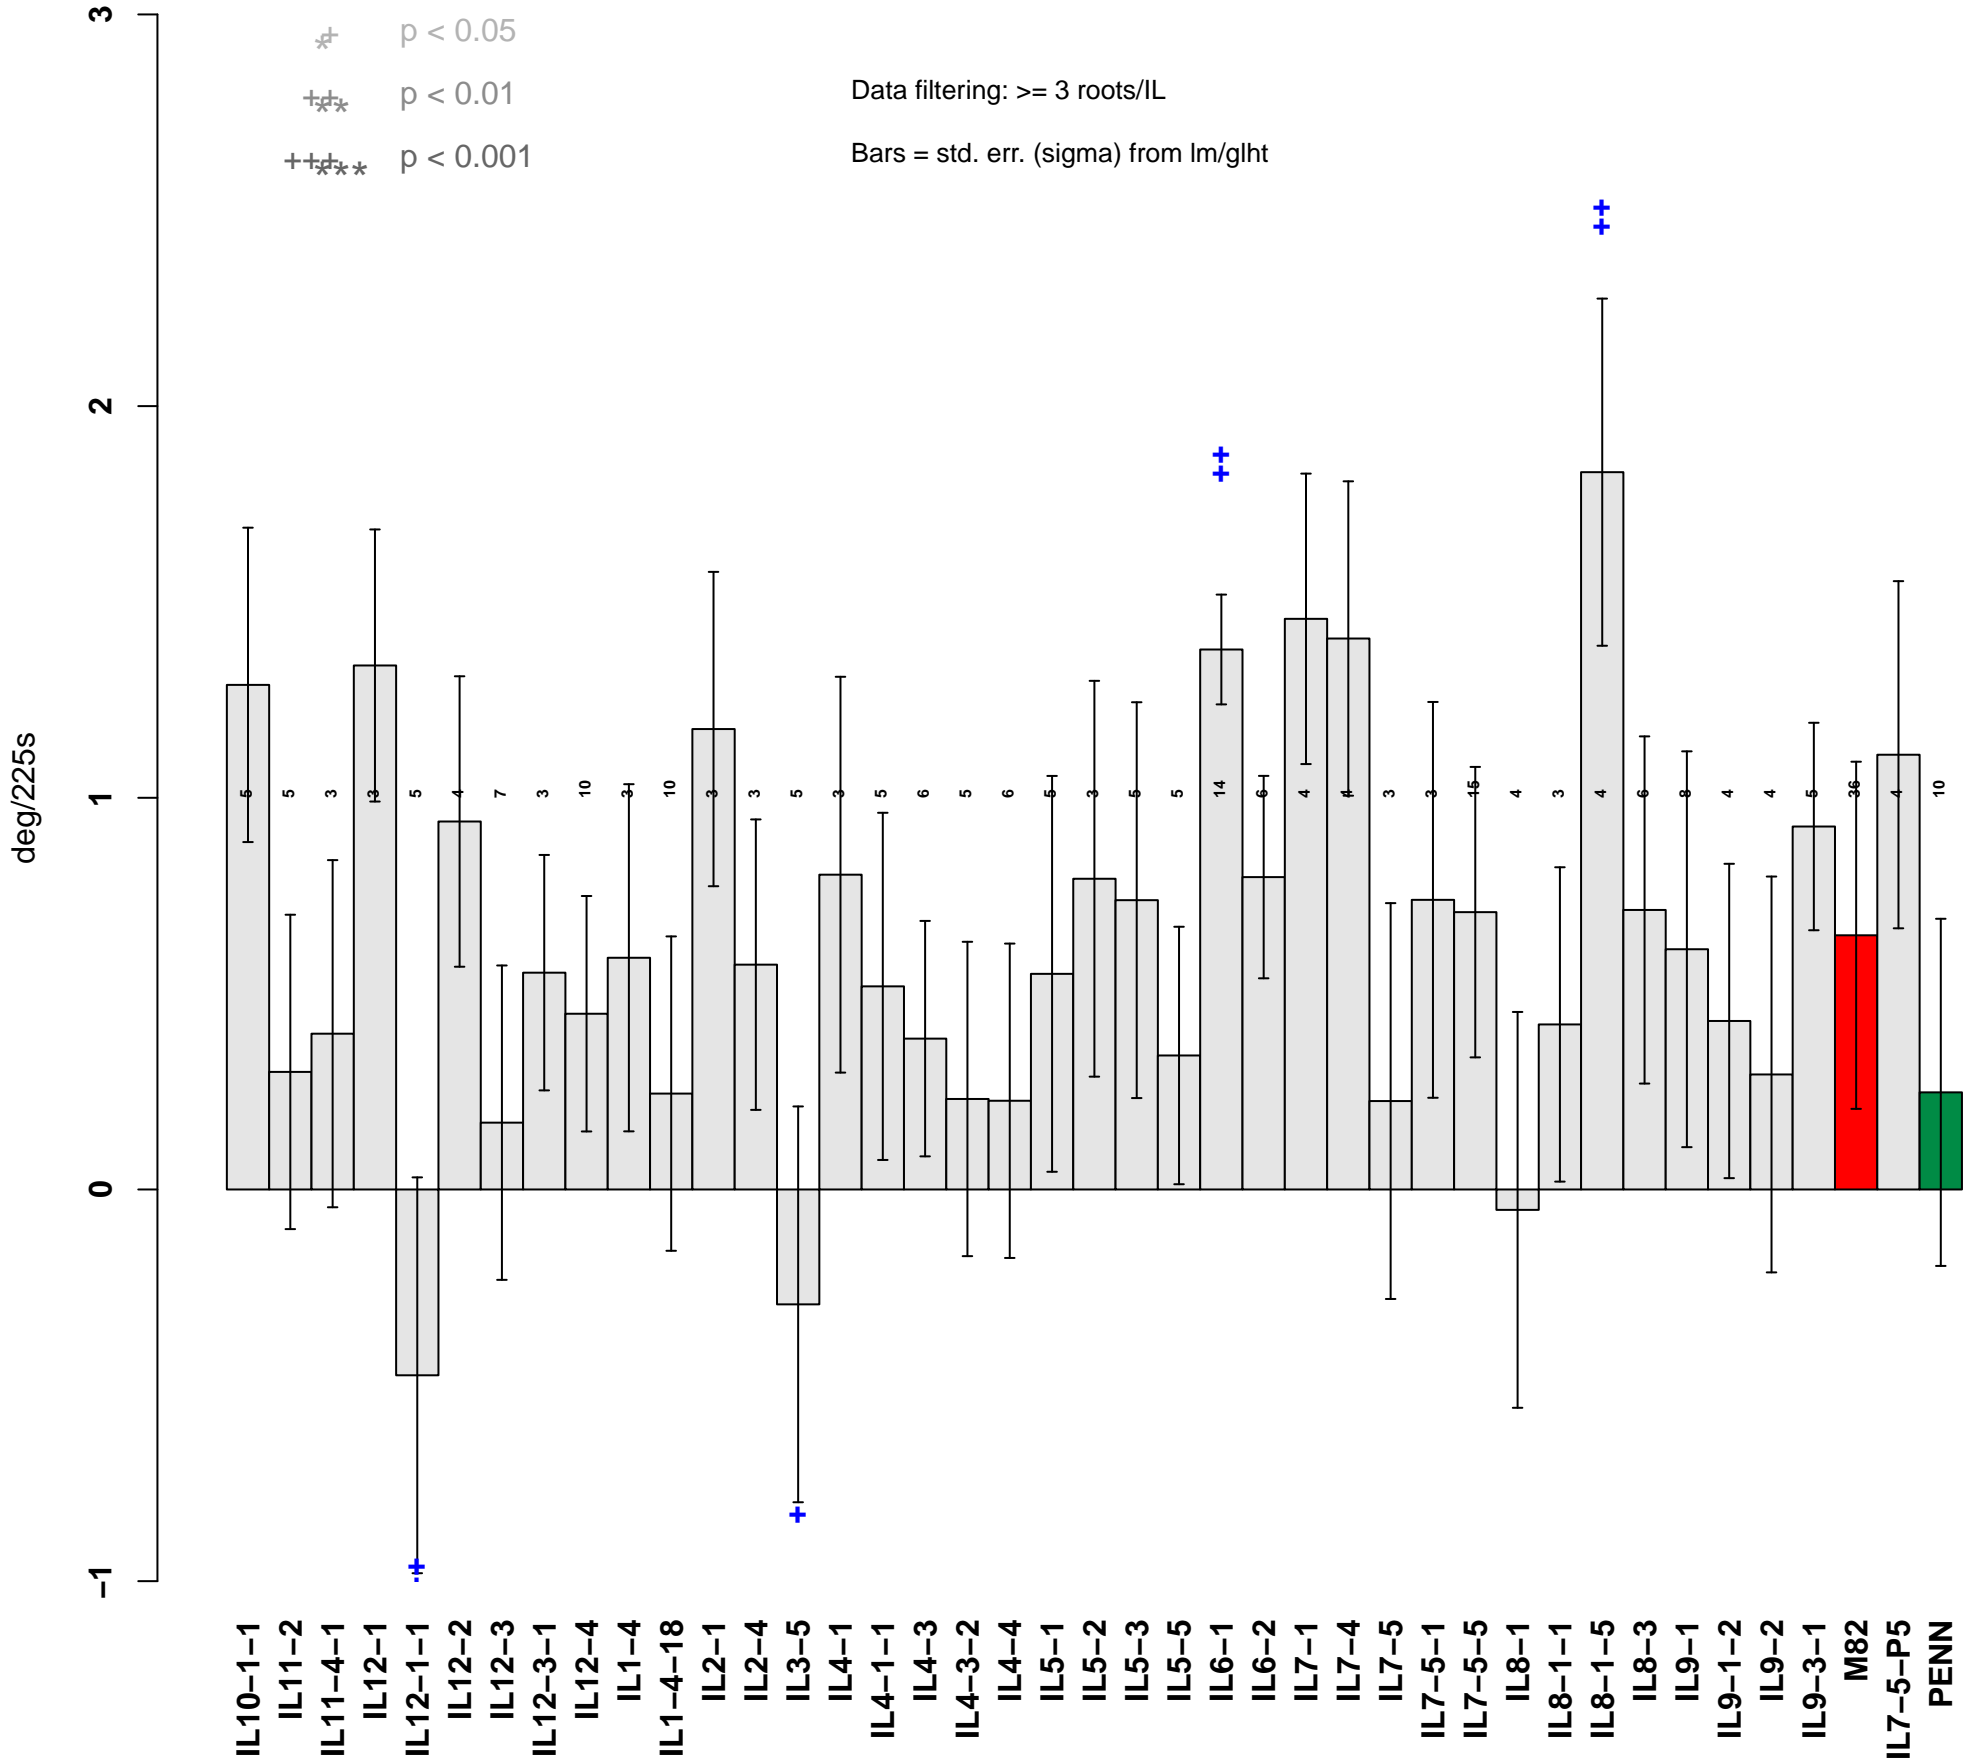

Angle Rate Thru T16

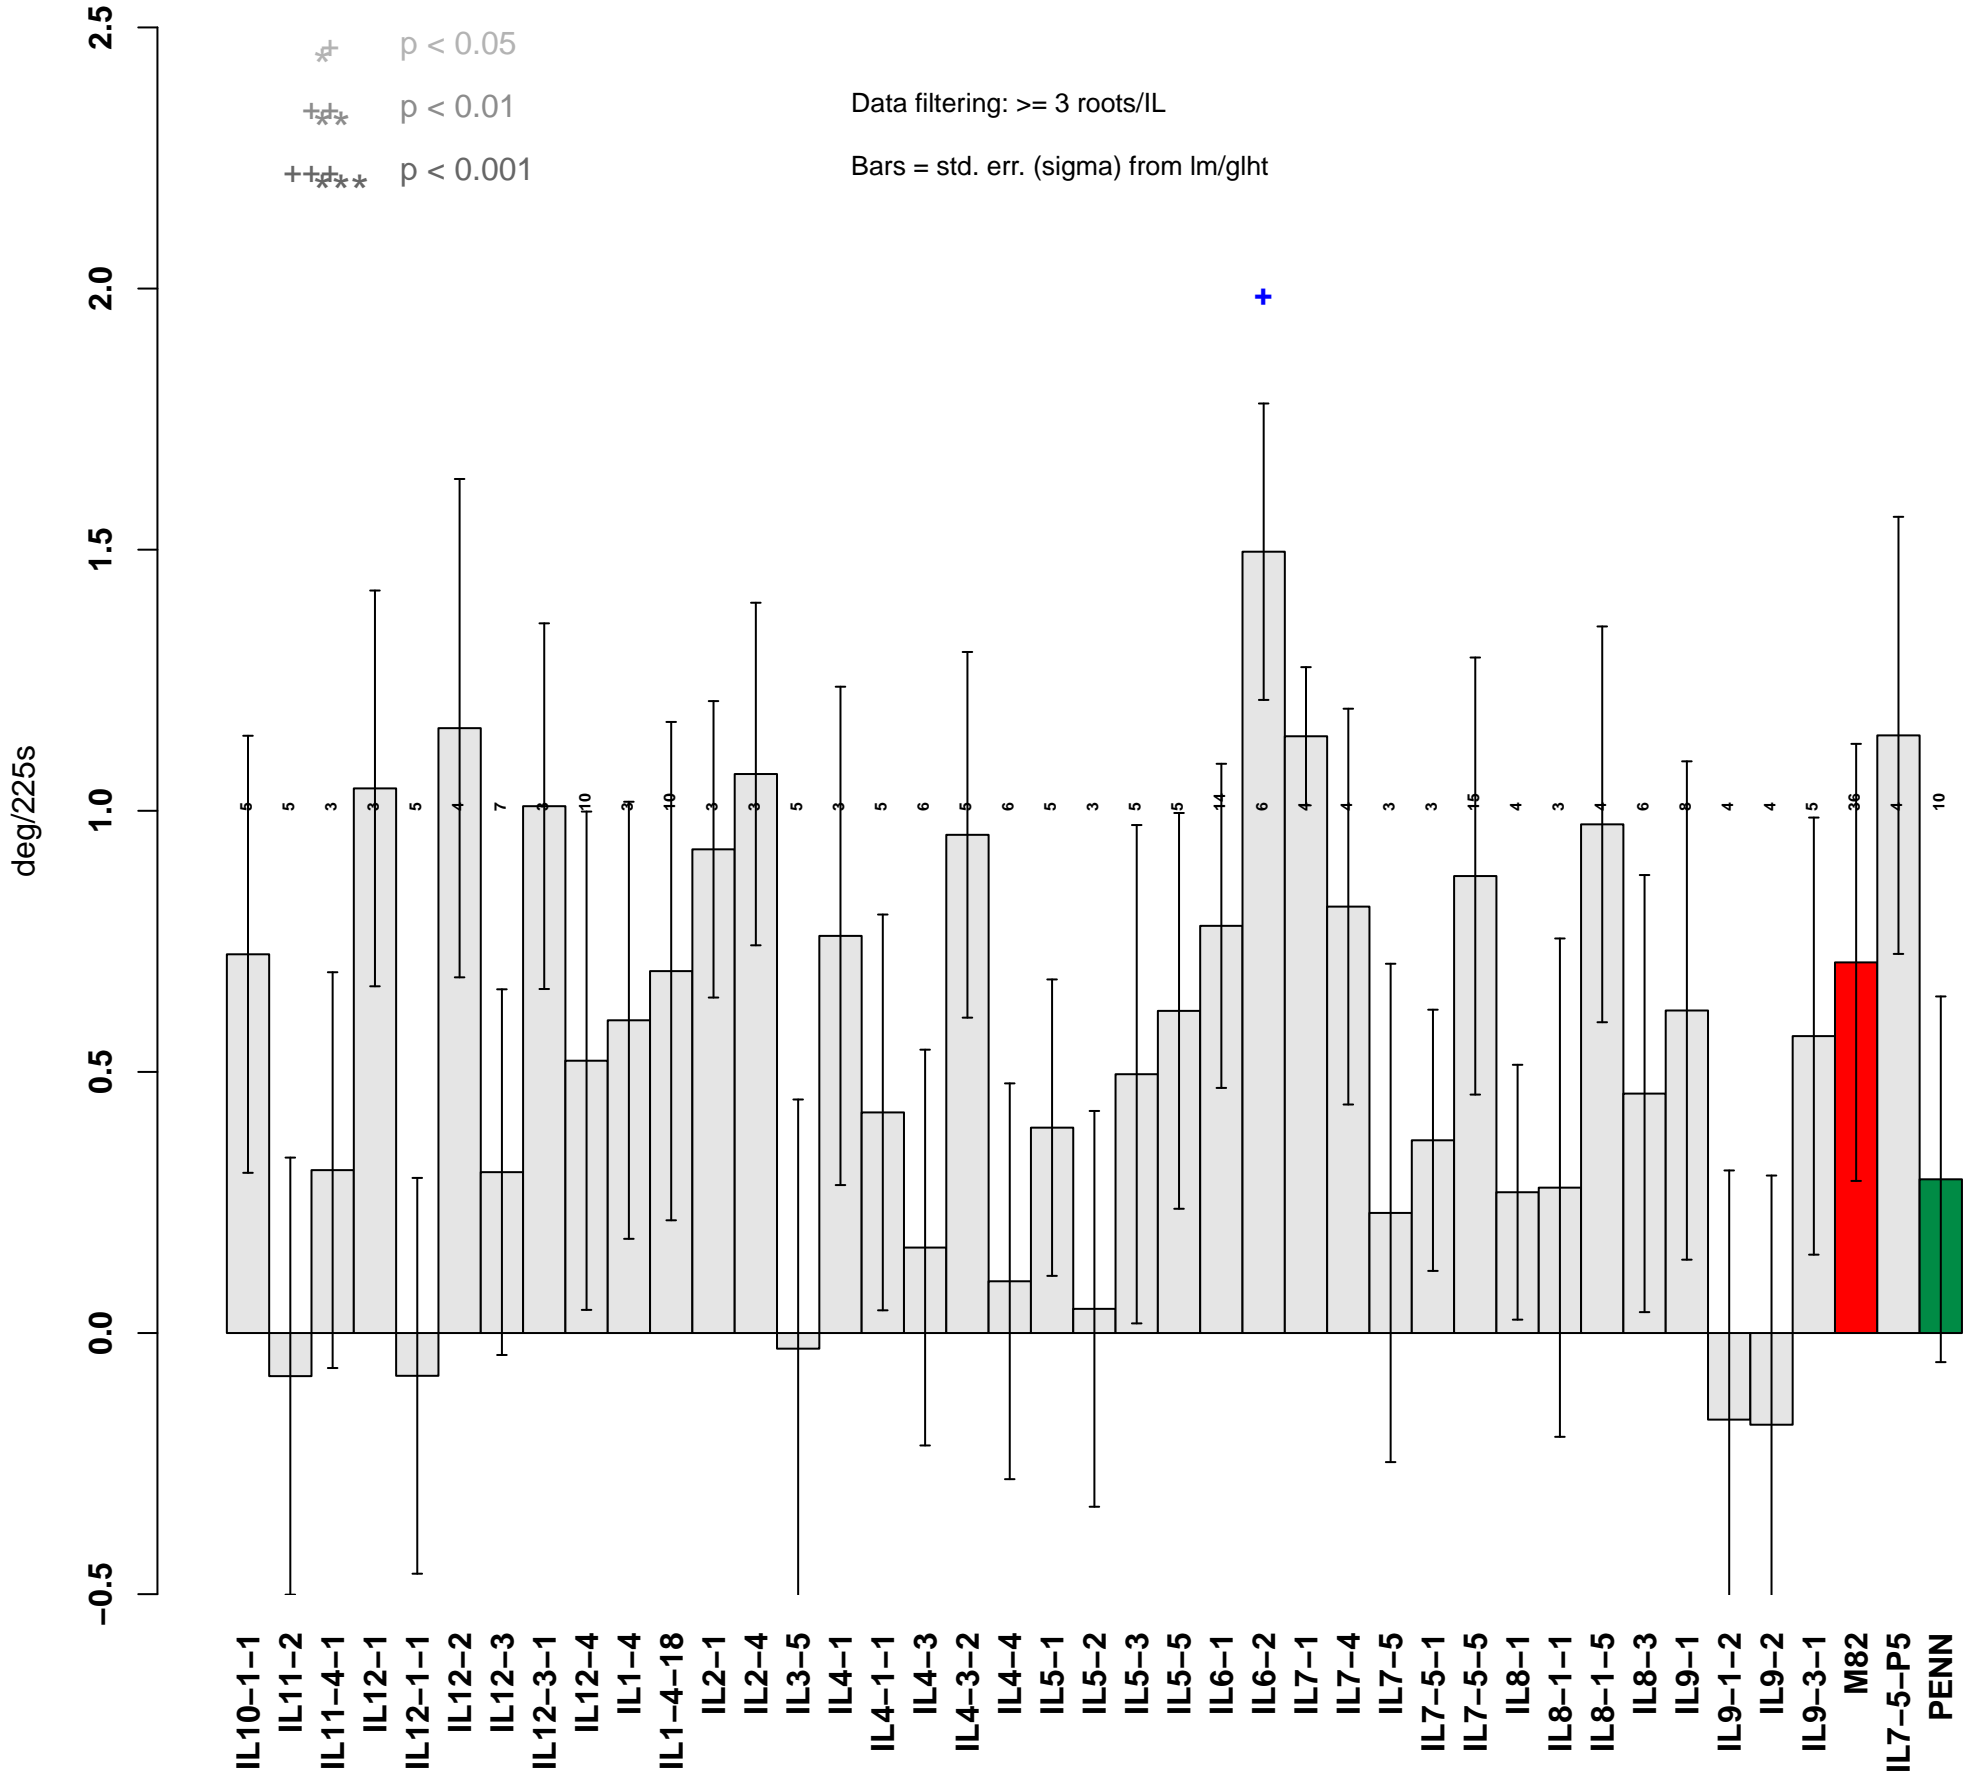

Angle Rate Thru T17

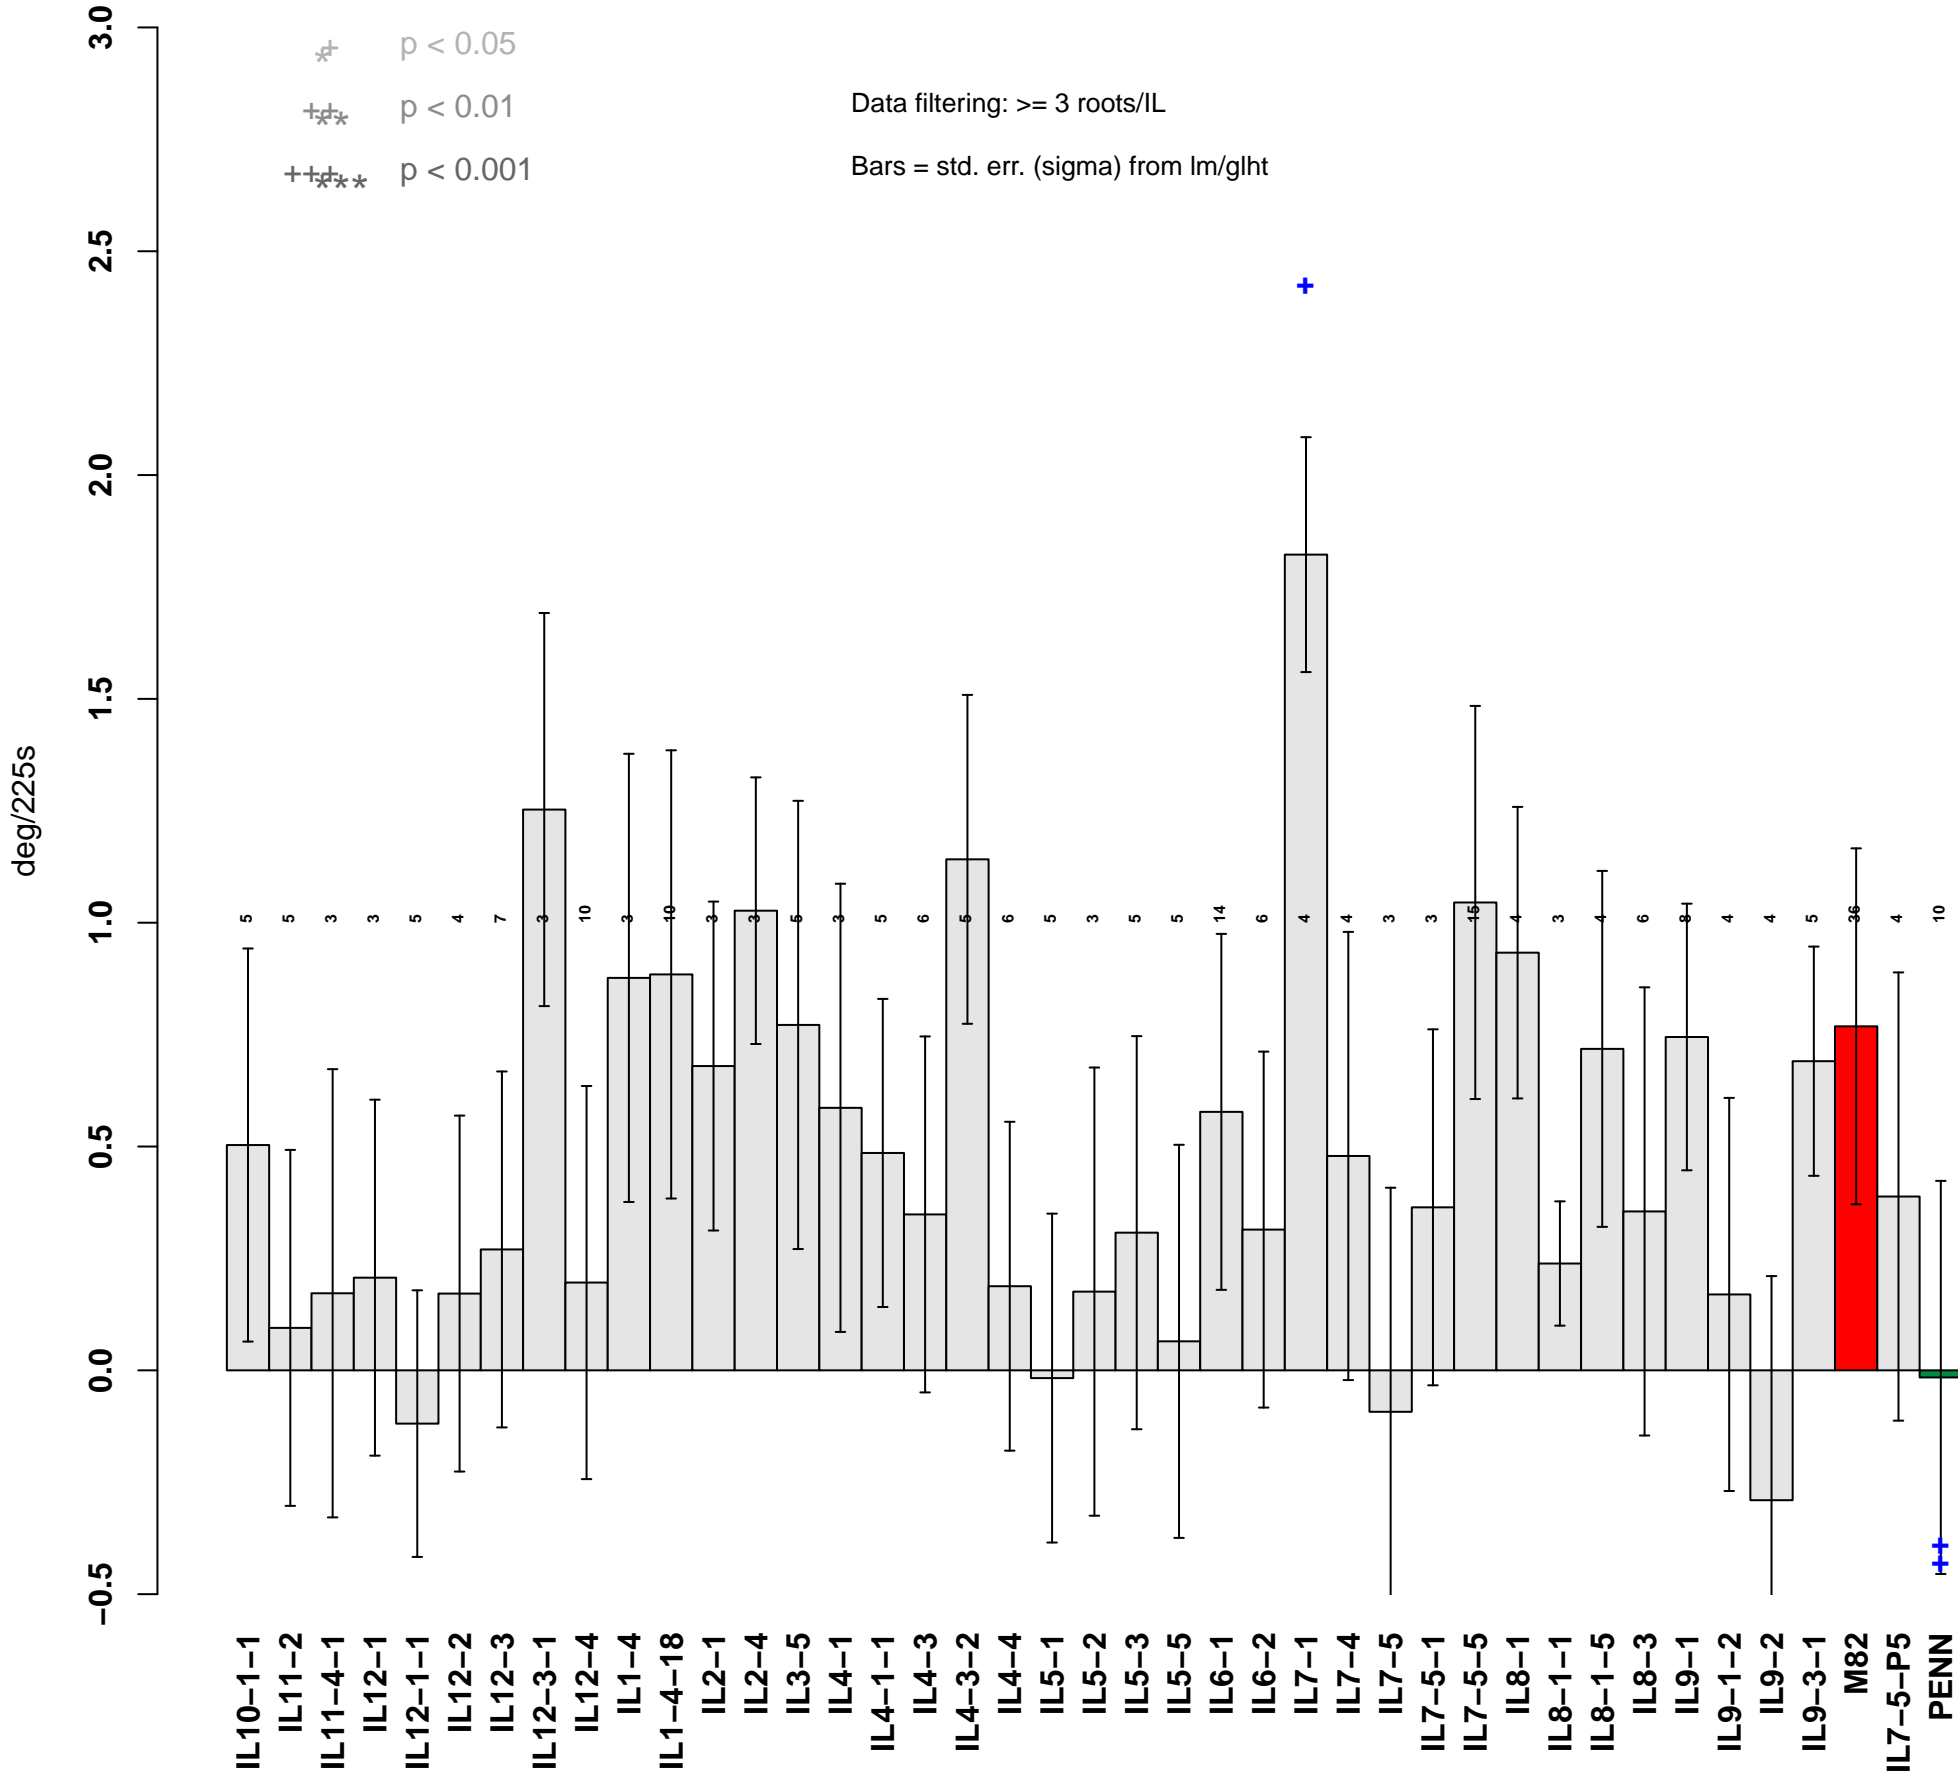

## Angle Rate Thru T18

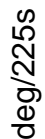

$p < 0.001$

Data filtering:  $\geq 3$  roots/IL

Bars = std. err. (sigma) from lm/glht

Angle Rate Thru T19

deg/225s

2.5  
2.0  
1.5  
1.0  
0.5  
0.0  
-0.5

+\* p < 0.05  
+\*+\* p < 0.01  
+\*+\*+\* p < 0.001

Data filtering: >= 3 roots/IL  
Bars = std. err. (sigma) from lm/glht

IL10-1-1  
IL11-2  
IL11-4-1  
IL12-1  
IL12-1-1  
IL12-2  
IL12-3  
IL12-3-1  
IL12-4  
IL1-4  
IL1-4-18  
IL2-1  
IL2-4  
IL3-5  
IL4-1  
IL4-1-1  
IL4-3  
IL4-3-2  
IL4-4  
IL5-1  
IL5-2  
IL5-3  
IL5-5  
IL6-1  
IL6-2  
IL7-1  
IL7-4  
IL7-5  
IL7-5-1  
IL7-5-5  
IL8-1  
IL8-1-1  
IL8-1-5  
IL8-3  
IL9-1  
IL9-1-2  
IL9-2  
IL9-3-1  
M82  
IL7-5-P5  
PENN

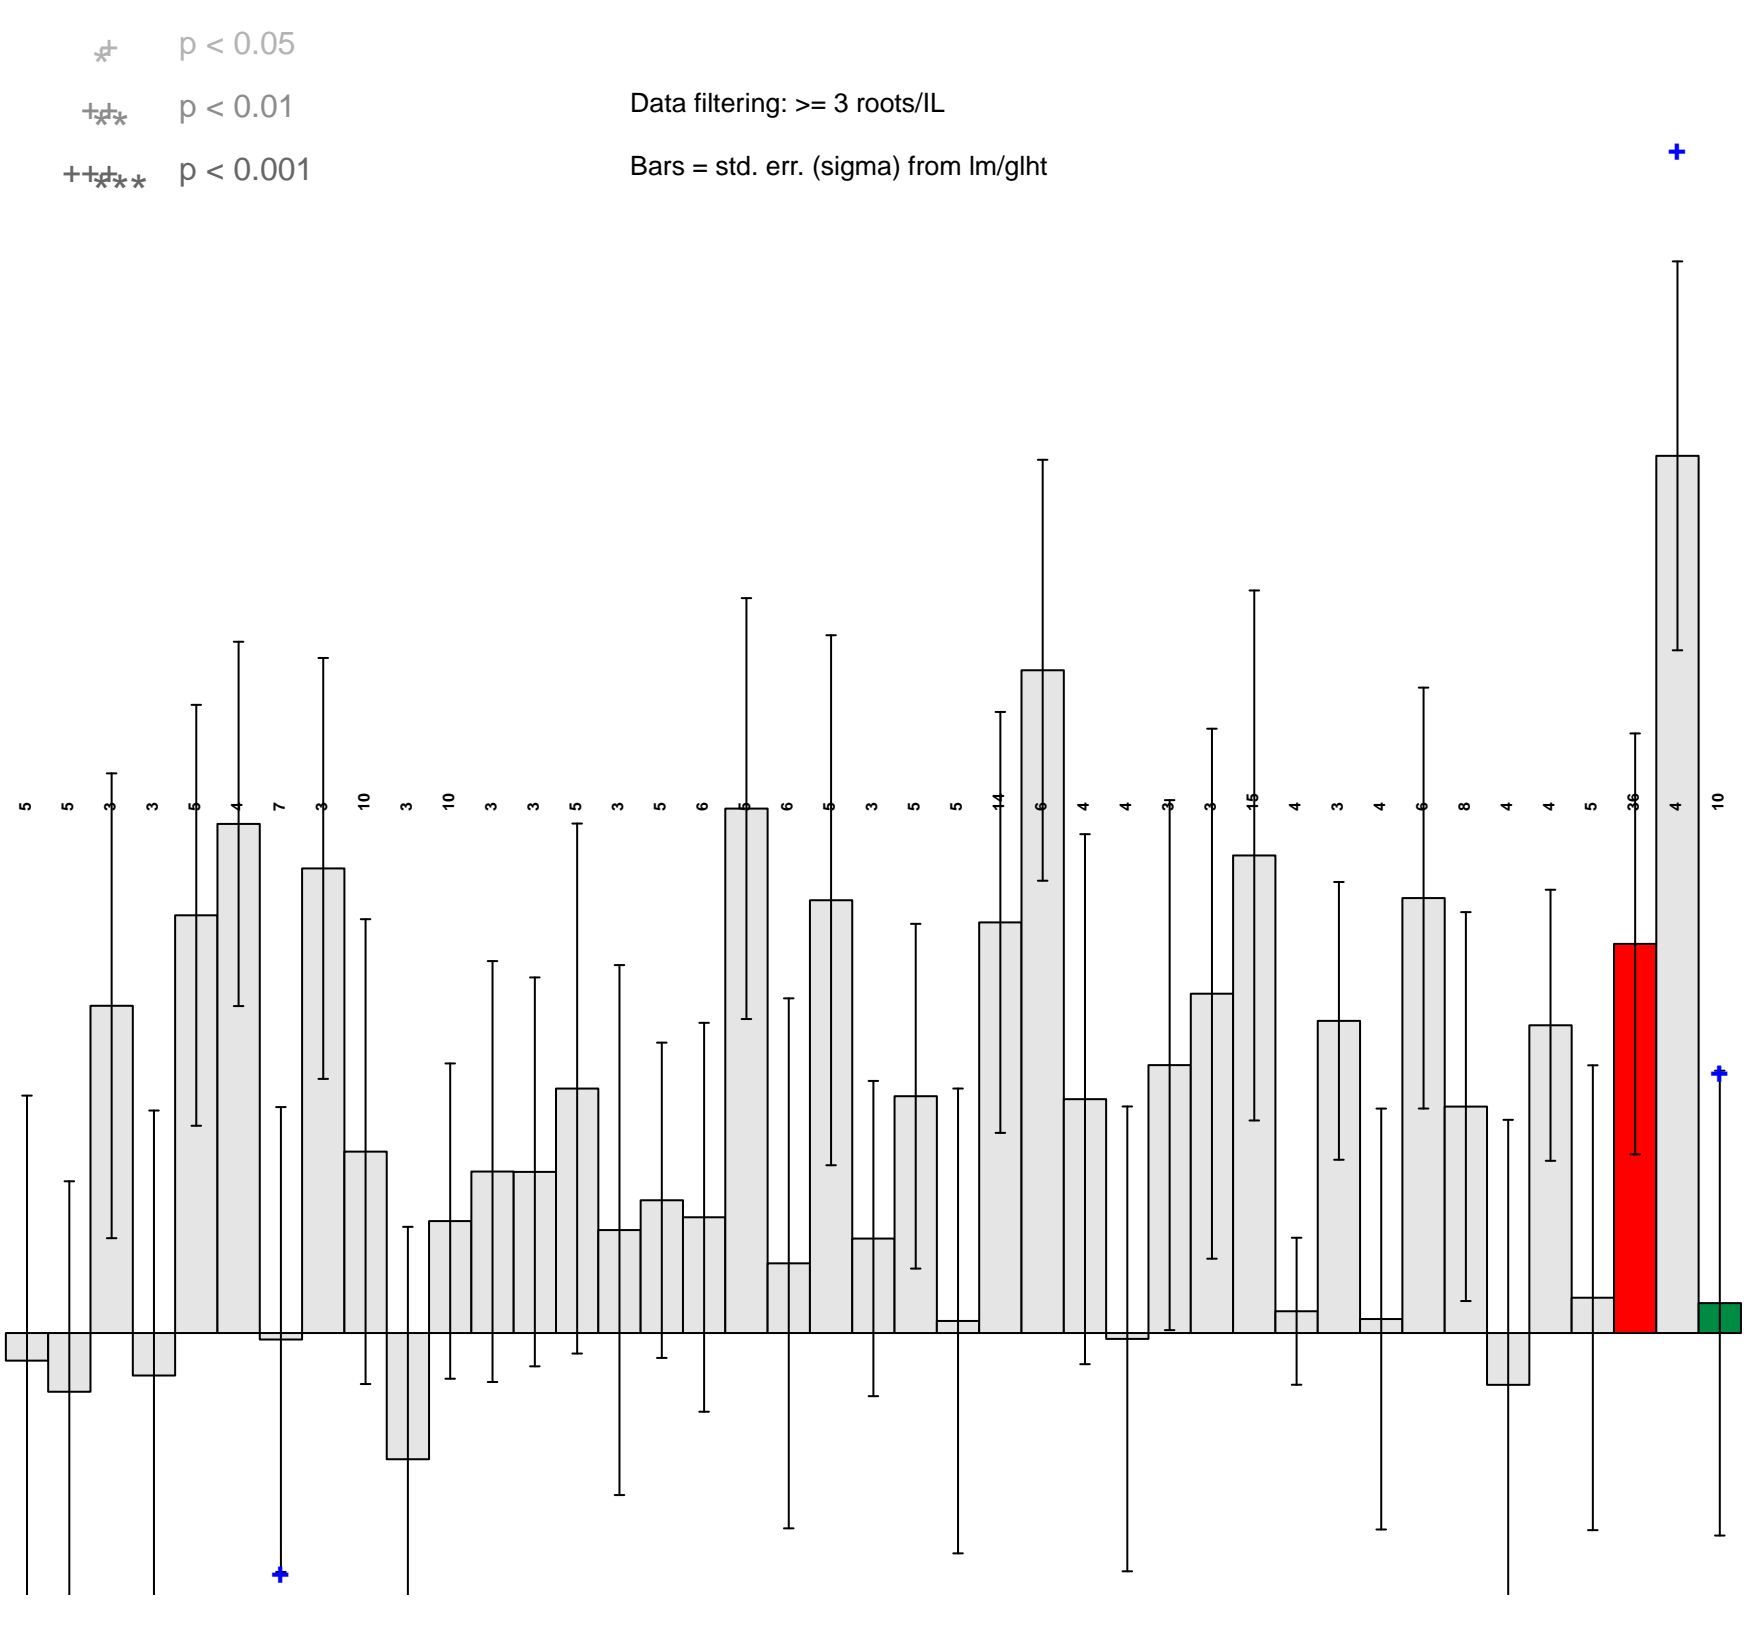

# Angle Rate Thru T20

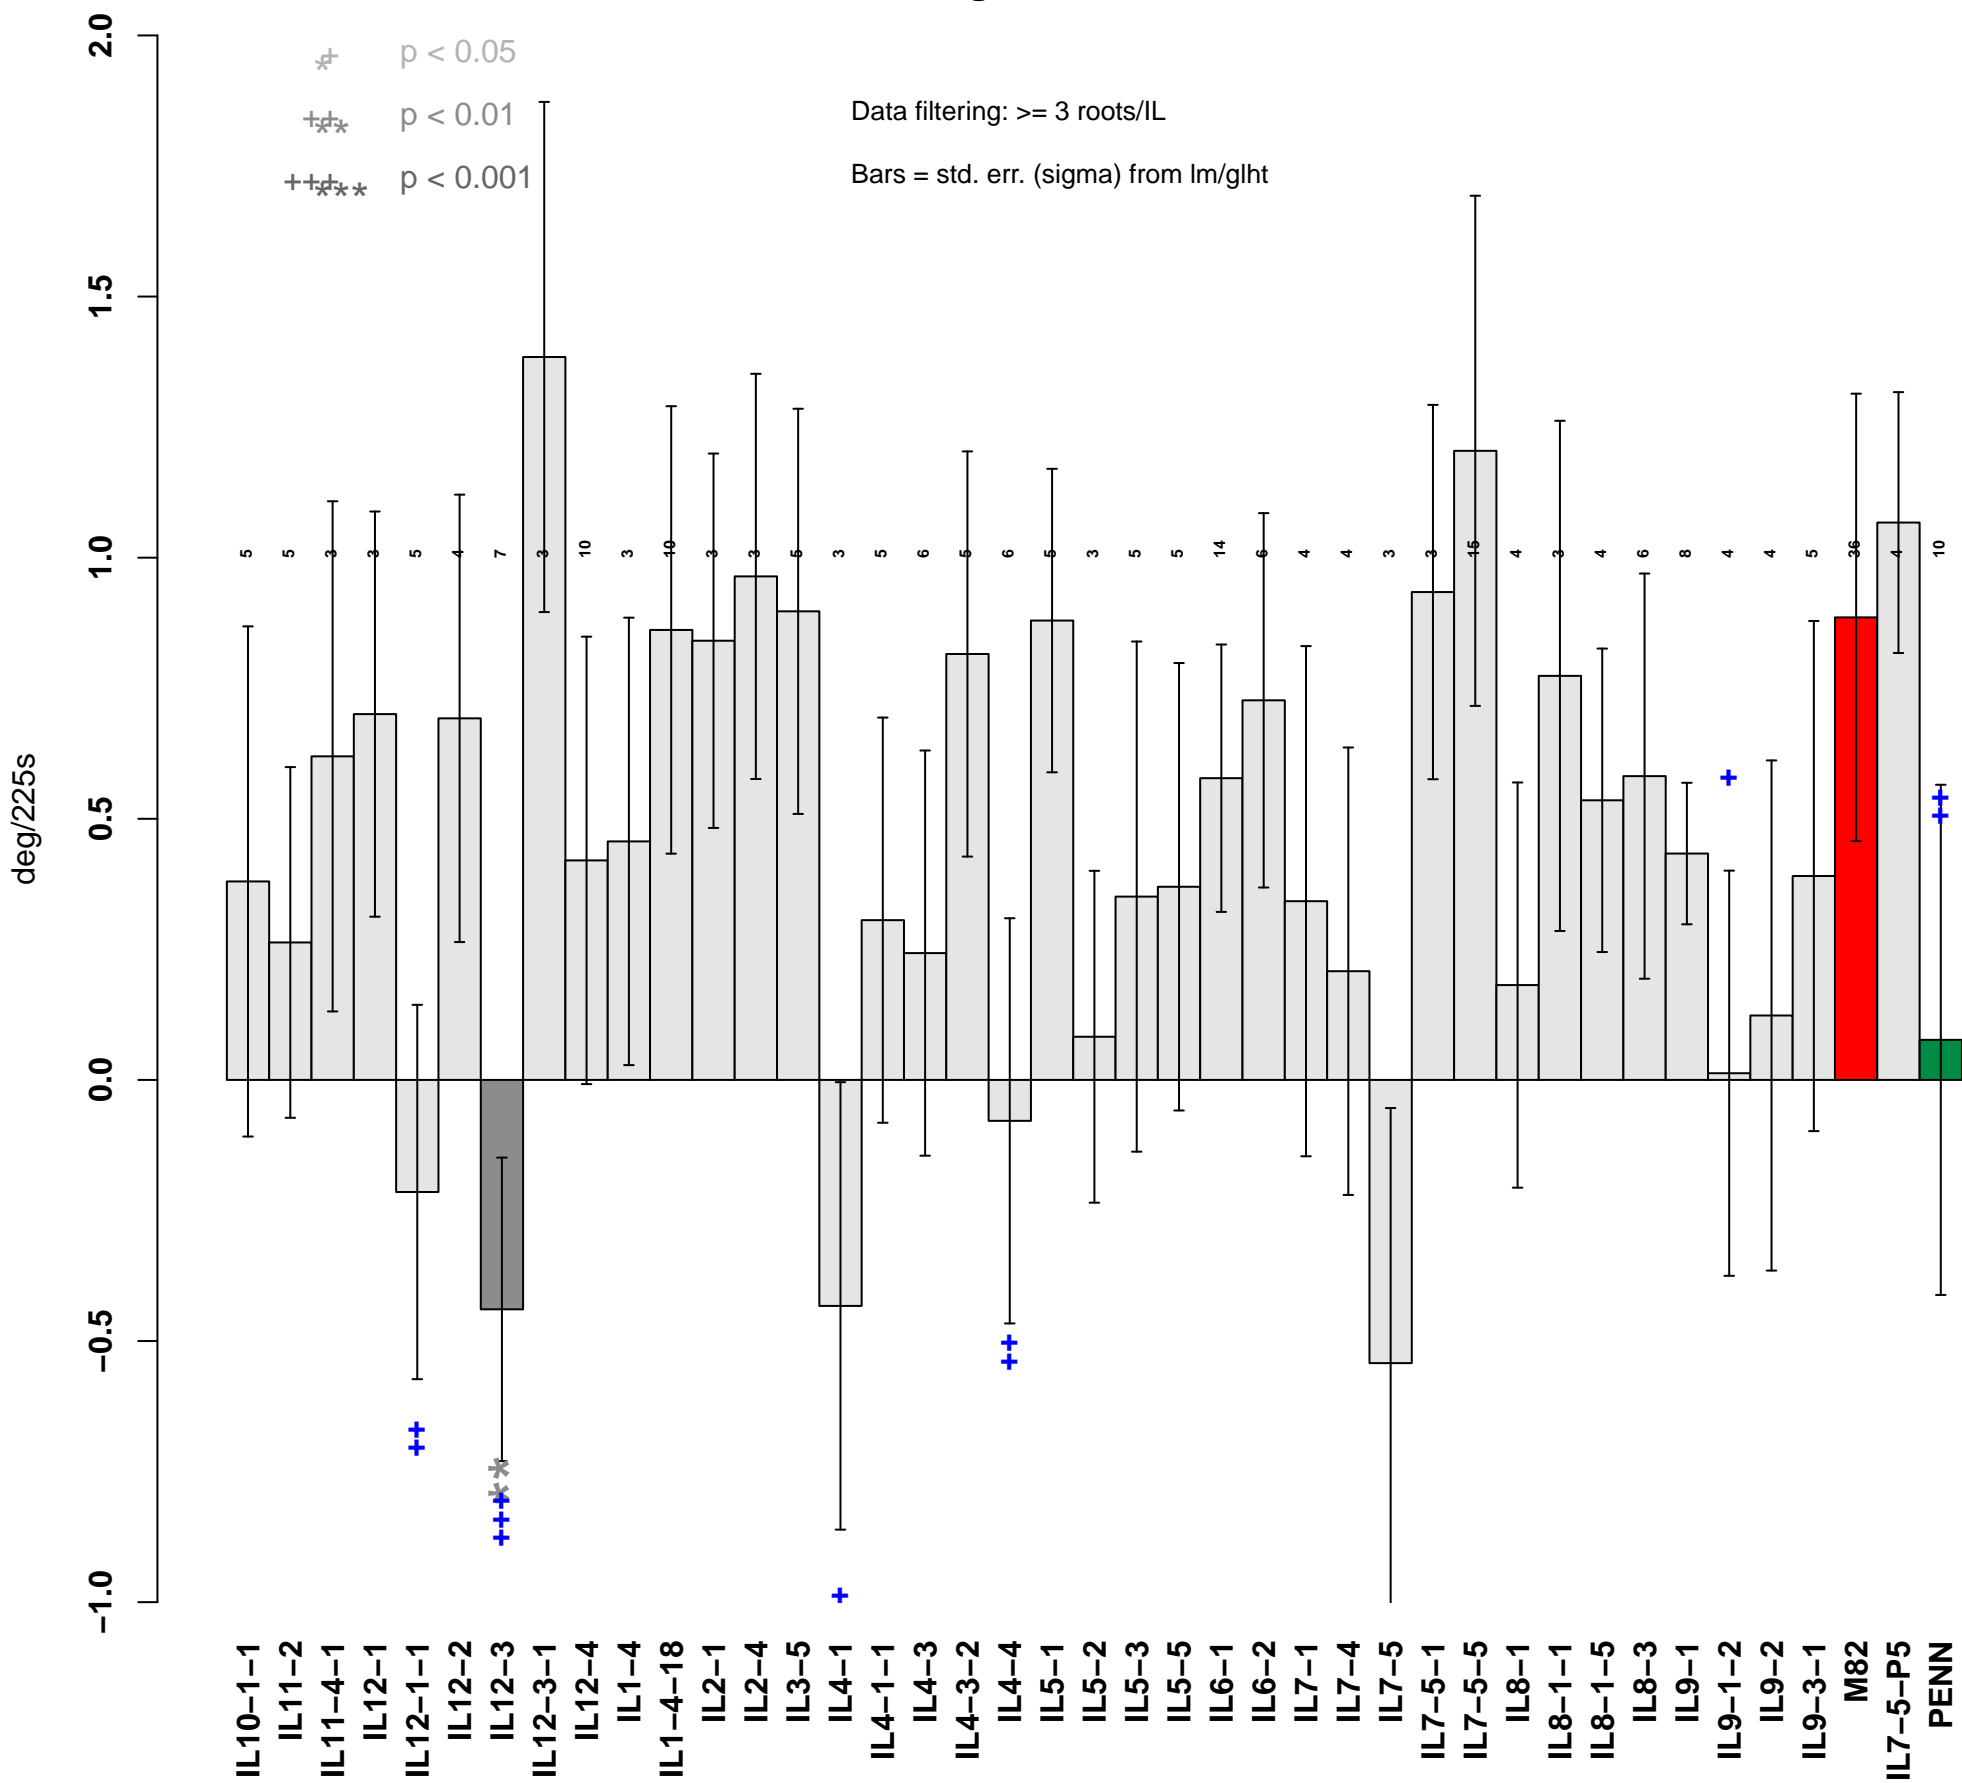

Angle Rate Thru T21

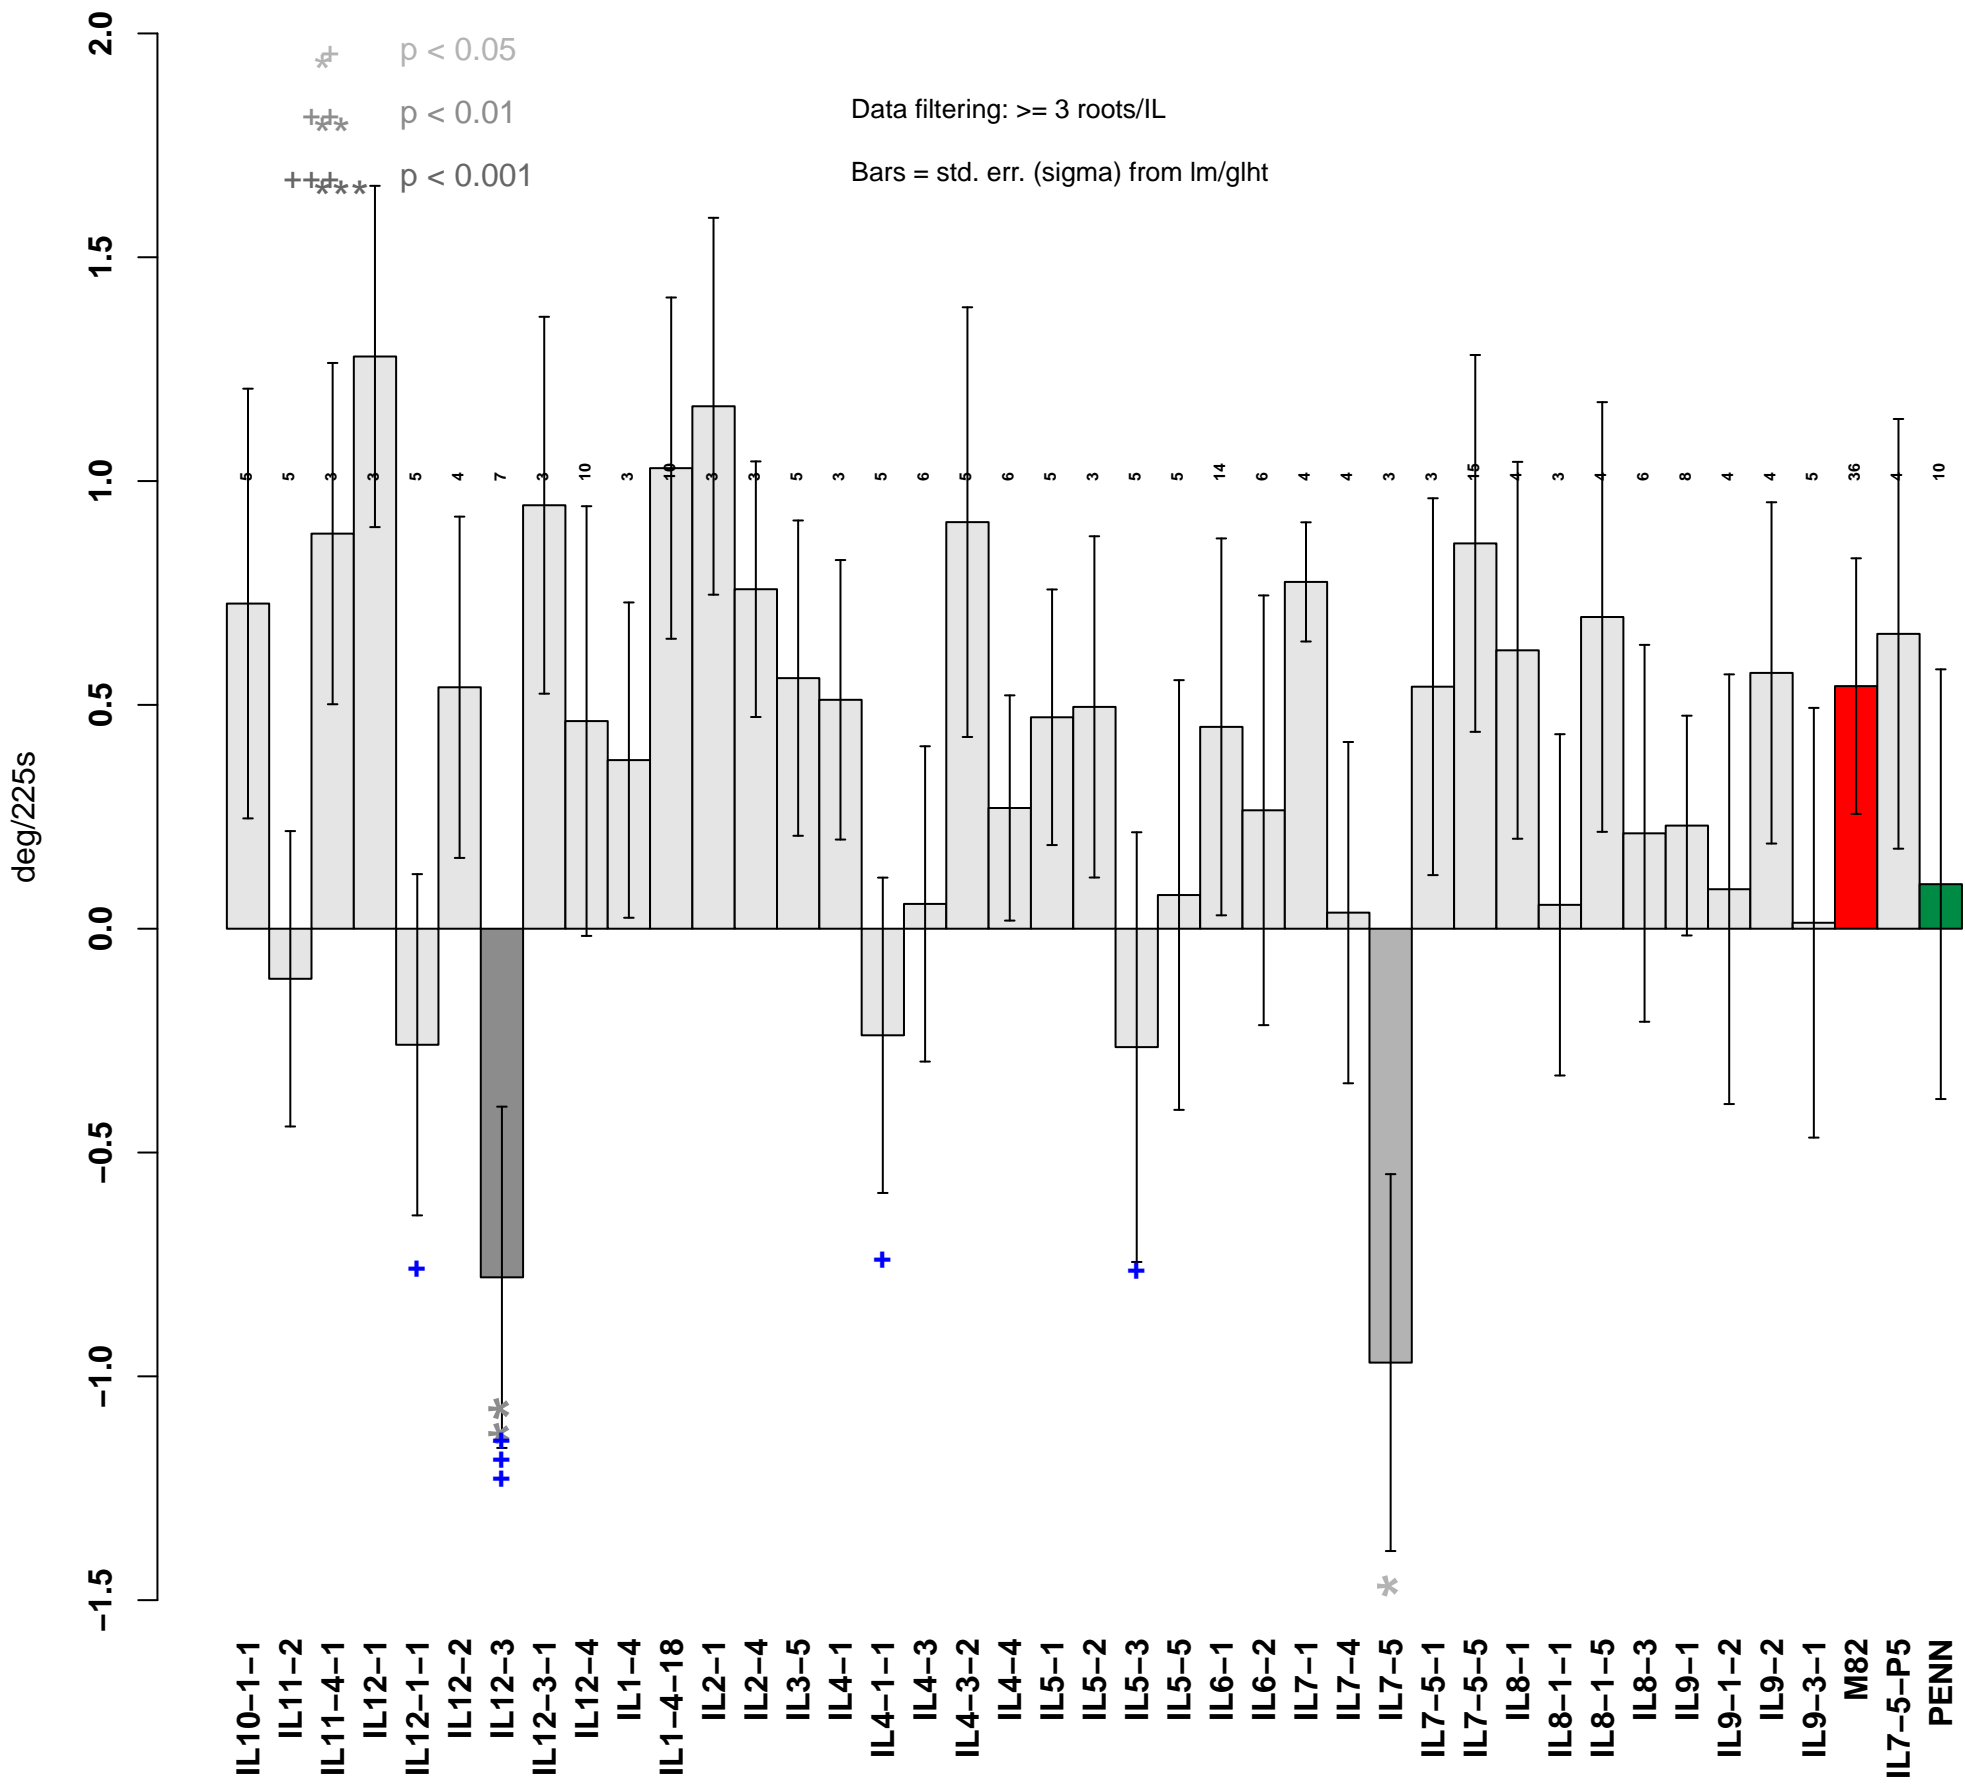

Angle Rate Thru T22

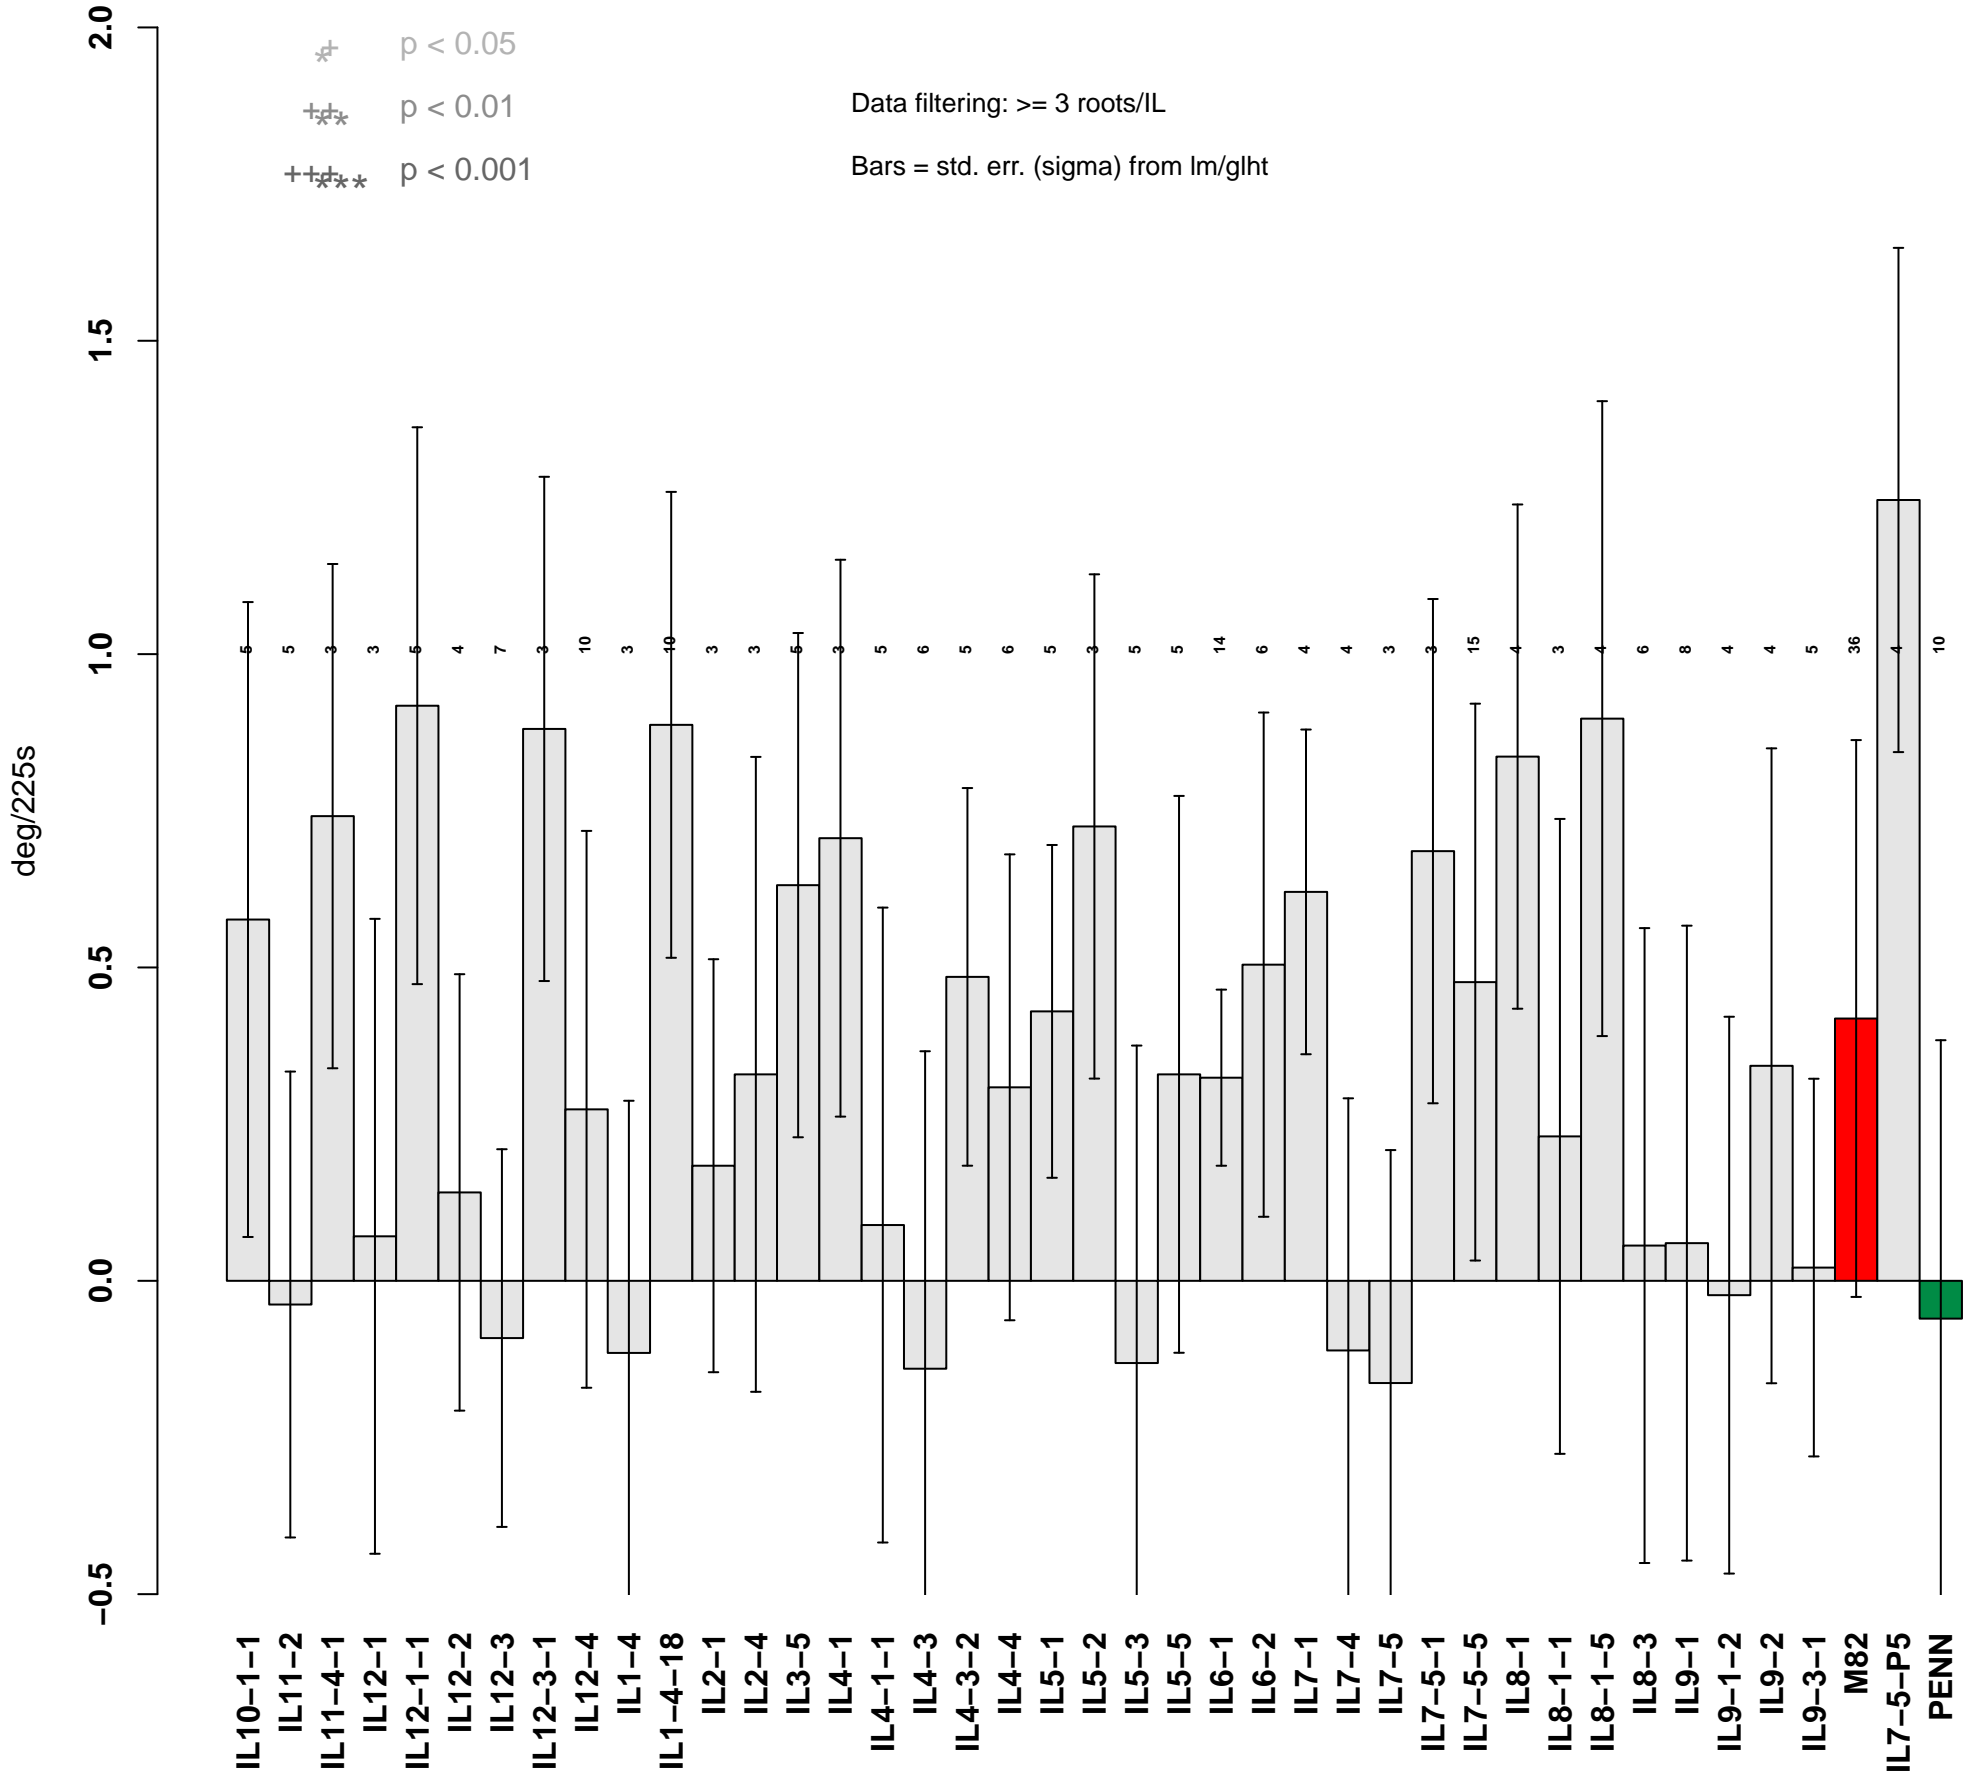

# Angle Rate Thru T23

deg/225s

1.5  
1.0  
0.5  
0.0  
-0.5  
-1.0

\*  
+\*  
++\*  
p < 0.05  
p < 0.01  
p < 0.001

Data filtering: >= 3 roots/IL

Bars = std. err. (sigma) from lm/glht

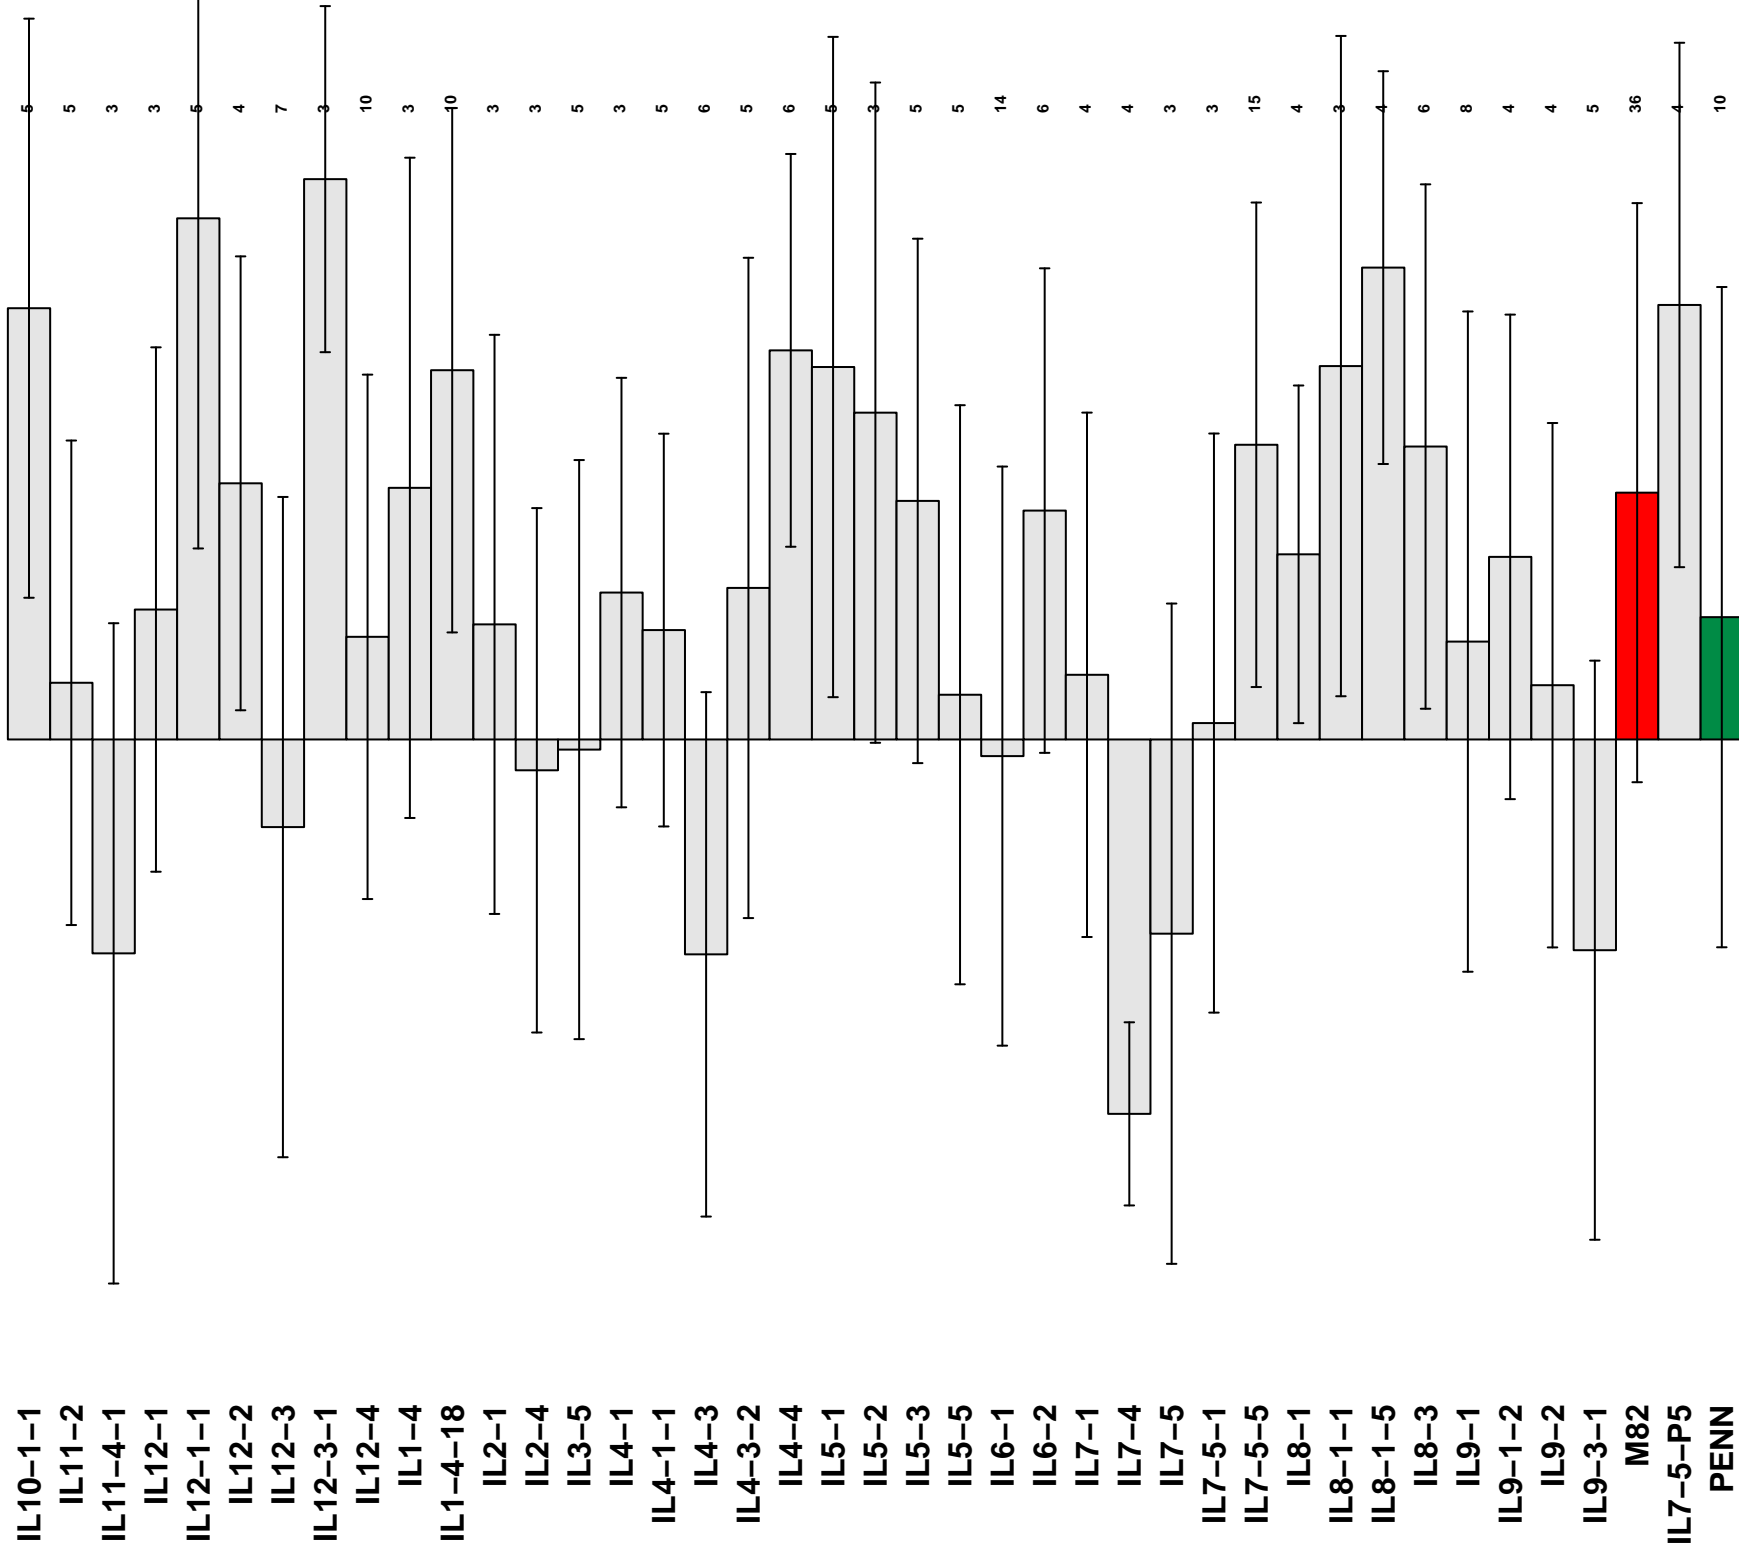

# Angle Rate Thru T24

deg/225s

1.5  
1.0  
0.5  
0.0  
-0.5  
-1.0

\* p < 0.05  
+\* p < 0.01  
++\* p < 0.001

Data filtering: >= 3 roots/IL

Bars = std. err. (sigma) from lm/glht

IL10-1-1  
IL11-2  
IL11-4-1  
IL12-1  
IL12-1-1  
IL12-2  
IL12-3  
IL12-3-1  
IL12-4  
IL1-4  
IL1-4-18  
IL2-1  
IL2-4  
IL3-5  
IL4-1  
IL4-1-1  
IL4-3  
IL4-3-2  
IL4-4  
IL5-1  
IL5-2  
IL5-3  
IL5-5  
IL6-1  
IL6-2  
IL7-1  
IL7-4  
IL7-5  
IL7-5-1  
IL7-5-5  
IL8-1  
IL8-1-1  
IL8-1-5  
IL8-3  
IL9-1  
IL9-1-2  
IL9-2  
IL9-3-1  
M82  
IL7-5-P5  
PENN

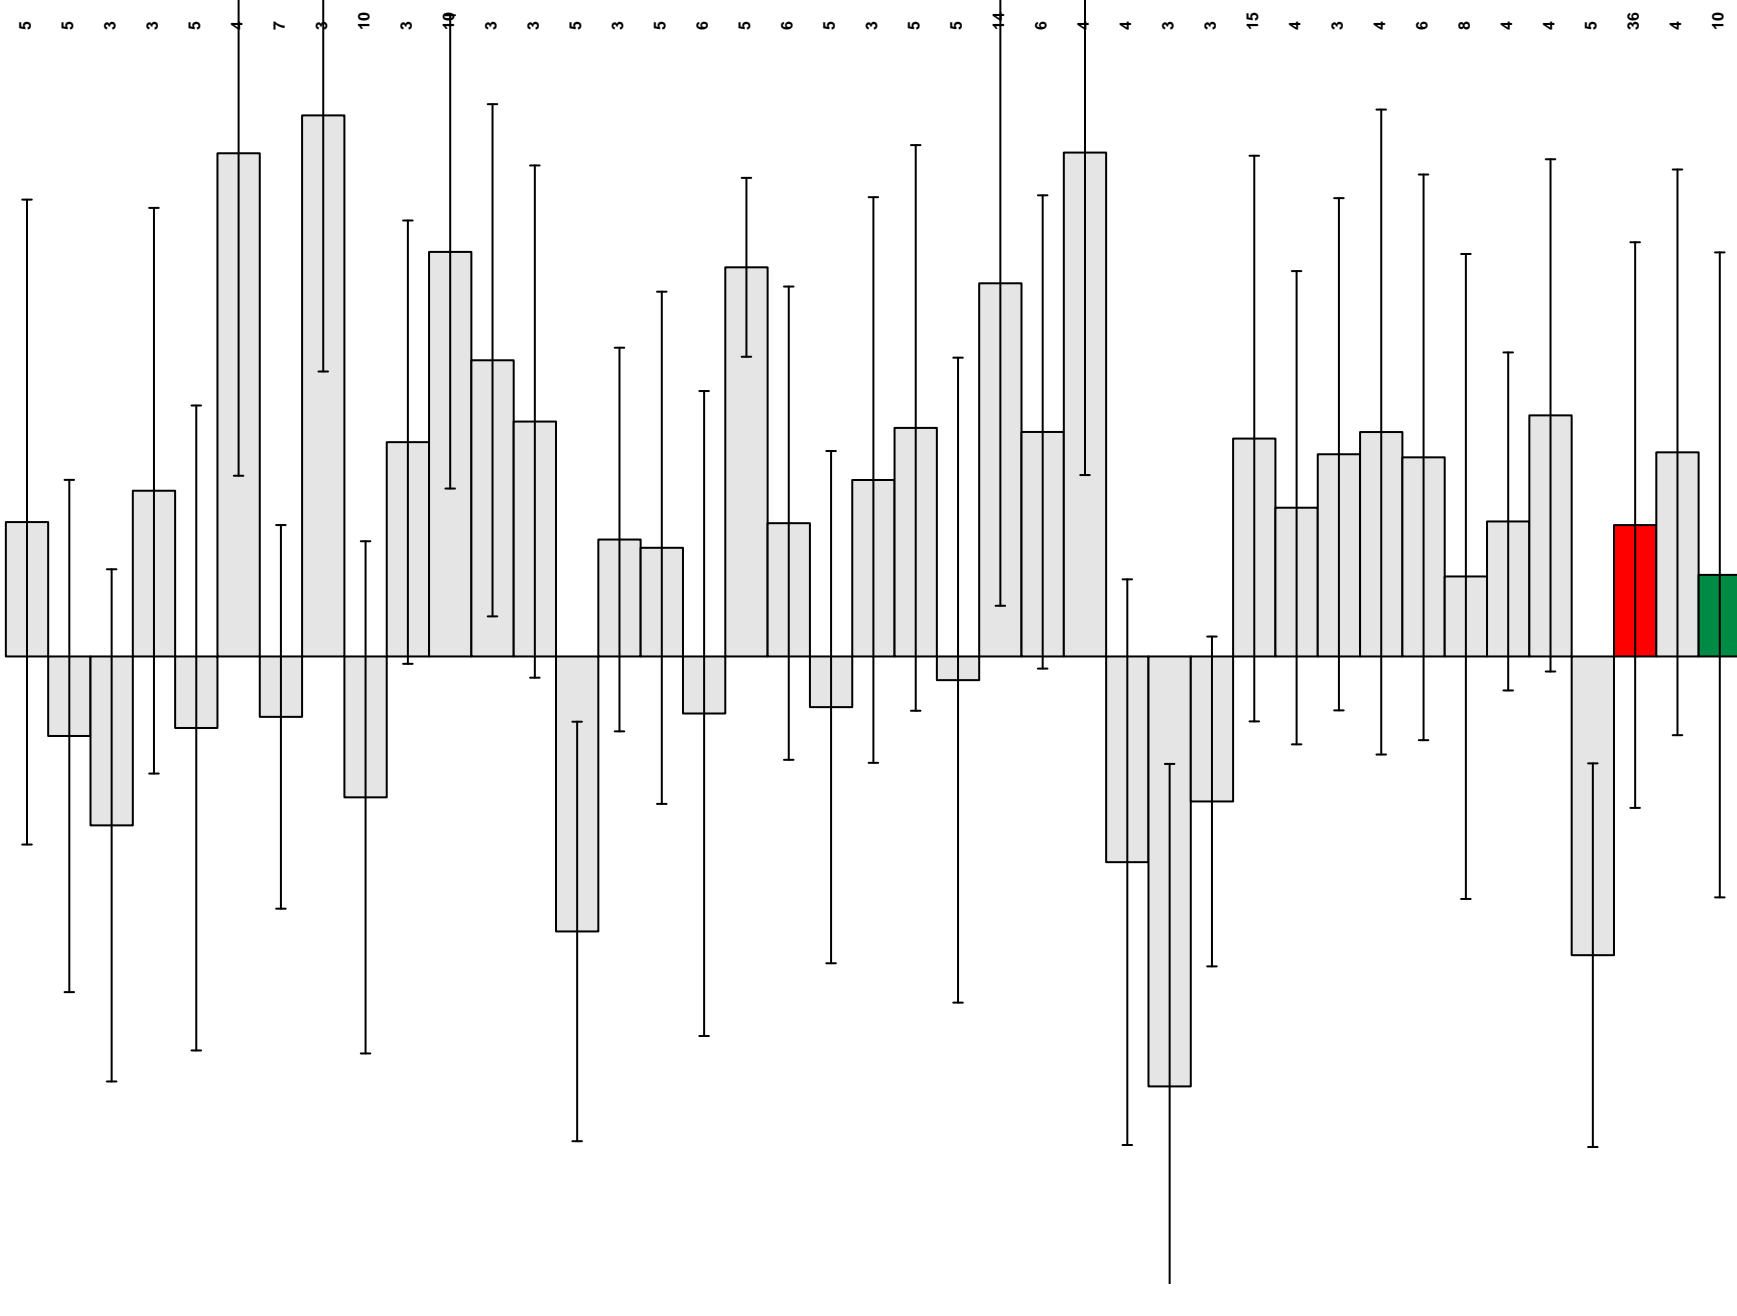

# Angle Rate Thru T25

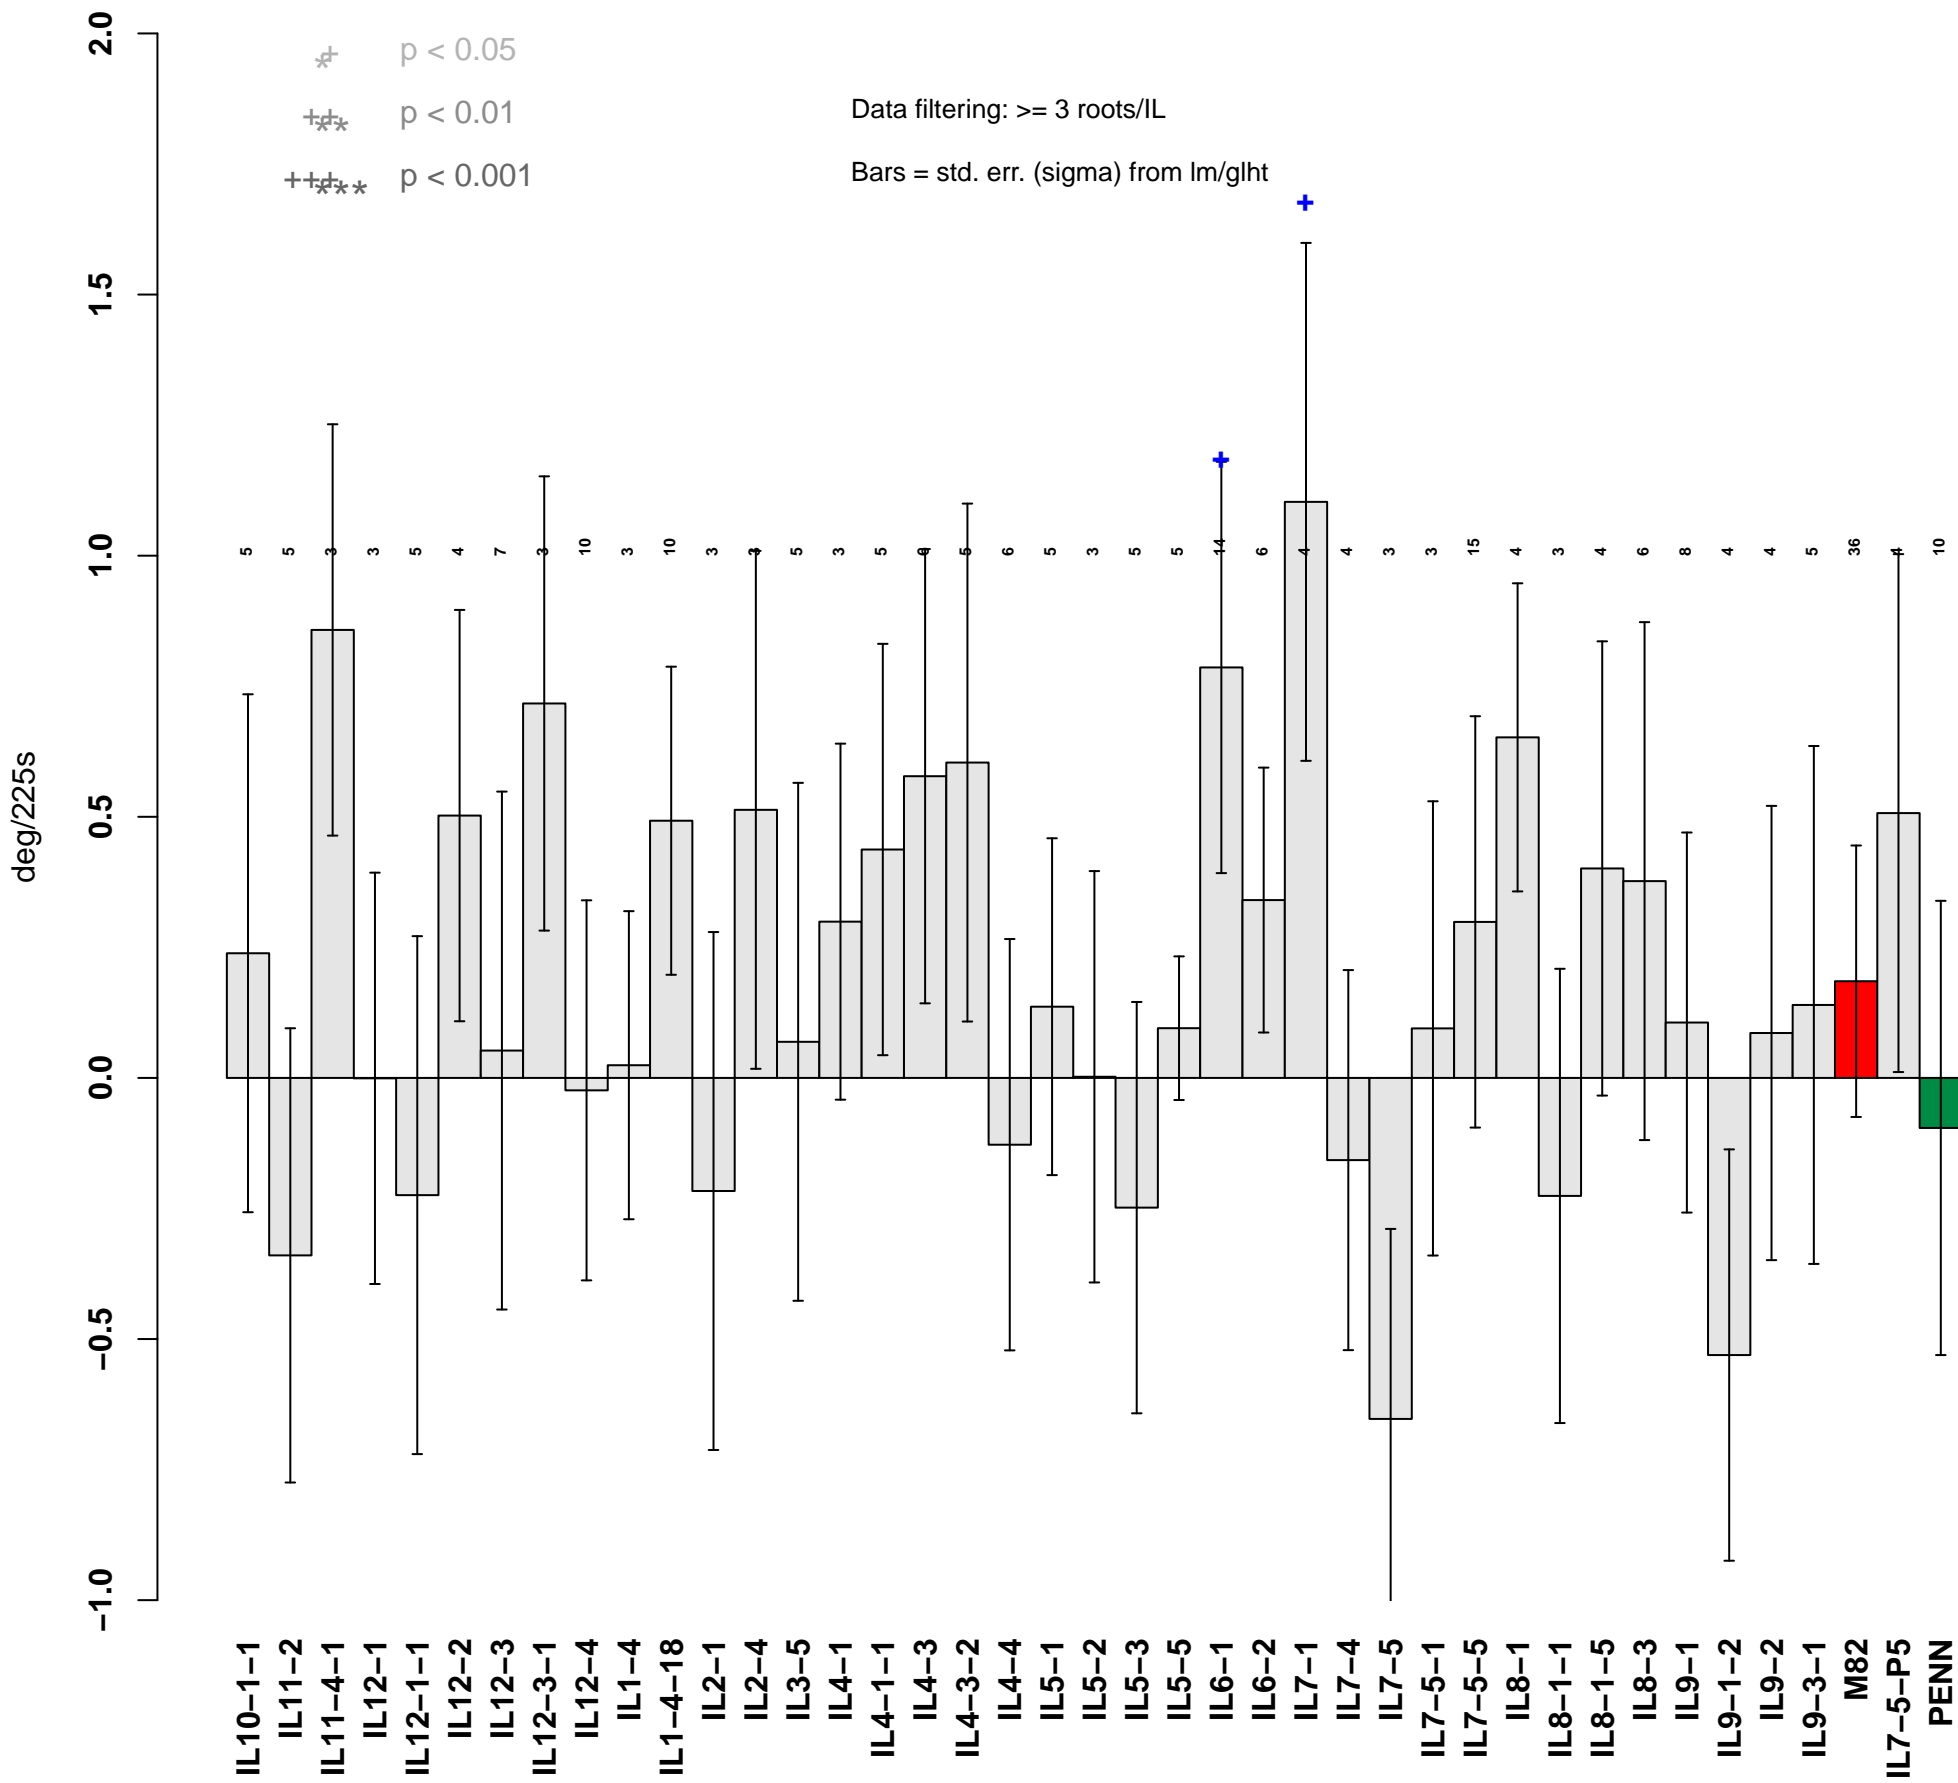

# Angle Rate Thru T26

deg/225s

1.5  
1.0  
0.5  
0.0  
-0.5  
-1.0

+\* p < 0.05  
+\*+\* p < 0.01  
+\*+\*+\* p < 0.001

Data filtering: >= 3 roots/IL

Bars = std. err. (sigma) from lm/glht

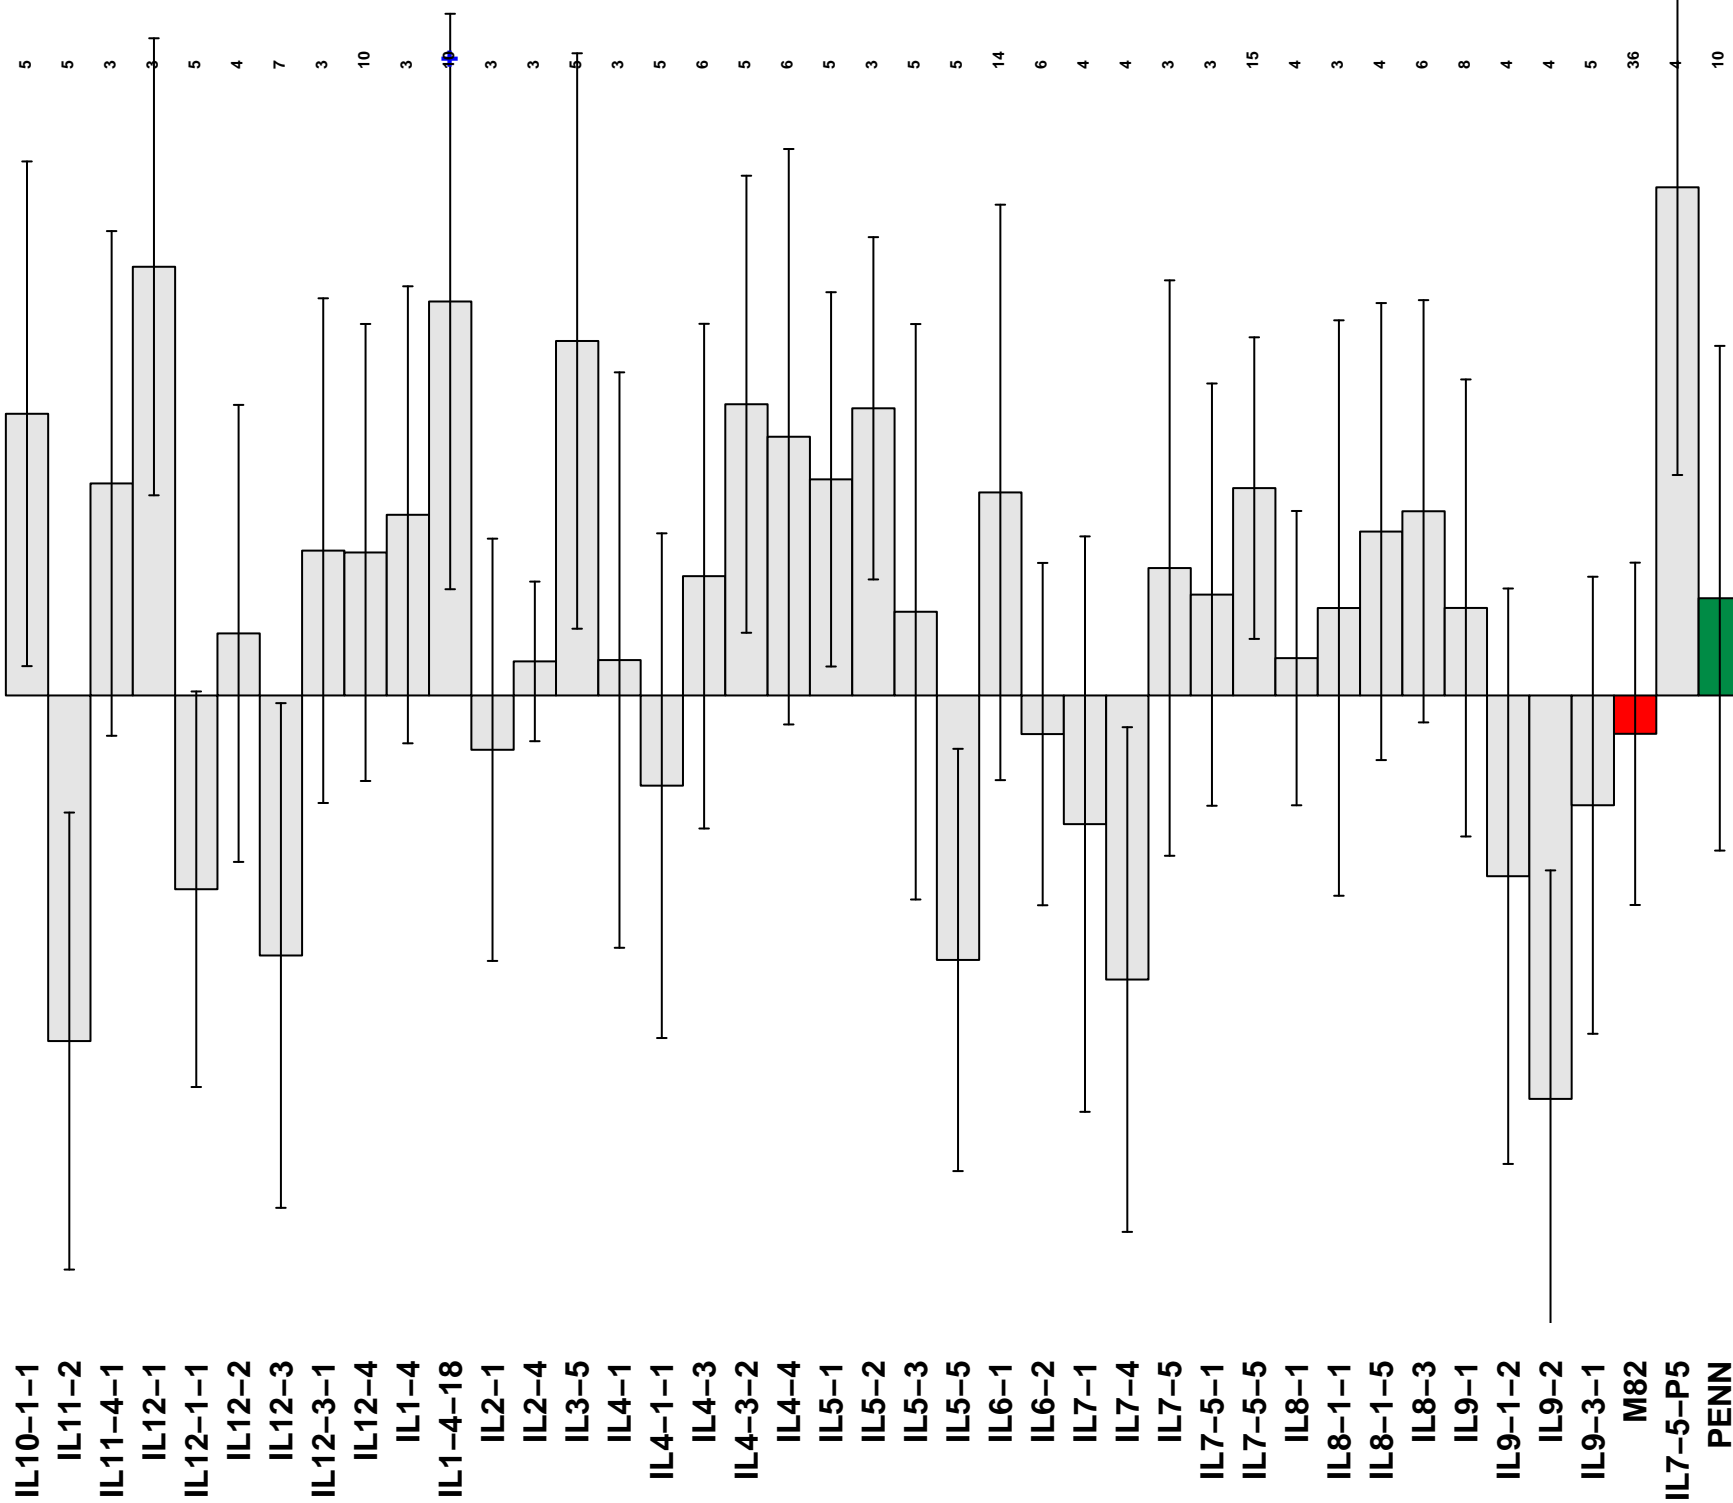

# Angle Rate Thru T27

deg/225s

-1.5  
-1.0  
-0.5  
0.0  
0.5  
1.0  
1.5

+\* p < 0.05  
+\*+\* p < 0.01  
+\*+\*+\* p < 0.001

Data filtering: >= 3 roots/IL

Bars = std. err. (sigma) from lm/glht

IL10-1-1  
IL11-2  
IL11-4-1  
IL12-1  
IL12-1-1  
IL12-2  
IL12-3  
IL12-3-1  
IL12-4  
IL1-4  
IL1-4-18  
IL2-1  
IL2-4  
IL3-5  
IL4-1  
IL4-1-1  
IL4-3  
IL4-3-2  
IL4-4  
IL5-1  
IL5-2  
IL5-3  
IL5-5  
IL6-1  
IL6-2  
IL7-1  
IL7-4  
IL7-5  
IL7-5-1  
IL7-5-5  
IL8-1  
IL8-1-1  
IL8-1-5  
IL8-3  
IL9-1  
IL9-1-2  
IL9-2  
IL9-3-1  
M82  
IL7-5-P5  
PENN

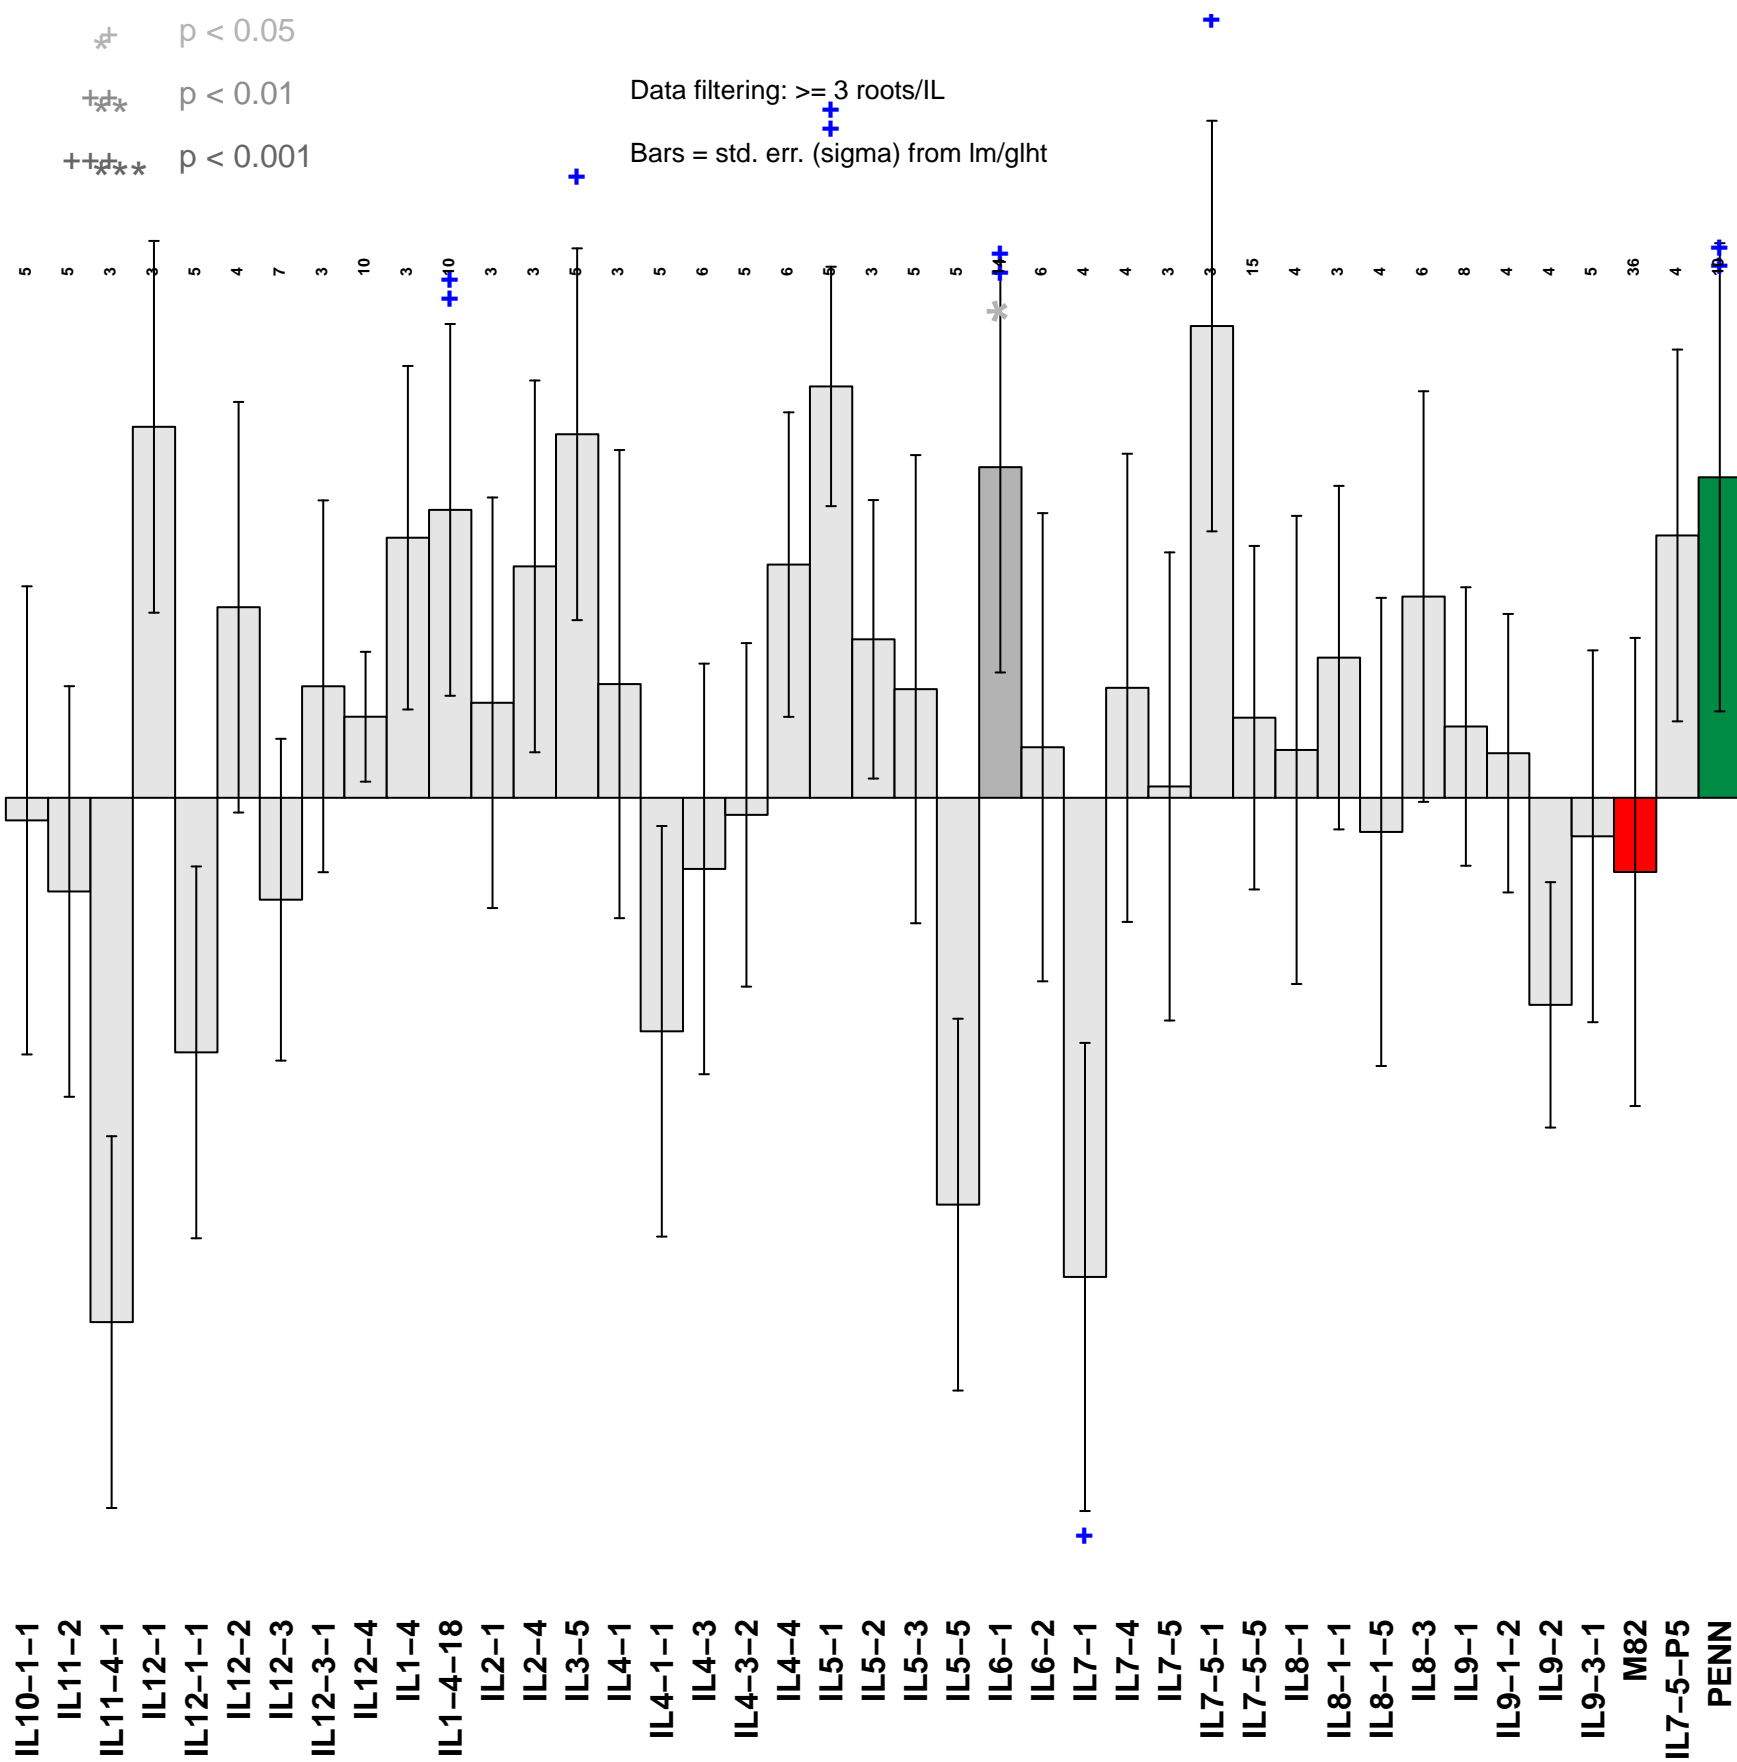

# Angle Rate Thru T28

deg/225s

1.5  
1.0  
0.5  
0.0  
-0.5  
-1.0

\* p < 0.05  
+\* p < 0.01  
++\* p < 0.001

Data filtering: >= 3 roots/IL

Bars = std. err. (sigma) from lm/glht

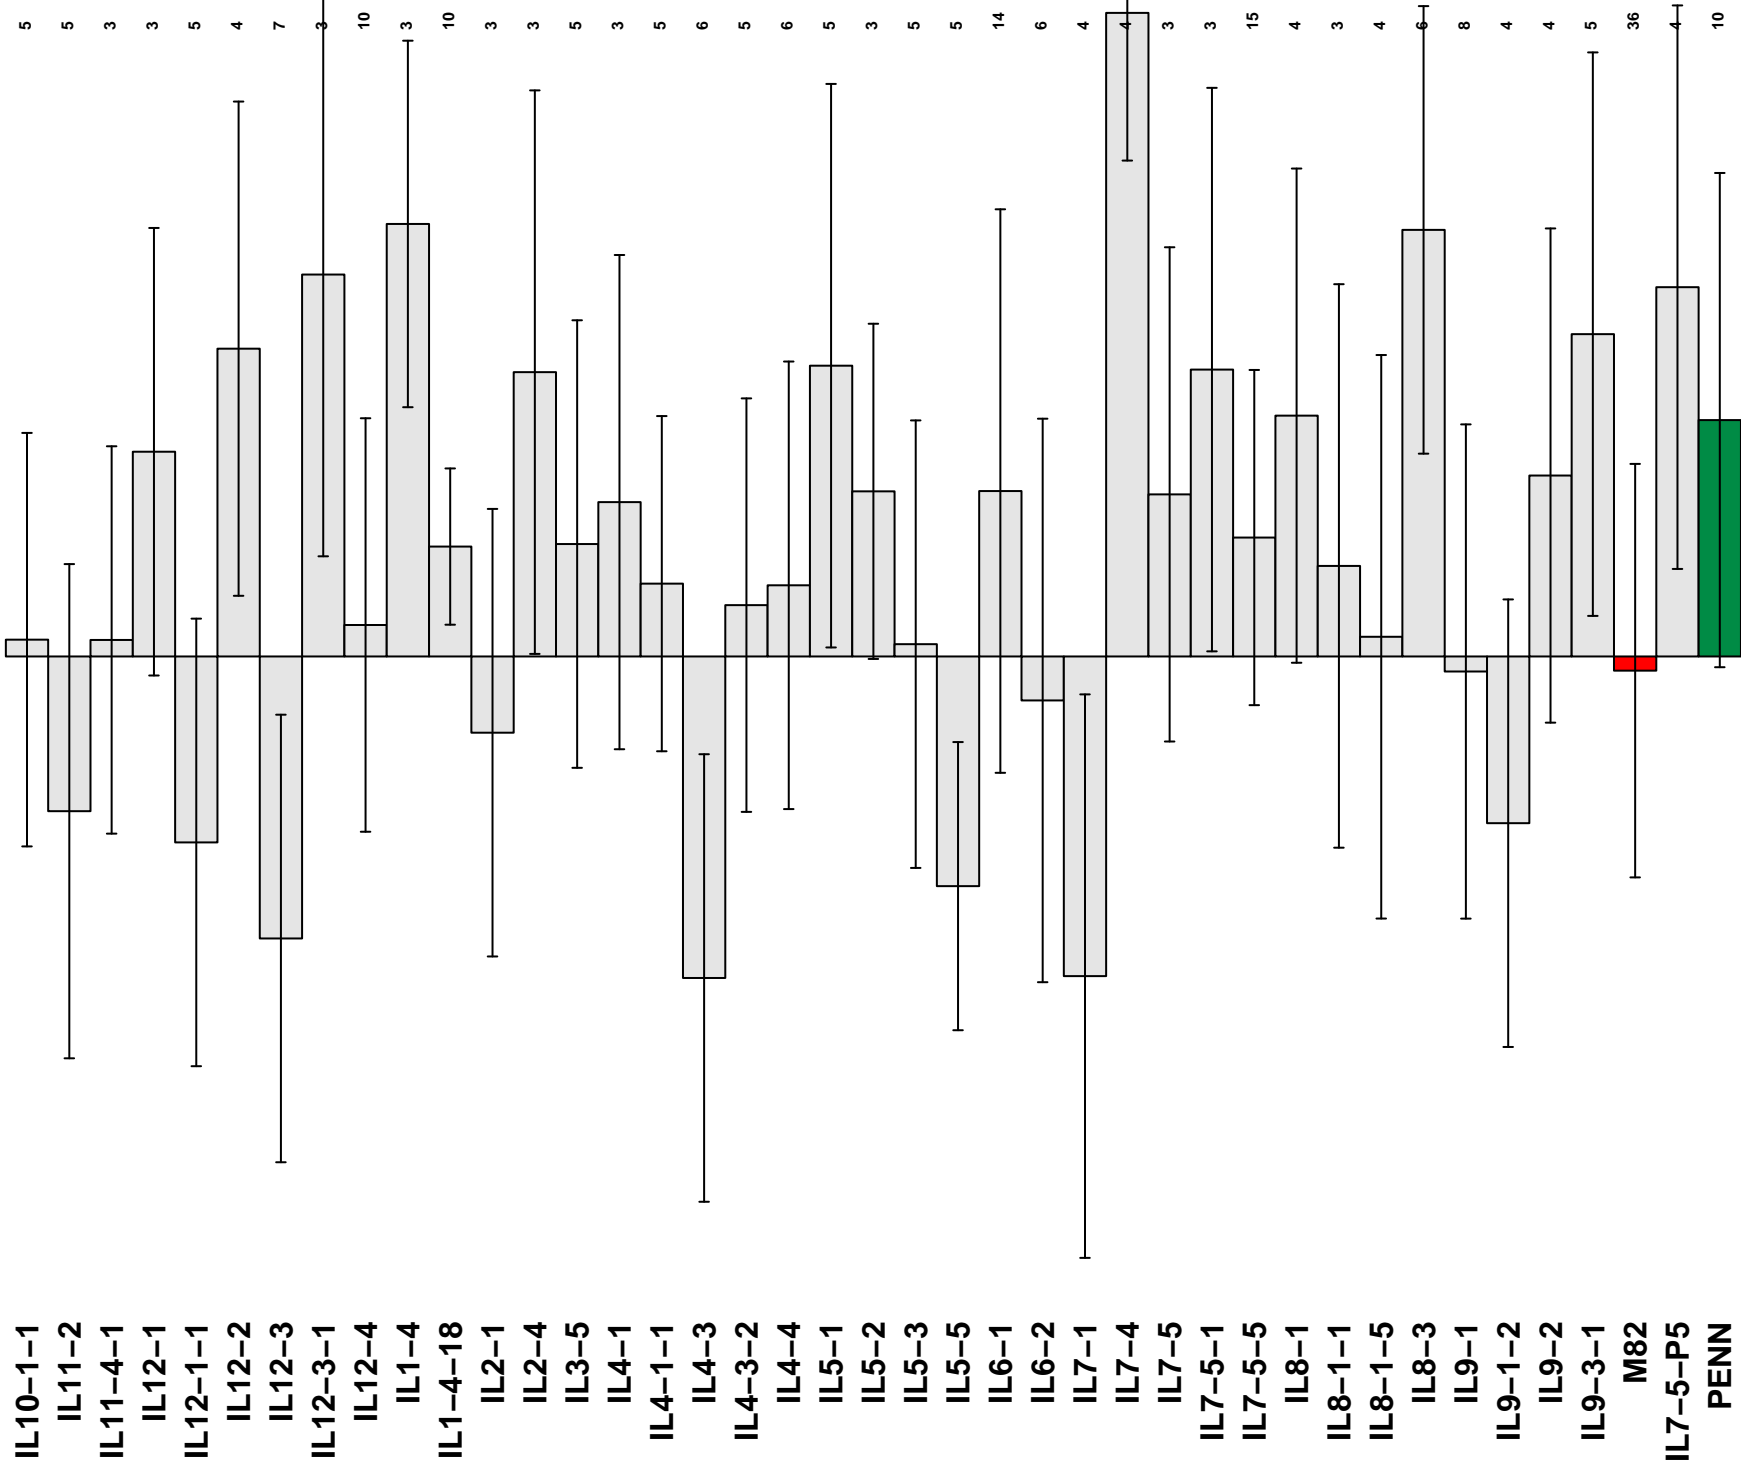

# Angle Rate Thru T29

deg/225s

-1.0 -0.5 0.0 0.5 1.0 1.5 2.0

$\ast$   $p < 0.05$   
 $\ast\ast$   $p < 0.01$   
 $\ast\ast\ast$   $p < 0.001$

Data filtering:  $\geq 3$  roots/IL

Bars = std. err. (sigma) from lm/glht

IL10-1-1  
 IL11-2  
 IL11-4-1  
 IL12-1  
 IL12-1-1  
 IL12-2  
 IL12-3  
 IL12-3-1  
 IL12-4  
 IL1-4  
 IL1-4-18  
 IL2-1  
 IL2-4  
 IL3-5  
 IL4-1  
 IL4-1-1  
 IL4-3  
 IL4-3-2  
 IL4-4  
 IL5-1  
 IL5-2  
 IL5-3  
 IL5-5  
 IL6-1  
 IL6-2  
 IL7-1  
 IL7-4  
 IL7-5  
 IL7-5-1  
 IL7-5-5  
 IL8-1  
 IL8-1-1  
 IL8-1-5  
 IL8-3  
 IL9-1  
 IL9-1-2  
 IL9-2  
 IL9-3-1  
 M82  
 IL7-5-P5  
 PENN

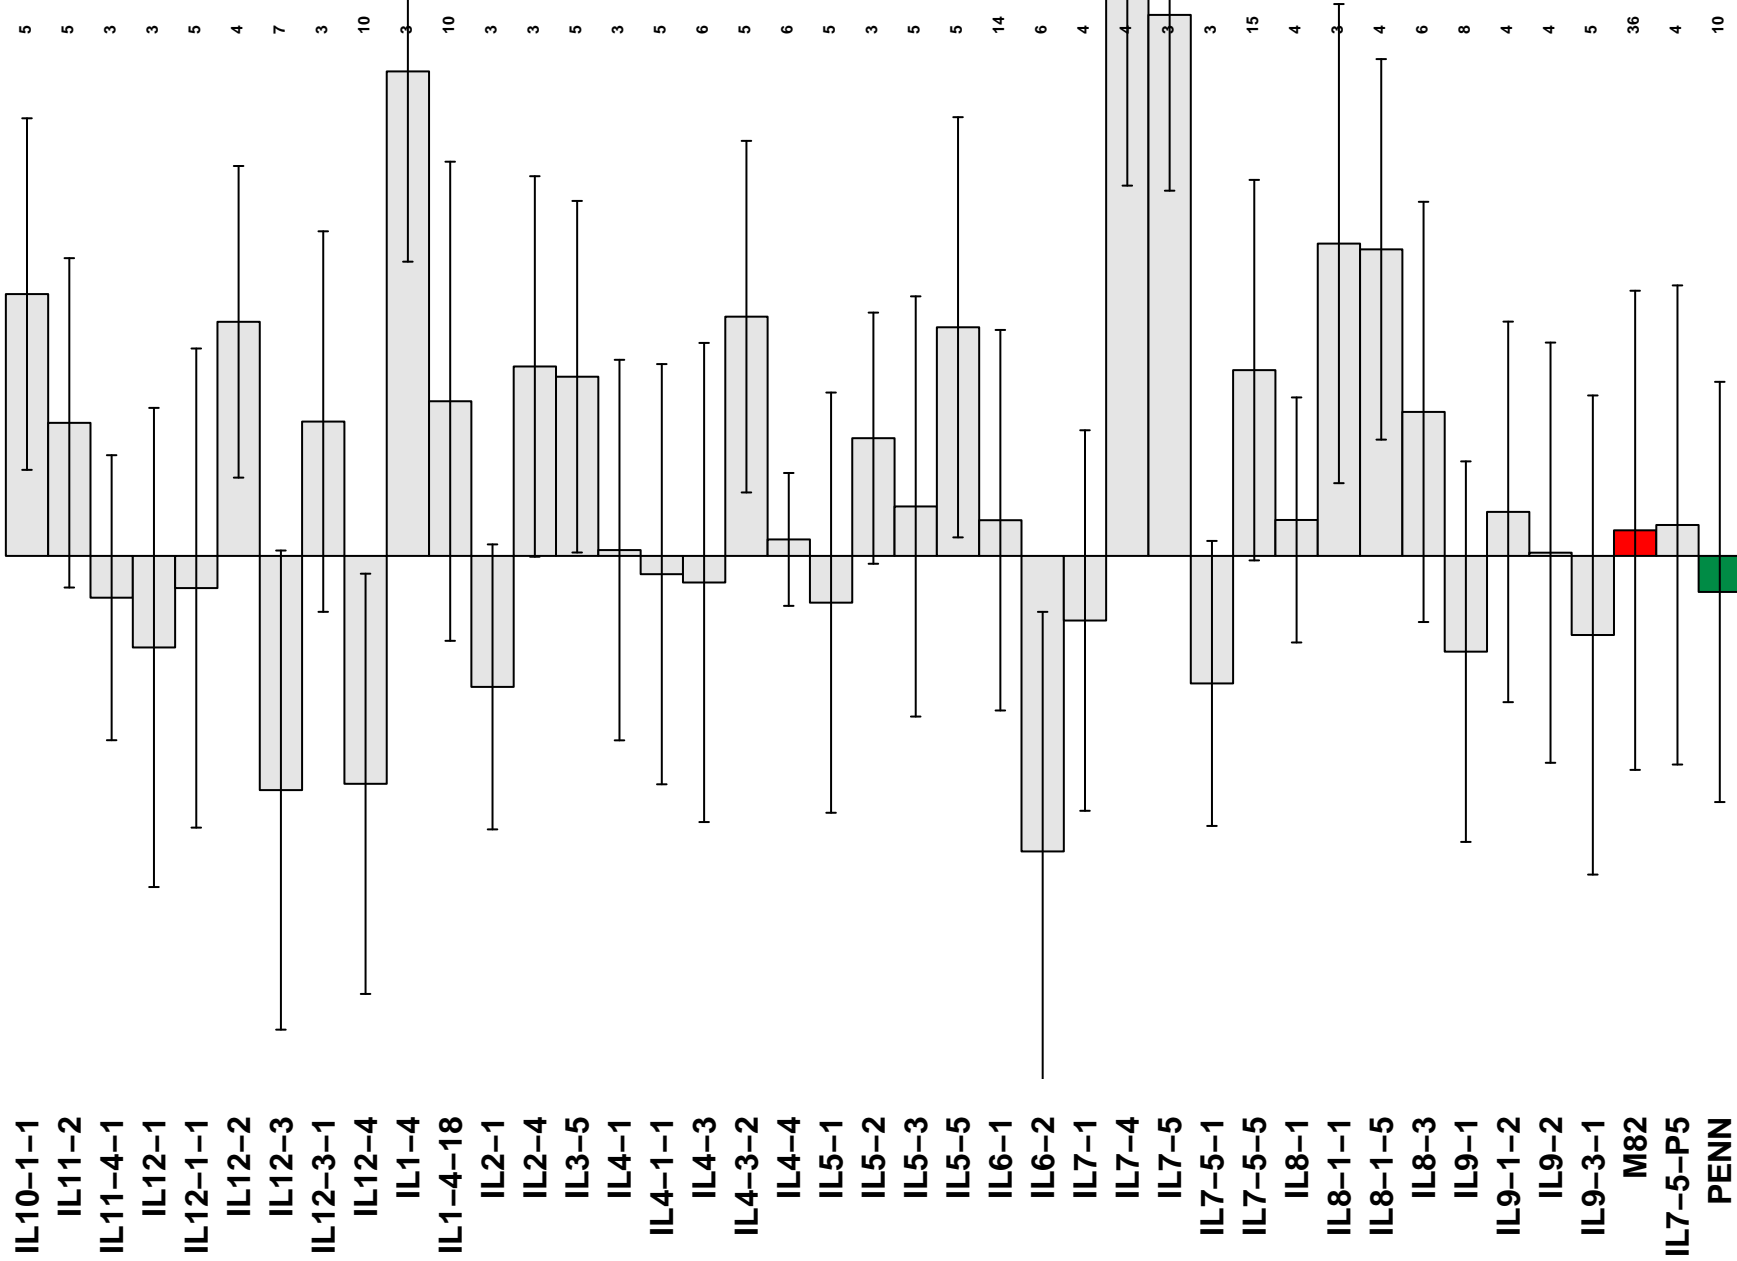

Angle Rate Thru T30

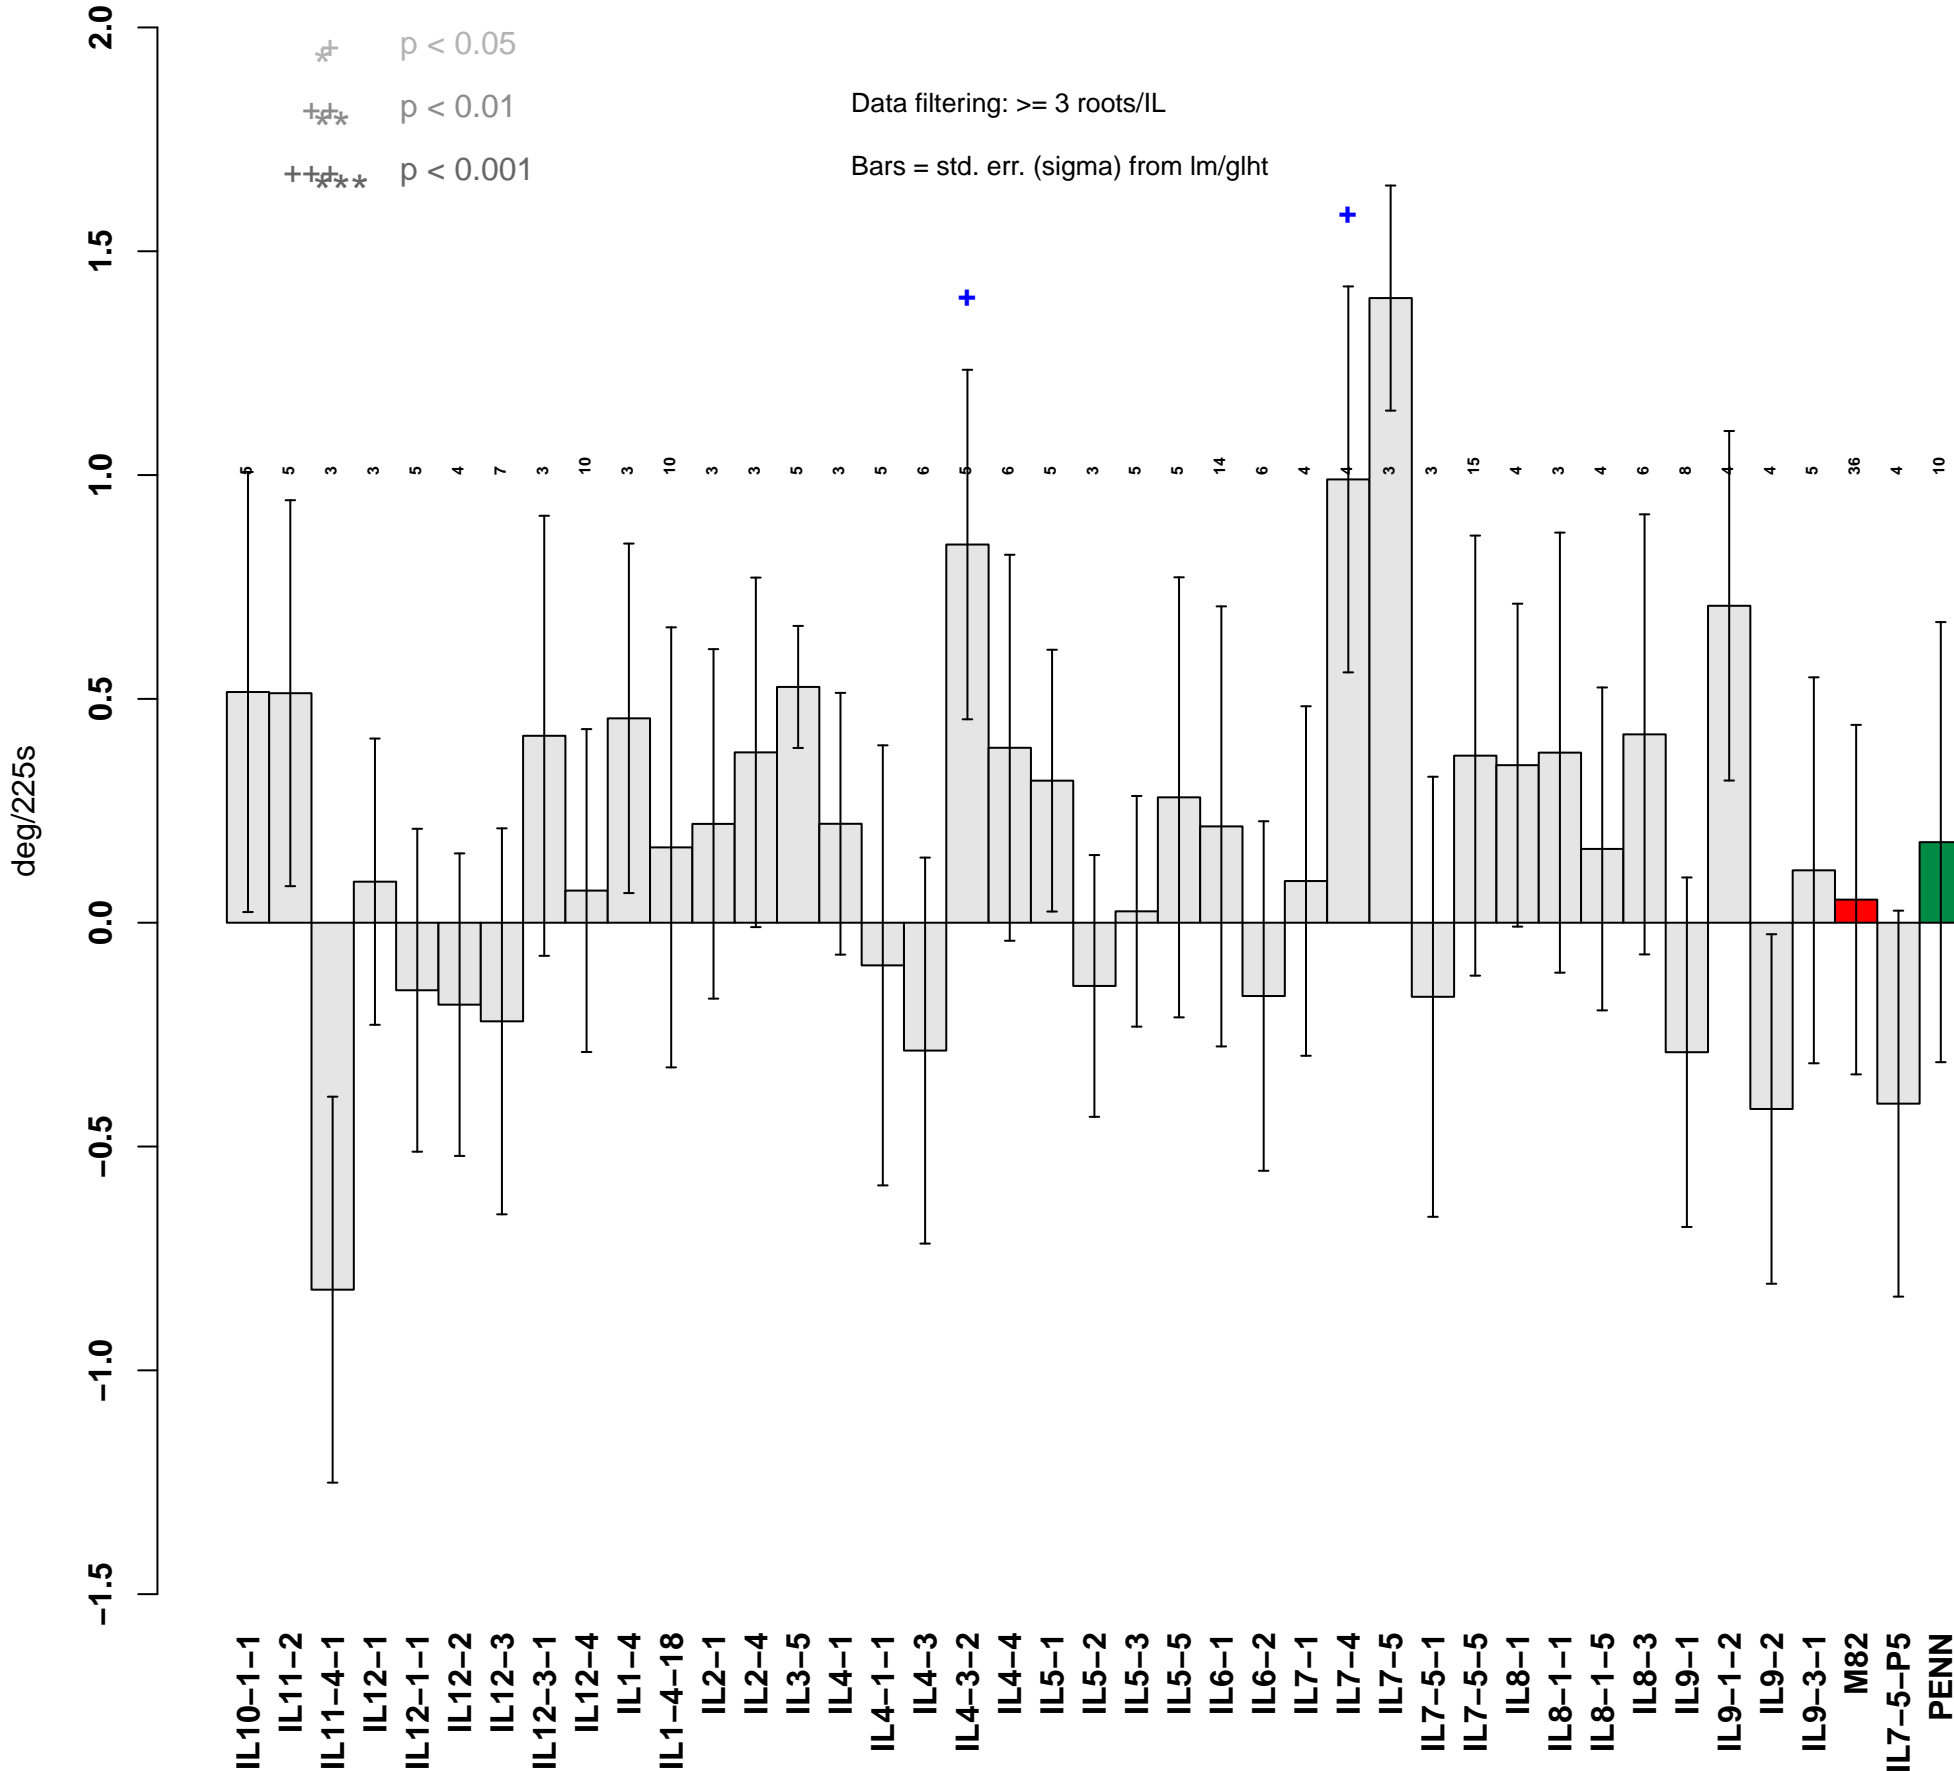

Angle Rate Thru T31

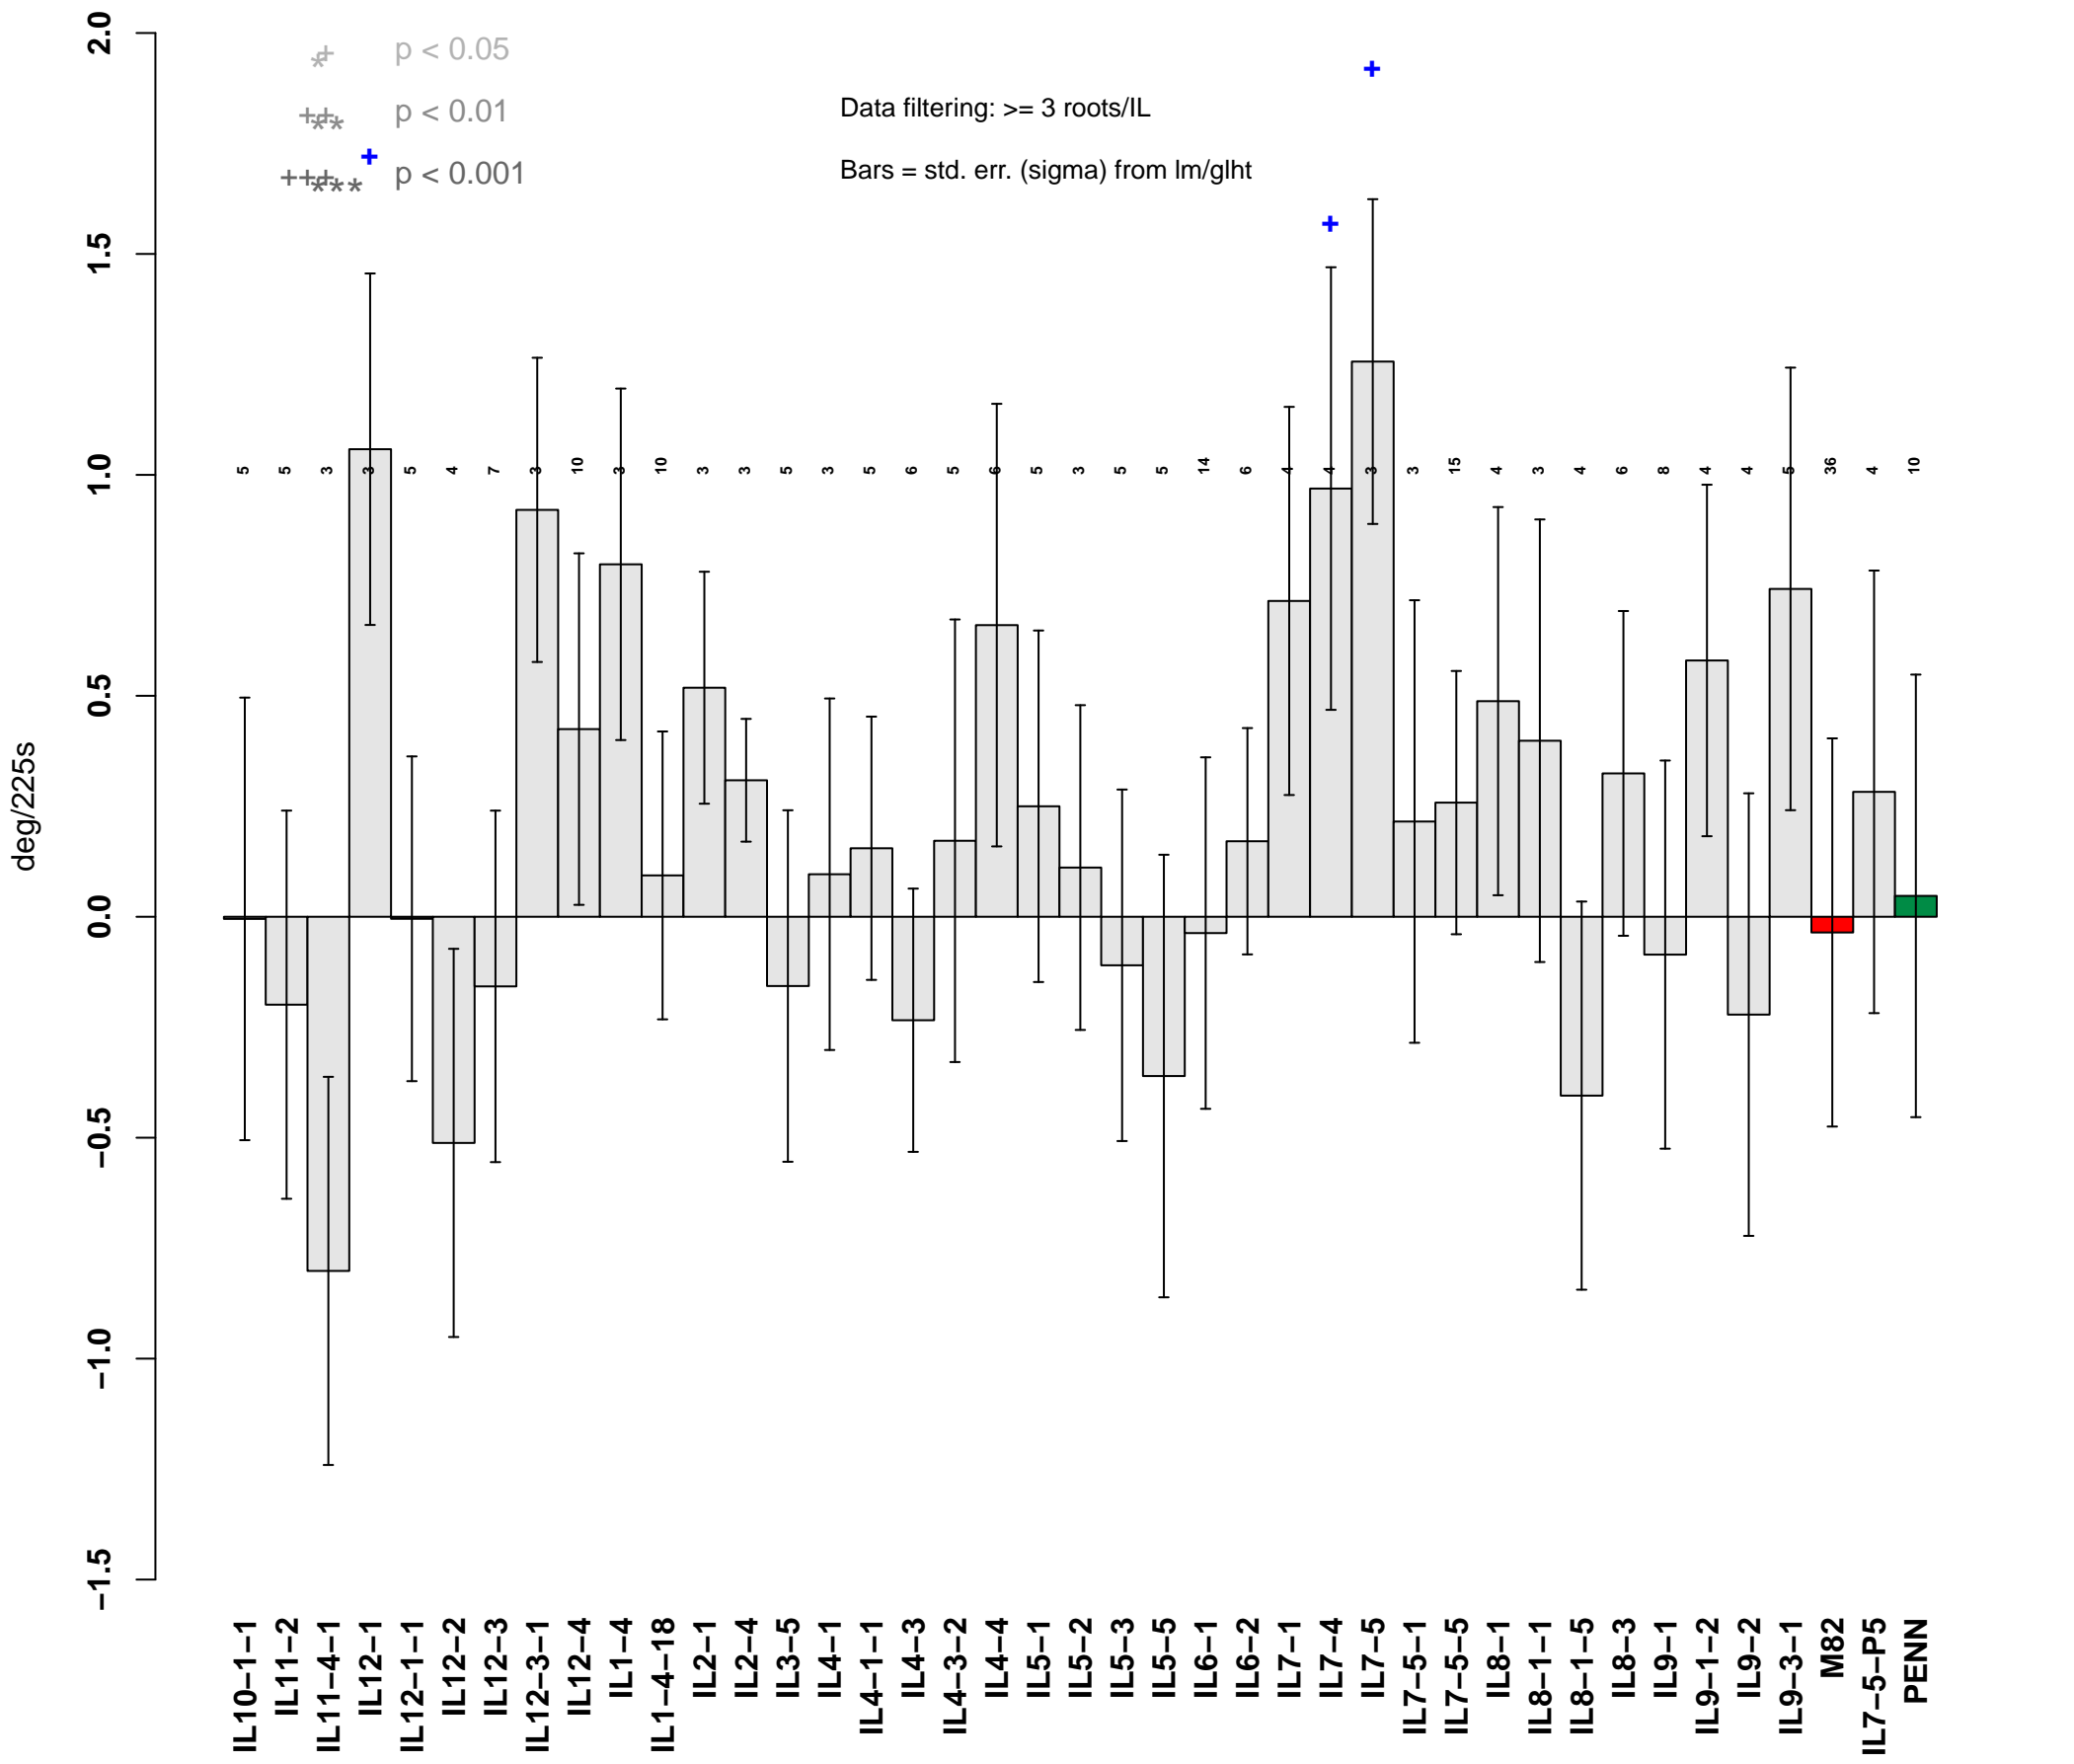

# Angle Rate Thru T32

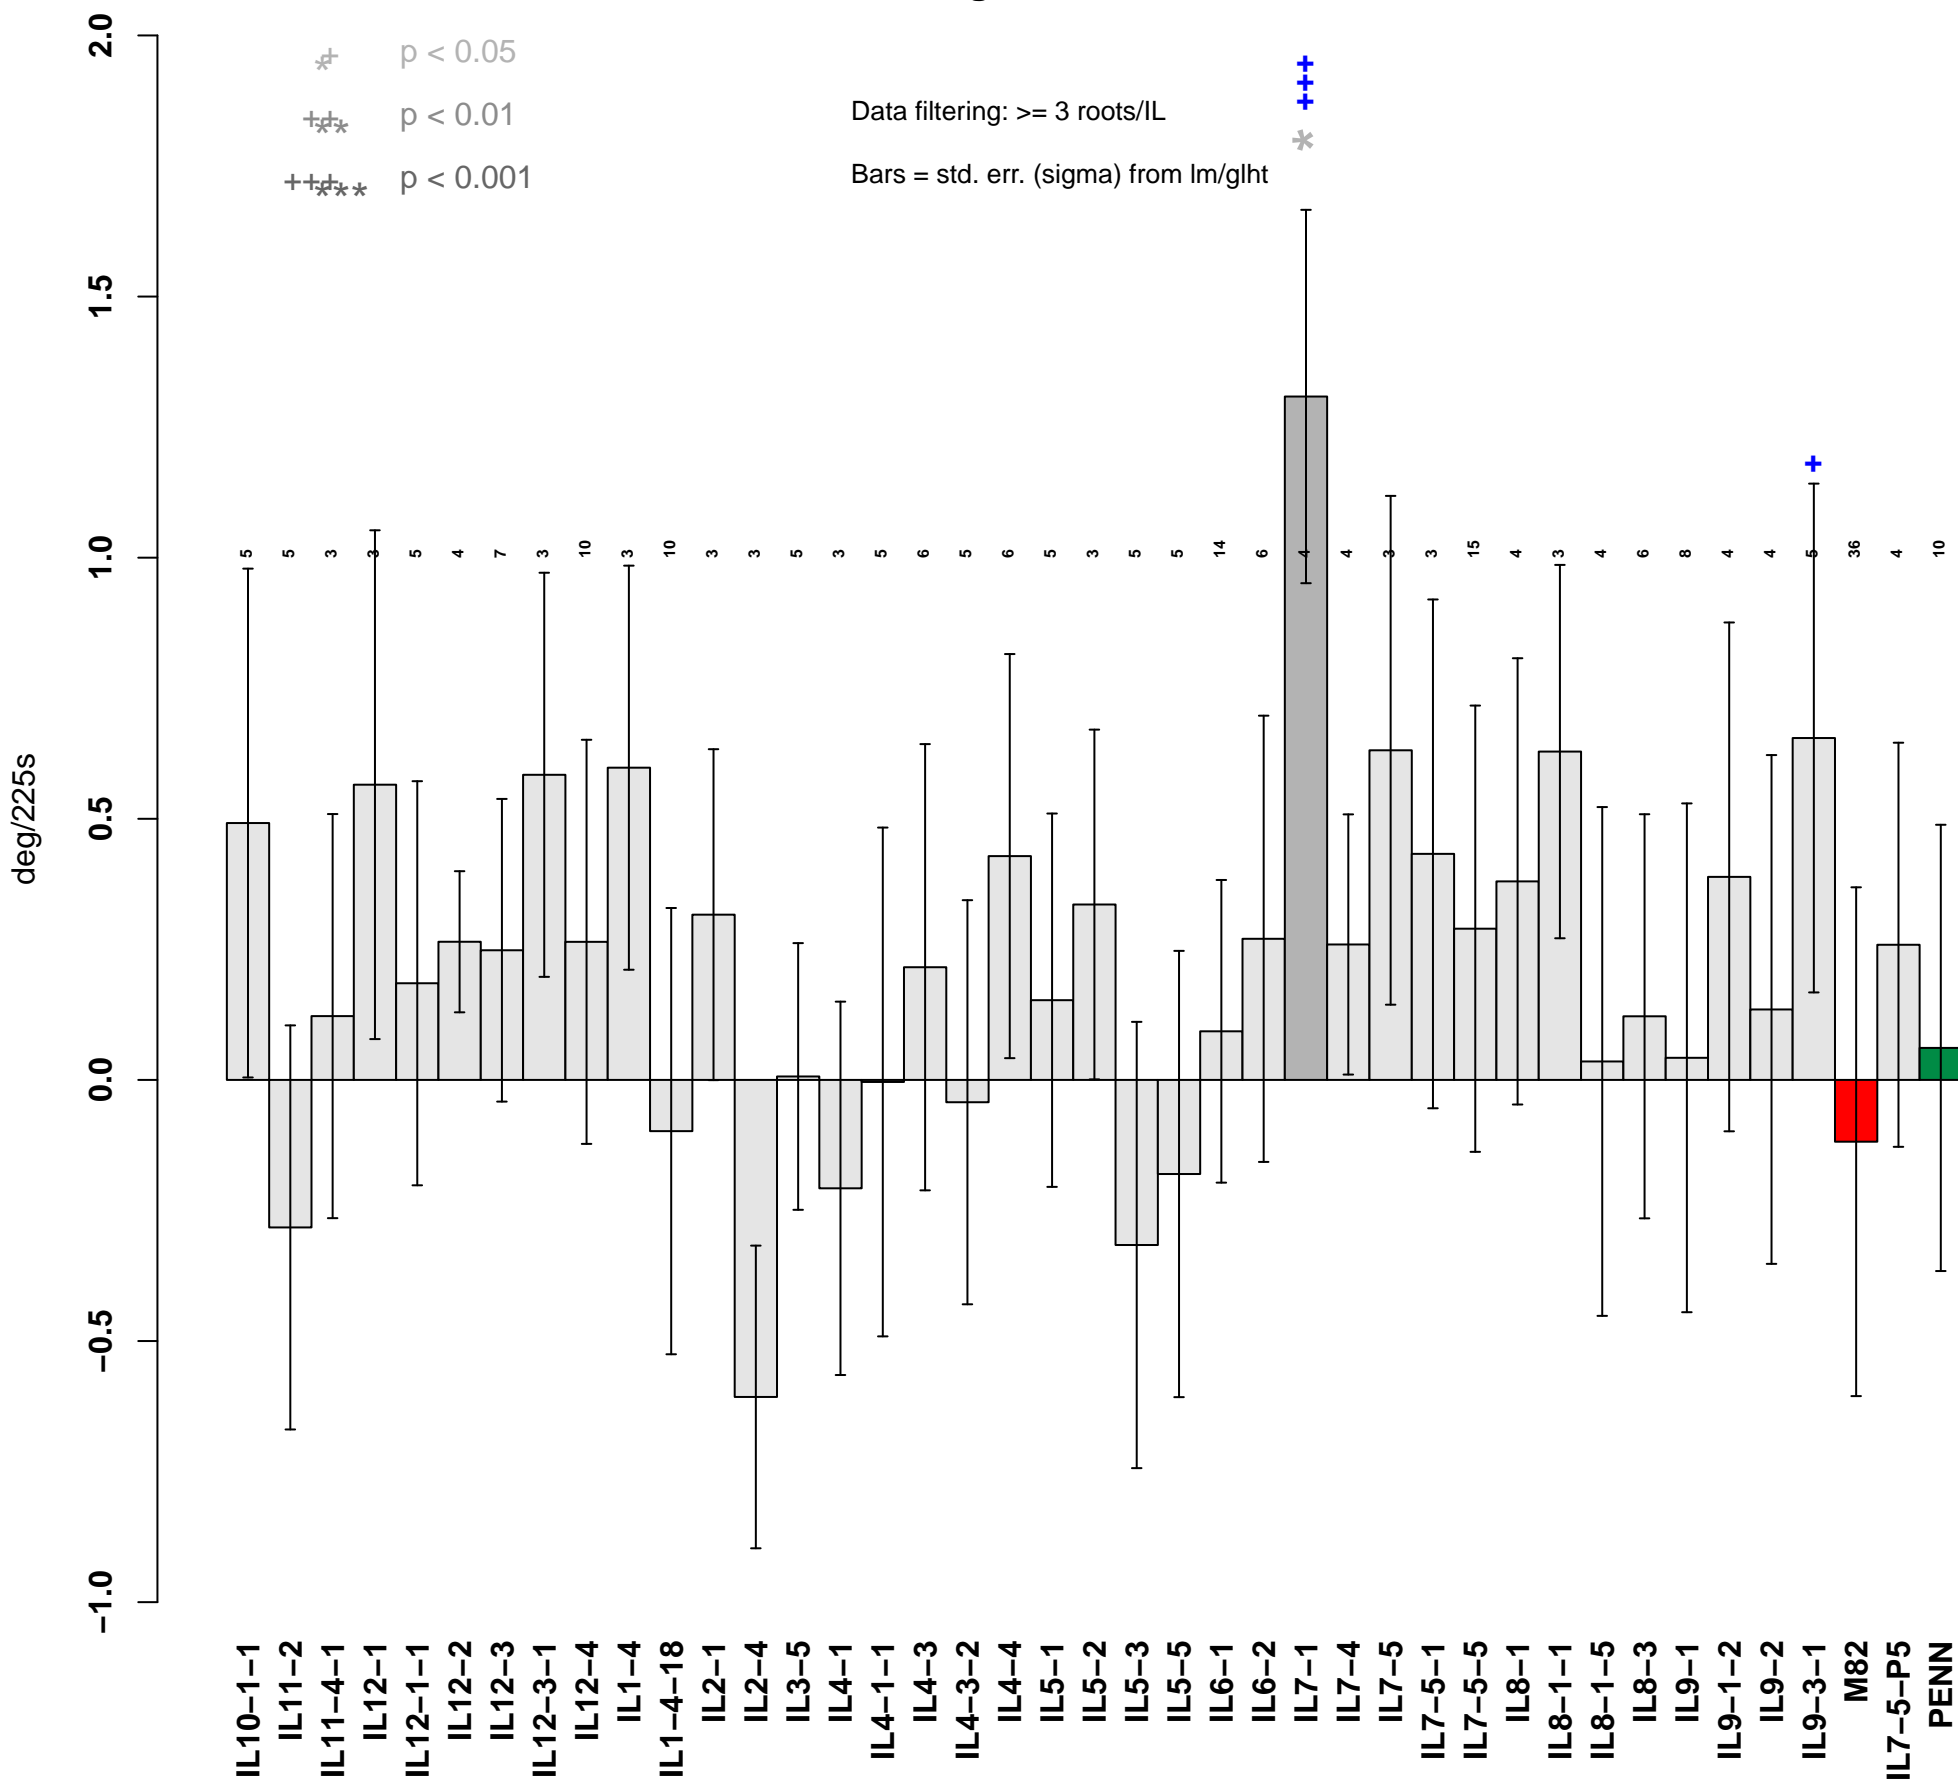

Angle Rate Thru T33

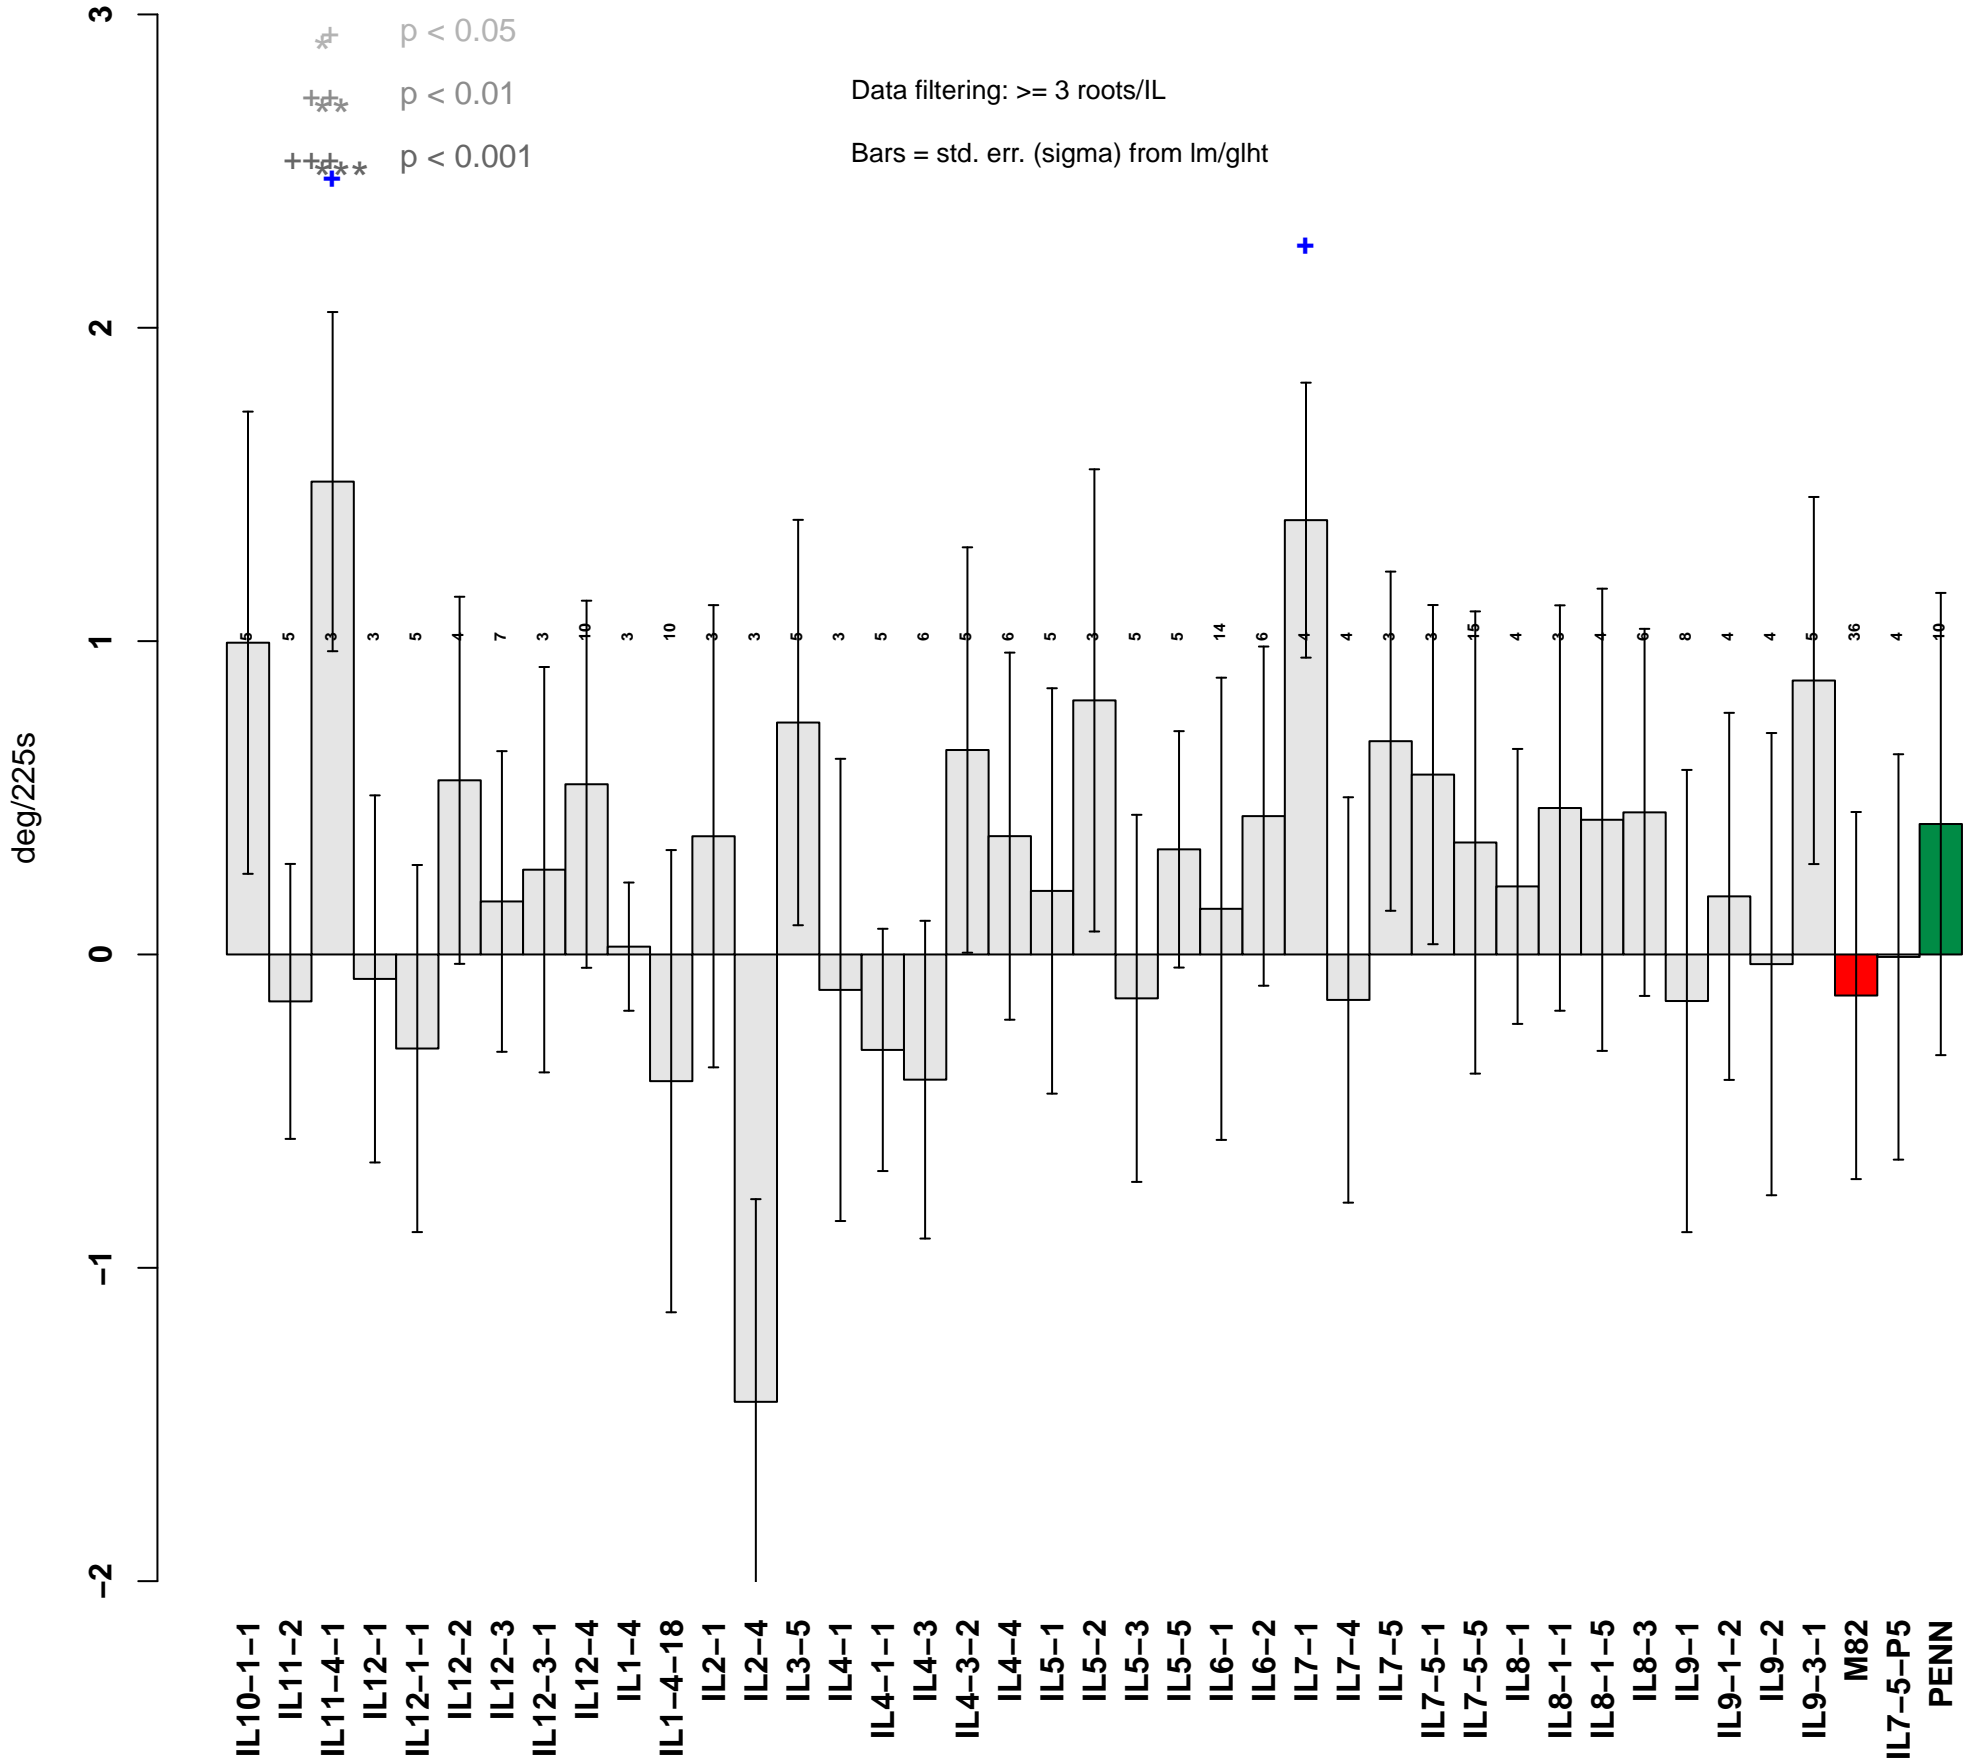

Supplement: Supplementary file 12 [file 2]
