# Supplementary material
Source: publisher figshare collection journal article supplement (https://gsajournals.figshare.com/articles/dataset/_/7237562)

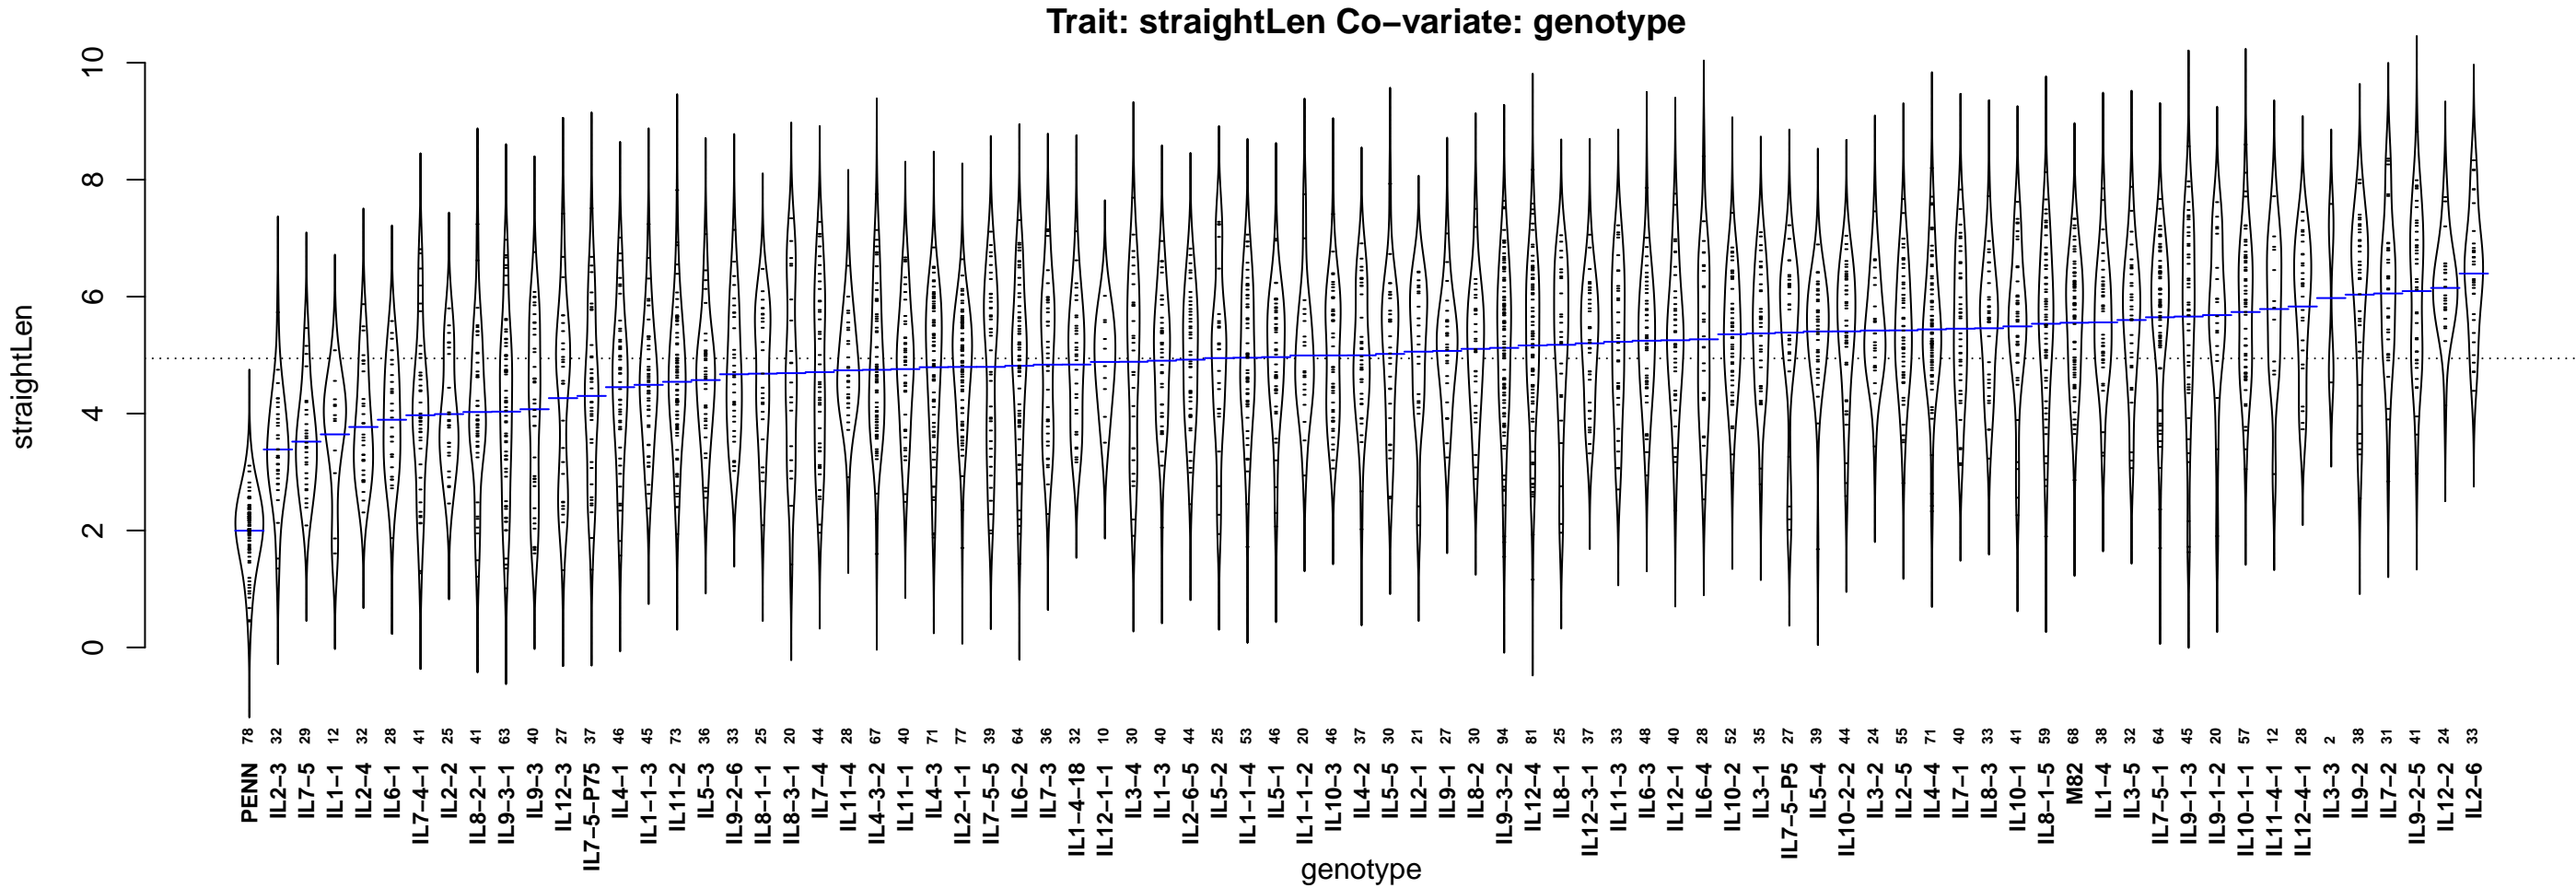

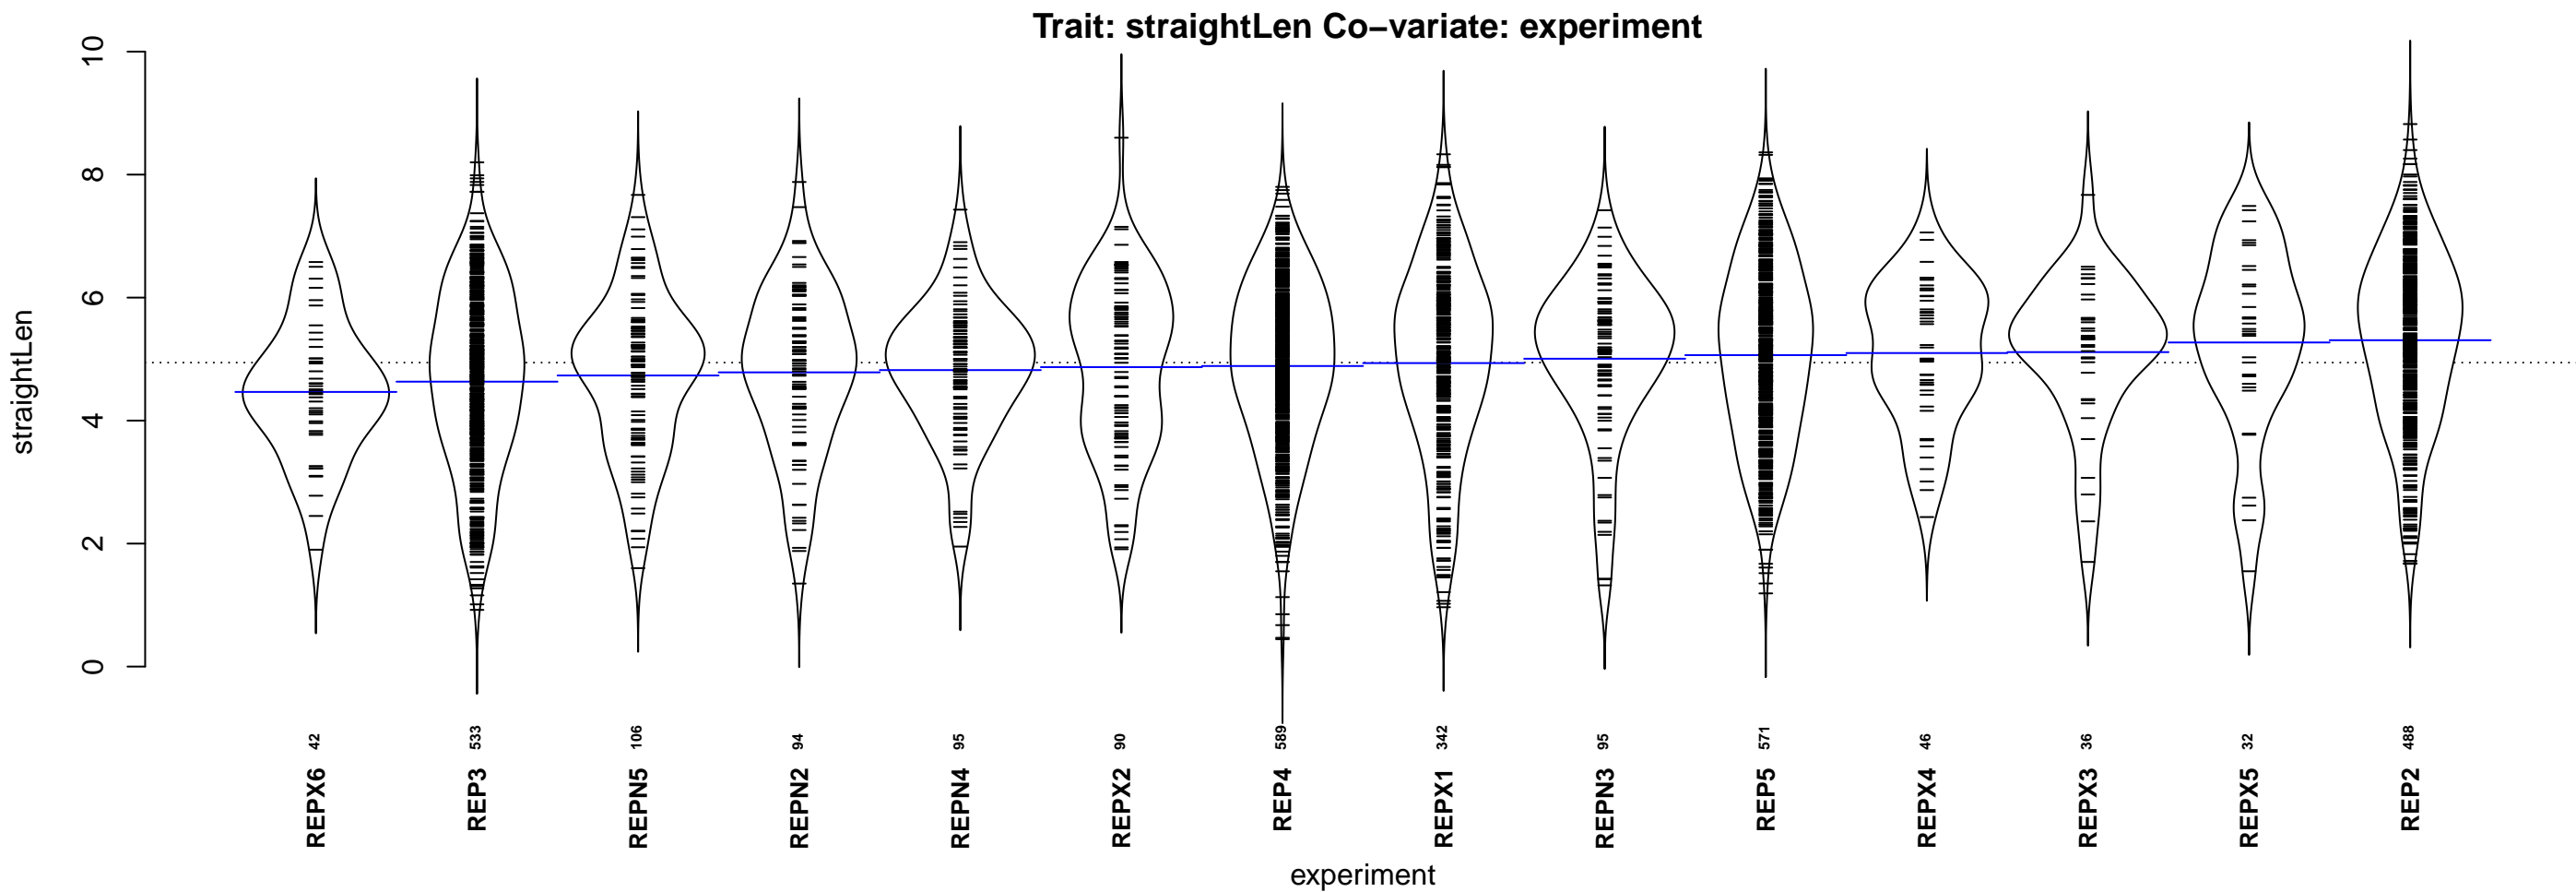

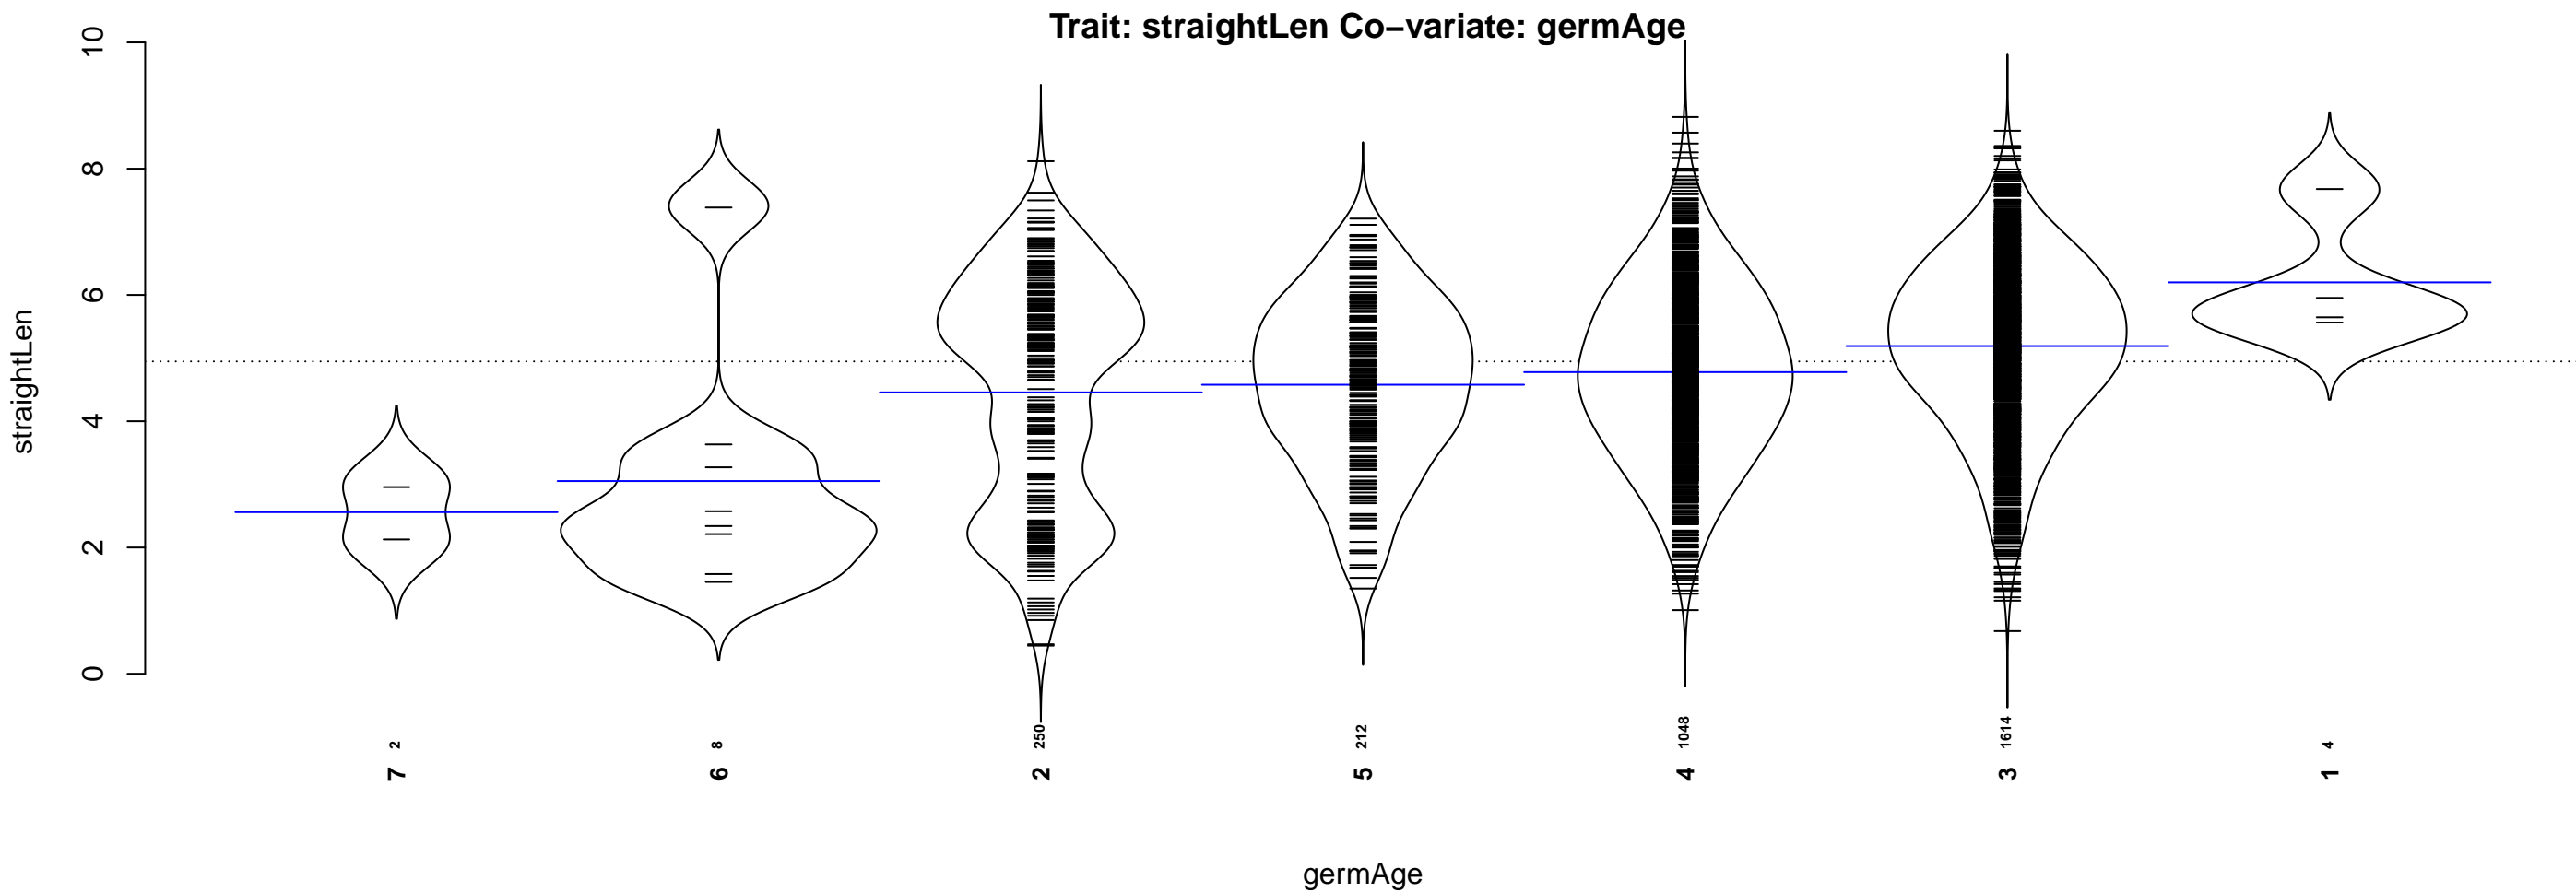

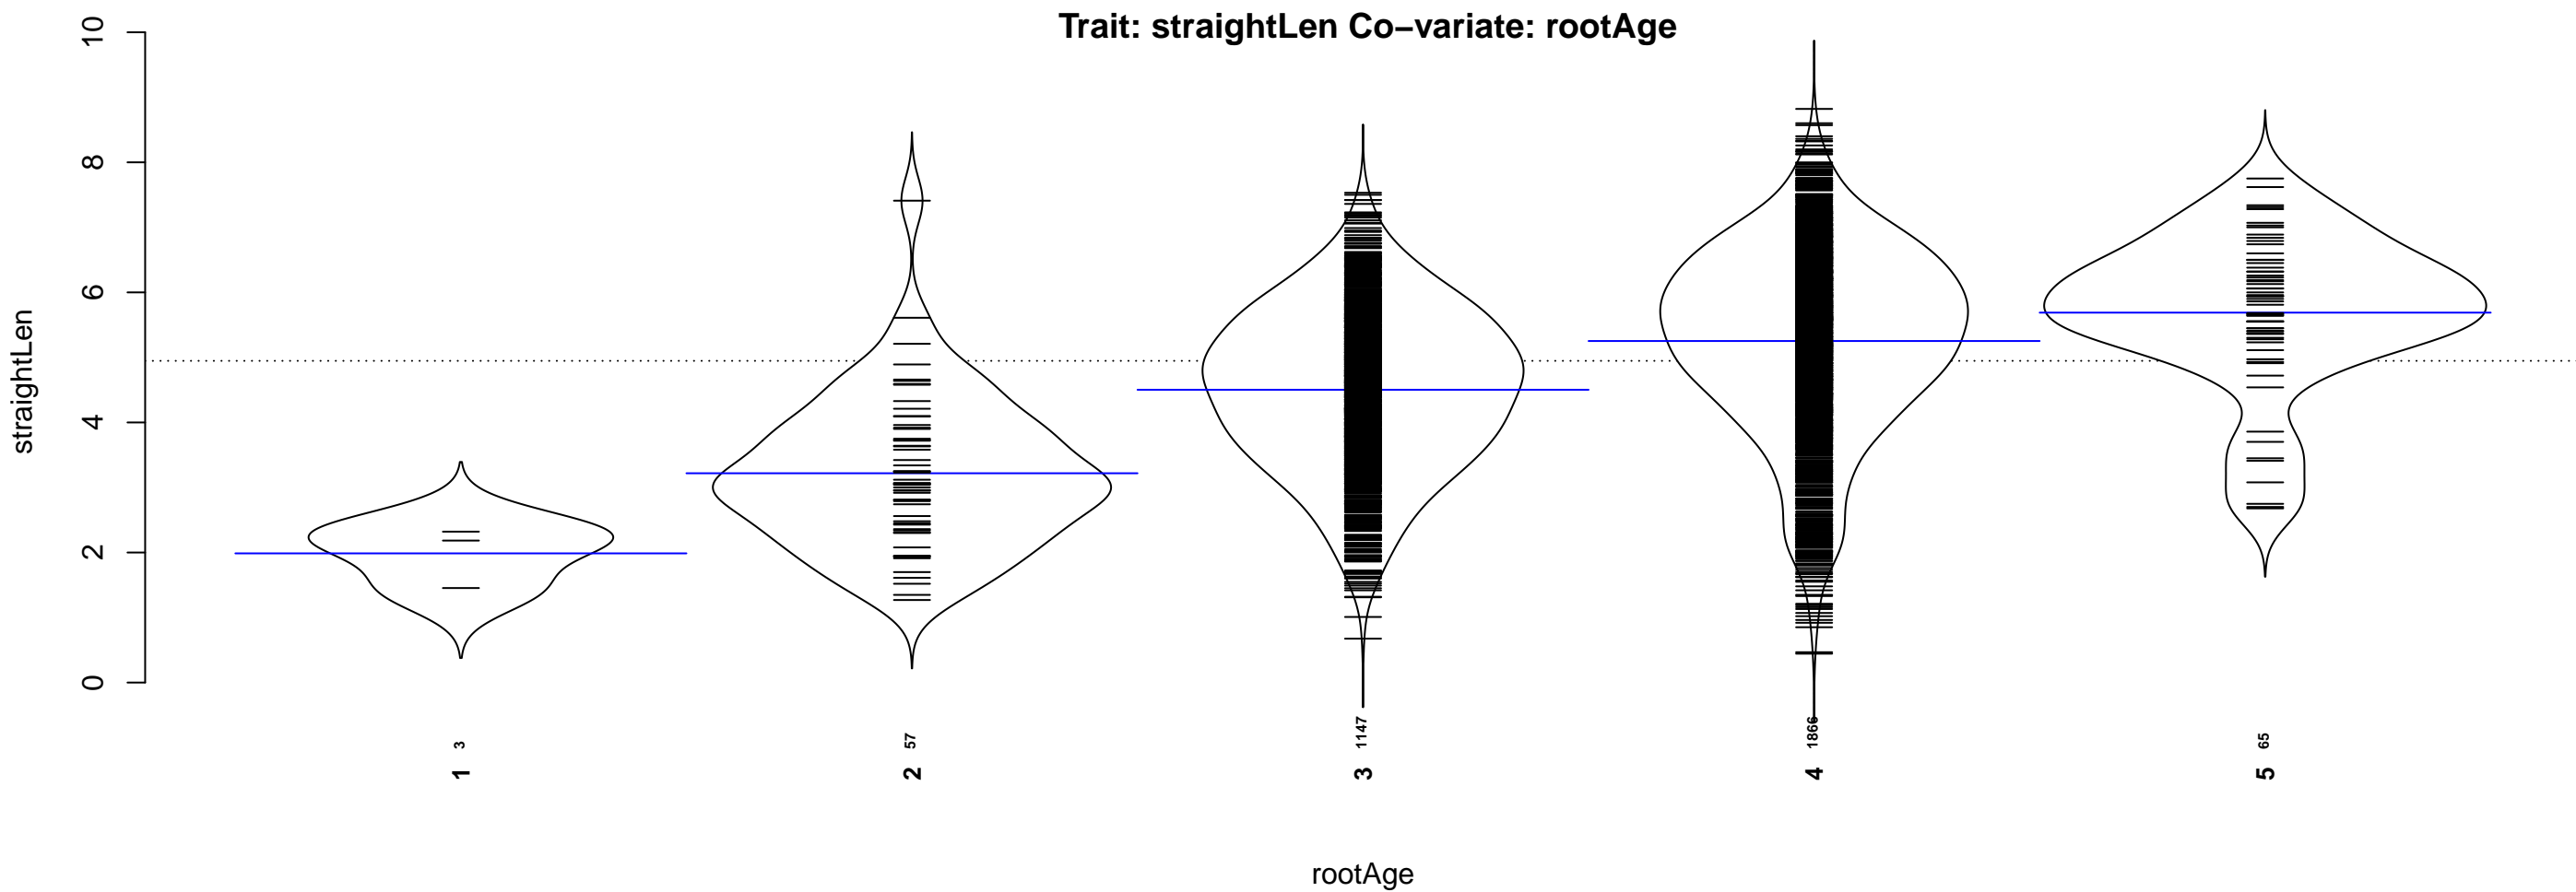

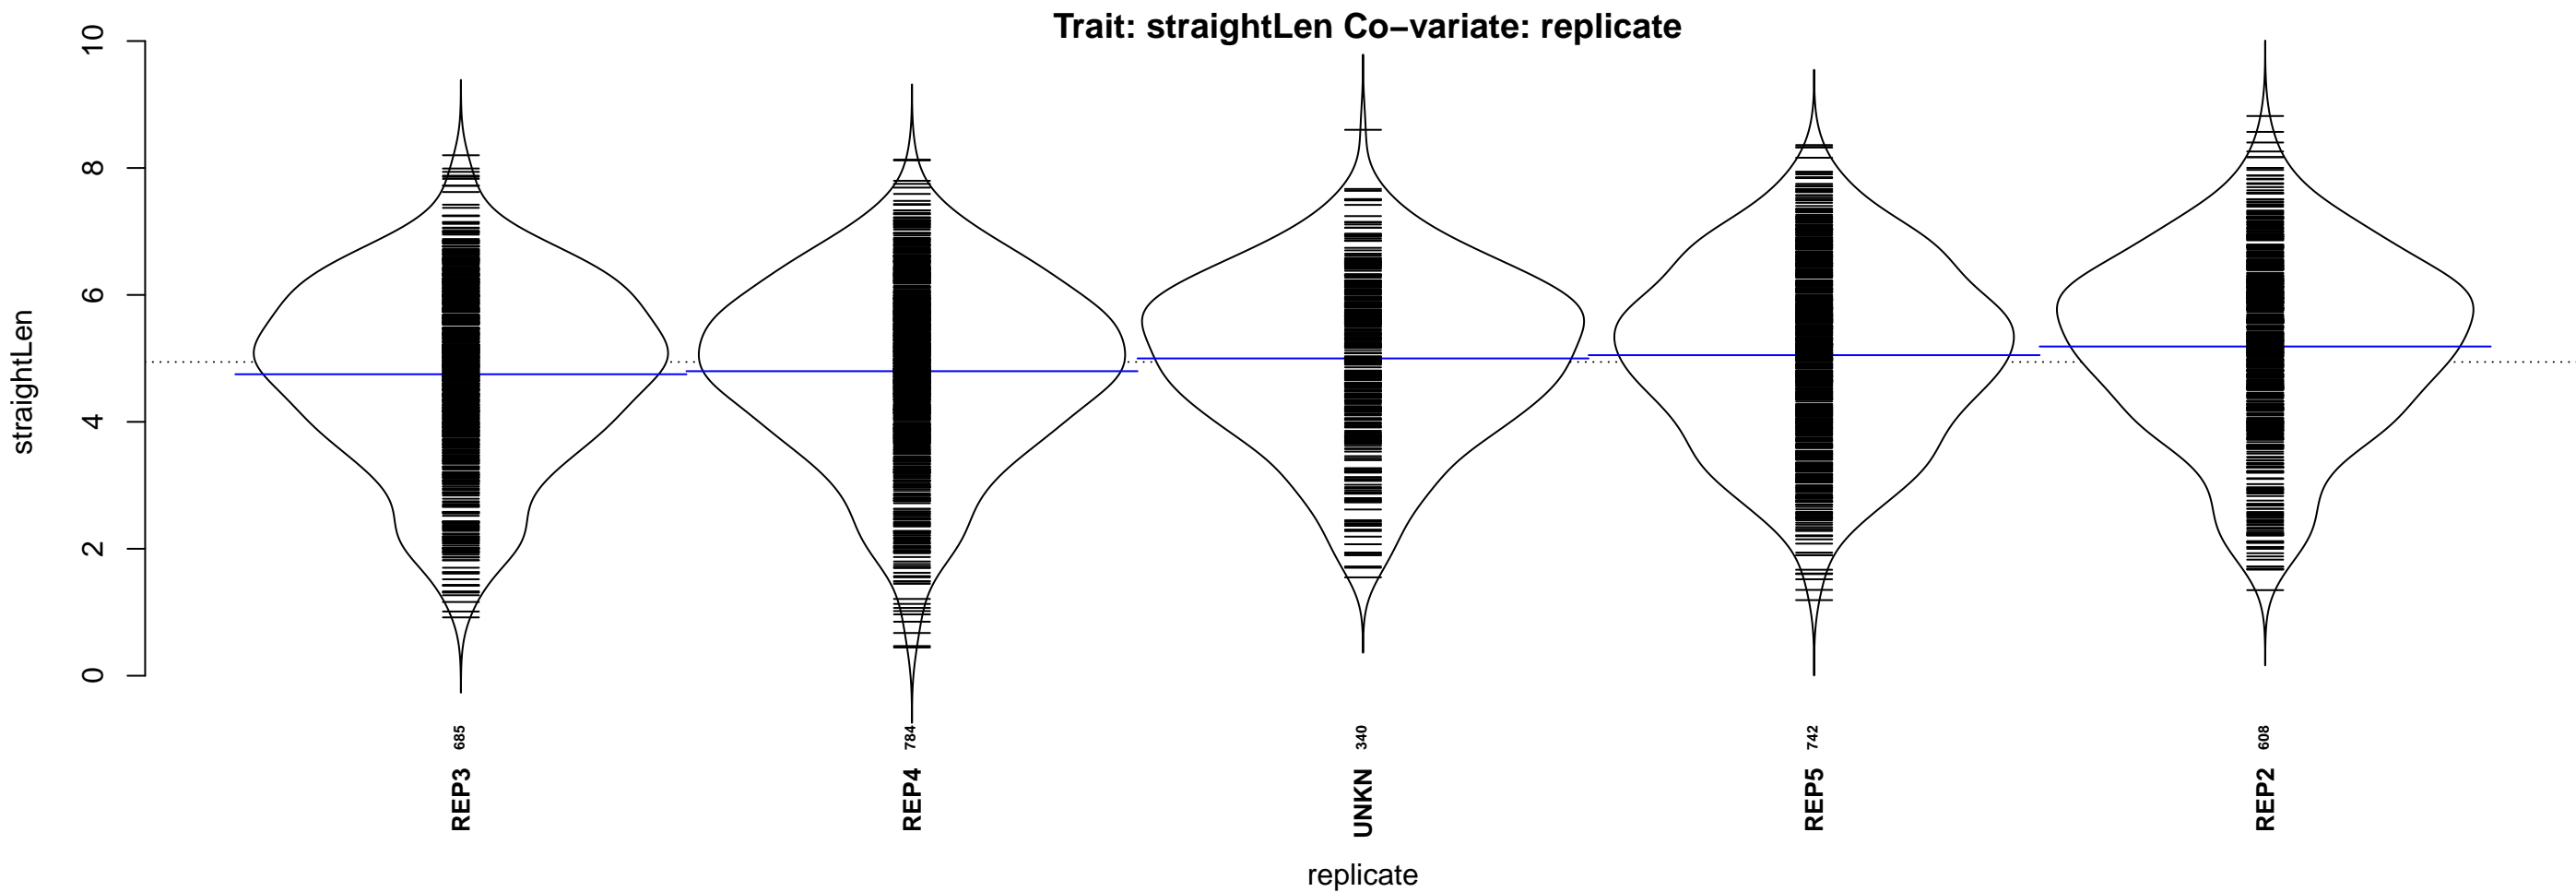

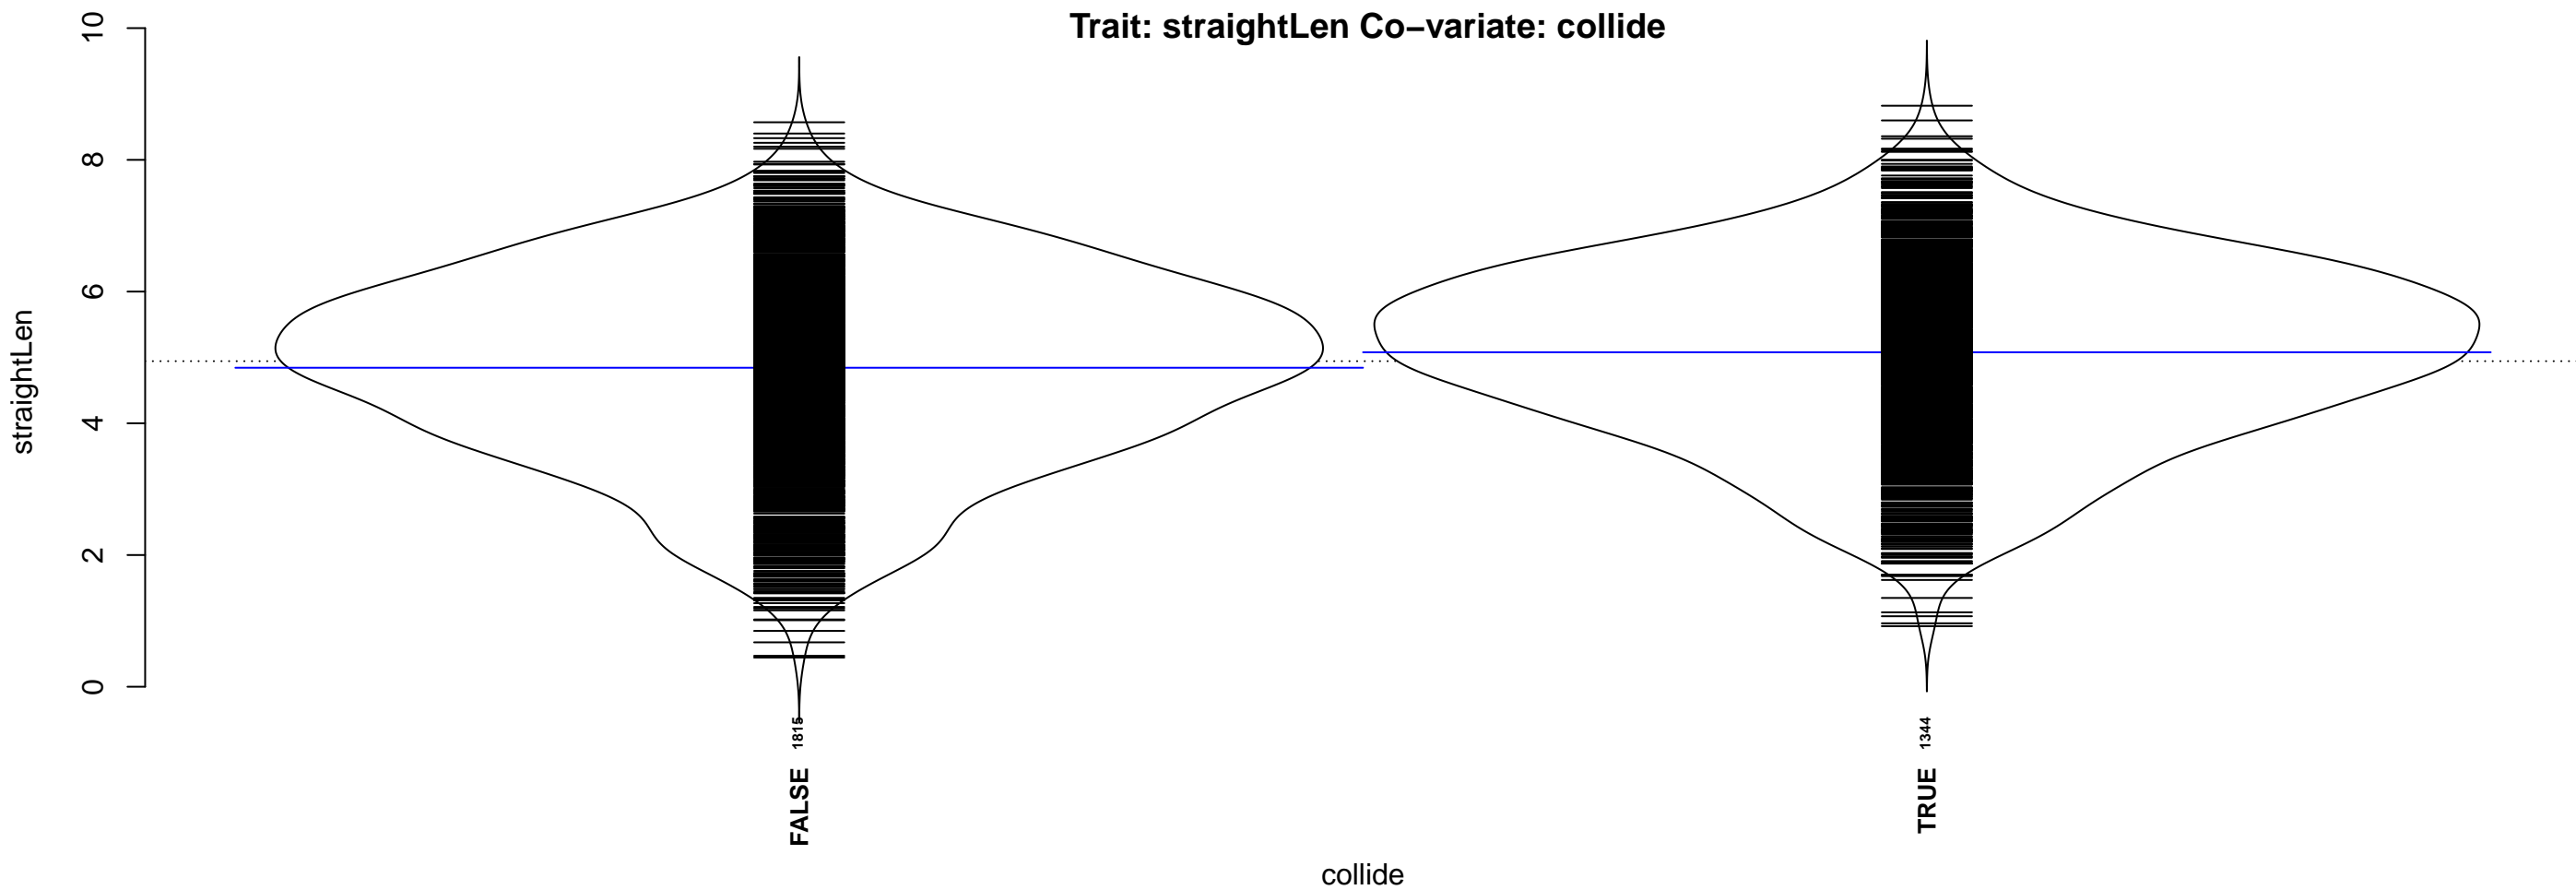

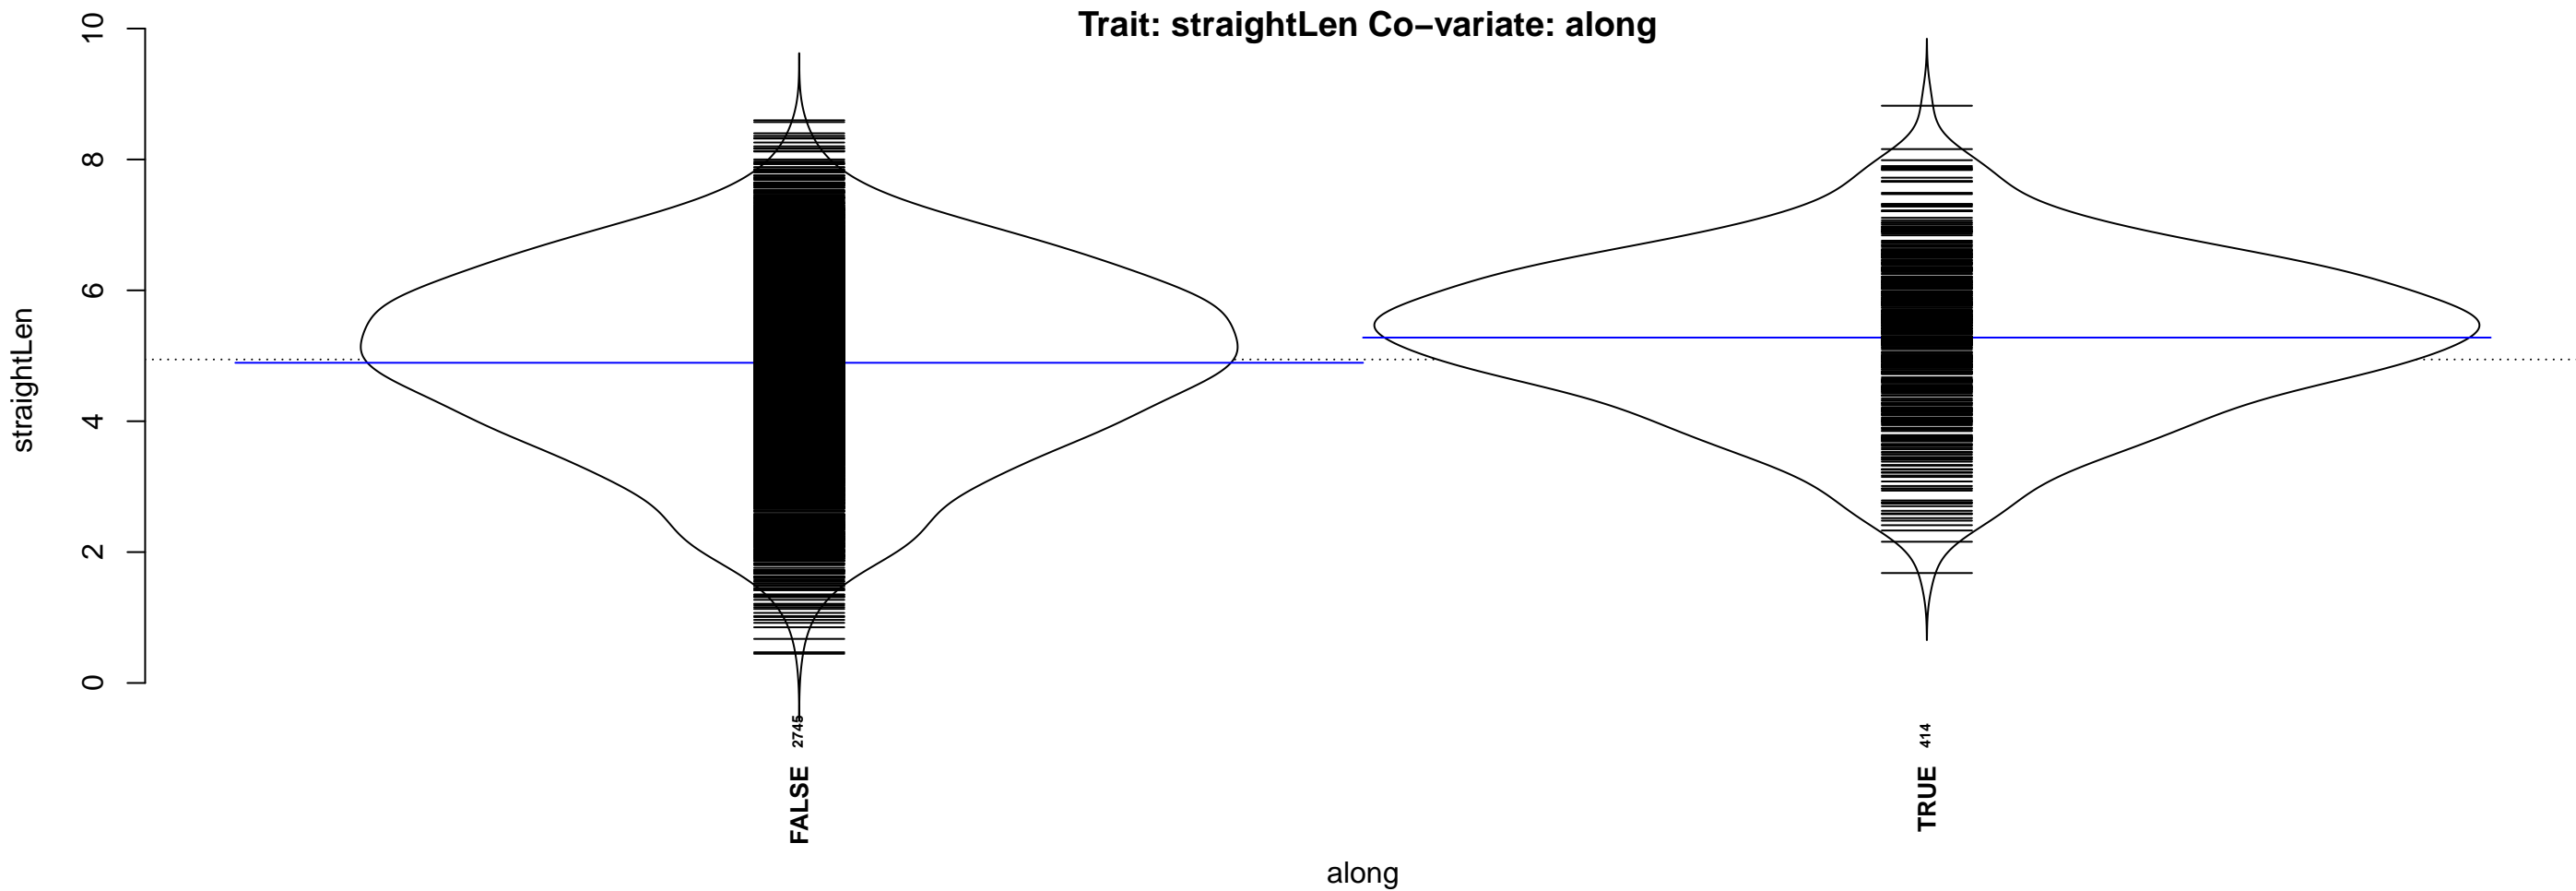

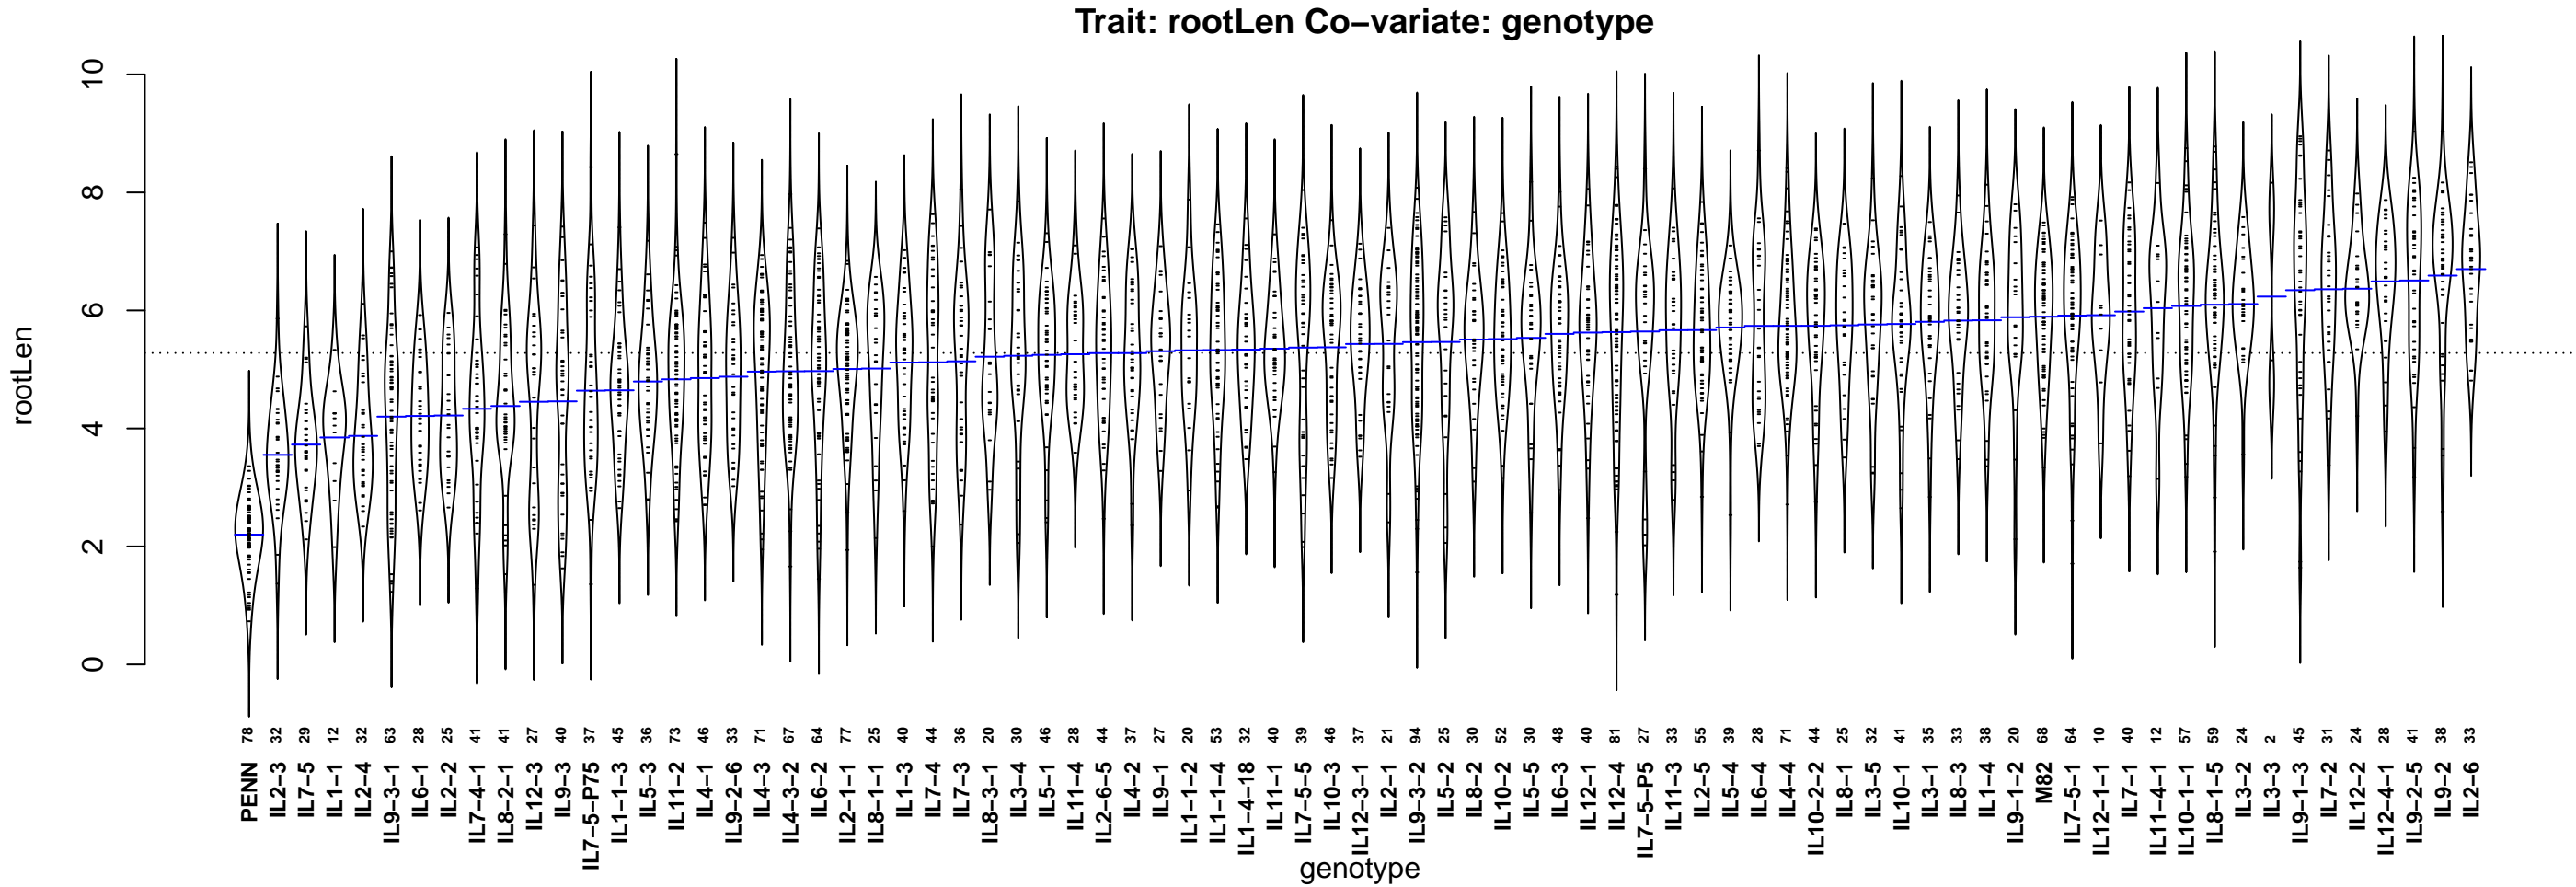

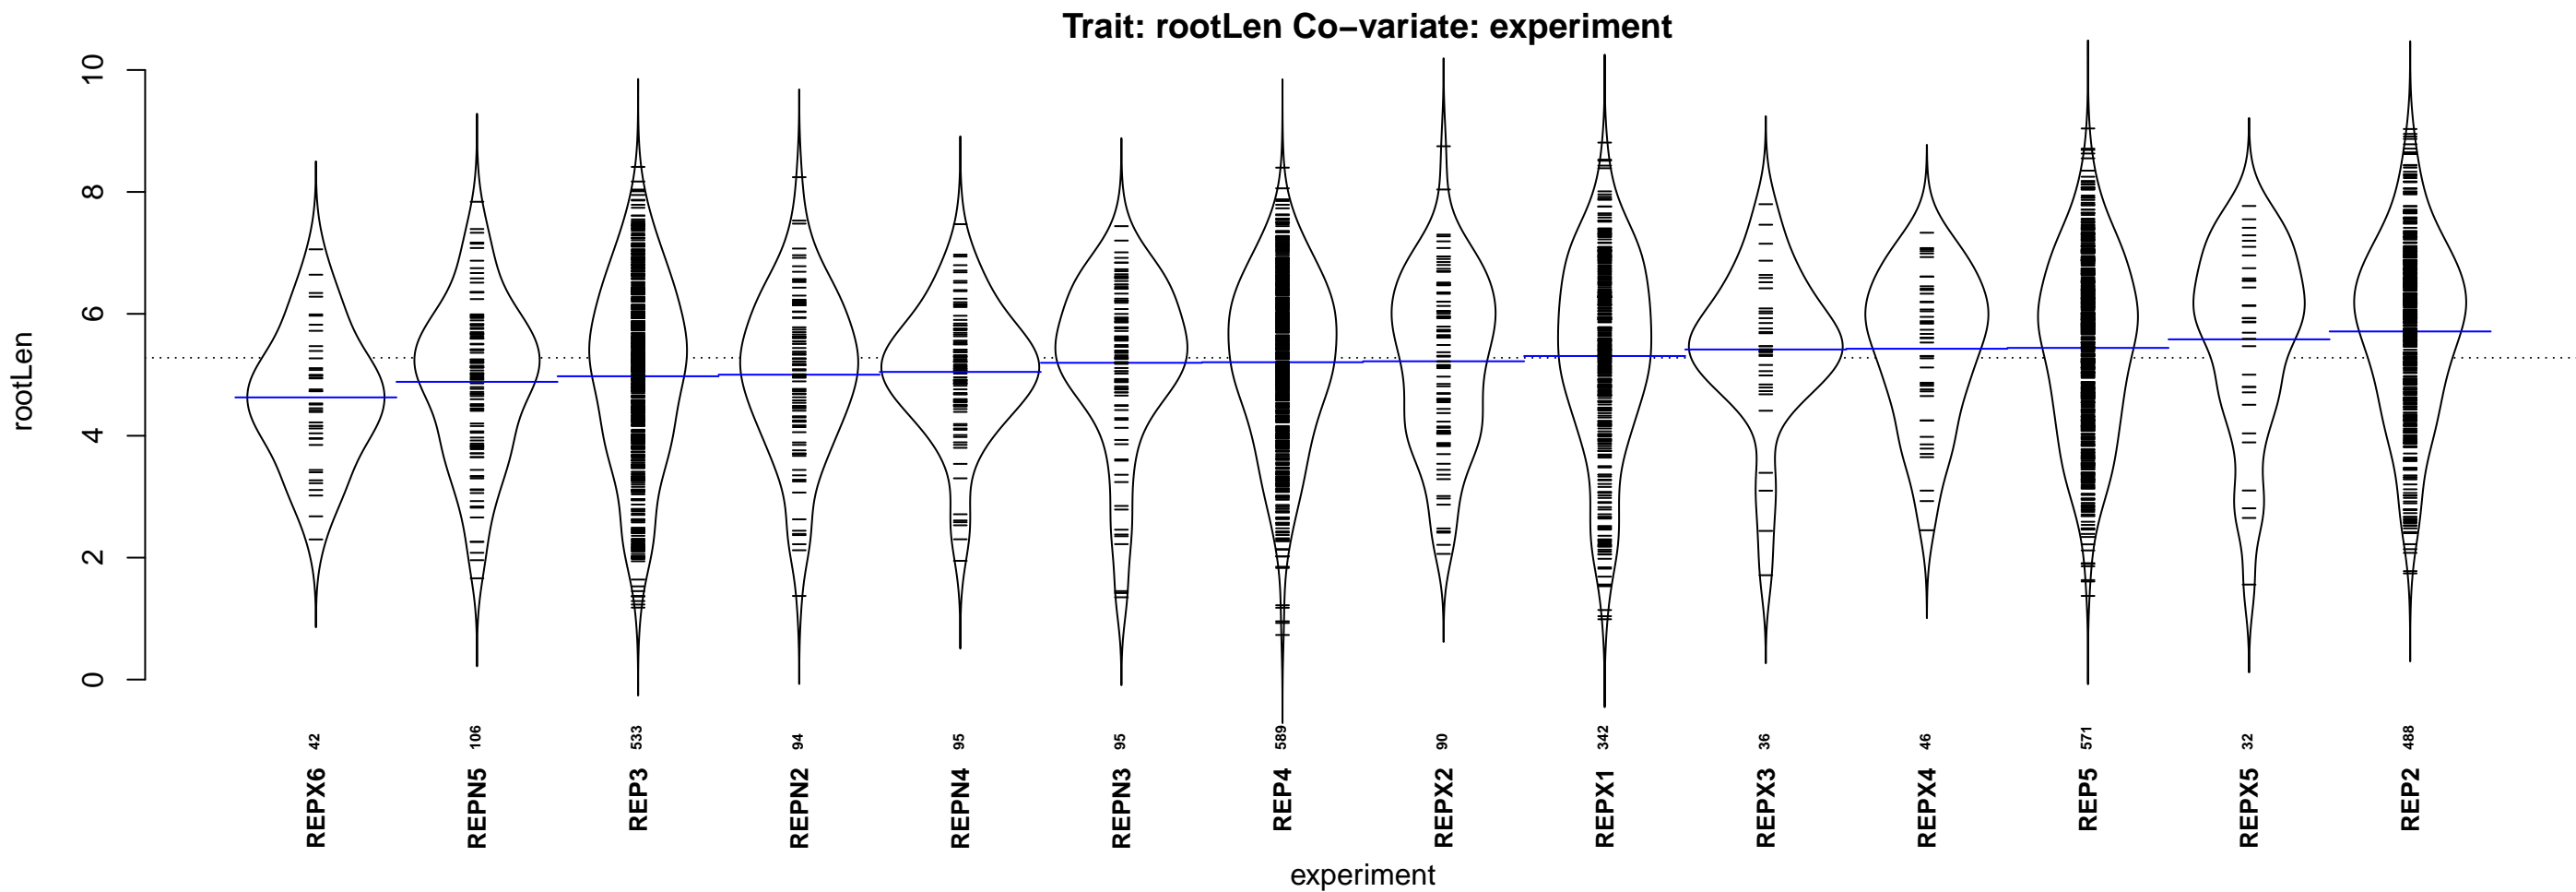

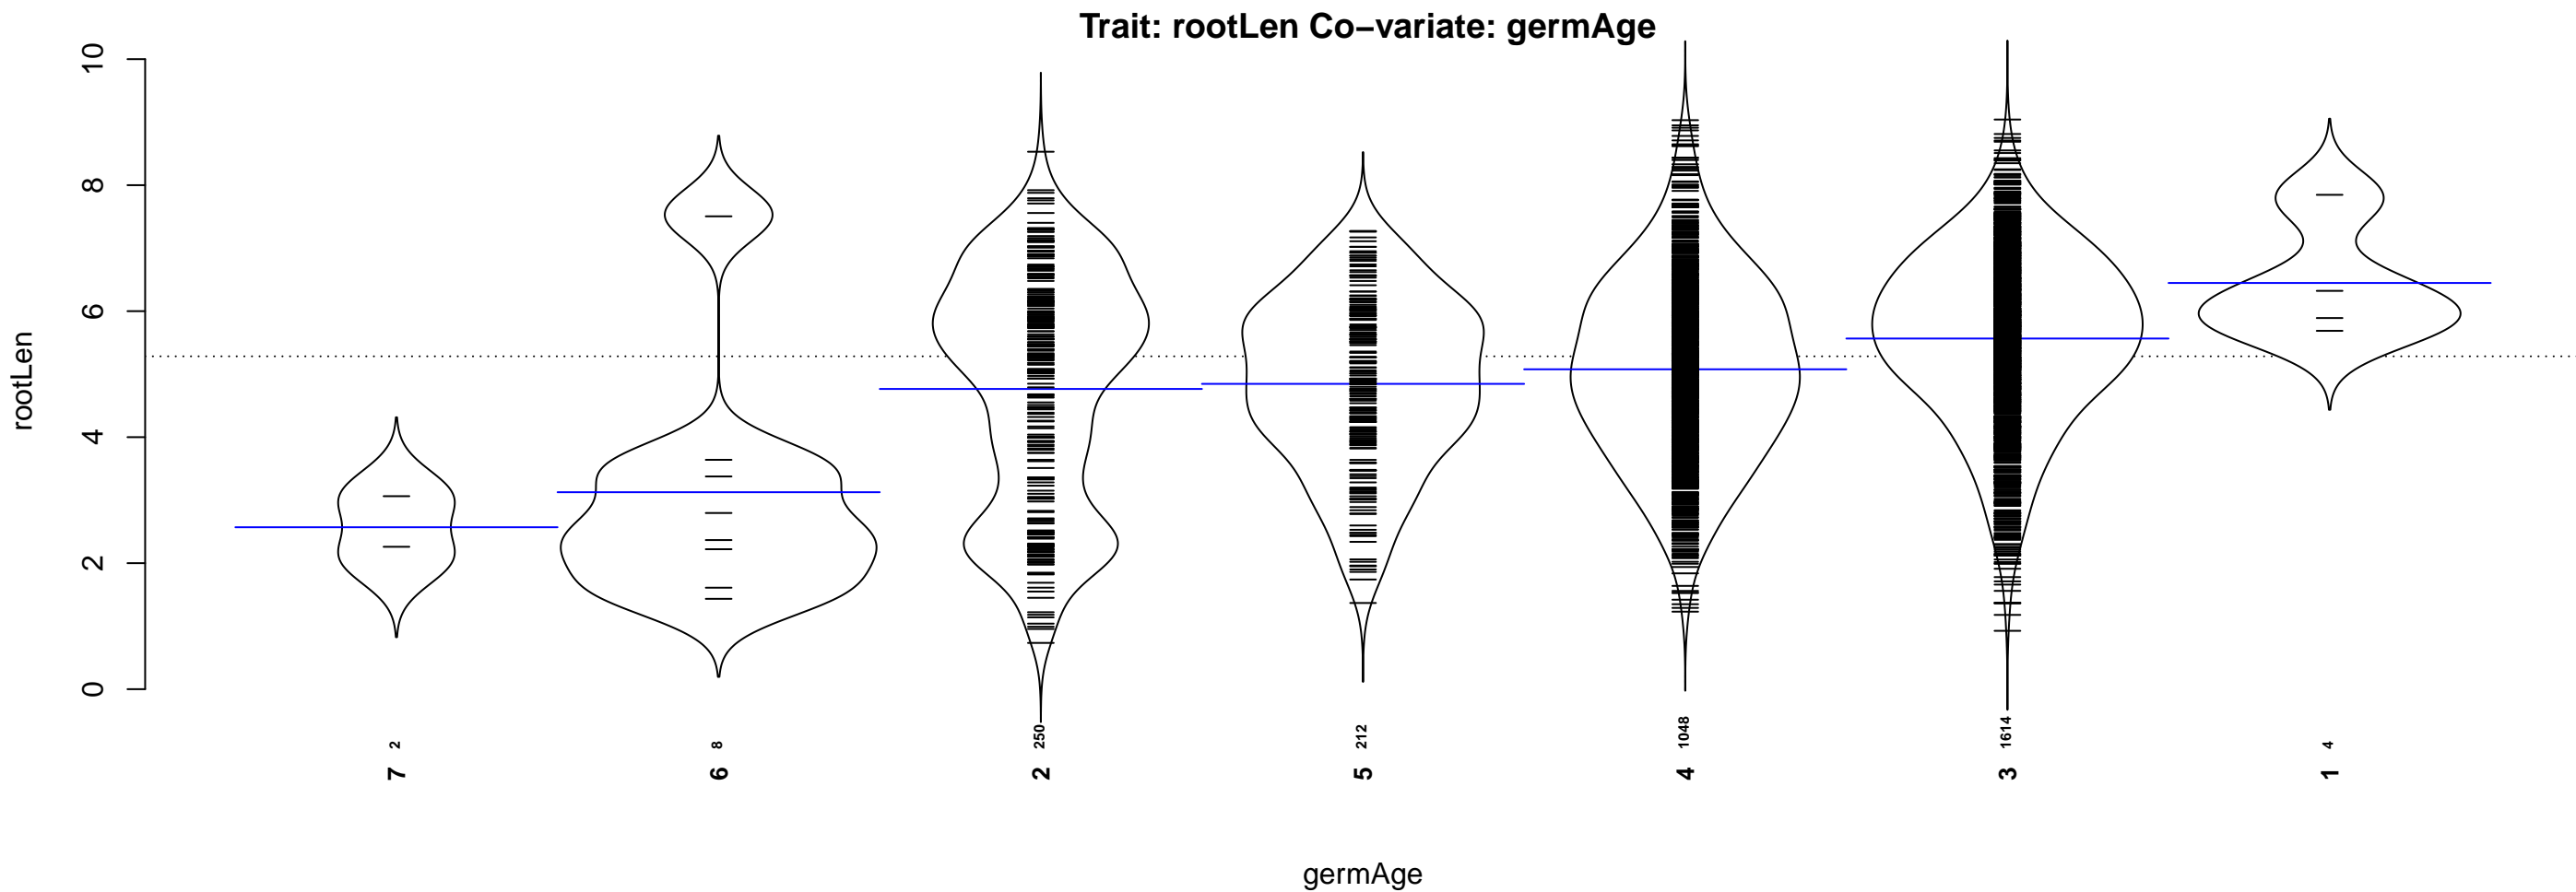

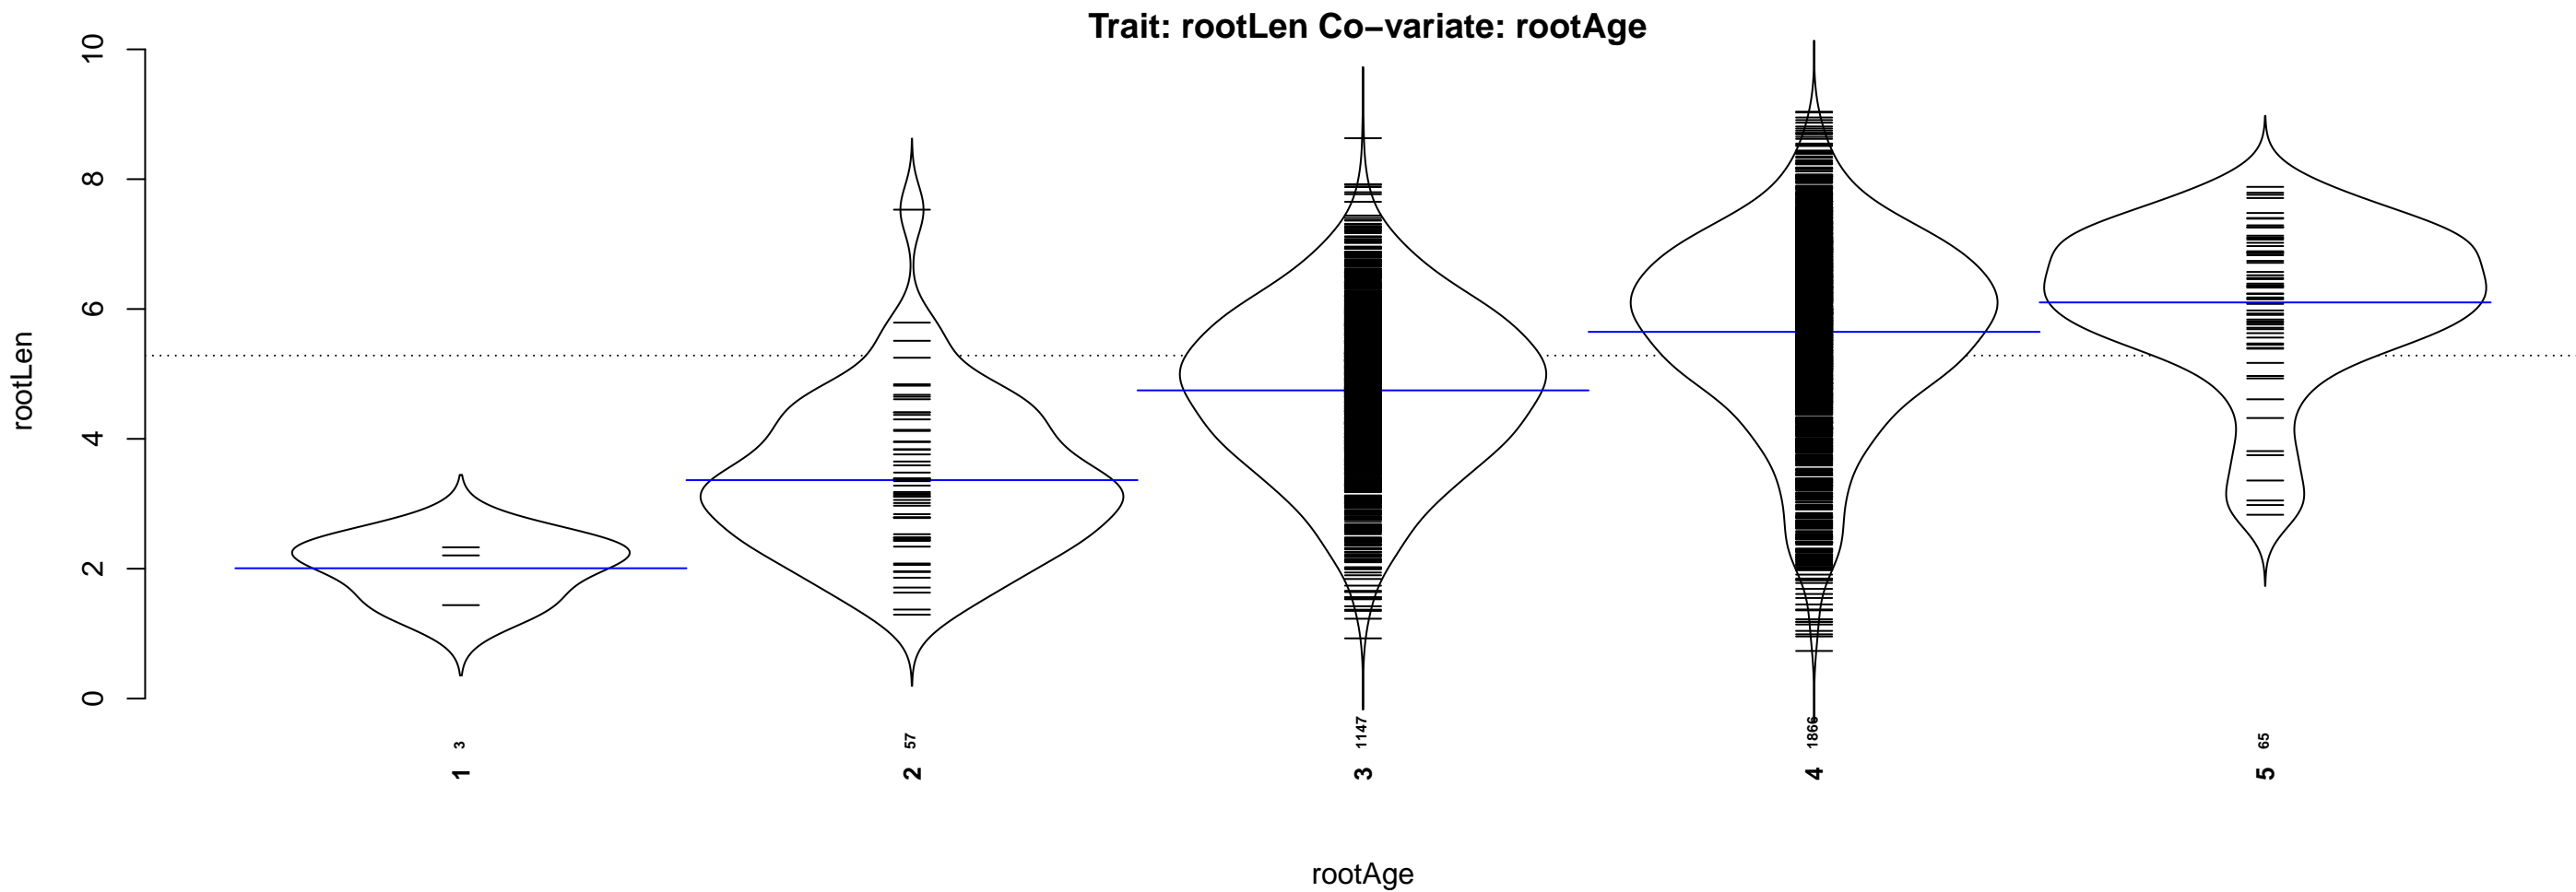

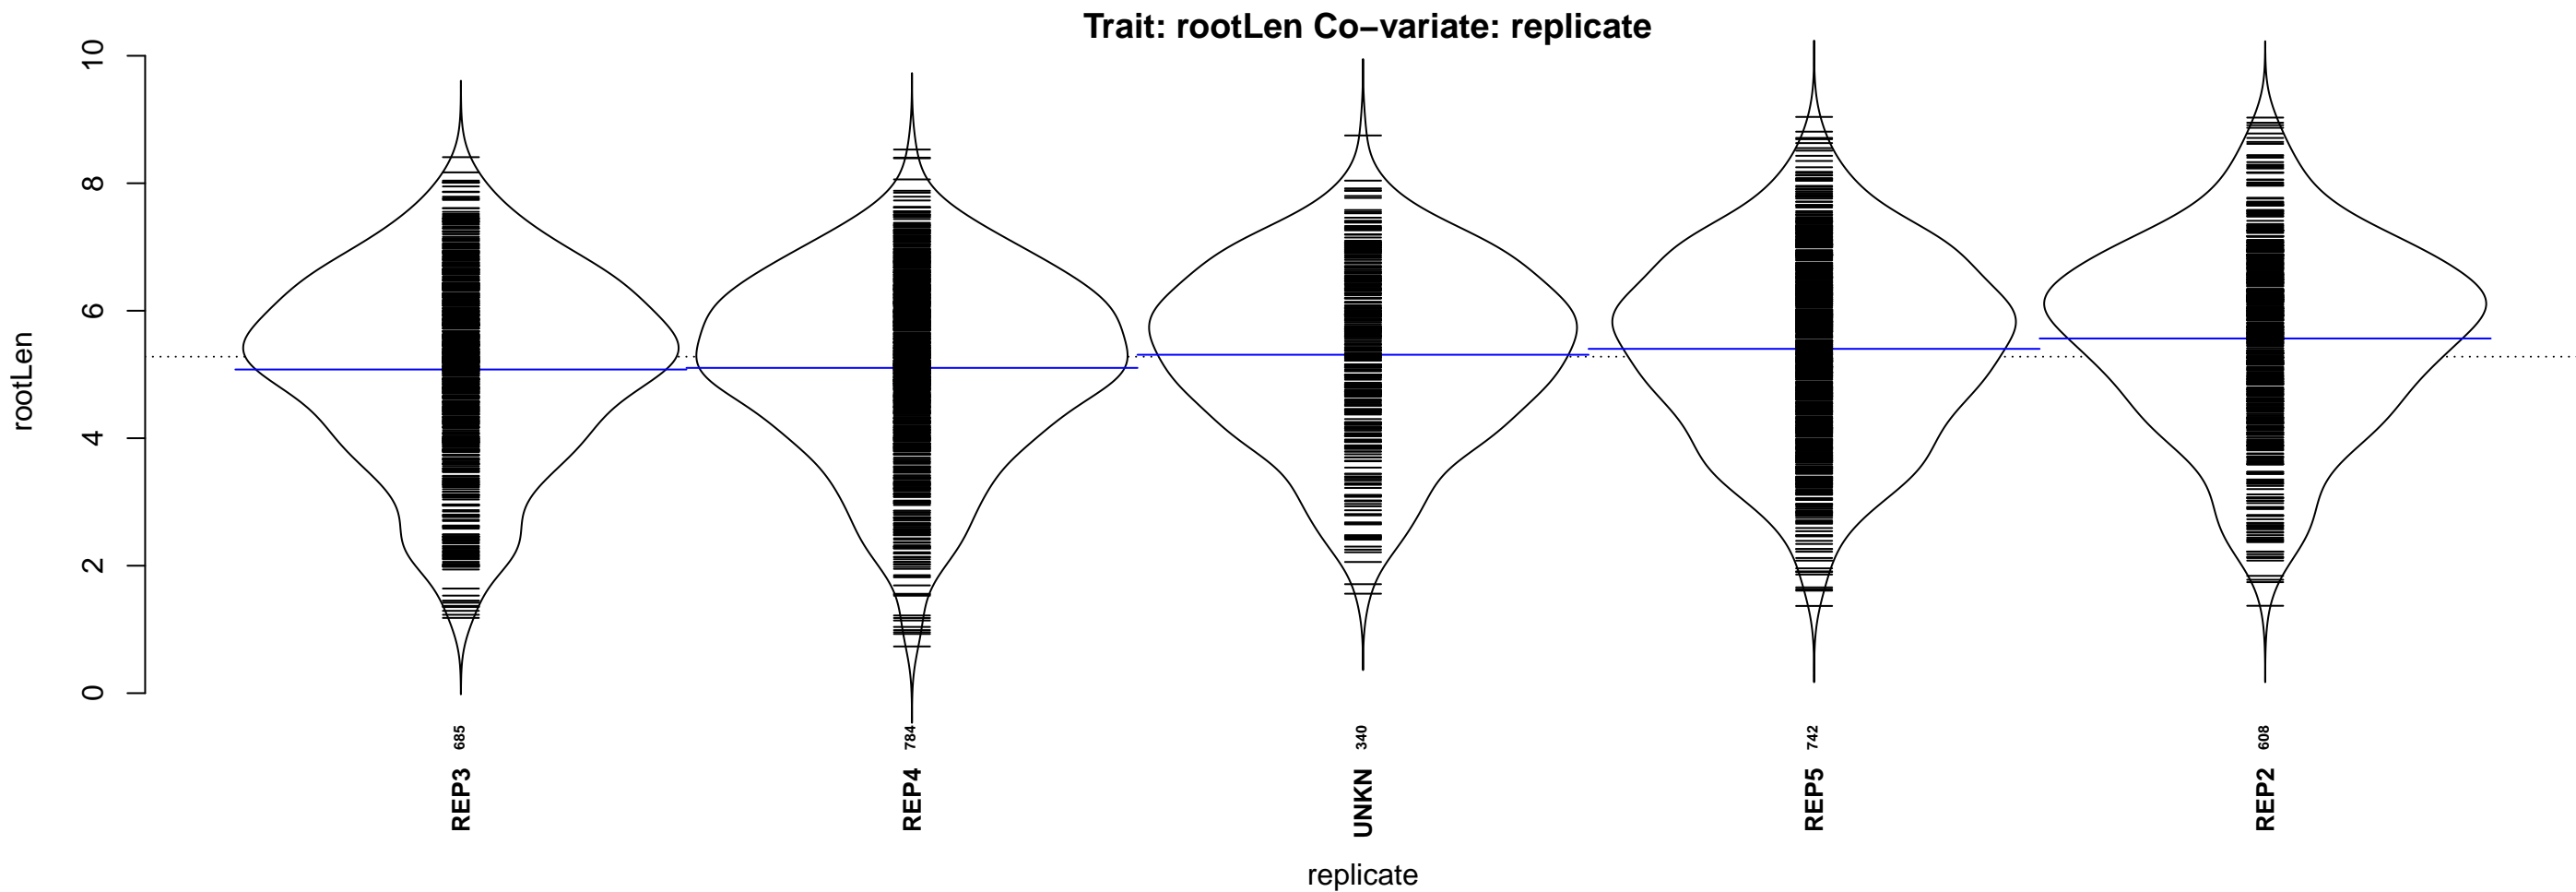

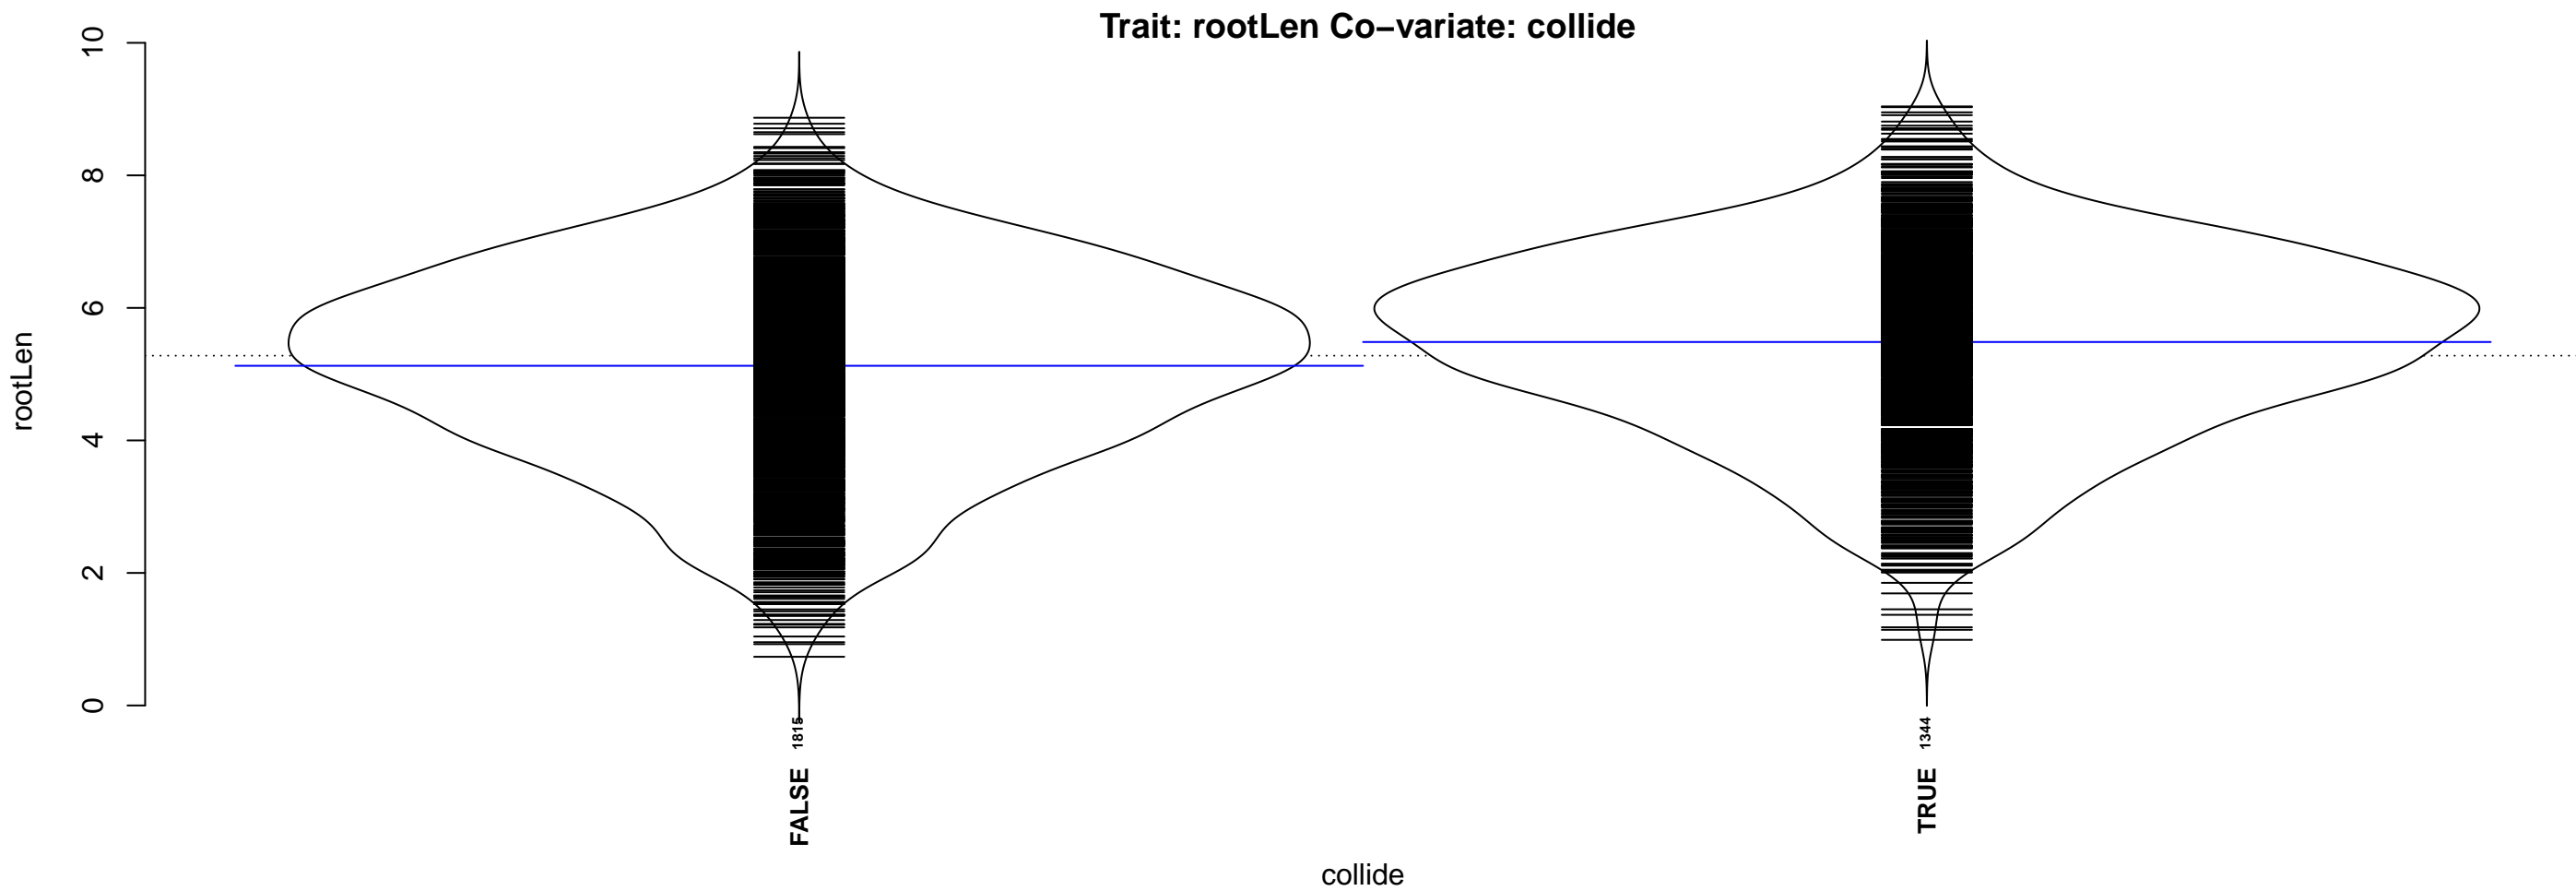

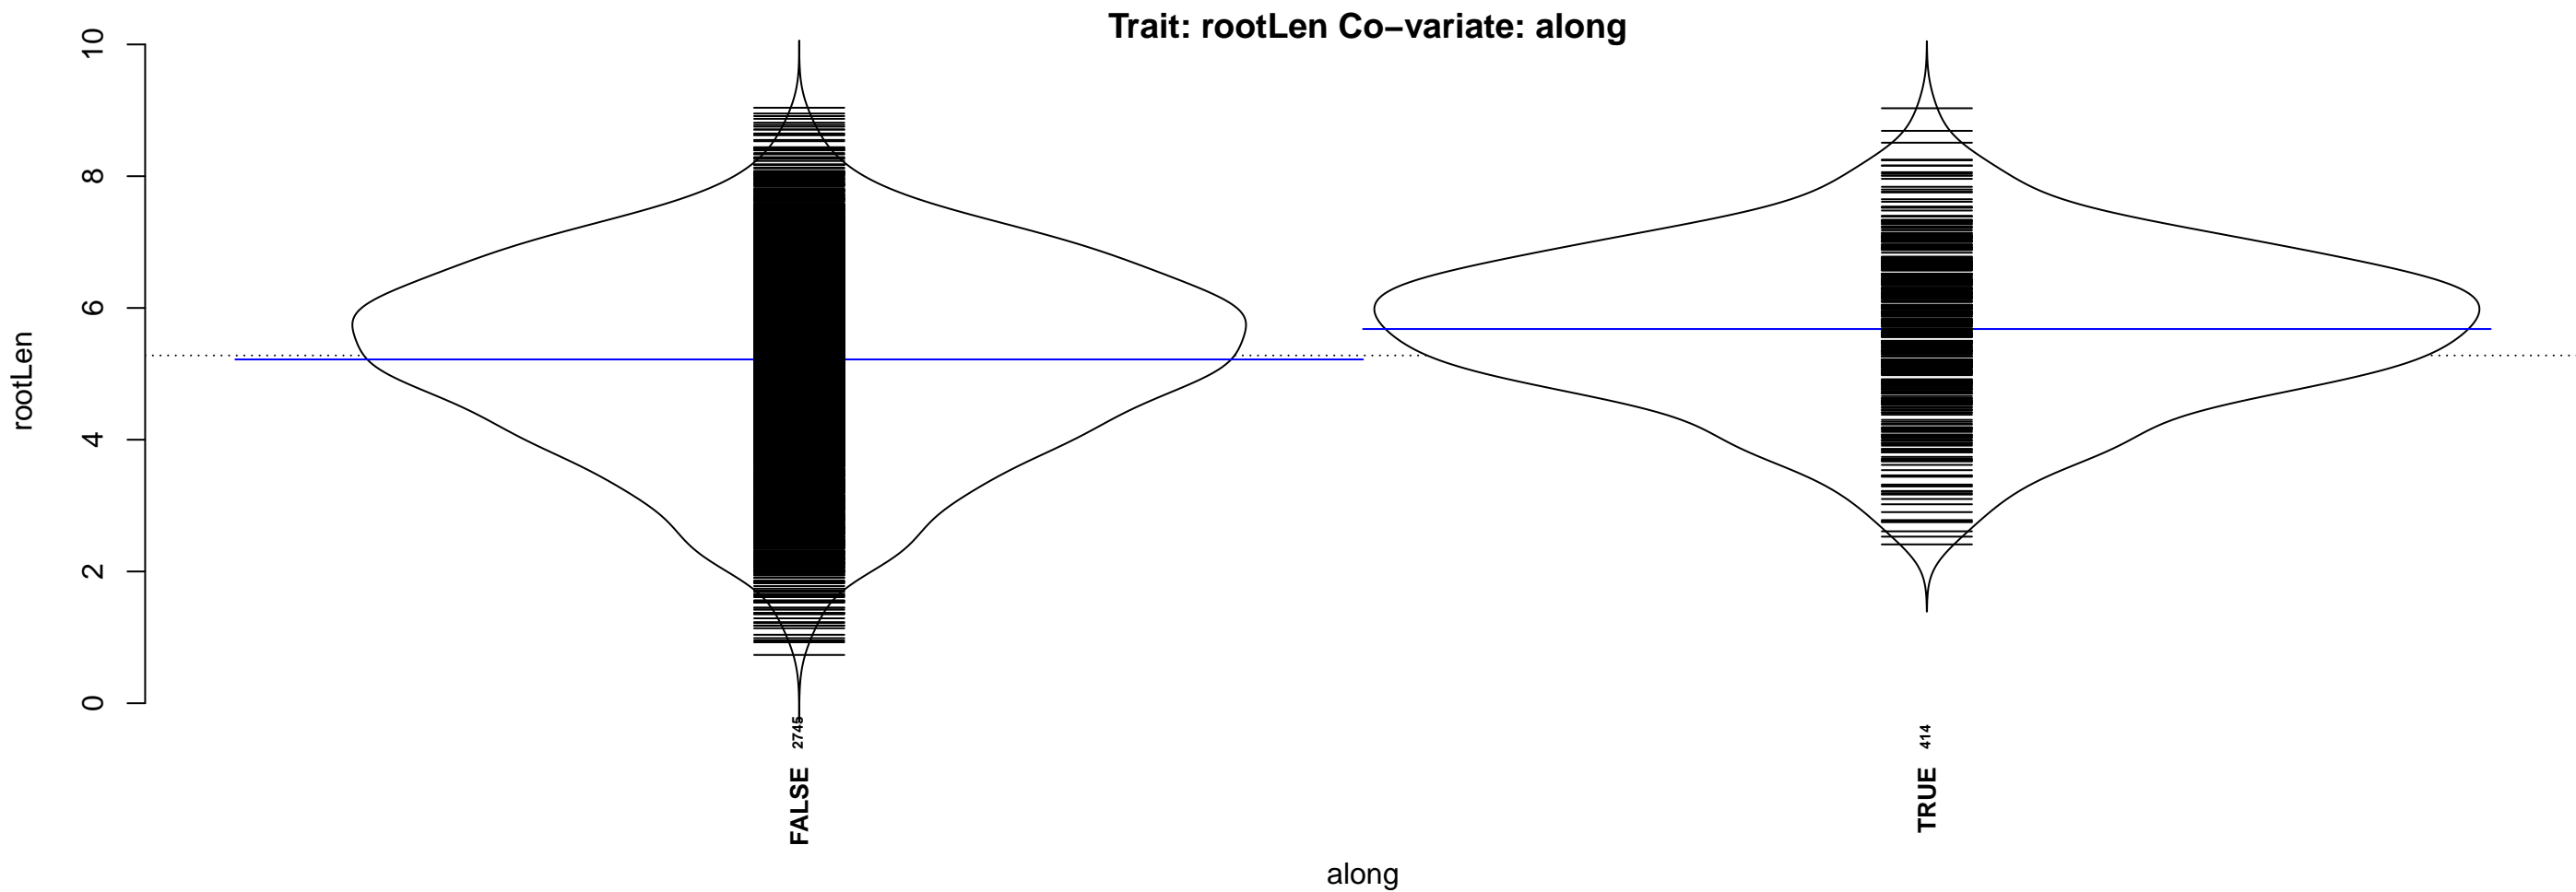

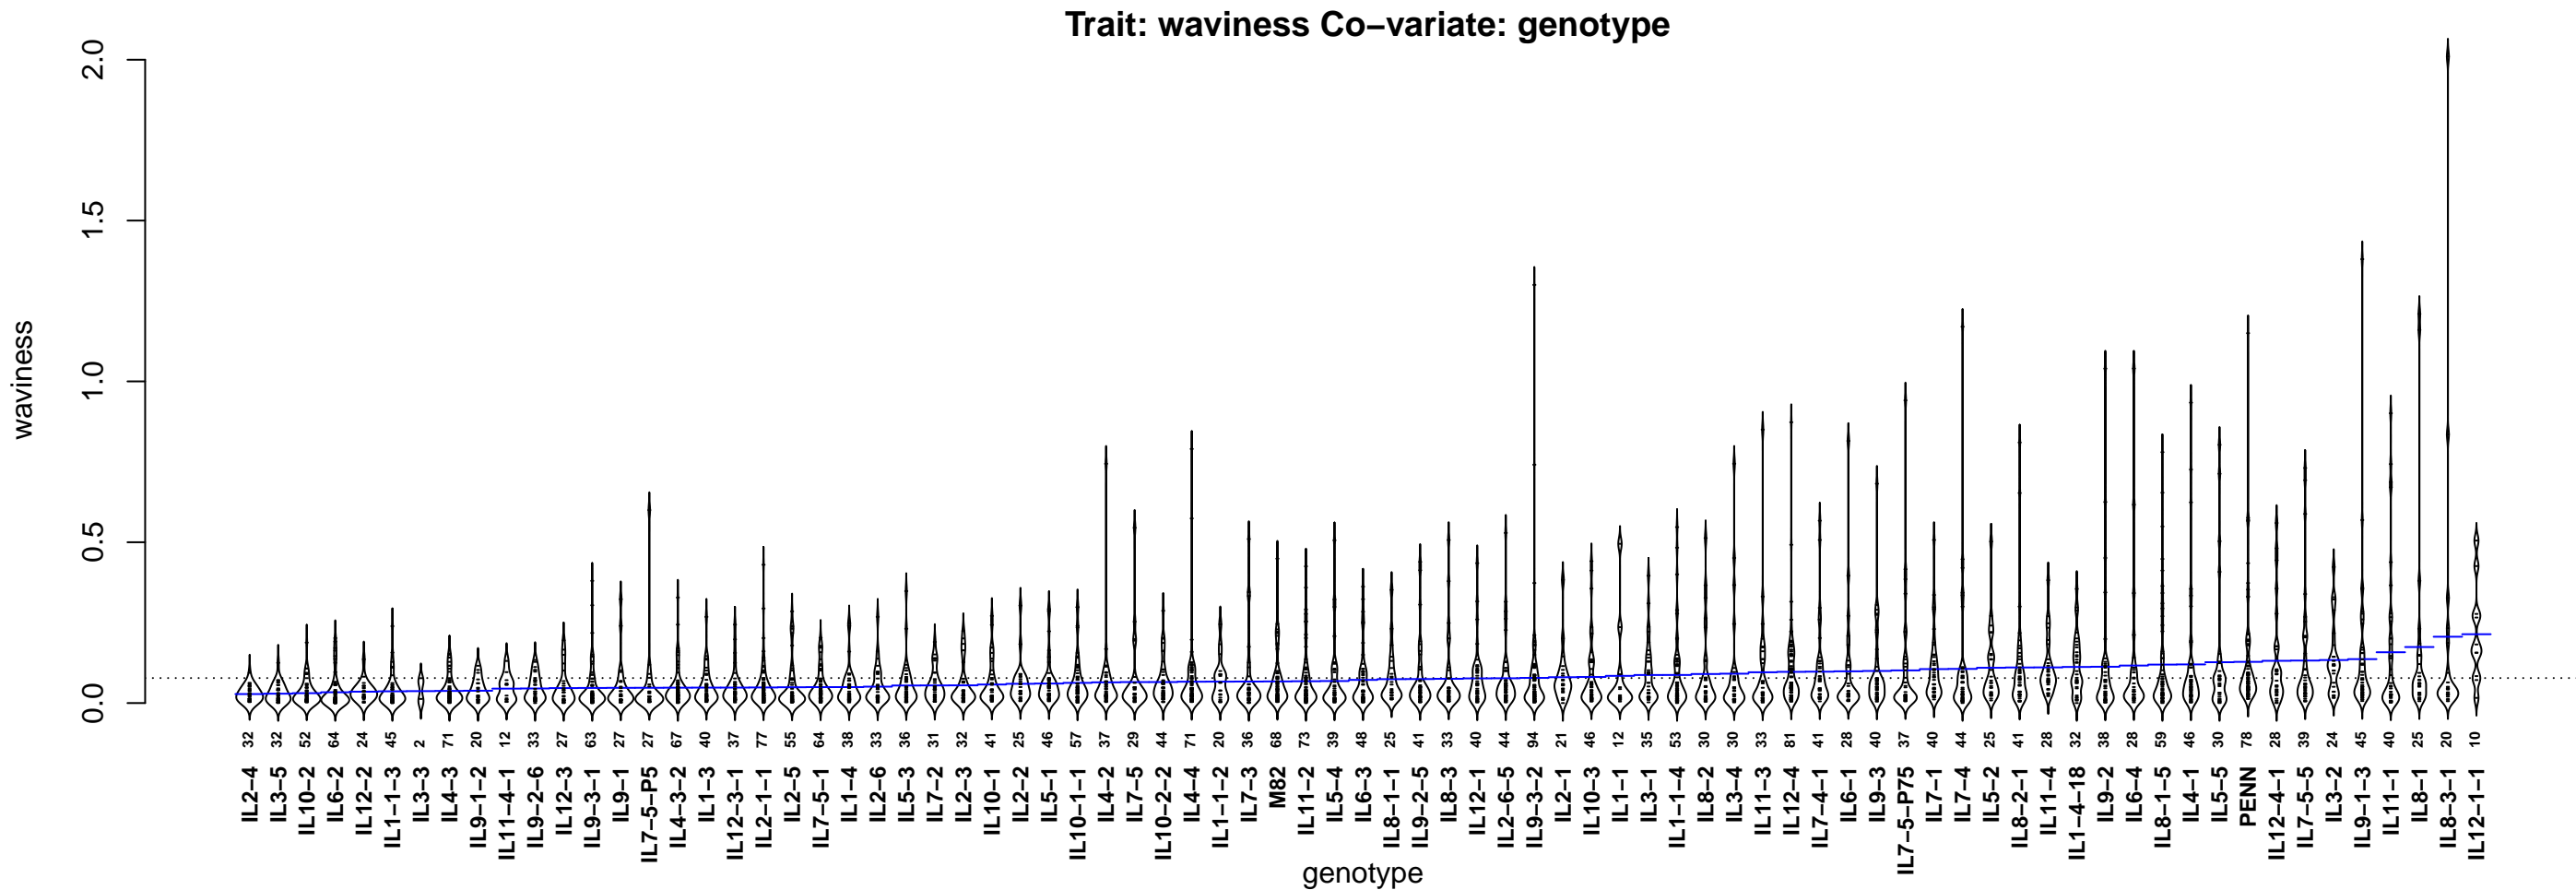

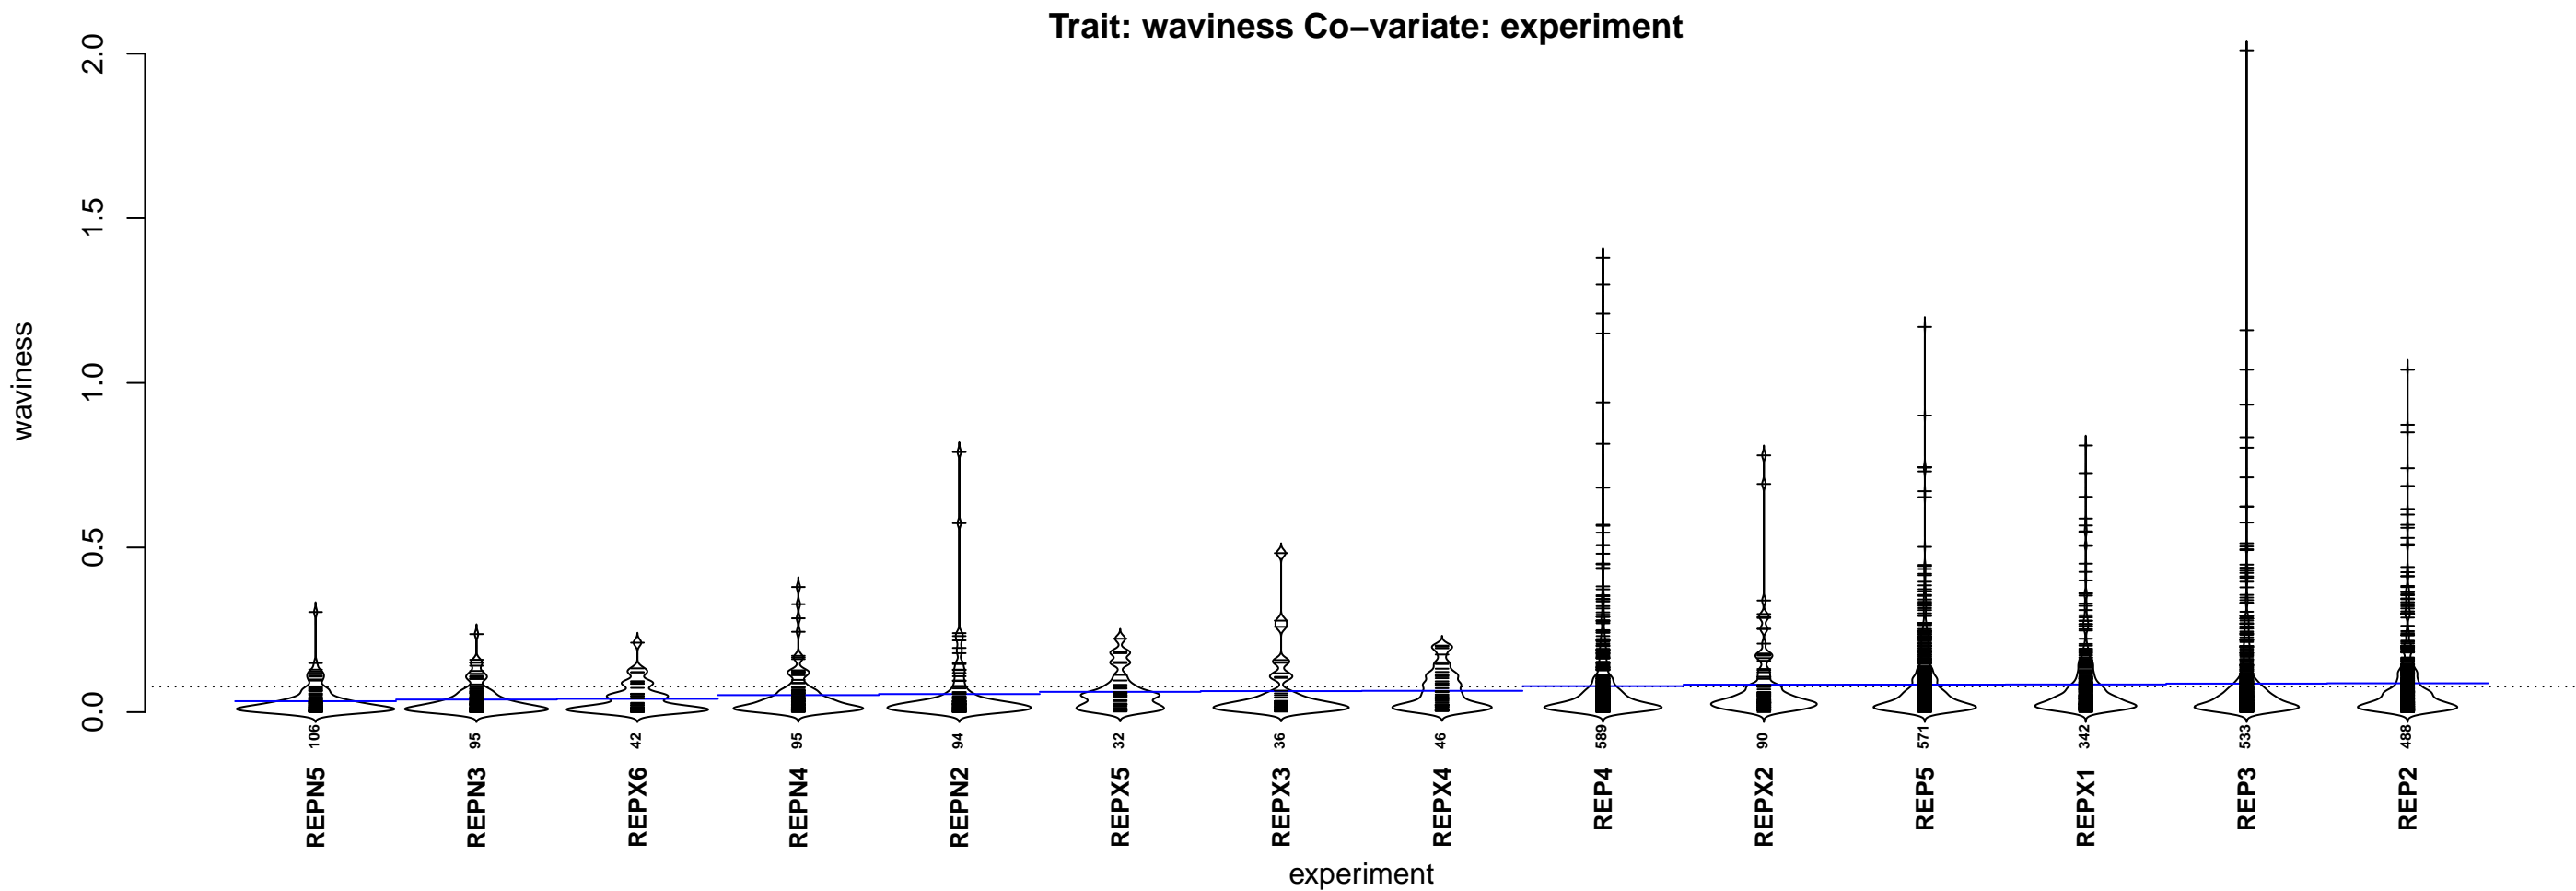

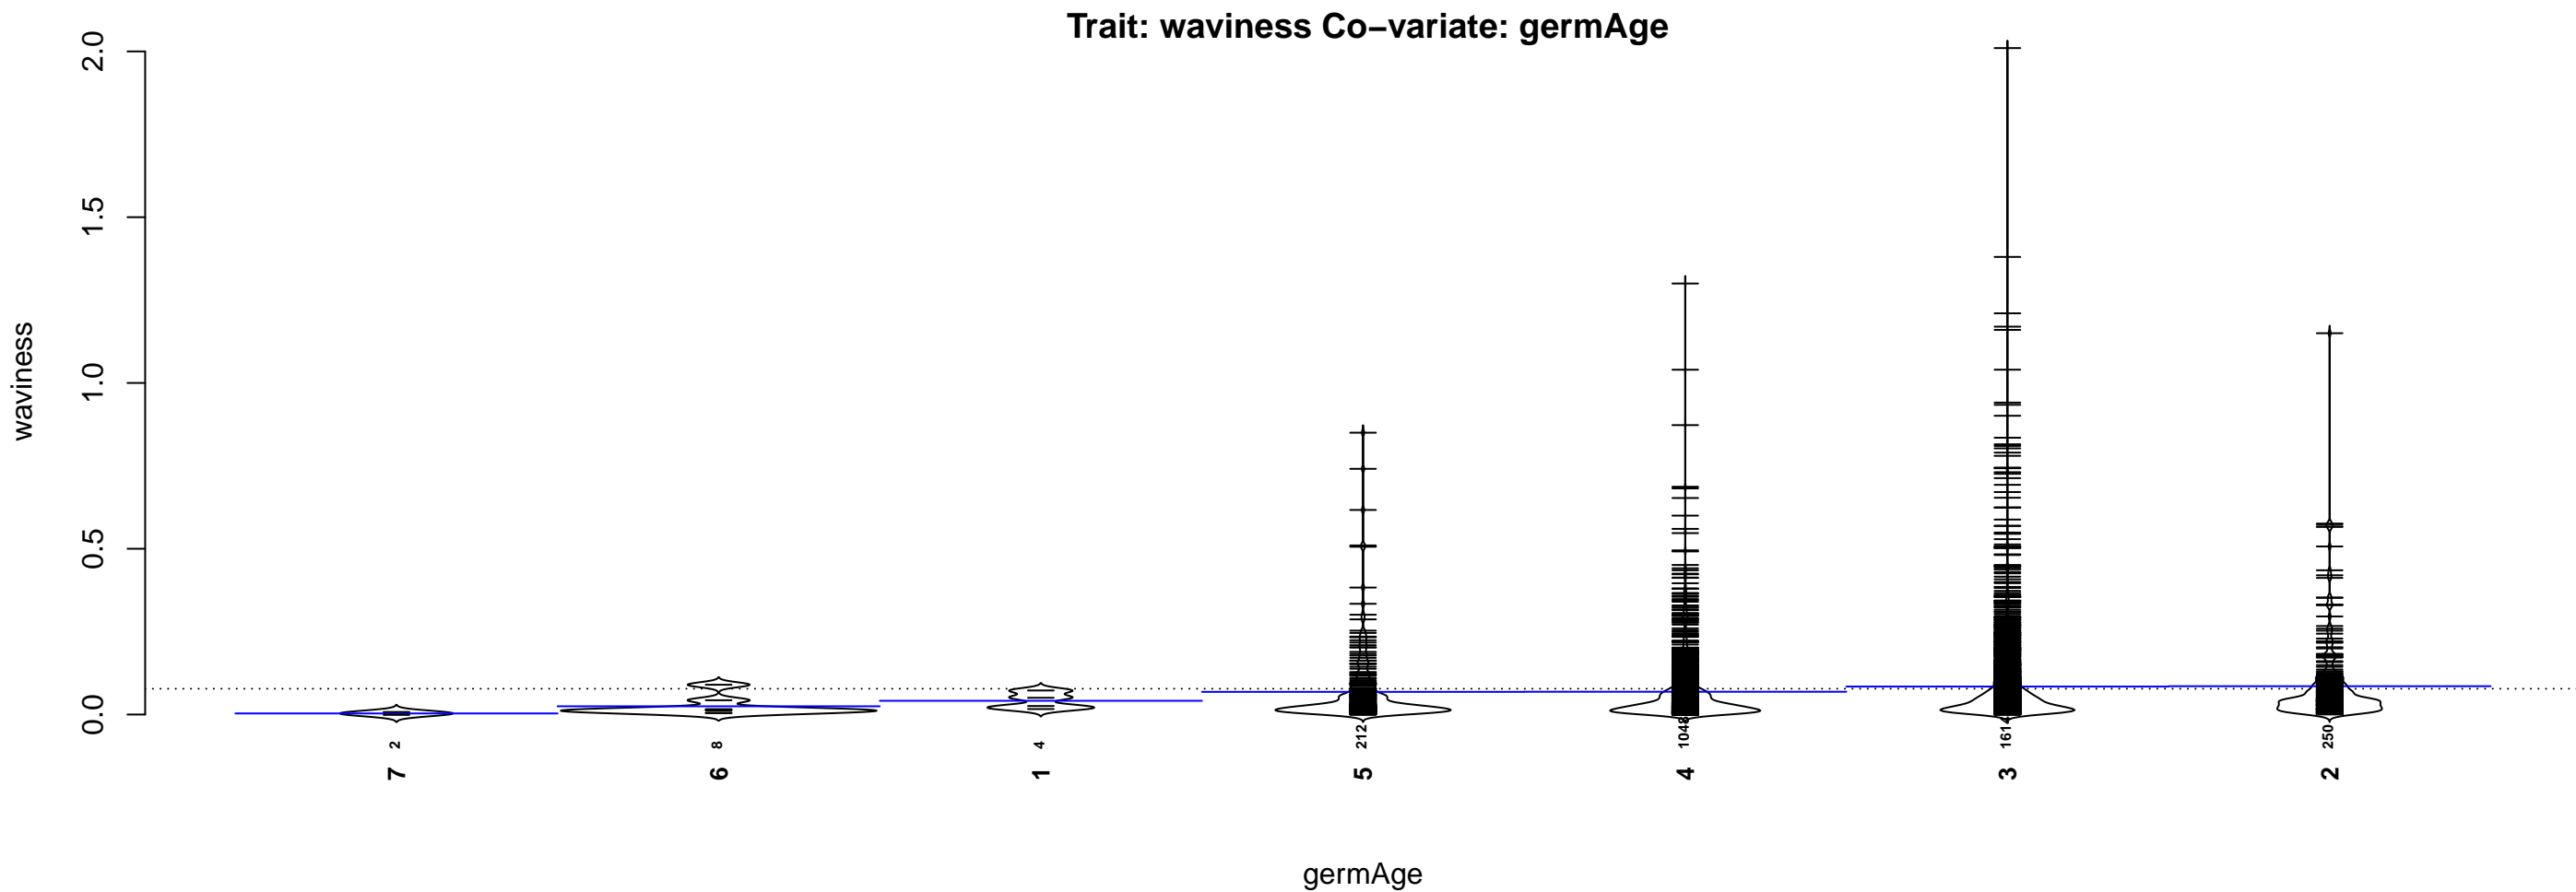

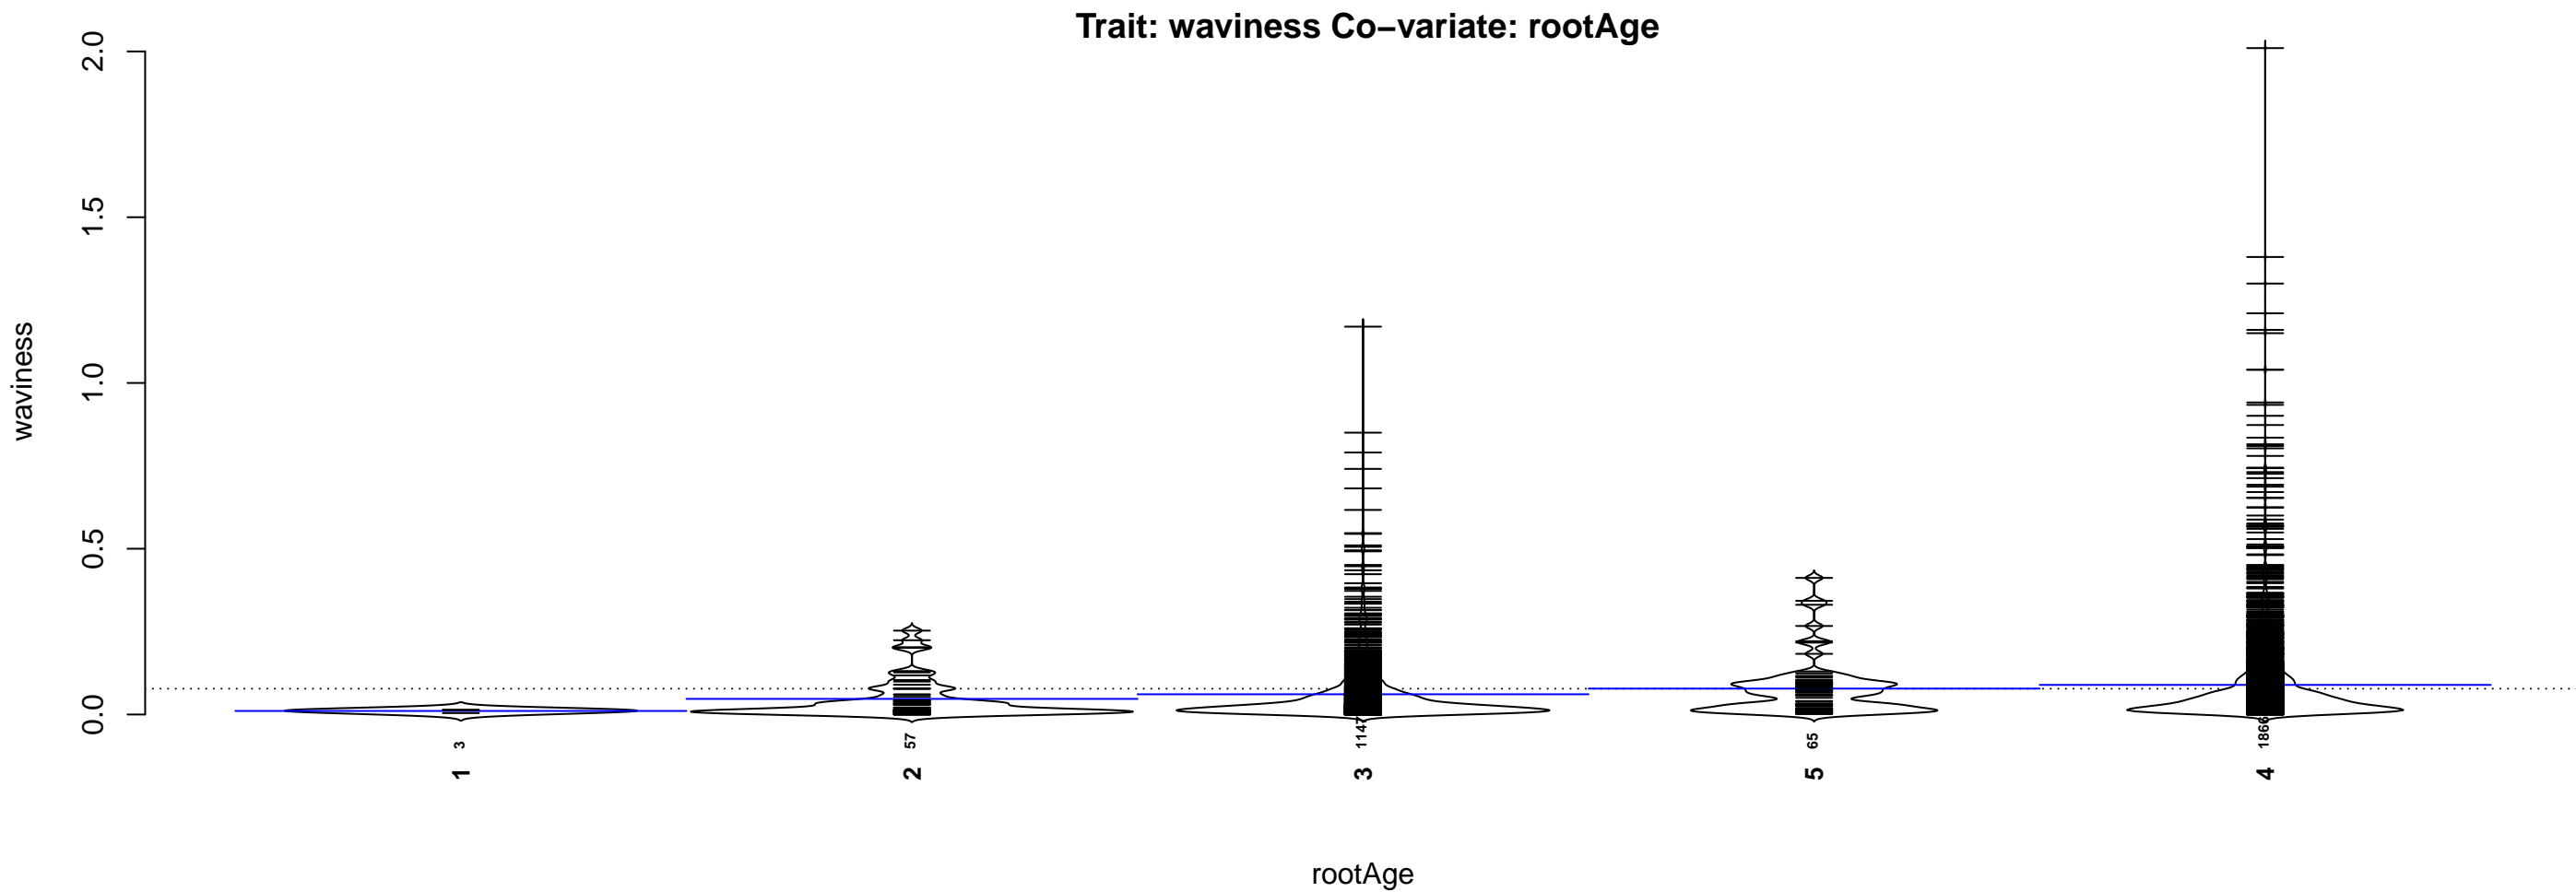

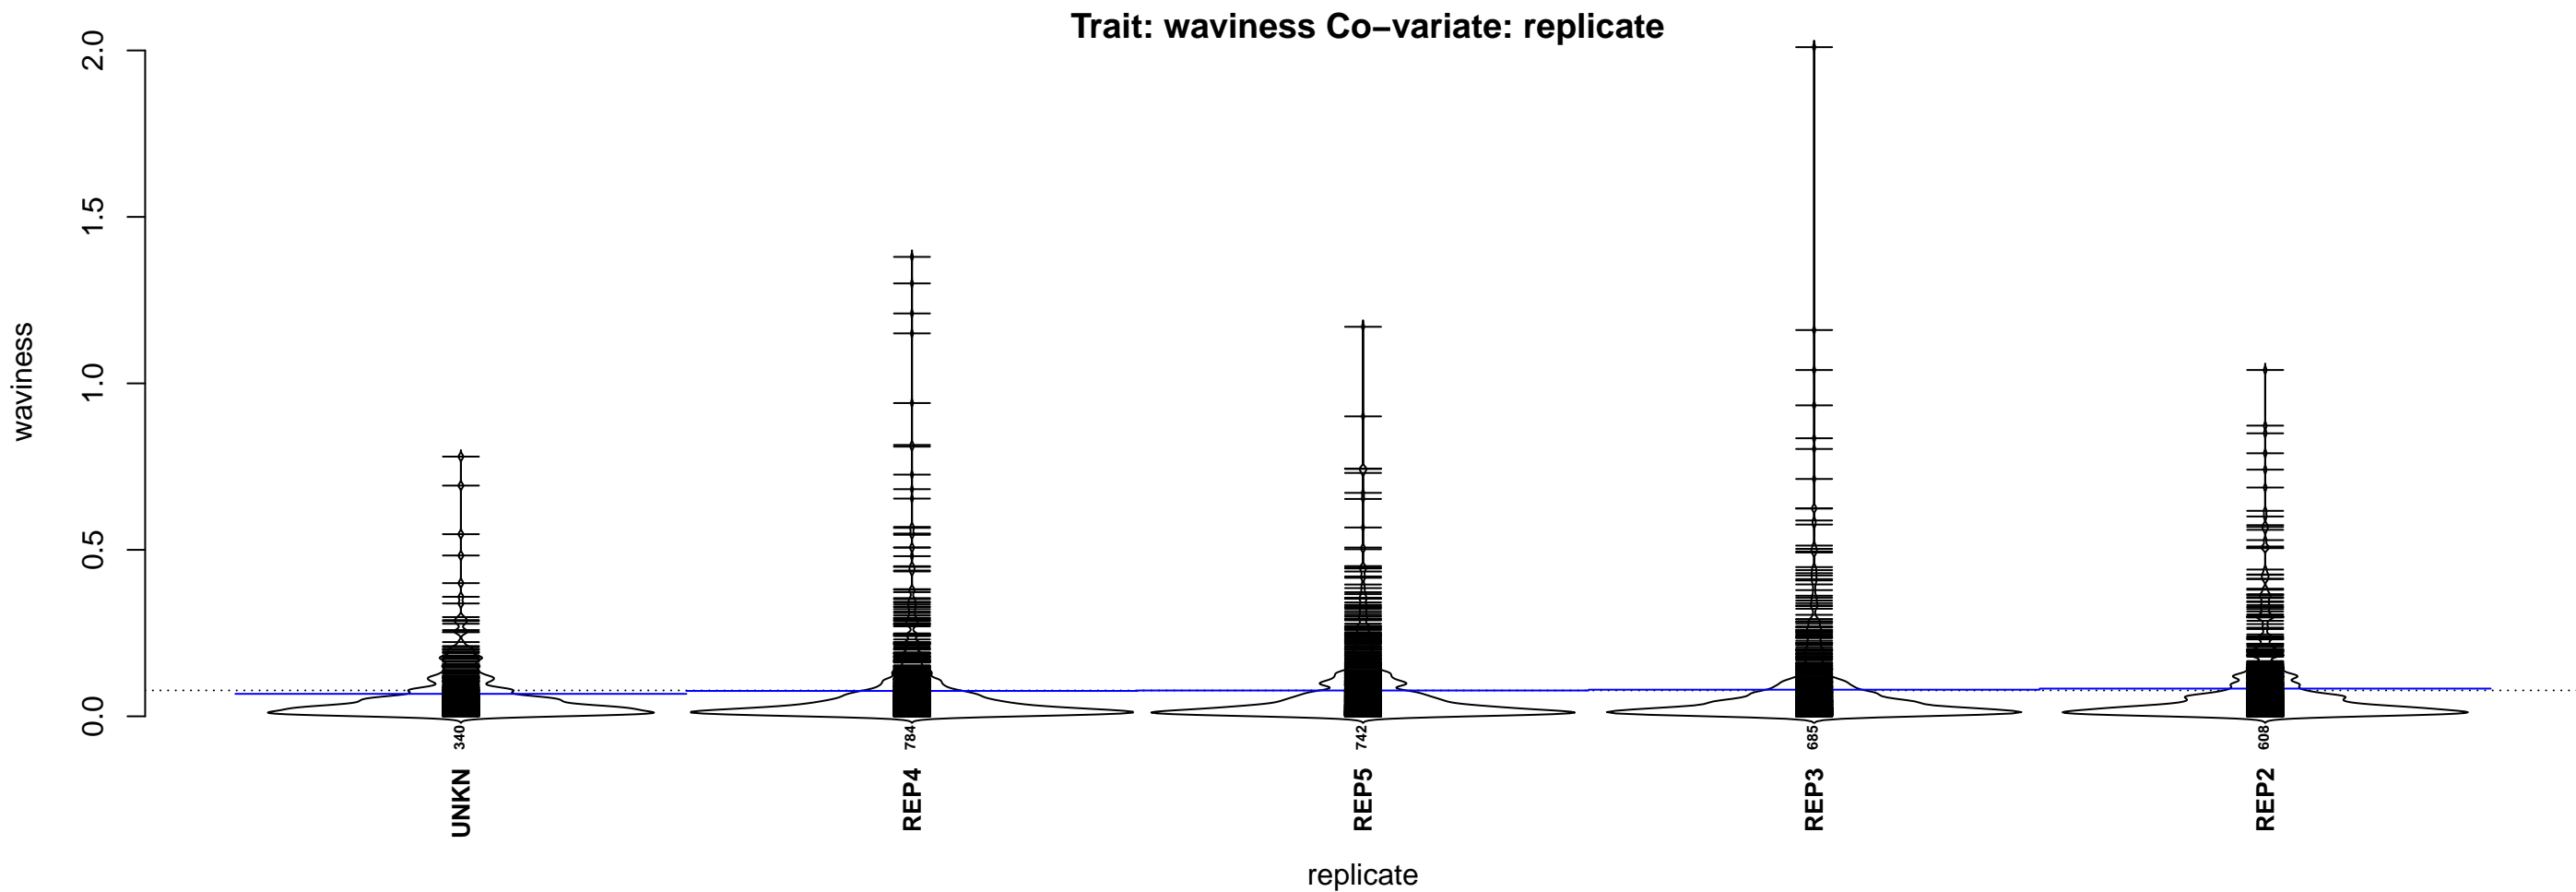

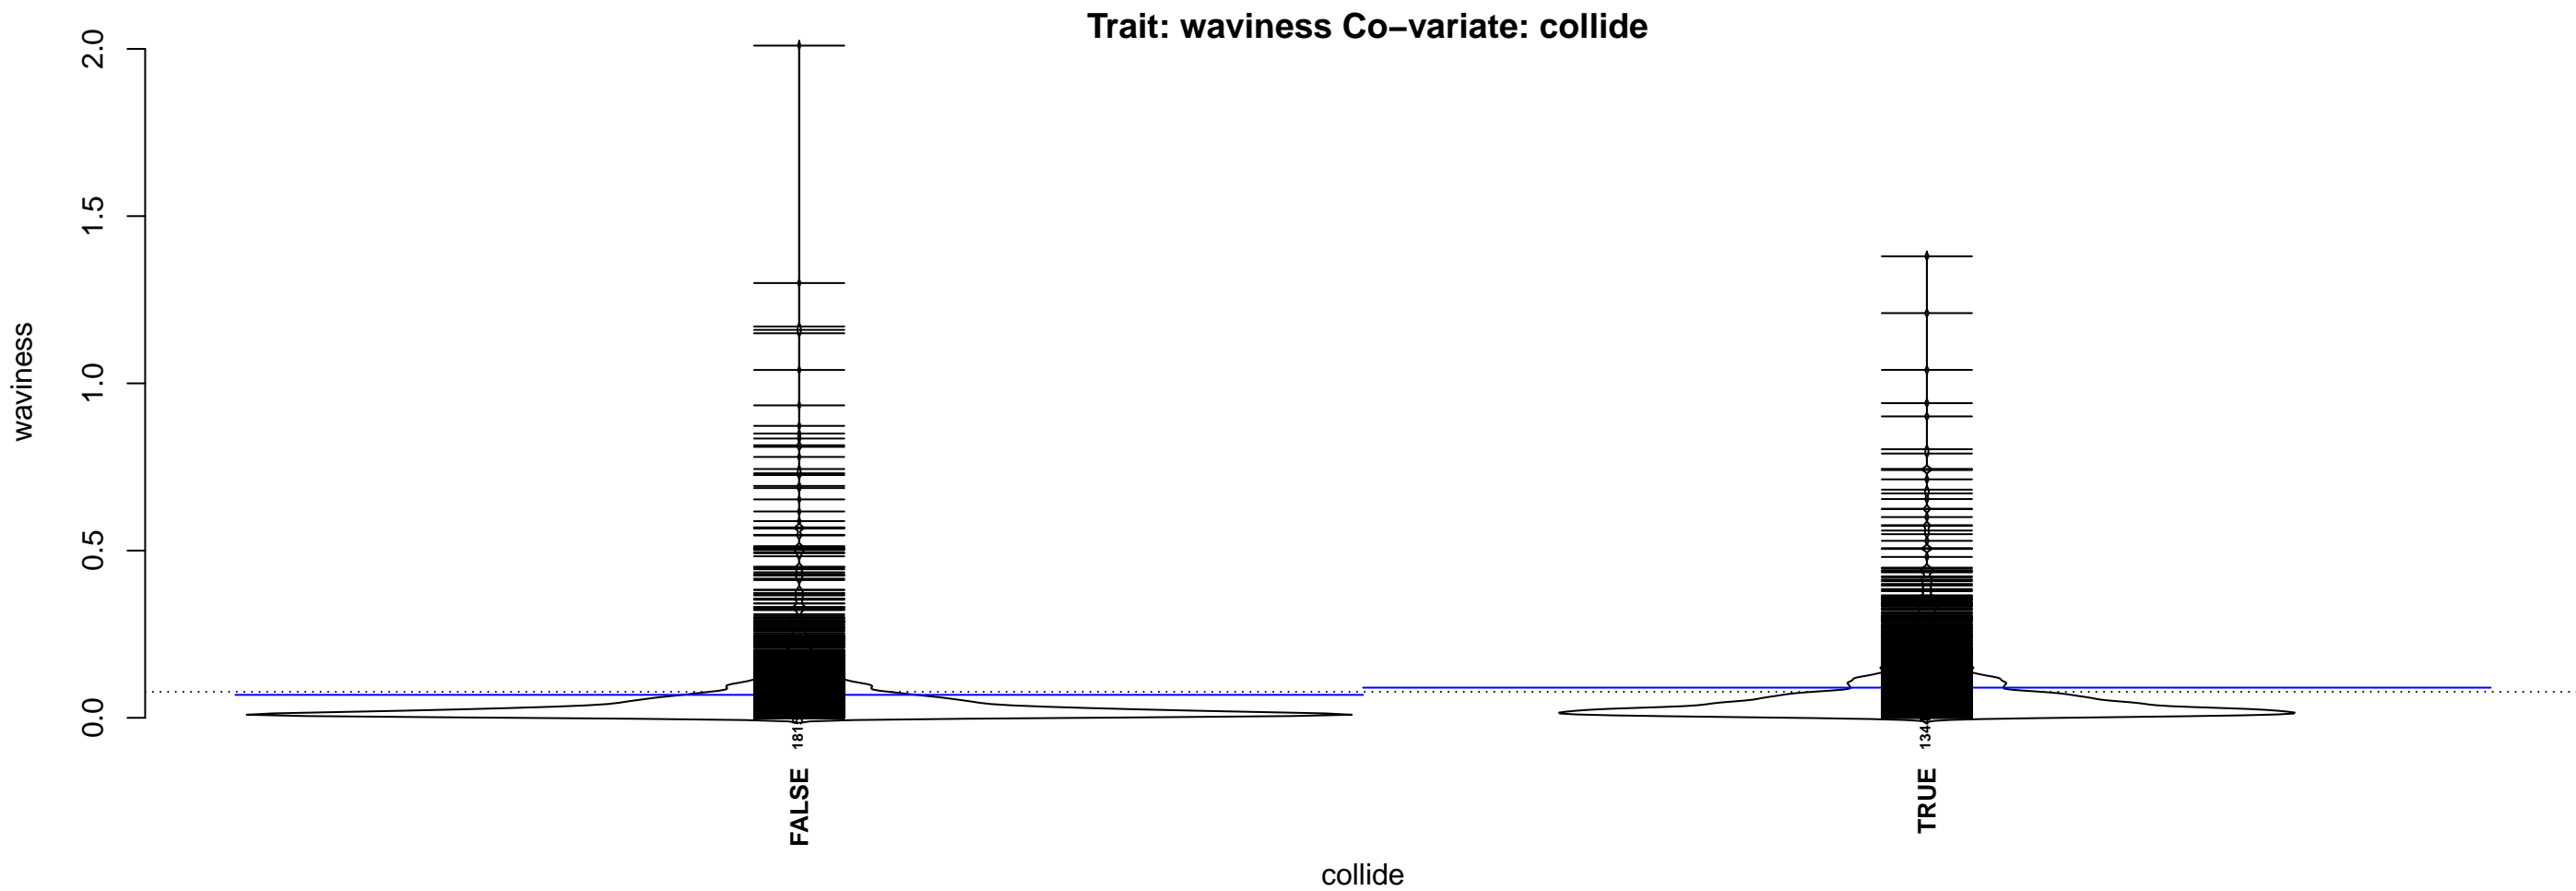

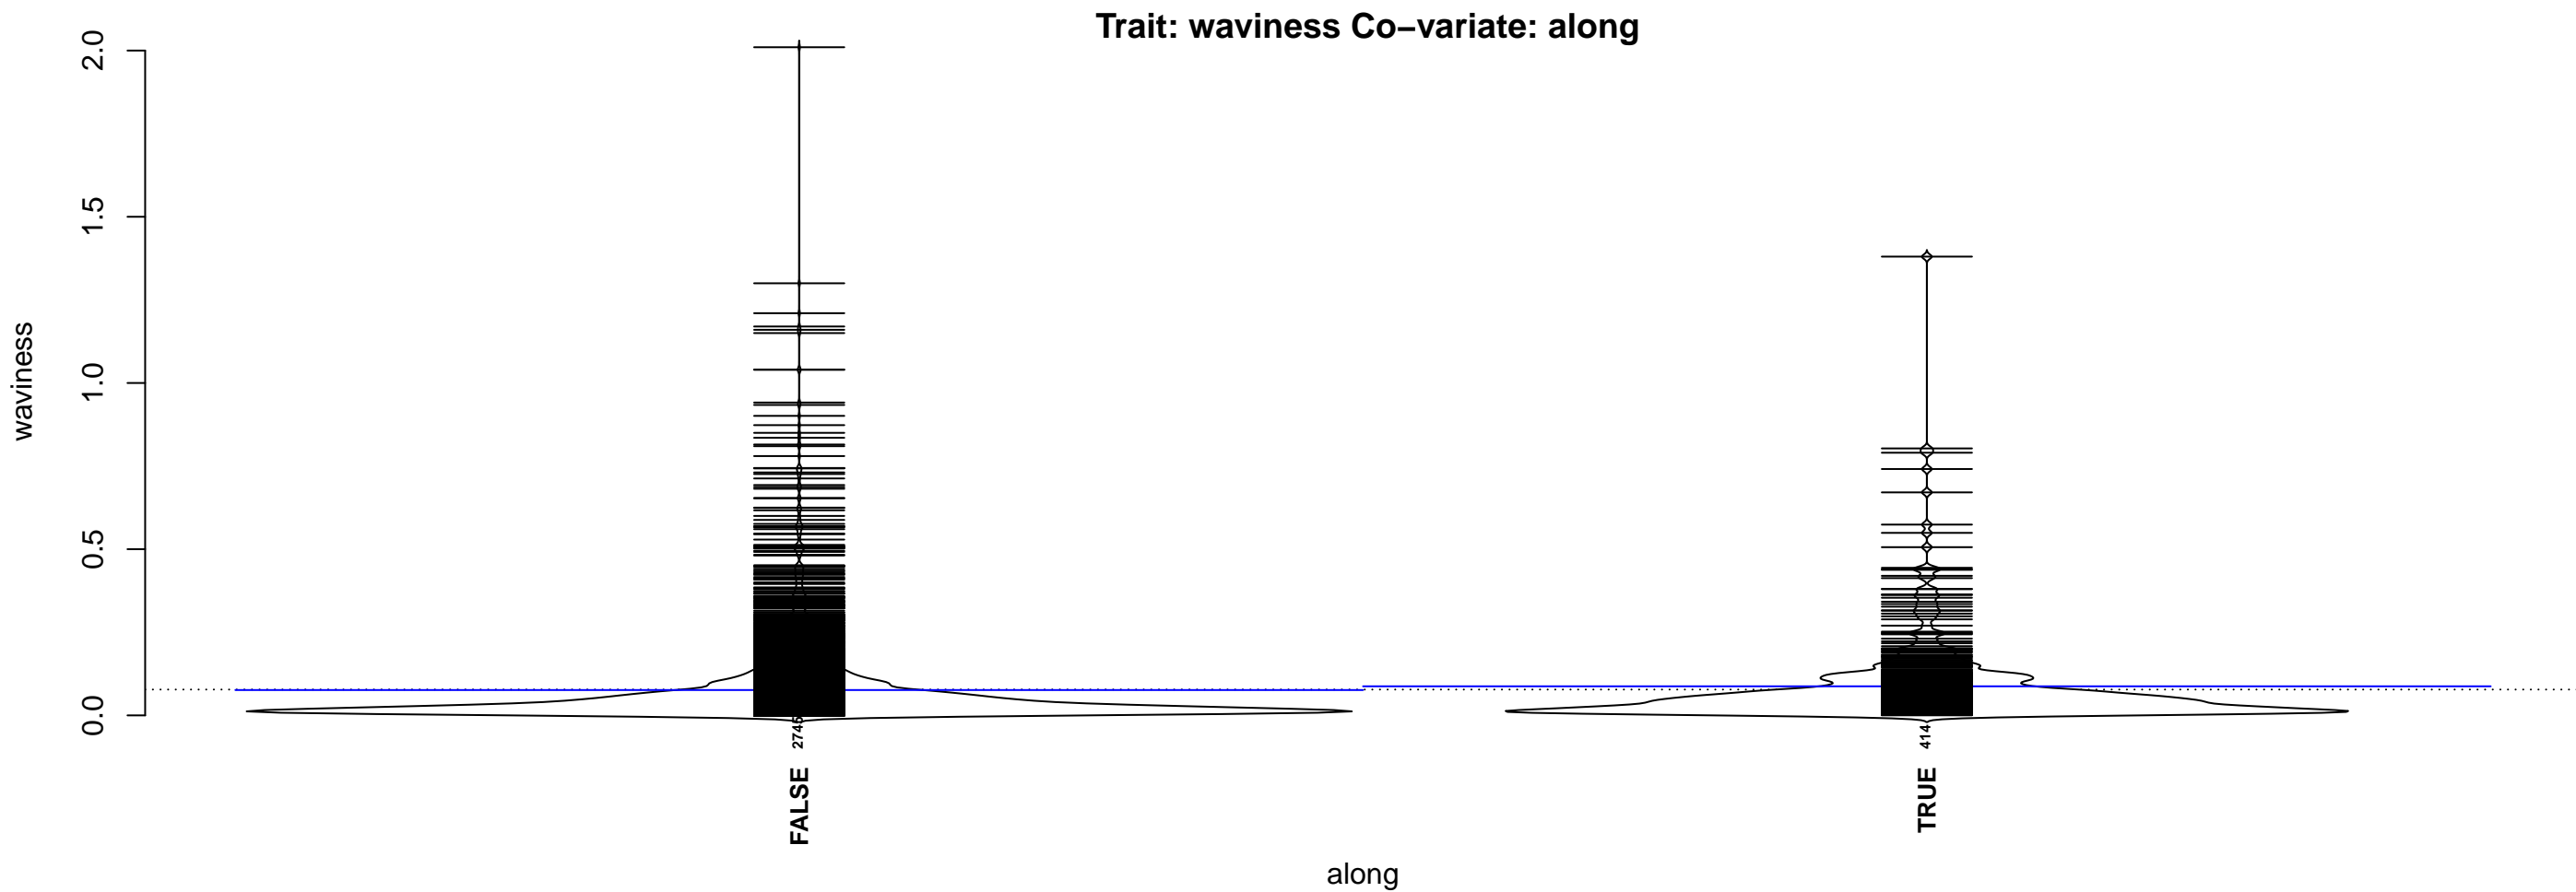

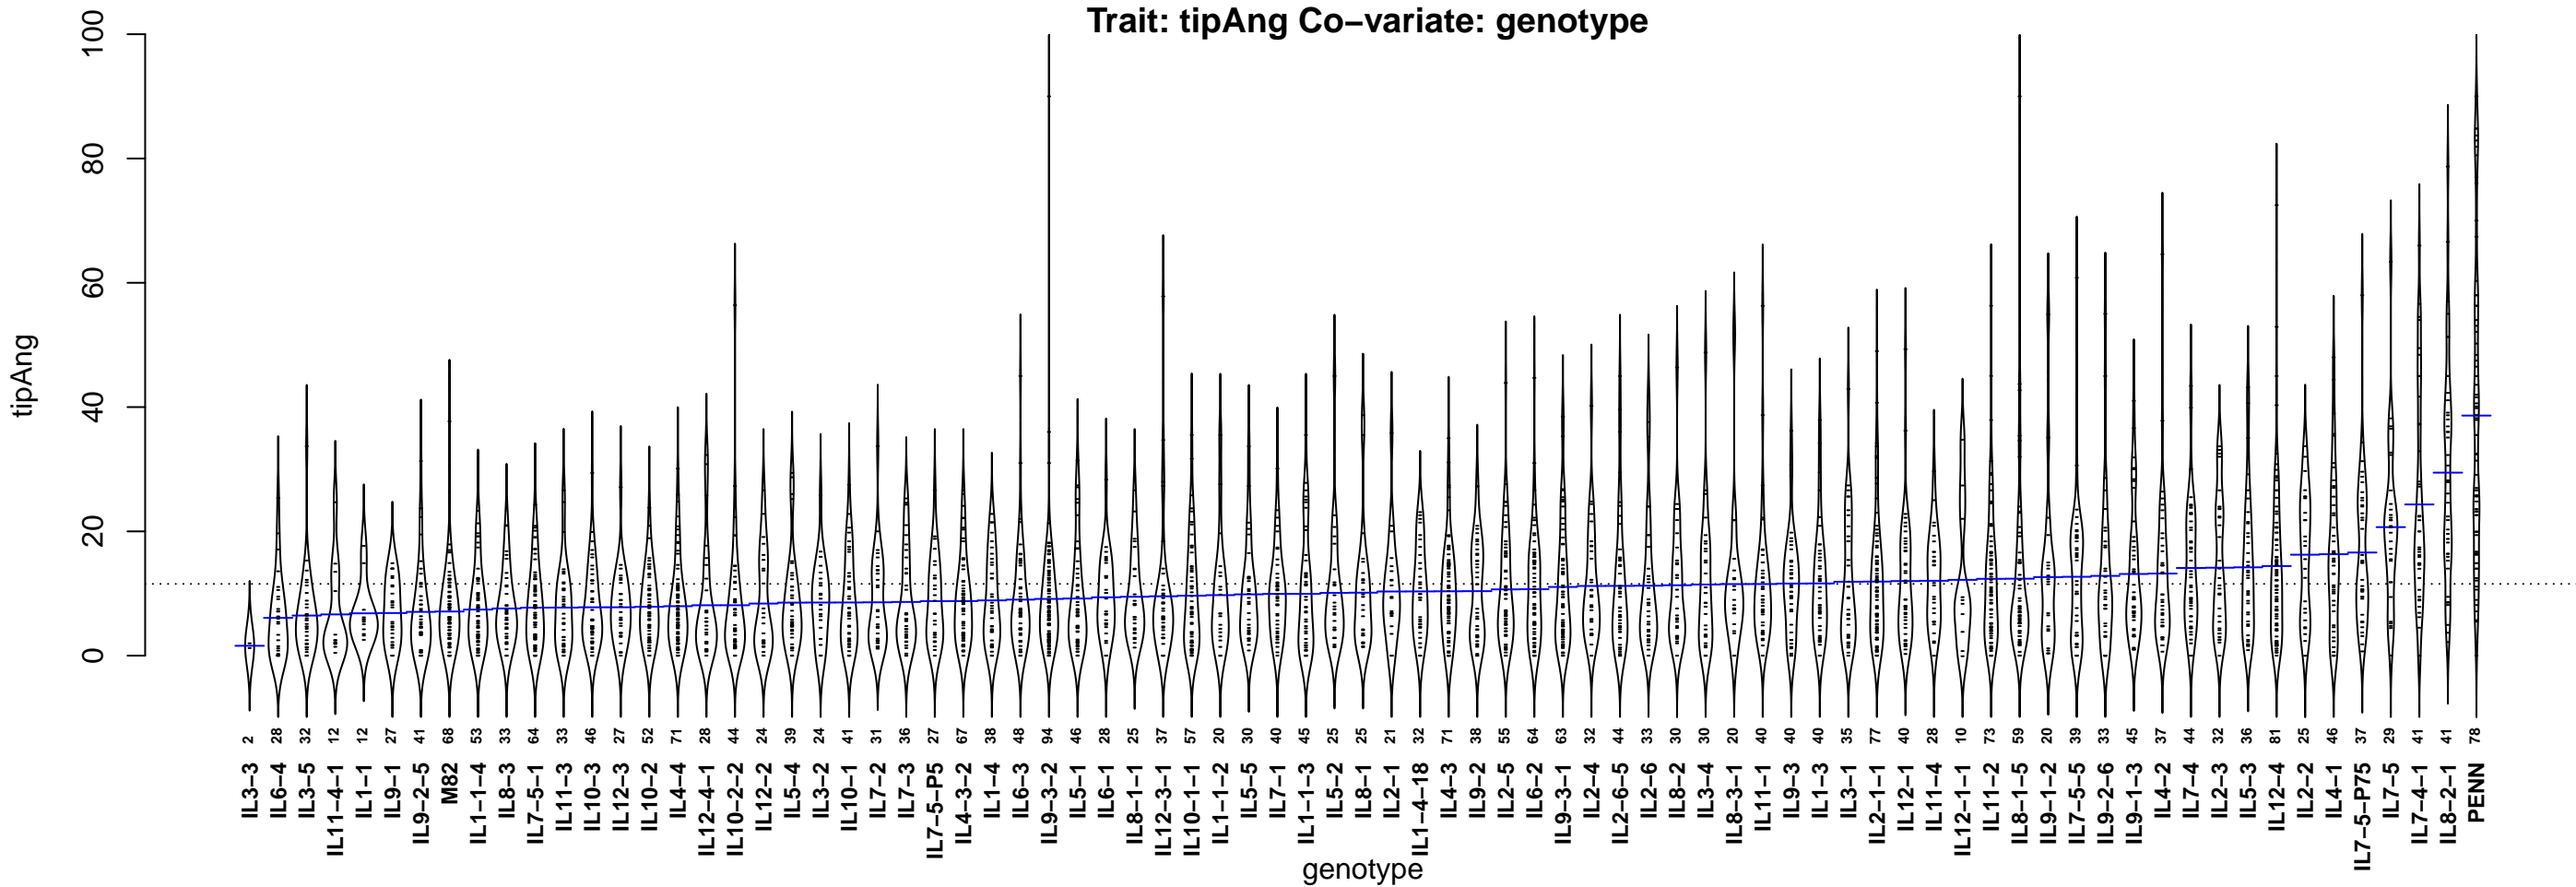

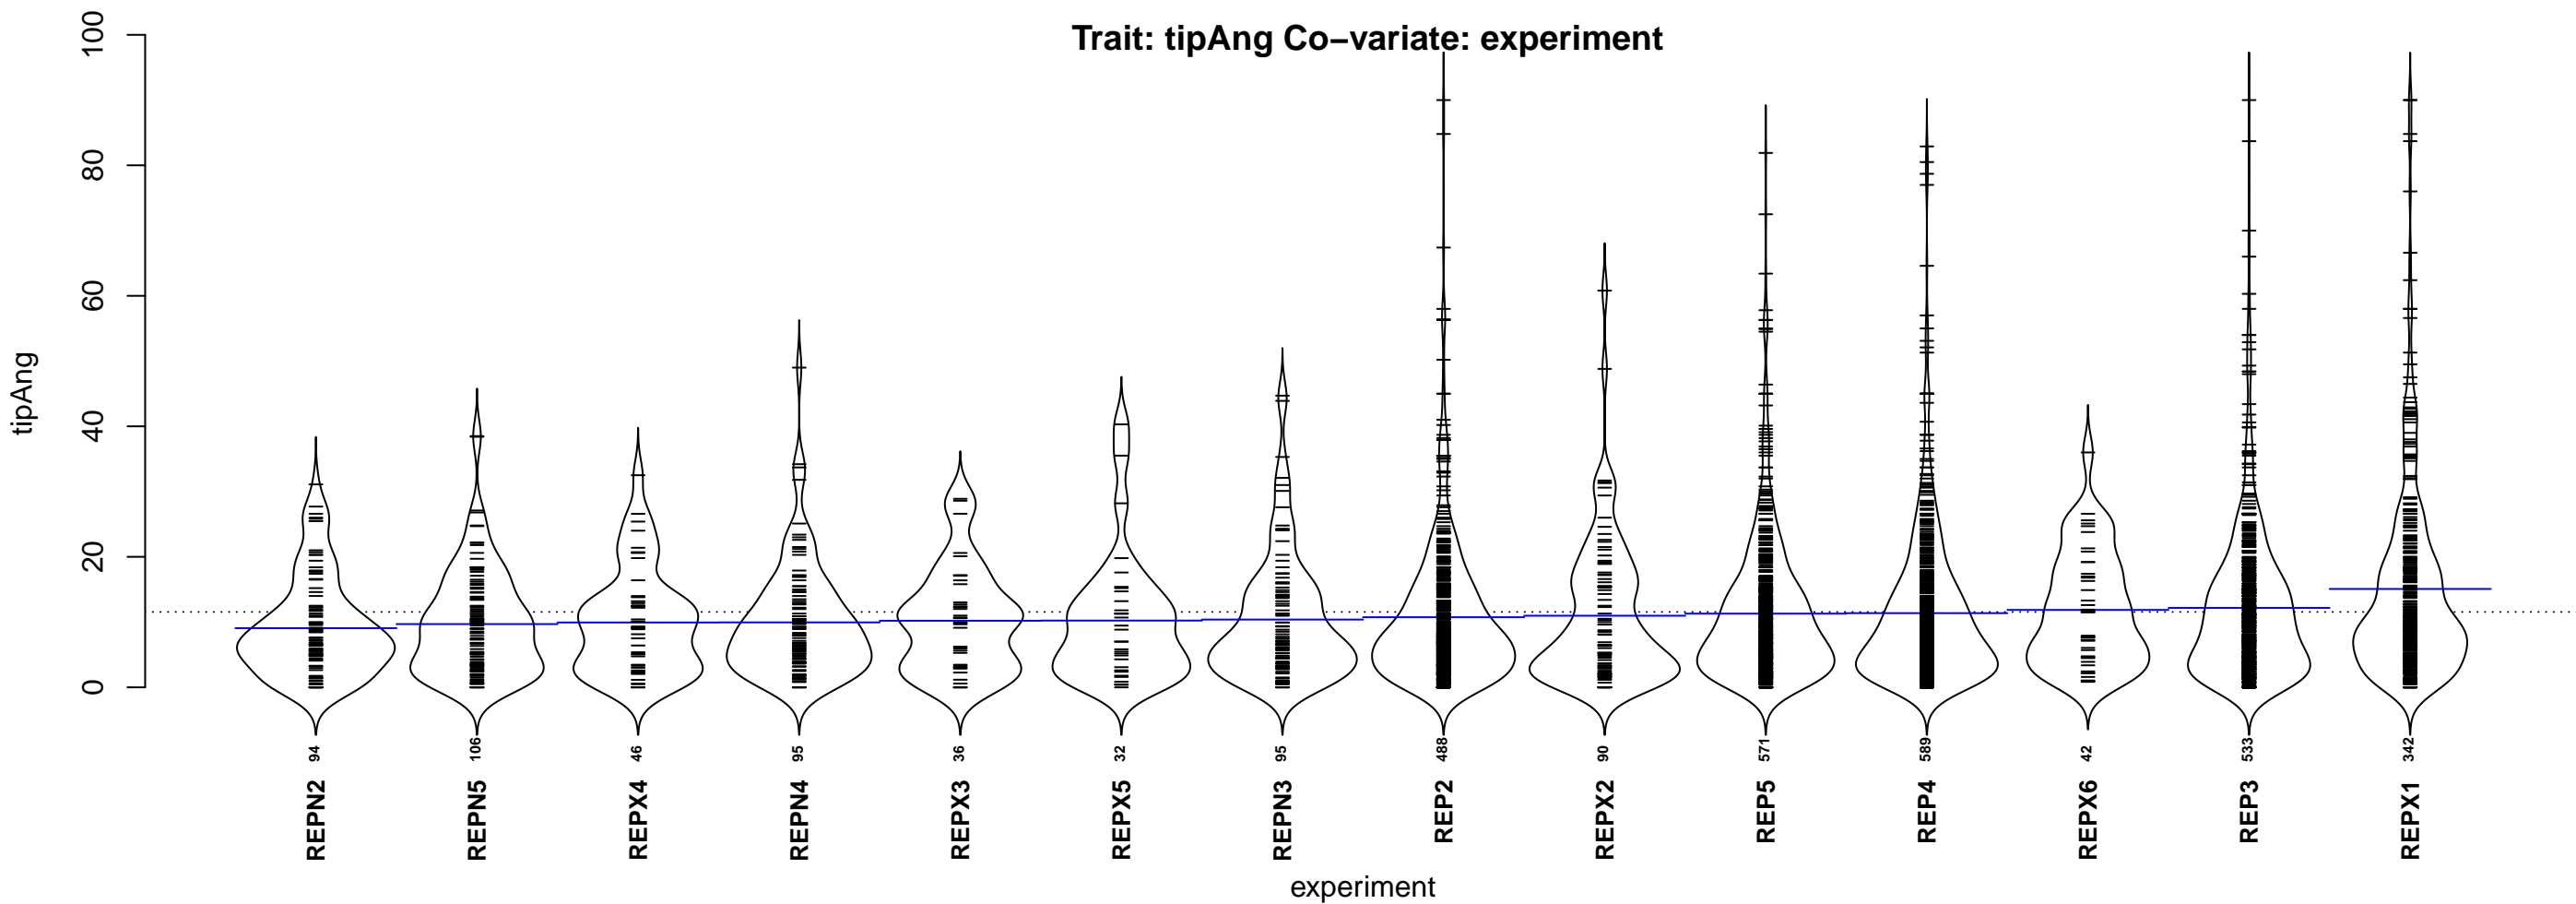

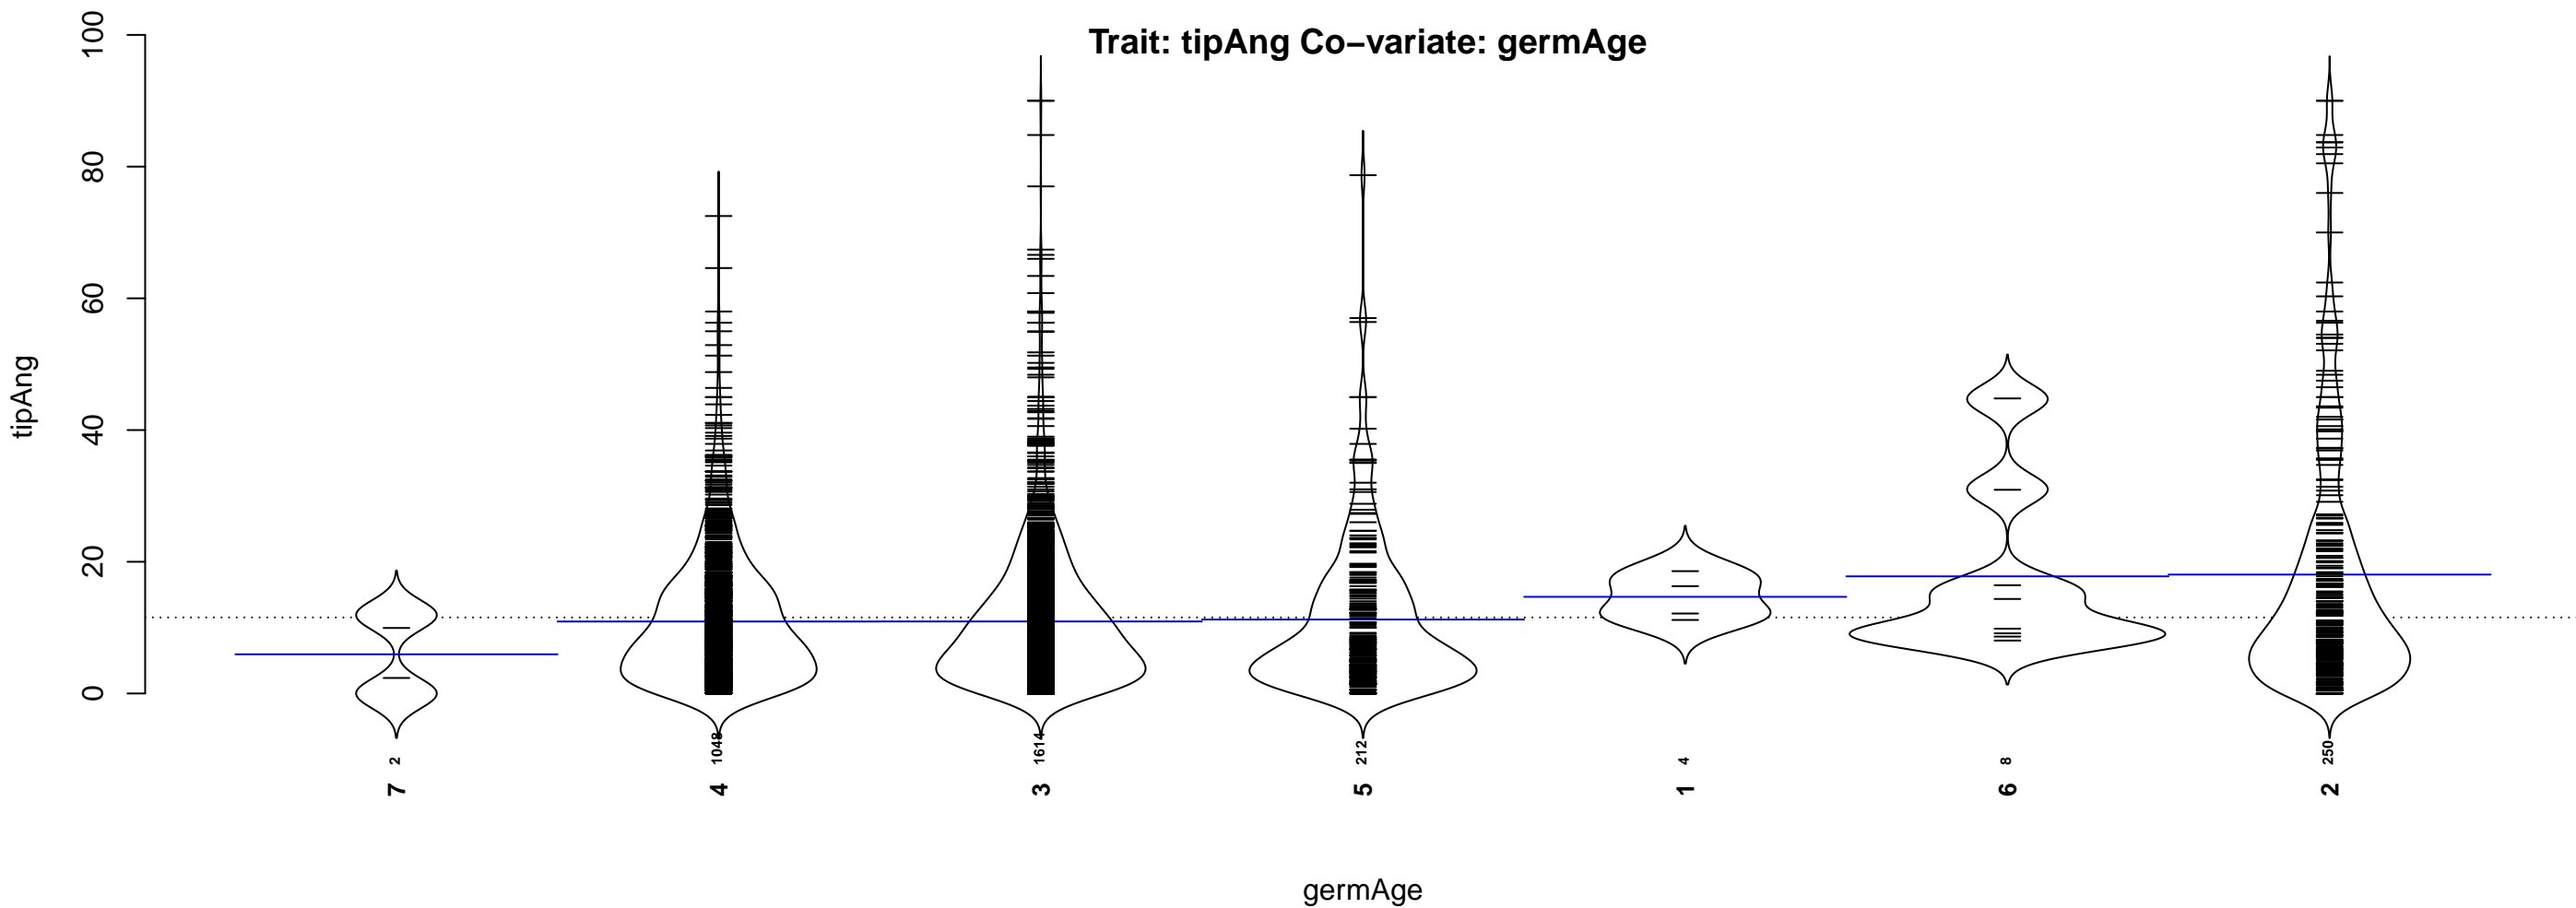

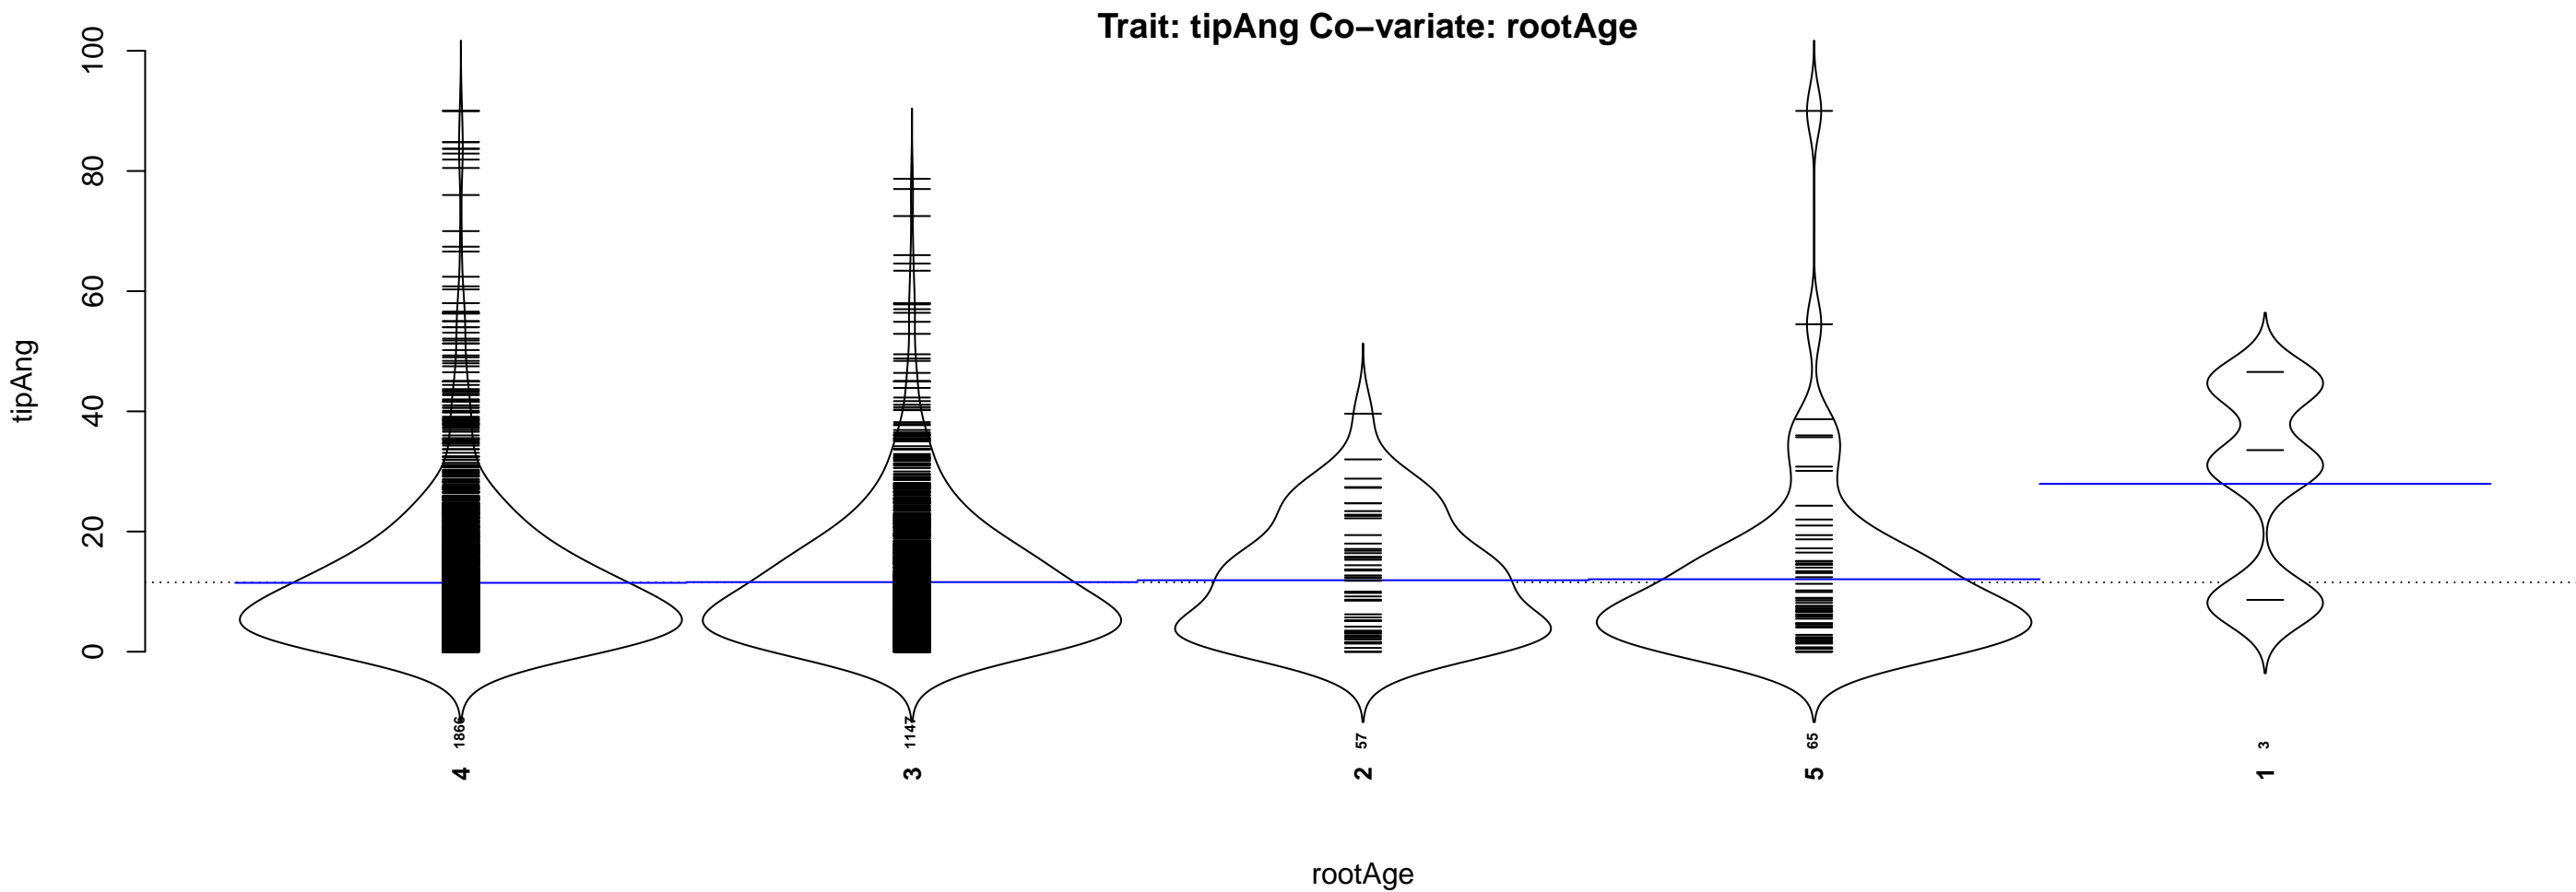

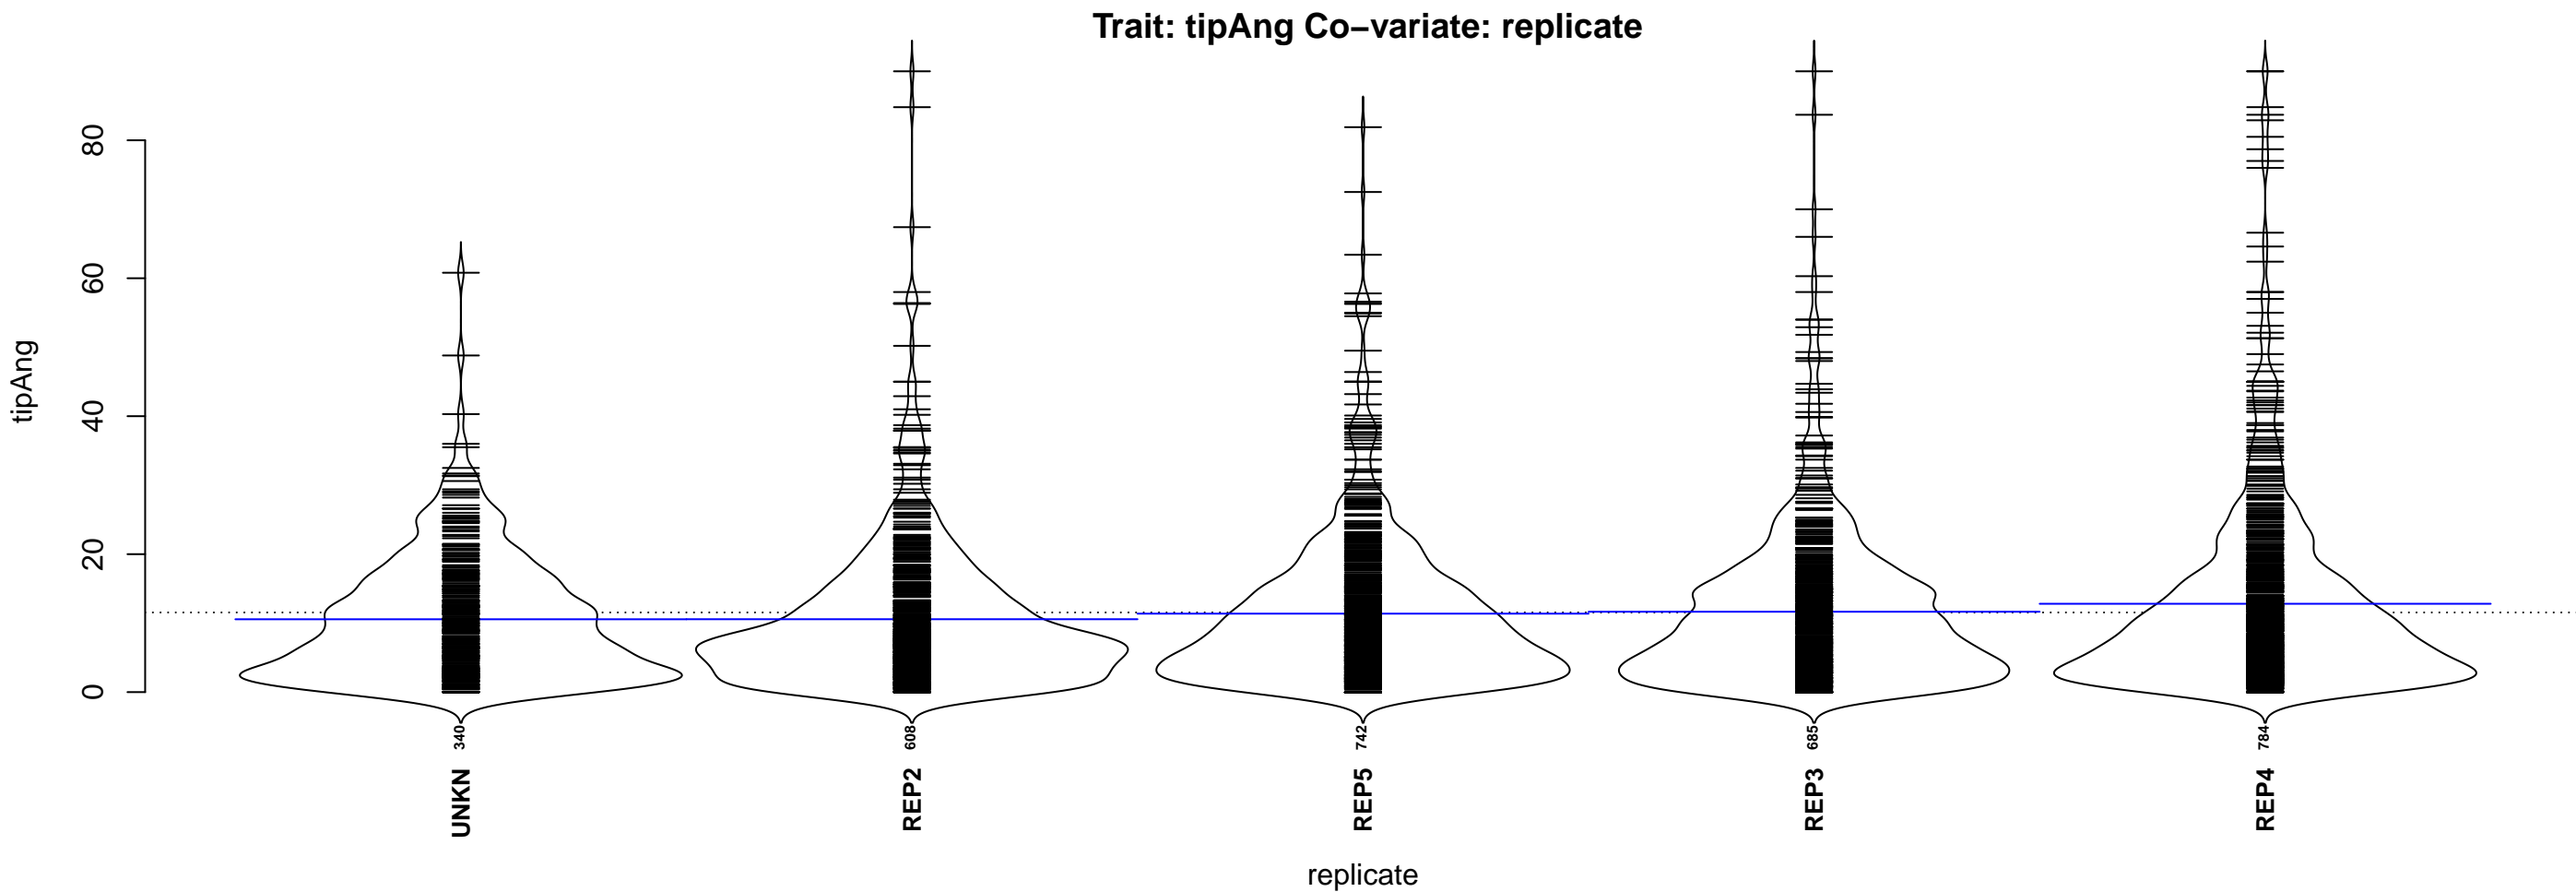

Trait: tipAng Co-variate: collide

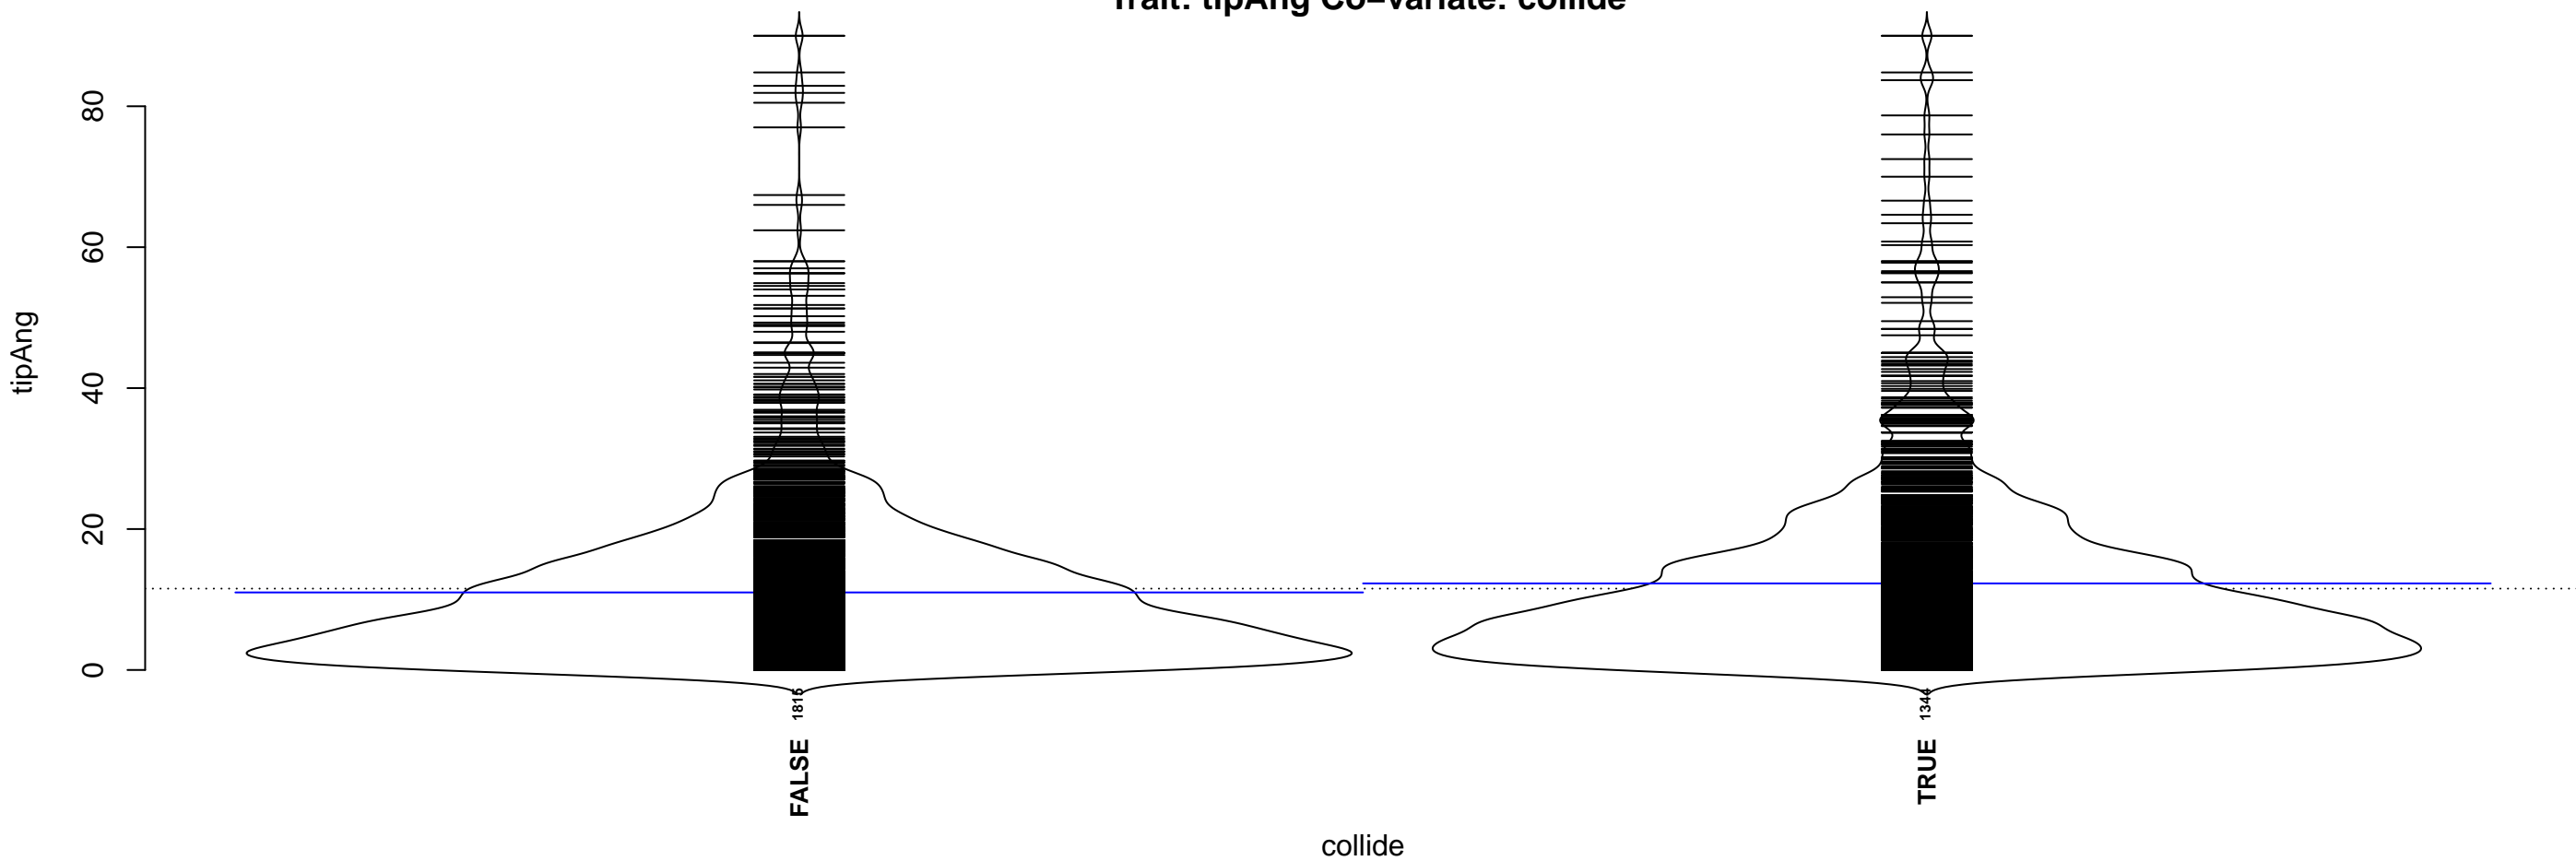

Trait: tipAng Co-variate: along

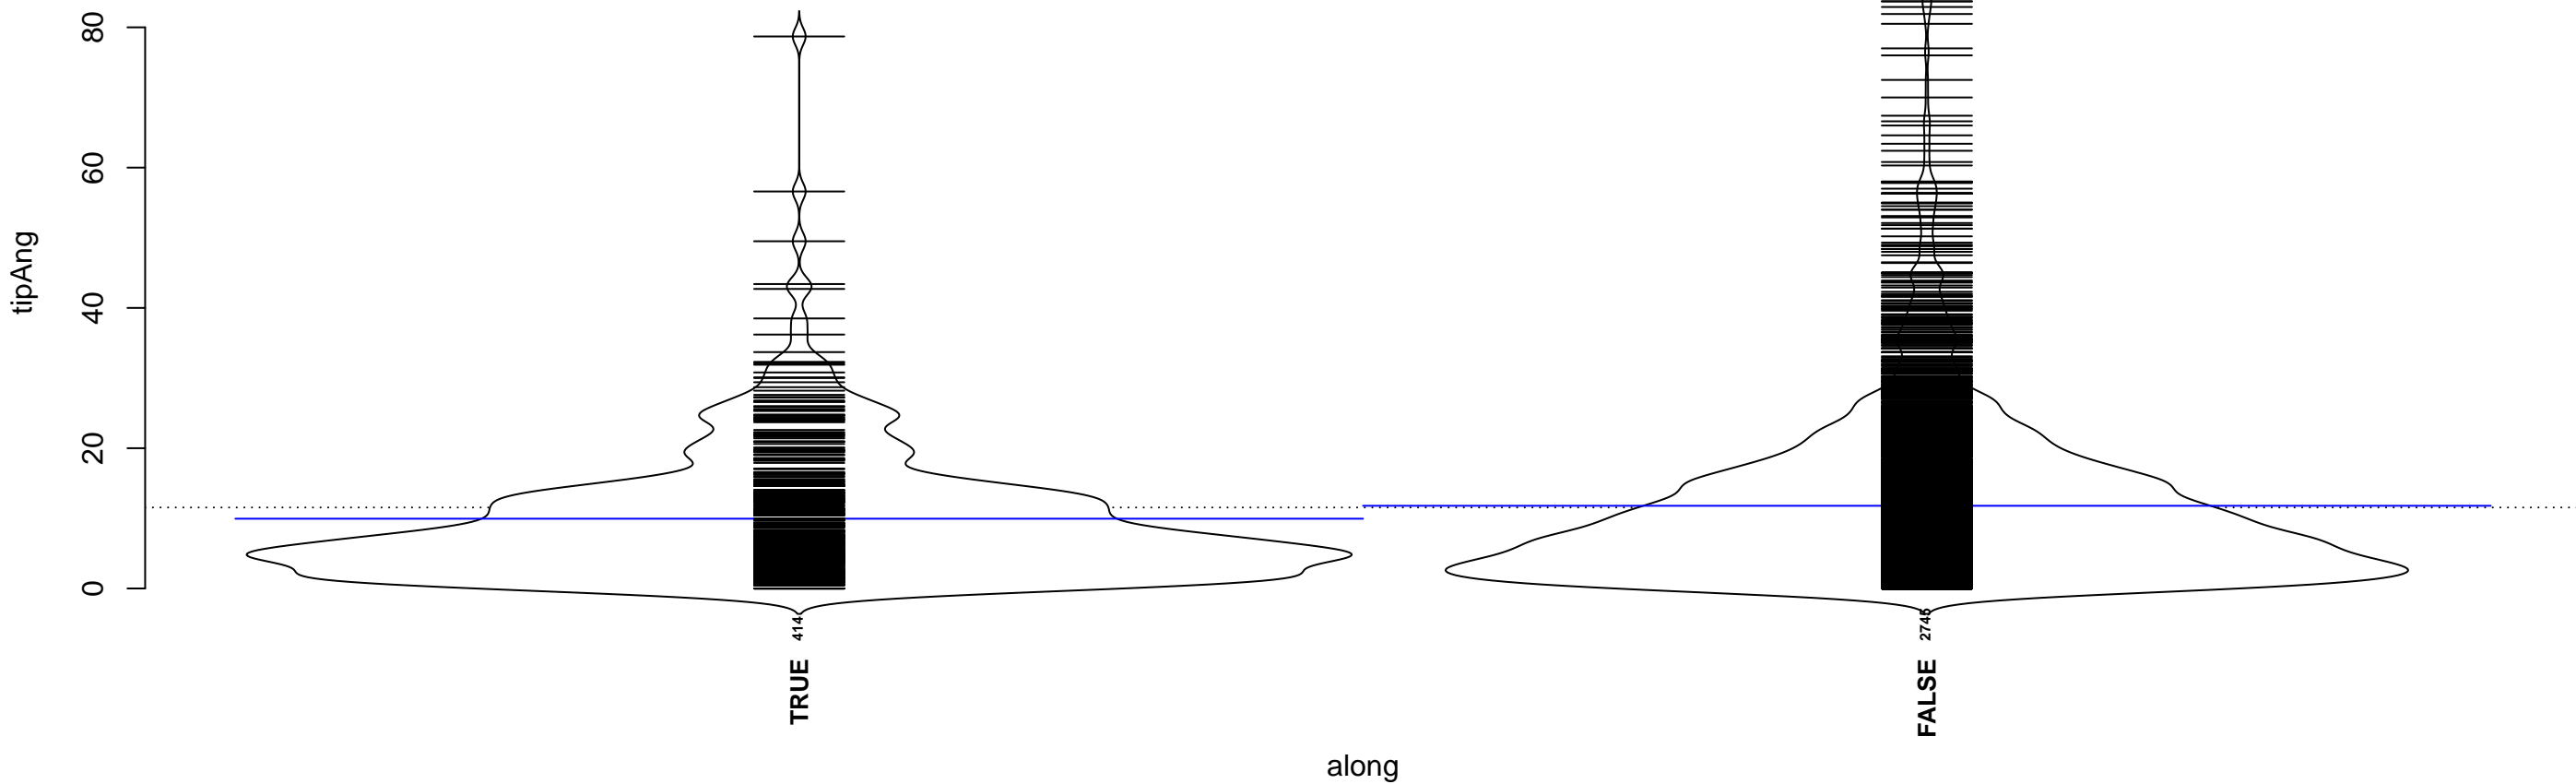

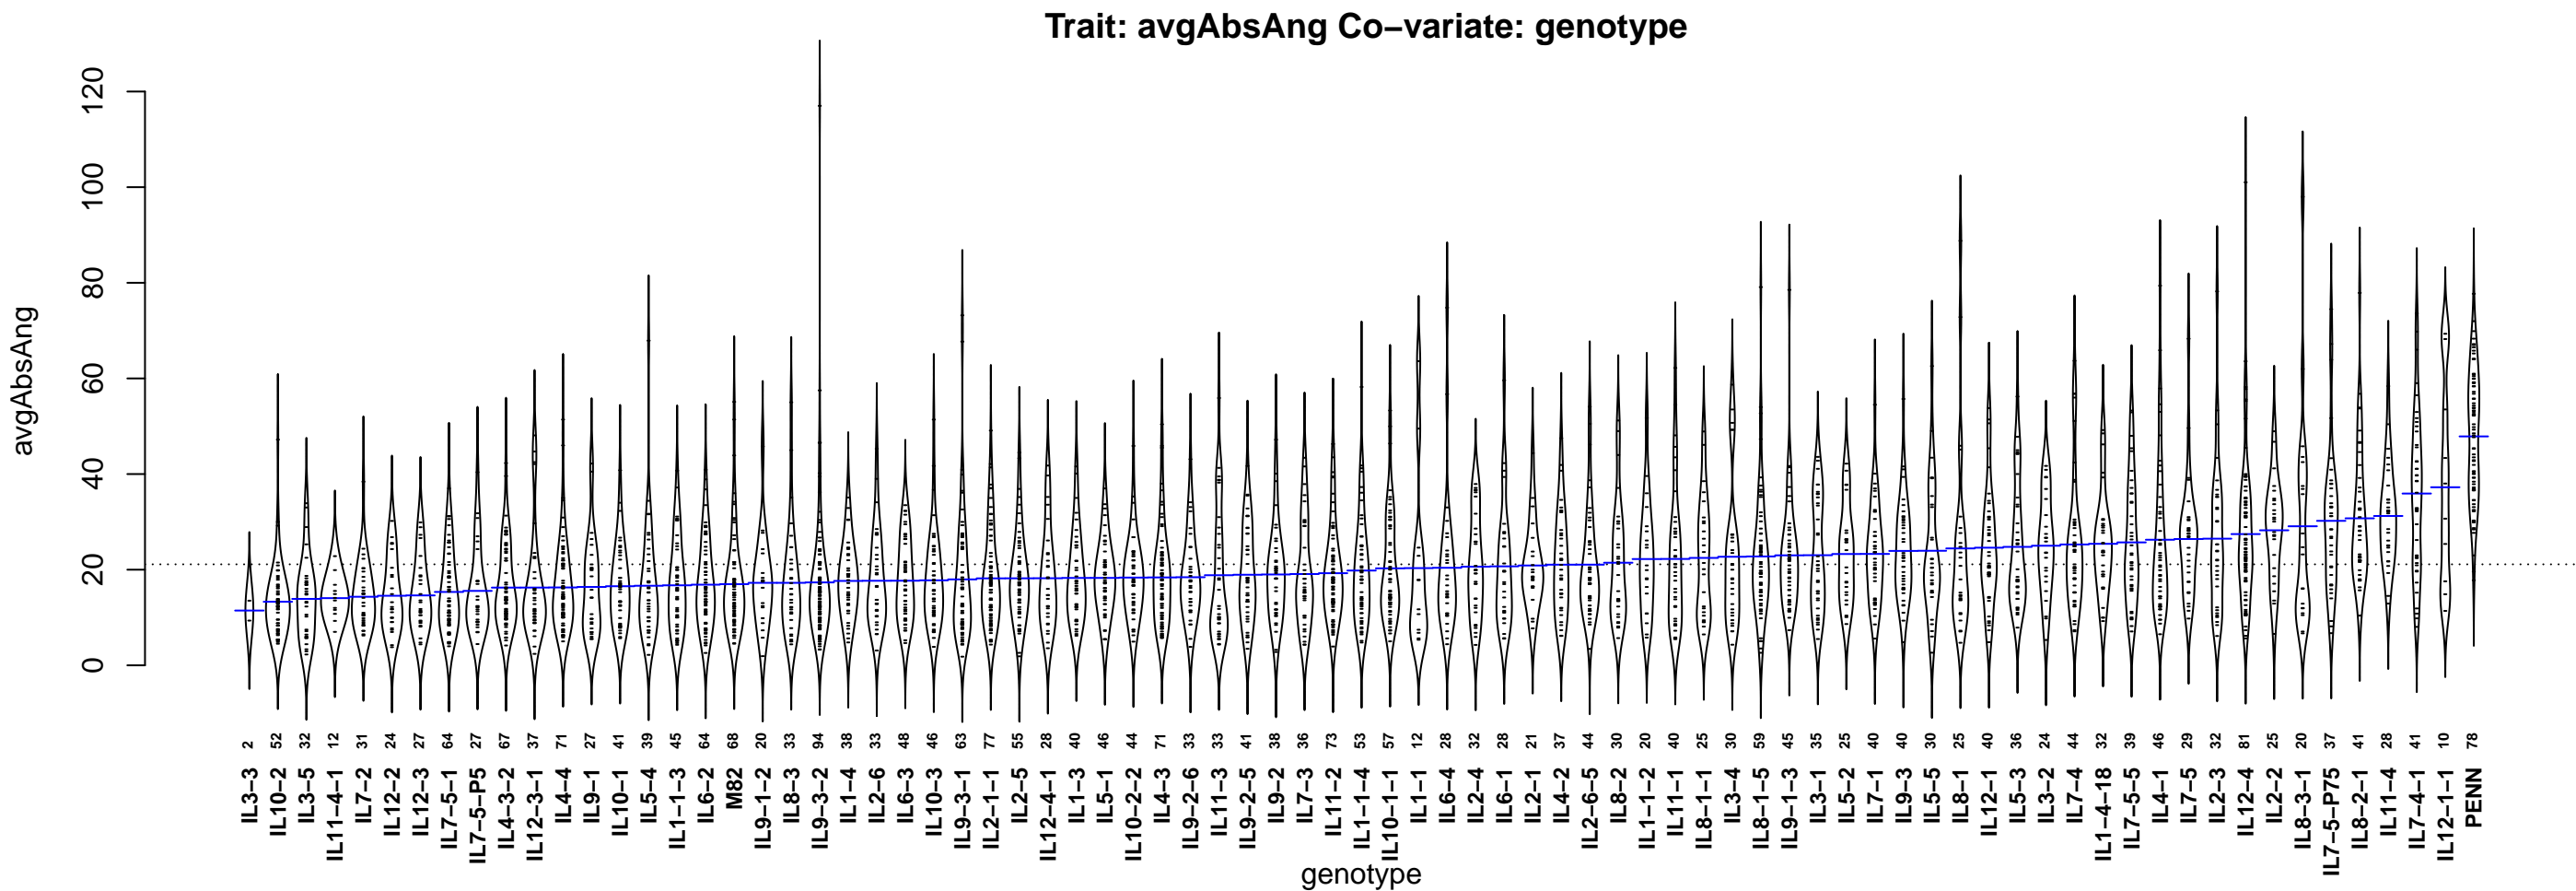

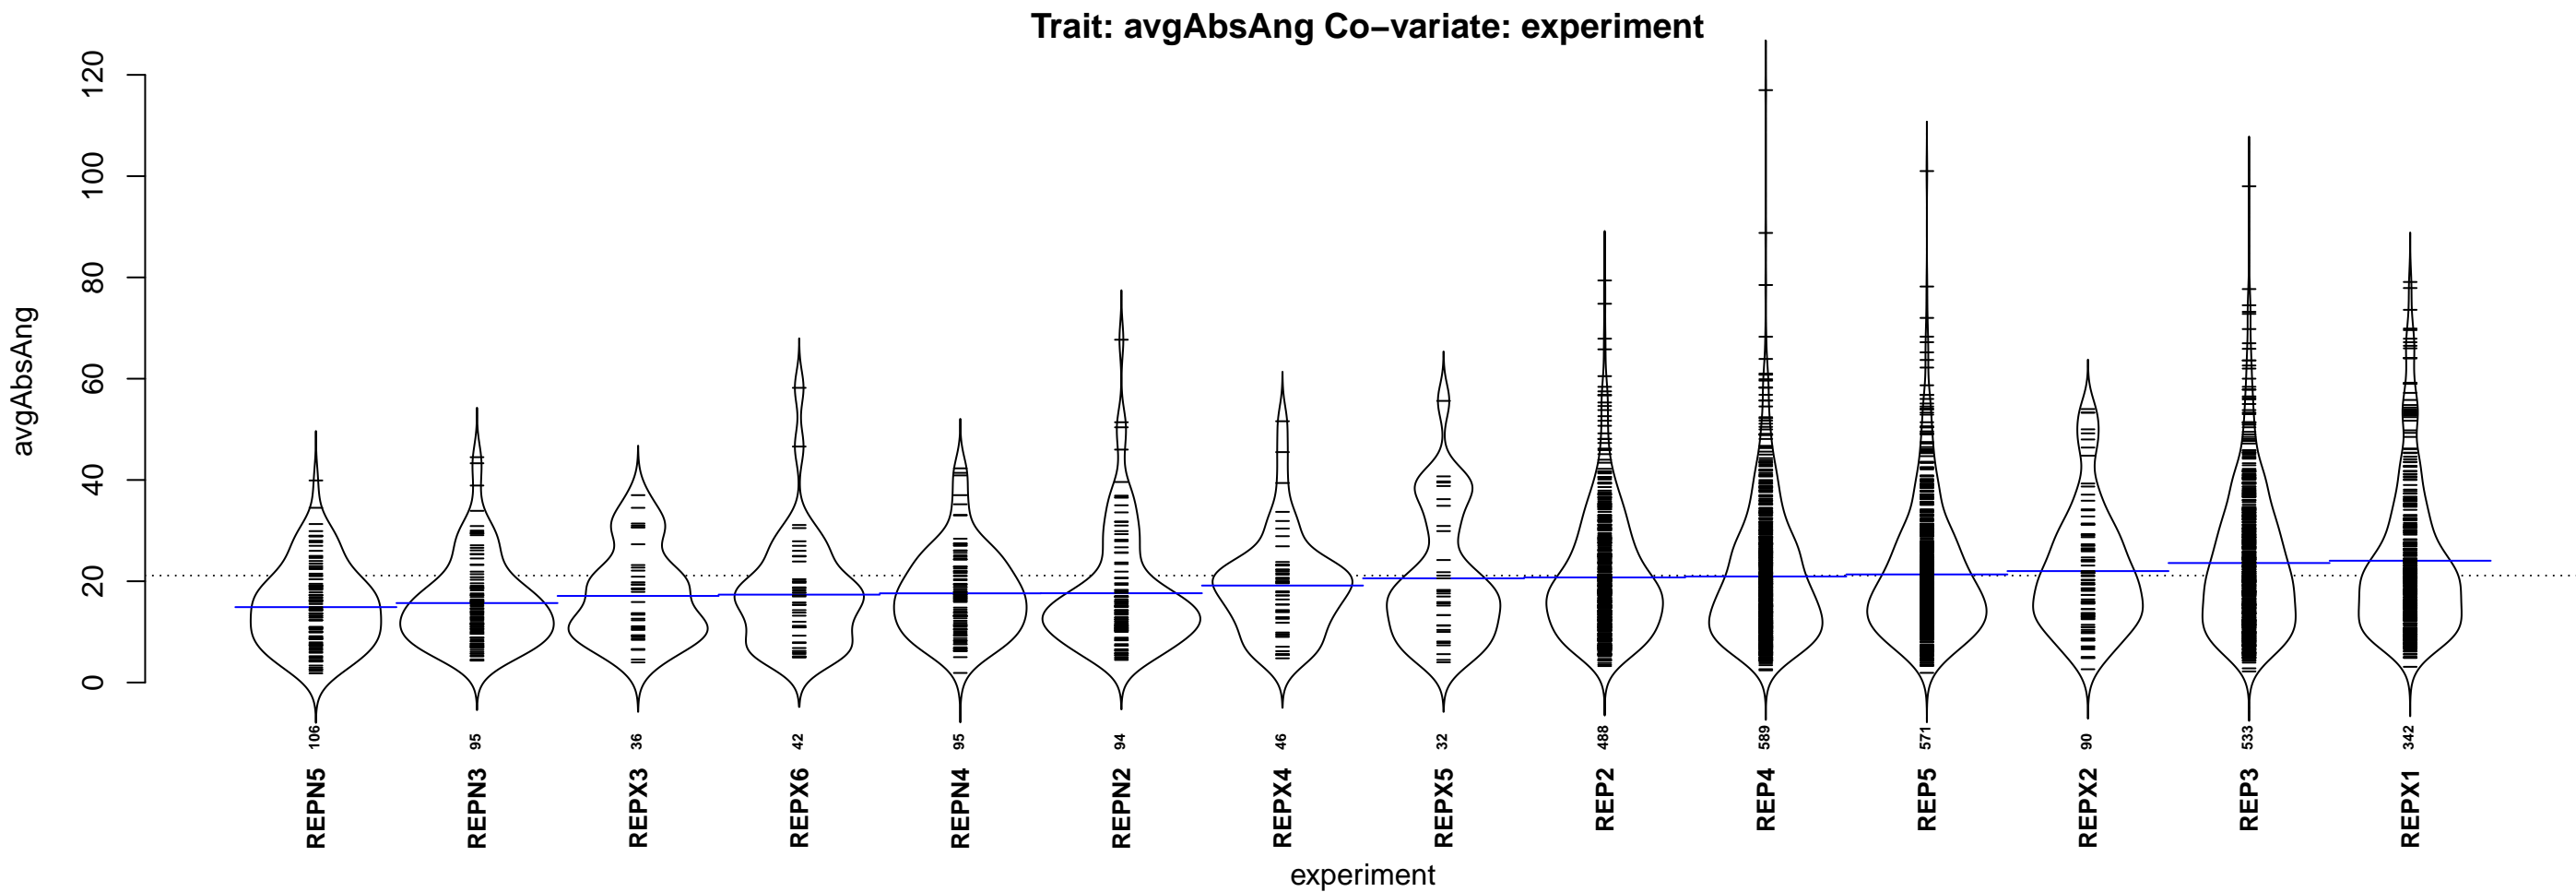

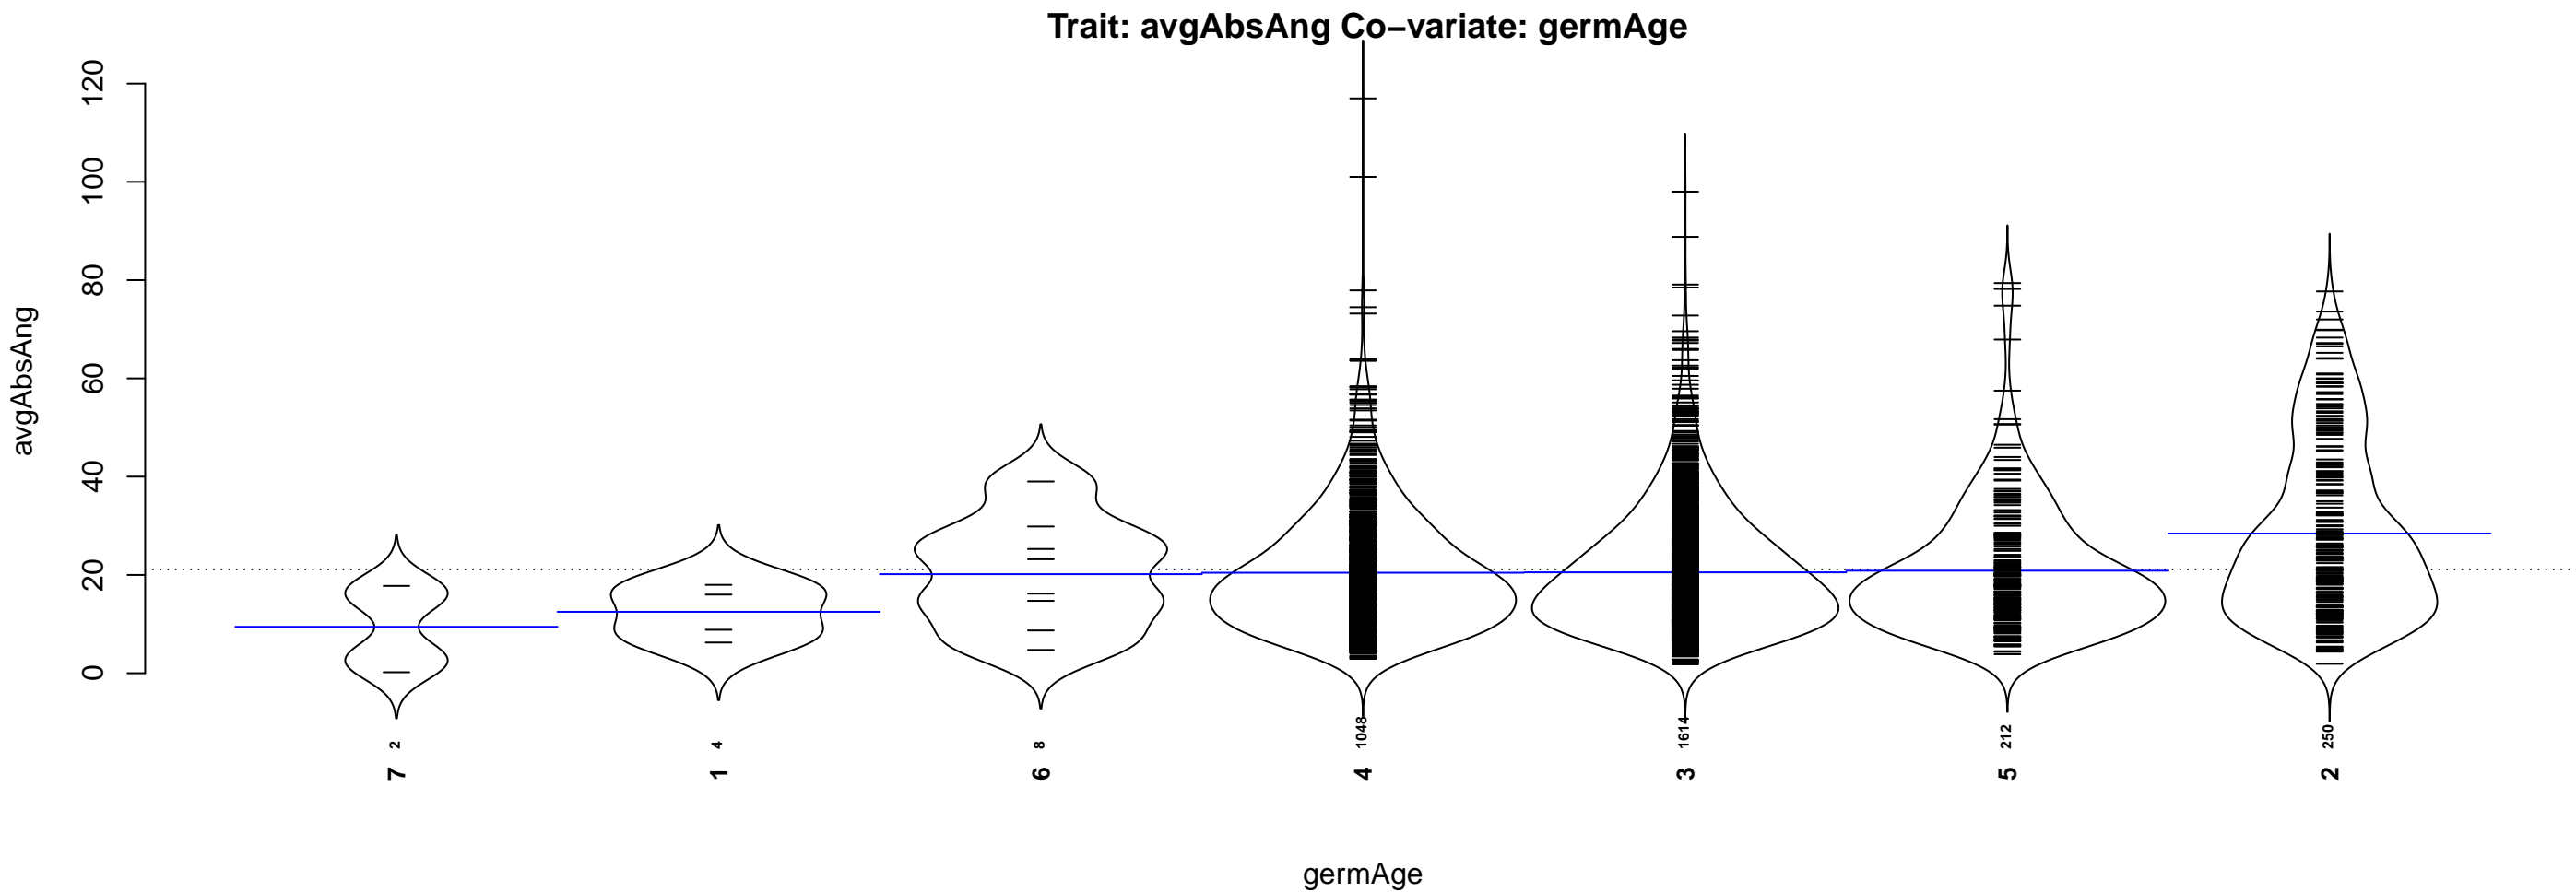

Trait: avgAbsAng Co-variate: rootAge

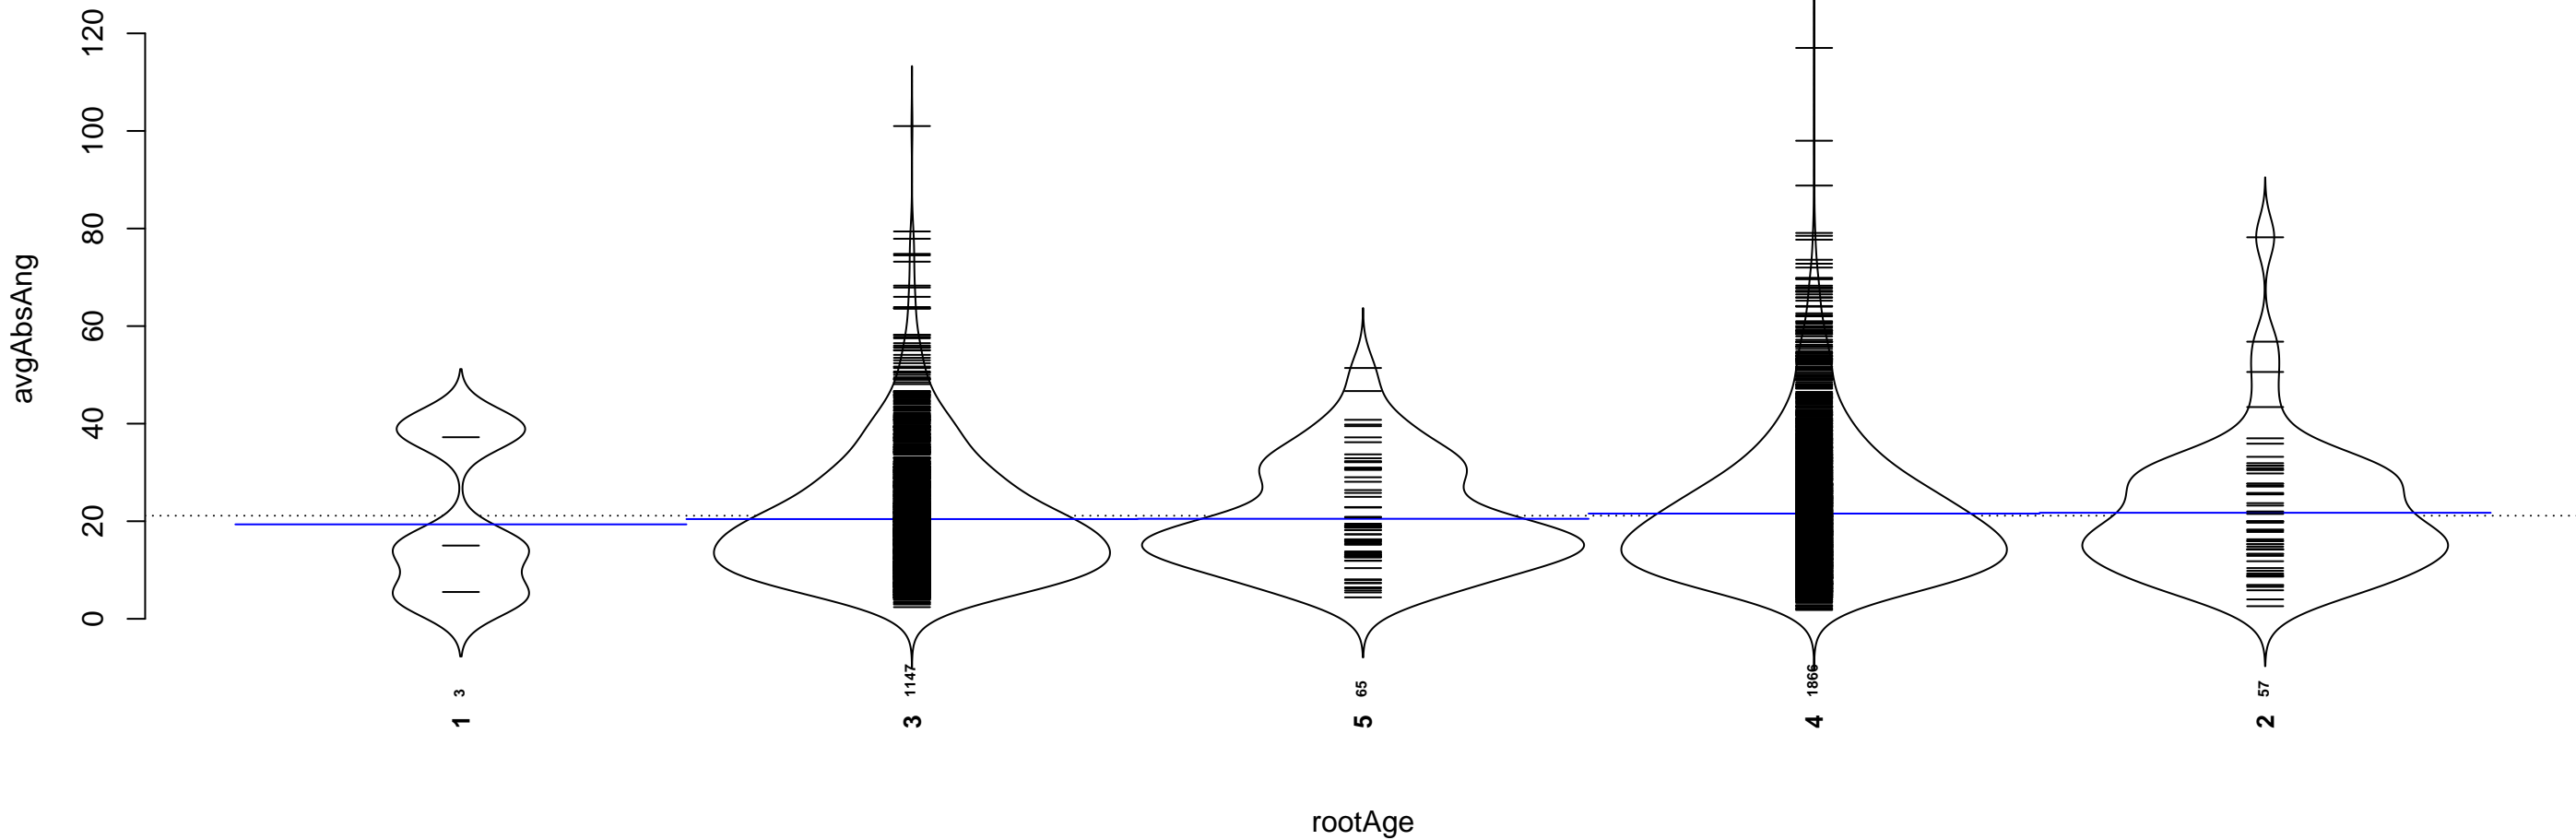

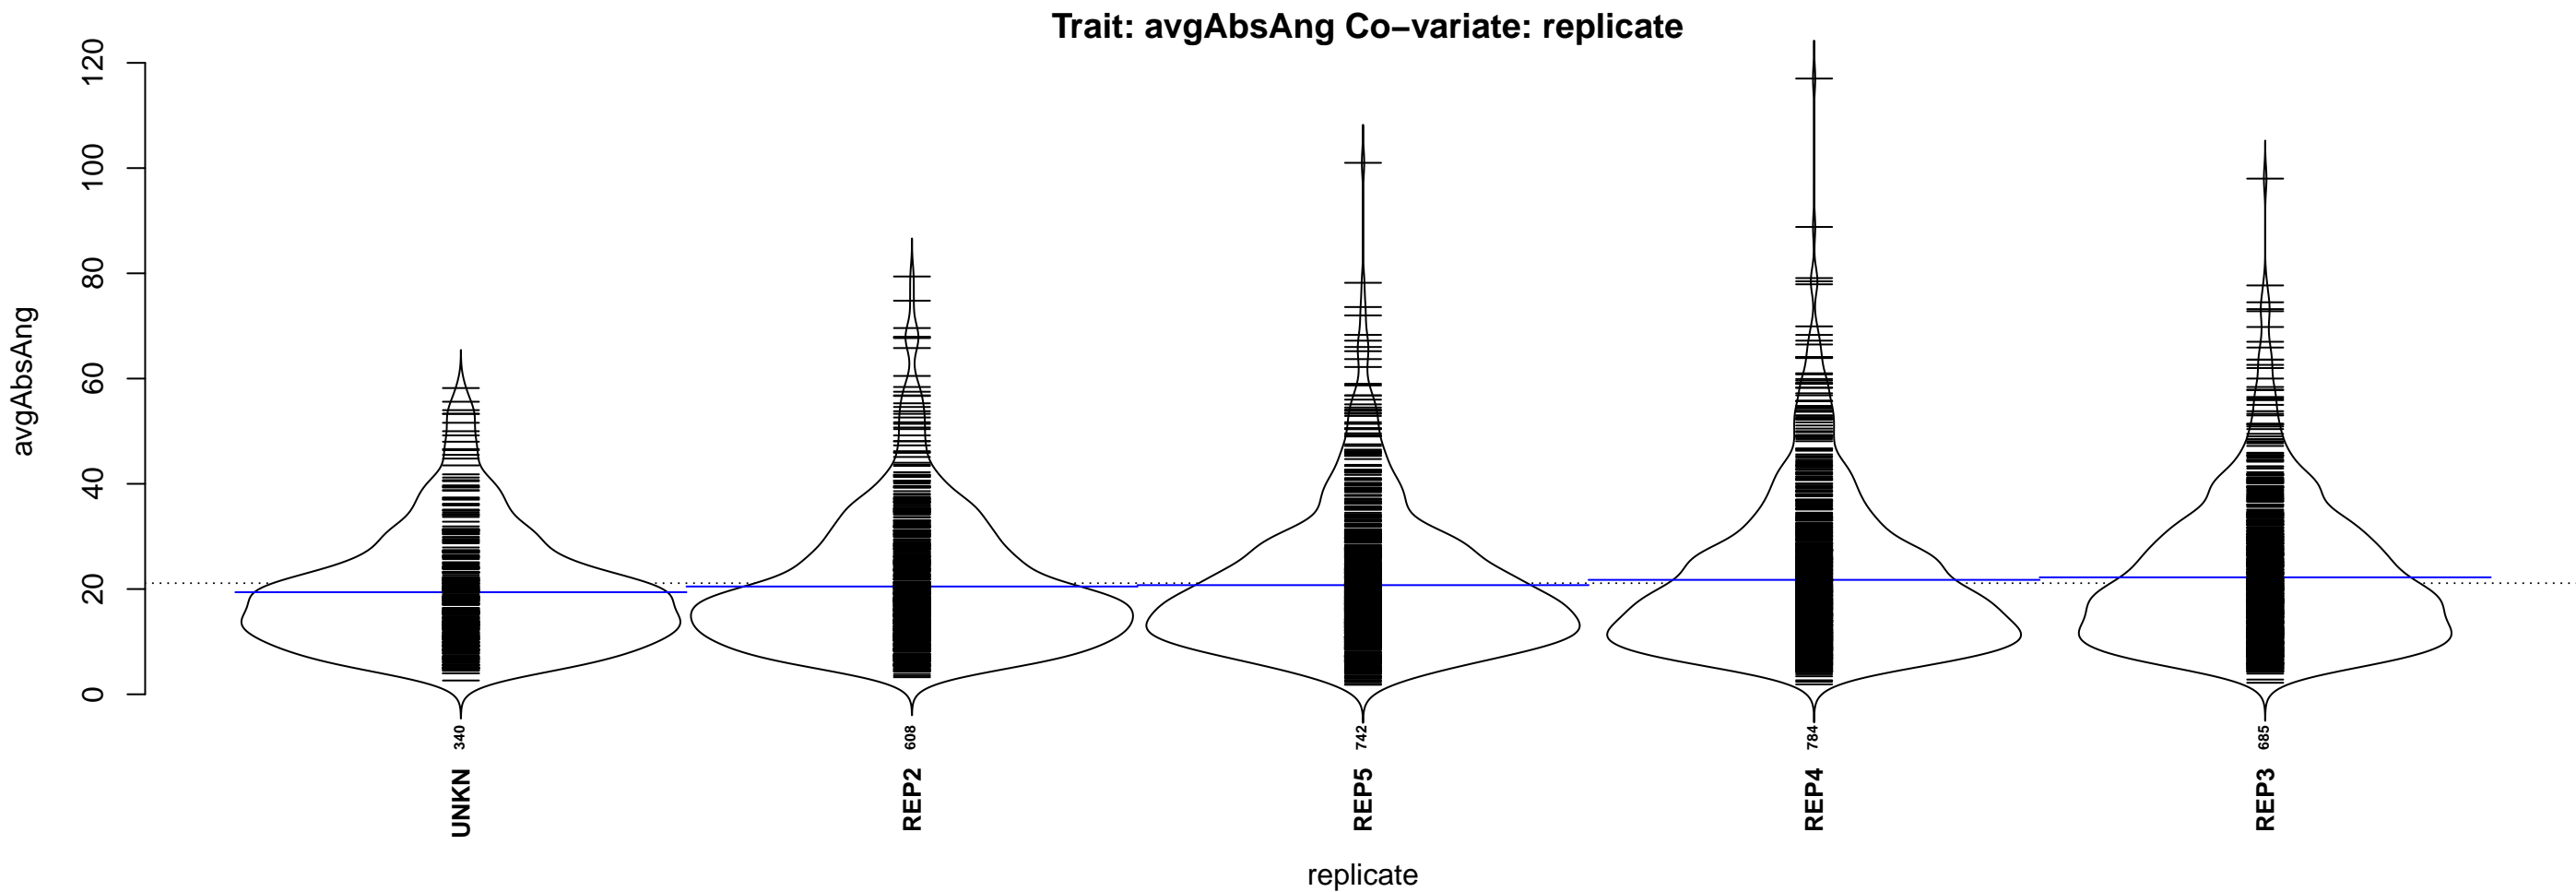

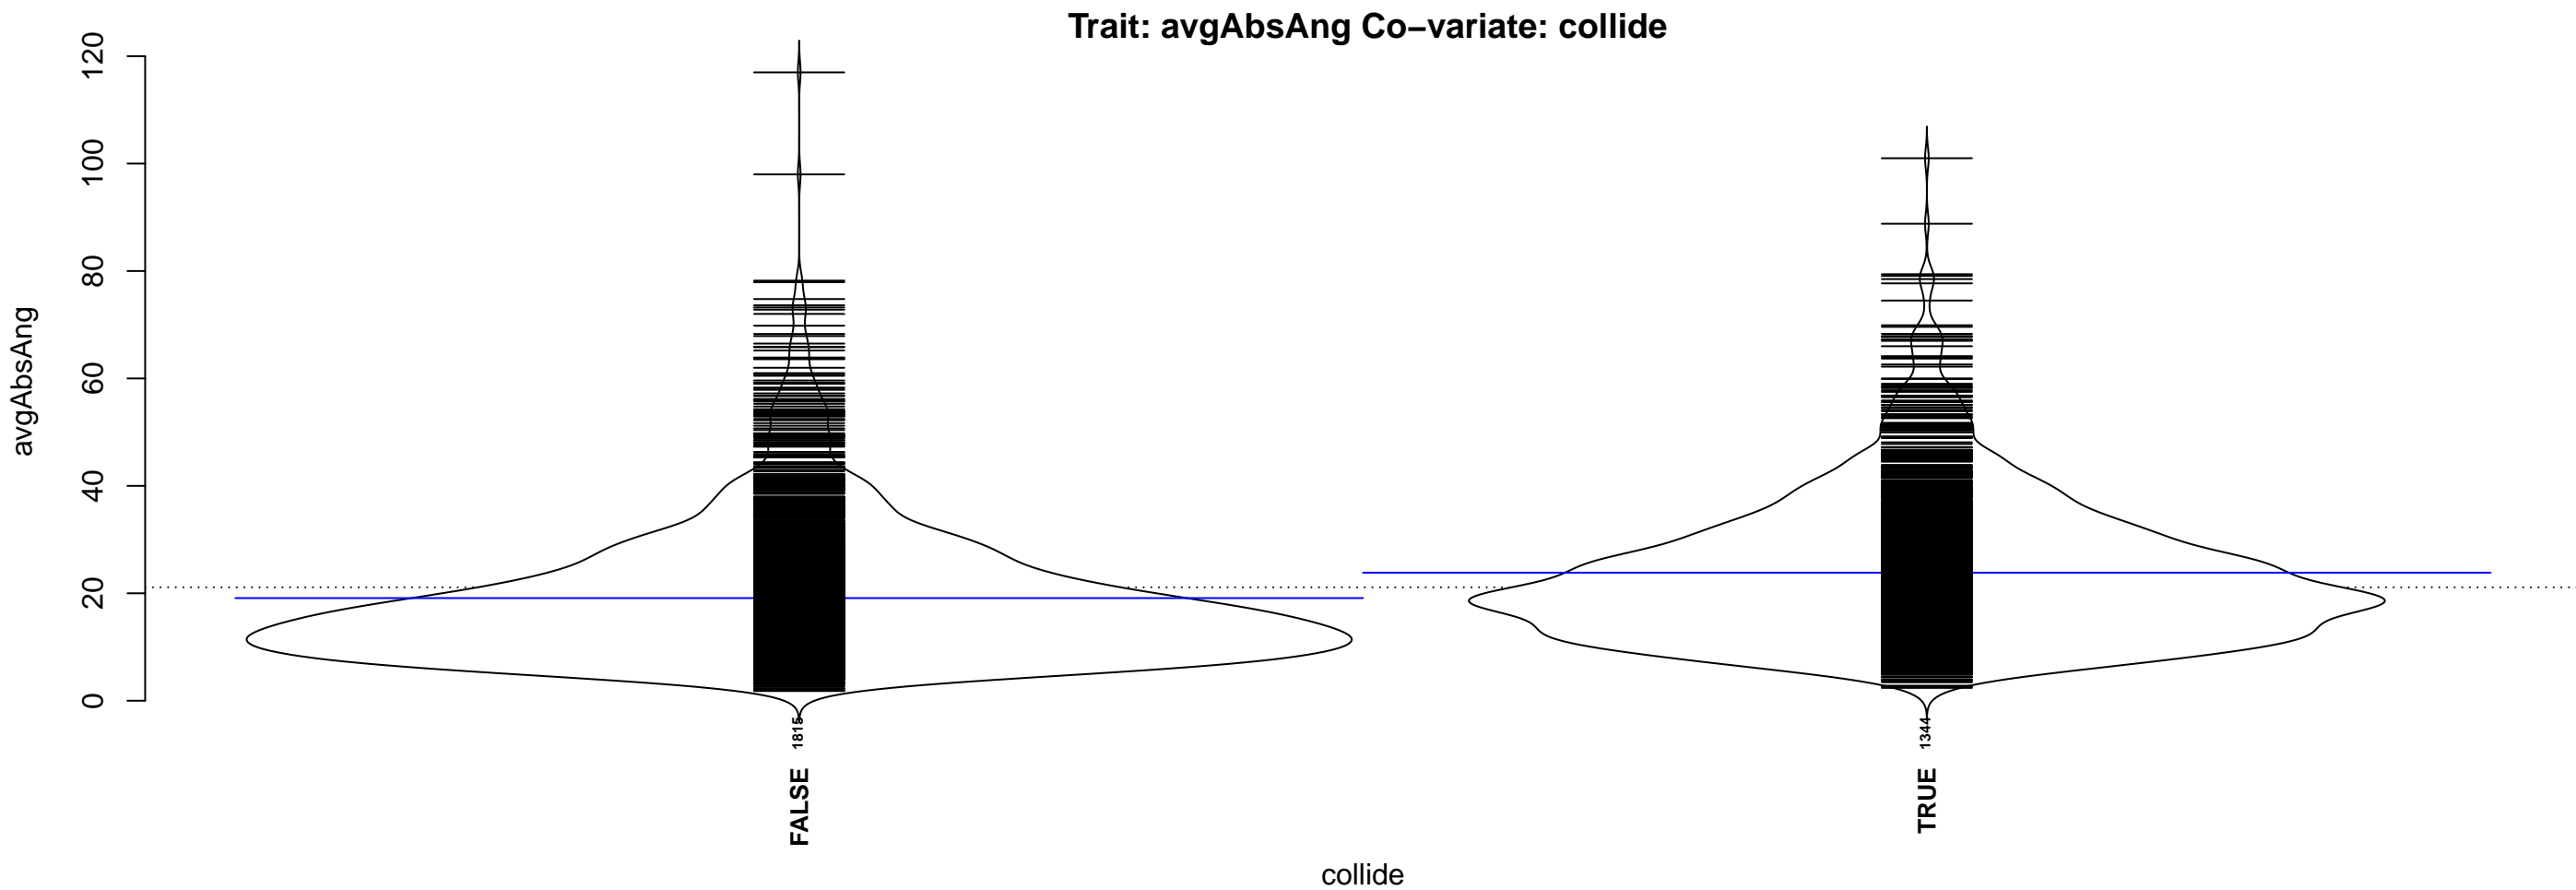

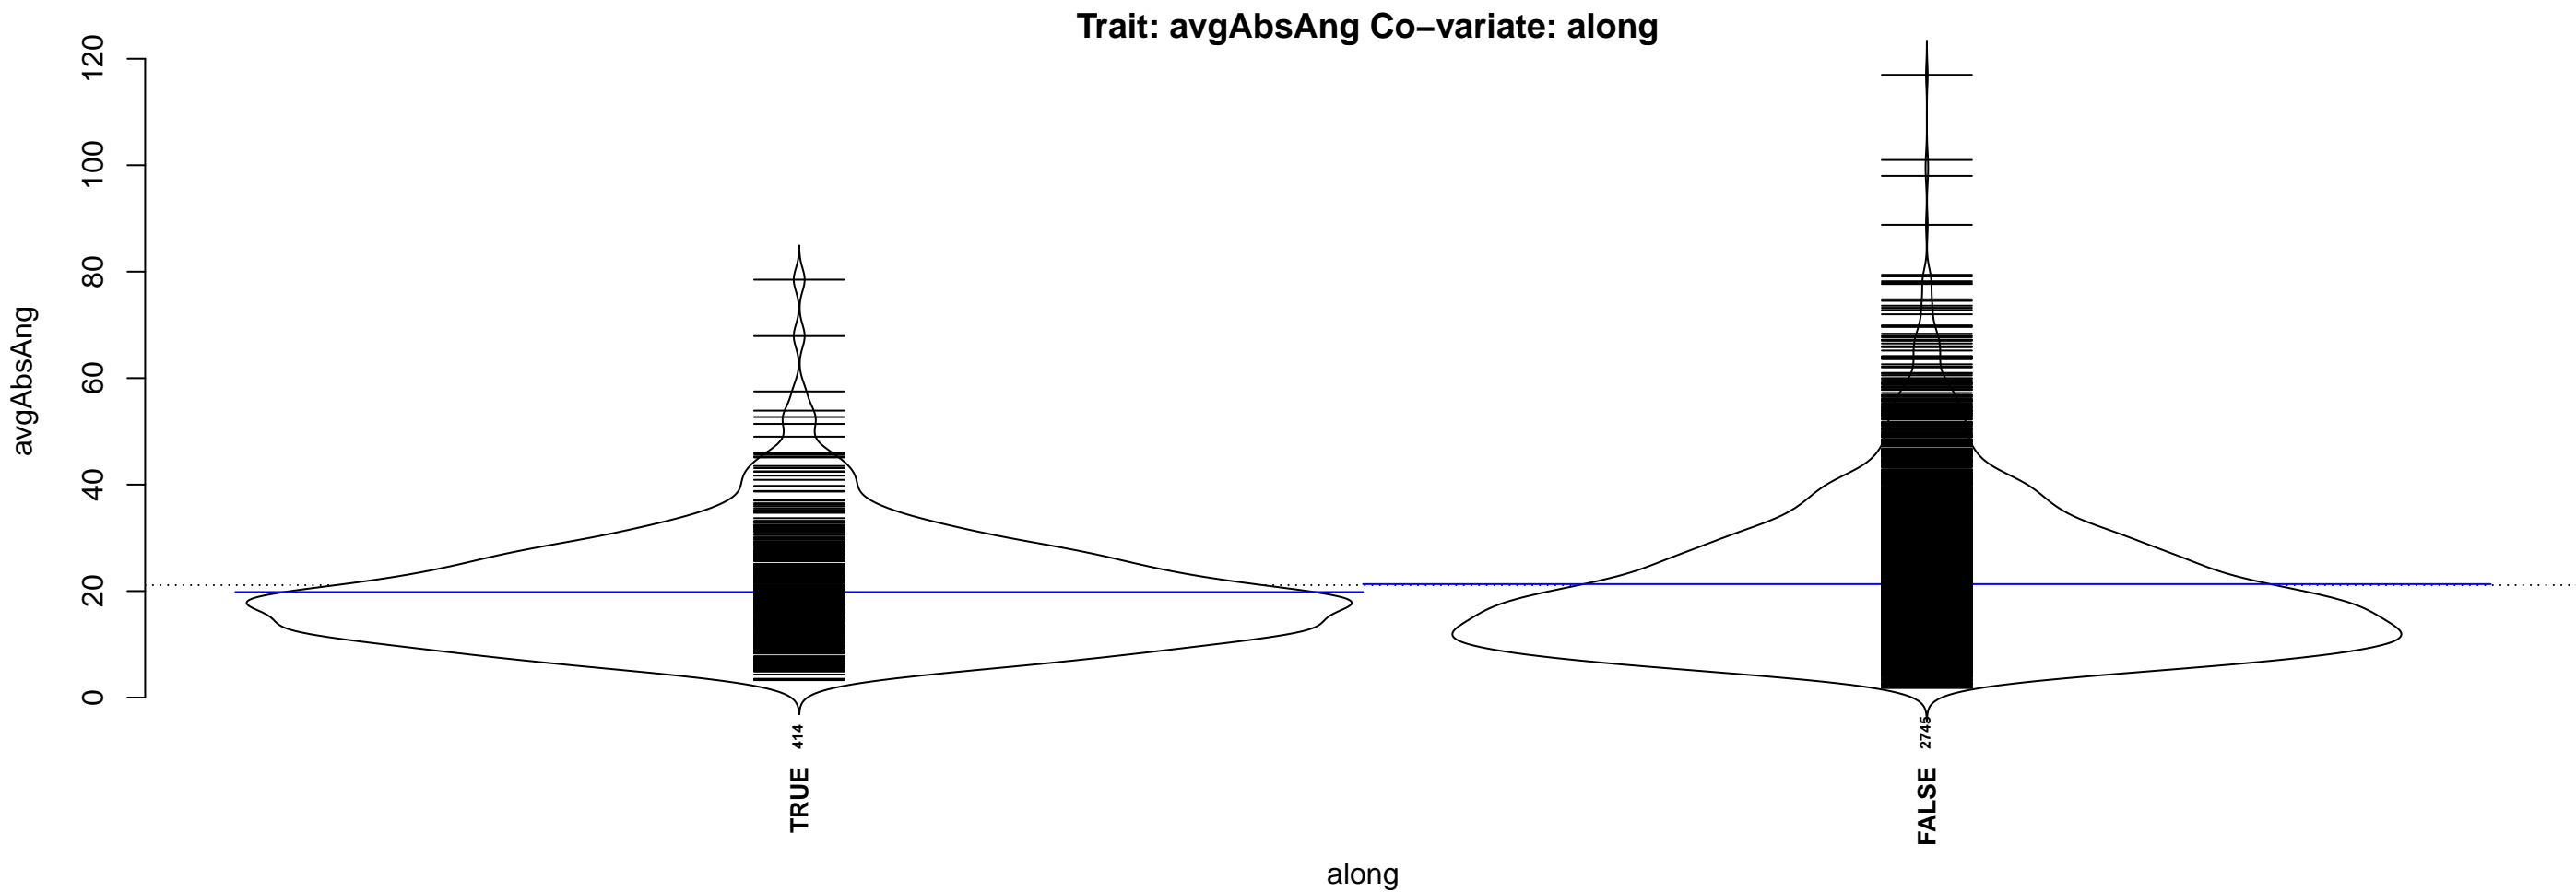

first3rdAng

200

150

100

50

0

Trait: first3rdAng Co-variate: genotype

genotype

IL3-3 2  
IL10-2 52  
IL3-5 32  
IL12-2 24  
IL7-2 31  
IL7-5-P5 27  
IL12-3 27  
IL11-4-1 12  
IL9-1-2 20  
IL6-2 64  
IL9-1 27  
IL9-3-1 63  
IL1-1-3 45  
IL2-5 55  
IL7-5-1 64  
IL12-3-1 37  
IL4-3 71  
IL2-6 33  
IL9-2-6 33  
IL1-3 40  
IL4-3-2 67  
IL10-1 41  
IL6-3 48  
IL4-4 71  
IL2-1-1 77  
IL7-3 36  
IL7-5 29  
IL1-4 38  
IL2-4 32  
IL5-4 39  
IL11-2 73  
IL9-3-2 94  
IL8-3 33  
M82 68  
IL5-1 46  
IL4-2 37  
IL10-3 46  
IL10-2-2 44  
IL8-2 30  
IL10-1-1 57  
IL6-1 28  
IL9-2 38  
IL9-2-5 41  
IL1-1-2 20  
IL2-6-5 44  
IL5-3 36  
IL1-1 12  
IL11-3 33  
IL1-1-4 53  
IL2-1 21  
IL8-1-1 25  
IL9-1-3 45  
IL2-3 32  
IL3-1 35  
IL8-2-1 41  
IL3-4 30  
IL12-4-1 28  
IL6-4 28  
IL2-2 25  
IL12-1 40  
IL7-4 44  
IL8-1-5 59  
IL11-1 40  
IL4-1 46  
IL9-3 40  
IL5-5 30  
IL7-5-5 39  
IL7-1 40  
IL5-2 25  
IL12-4 81  
IL1-4-18 32  
IL8-1 25  
IL11-4 28  
IL7-5-P75 37  
IL7-4-1 41  
IL3-2 24  
IL8-3-1 20  
PENN 78  
IL12-1-1 10

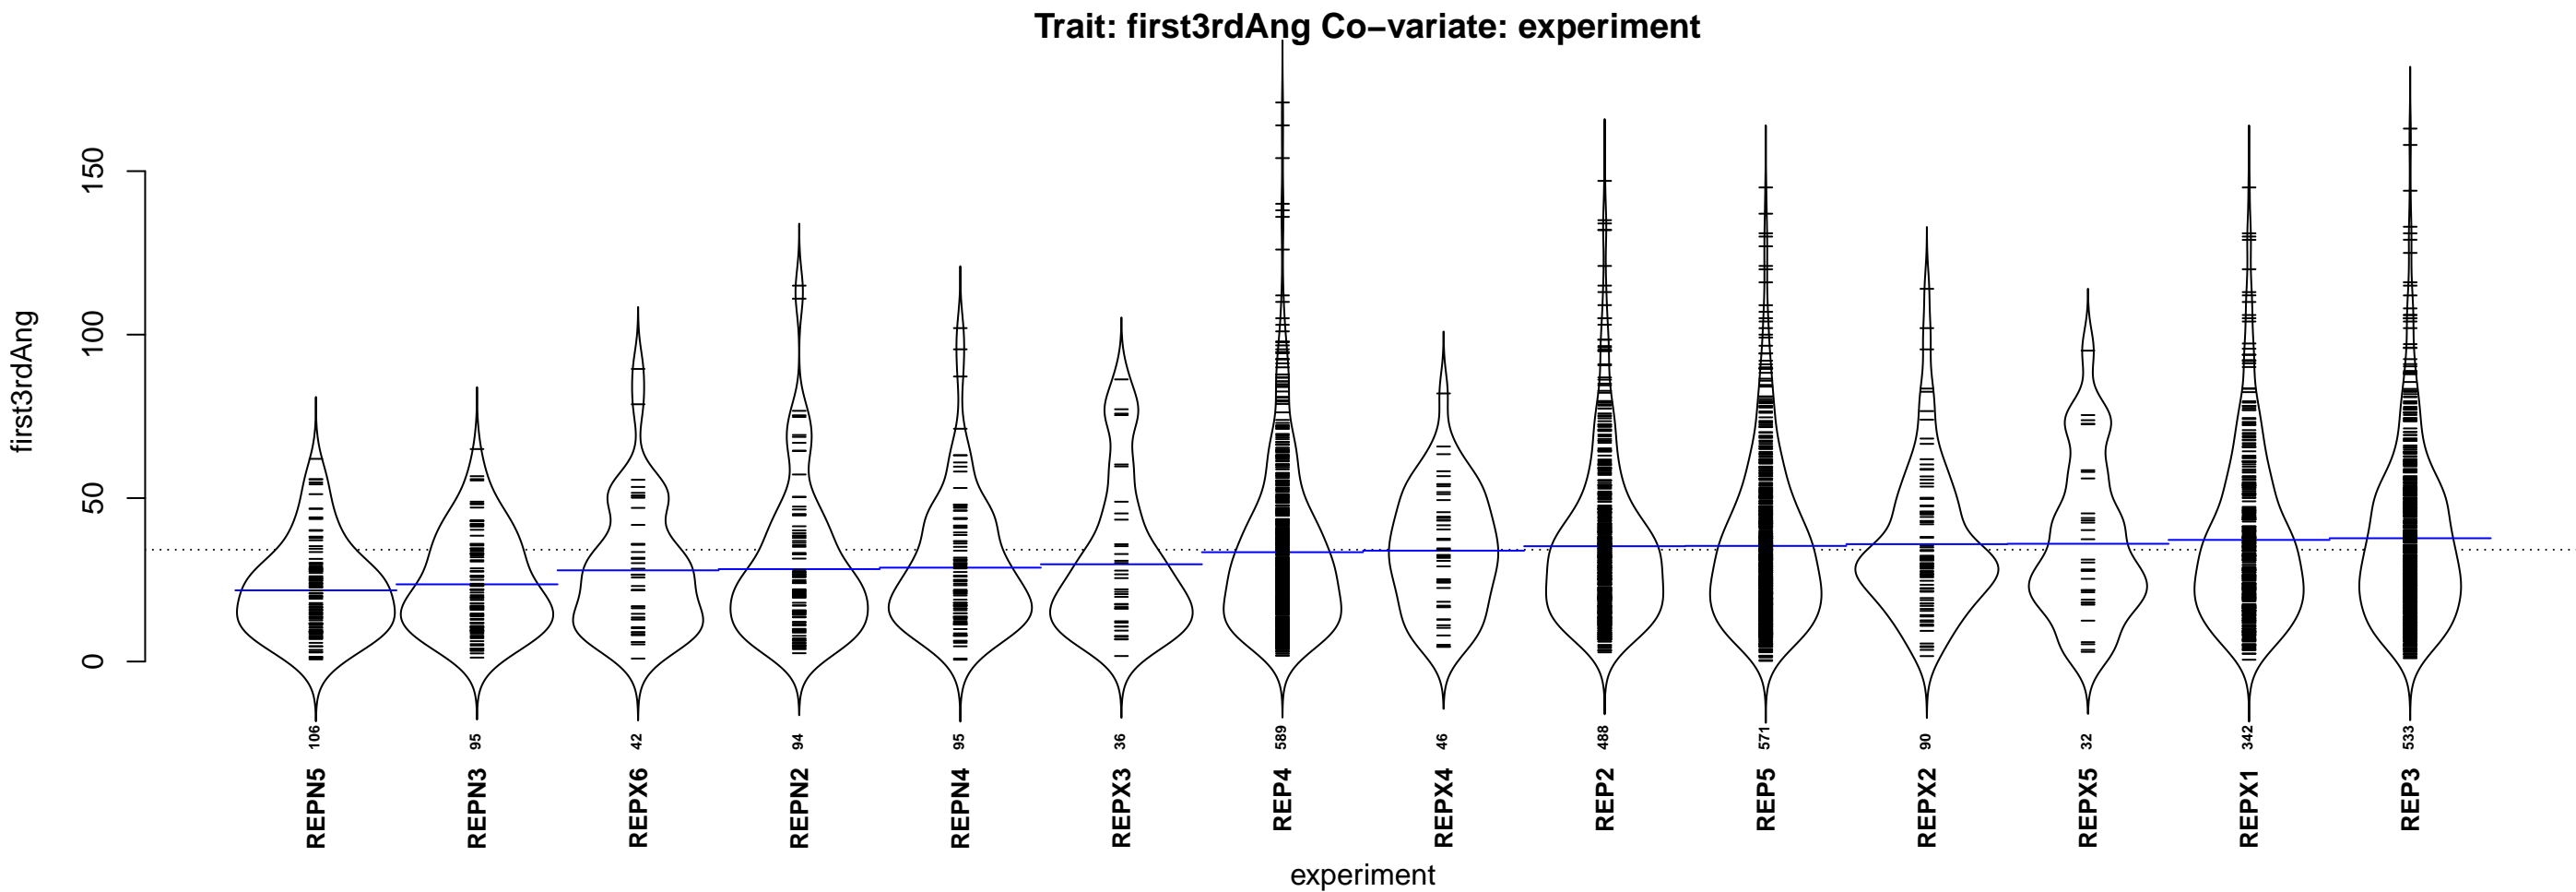

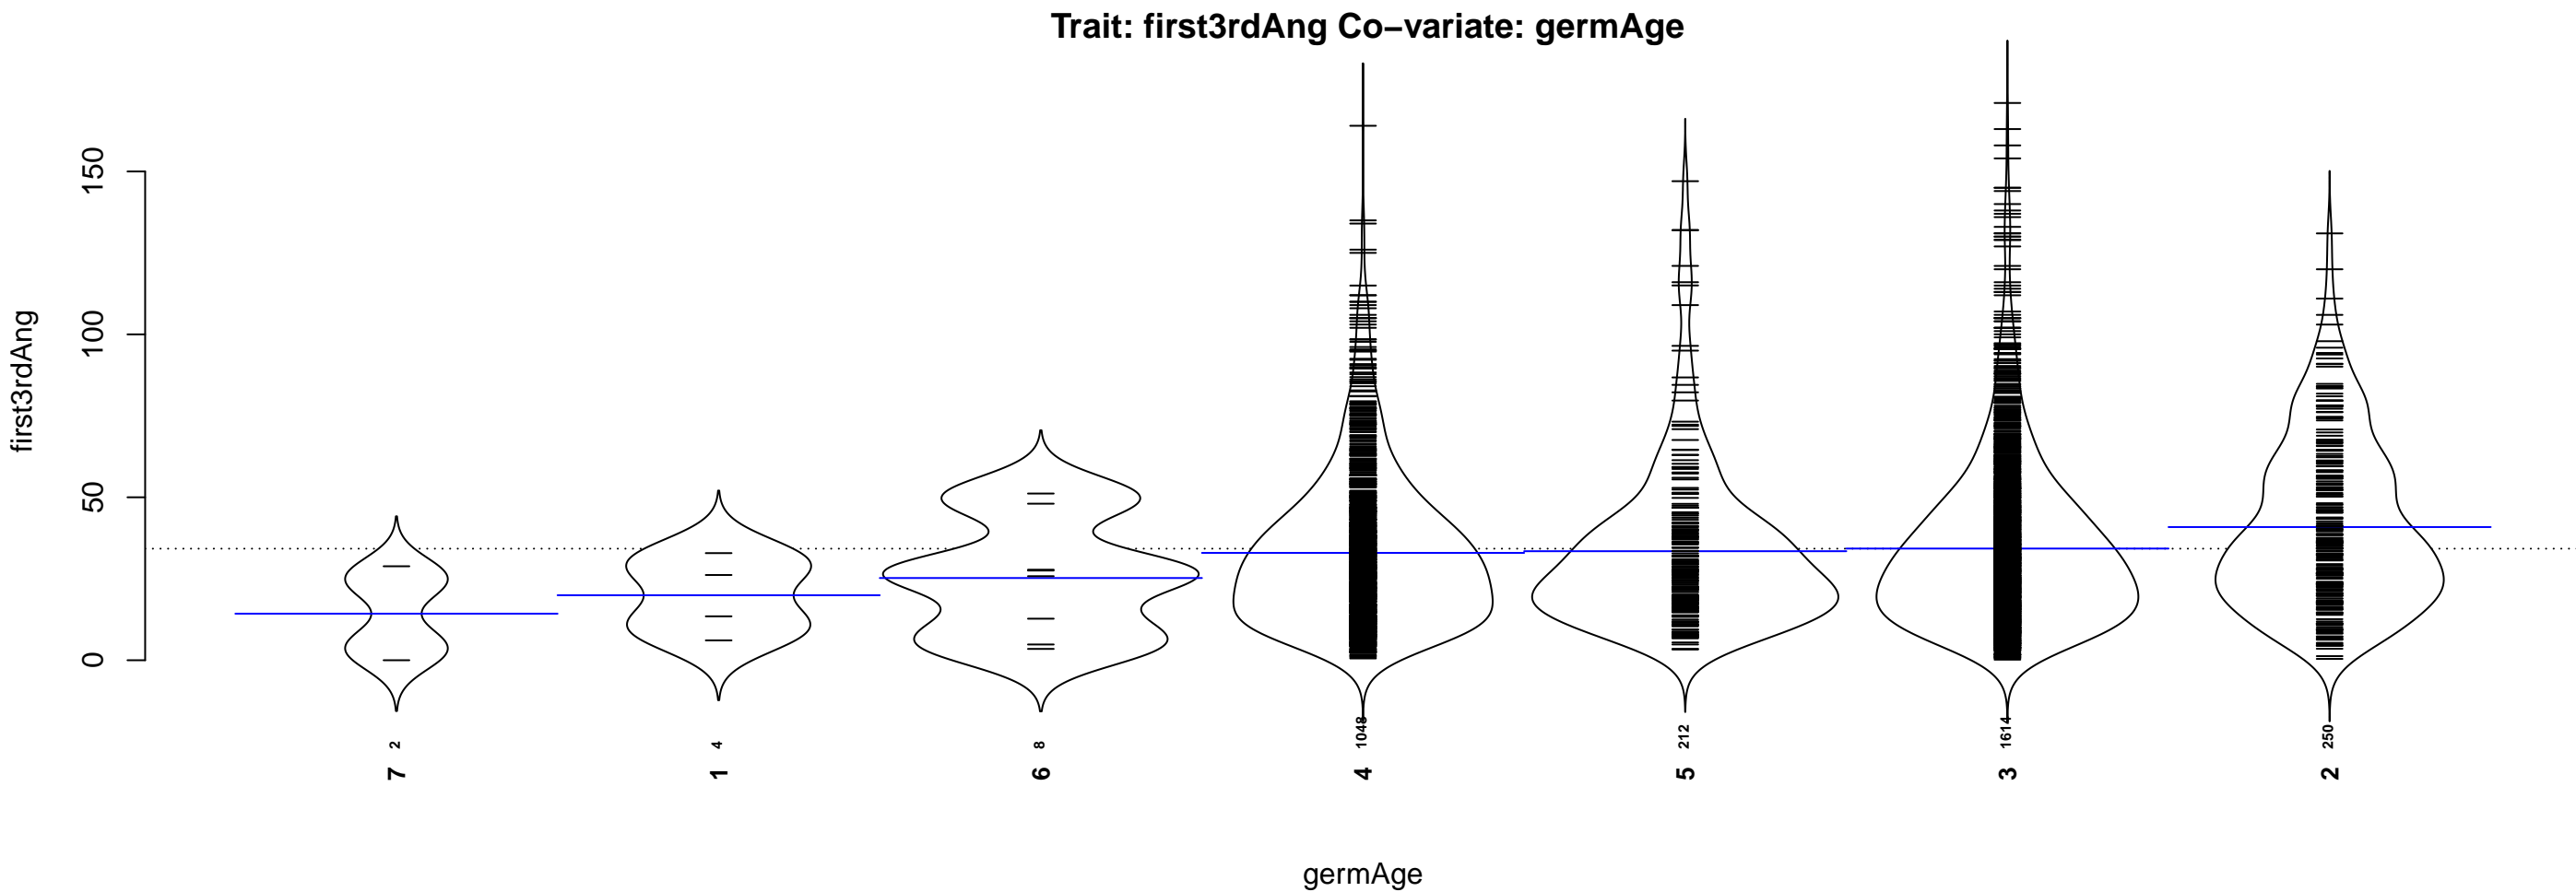

Trait: first3rdAng Co-variate: rootAge

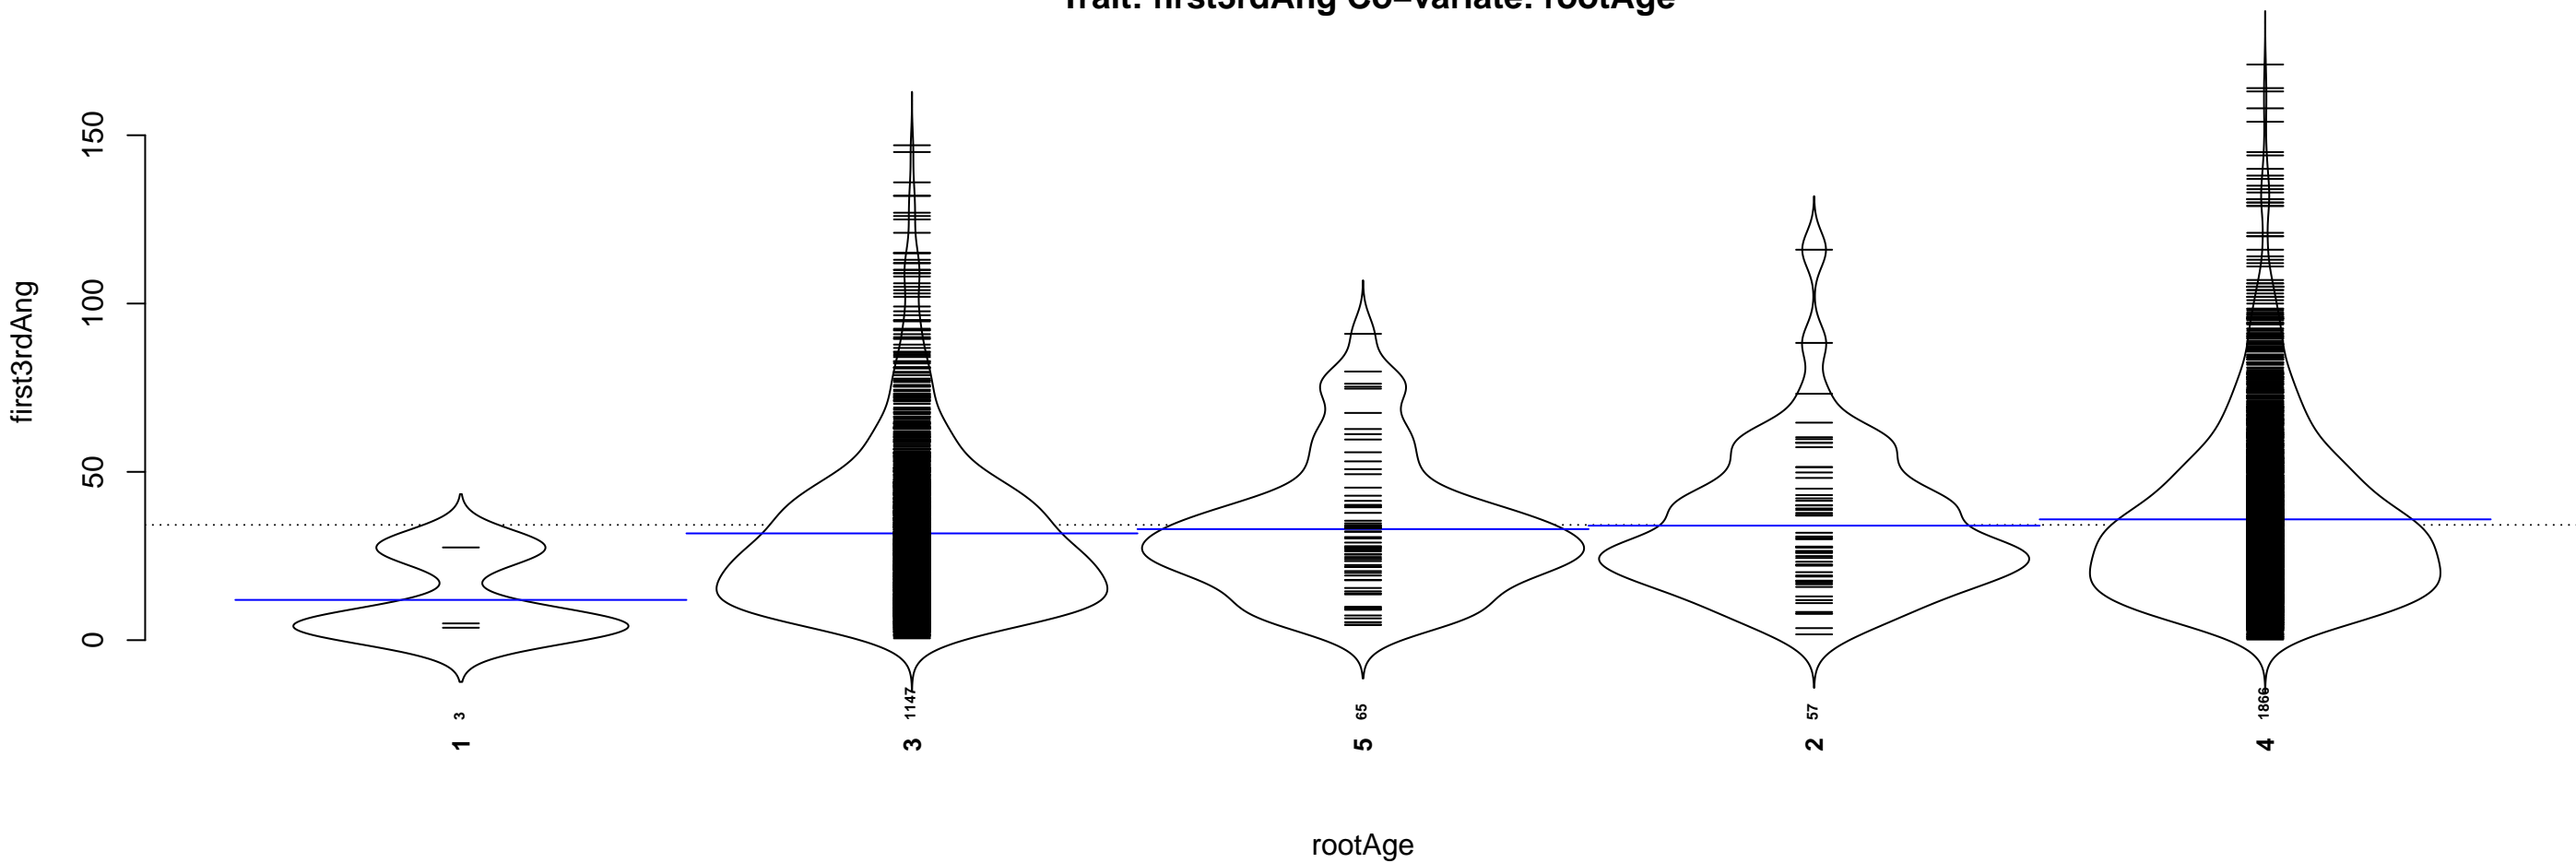

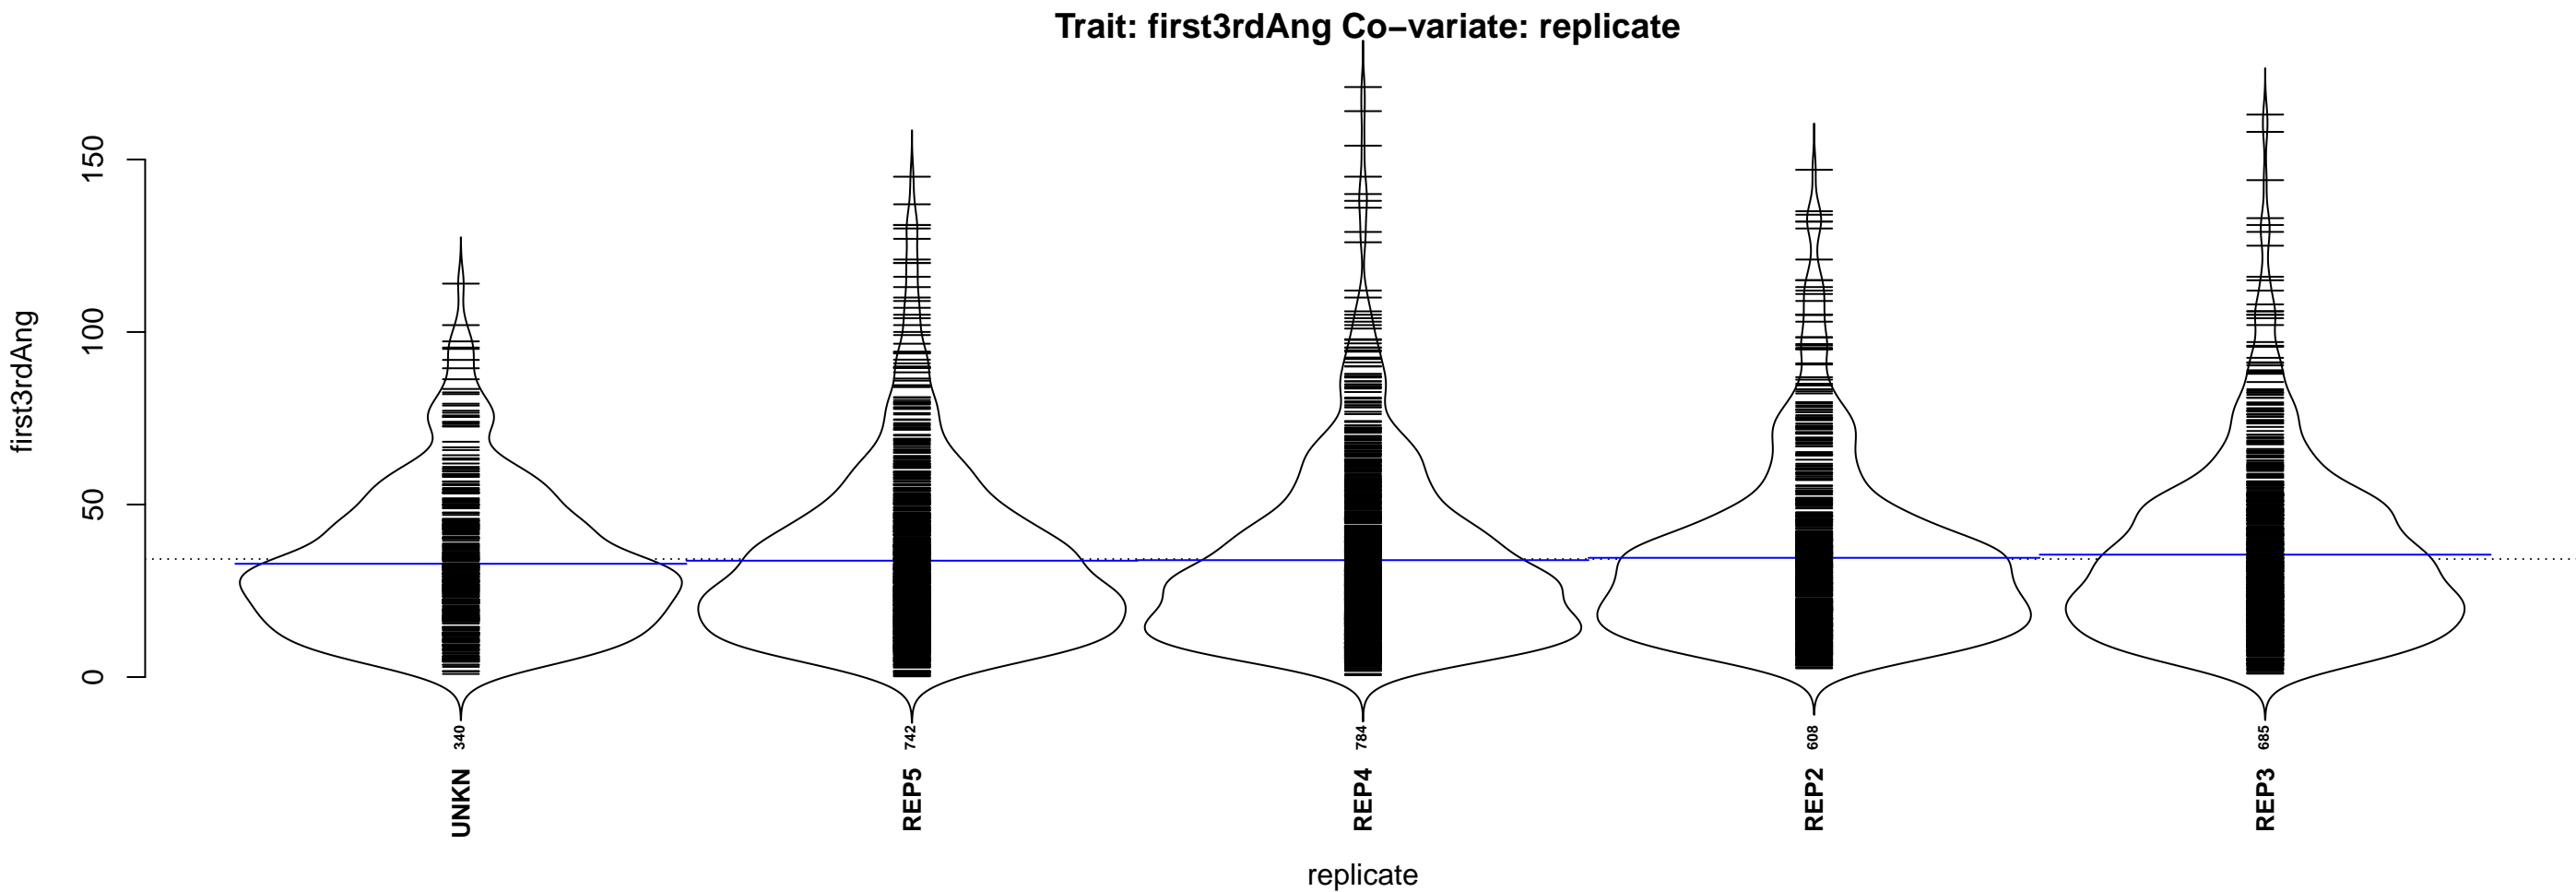

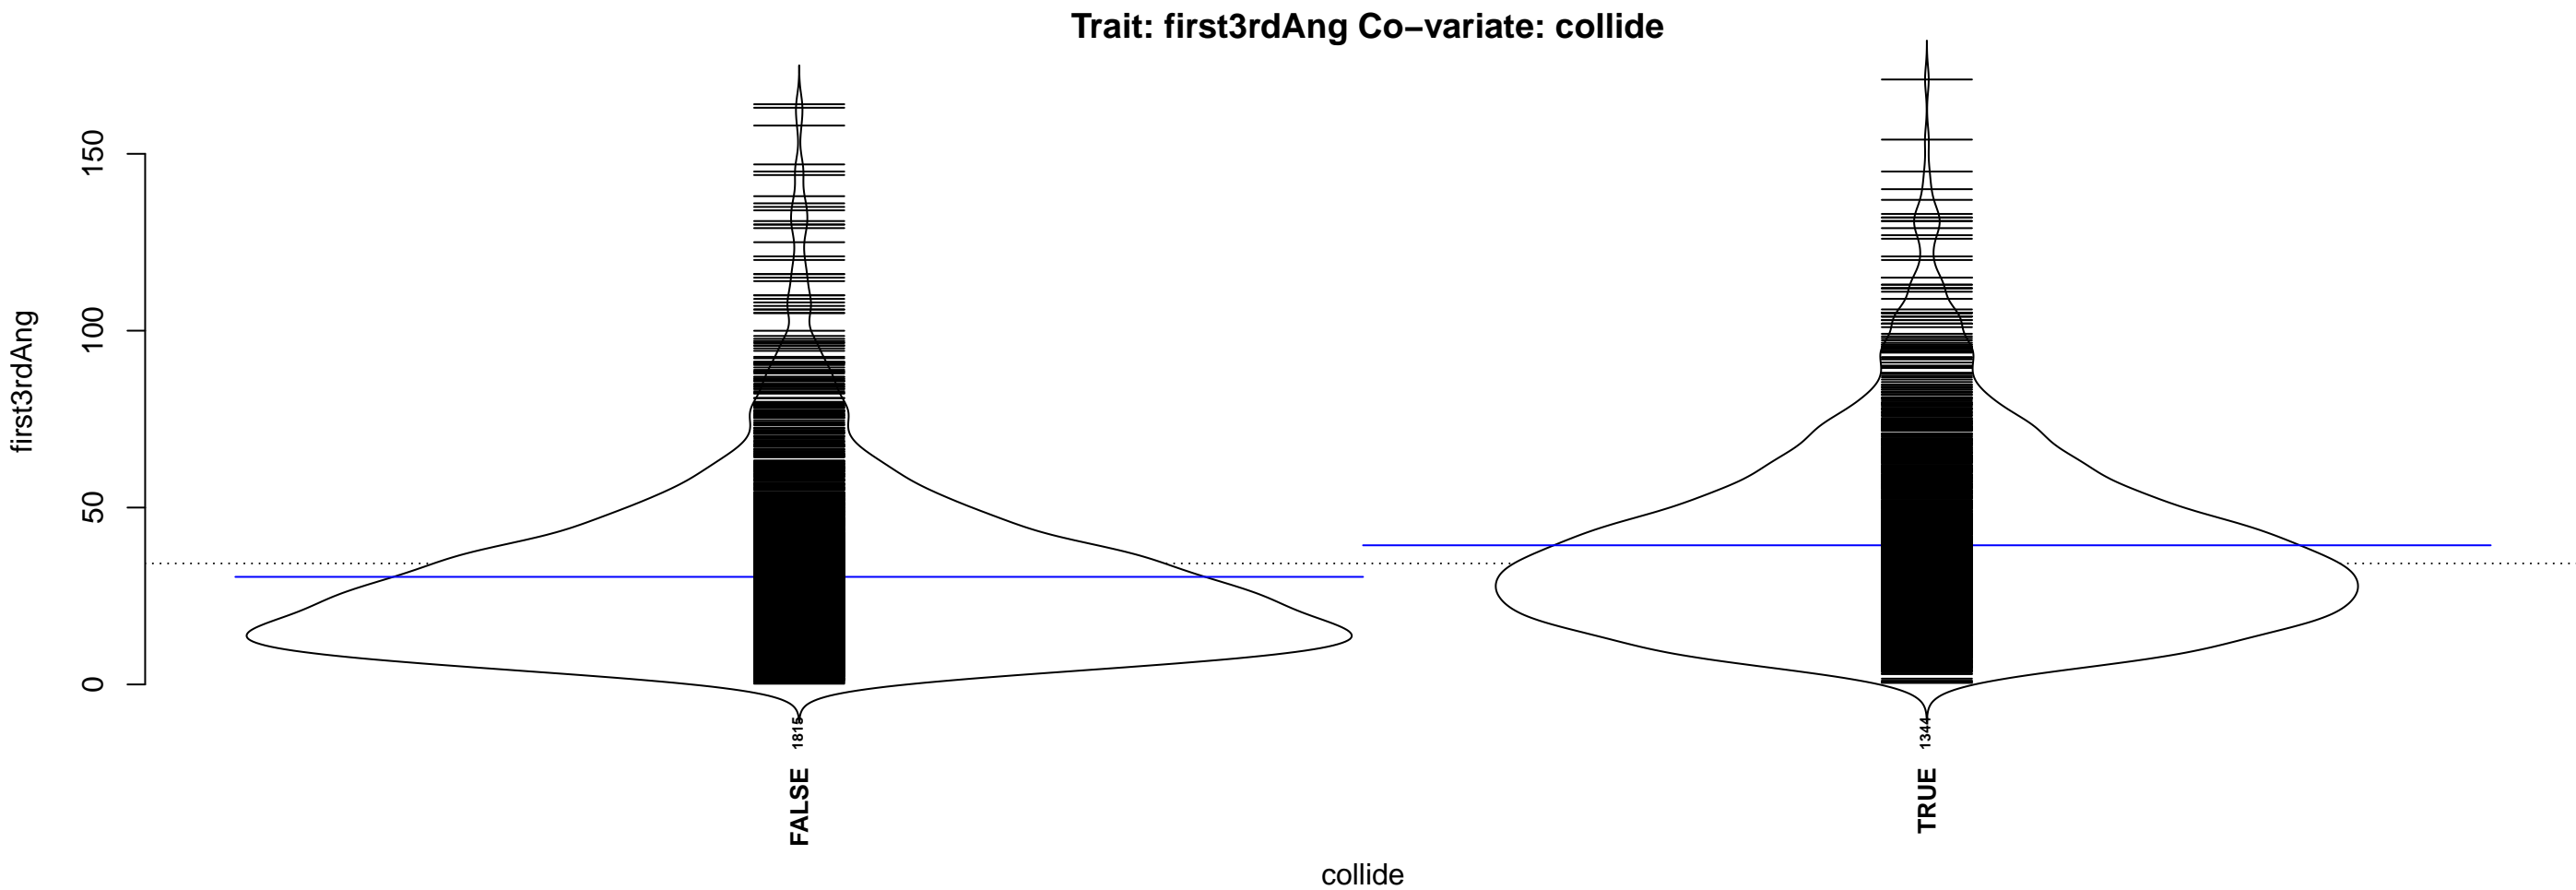

Trait: first3rdAng Co-variate: along

first3rdAng

150  
100  
50  
0

TRUE

414

FALSE

2745

along

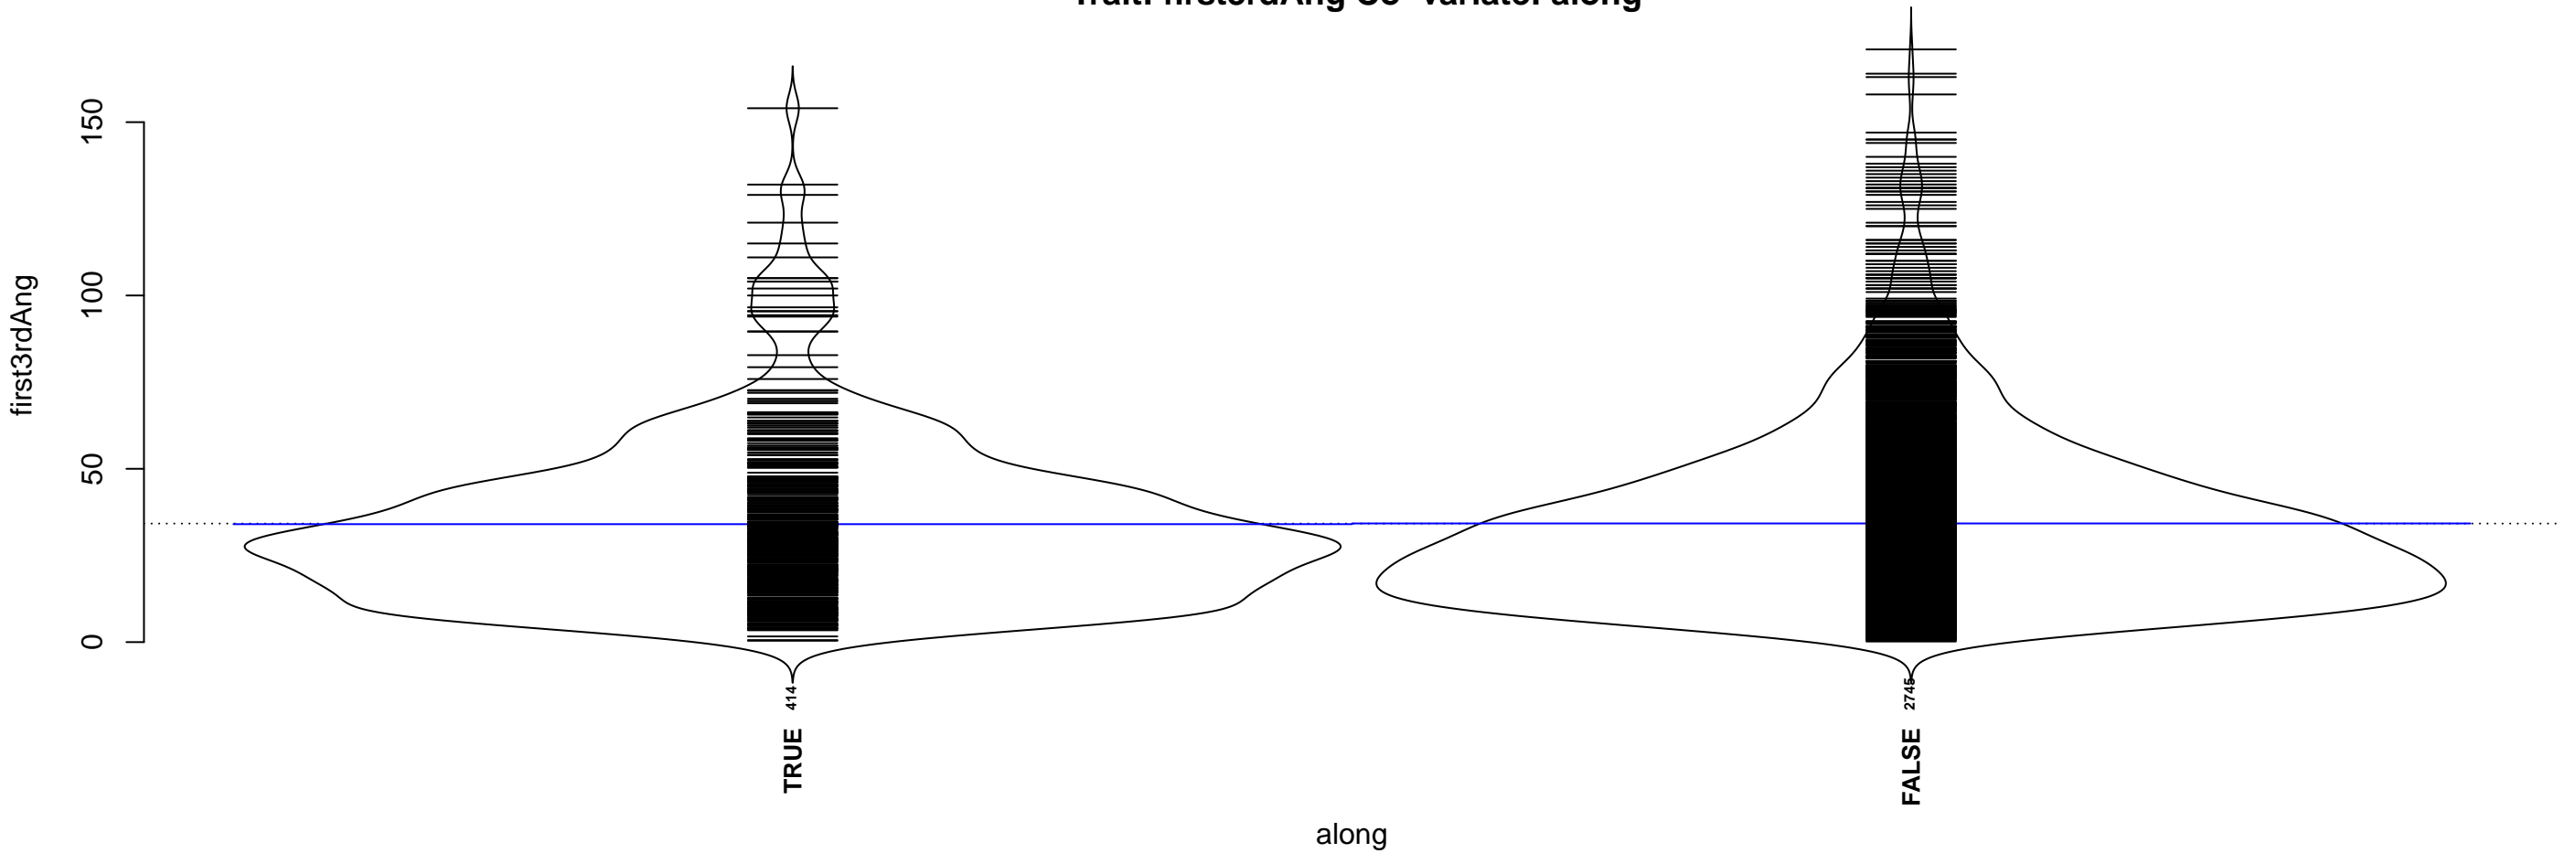

mid3rdAng

150

100

50

0

Trait: mid3rdAng Co-variate: genotype

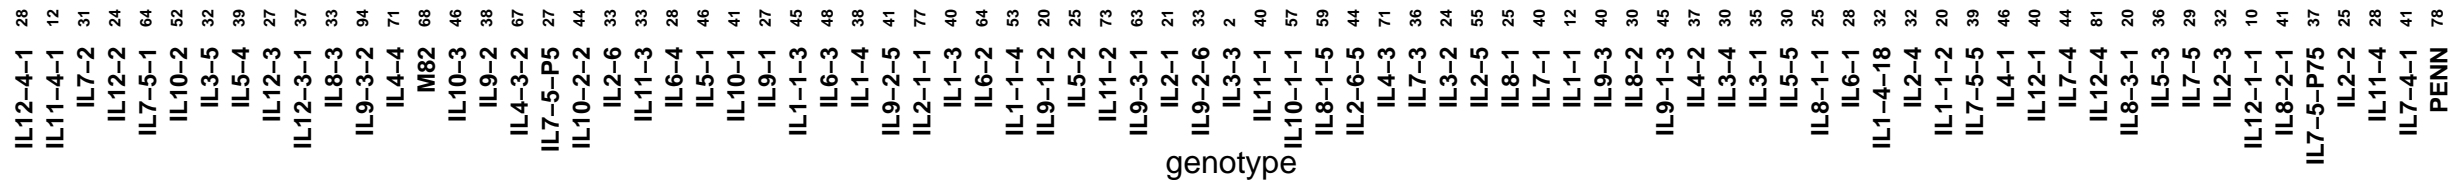

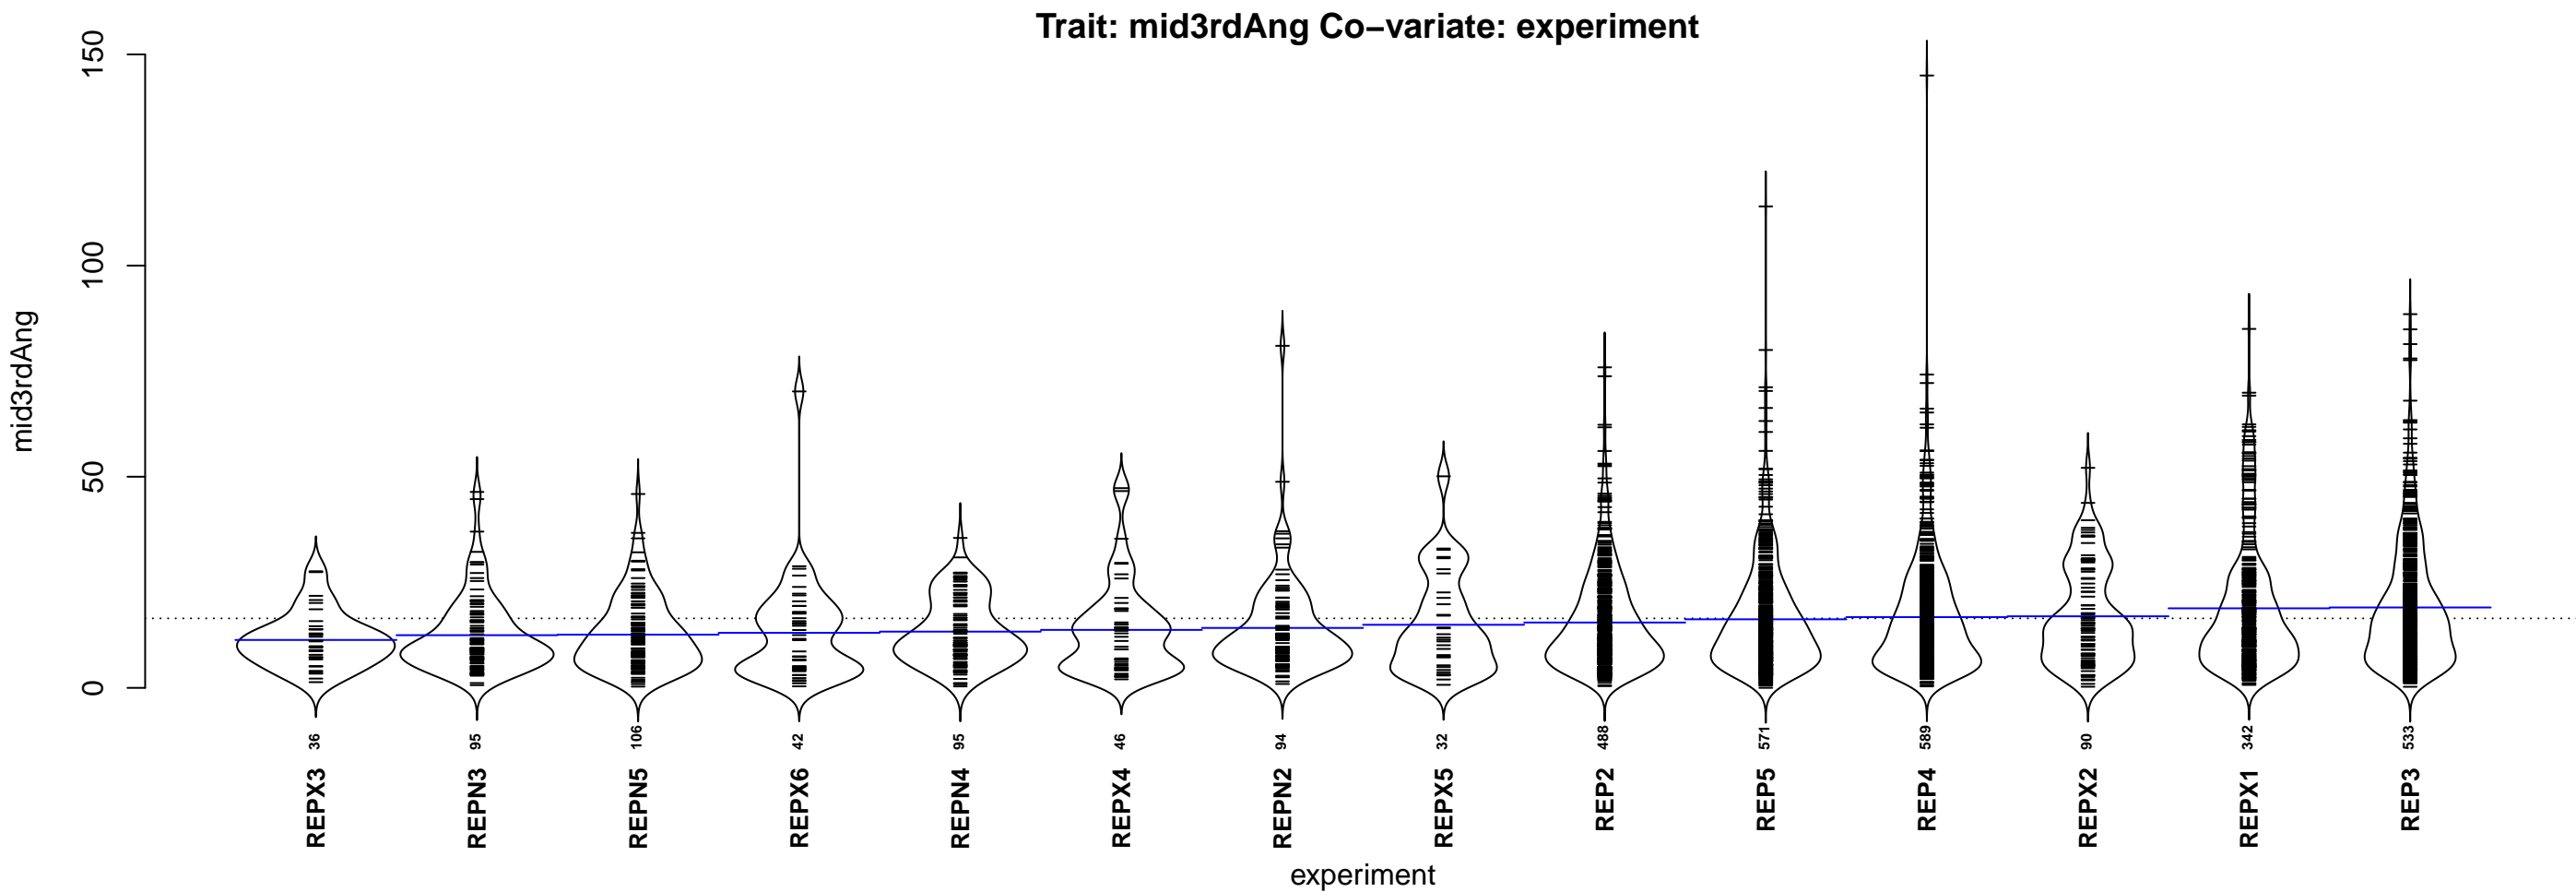

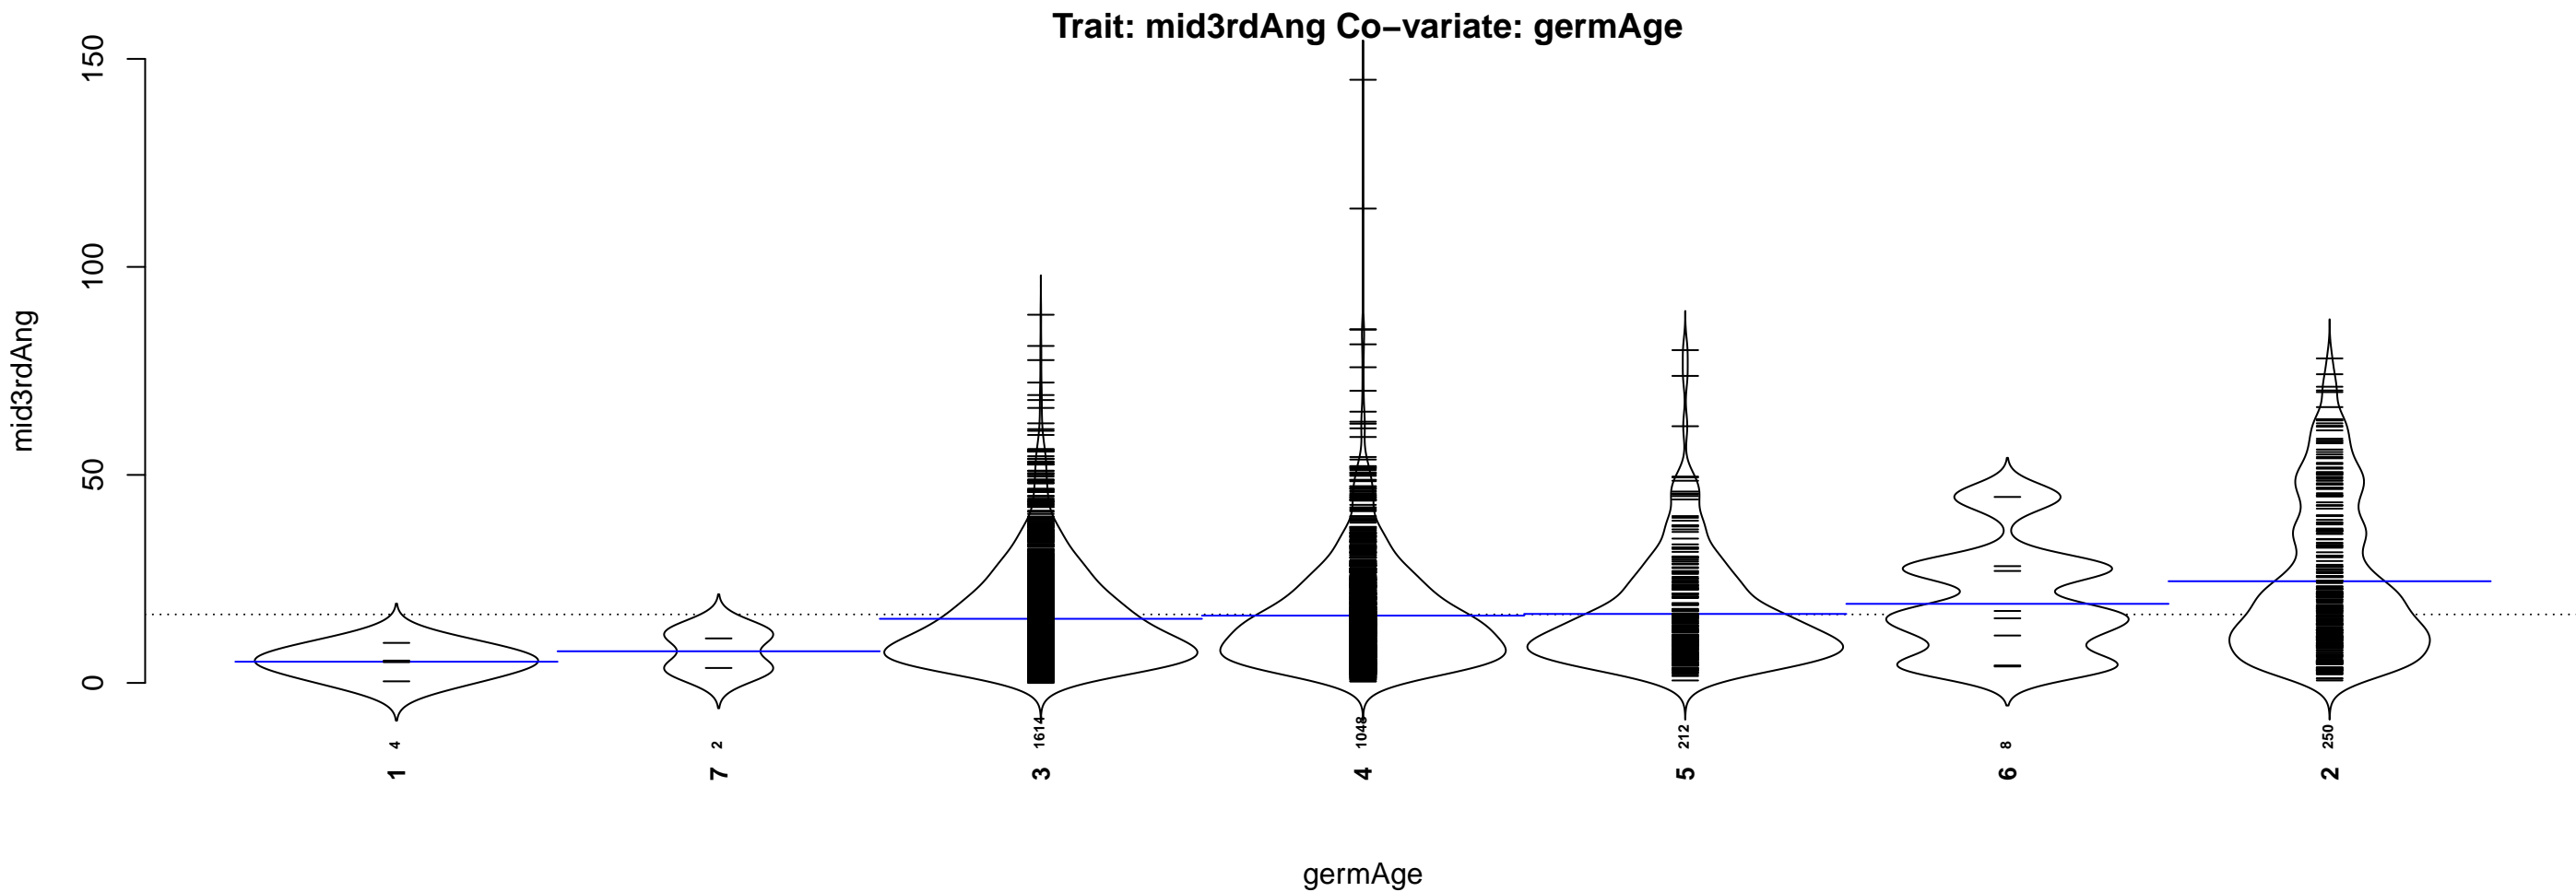

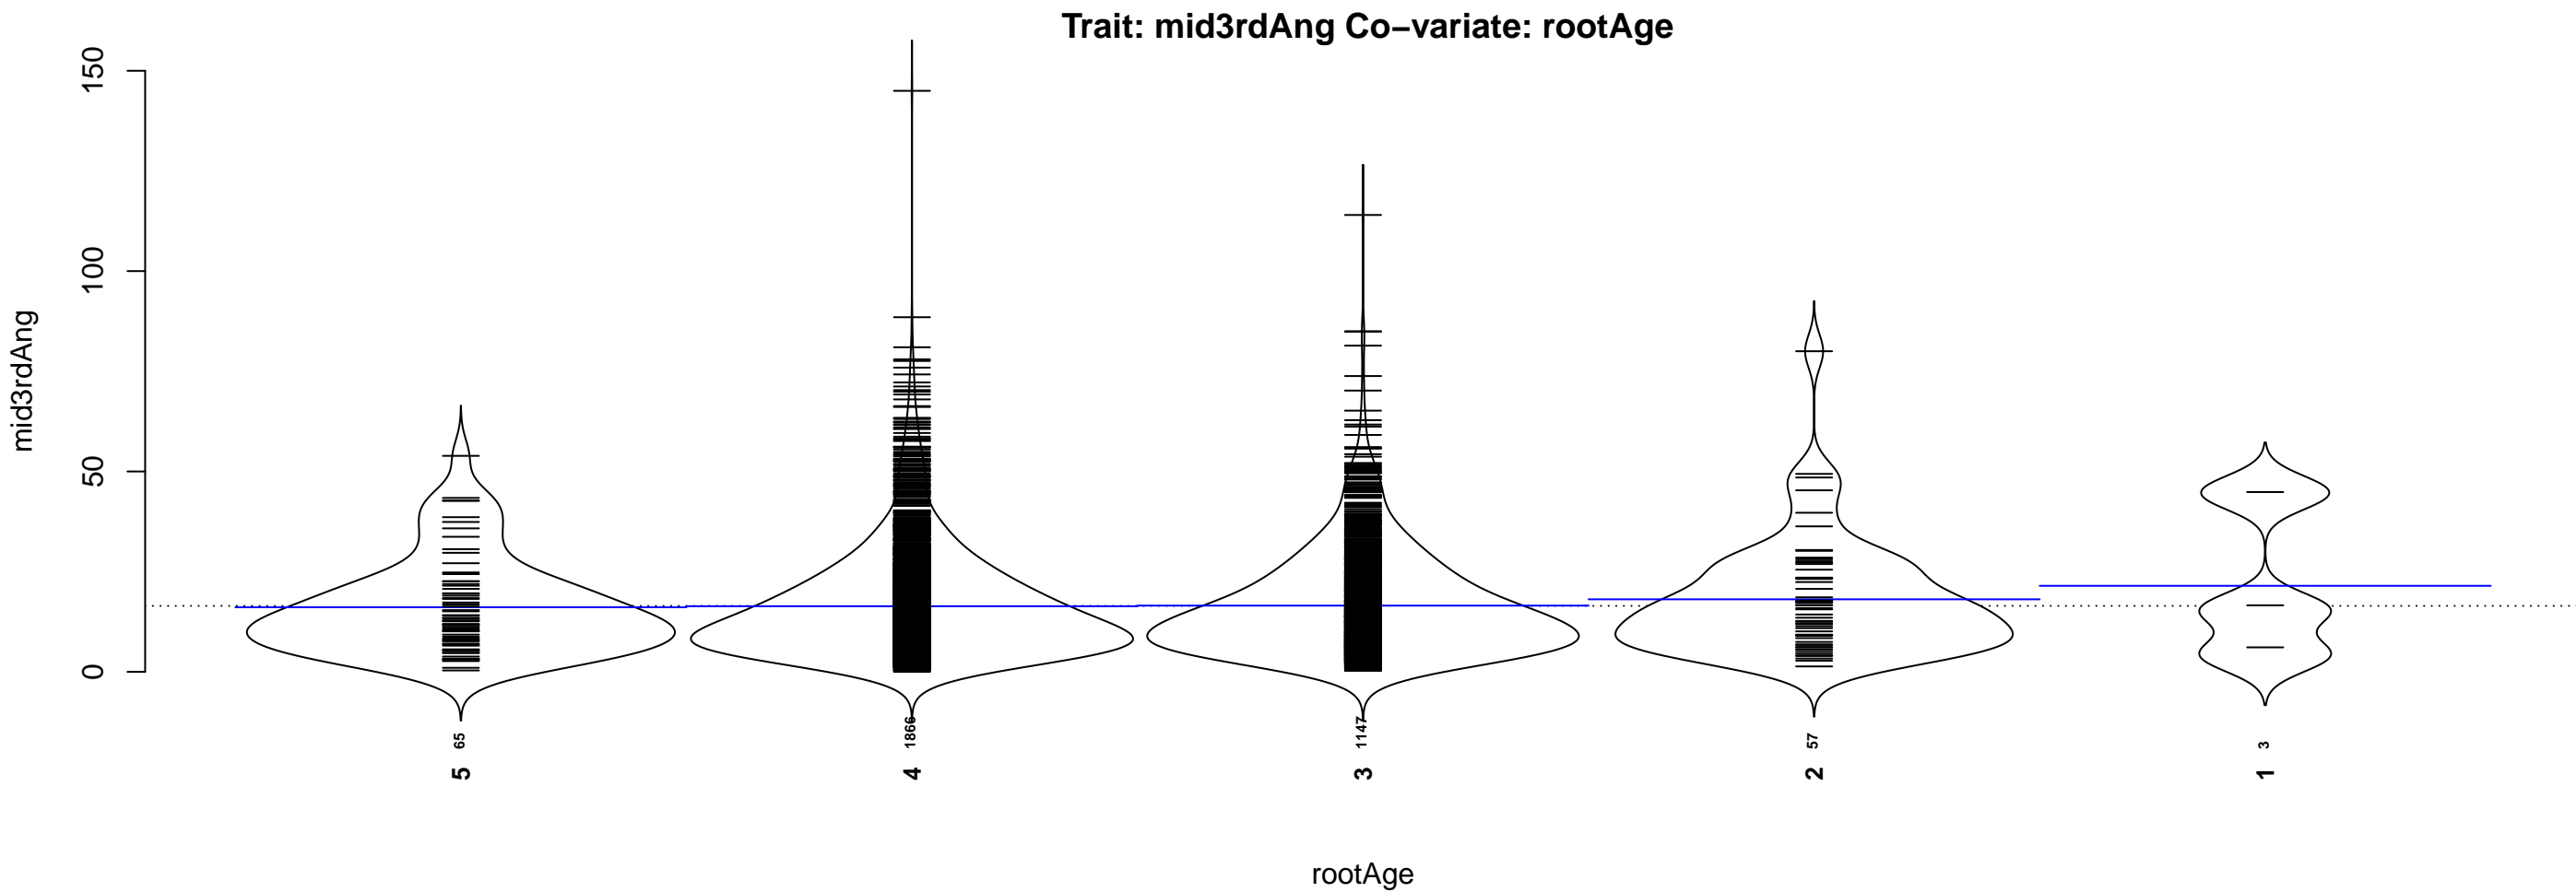

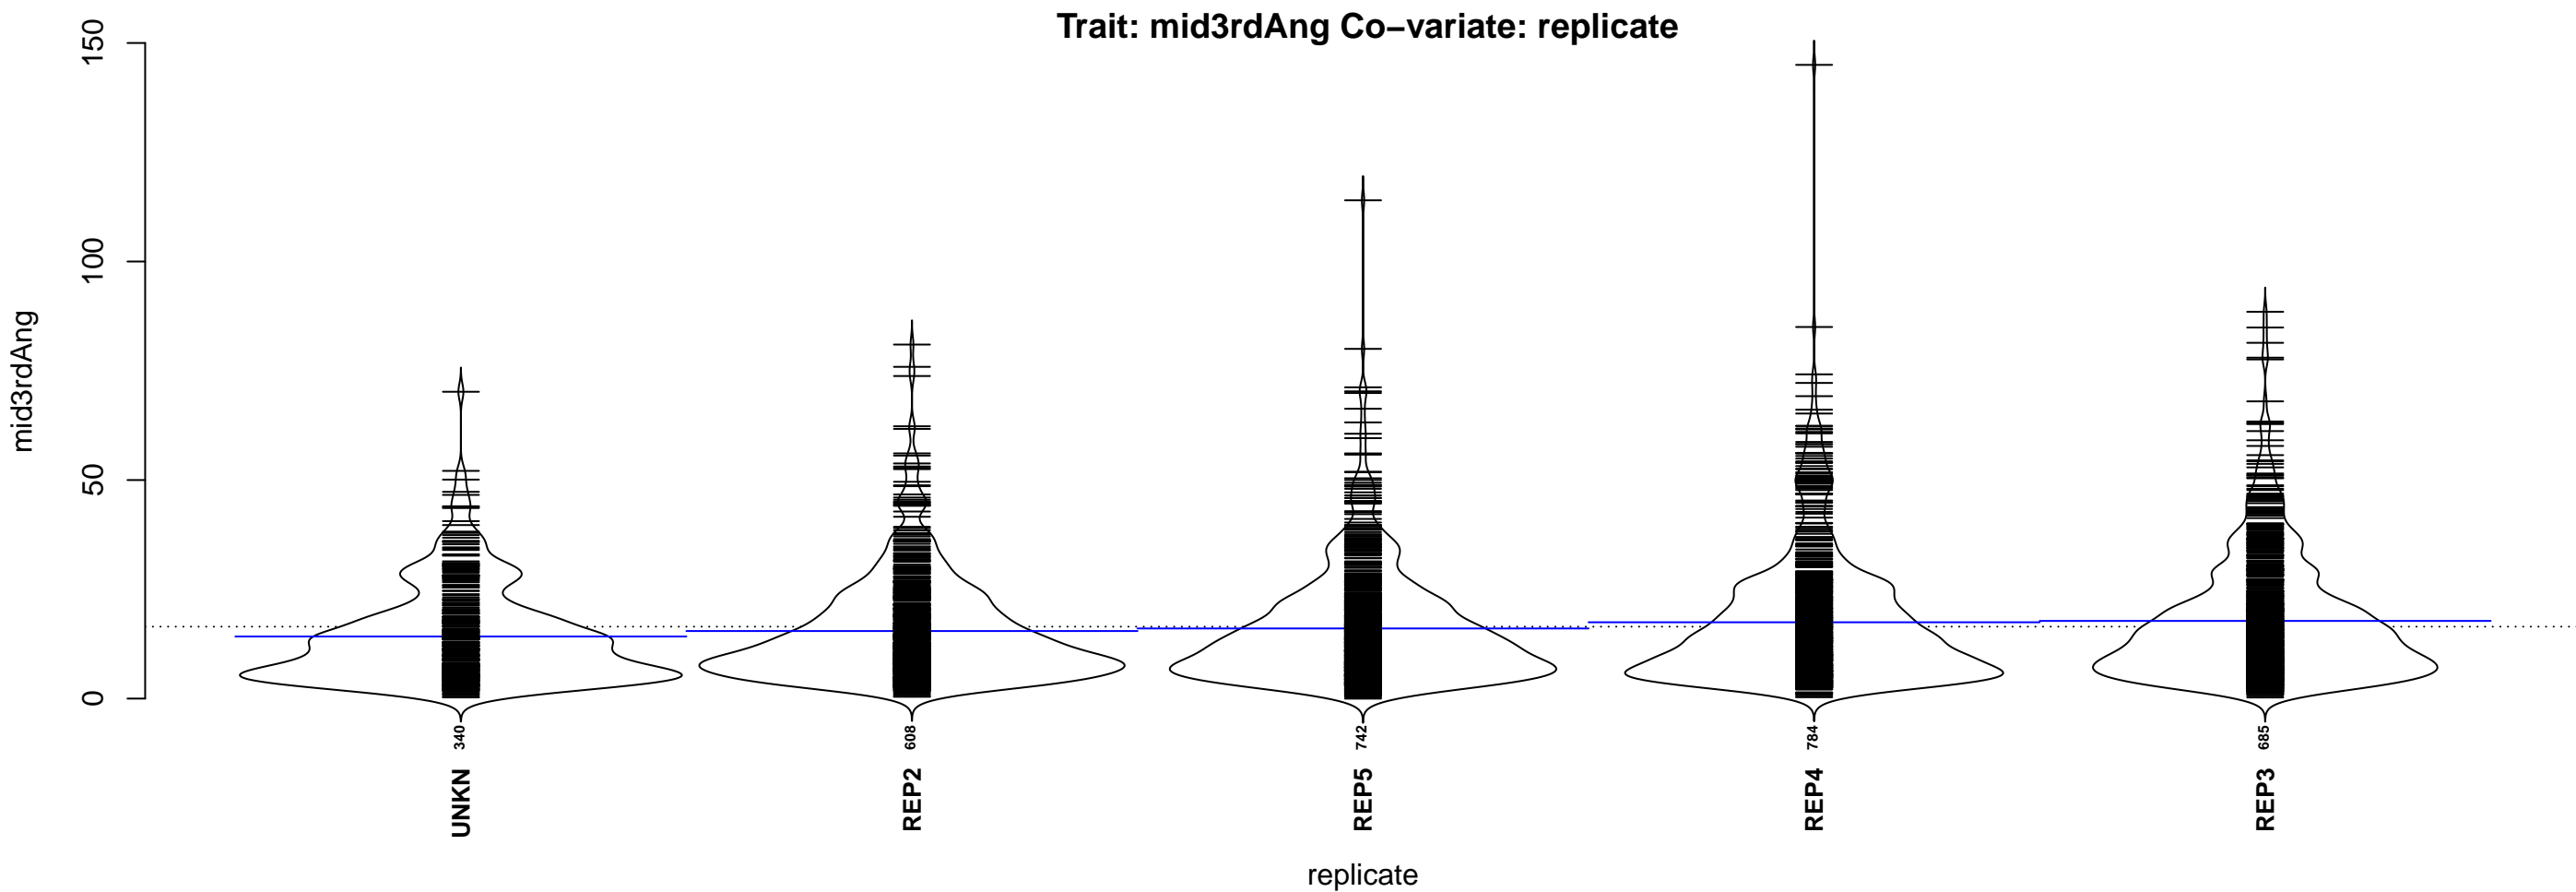

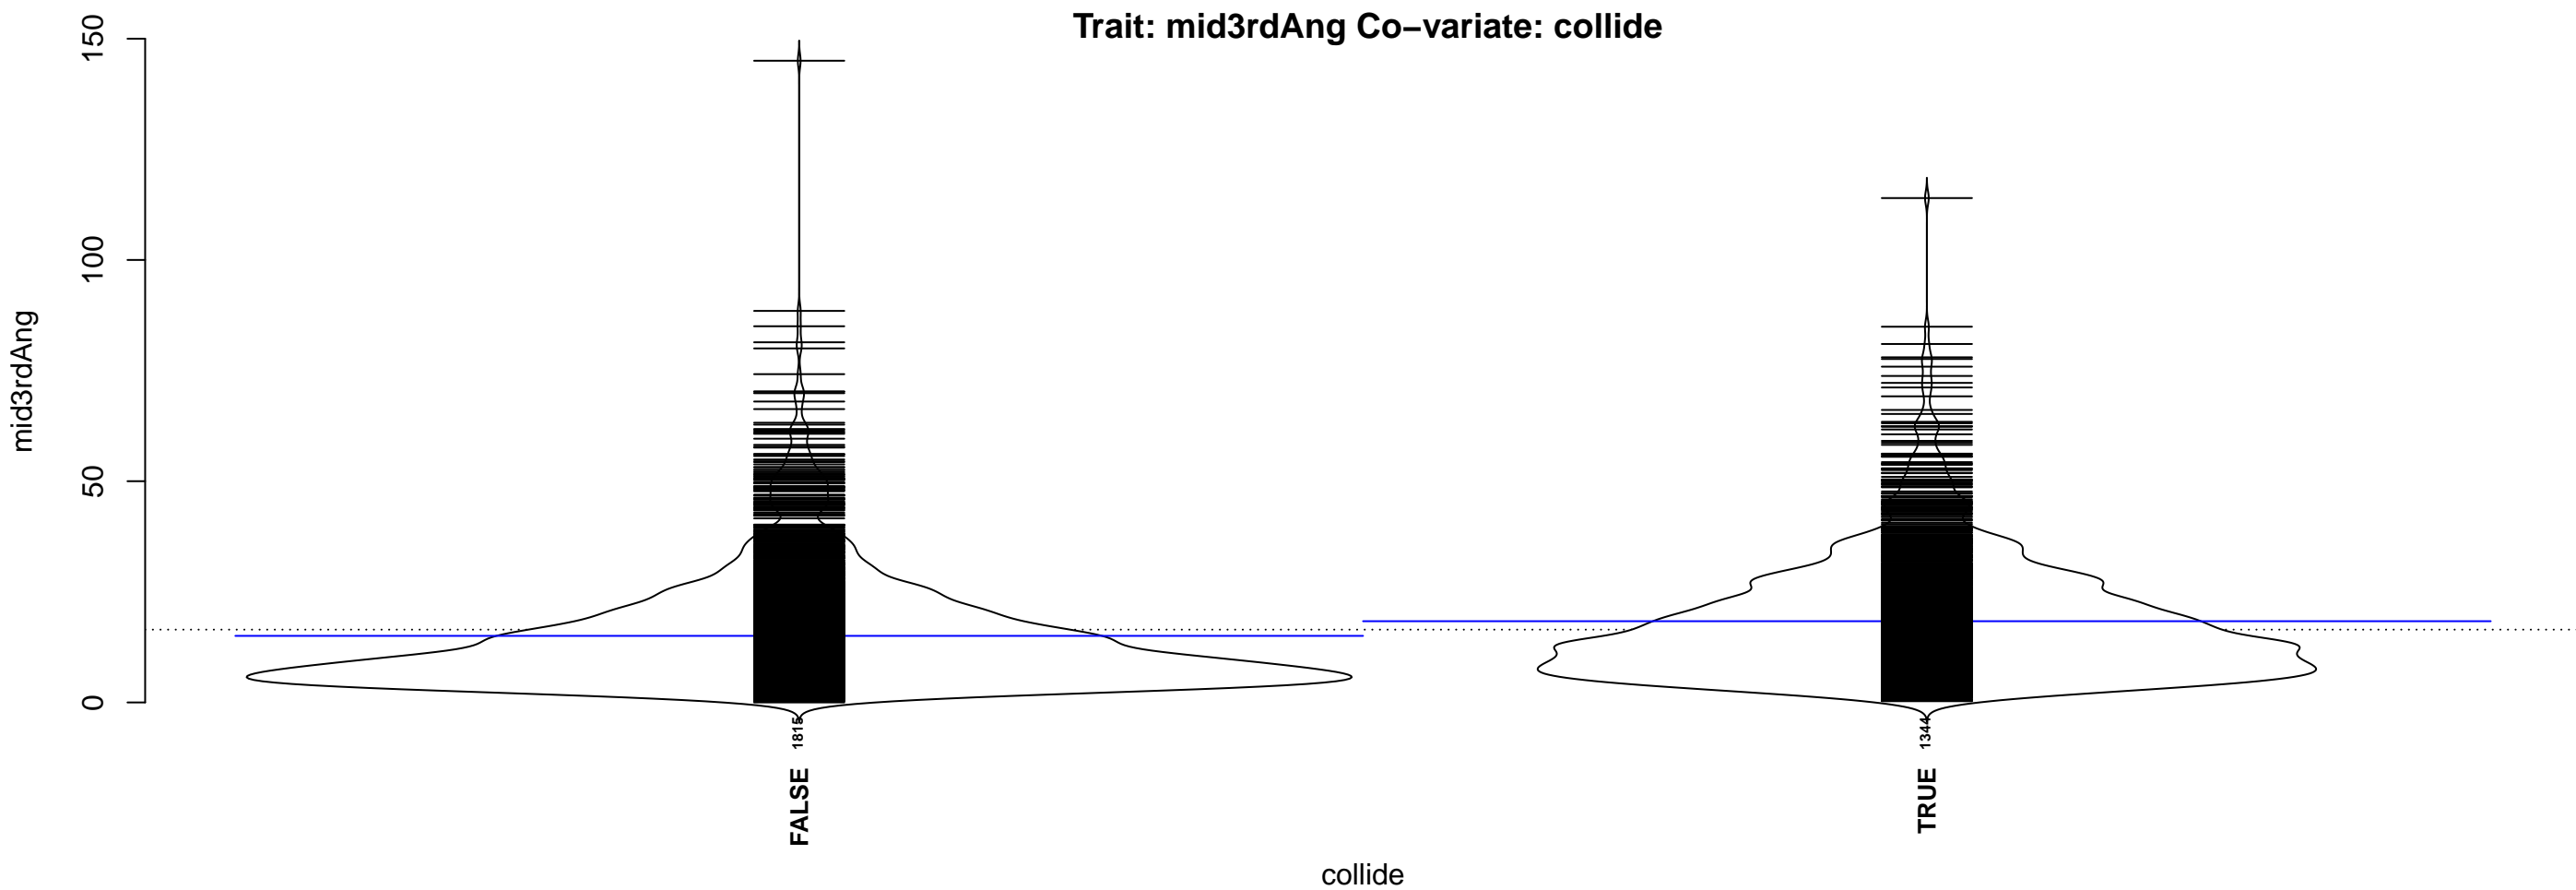

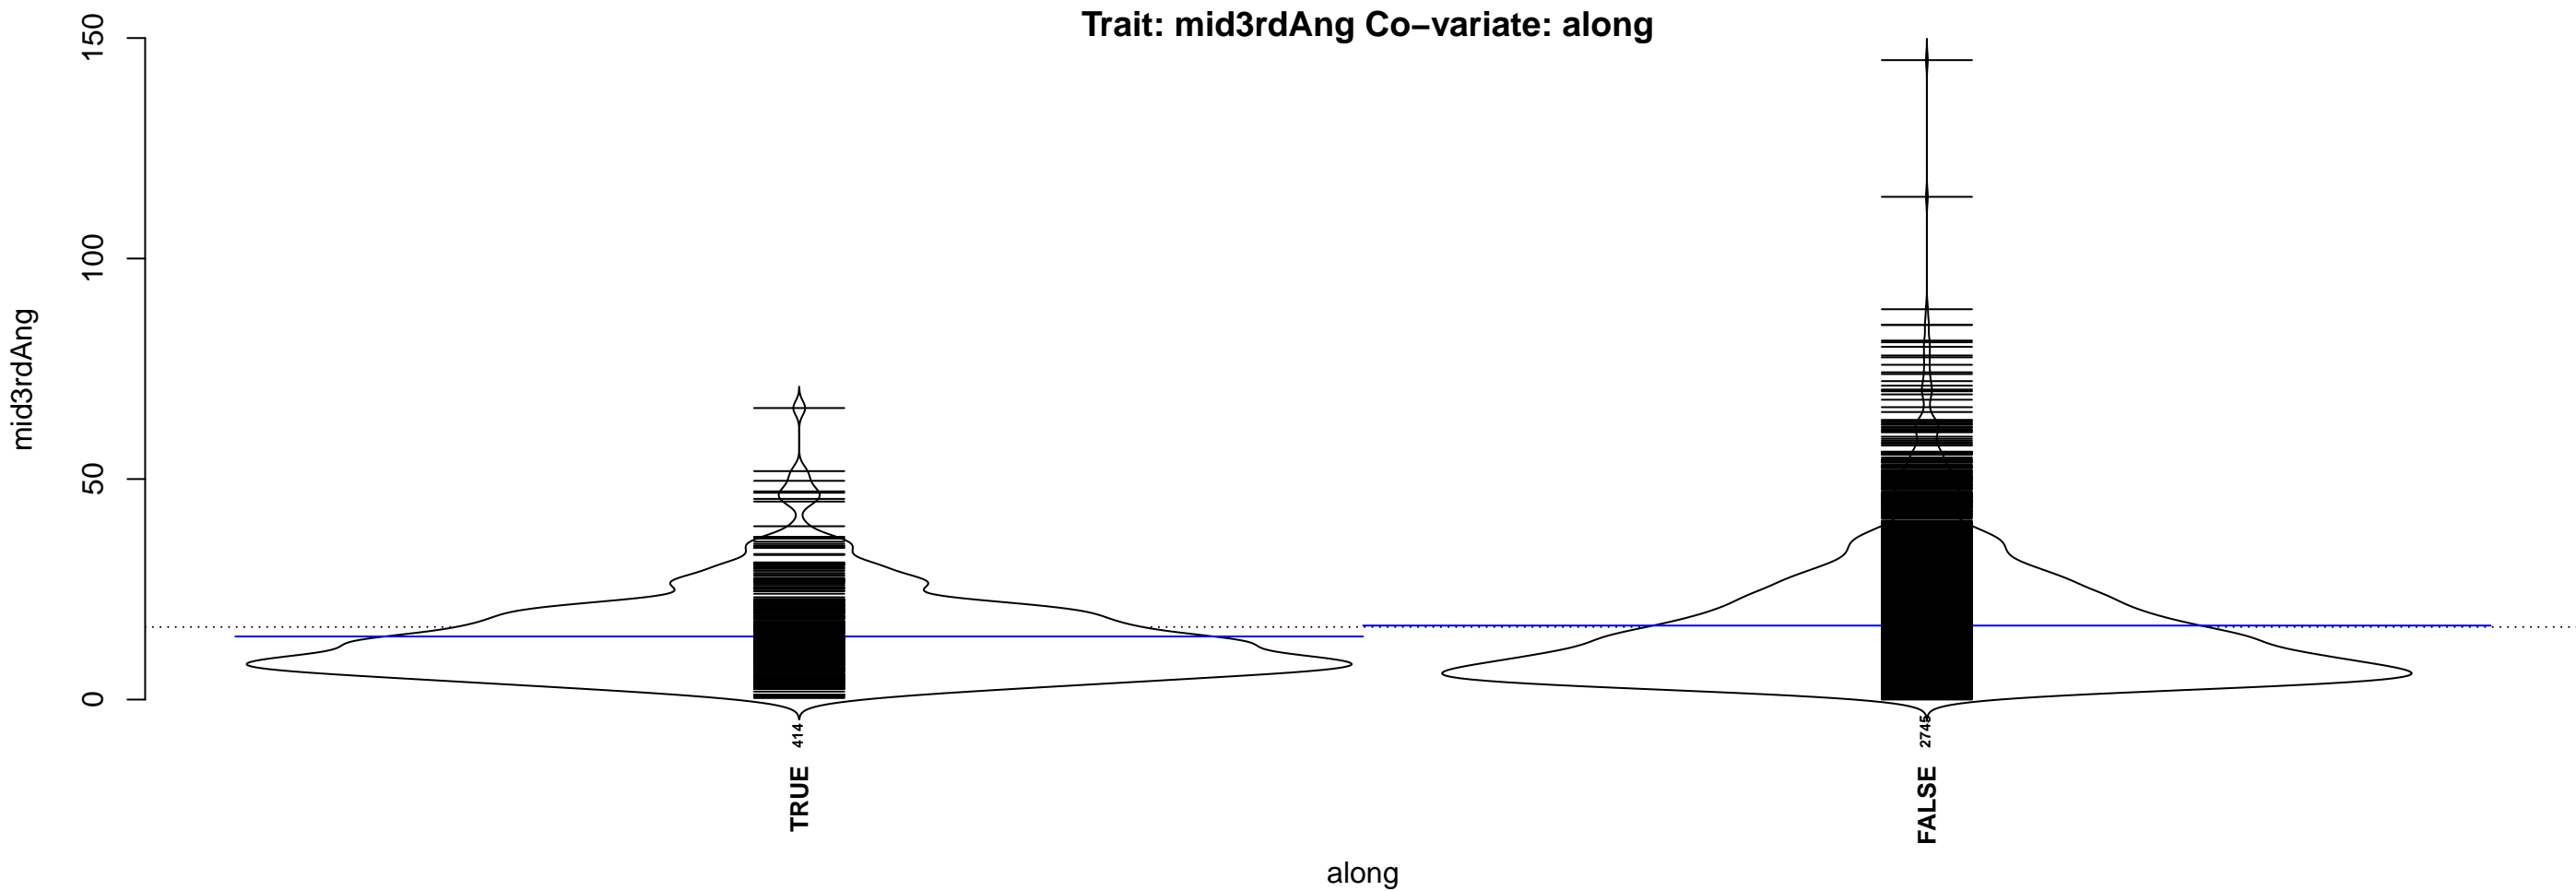

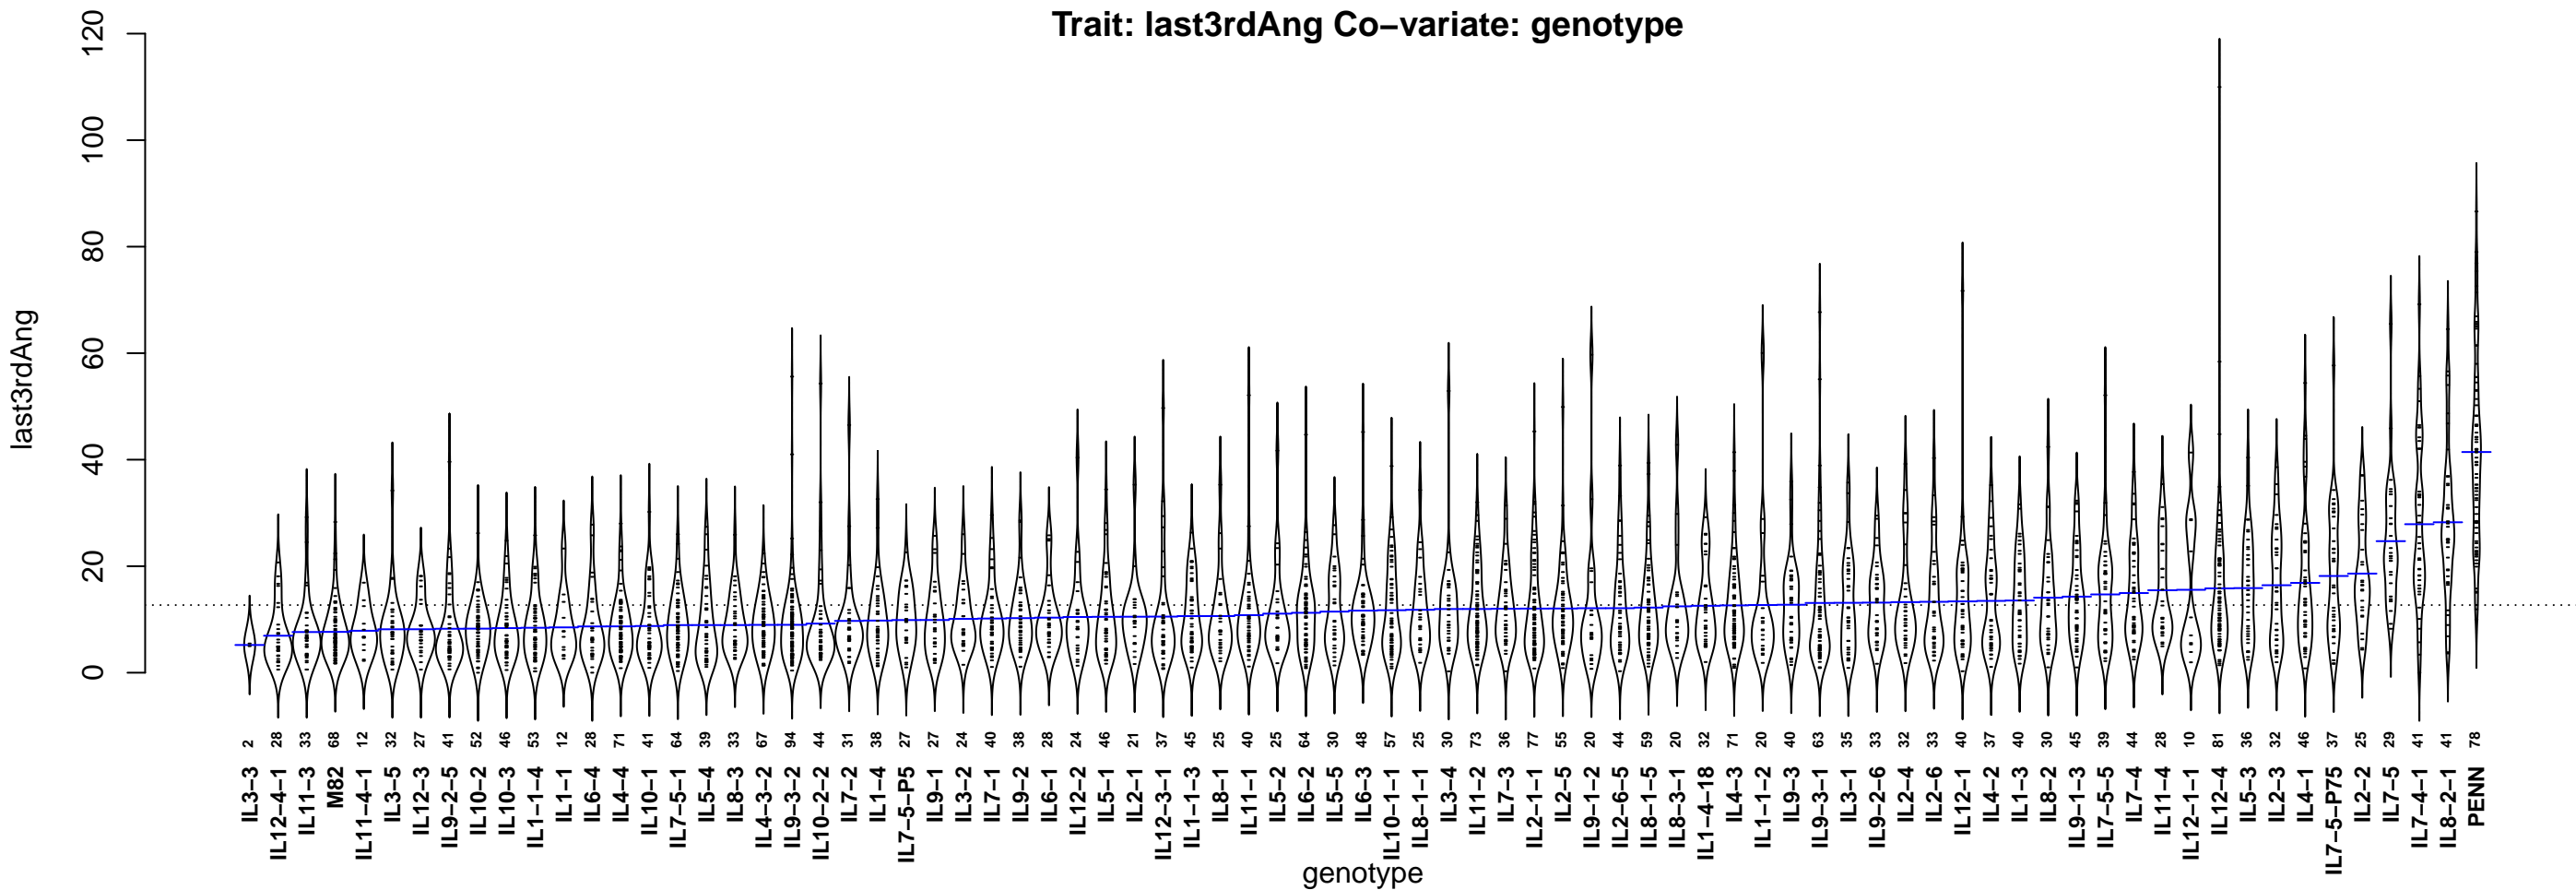

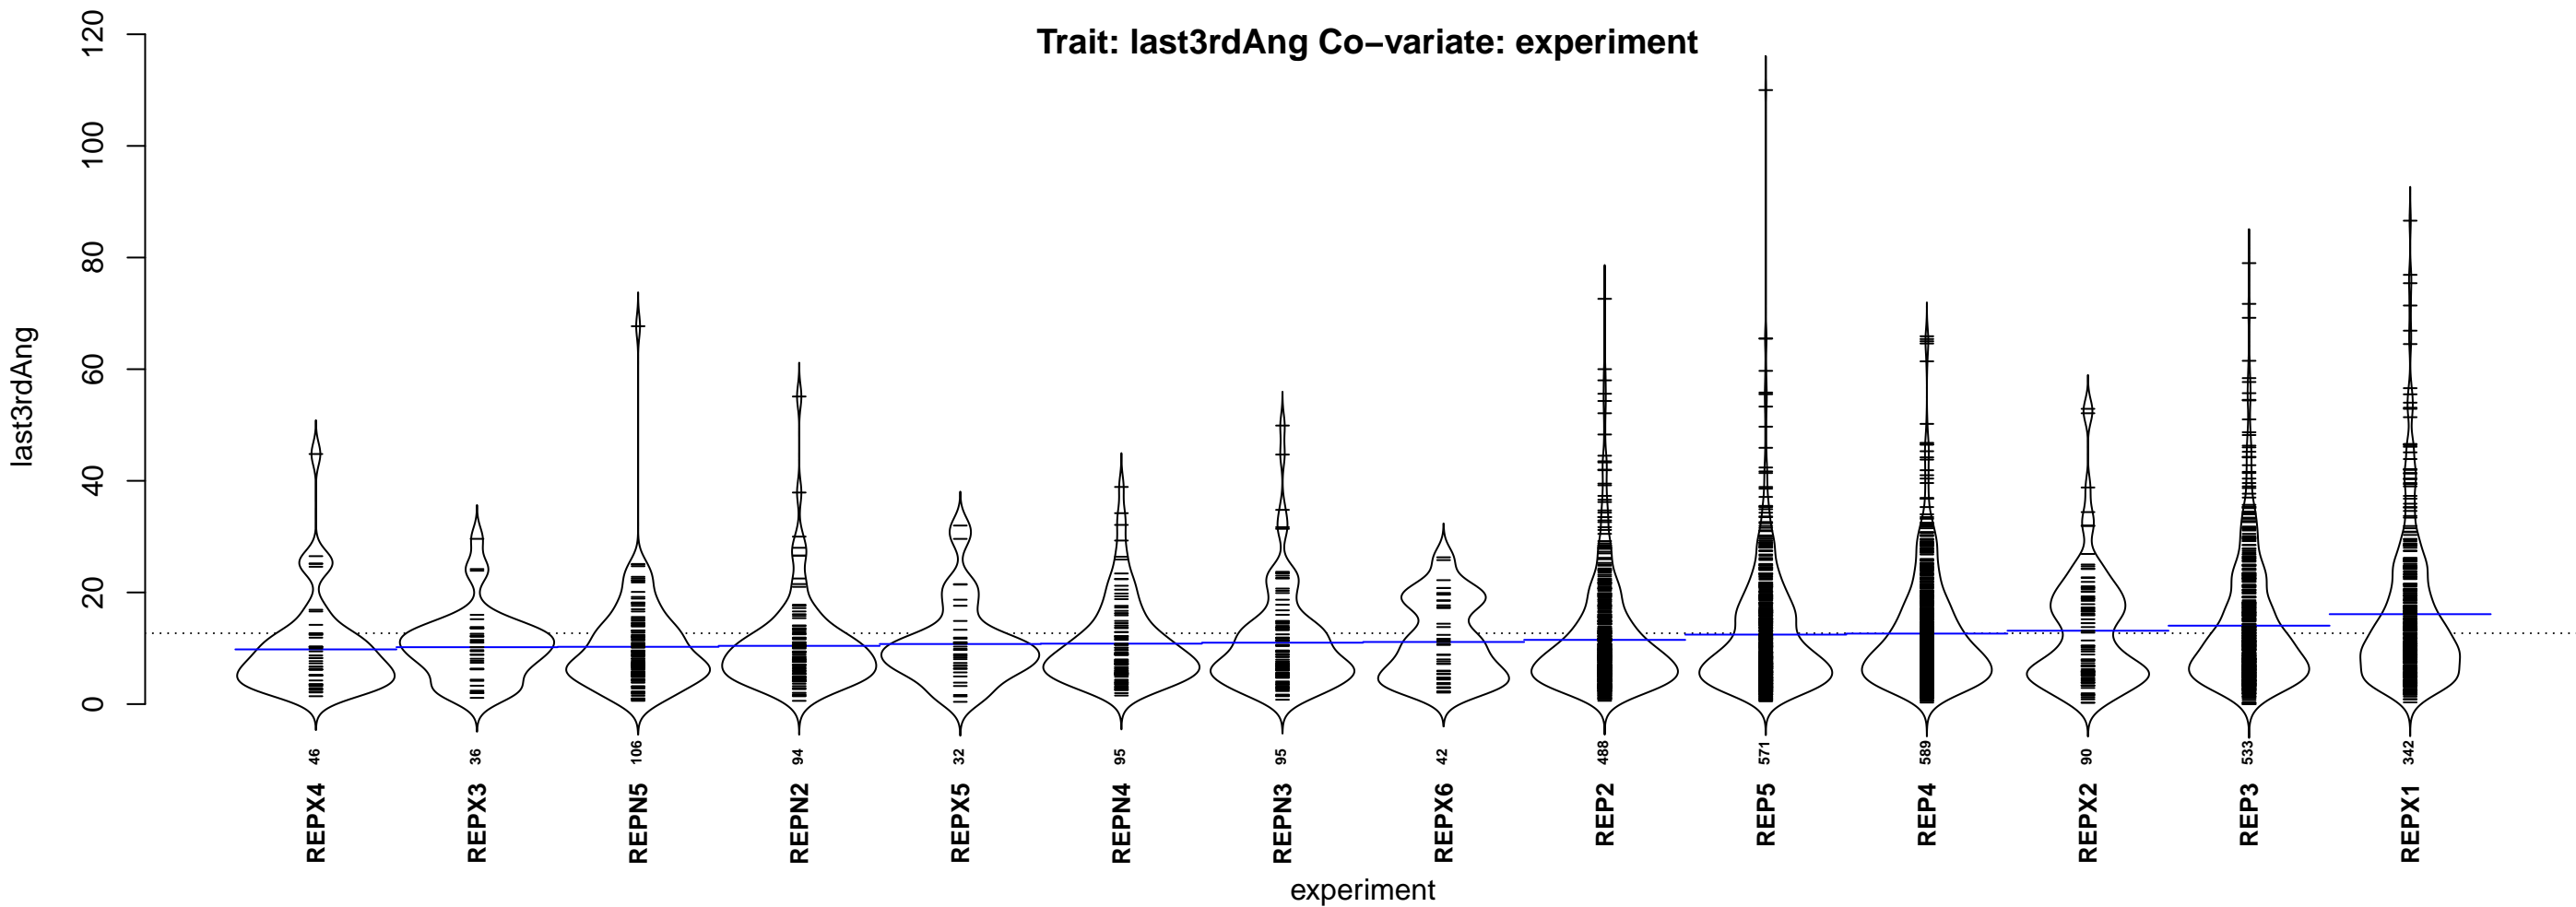

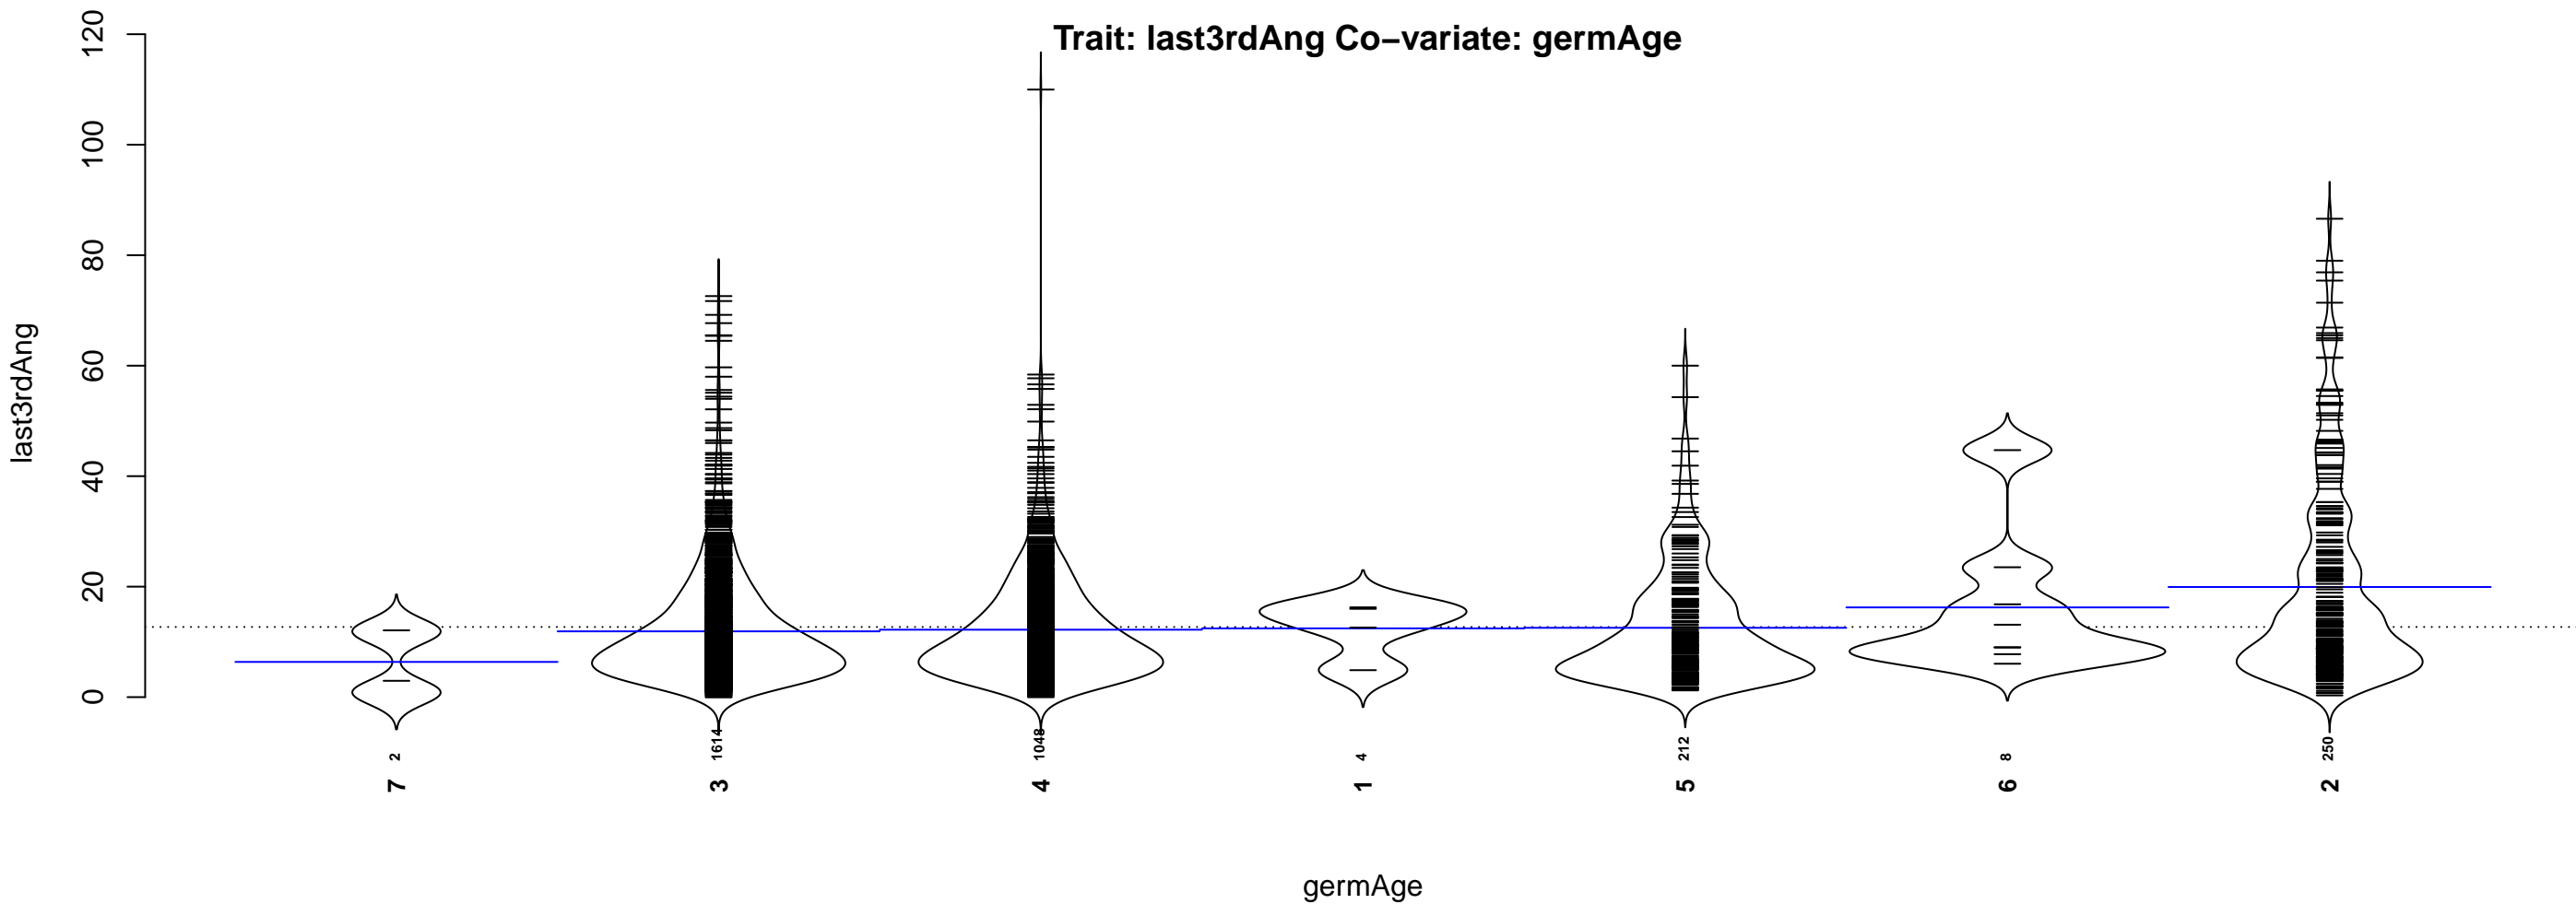

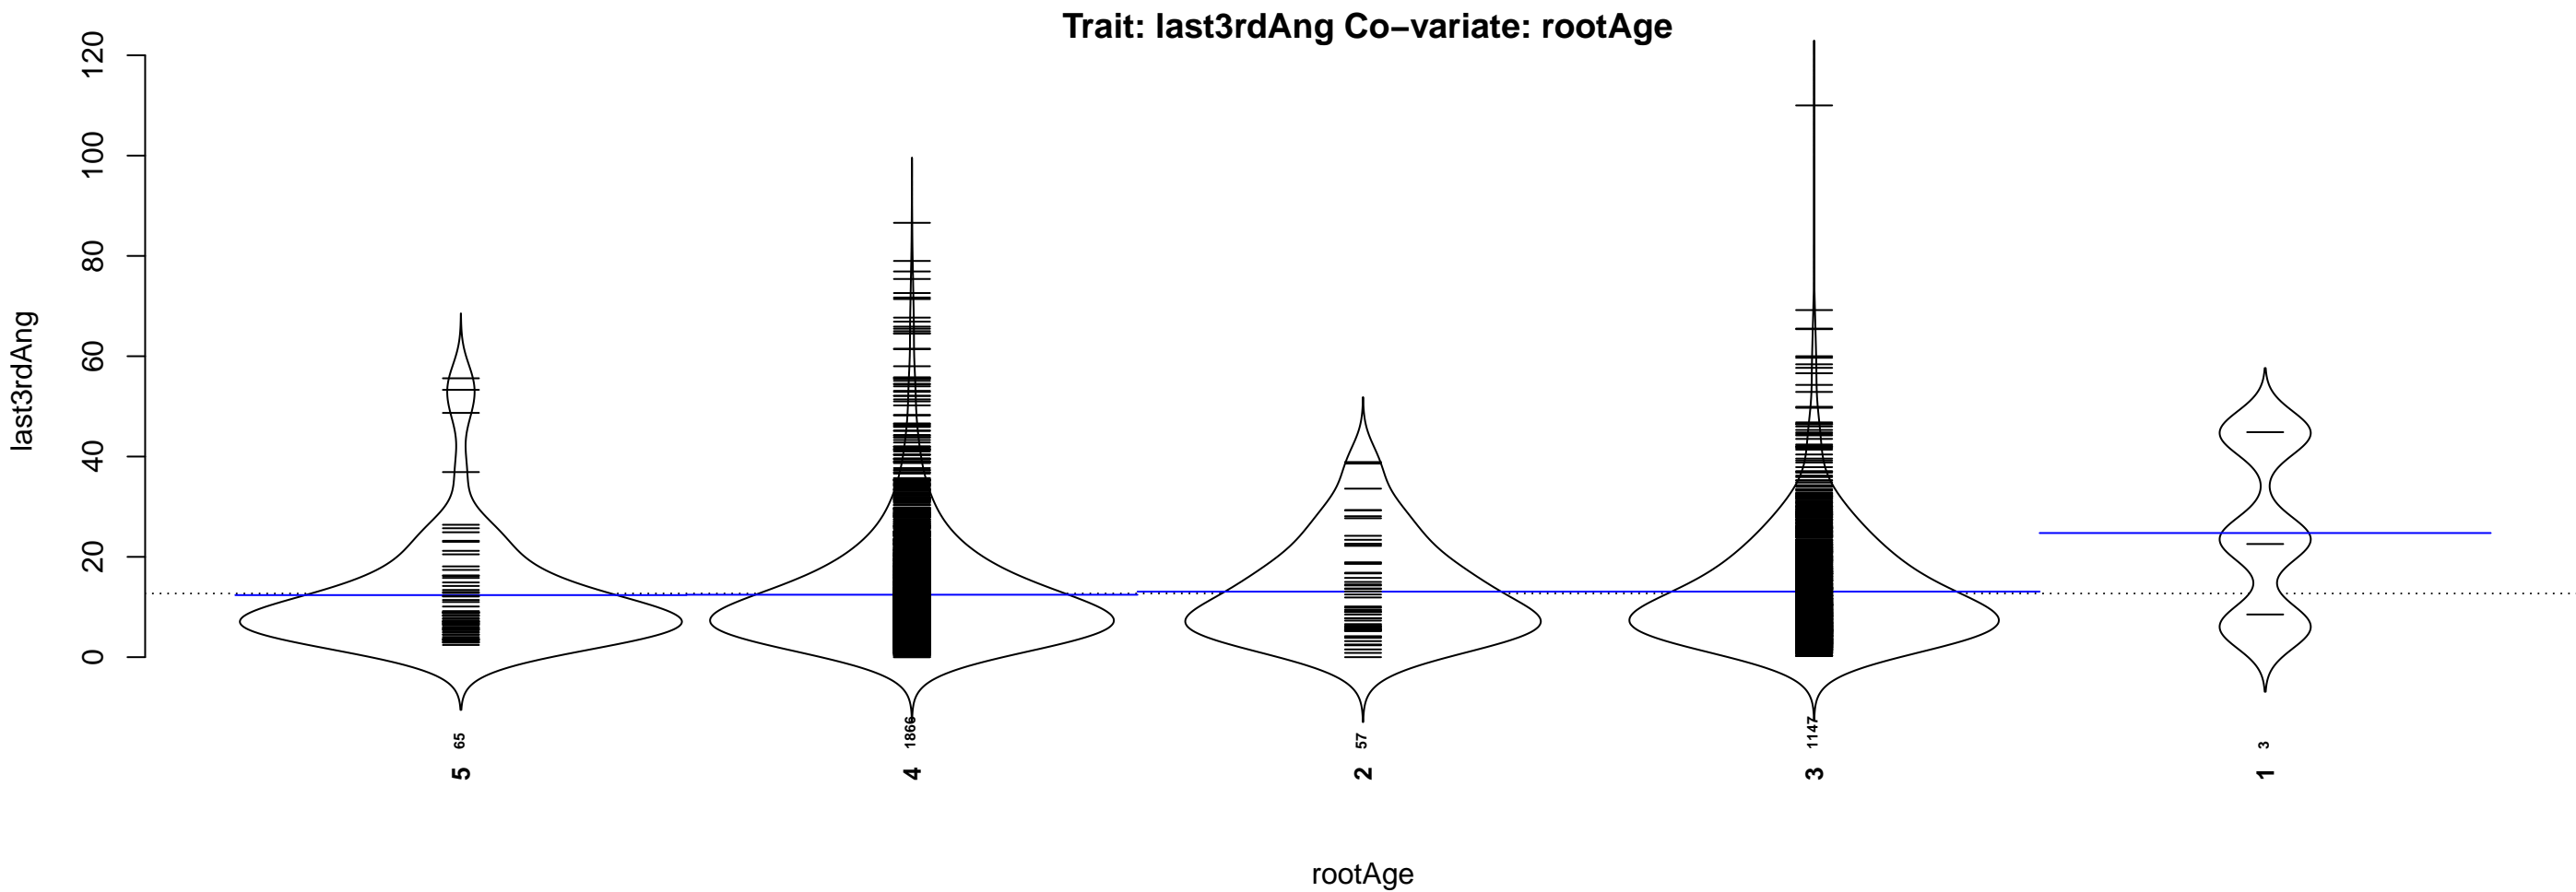

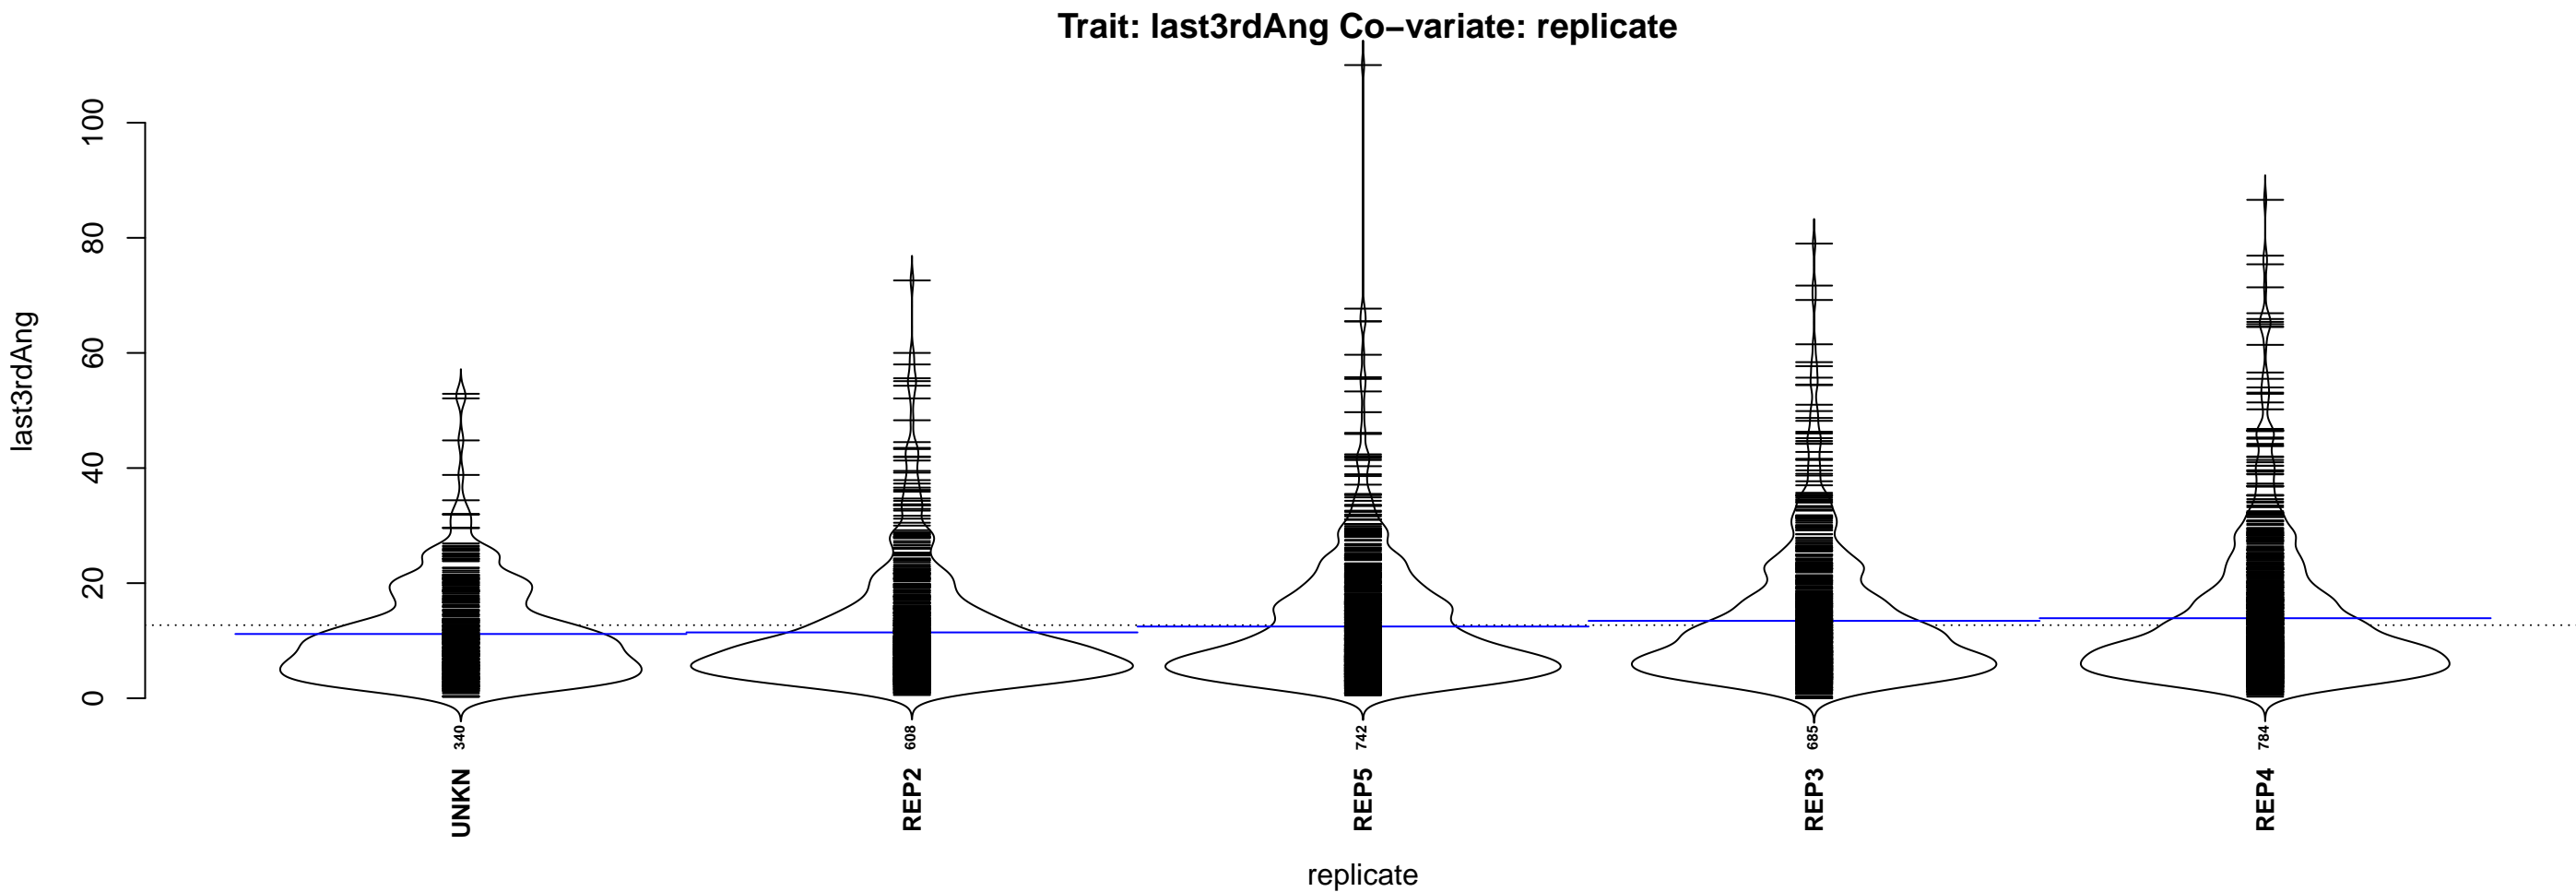

Trait: last3rdAng Co-variate: collide

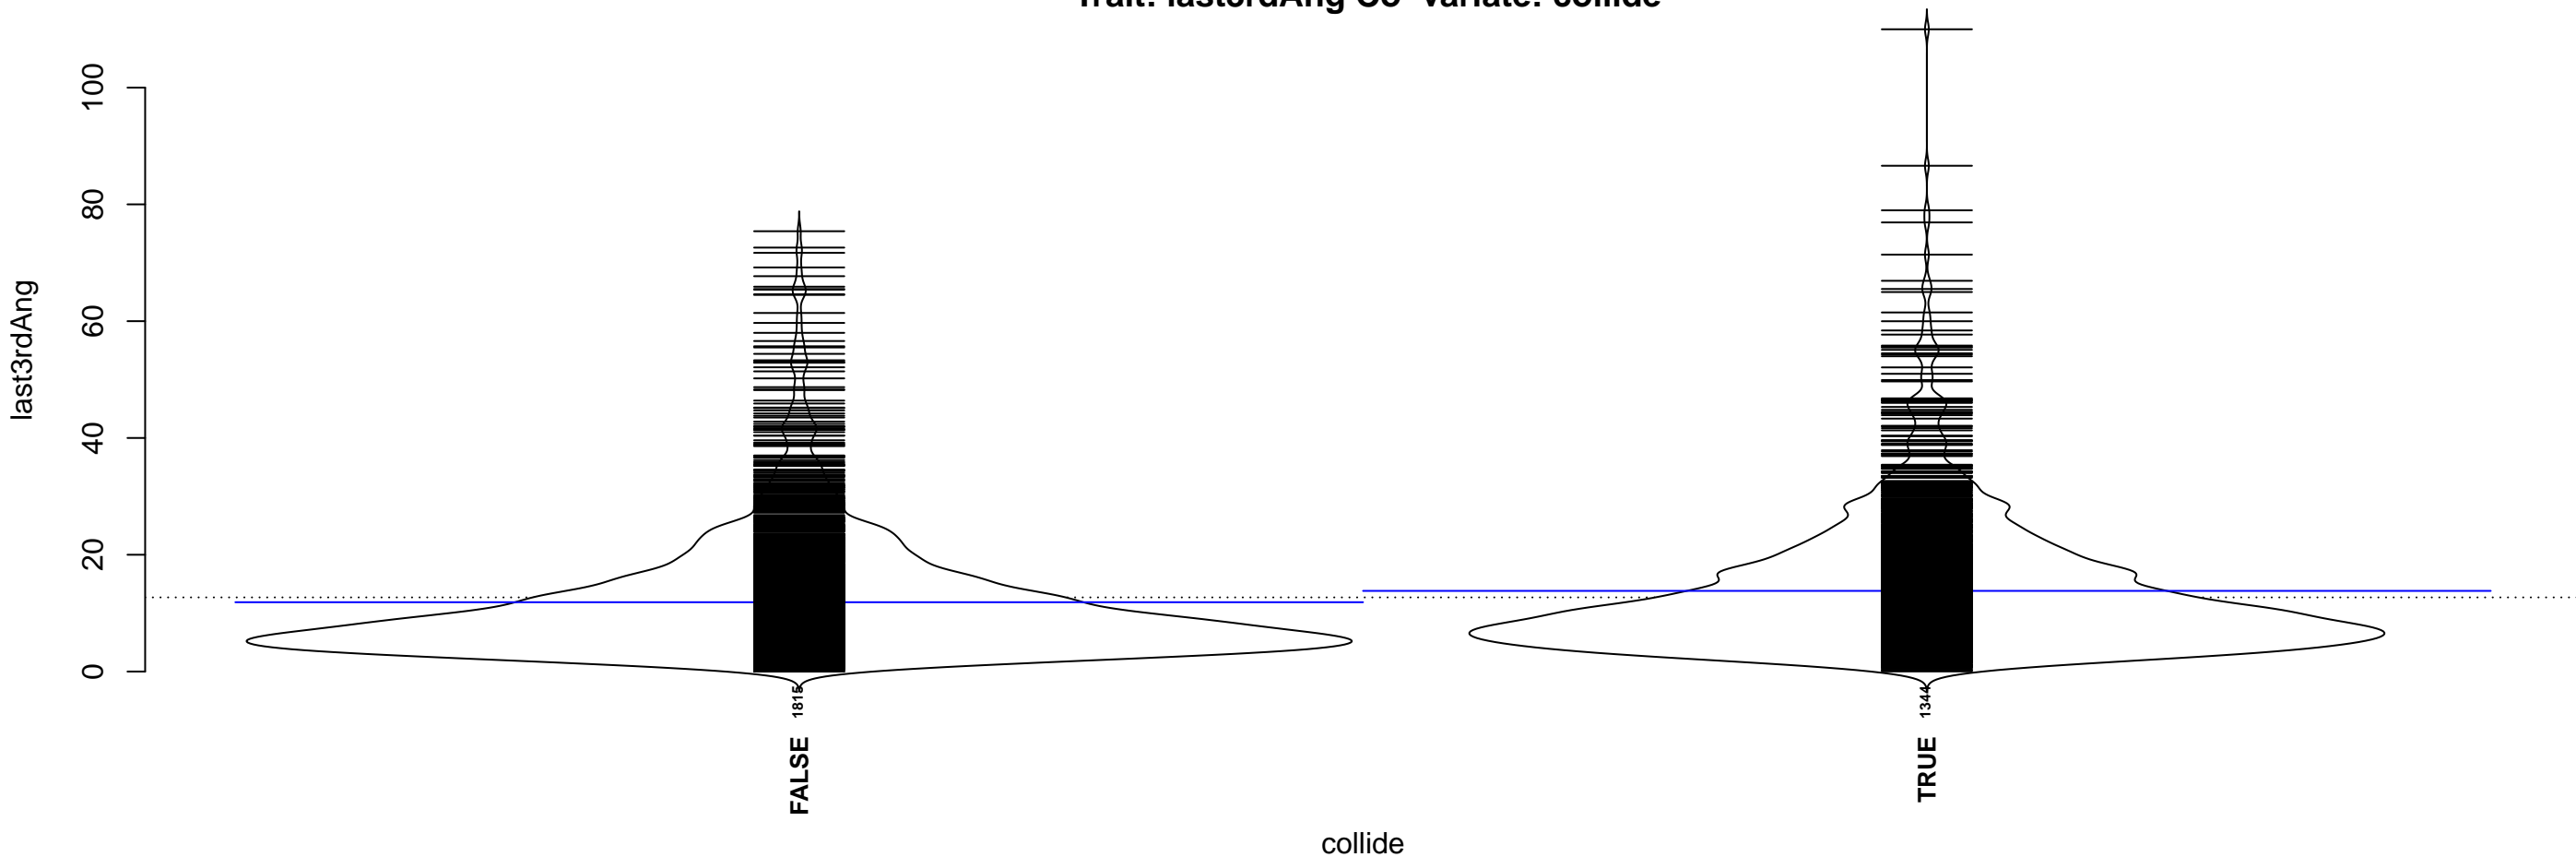

Trait: last3rdAng Co-variate: along

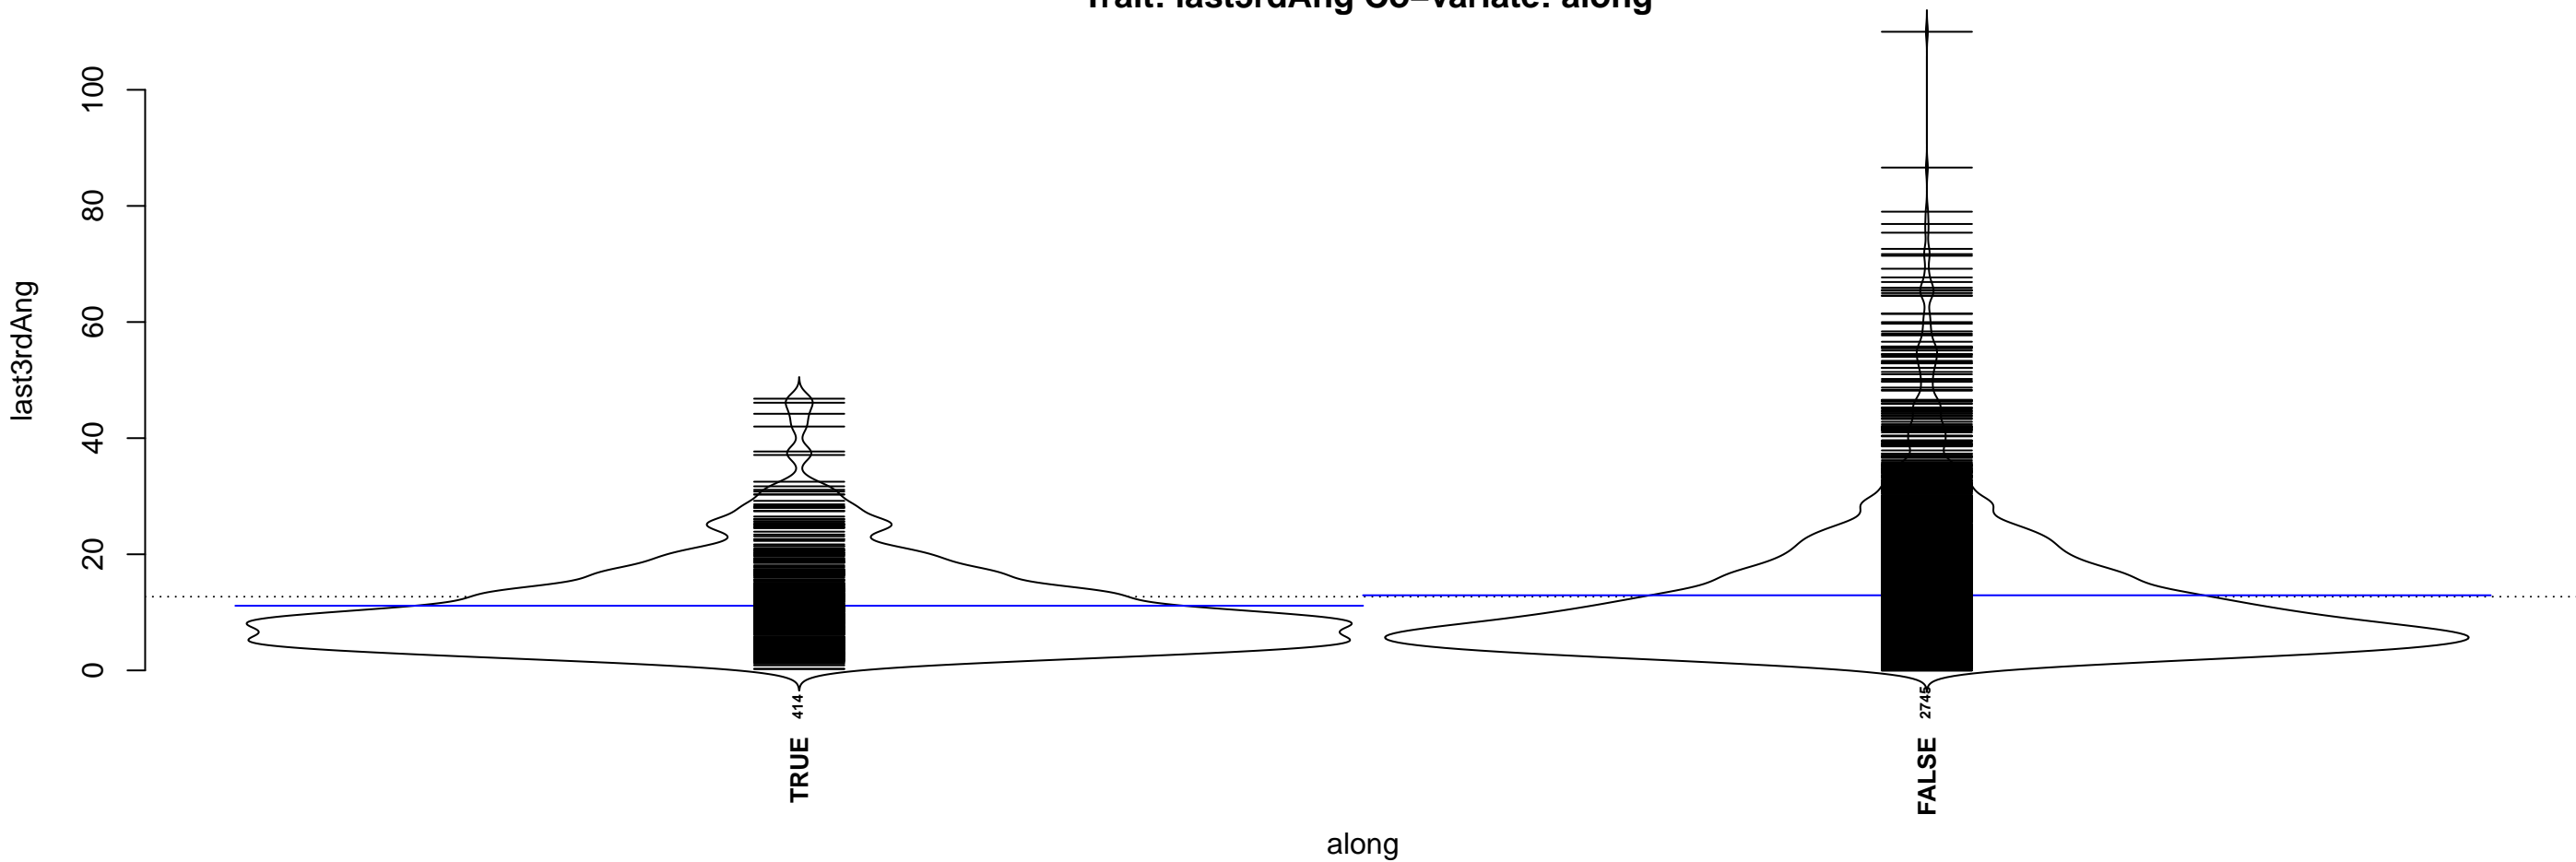

Trait: tipAngSign Co-variate: genotype

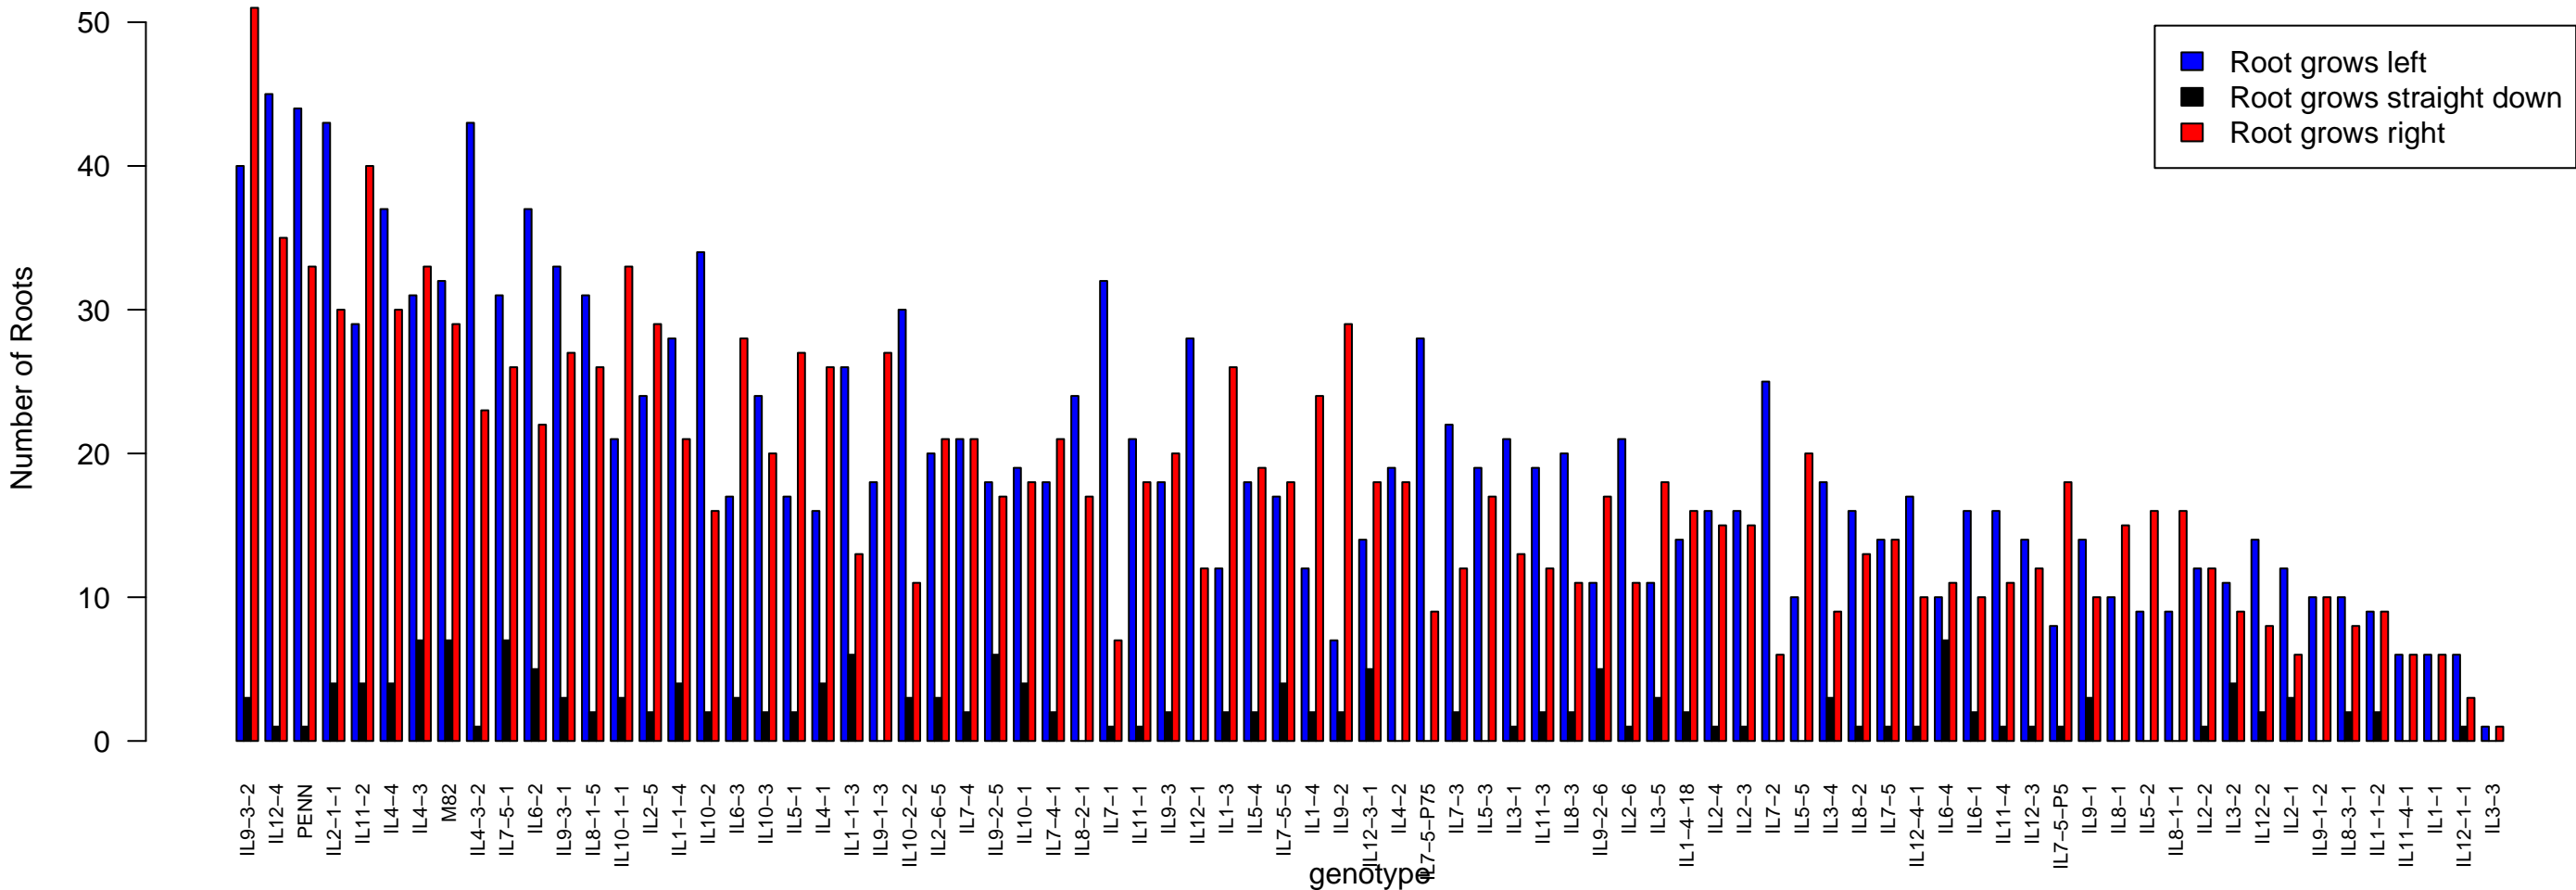

Trait: tipAngSign Co-variate: experiment

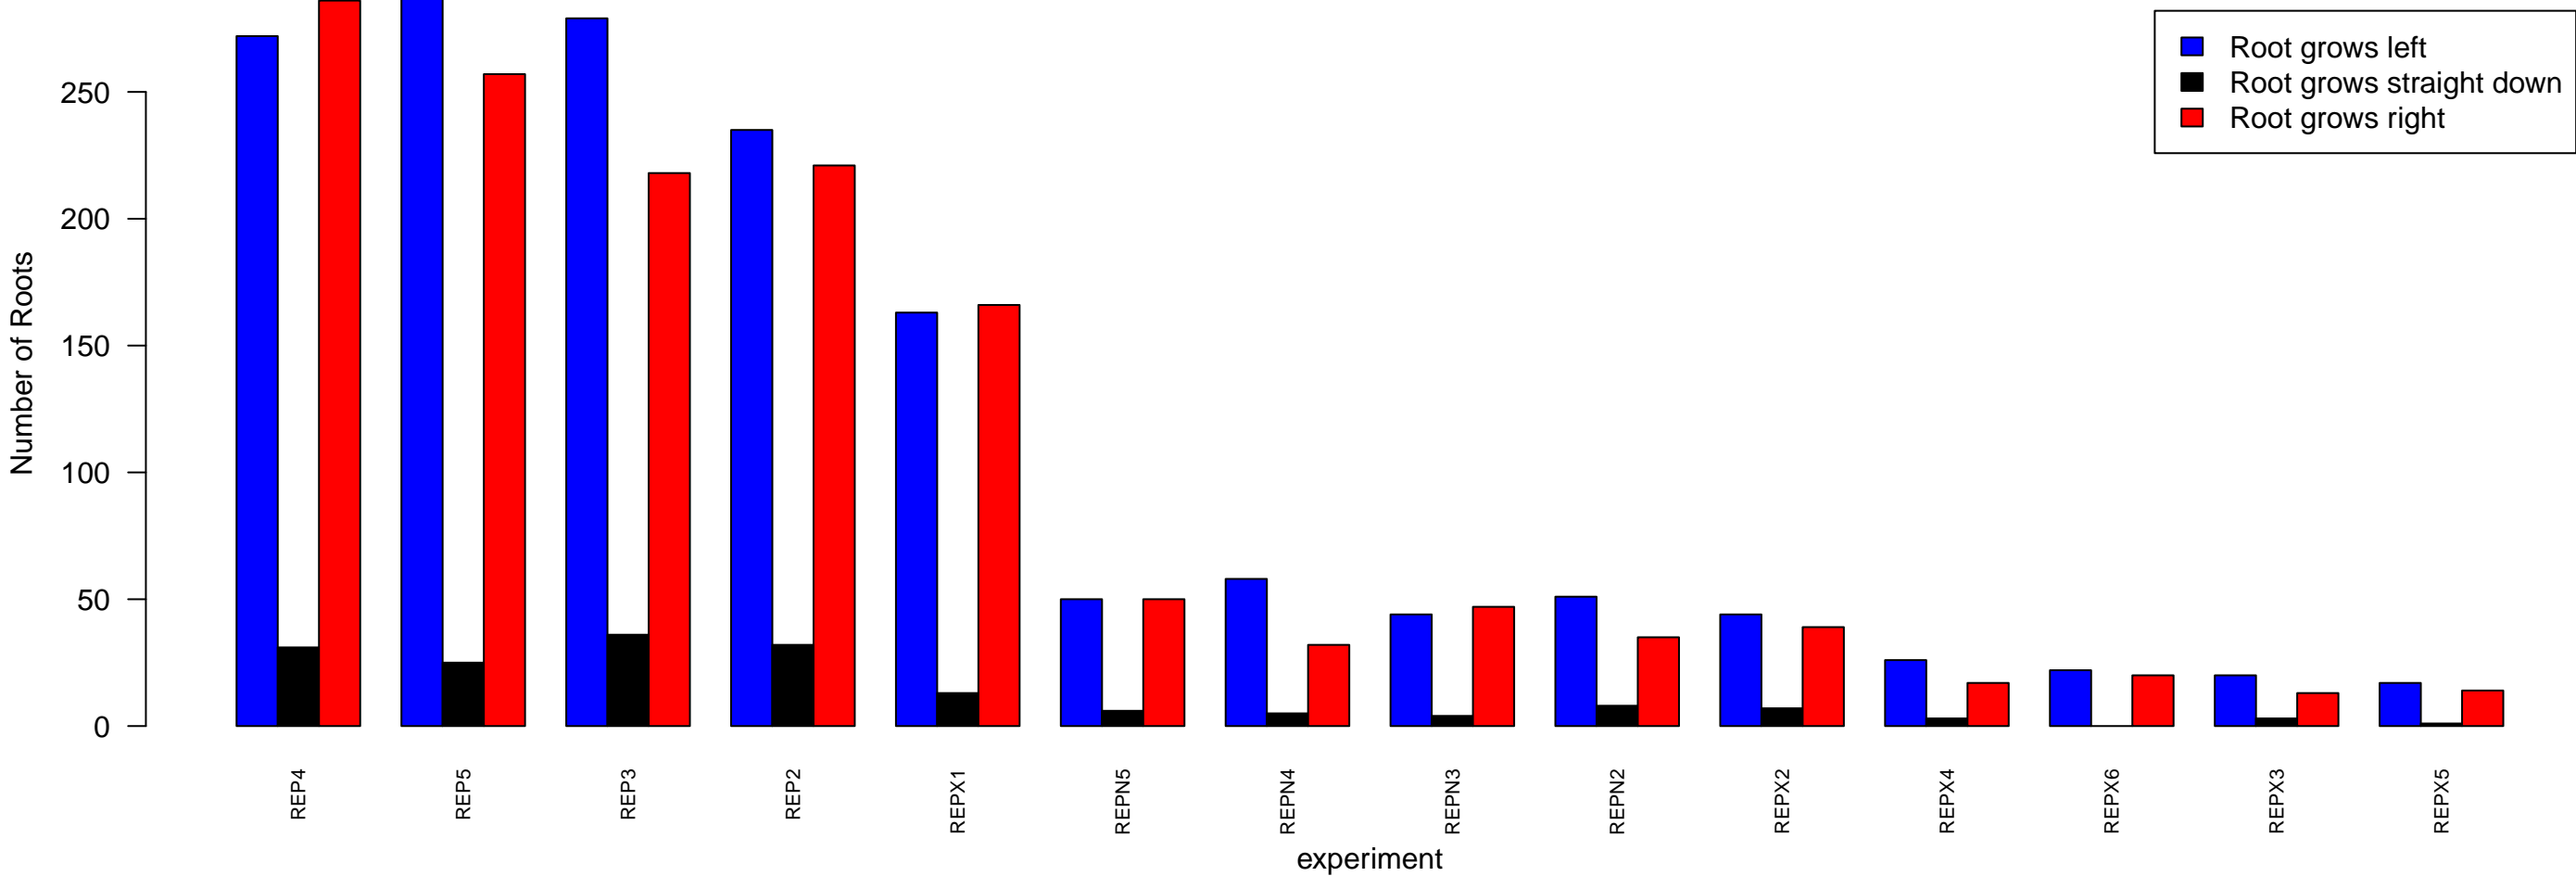

Trait: tipAngSign Co-variate: germAge

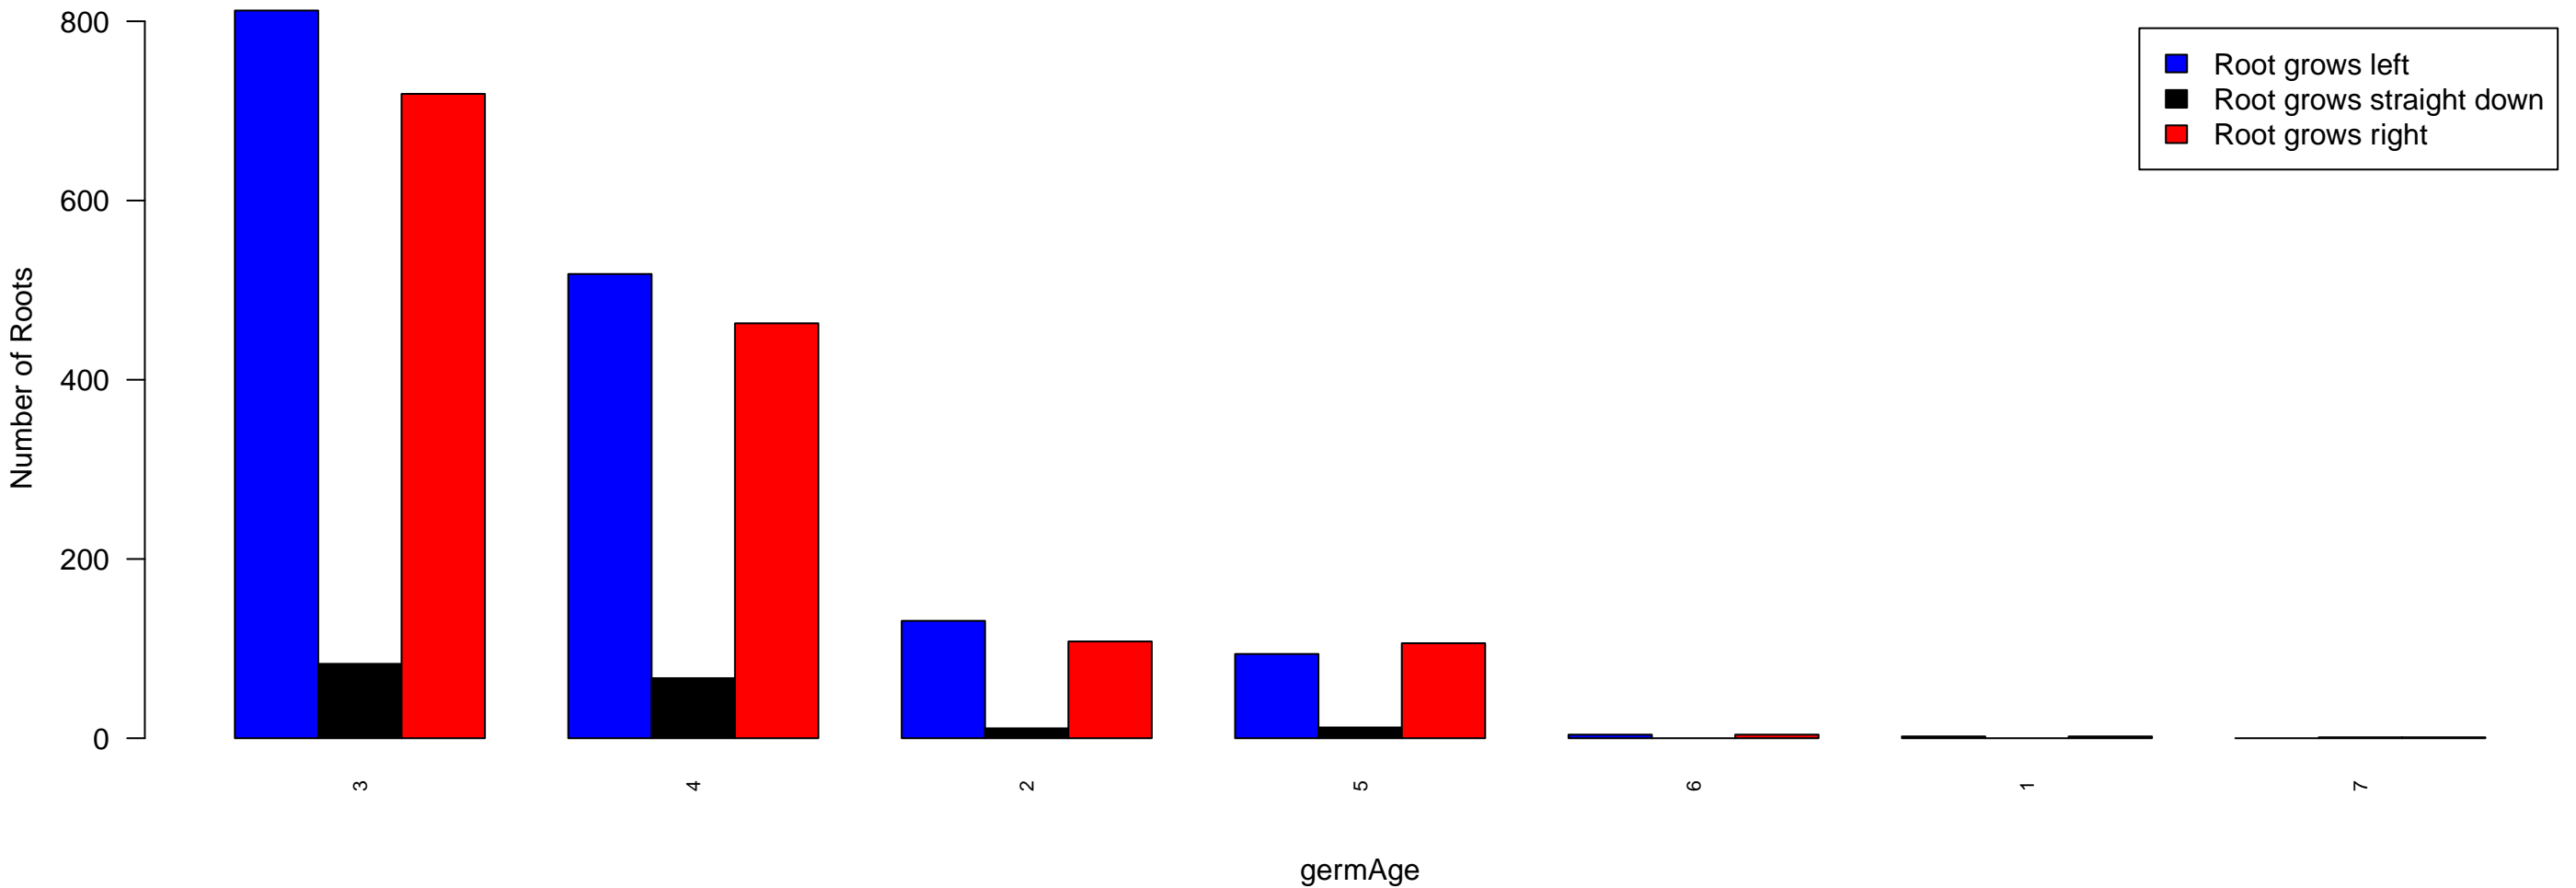

Trait: tipAngSign Co-variate: rootAge

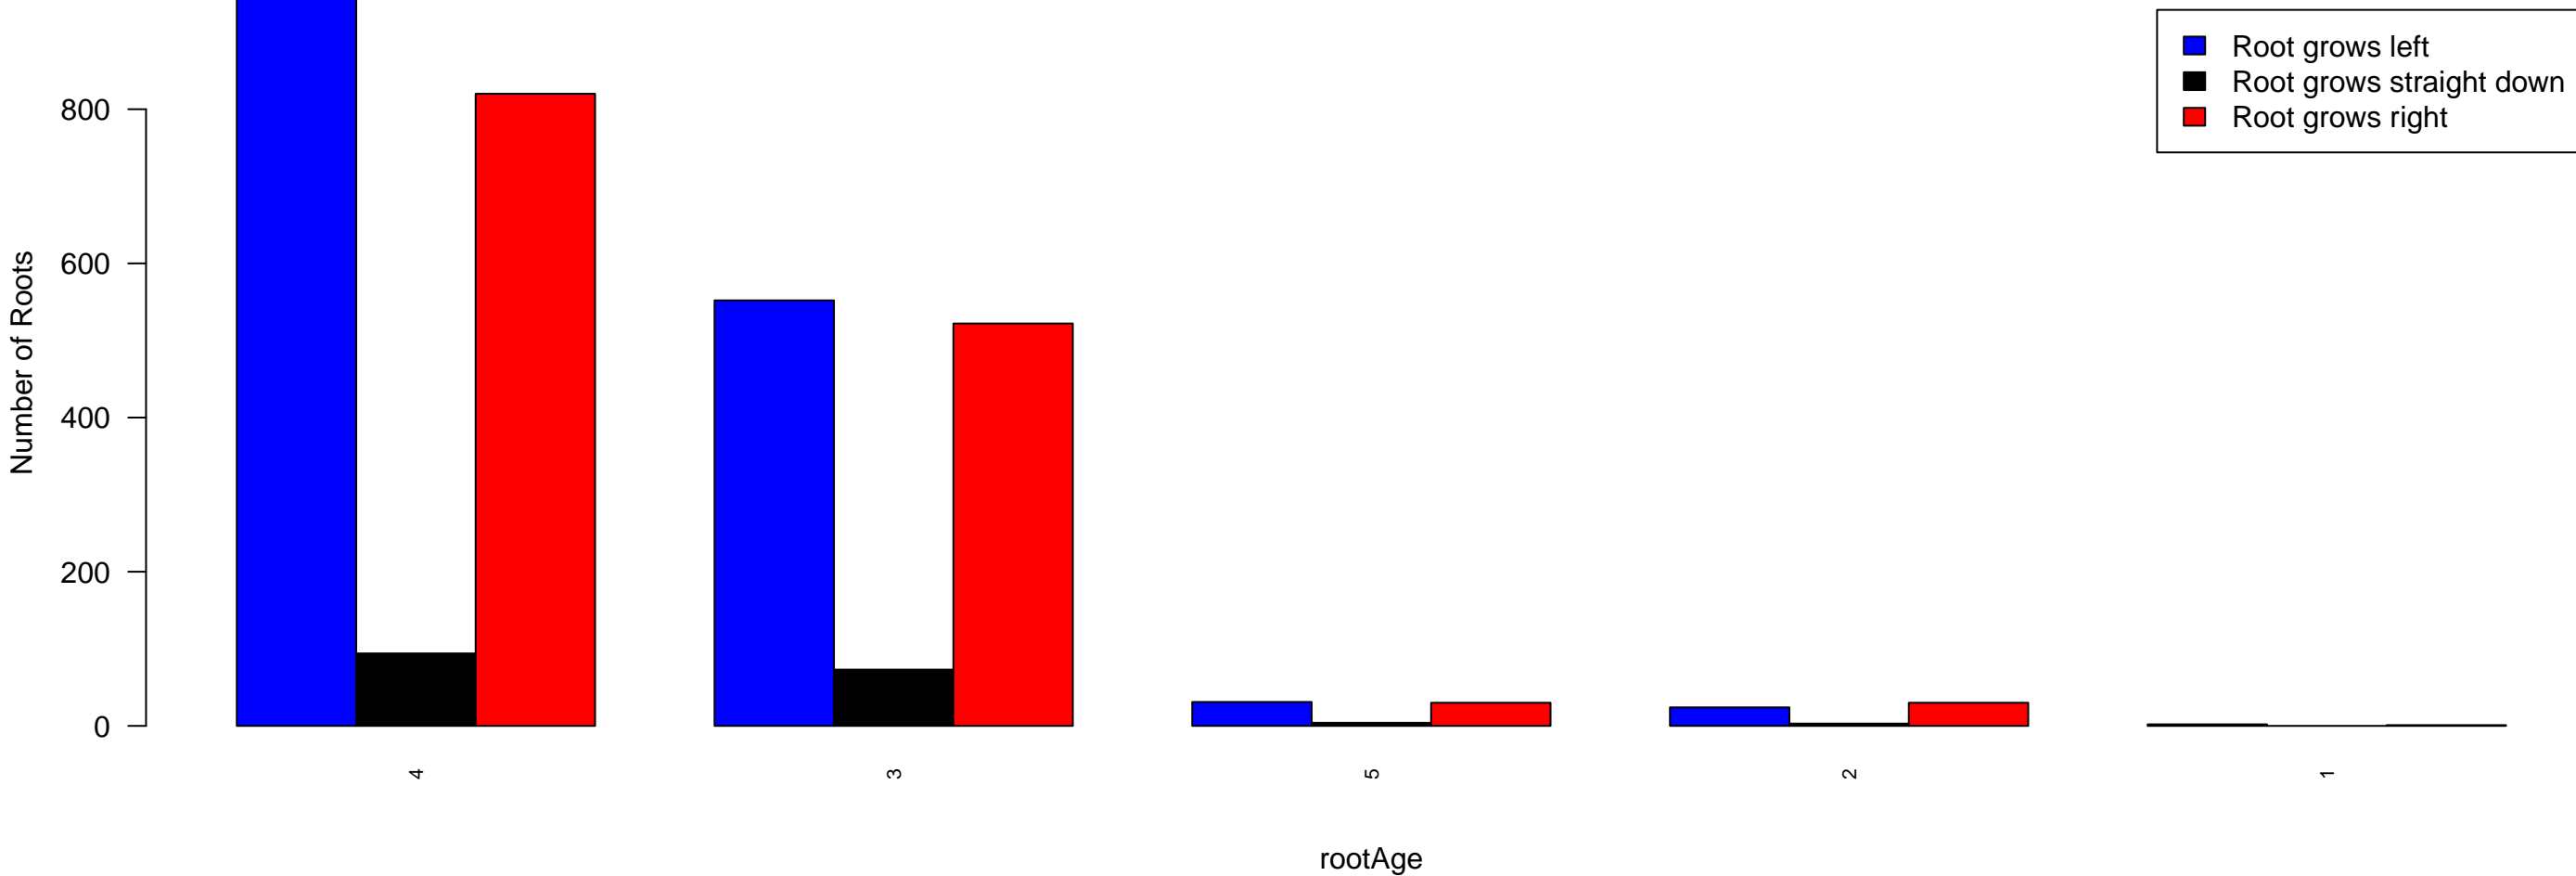

Trait: tipAngSign Co-variate: replicate

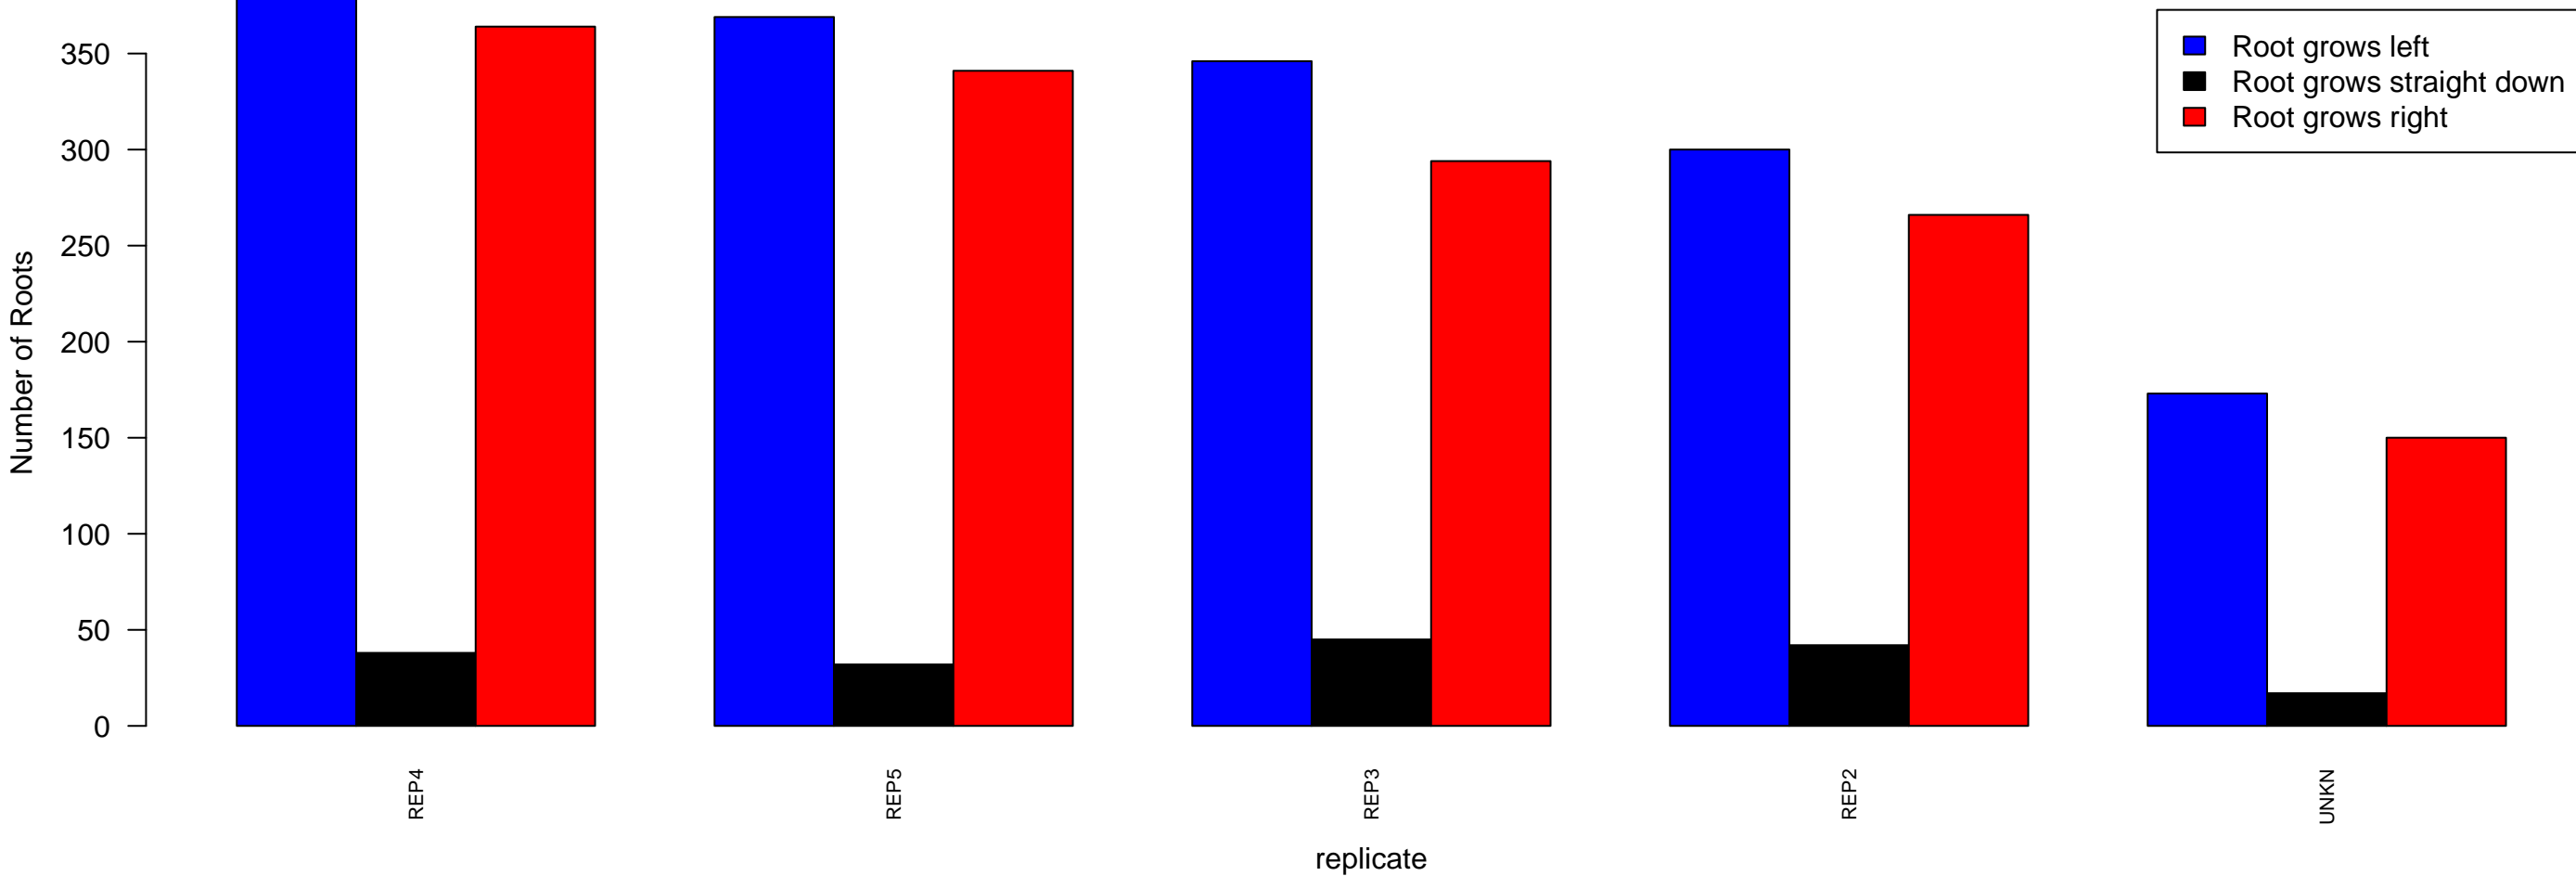

Trait: tipAngSign Co-variate: collide

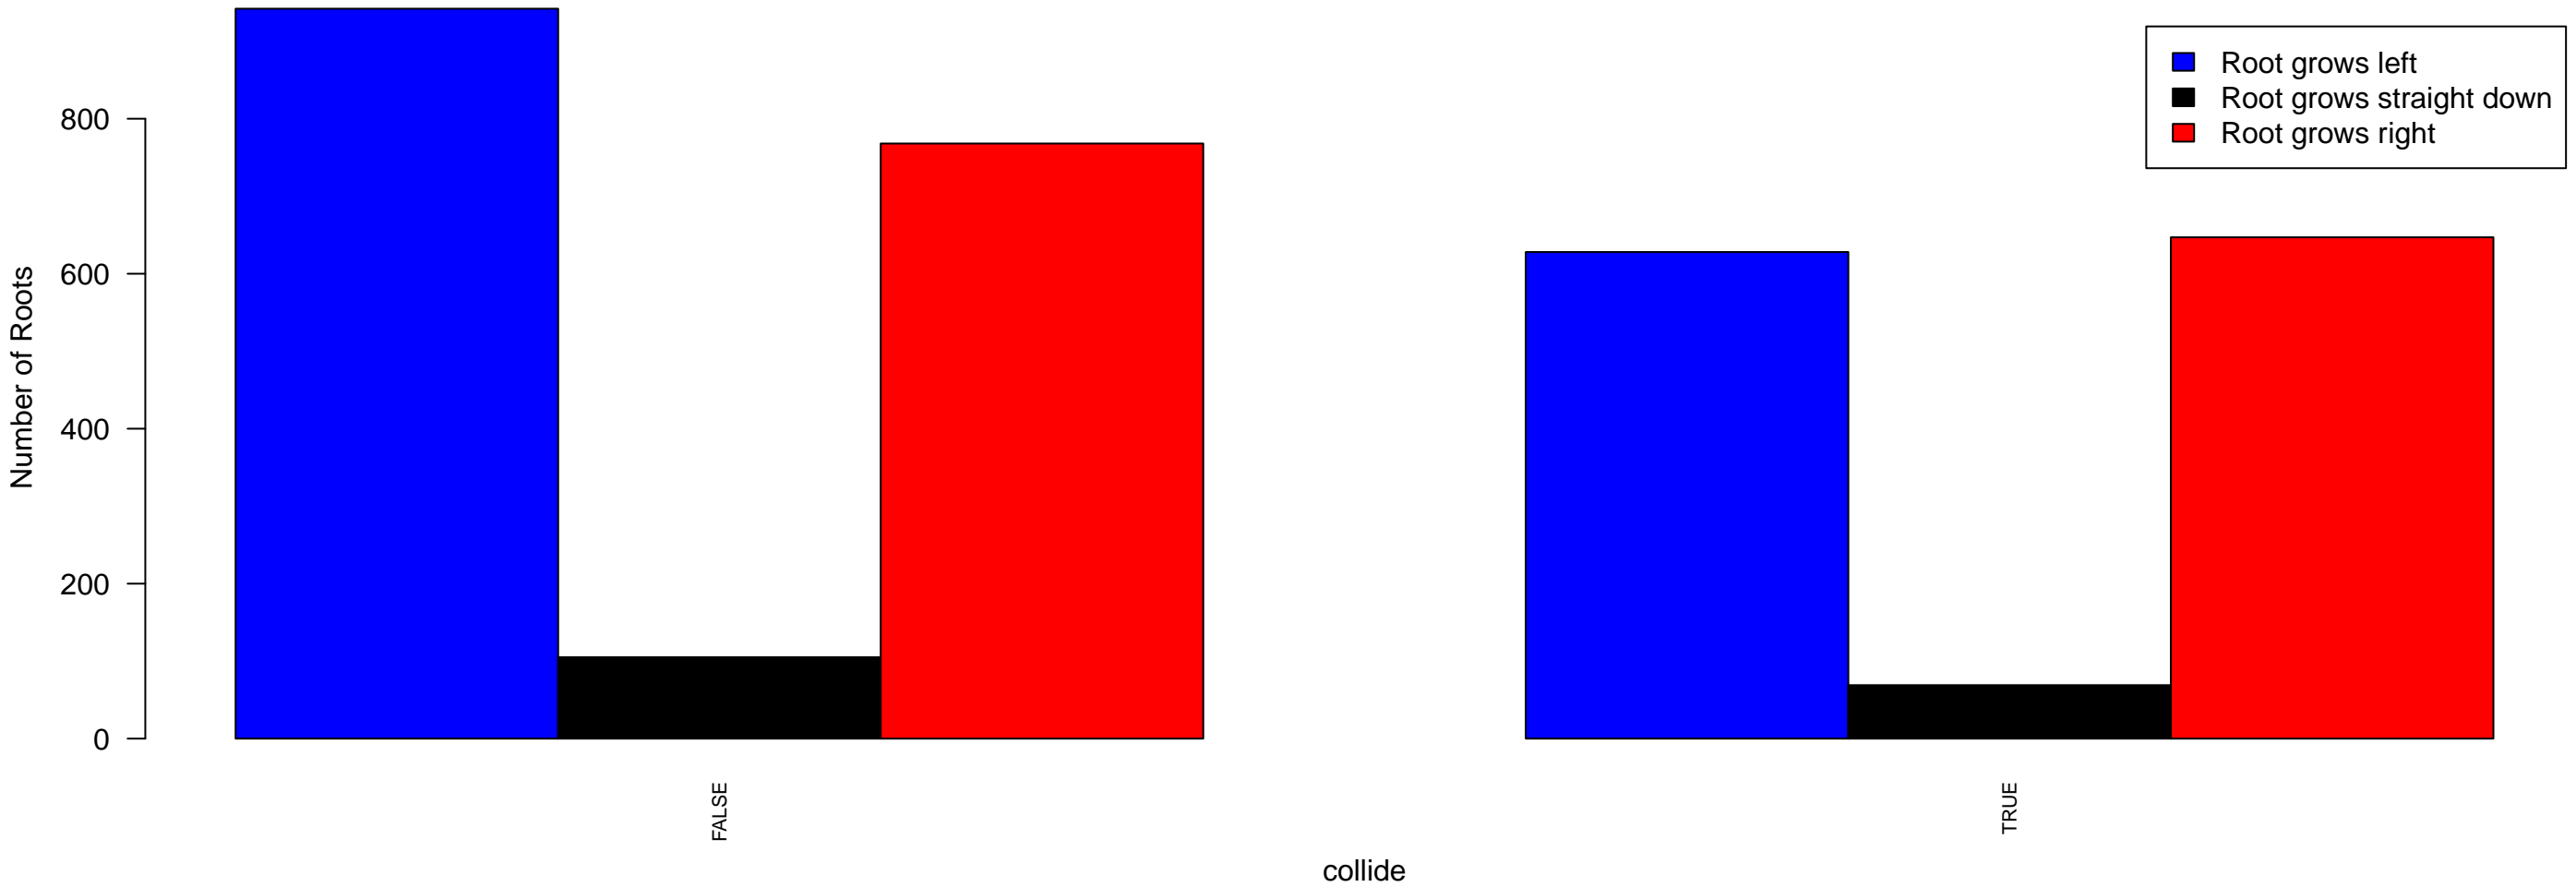

Trait: tipAngSign Co-variate: along

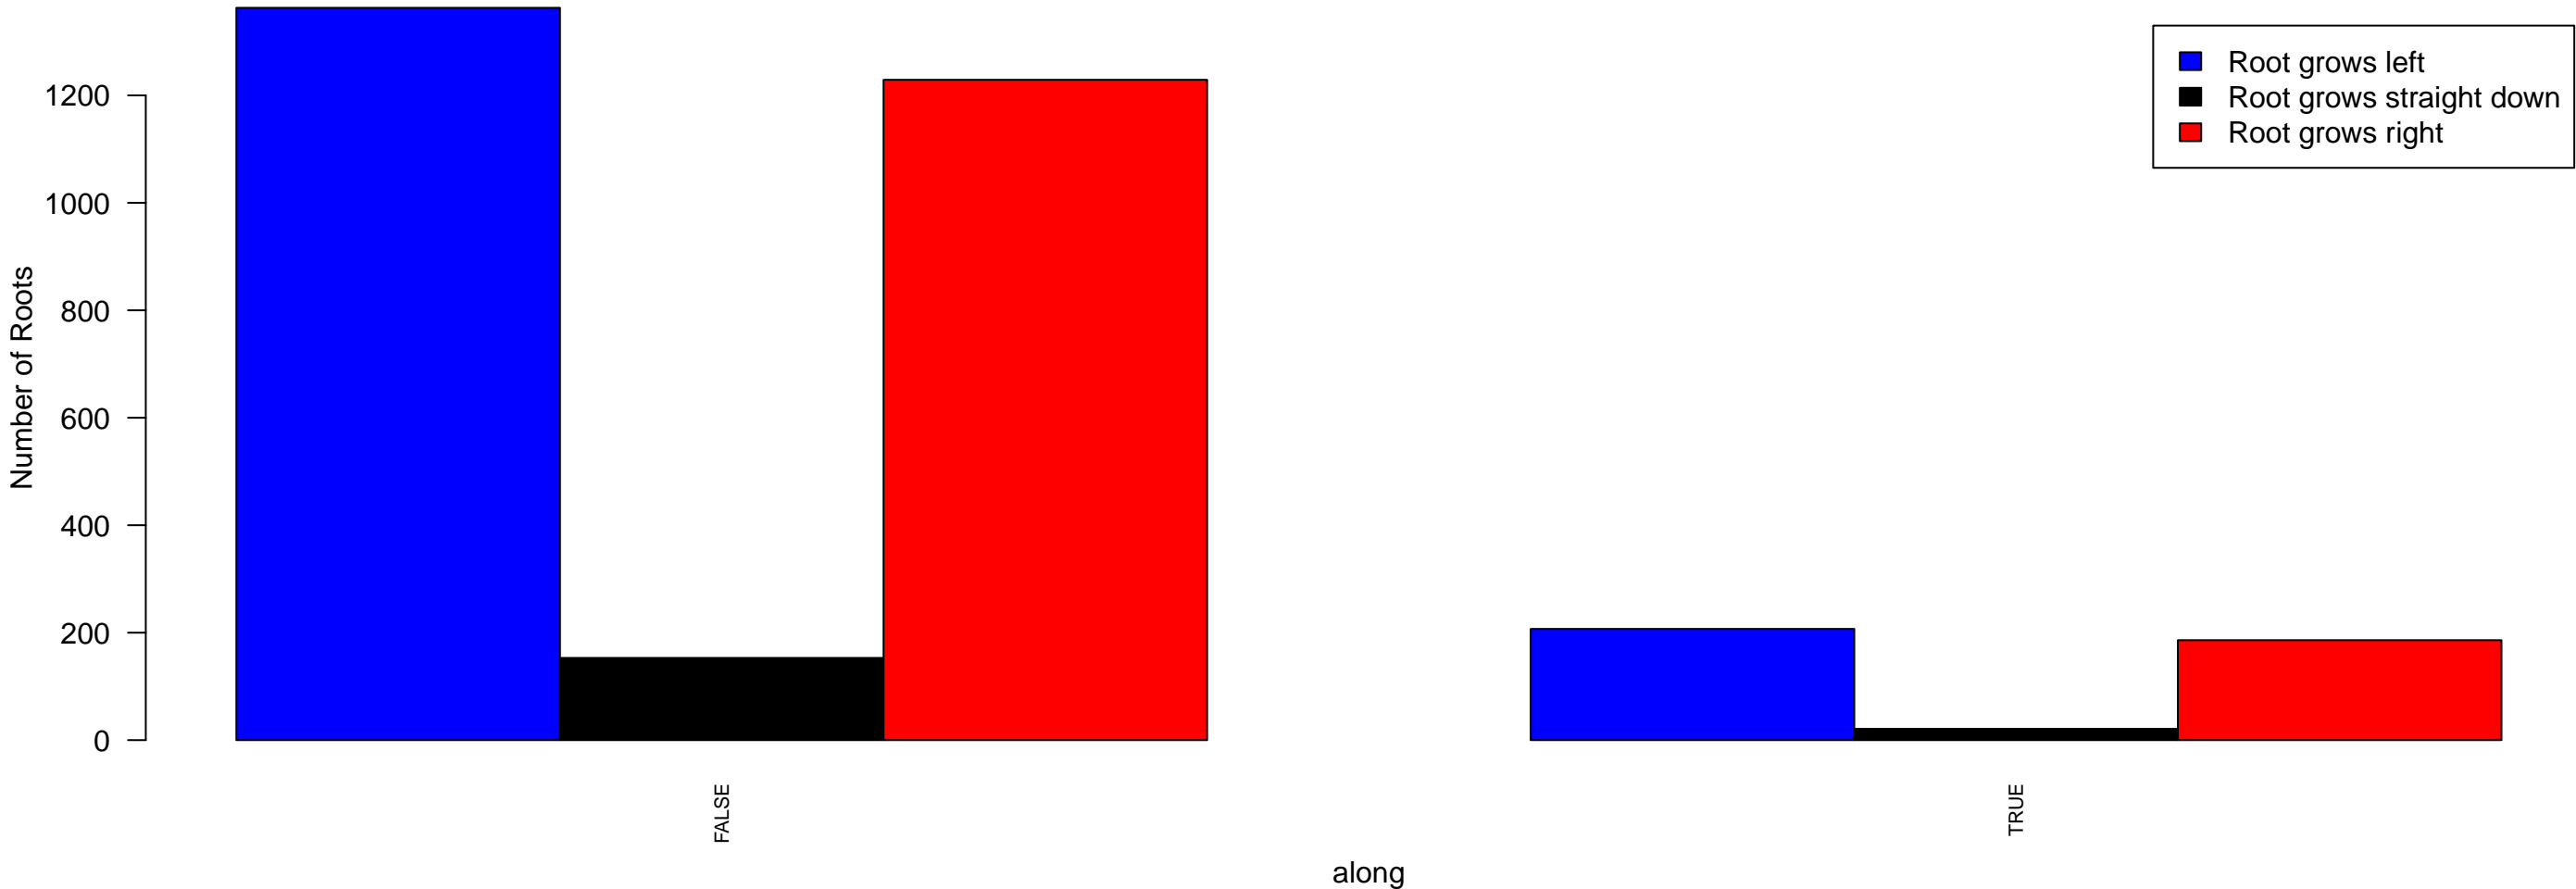

Trait: avgAngSign Co-variate: genotype

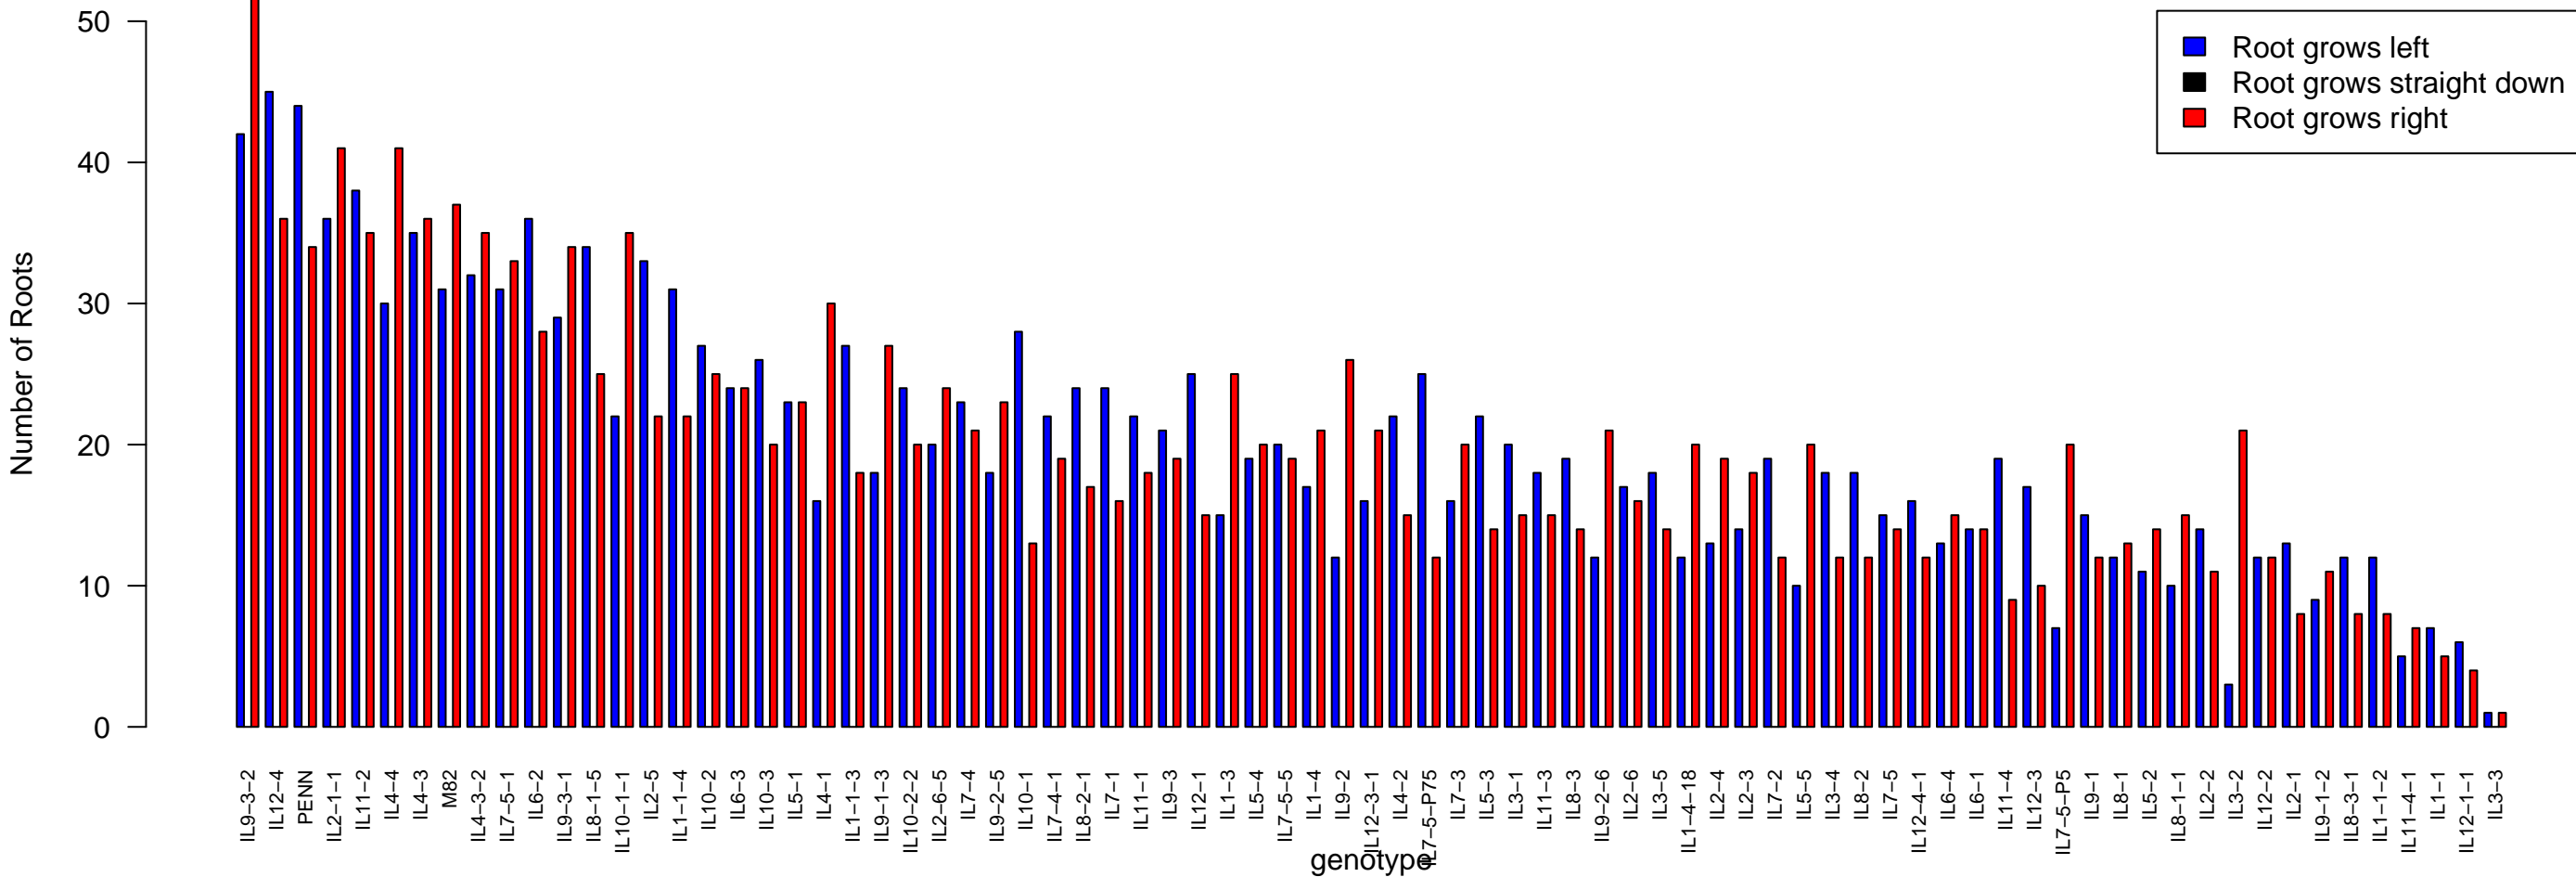

Trait: avgAngSign Co-variate: experiment

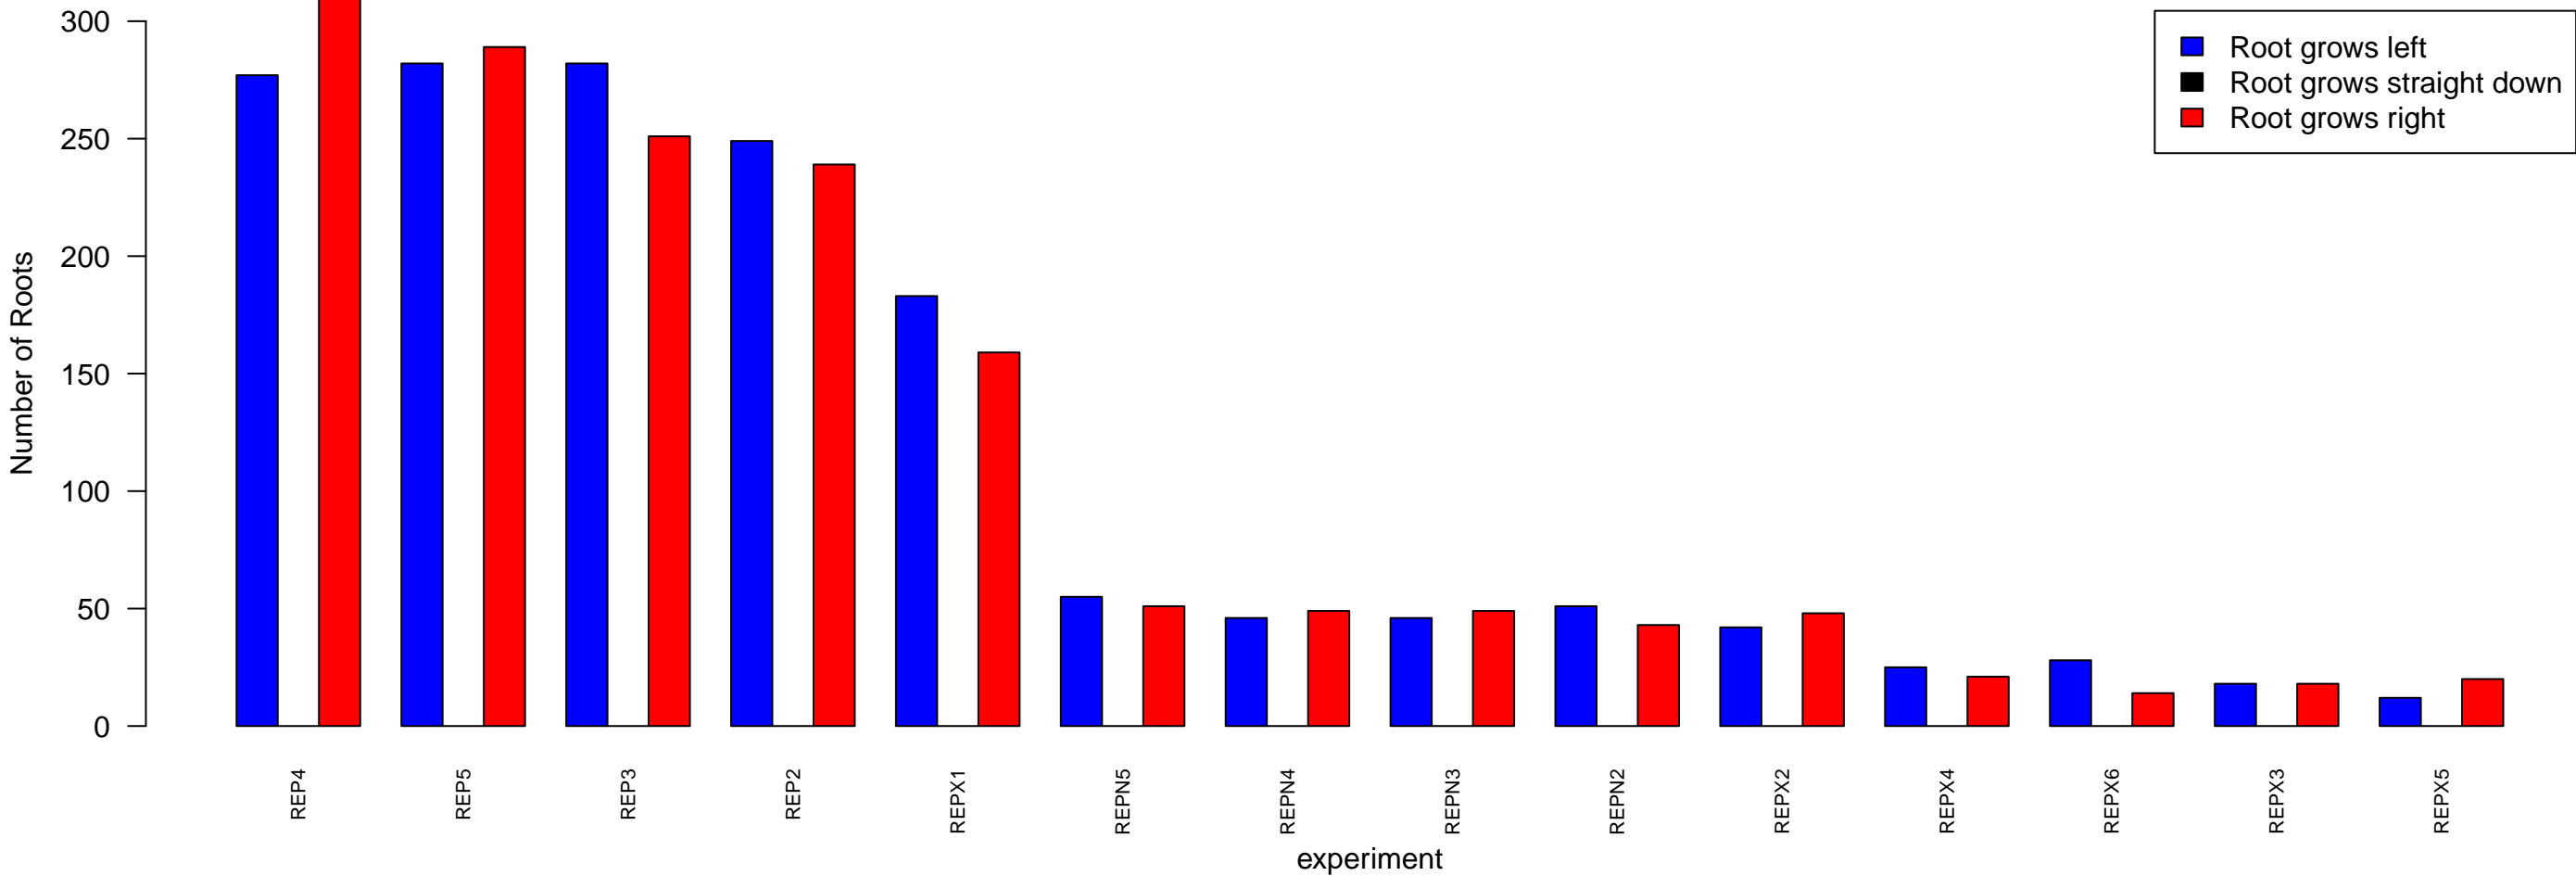

Trait: avgAngSign Co-variate: germAge

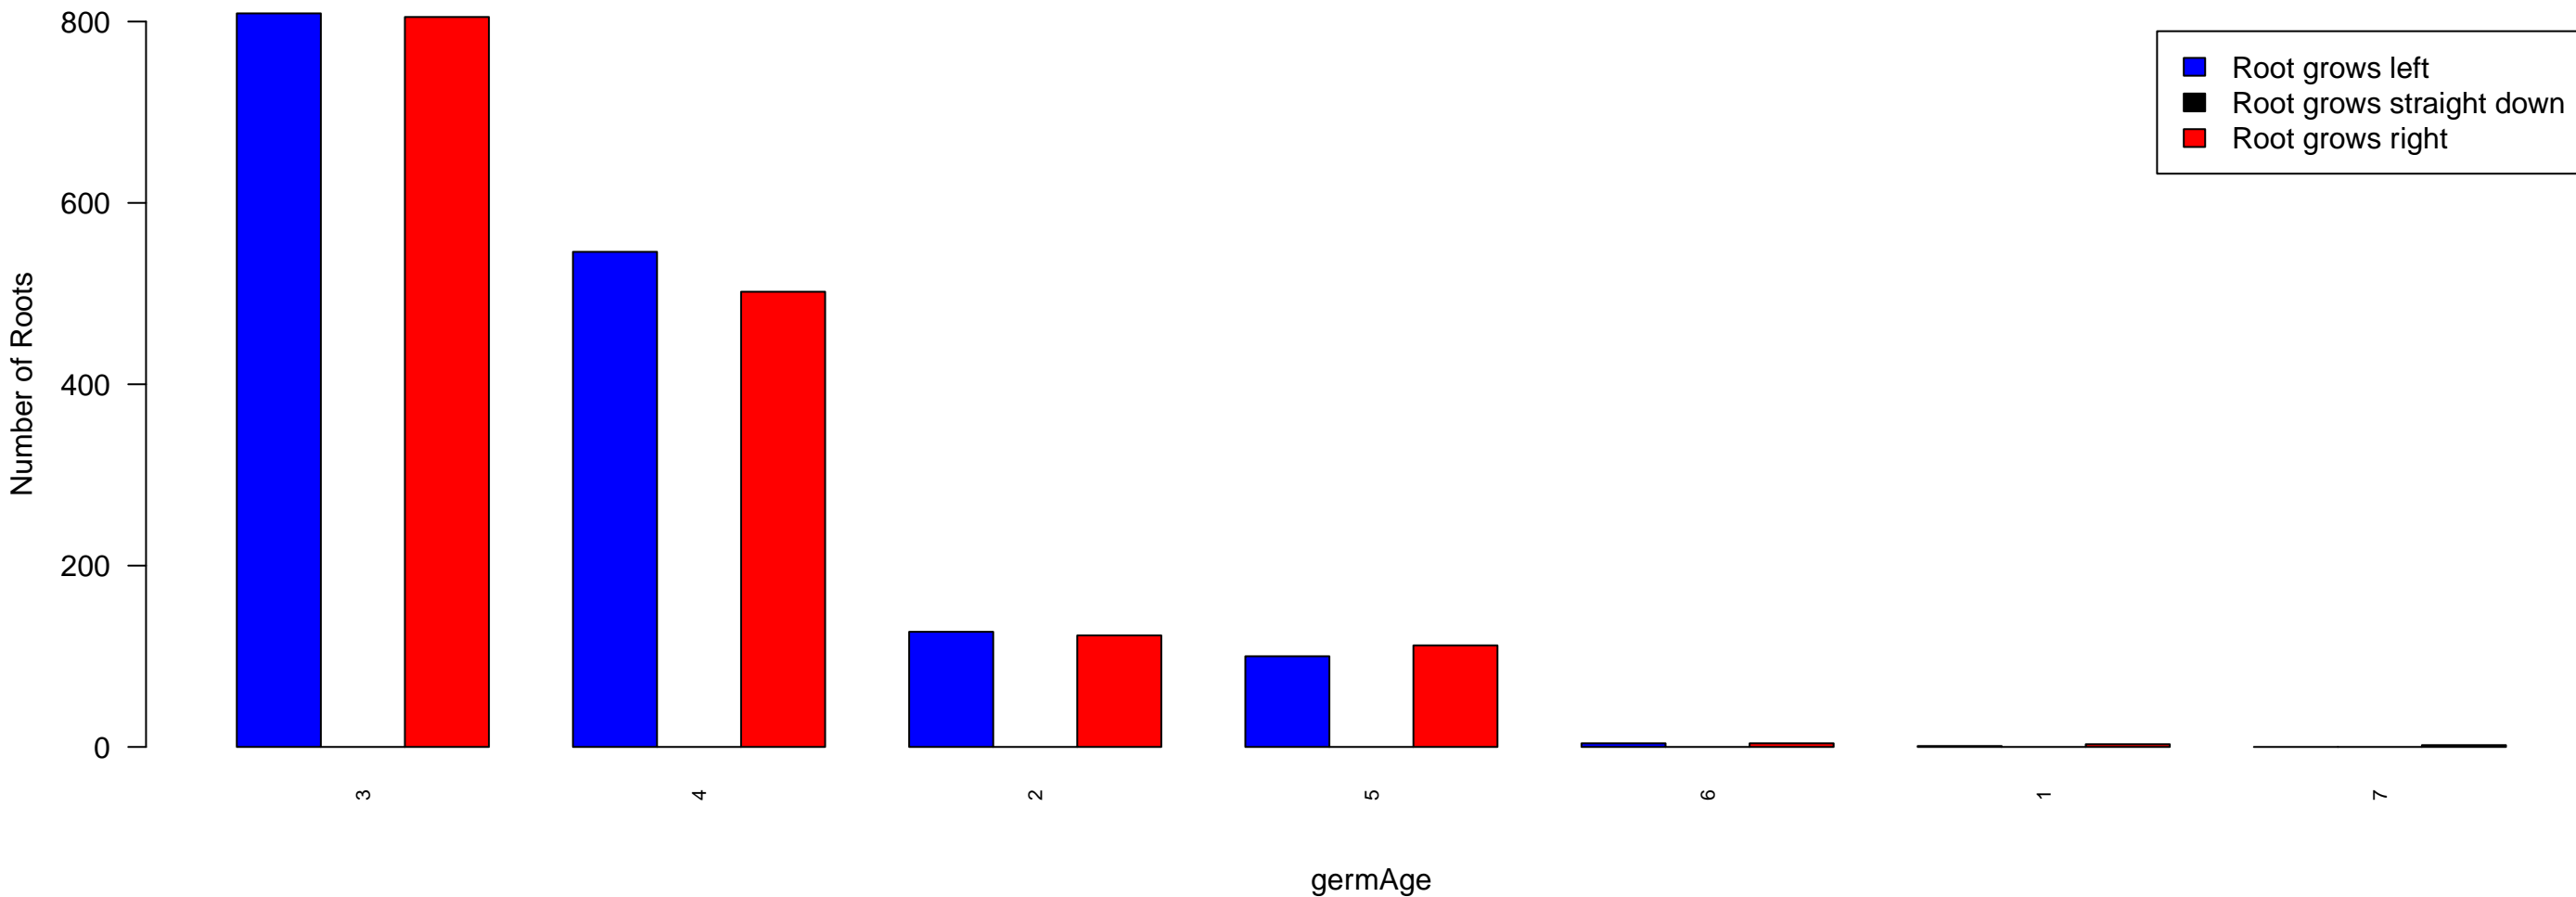

Trait: avgAngSign Co-variate: rootAge

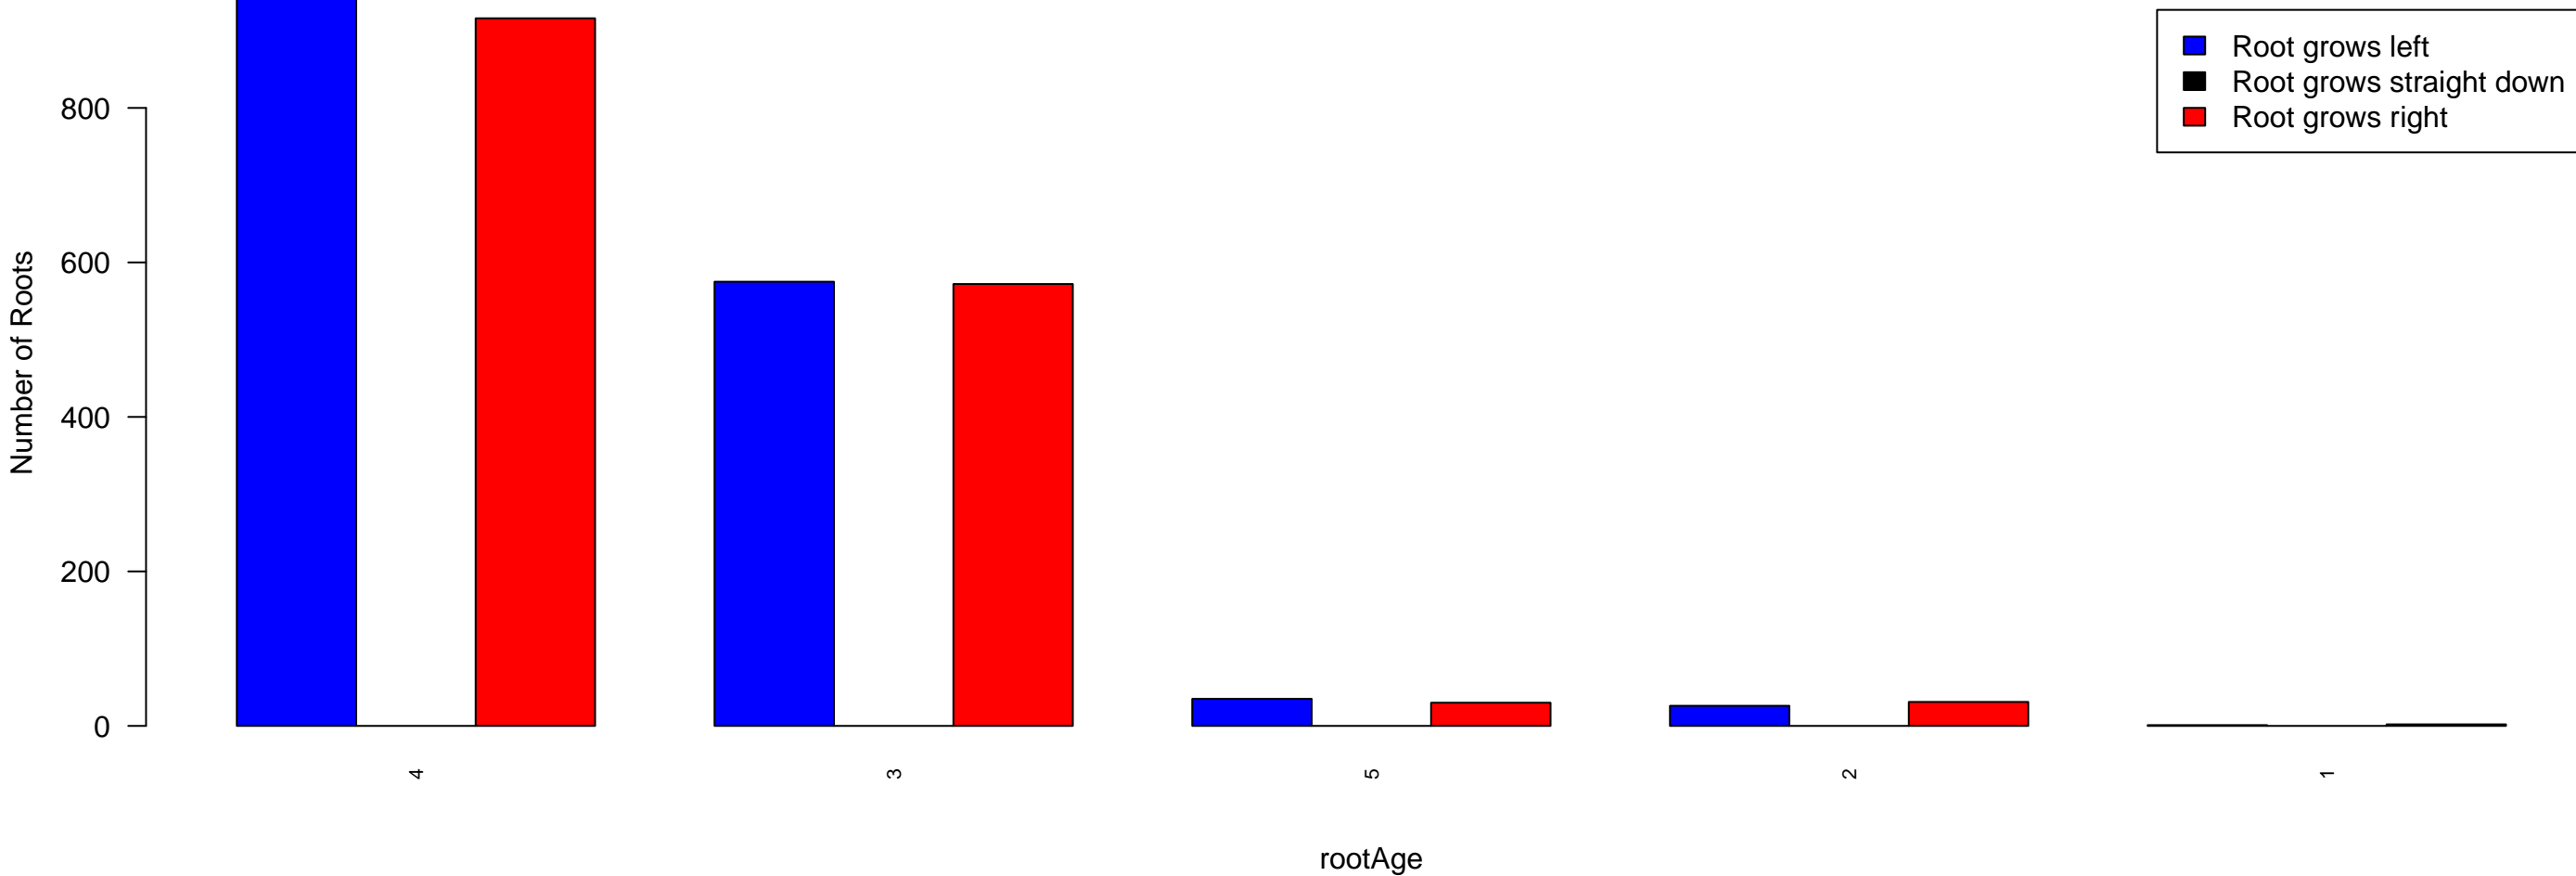

Trait: avgAngSign Co-variate: replicate

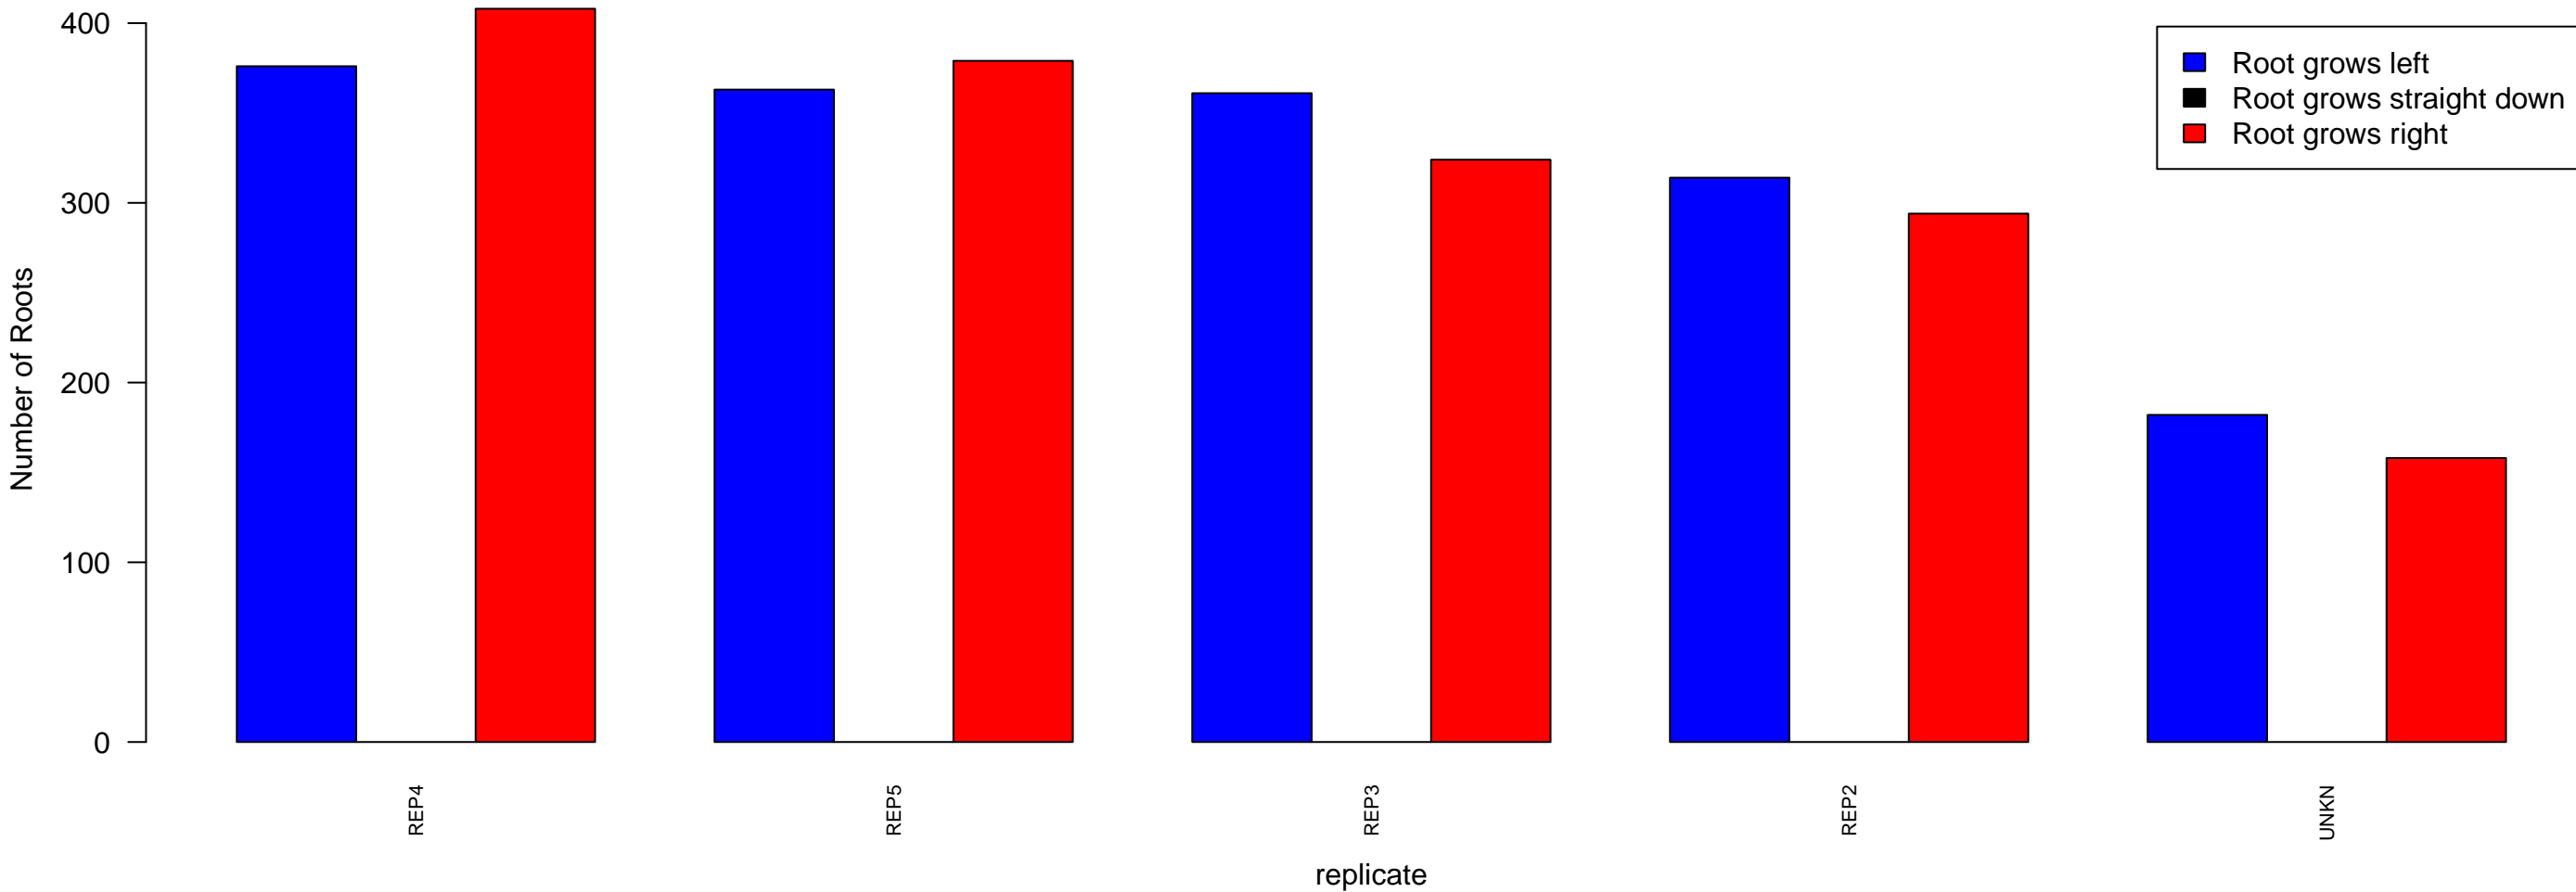

Trait: avgAngSign Co-variate: collide

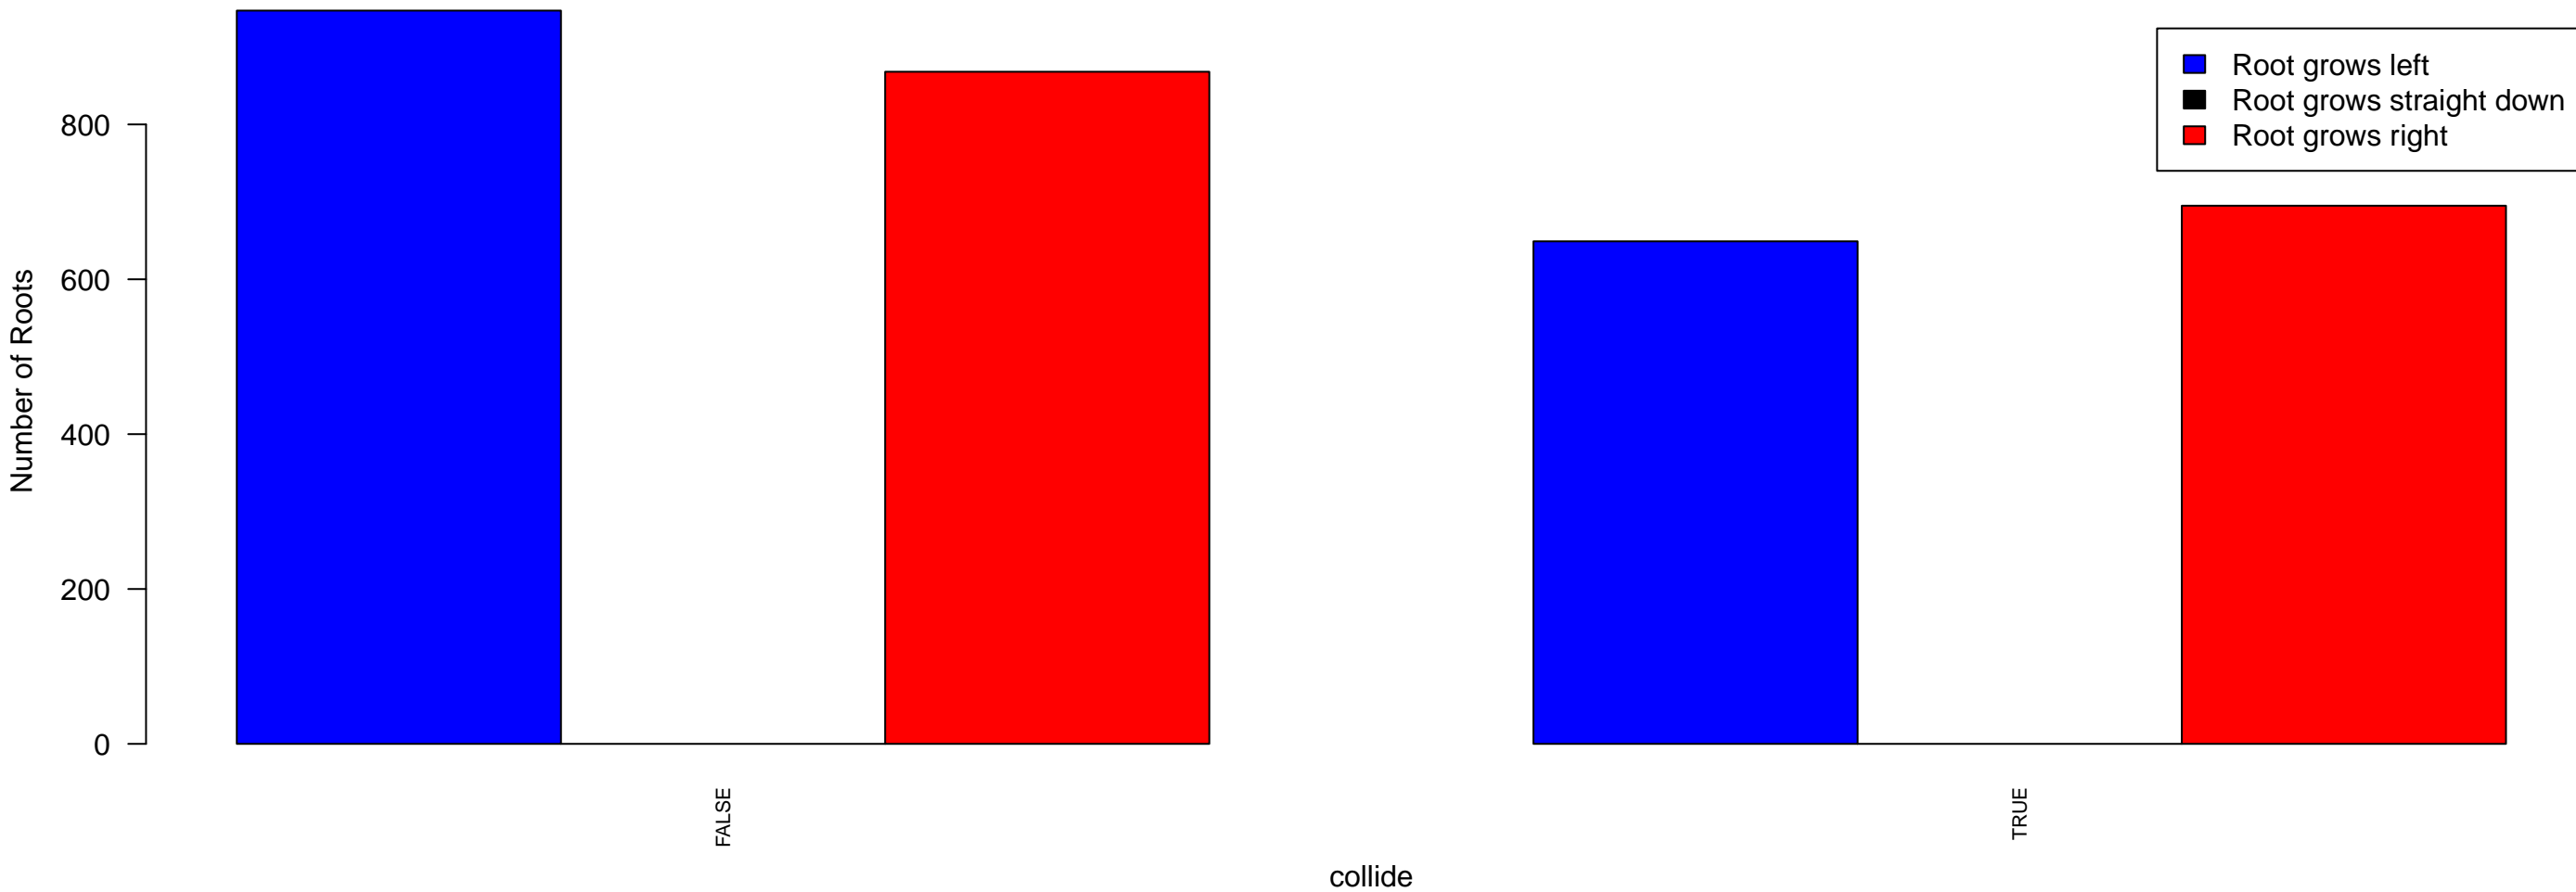

Trait: avgAngSign Co-variate: along

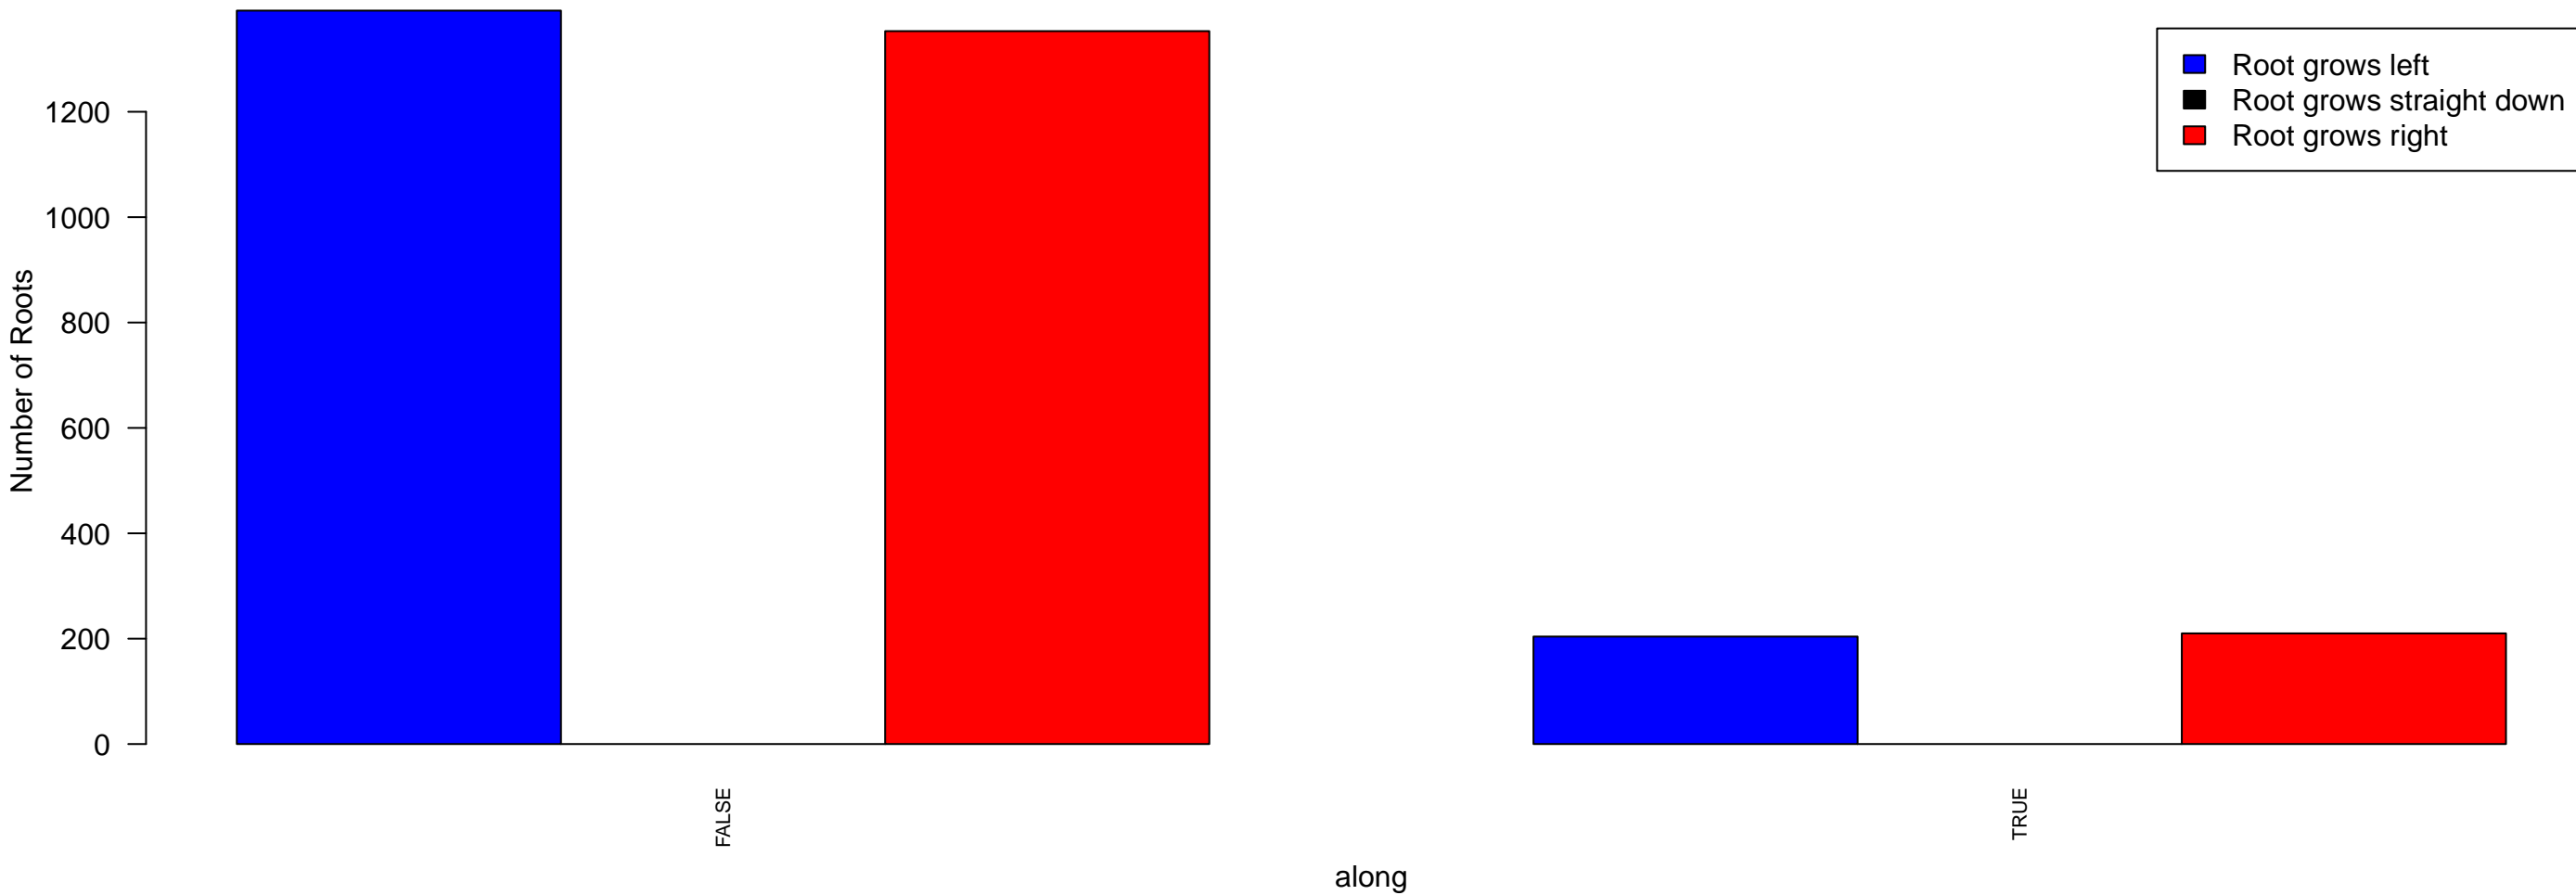

Trait: first3rdAngSign Co-variate: genotype

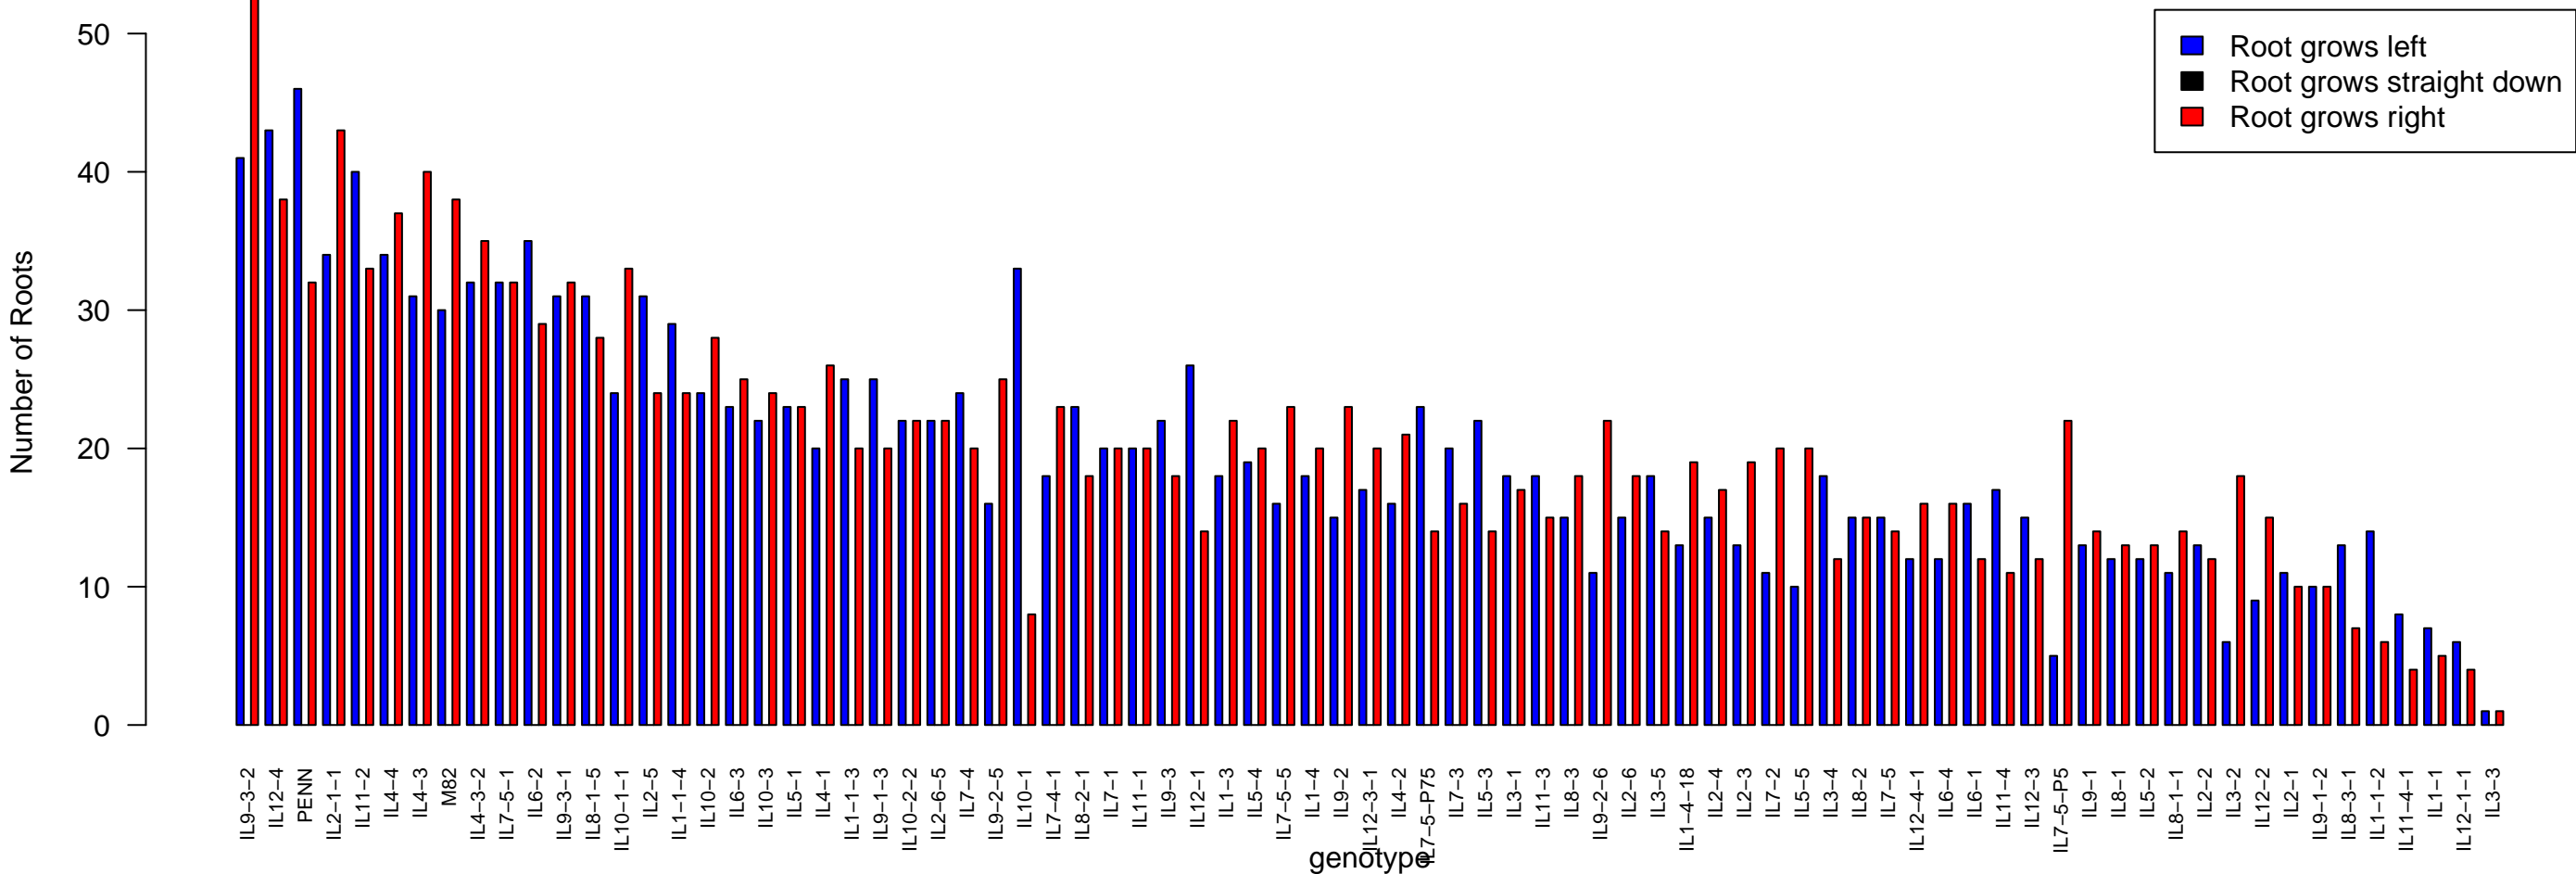

Trait: first3rdAngSign Co-variate: experiment

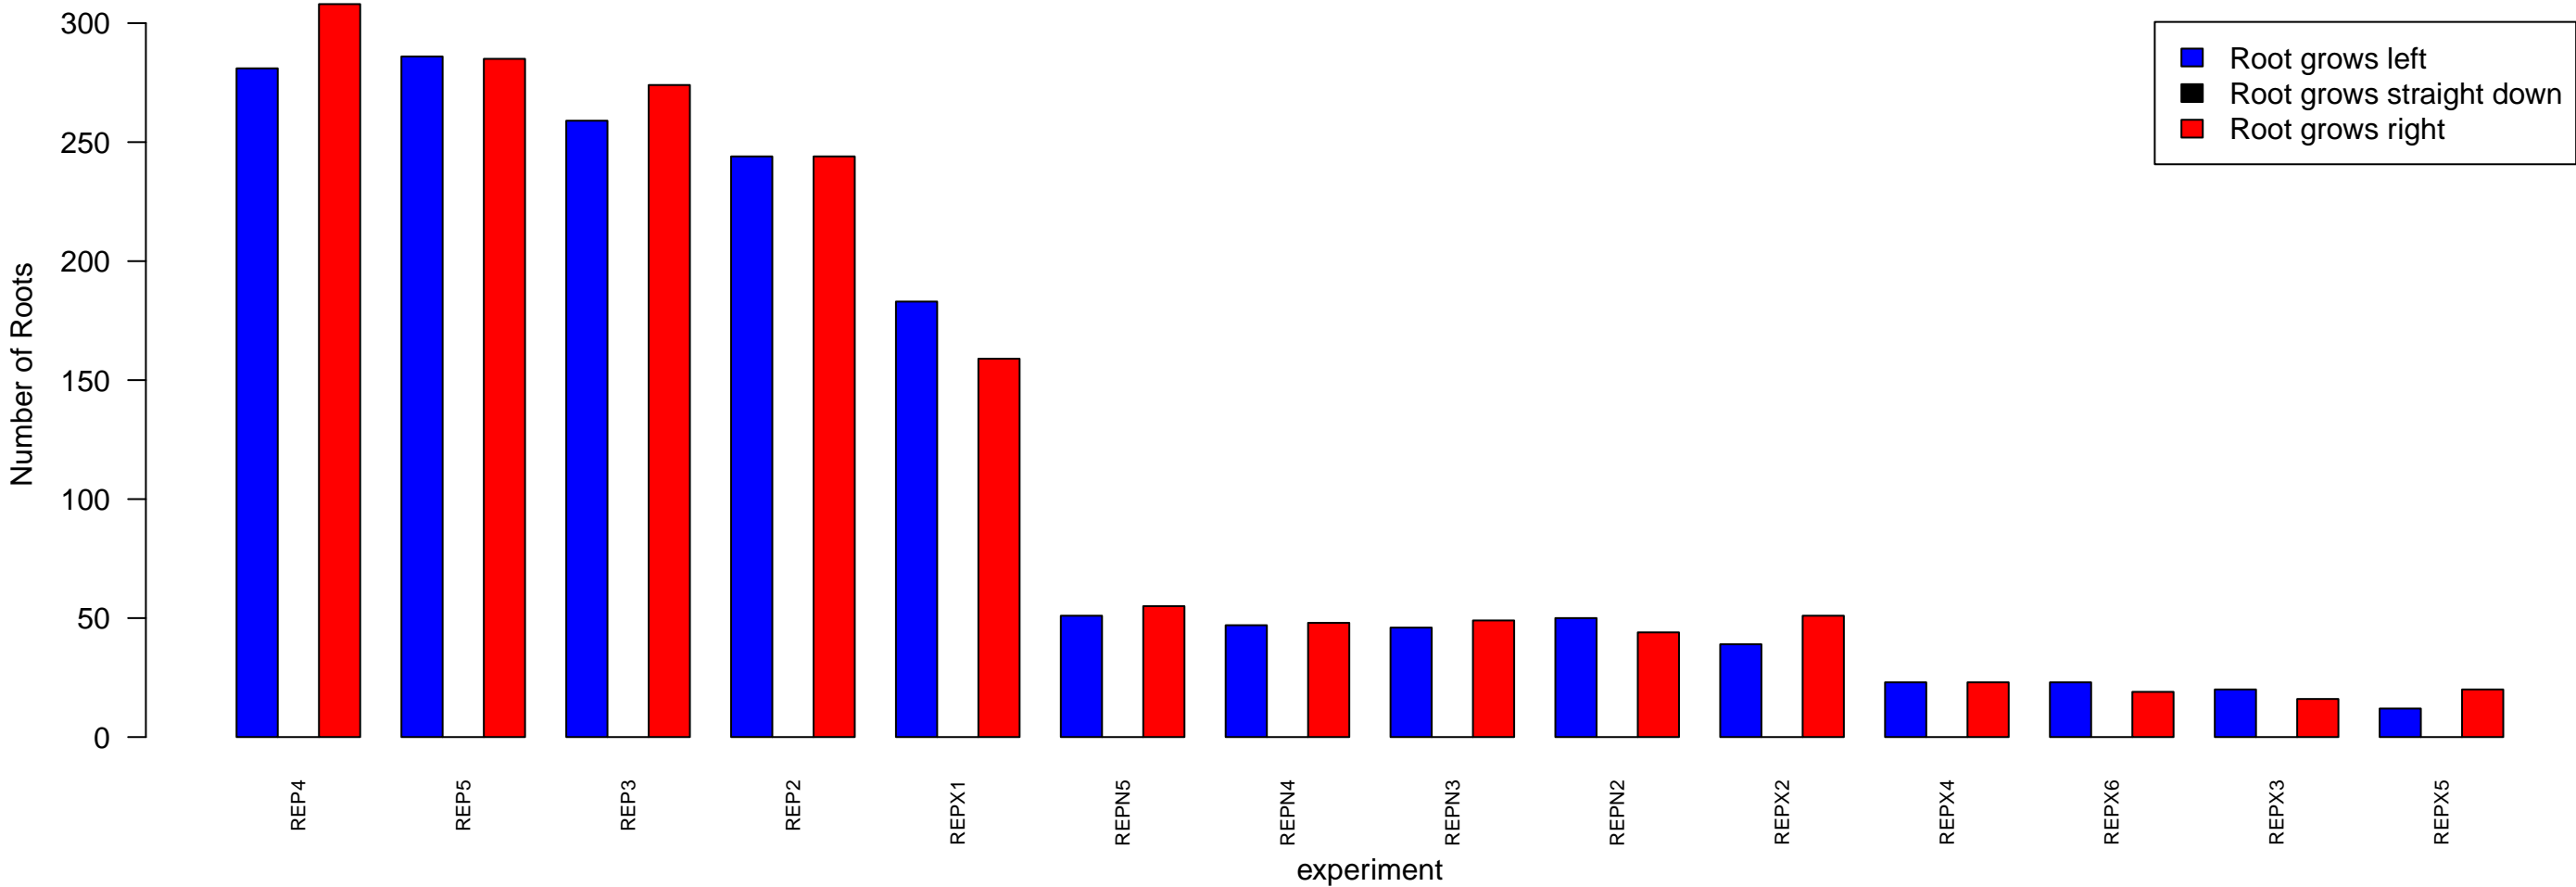

Trait: first3rdAngSign Co-variate: germAge

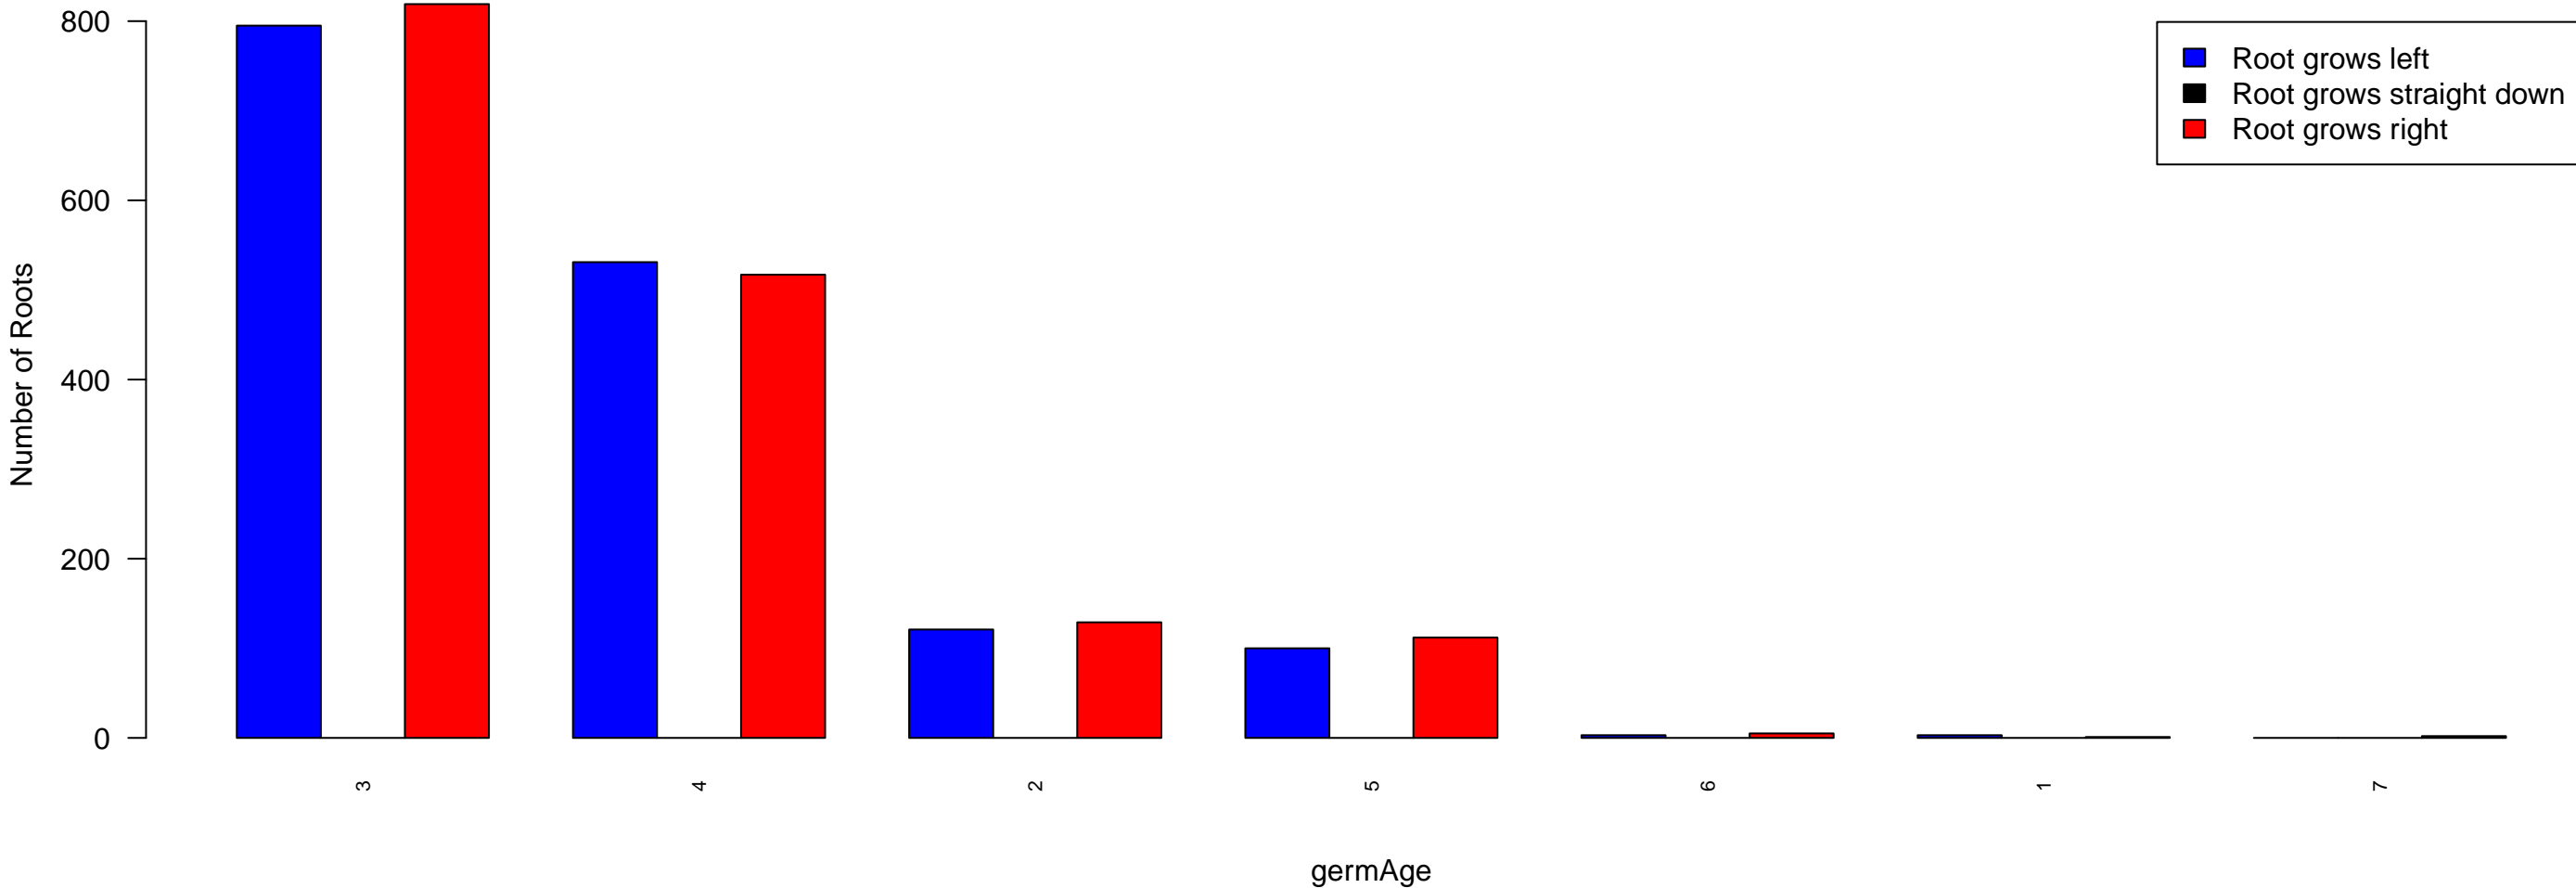

Trait: first3rdAngSign Co-variate: rootAge

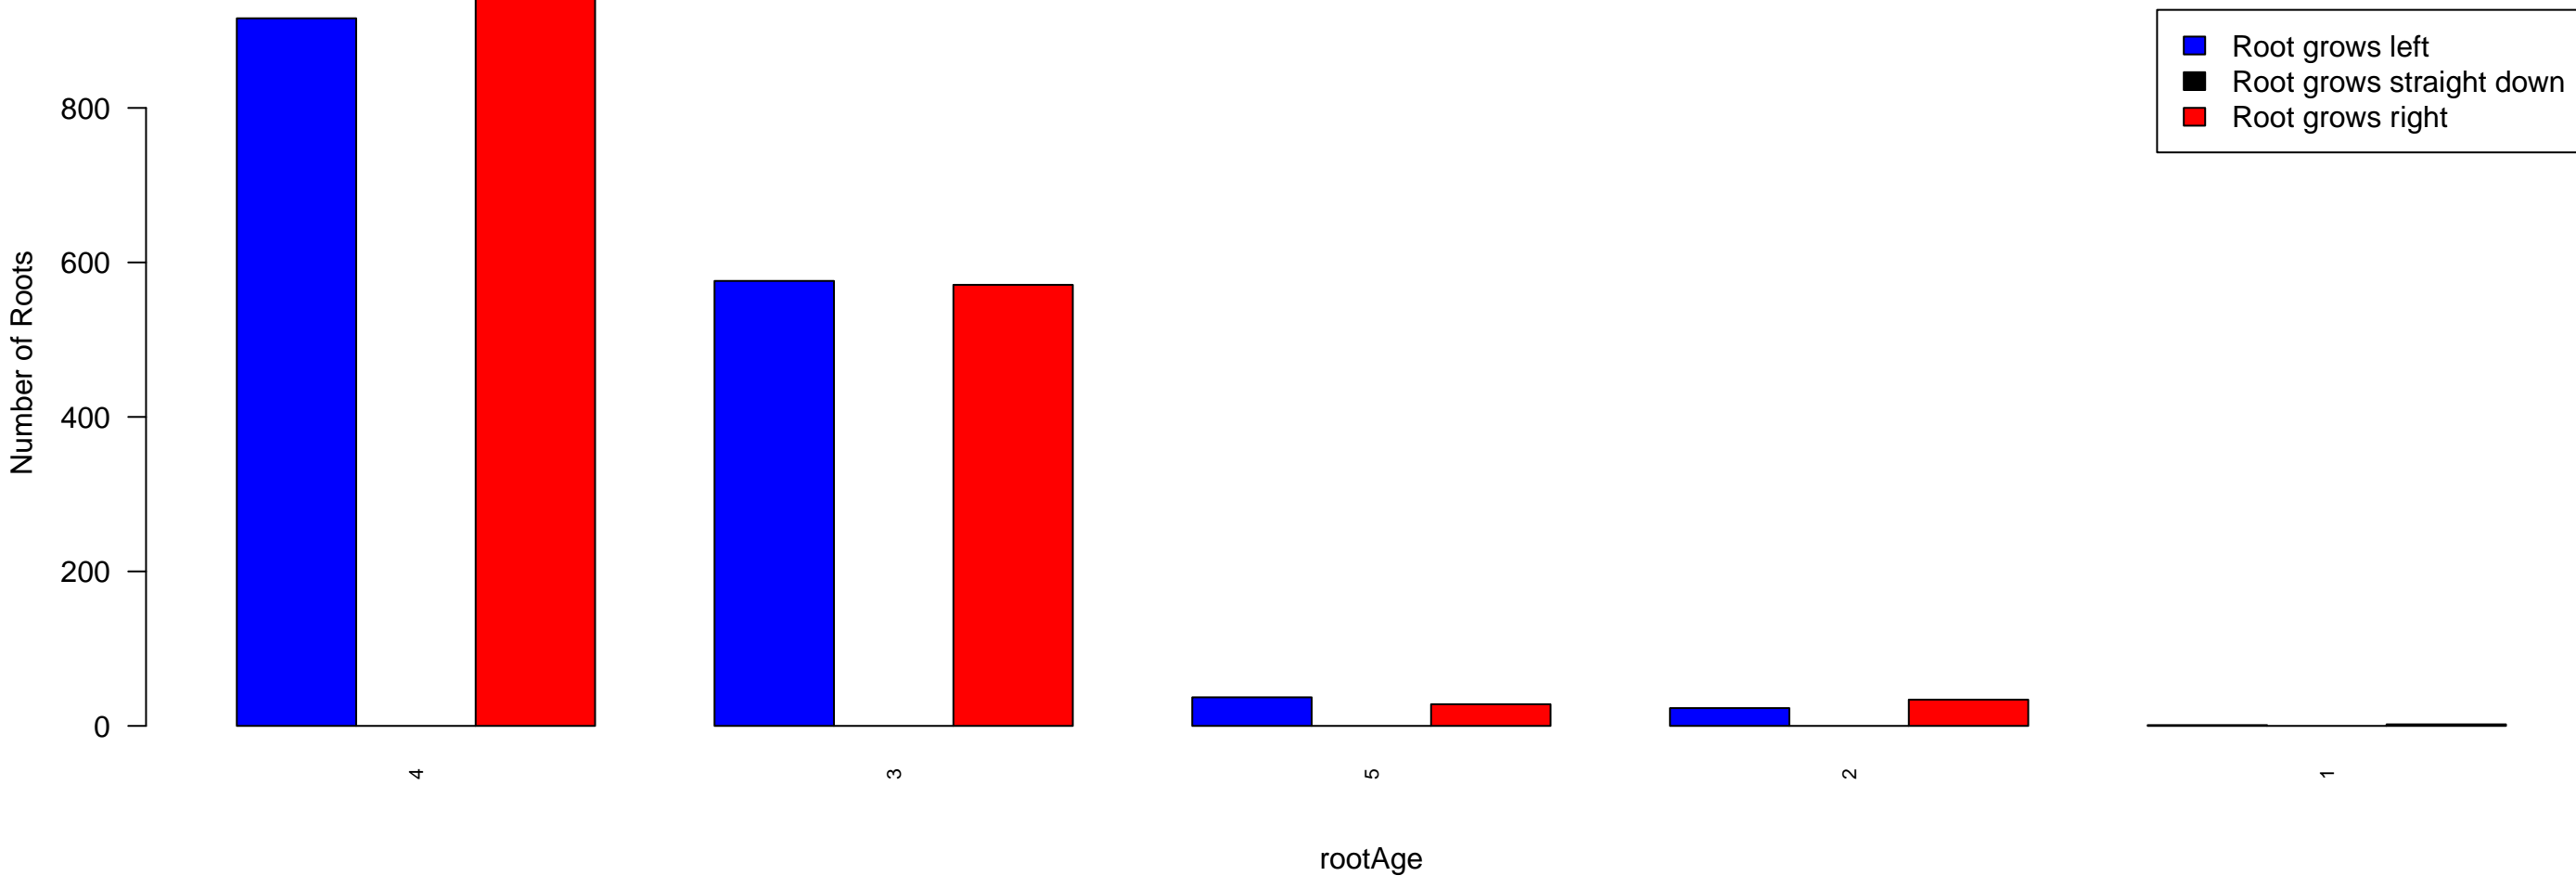

Trait: first3rdAngSign Co-variate: replicate

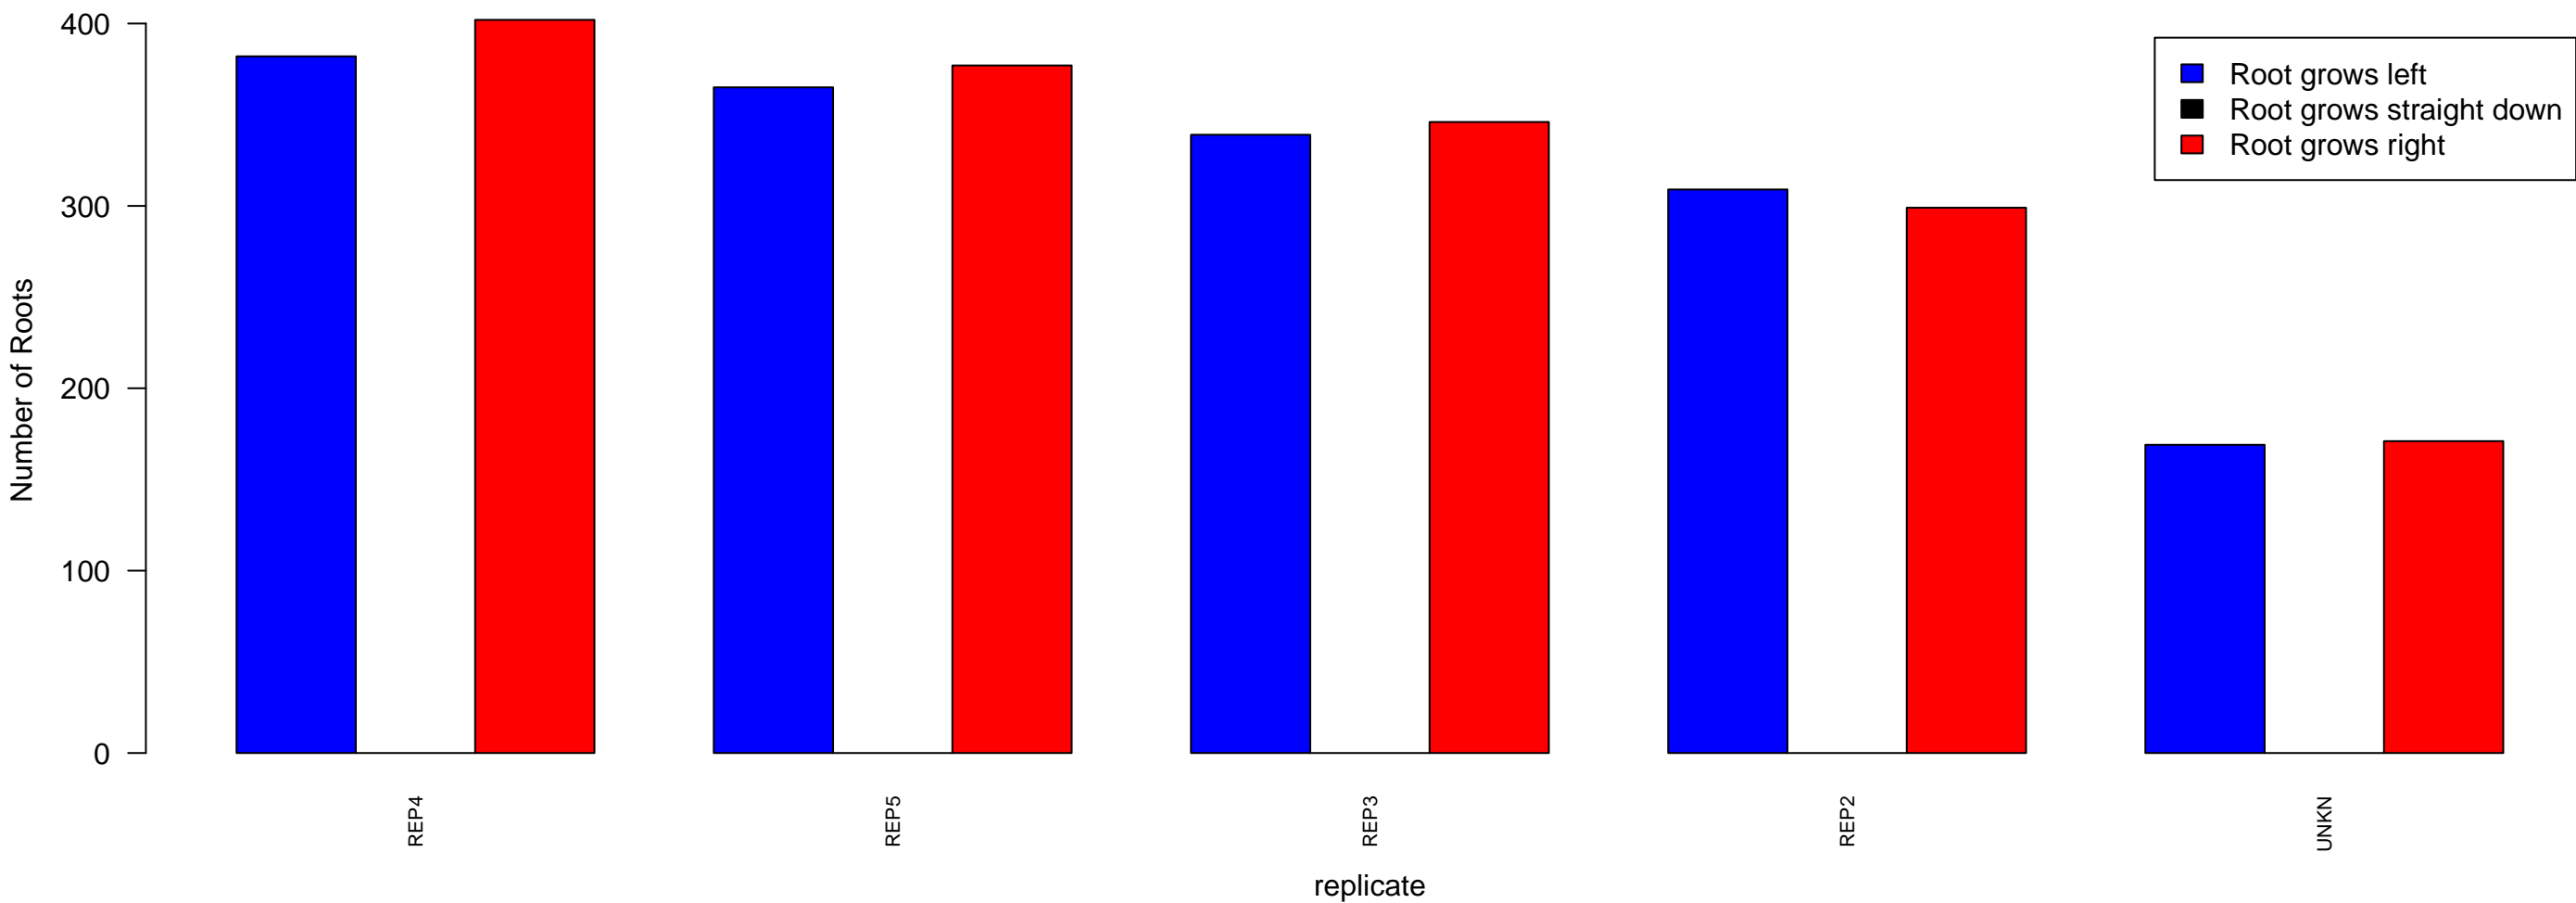

Trait: first3rdAngSign Co-variate: collide

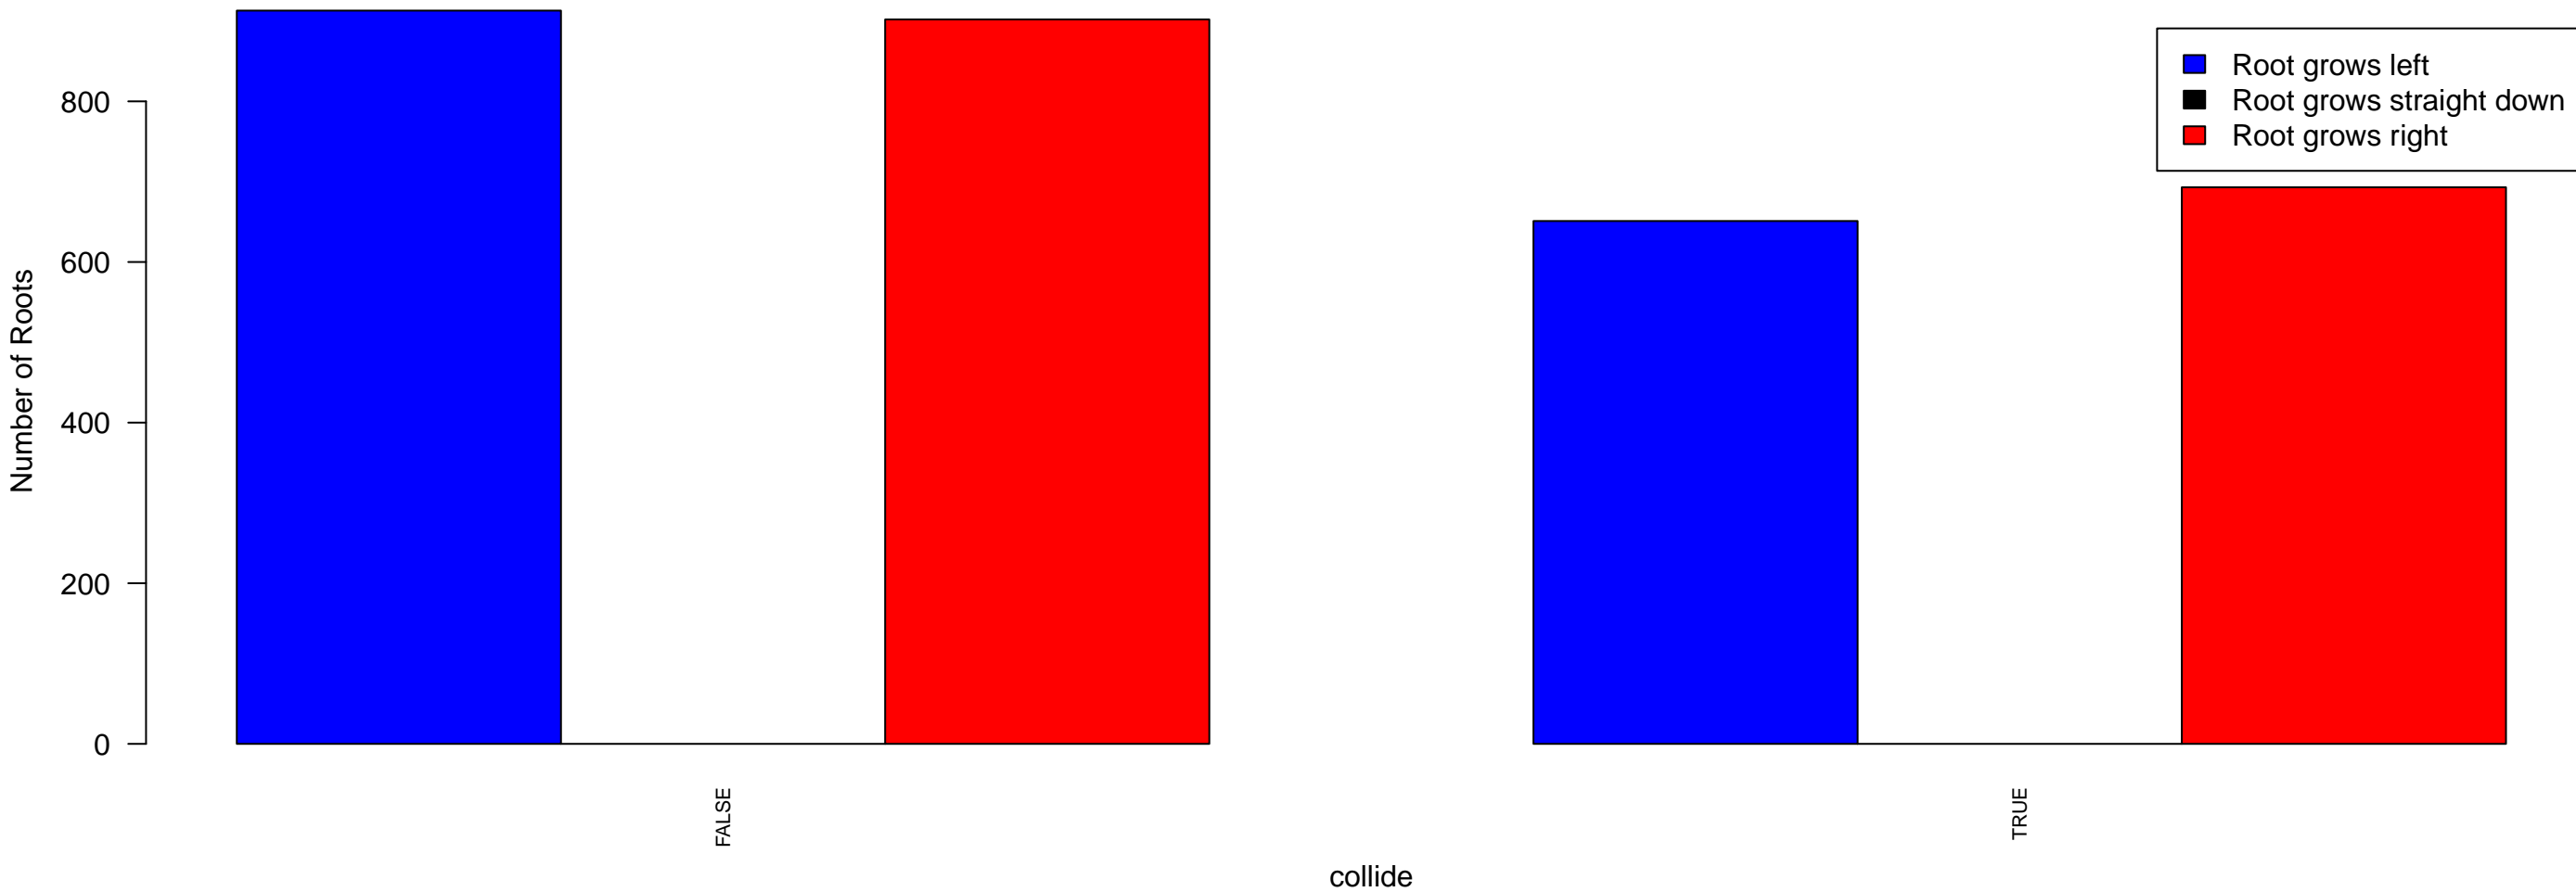

Trait: first3rdAngSign Co-variate: along

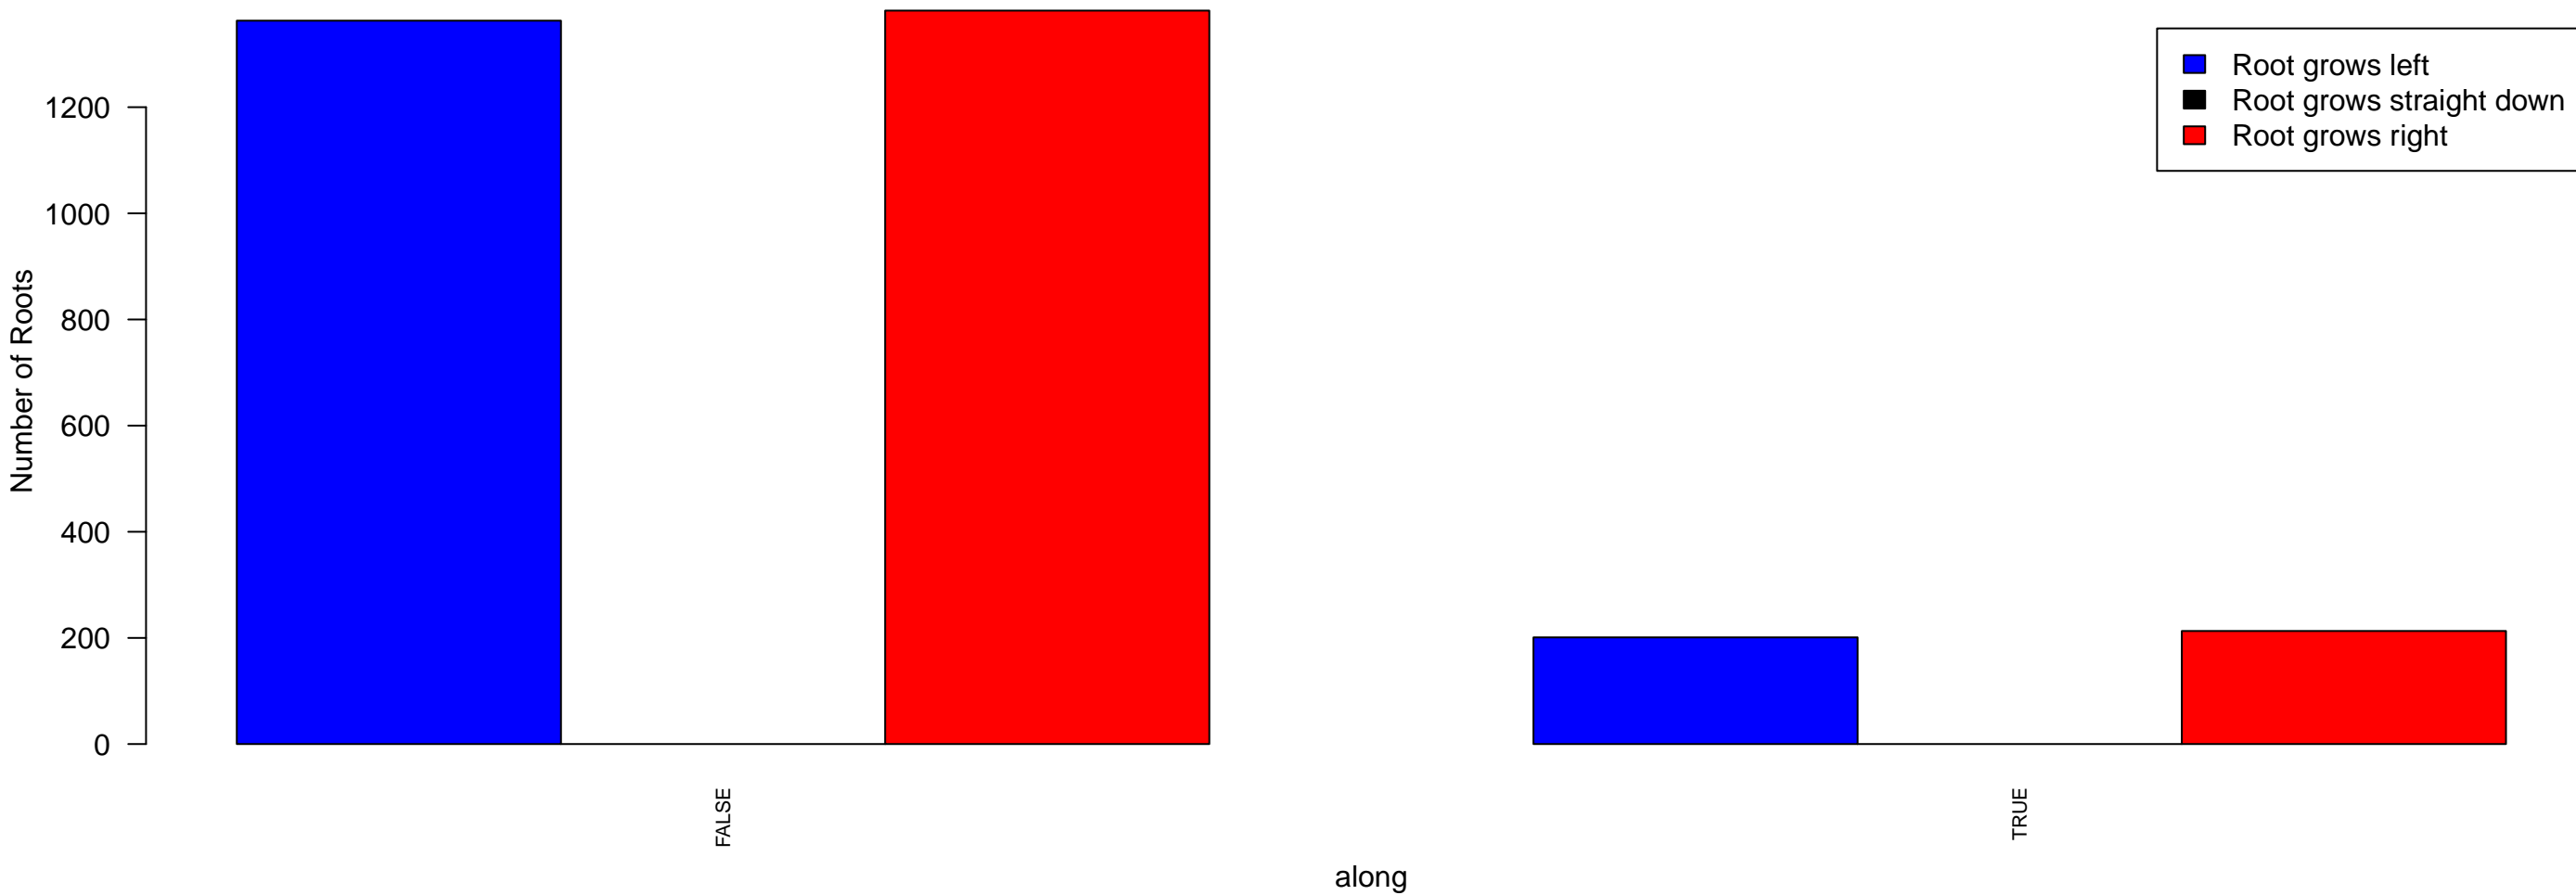

Trait: mid3rdAngSign Co-variate: genotype

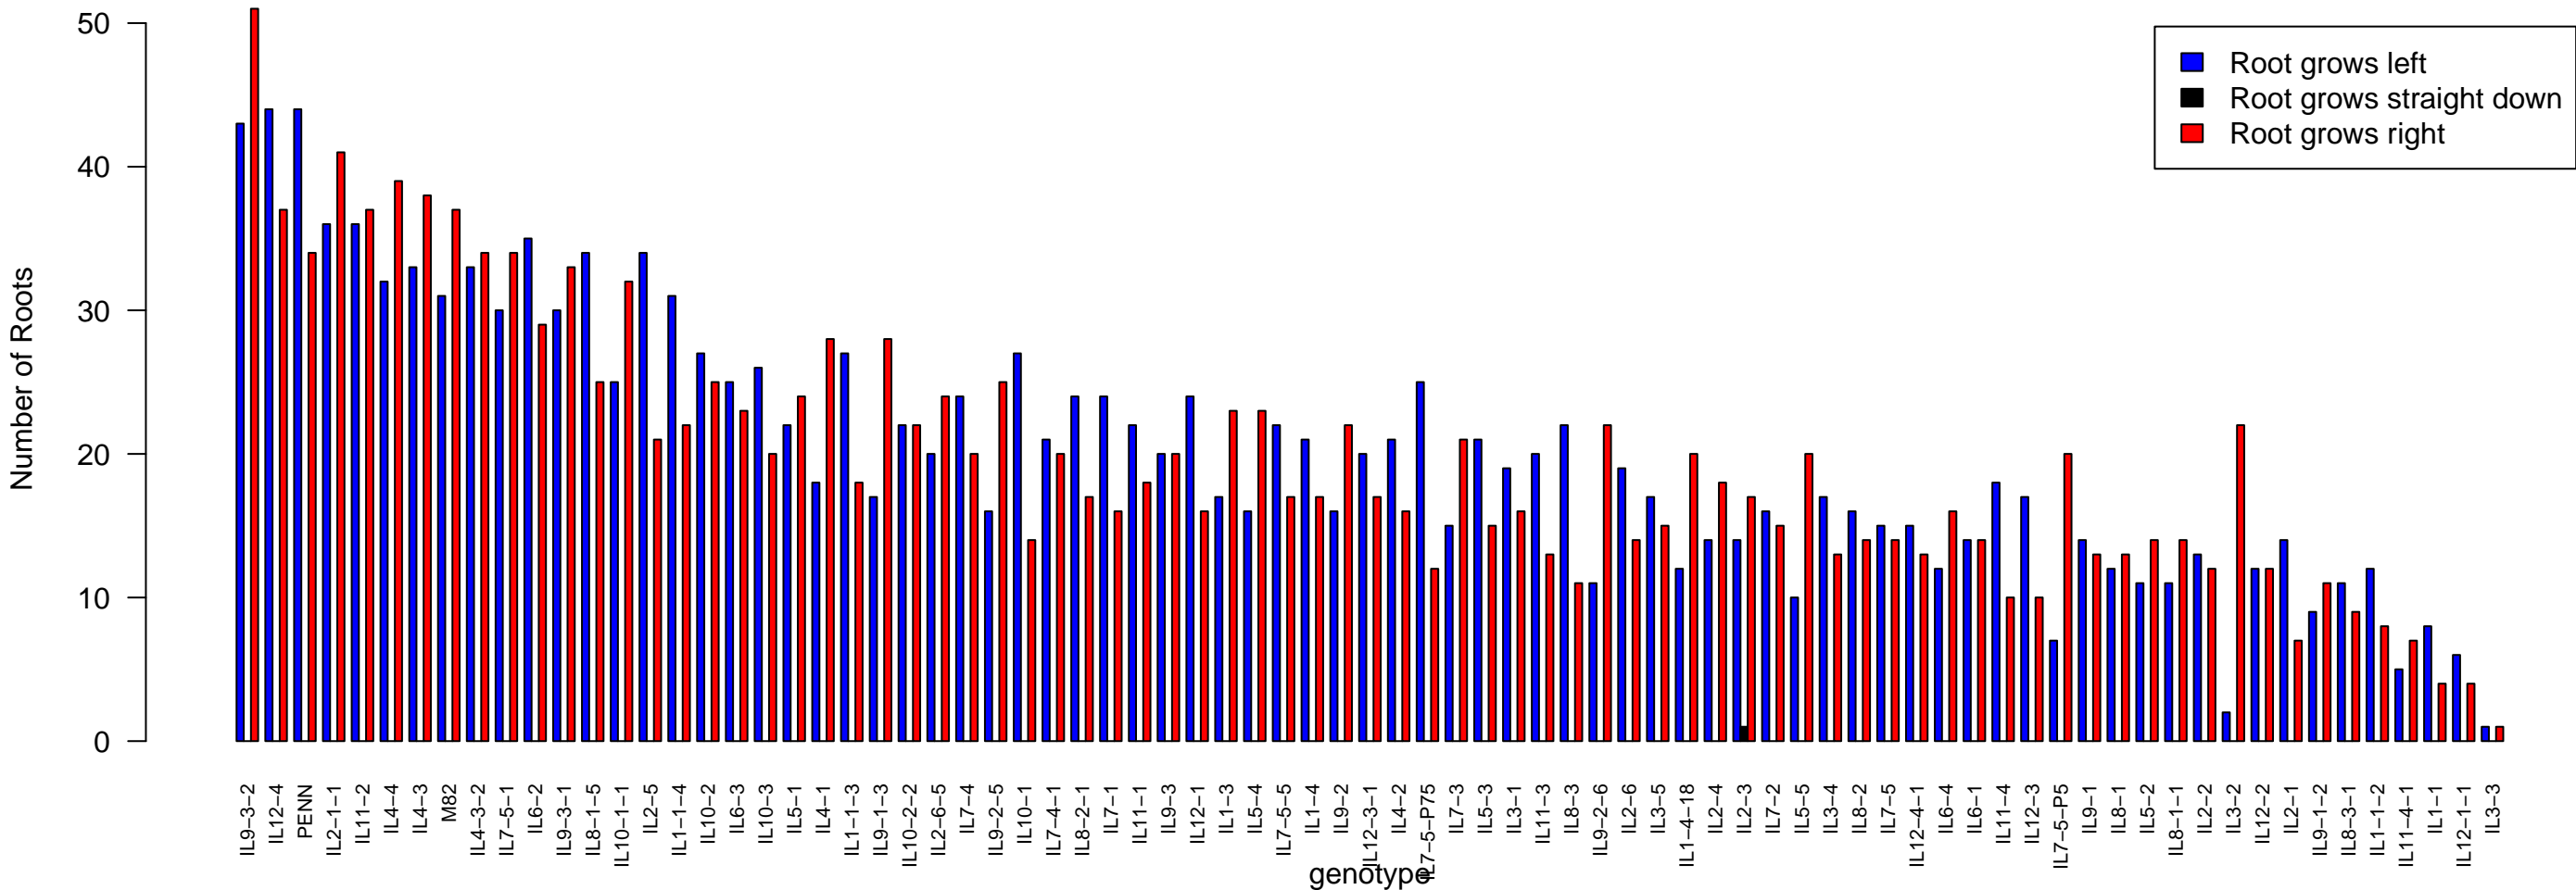

Trait: mid3rdAngSign Co-variate: experiment

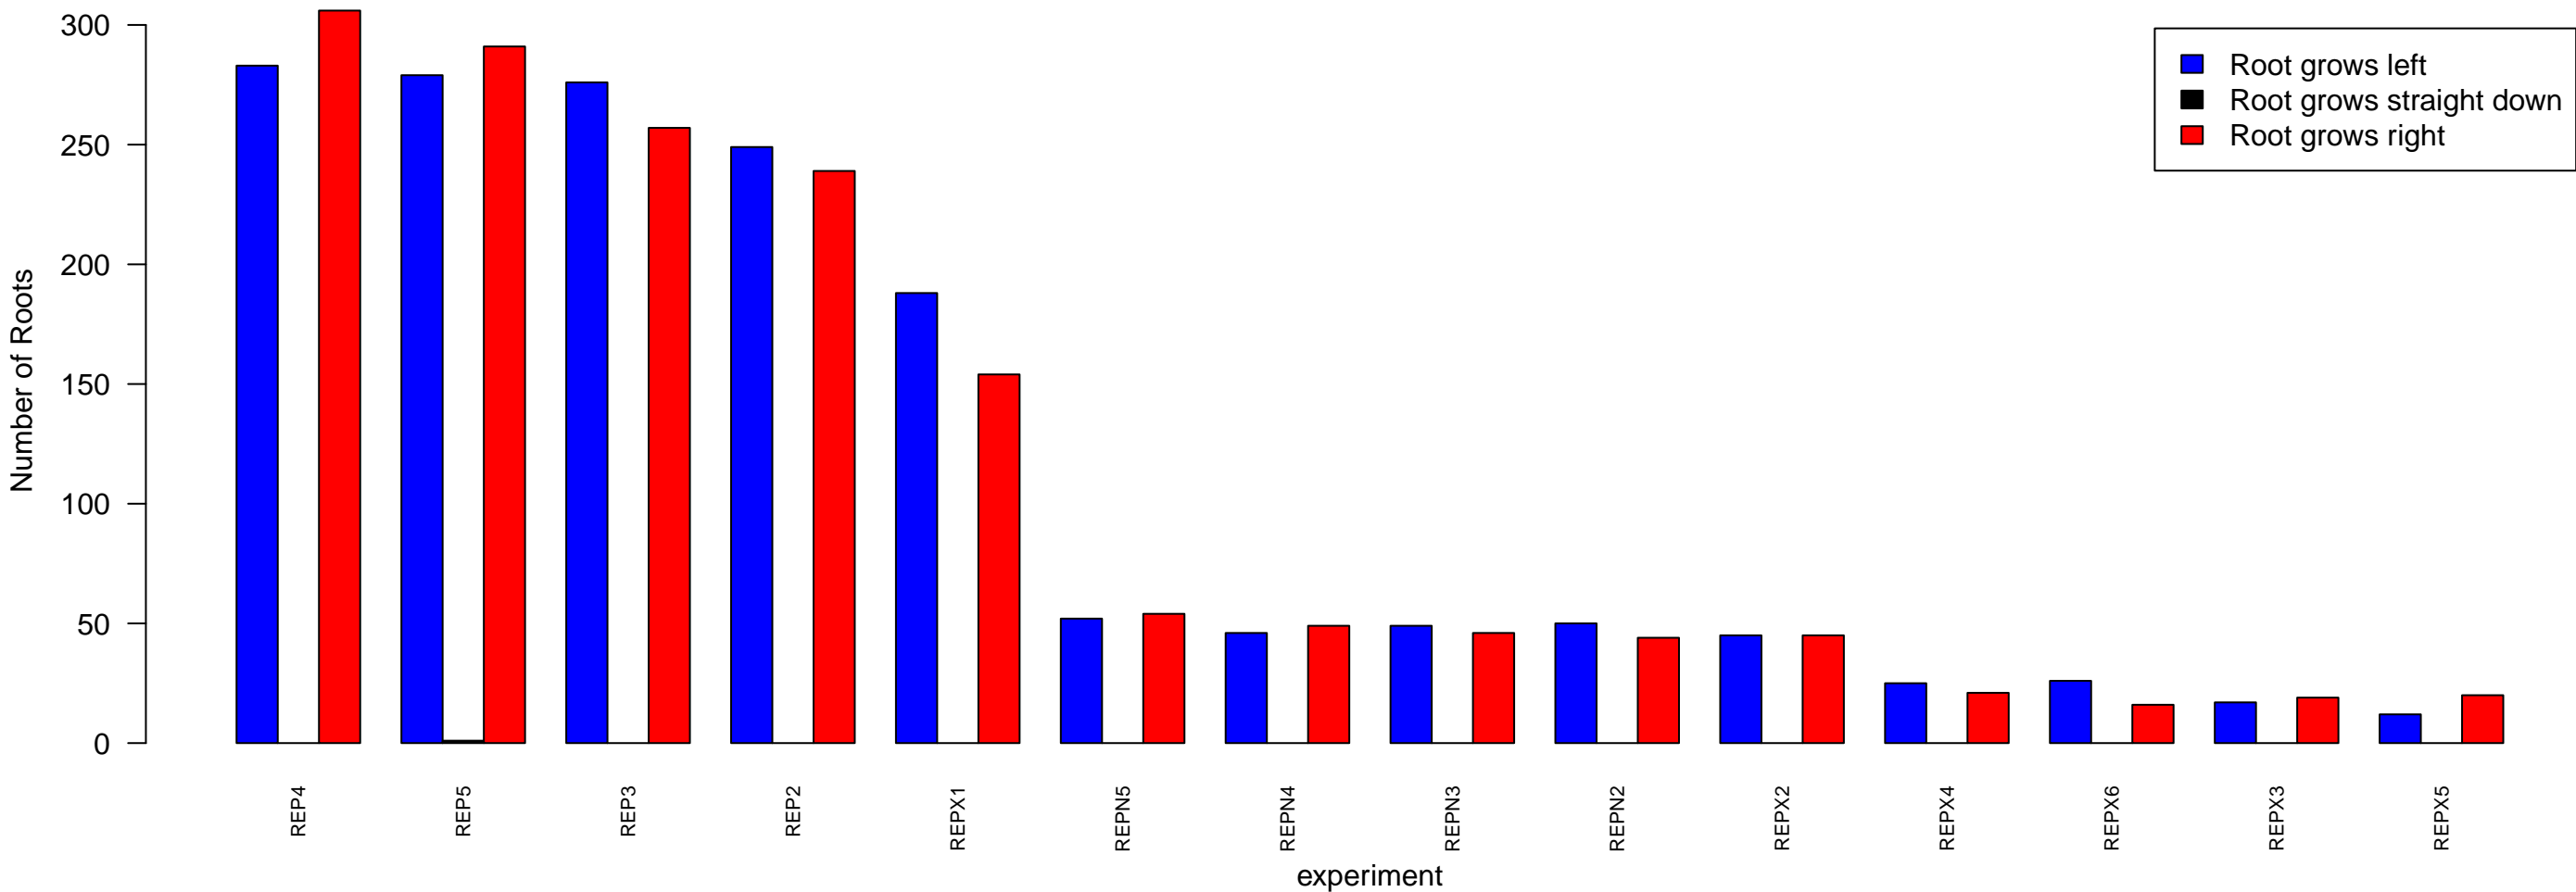

Trait: mid3rdAngSign Co-variate: germAge

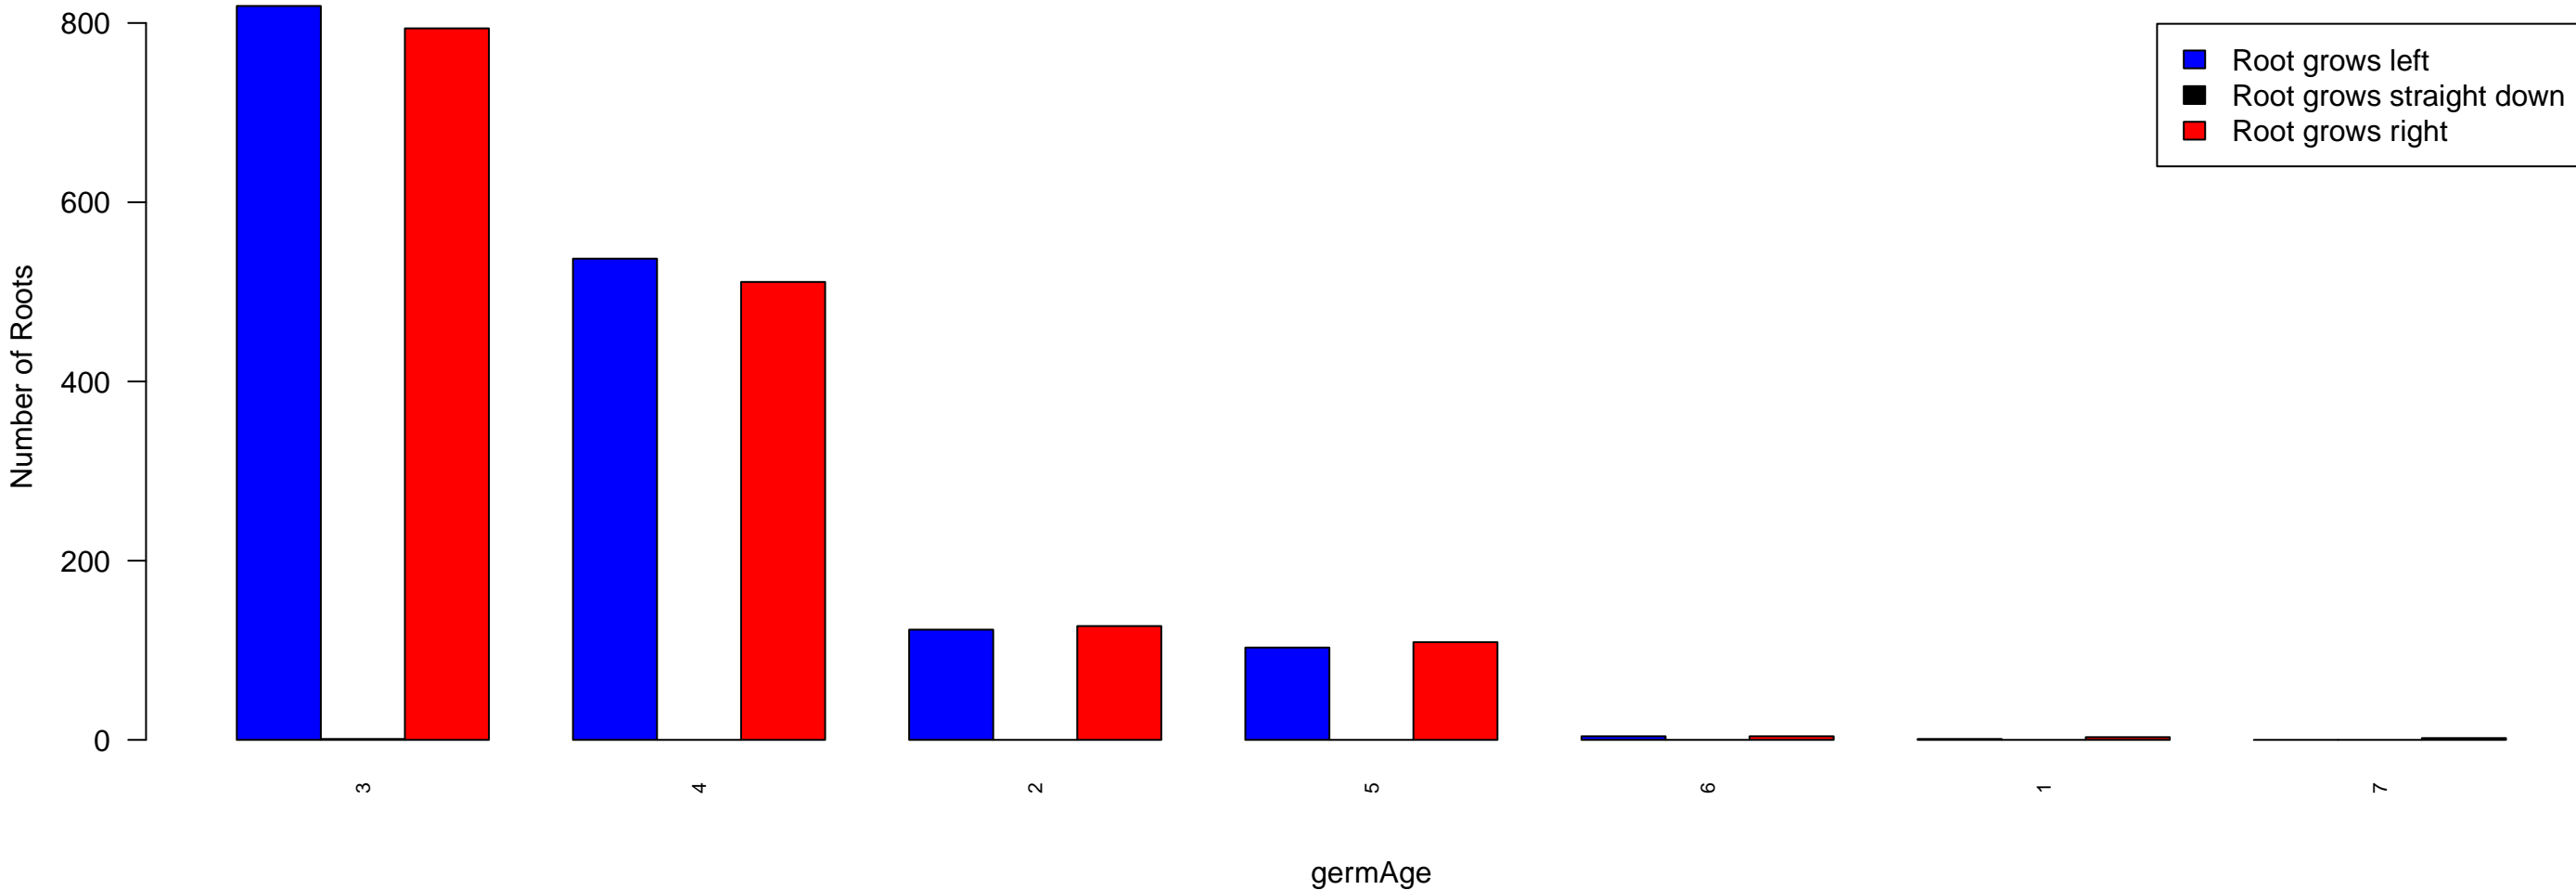

Trait: mid3rdAngSign Co-variate: rootAge

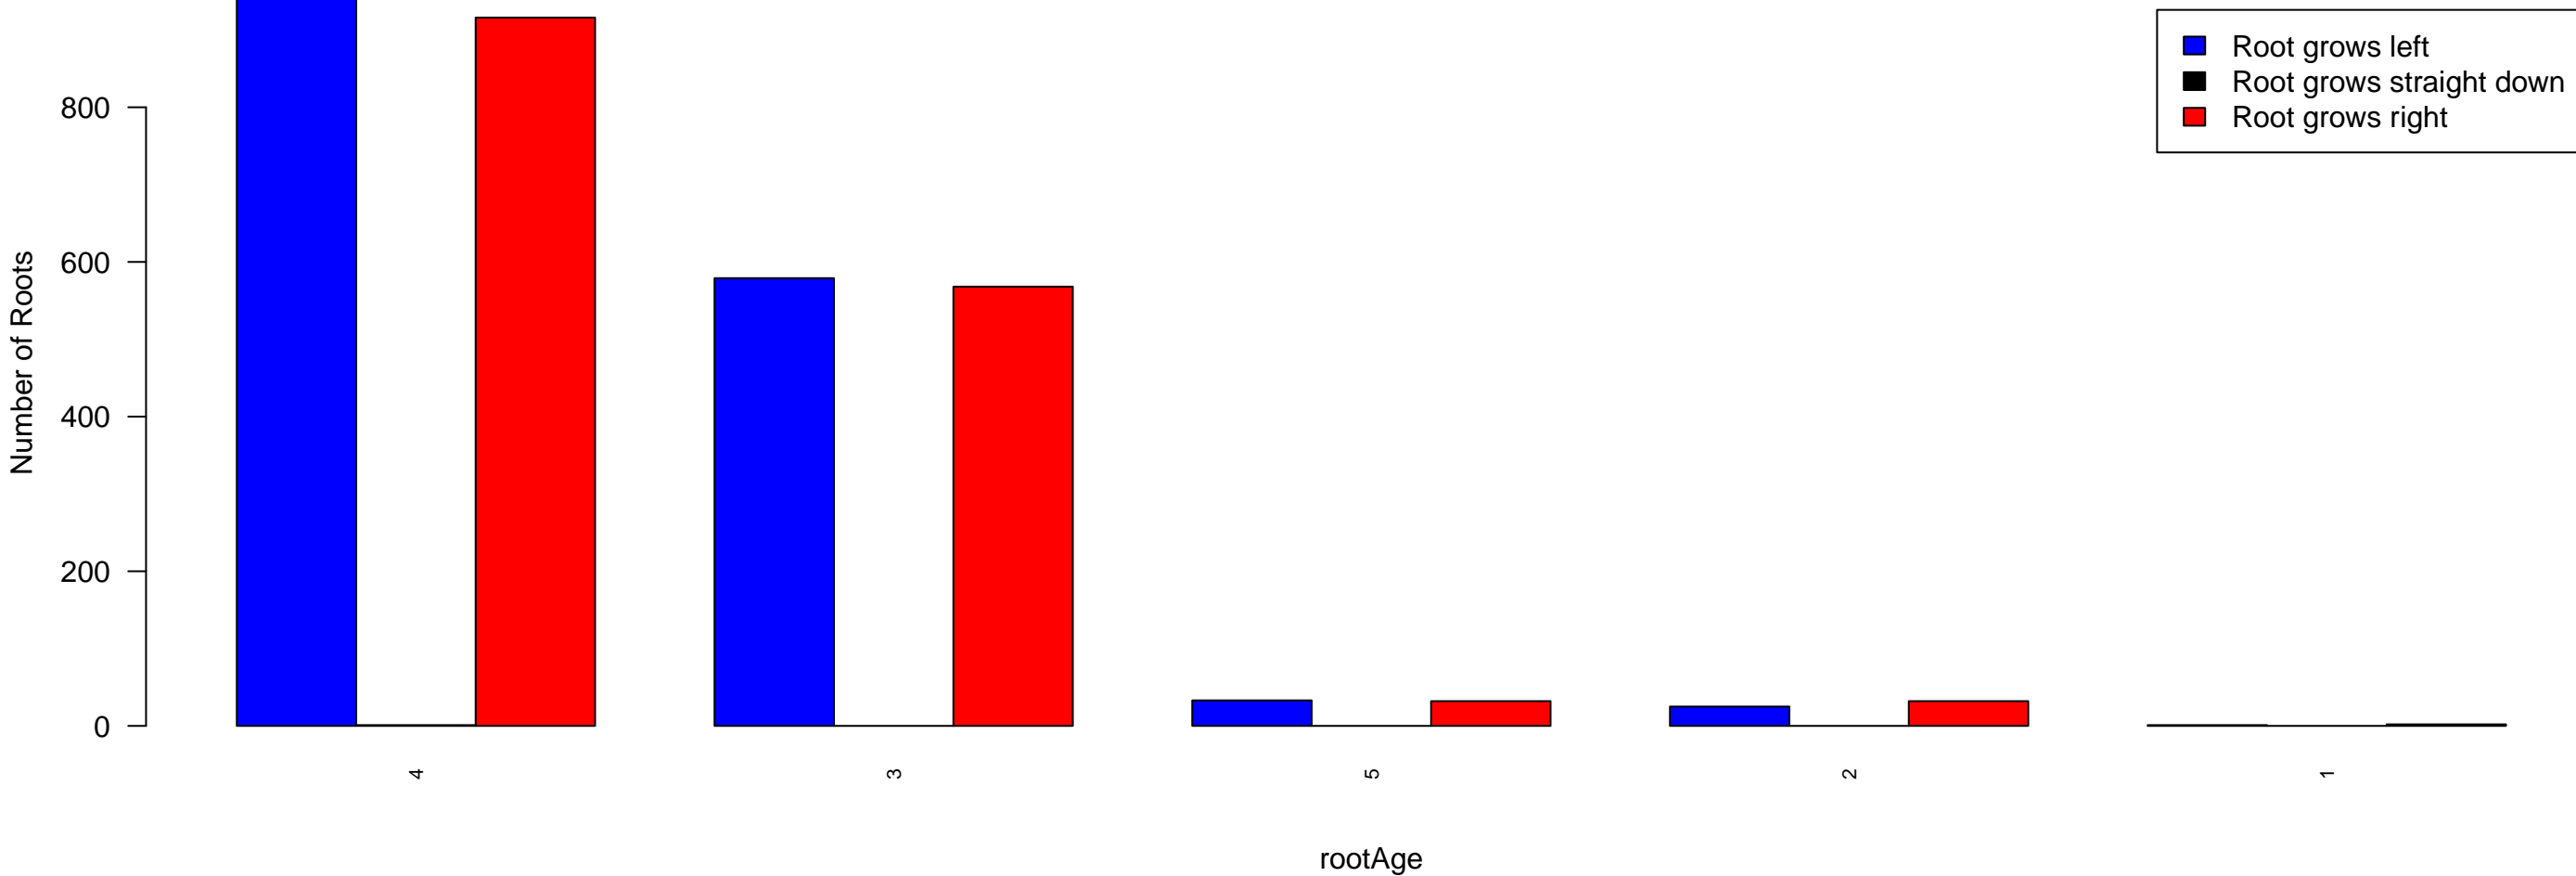

Trait: mid3rdAngSign Co-variate: replicate

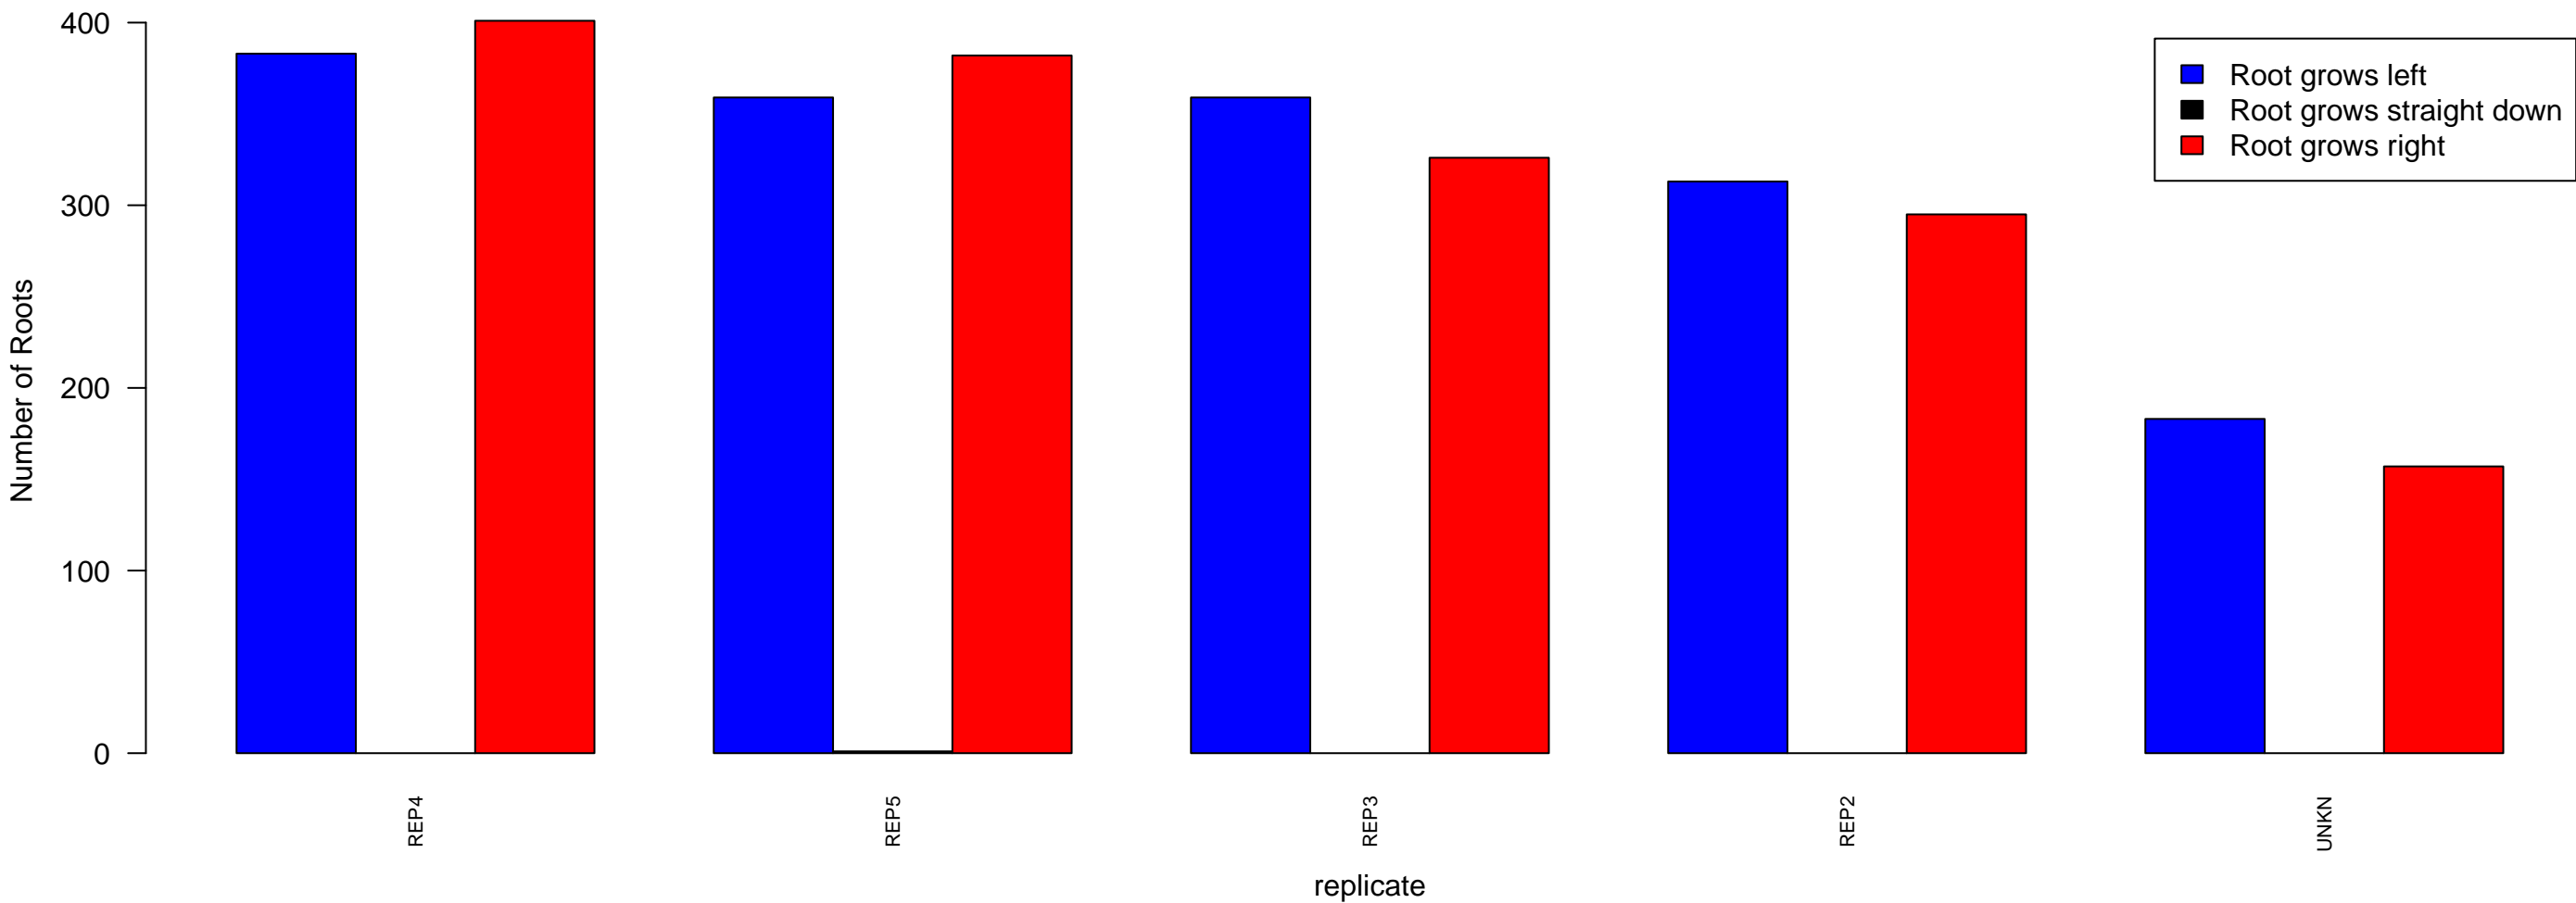

Trait: mid3rdAngSign Co-variate: collide

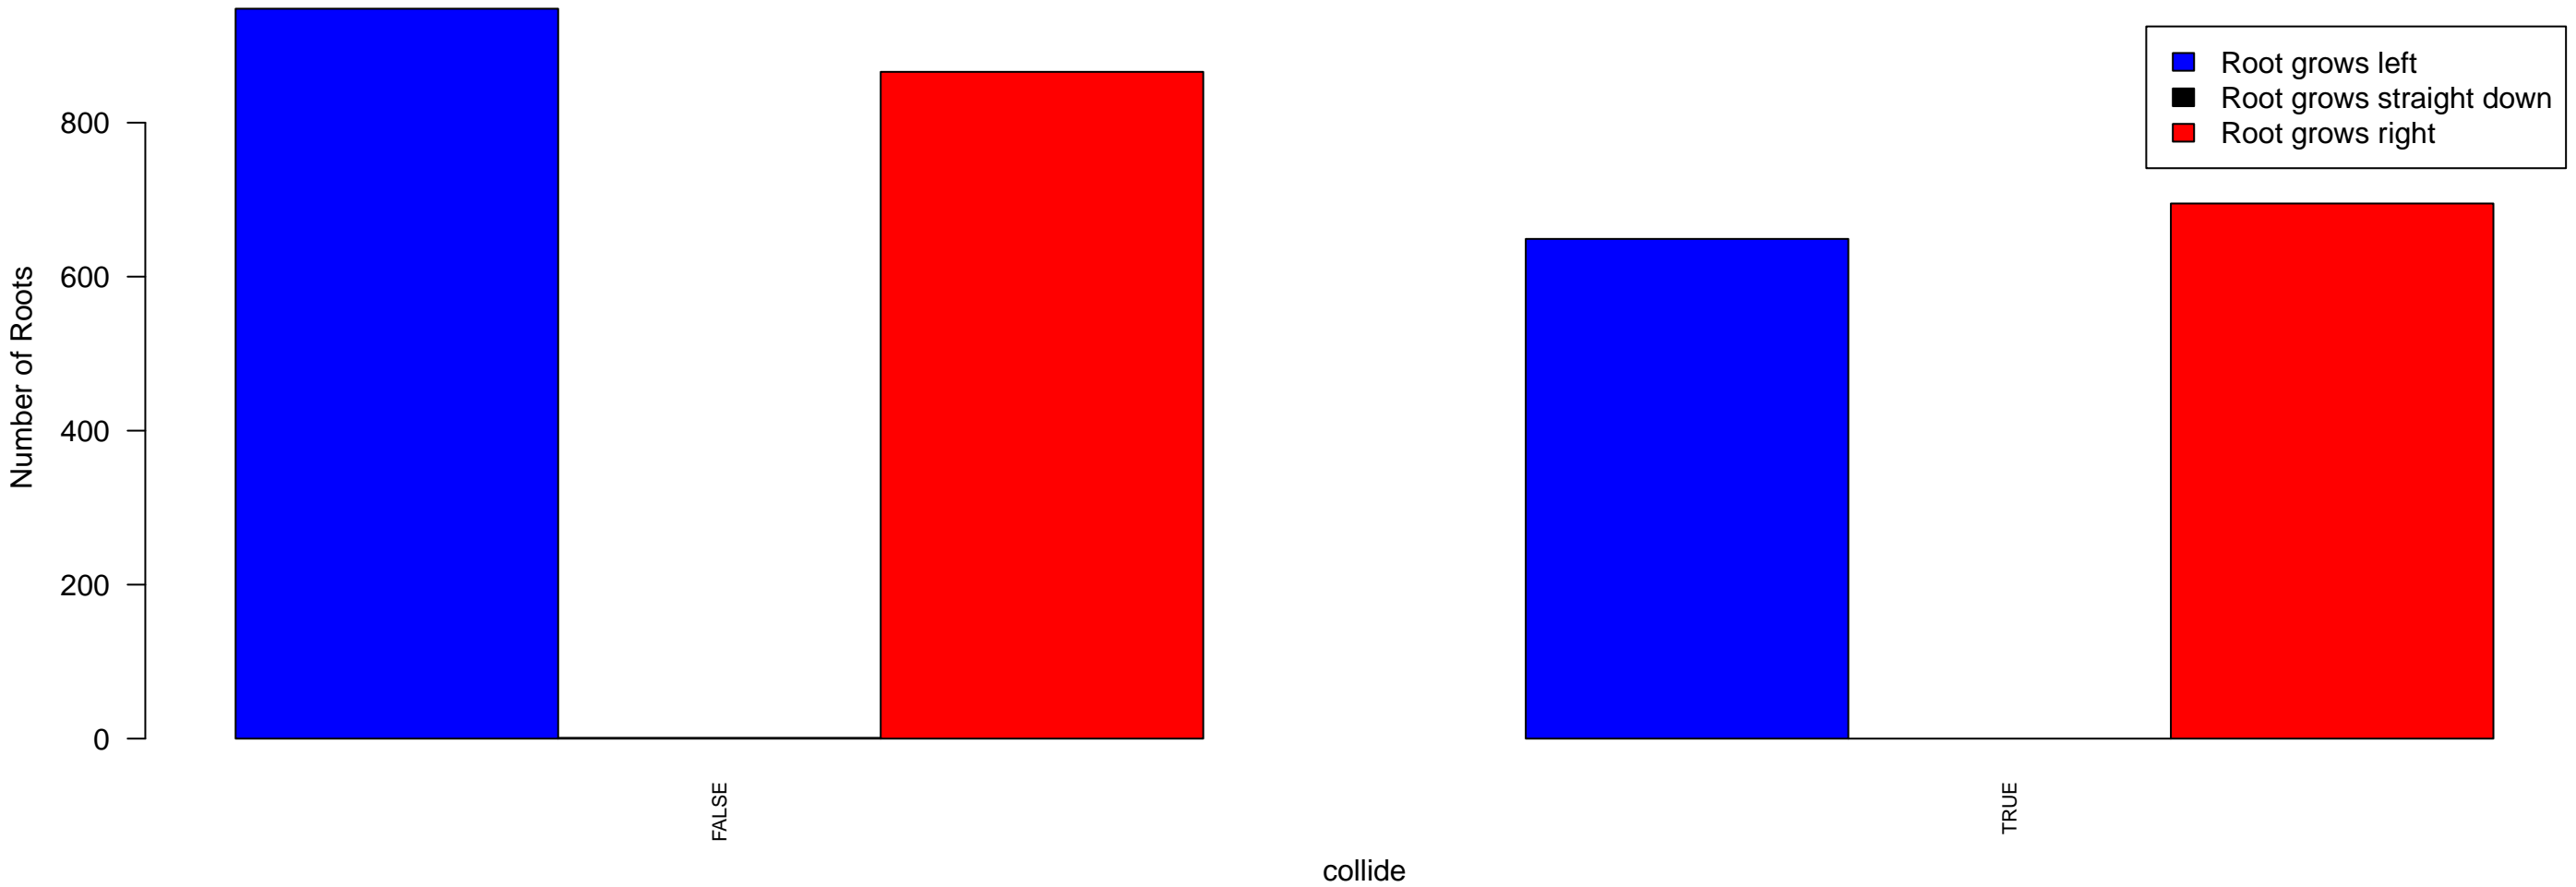

Trait: mid3rdAngSign Co-variate: along

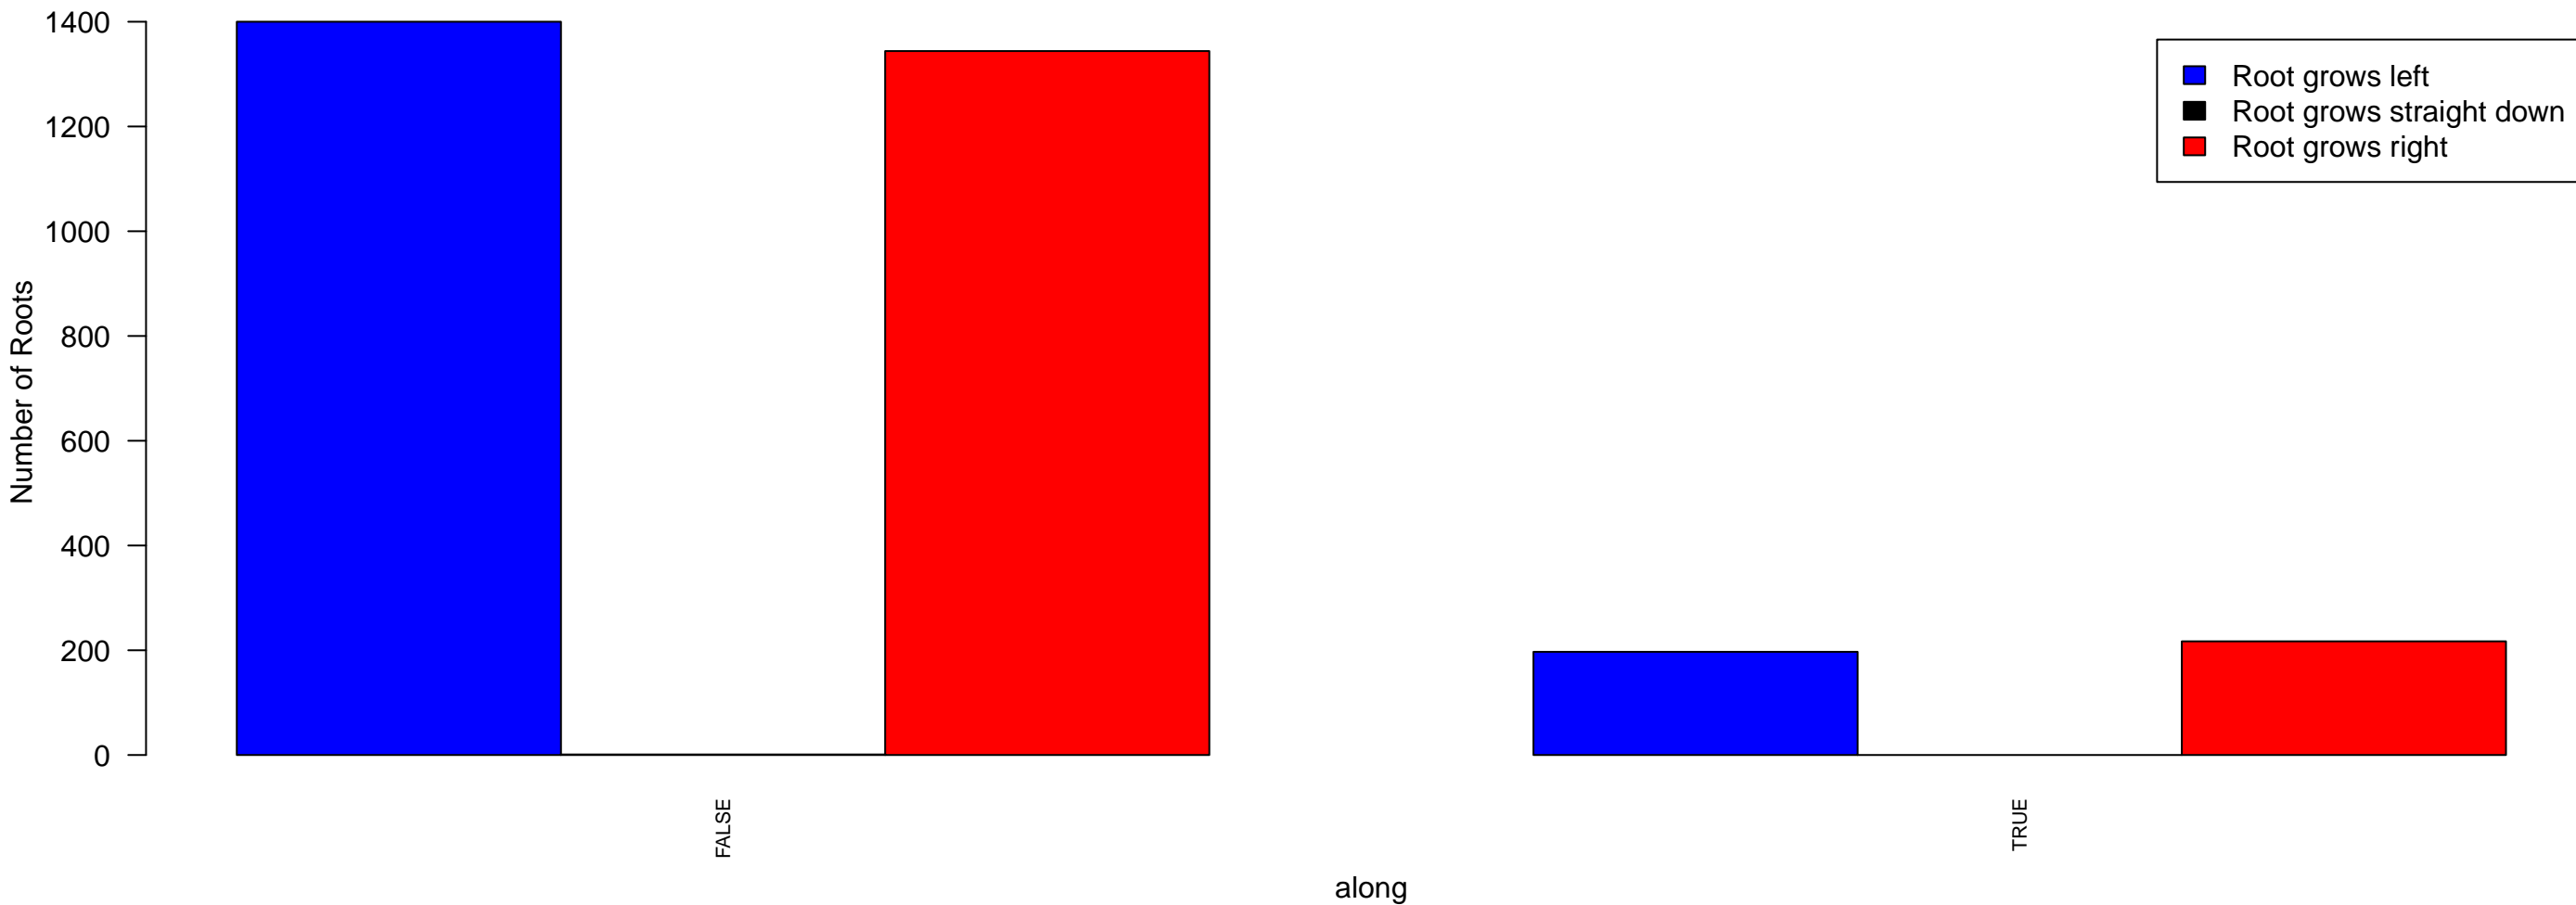

Trait: last3rdAngSign Co-variate: genotype

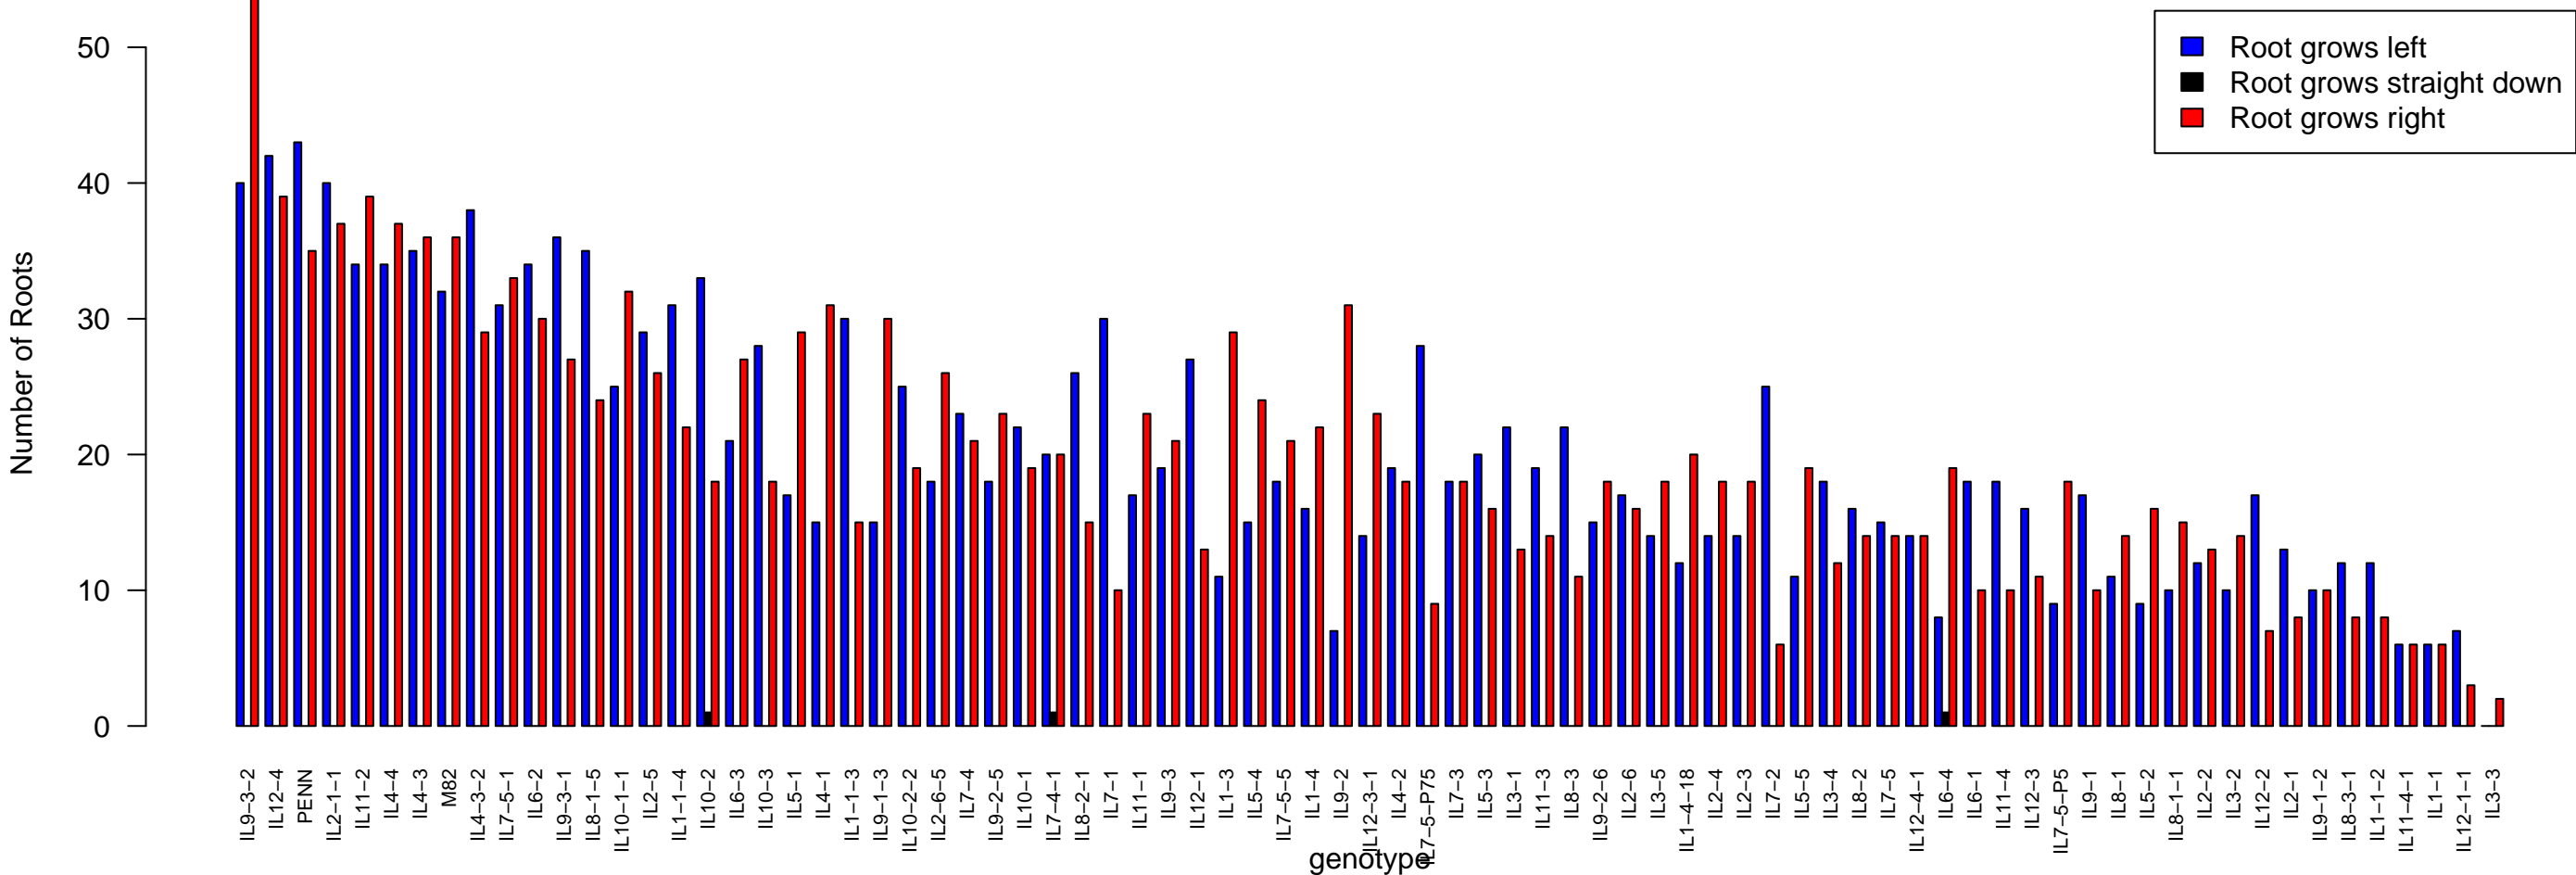

Trait: last3rdAngSign Co-variate: experiment

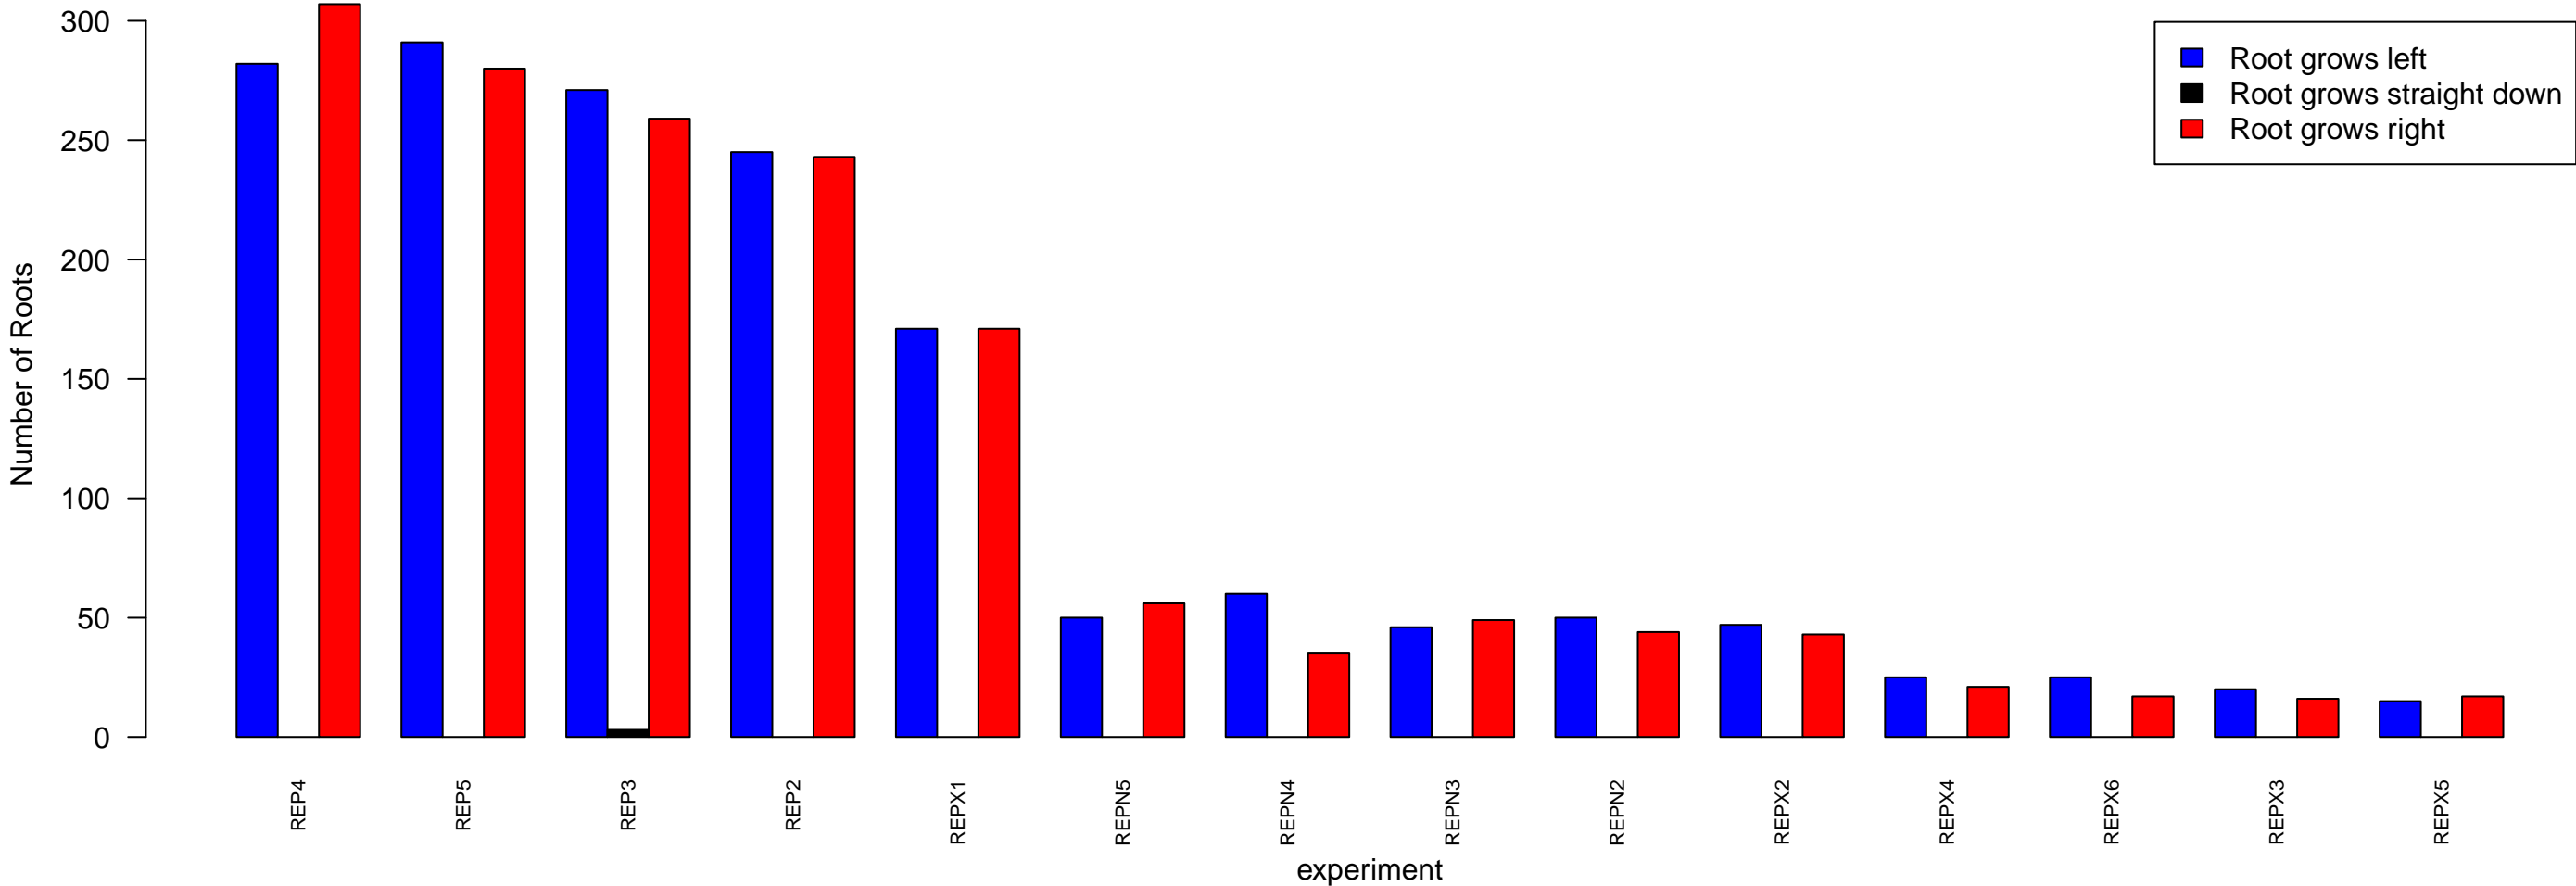

Trait: last3rdAngSign Co-variate: germAge

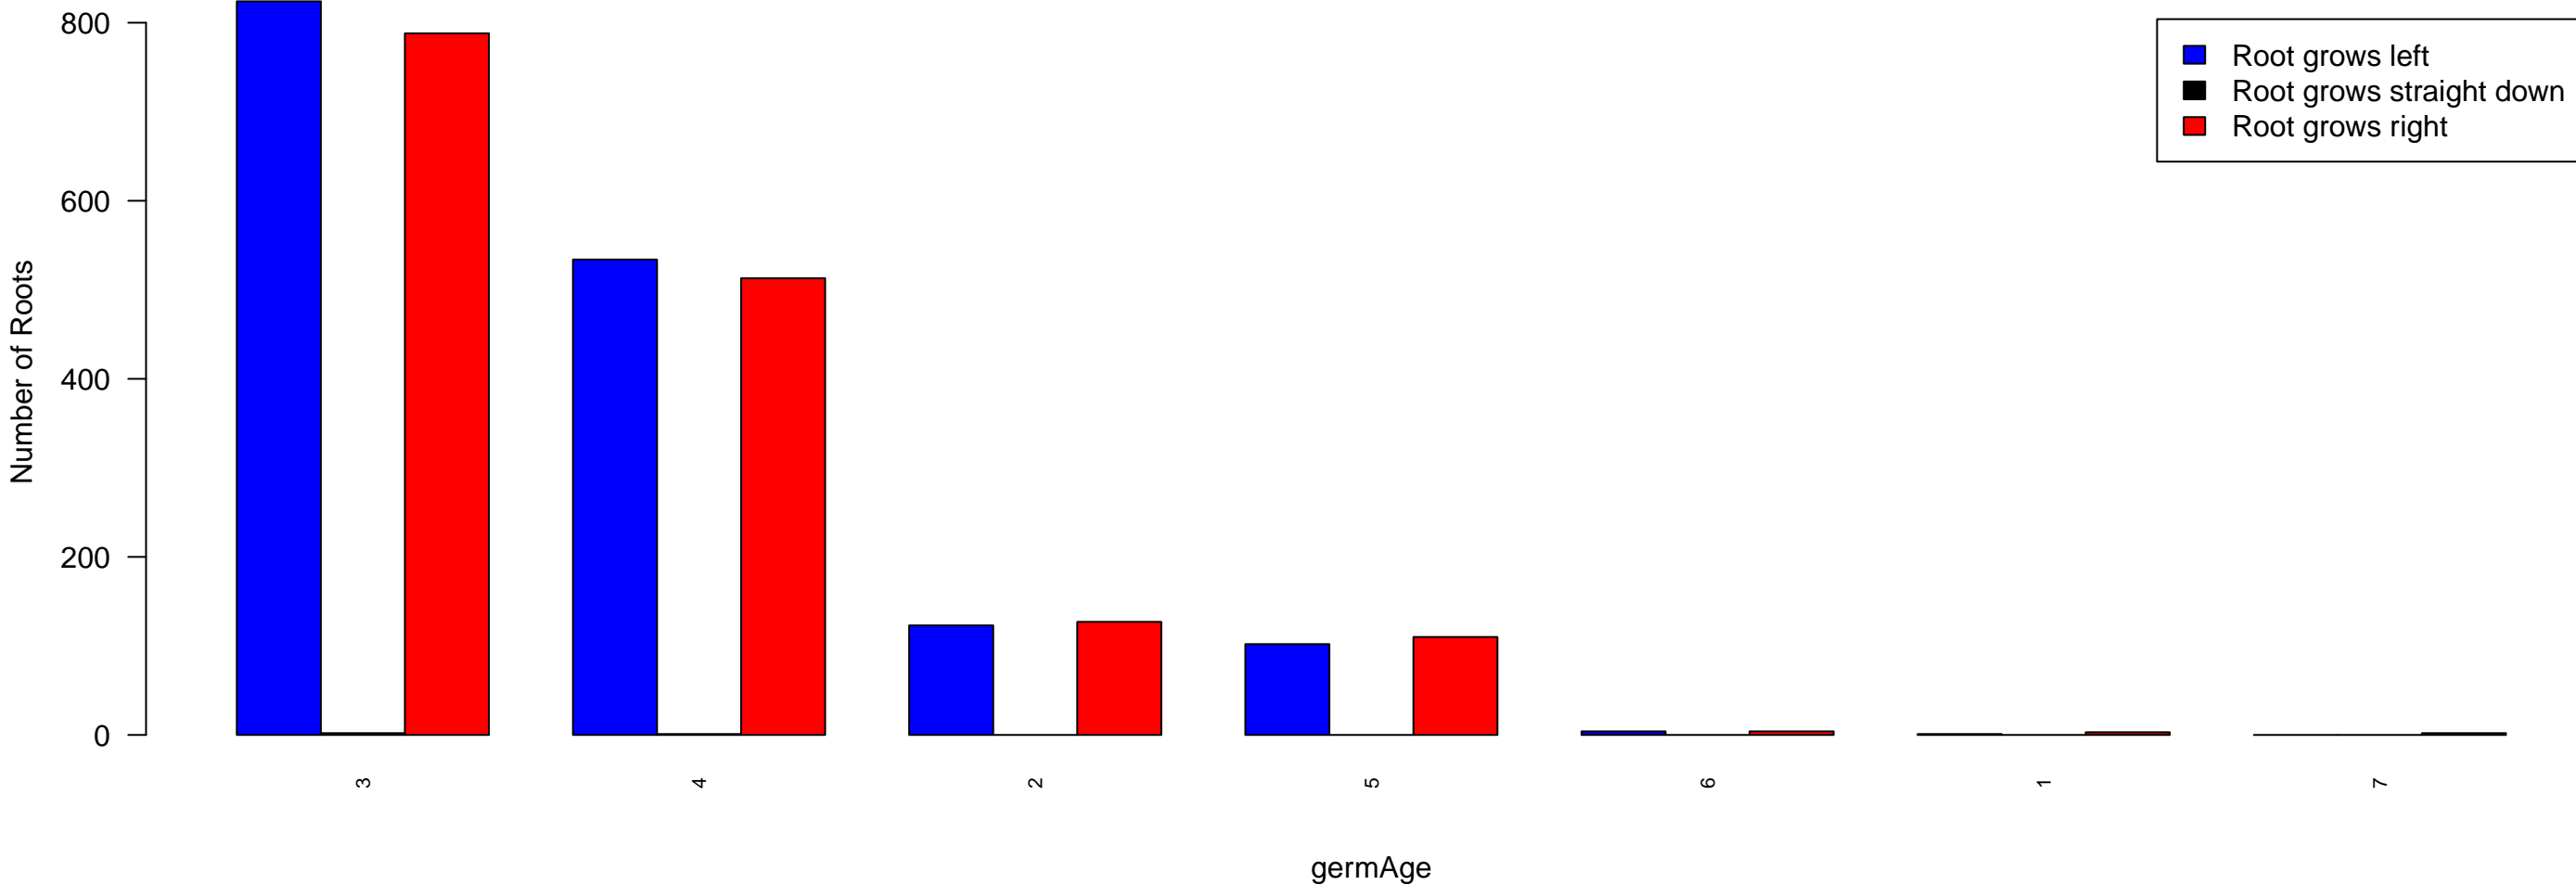

Trait: last3rdAngSign Co-variate: rootAge

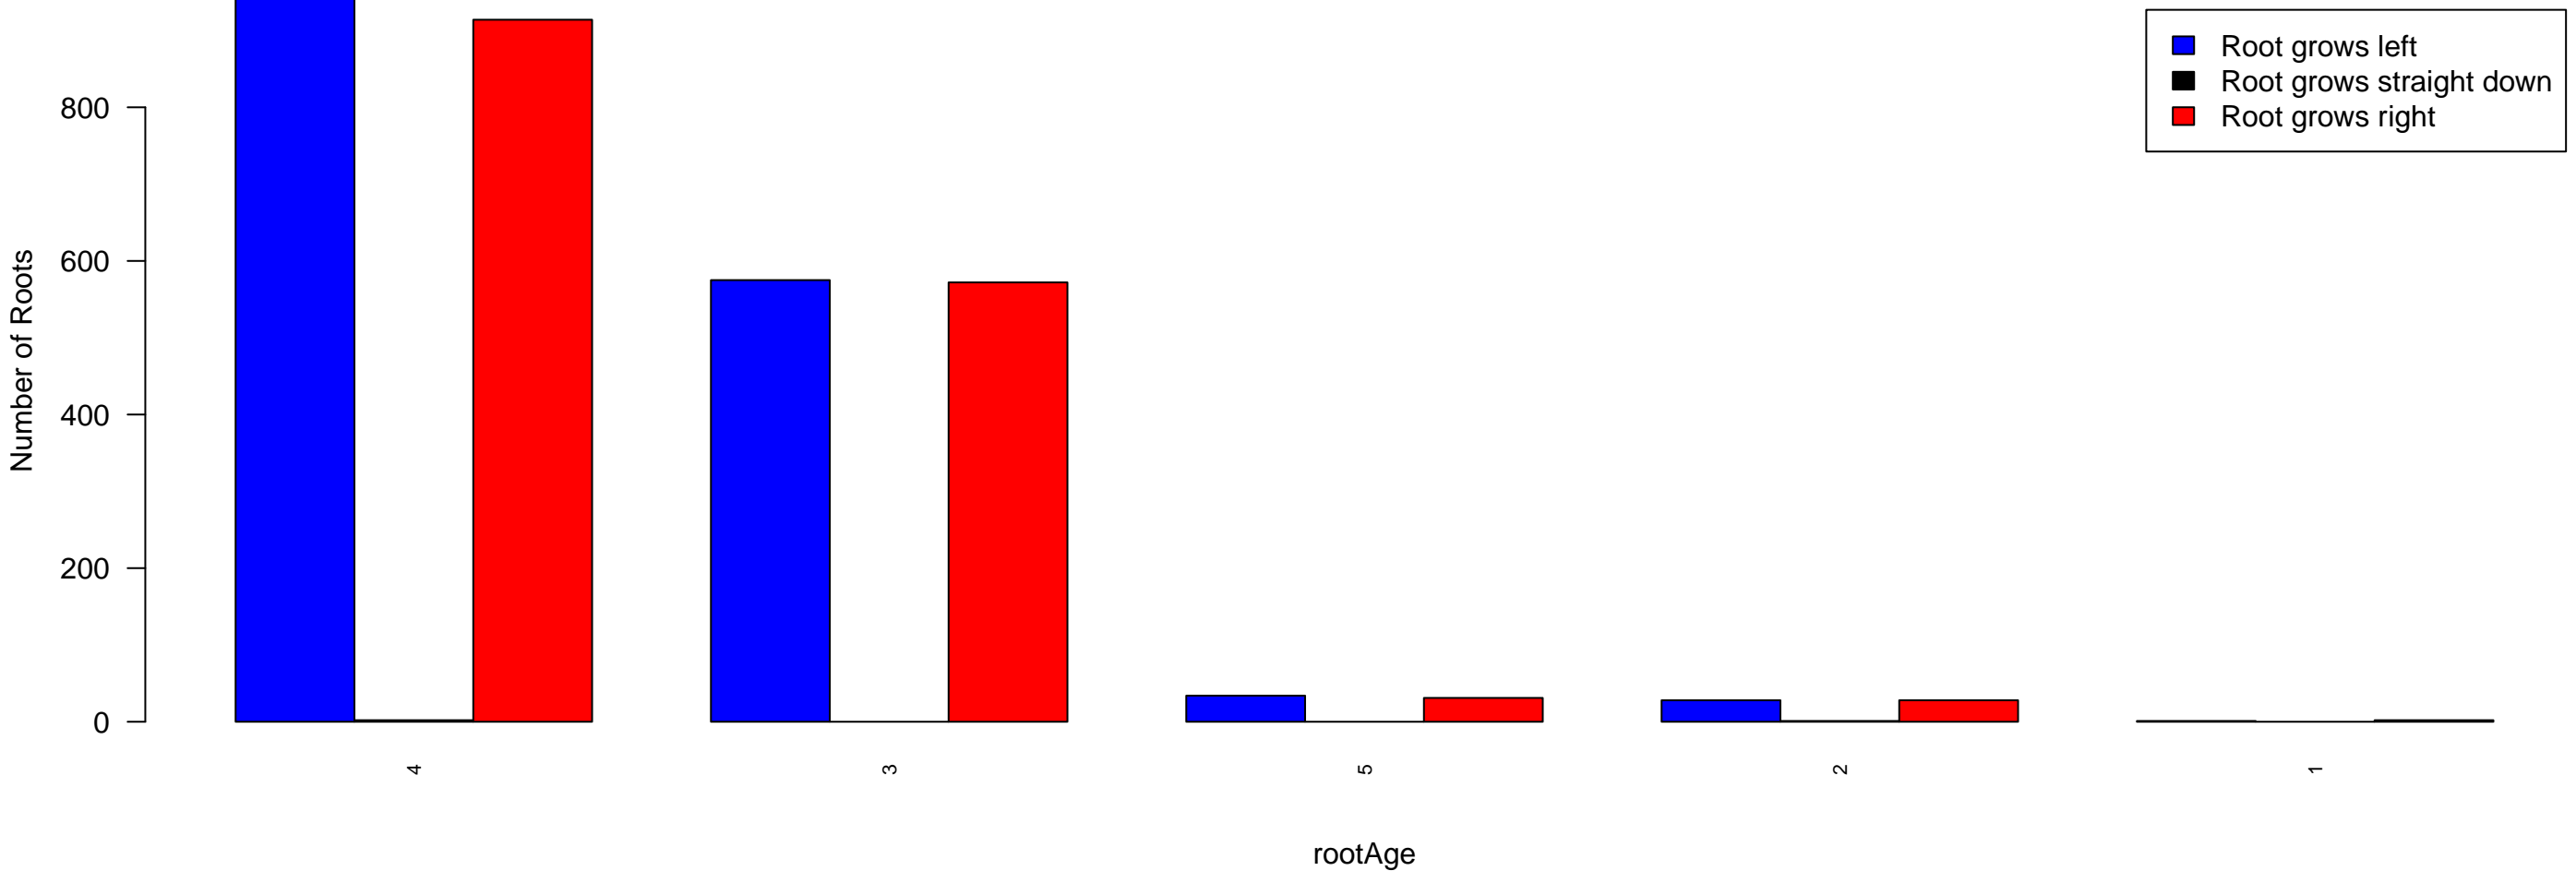

Trait: last3rdAngSign Co-variate: replicate

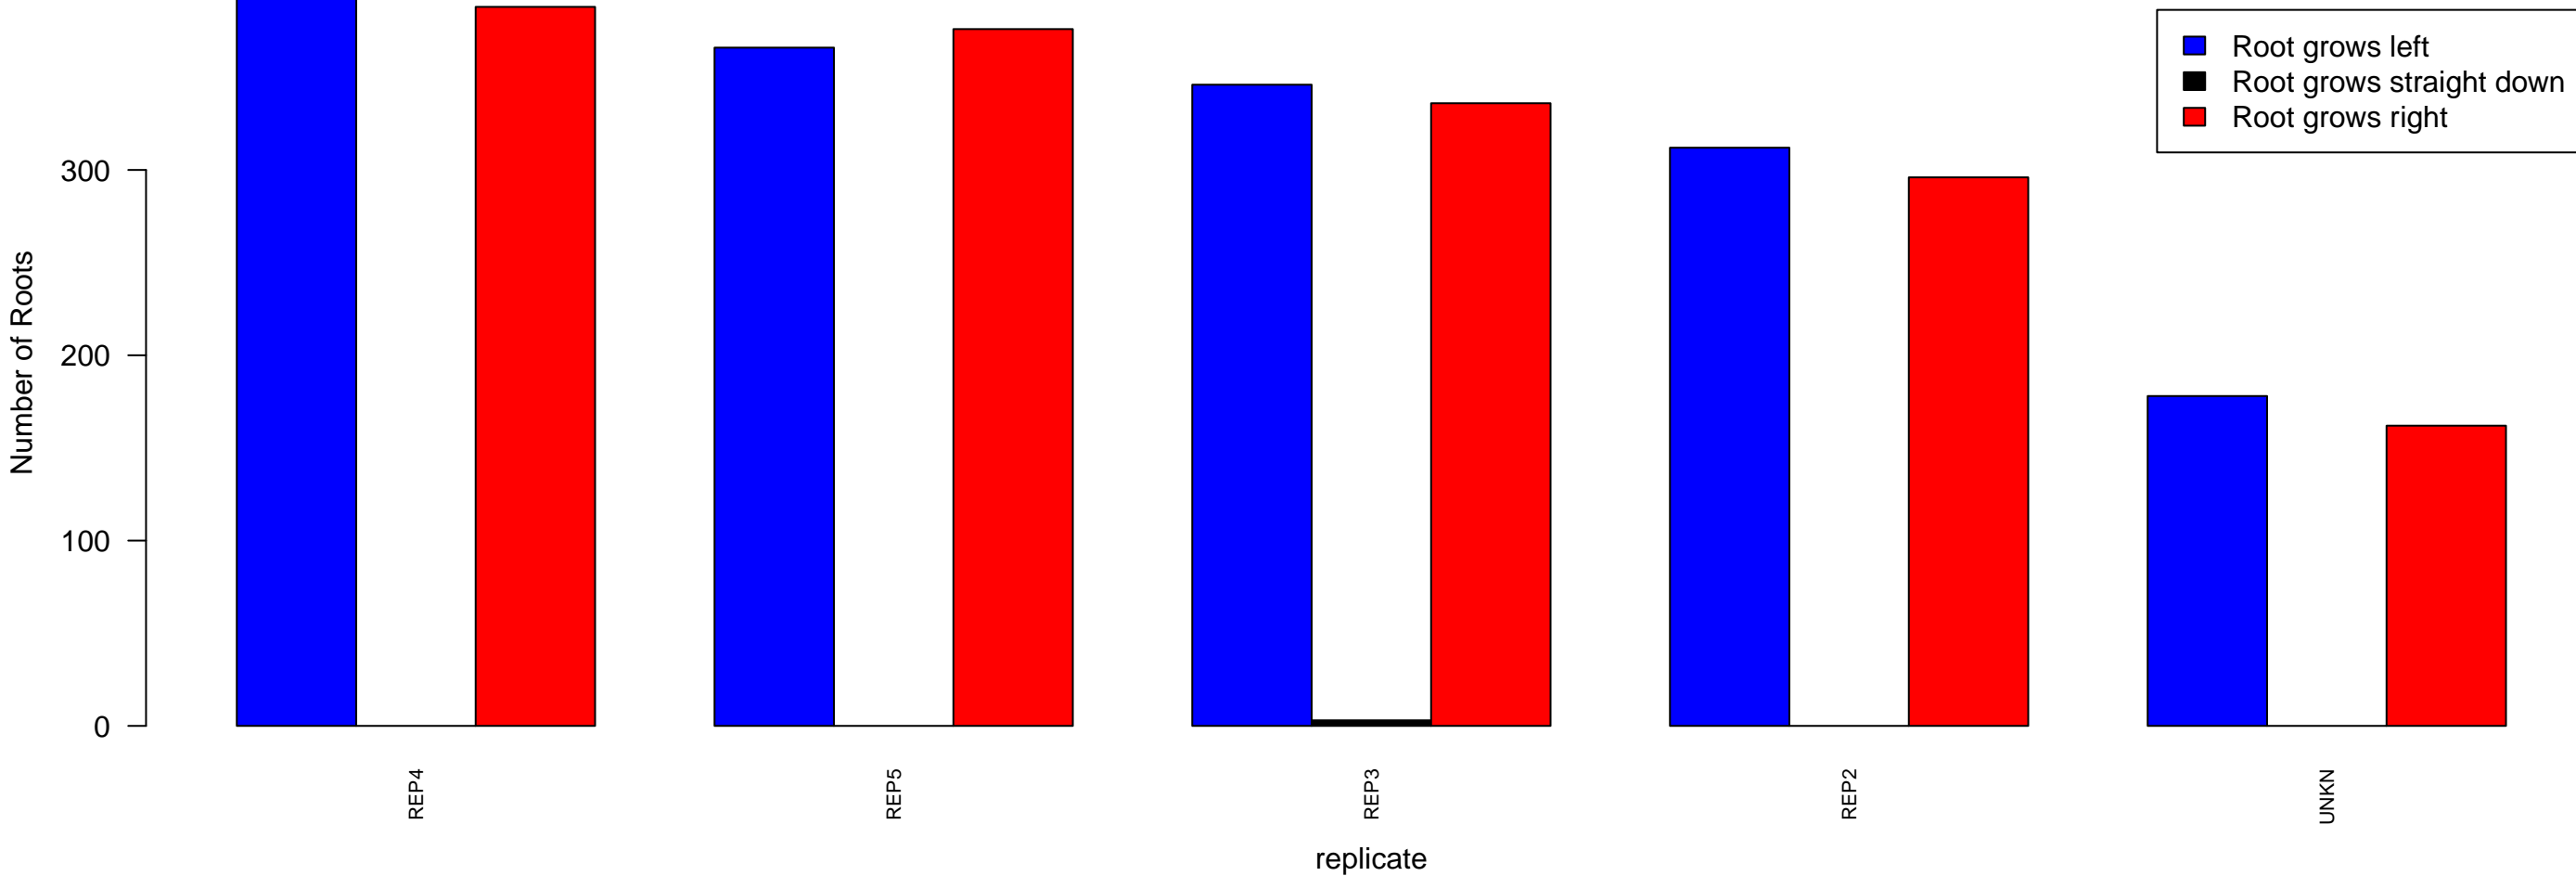

Trait: last3rdAngSign Co-variate: collide

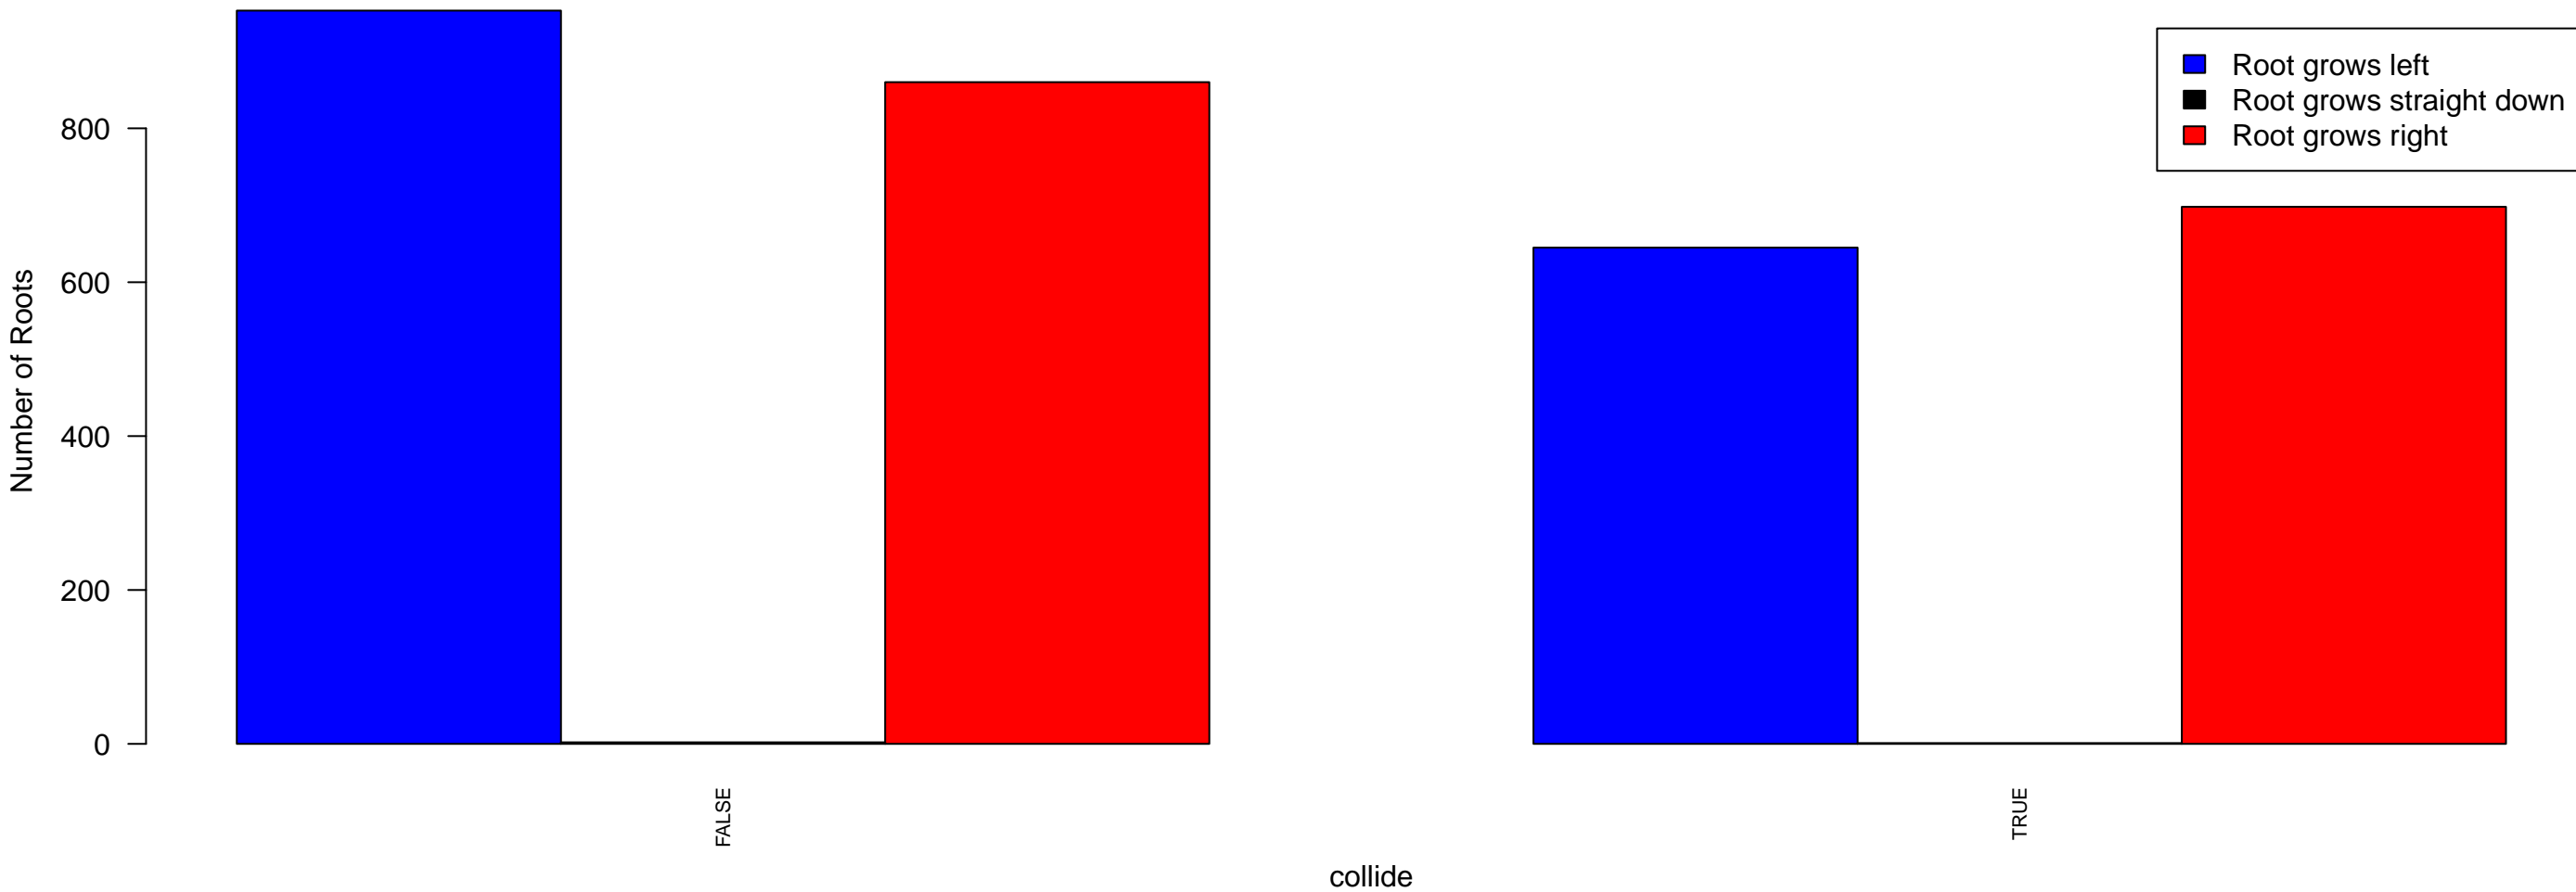

Trait: last3rdAngSign Co-variate: along

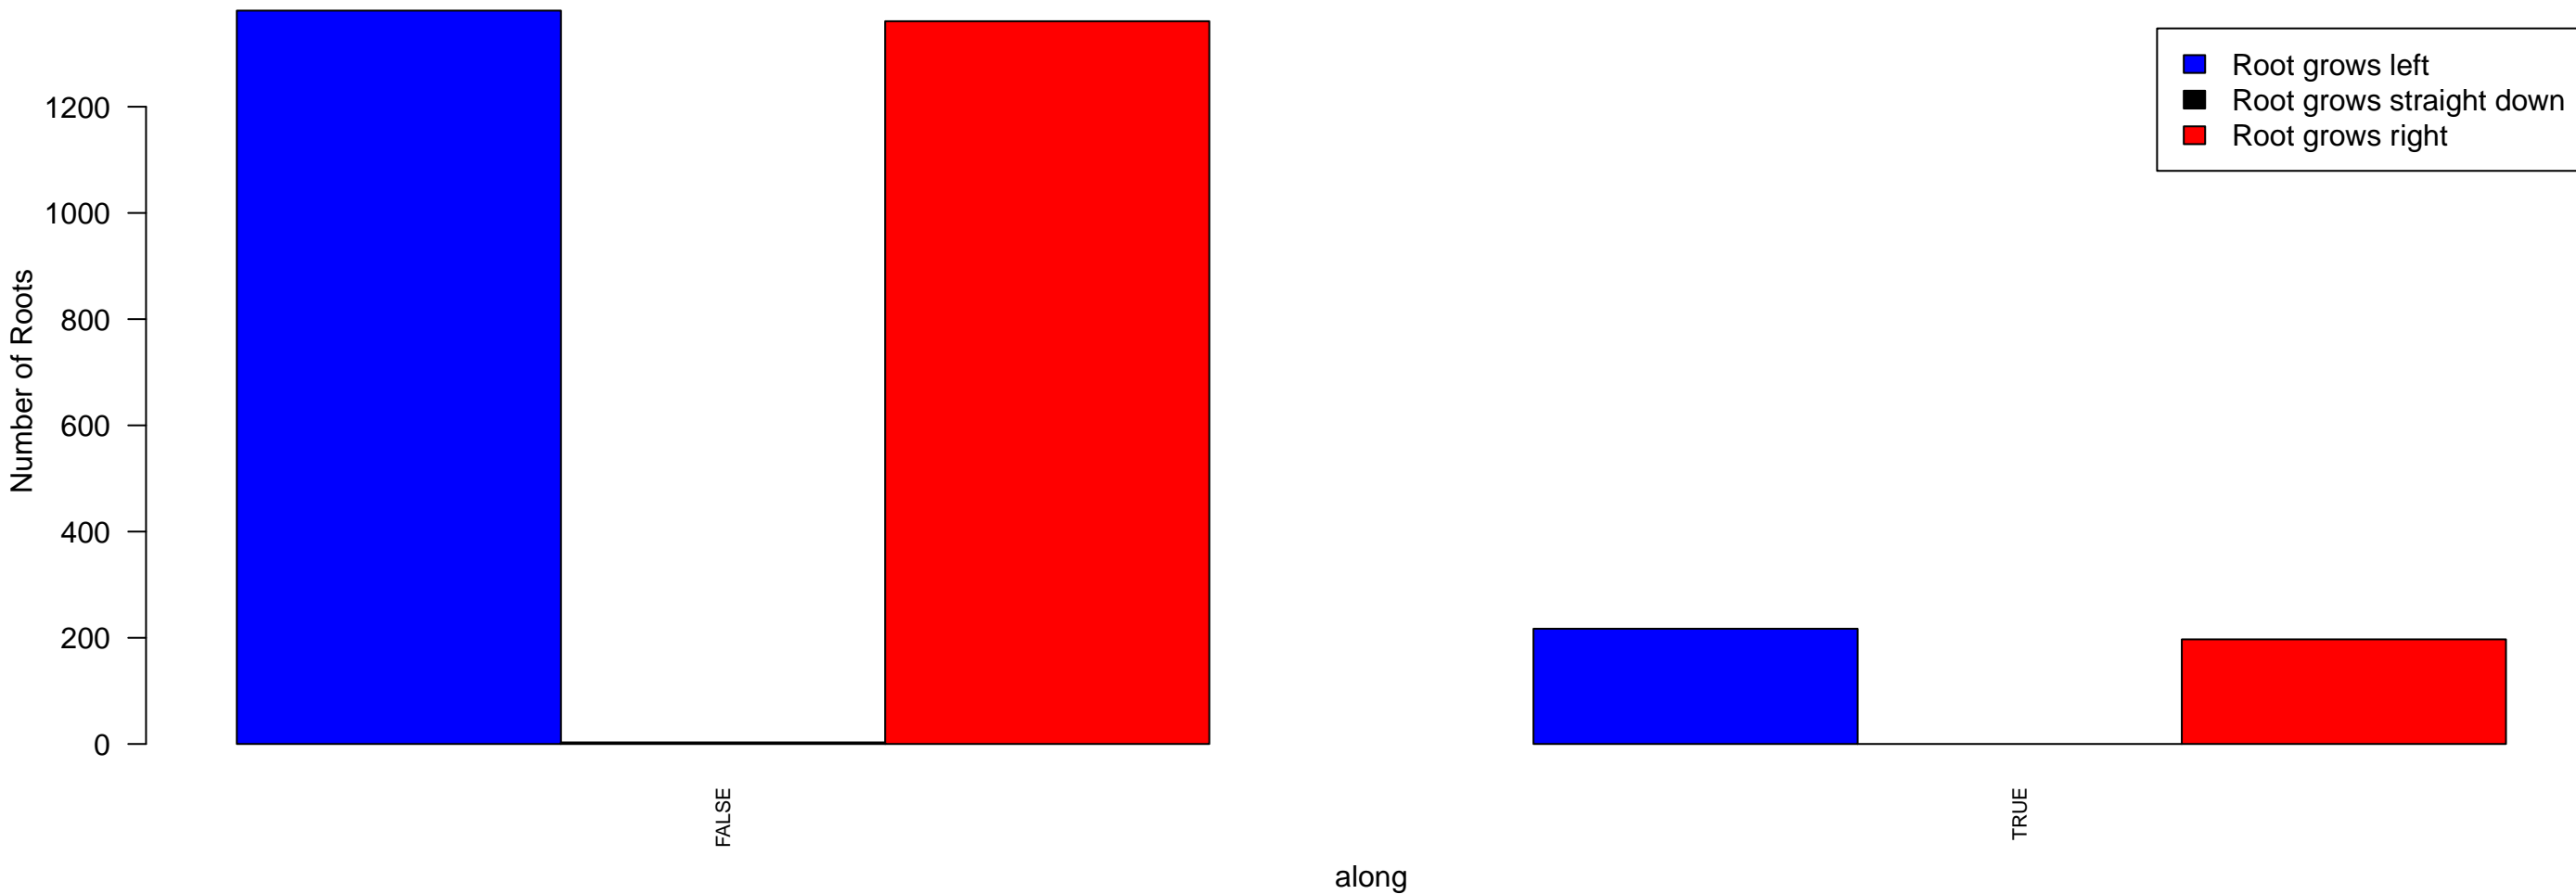

Supplement: Supplementary file 27 [file 2]
