# Supplementary material
Source: publisher figshare collection journal article supplement (https://gsajournals.figshare.com/articles/dataset/_/7237562)

# Angle Rate Away T0

deg/225s

3  
2  
1  
0  
-1  
-2  
-3

+ \* p < 0.05  
++ \*\* p < 0.01  
+++ \*\*\* p < 0.001

Data filtering: >= 3 roots/IL

Bars = std. err. (sigma) from lm/glht

IL10-1  
IL10-2  
IL10-2-2  
IL10-3  
IL11-1  
IL11-2  
IL11-4  
IL11-4-1  
IL12-1  
IL12-1-1  
IL12-2  
IL12-3  
IL12-3-1  
IL12-4  
IL12-4-1  
IL1-1-2  
IL1-3  
IL1-4  
IL1-4-18  
IL2-1  
IL2-1-1  
IL2-2  
IL2-4  
IL2-6-5  
IL3-5  
IL4-1  
IL4-1-1  
IL4-3  
IL4-3-2  
IL4-4  
IL5-1  
IL5-2  
IL5-5  
IL6-1  
IL6-2  
IL6-4  
IL7-1  
IL7-3  
IL7-4  
IL7-4-1  
IL7-5  
IL7-5-1  
IL7-5-5  
IL8-1  
IL8-1-1  
IL8-1-5  
IL8-3  
IL9-1  
IL9-1-2  
IL9-2  
IL9-2-6  
IL9-3-1  
M82  
IL7-5-P5  
PENN

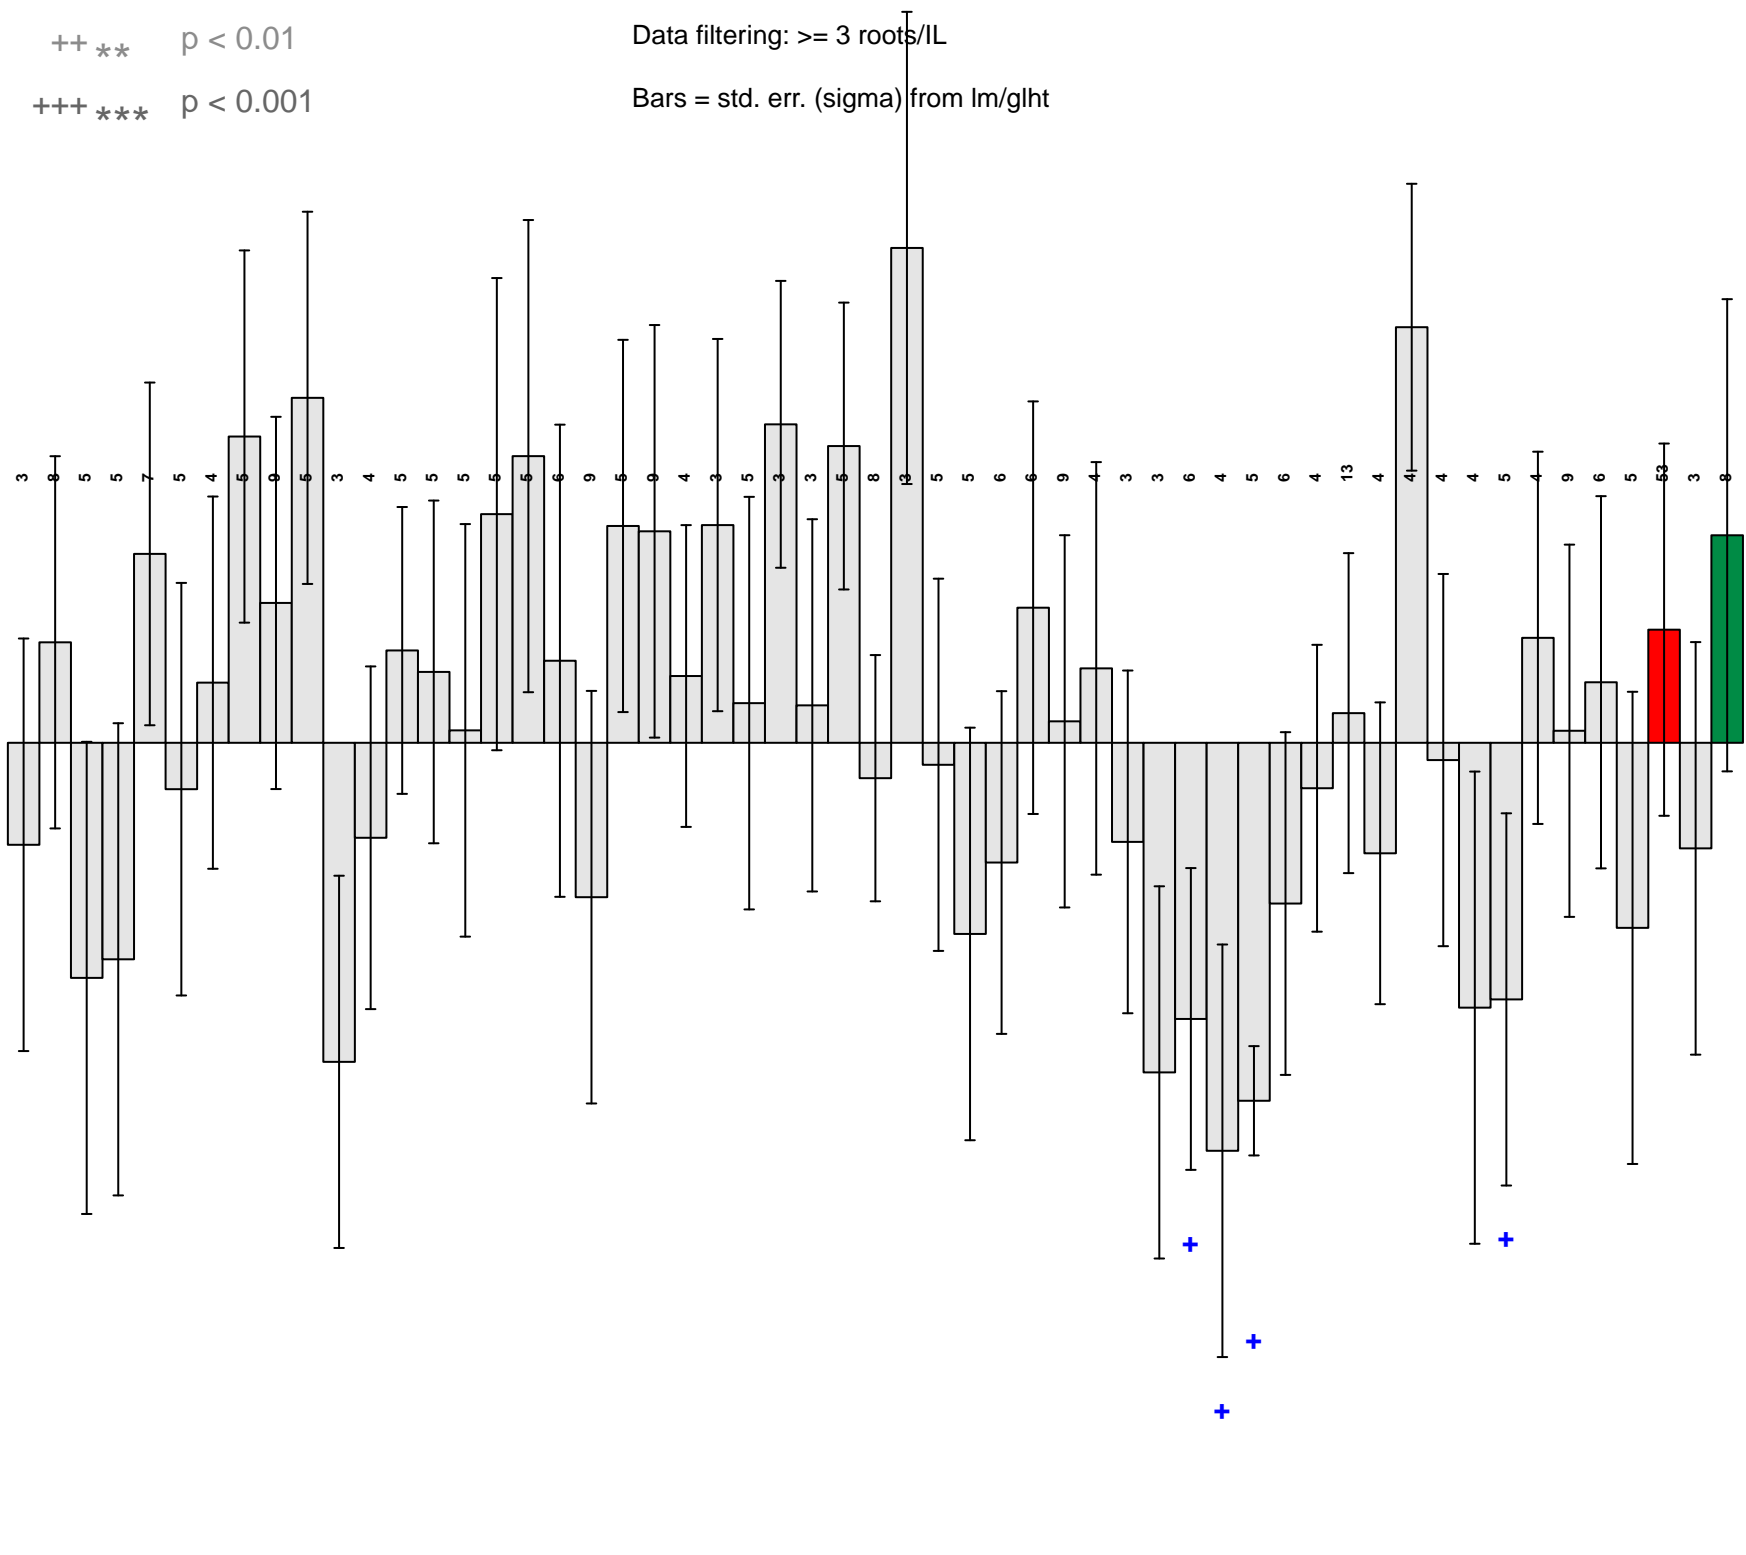

# Angle Rate Away T1

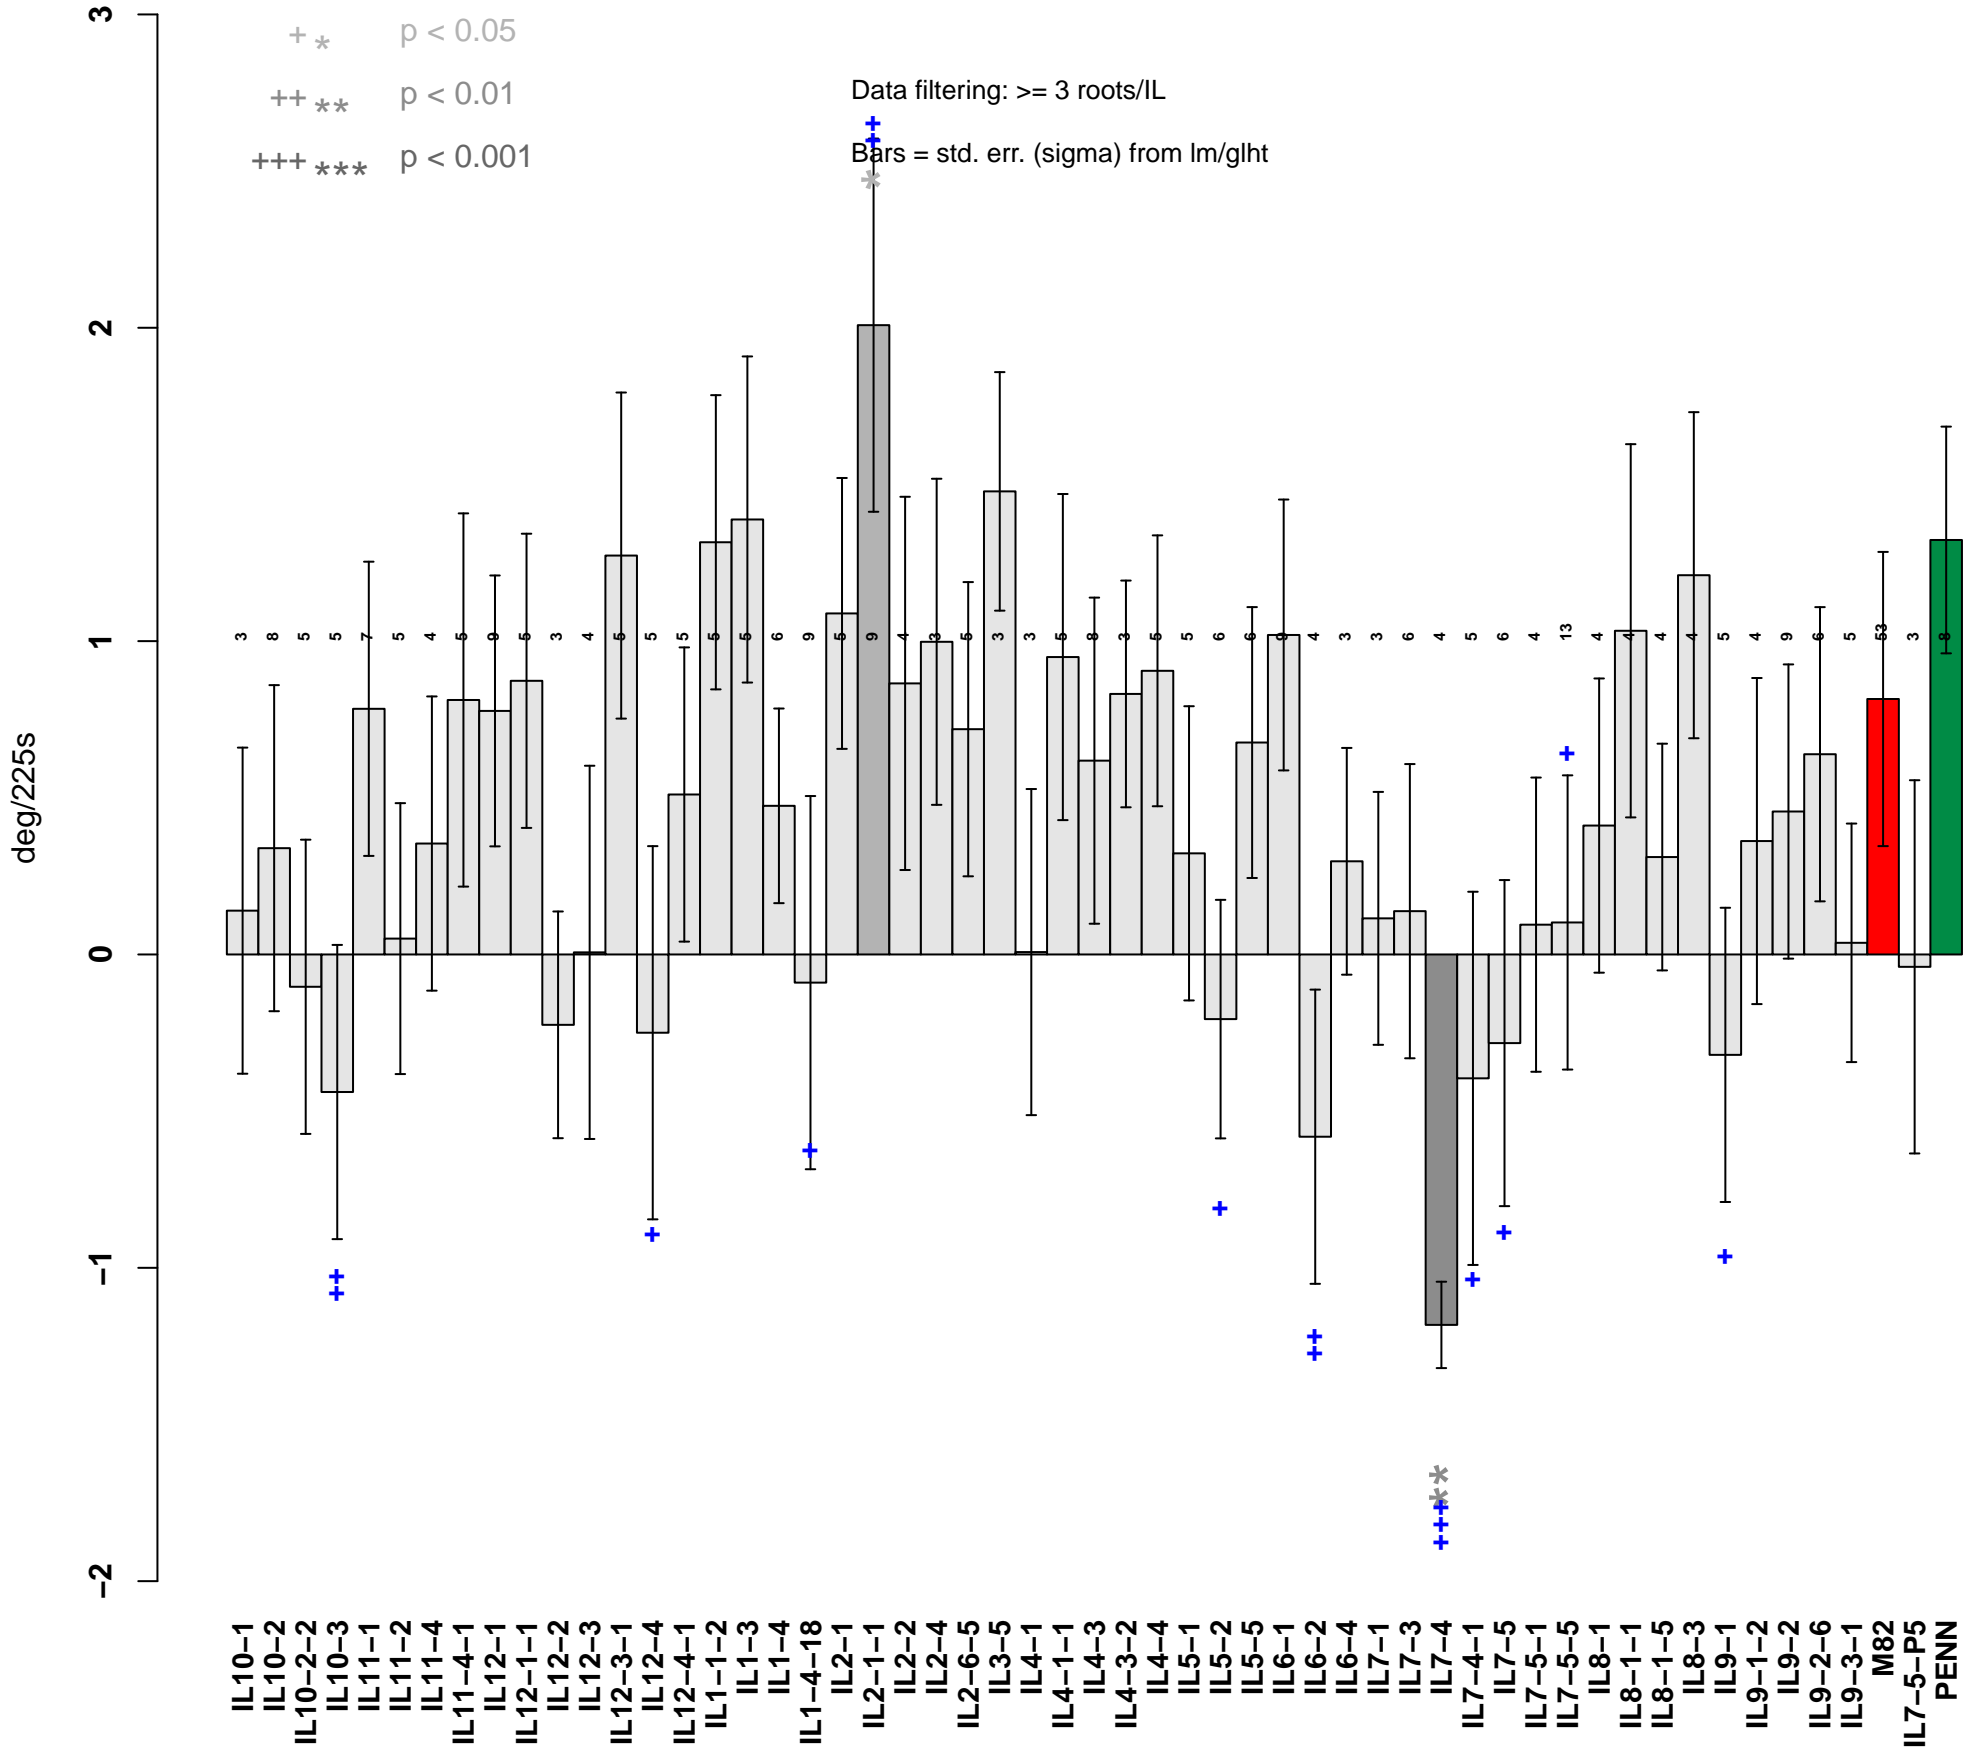

# Angle Rate Away T2

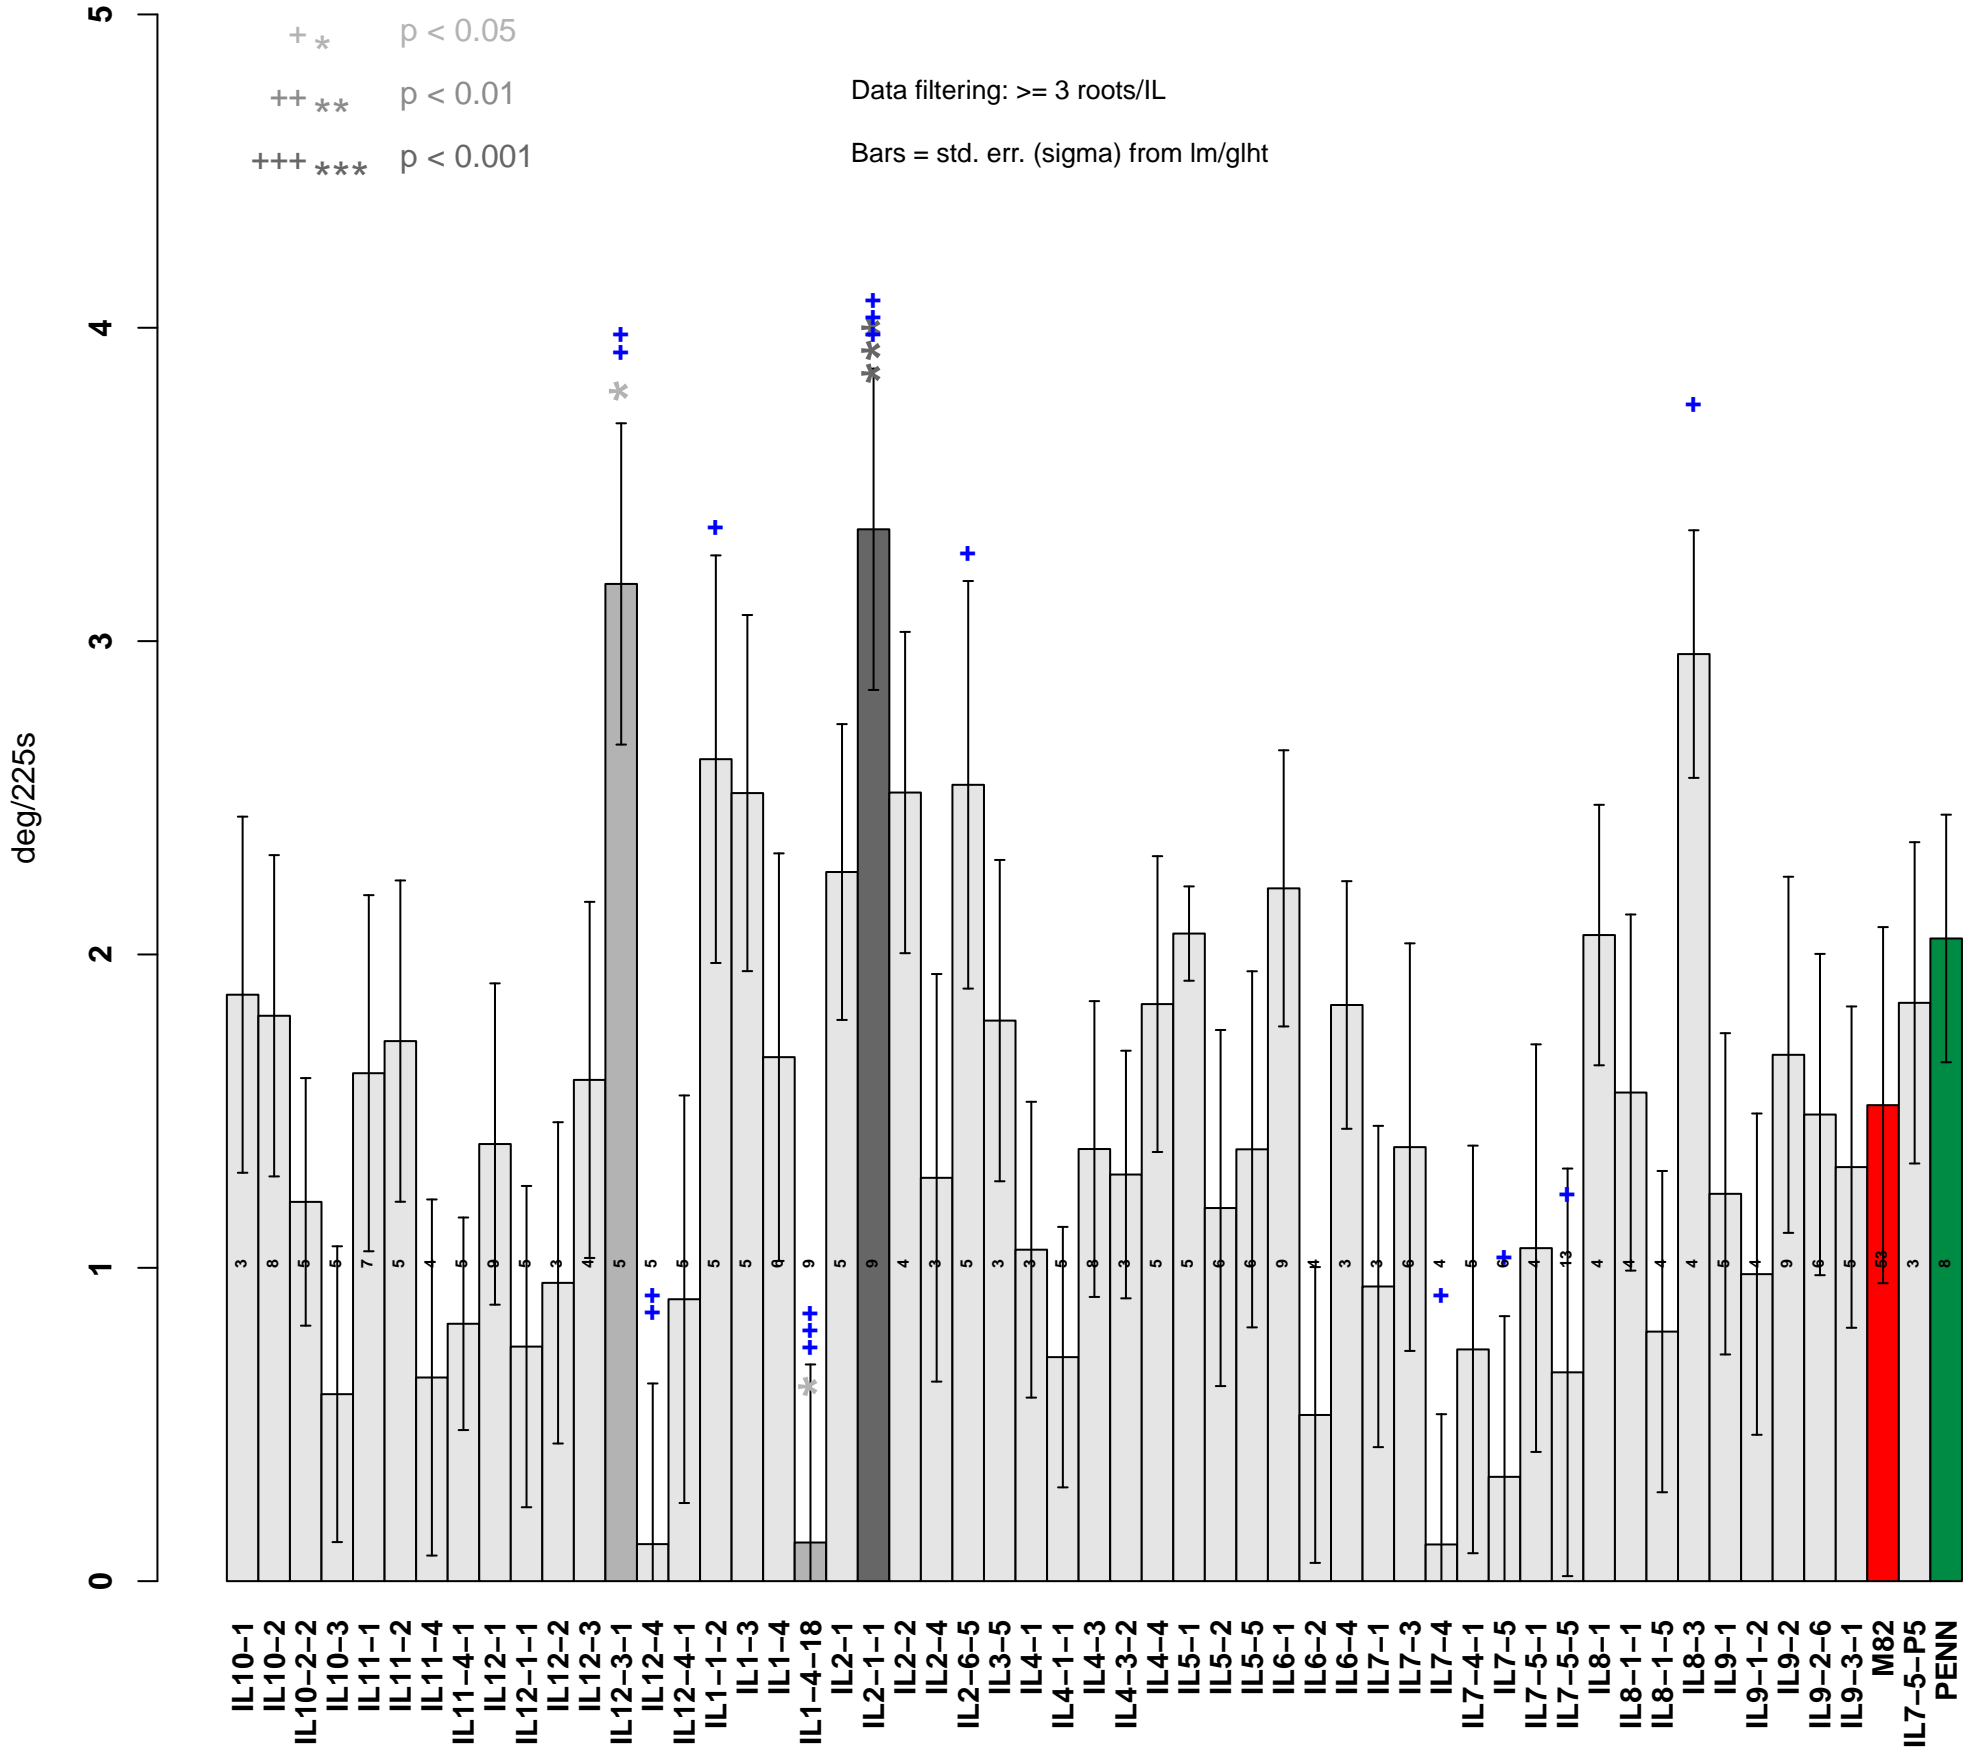

# Angle Rate Away T3

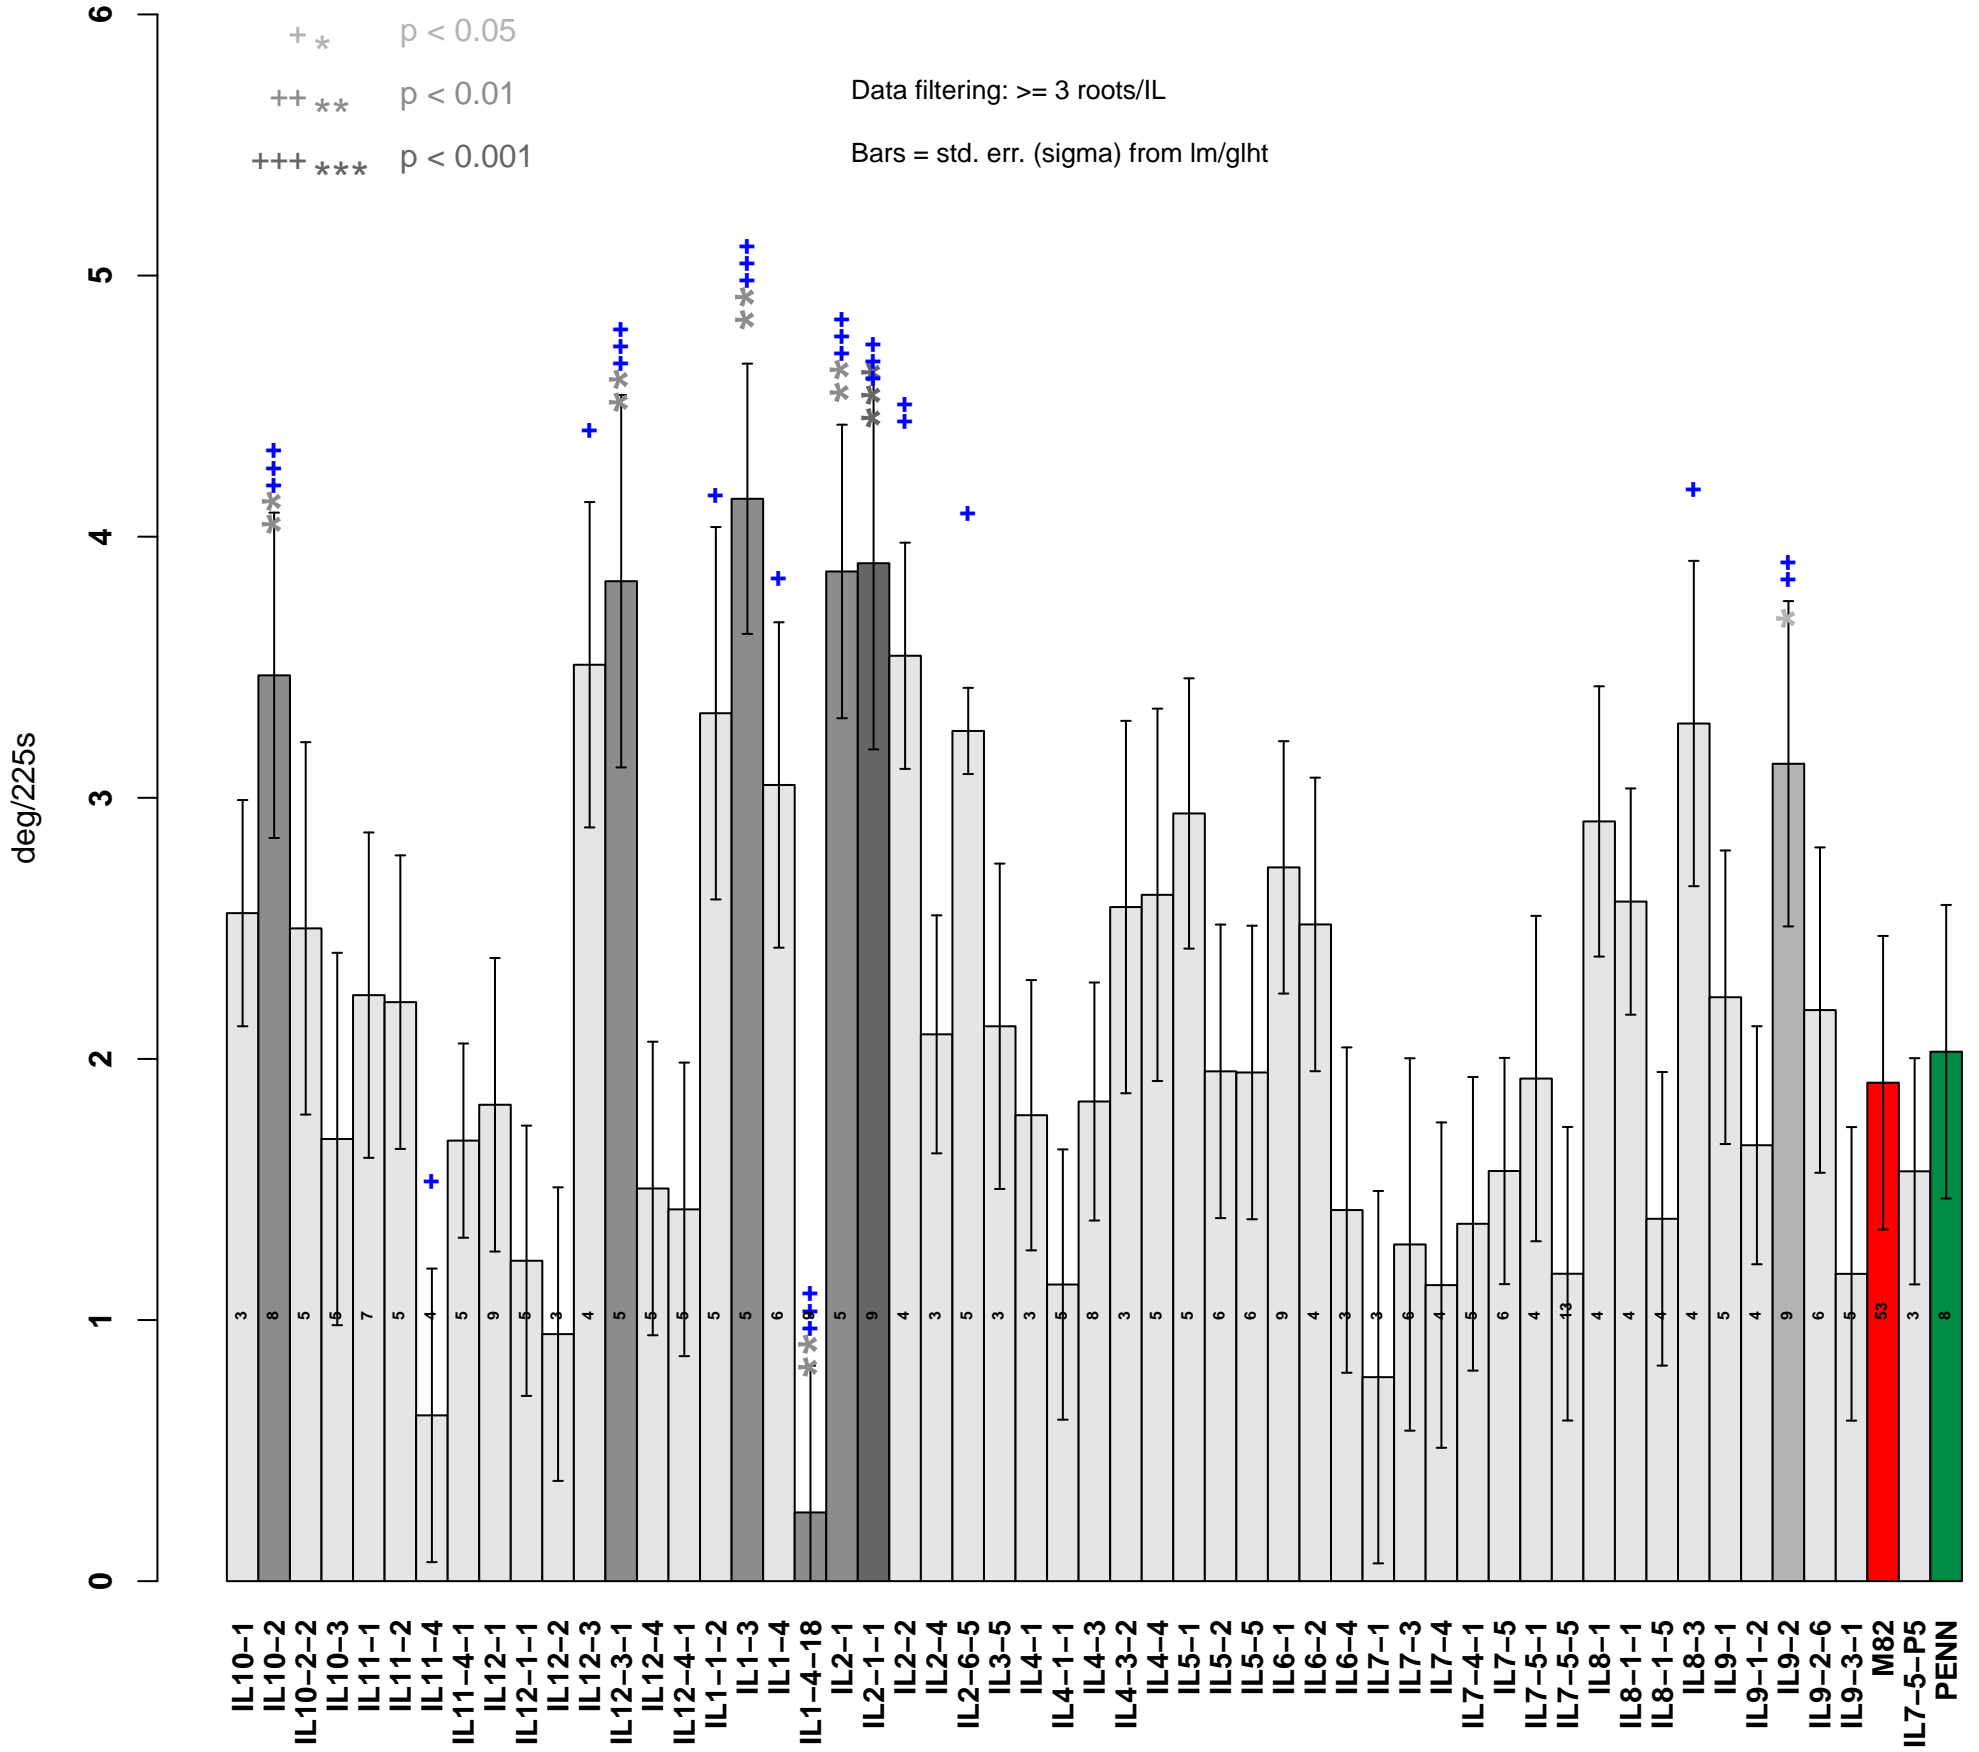

# Angle Rate Away T4

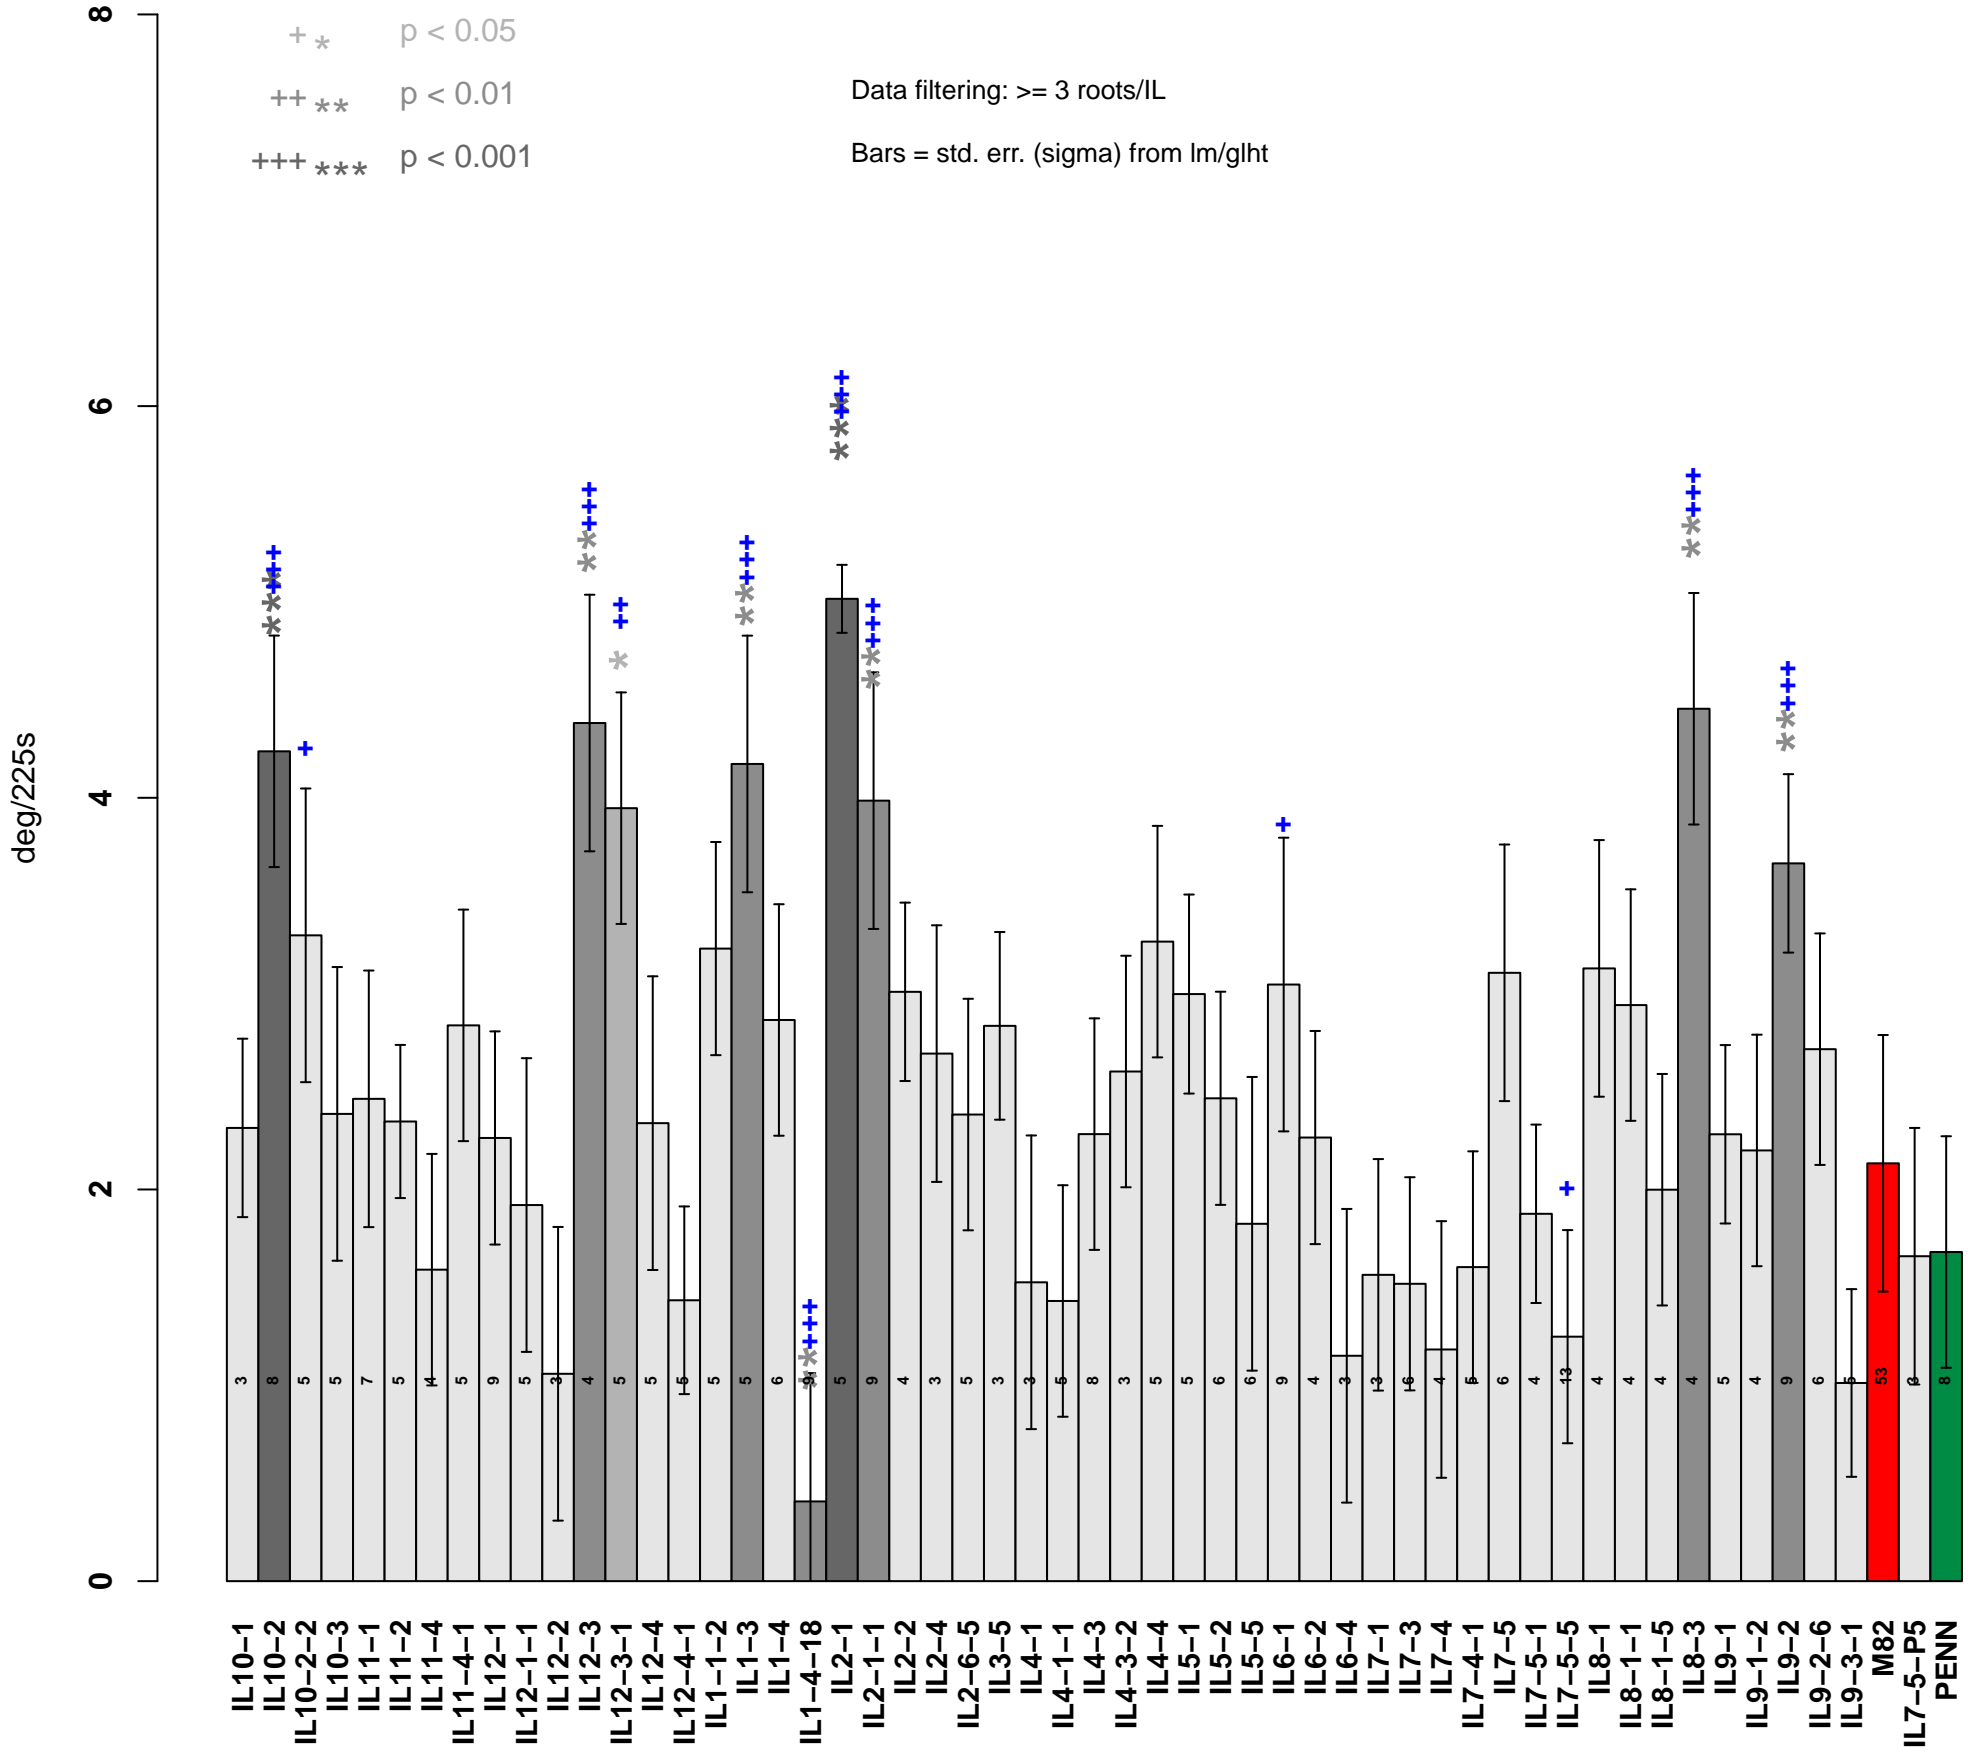

# Angle Rate Away T5

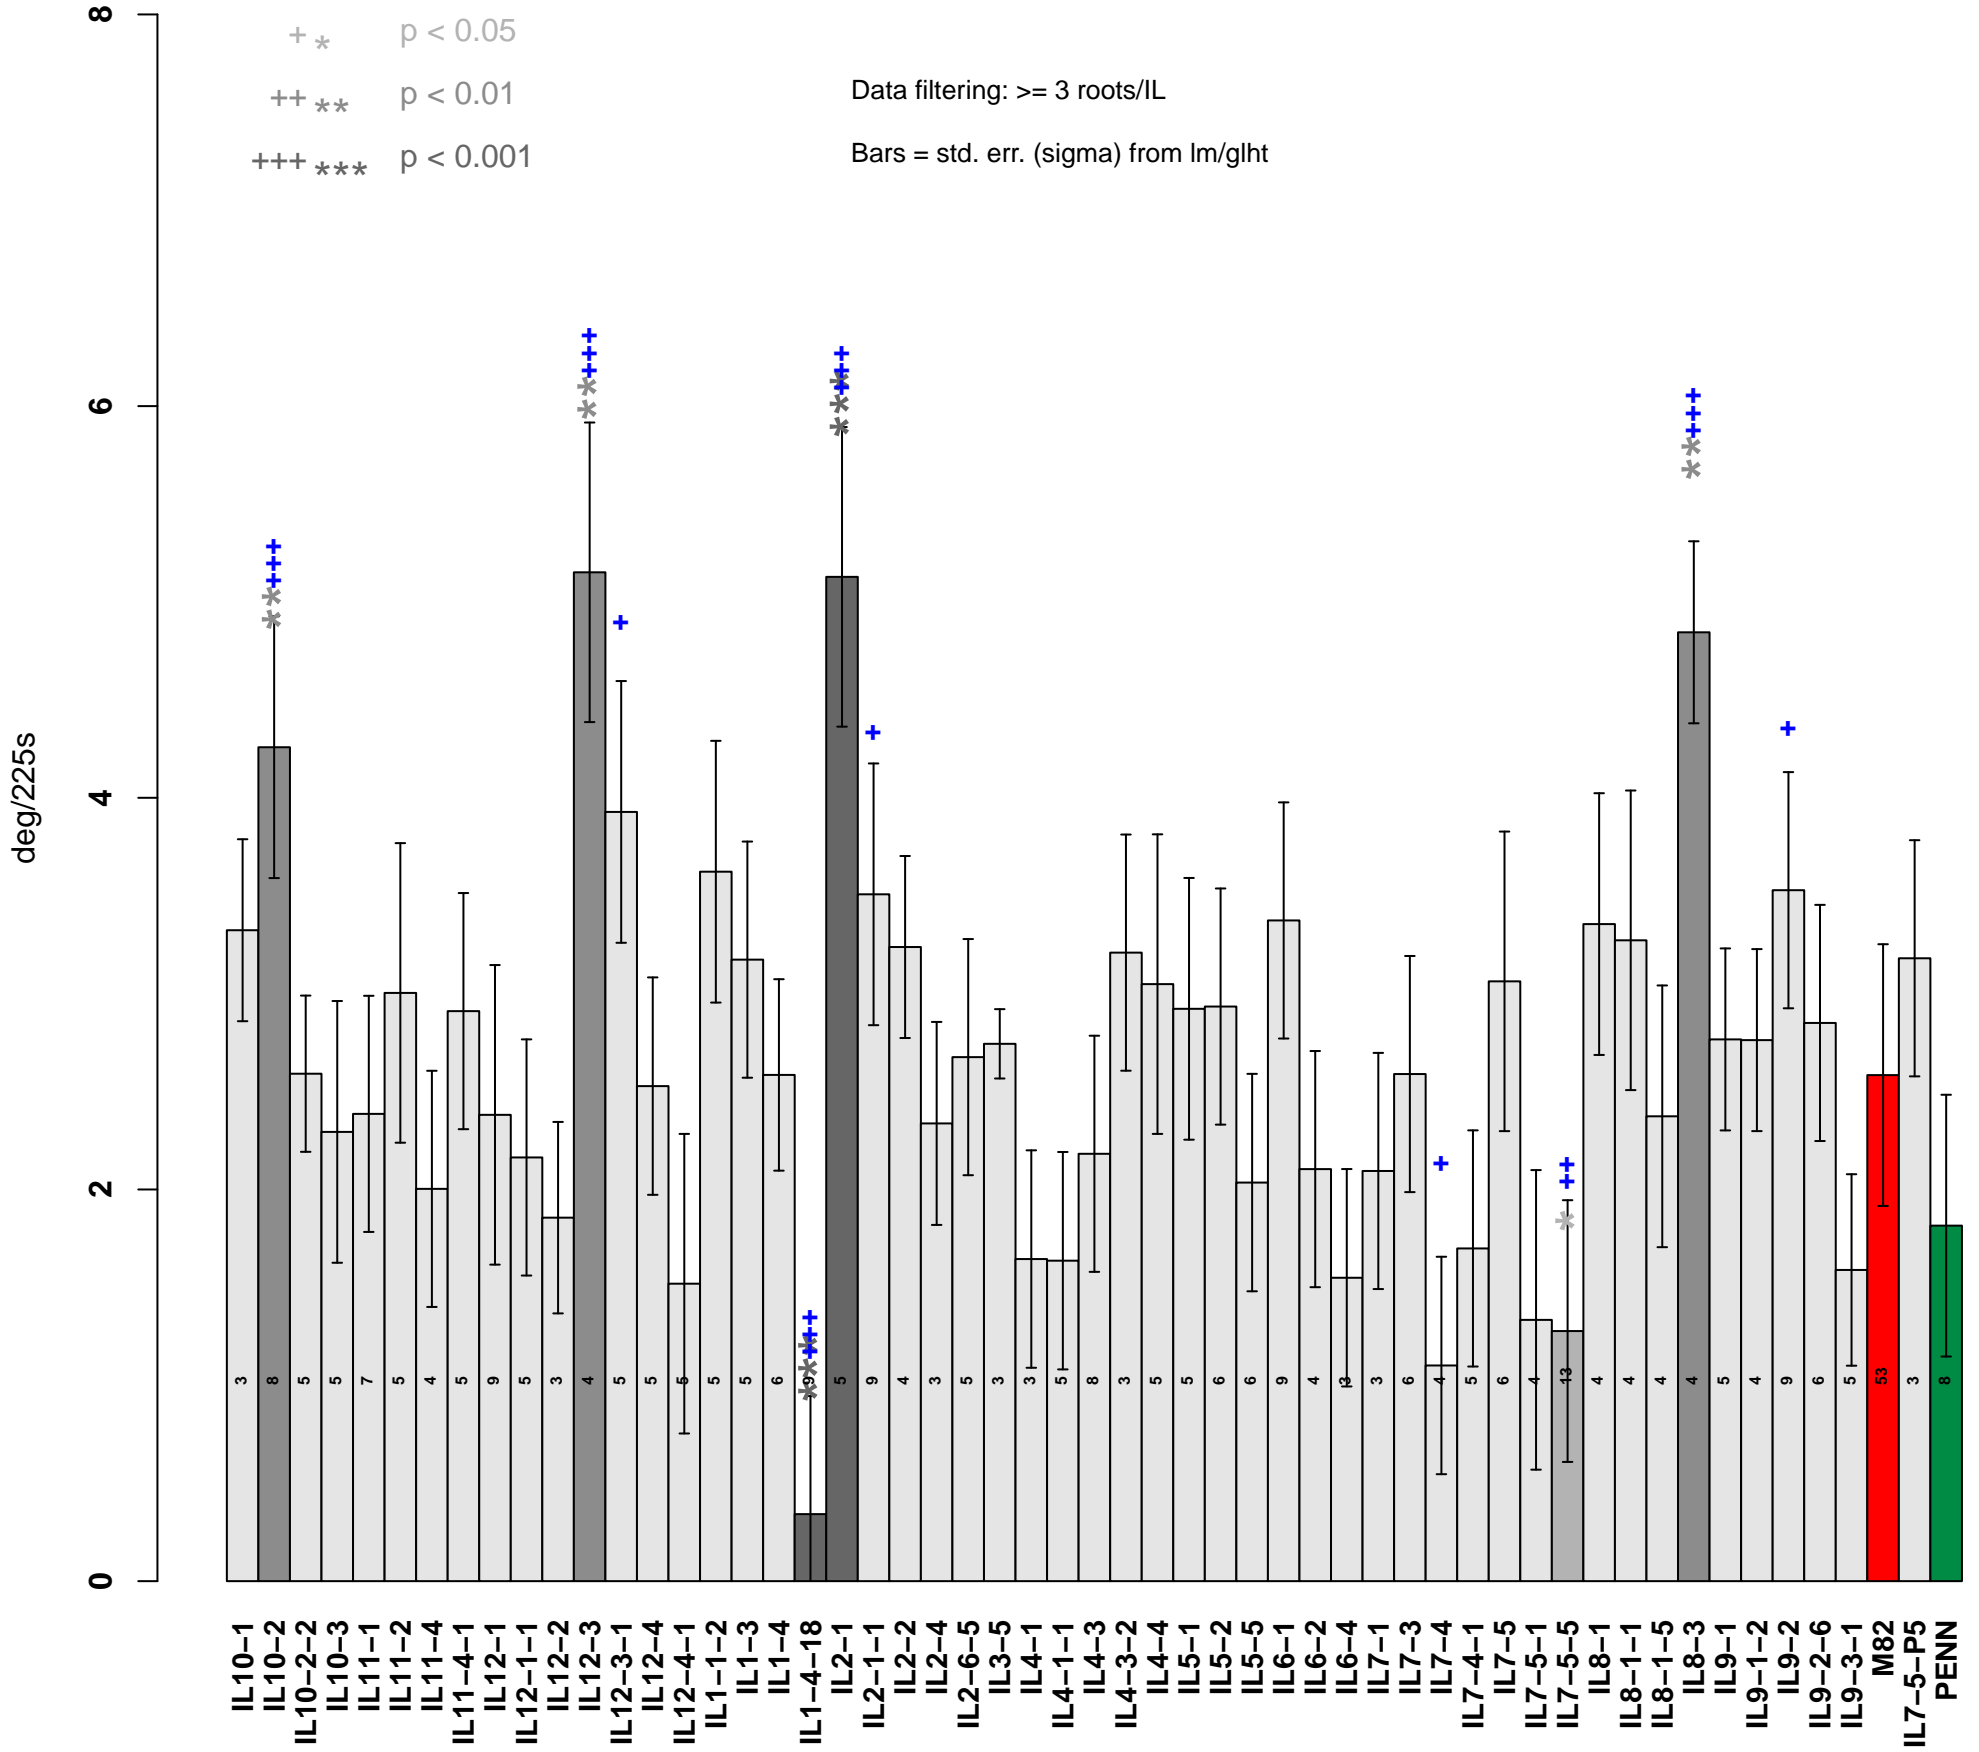

# Angle Rate Away T6

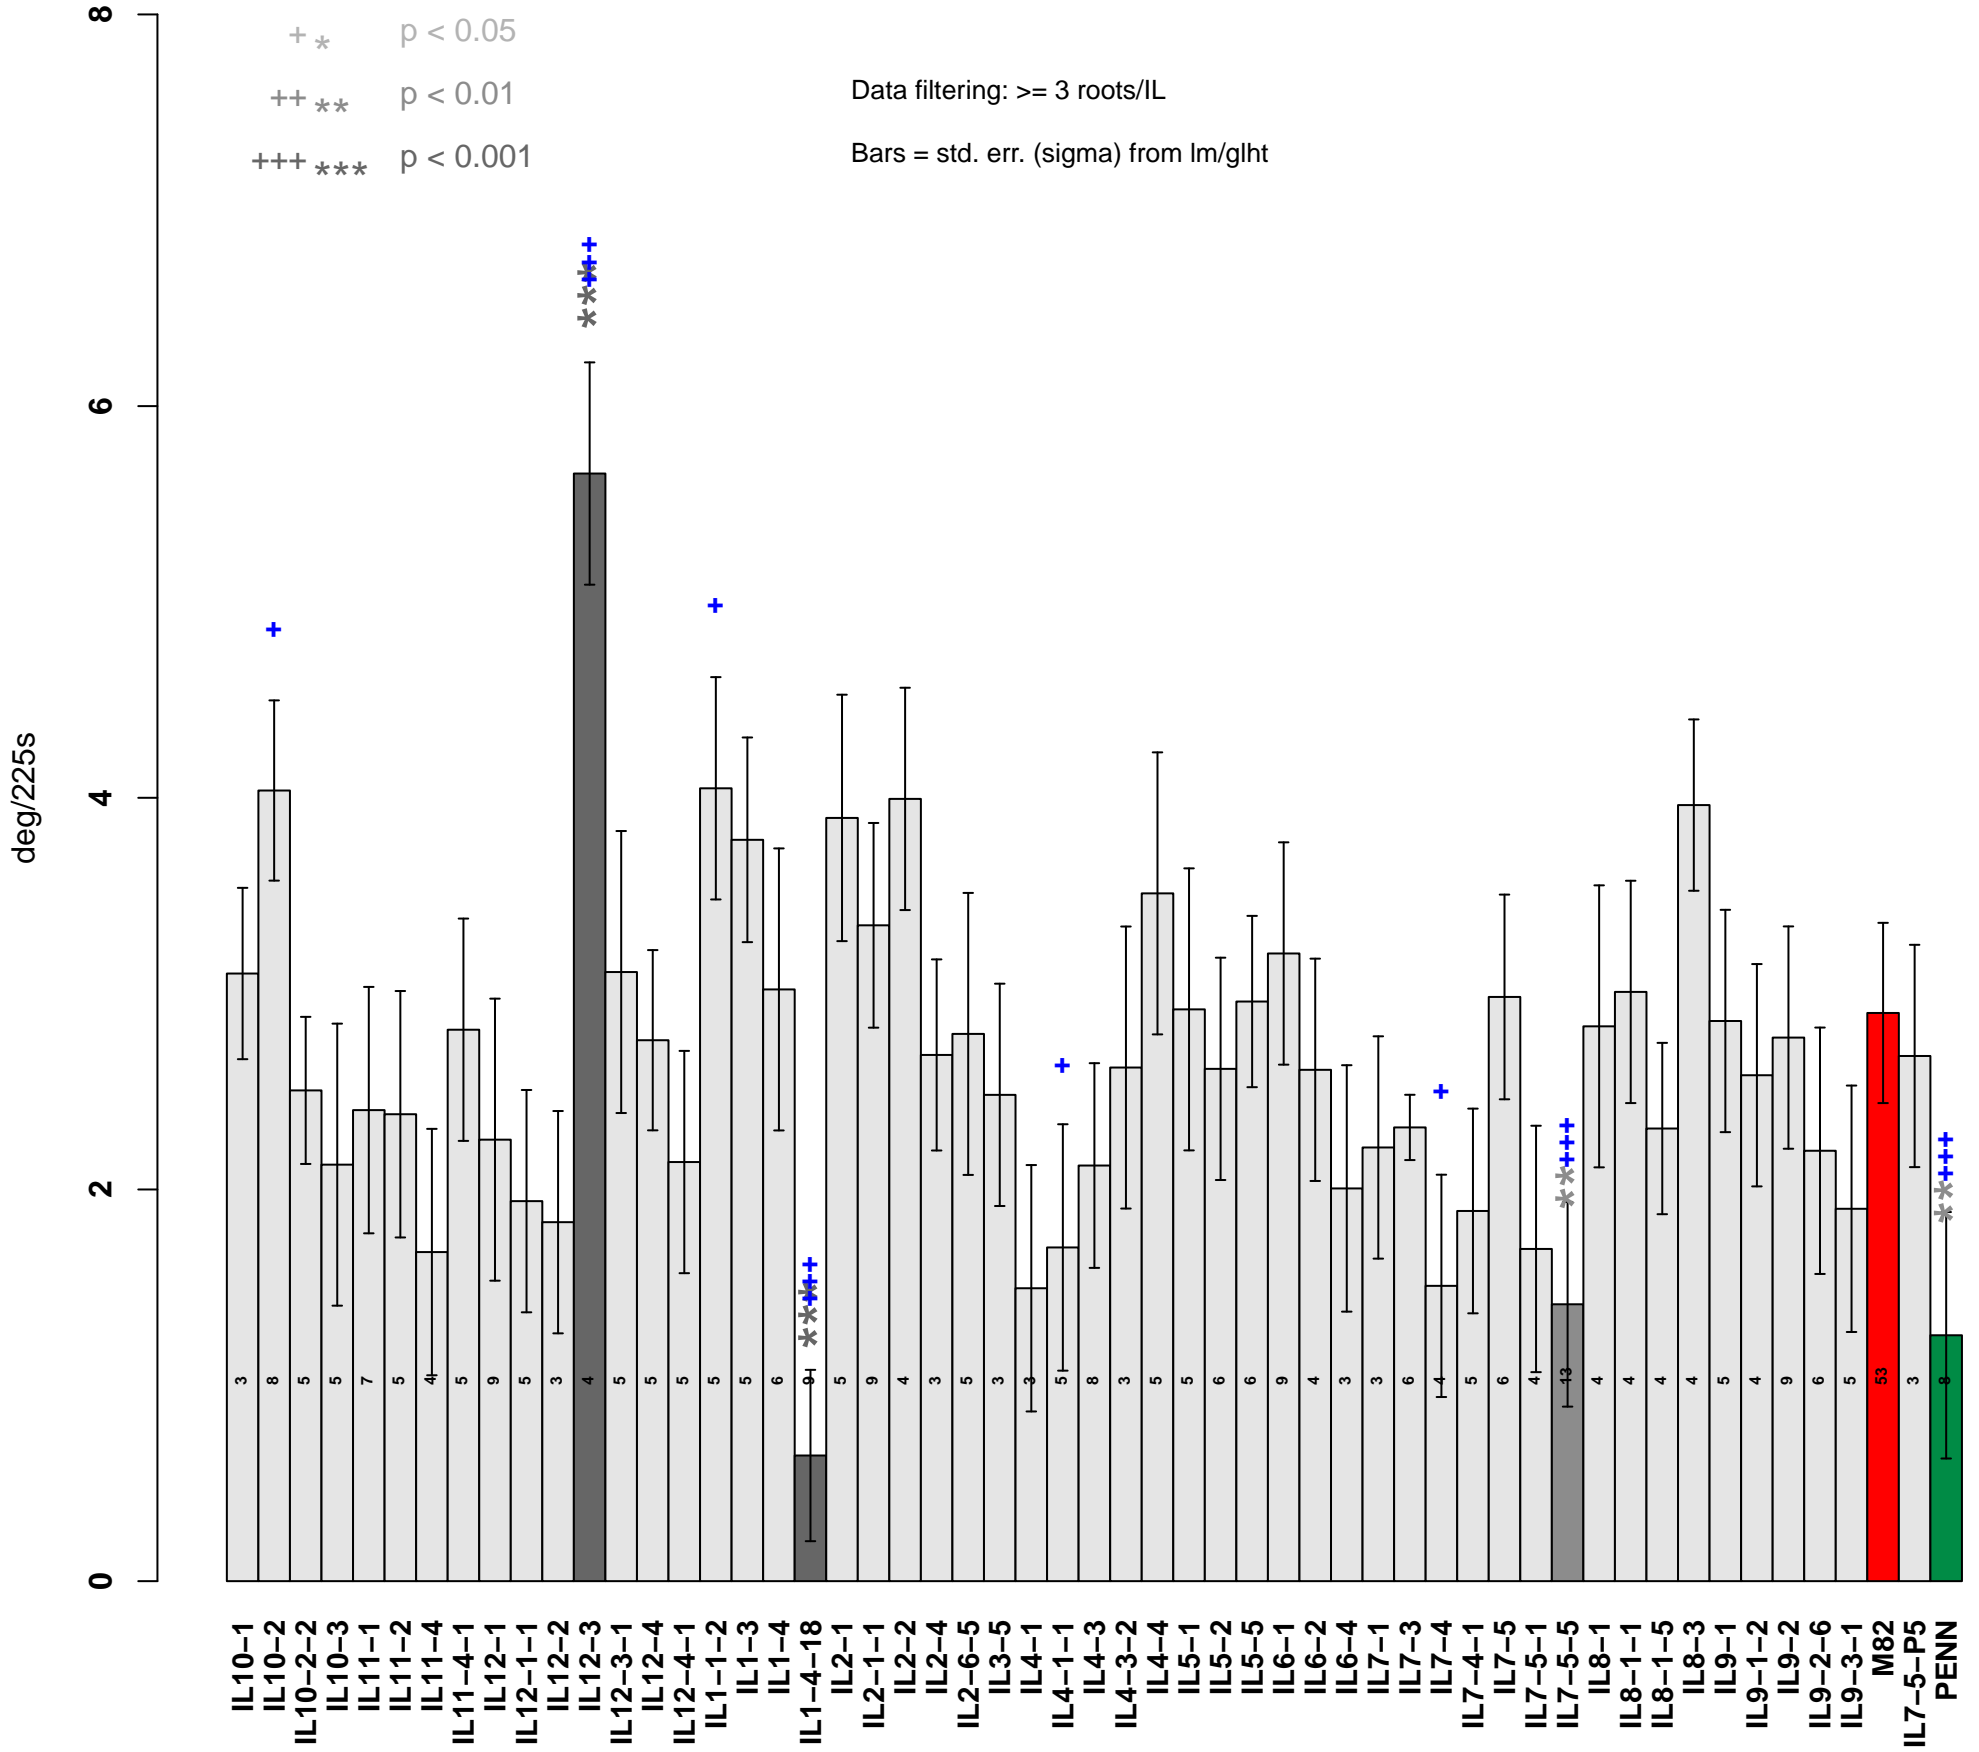

# Angle Rate Away T7

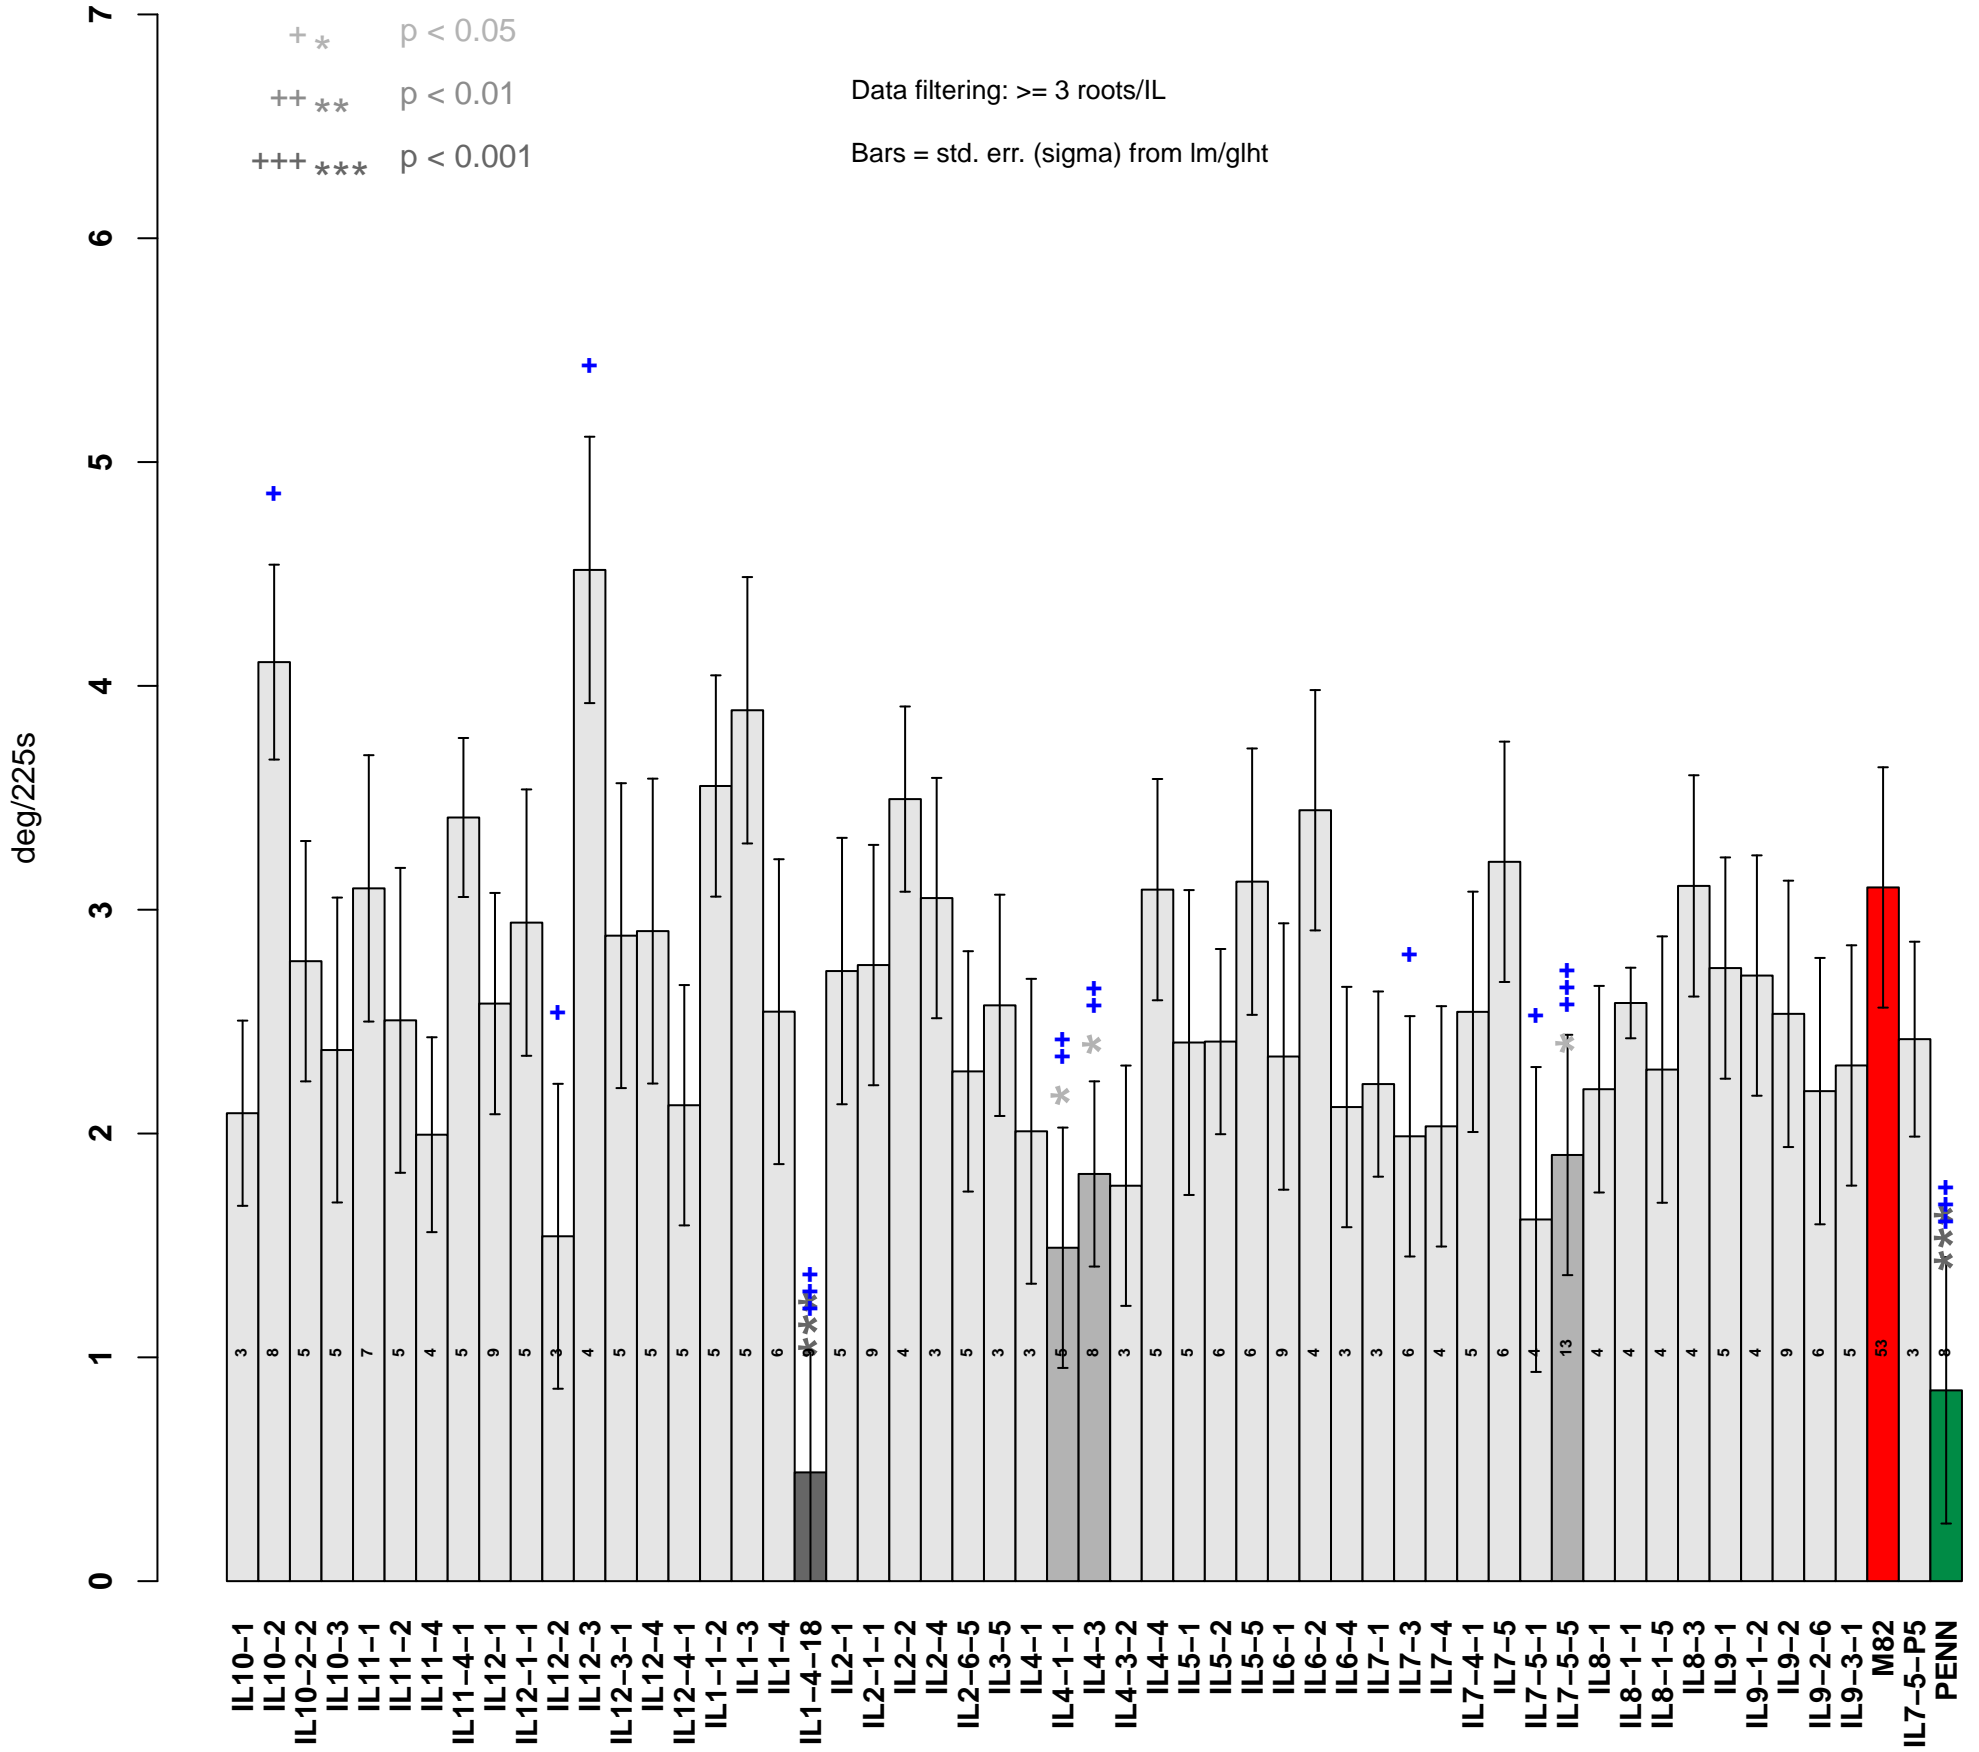



# Angle Rate Away T8

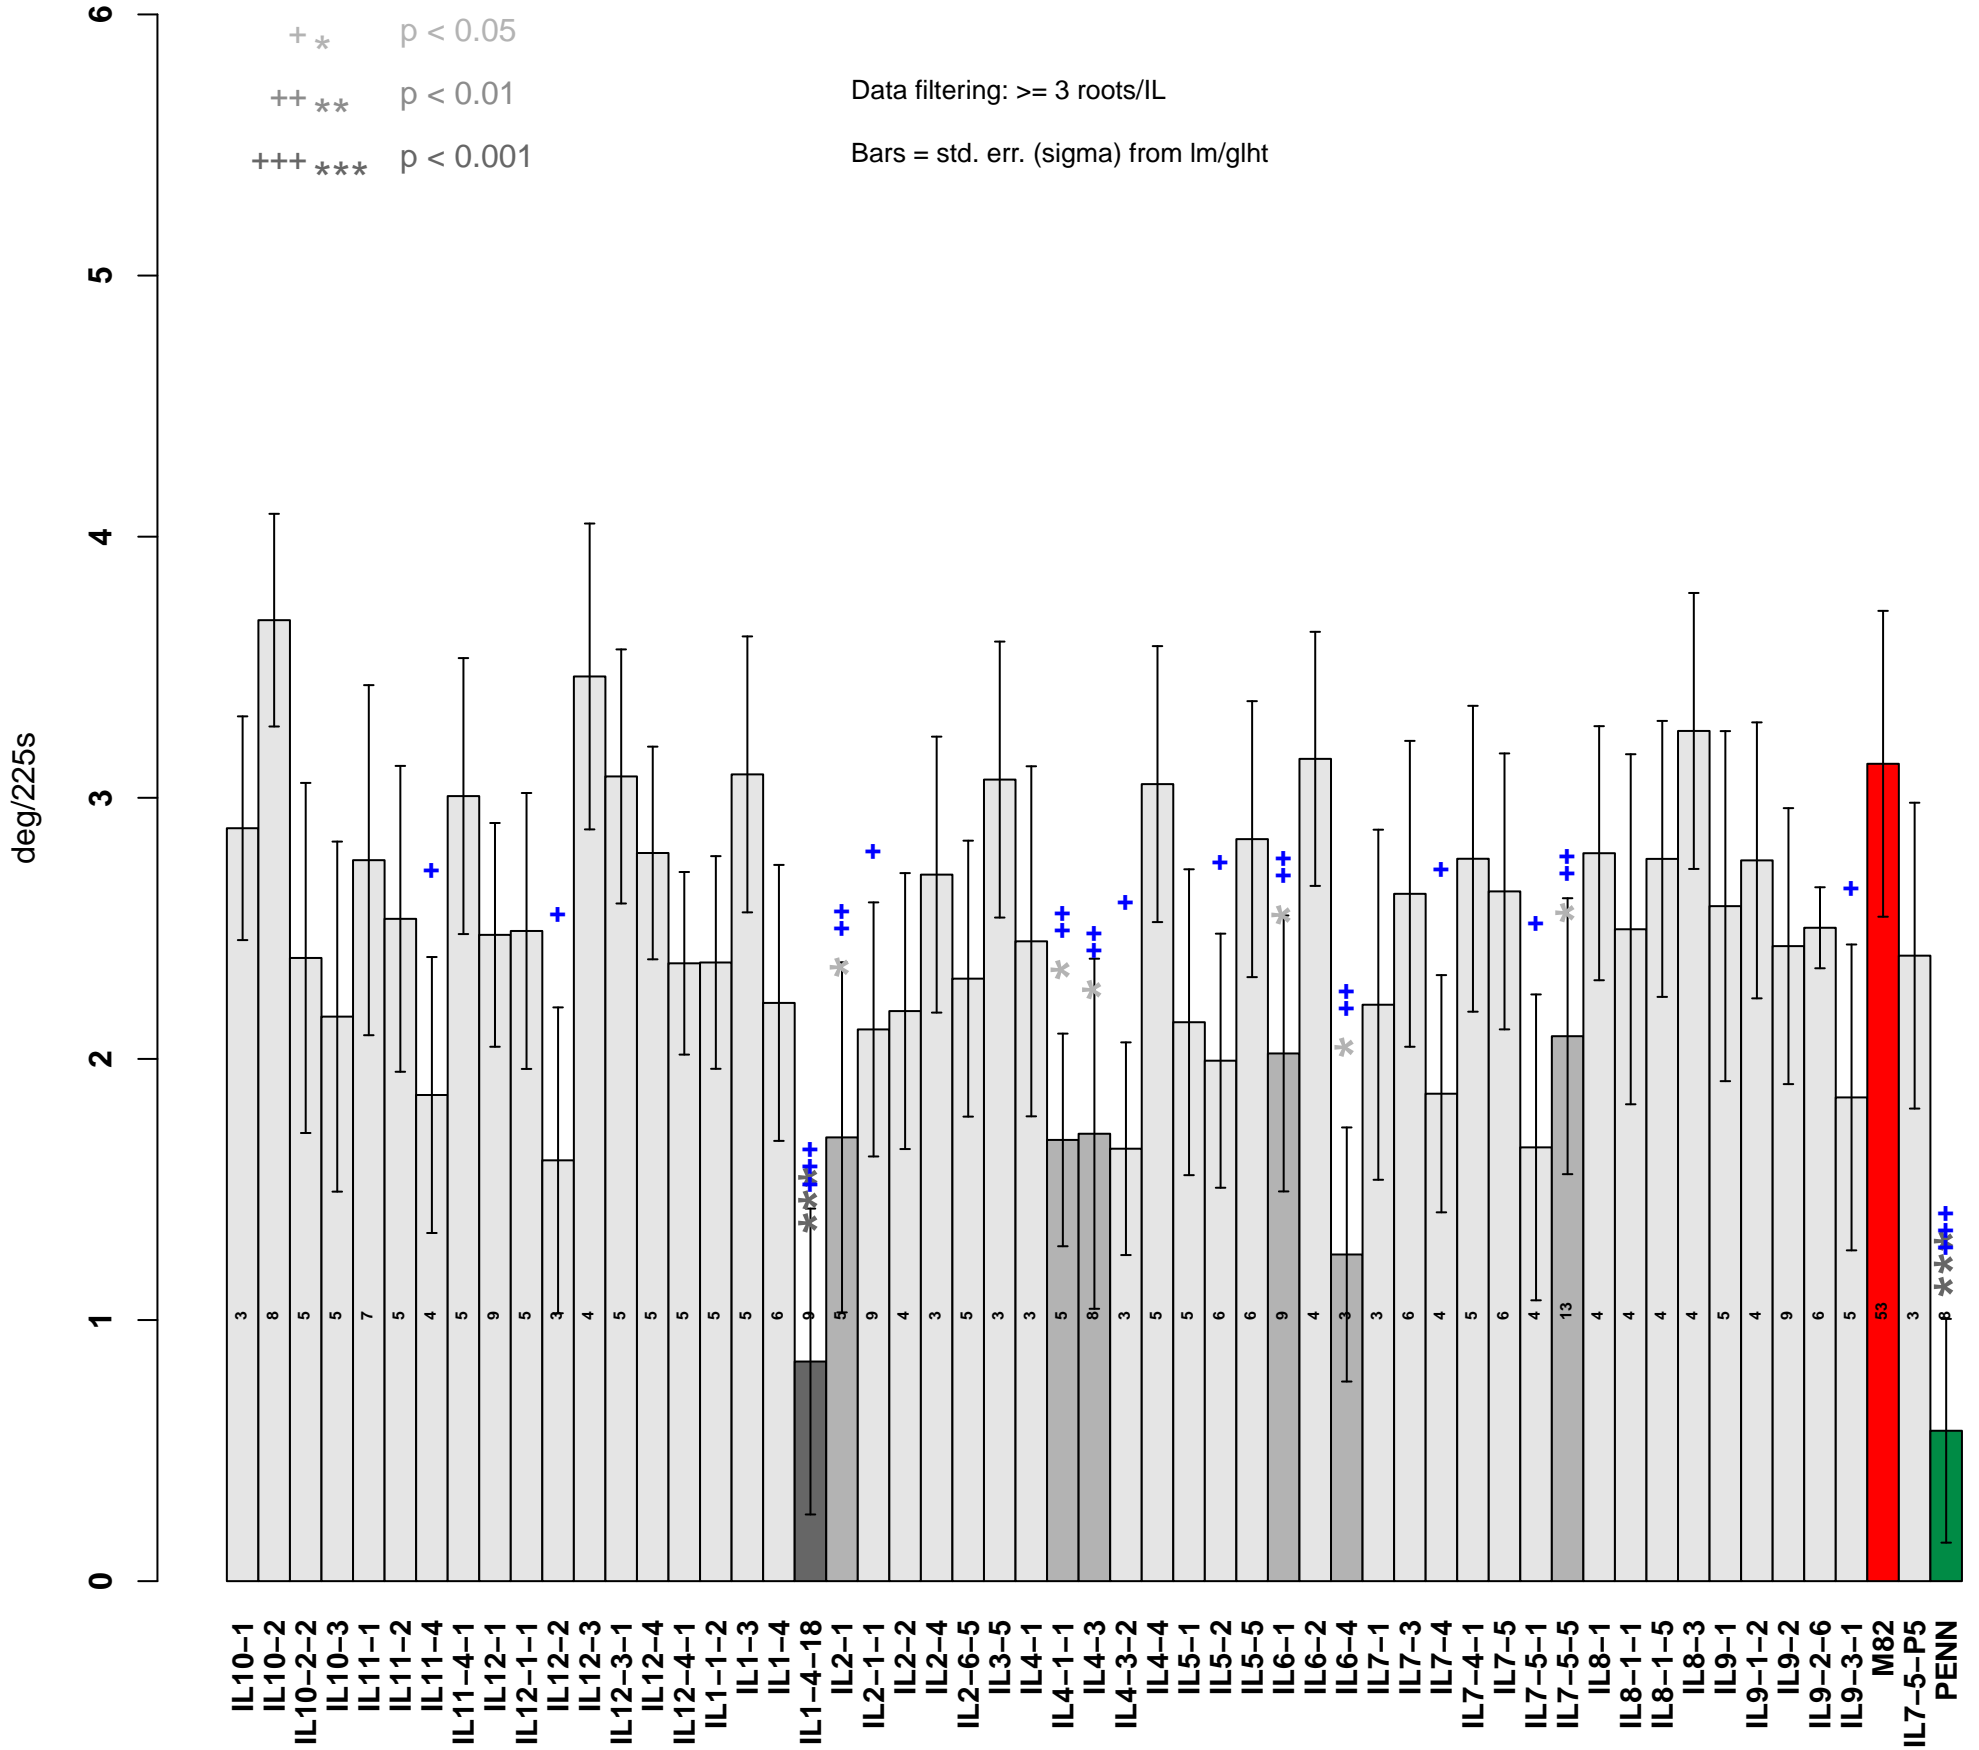

# Angle Rate Away T9

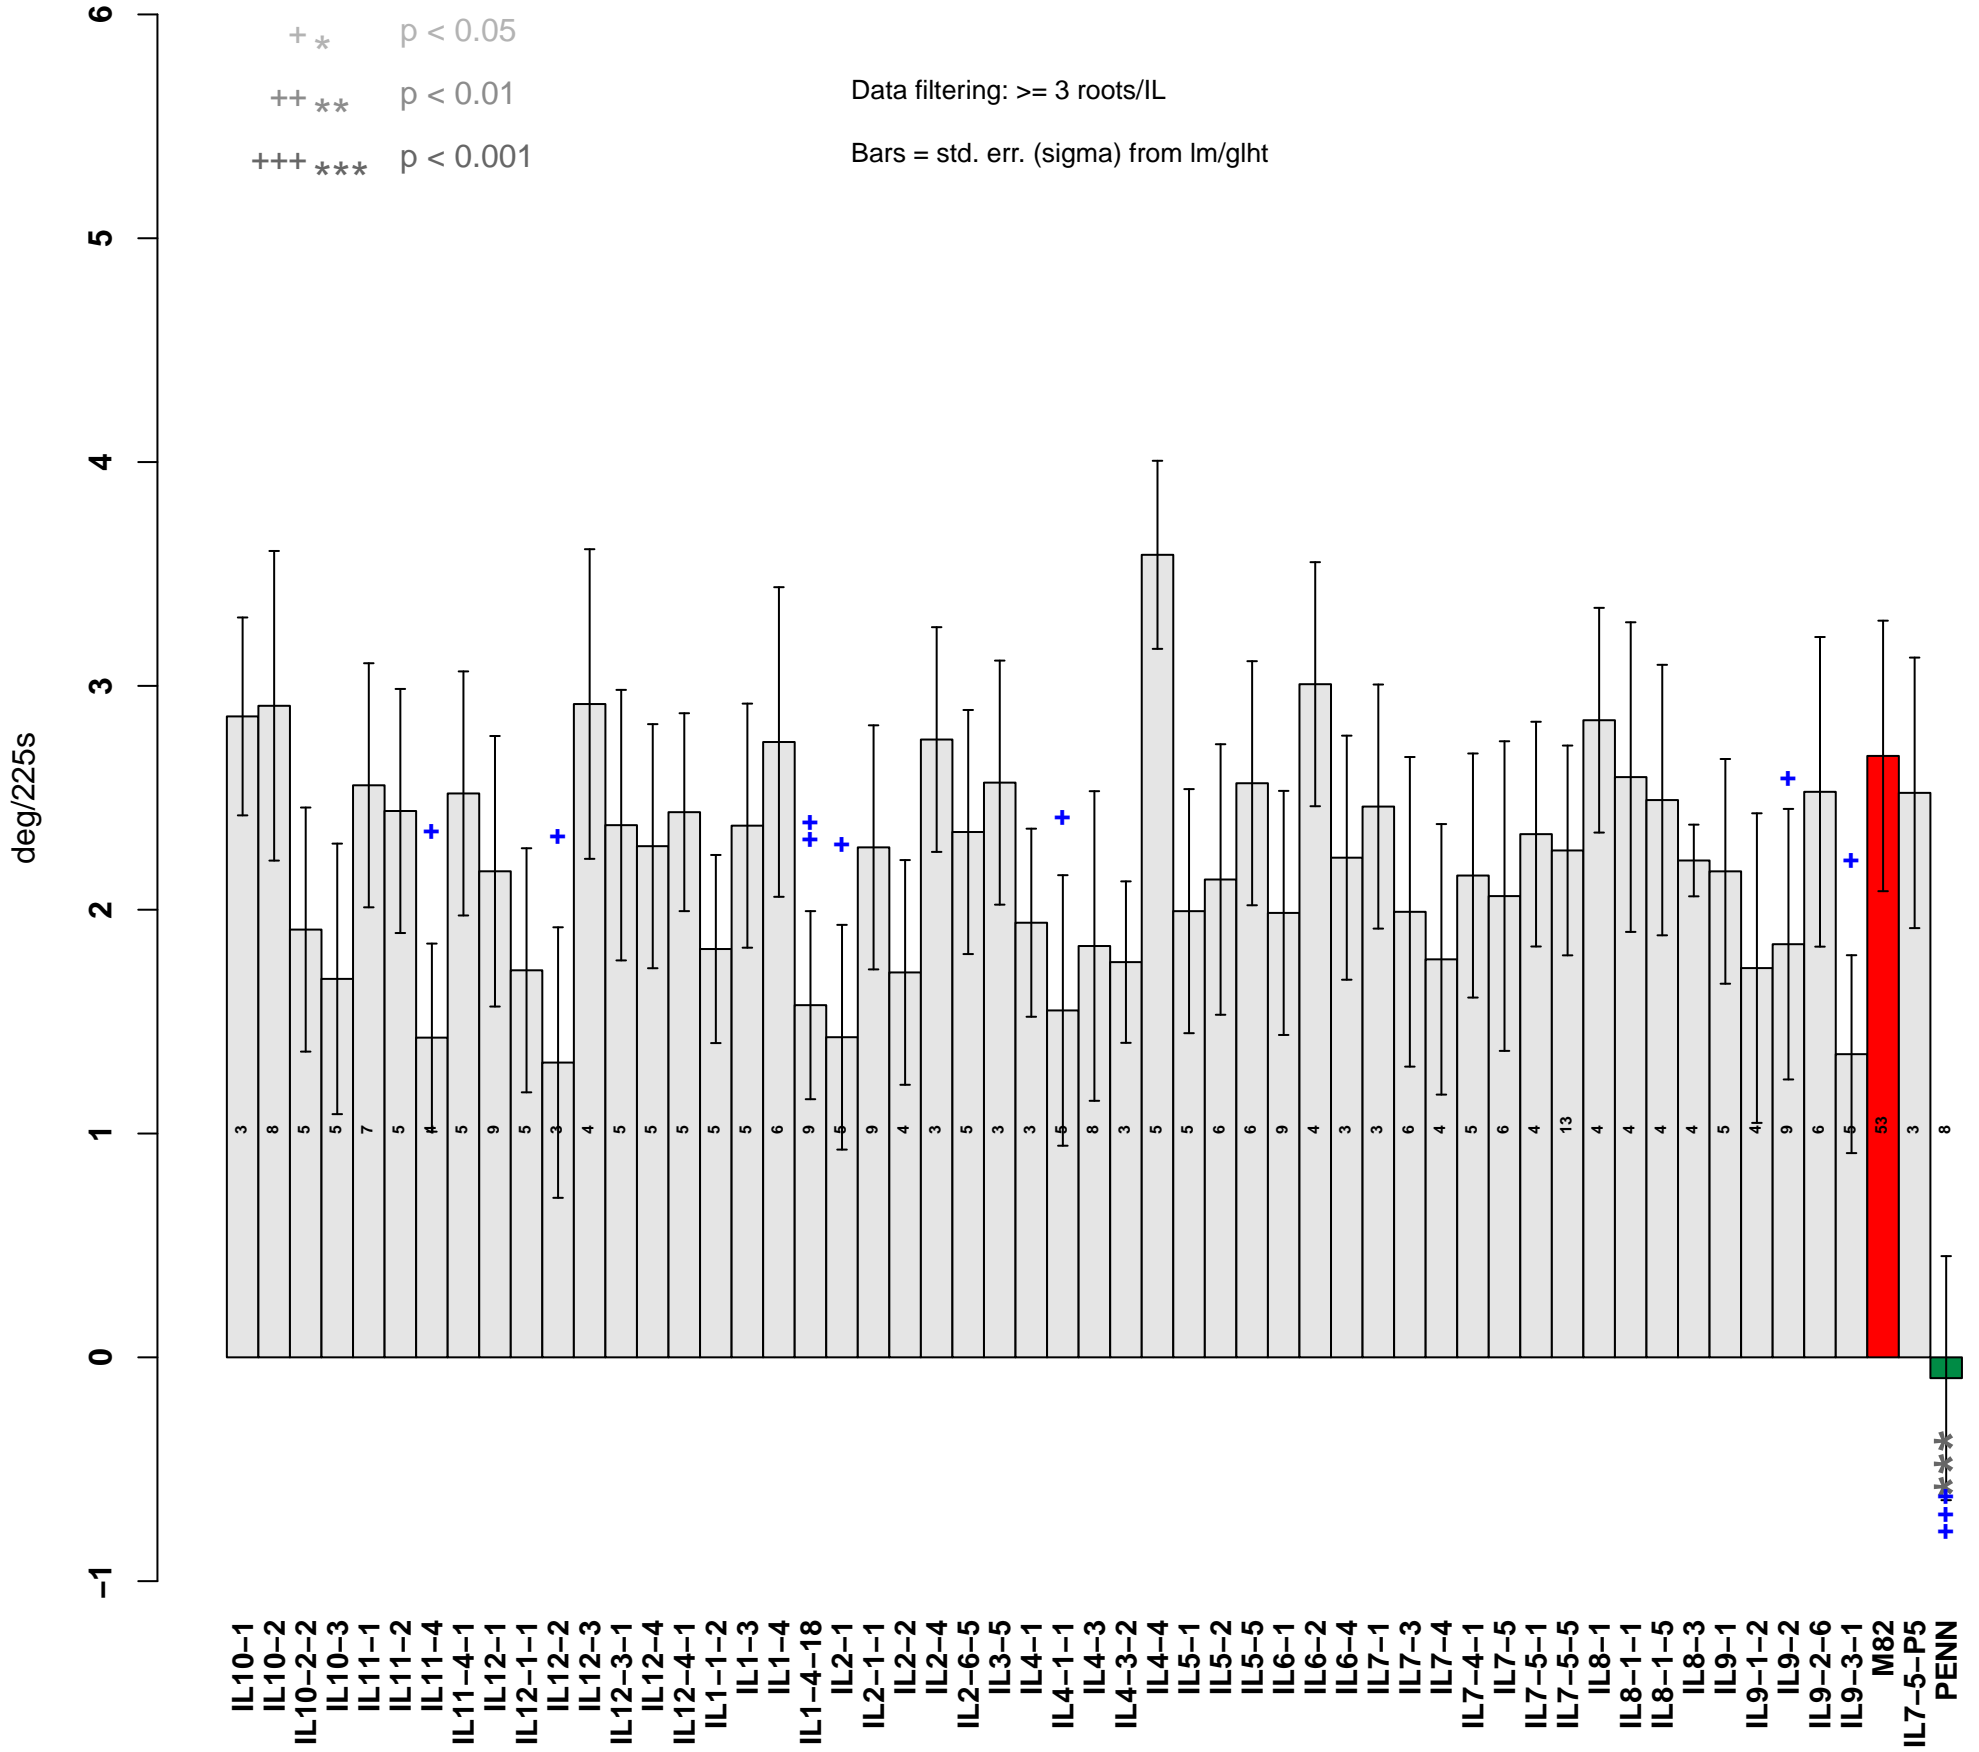

Angle Rate Away T10

+ \*    p < 0.05  
++ \*\*    p < 0.01  
+++ \*\*\*    p < 0.001

Data filtering: >= 3 roots/IL

Bars = std. err. (sigma) from lm/glht

deg/225s

5  
4  
3  
2  
1  
0  
-1

IL10-1  
IL10-2  
IL10-2-2  
IL10-3  
IL11-1  
IL11-2  
IL11-4  
IL11-4-1  
IL12-1  
IL12-1-1  
IL12-2  
IL12-3  
IL12-3-1  
IL12-4  
IL12-4-1  
IL1-1-2  
IL1-3  
IL1-4  
IL1-4-18  
IL2-1  
IL2-1-1  
IL2-2  
IL2-4  
IL2-6-5  
IL3-5  
IL4-1  
IL4-1-1  
IL4-3  
IL4-3-2  
IL4-4  
IL5-1  
IL5-2  
IL5-5  
IL6-1  
IL6-2  
IL6-4  
IL7-1  
IL7-3  
IL7-4  
IL7-4-1  
IL7-5  
IL7-5-1  
IL7-5-5  
IL8-1  
IL8-1-1  
IL8-1-5  
IL8-3  
IL9-1  
IL9-1-2  
IL9-2  
IL9-2-6  
IL9-3-1  
M82  
IL7-5-P5  
PENN

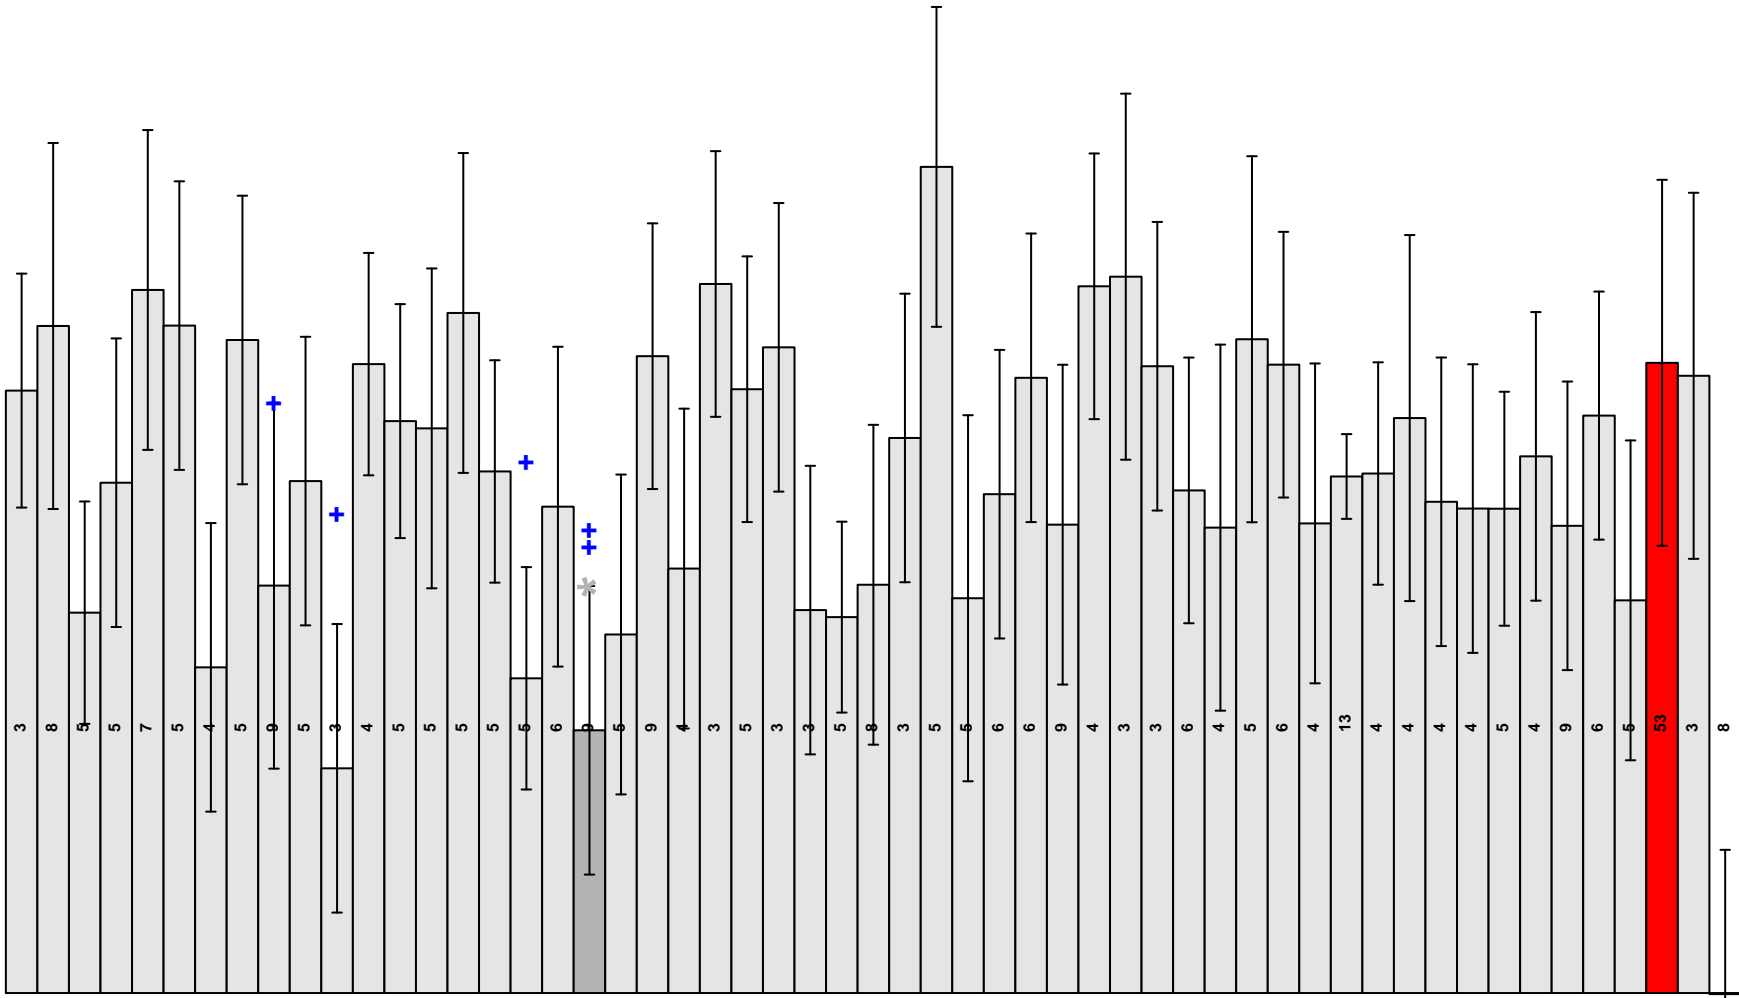



Angle Rate Away T12

+ \*      p < 0.05  
++ \*\*    p < 0.01  
+++ \*\*\*   p < 0.001

Data filtering: >= 3 roots/IL

Bars = std. err. (sigma) from lm/glht

deg/225s

-1      0      1      2      3      4      5

IL10-1  
IL10-2  
IL10-2-2  
IL10-3  
IL11-1  
IL11-2  
IL11-4  
IL11-4-1  
IL12-1  
IL12-1-1  
IL12-2  
IL12-3  
IL12-3-1  
IL12-4  
IL12-4-1  
IL1-1-2  
IL1-3  
IL1-4  
IL1-4-18  
IL2-1  
IL2-1-1  
IL2-2  
IL2-4  
IL2-6-5  
IL3-5  
IL4-1  
IL4-1-1  
IL4-3  
IL4-3-2  
IL4-4  
IL5-1  
IL5-2  
IL5-5  
IL6-1  
IL6-2  
IL6-4  
IL7-1  
IL7-3  
IL7-4  
IL7-4-1  
IL7-5  
IL7-5-1  
IL7-5-5  
IL8-1  
IL8-1-1  
IL8-1-5  
IL8-3  
IL9-1  
IL9-1-2  
IL9-2  
IL9-2-6  
IL9-3-1  
M82  
IL7-5-P5  
PENN

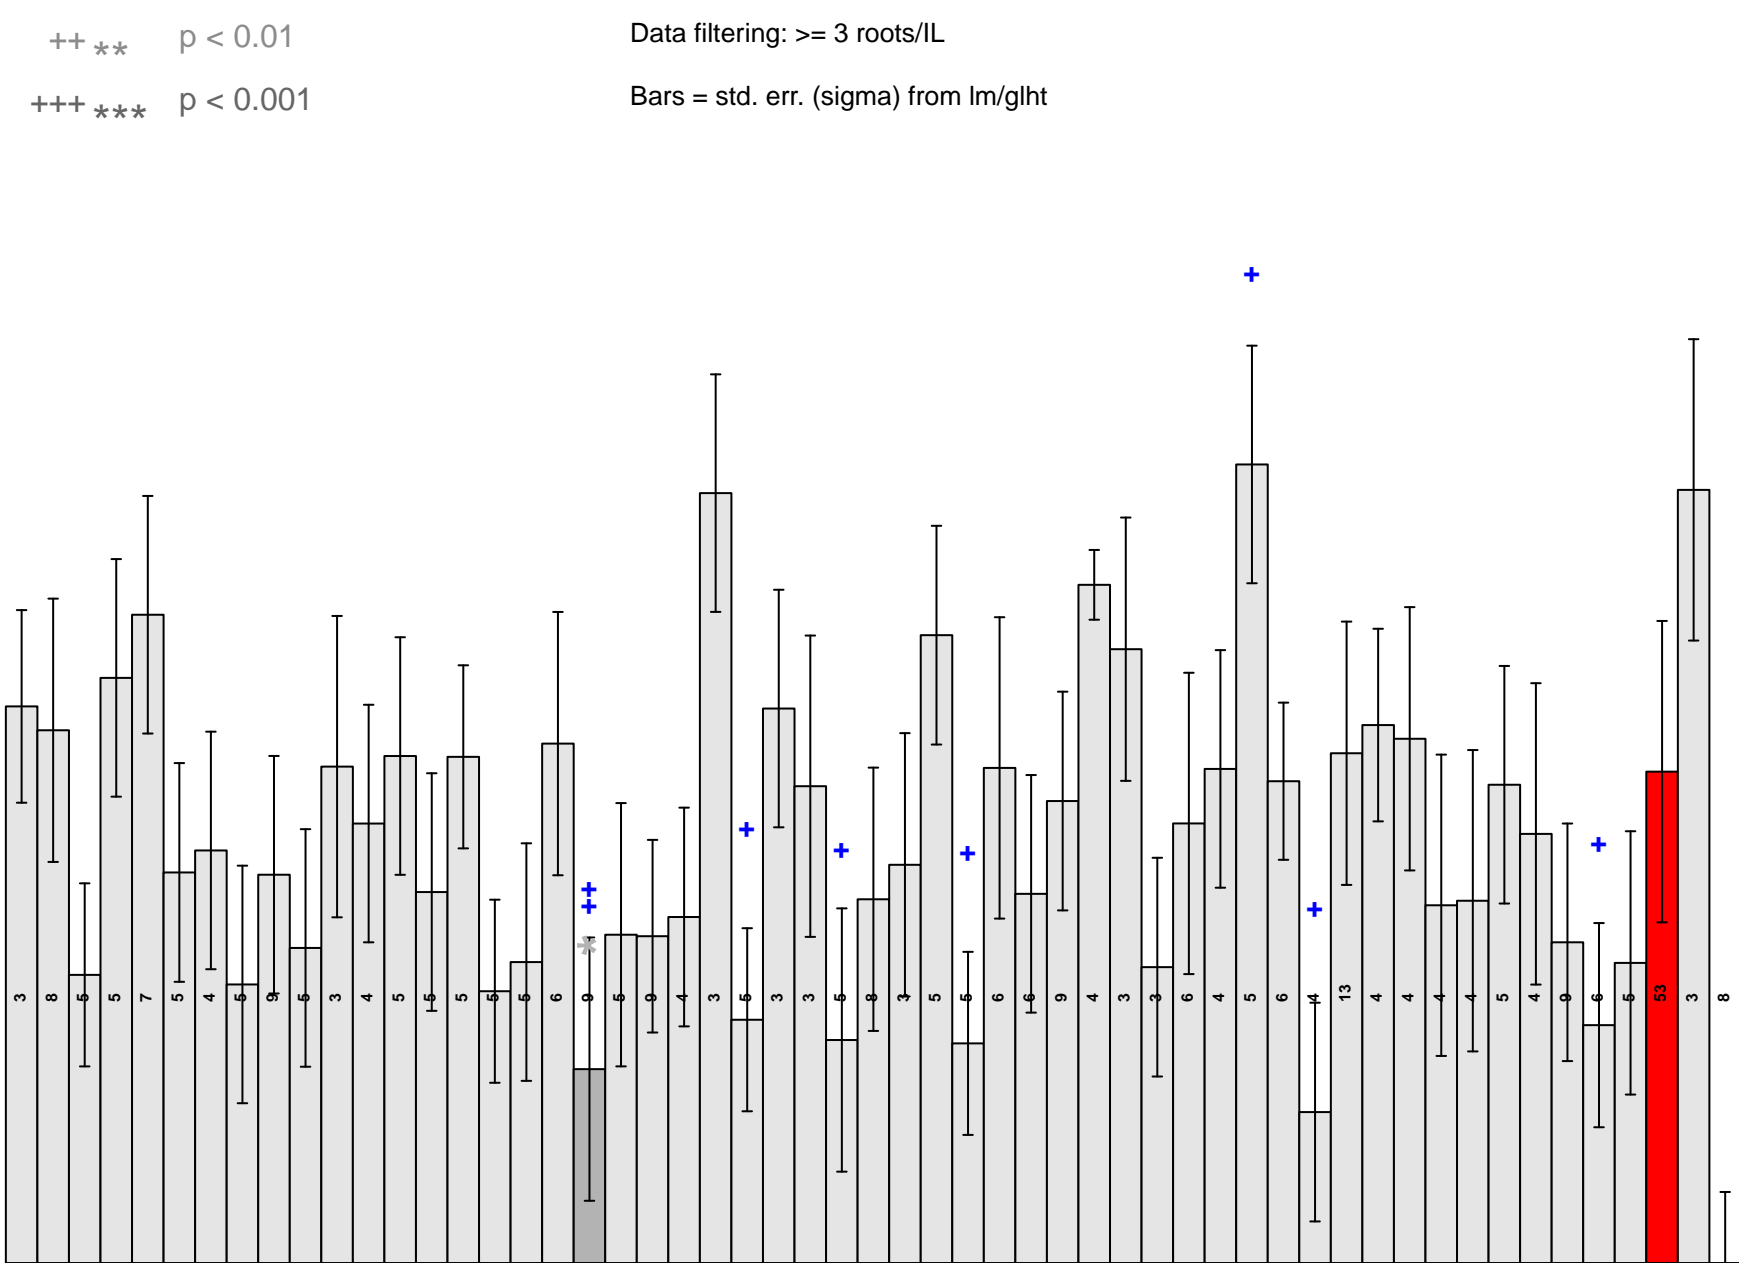

Angle Rate Away T13

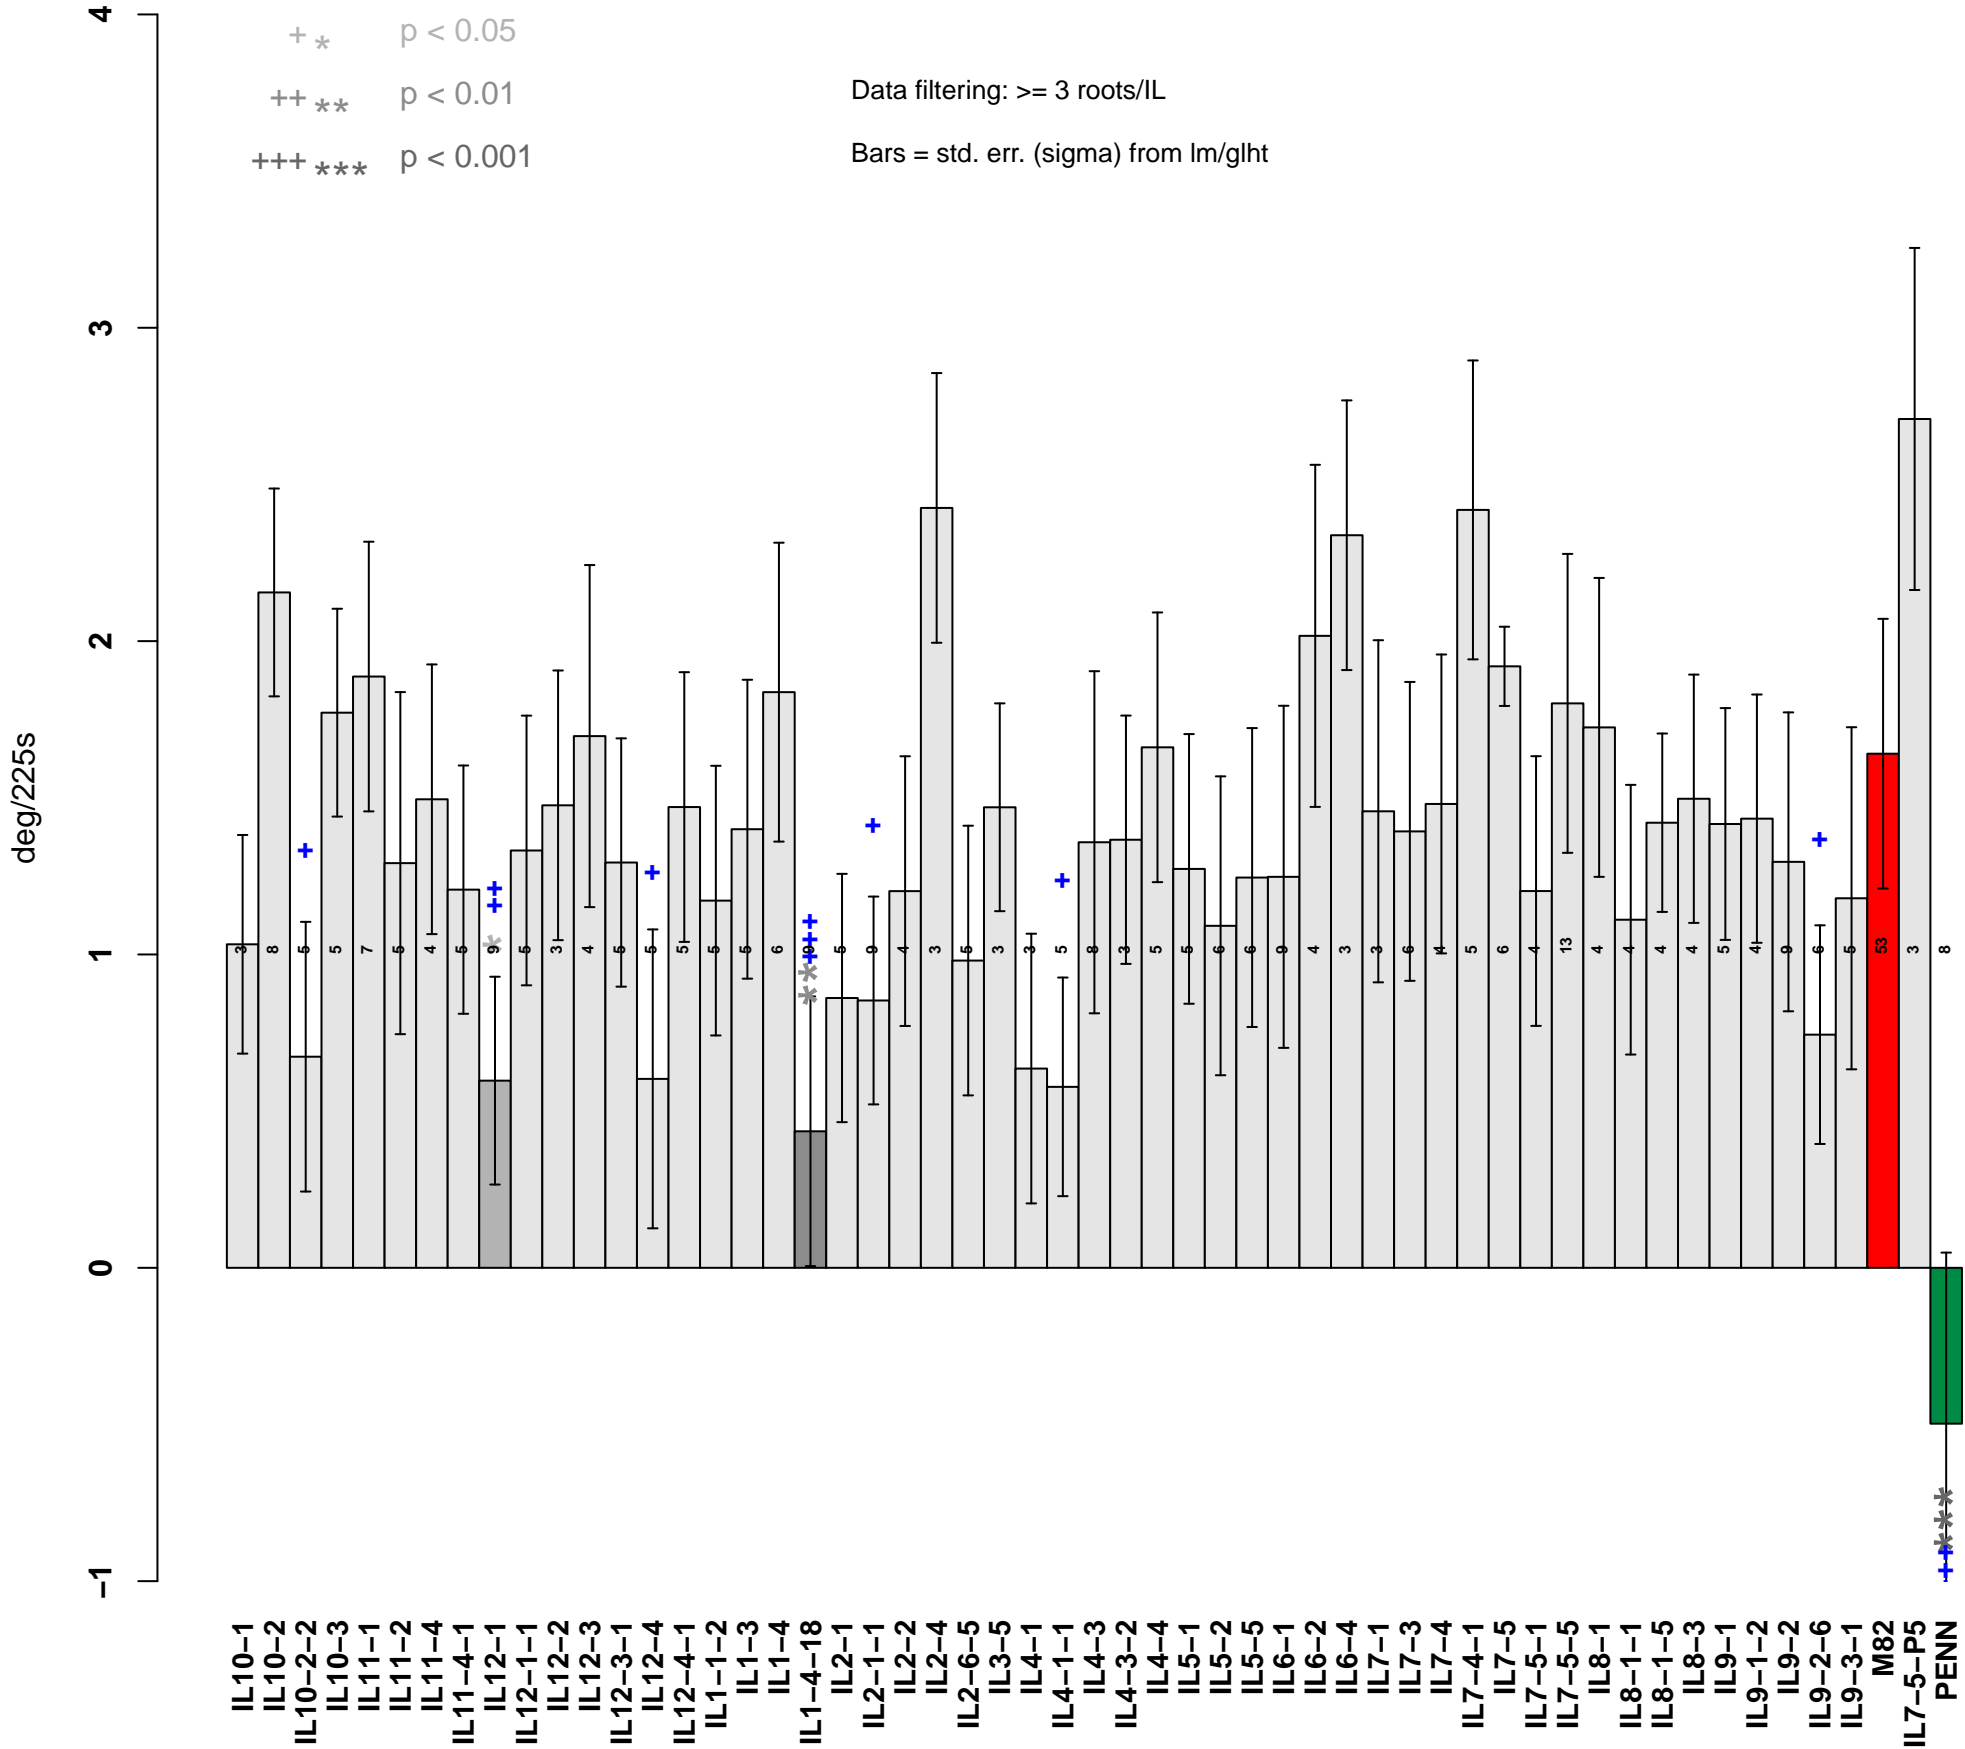

Angle Rate Away T14

+ \*      p < 0.05  
++ \*\*    p < 0.01  
+++ \*\*\*   p < 0.001

Data filtering: >= 3 roots/IL

Bars = std. err. (sigma) from lm/glht

deg/225s

4  
3  
2  
1  
0  
-1

IL10-1  
IL10-2  
IL10-2-2  
IL10-3  
IL11-1  
IL11-2  
IL11-4  
IL11-4-1  
IL12-1  
IL12-1-1  
IL12-2  
IL12-3  
IL12-3-1  
IL12-4  
IL12-4-1  
IL1-1-2  
IL1-3  
IL1-4  
IL1-4-18  
IL2-1  
IL2-1-1  
IL2-2  
IL2-4  
IL2-6-5  
IL3-5  
IL4-1  
IL4-1-1  
IL4-3  
IL4-3-2  
IL4-4  
IL5-1  
IL5-2  
IL5-5  
IL6-1  
IL6-2  
IL6-4  
IL7-1  
IL7-3  
IL7-4  
IL7-4-1  
IL7-5  
IL7-5-1  
IL7-5-5  
IL8-1  
IL8-1-1  
IL8-1-5  
IL8-3  
IL9-1  
IL9-1-2  
IL9-2  
IL9-2-6  
IL9-3-1  
M82  
IL7-5-P5  
PENN

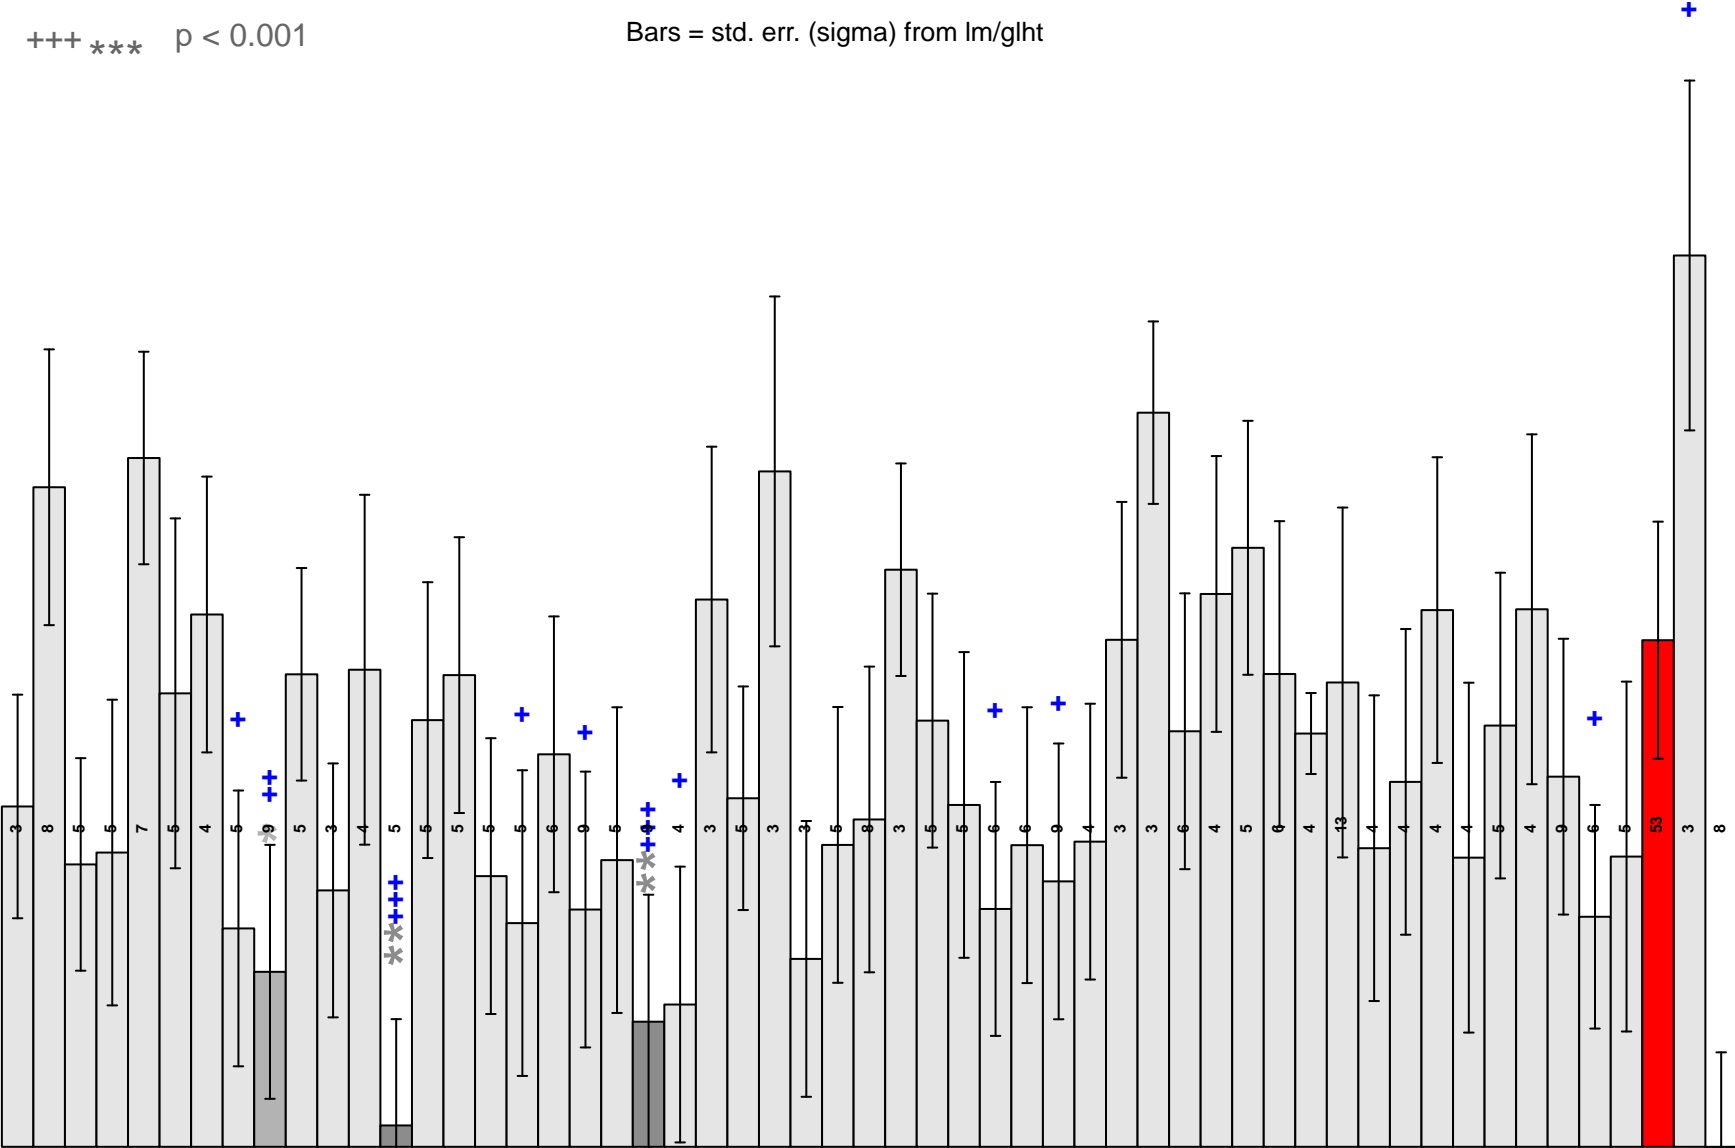

# Angle Rate Away T15

deg/225s

+ \* p < 0.05  
 ++ \*\* p < 0.01  
 +++ \*\*\* p < 0.001

Data filtering: >= 3 roots/IL

Bars = std. err. (sigma) from lm/glht

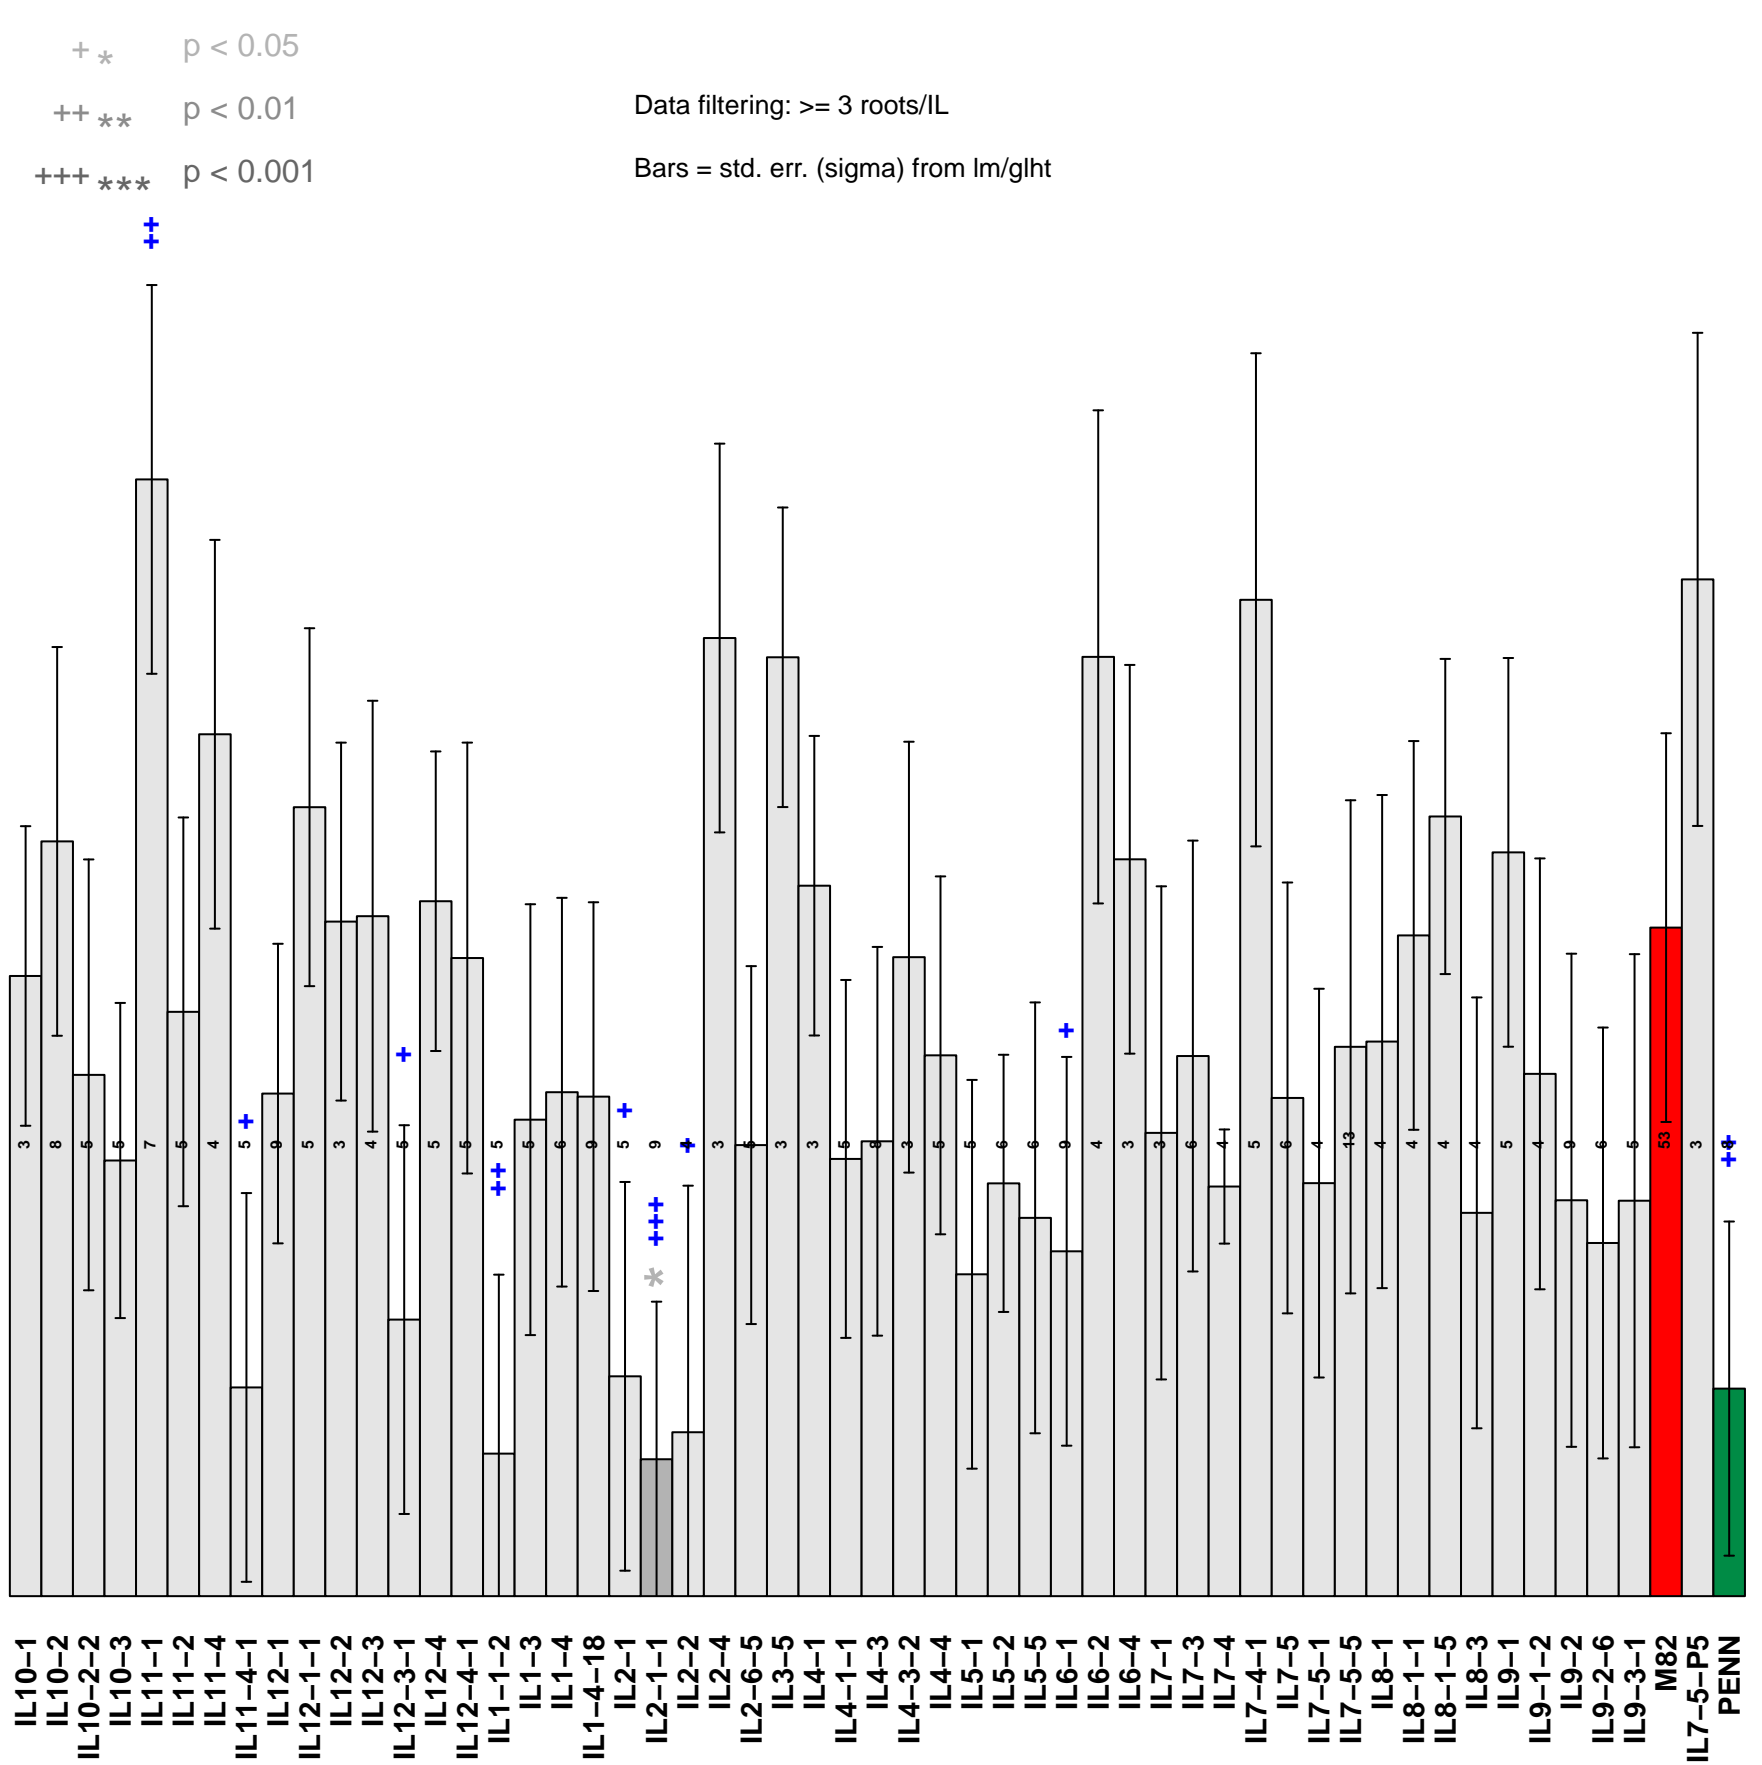



Angle Rate Away T16

+ \*      p < 0.05  
++ \*\*    p < 0.01  
+++ \*\*\*   p < 0.001

Data filtering: >= 3 roots/IL

Bars = std. err. (sigma) from lm/glht

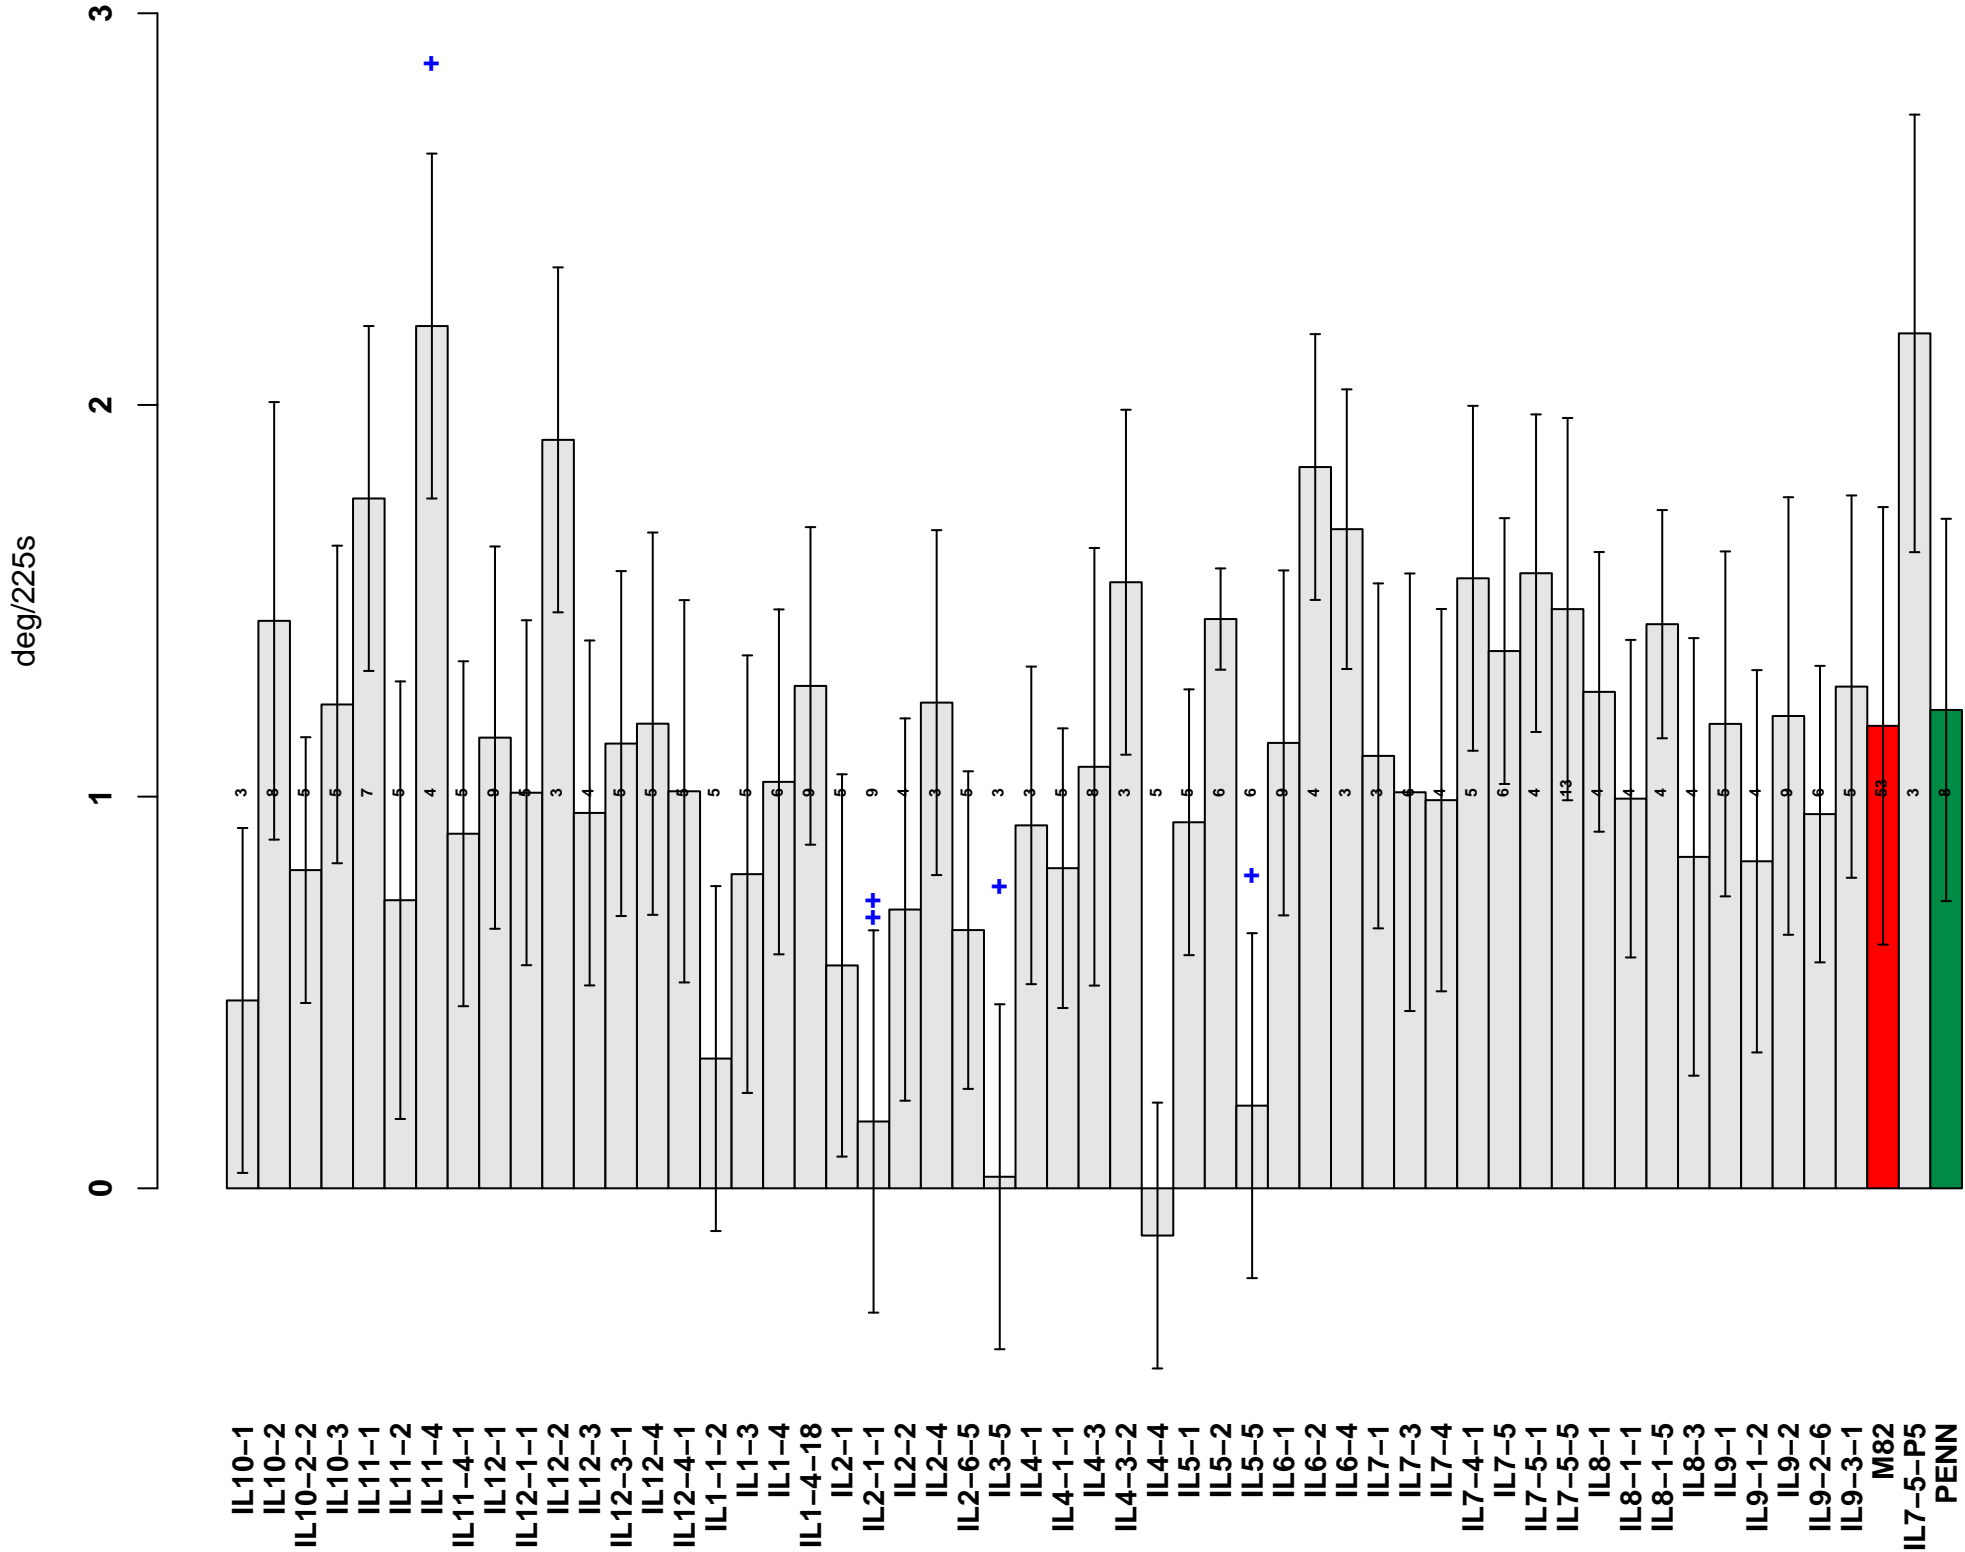

# Angle Rate Away T17

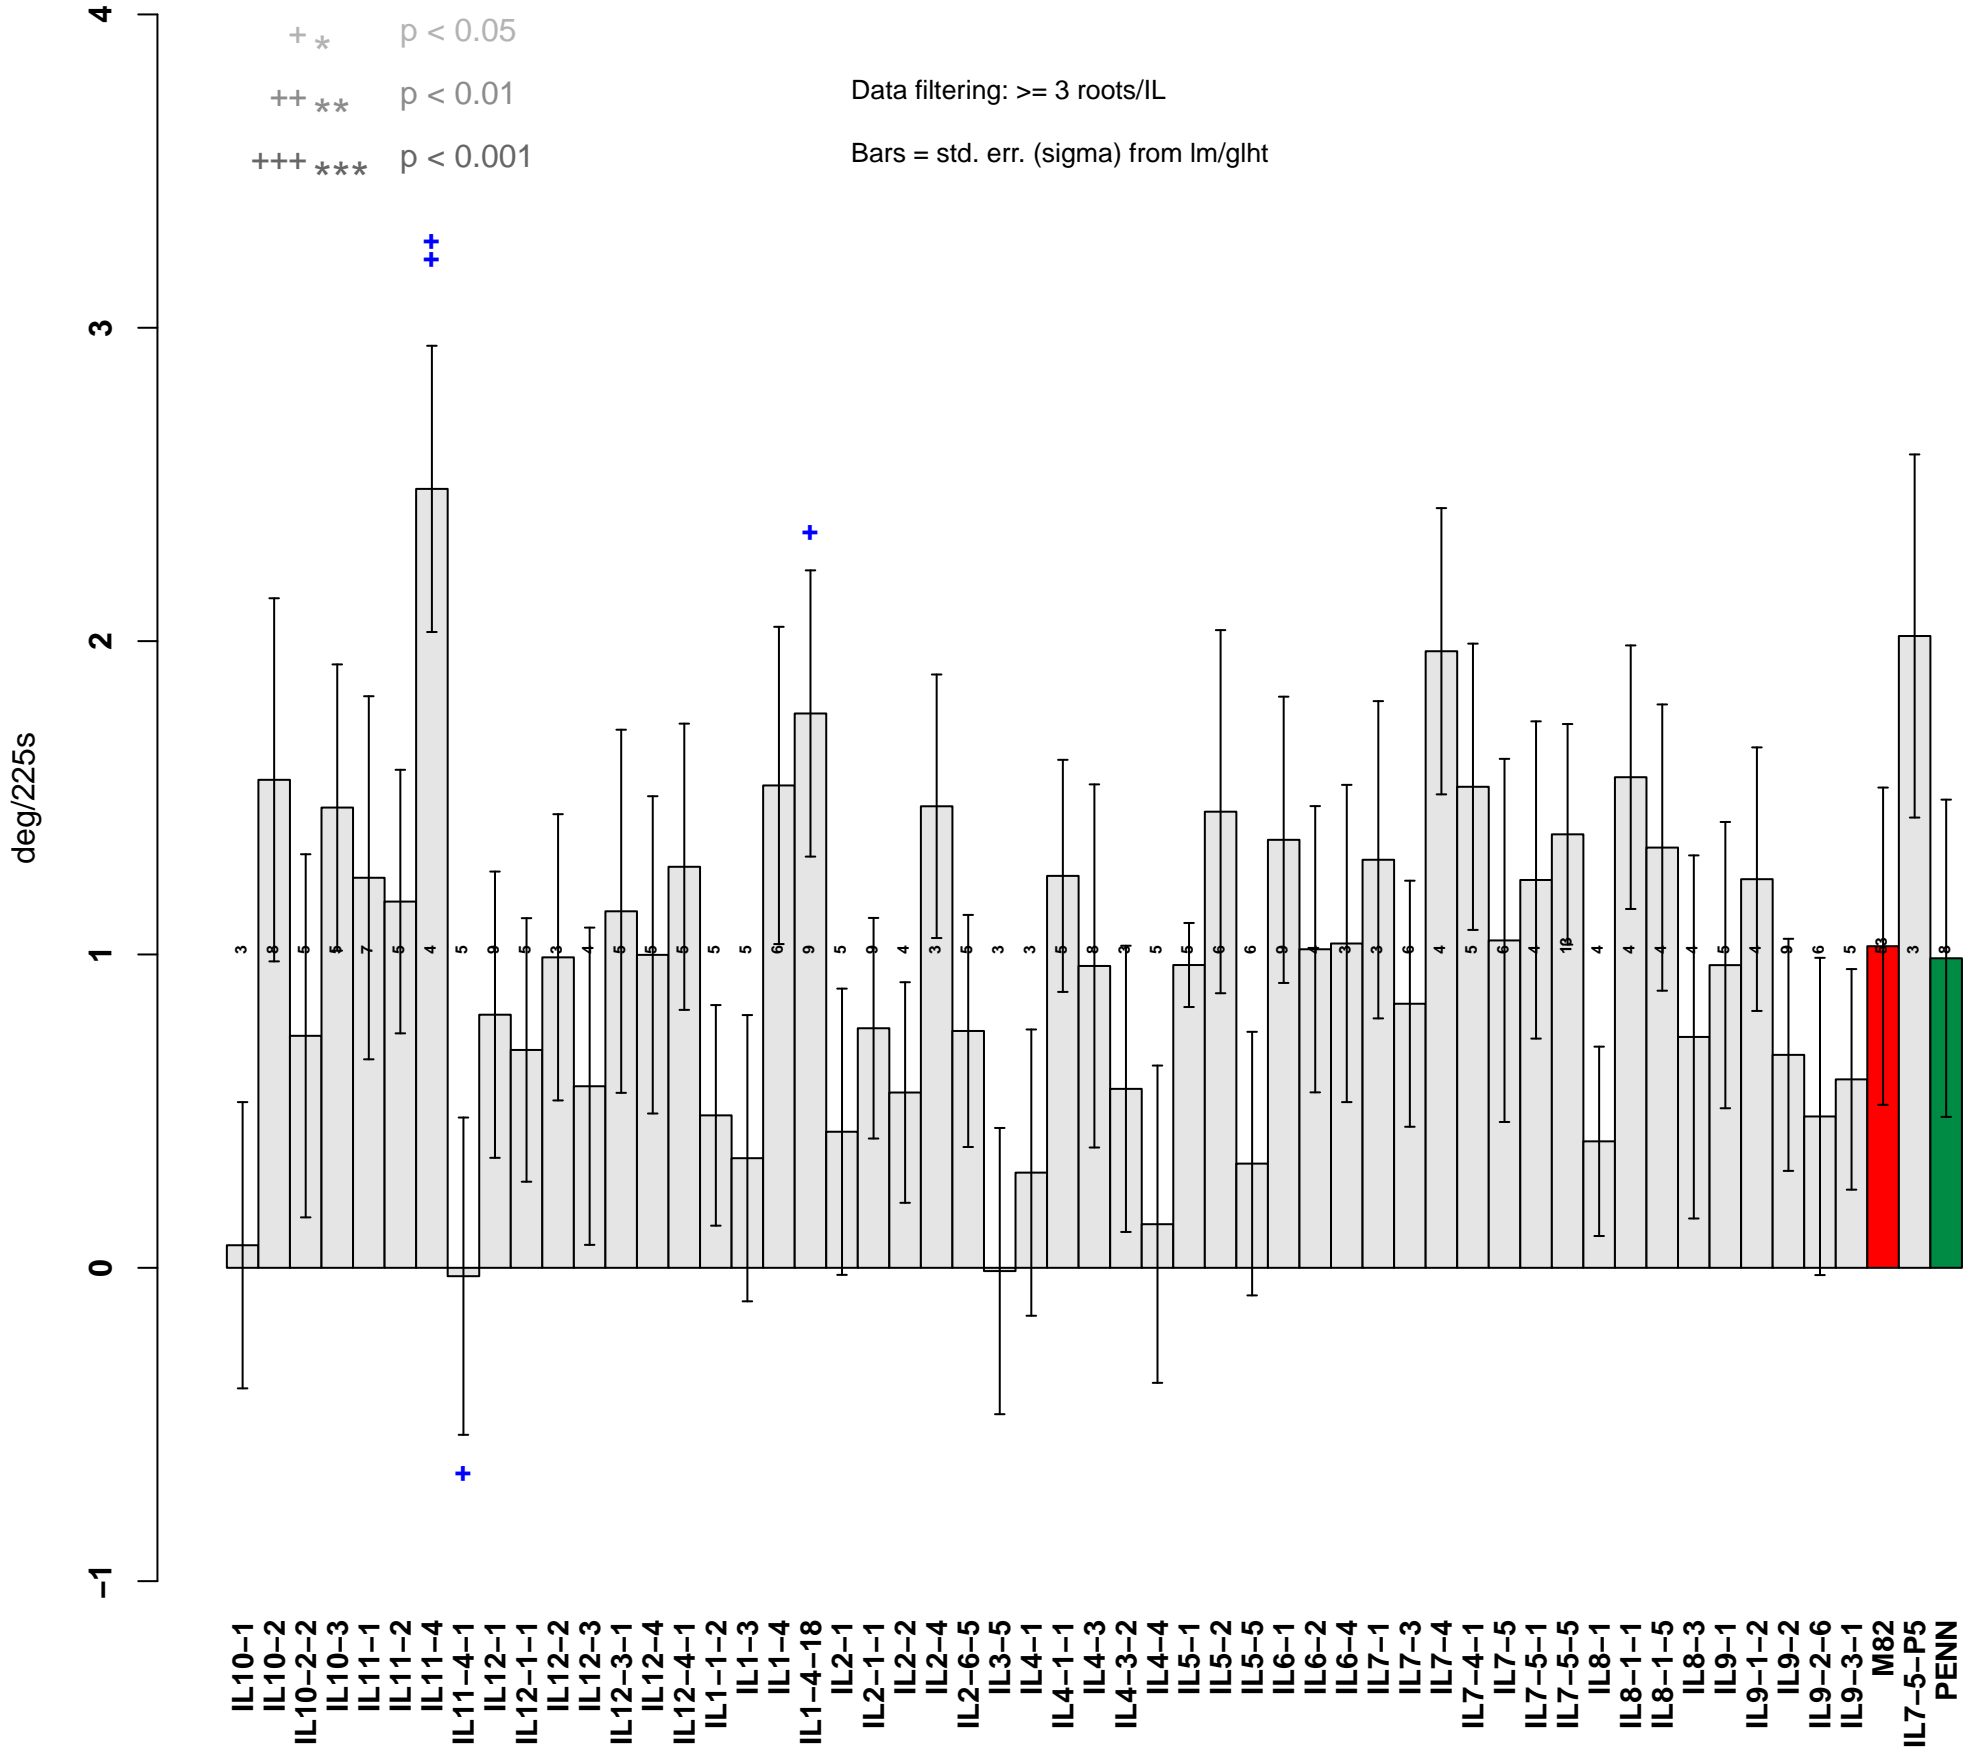

# Angle Rate Away T18

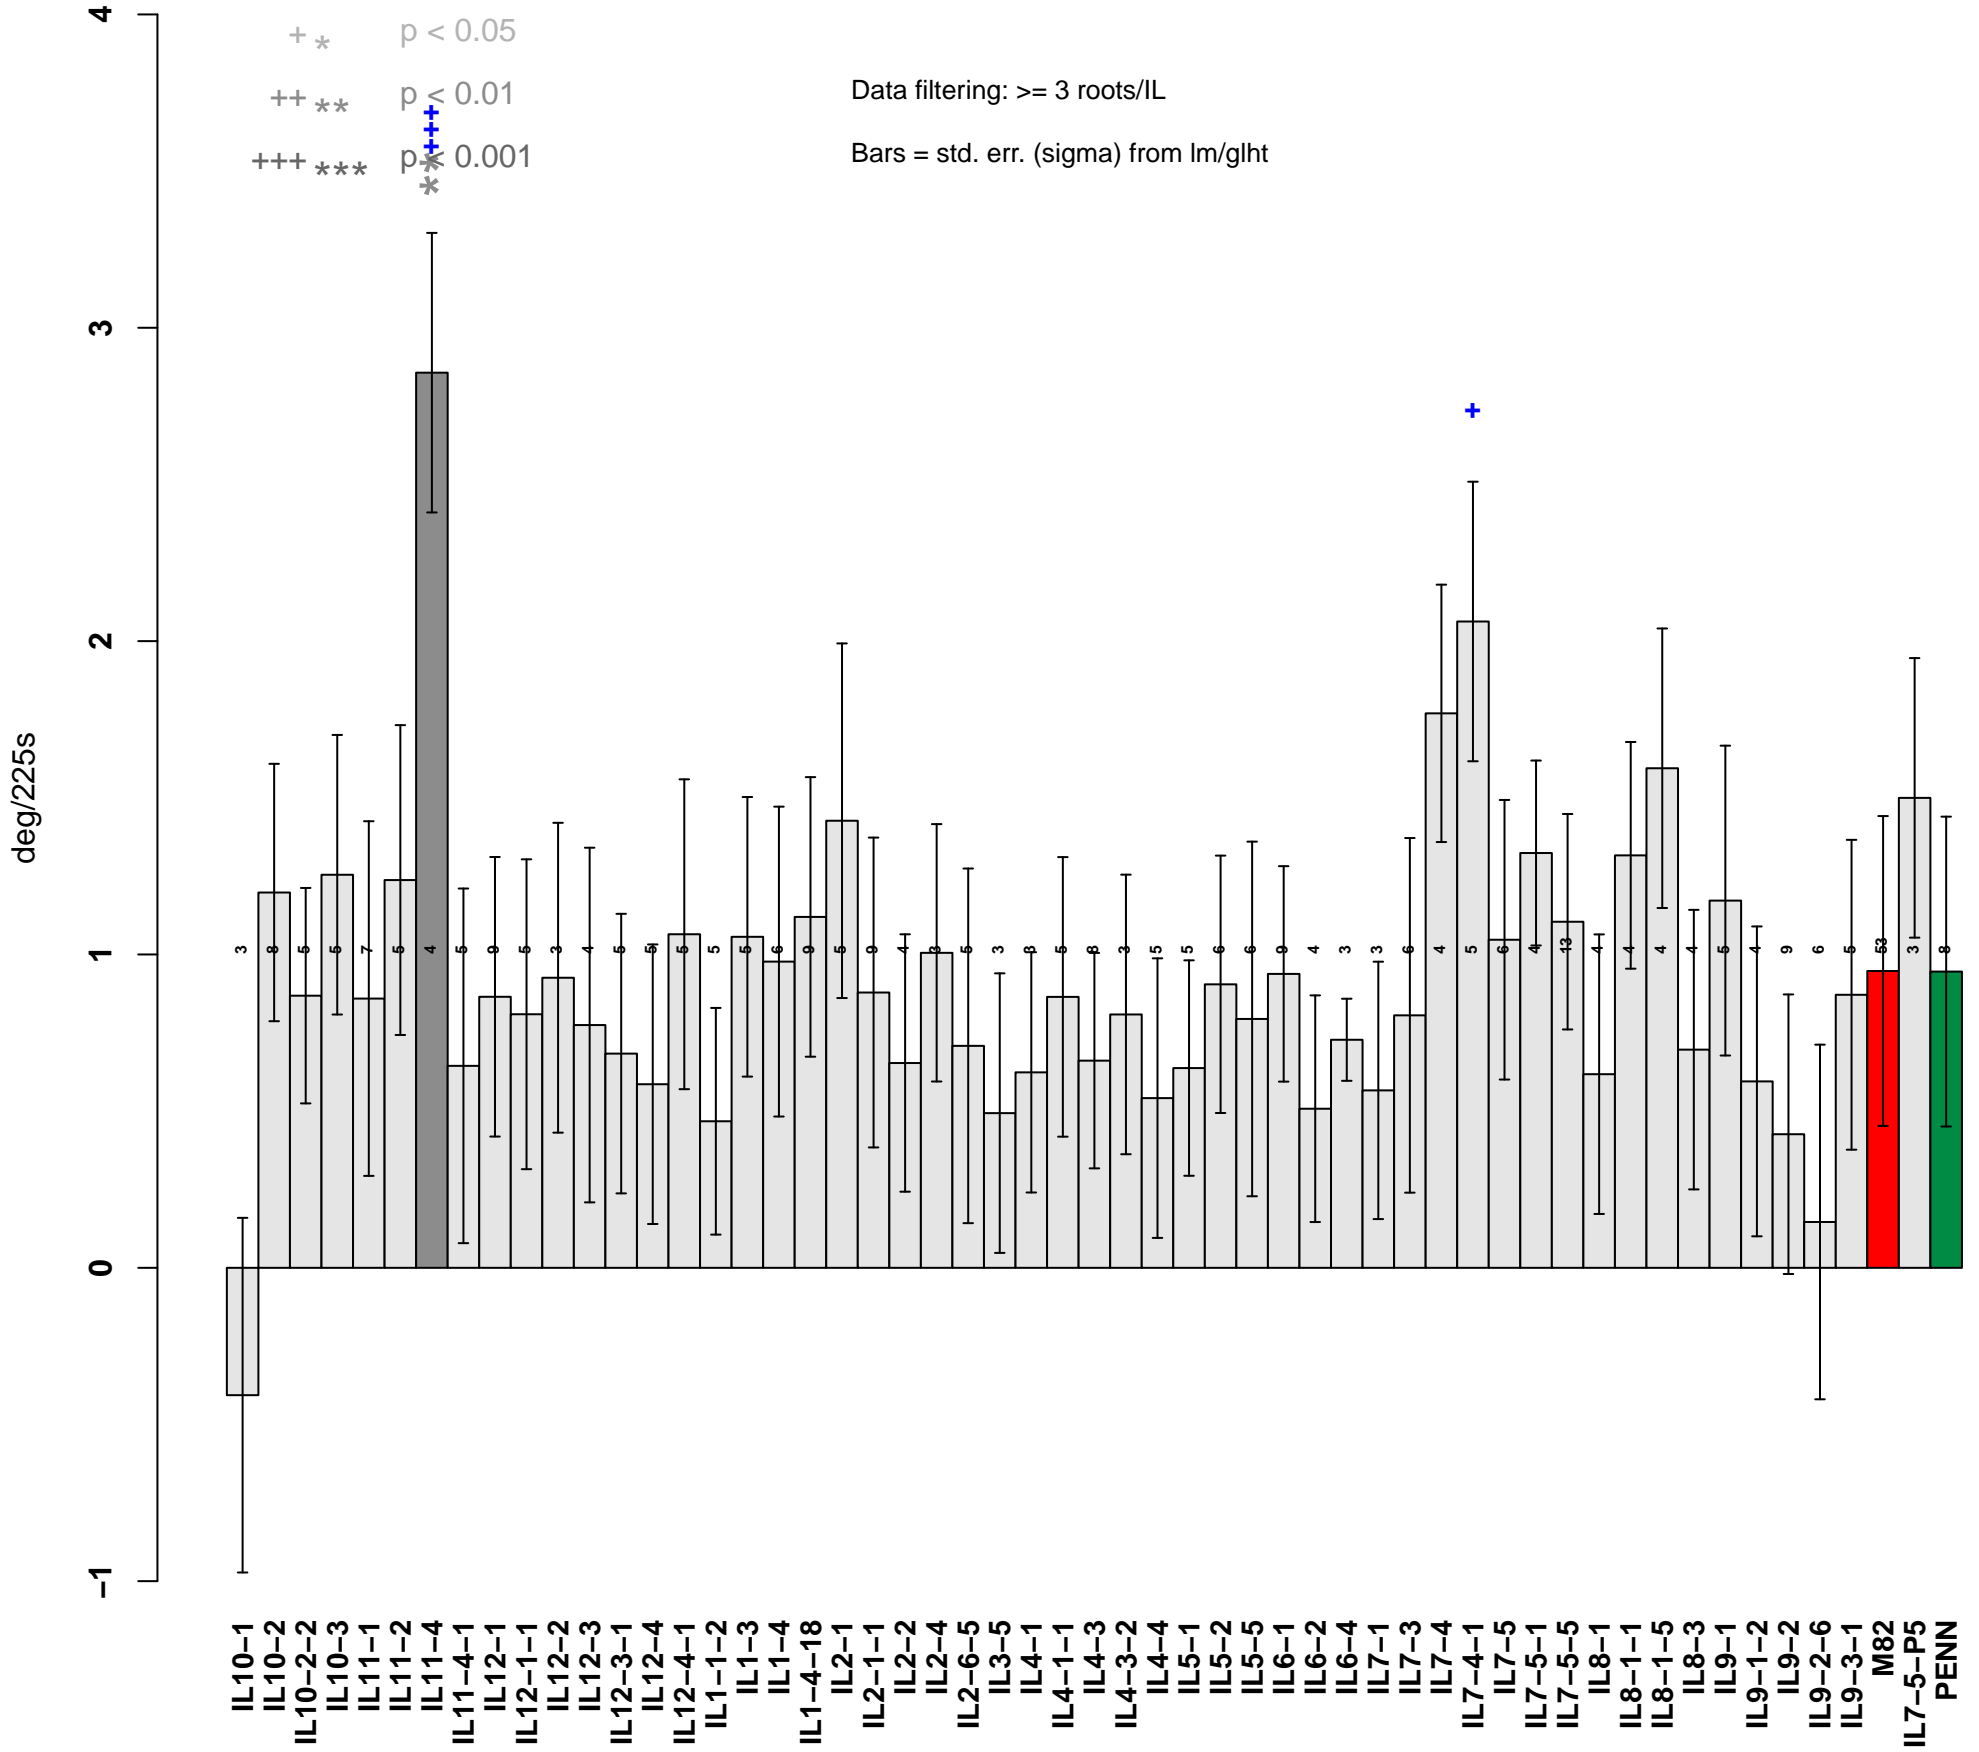

# Angle Rate Away T19

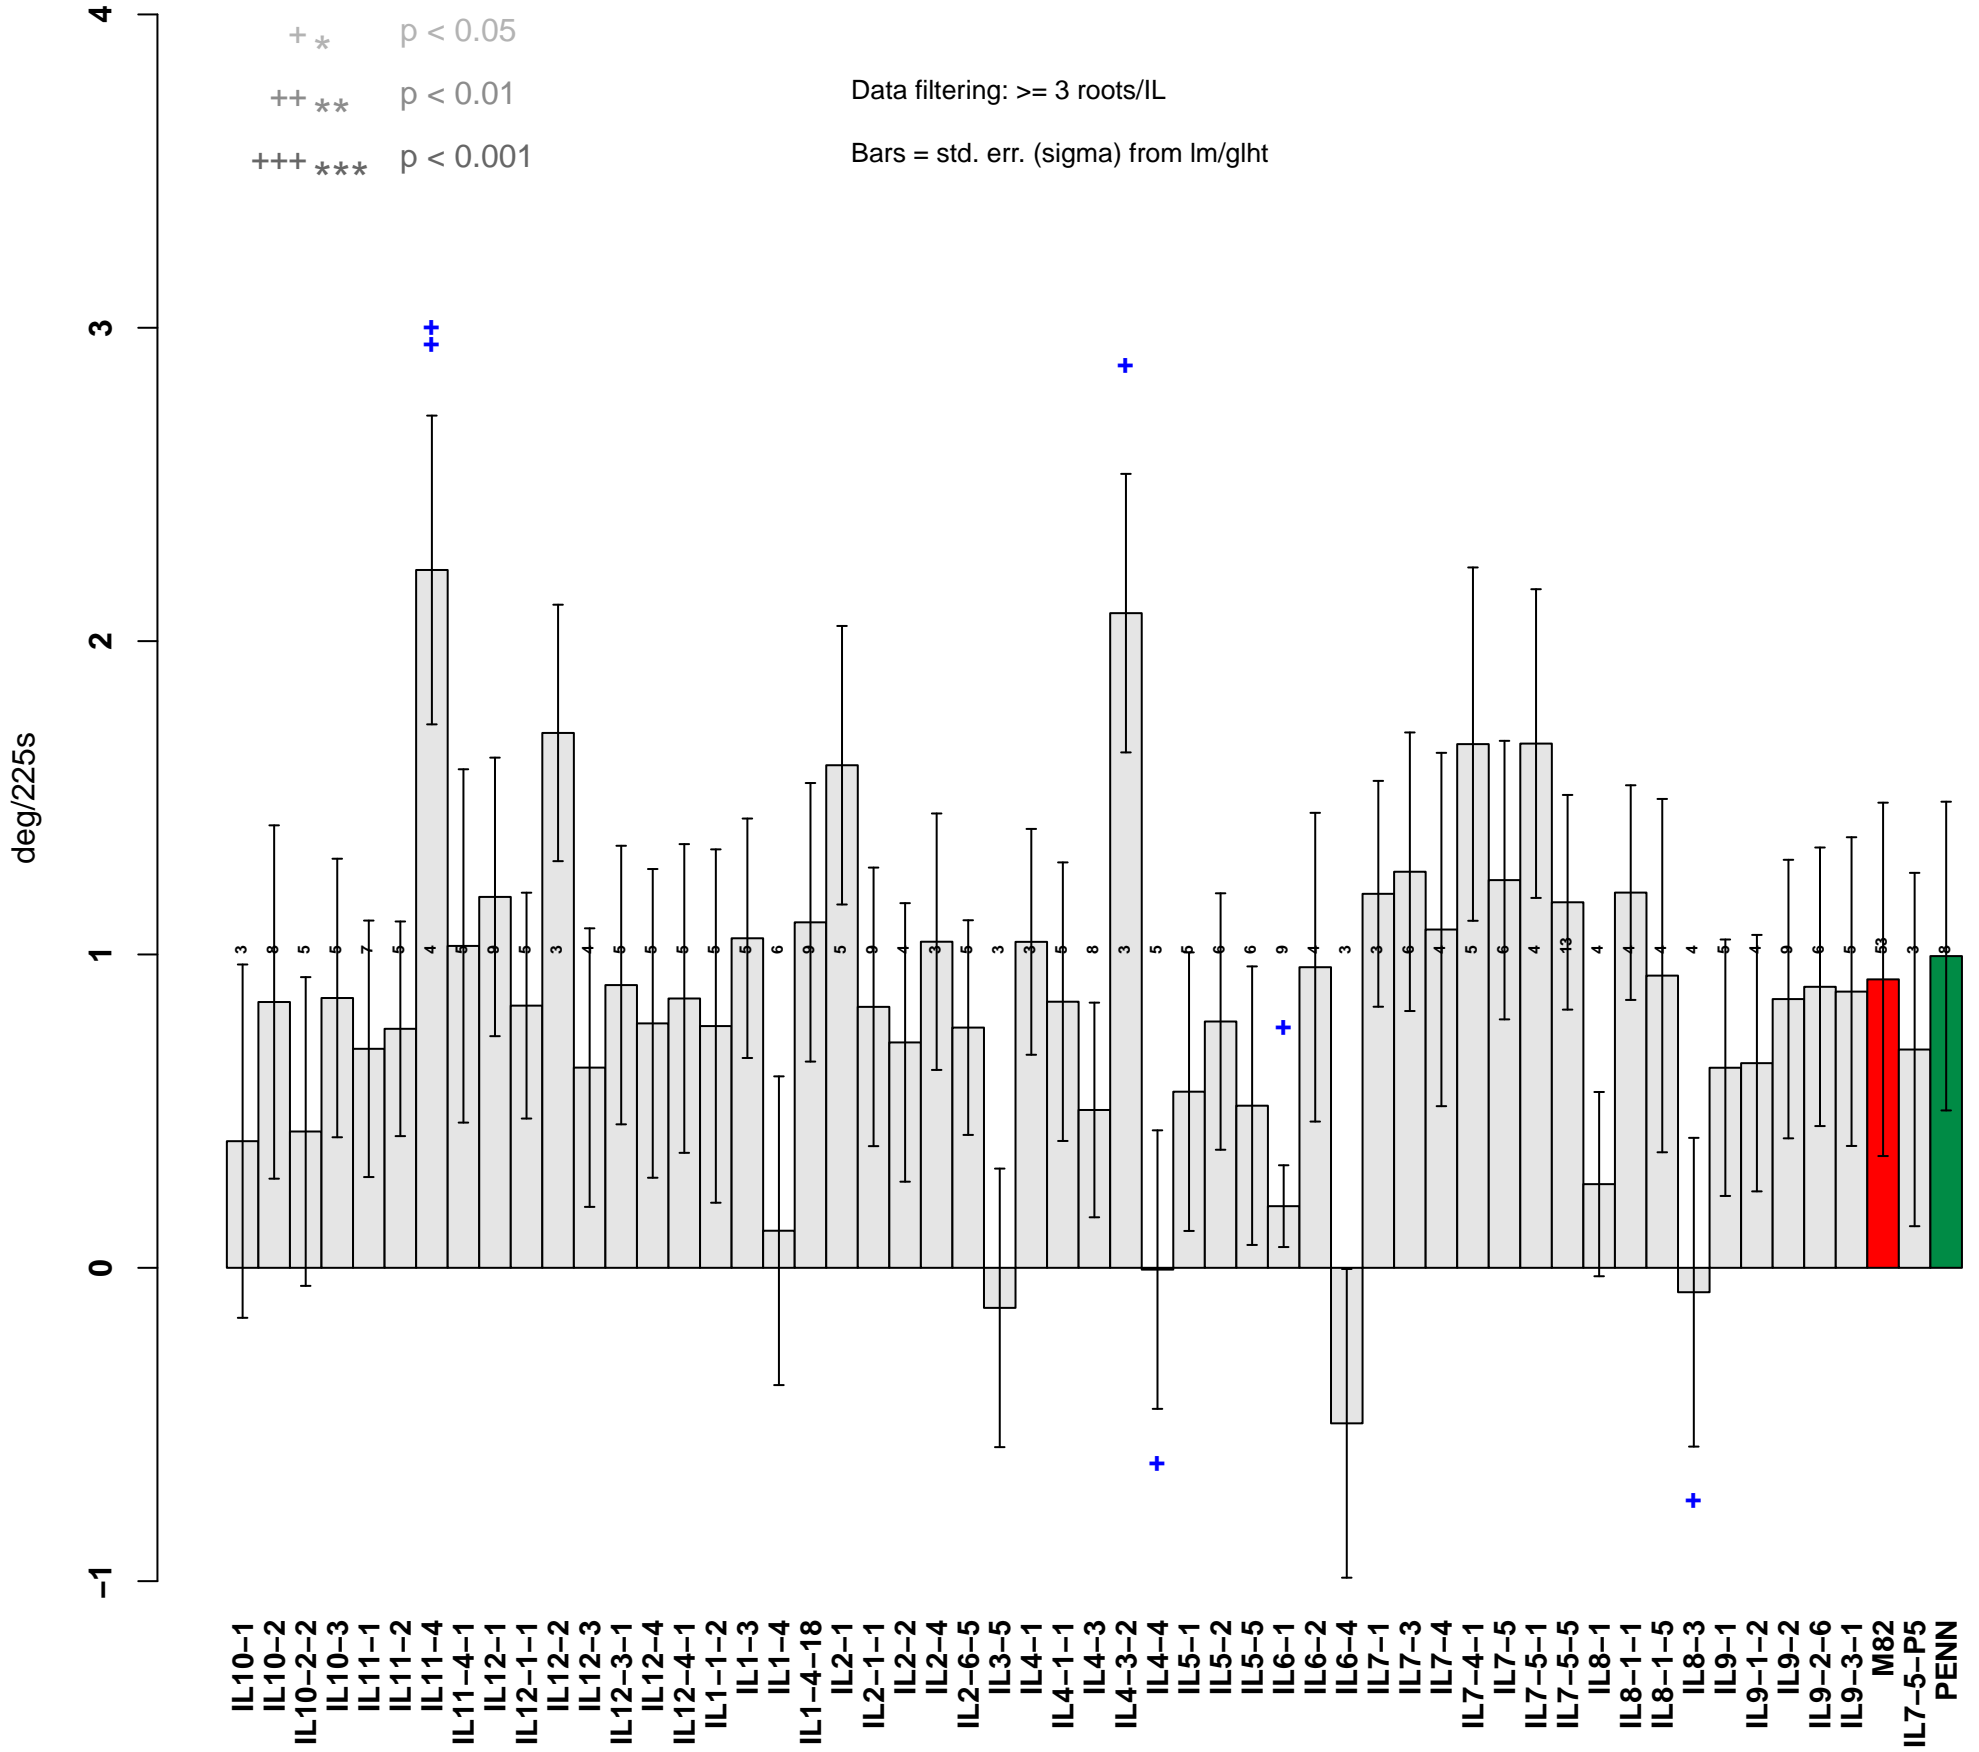

# Angle Rate Away T20

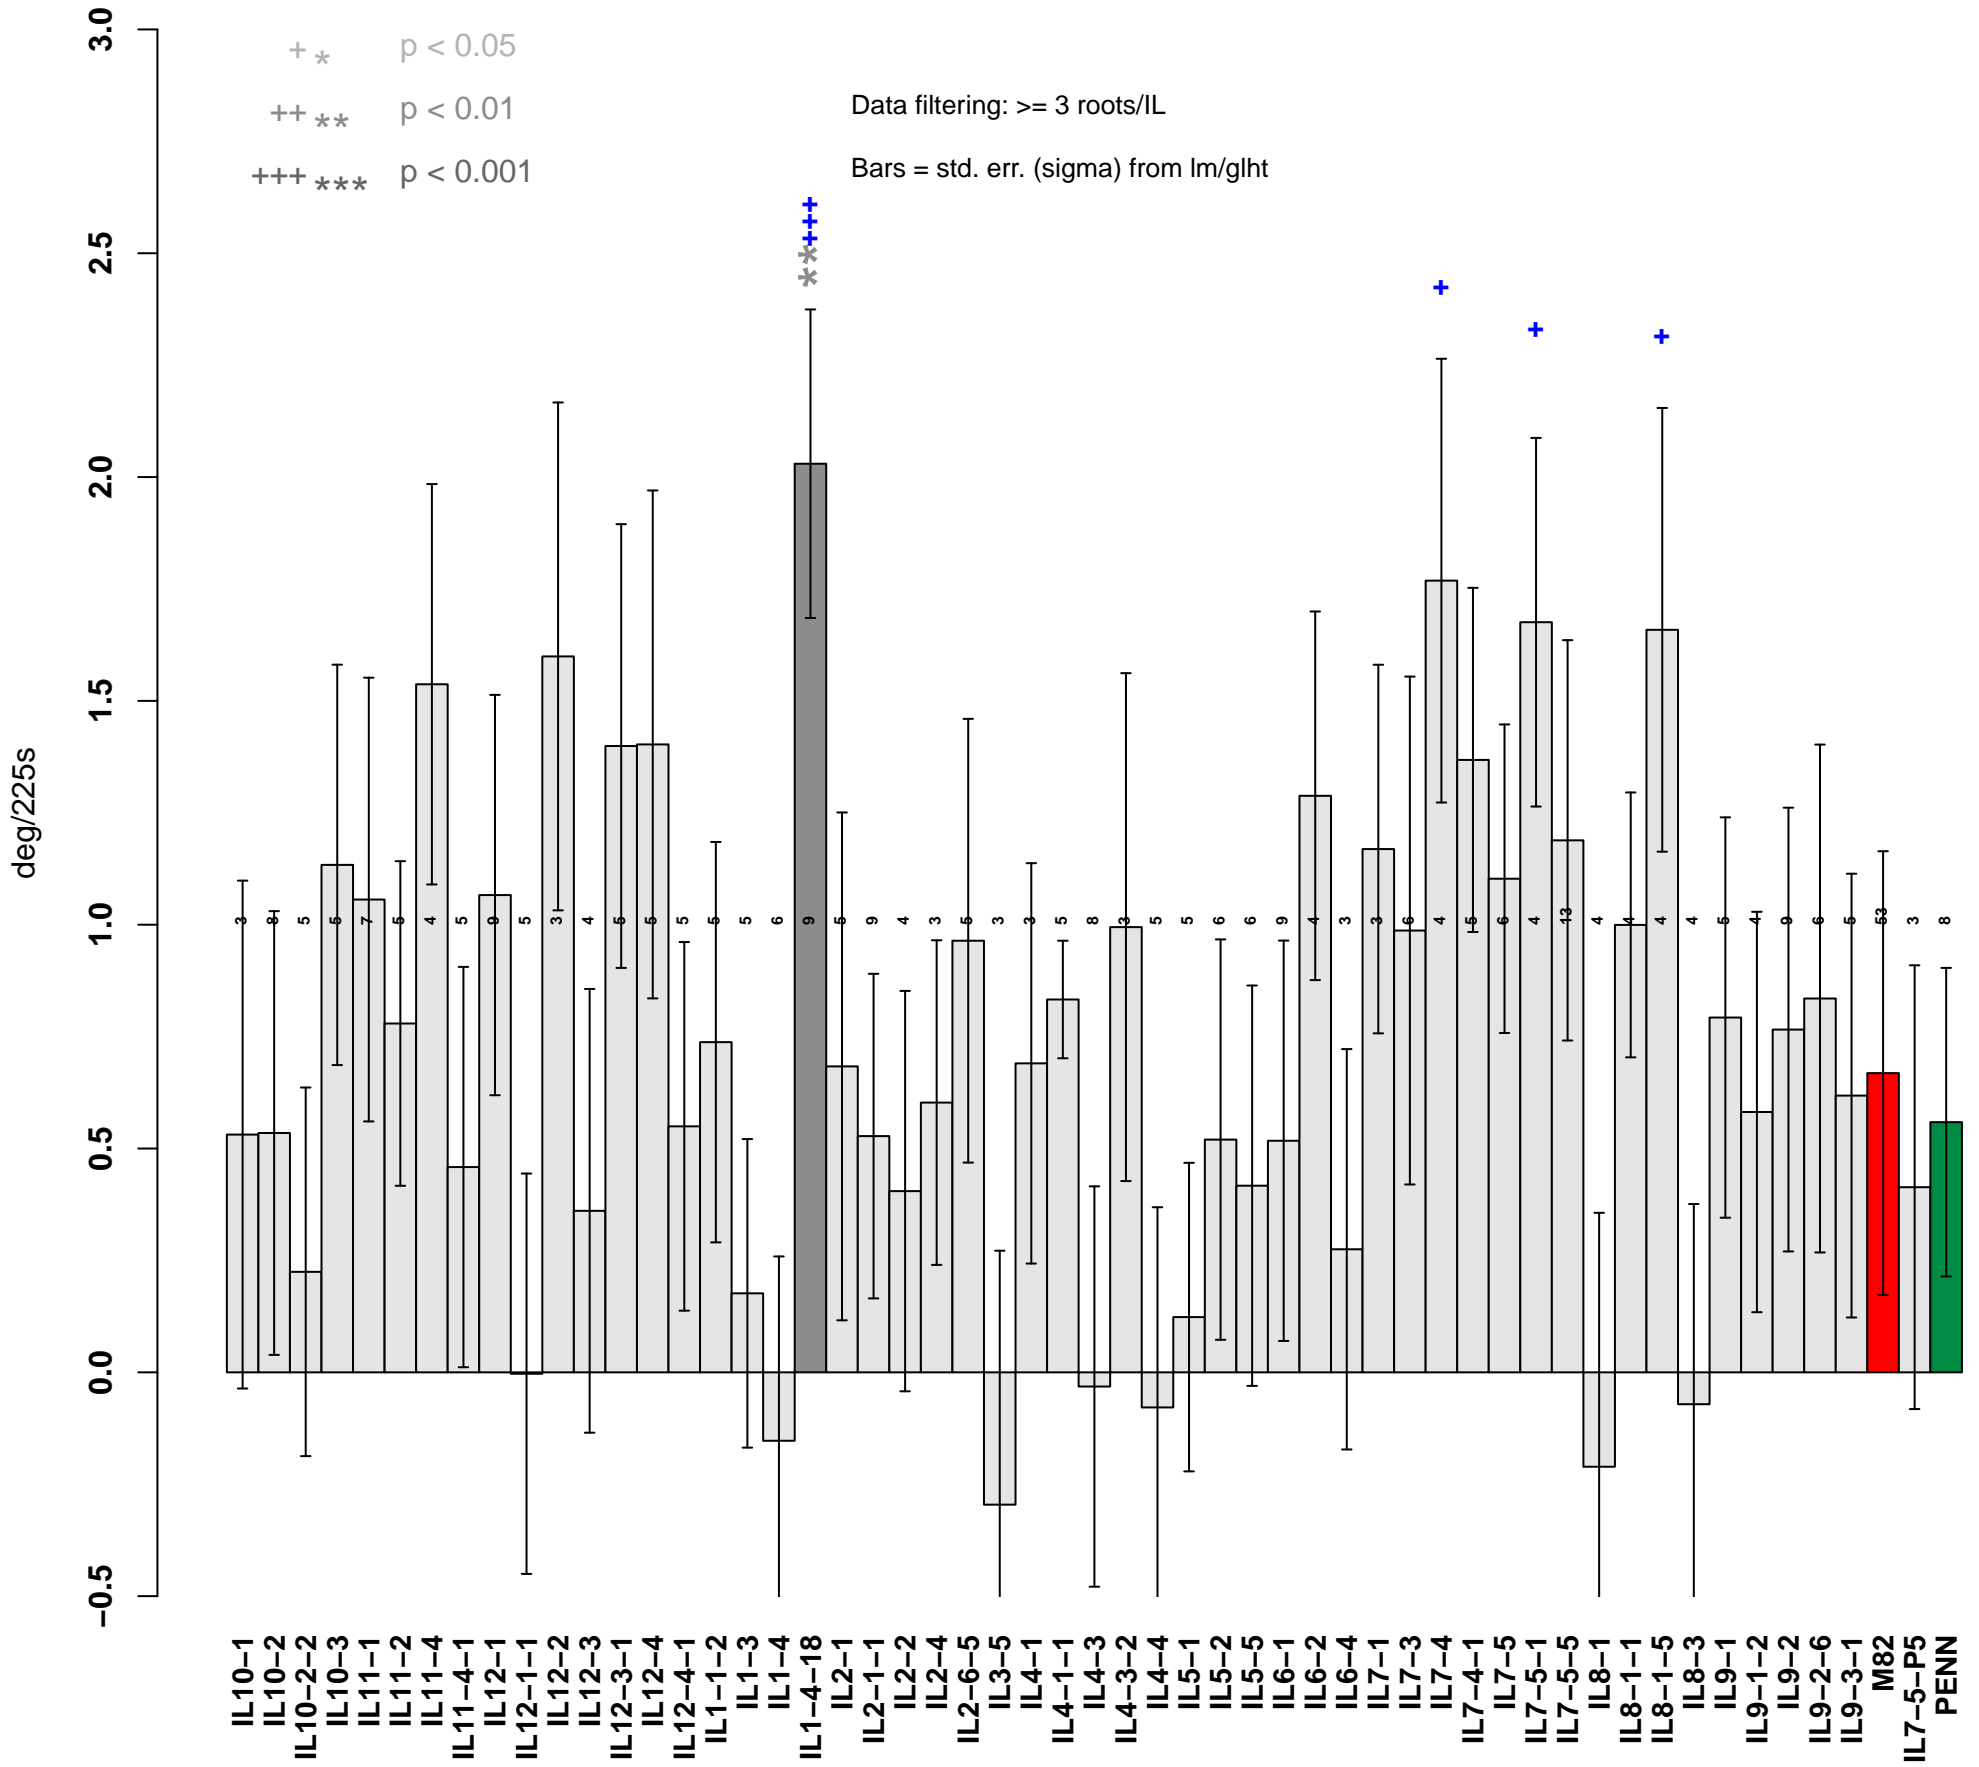

# Angle Rate Away T21

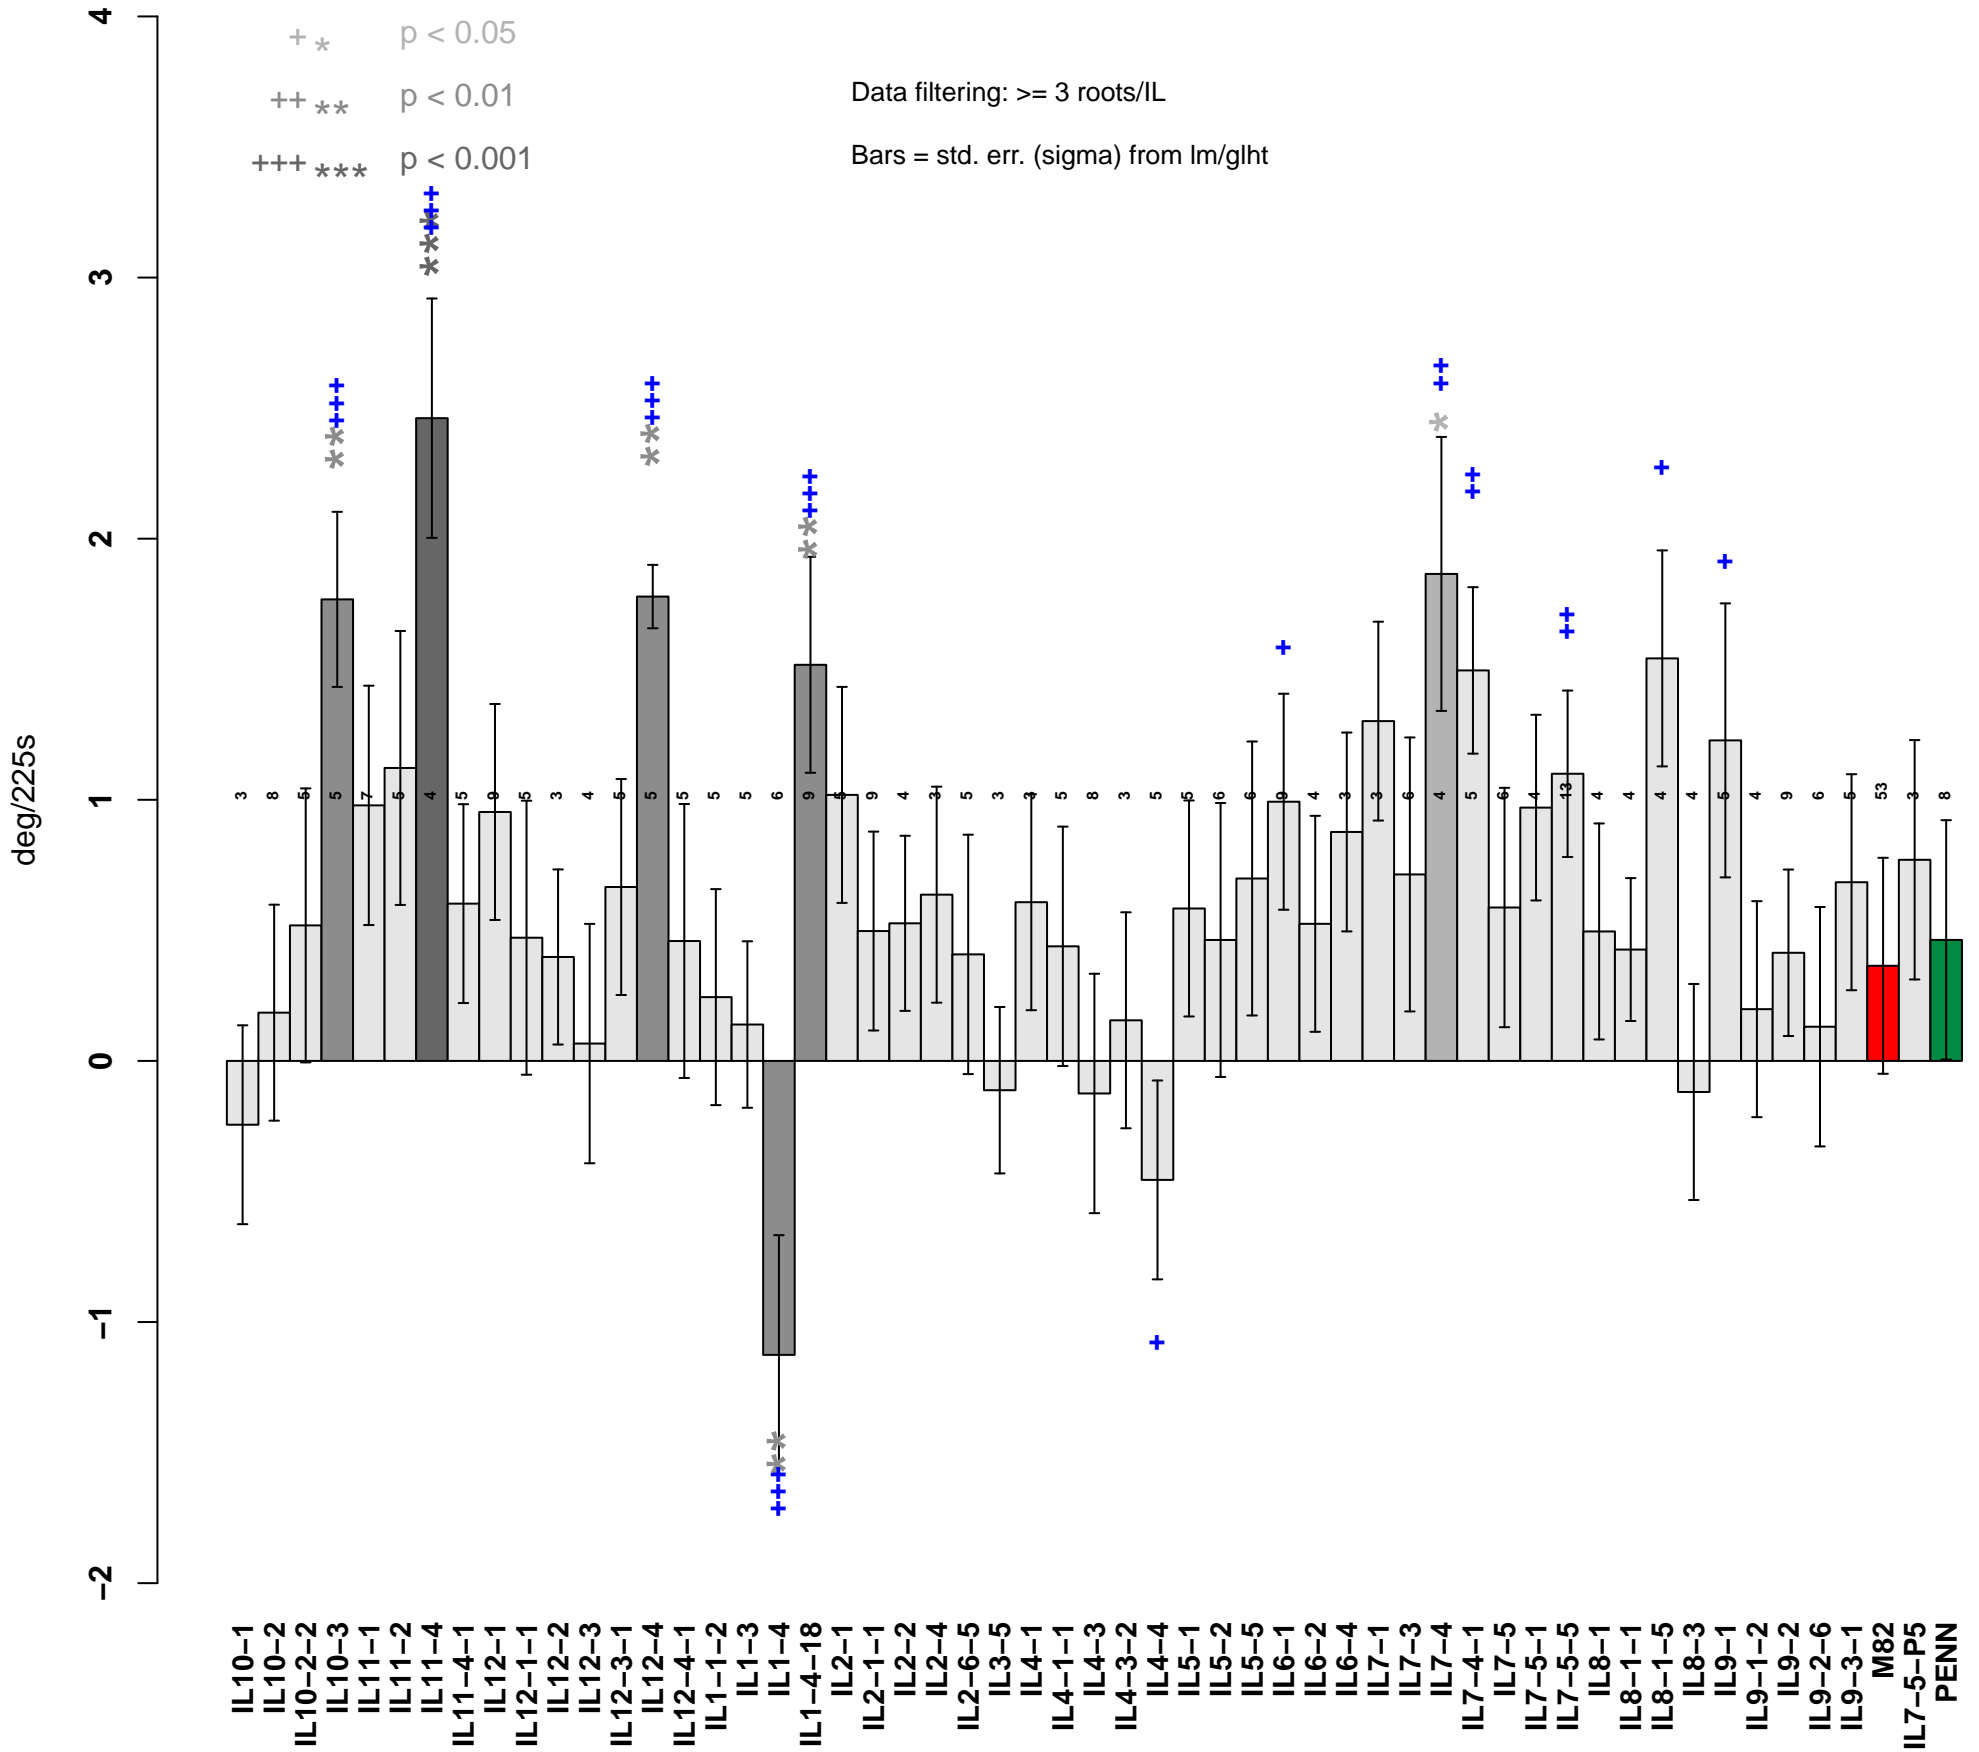

# Angle Rate Away T22

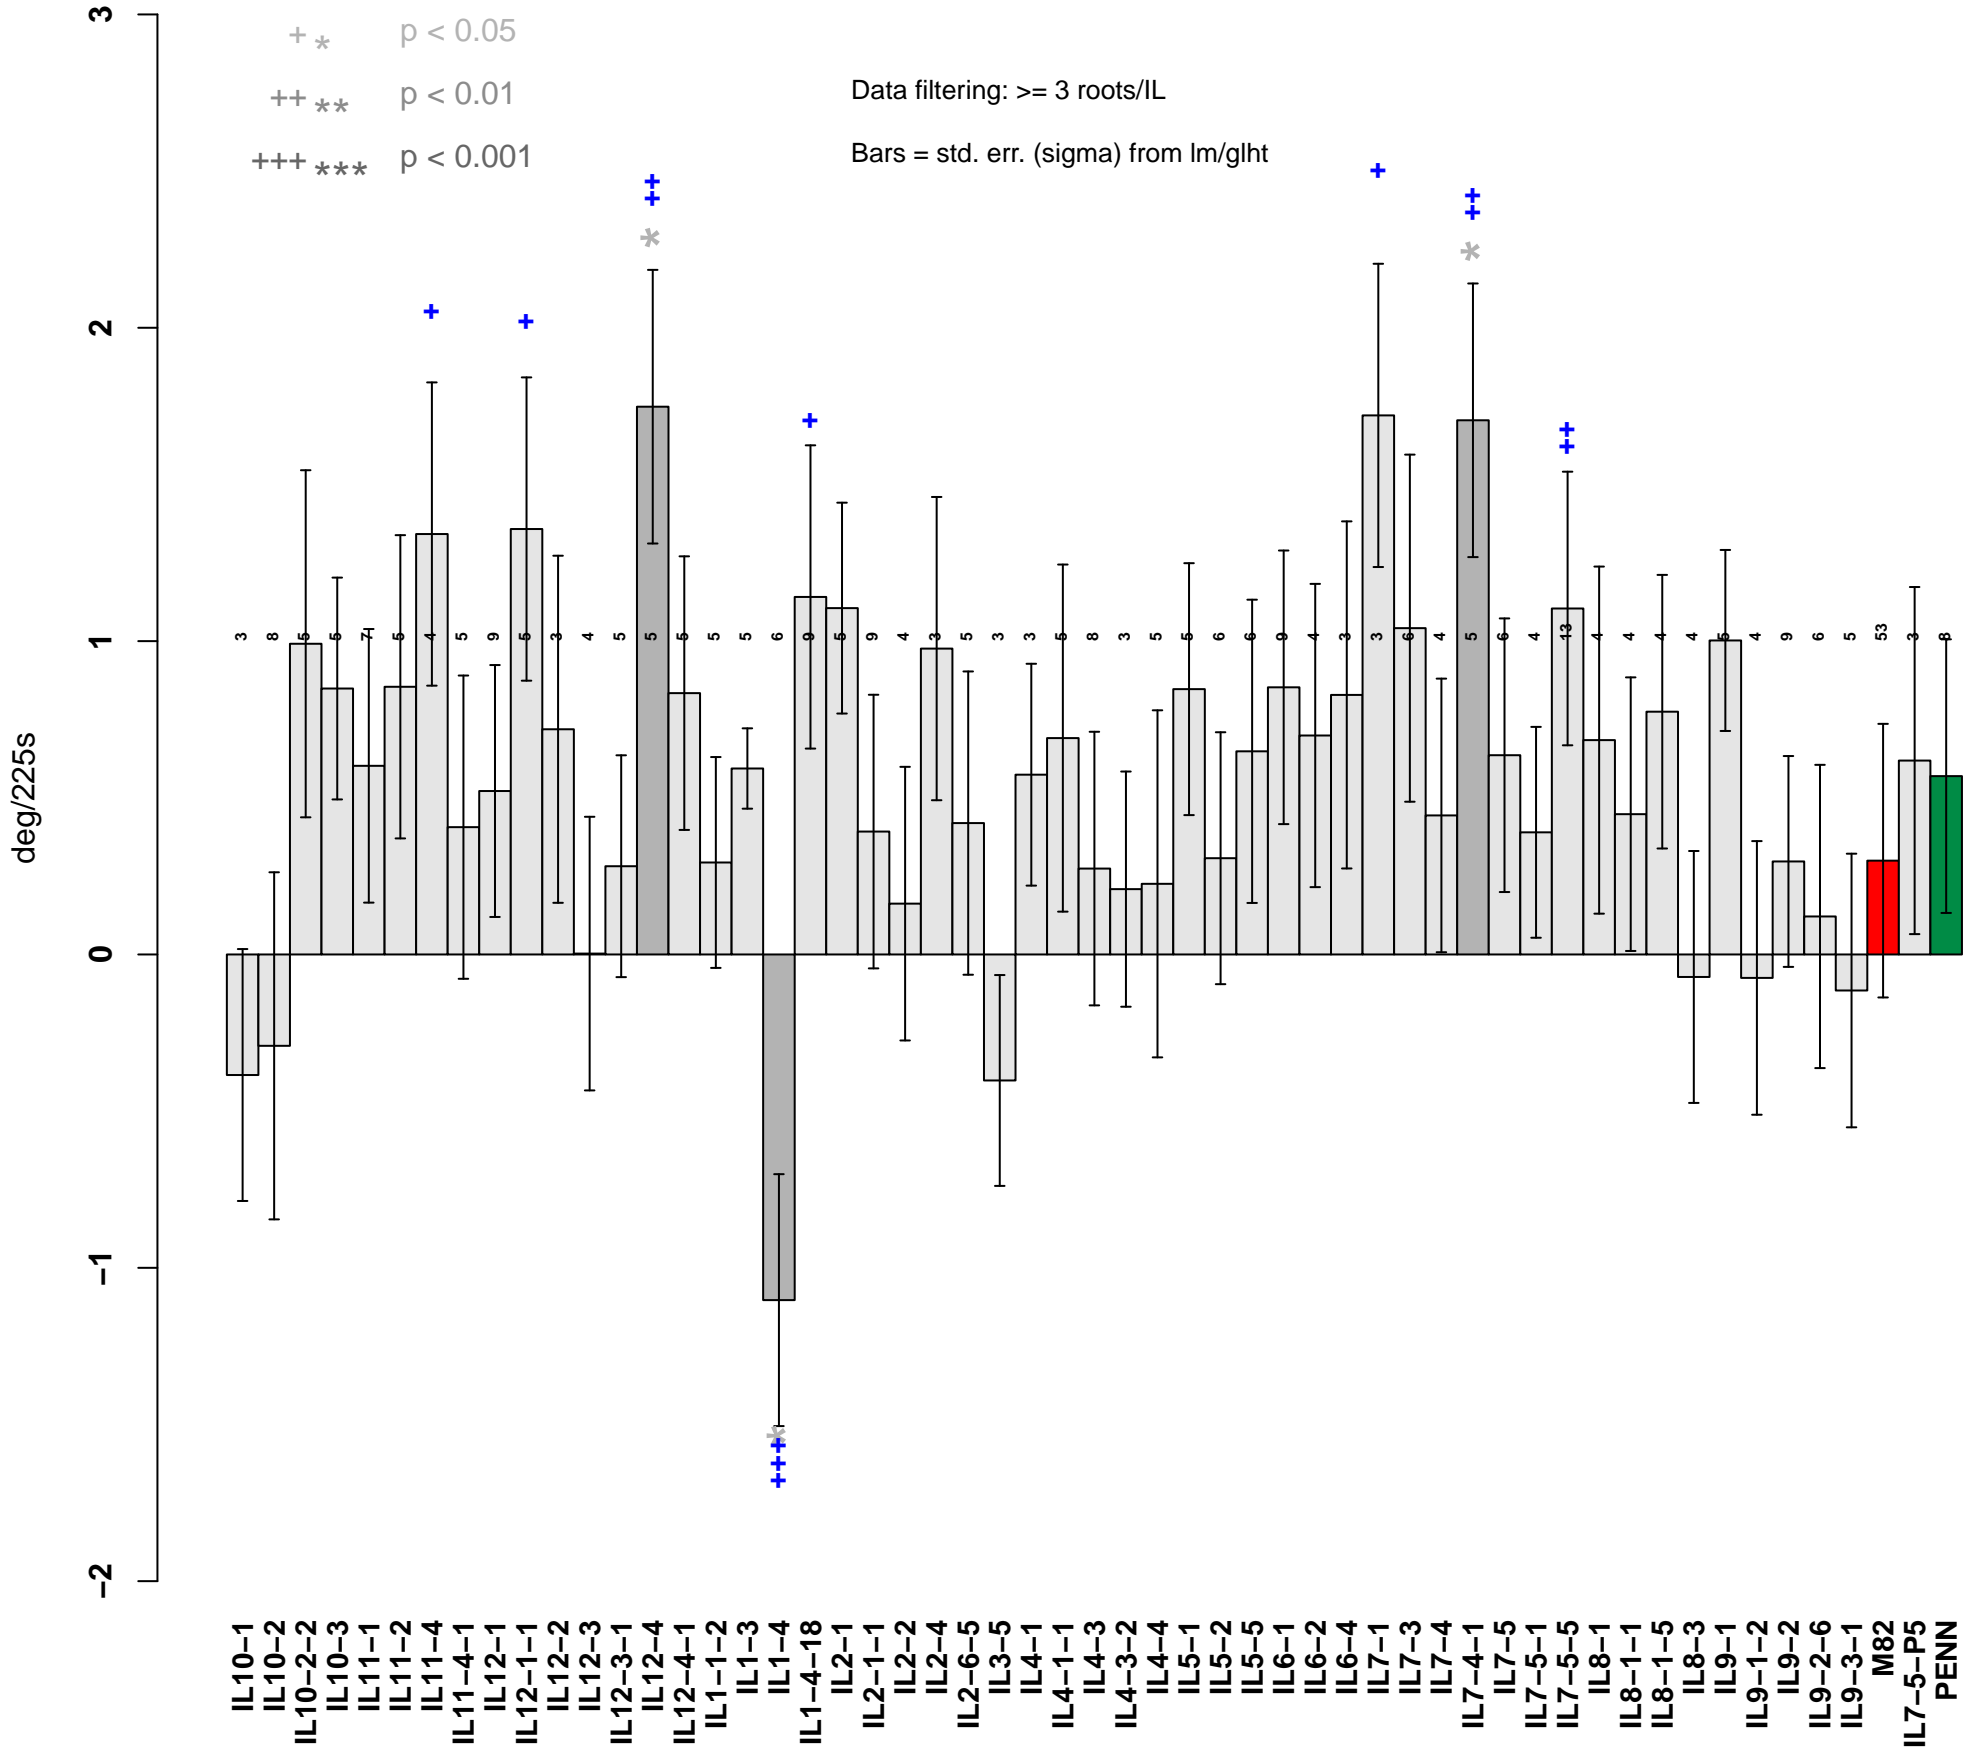

# Angle Rate Away T23

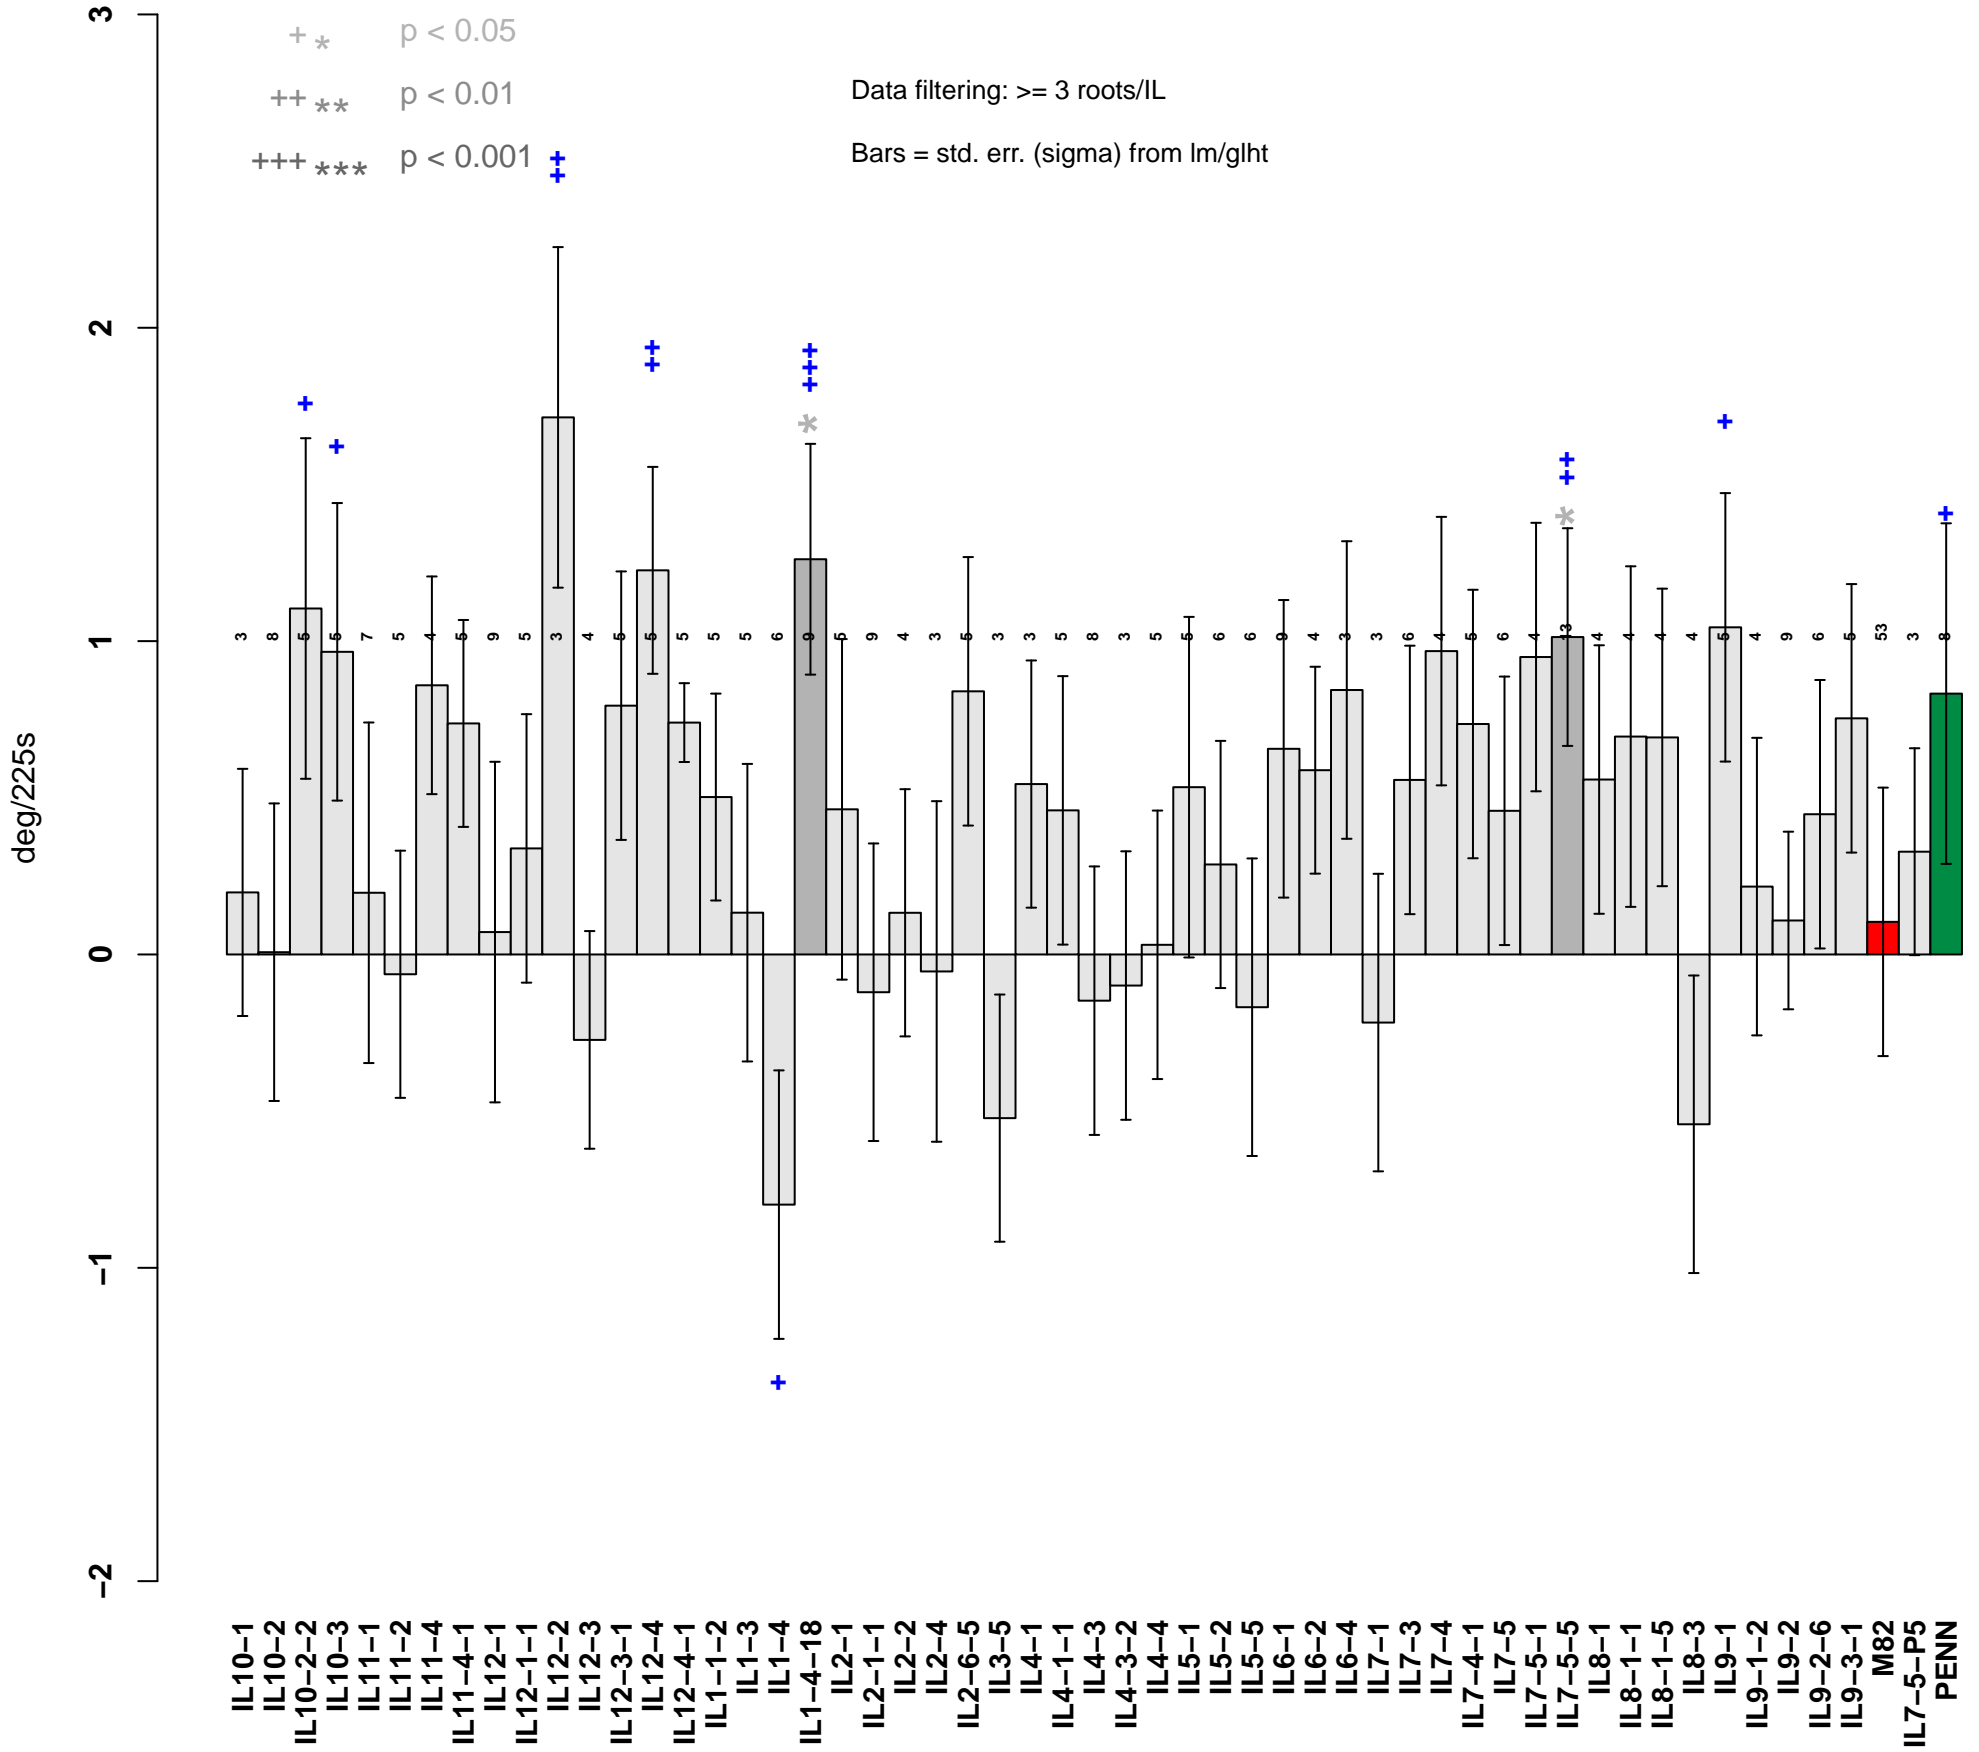



# Angle Rate Away T24

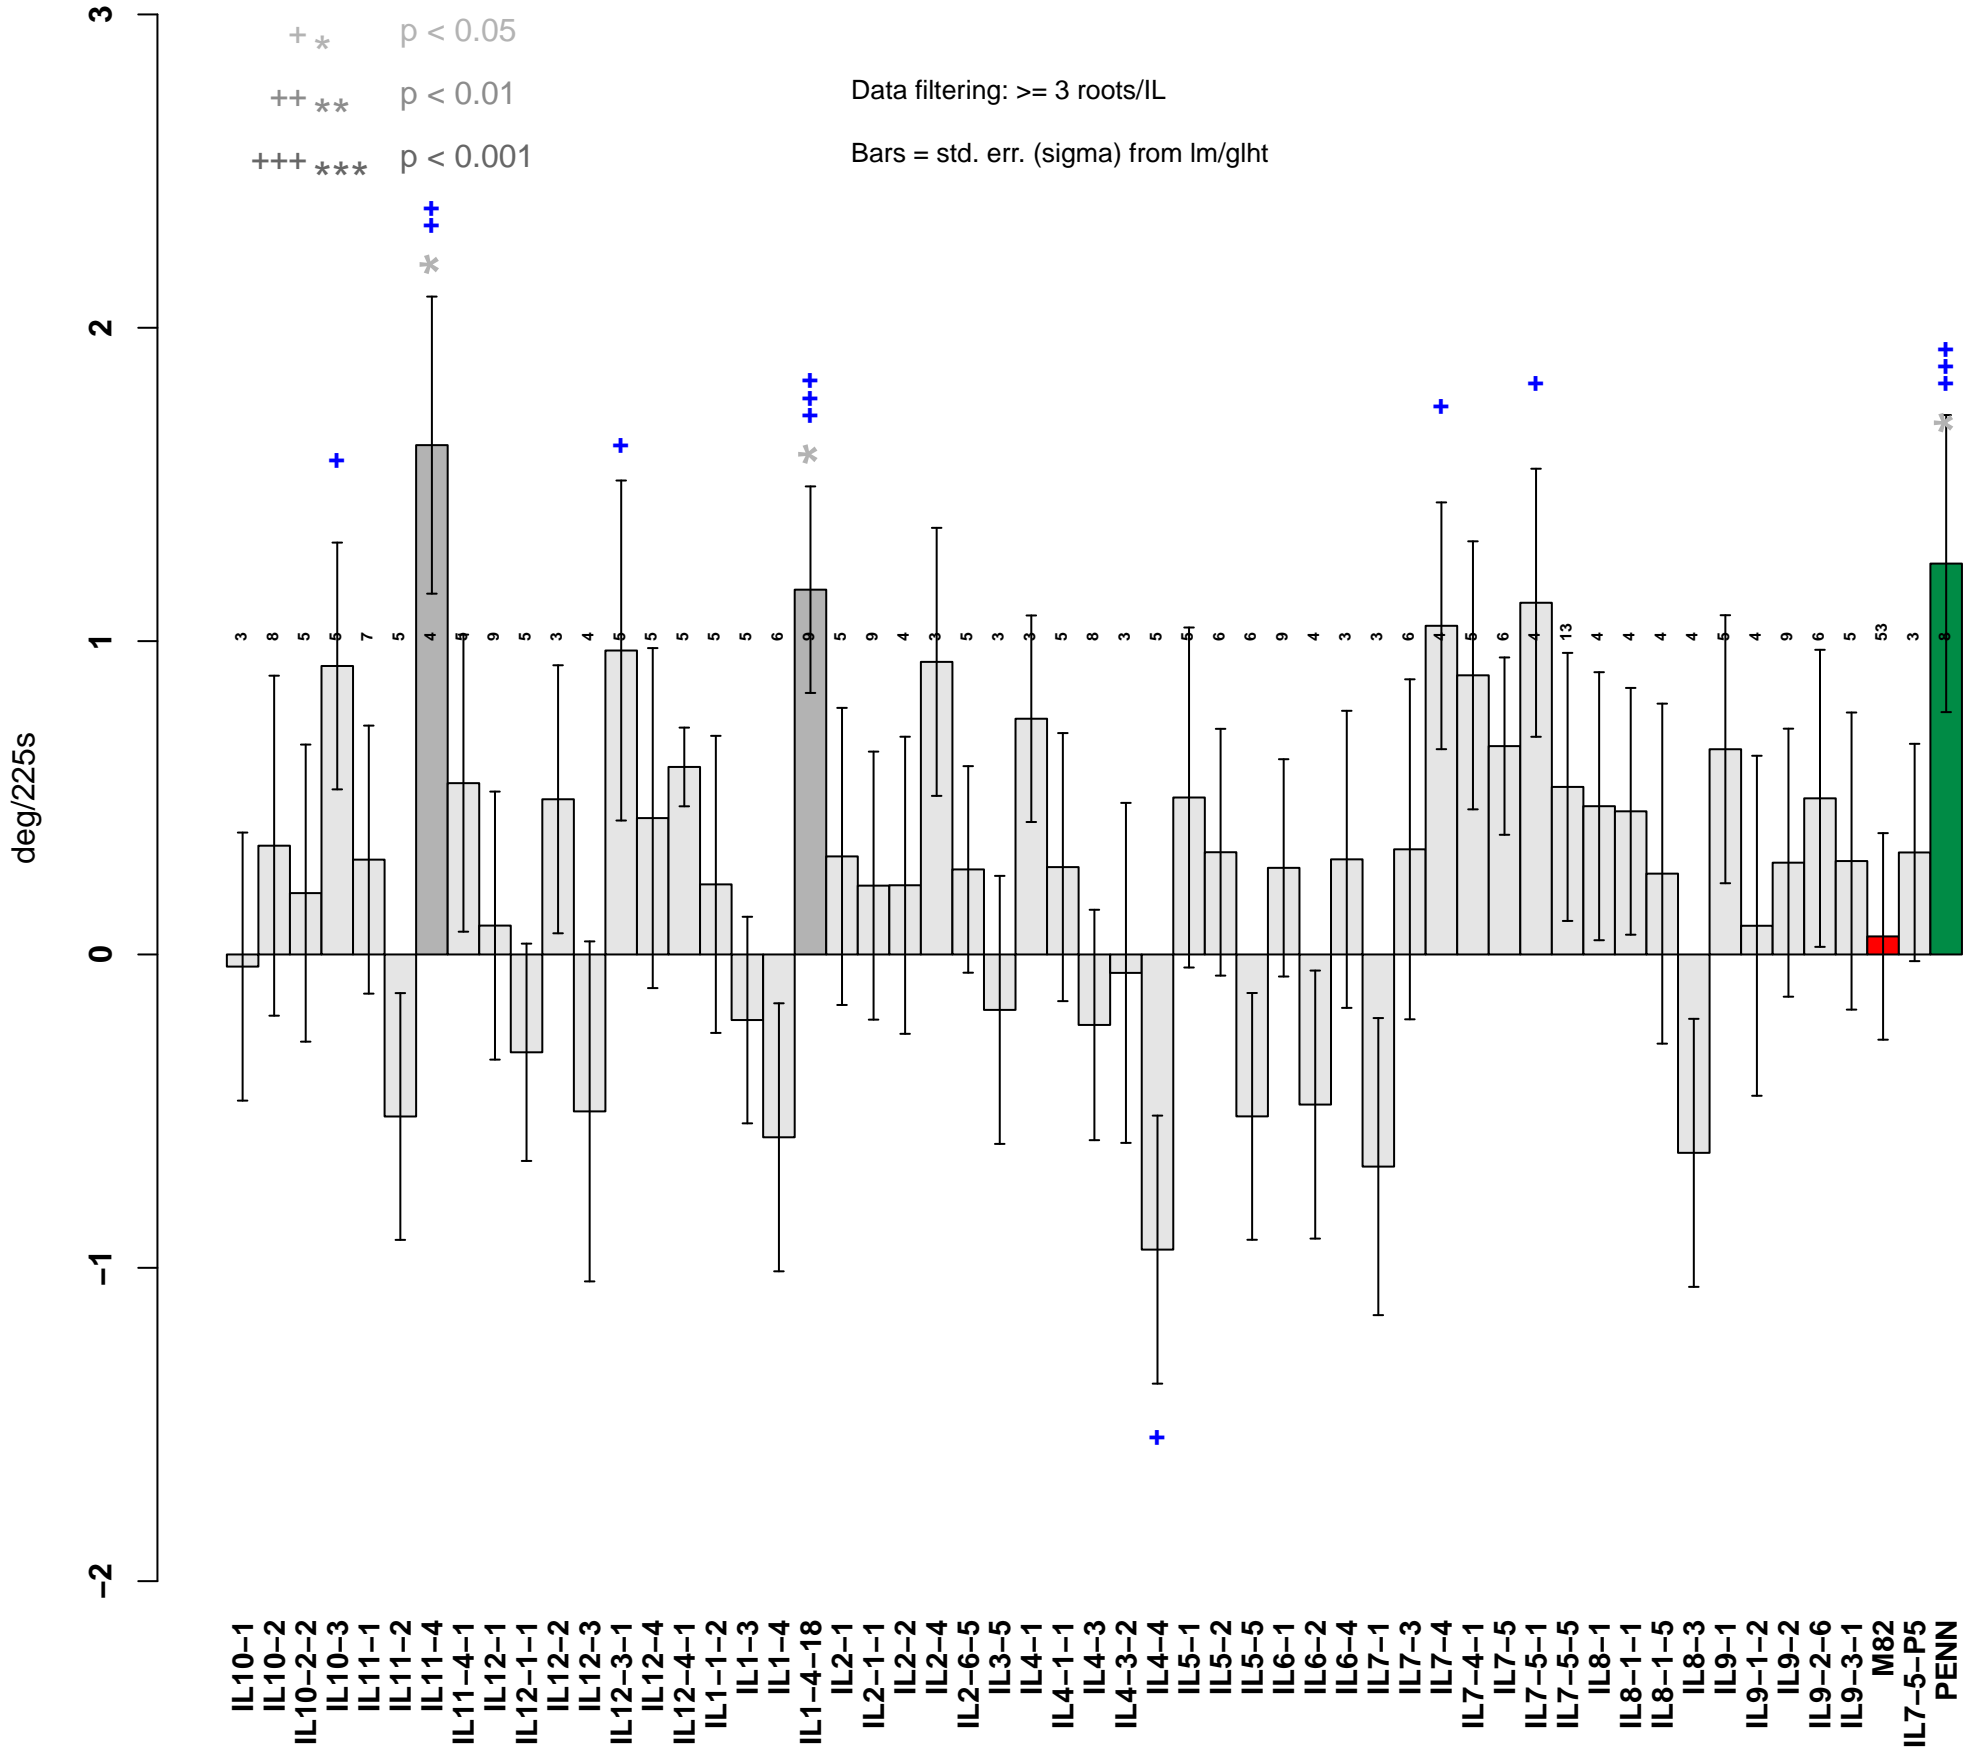

# Angle Rate Away T25

deg/225s

-1.0 -0.5 0.0 0.5 1.0 1.5 2.0

+ \* p < 0.05  
 ++ \*\* p < 0.01  
 +++ \*\*\* p < 0.001

Data filtering: >= 3 roots/IL

Bars = std. err. (sigma) from lm/glht

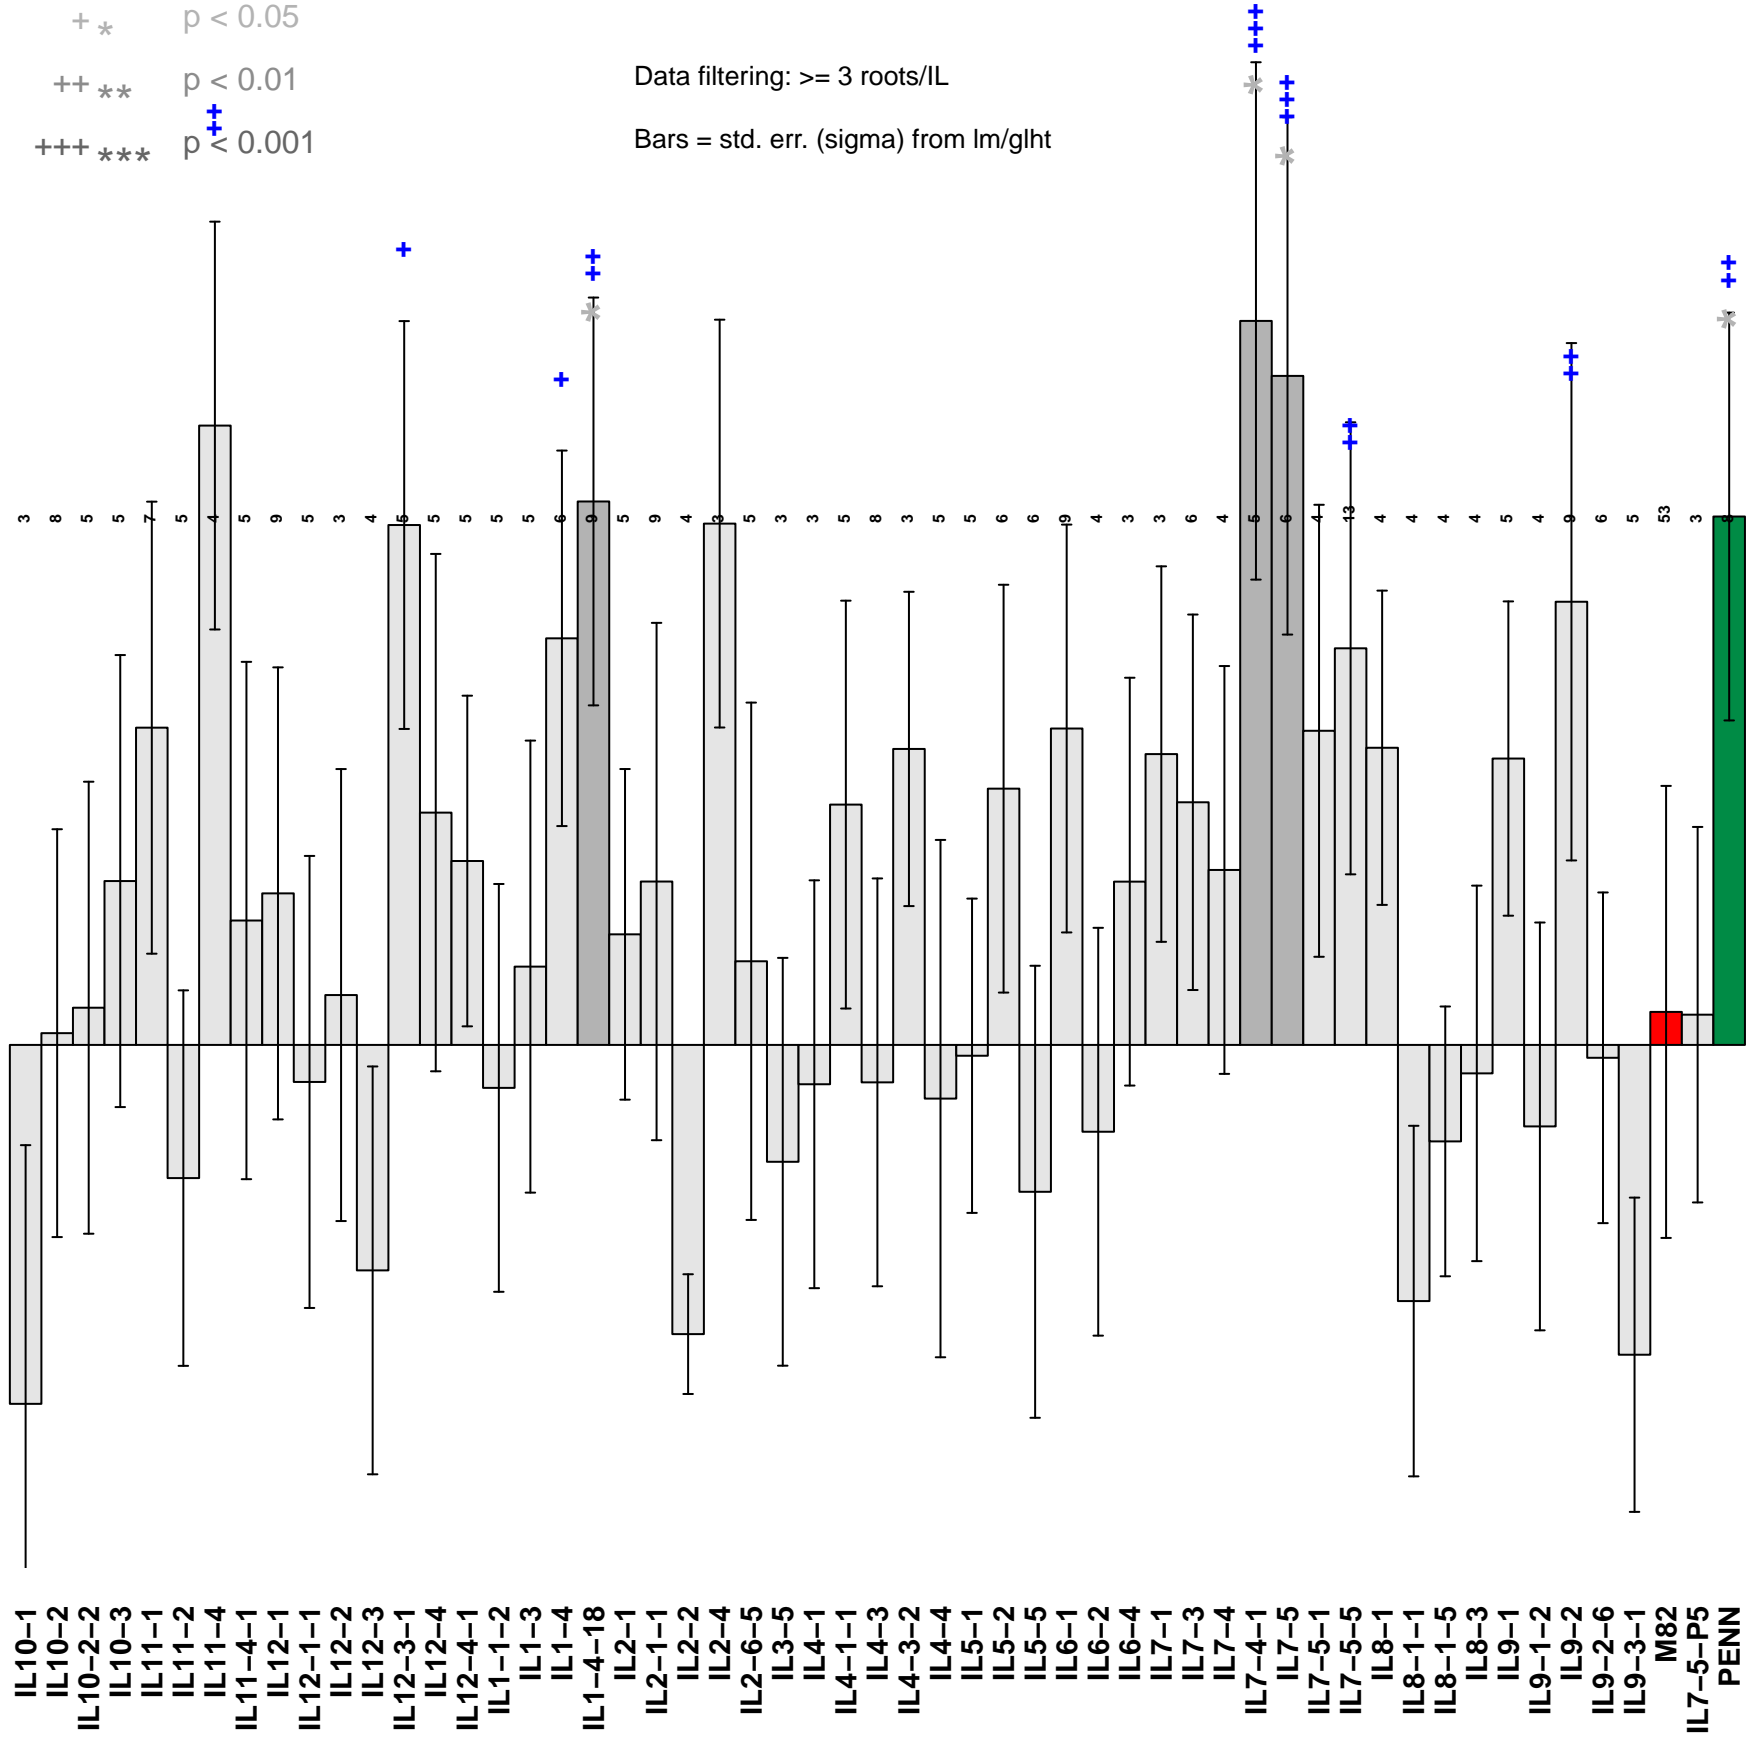

# Angle Rate Away T26

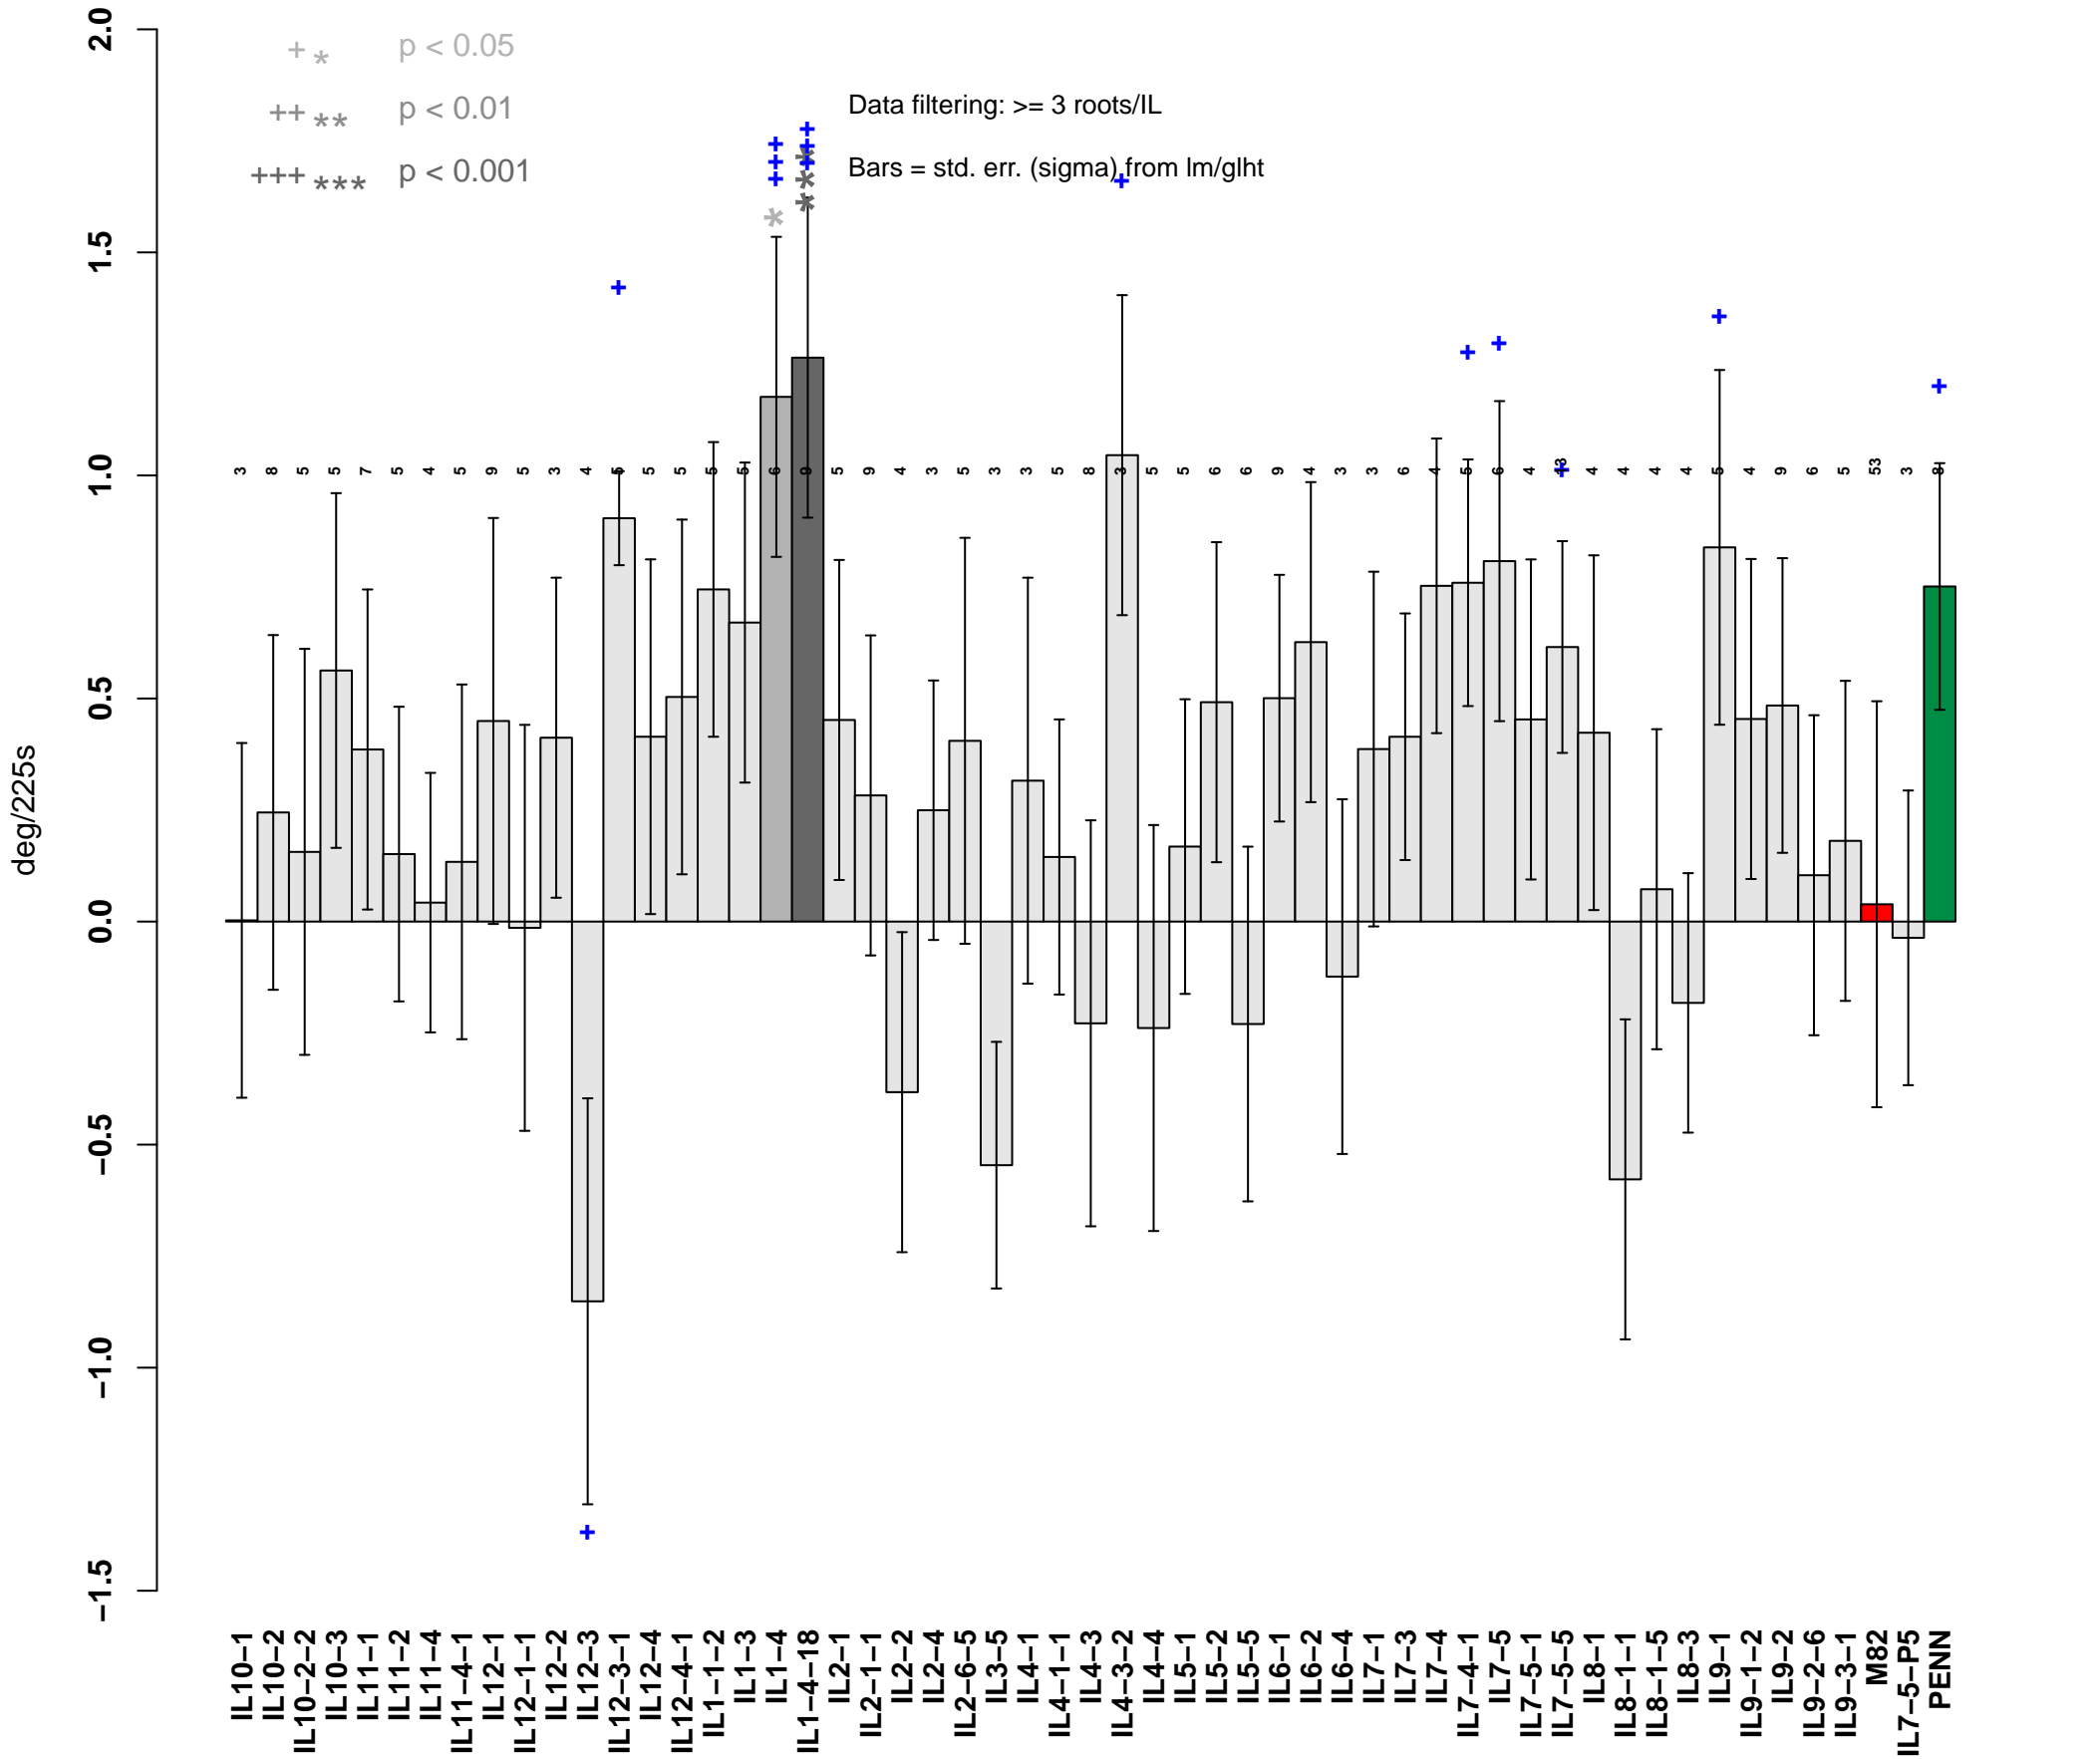

# Angle Rate Away T27

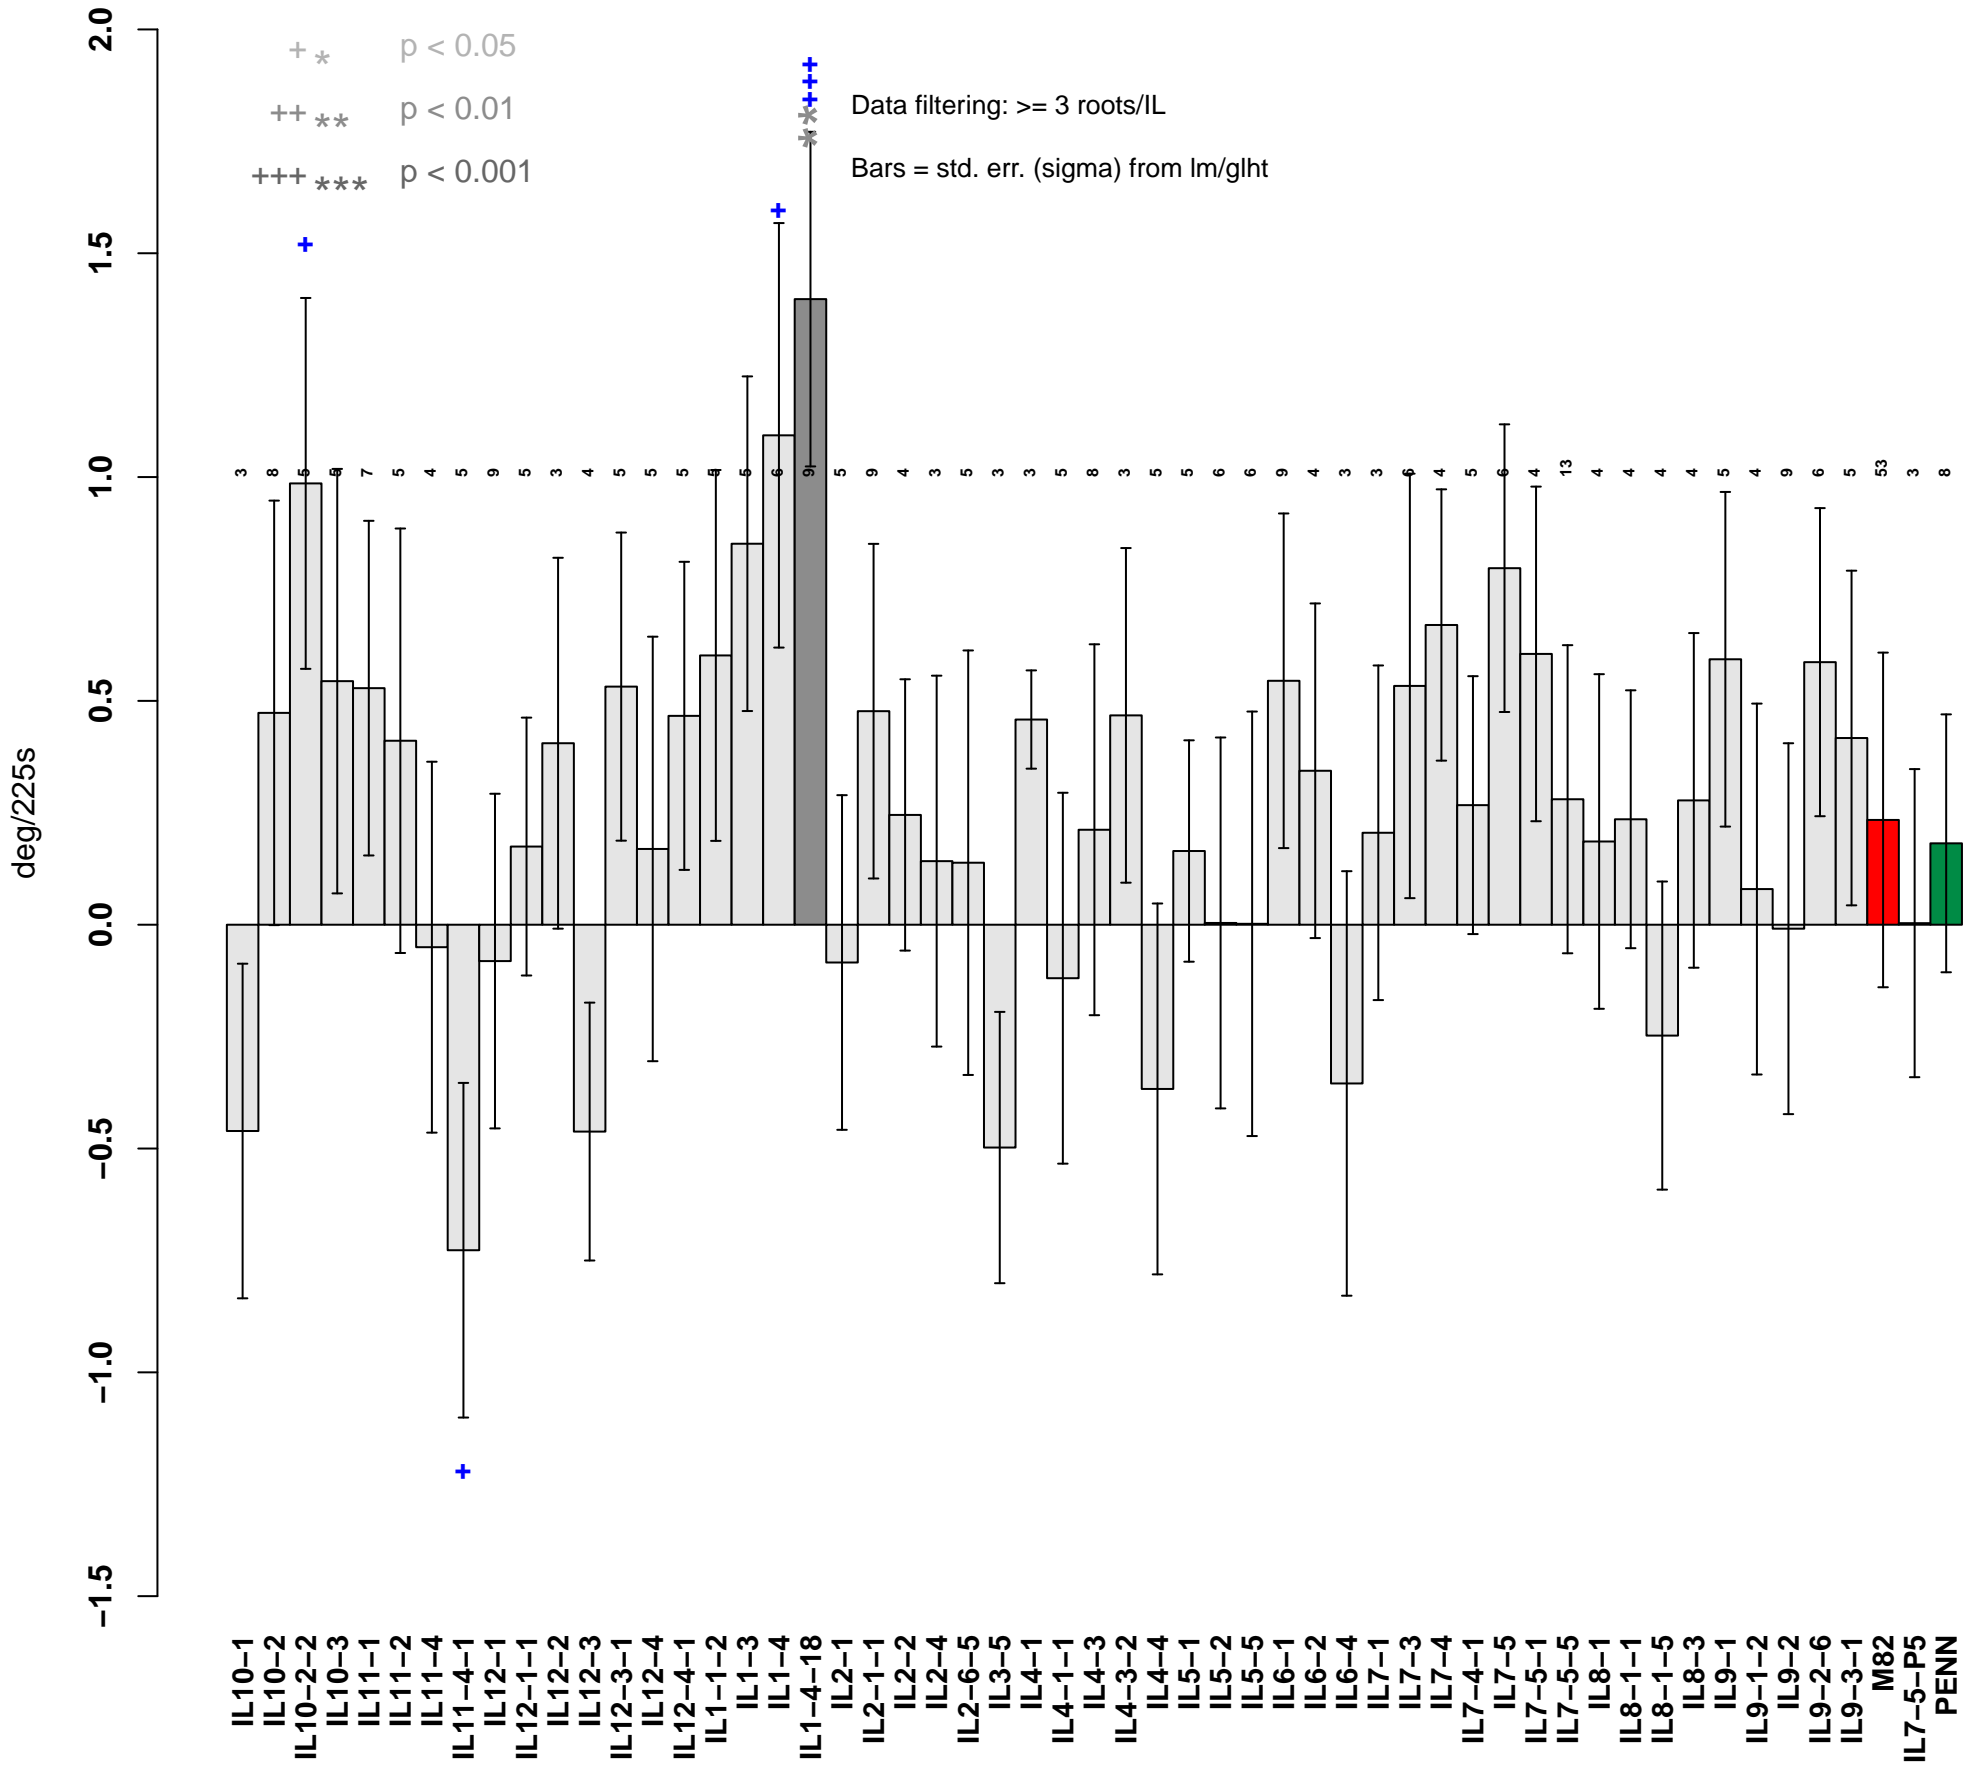

# Angle Rate Away T28

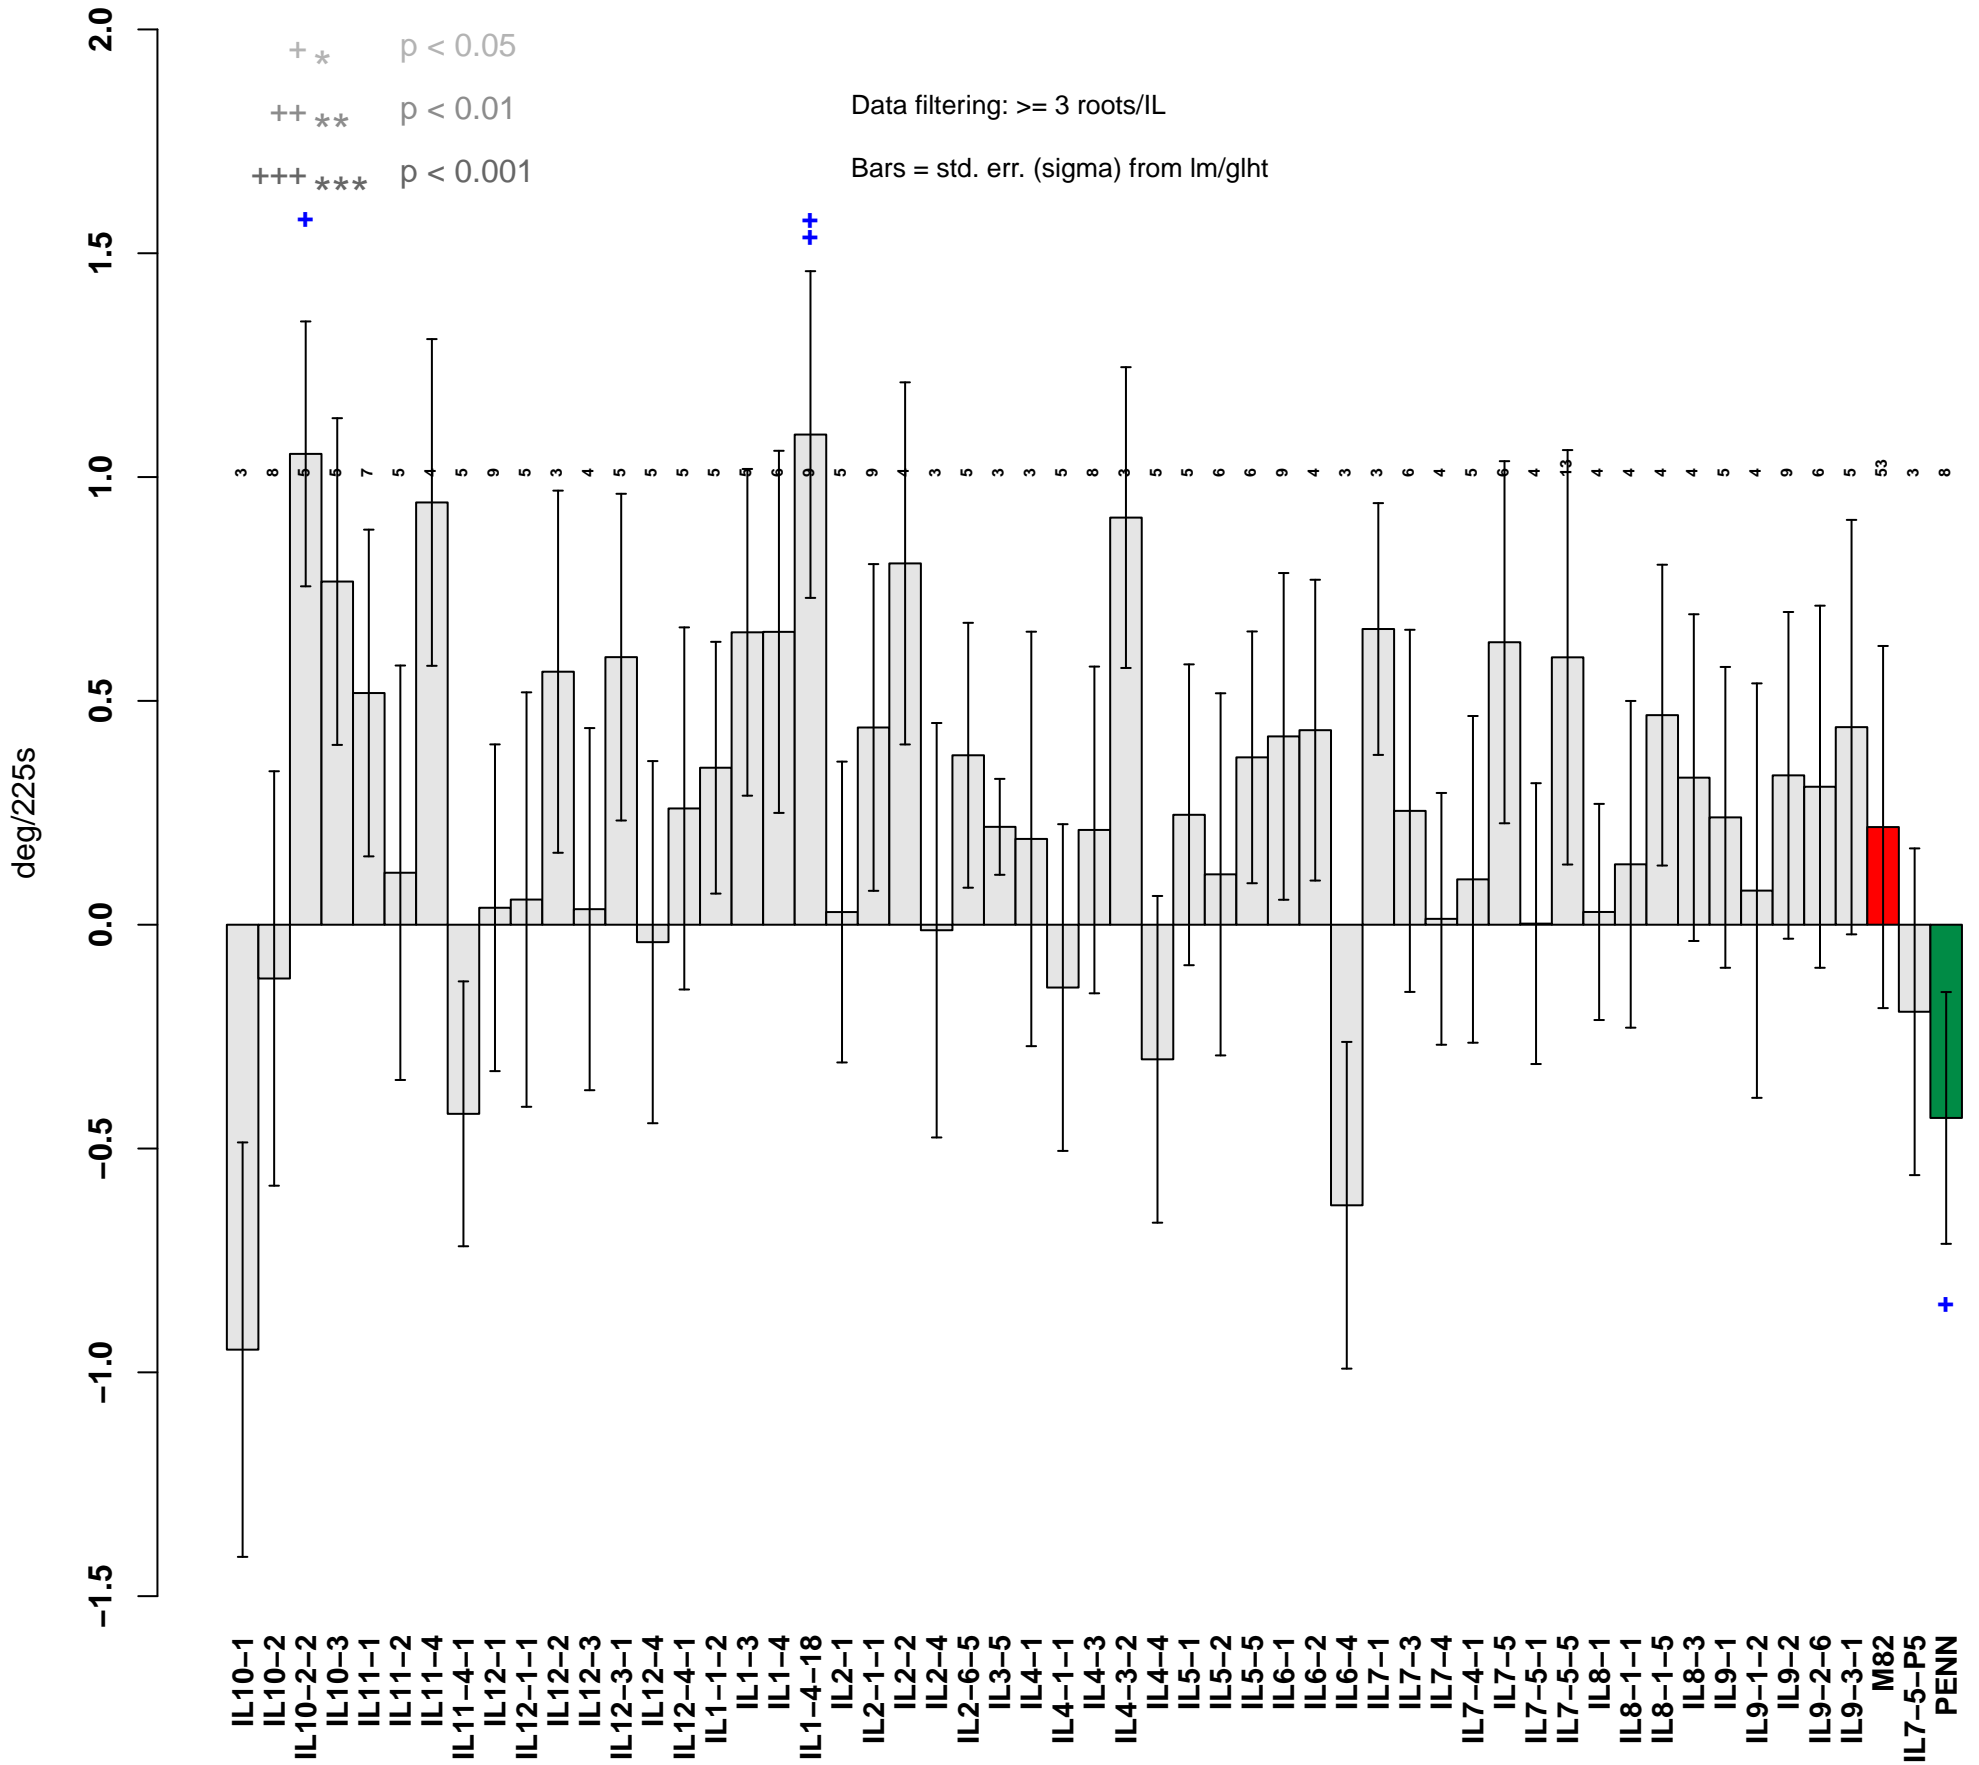

# Angle Rate Away T29

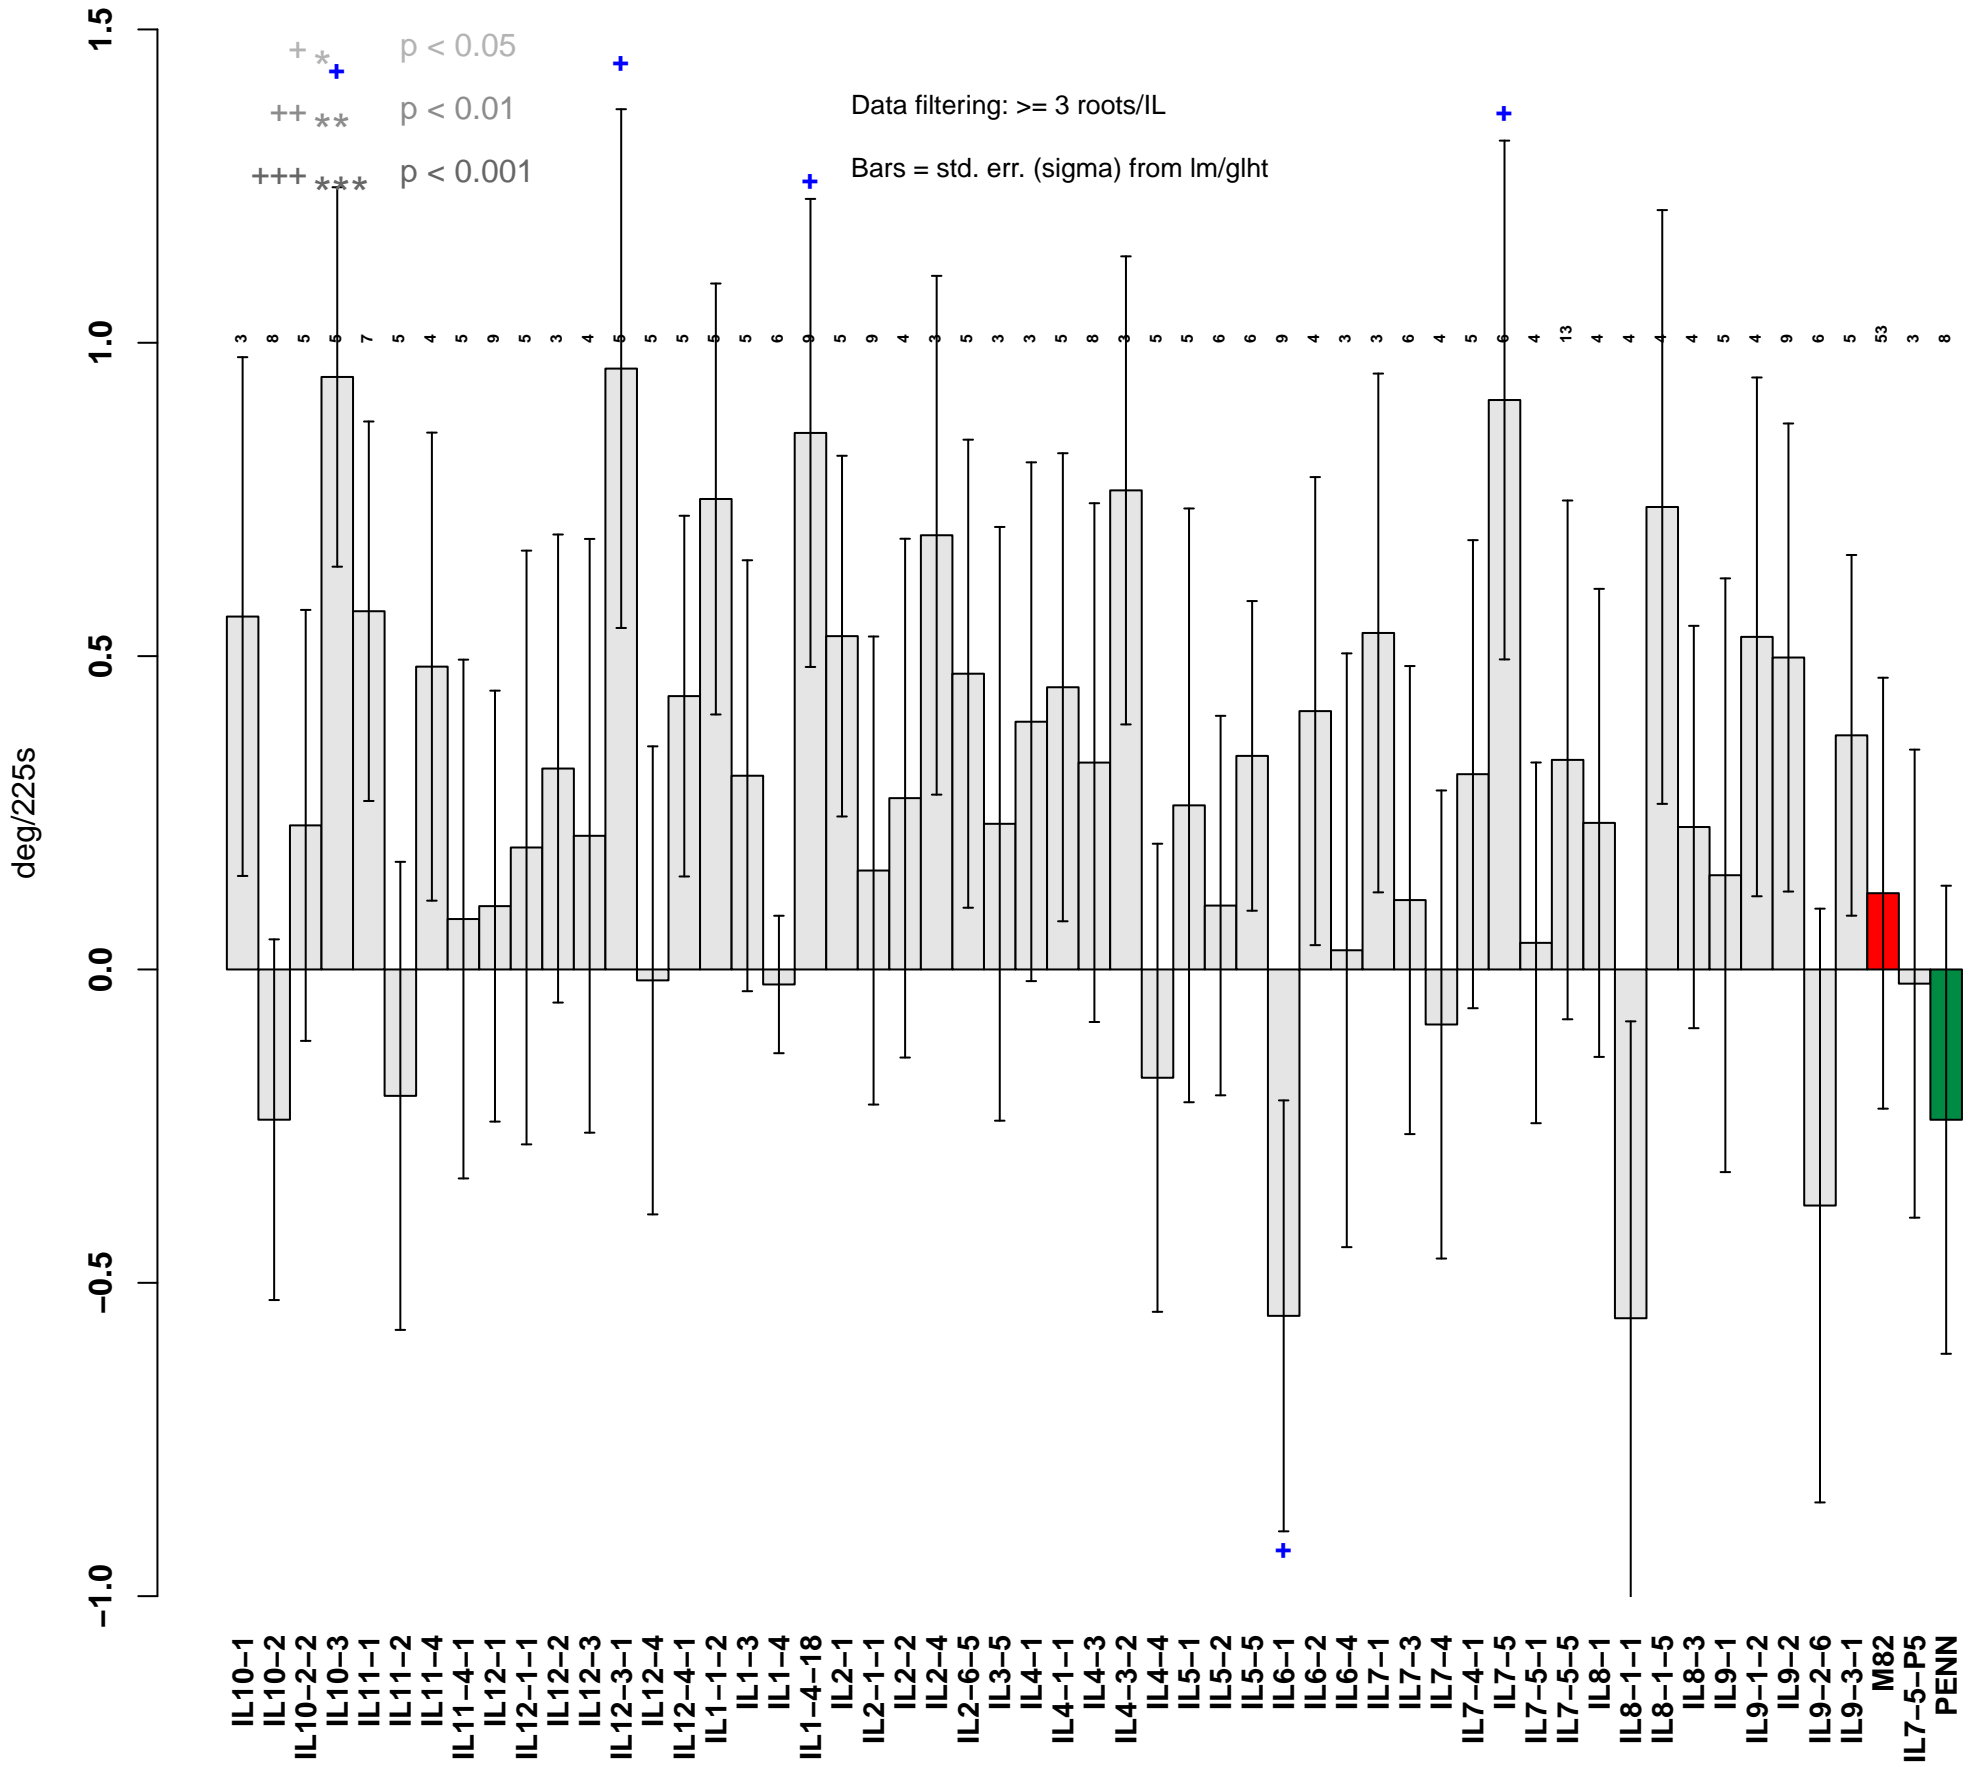

# Angle Rate Away T30

deg/225s

1.5  
1.0  
0.5  
0.0  
-0.5  
-1.0

+ \* p < 0.05  
++ \*\* p < 0.01  
+++ \*\*\* p < 0.001

+ Data filtering: >= 3 roots/IL

Bars = std. err. (sigma) from lm/glht

IL10-1  
IL10-2  
IL10-2-2  
IL10-3  
IL11-1  
IL11-2  
IL11-4  
IL11-4-1  
IL12-1  
IL12-1-1  
IL12-2  
IL12-3  
IL12-3-1  
IL12-4  
IL12-4-1  
IL1-1-2  
IL1-3  
IL1-4  
IL1-4-18  
IL2-1  
IL2-1-1  
IL2-2  
IL2-4  
IL2-6-5  
IL3-5  
IL4-1  
IL4-1-1  
IL4-3  
IL4-3-2  
IL4-4  
IL5-1  
IL5-2  
IL5-5  
IL6-1  
IL6-2  
IL6-4  
IL7-1  
IL7-3  
IL7-4  
IL7-4-1  
IL7-5  
IL7-5-1  
IL7-5-5  
IL8-1  
IL8-1-1  
IL8-1-5  
IL8-3  
IL9-1  
IL9-1-2  
IL9-2  
IL9-2-6  
IL9-3-1  
M82  
PENN

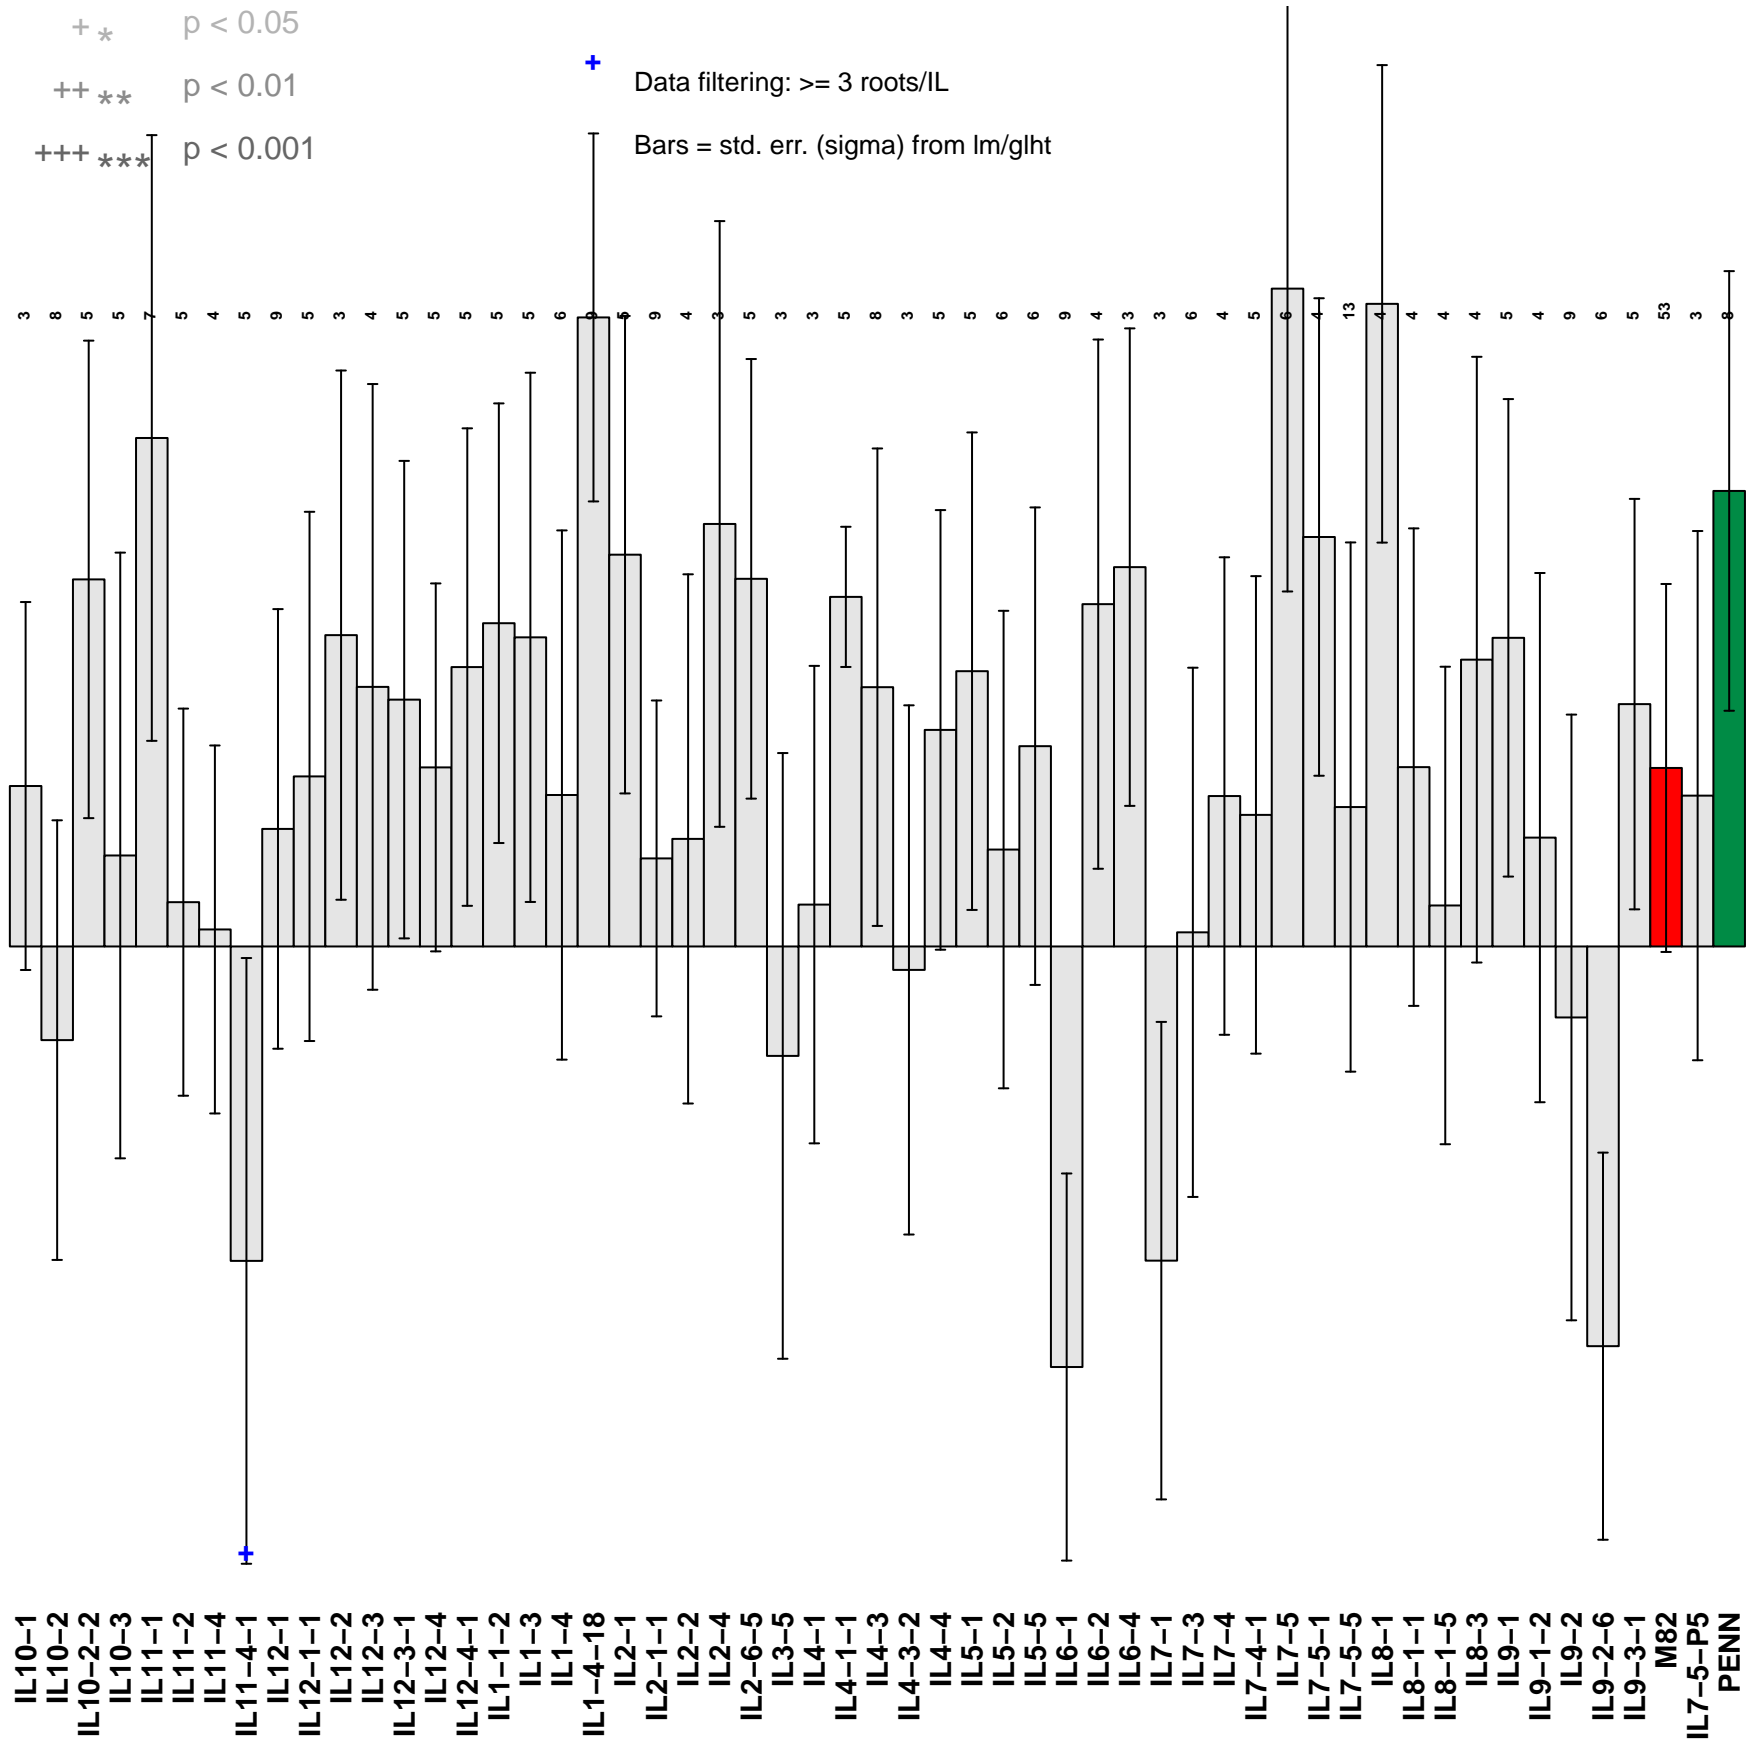

# Angle Rate Away T31

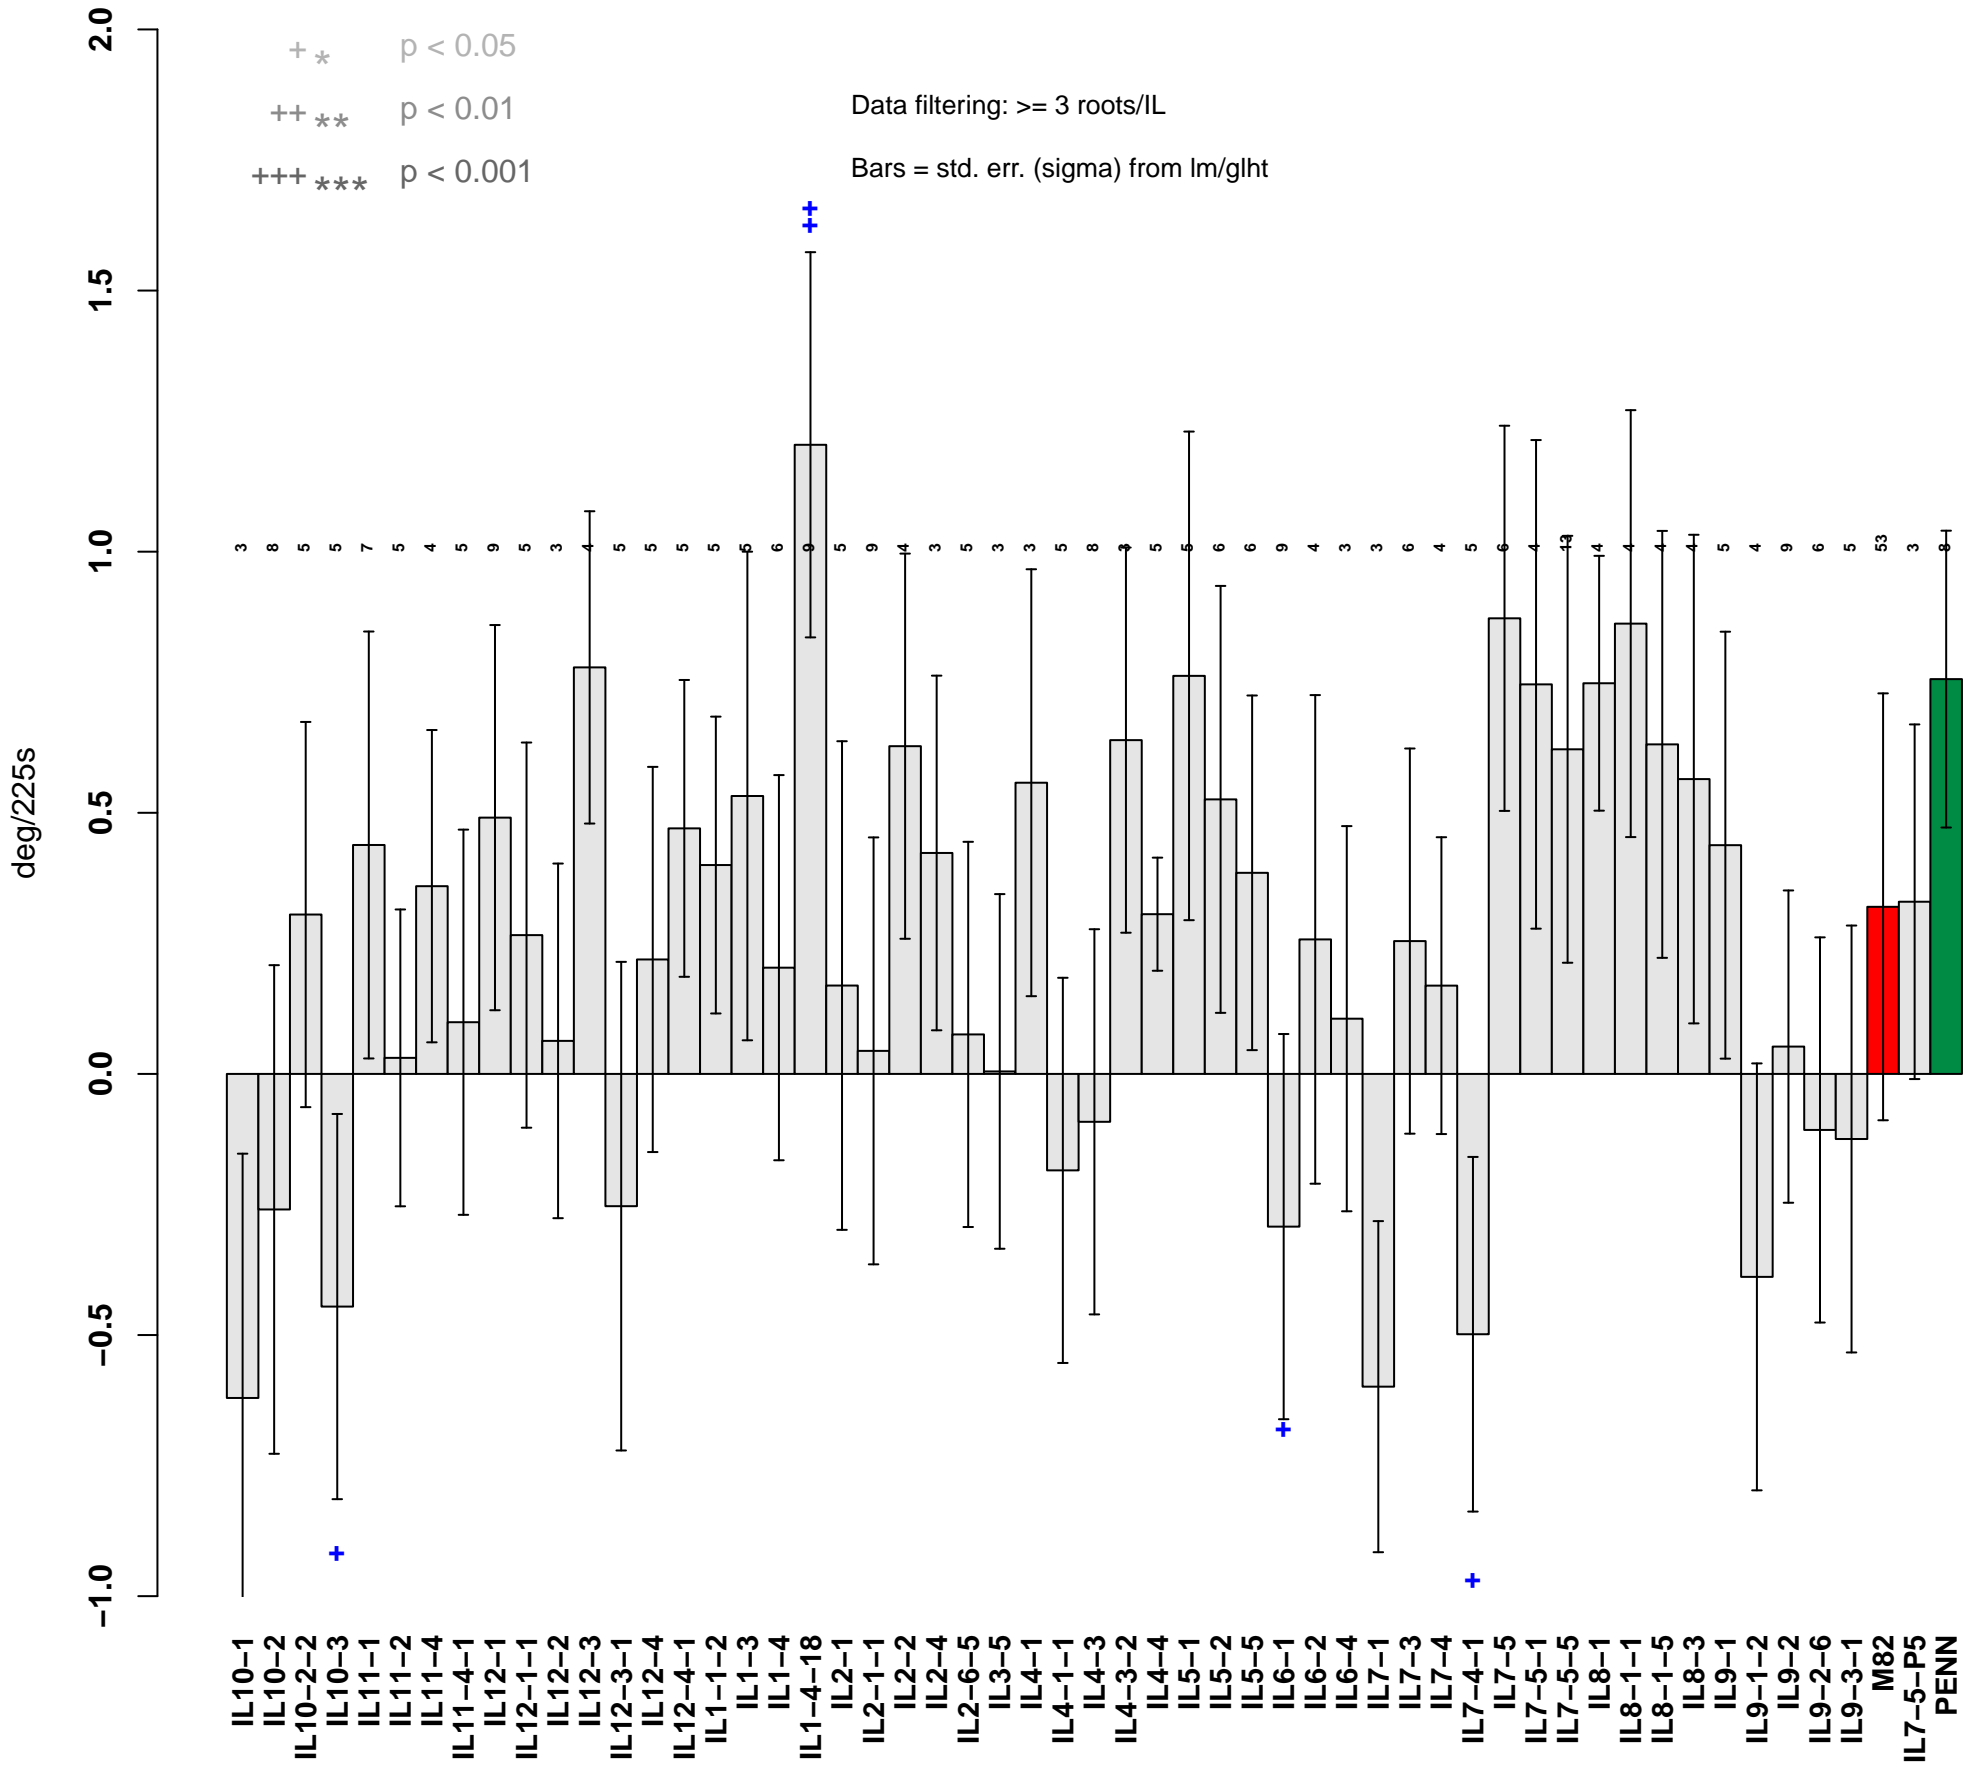



# Angle Rate Away T32

deg/225s

2.0  
1.5  
1.0  
0.5  
0.0  
-0.5

+ \* p < 0.05  
++ \*\* p < 0.01  
+++ \*\*\* p < 0.001

Data filtering: >= 3 roots/IL

Bars = std. err. (sigma) from lm/glht

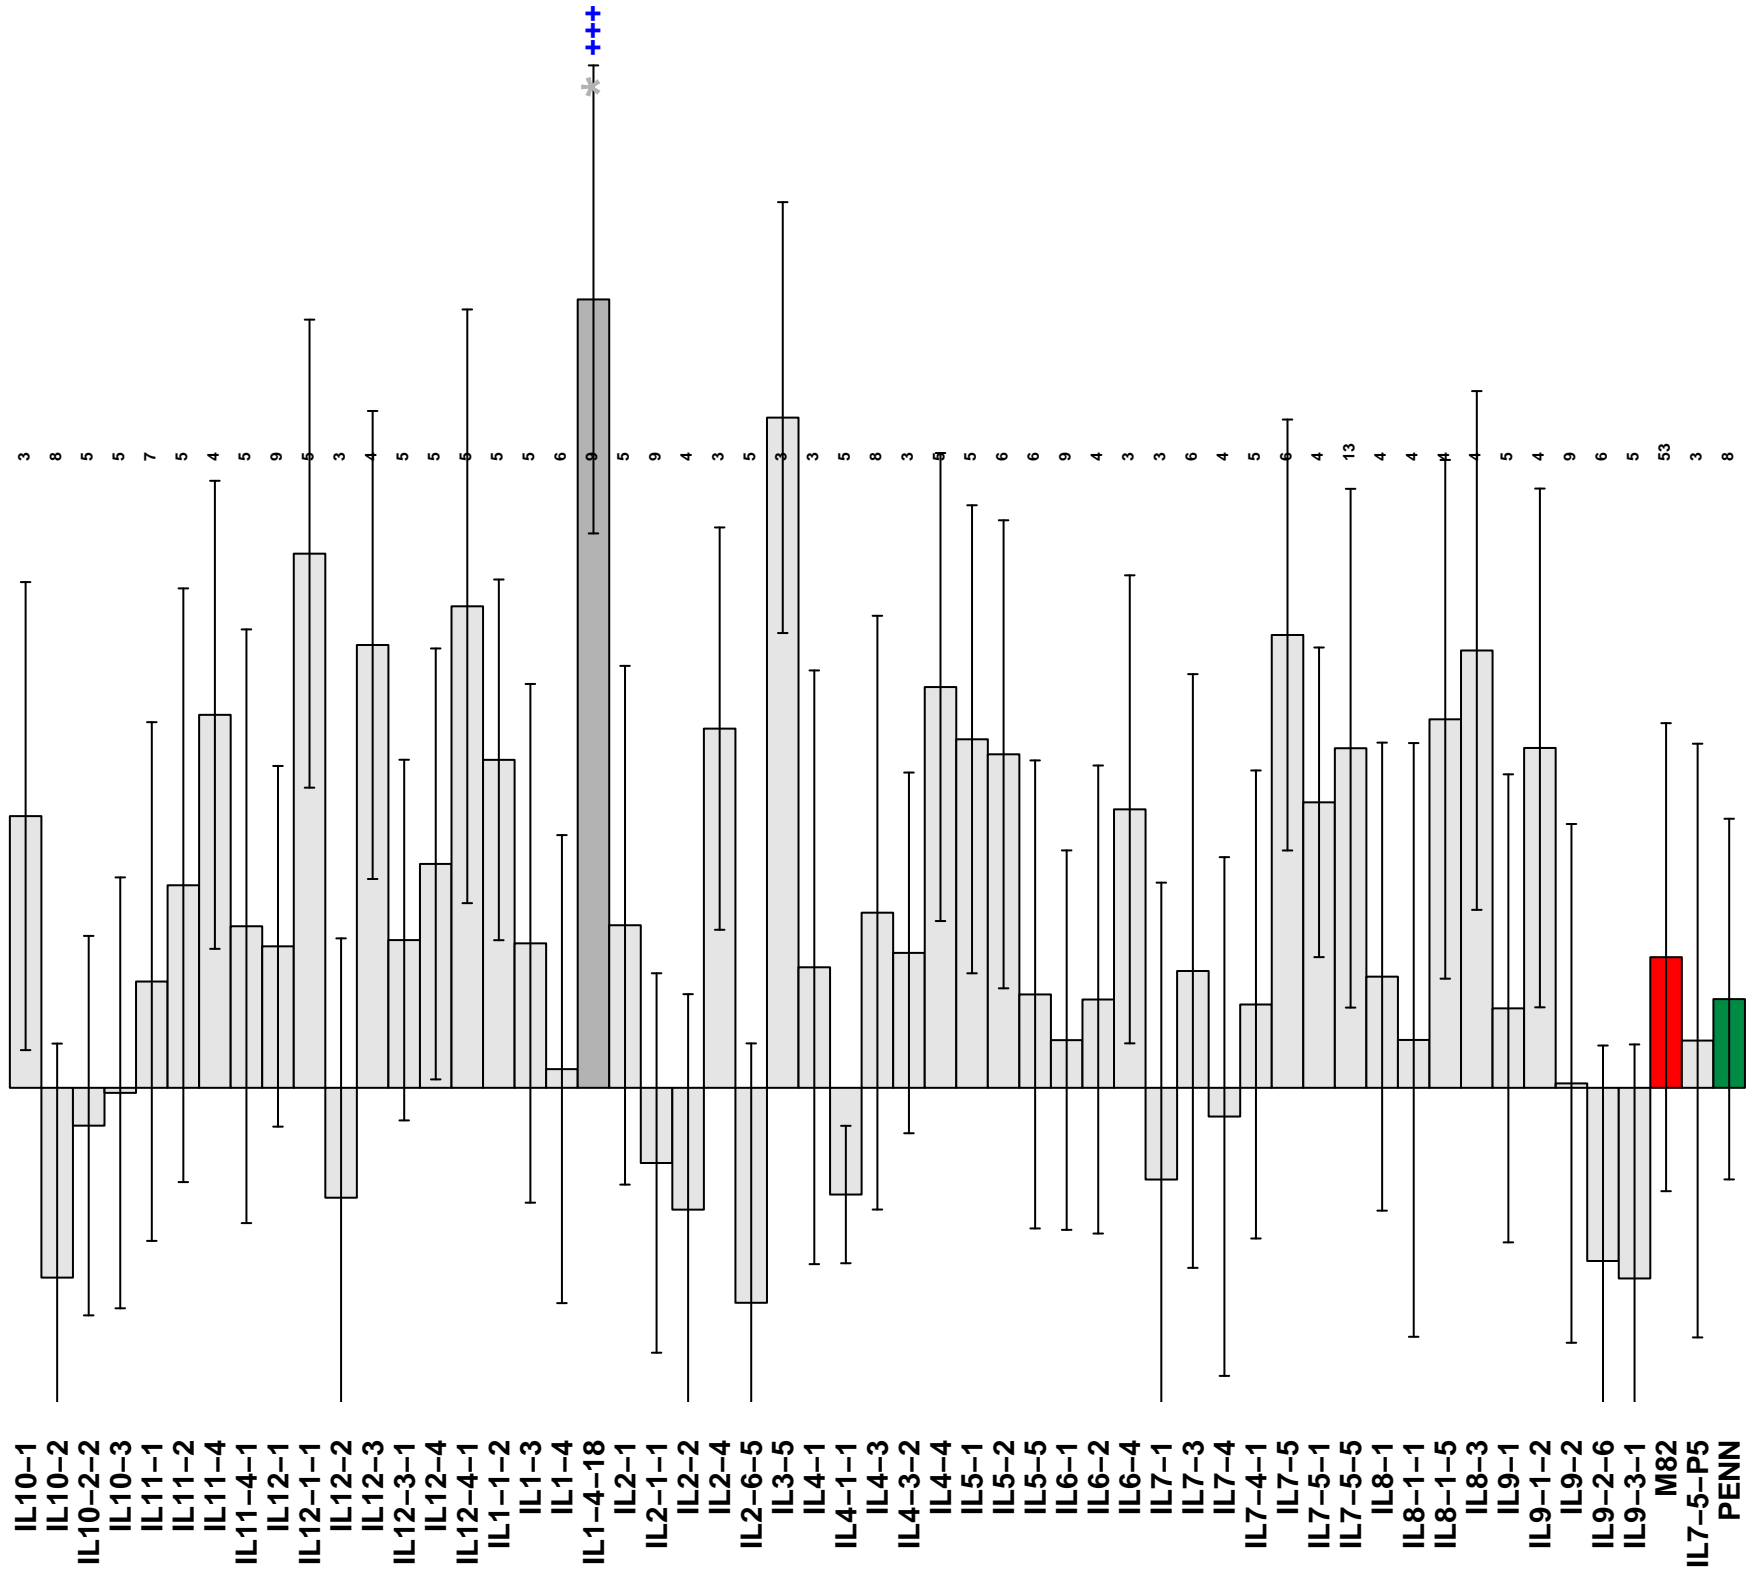

# Angle Rate Away T33

deg/225s

-2 -1 0 1 2 3

+ \* p < 0.05  
 ++ \*\* p < 0.01  
 +++ \*\*\* p < 0.001

Data filtering: >= 3 roots/IL

Bars = std. err. (sigma) from lm/glht

IL10-1  
 IL10-2  
 IL10-2-2  
 IL10-3  
 IL11-1  
 IL11-2  
 IL11-4  
 IL11-4-1  
 IL12-1  
 IL12-1-1  
 IL12-2  
 IL12-3  
 IL12-3-1  
 IL12-4  
 IL12-4-1  
 IL1-1-2  
 IL1-3  
 IL1-4  
 IL1-4-18  
 IL2-1  
 IL2-1-1  
 IL2-2  
 IL2-4  
 IL2-6-5  
 IL3-5  
 IL4-1  
 IL4-1-1  
 IL4-3  
 IL4-3-2  
 IL4-4  
 IL5-1  
 IL5-2  
 IL5-5  
 IL6-1  
 IL6-2  
 IL6-4  
 IL7-1  
 IL7-3  
 IL7-4  
 IL7-4-1  
 IL7-5  
 IL7-5-1  
 IL7-5-5  
 IL8-1  
 IL8-1-1  
 IL8-1-5  
 IL8-3  
 IL9-1  
 IL9-1-2  
 IL9-2  
 IL9-2-6  
 IL9-3-1  
 M82  
 IL7-5-P5  
 PENN

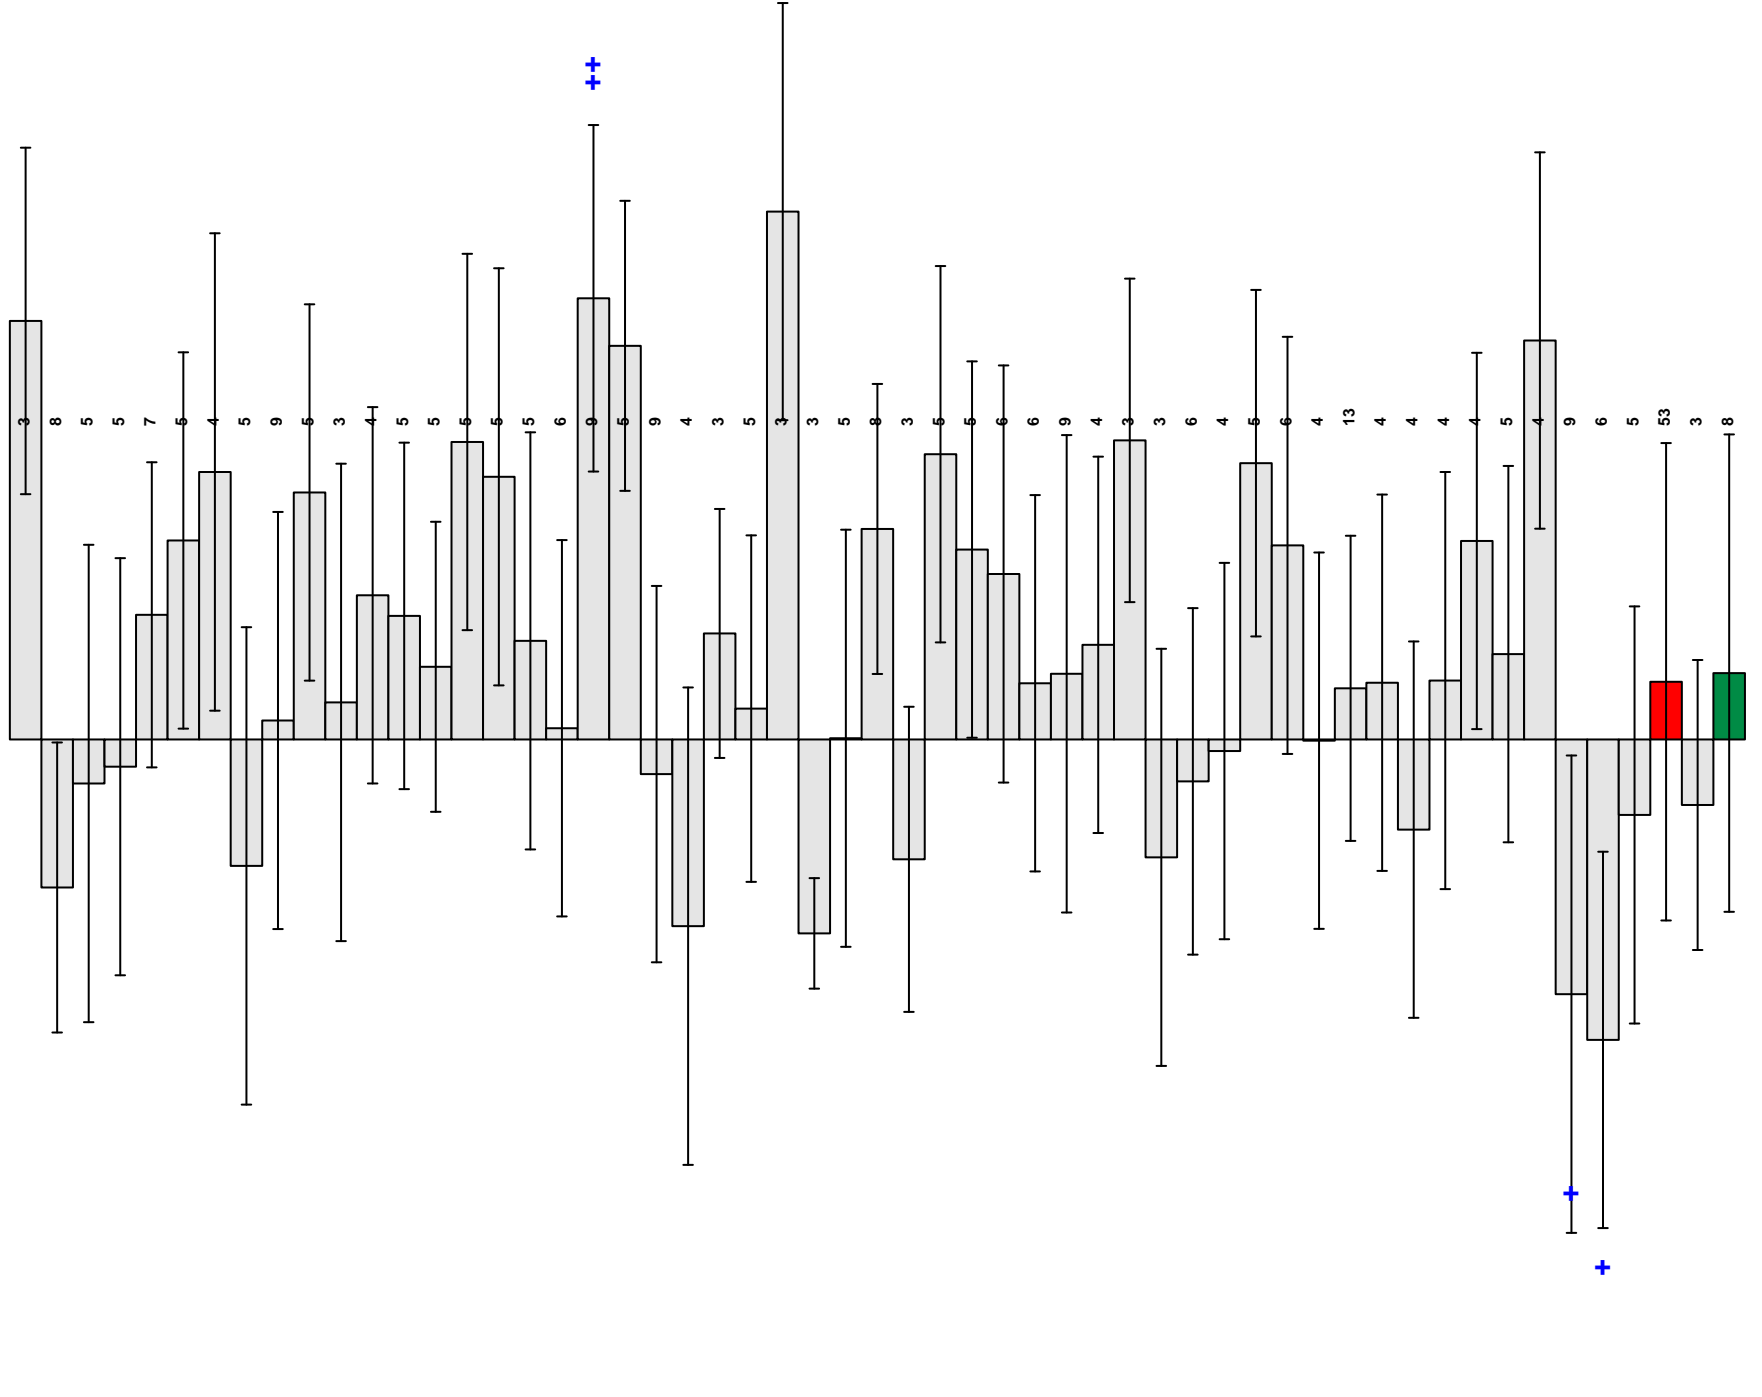

Supplement: Supplementary file 6 [file 2]
