# Supplementary material
Source: publisher figshare collection journal article supplement (https://gsajournals.figshare.com/articles/dataset/_/7237562)

# Angle Thru T0

degrees

40  
30  
20  
10  
0

+\* p < 0.05  
+\*+\* p < 0.01  
+\*+\*+\* p < 0.001

Data filtering: >= 3 roots/IL

Bars = std. err. (sigma) from lm/glht

IL10-1-1  
IL11-2  
IL11-4-1  
IL12-1  
IL12-1-1  
IL12-2  
IL12-3  
IL12-3-1  
IL12-4  
IL1-4  
IL1-4-18  
IL2-1  
IL2-4  
IL3-5  
IL4-1  
IL4-1-1  
IL4-3  
IL4-3-2  
IL4-4  
IL5-1  
IL5-2  
IL5-3  
IL5-5  
IL6-1  
IL6-2  
IL7-1  
IL7-4  
IL7-5  
IL7-5-1  
IL7-5-5  
IL8-1  
IL8-1-1  
IL8-1-5  
IL8-3  
IL9-1  
IL9-1-2  
IL9-2  
IL9-3-1  
M82  
IL7-5-P5  
PENN

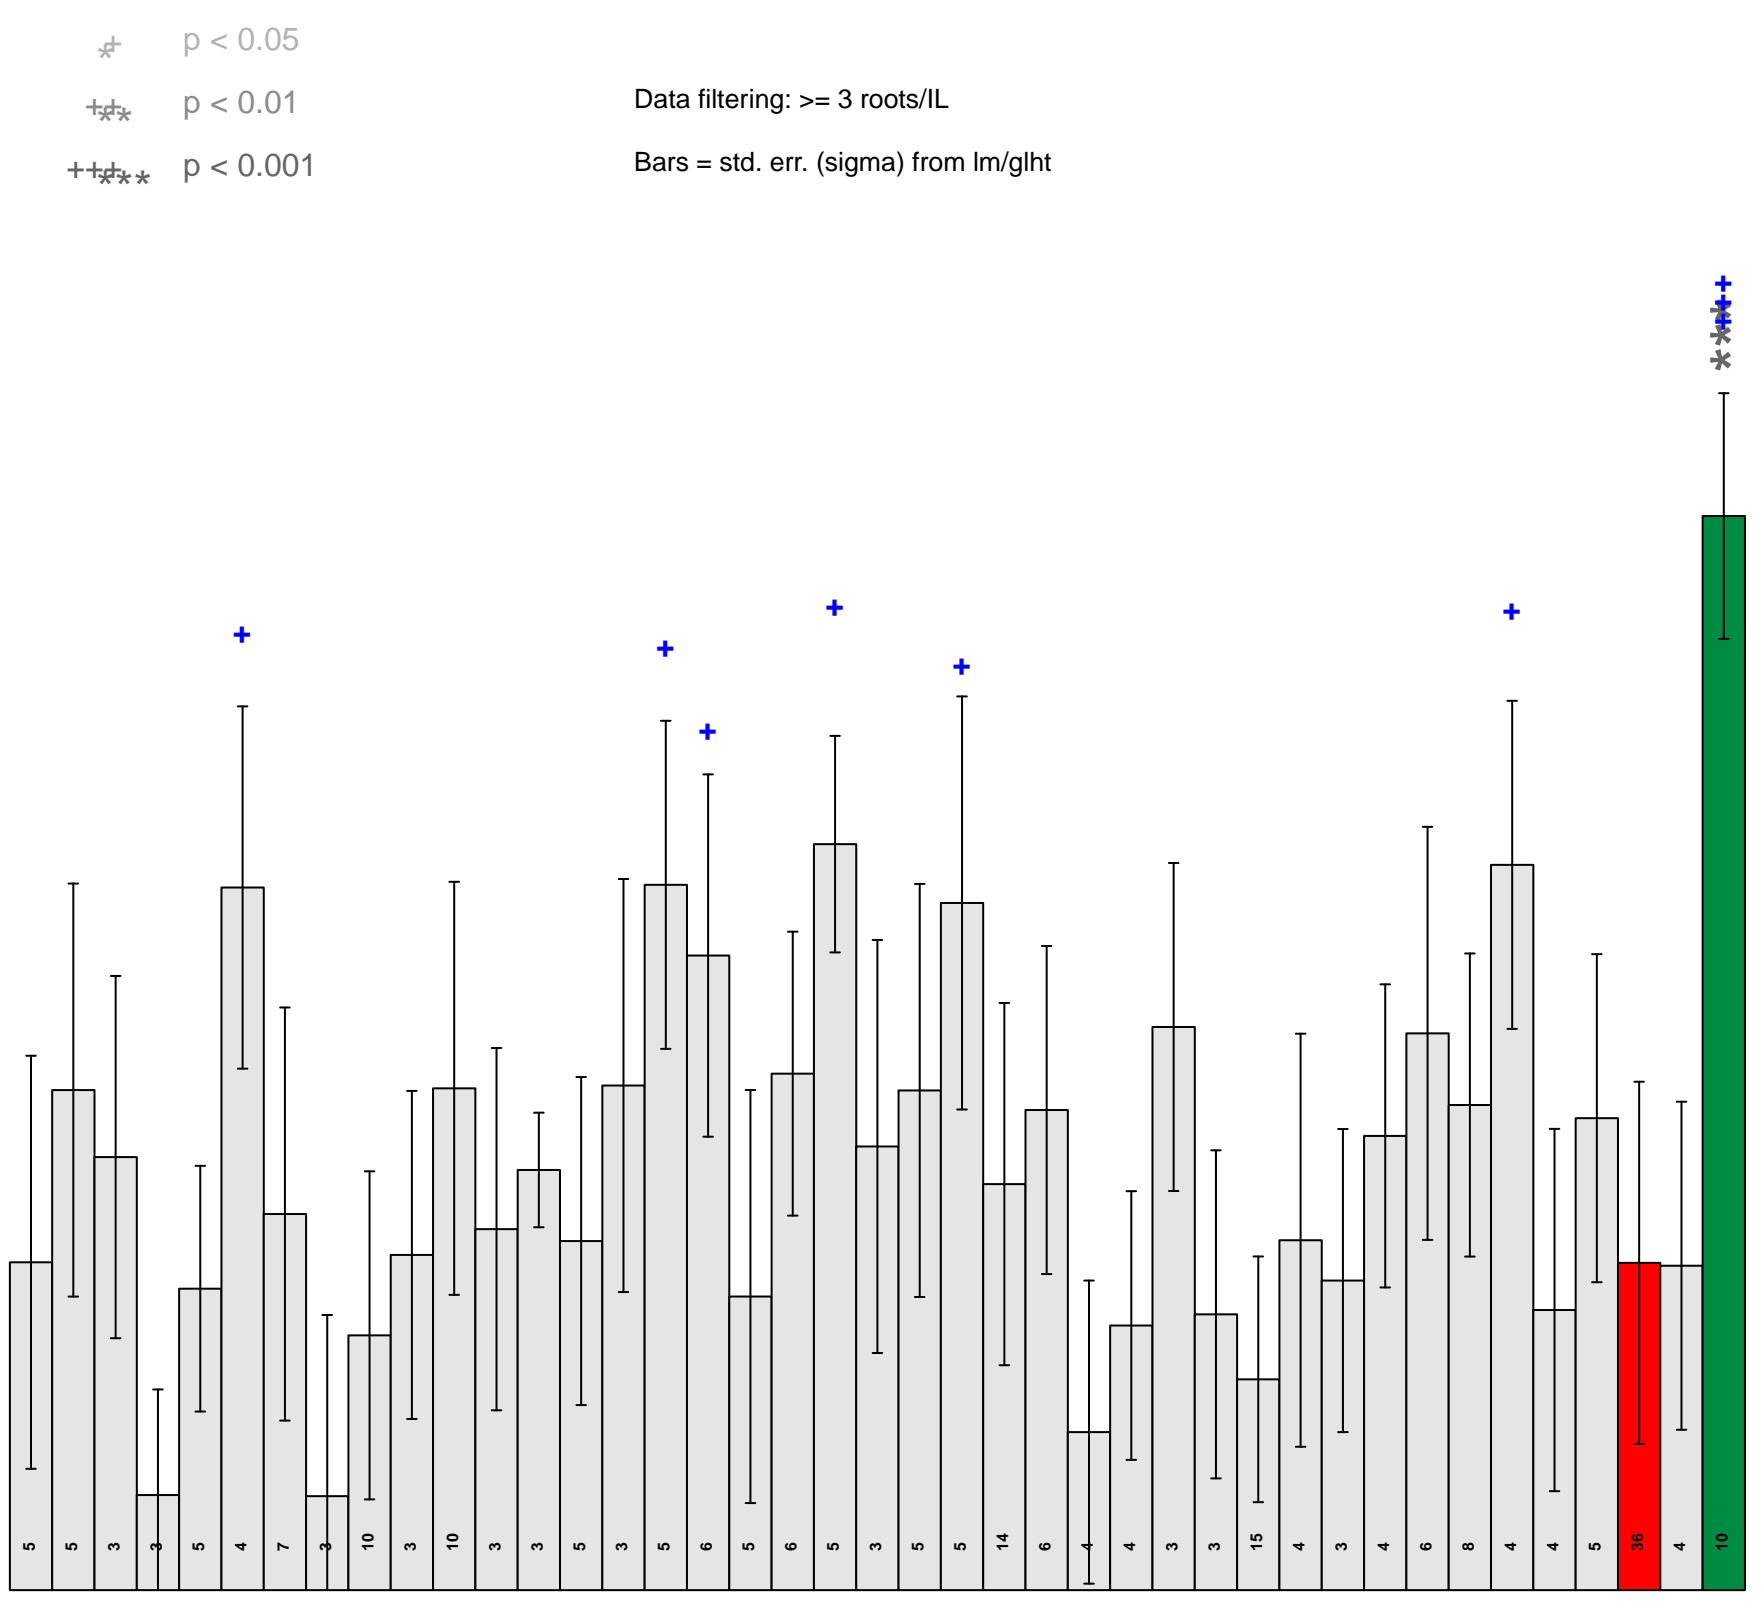

# Angle Thru T1

degrees

40  
30  
20  
10  
0

+\* p < 0.05  
+\*+\* p < 0.01  
+\*+\*+\* p < 0.001

Data filtering: >= 3 roots/IL

Bars = std. err. (sigma) from lm/glht

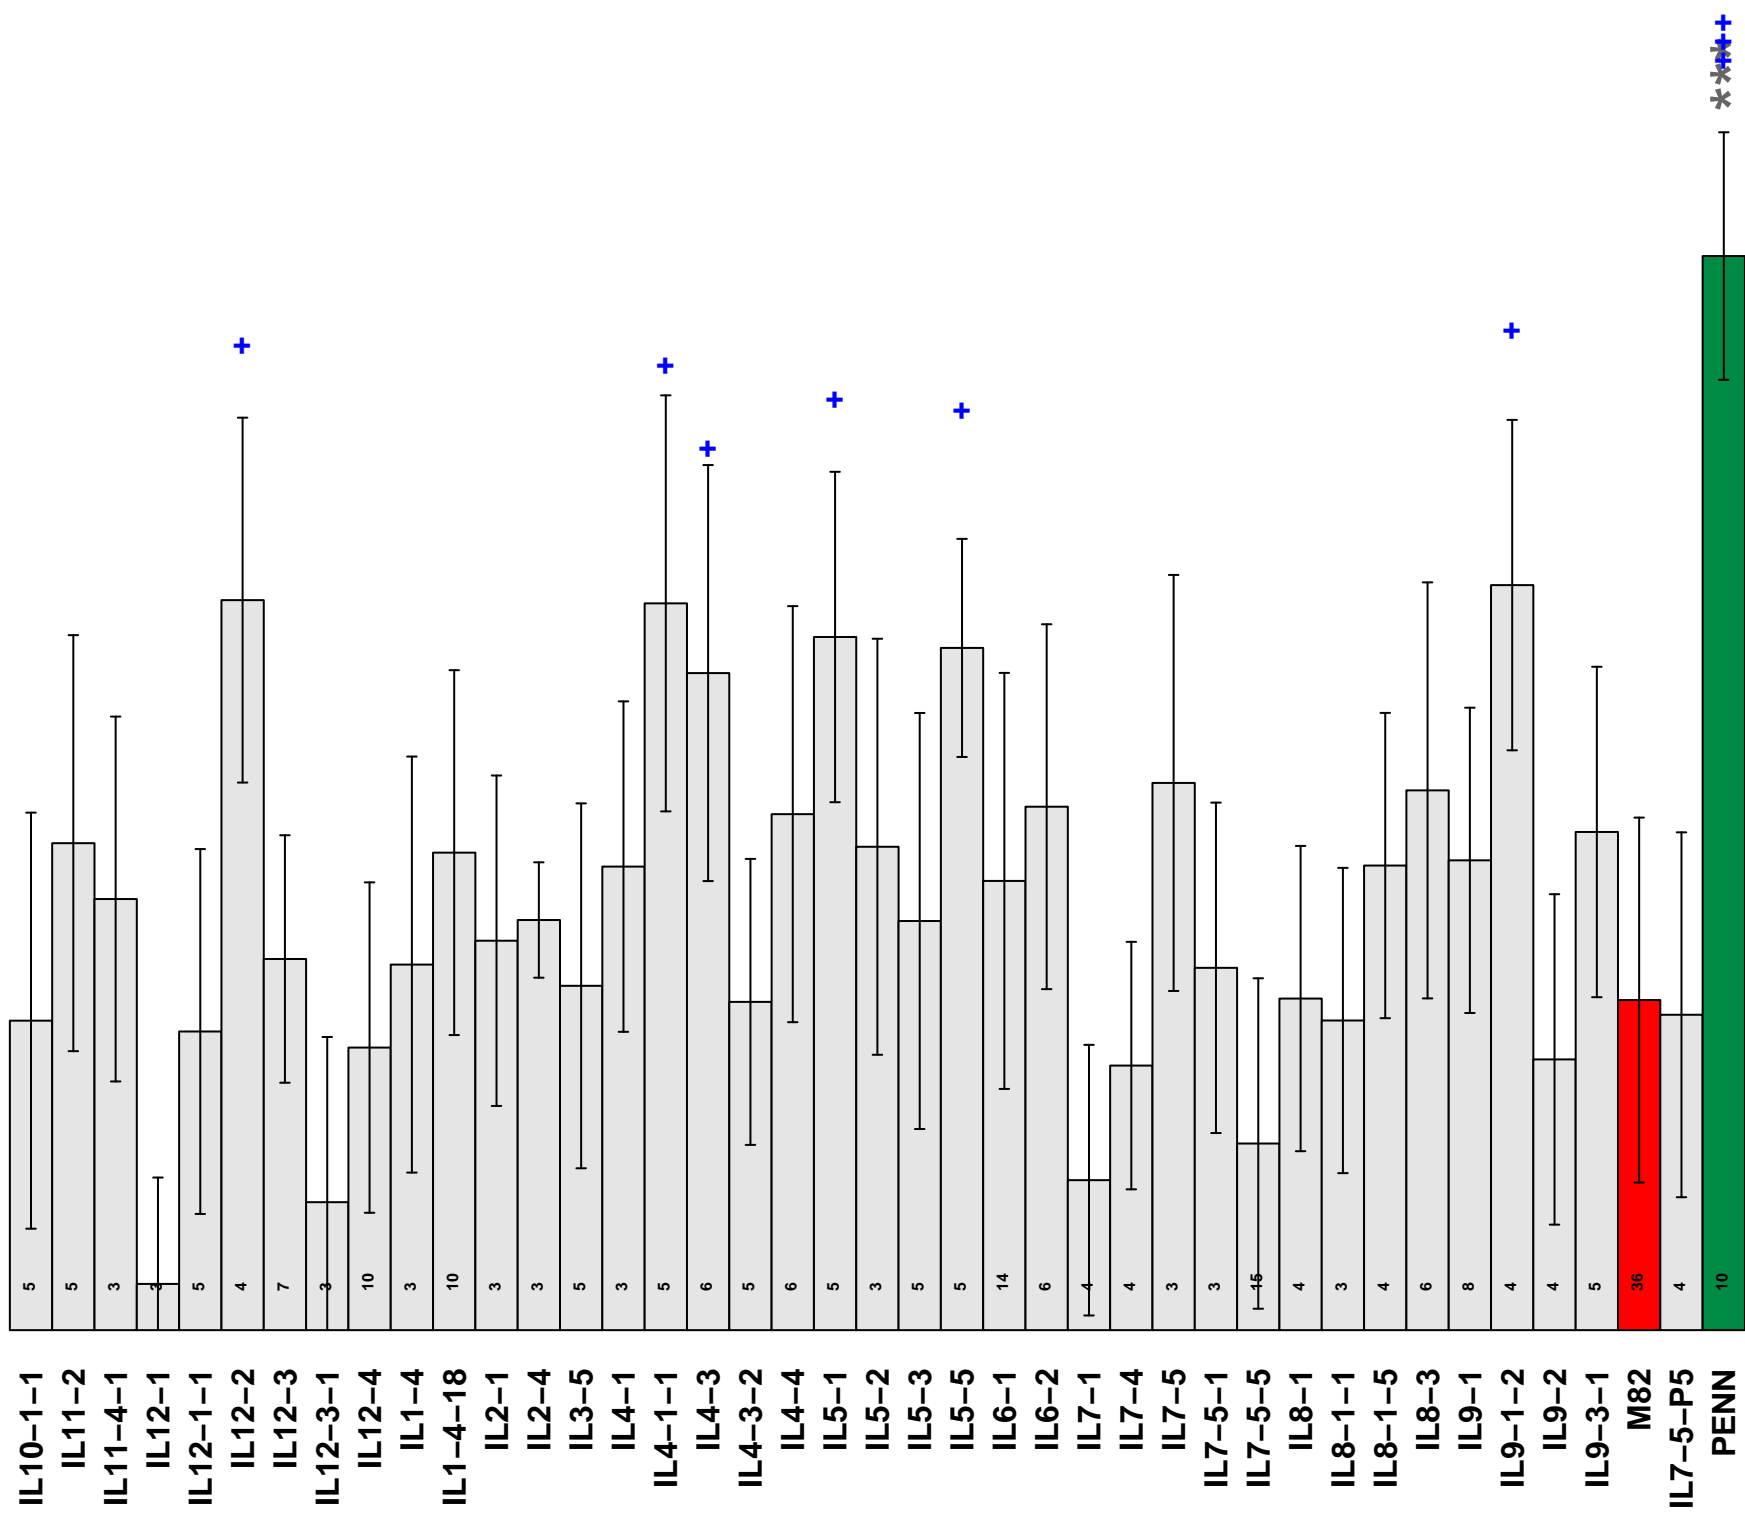

# Angle Thru T2

degrees

40  
30  
20  
10  
0

+\* p < 0.05  
+\*+\* p < 0.01  
+\*+\*+\* p < 0.001

Data filtering: >= 3 roots/IL

Bars = std. err. (sigma) from lm/glht

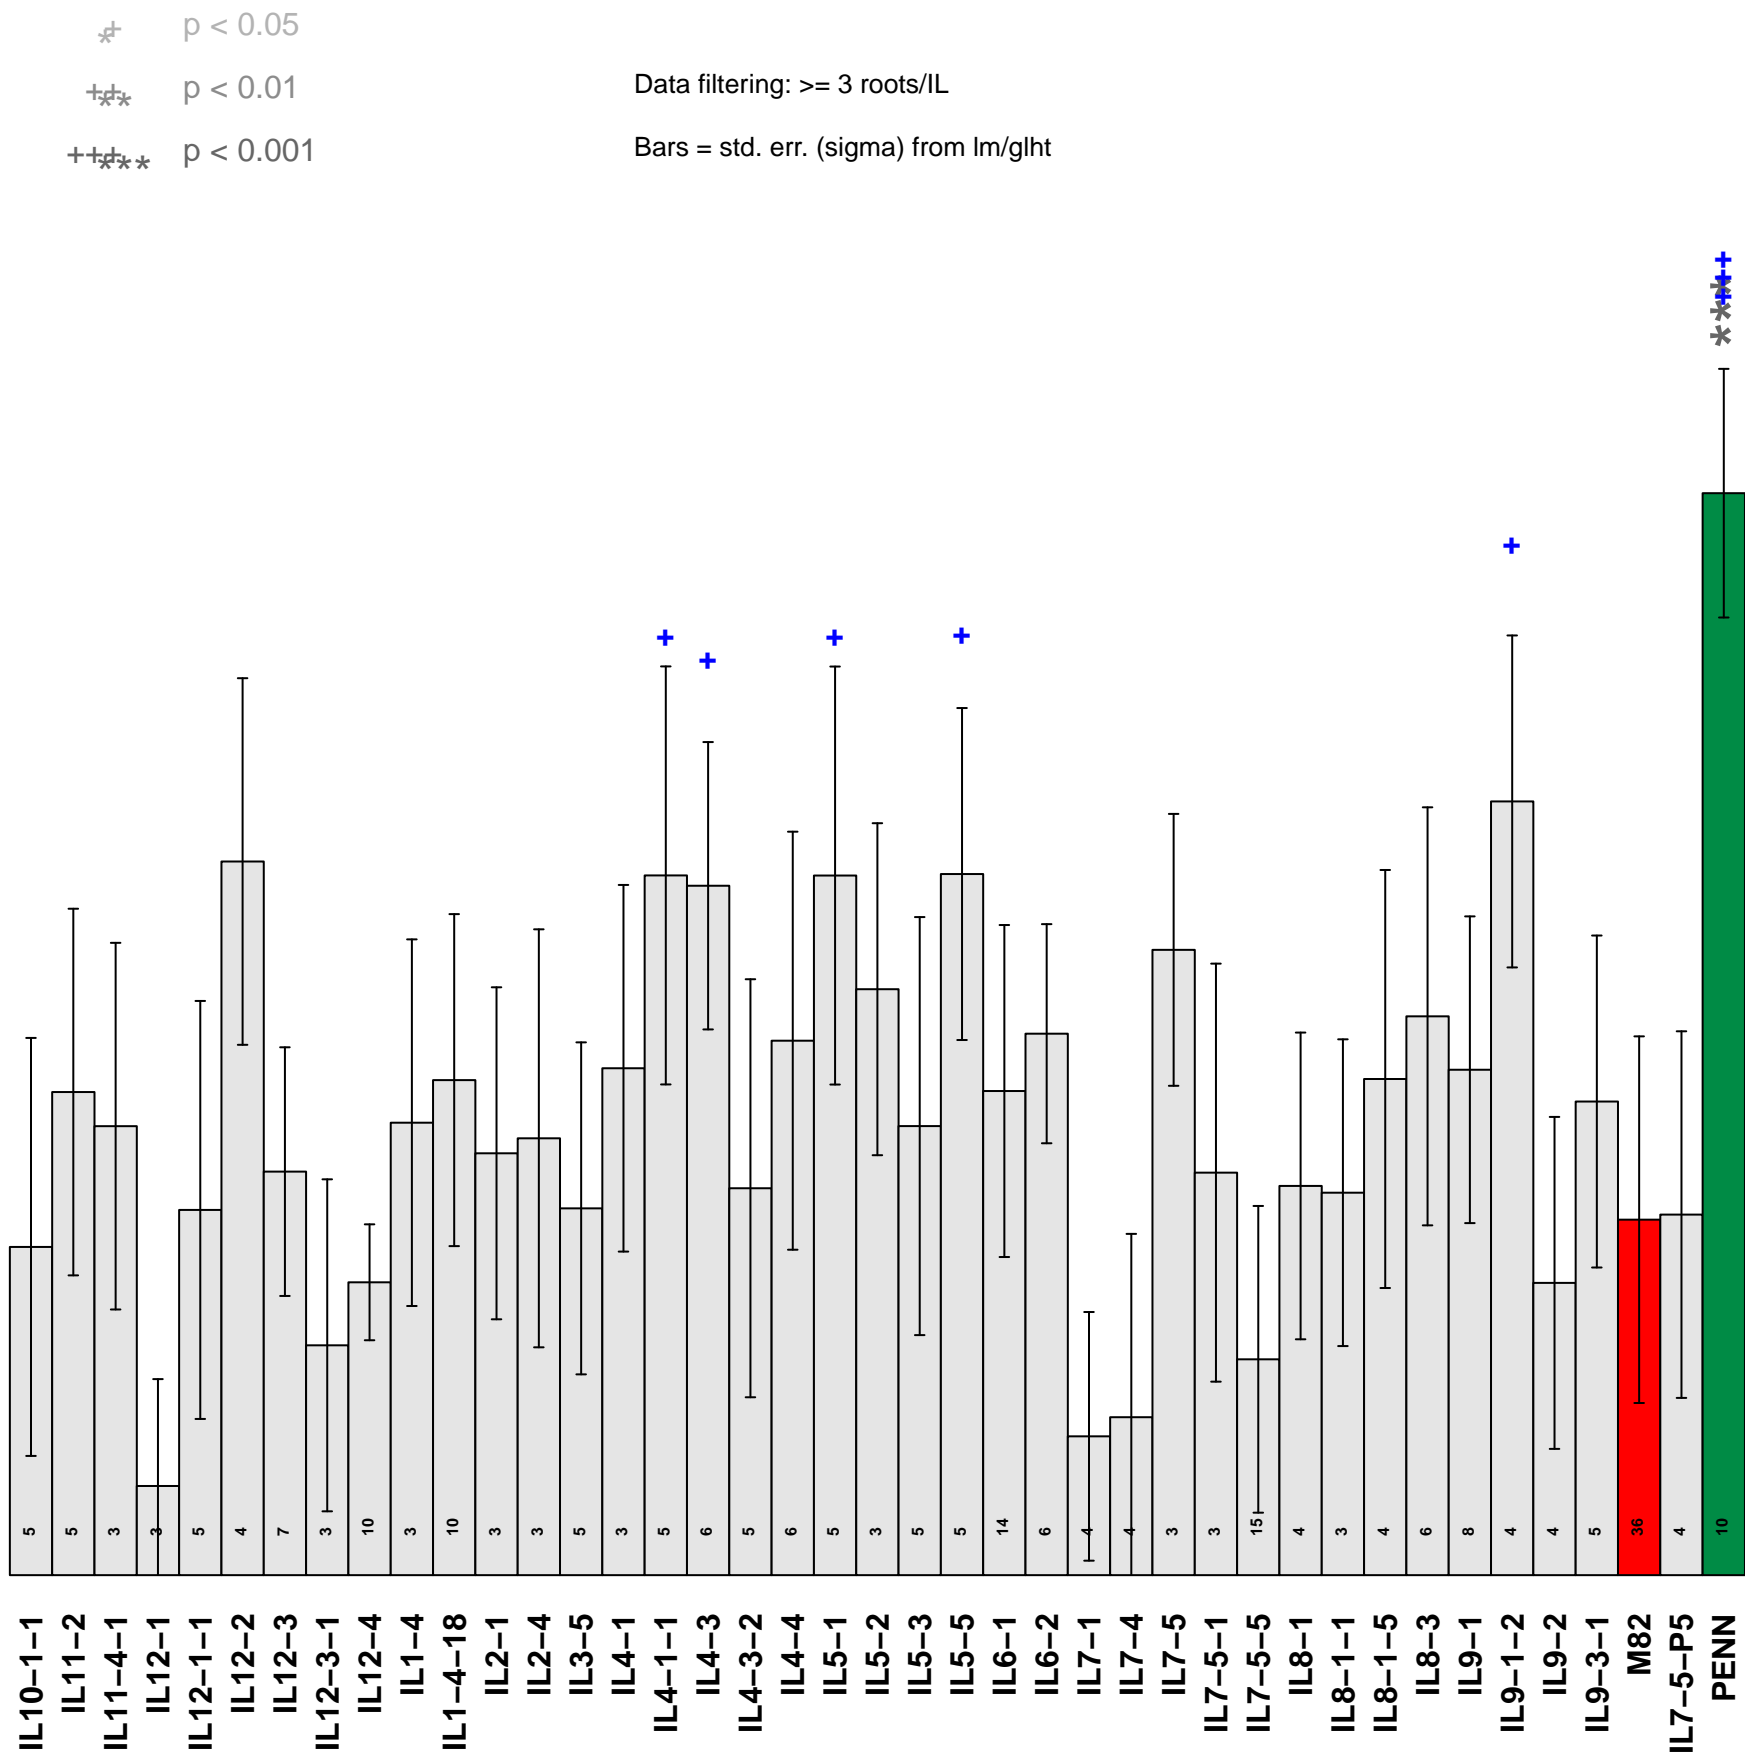

# Angle Thru T3

degrees

40  
30  
20  
10  
0

+\* p < 0.05  
+\*+\* p < 0.01  
+\*+\*+\* p < 0.001

Data filtering: >= 3 roots/IL

Bars = std. err. (sigma) from lm/glht

IL10-1-1  
IL11-2  
IL11-4-1  
IL12-1  
IL12-1-1  
IL12-2  
IL12-3  
IL12-3-1  
IL12-4  
IL1-4  
IL1-4-18  
IL2-1  
IL2-4  
IL3-5  
IL4-1  
IL4-1-1  
IL4-3  
IL4-3-2  
IL4-4  
IL5-1  
IL5-2  
IL5-3  
IL5-5  
IL6-1  
IL6-2  
IL7-1  
IL7-4  
IL7-5  
IL7-5-1  
IL7-5-5  
IL8-1  
IL8-1-1  
IL8-1-5  
IL8-3  
IL9-1  
IL9-1-2  
IL9-2  
IL9-3-1  
M82  
IL7-5-P5  
PENN

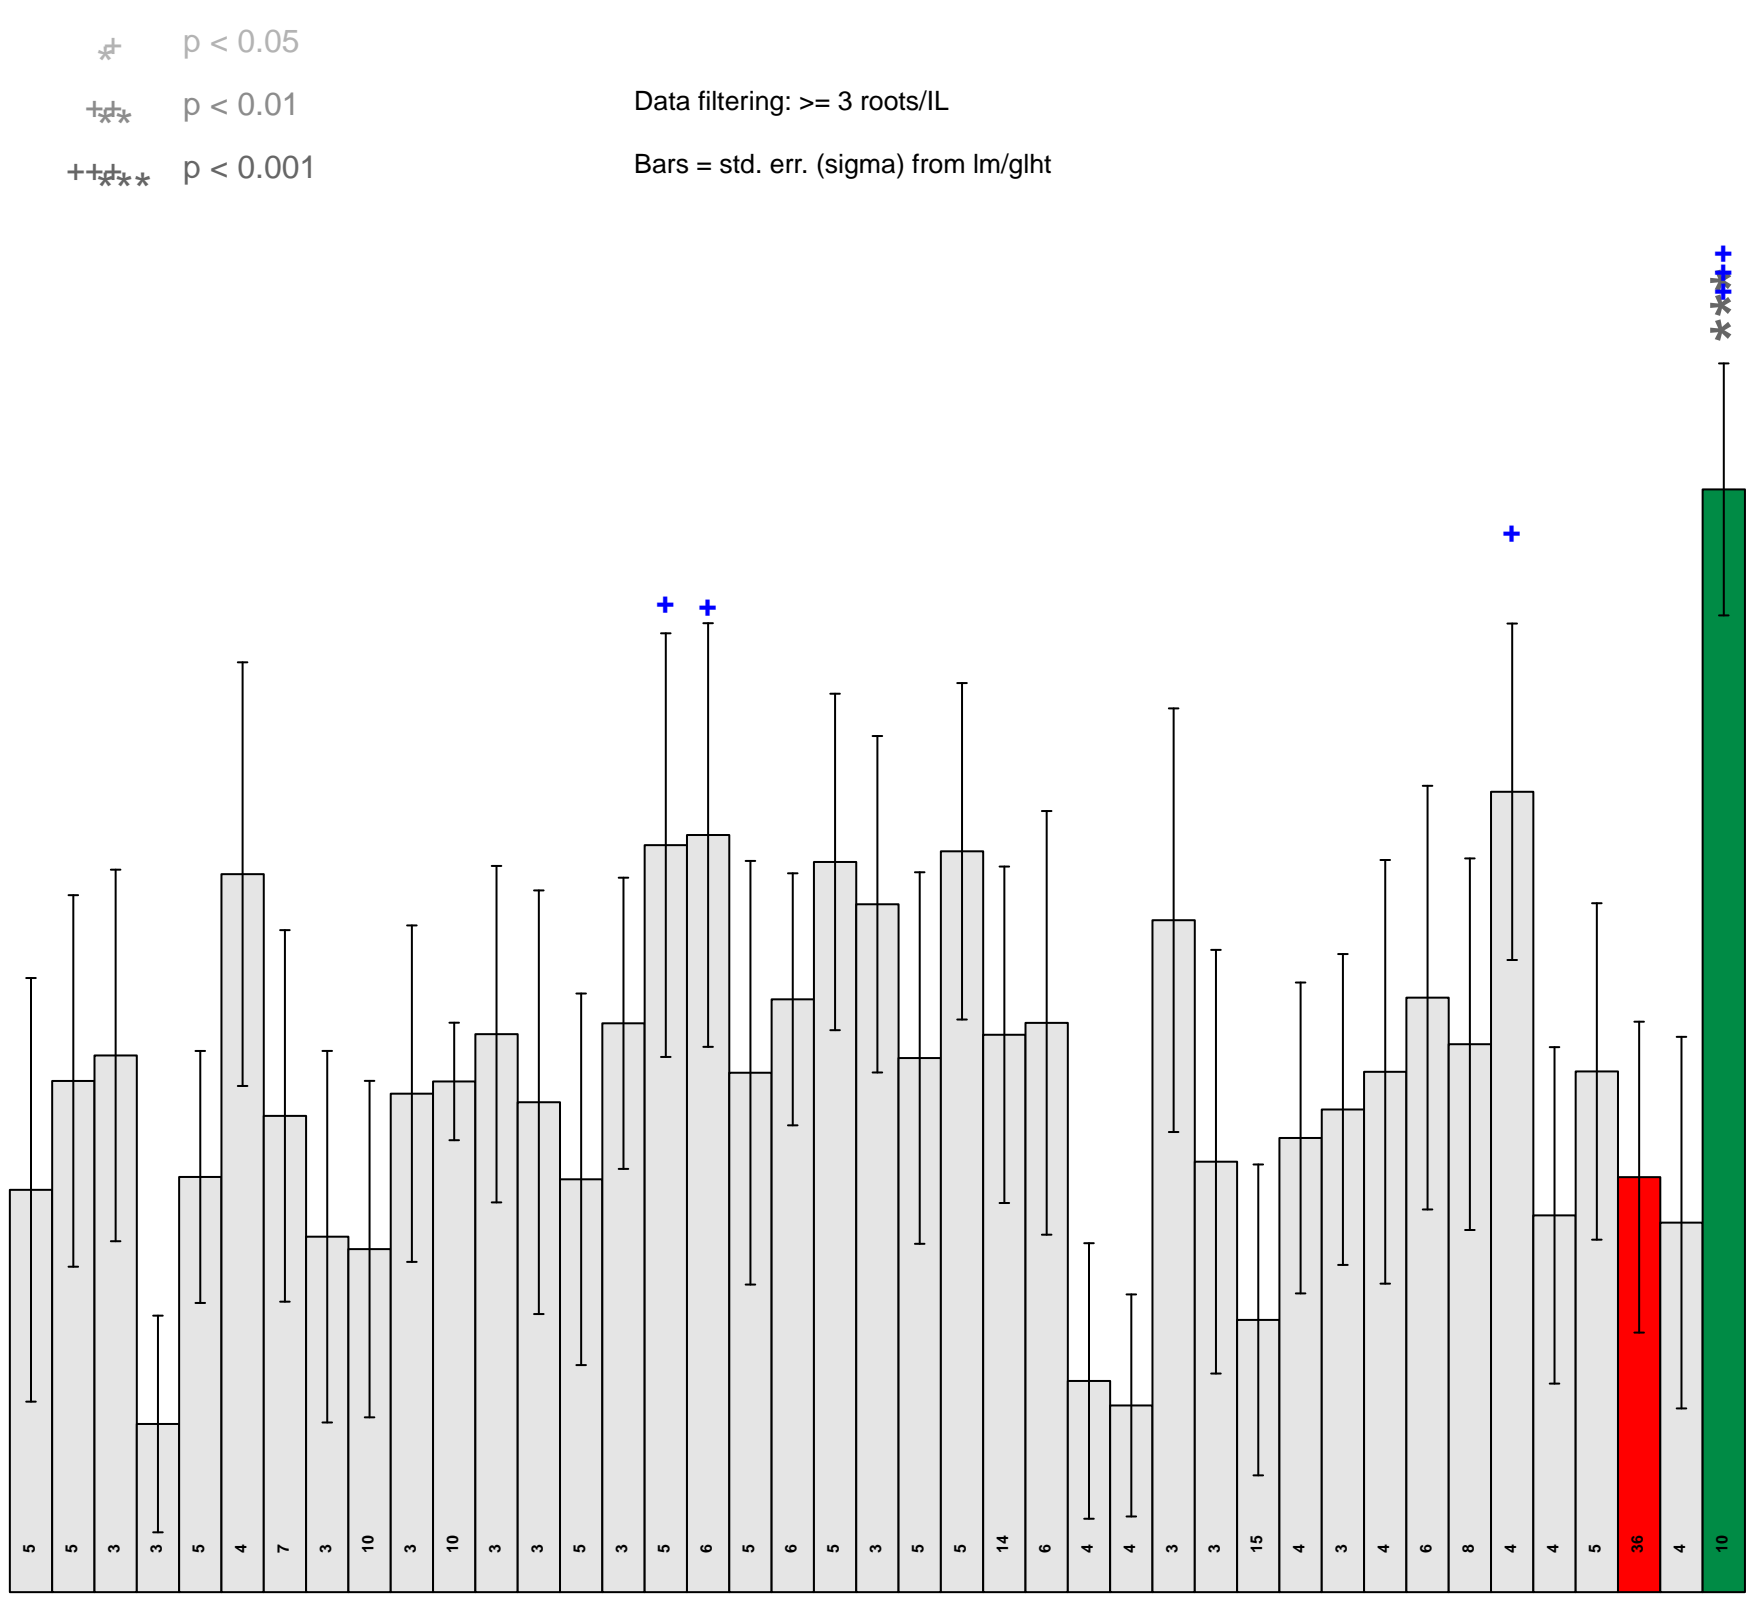

# Angle Thru T4

degrees

40  
30  
20  
10  
0

+\* p < 0.05  
+\*+\* p < 0.01  
+\*+\*+\* p < 0.001

Data filtering: >= 3 roots/IL

Bars = std. err. (sigma) from lm/glht

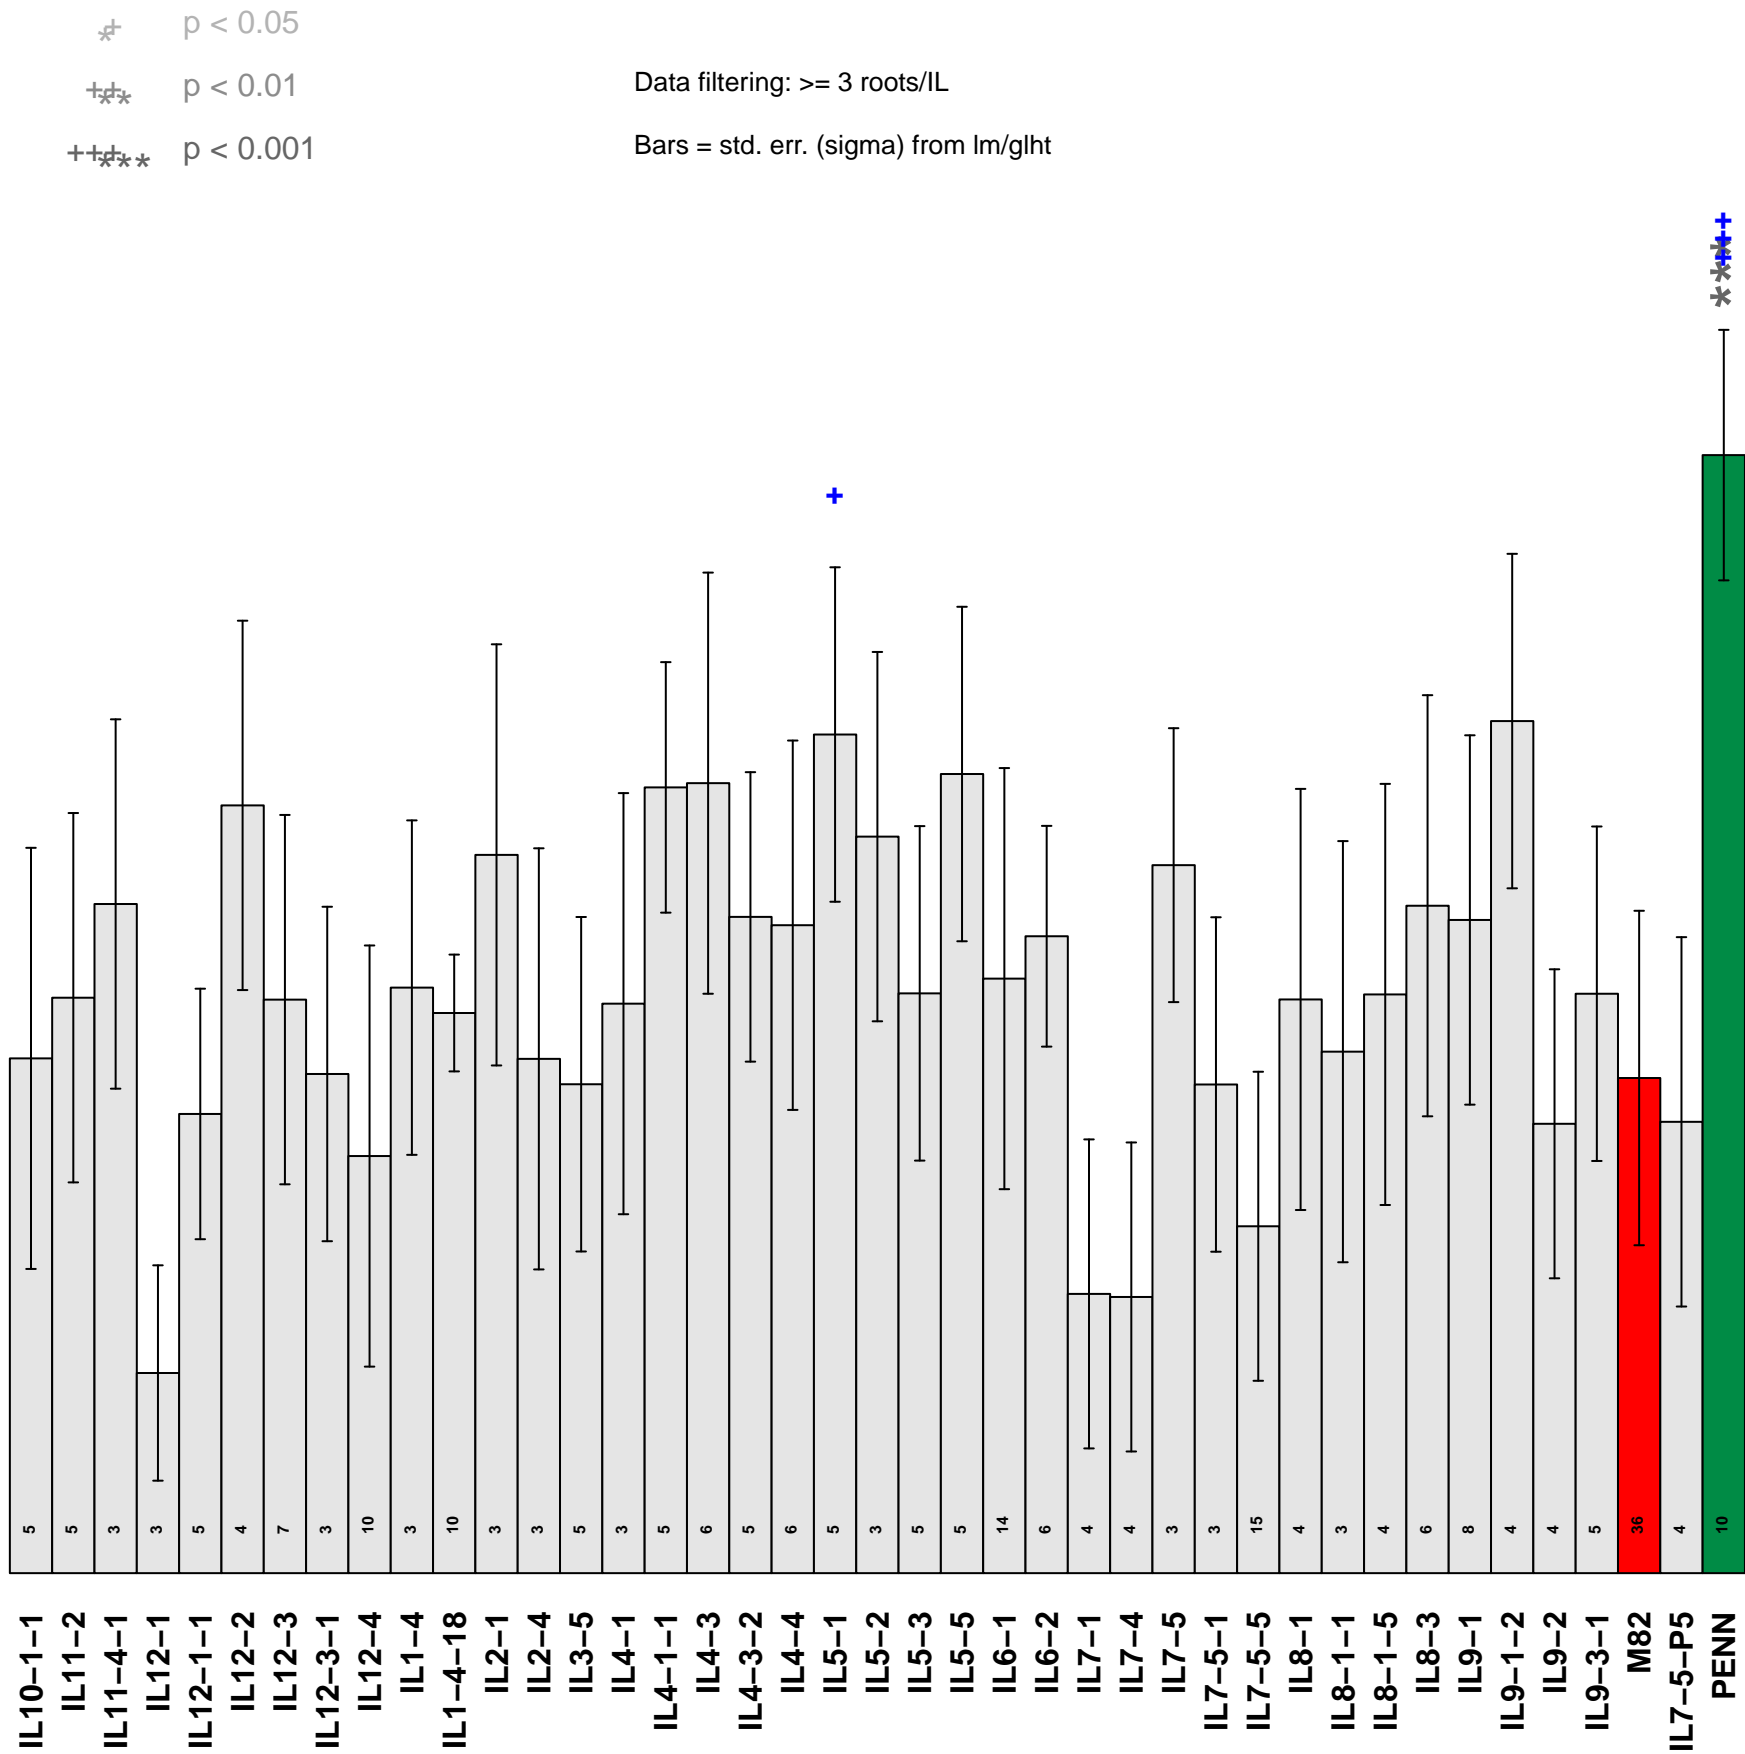

# Angle Thru T5

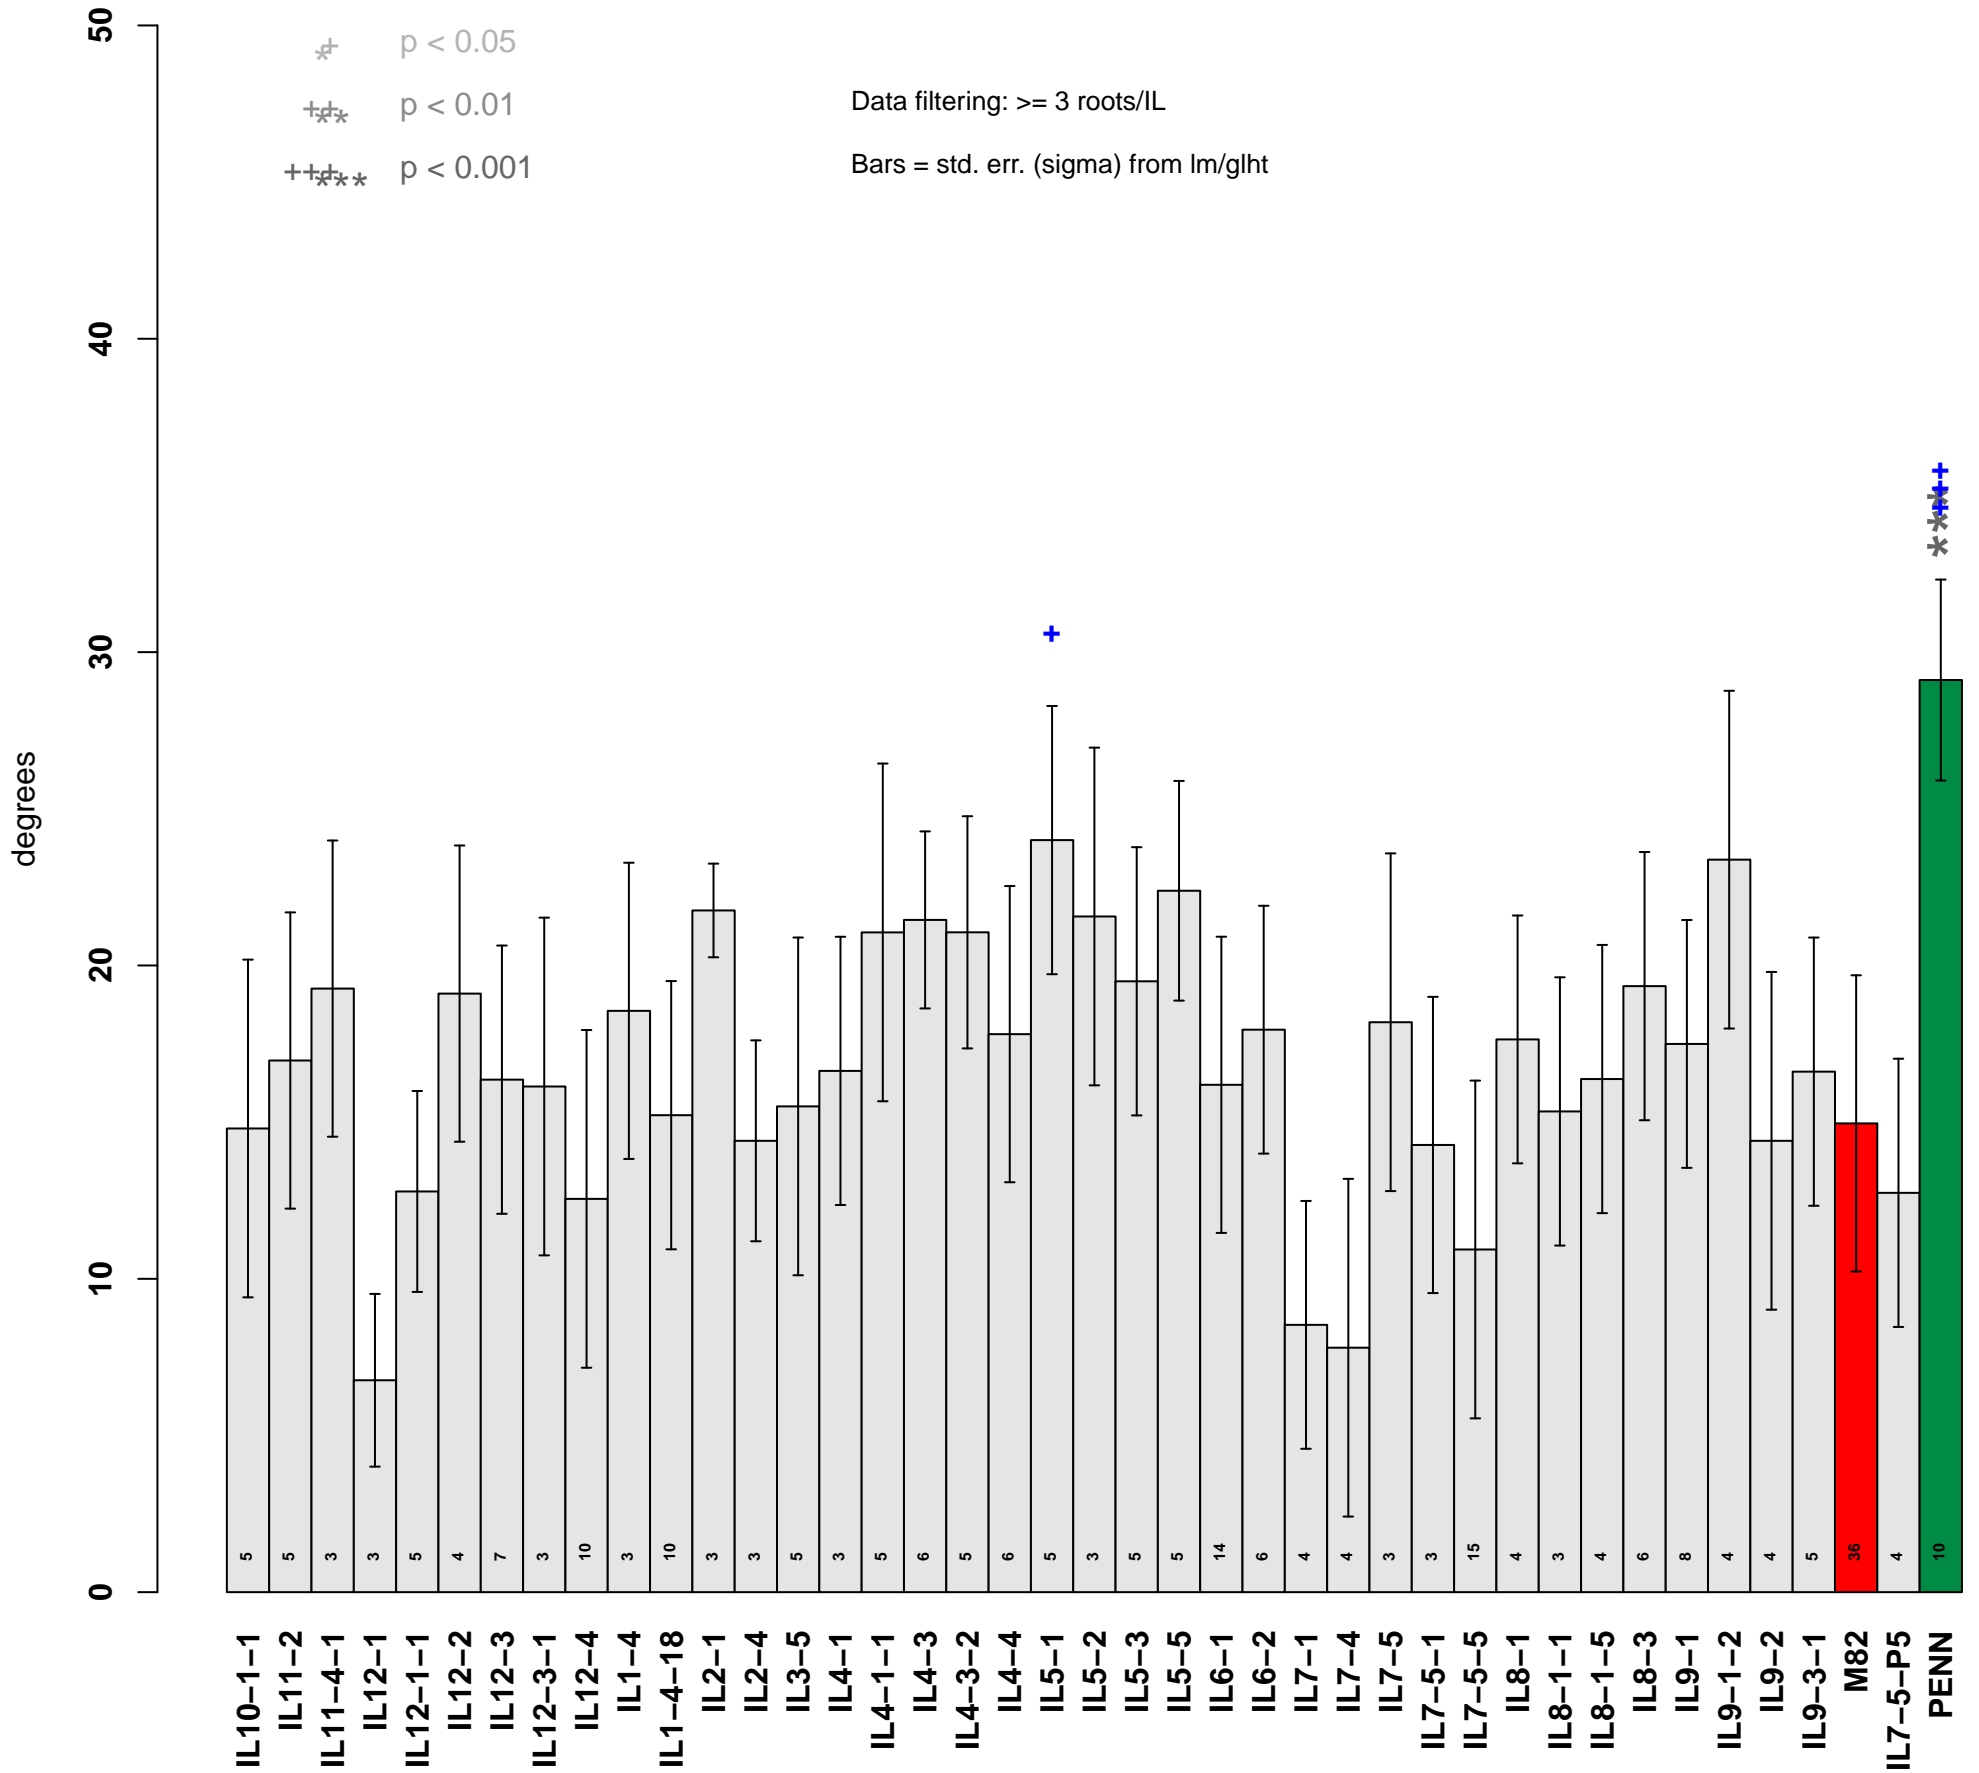

# Angle Thru T6

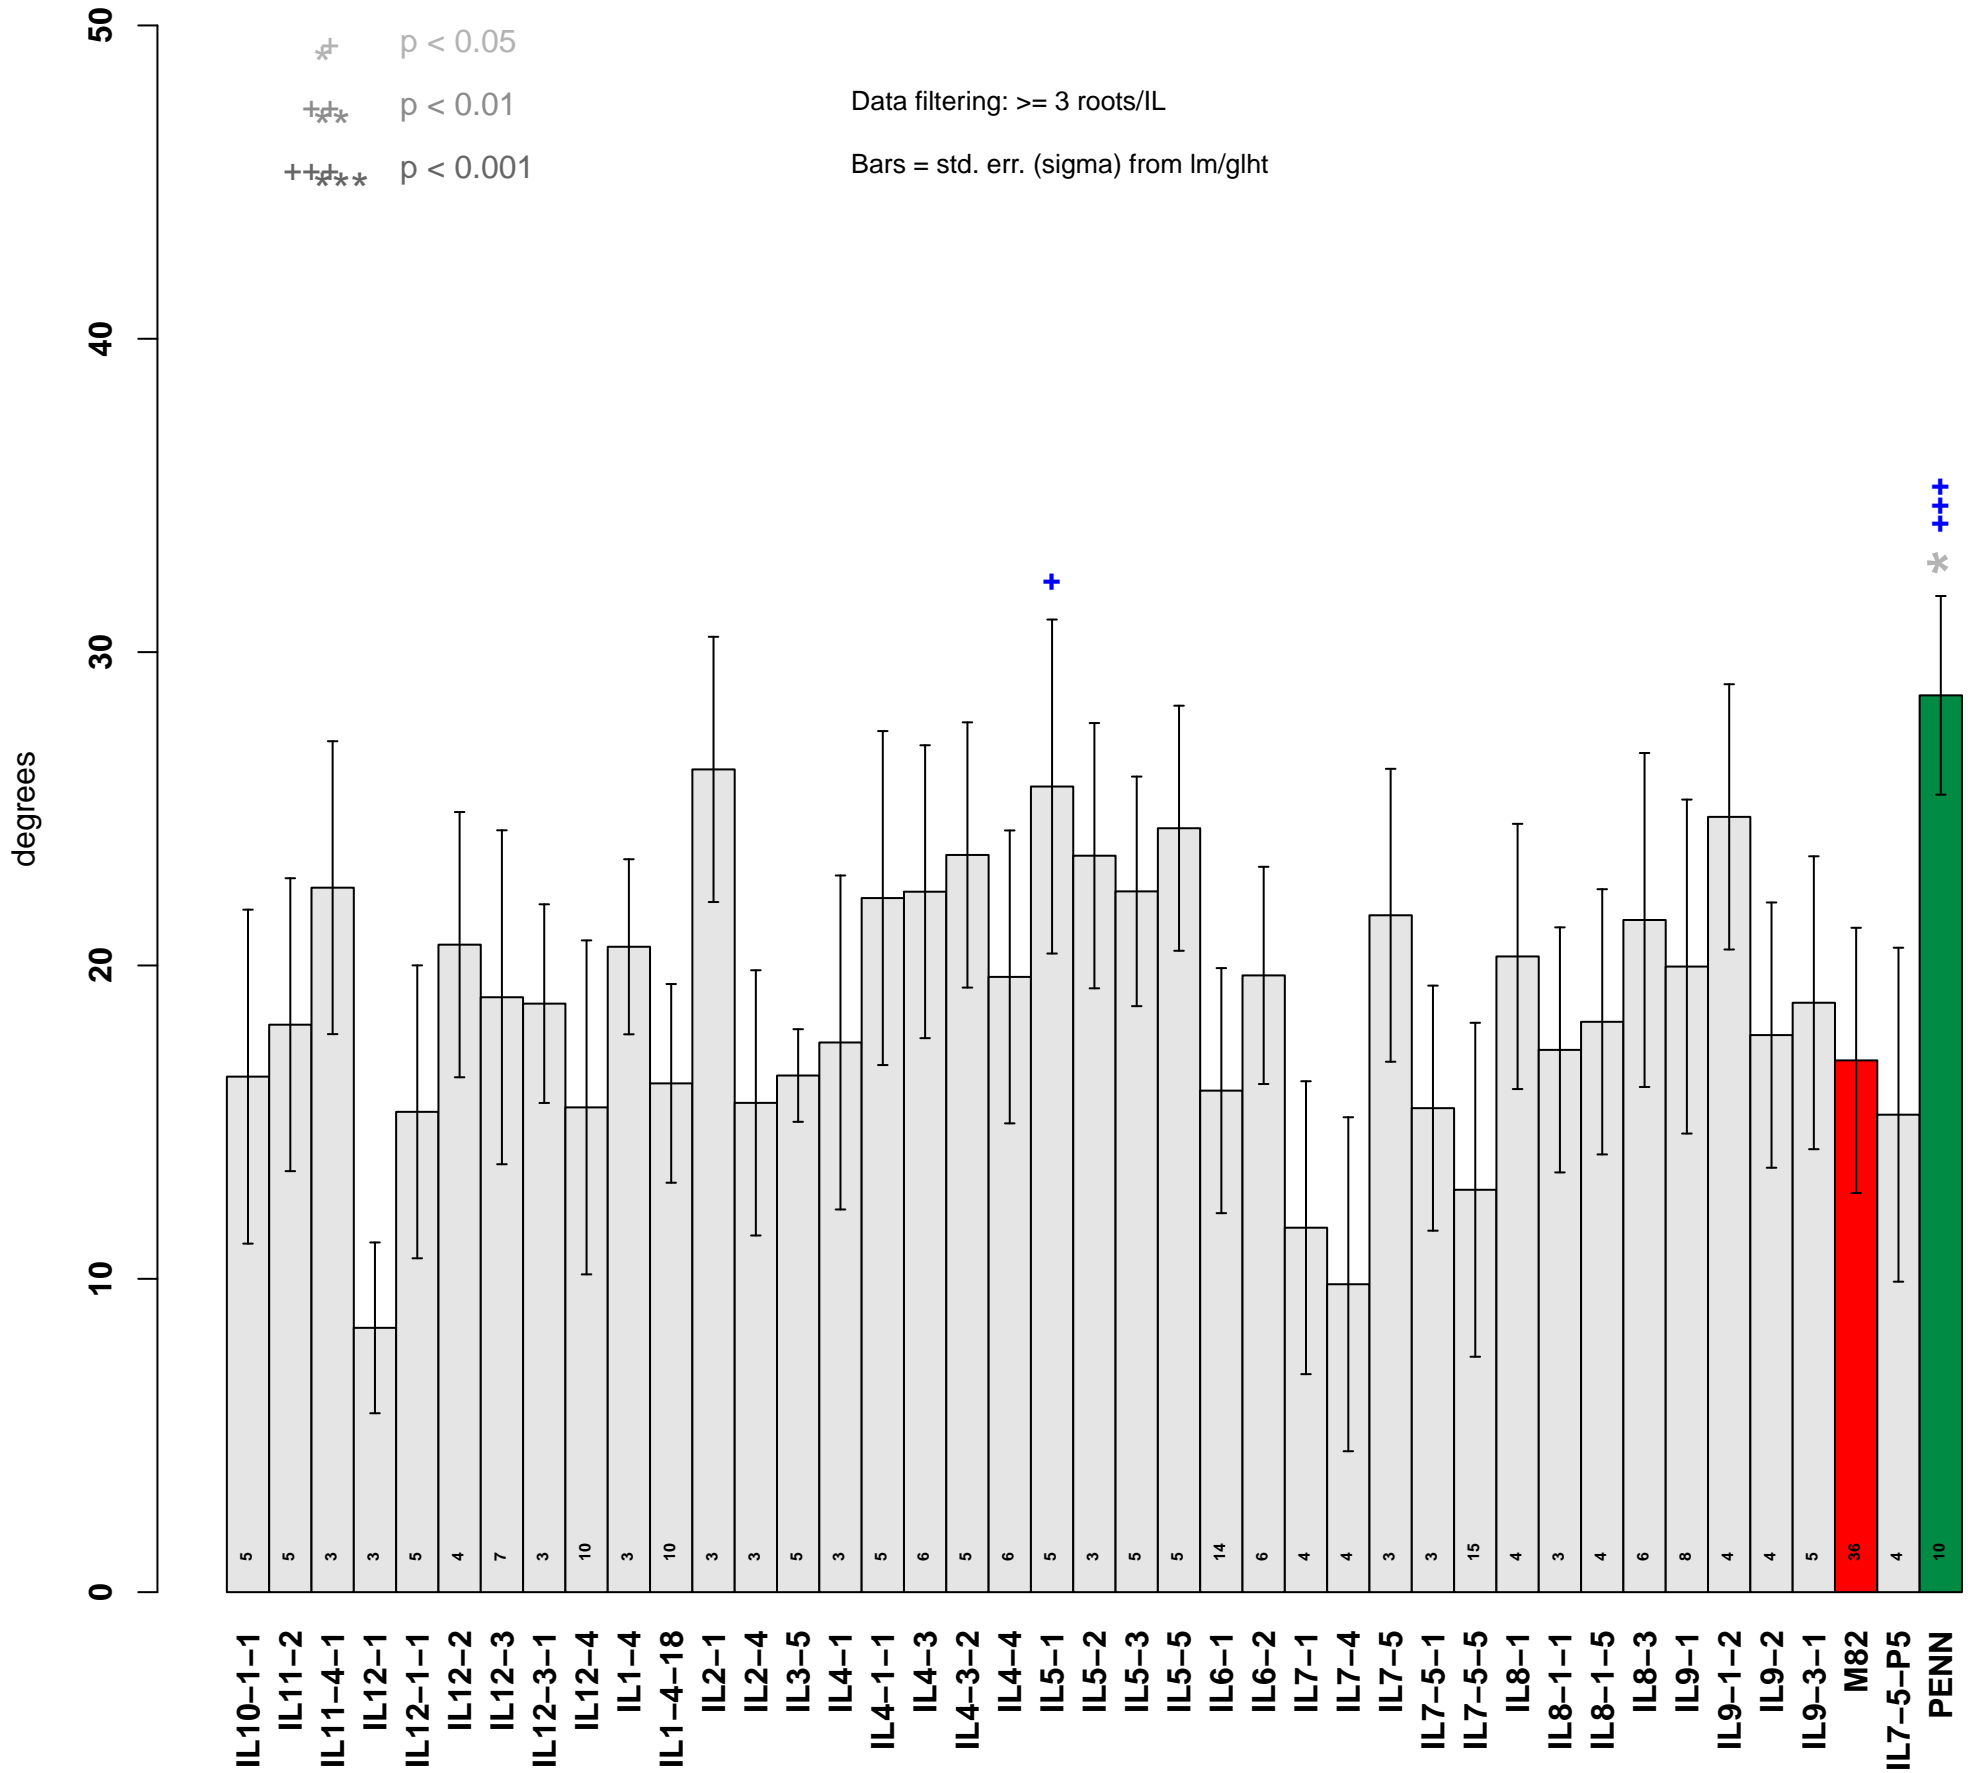

# Angle Thru T7

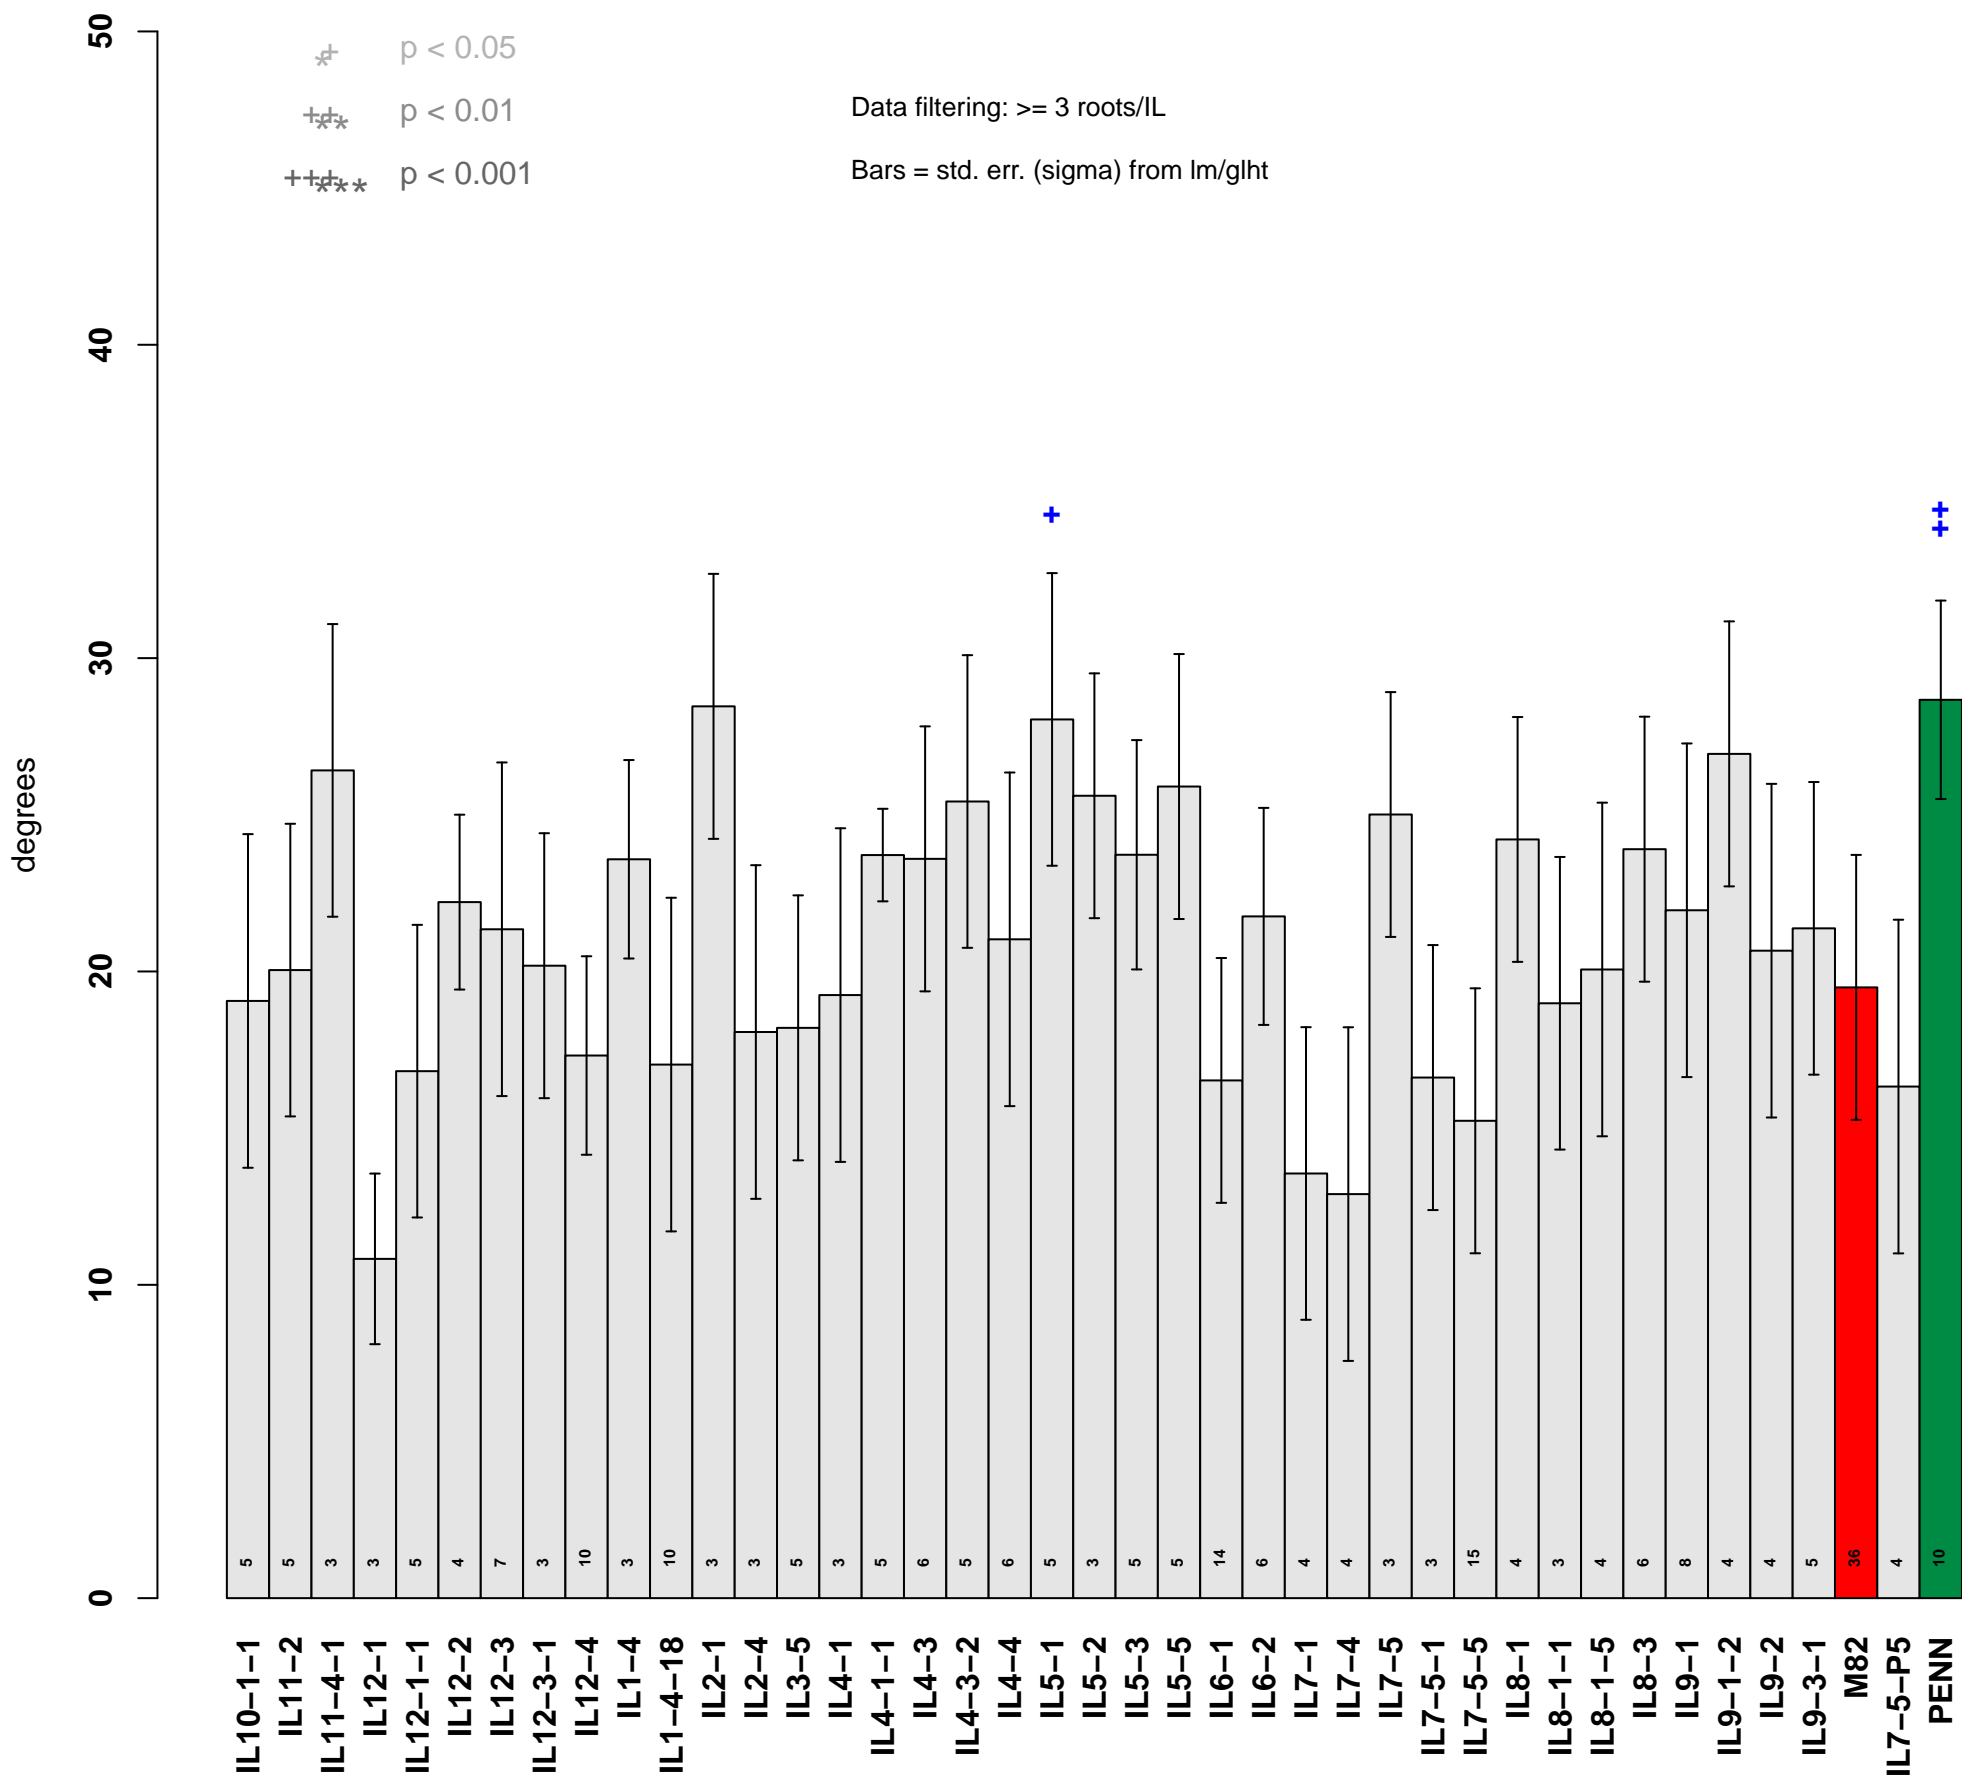



# Angle Thru T8

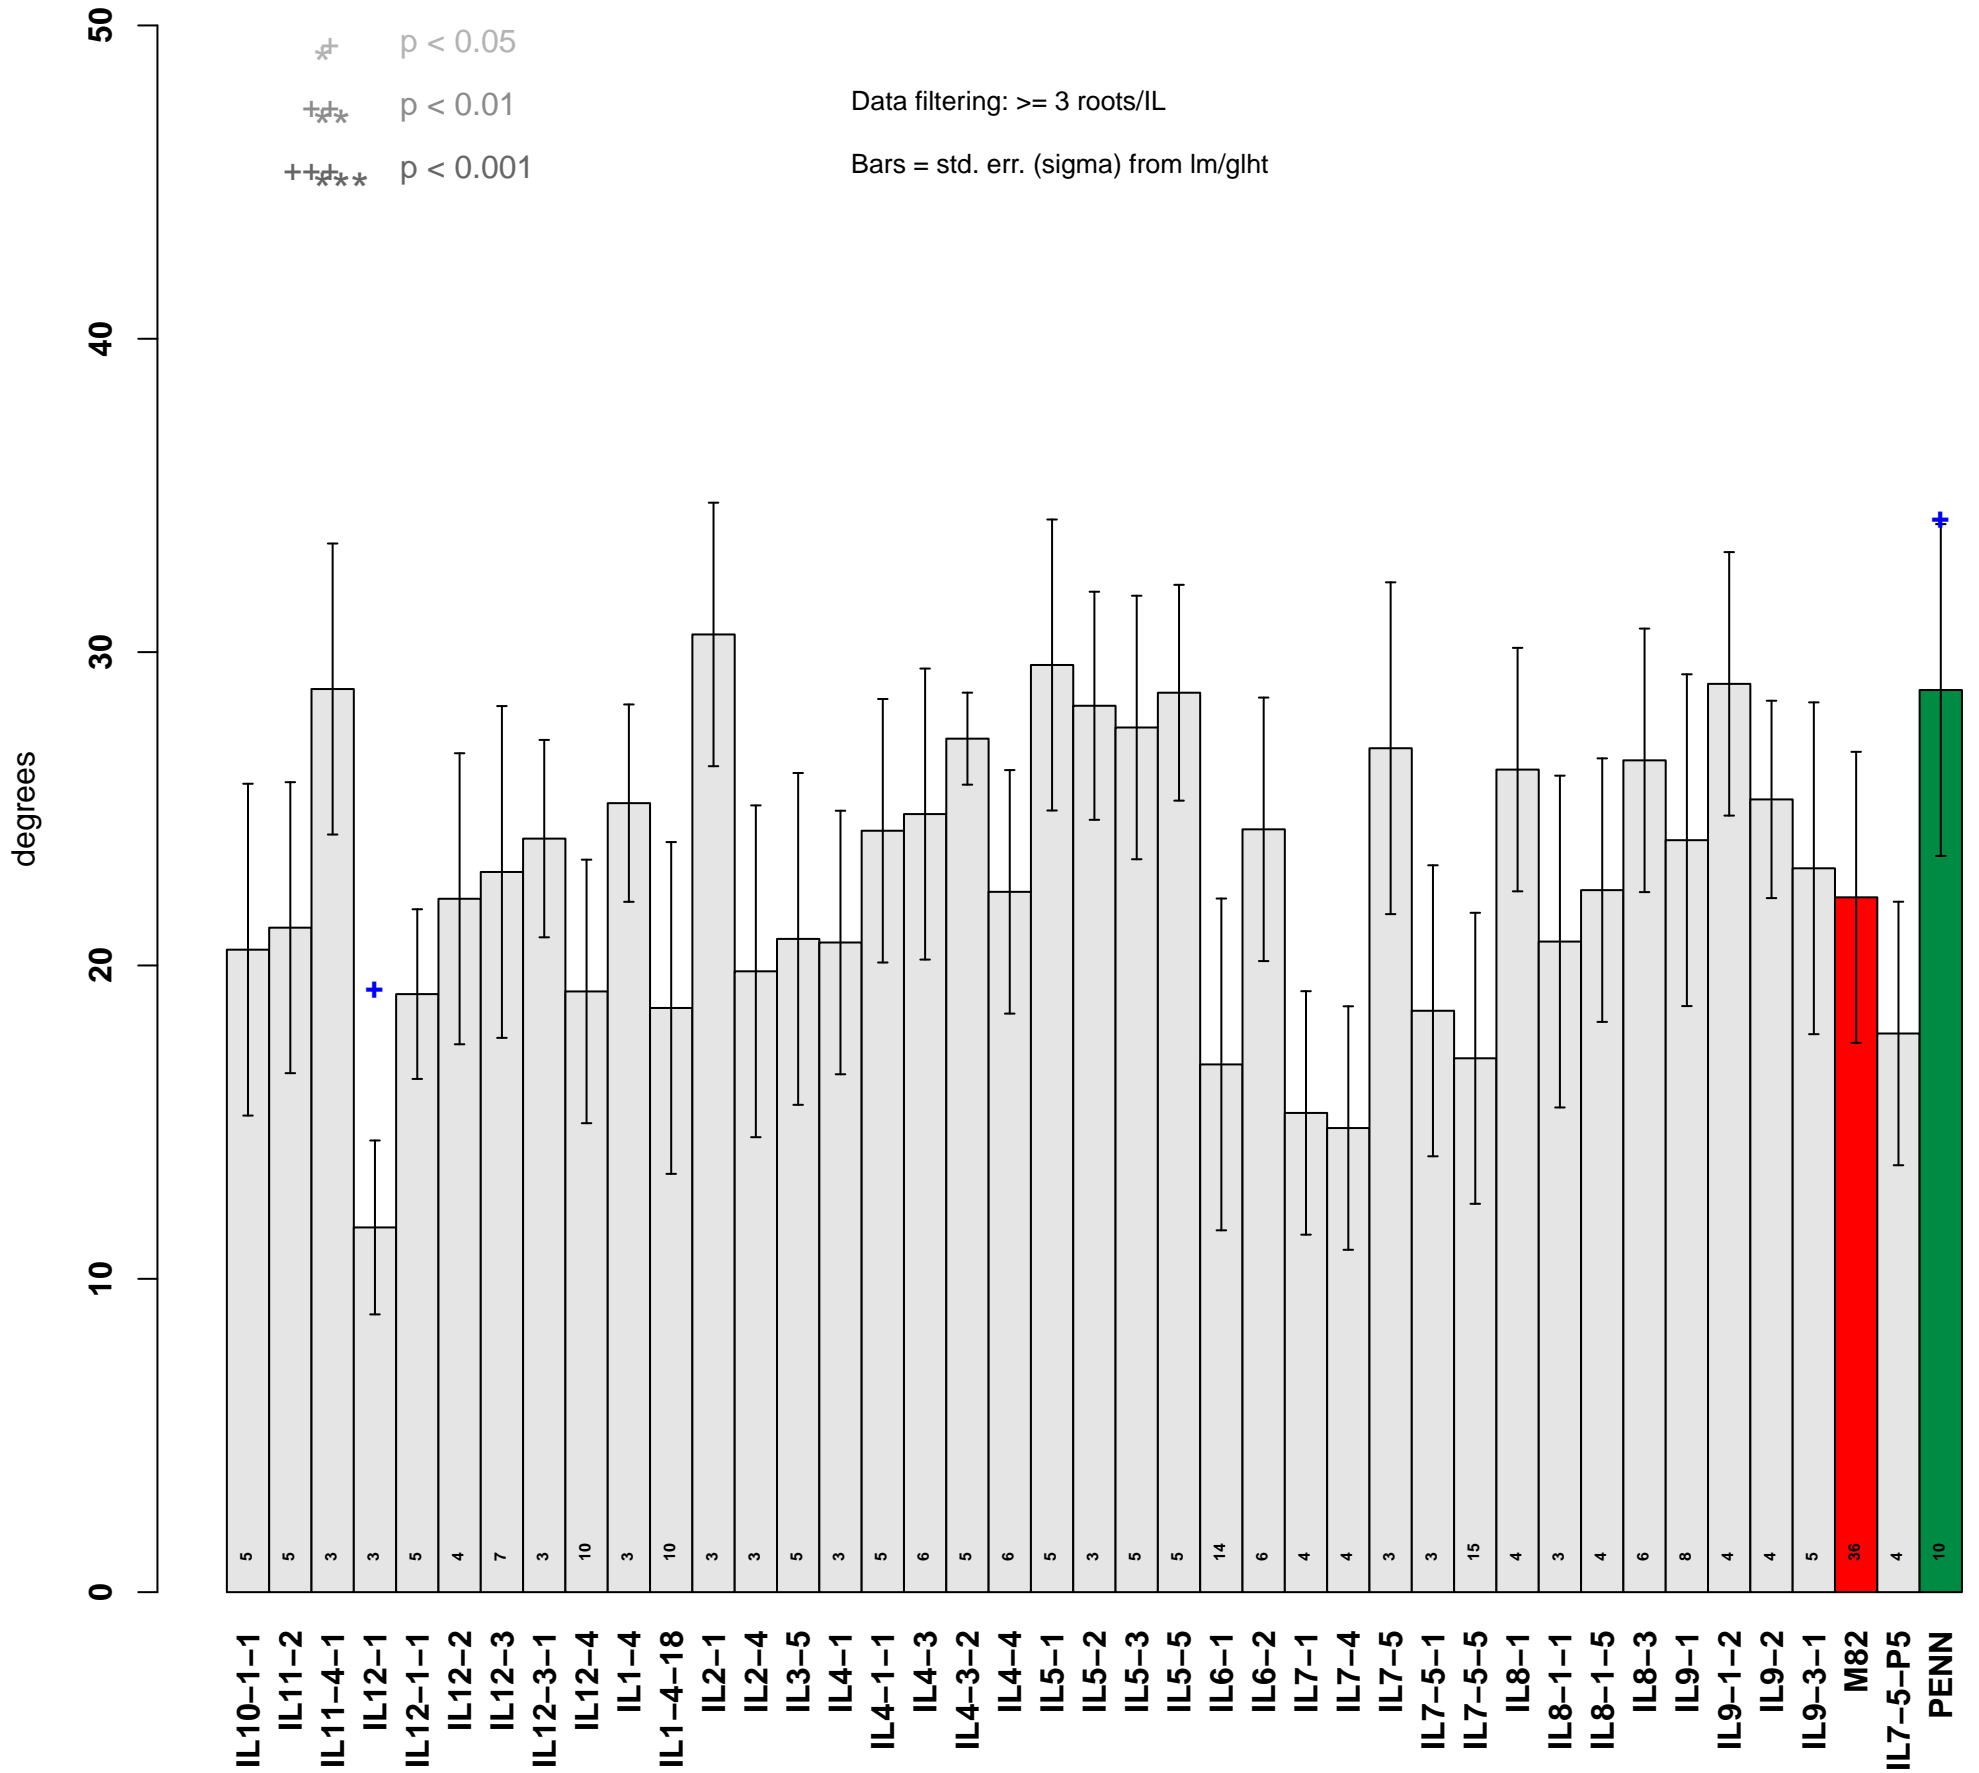

# Angle Thru T9

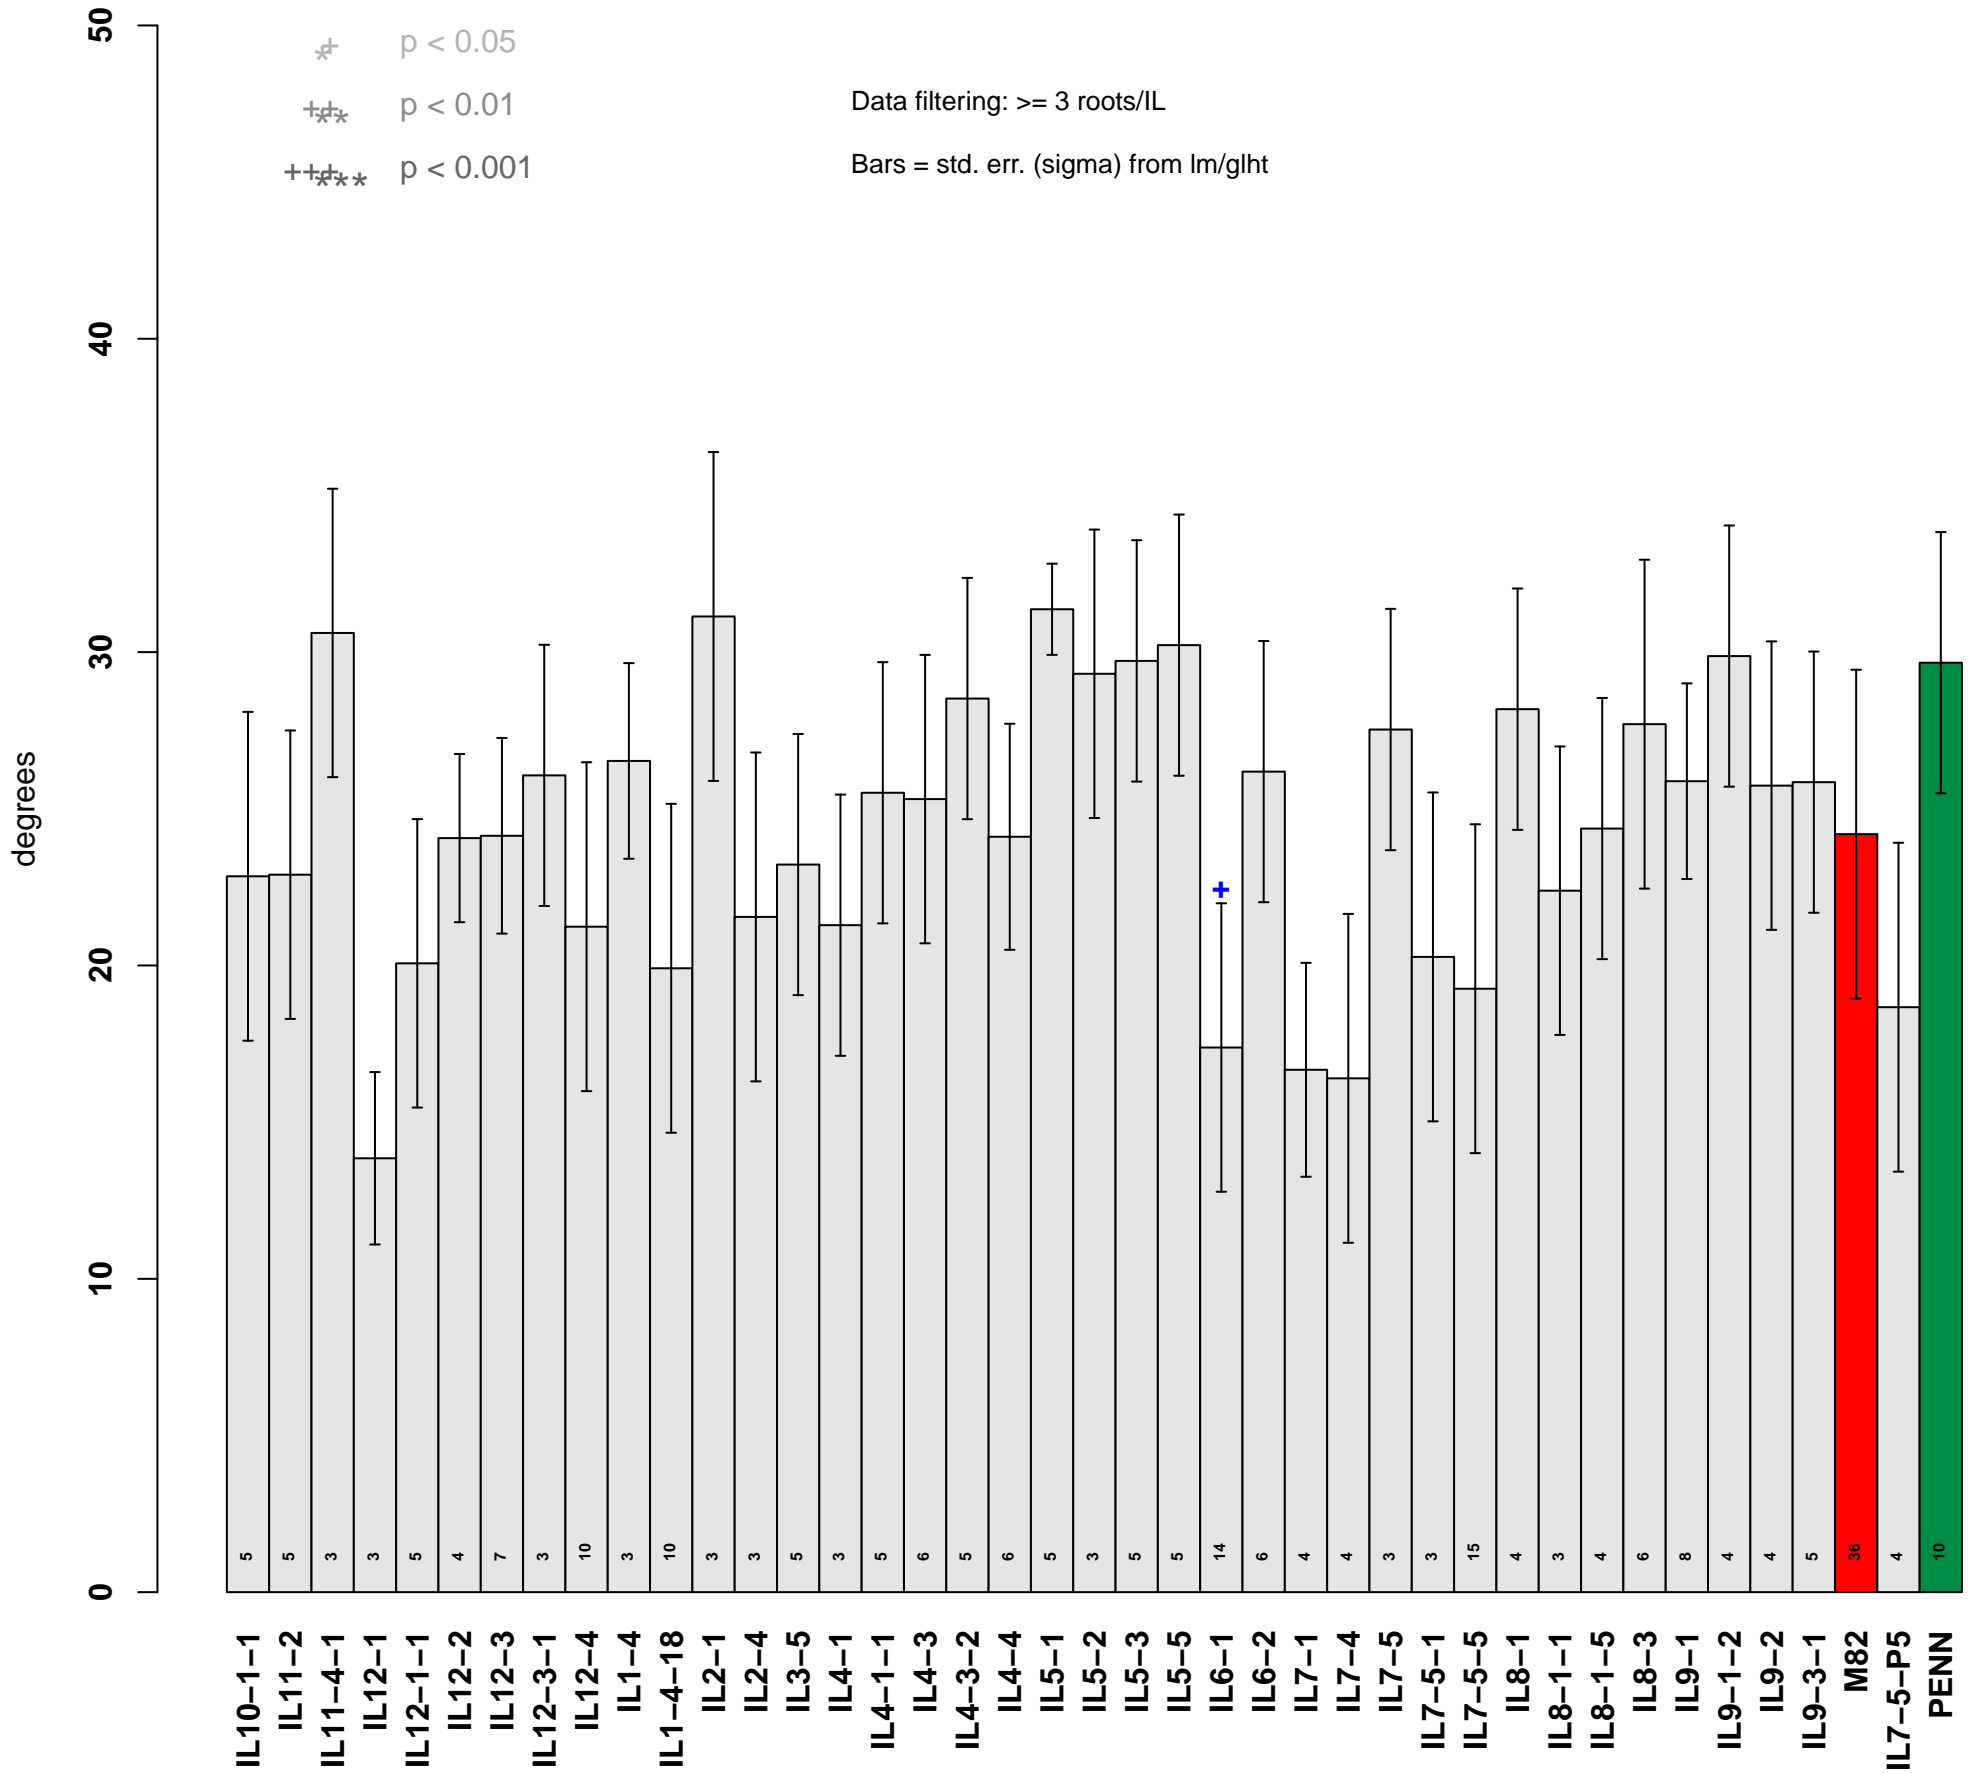

# Angle Thru T10

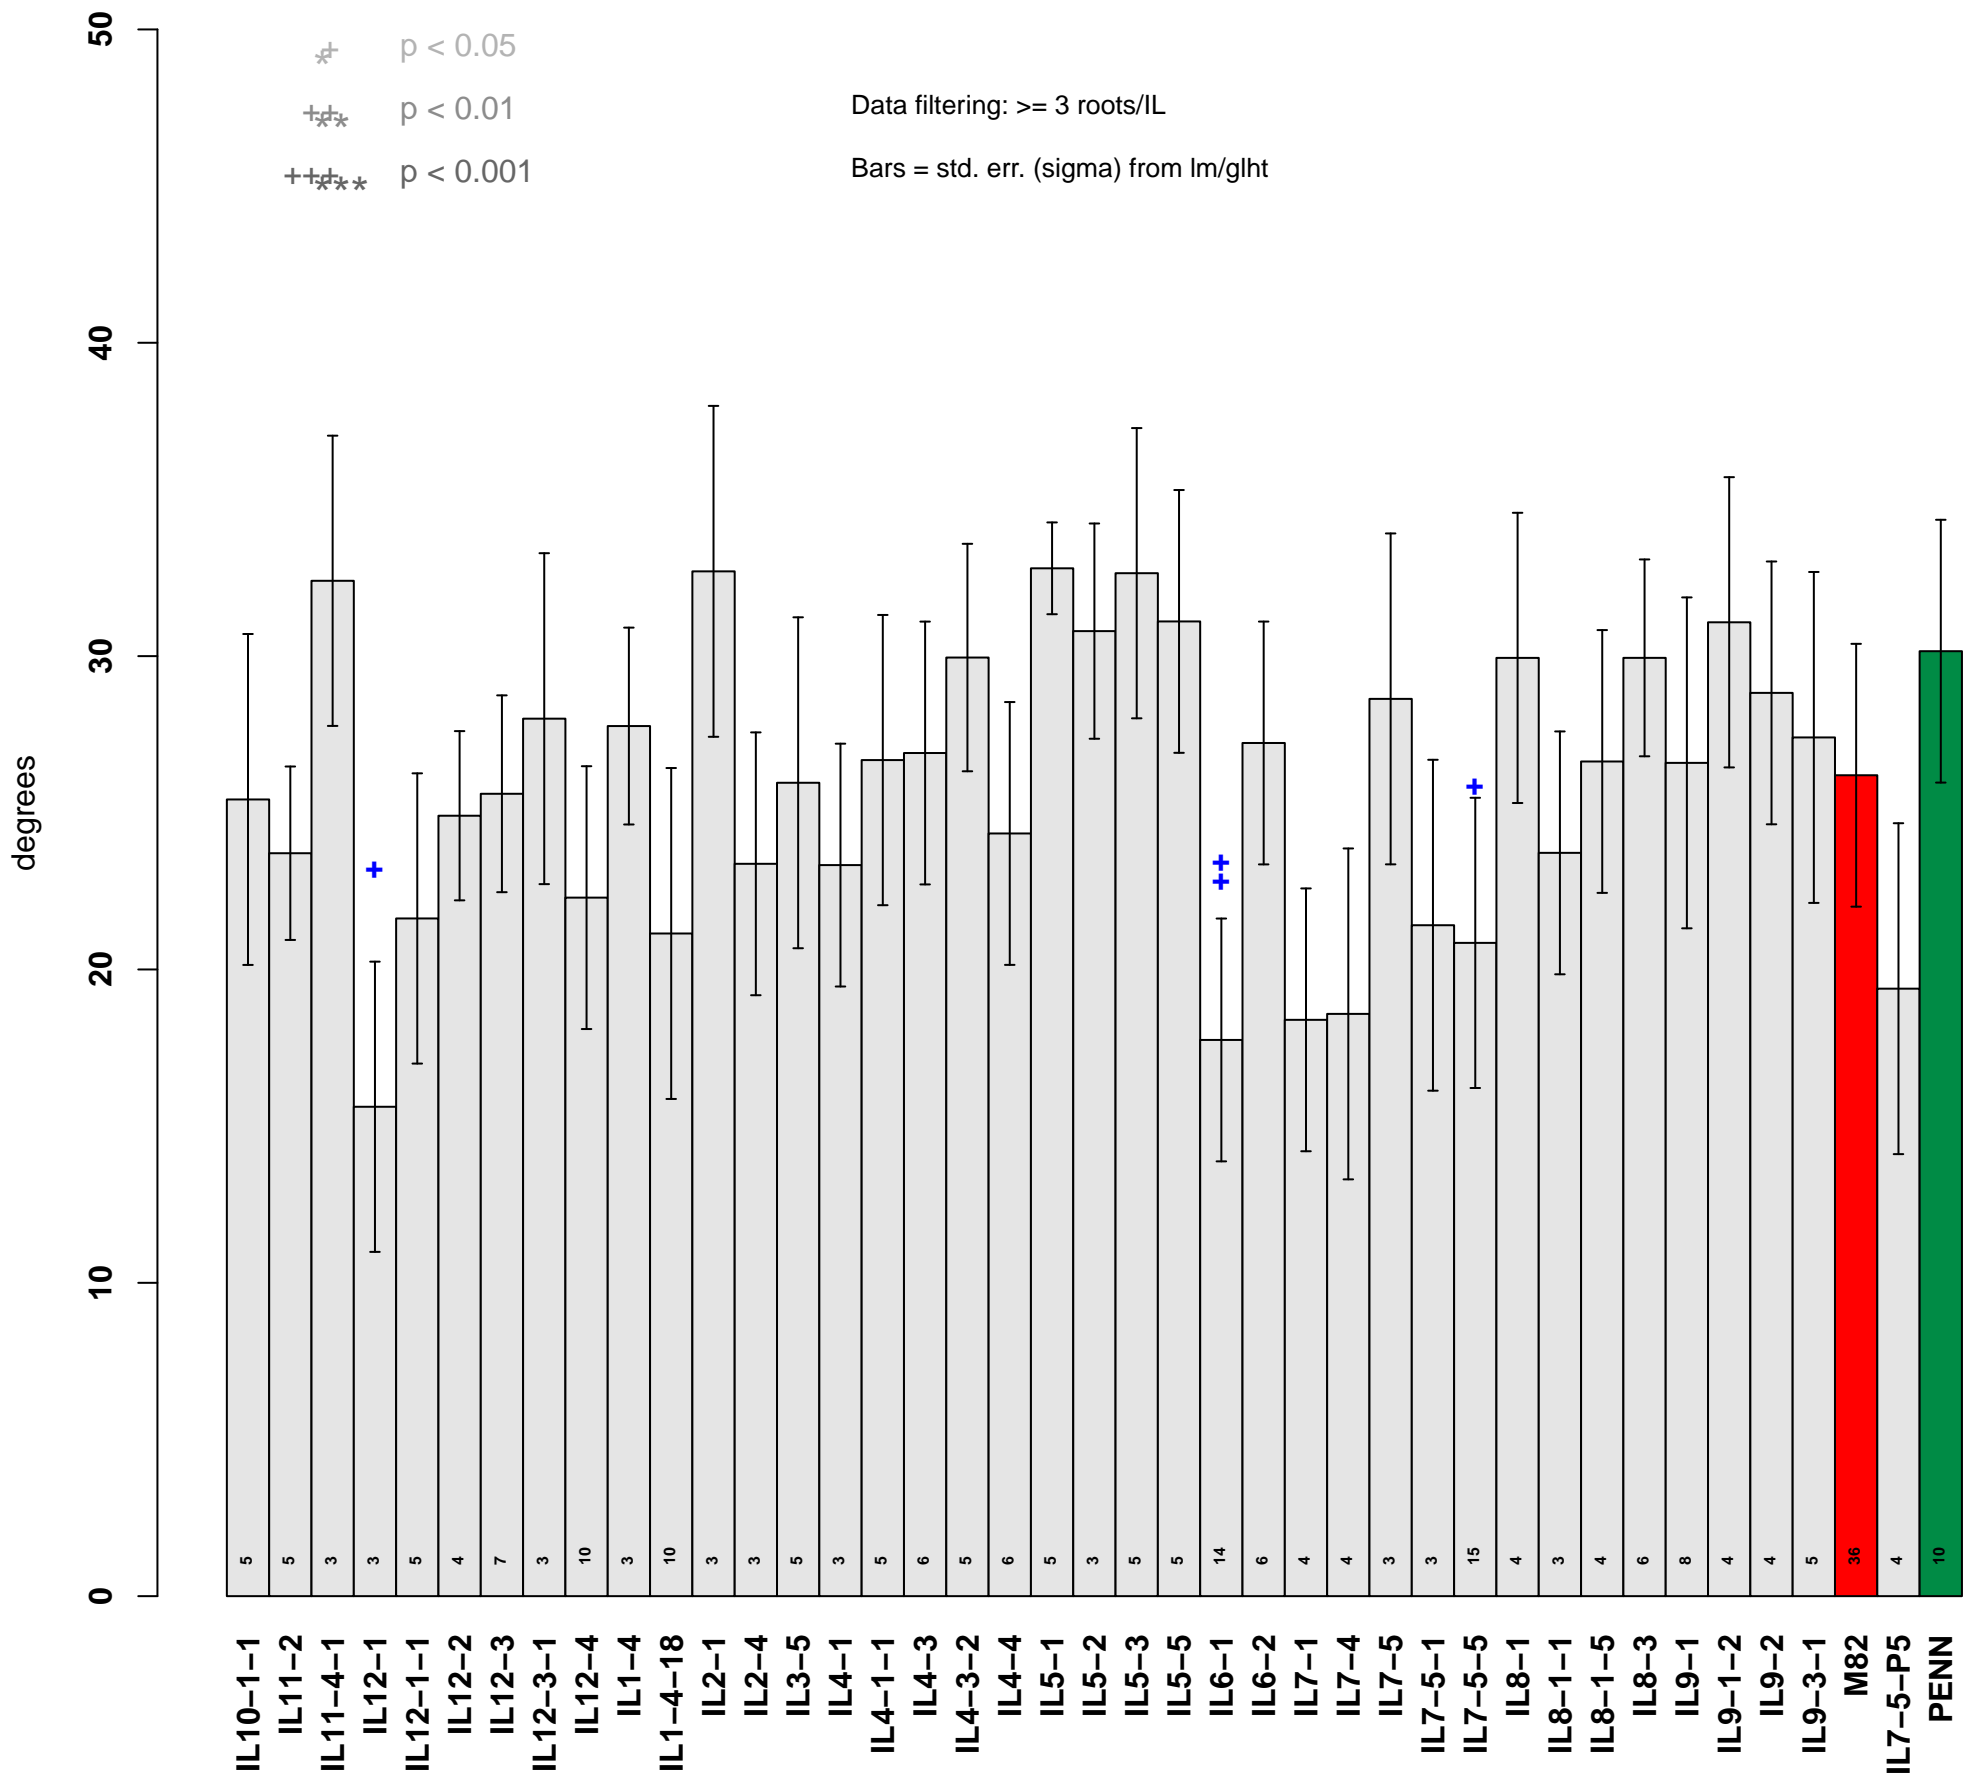

# Angle Thru T11

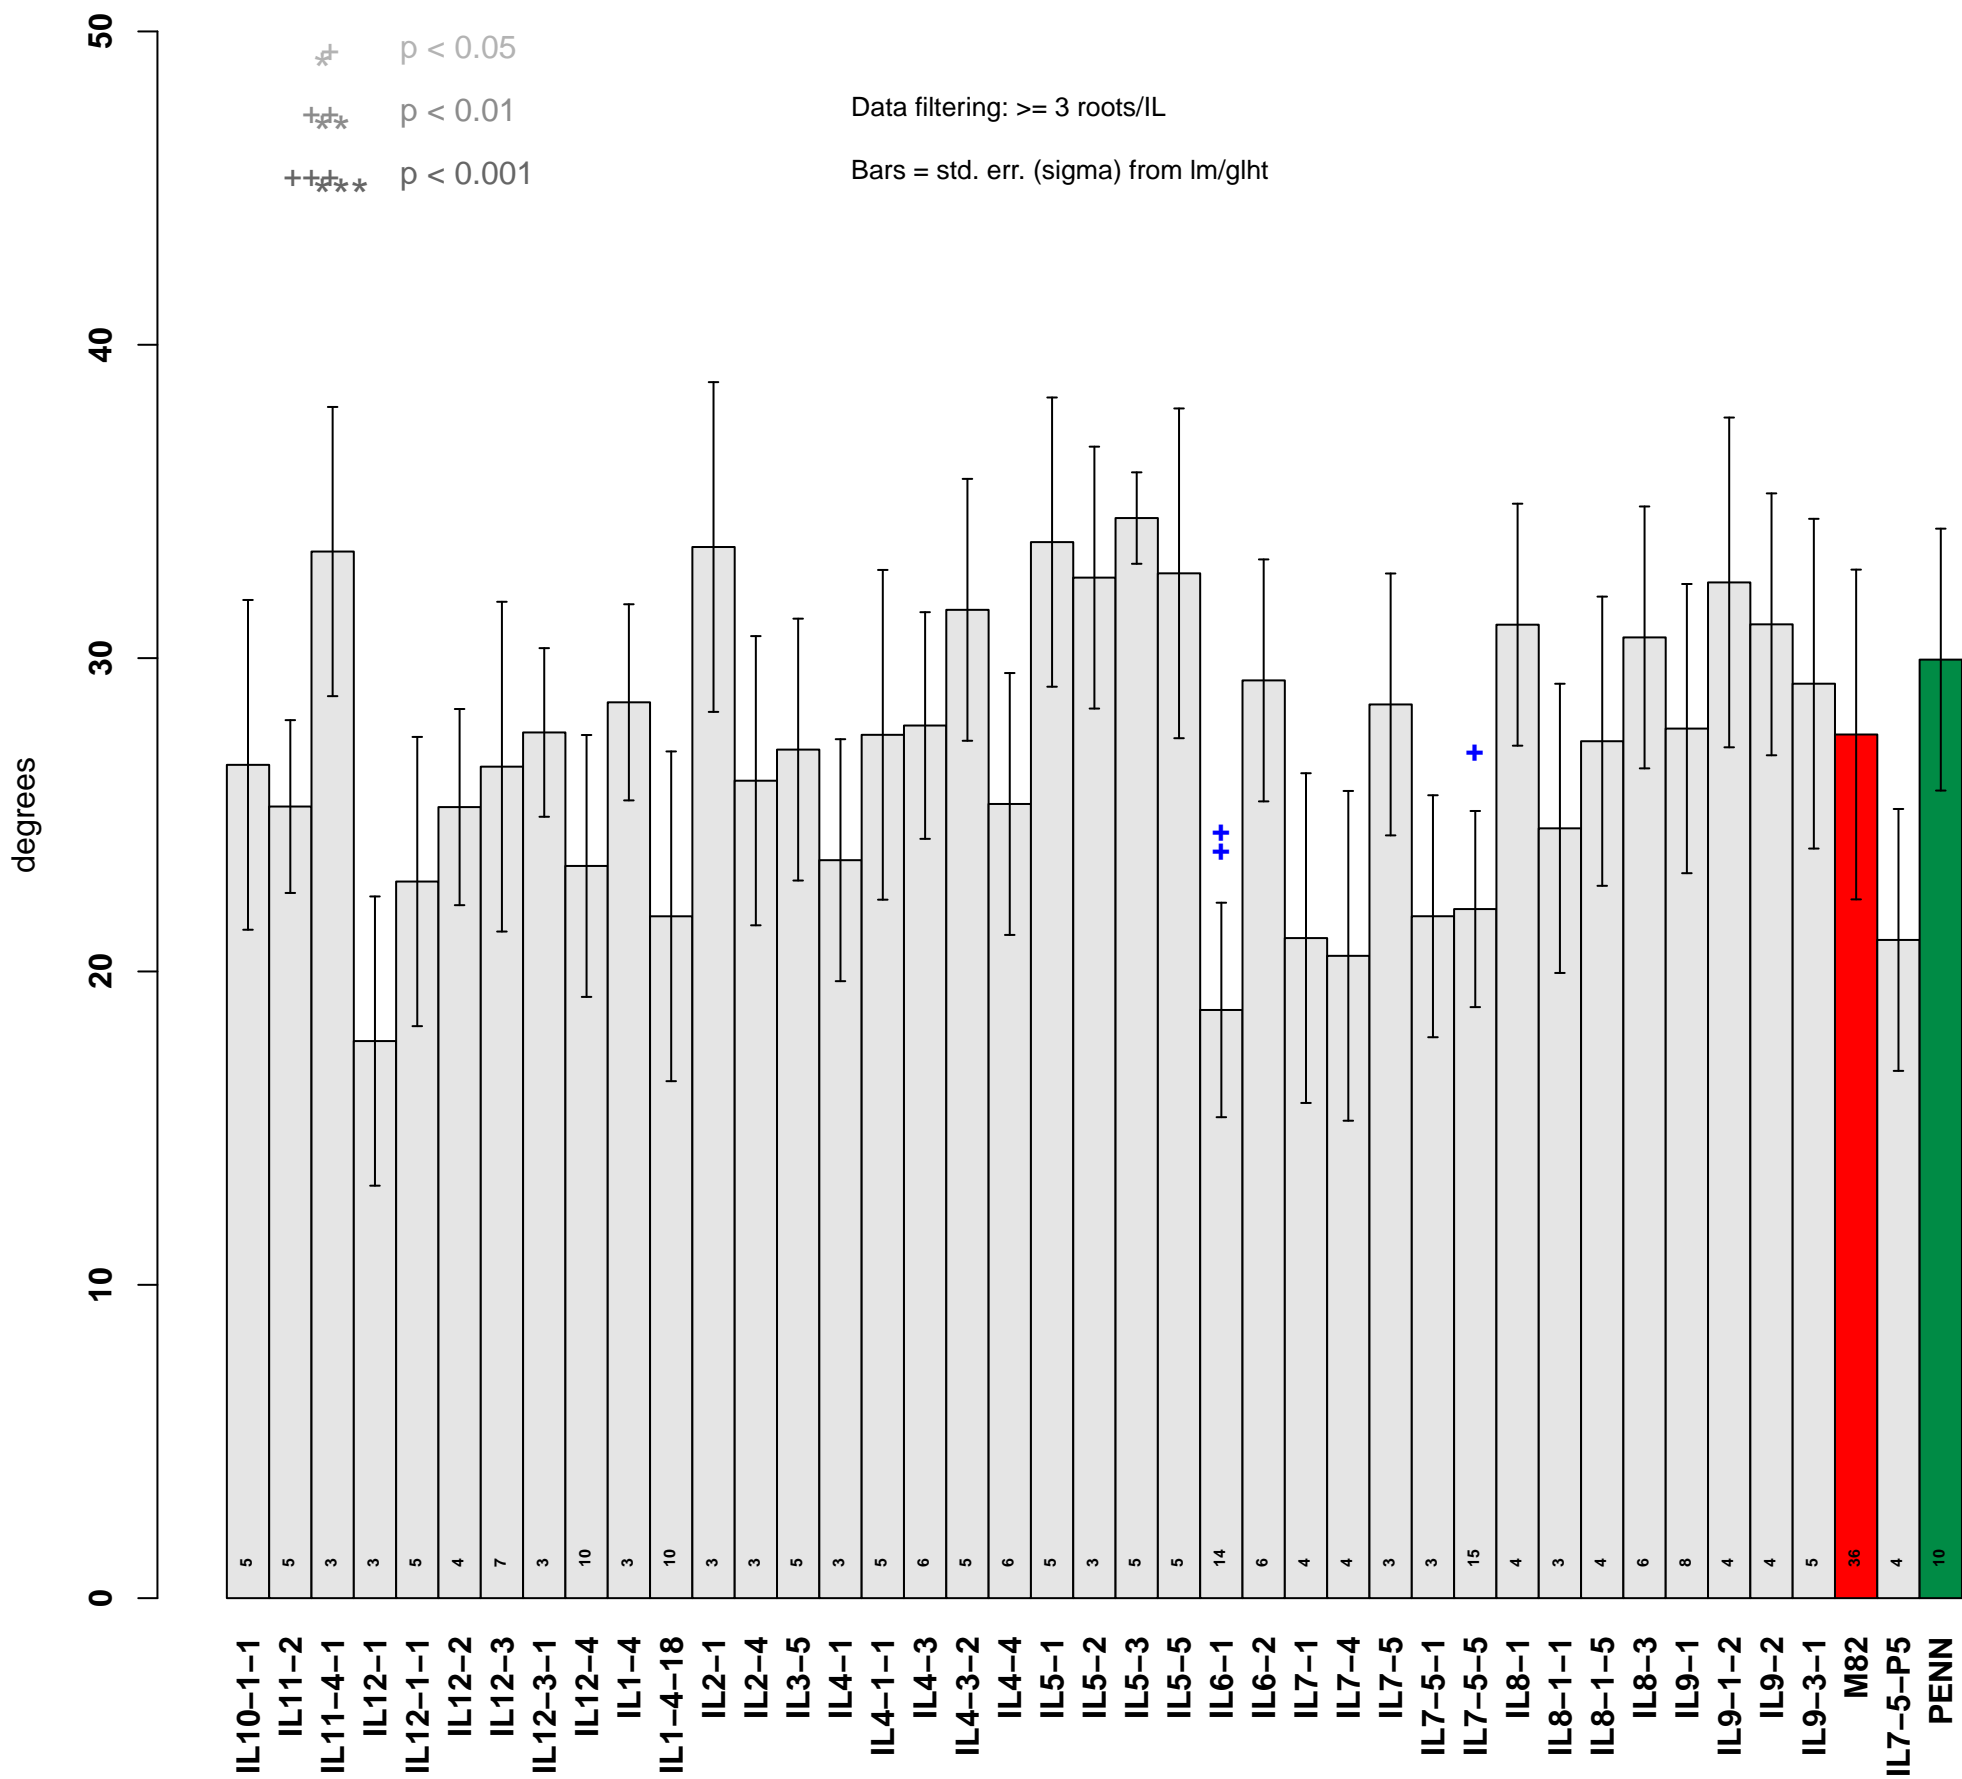

# Angle Thru T12

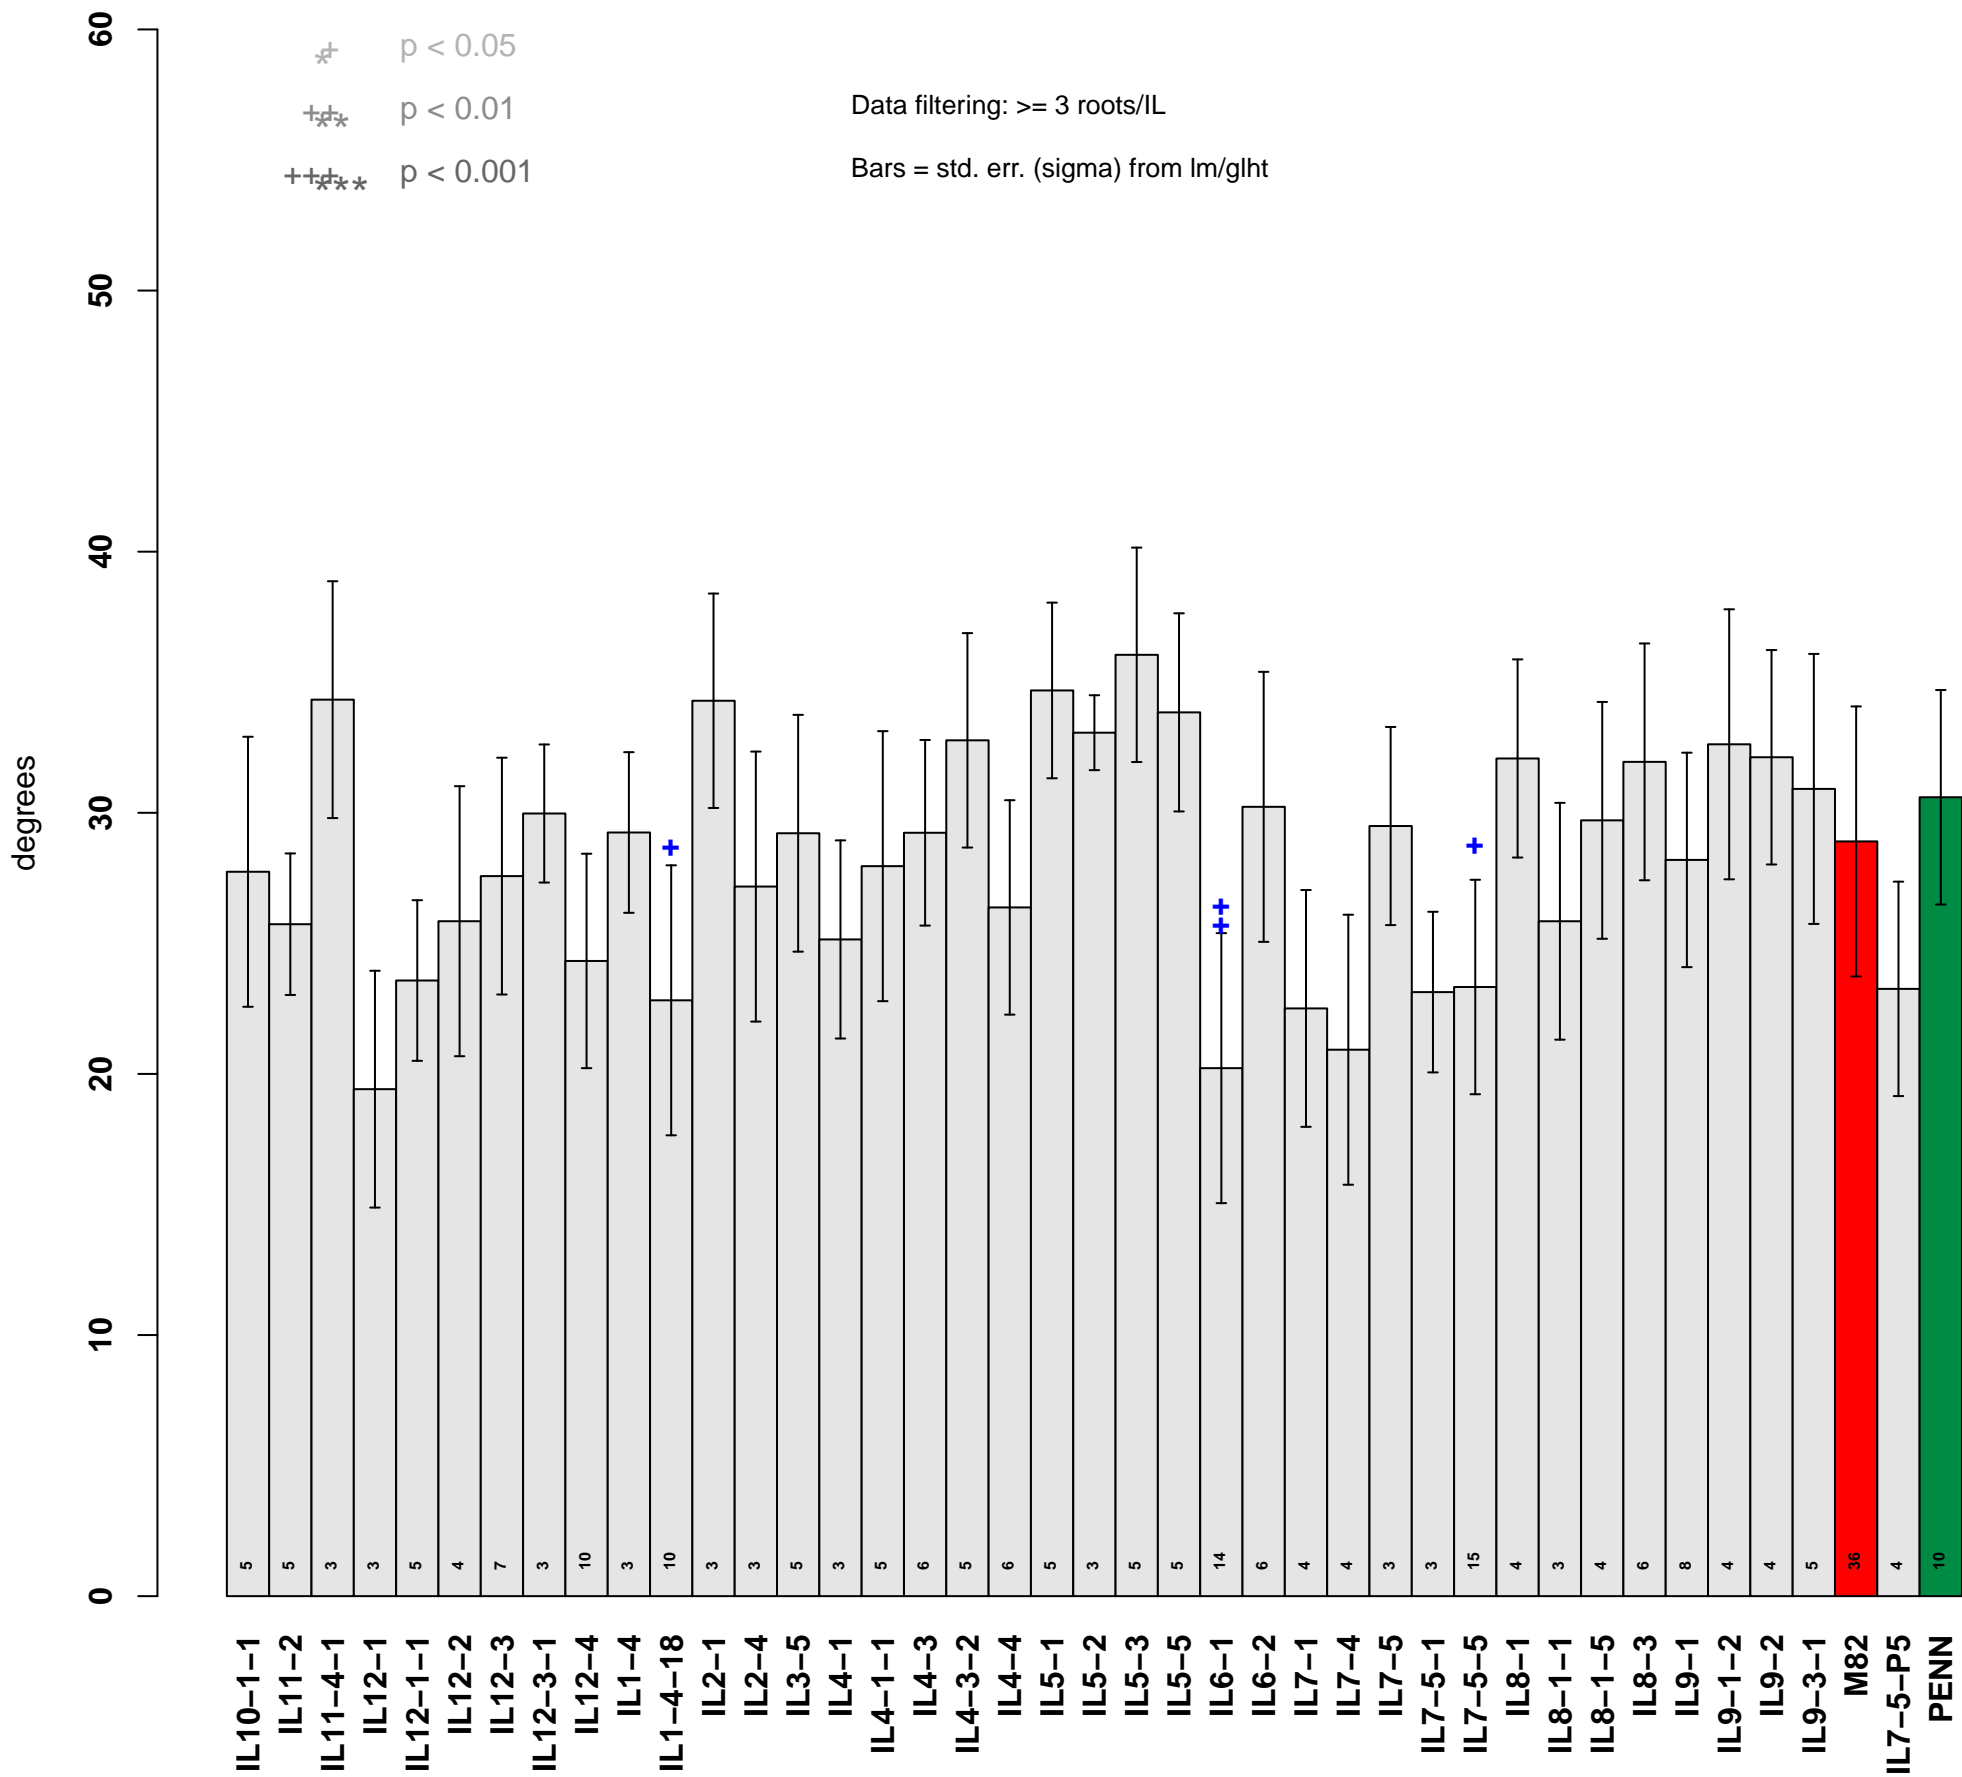

# Angle Thru T13

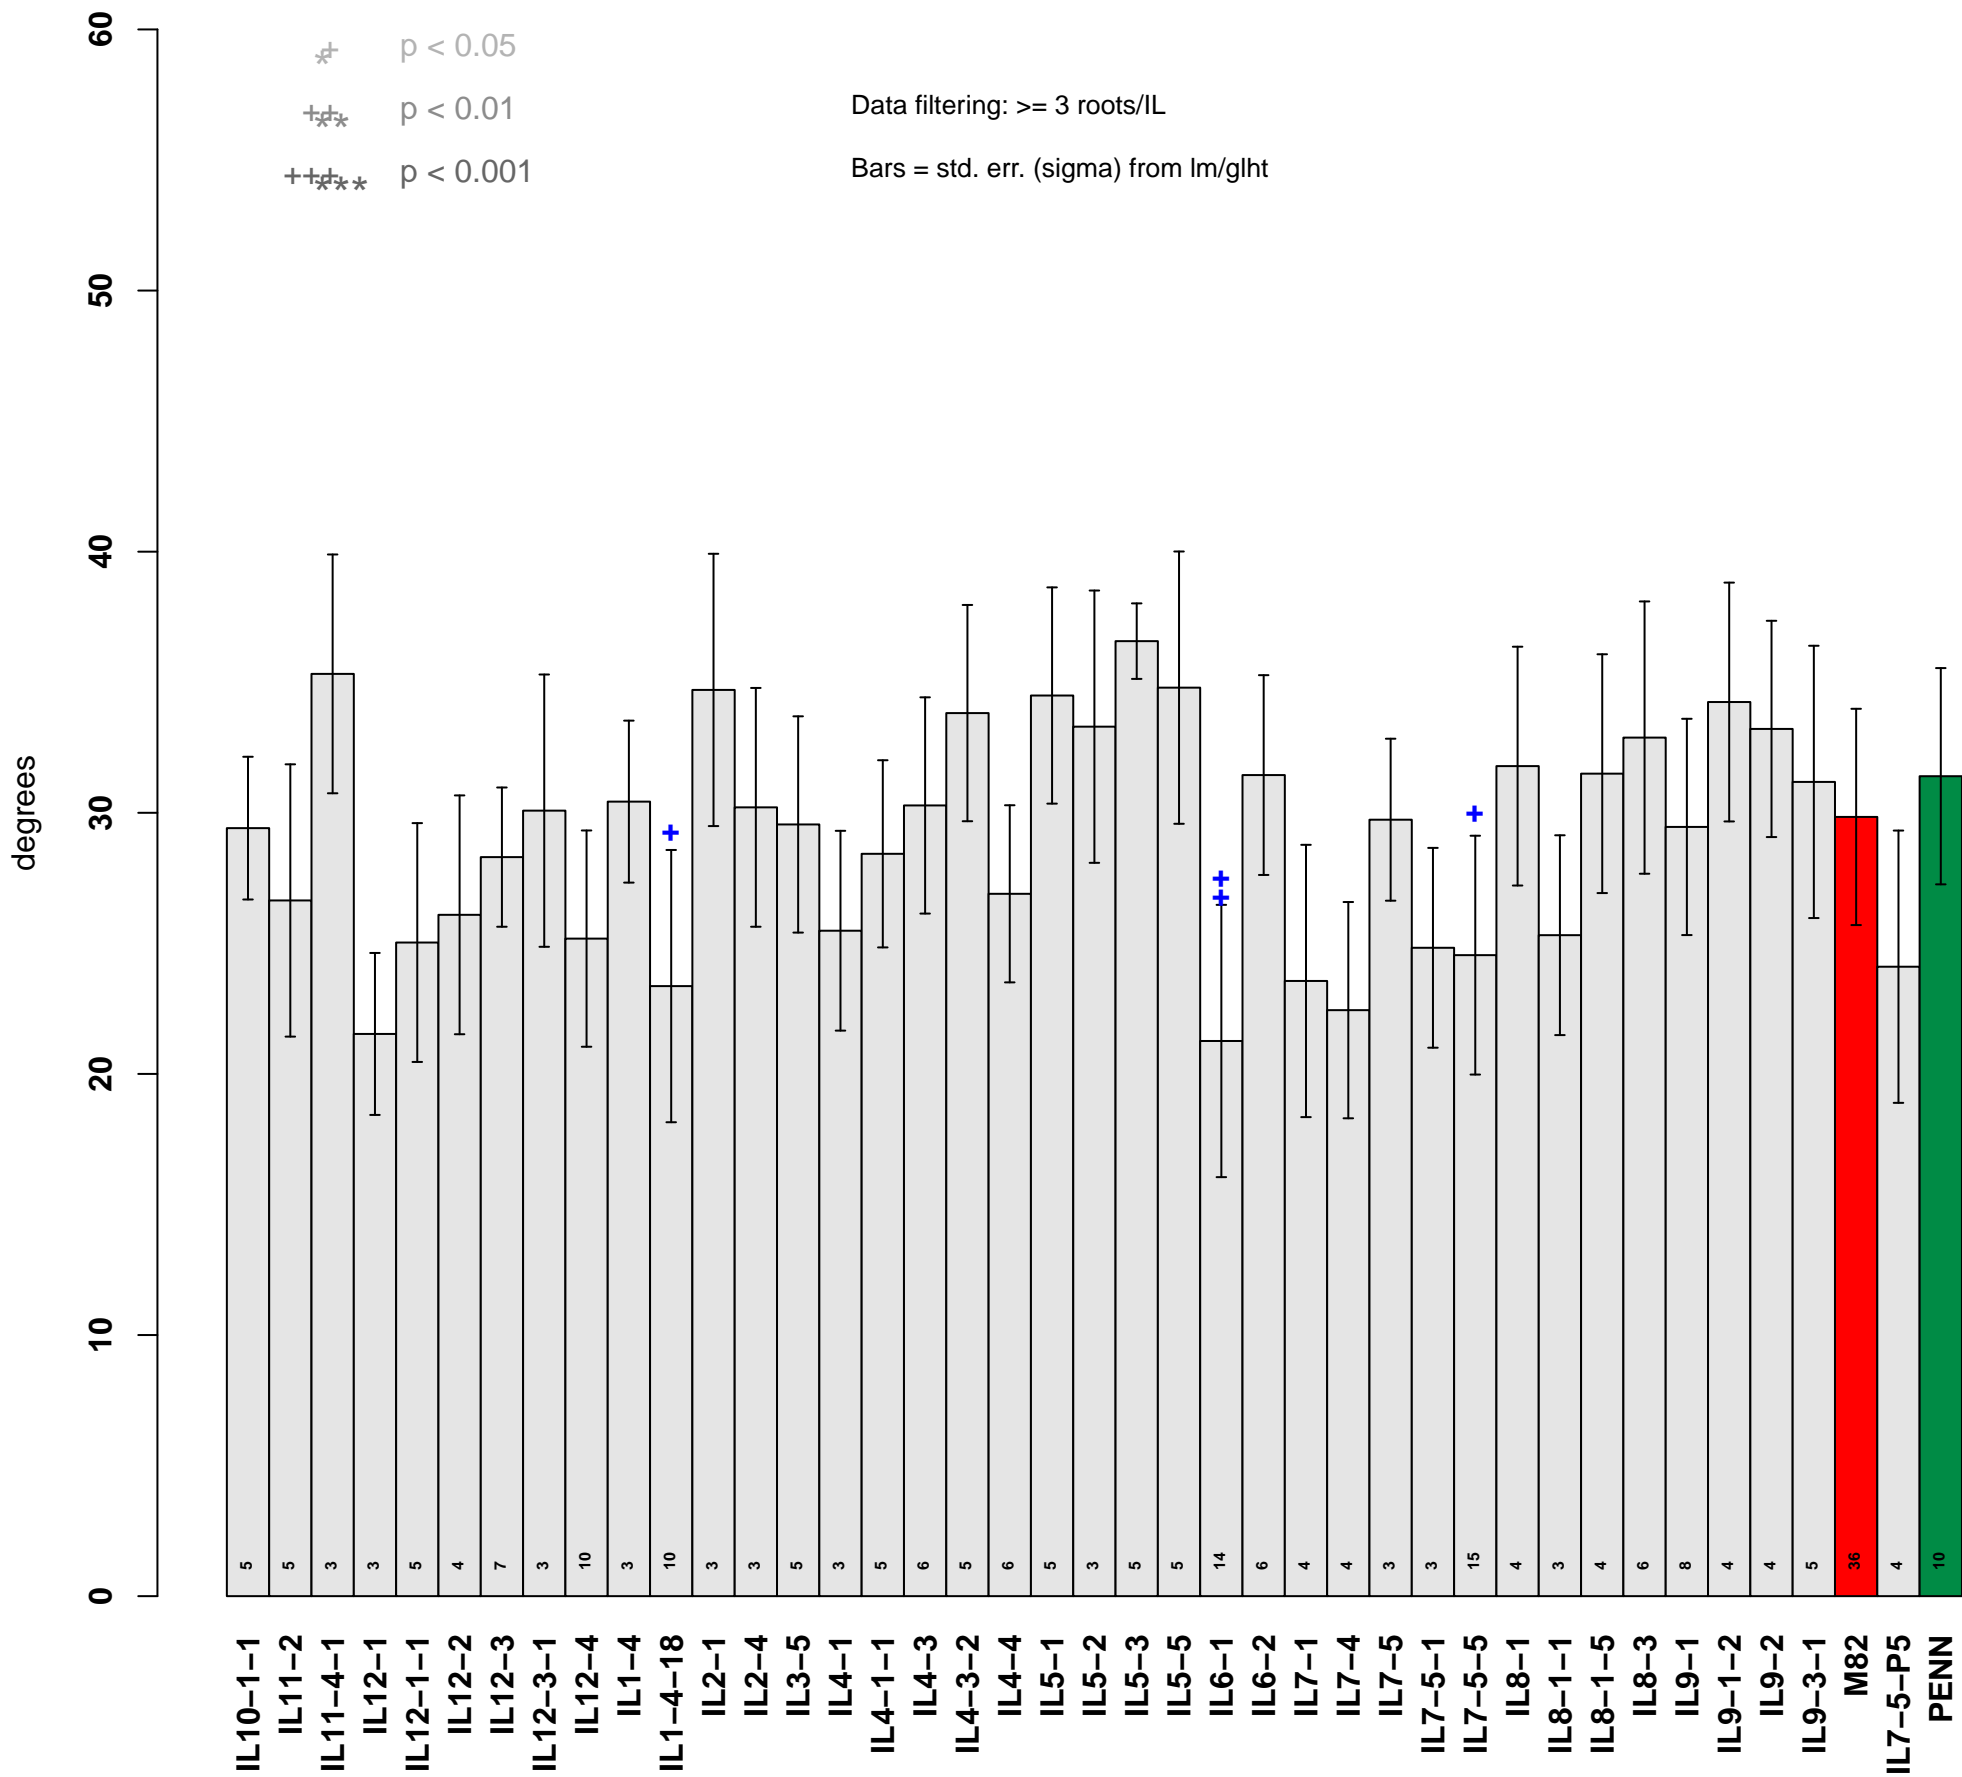

# Angle Thru T14

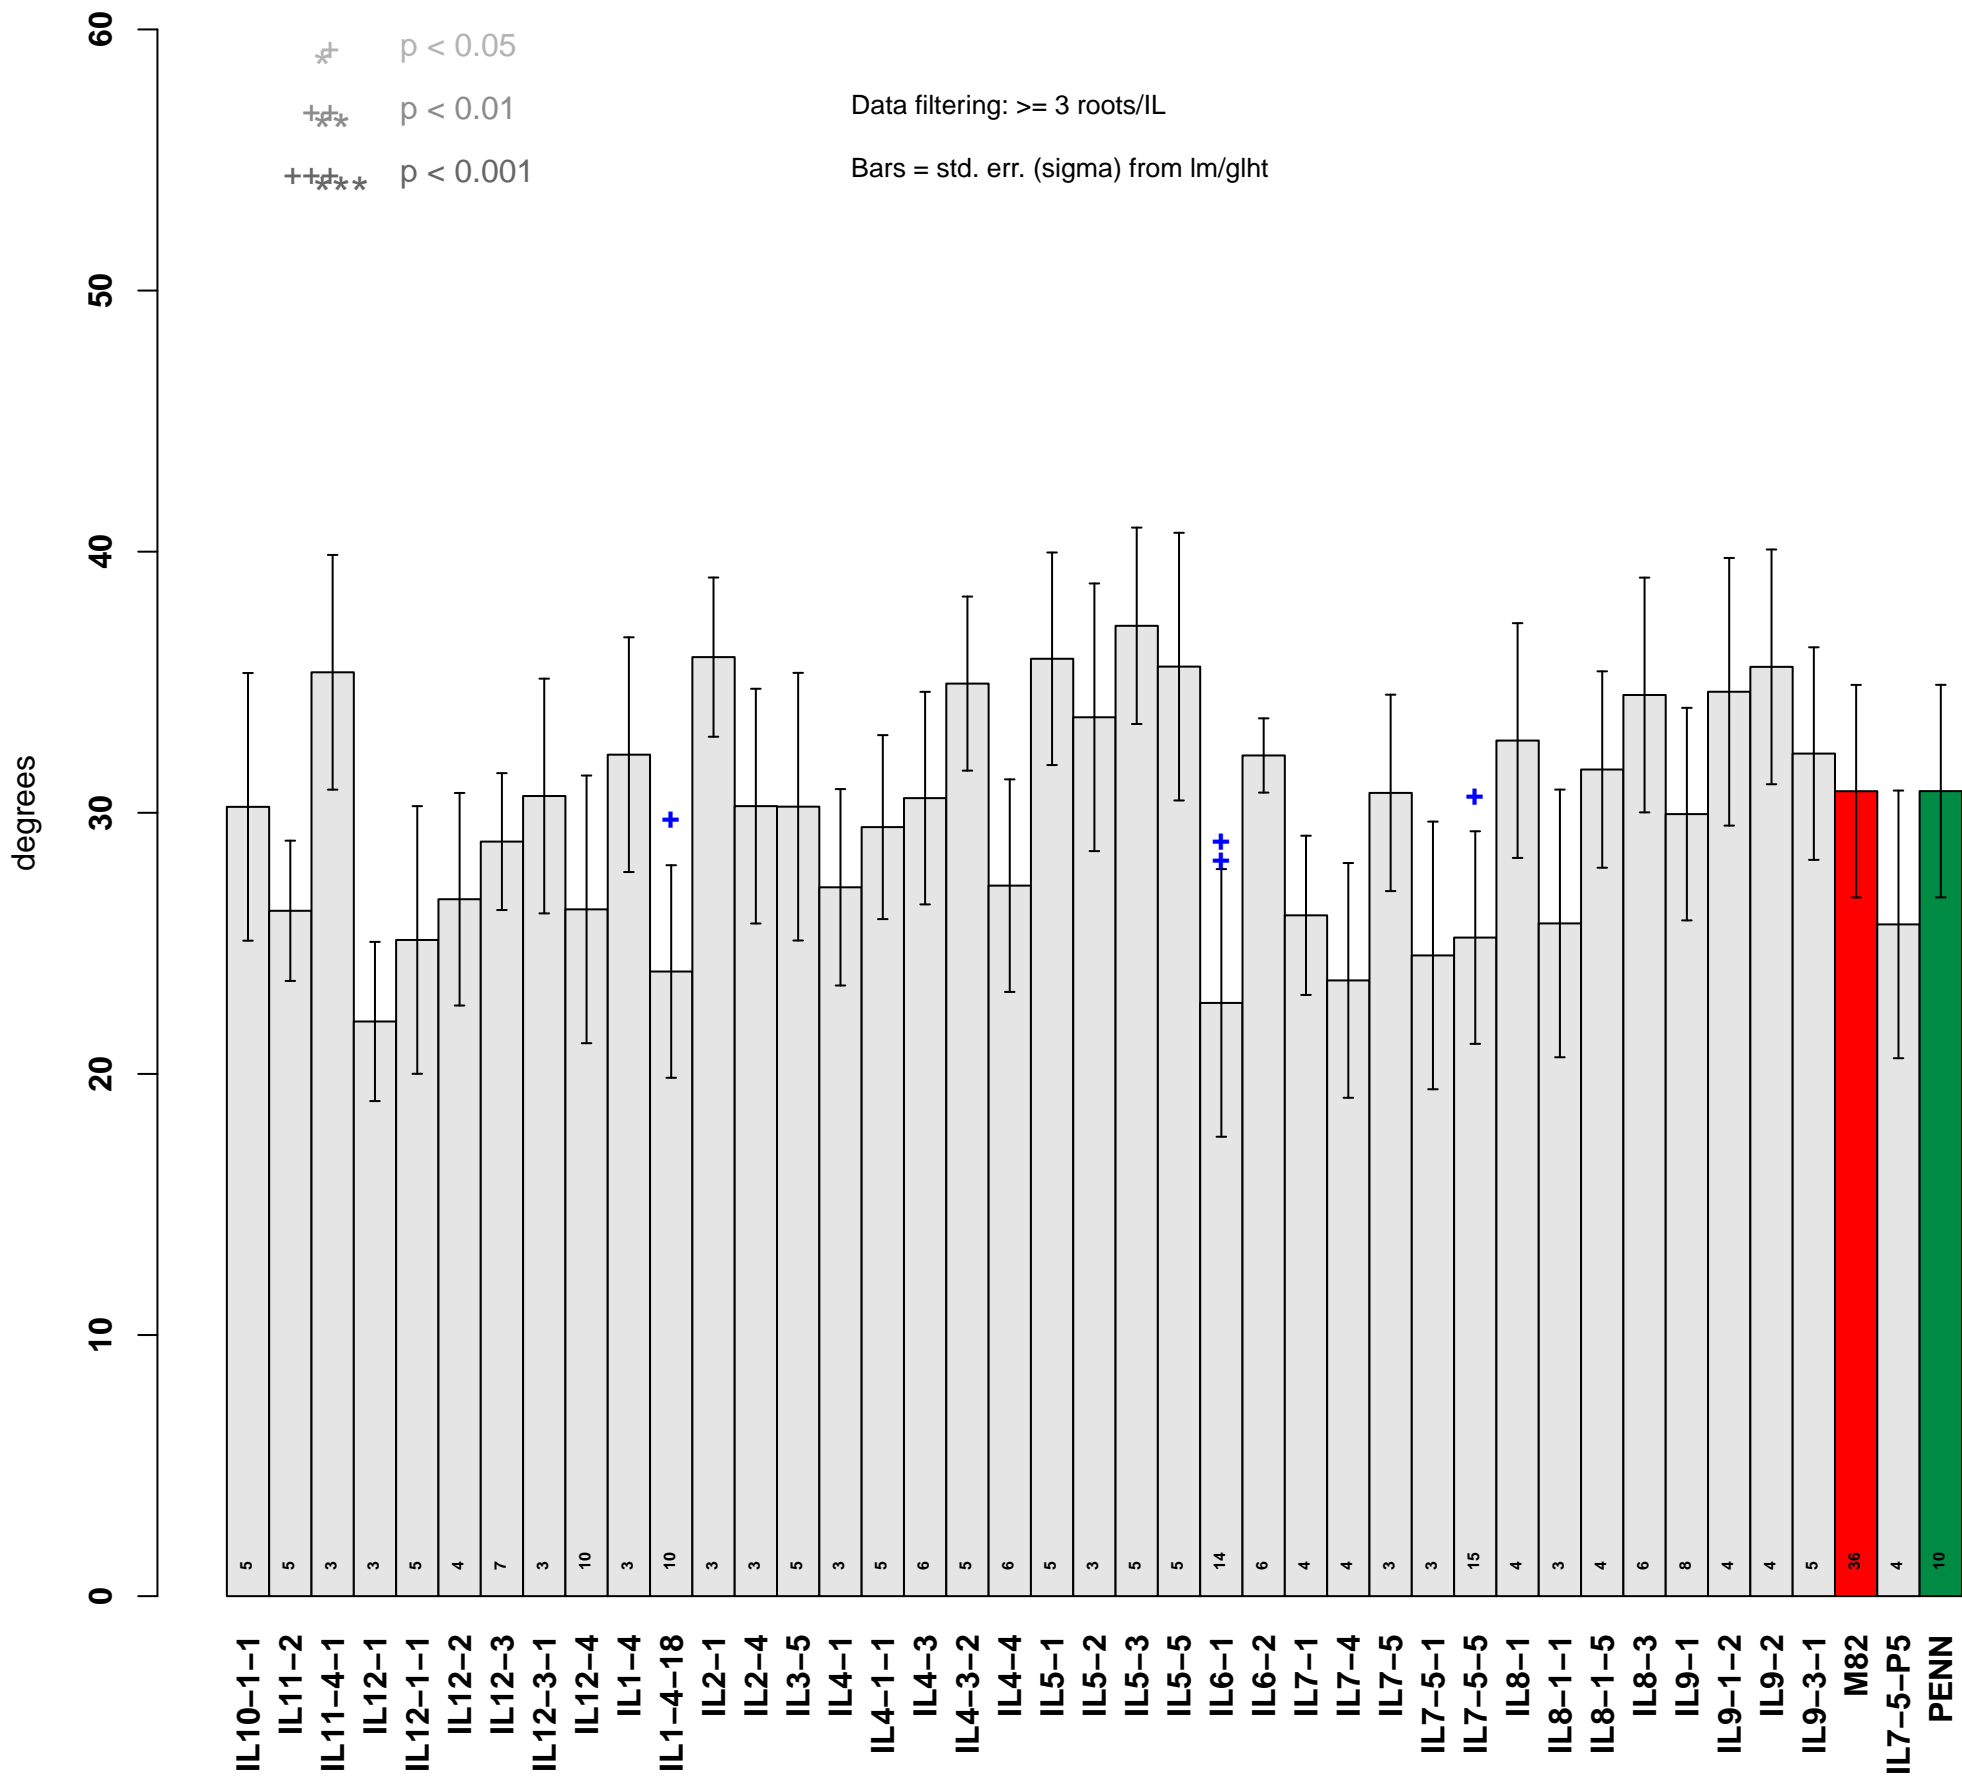

# Angle Thru T15

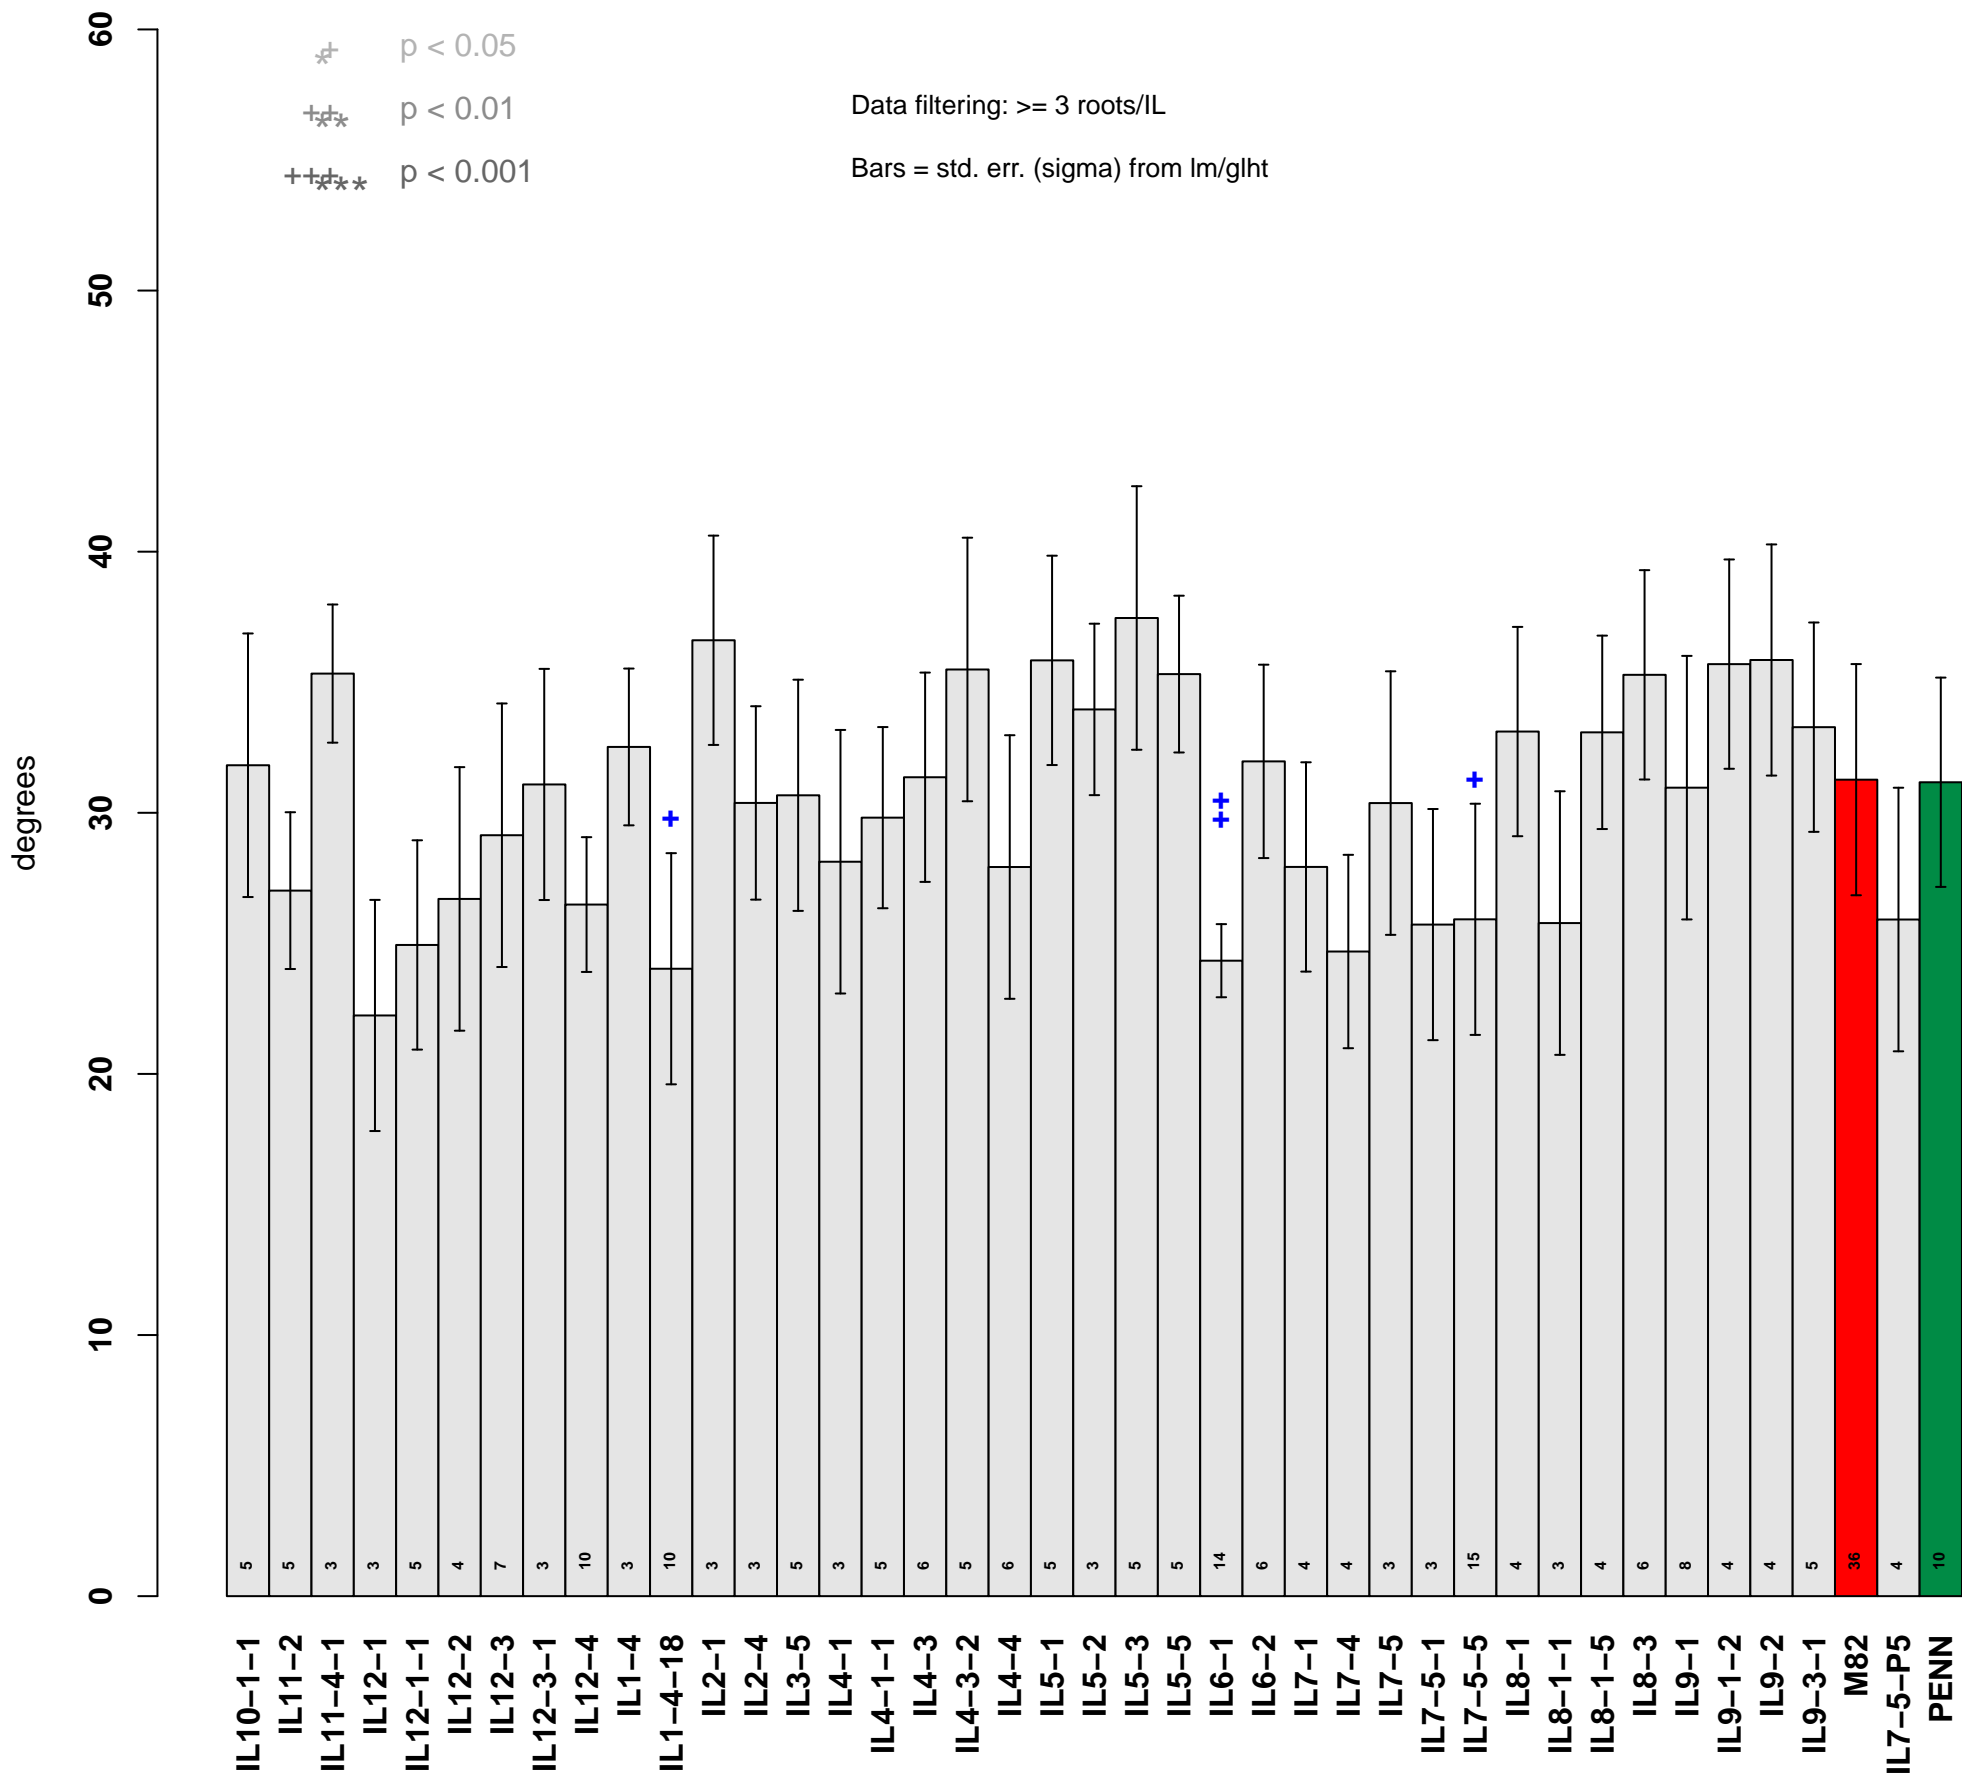



# Angle Thru T16

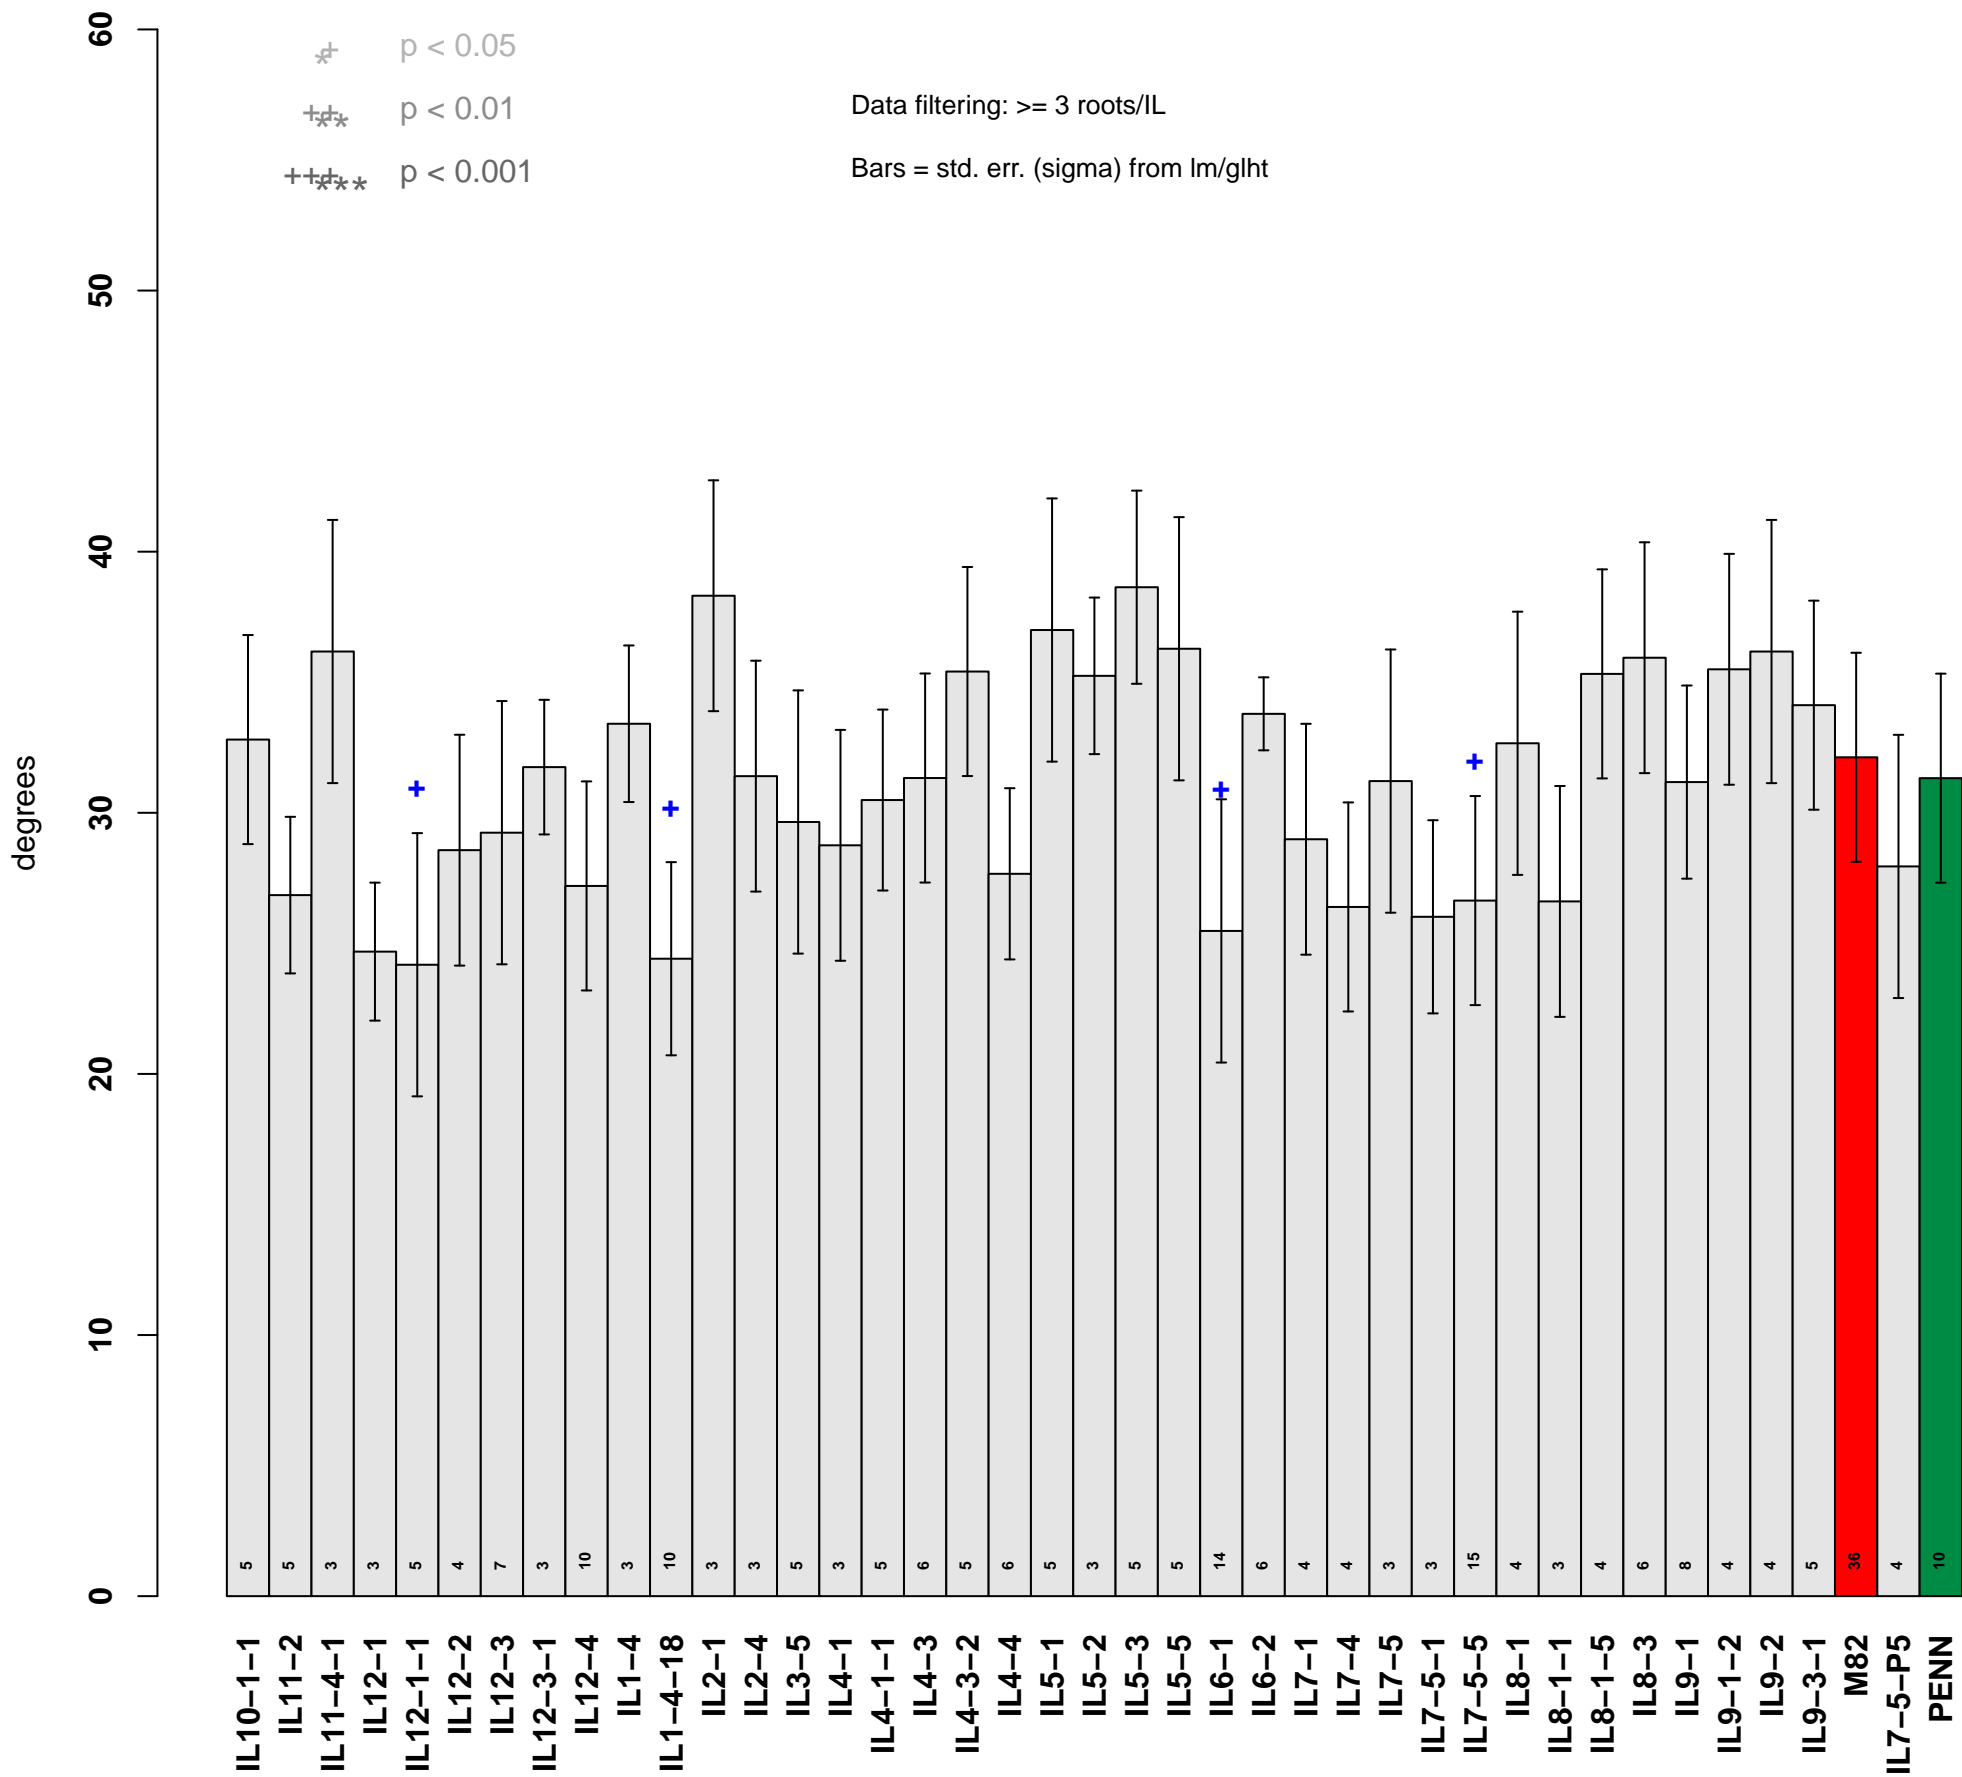

# Angle Thru T17

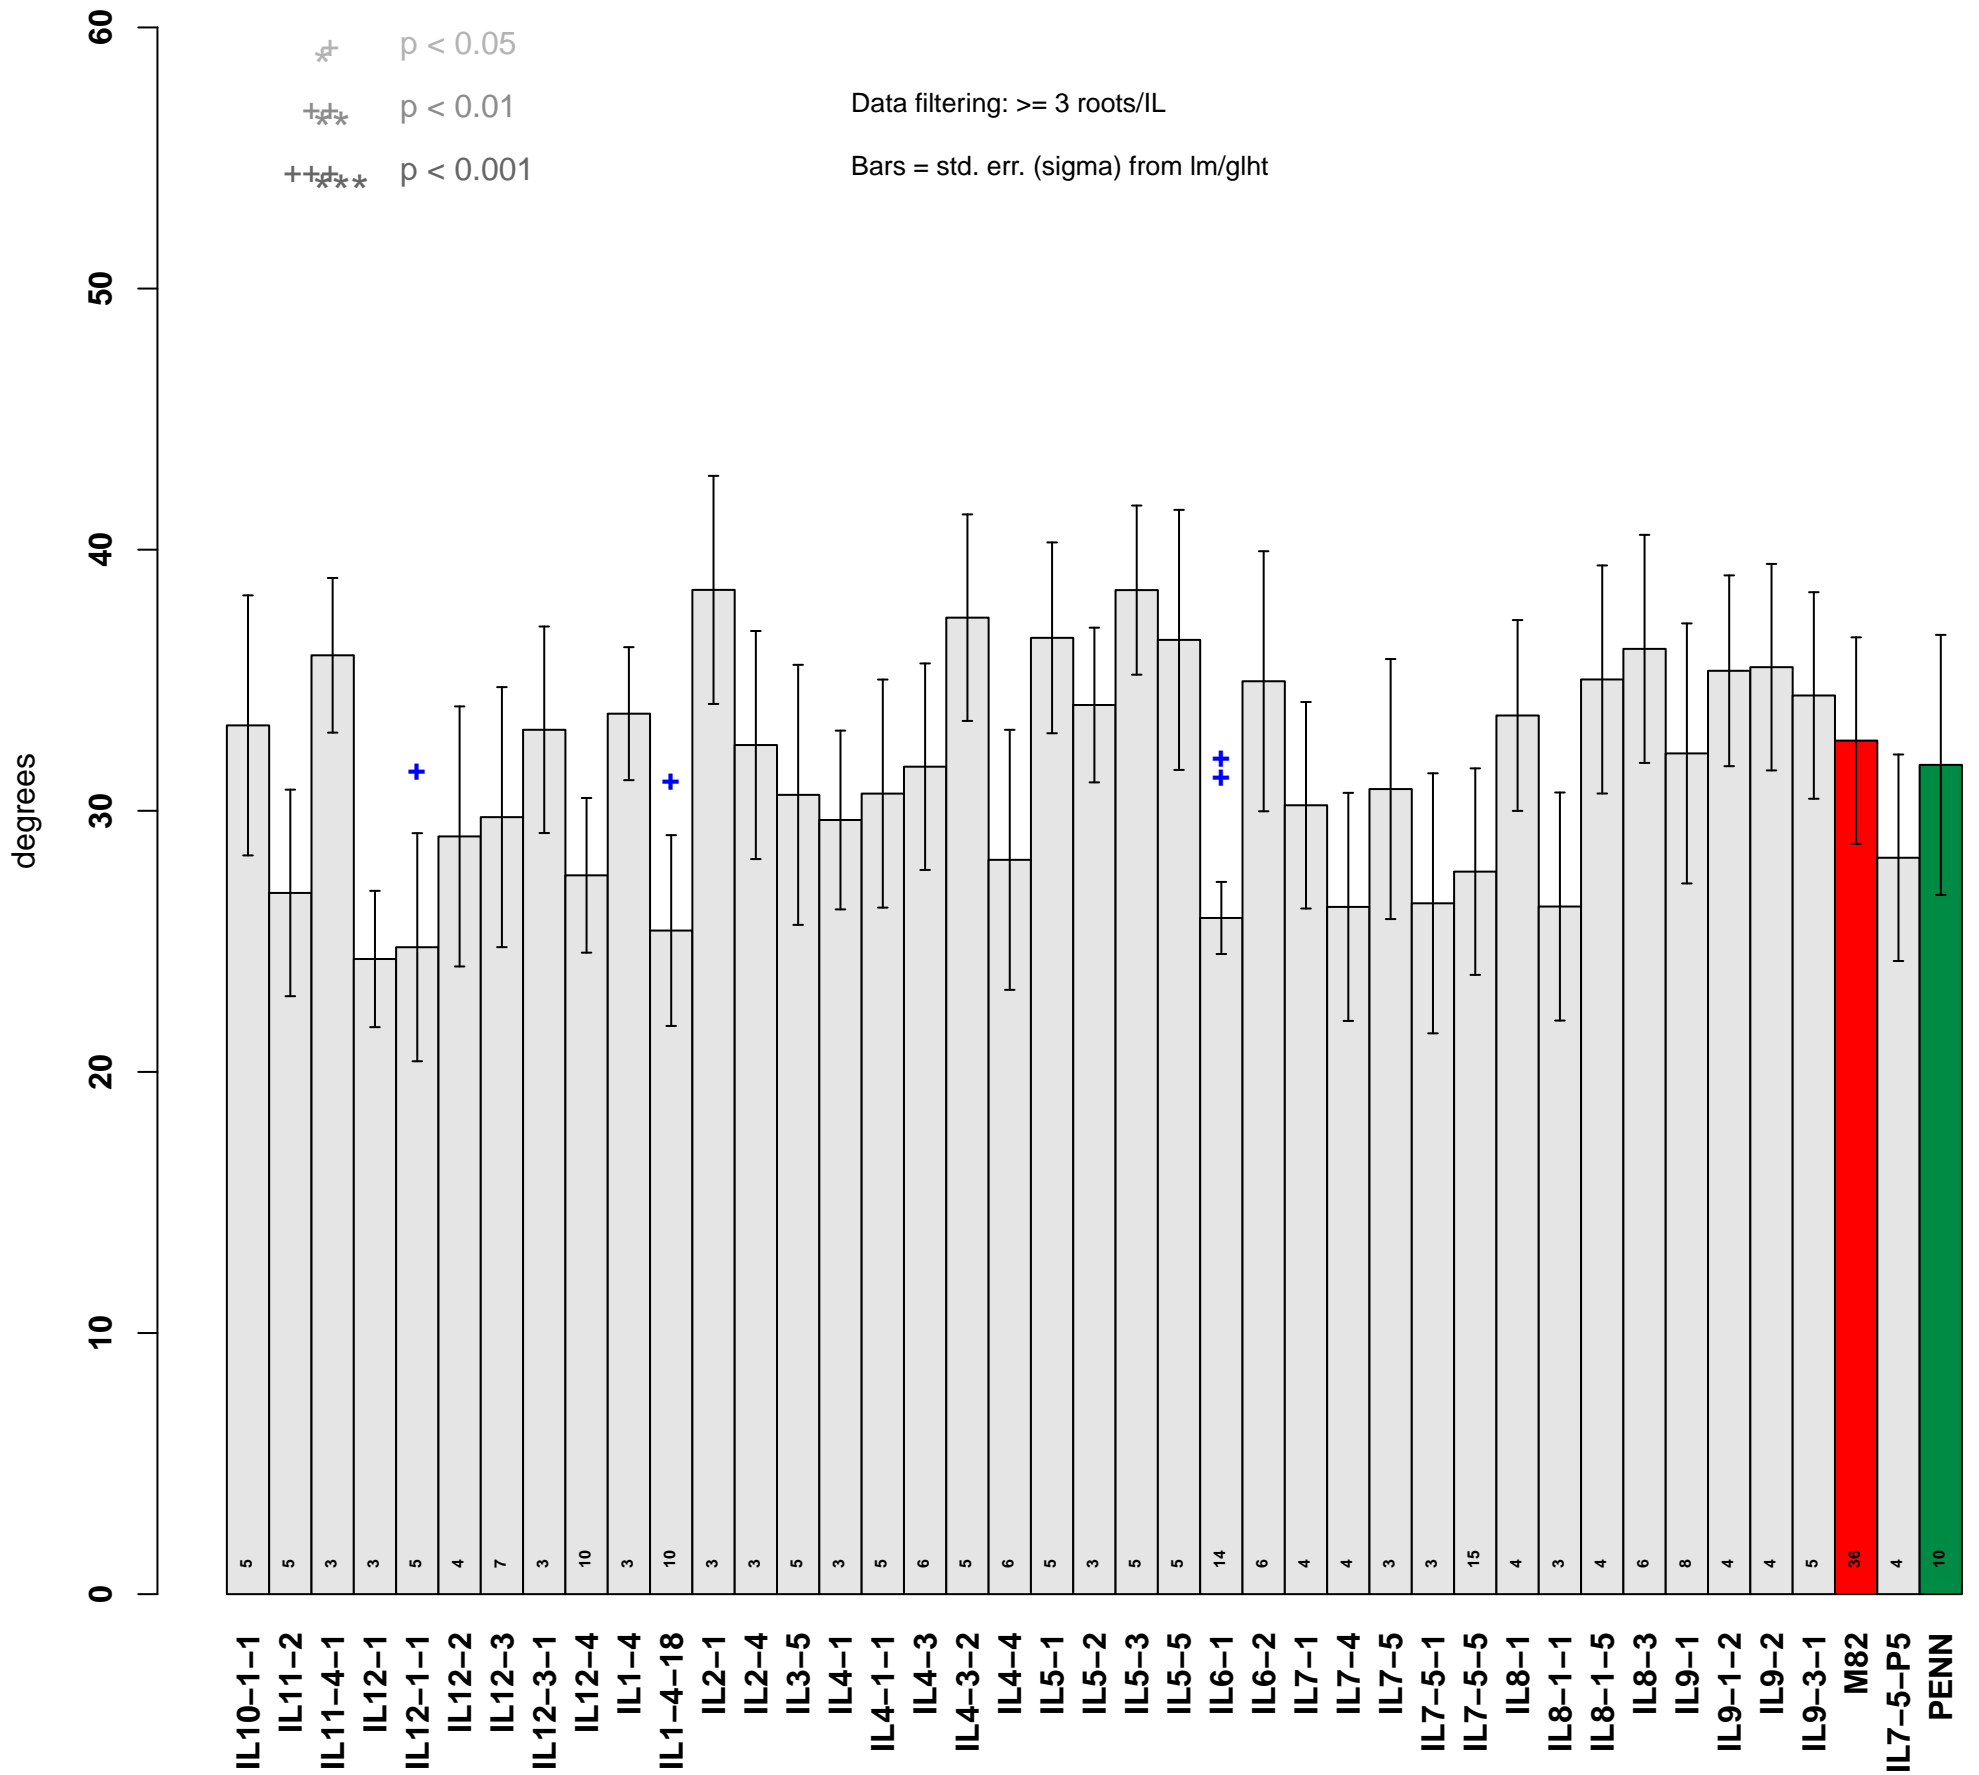

# Angle Thru T18

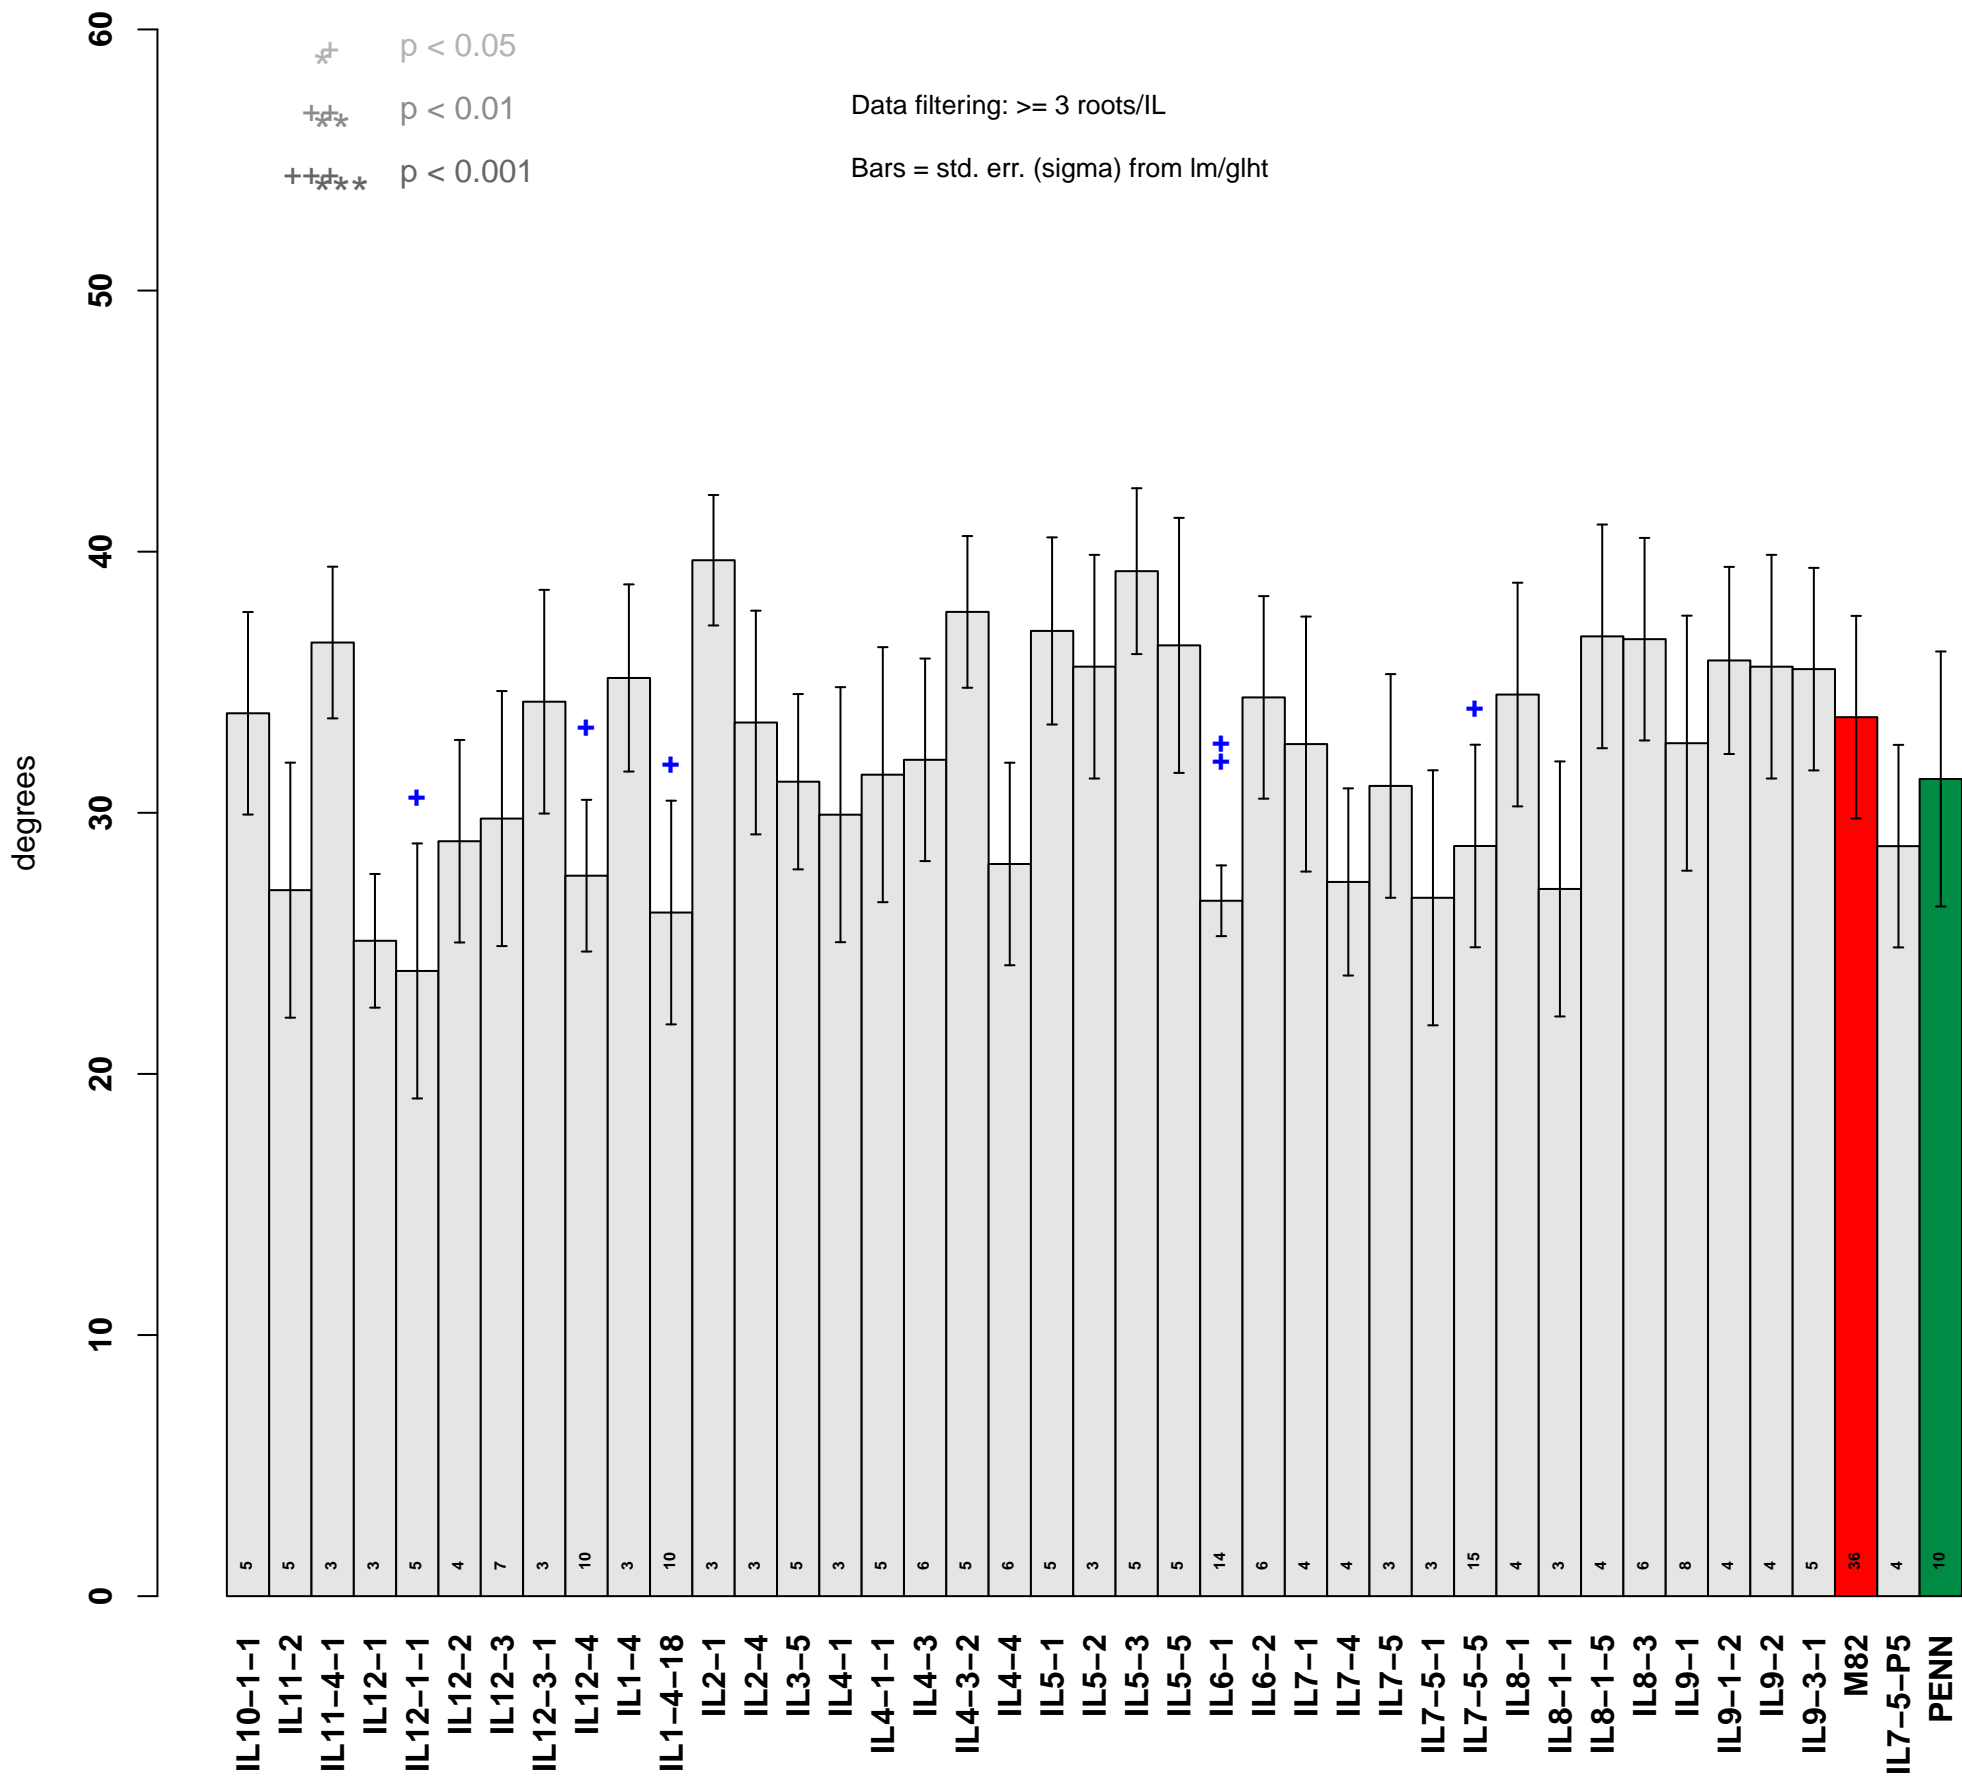

# Angle Thru T19

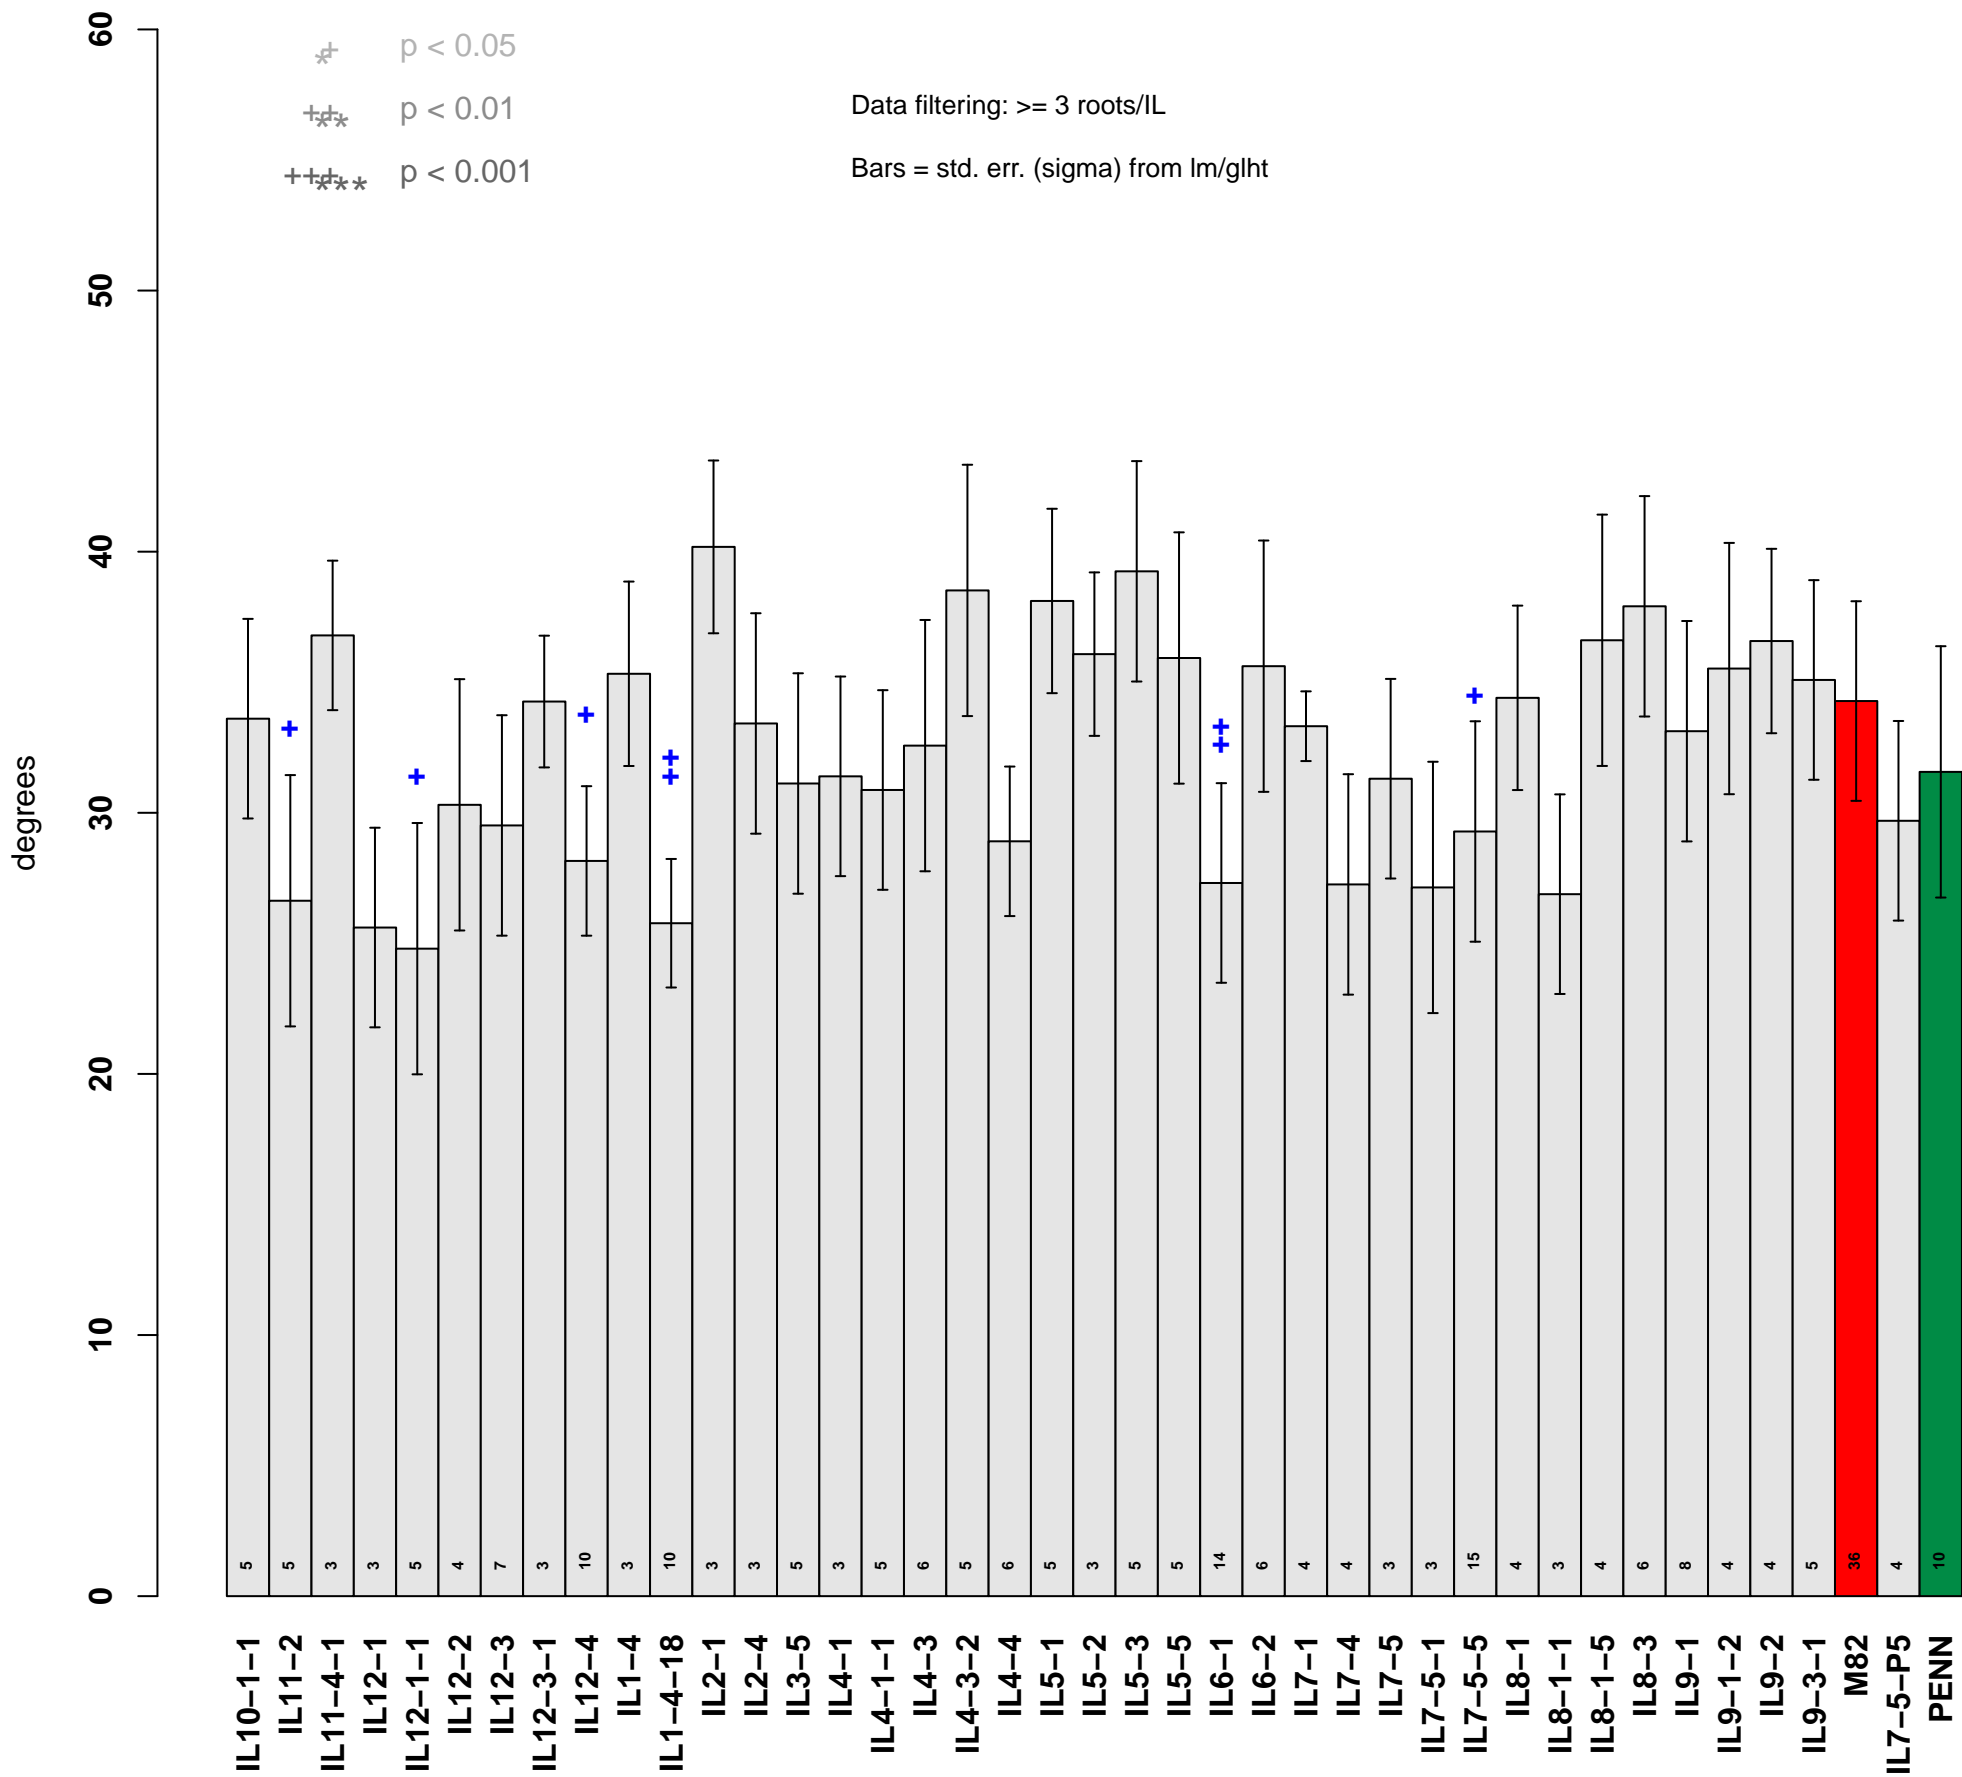

# Angle Thru T20

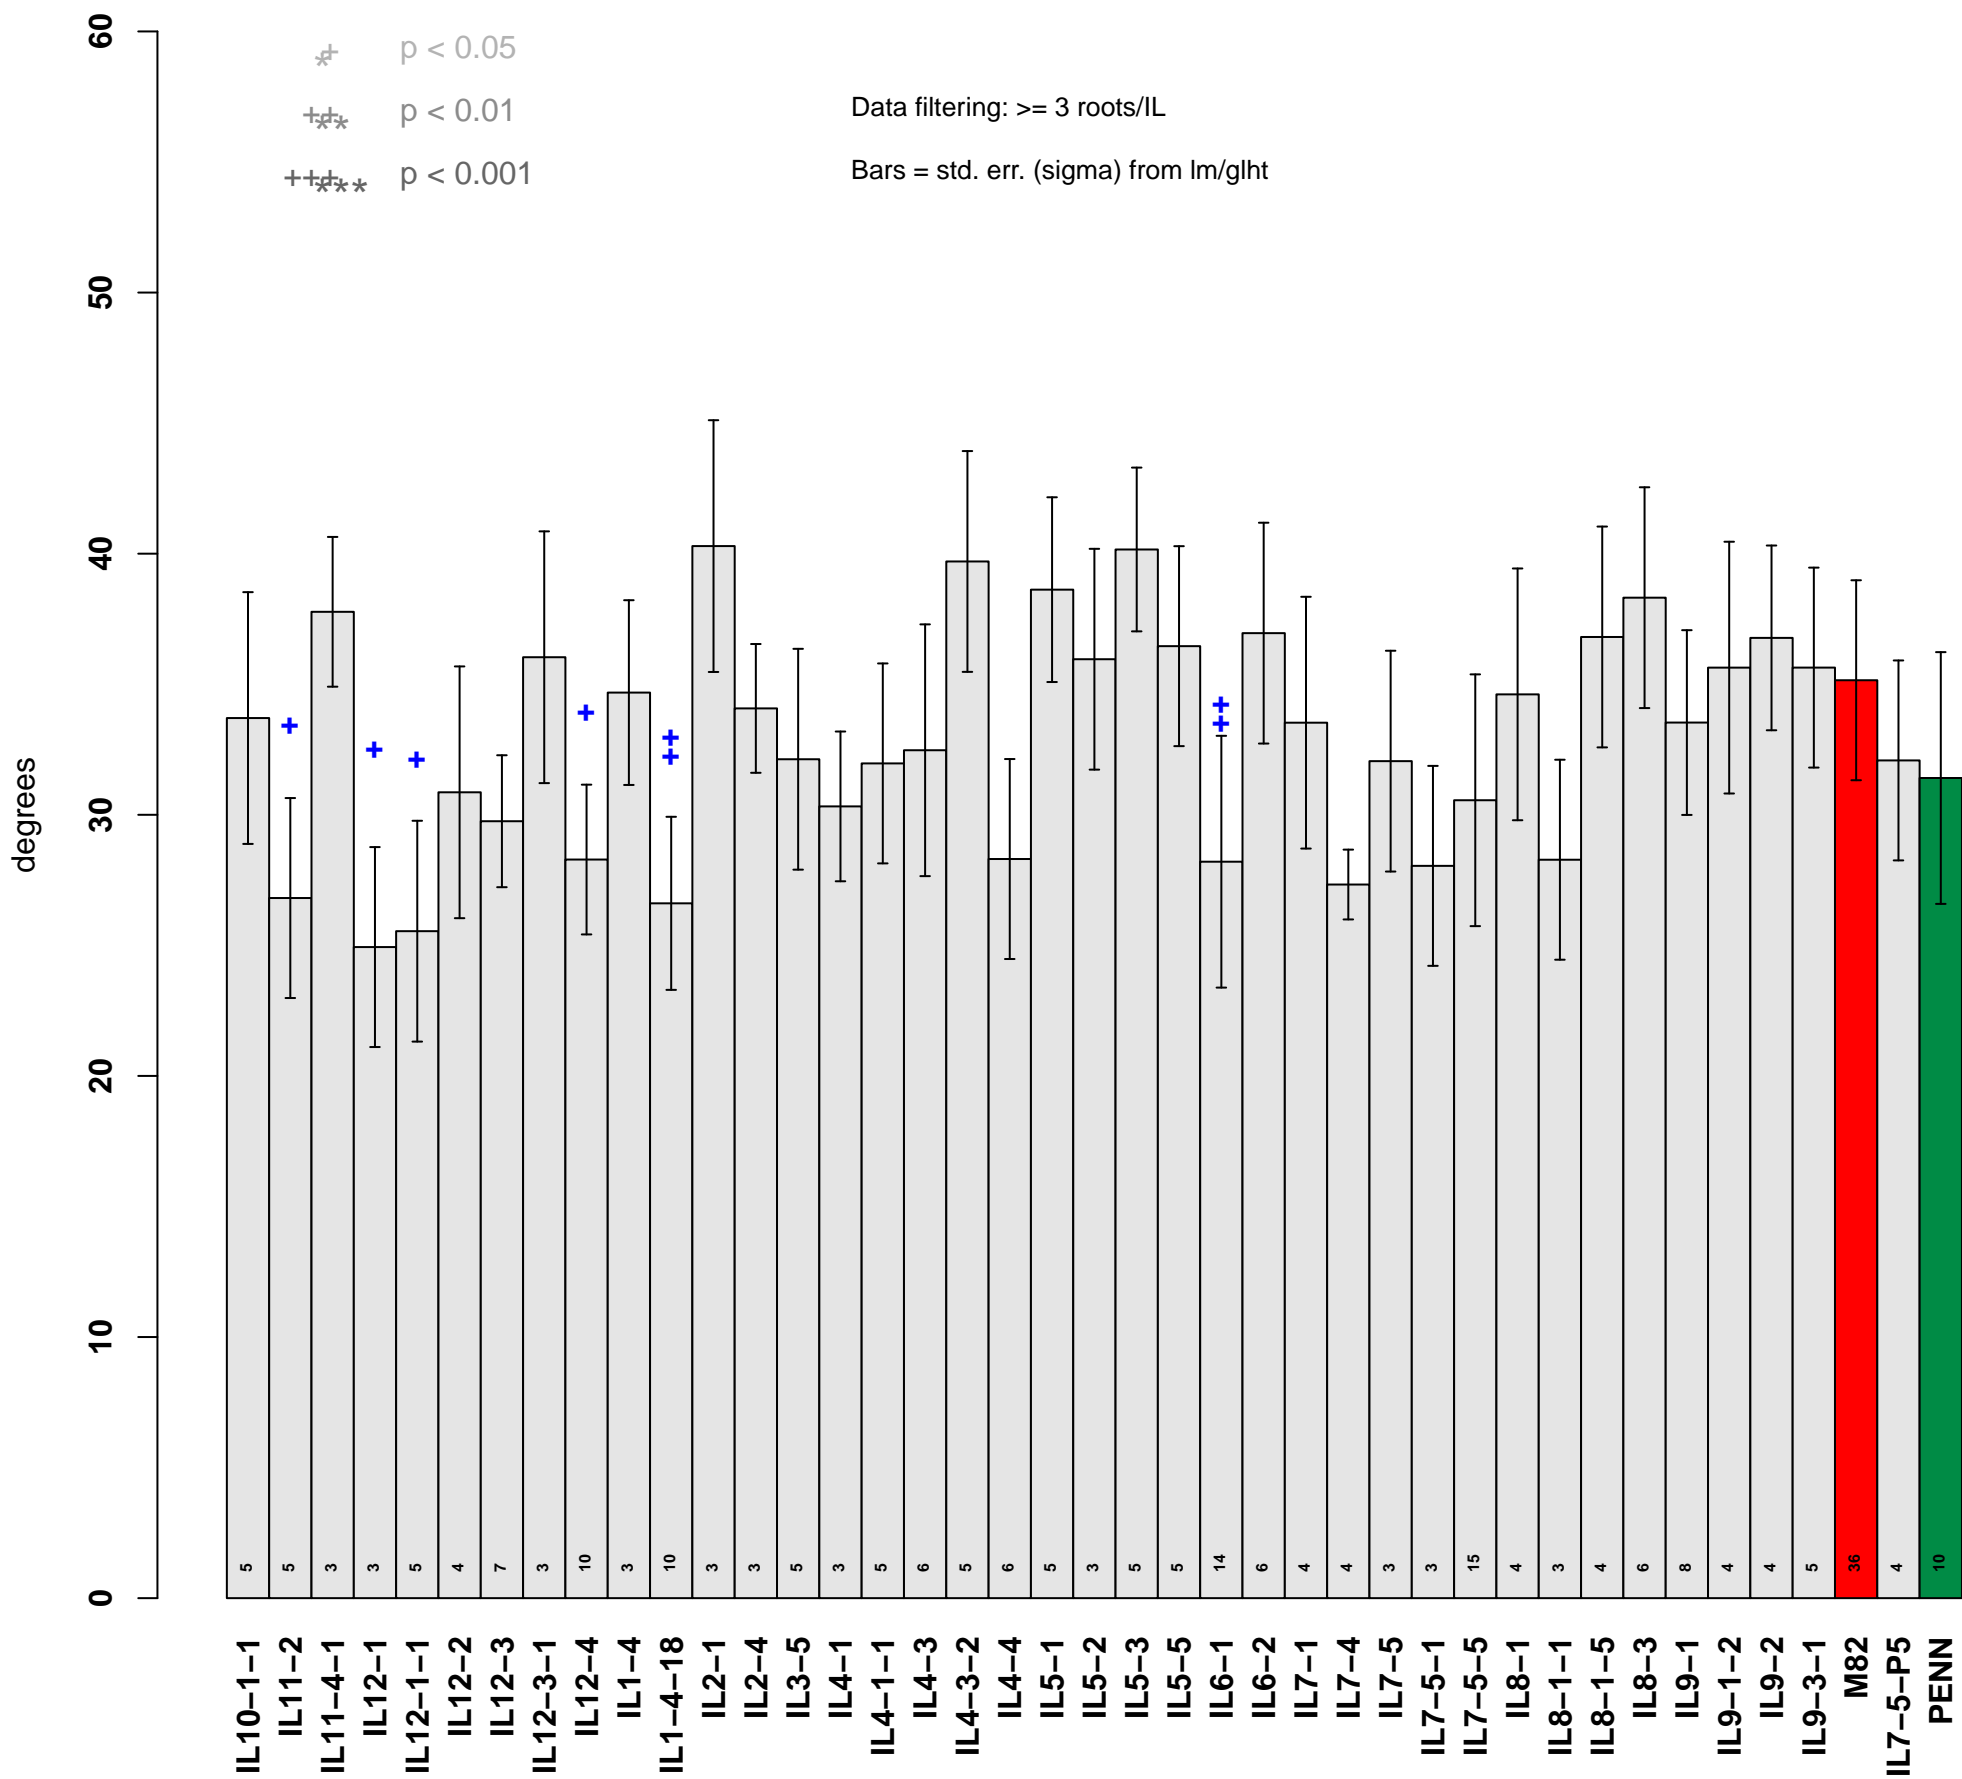

# Angle Thru T21

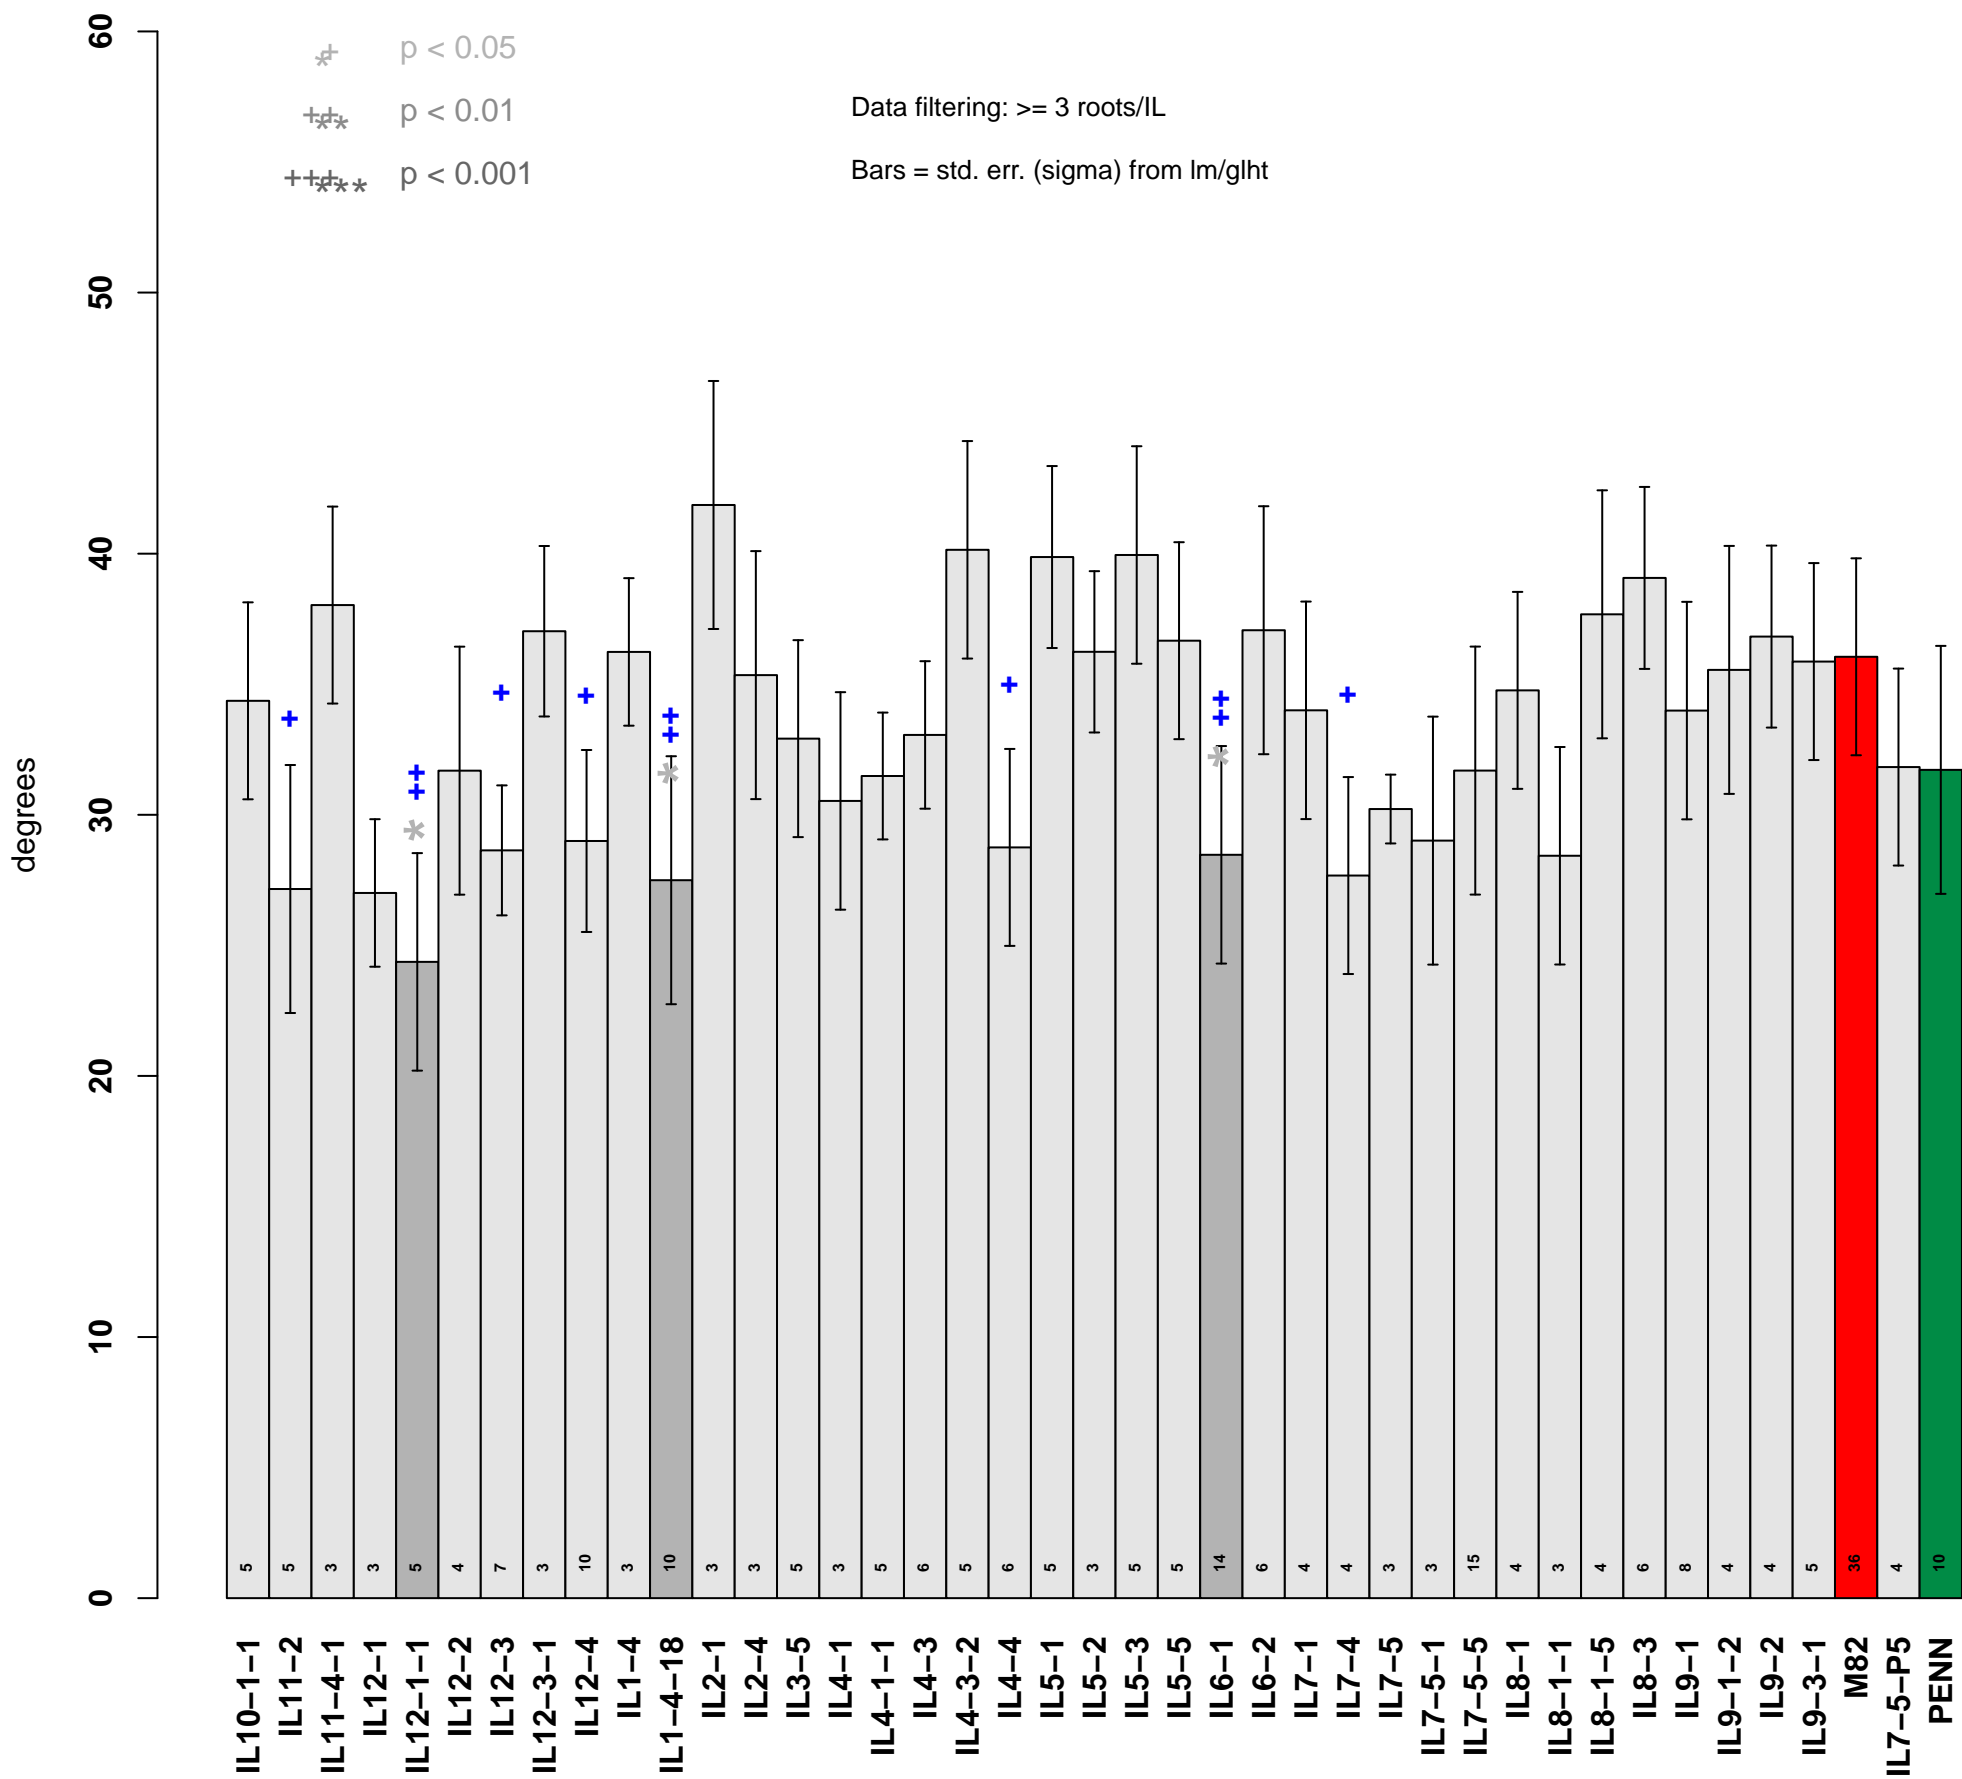

# Angle Thru T22

degrees

60  
50  
40  
30  
20  
10  
0

\*  $p < 0.05$   
+\*  $p < 0.01$   
++\*  $p < 0.001$

Data filtering:  $\geq 3$  roots/IL

Bars = std. err. (sigma) from lm/glht

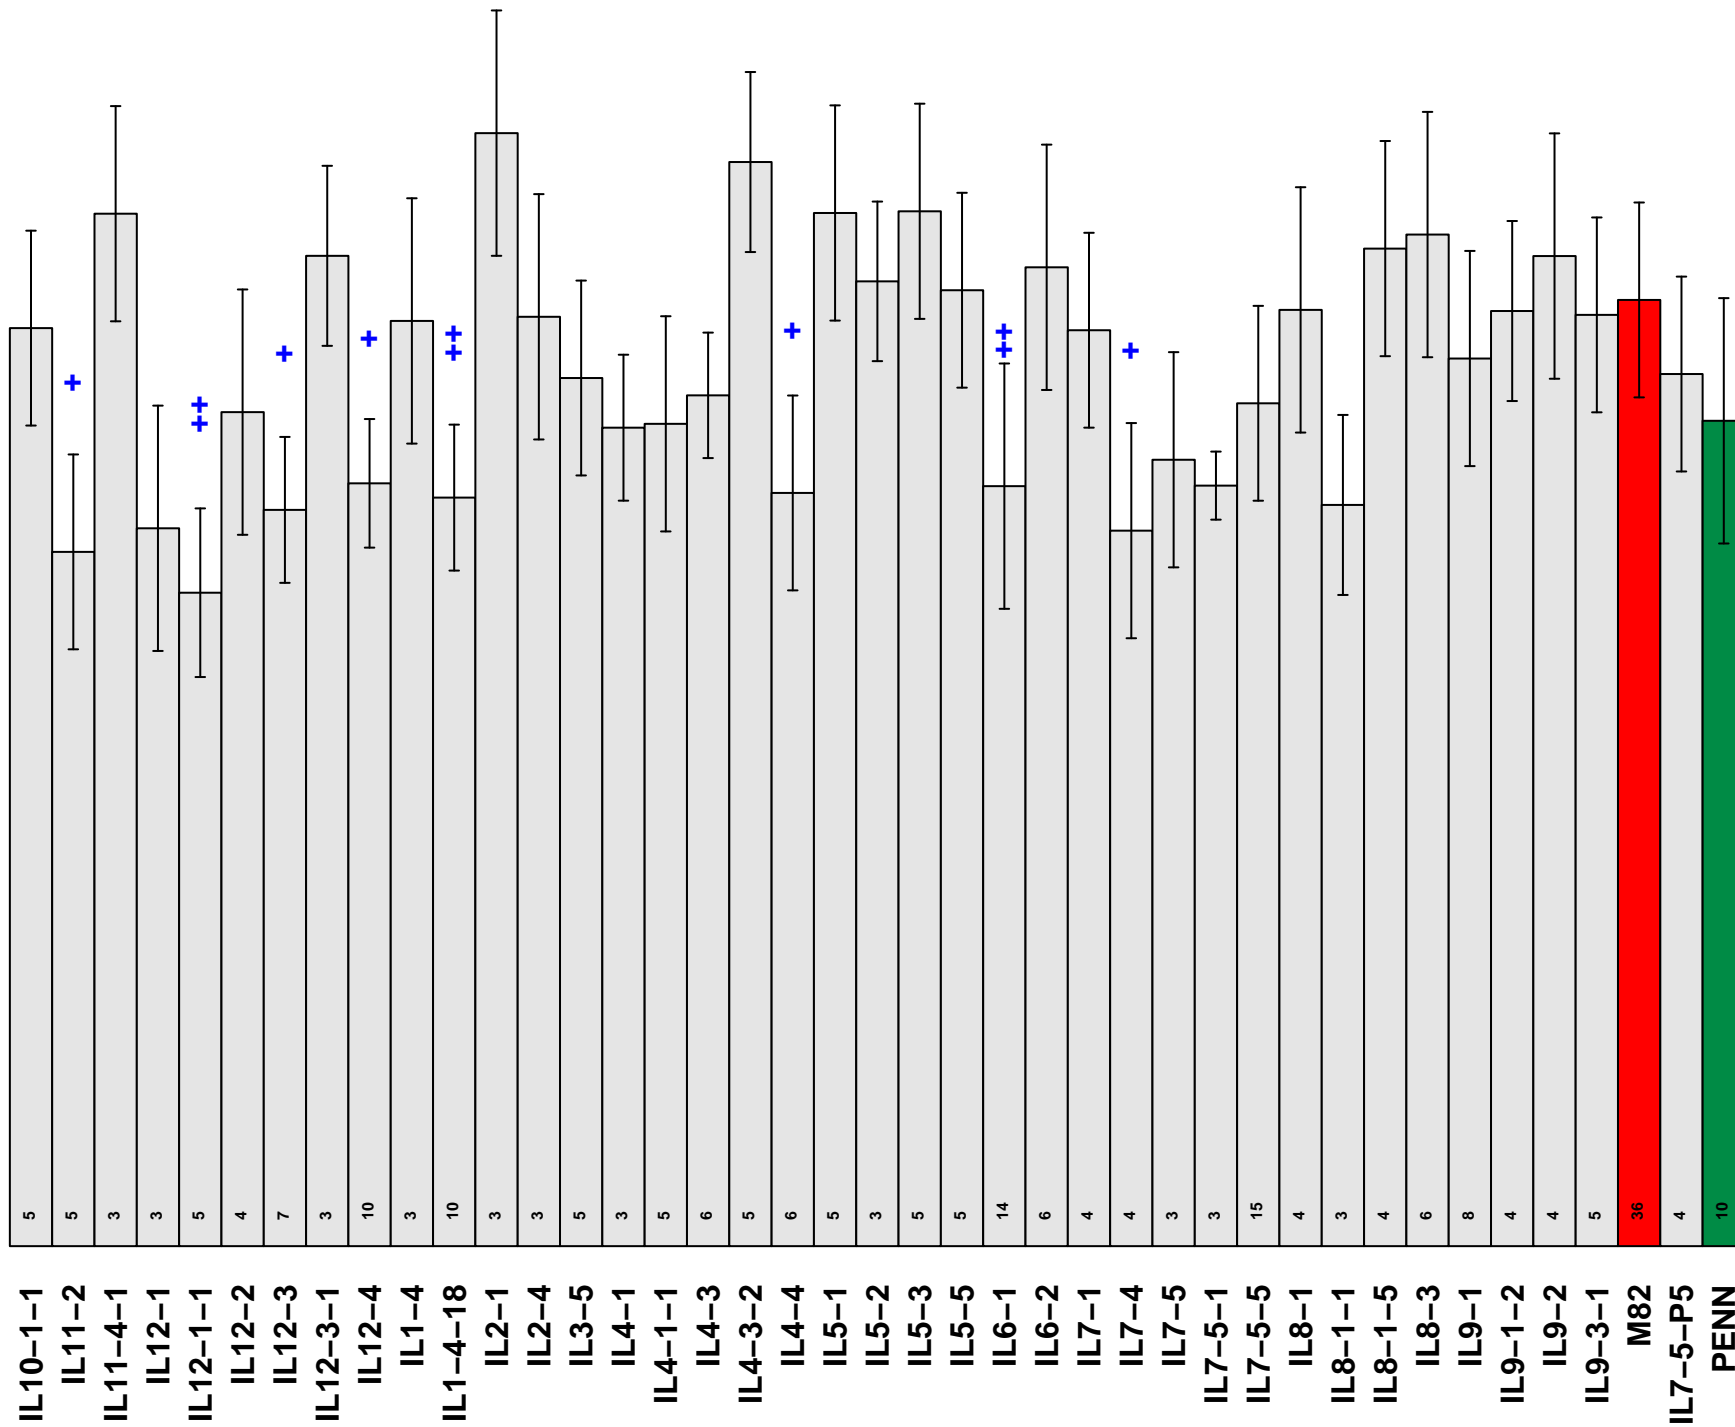

# Angle Thru T23

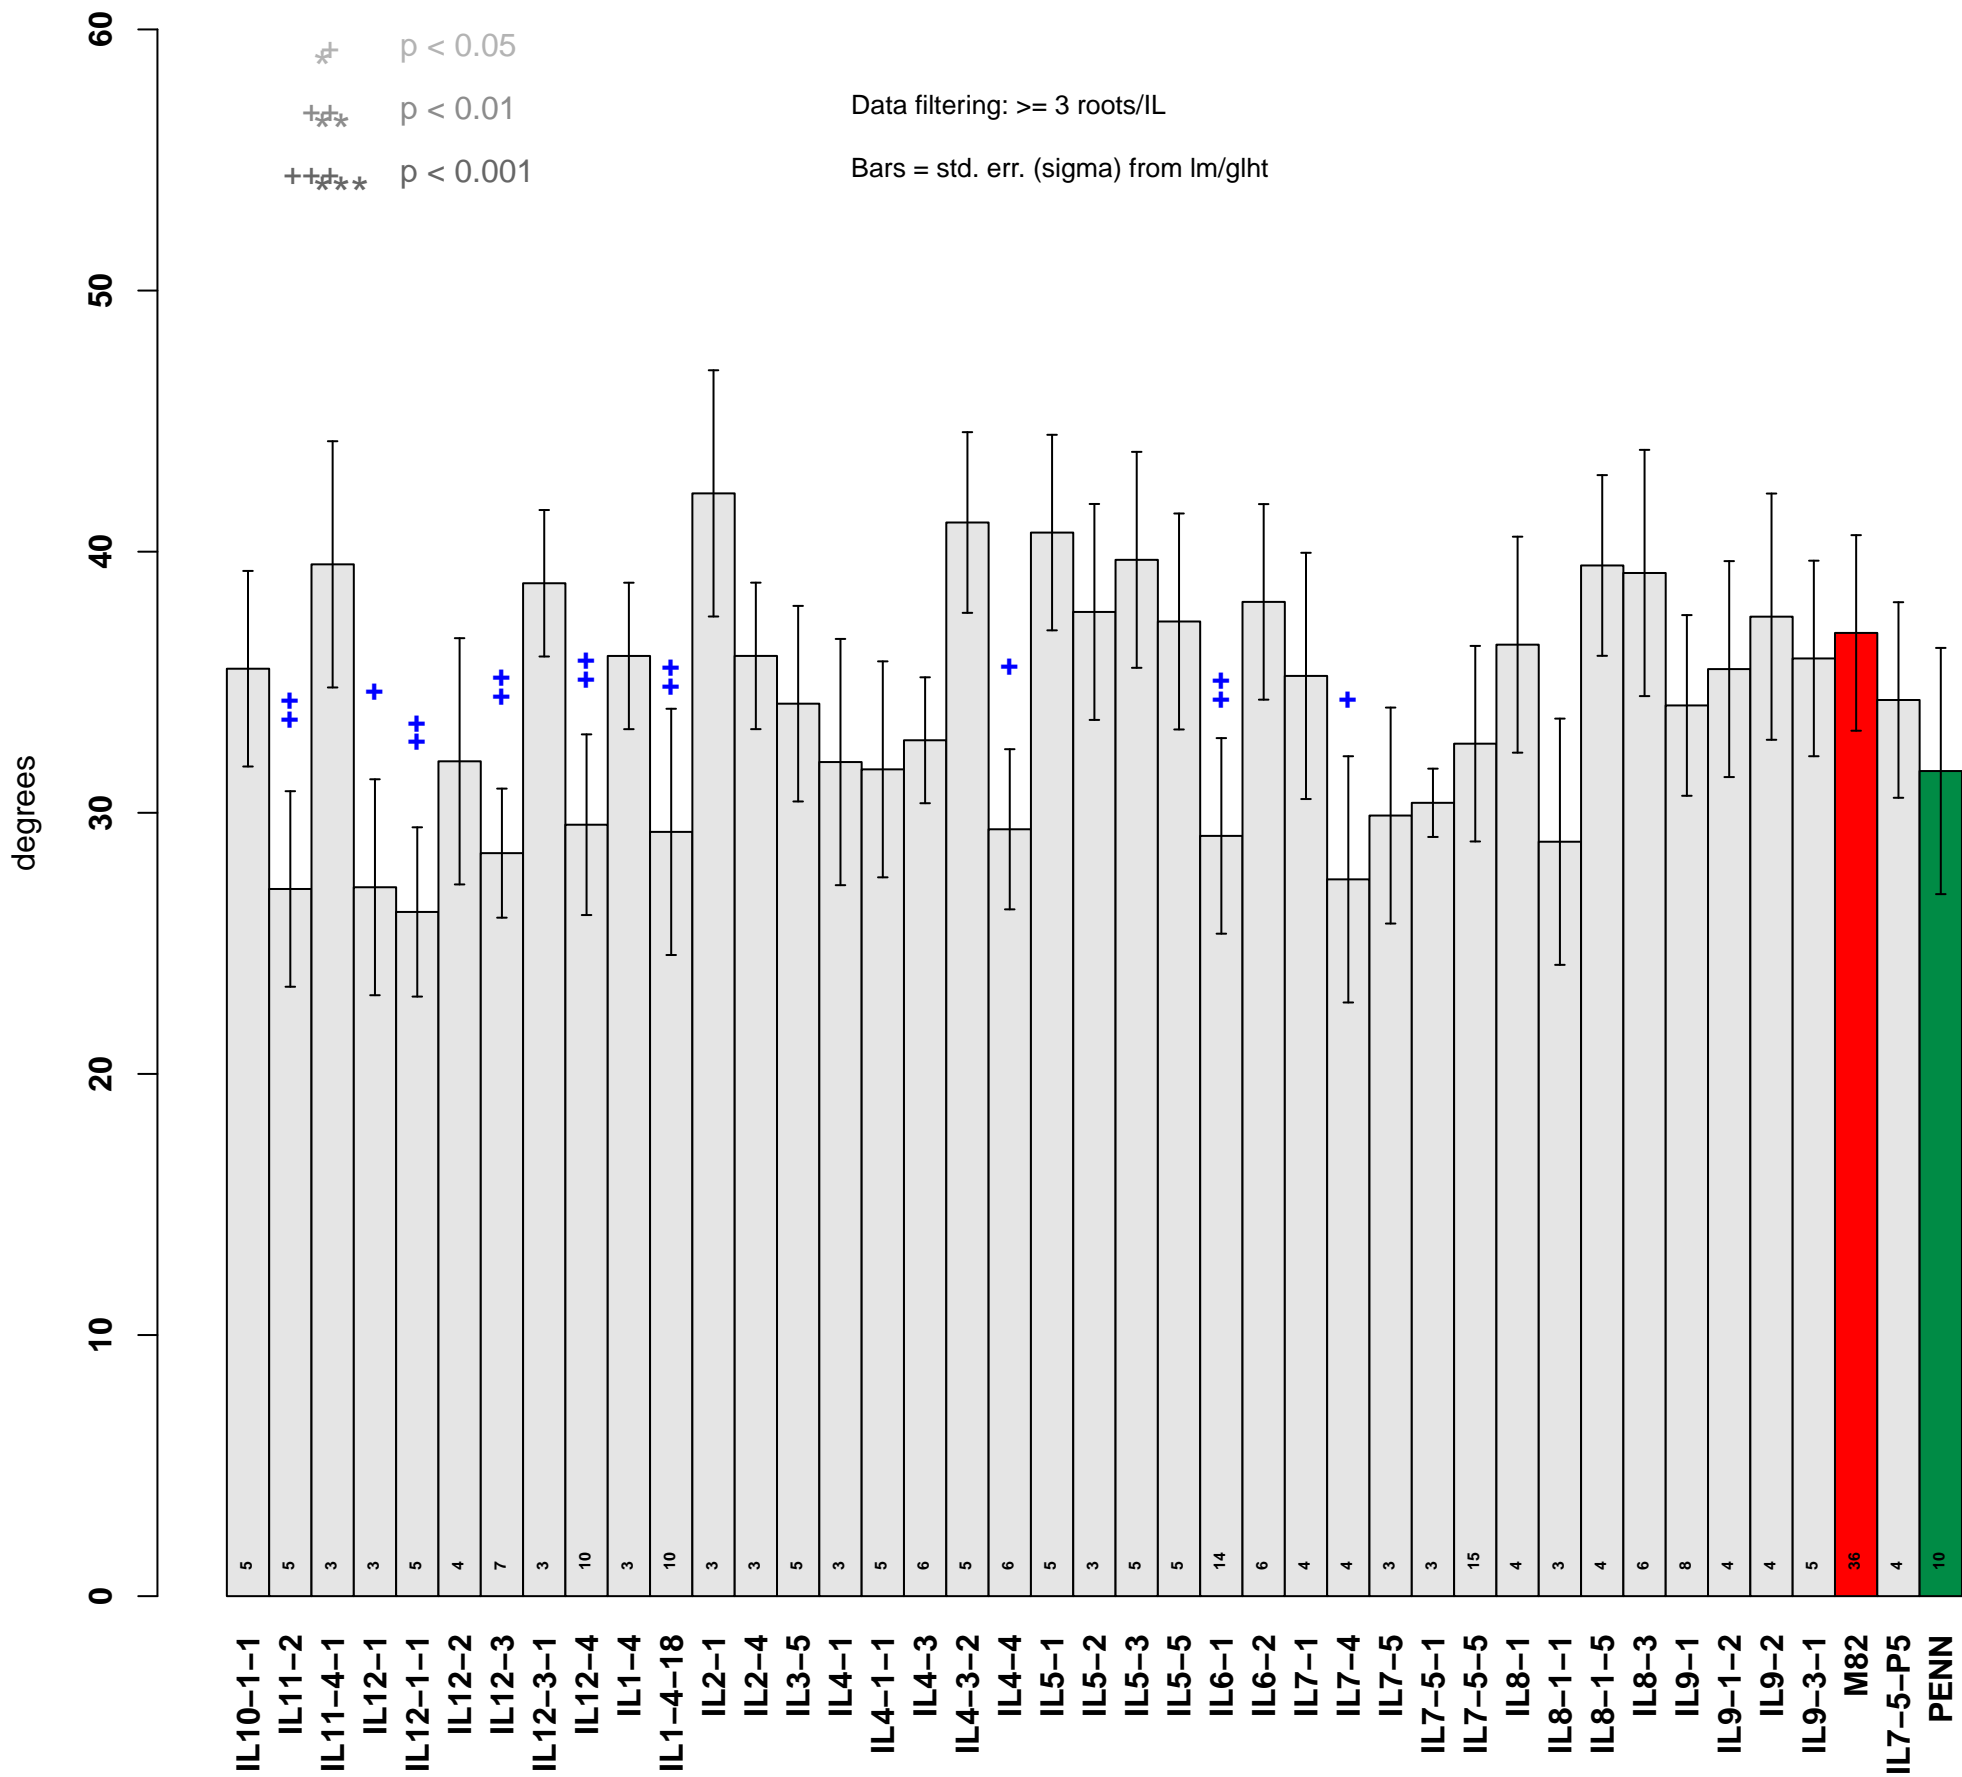



# Angle Thru T24

degrees

70  
60  
50  
40  
30  
20  
10  
0

\* p < 0.05  
+\* p < 0.01  
++\* p < 0.001

Data filtering: >= 3 roots/IL

Bars = std. err. (sigma) from lm/glht

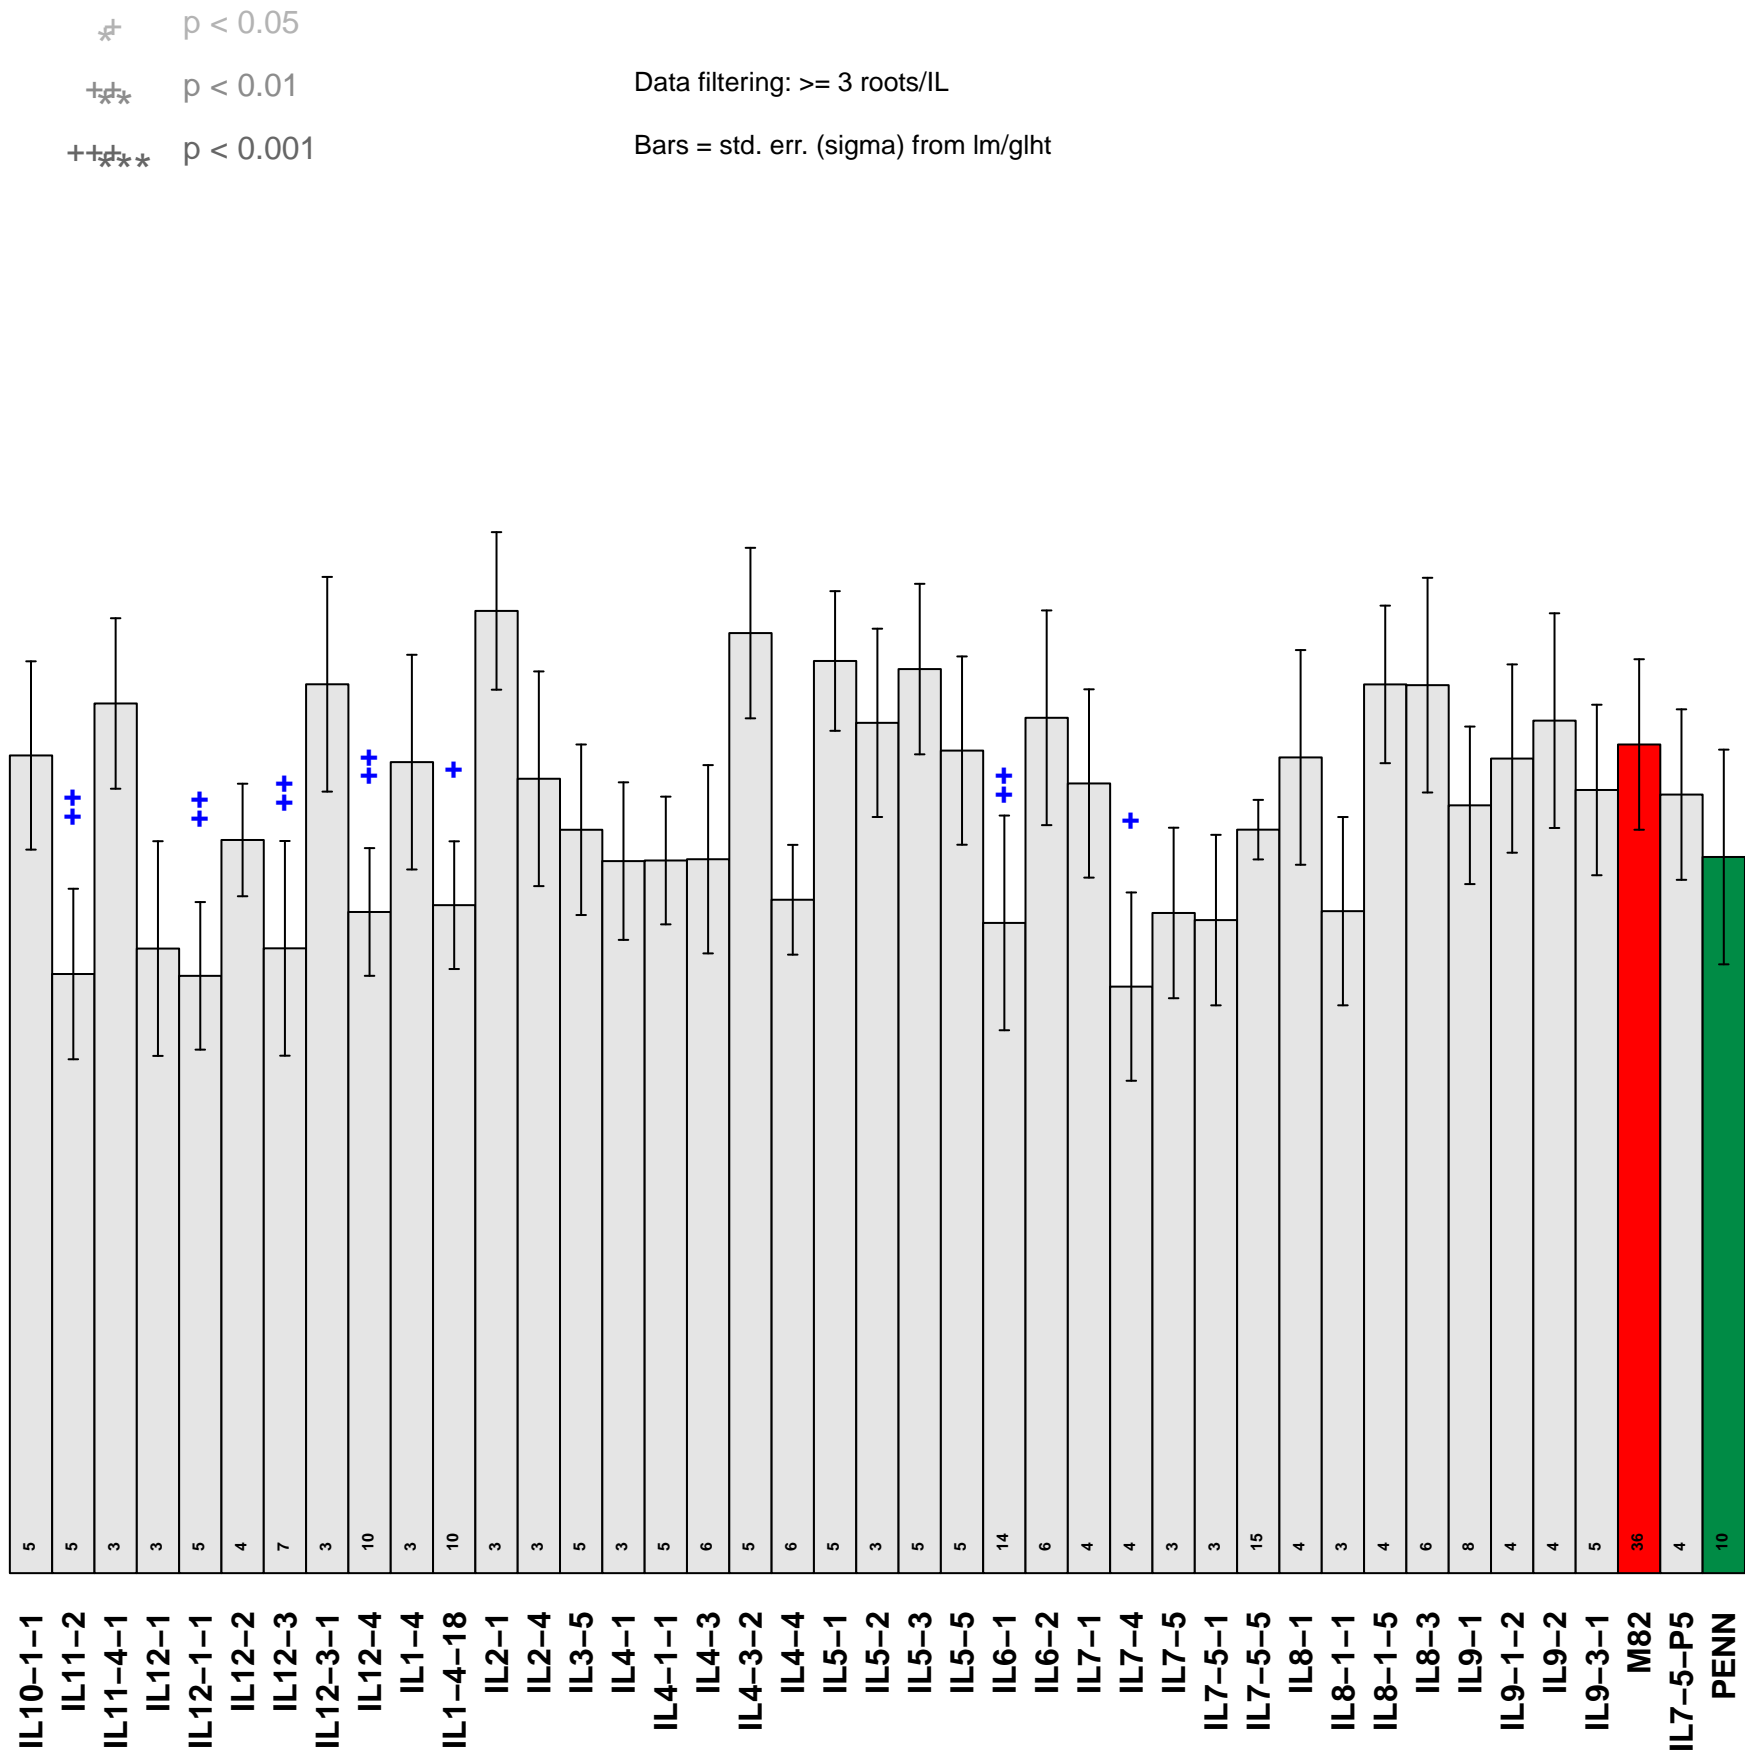

# Angle Thru T25

degrees

70  
60  
50  
40  
30  
20  
10  
0

\* p < 0.05  
+\* p < 0.01  
++\* p < 0.001

Data filtering: >= 3 roots/IL

Bars = std. err. (sigma) from lm/glht

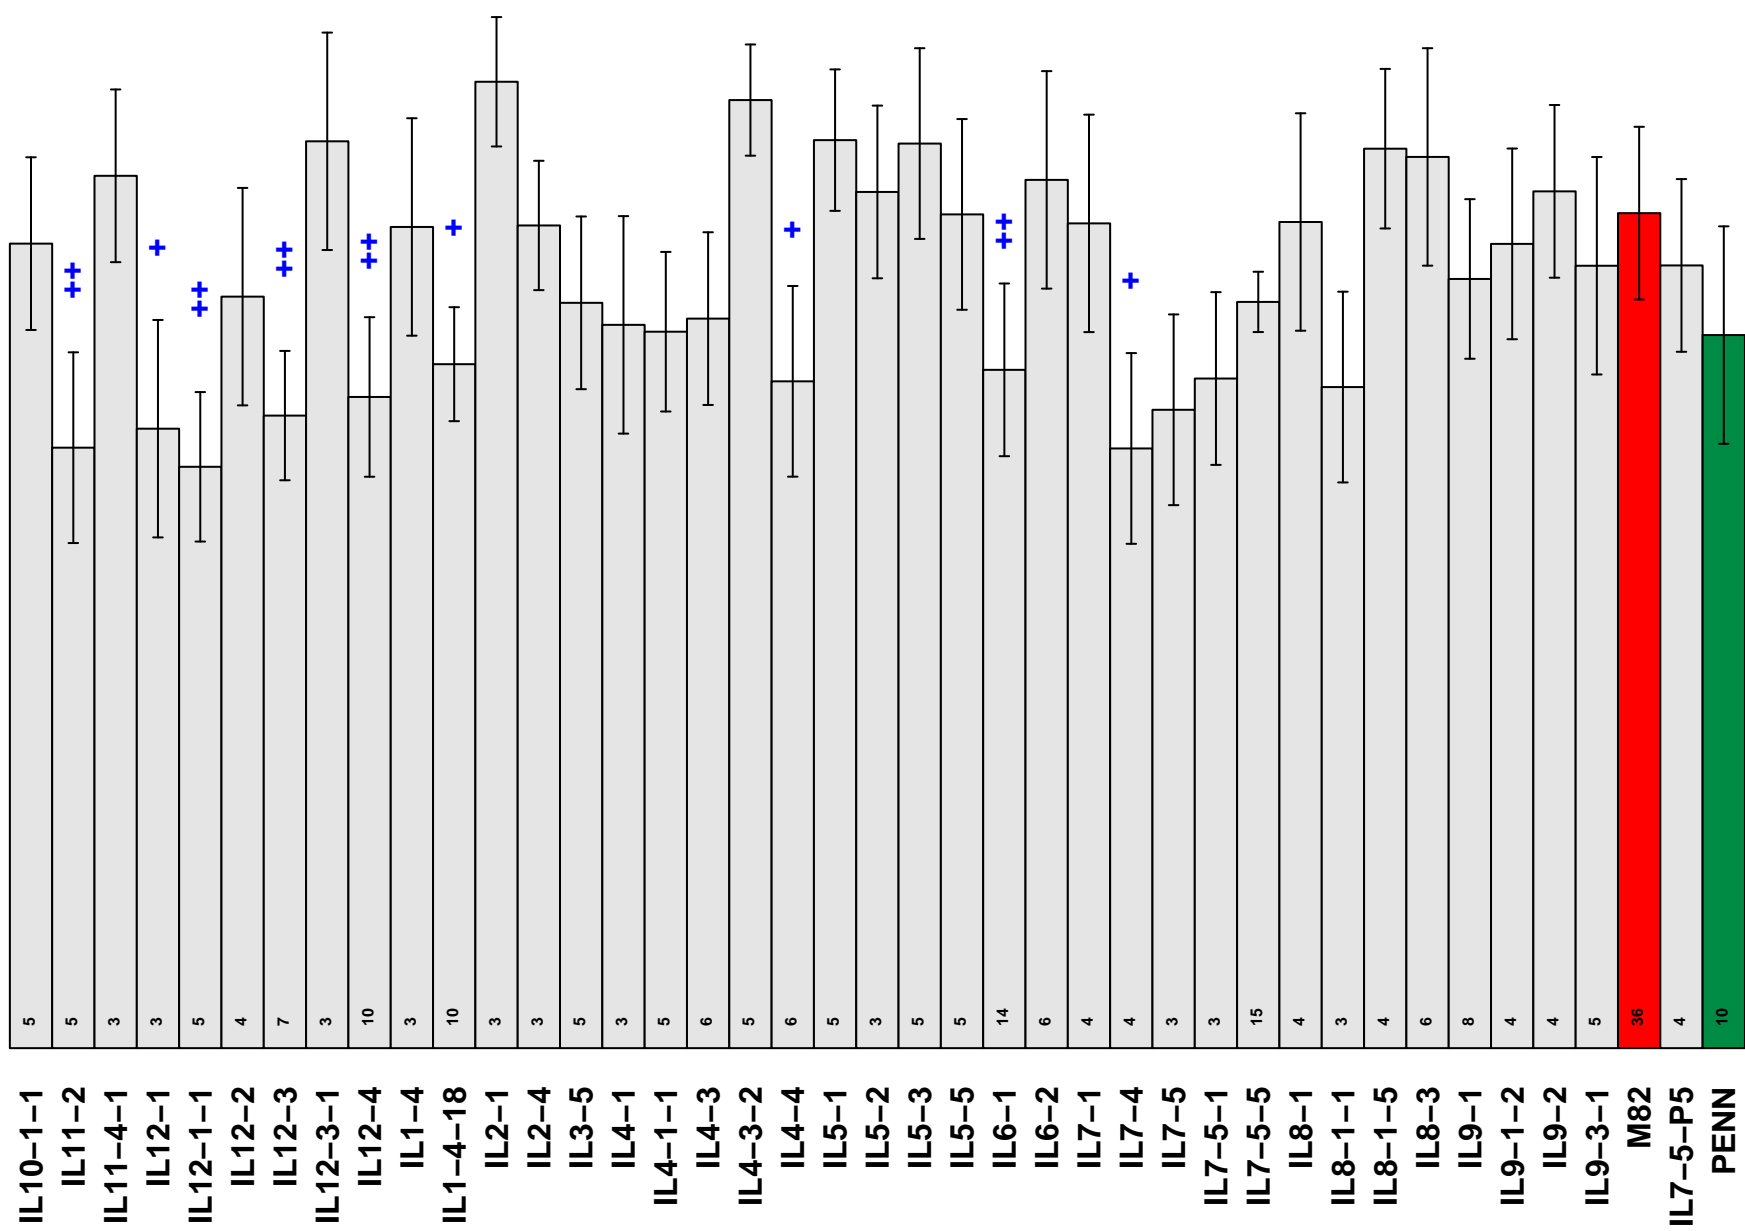

# Angle Thru T26

degrees

70  
60  
50  
40  
30  
20  
10  
0

\* p < 0.05  
+\* p < 0.01  
++\* p < 0.001

Data filtering: >= 3 roots/IL

Bars = std. err. (sigma) from lm/glht

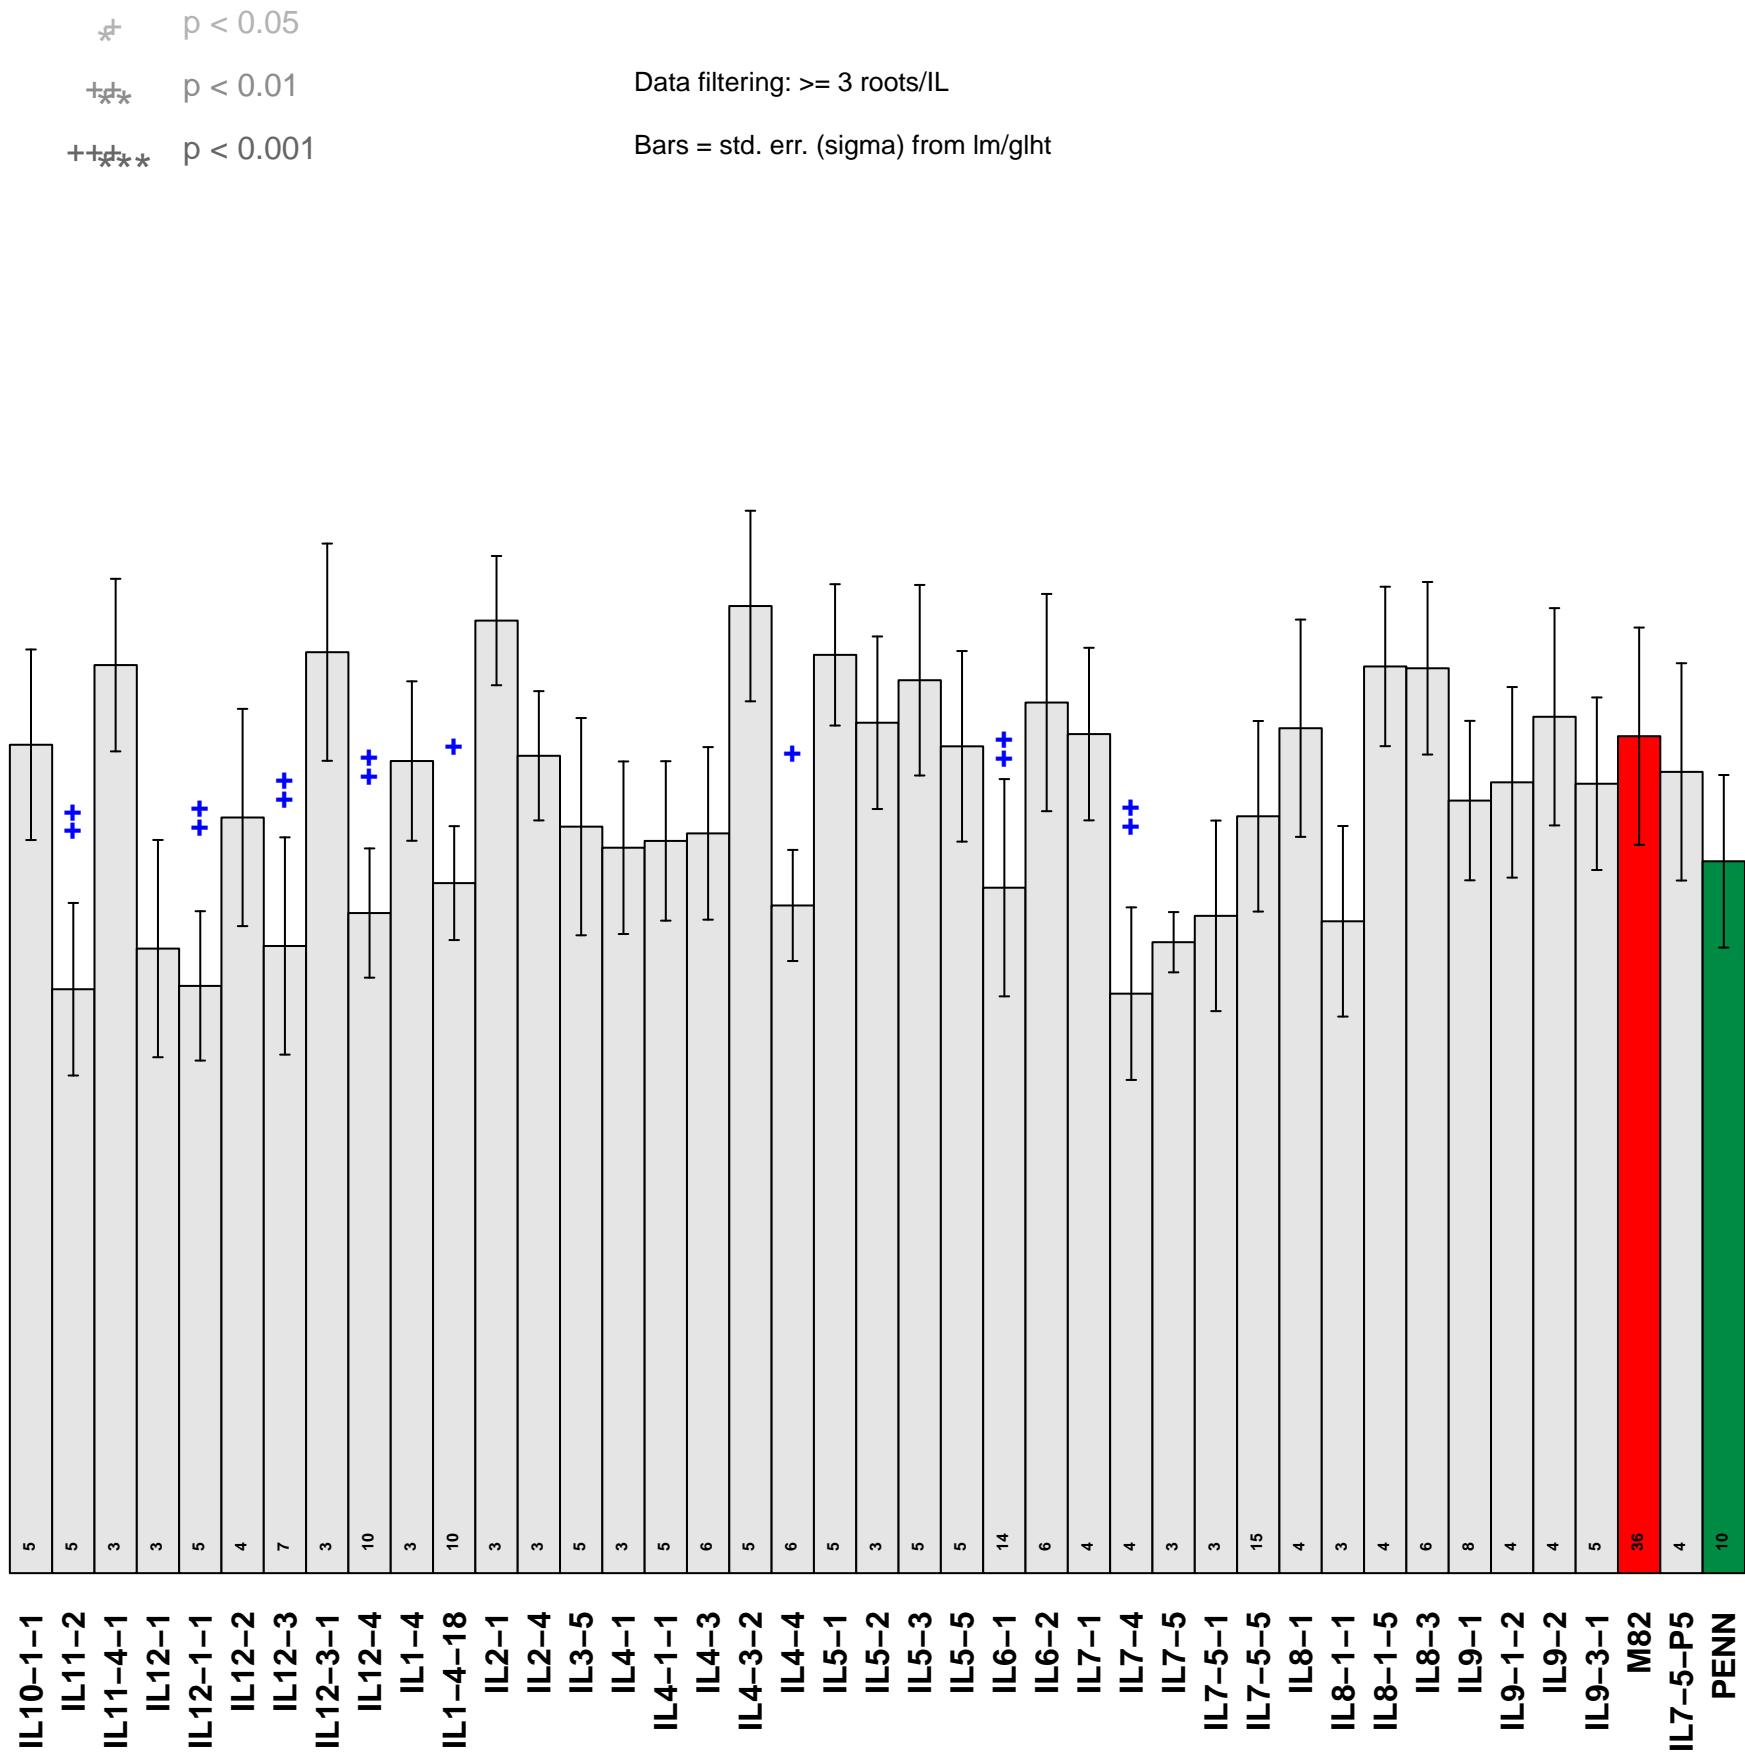

# Angle Thru T27

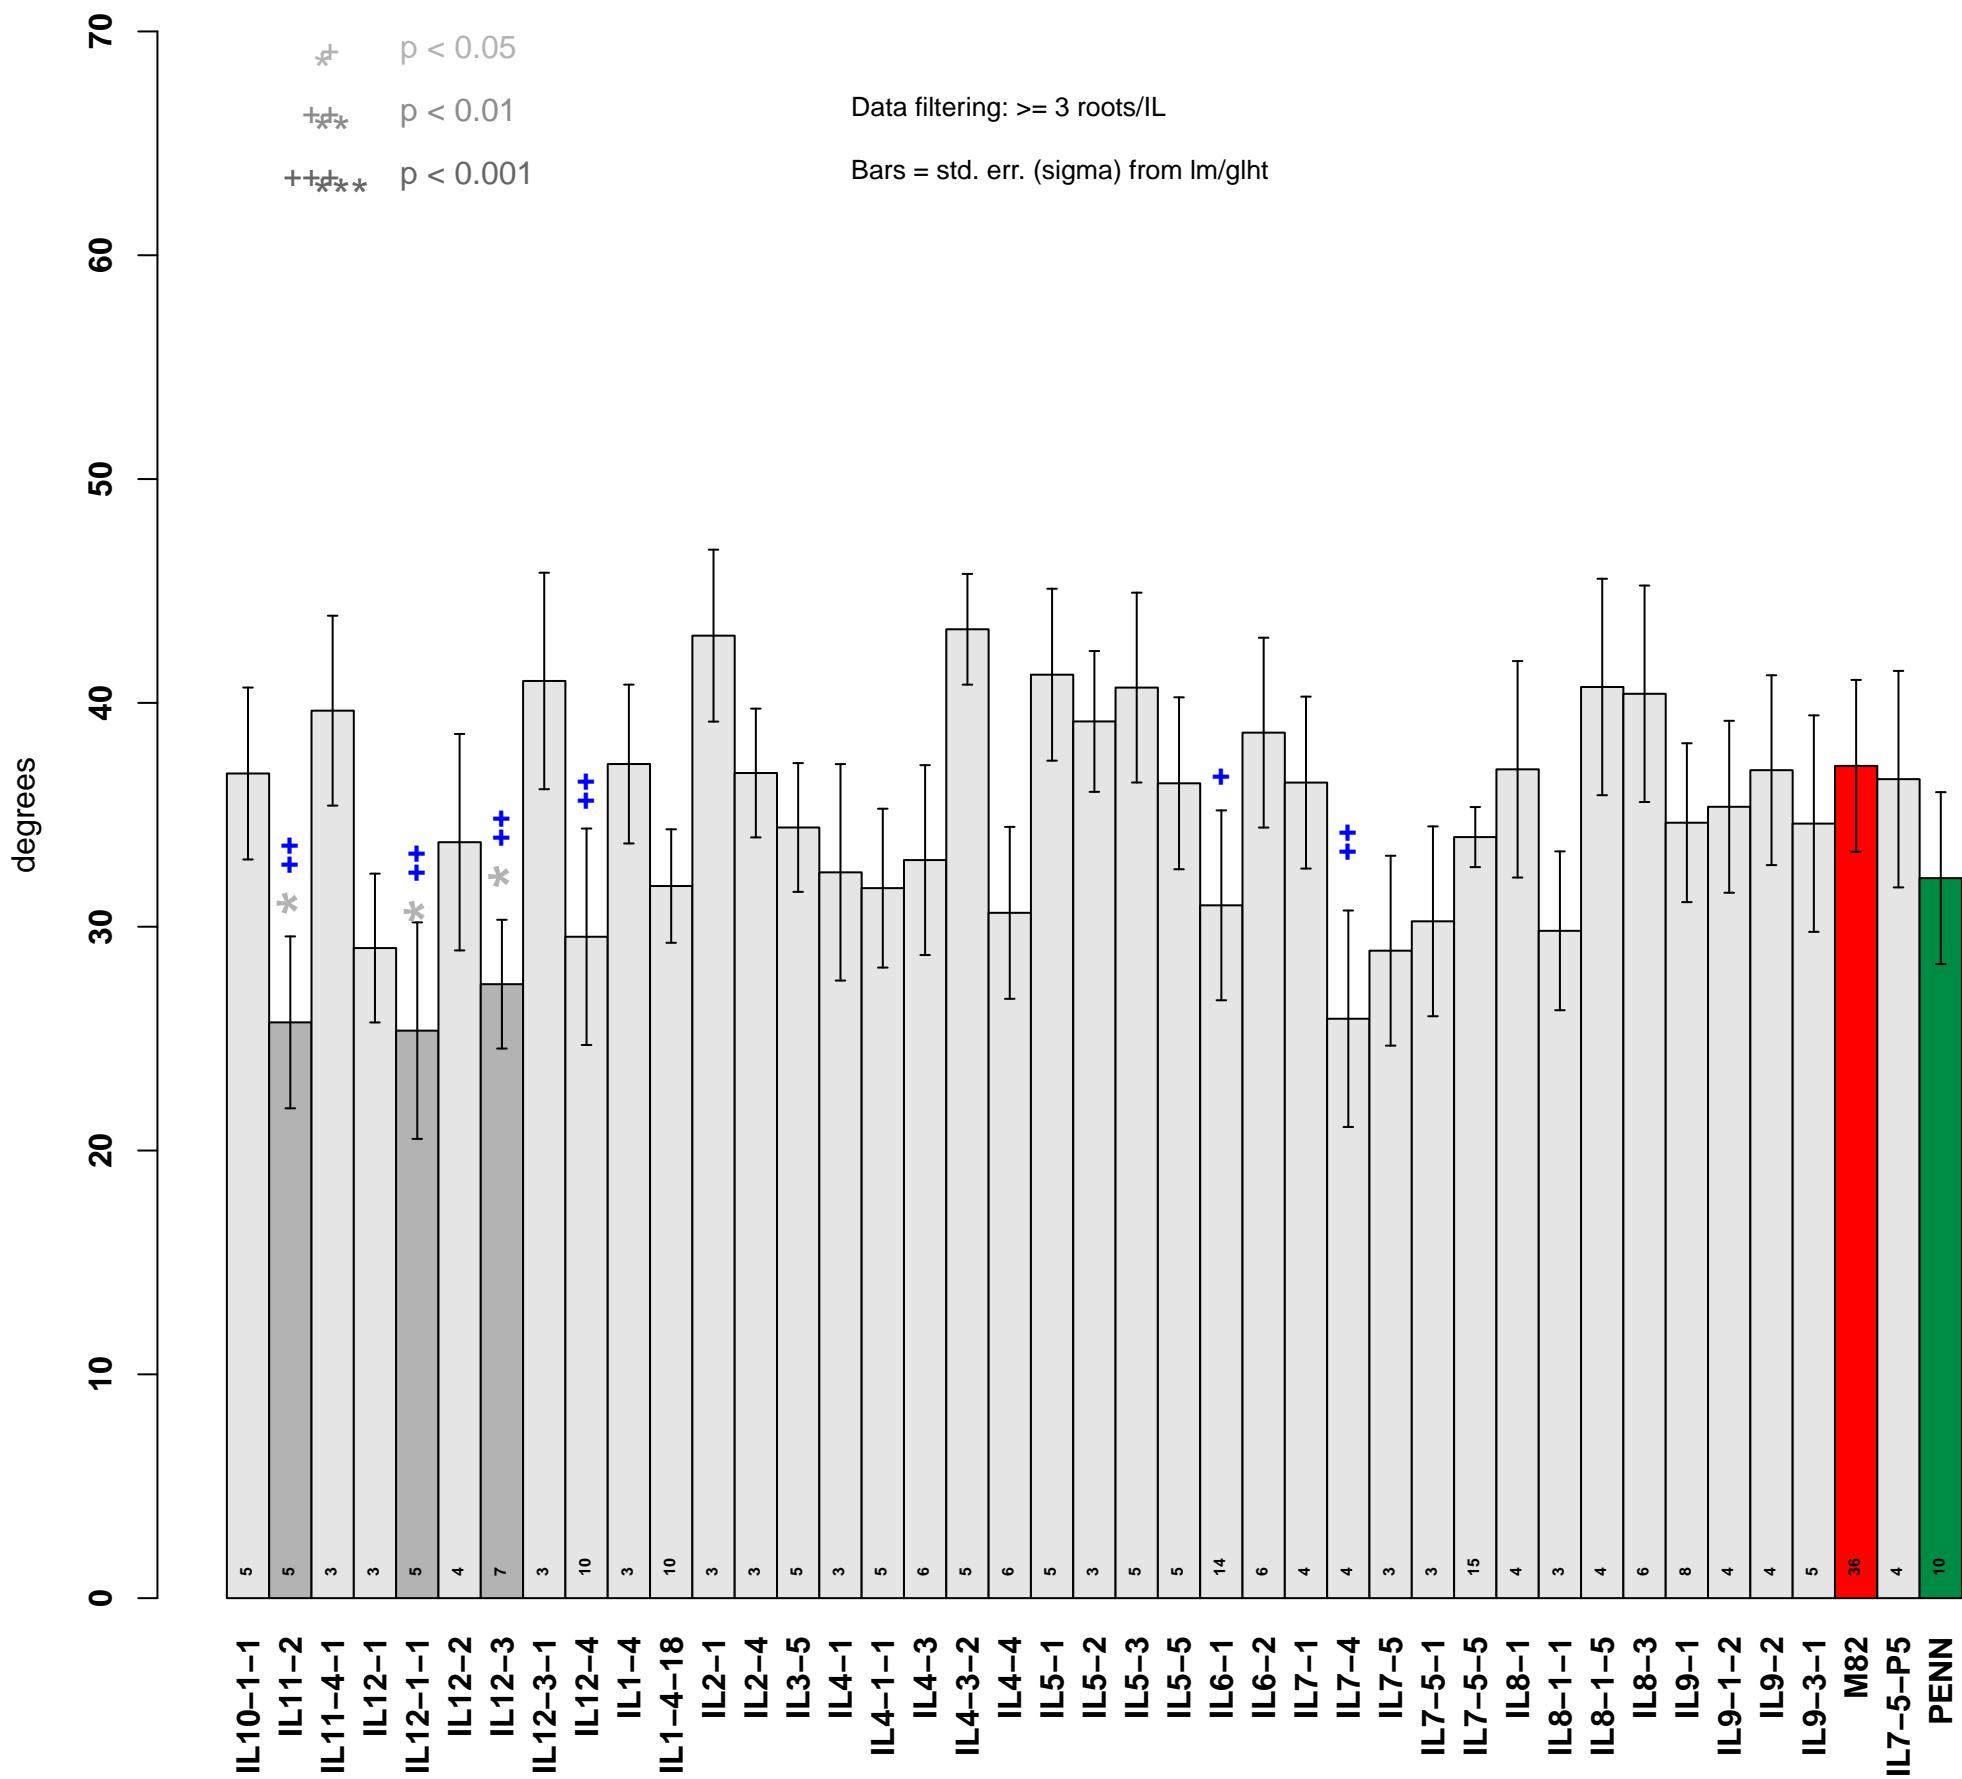

# Angle Thru T28

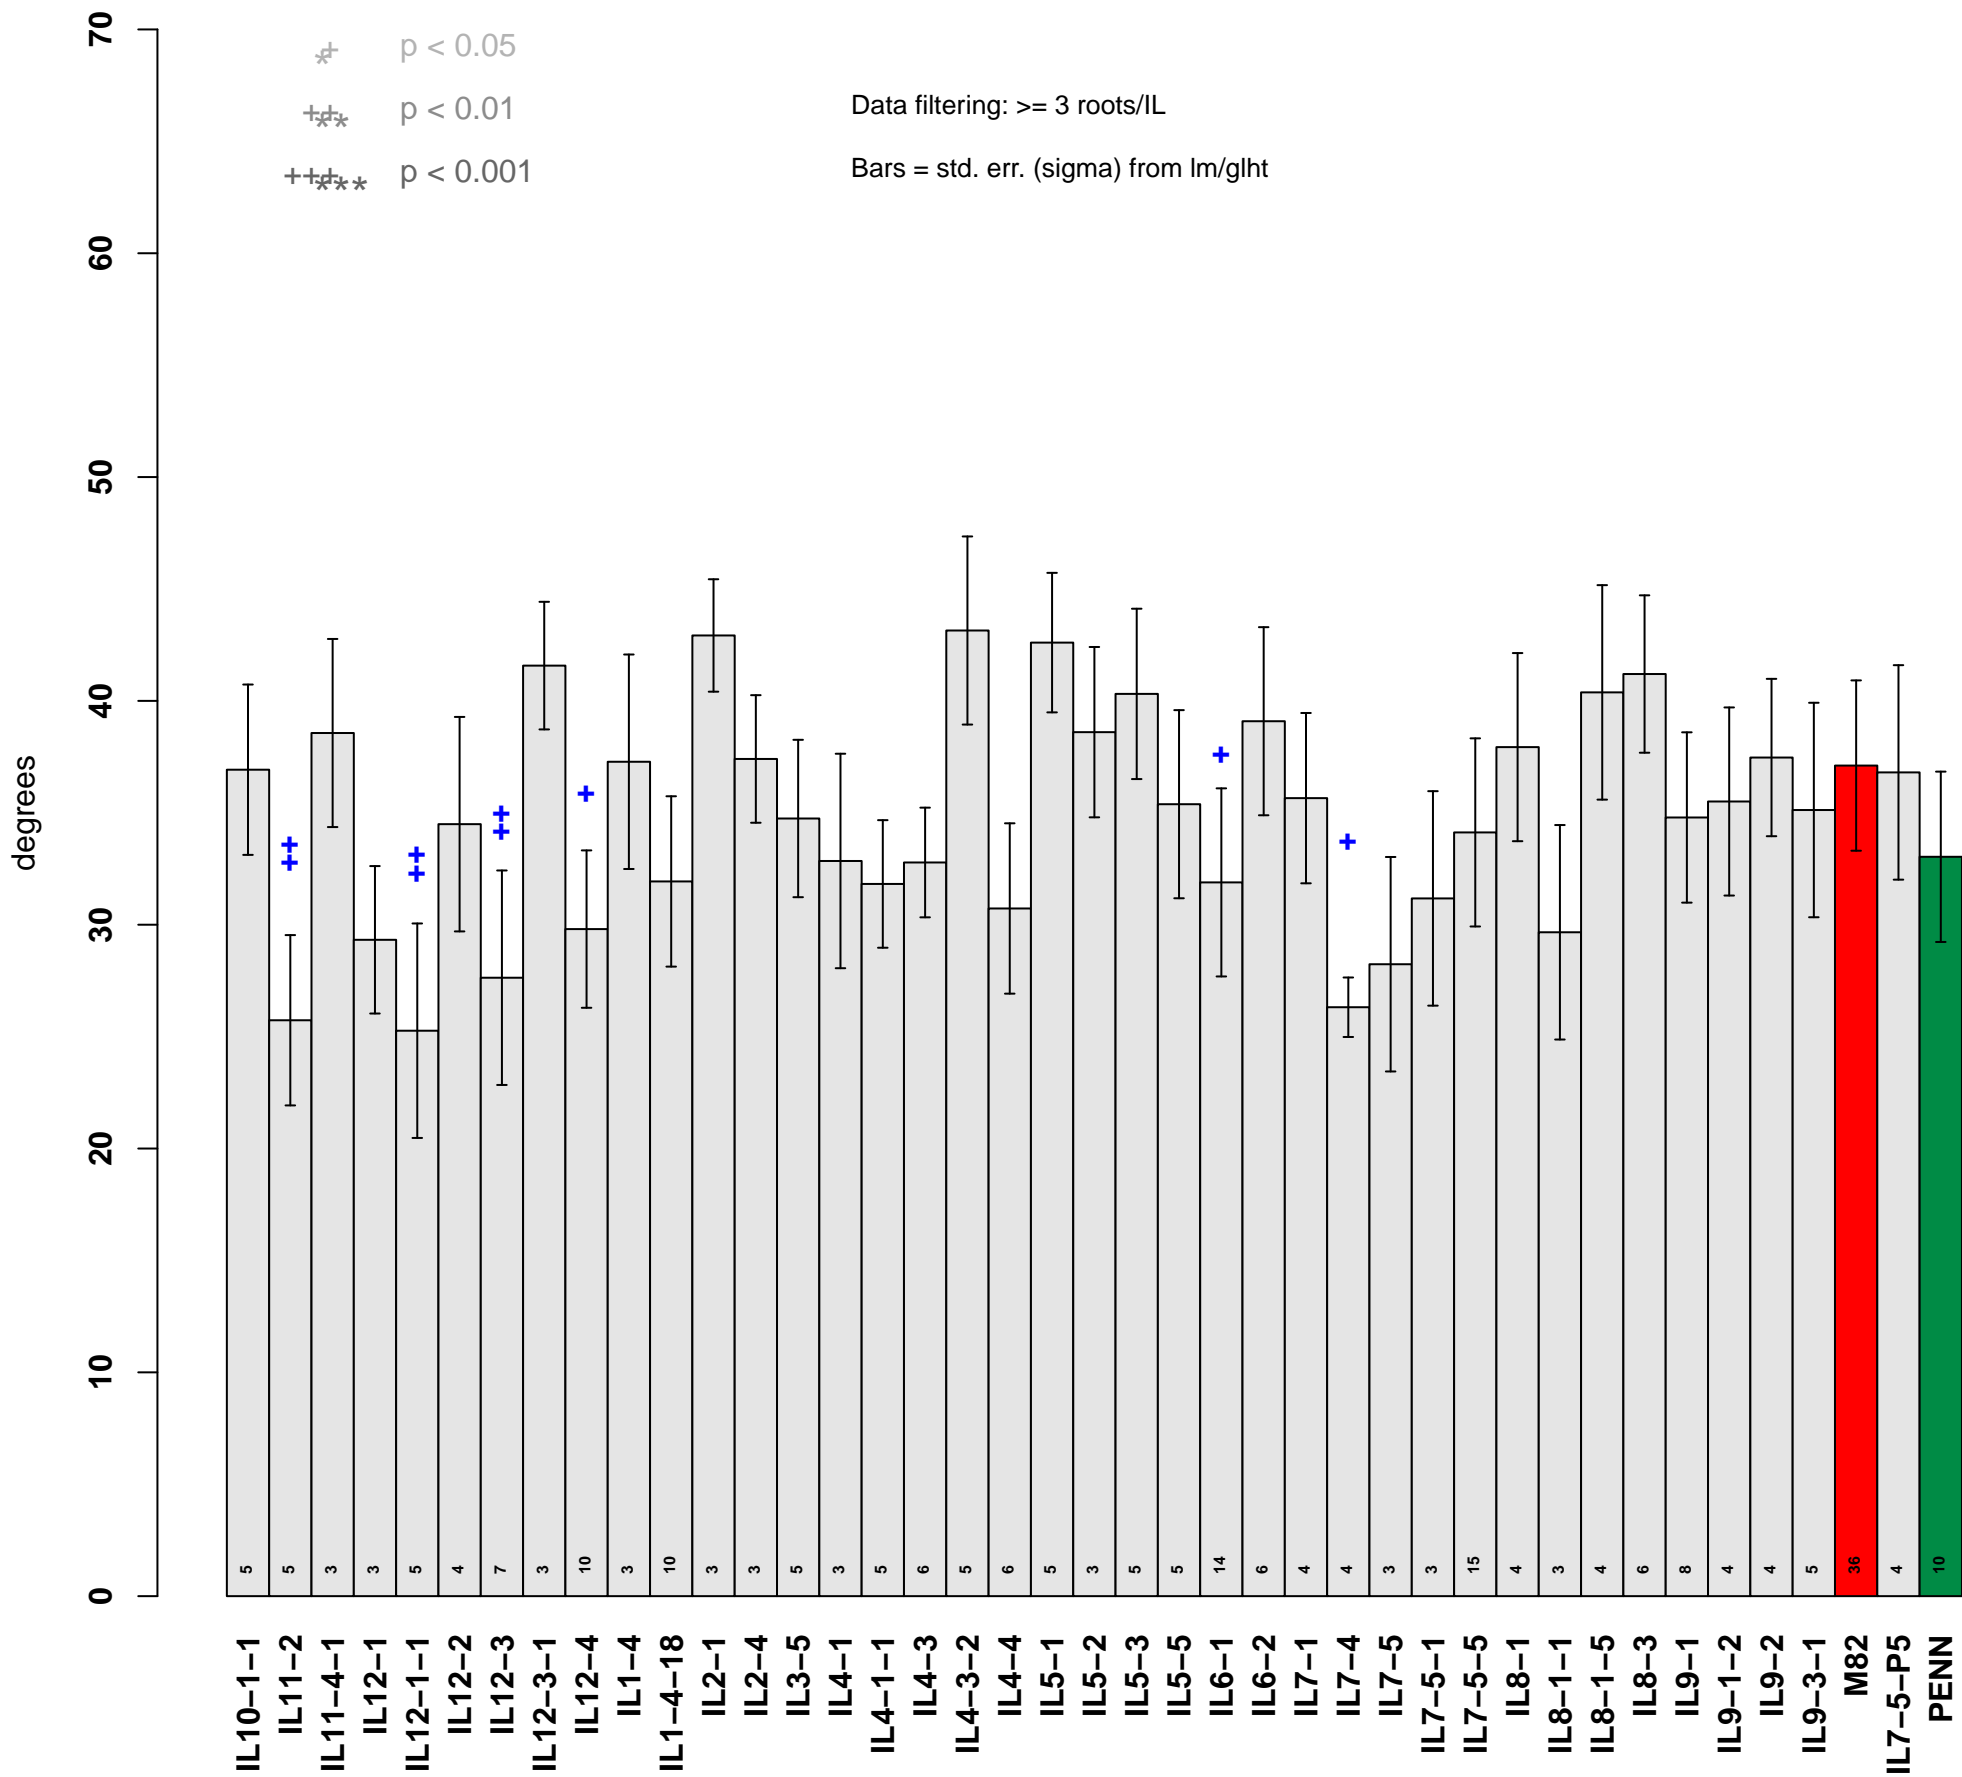

# Angle Thru T29

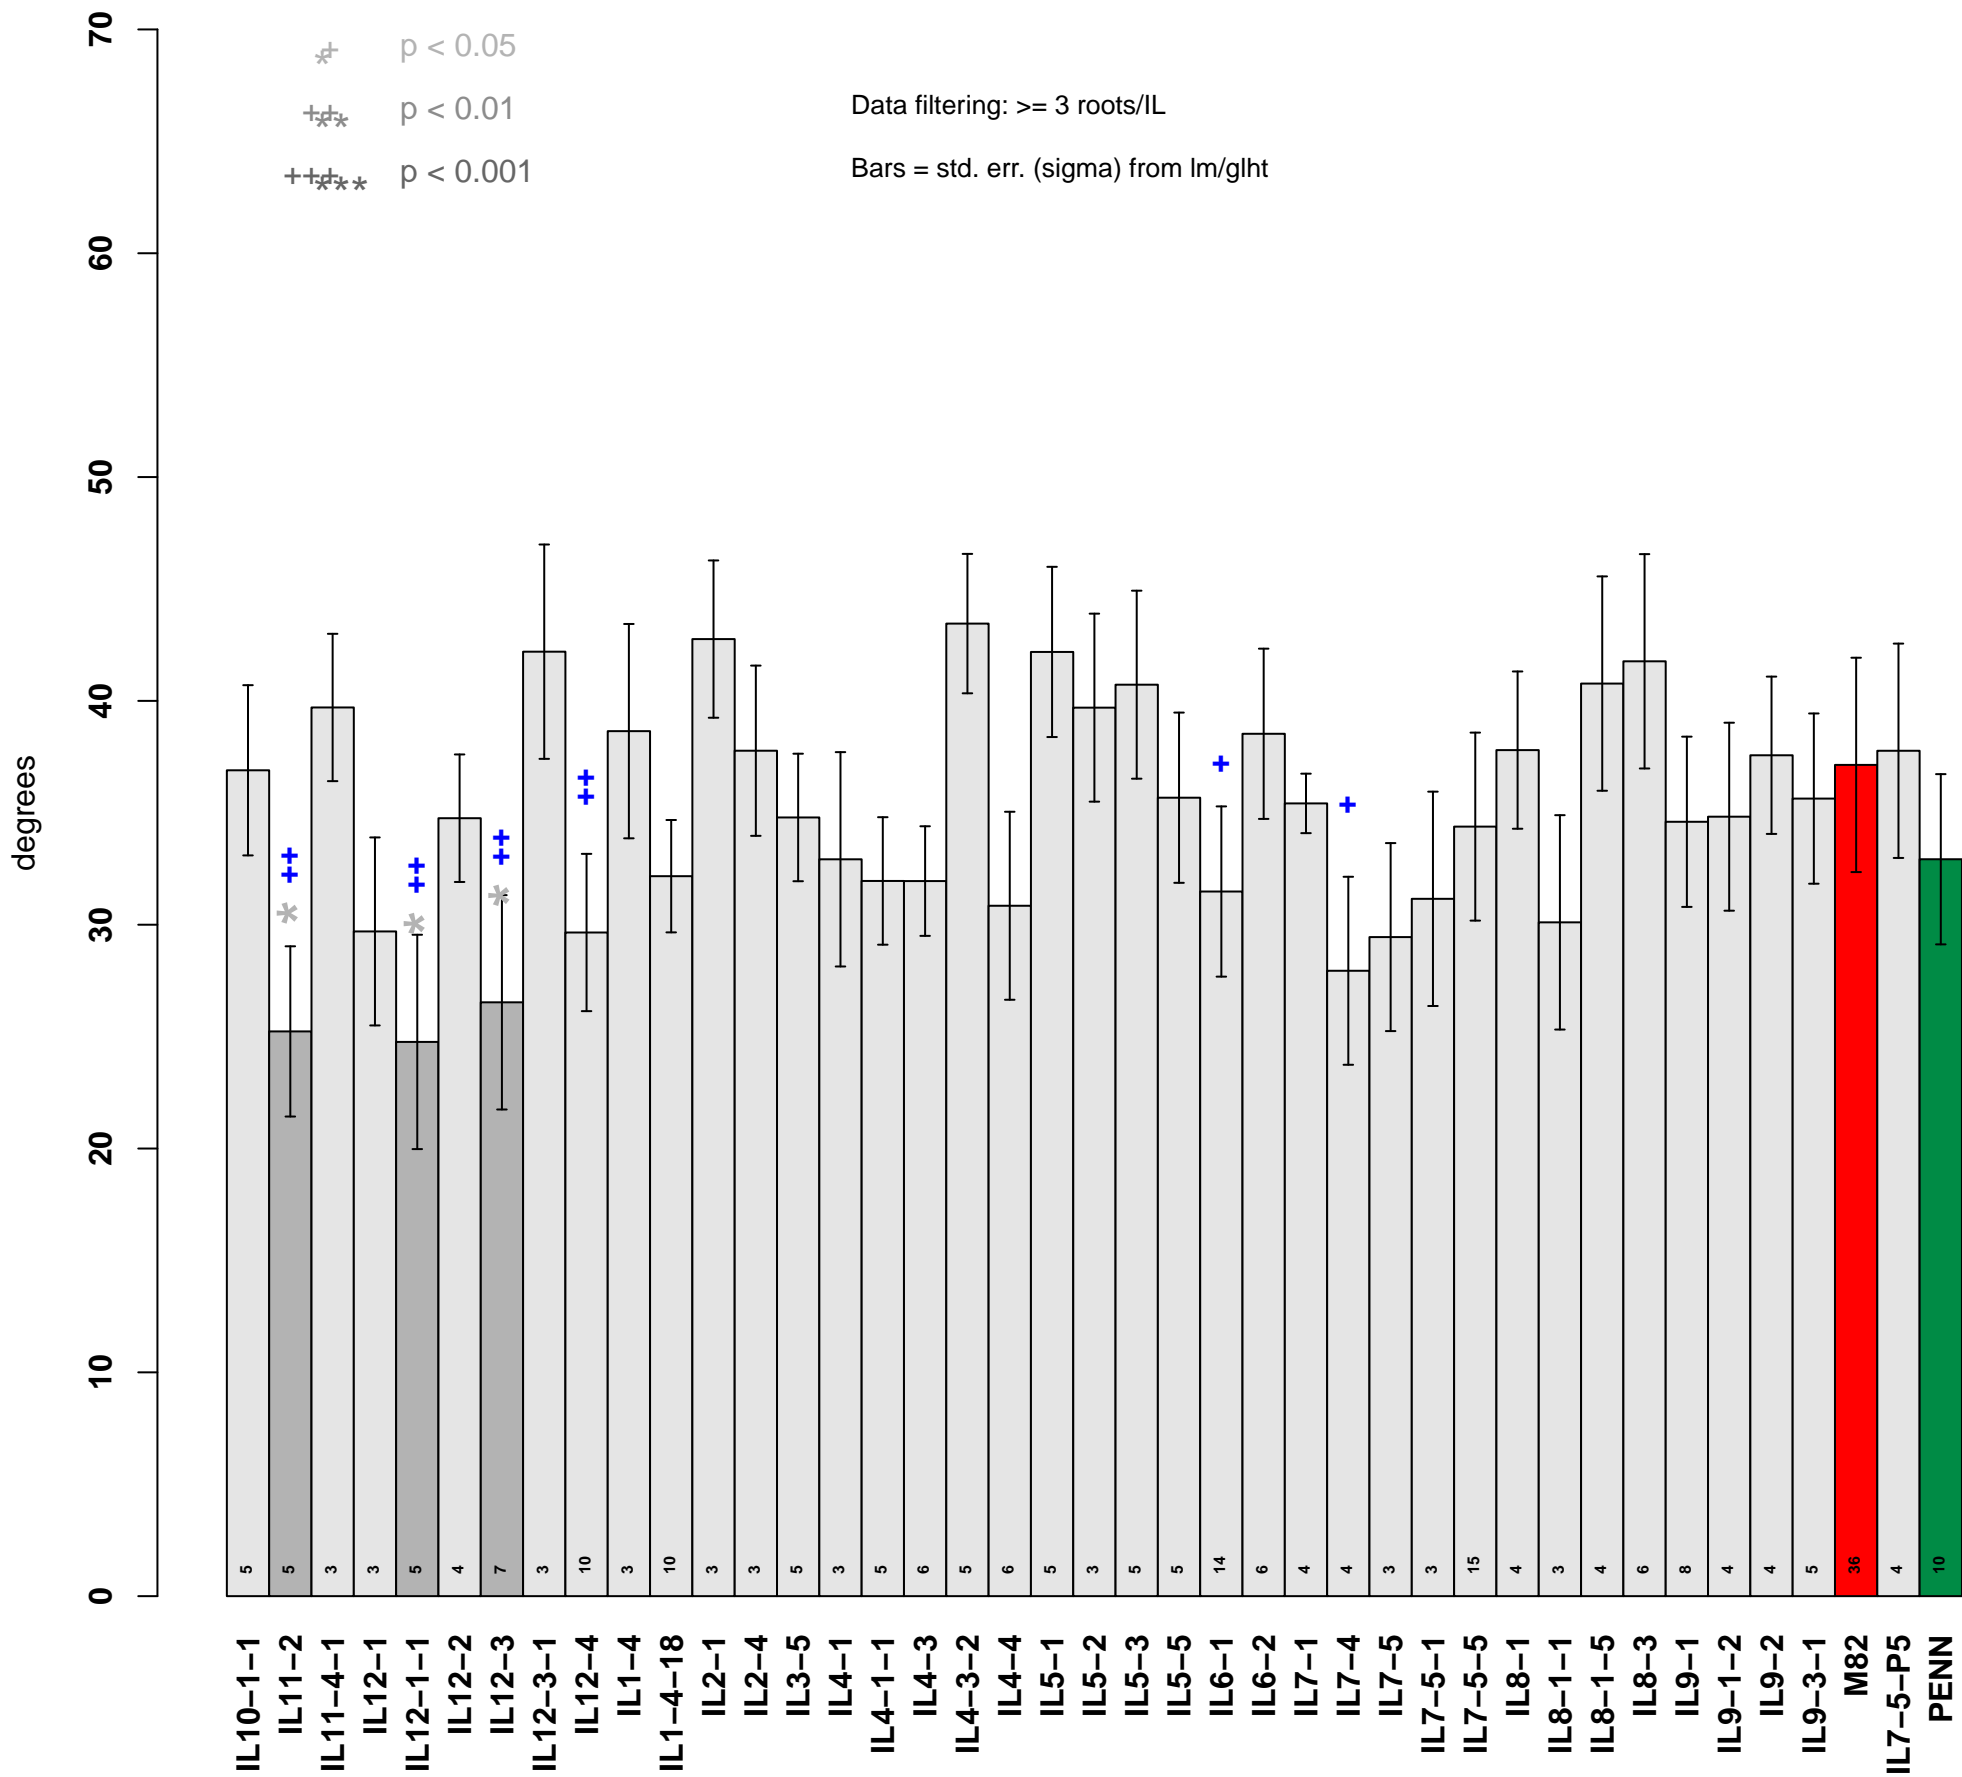

# Angle Thru T30

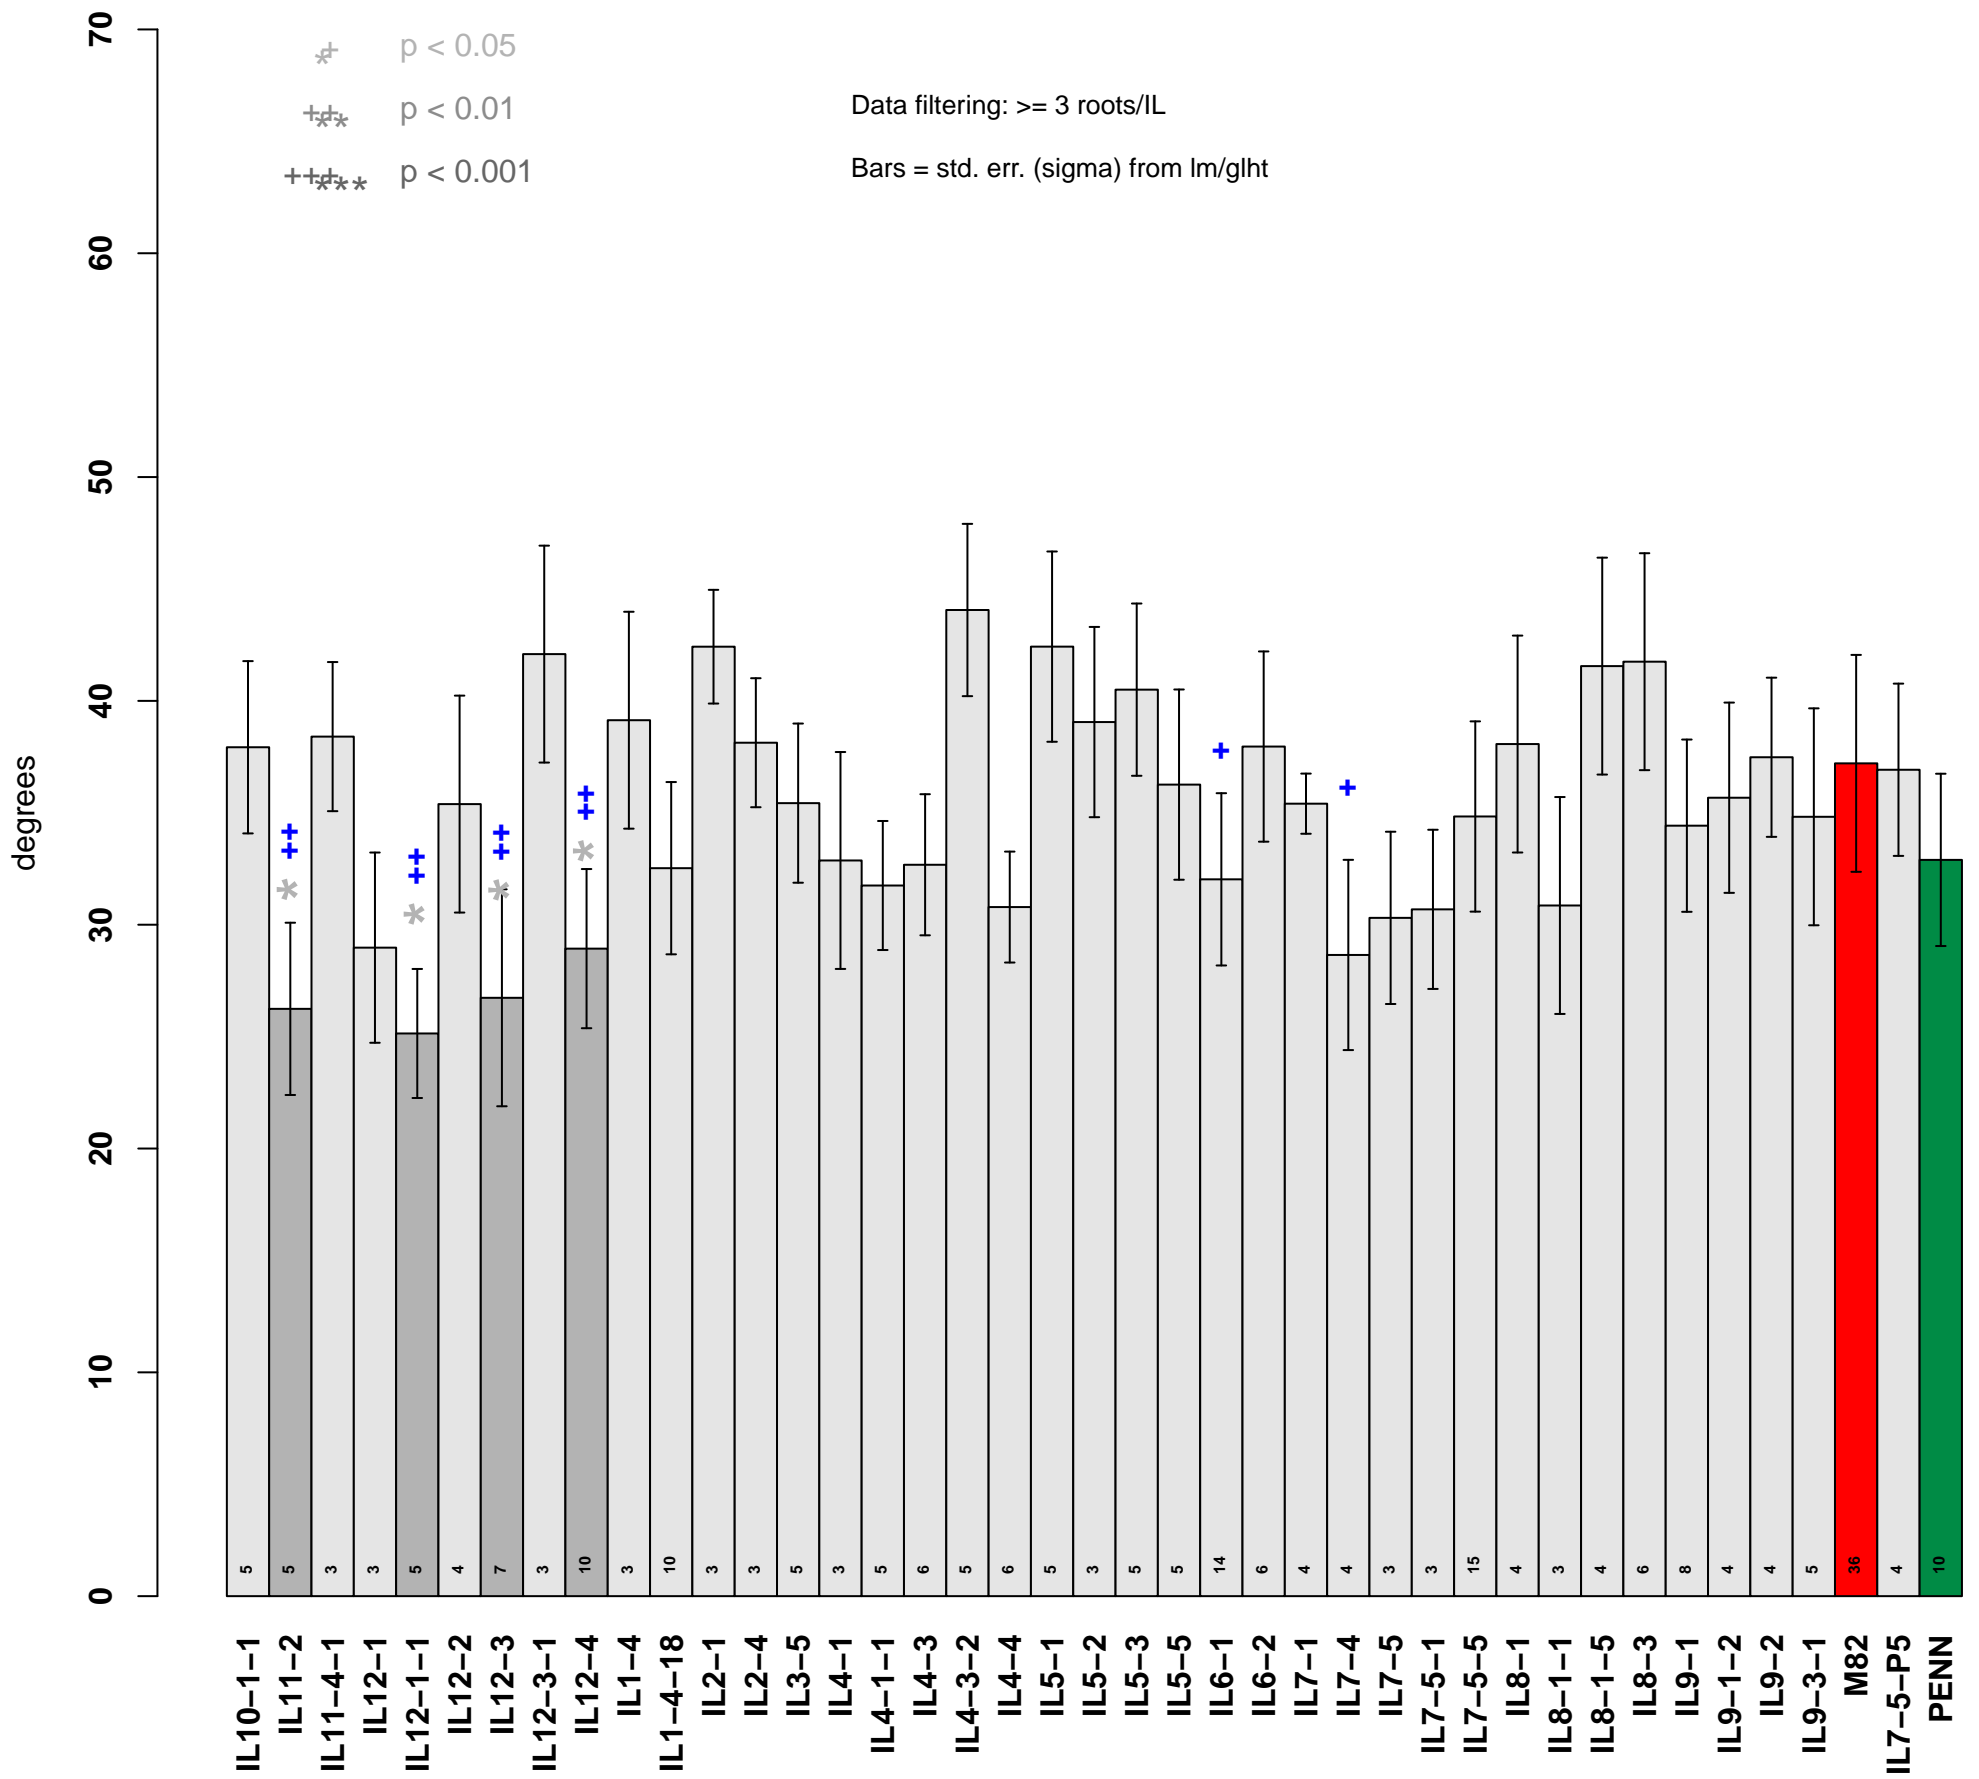

# Angle Thru T31

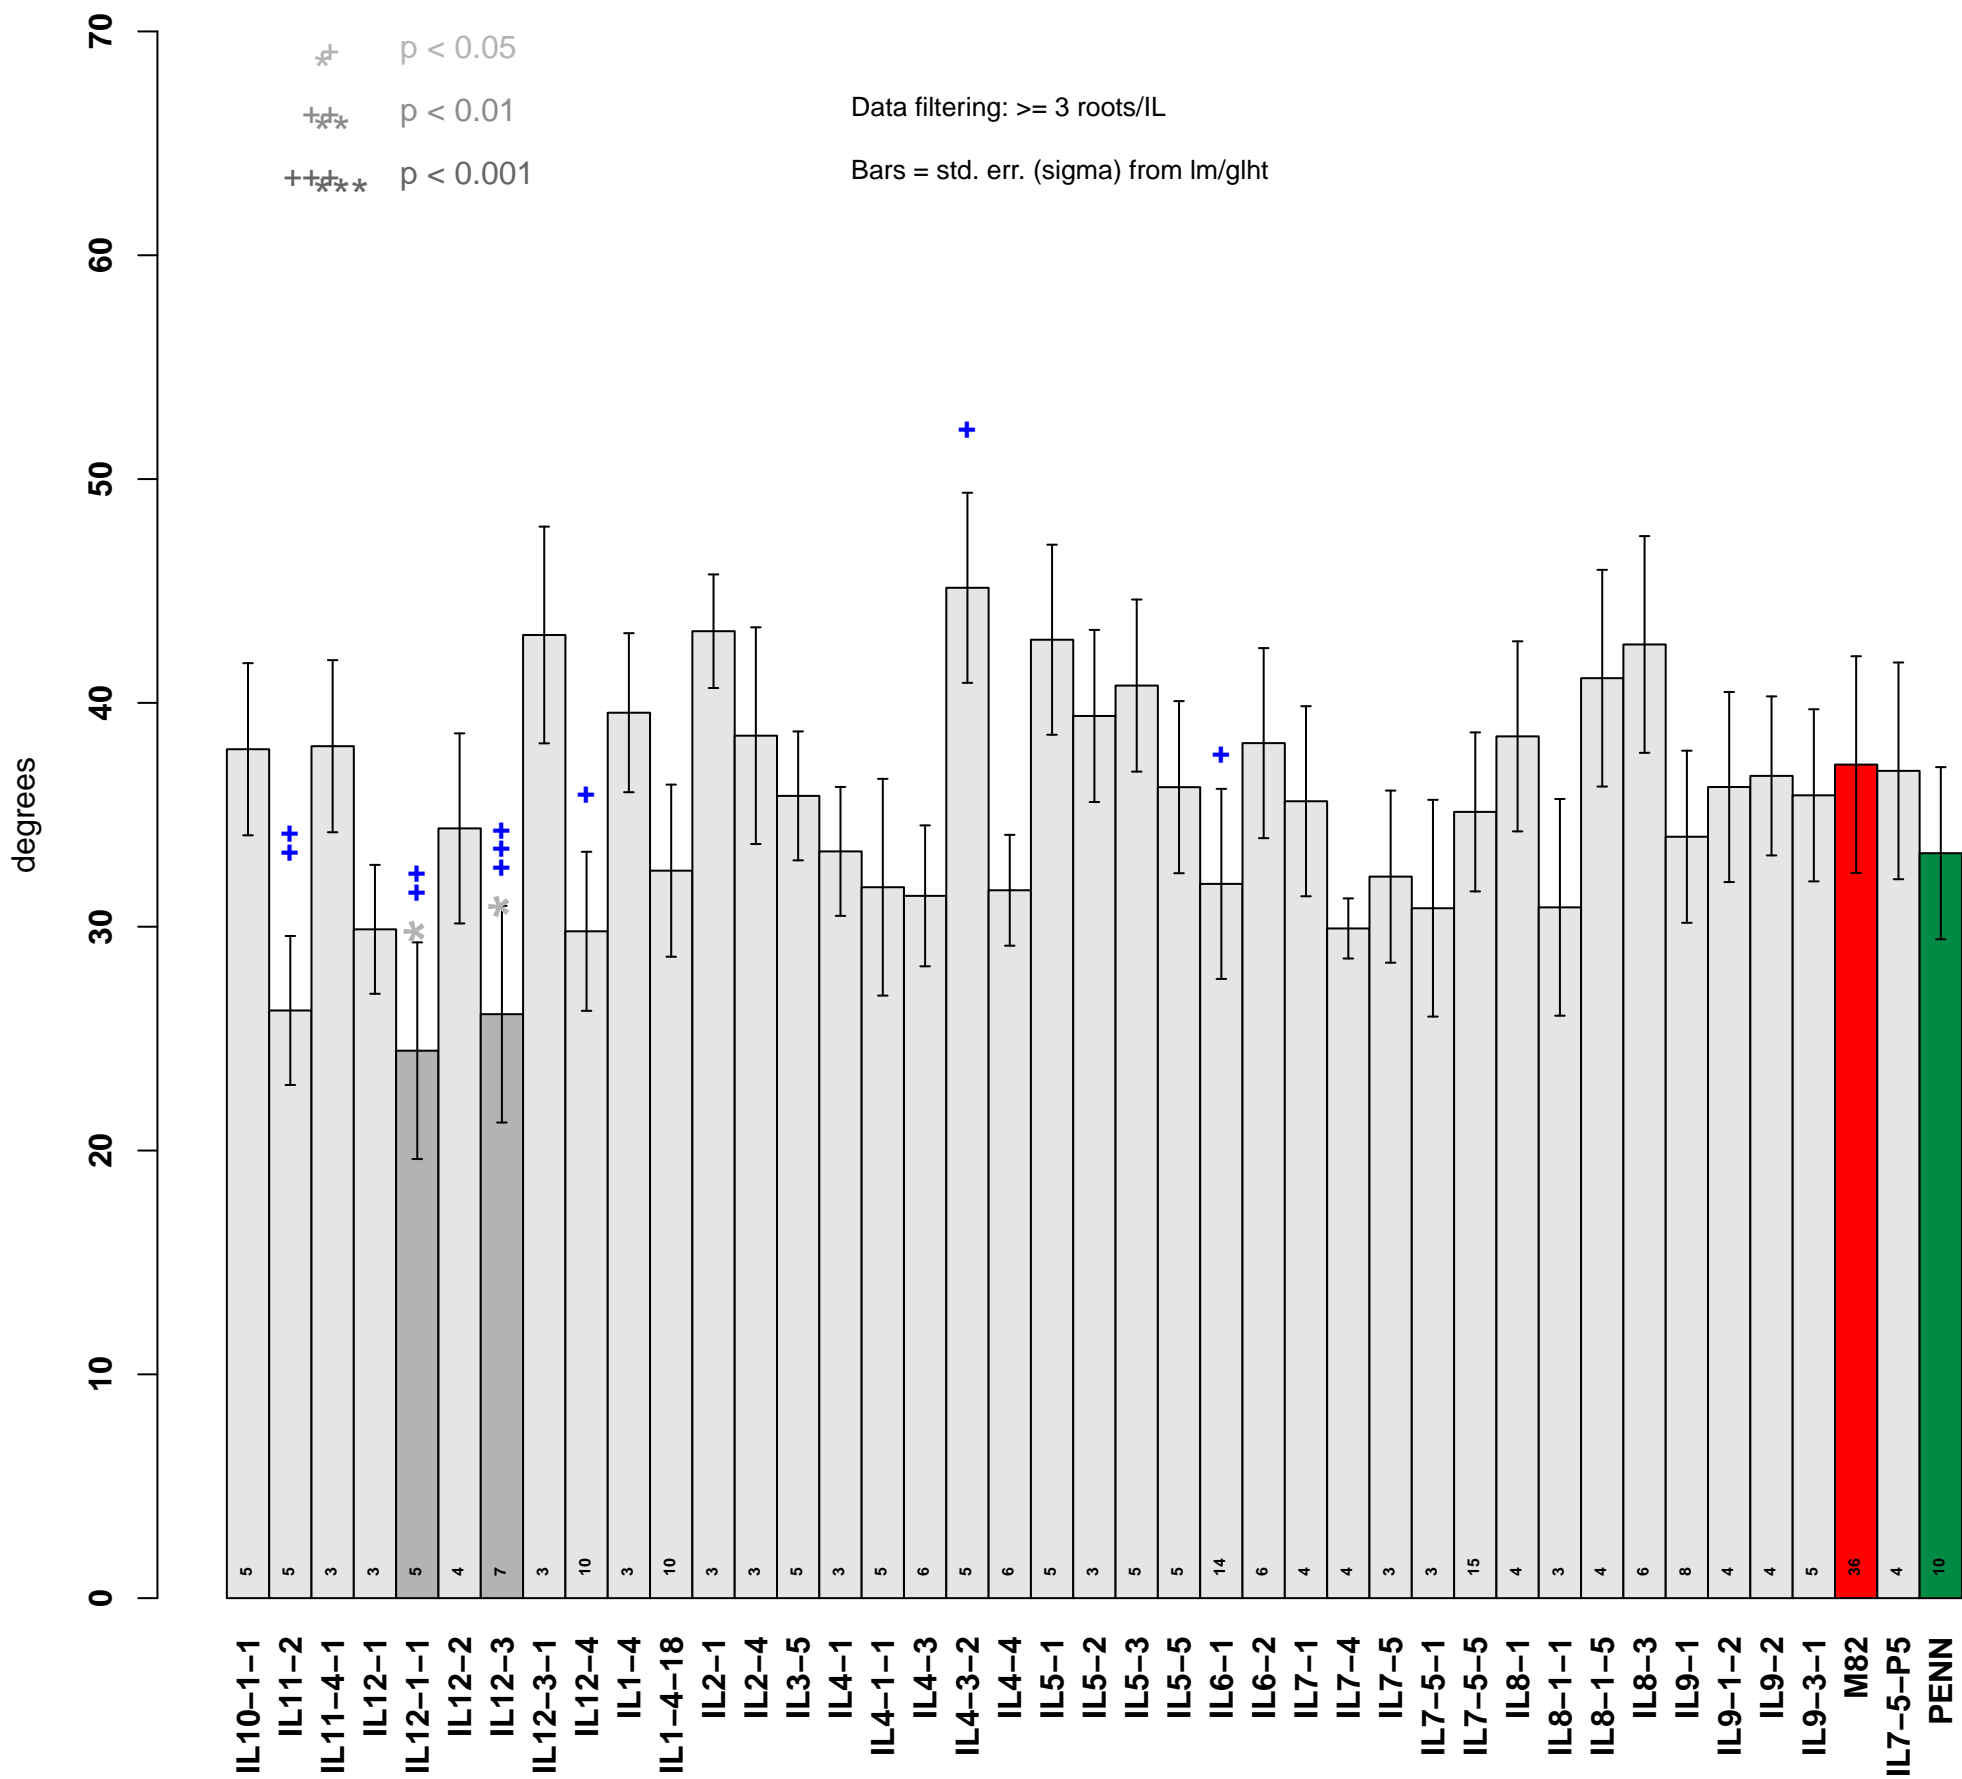



# Angle Thru T32

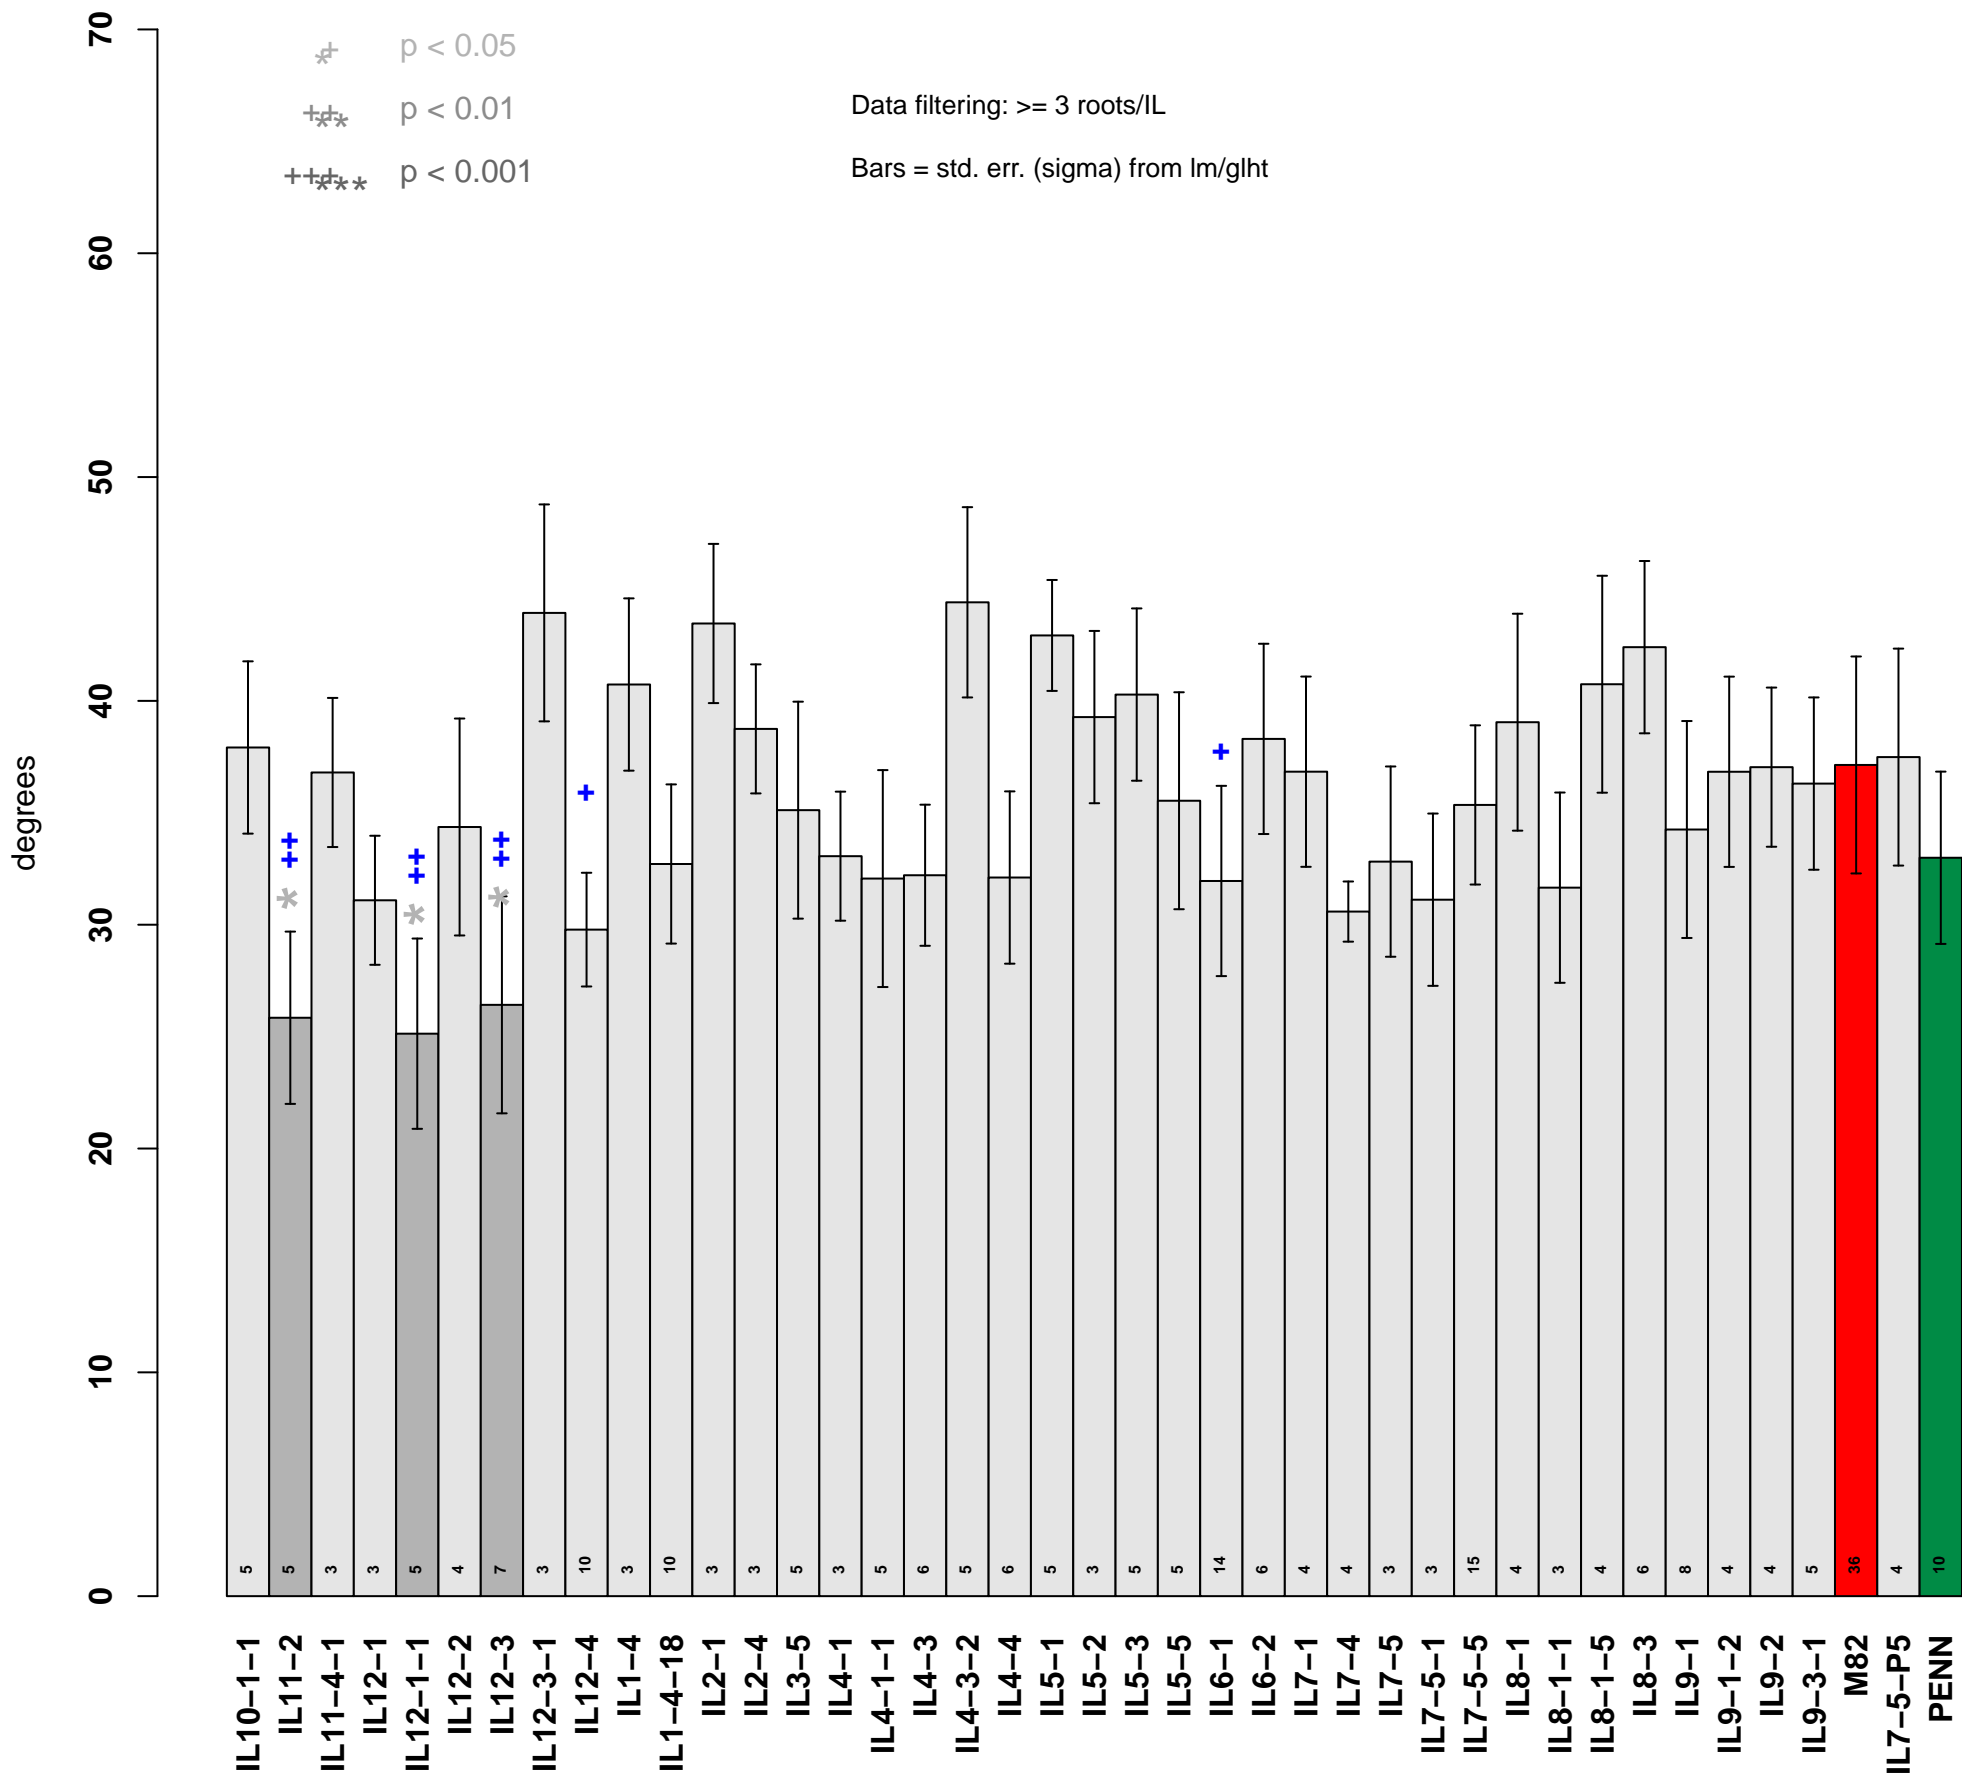

# Angle Thru T33

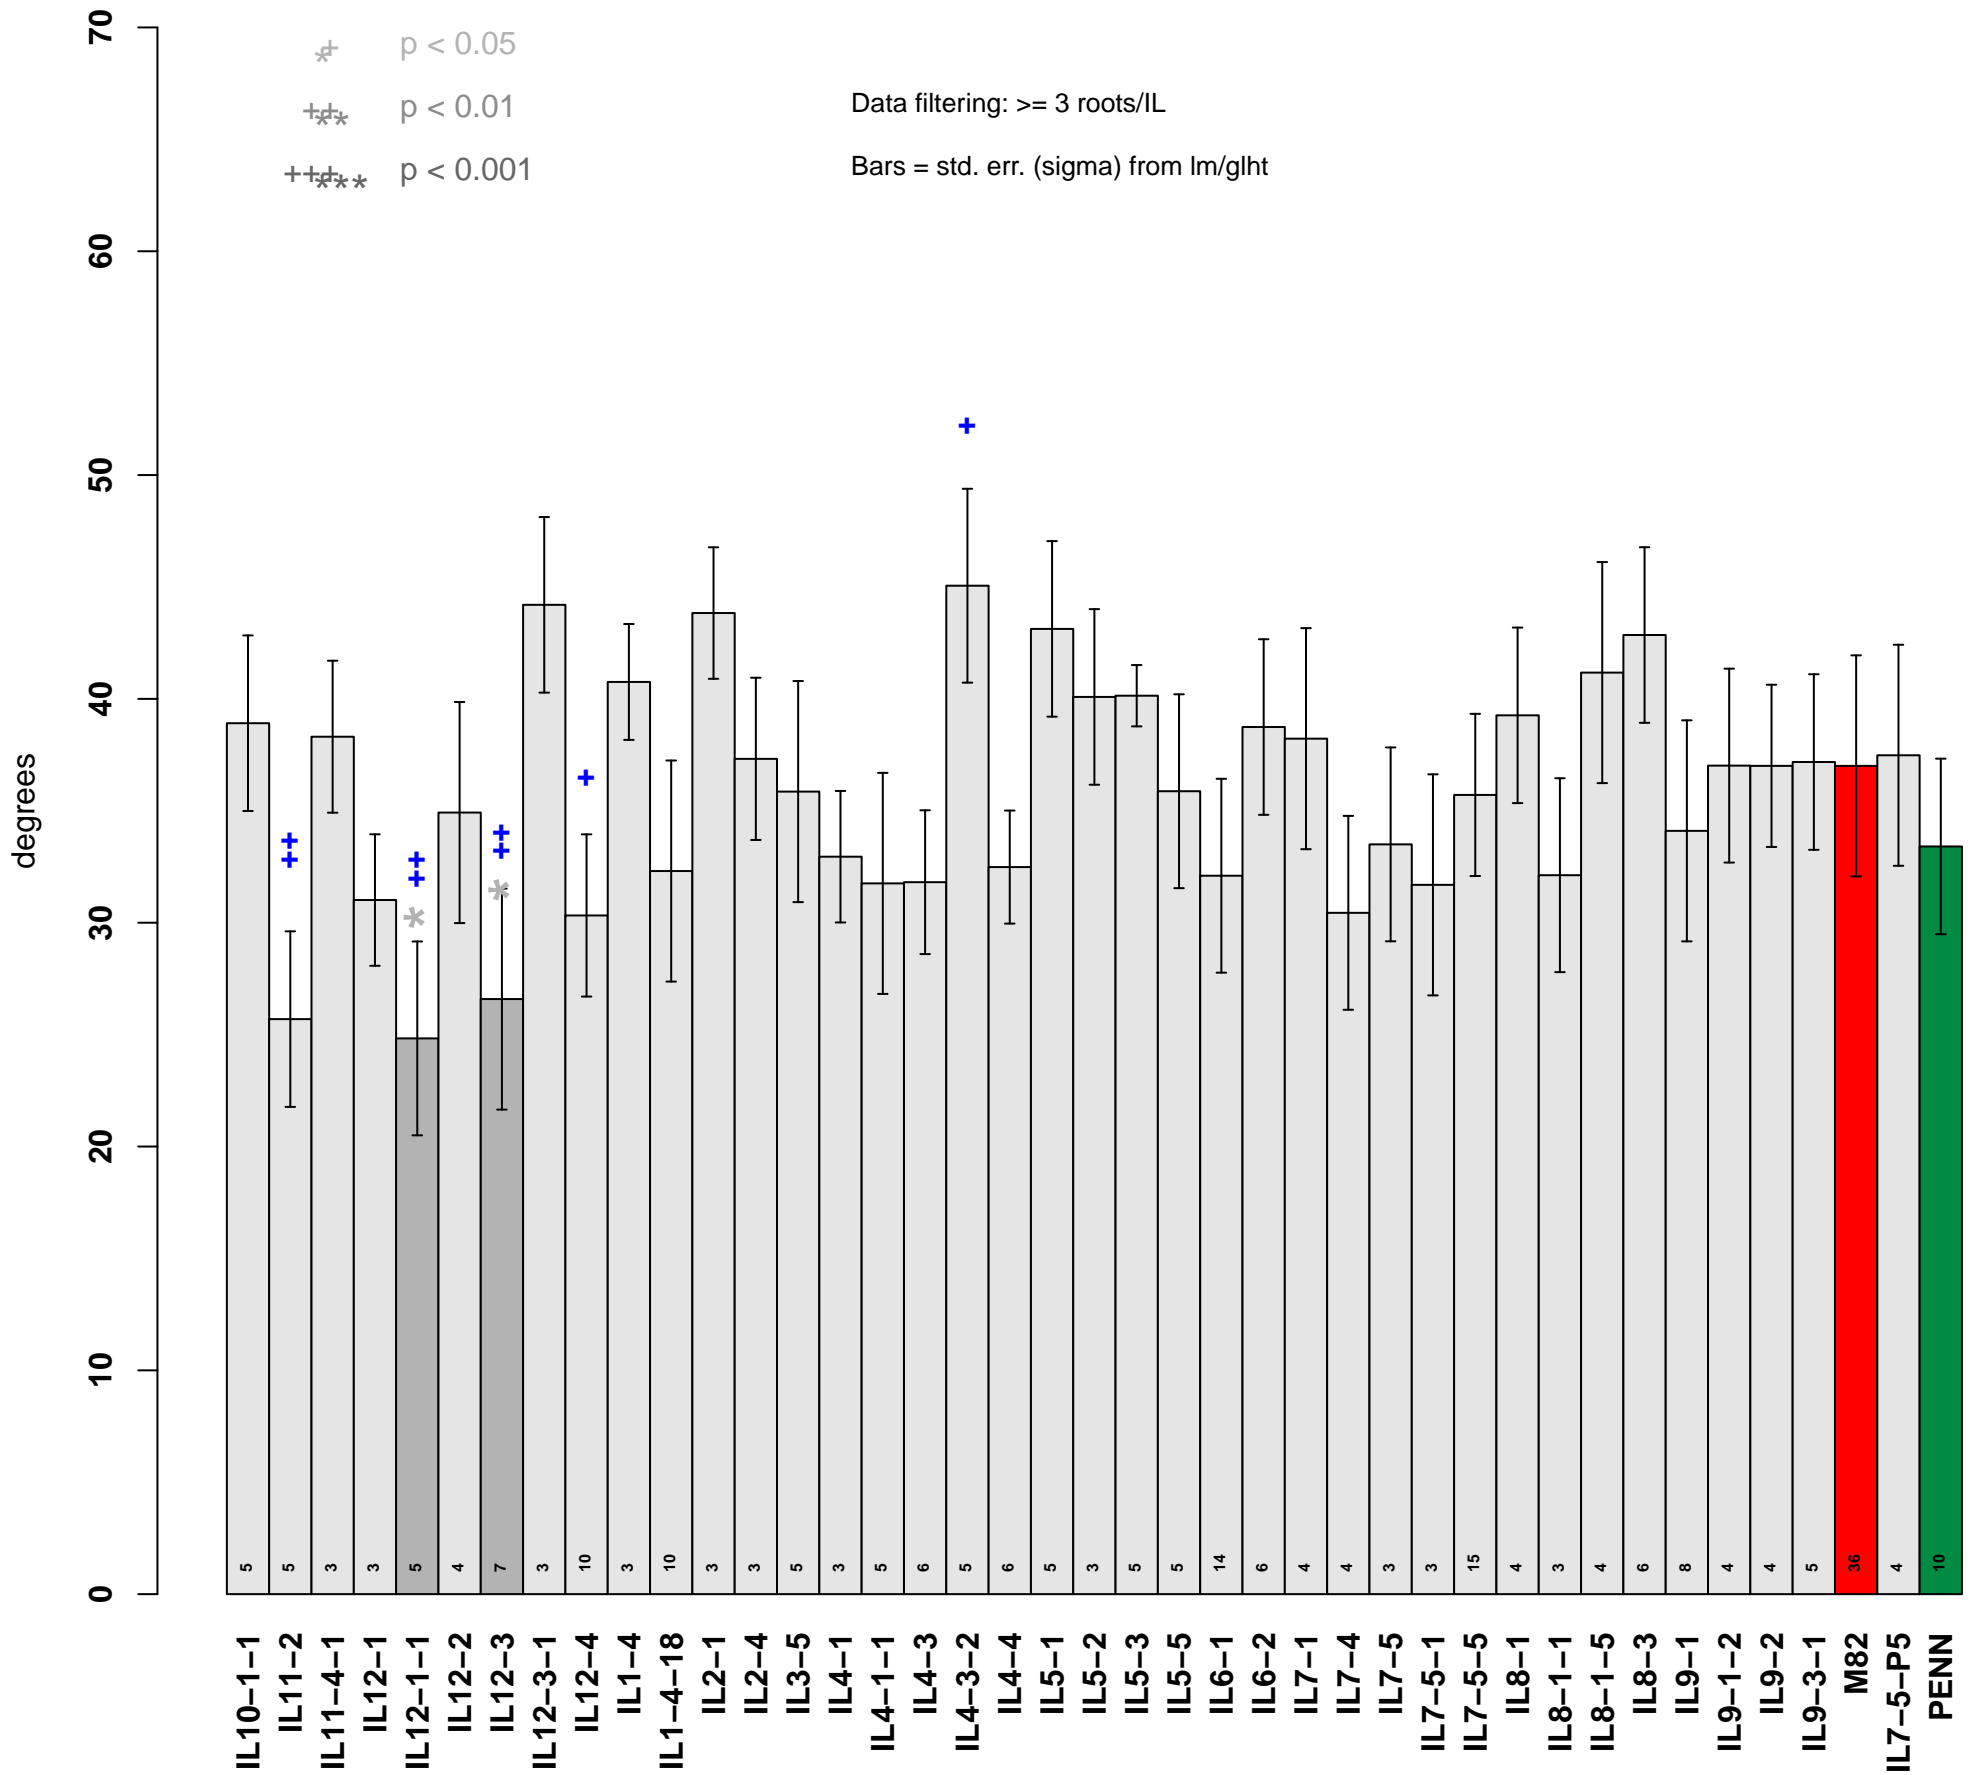

Supplement: Supplementary file 11 [file 2]
