# Supplementary material
Source: publisher figshare collection journal article supplement (https://gsajournals.figshare.com/articles/dataset/_/7237562)

Angle T0

degrees

20  
10  
0  
-10  
-20  
-30

+ \*    p < 0.05  
++ \*\*    p < 0.01  
+++ \*\*\*    p < 0.001

Data filtering: >= 4 roots/IL

Bars = std. err. (sigma) from lm/glht

IL10-1  
IL10-1-1  
IL10-2  
IL10-2-2  
IL10-3  
IL11-1  
IL11-2  
IL11-4  
IL11-4-1  
IL12-1  
IL12-1-1  
IL12-2  
IL12-3  
IL12-3-1  
IL12-4  
IL12-4-1  
IL1-1-2  
IL1-3  
IL1-4  
IL1-4-18  
IL2-1  
IL2-1-1  
IL2-2  
IL2-3  
IL2-4  
IL2-6-5  
IL3-1  
IL3-5  
IL4-1  
IL4-1-1  
IL4-3  
IL4-3-2  
IL4-4  
IL5-1  
IL5-2  
IL5-3  
IL5-5  
IL6-1  
IL6-2  
IL6-4  
IL7-1  
IL7-3  
IL7-4  
IL7-4-1  
IL7-5  
IL7-5-1  
IL7-5-5  
IL8-1  
IL8-1-1  
IL8-1-5  
IL8-3  
IL9-1  
IL9-1-2  
IL9-2  
IL9-2-6  
IL9-3-1  
M82  
IL7-5-P5  
PENN

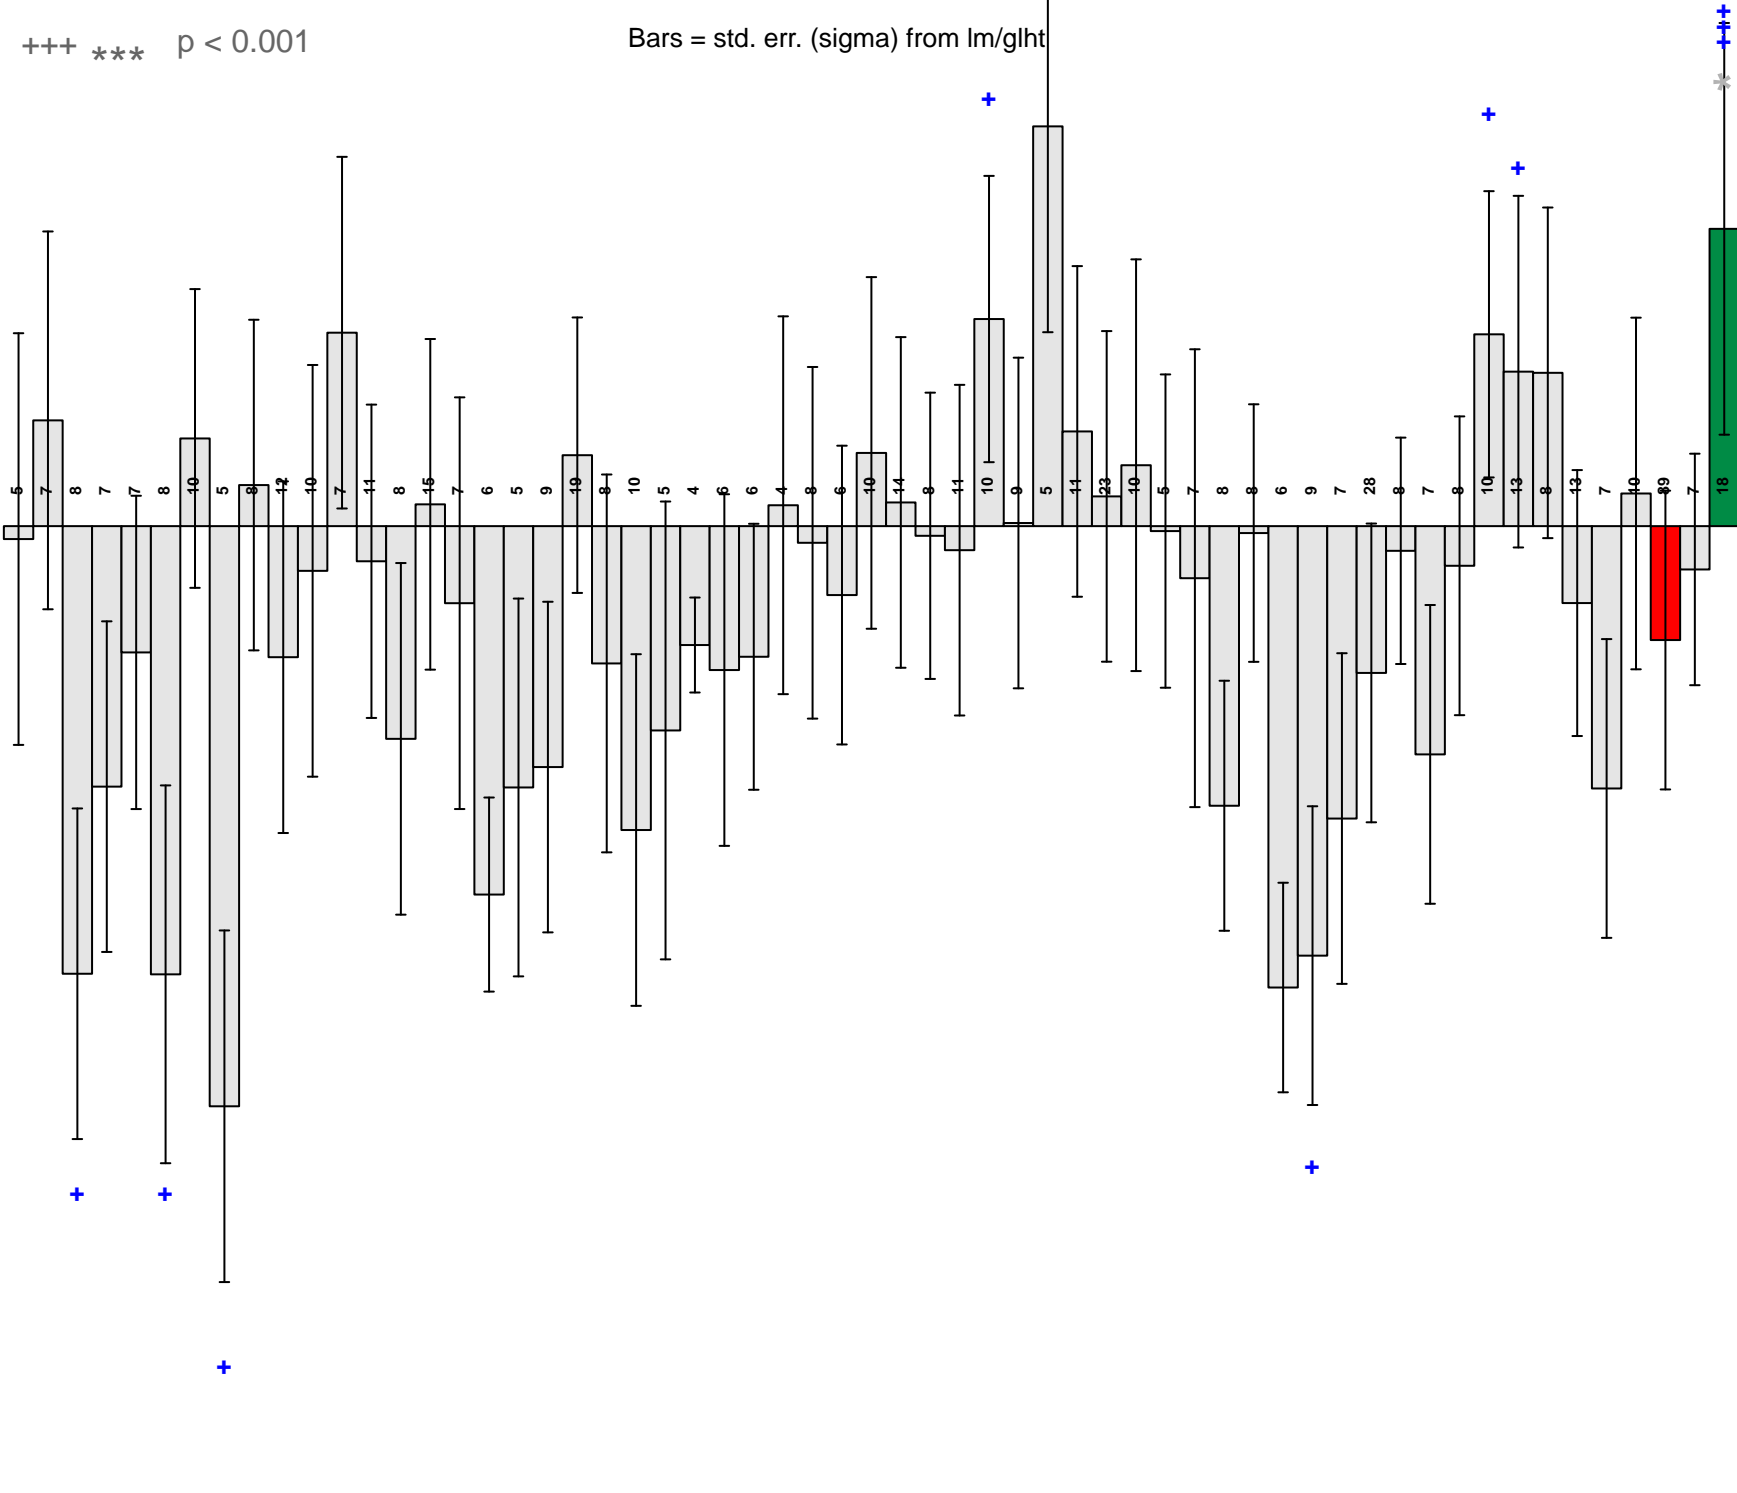

# Angle T1

degrees

20  
10  
0  
-10  
-20  
-30

+ \*  $p < 0.05$   
++ \*\*  $p < 0.01$   
+++ \*\*\*  $p < 0.001$

Data filtering:  $\geq 4$  roots/IL

Bars = std. err. (sigma) from lm/glht

IL10-1  
IL10-1-1  
IL10-2  
IL10-2-2  
IL10-3  
IL11-1  
IL11-2  
IL11-4  
IL11-4-1  
IL12-1  
IL12-1-1  
IL12-2  
IL12-3  
IL12-3-1  
IL12-4  
IL12-4-1  
IL1-1-2  
IL1-3  
IL1-4  
IL1-4-18  
IL2-1  
IL2-1-1  
IL2-2  
IL2-3  
IL2-4  
IL2-6-5  
IL3-1  
IL3-5  
IL4-1  
IL4-1-1  
IL4-3  
IL4-3-2  
IL4-4  
IL5-1  
IL5-2  
IL5-3  
IL5-5  
IL6-1  
IL6-2  
IL6-4  
IL7-1  
IL7-3  
IL7-4  
IL7-4-1  
IL7-5  
IL7-5-1  
IL7-5-5  
IL8-1  
IL8-1-1  
IL8-1-5  
IL8-3  
IL9-1  
IL9-1-2  
IL9-2  
IL9-2-6  
IL9-3-1  
M82  
IL7-5-P5  
PENN

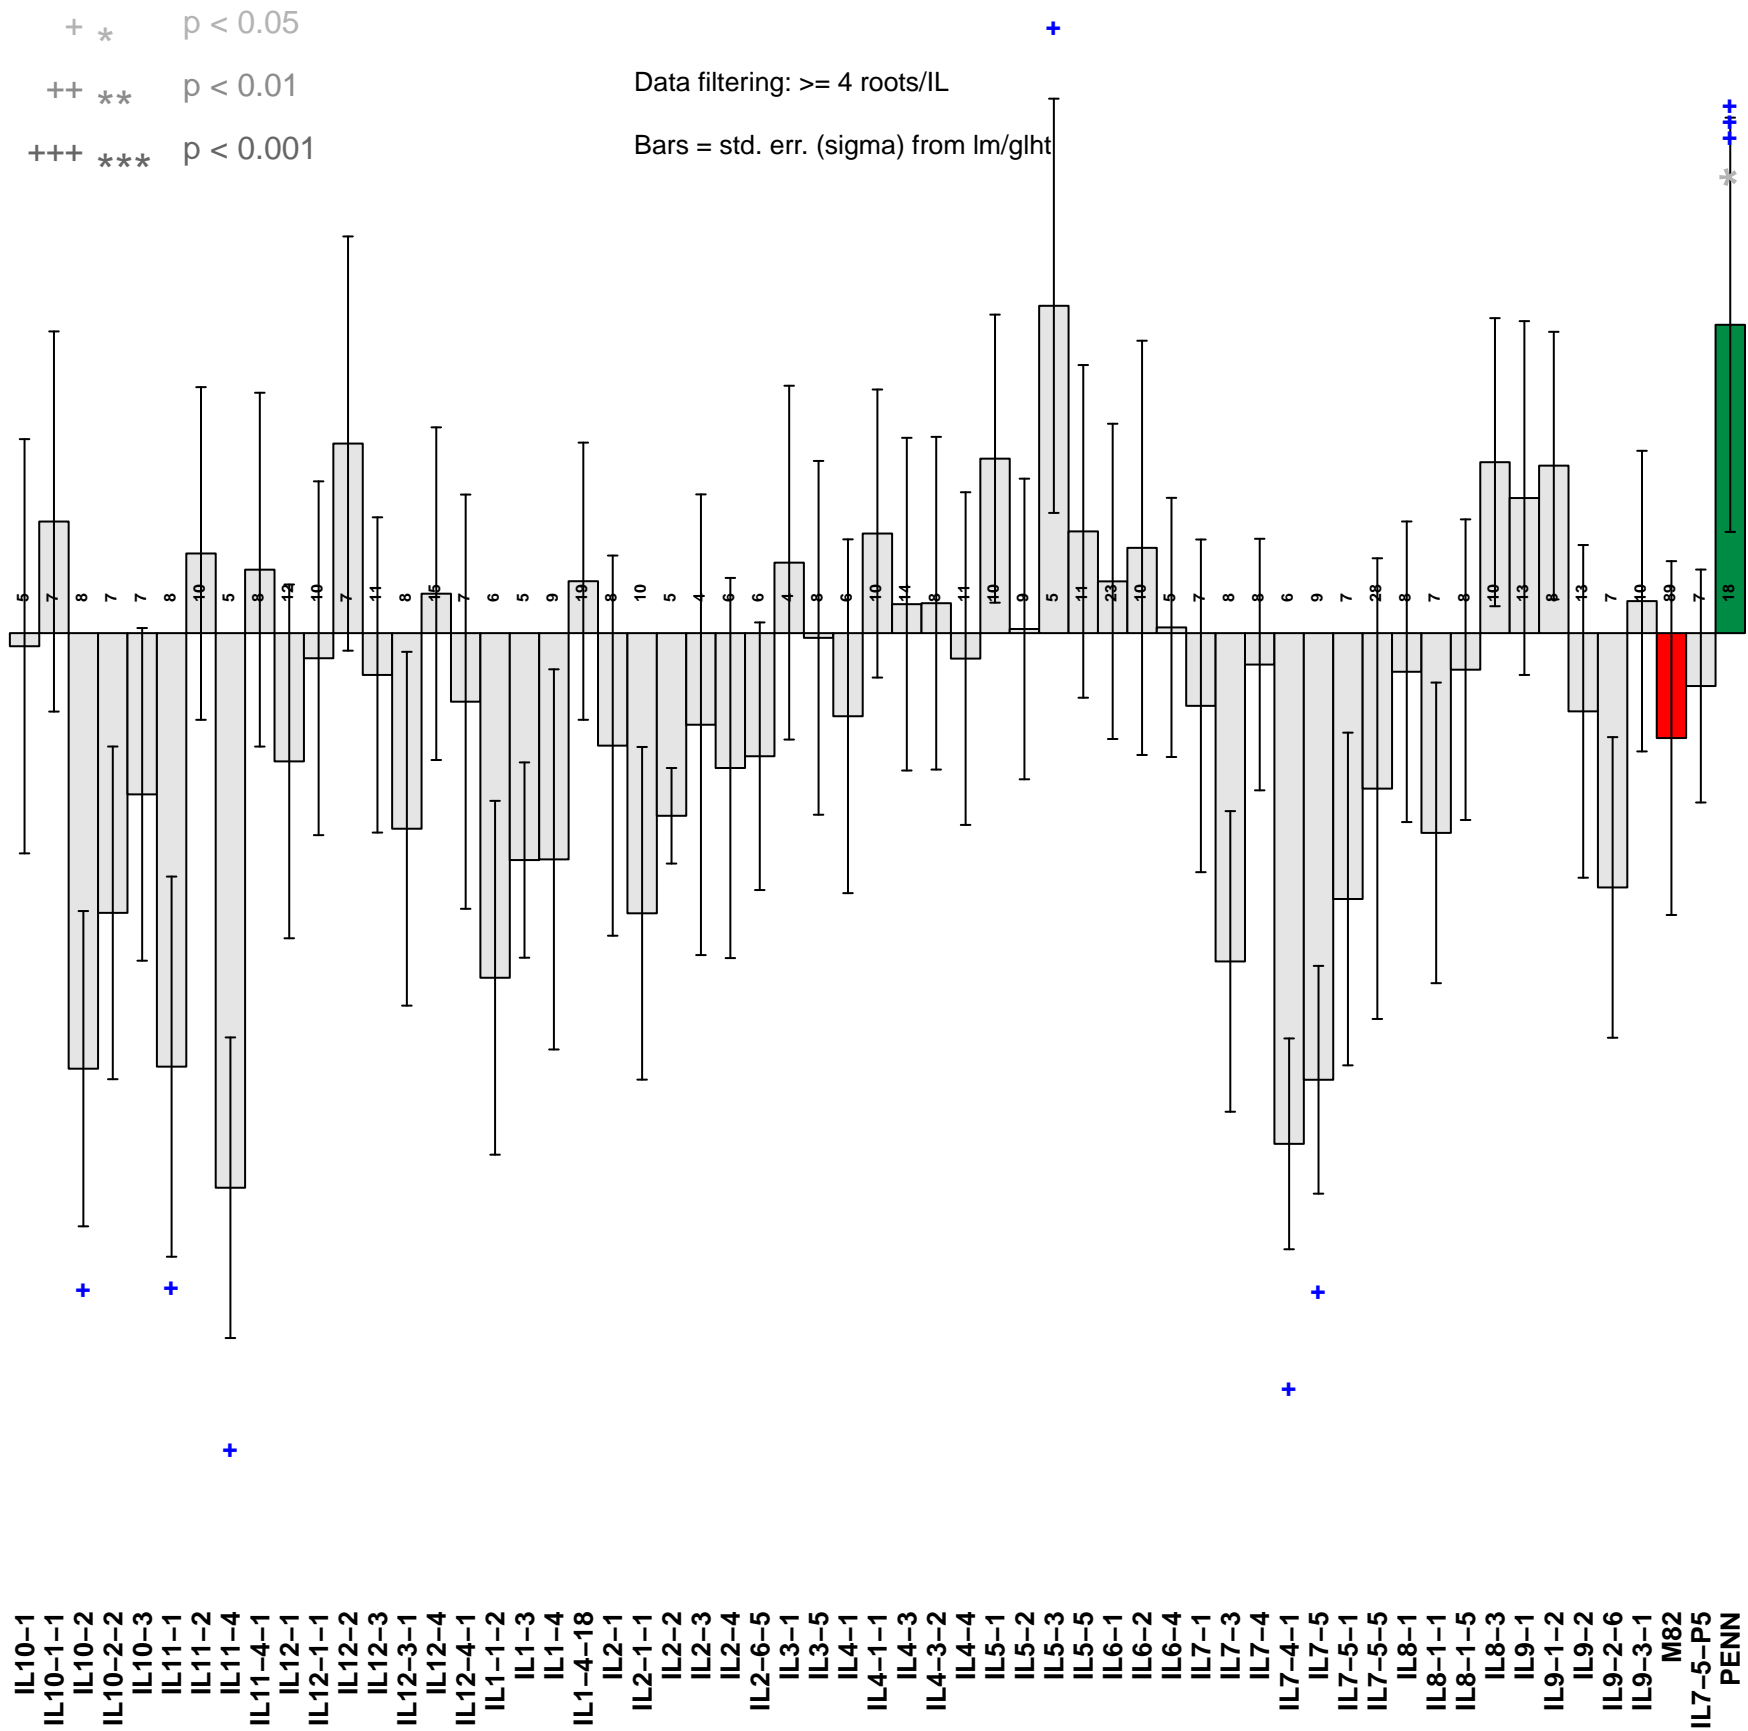

# Angle T2

degrees

20  
10  
0  
-10  
-20  
-30

+ \*  $p < 0.05$   
++ \*\*  $p < 0.01$   
+++ \*\*\*  $p < 0.001$

Data filtering:  $\geq 4$  roots/IL

Bars = std. err. (sigma) from lm/glht

IL10-1  
IL10-1-1  
IL10-2  
IL10-2-2  
IL10-3  
IL11-1  
IL11-2  
IL11-4  
IL11-4-1  
IL12-1  
IL12-1-1  
IL12-2  
IL12-3  
IL12-3-1  
IL12-4  
IL12-4-1  
IL1-1-2  
IL1-3  
IL1-4  
IL1-4-18  
IL2-1  
IL2-1-1  
IL2-2  
IL2-3  
IL2-4  
IL2-6-5  
IL3-1  
IL3-5  
IL4-1  
IL4-1-1  
IL4-3  
IL4-3-2  
IL4-4  
IL5-1  
IL5-2  
IL5-3  
IL5-5  
IL6-1  
IL6-2  
IL6-4  
IL7-1  
IL7-3  
IL7-4  
IL7-4-1  
IL7-5  
IL7-5-1  
IL7-5-5  
IL8-1  
IL8-1-1  
IL8-1-5  
IL8-3  
IL9-1  
IL9-1-2  
IL9-2  
IL9-2-6  
IL9-3-1  
M82  
IL7-5-P5  
PENN

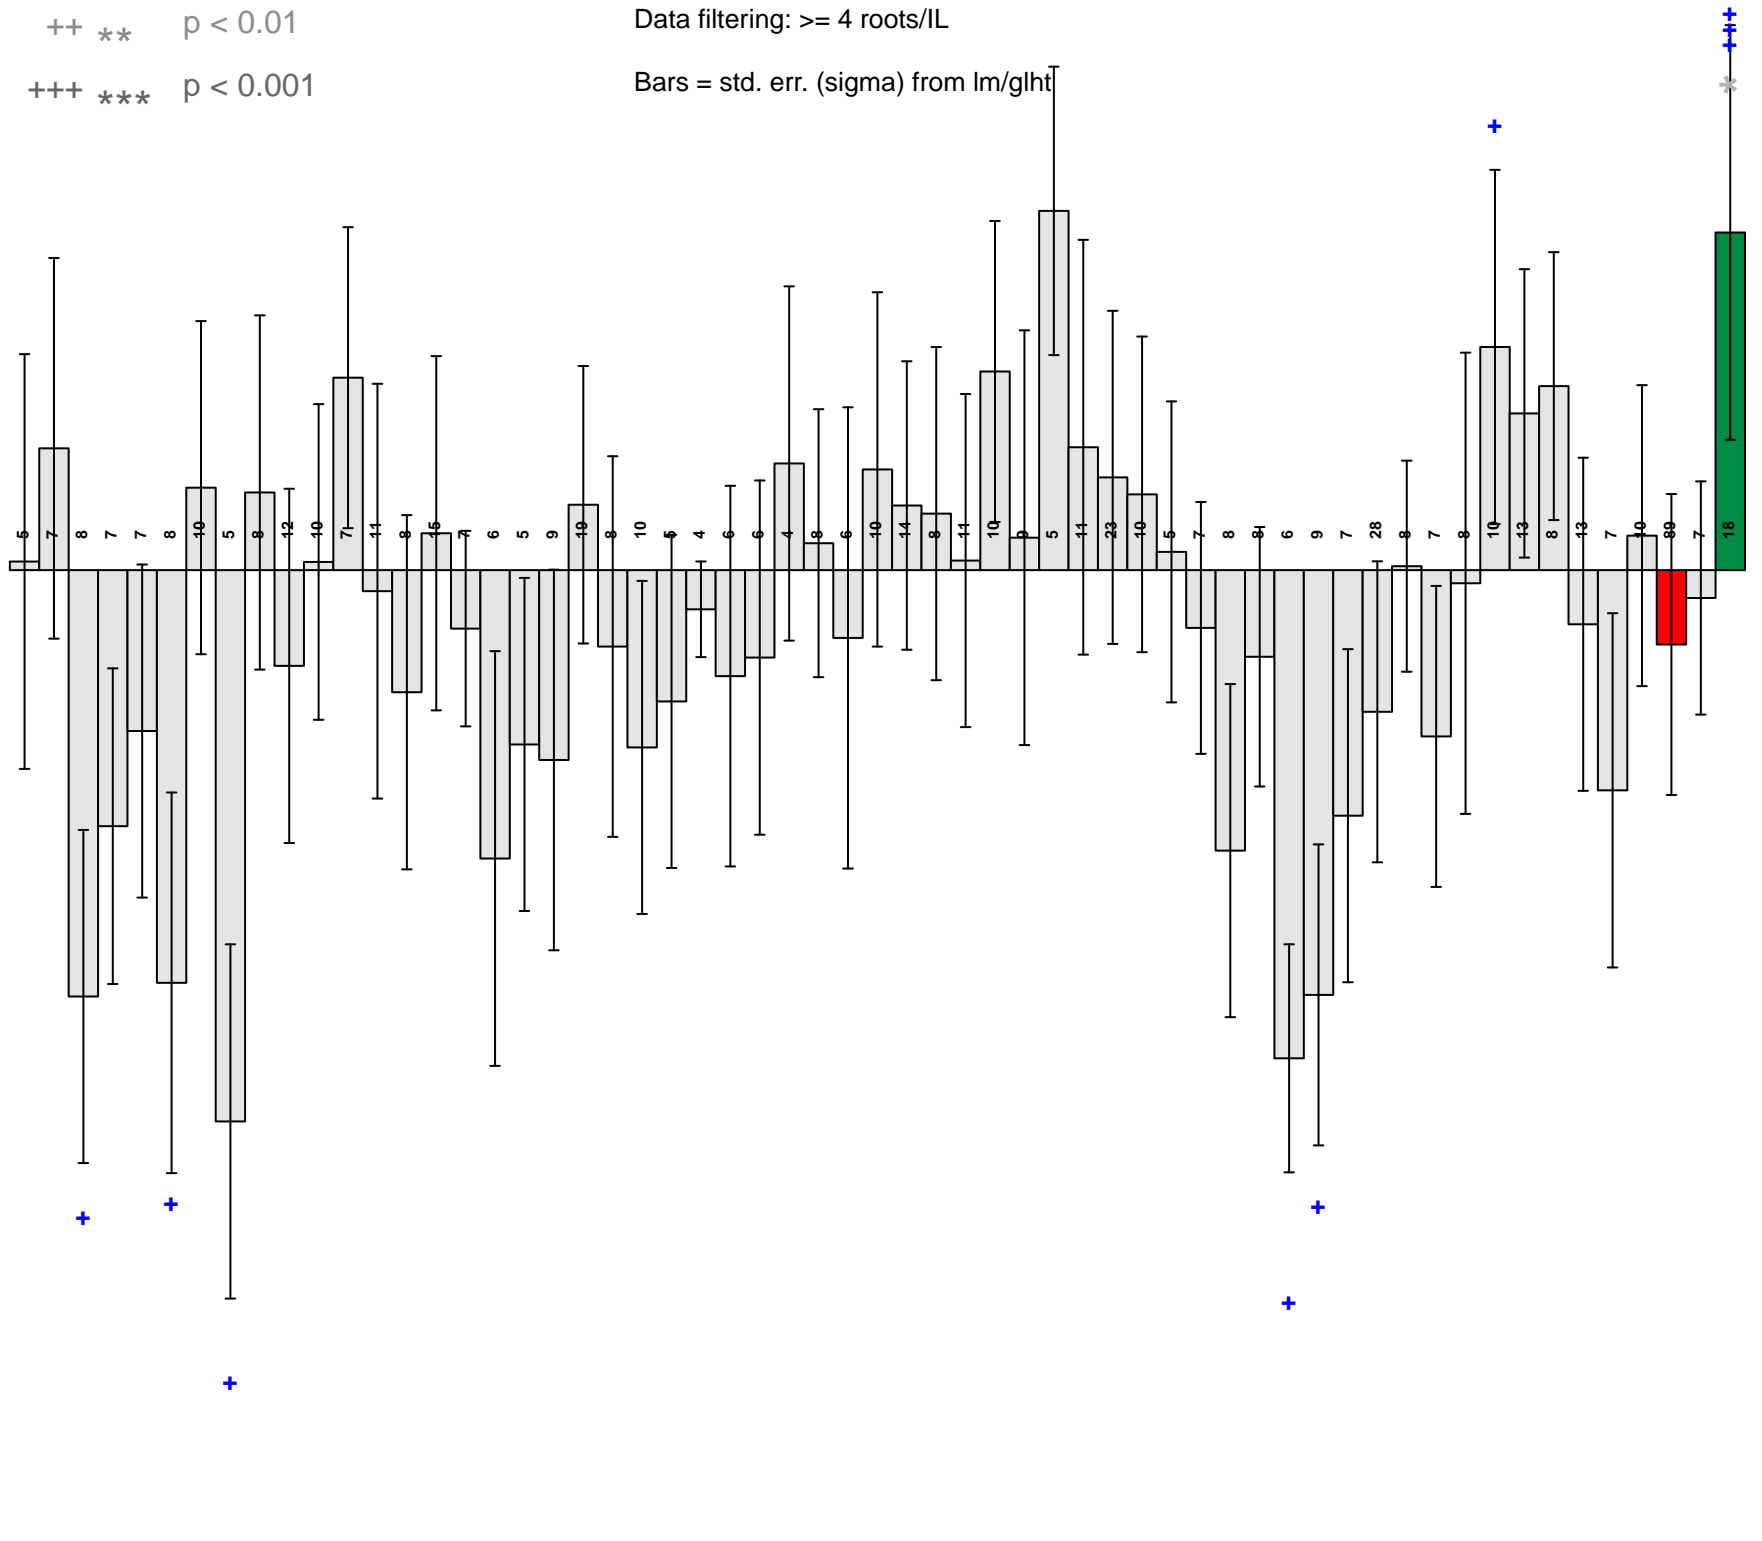

# Angle T3

degrees

20  
10  
0  
-10  
-20  
-30

+ \* p < 0.05  
++ \*\* p < 0.01  
+++ \*\*\* p < 0.001

Data filtering: >= 4 roots/IL

Bars = std. err. (sigma) from lm/glht

IL10-1  
IL10-1-1  
IL10-2  
IL10-2-2  
IL10-3  
IL11-1  
IL11-2  
IL11-4  
IL11-4-1  
IL12-1  
IL12-1-1  
IL12-2  
IL12-3  
IL12-3-1  
IL12-4  
IL12-4-1  
IL11-1-2  
IL1-3  
IL1-4  
IL1-4-18  
IL2-1  
IL2-1-1  
IL2-2  
IL2-3  
IL2-4  
IL2-6-5  
IL3-1  
IL3-5  
IL4-1  
IL4-1-1  
IL4-3  
IL4-3-2  
IL4-4  
IL5-1  
IL5-2  
IL5-3  
IL5-5  
IL6-1  
IL6-2  
IL6-4  
IL7-1  
IL7-3  
IL7-4  
IL7-4-1  
IL7-5  
IL7-5-1  
IL7-5-5  
IL8-1  
IL8-1-1  
IL8-1-5  
IL8-3  
IL9-1  
IL9-1-2  
IL9-2  
IL9-2-6  
IL9-3-1  
M82  
IL7-5-P5  
PENN

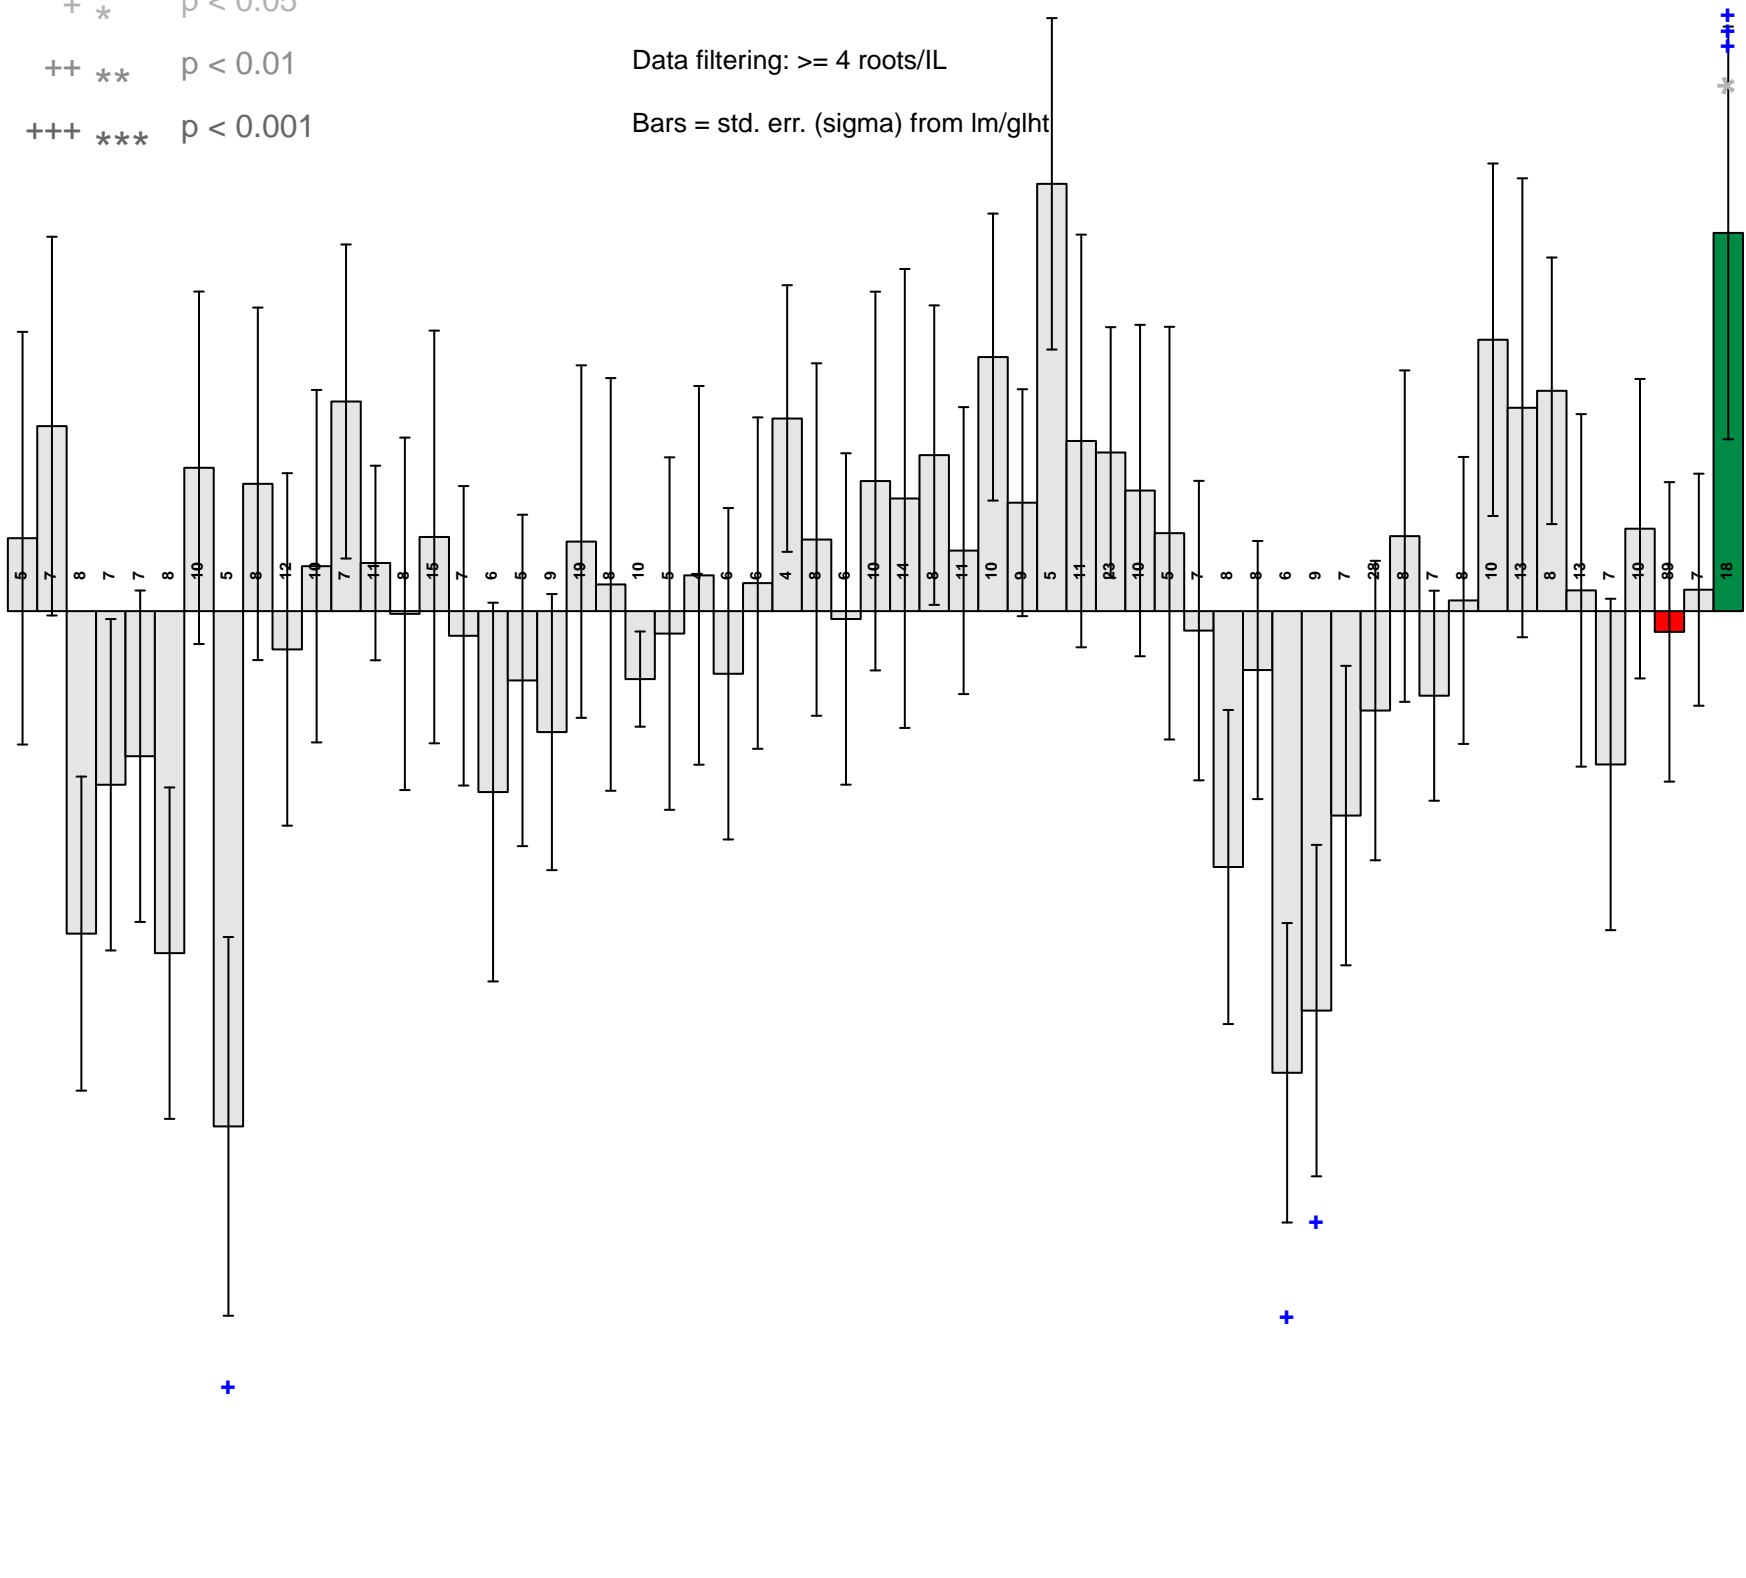

# Angle T4

degrees

30  
20  
10  
0  
-10  
-20  
-30

+ \* p < 0.05  
++ \*\* p < 0.01  
+++ \*\*\* p < 0.001

Data filtering: >= 4 roots/IL

Bars = std. err. (sigma) from lm/glht

IL10-1  
IL10-1-1  
IL10-2  
IL10-2-2  
IL10-3  
IL11-1  
IL11-2  
IL11-4  
IL11-4-1  
IL12-1  
IL12-1-1  
IL12-2  
IL12-3  
IL12-3-1  
IL12-4  
IL12-4-1  
IL1-1-2  
IL1-3  
IL1-4  
IL1-4-18  
IL2-1  
IL2-1-1  
IL2-2  
IL2-3  
IL2-4  
IL2-6-5  
IL3-1  
IL3-5  
IL4-1  
IL4-1-1  
IL4-3  
IL4-3-2  
IL4-4  
IL5-1  
IL5-2  
IL5-3  
IL5-5  
IL6-1  
IL6-2  
IL6-4  
IL7-1  
IL7-3  
IL7-4  
IL7-4-1  
IL7-5  
IL7-5-1  
IL7-5-5  
IL8-1  
IL8-1-1  
IL8-1-5  
IL8-3  
IL9-1  
IL9-1-2  
IL9-2  
IL9-2-6  
IL9-3-1  
M82  
IL7-5-P5  
PENN

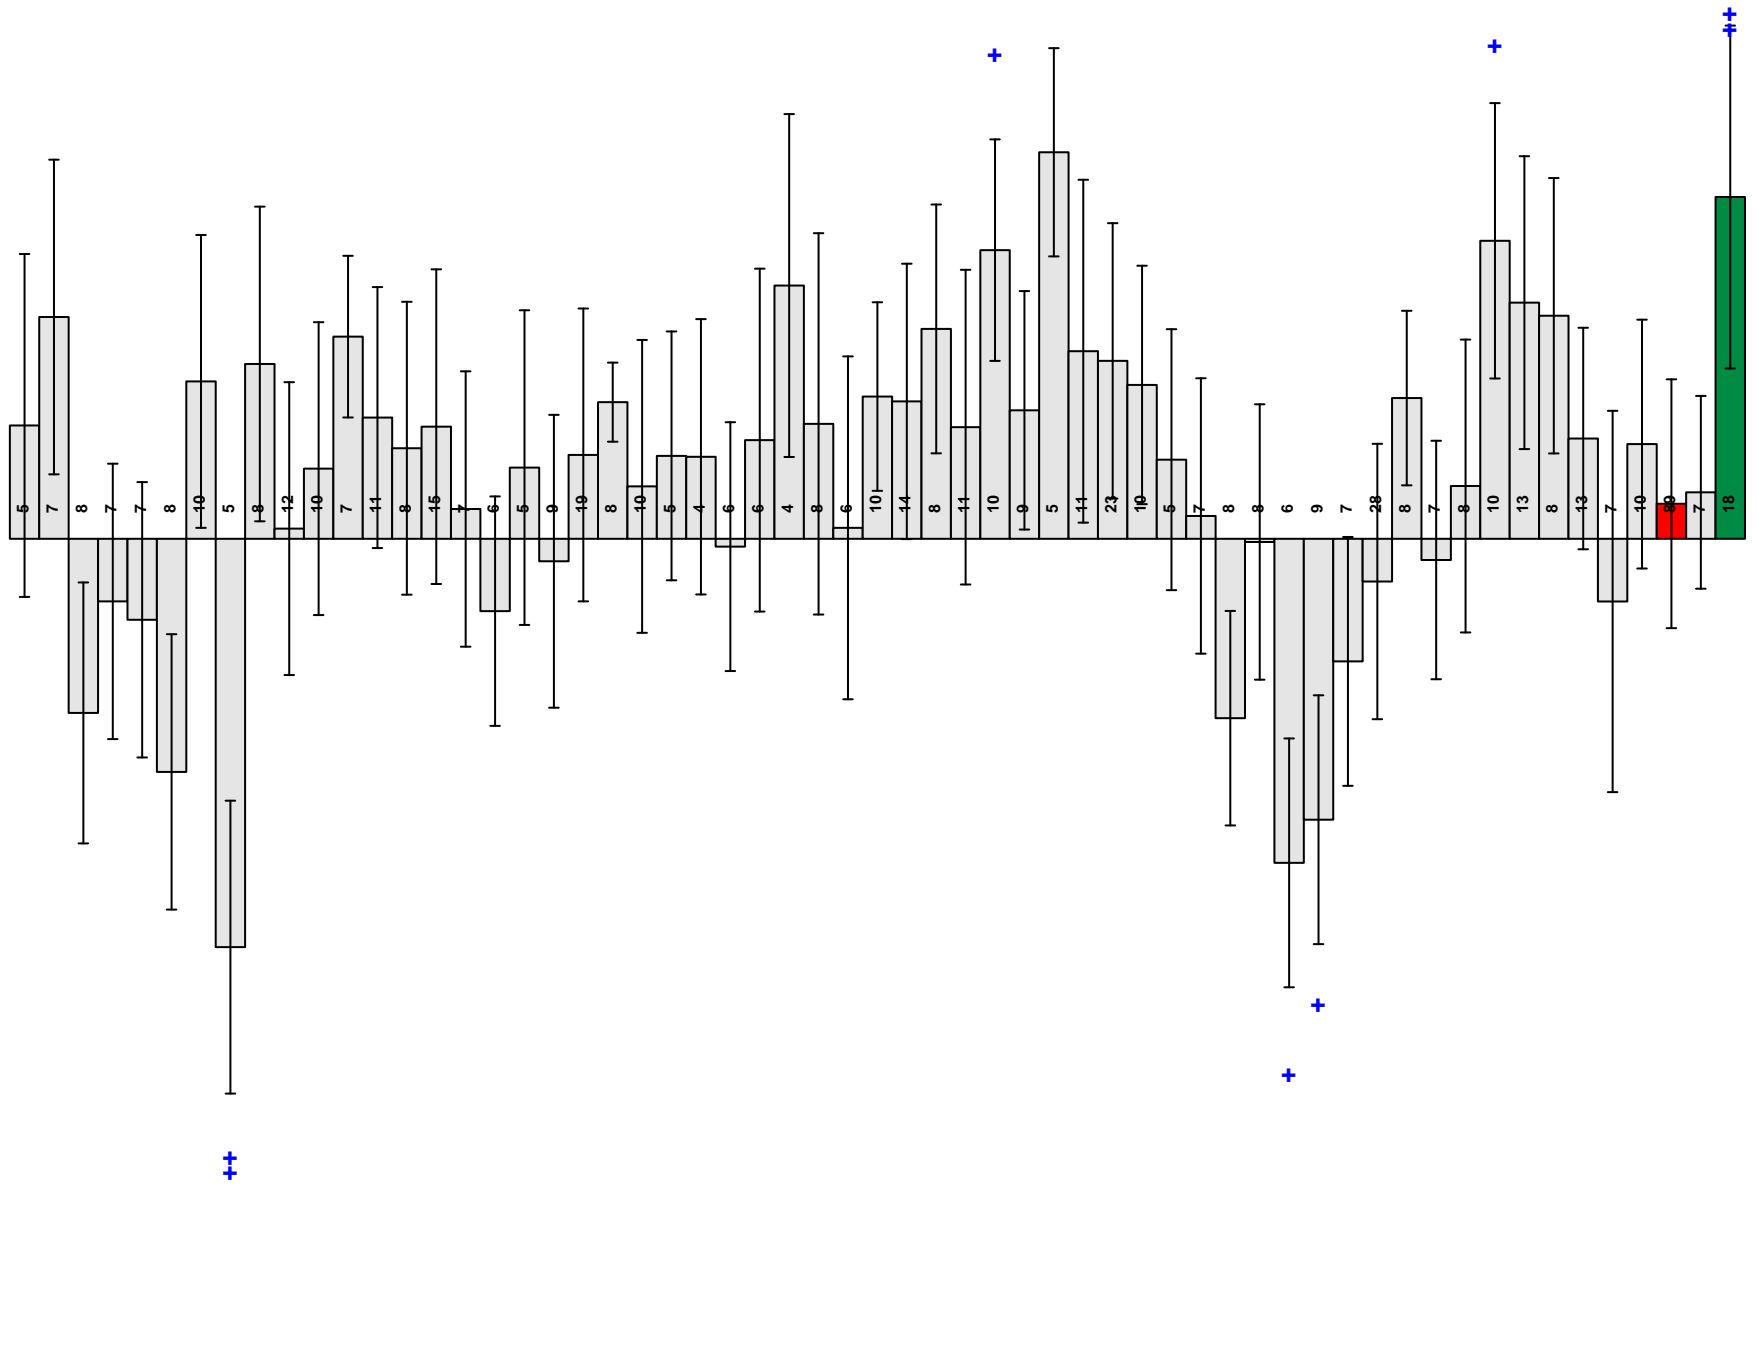

# Angle T5

degrees

30  
20  
10  
0  
-10  
-20

+ \* p < 0.05  
++ \*\* p < 0.01  
+++ \*\*\* p < 0.001

Data filtering: >= 4 roots/IL

Bars = std. err. (sigma) from lm/glht

IL10-1  
IL10-1-1  
IL10-2  
IL10-2-2  
IL10-3  
IL11-1  
IL11-2  
IL11-4  
IL11-4-1  
IL12-1  
IL12-1-1  
IL12-2  
IL12-3  
IL12-3-1  
IL12-4  
IL12-4-1  
IL1-1-2  
IL1-3  
IL1-4  
IL1-4-18  
IL2-1  
IL2-1-1  
IL2-2  
IL2-3  
IL2-4  
IL2-6-5  
IL3-1  
IL3-5  
IL4-1  
IL4-1-1  
IL4-3  
IL4-3-2  
IL4-4  
IL5-1  
IL5-2  
IL5-3  
IL5-5  
IL6-1  
IL6-2  
IL6-4  
IL7-1  
IL7-3  
IL7-4  
IL7-4-1  
IL7-5  
IL7-5-1  
IL7-5-5  
IL8-1  
IL8-1-1  
IL8-1-5  
IL8-3  
IL9-1  
IL9-1-2  
IL9-2  
IL9-2-6  
IL9-3-1  
M82  
IL7-5-P5  
PENN

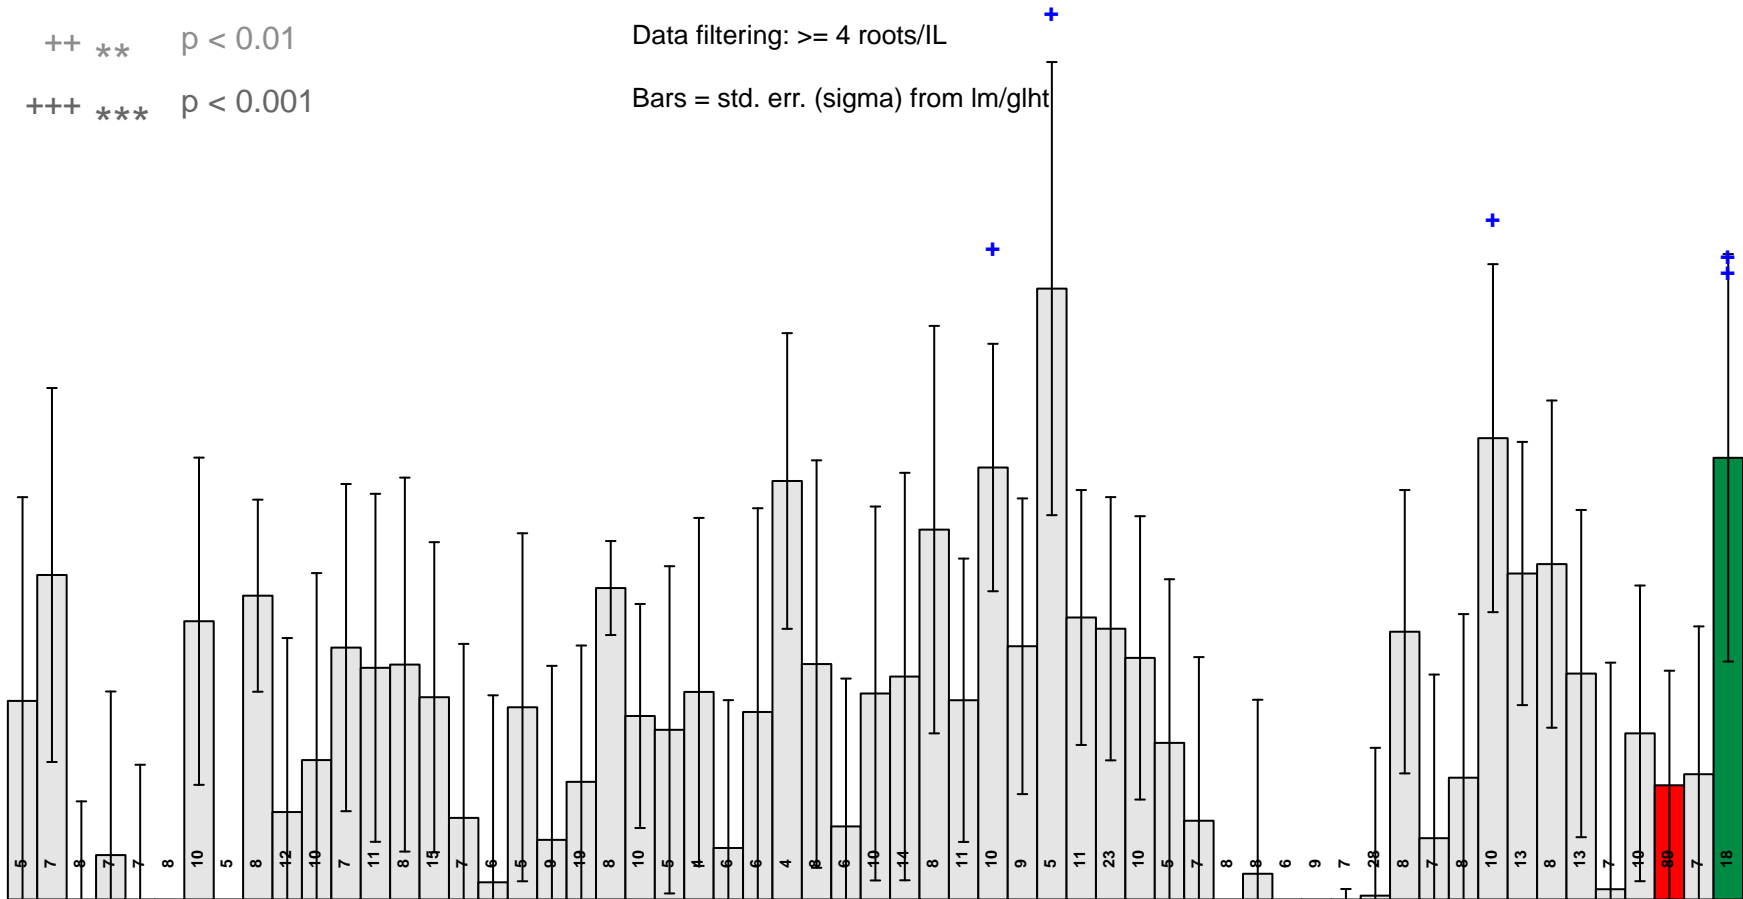

# Angle T6

degrees

40  
30  
20  
10  
0  
-10  
-20

+ \*  $p < 0.05$   
++ \*\*  $p < 0.01$   
+++ \*\*\*  $p < 0.001$

Data filtering:  $\geq 4$  roots/IL

Bars = std. err. (sigma) from lm/glht

IL10-1  
IL10-1-1  
IL10-2  
IL10-2-2  
IL10-3  
IL11-1  
IL11-2  
IL11-4  
IL11-4-1  
IL12-1  
IL12-1-1  
IL12-2  
IL12-3  
IL12-3-1  
IL12-4  
IL12-4-1  
IL1-1-2  
IL1-3  
IL1-4  
IL1-4-18  
IL2-1  
IL2-1-1  
IL2-2  
IL2-3  
IL2-4  
IL2-6-5  
IL3-1  
IL3-5  
IL4-1  
IL4-1-1  
IL4-3  
IL4-3-2  
IL4-4  
IL5-1  
IL5-2  
IL5-3  
IL5-5  
IL6-1  
IL6-2  
IL6-4  
IL7-1  
IL7-3  
IL7-4  
IL7-4-1  
IL7-5  
IL7-5-1  
IL7-5-5  
IL8-1  
IL8-1-1  
IL8-1-5  
IL8-3  
IL9-1  
IL9-1-2  
IL9-2  
IL9-2-6  
IL9-3-1  
M82  
IL7-5-P5  
PENN

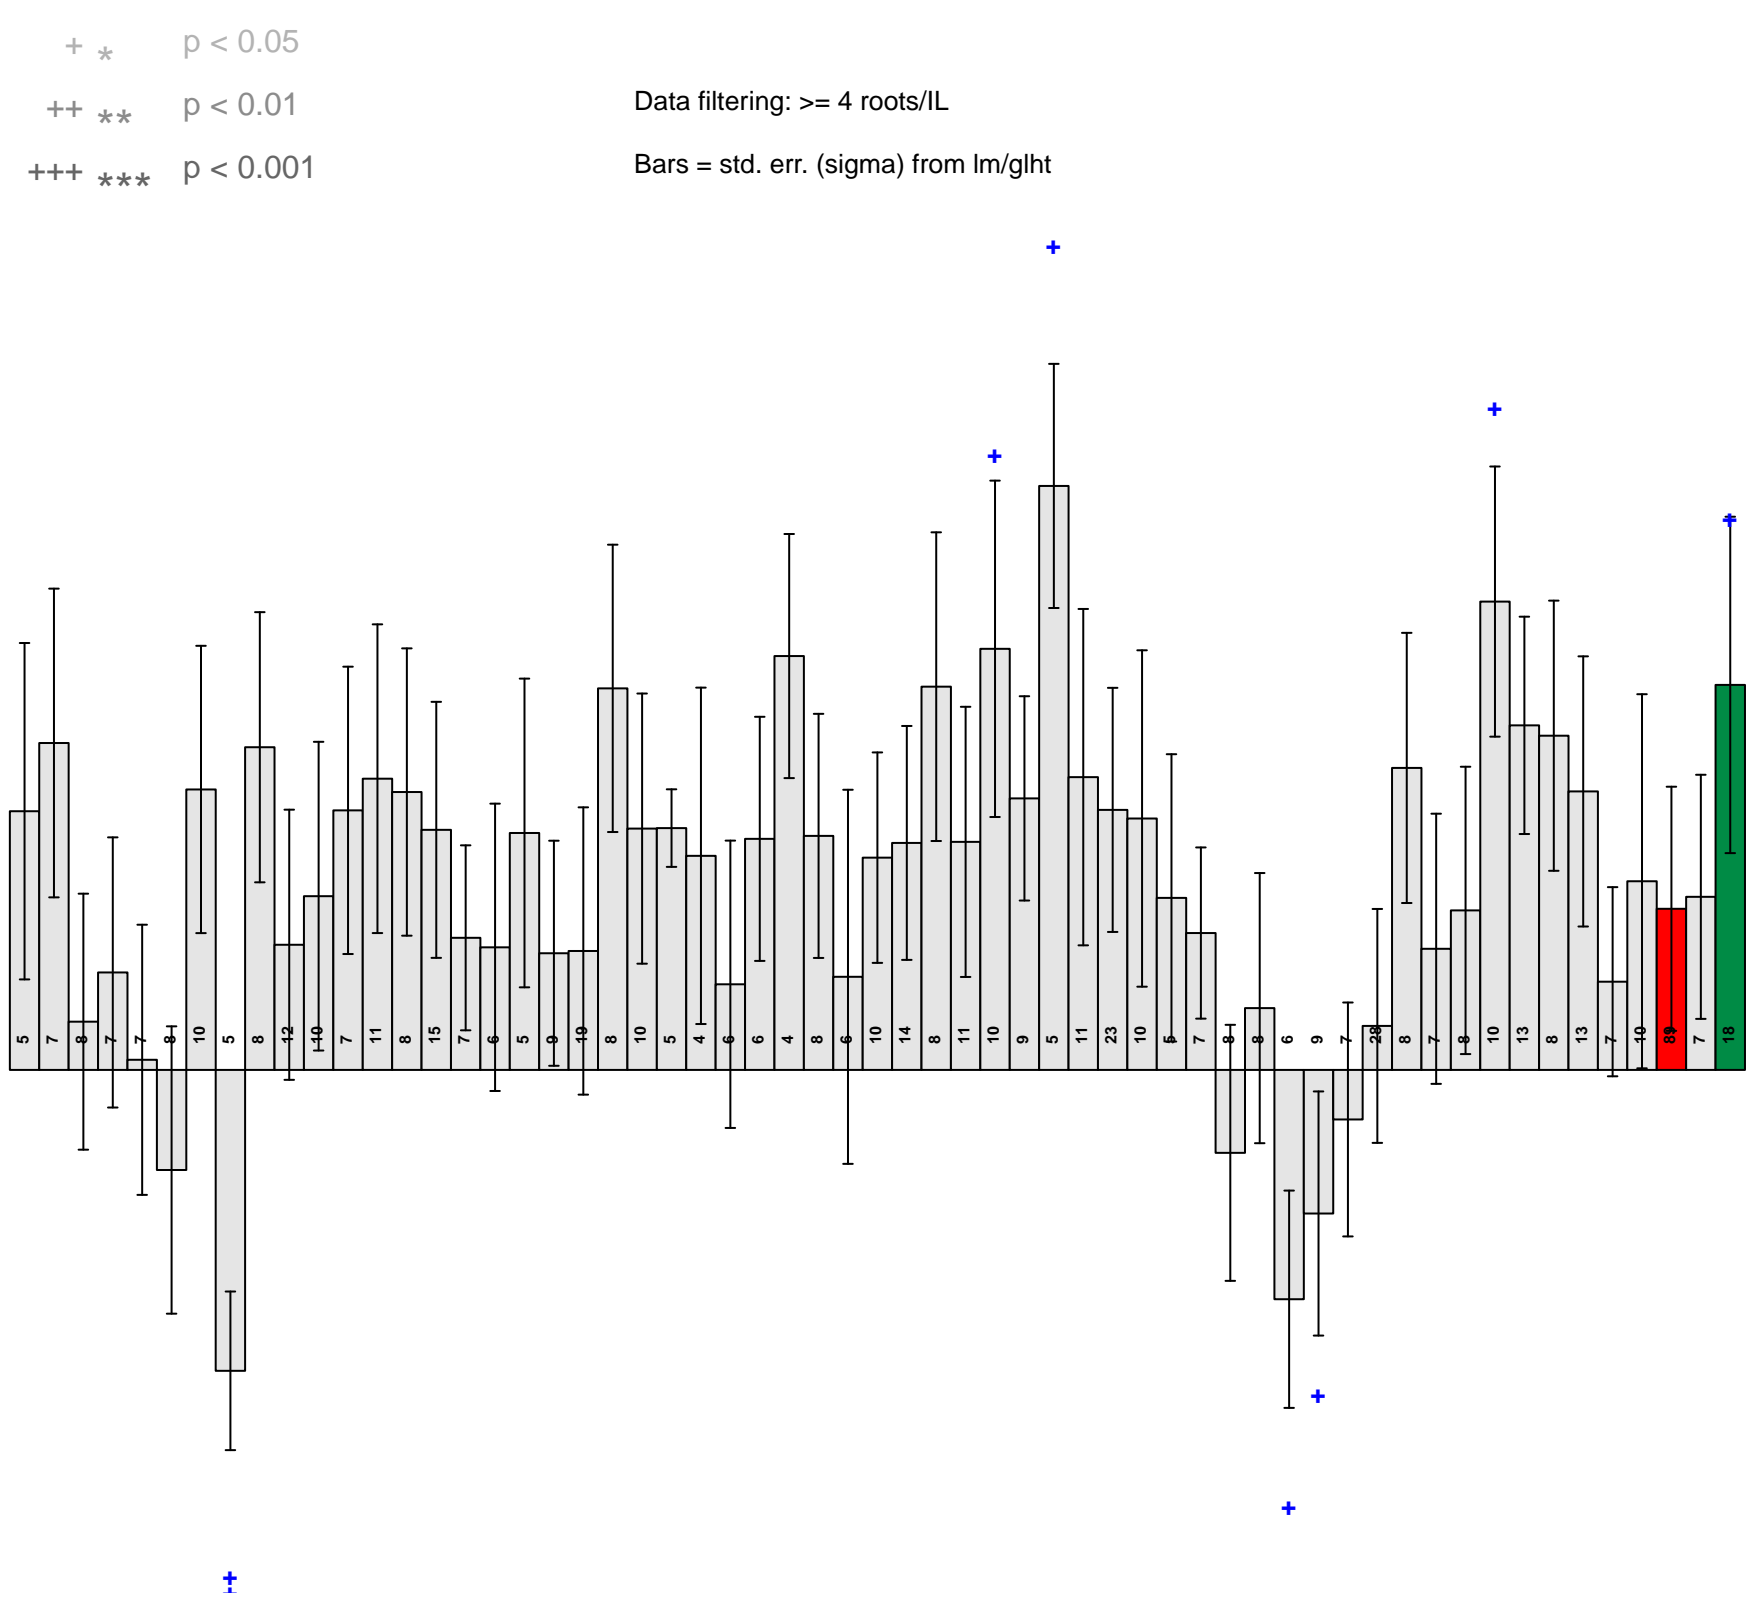

# Angle T7

degrees

40  
30  
20  
10  
0  
-10  
-20

+ \* p < 0.05  
++ \*\* p < 0.01  
+++ \*\*\* p < 0.001

Data filtering: >= 4 roots/IL

Bars = std. err. (sigma) from lm/glht

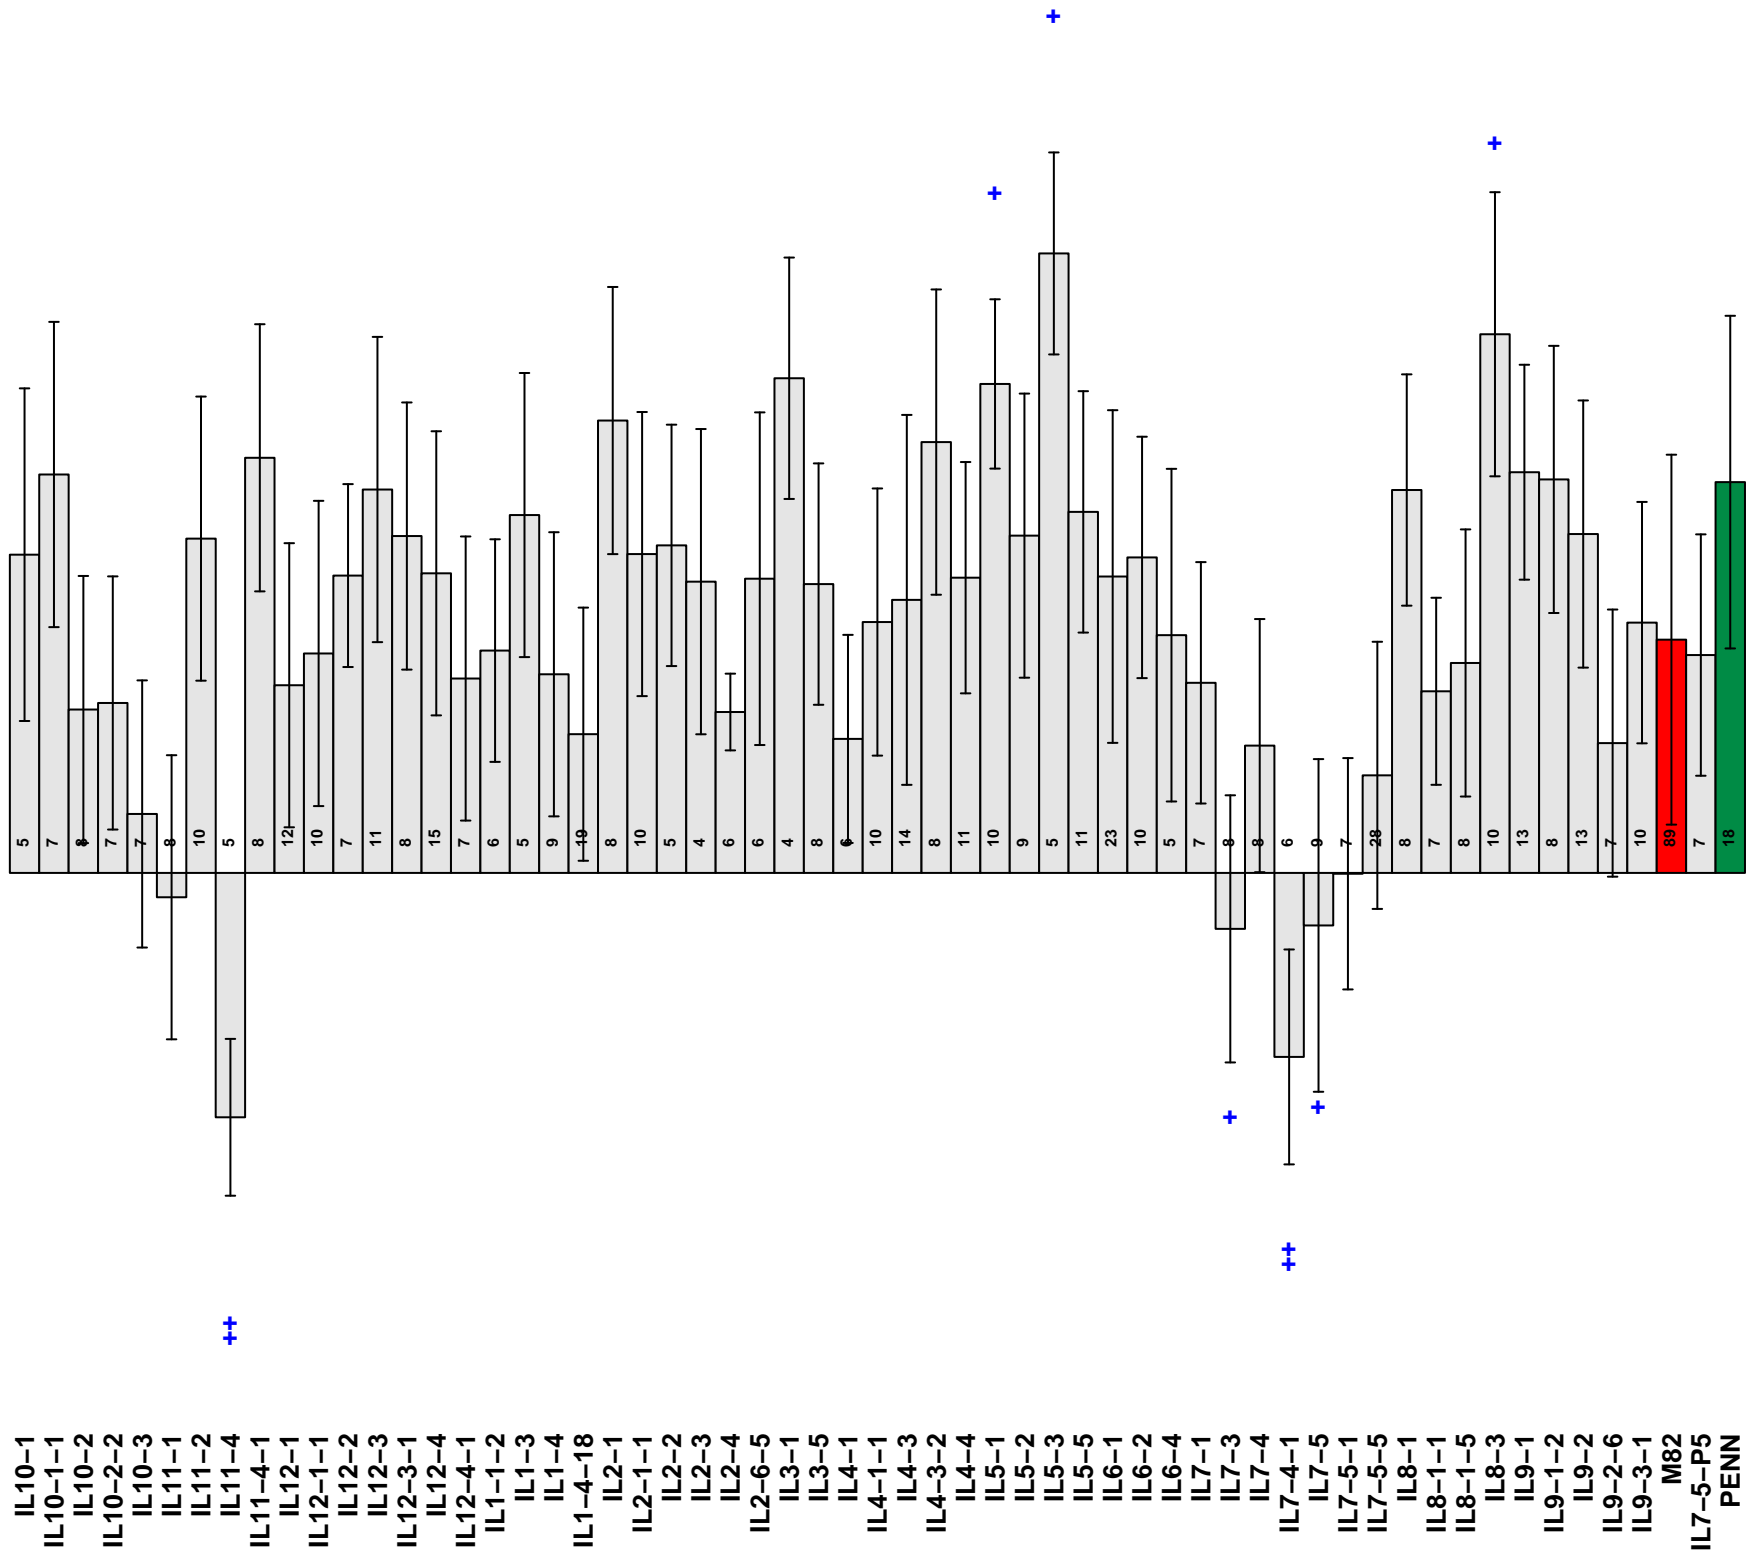



Angle T8

+ \*    p < 0.05  
++ \*\*    p < 0.01  
+++ \*\*\*    p < 0.001

Data filtering: >= 4 roots/IL

Bars = std. err. (sigma) from lm/glht

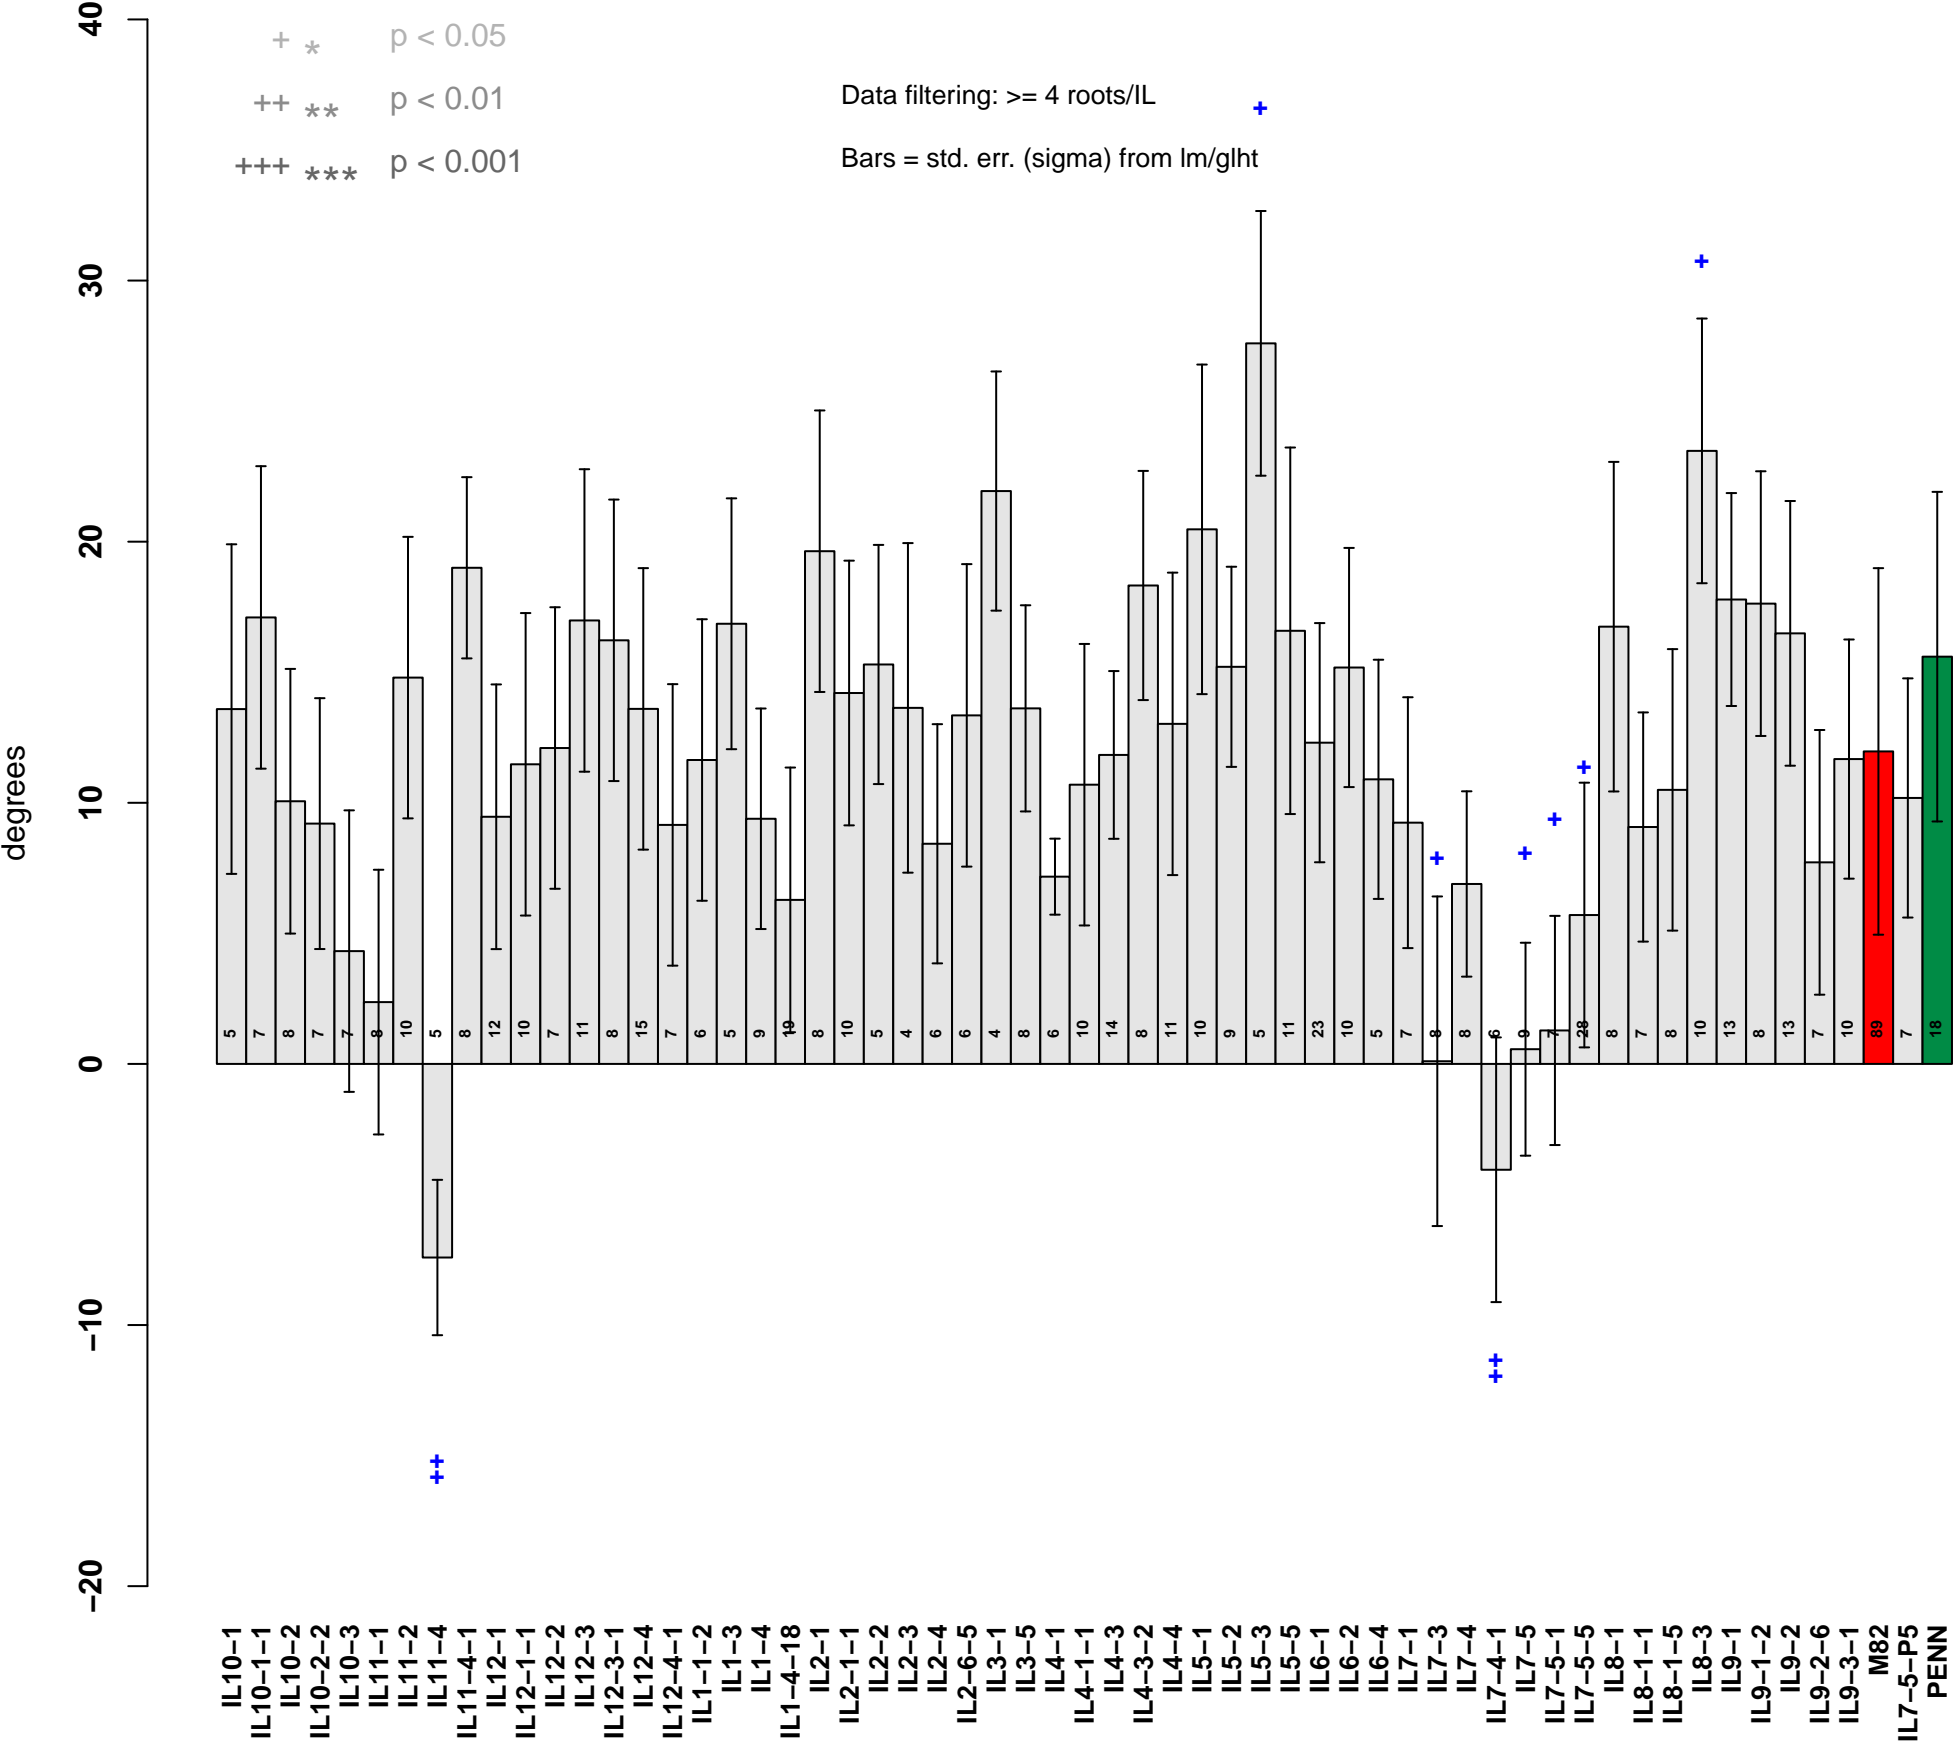

# Angle T9

degrees

50  
40  
30  
20  
10  
0  
-10

+ \*  $p < 0.05$   
++ \*\*  $p < 0.01$   
+++ \*\*\*  $p < 0.001$

Data filtering:  $\geq 4$  roots/IL

Bars = std. err. (sigma) from lm/glht

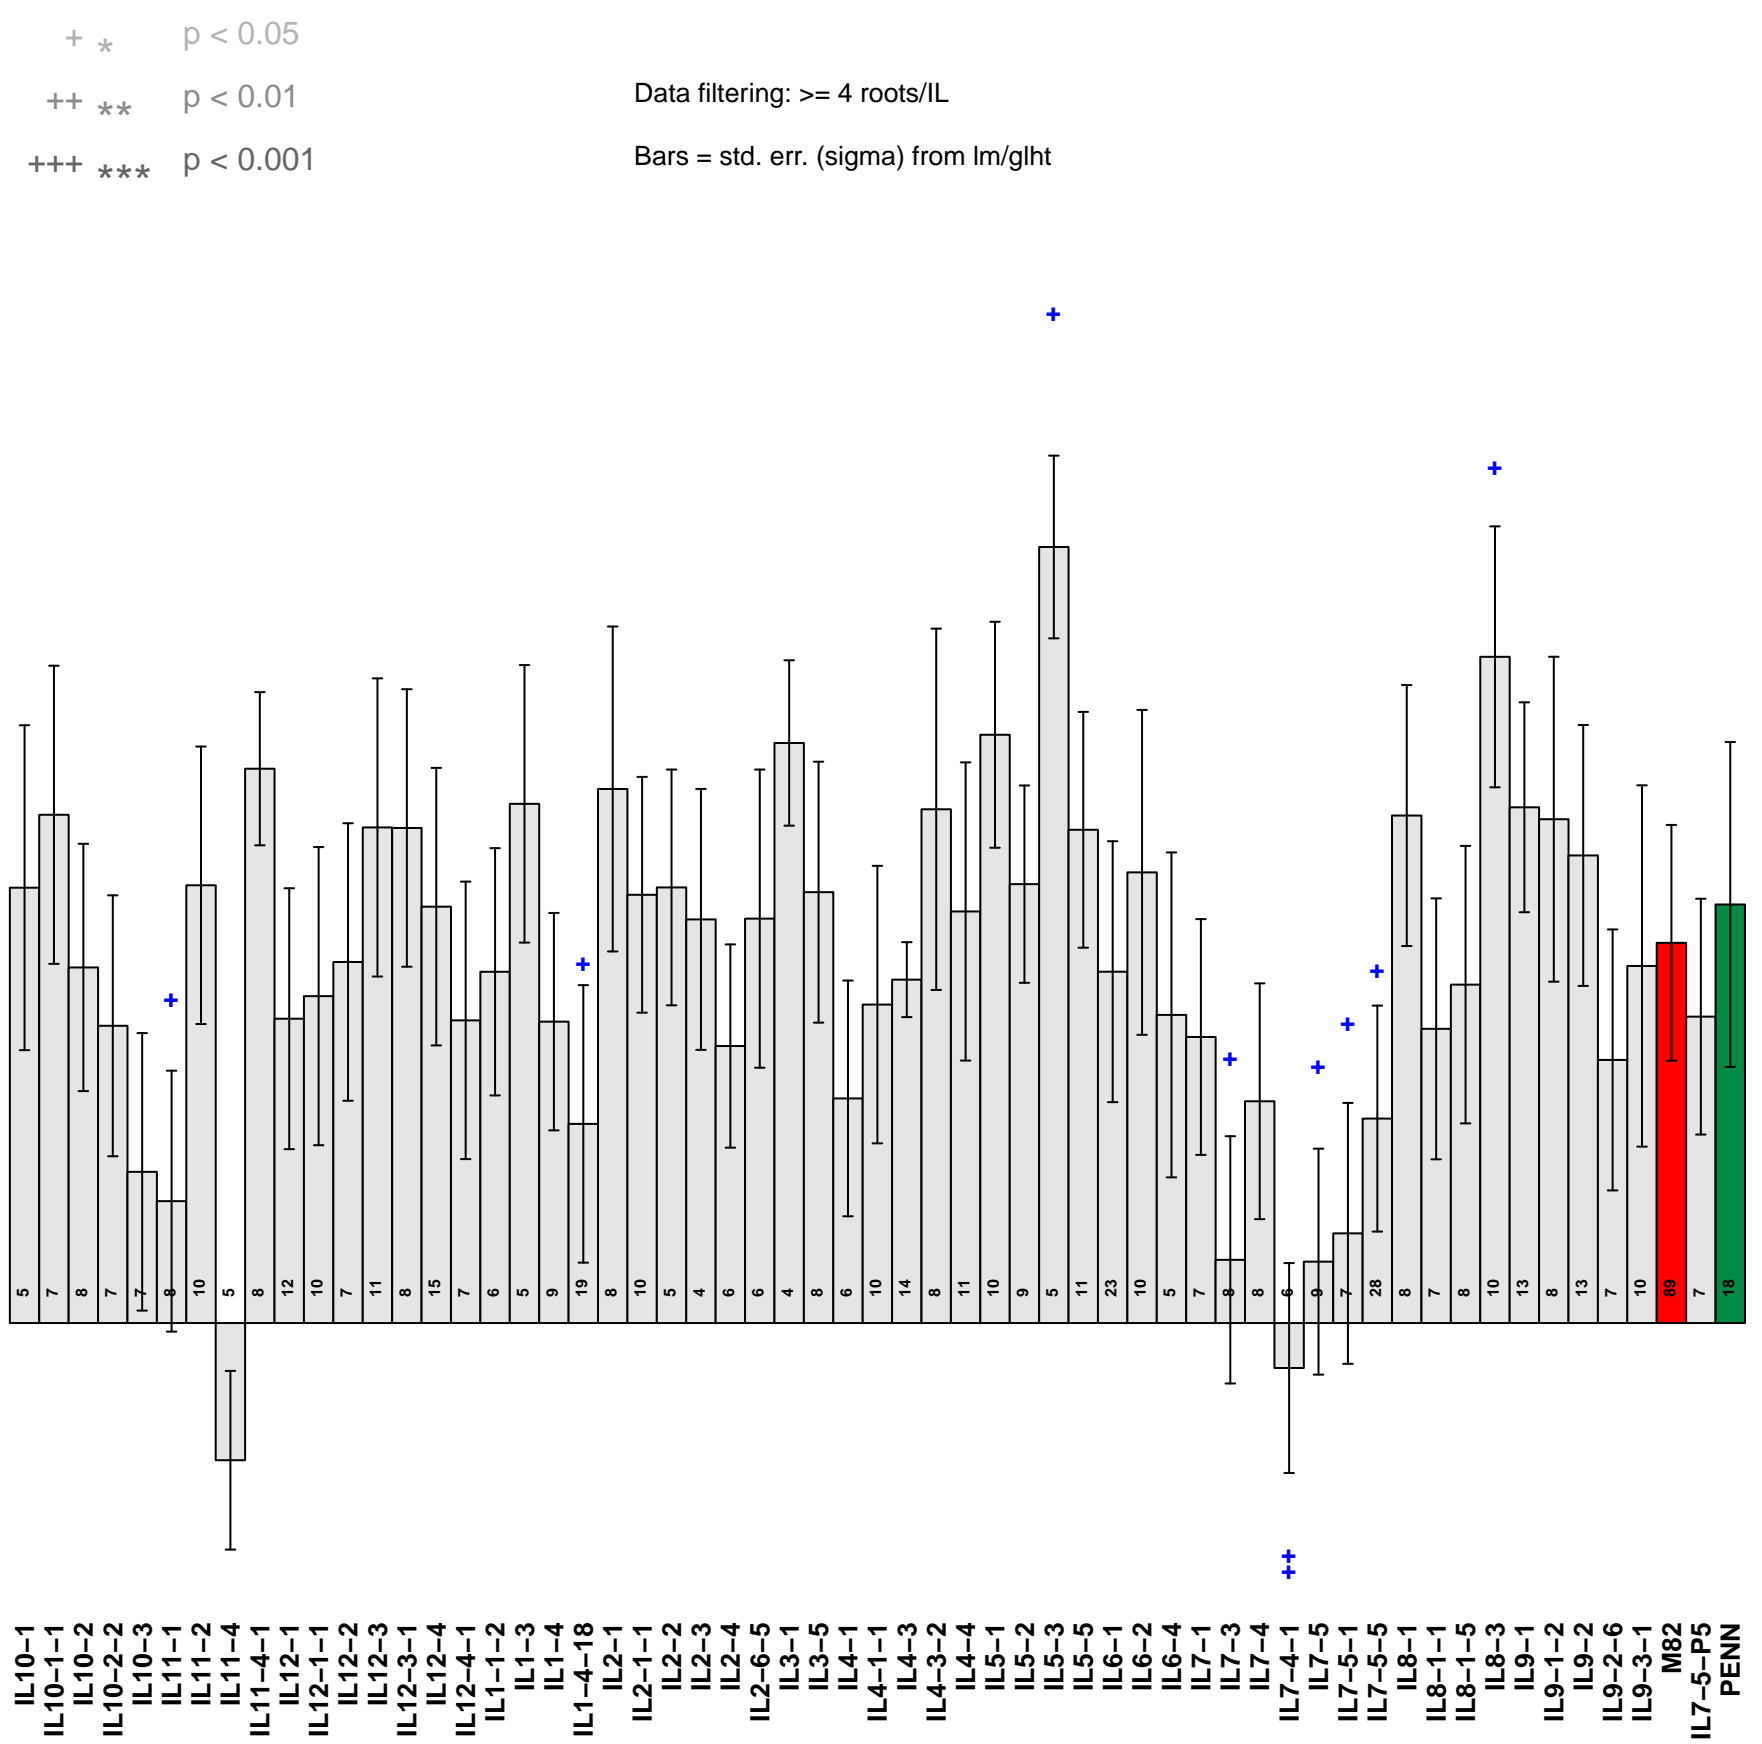

# Angle T10

degrees

50  
40  
30  
20  
10  
0  
-10

+ \*  $p < 0.05$   
++ \*\*  $p < 0.01$   
+++ \*\*\*  $p < 0.001$

Data filtering:  $\geq 4$  roots/IL

Bars = std. err. (sigma) from lm/glht

IL10-1  
IL10-1-1  
IL10-2  
IL10-2-2  
IL10-3  
IL11-1  
IL11-2  
IL11-4  
IL11-4-1  
IL12-1  
IL12-1-1  
IL12-2  
IL12-3  
IL12-3-1  
IL12-4  
IL12-4-1  
IL1-1-2  
IL1-3  
IL1-4  
IL1-4-18  
IL2-1  
IL2-1-1  
IL2-2  
IL2-3  
IL2-4  
IL2-6-5  
IL3-1  
IL3-5  
IL4-1  
IL4-1-1  
IL4-3  
IL4-3-2  
IL4-4  
IL5-1  
IL5-2  
IL5-3  
IL5-5  
IL6-1  
IL6-2  
IL6-4  
IL7-1  
IL7-3  
IL7-4  
IL7-4-1  
IL7-5  
IL7-5-1  
IL7-5-5  
IL8-1  
IL8-1-1  
IL8-1-5  
IL8-3  
IL9-1  
IL9-1-2  
IL9-2  
IL9-2-6  
IL9-3-1  
M82  
IL7-5-P5  
PENN

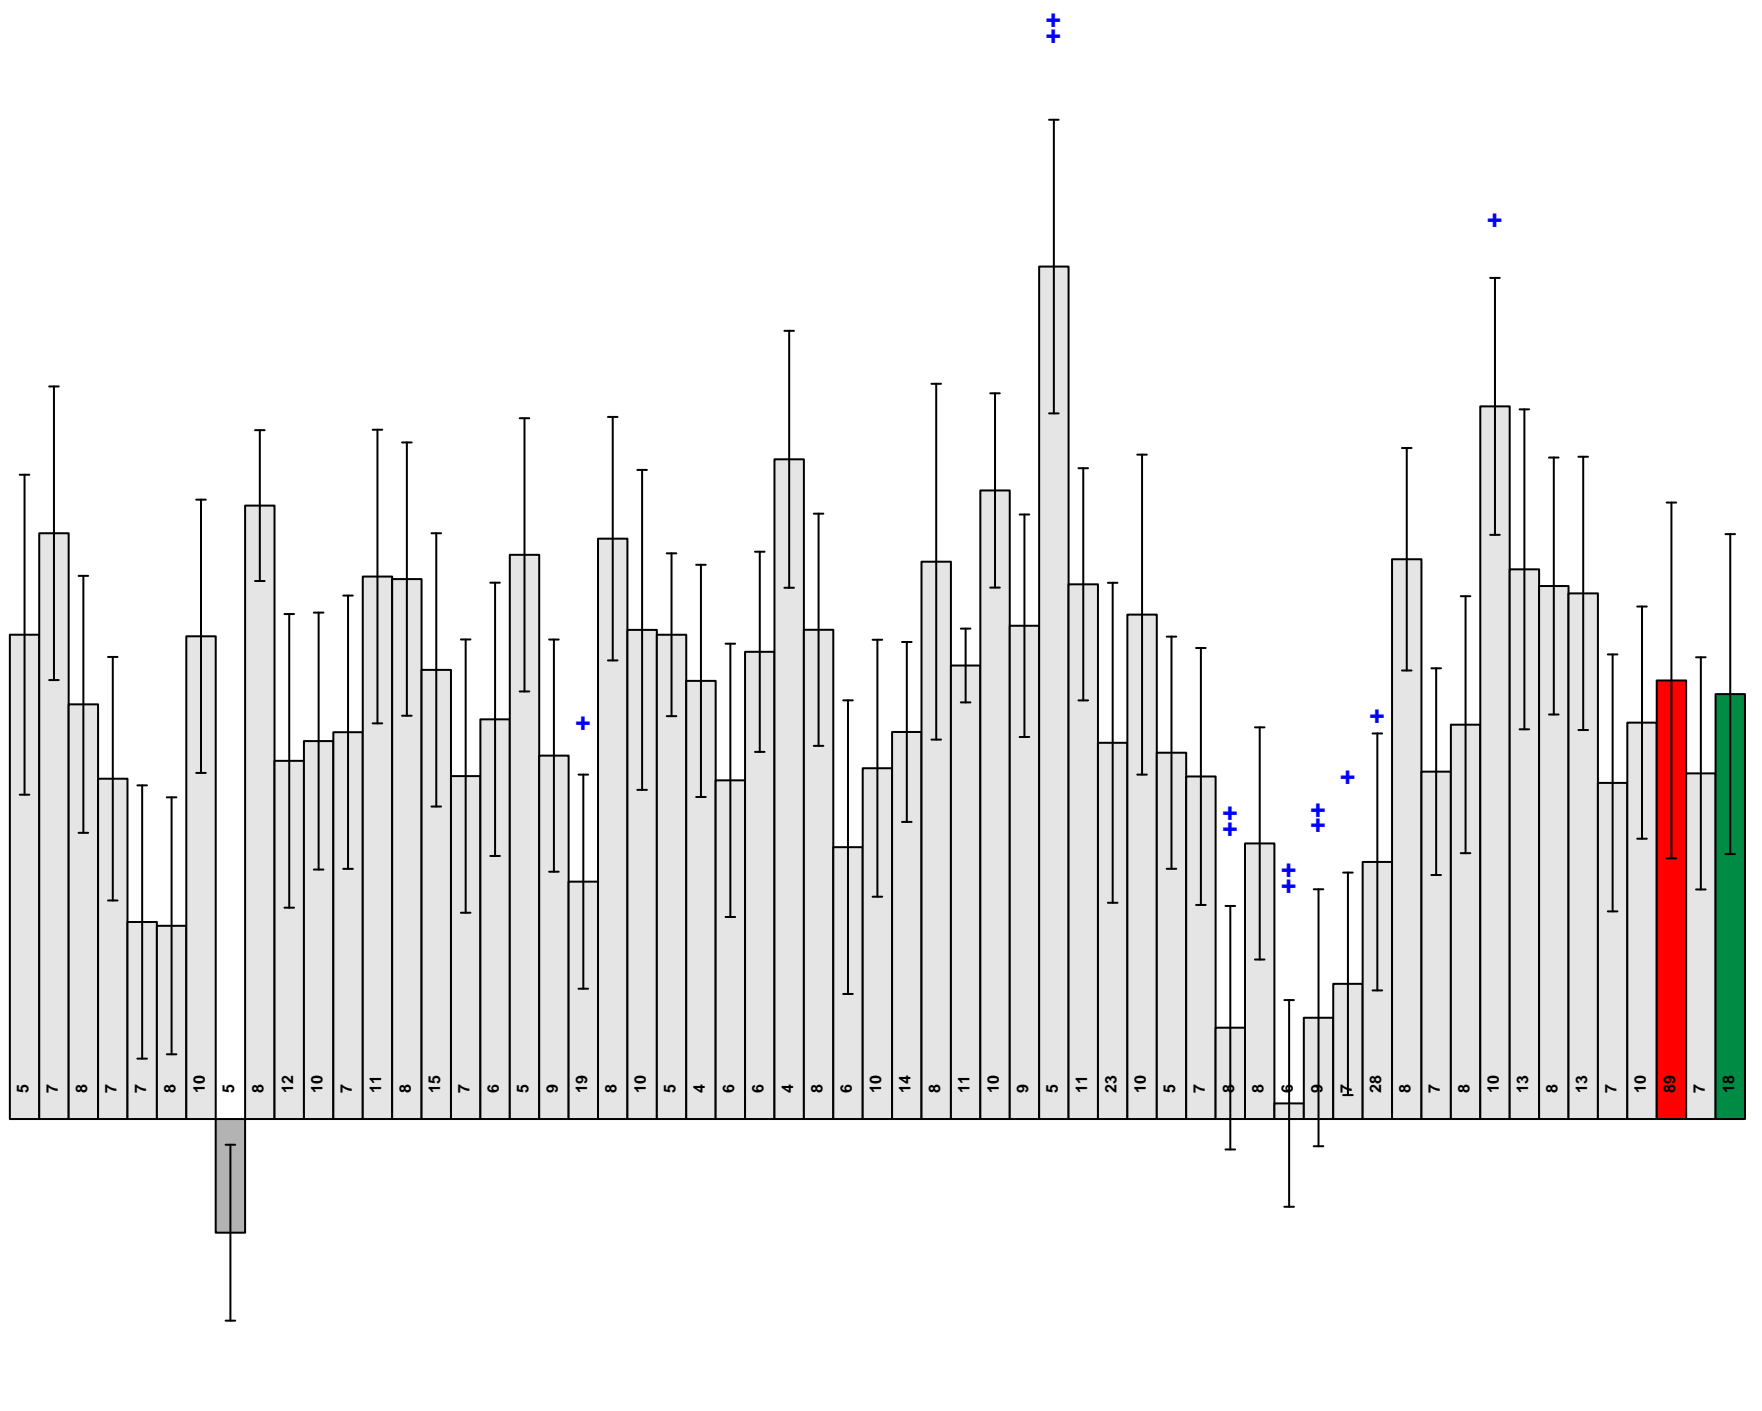

# Angle T11

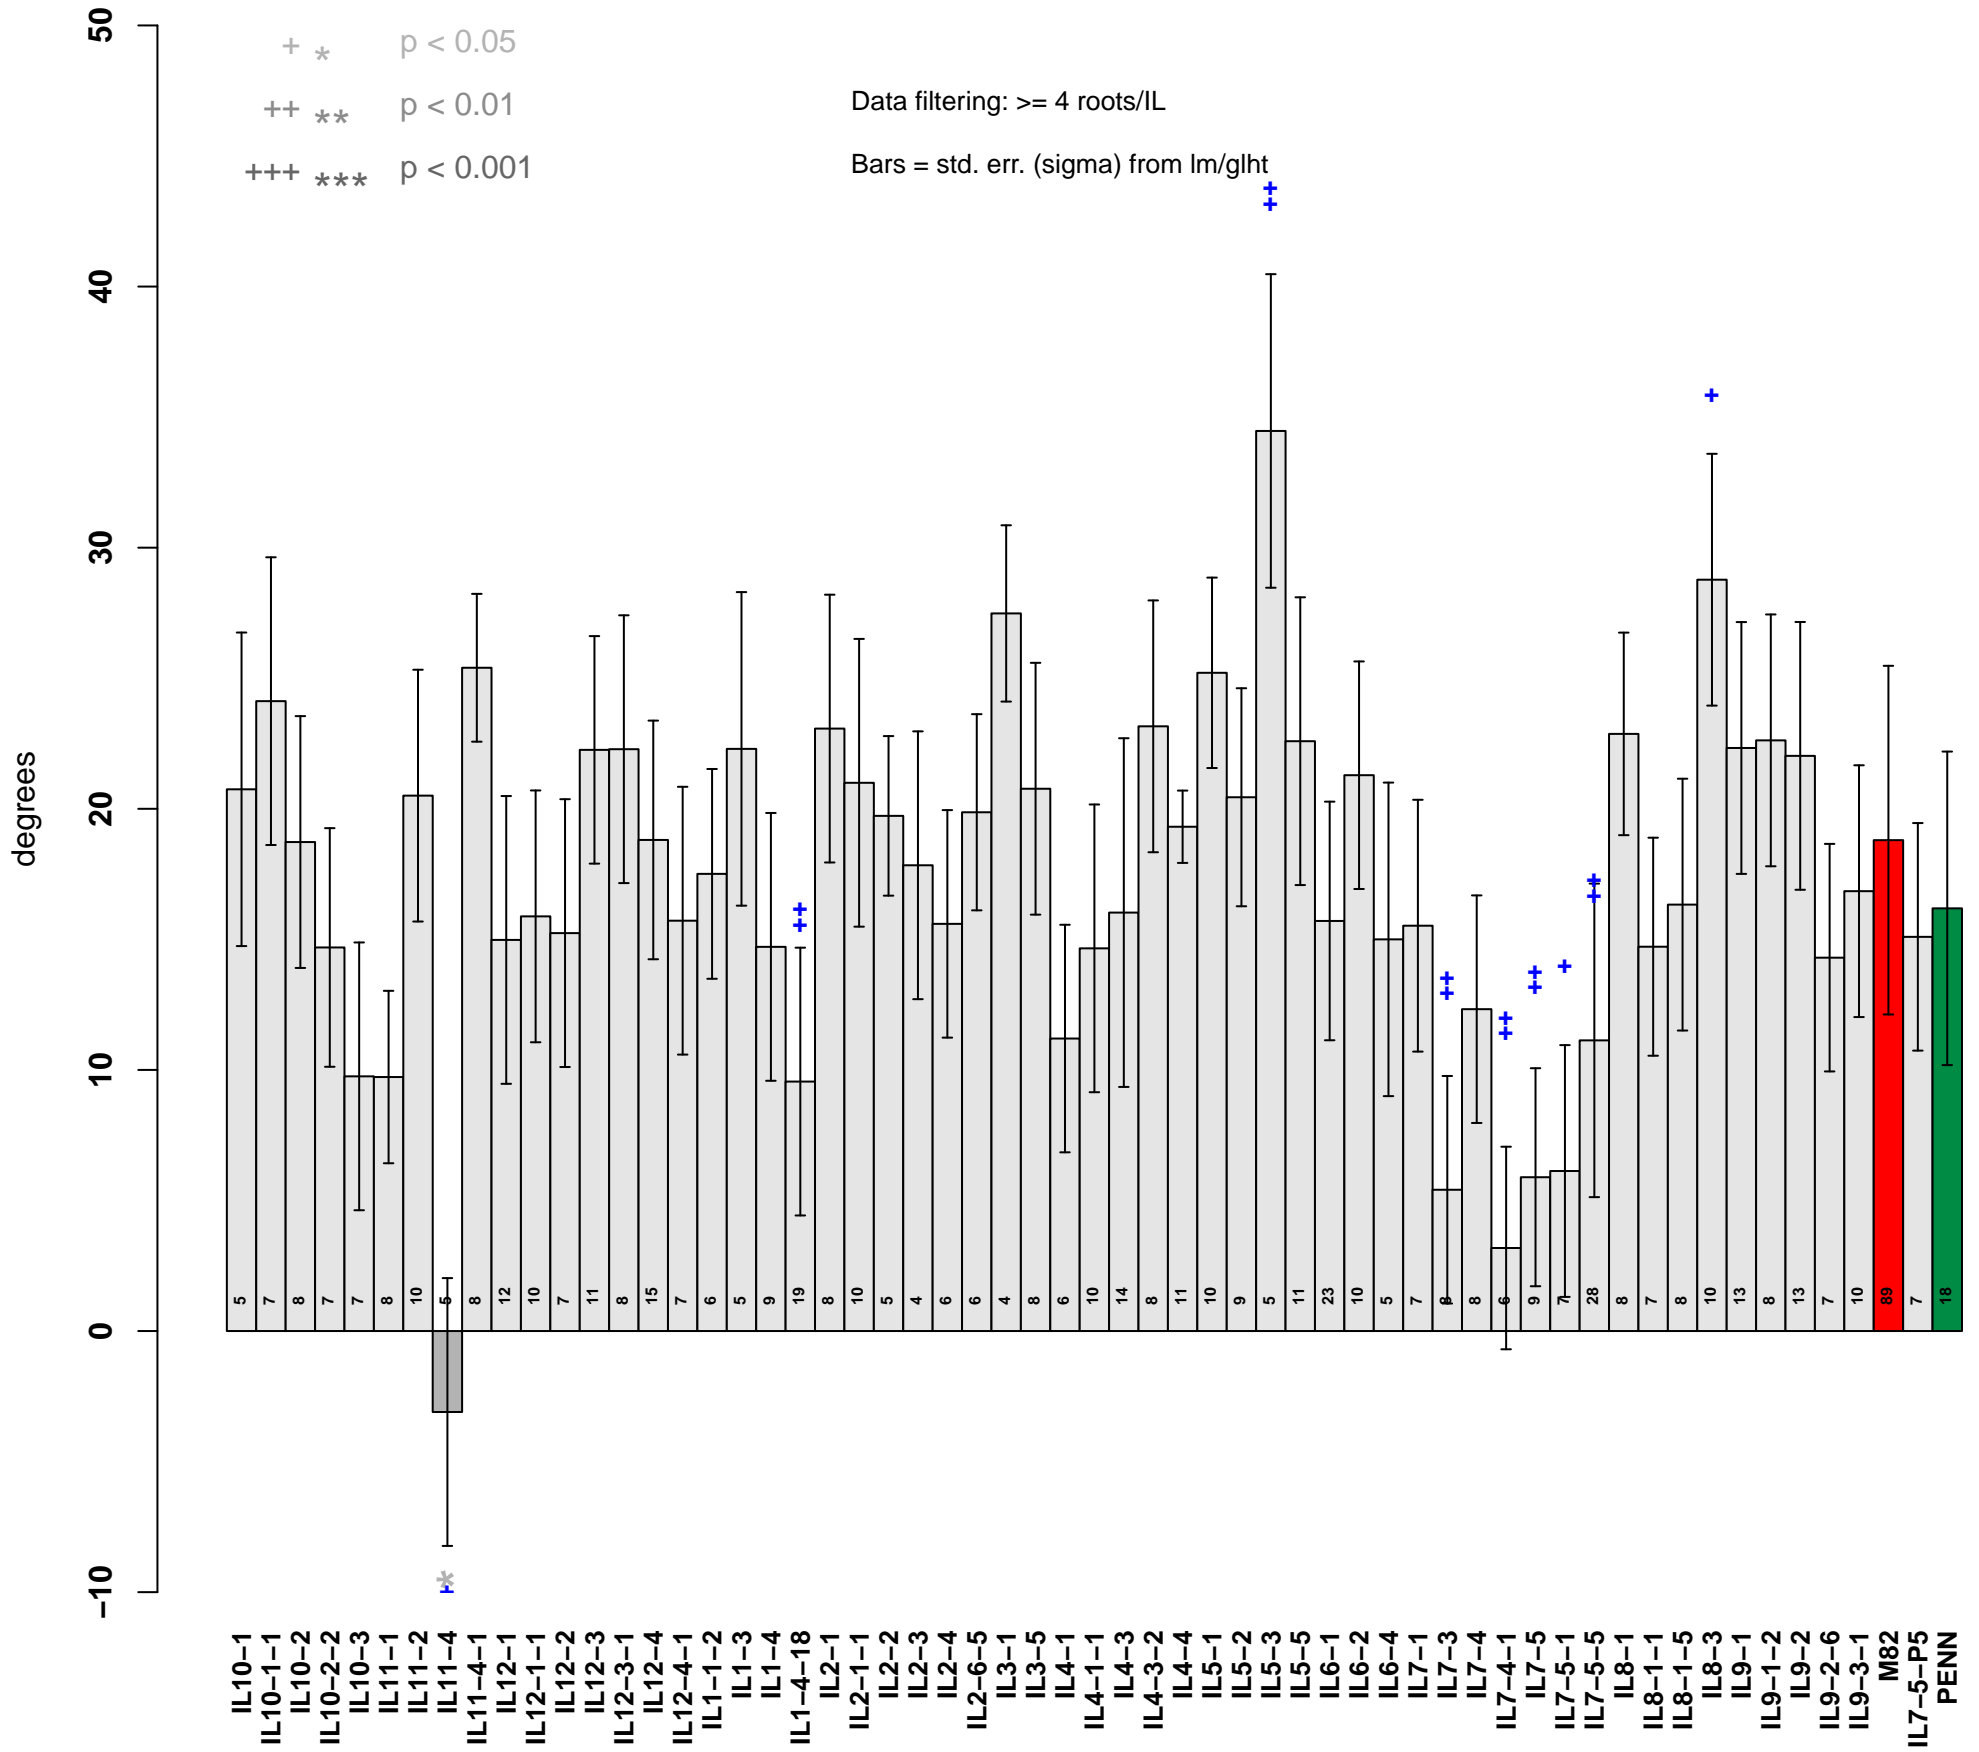

# Angle T12

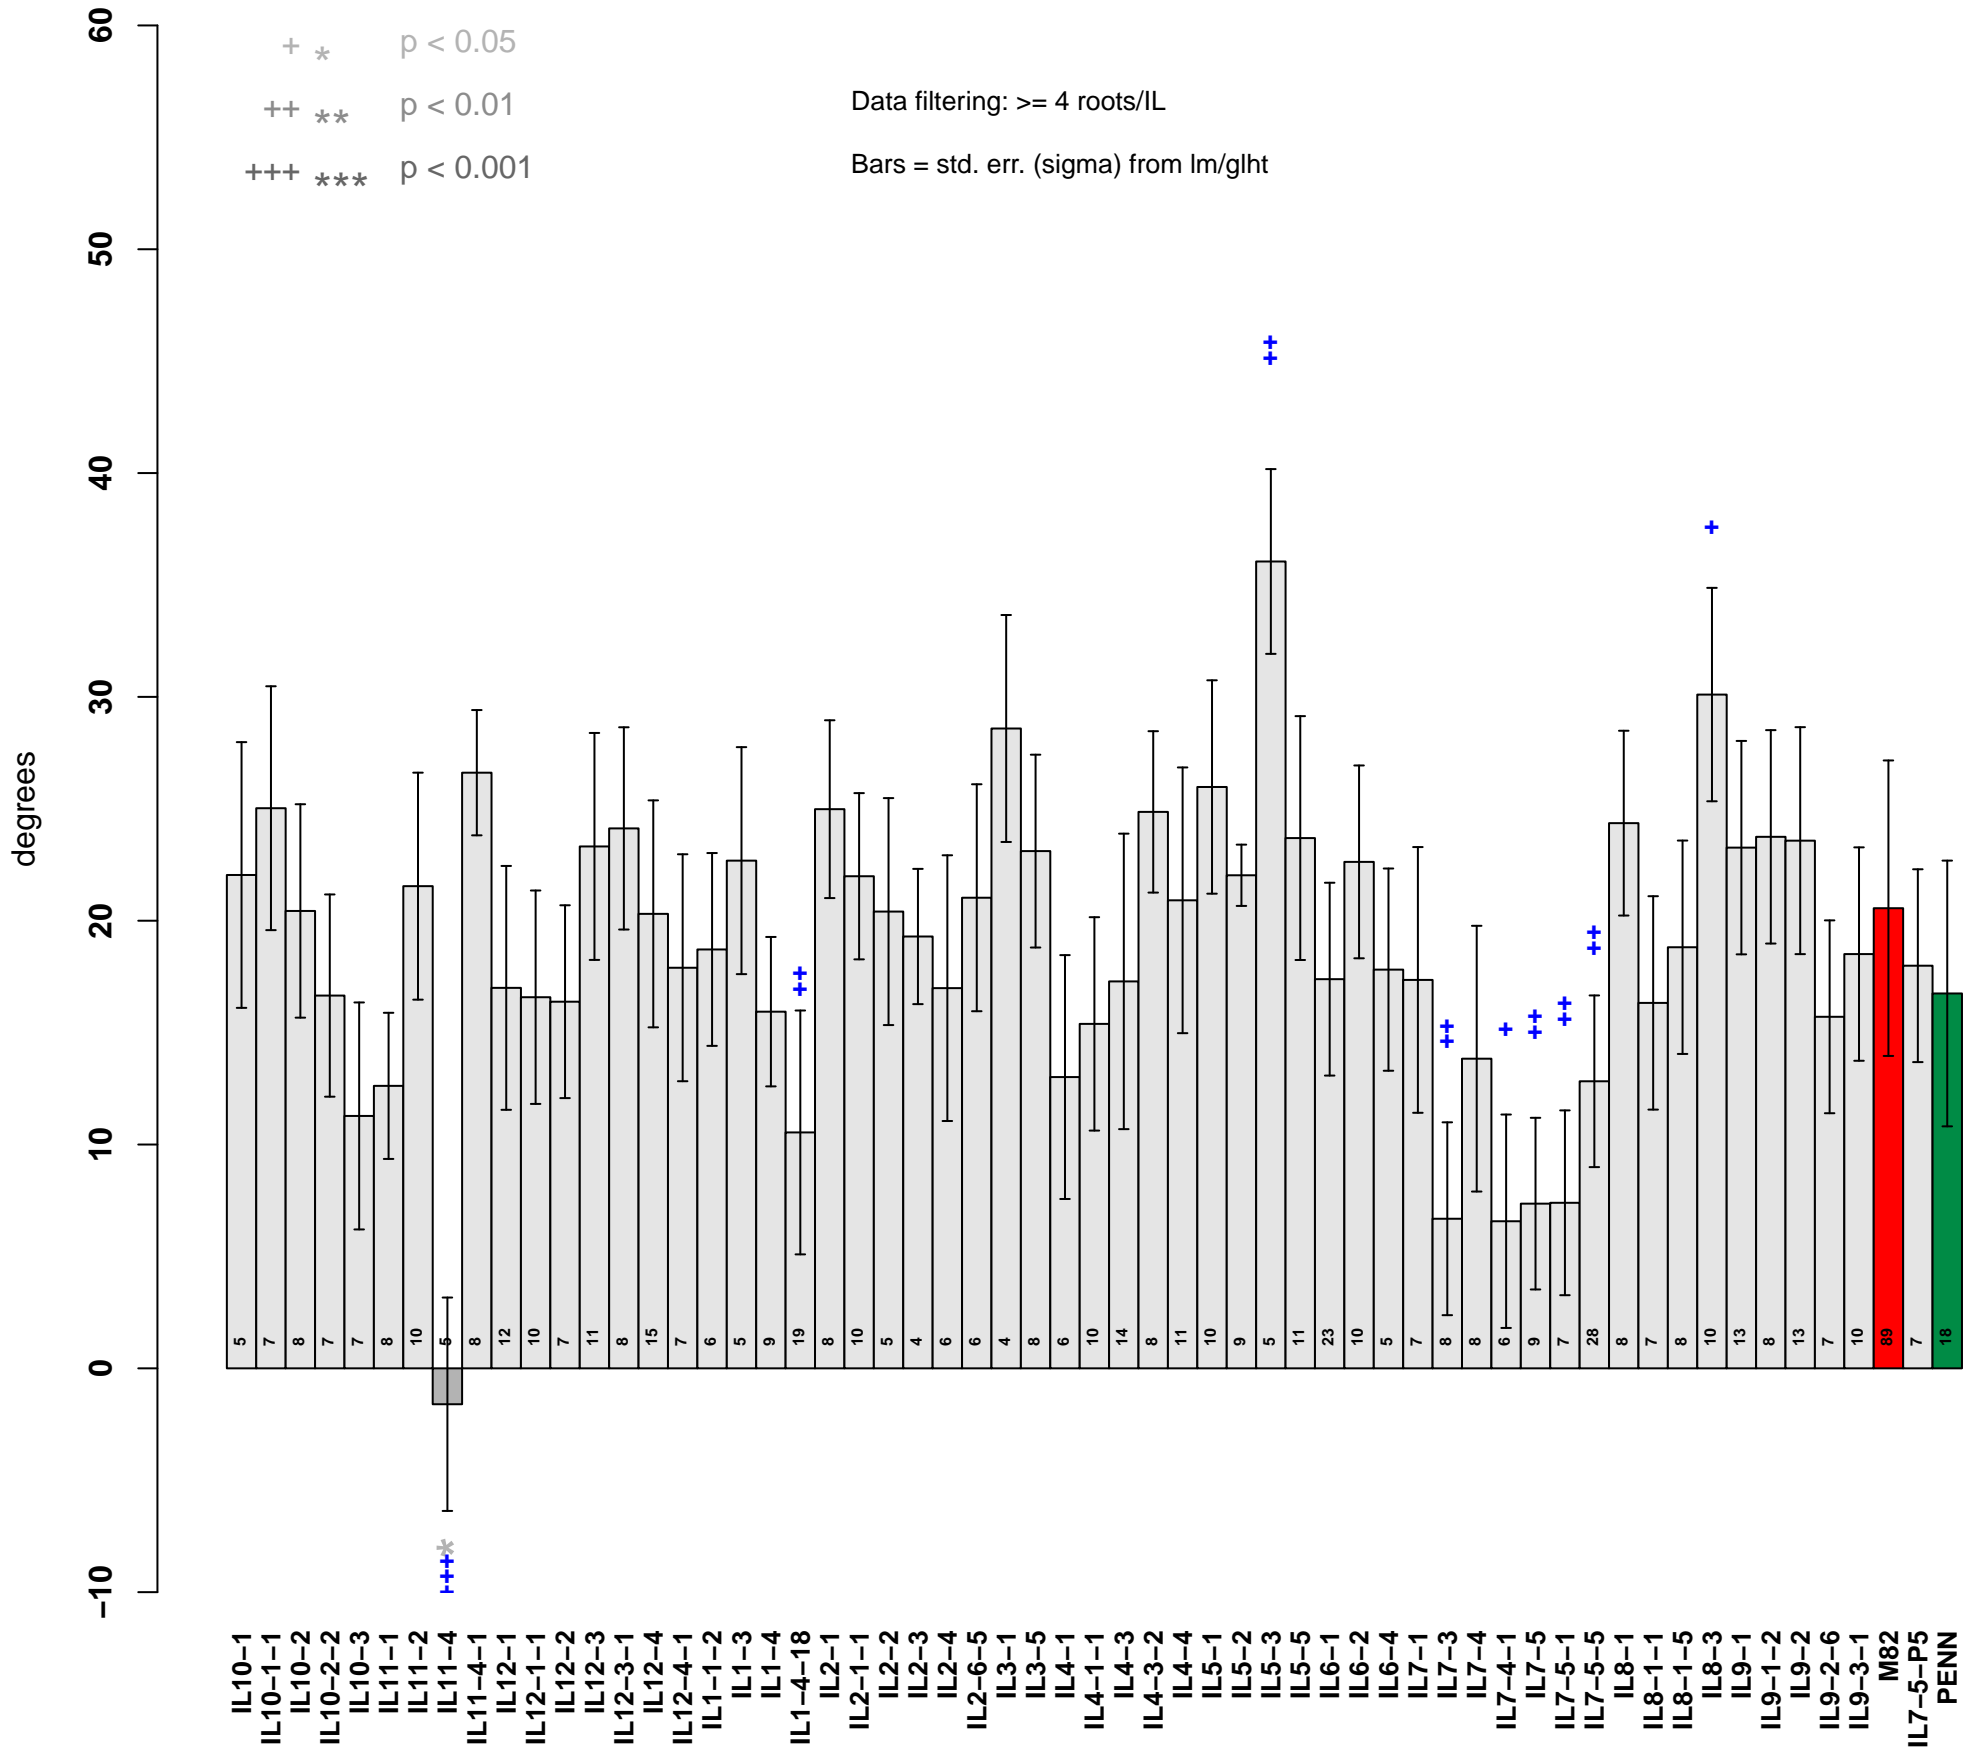

# Angle T13

degrees

60  
50  
40  
30  
20  
10  
0

+ \*  $p < 0.05$   
++ \*\*  $p < 0.01$   
+++ \*\*\*  $p < 0.001$

Data filtering:  $\geq 4$  roots/IL

Bars = std. err. (sigma) from lm/glht

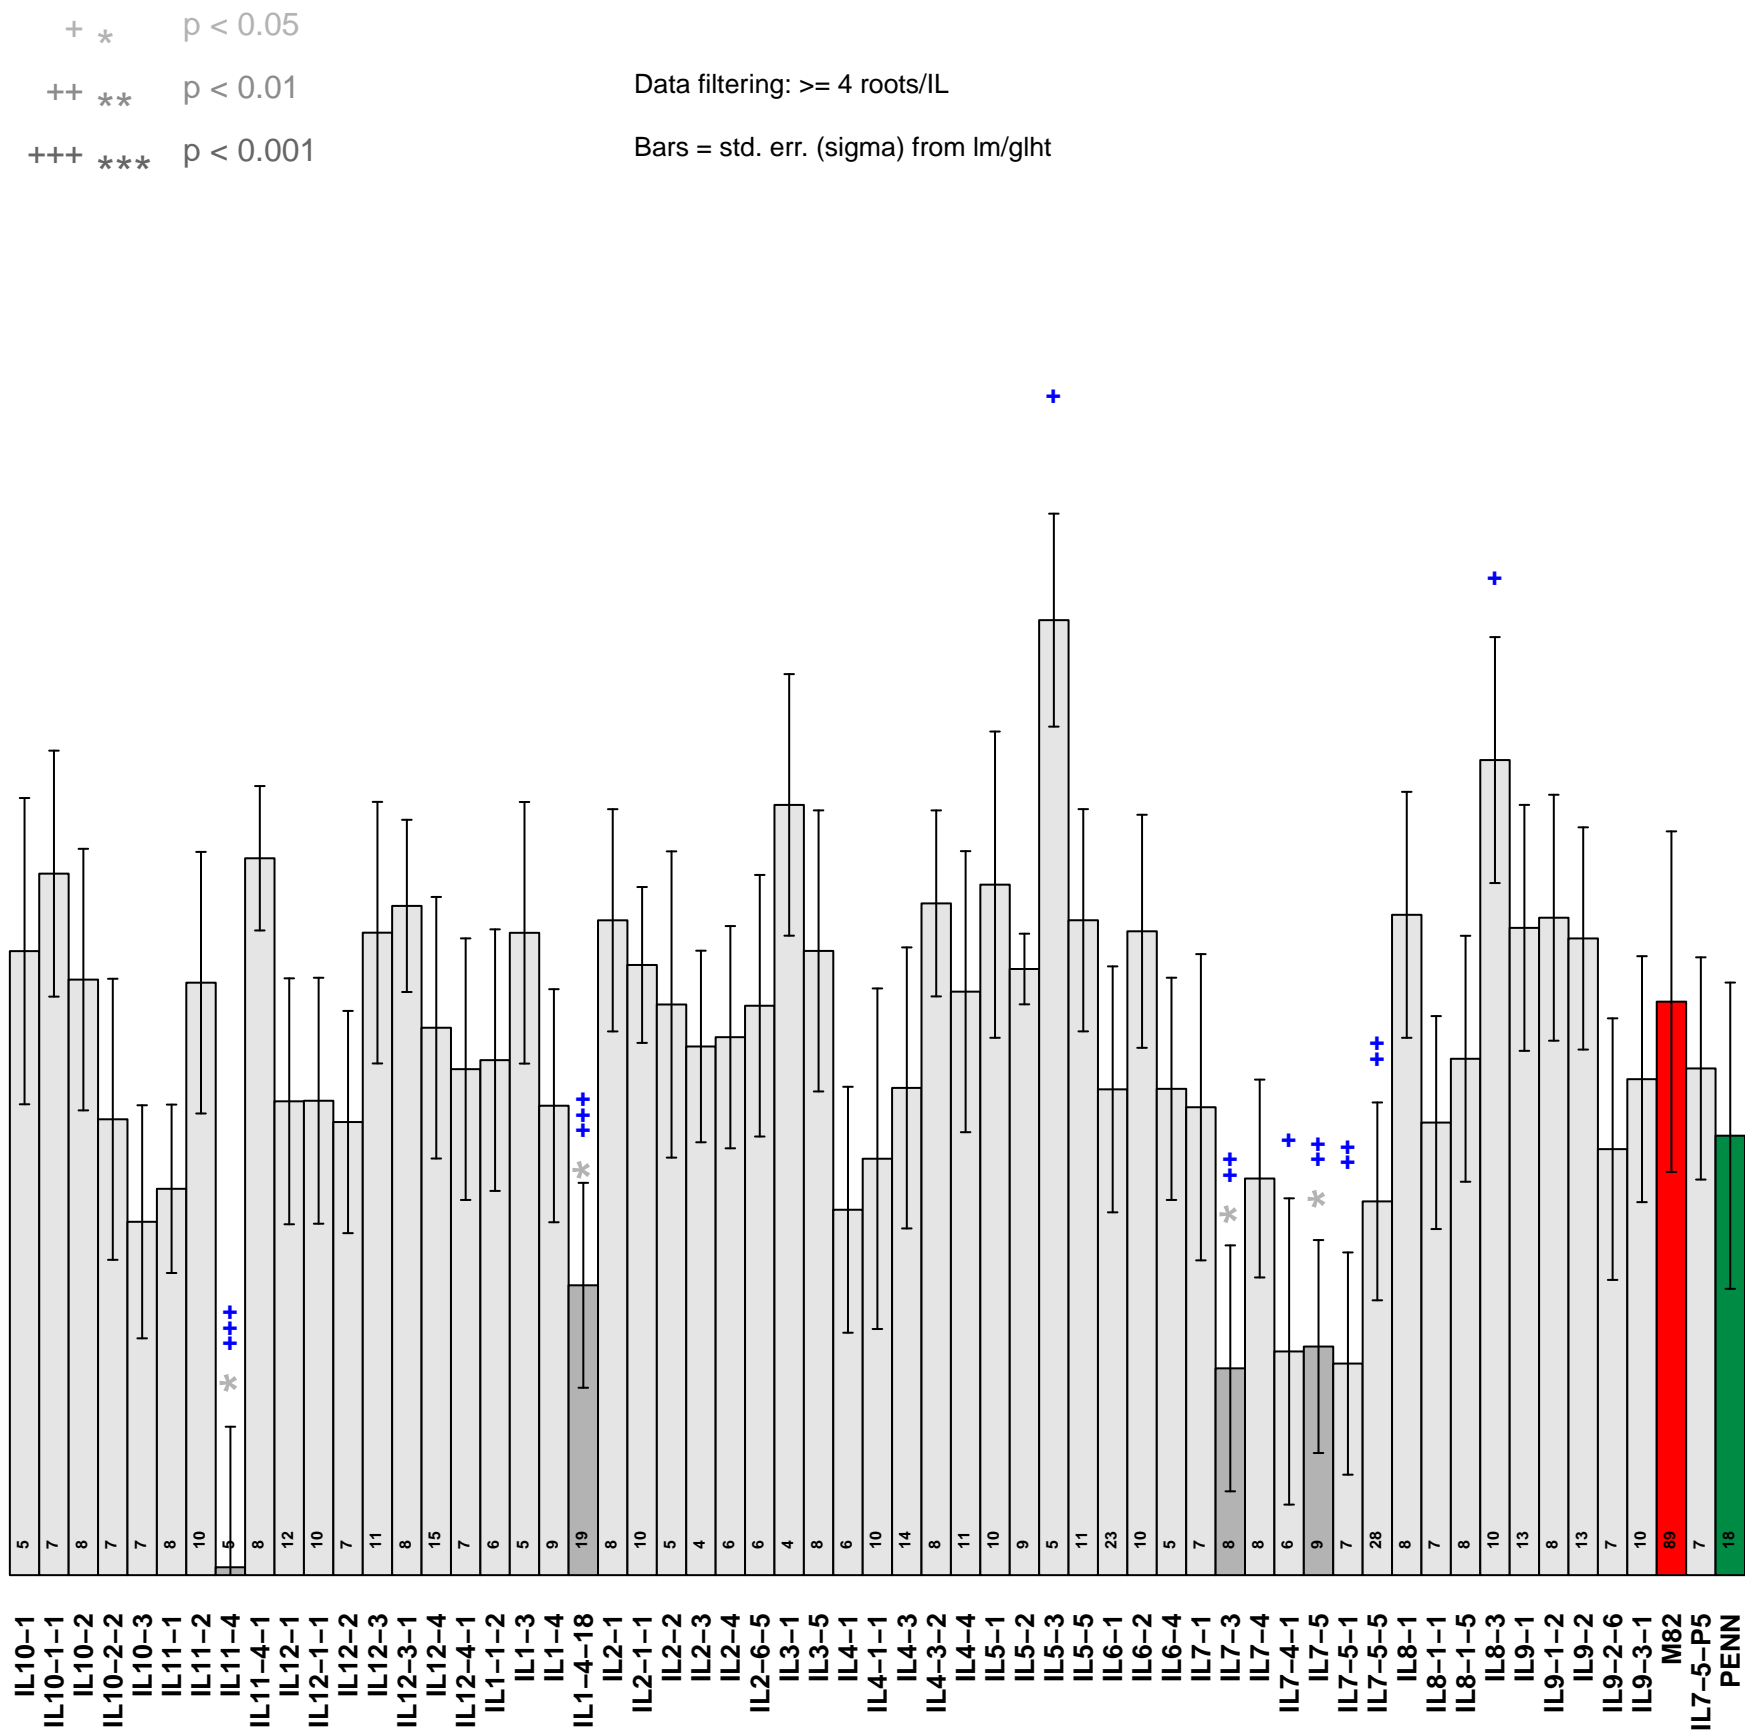

# Angle T14

degrees

60  
50  
40  
30  
20  
10  
0

+ \*  $p < 0.05$   
++ \*\*  $p < 0.01$   
+++ \*\*\*  $p < 0.001$

Data filtering:  $\geq 4$  roots/IL

Bars = std. err. (sigma) from lm/glht

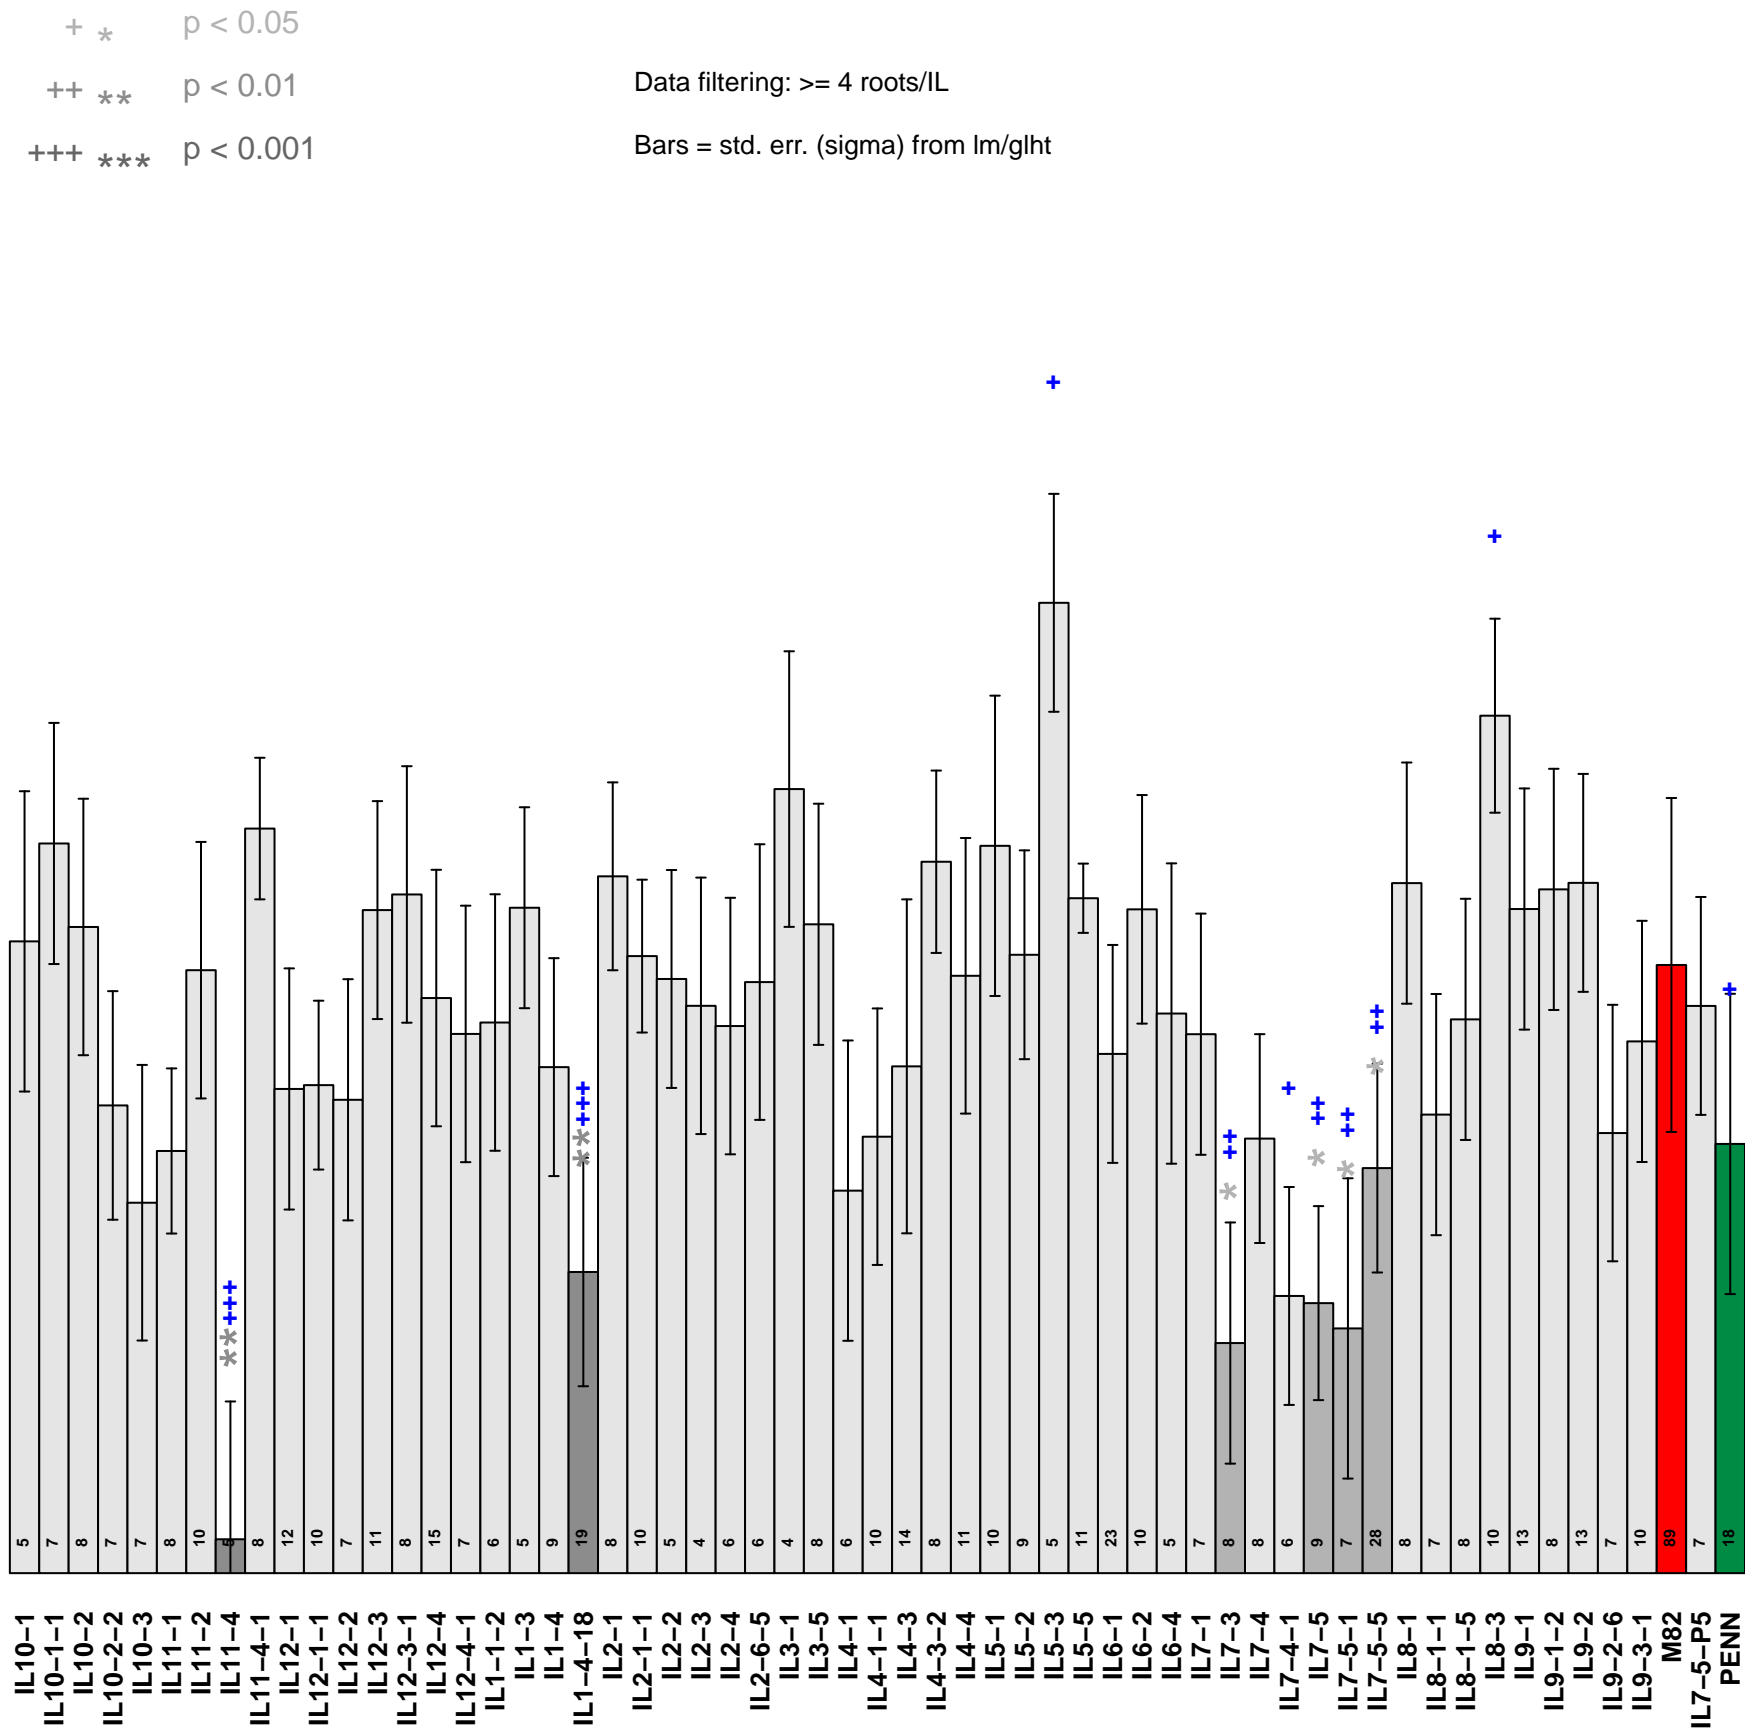

# Angle T15

degrees

60  
50  
40  
30  
20  
10  
0

+ \*  $p < 0.05$   
++ \*\*  $p < 0.01$   
+++ \*\*\*  $p < 0.001$

Data filtering:  $\geq 4$  roots/IL

Bars = std. err. (sigma) from lm/glht

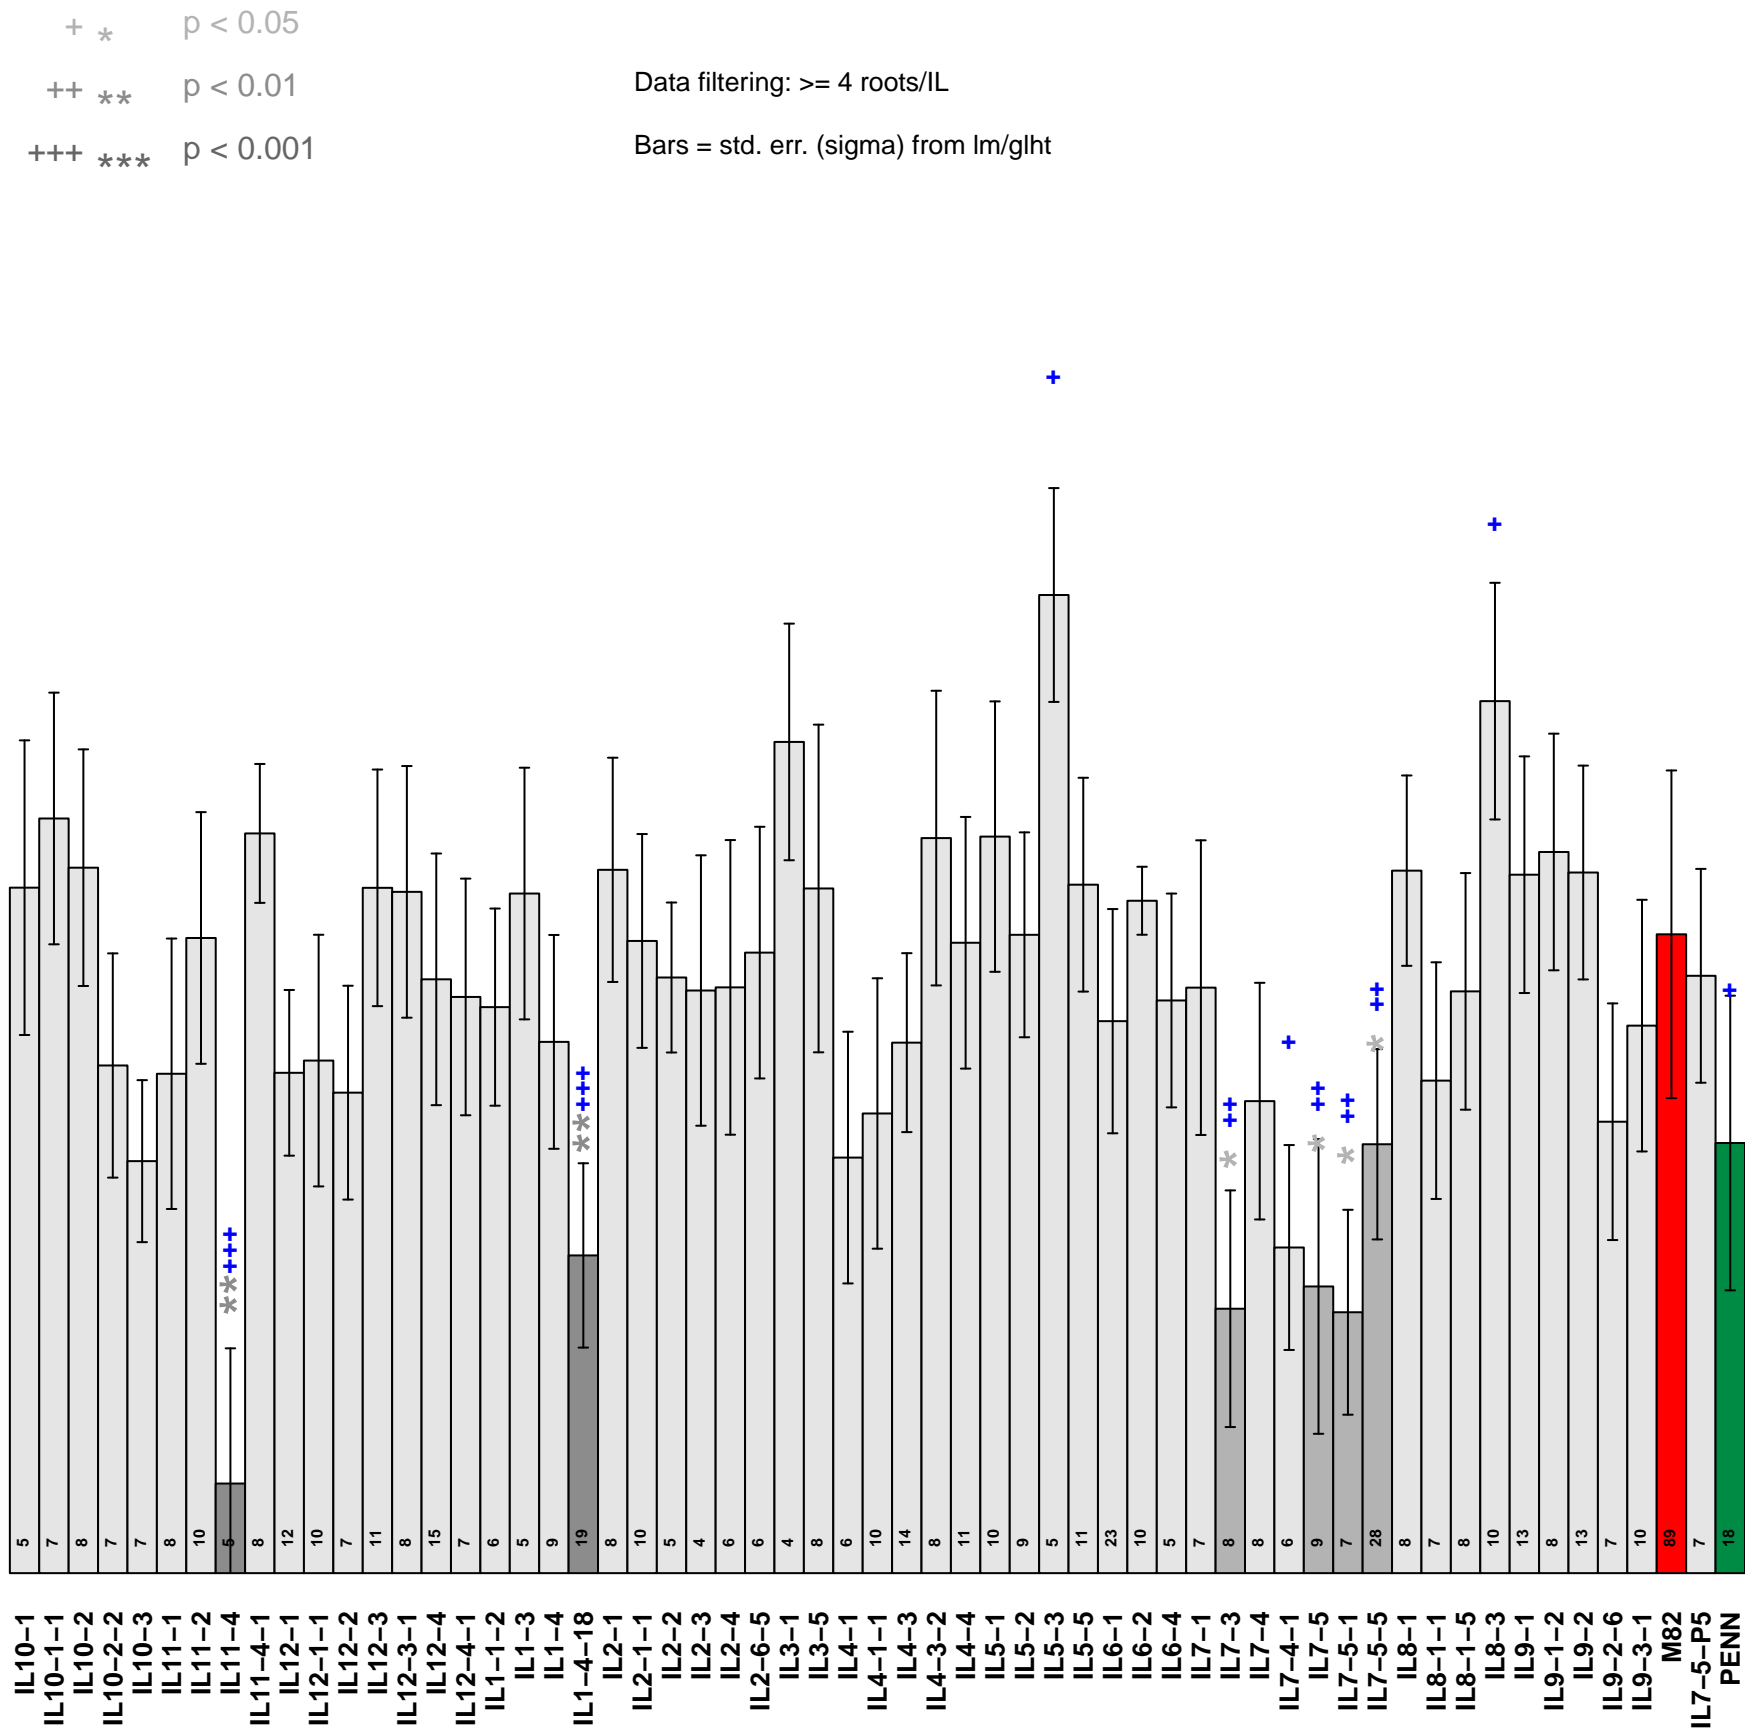



# Angle T16

degrees

60  
50  
40  
30  
20  
10  
0

+ \*  $p < 0.05$   
++ \*\*  $p < 0.01$   
+++ \*\*\*  $p < 0.001$

Data filtering:  $\geq 4$  roots/IL

Bars = std. err. (sigma) from lm/glht

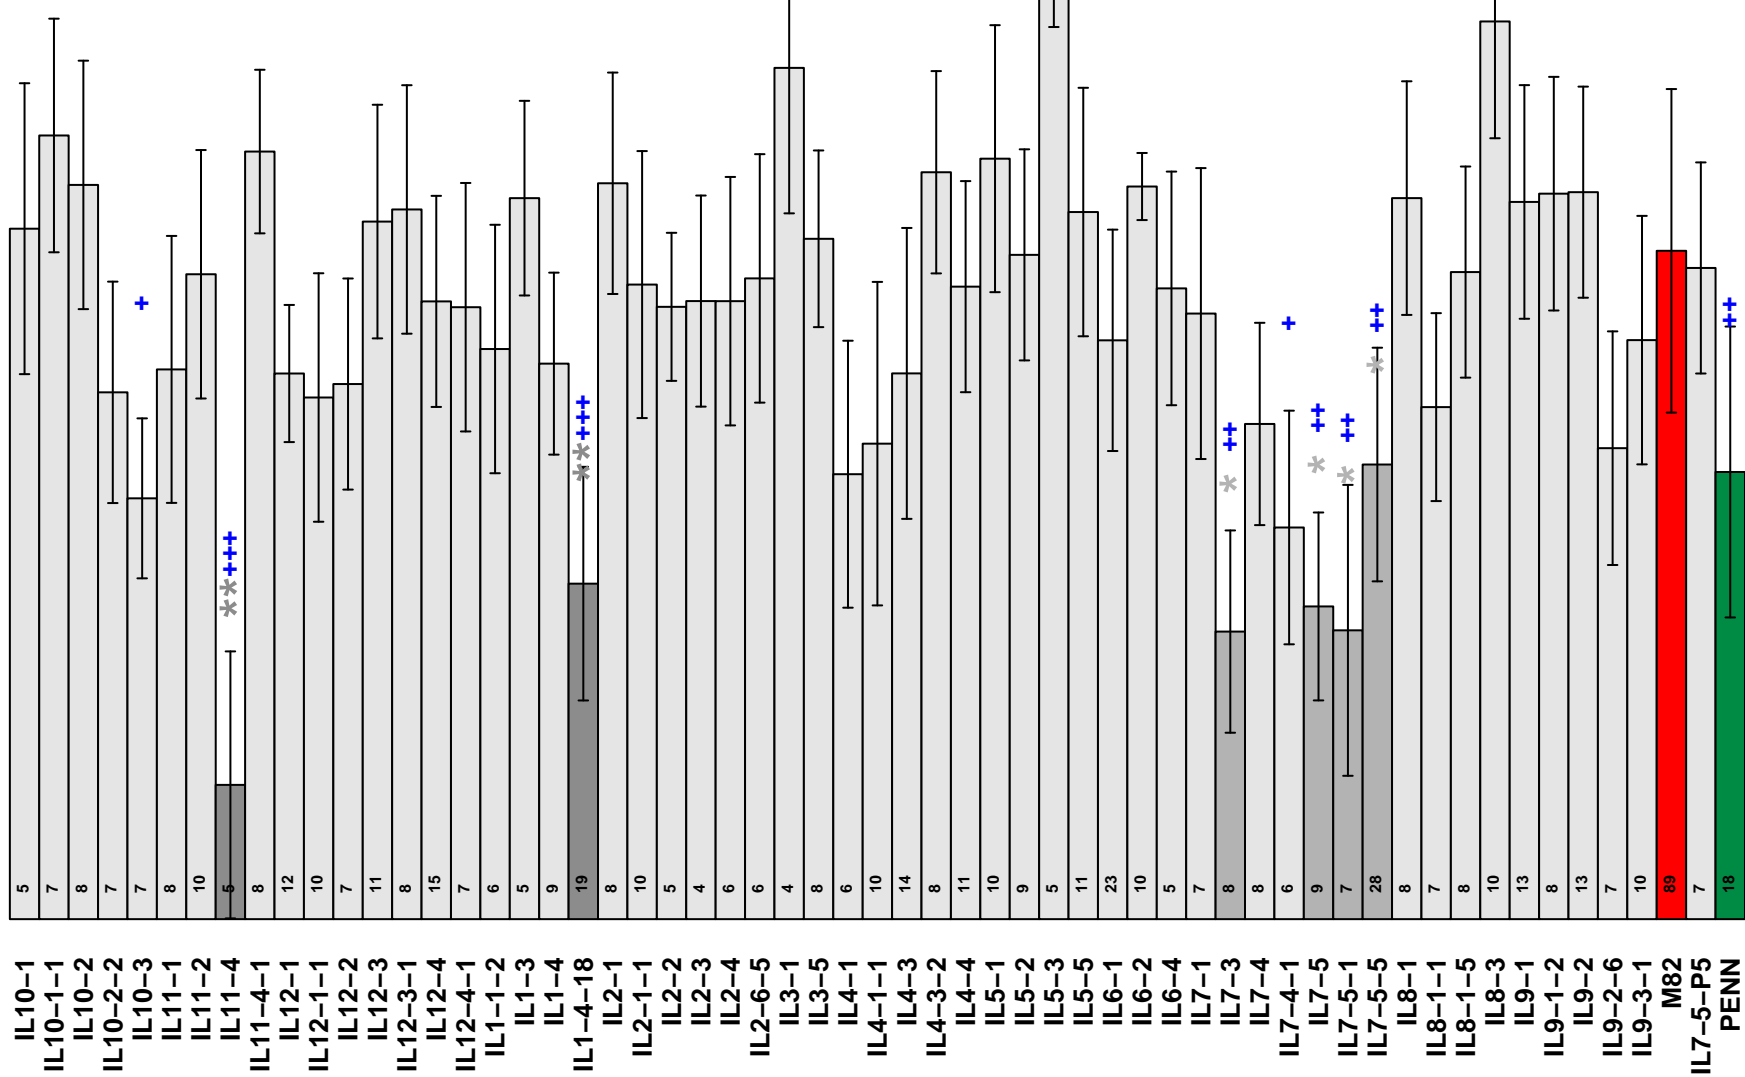

# Angle T17

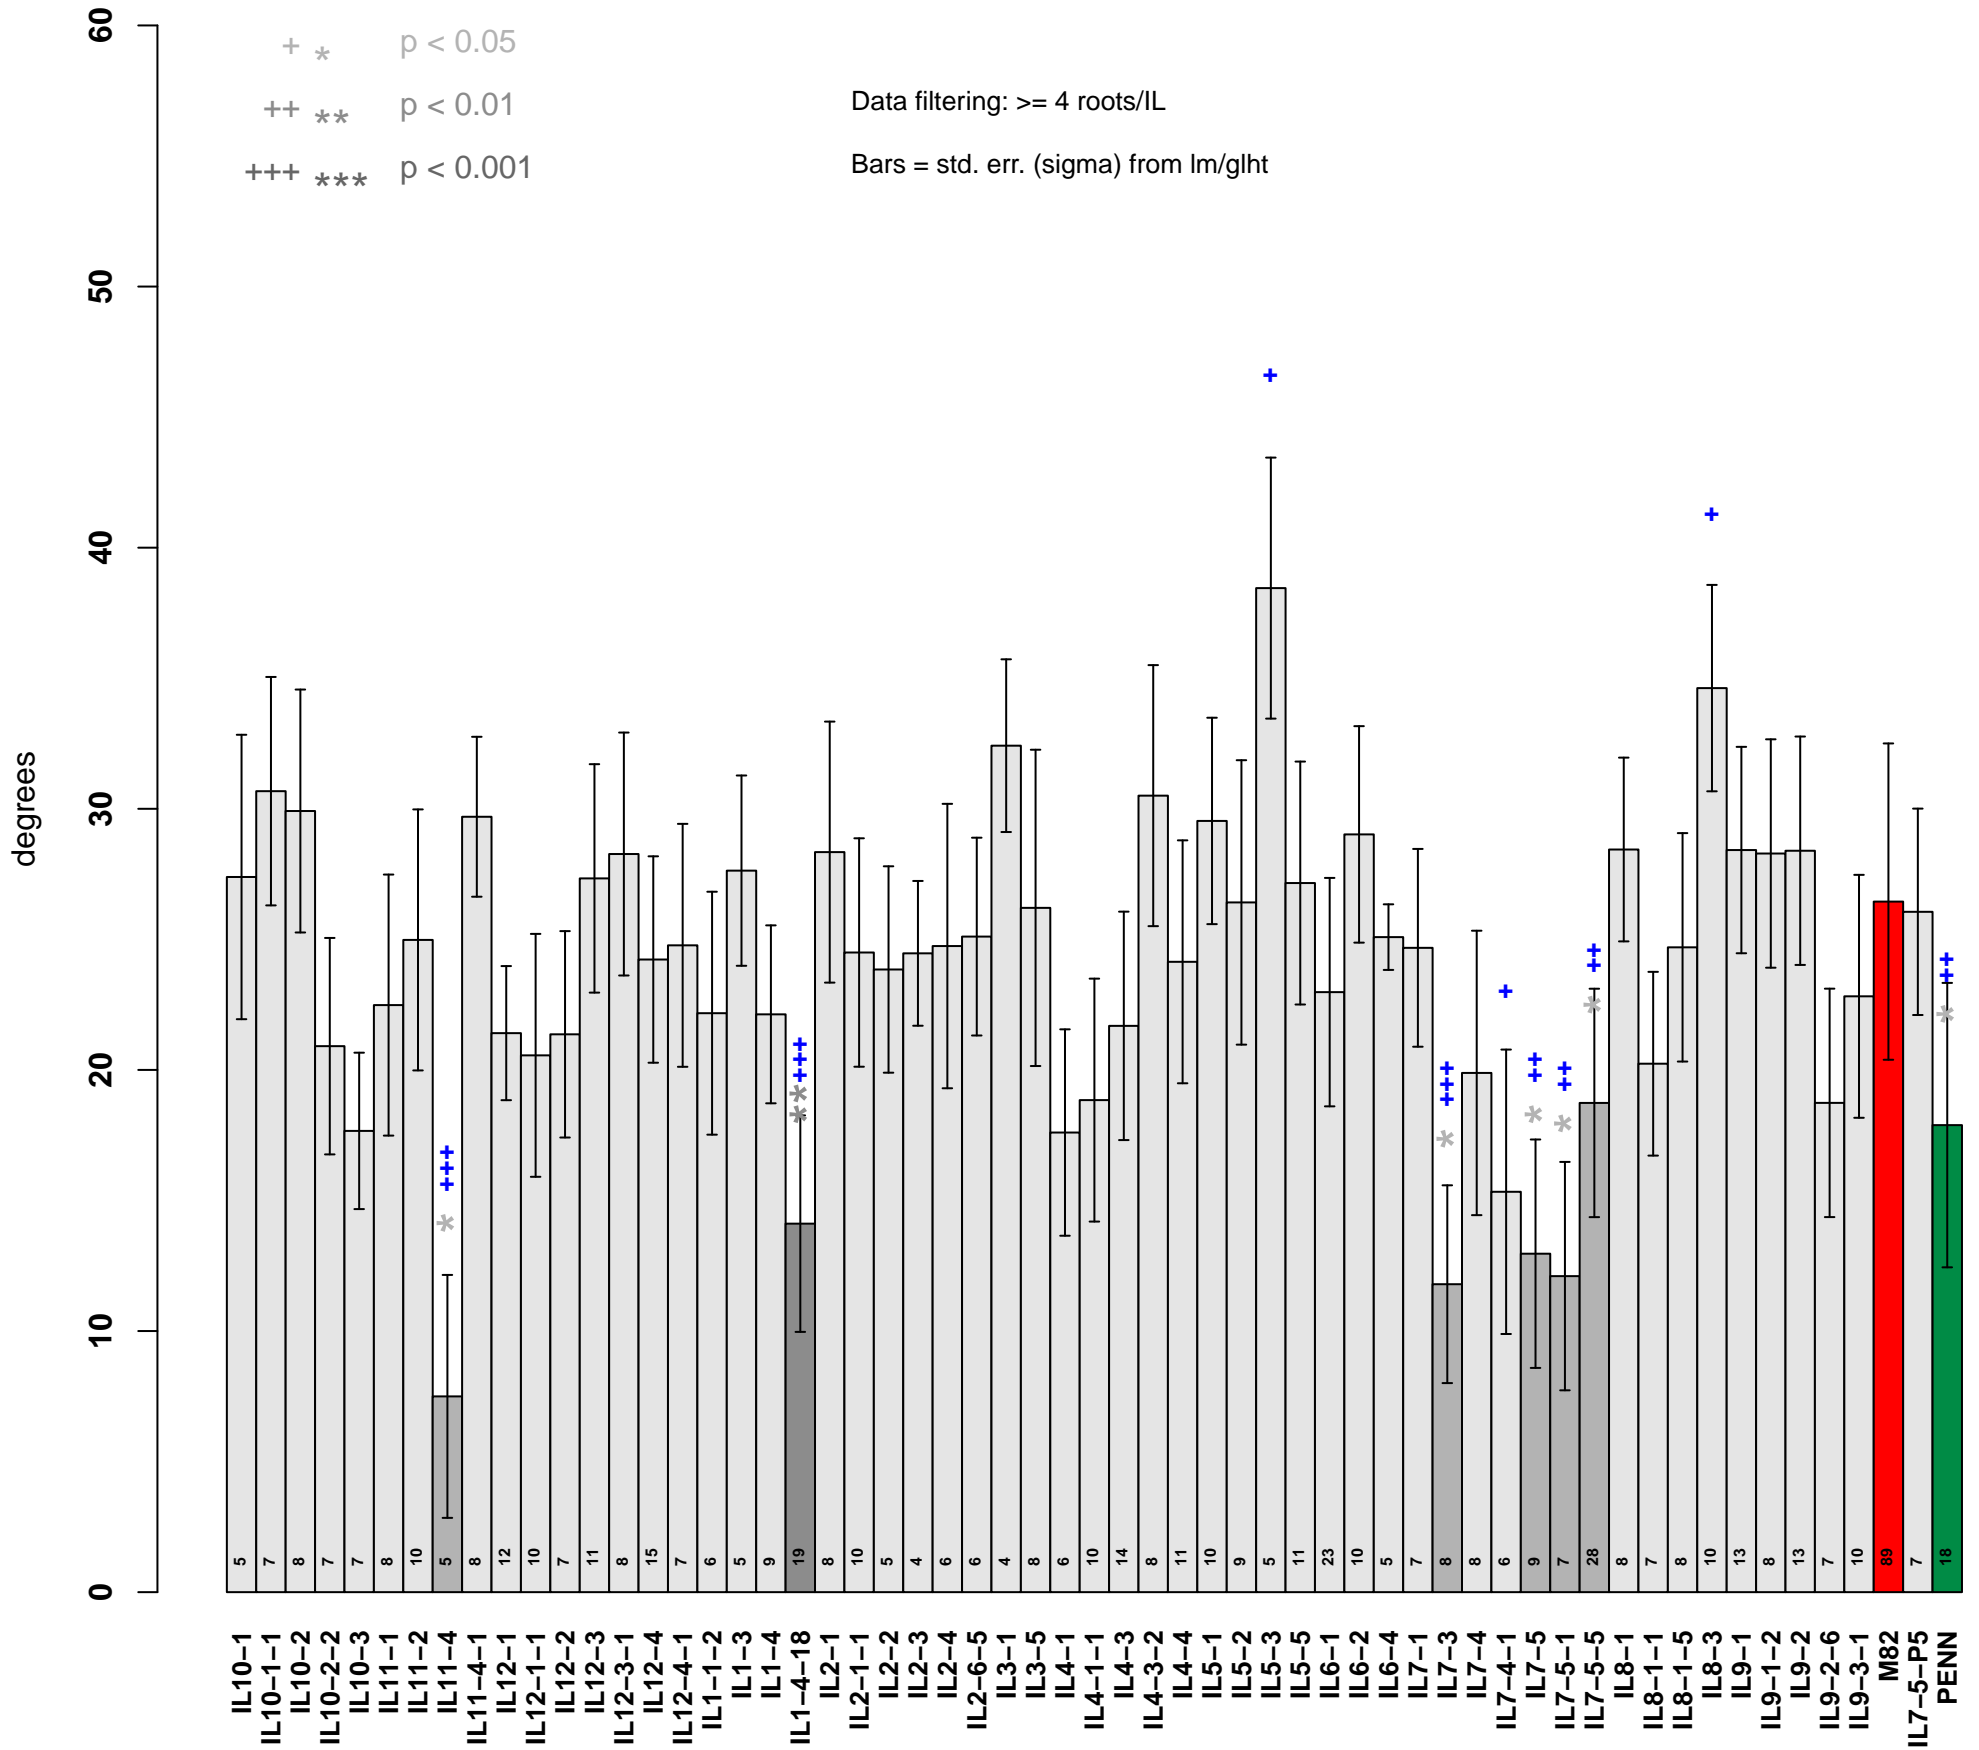

# Angle T18

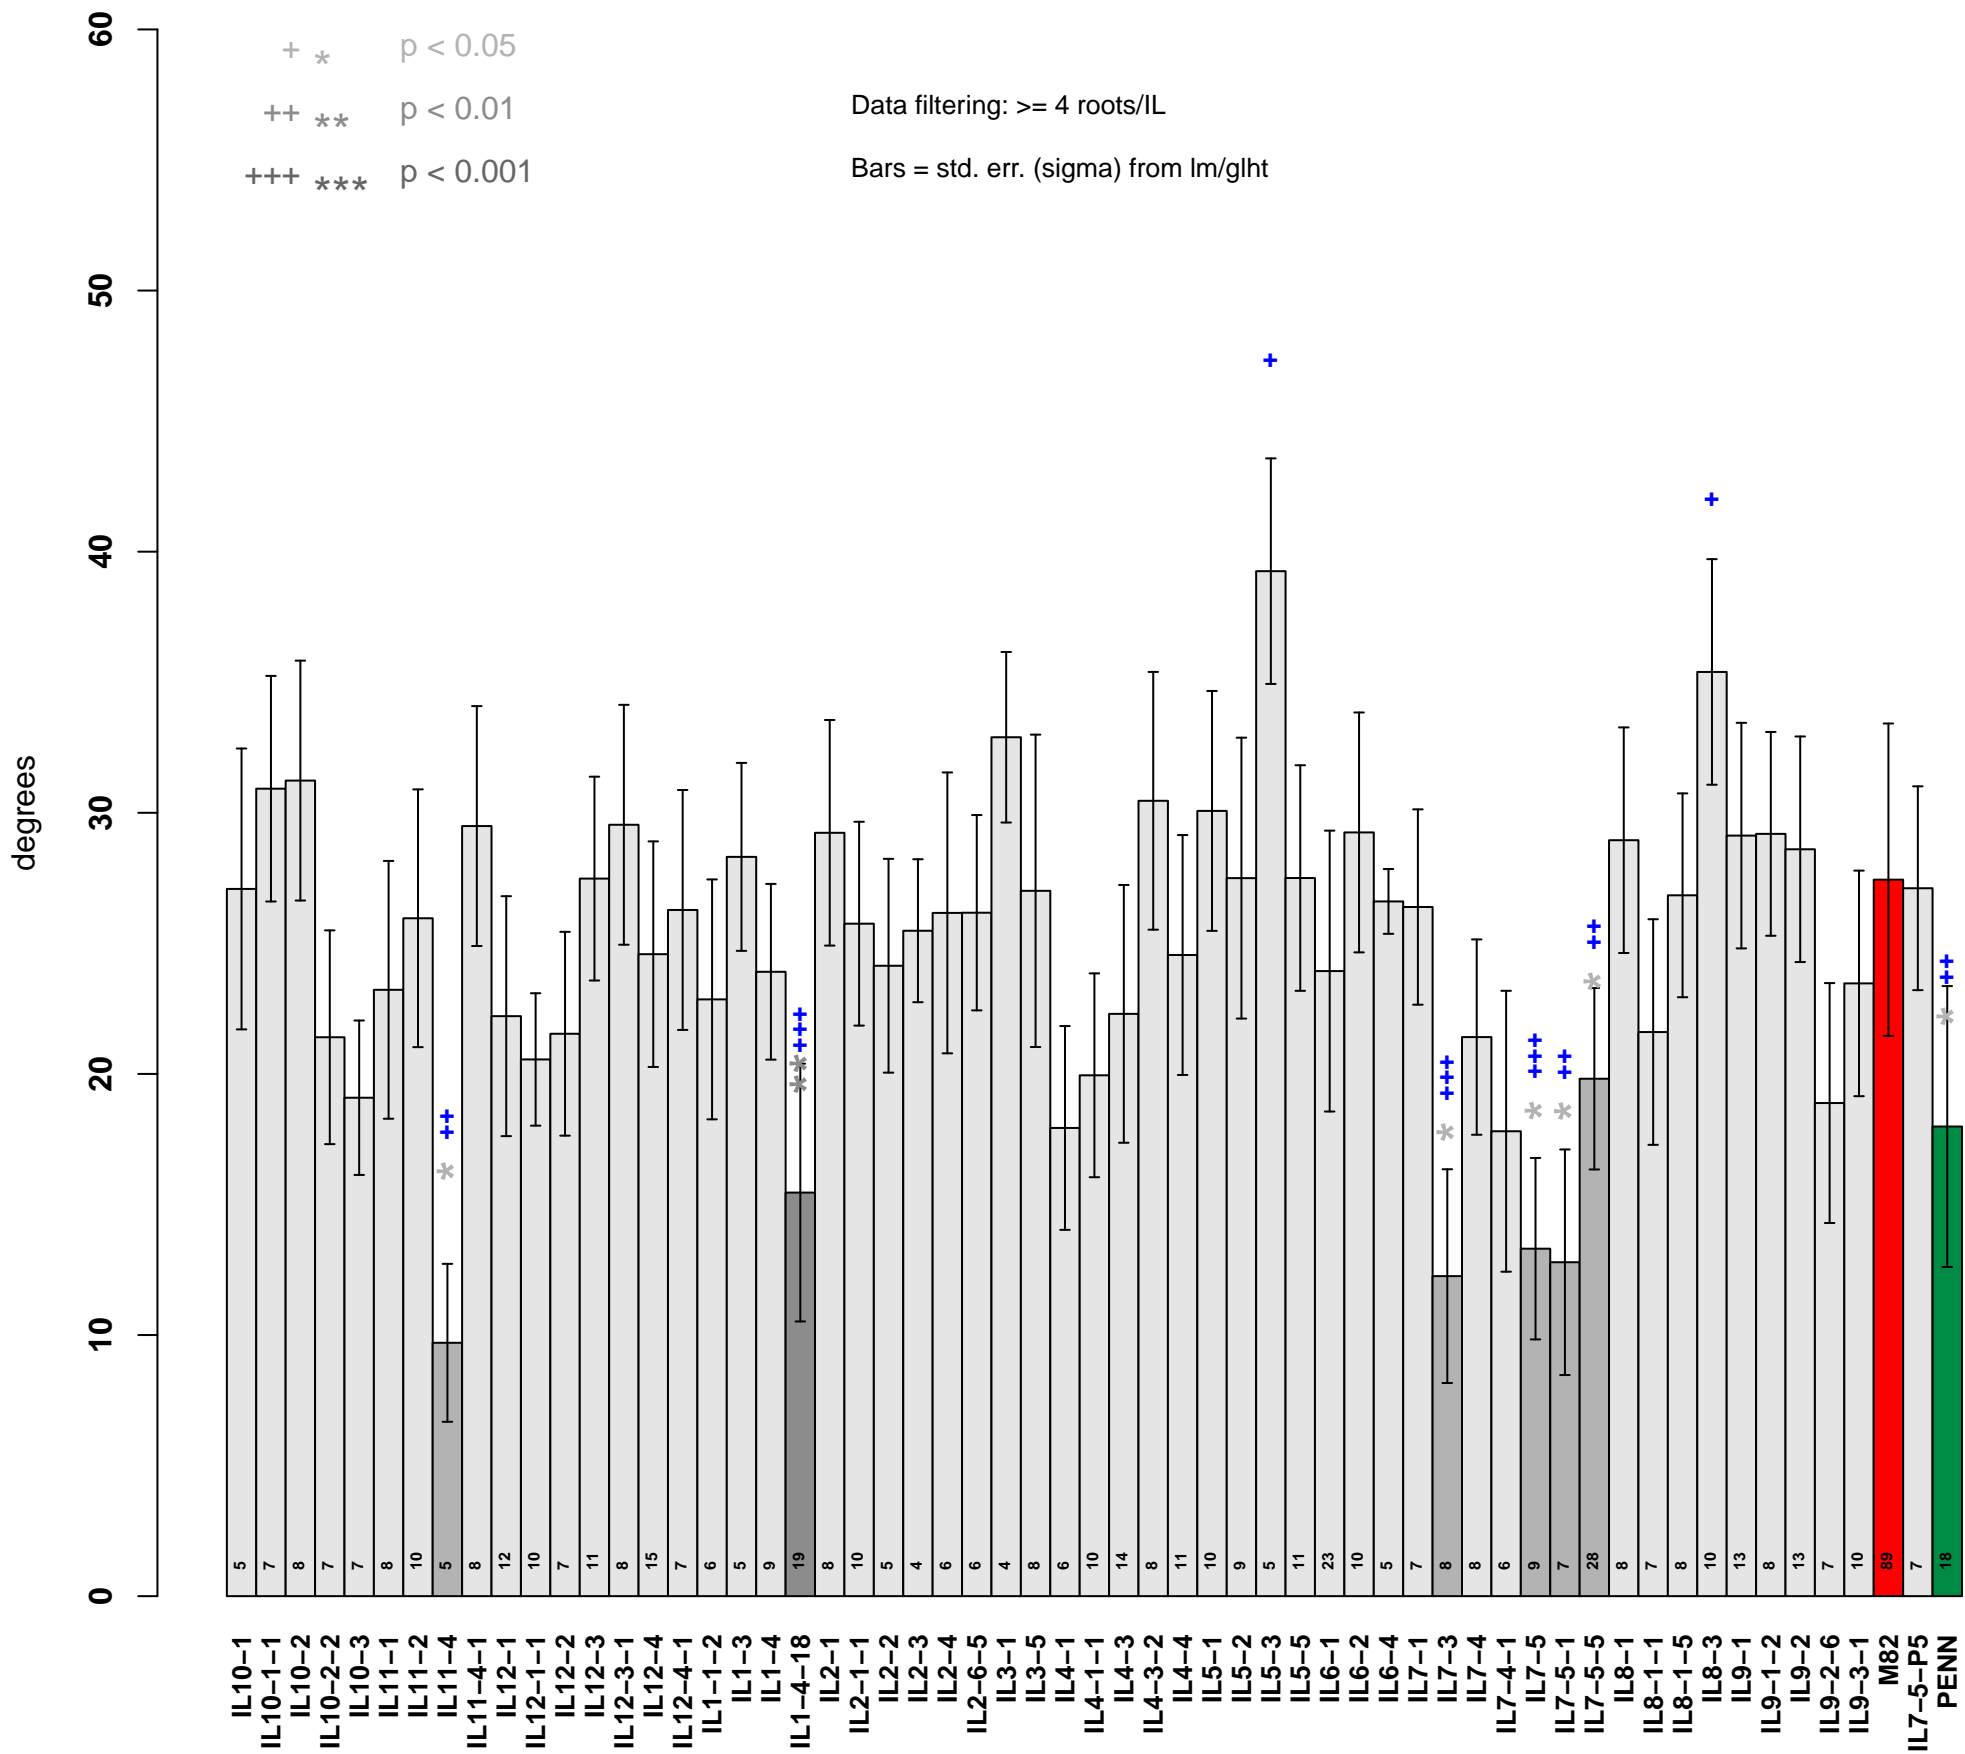

# Angle T19

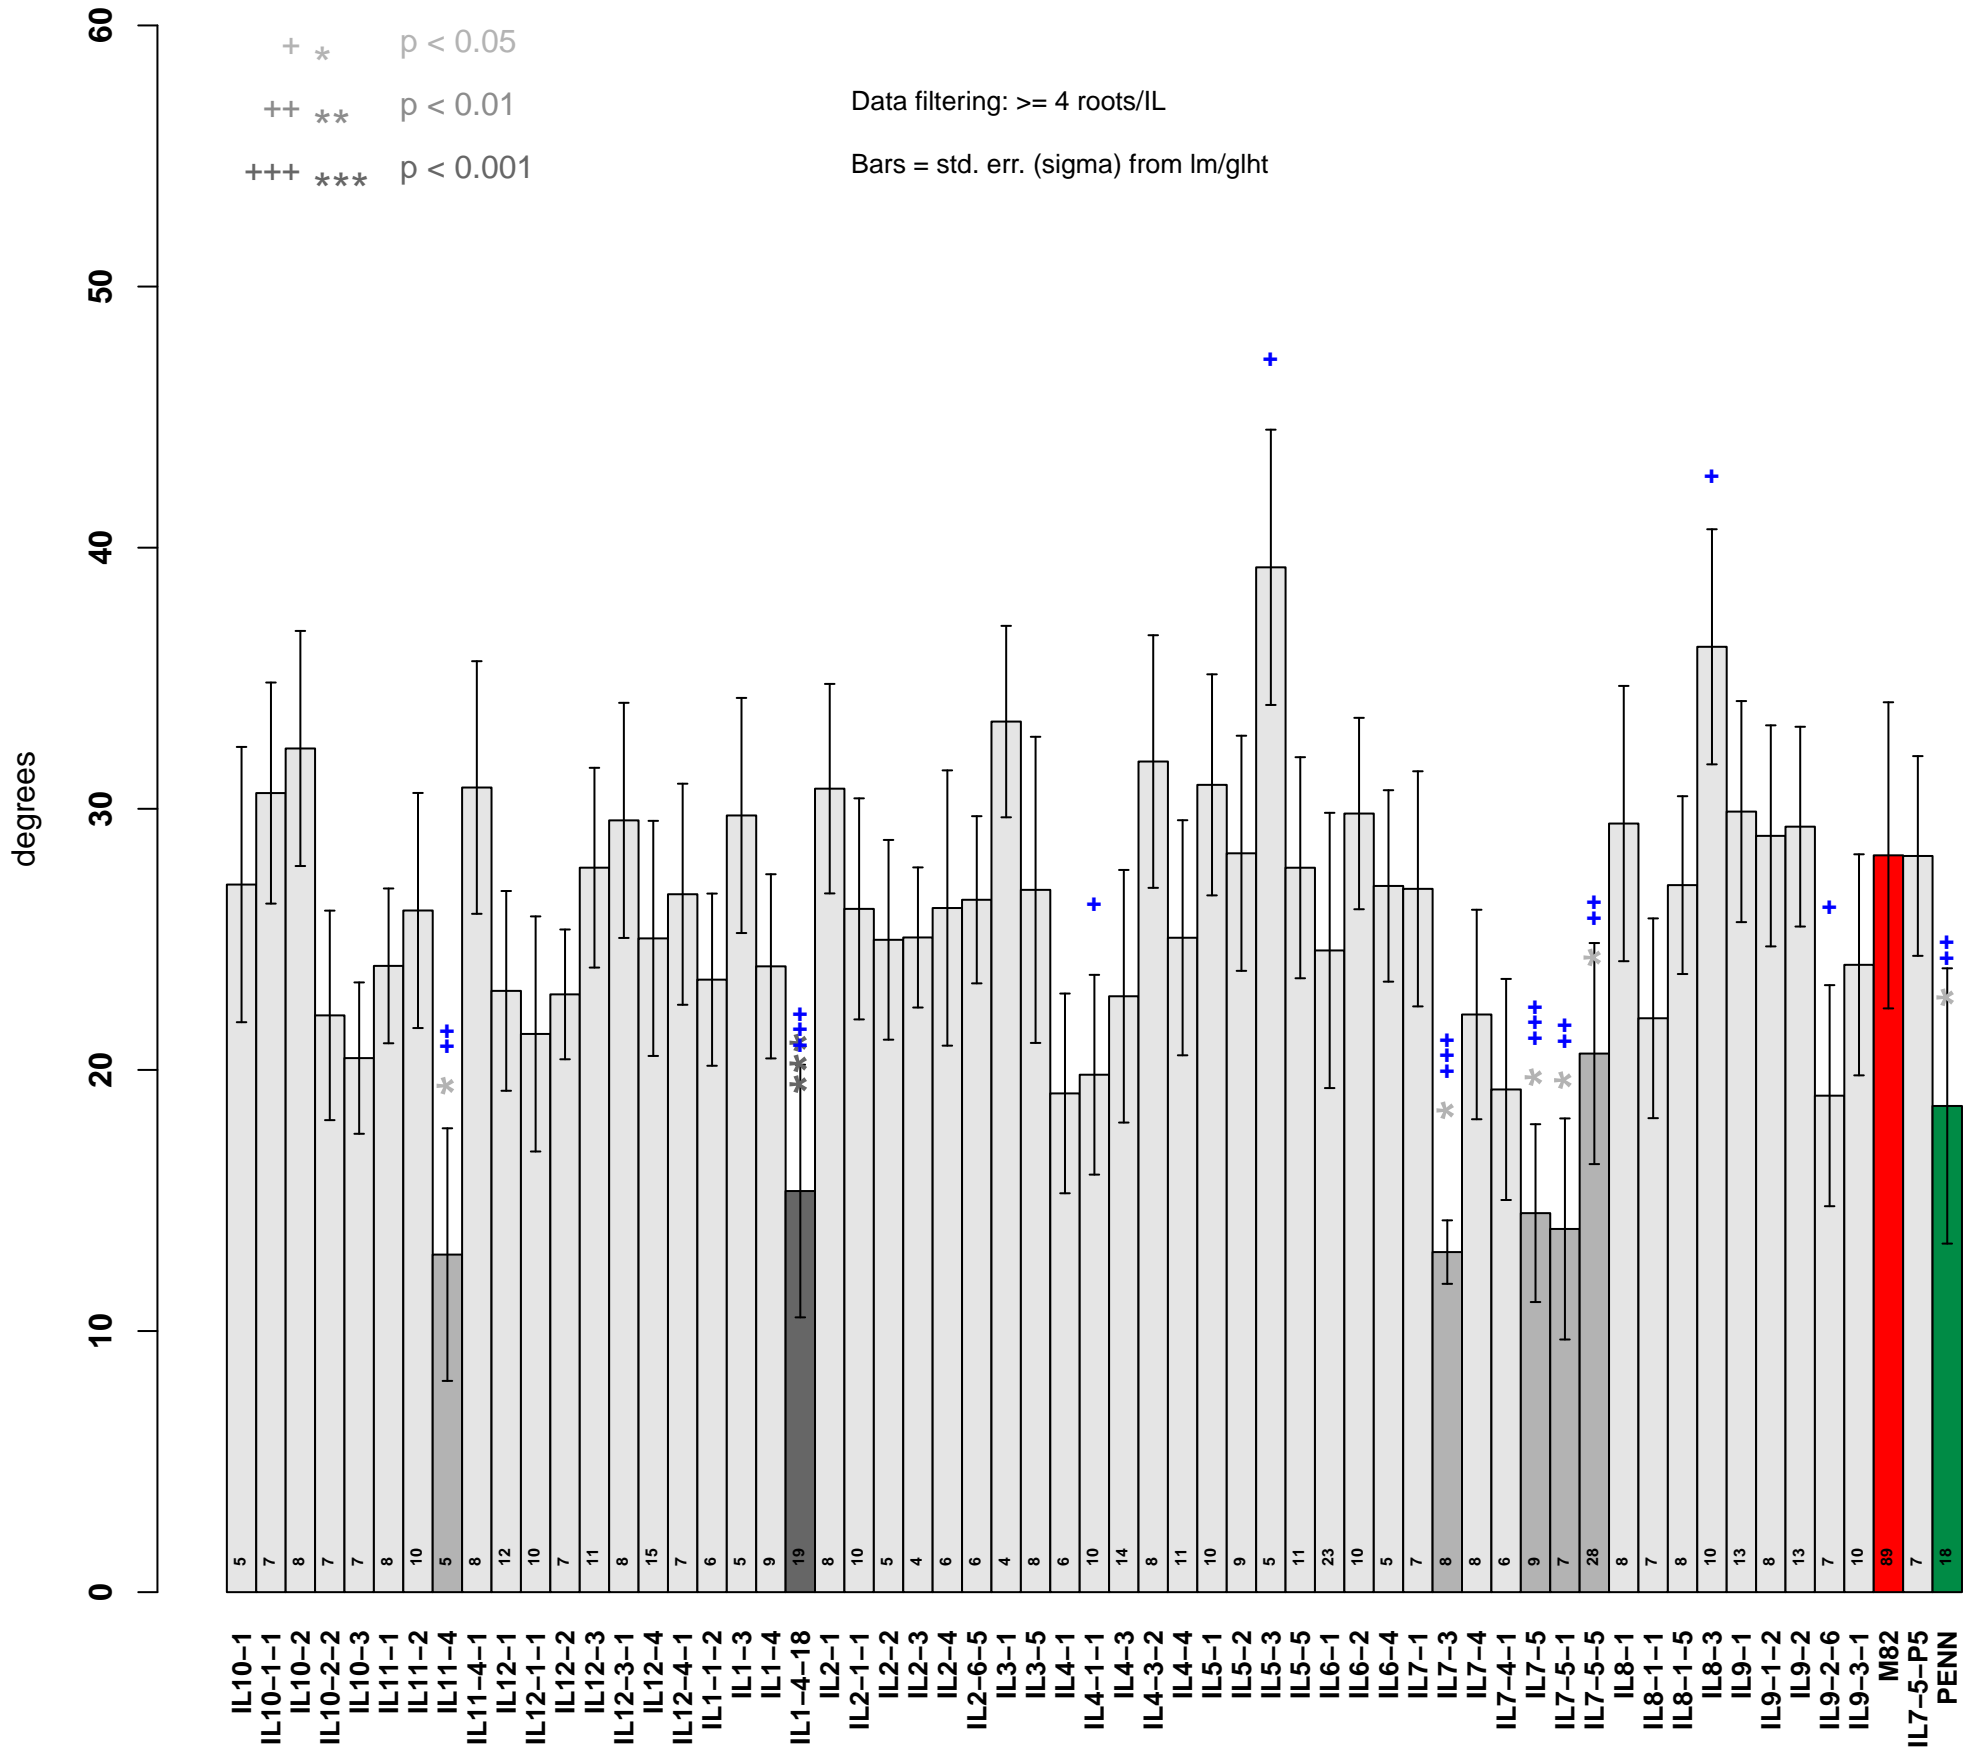

# Angle T20

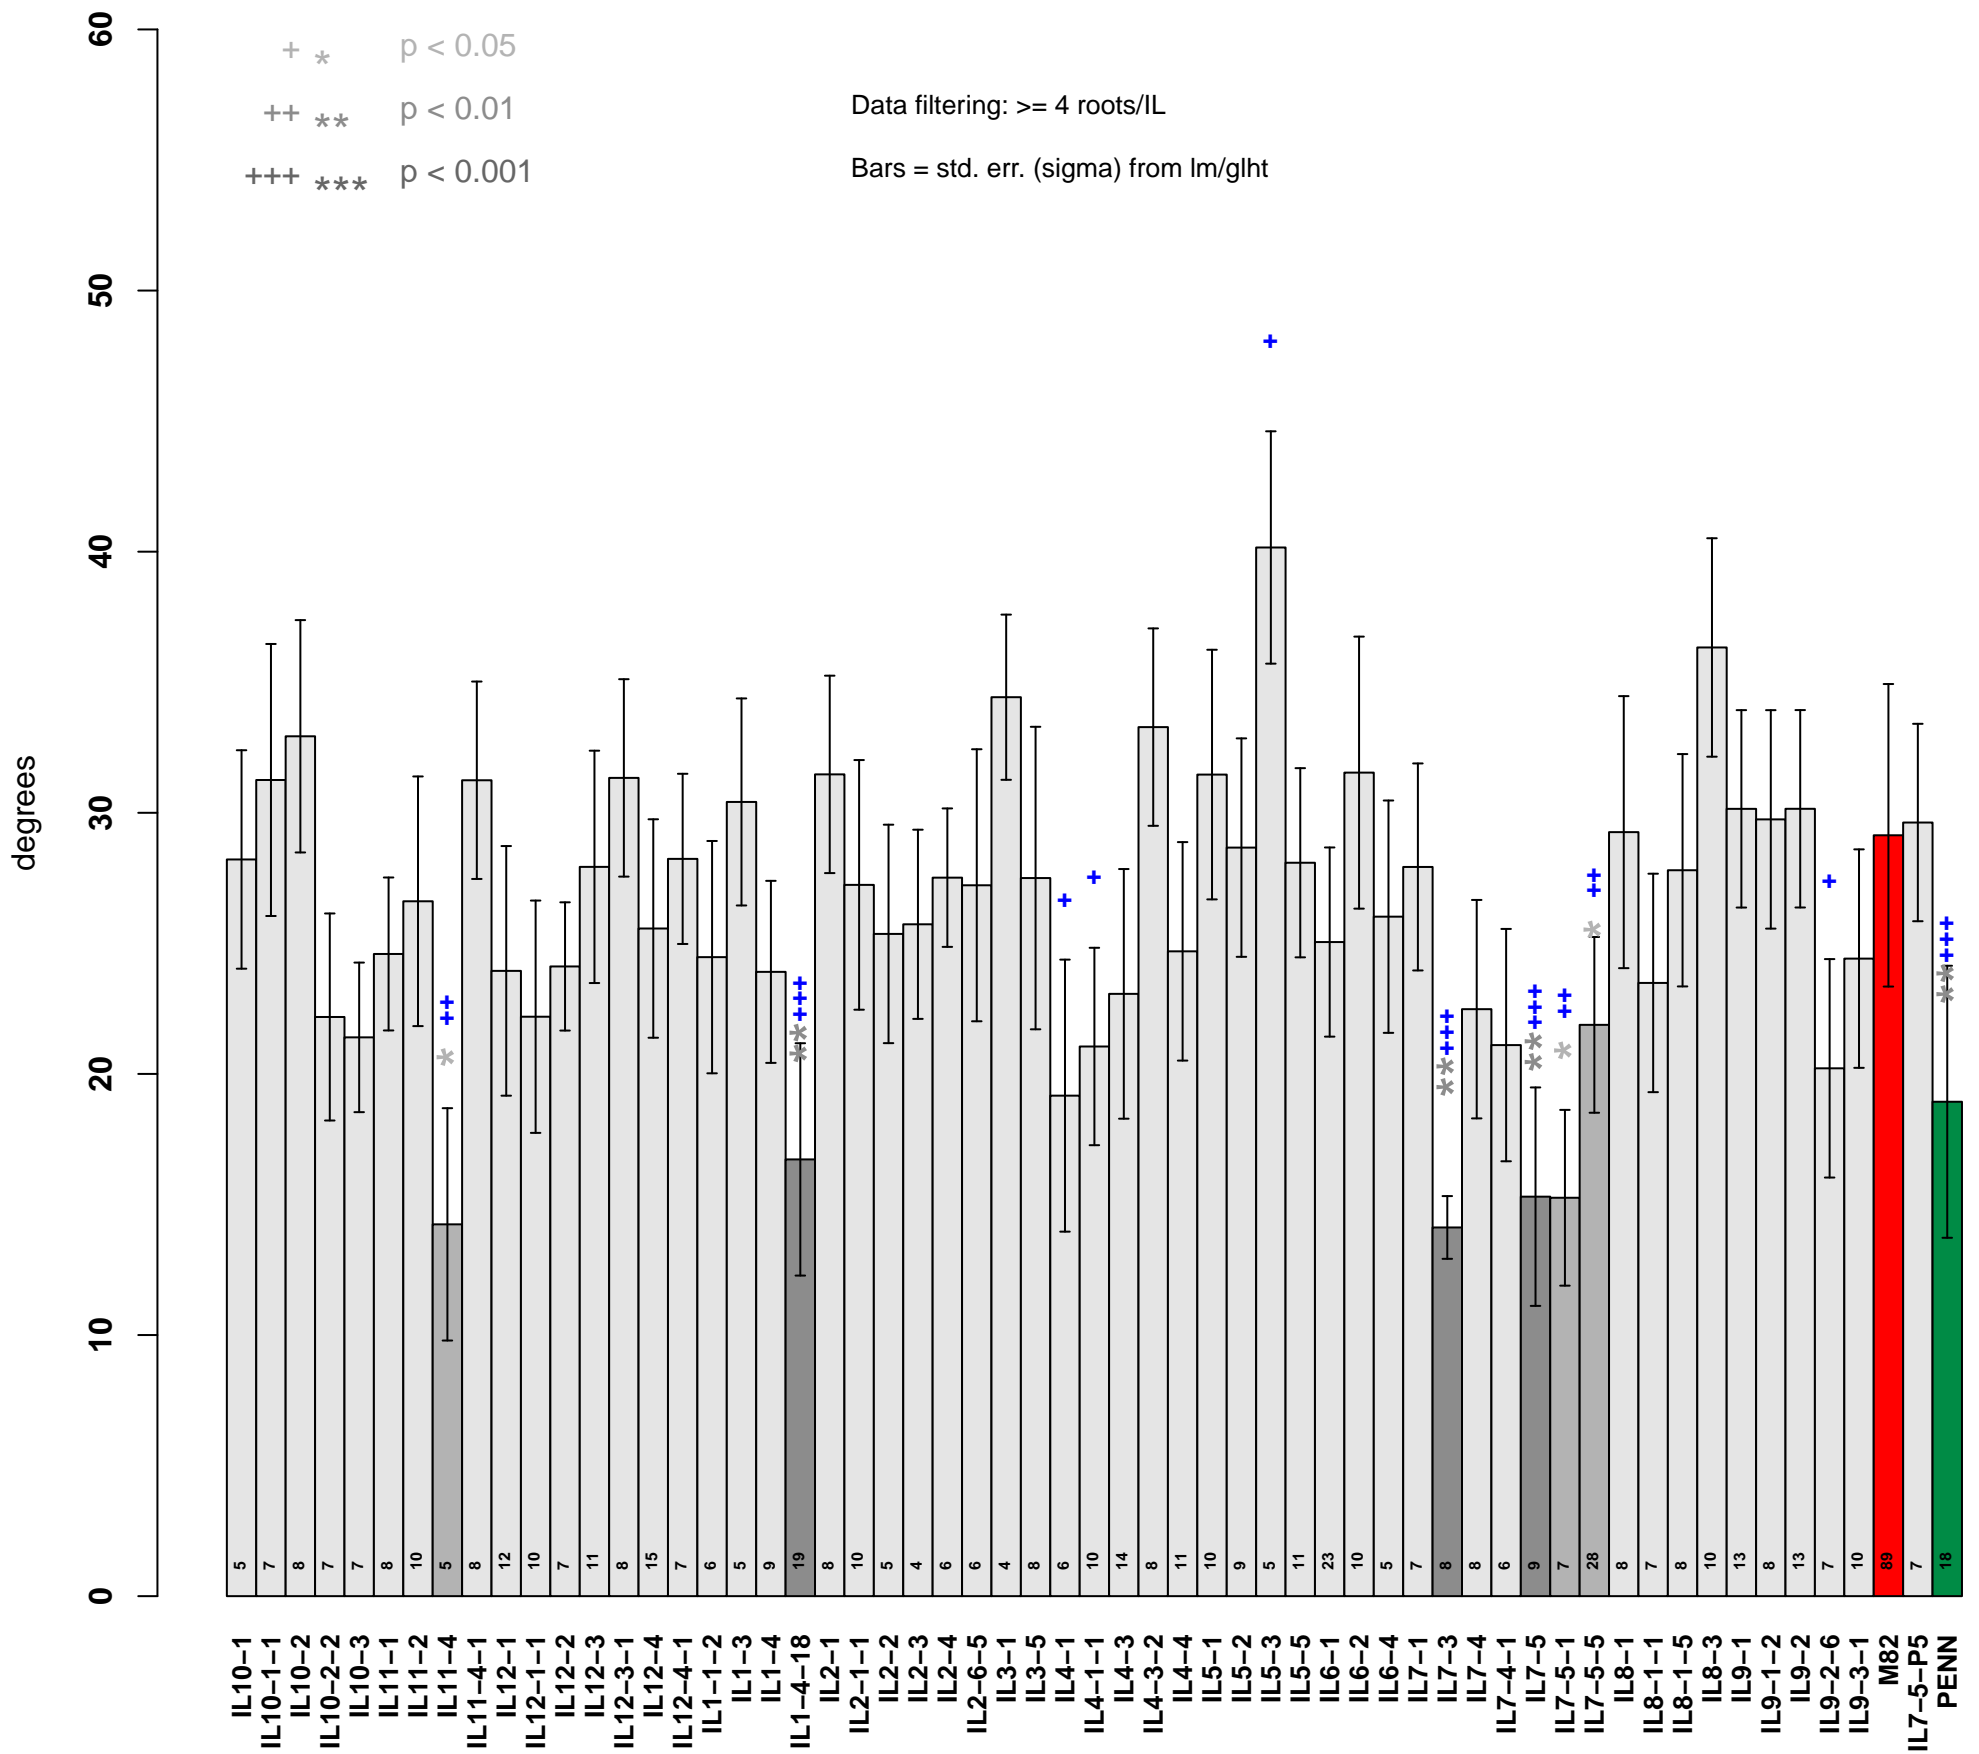

# Angle T21

degrees

60  
50  
40  
30  
20  
10  
0

+ \*  $p < 0.05$   
++ \*\*  $p < 0.01$   
+++ \*\*\*  $p < 0.001$

Data filtering:  $\geq 4$  roots/IL

Bars = std. err. (sigma) from lm/glht

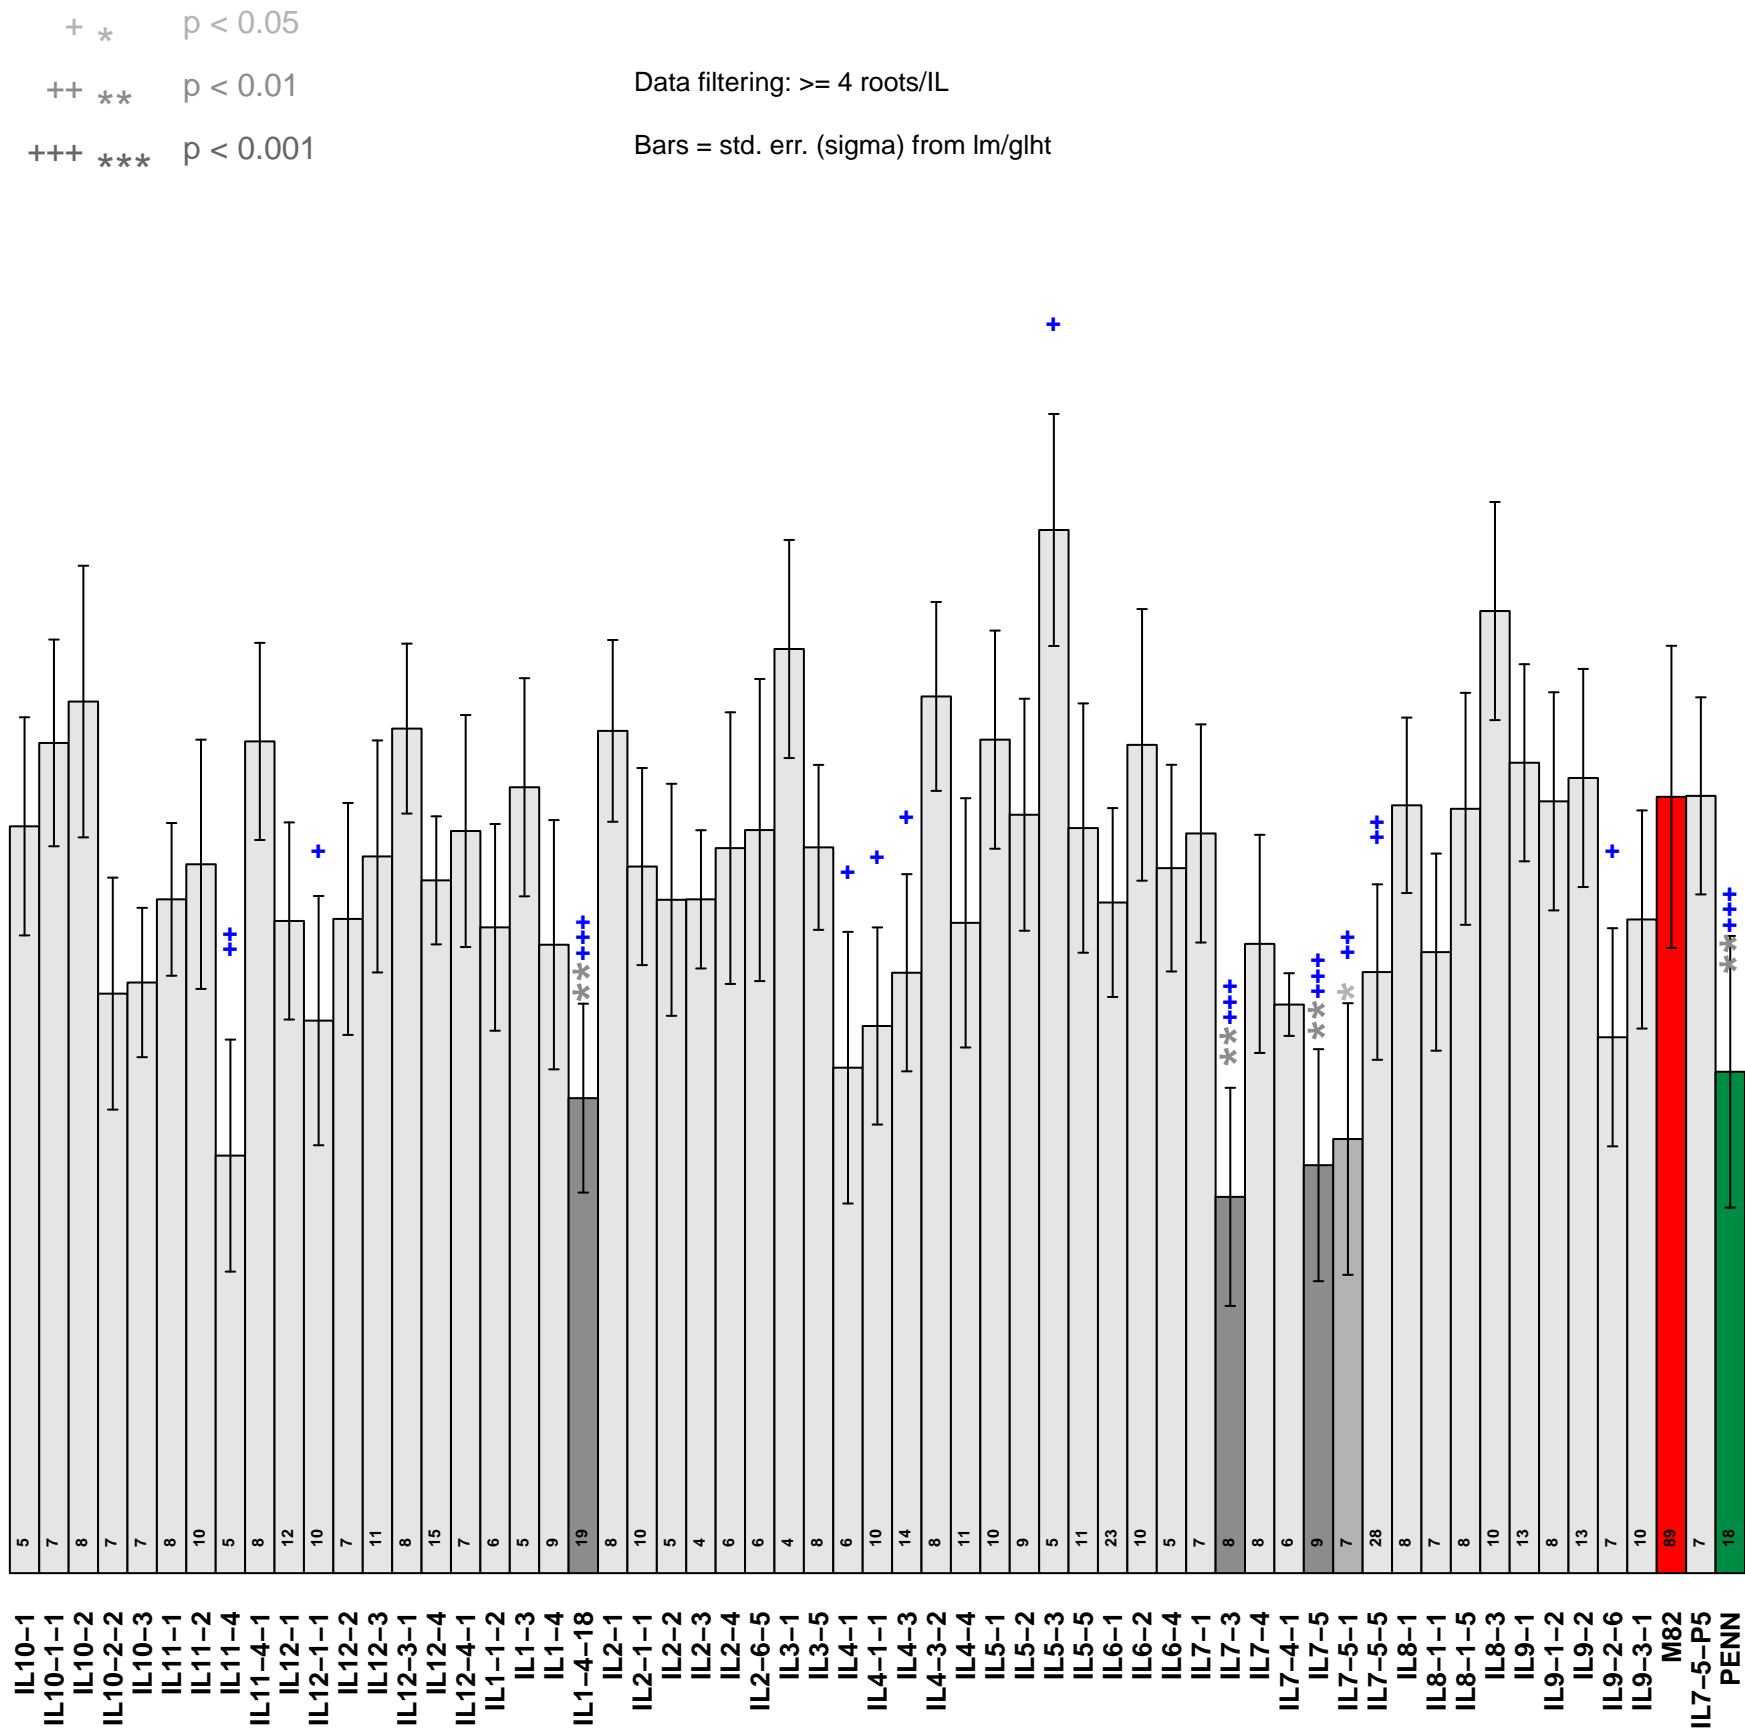

# Angle T22

degrees

60  
50  
40  
30  
20  
10  
0

+ \*  $p < 0.05$   
++ \*\*  $p < 0.01$   
+++ \*\*\*  $p < 0.001$

Data filtering:  $\geq 4$  roots/IL

Bars = std. err. (sigma) from lm/glht

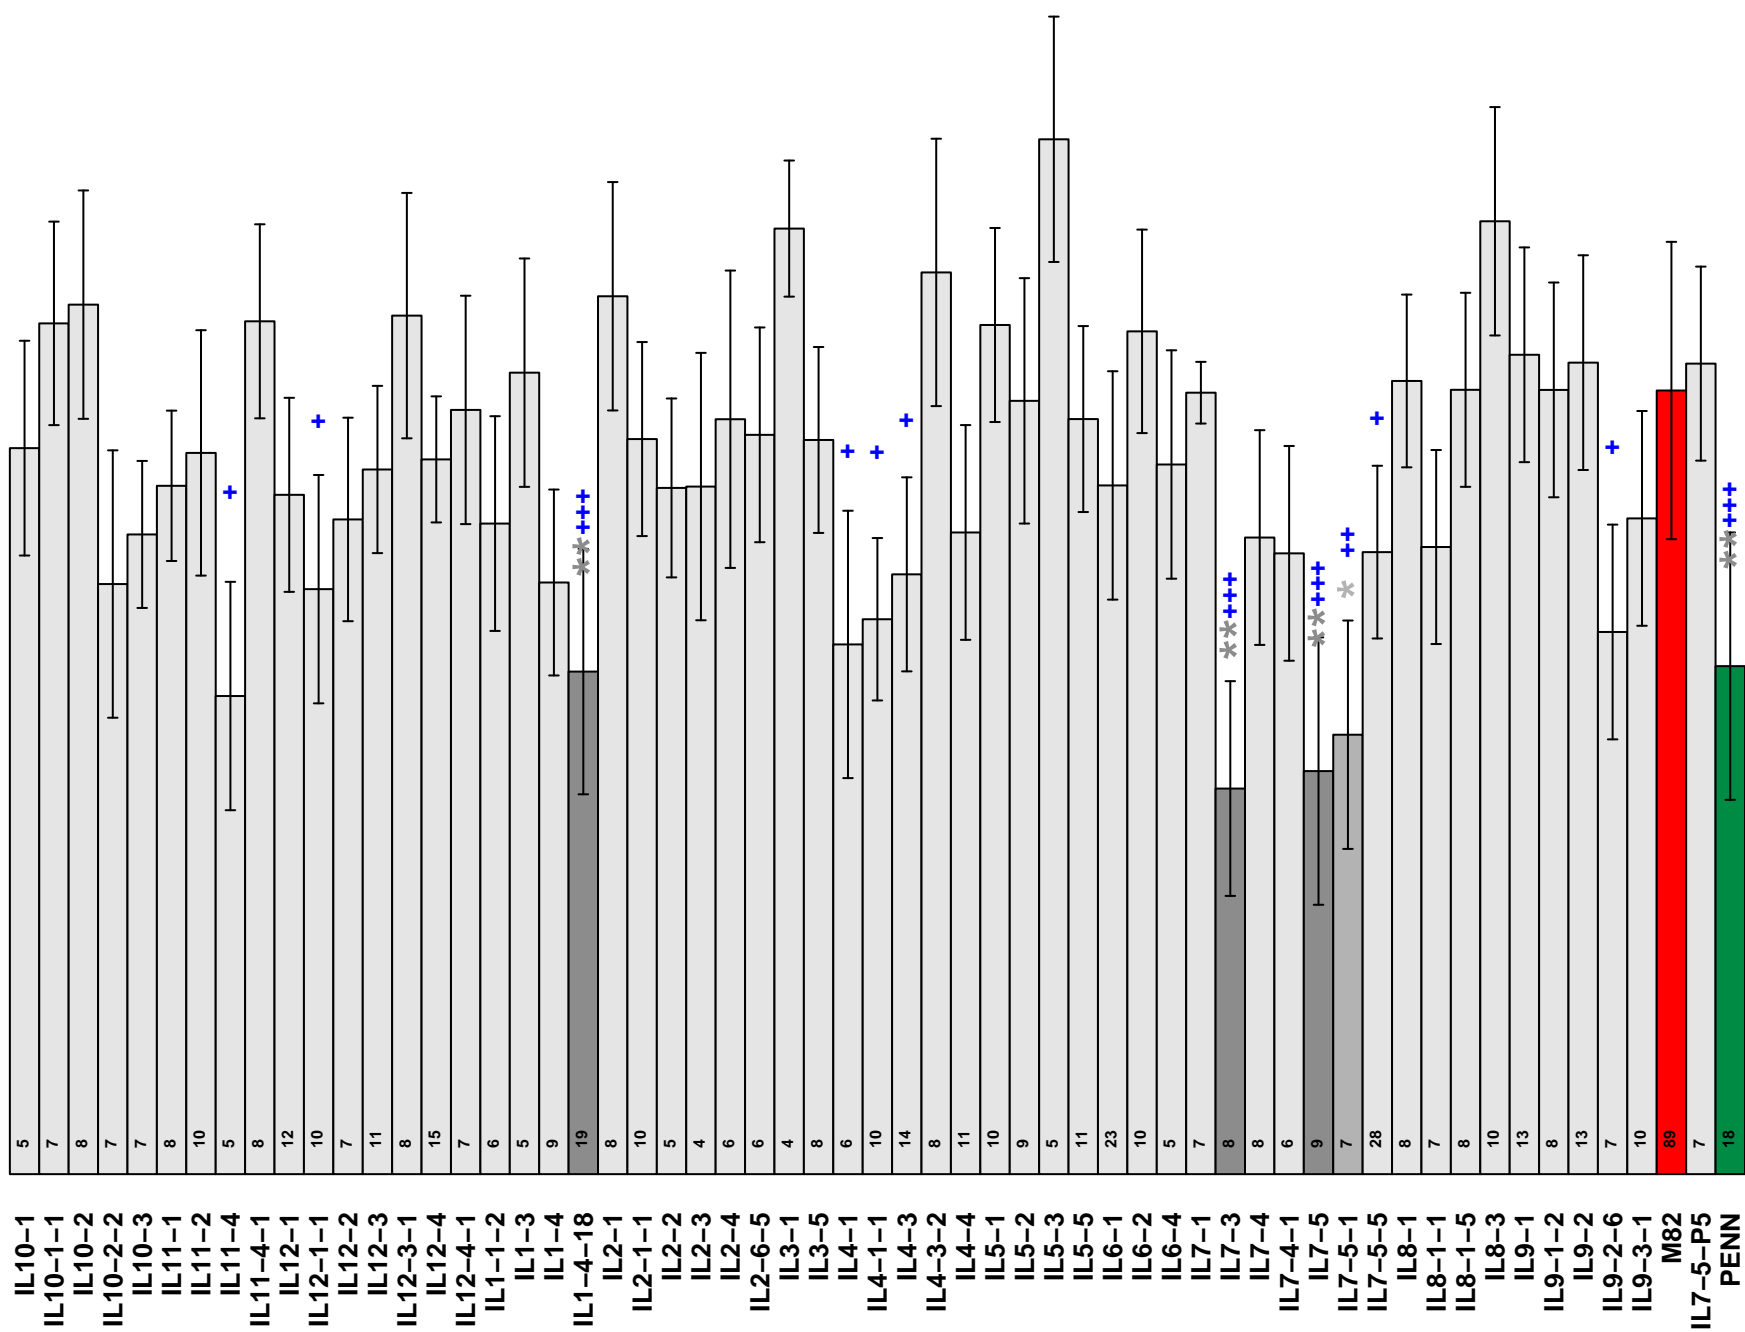

# Angle T23

degrees

60  
50  
40  
30  
20  
10  
0

+ \* p < 0.05  
++ \*\* p < 0.01  
+++ \*\*\* p < 0.001

Data filtering: >= 4 roots/IL

Bars = std. err. (sigma) from lm/glht

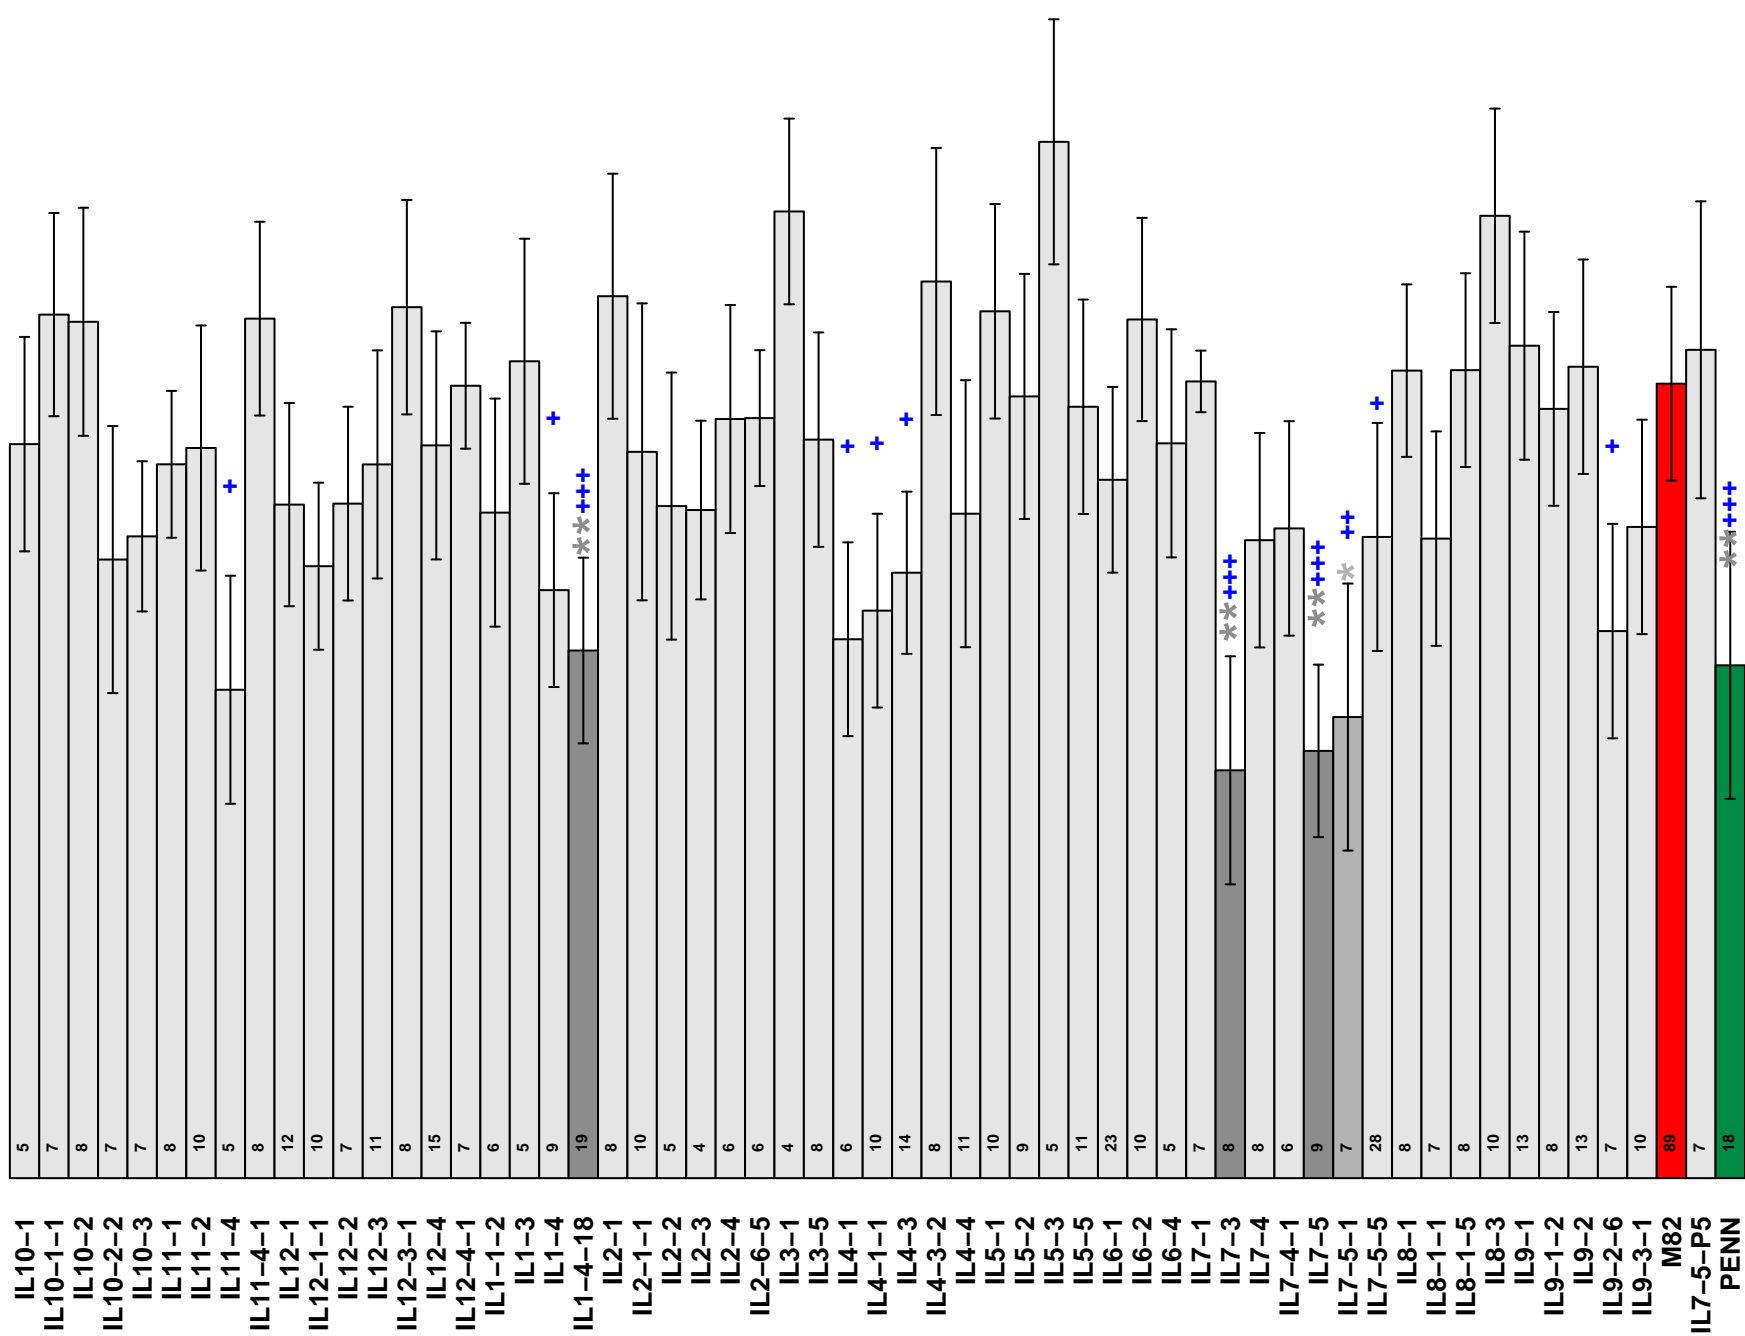



# Angle T24

degrees

60  
50  
40  
30  
20  
10  
0

+ \*  $p < 0.05$   
++ \*\*  $p < 0.01$   
+++ \*\*\*  $p < 0.001$

Data filtering:  $\geq 4$  roots/IL

Bars = std. err. (sigma) from lm/glht

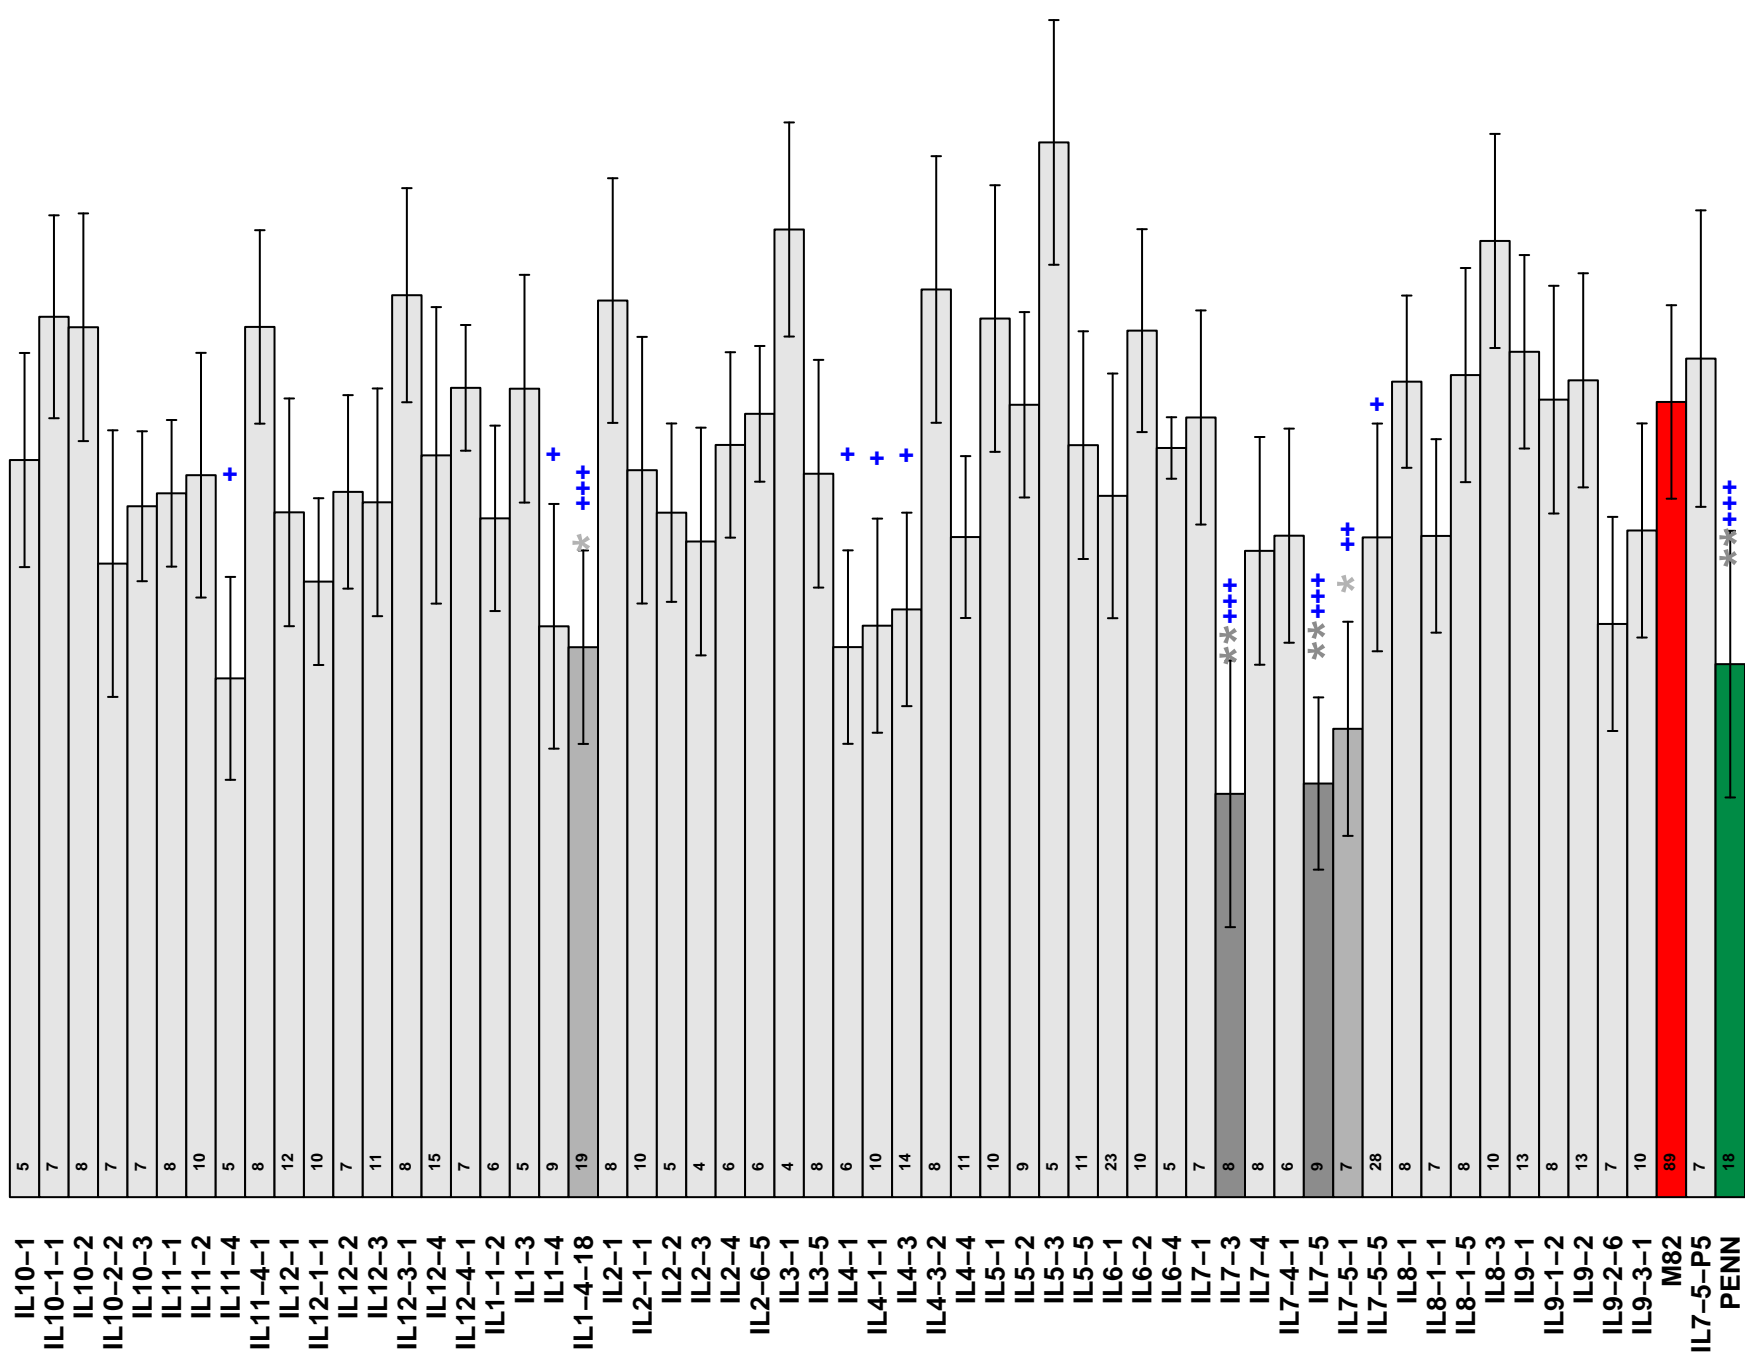

# Angle T25

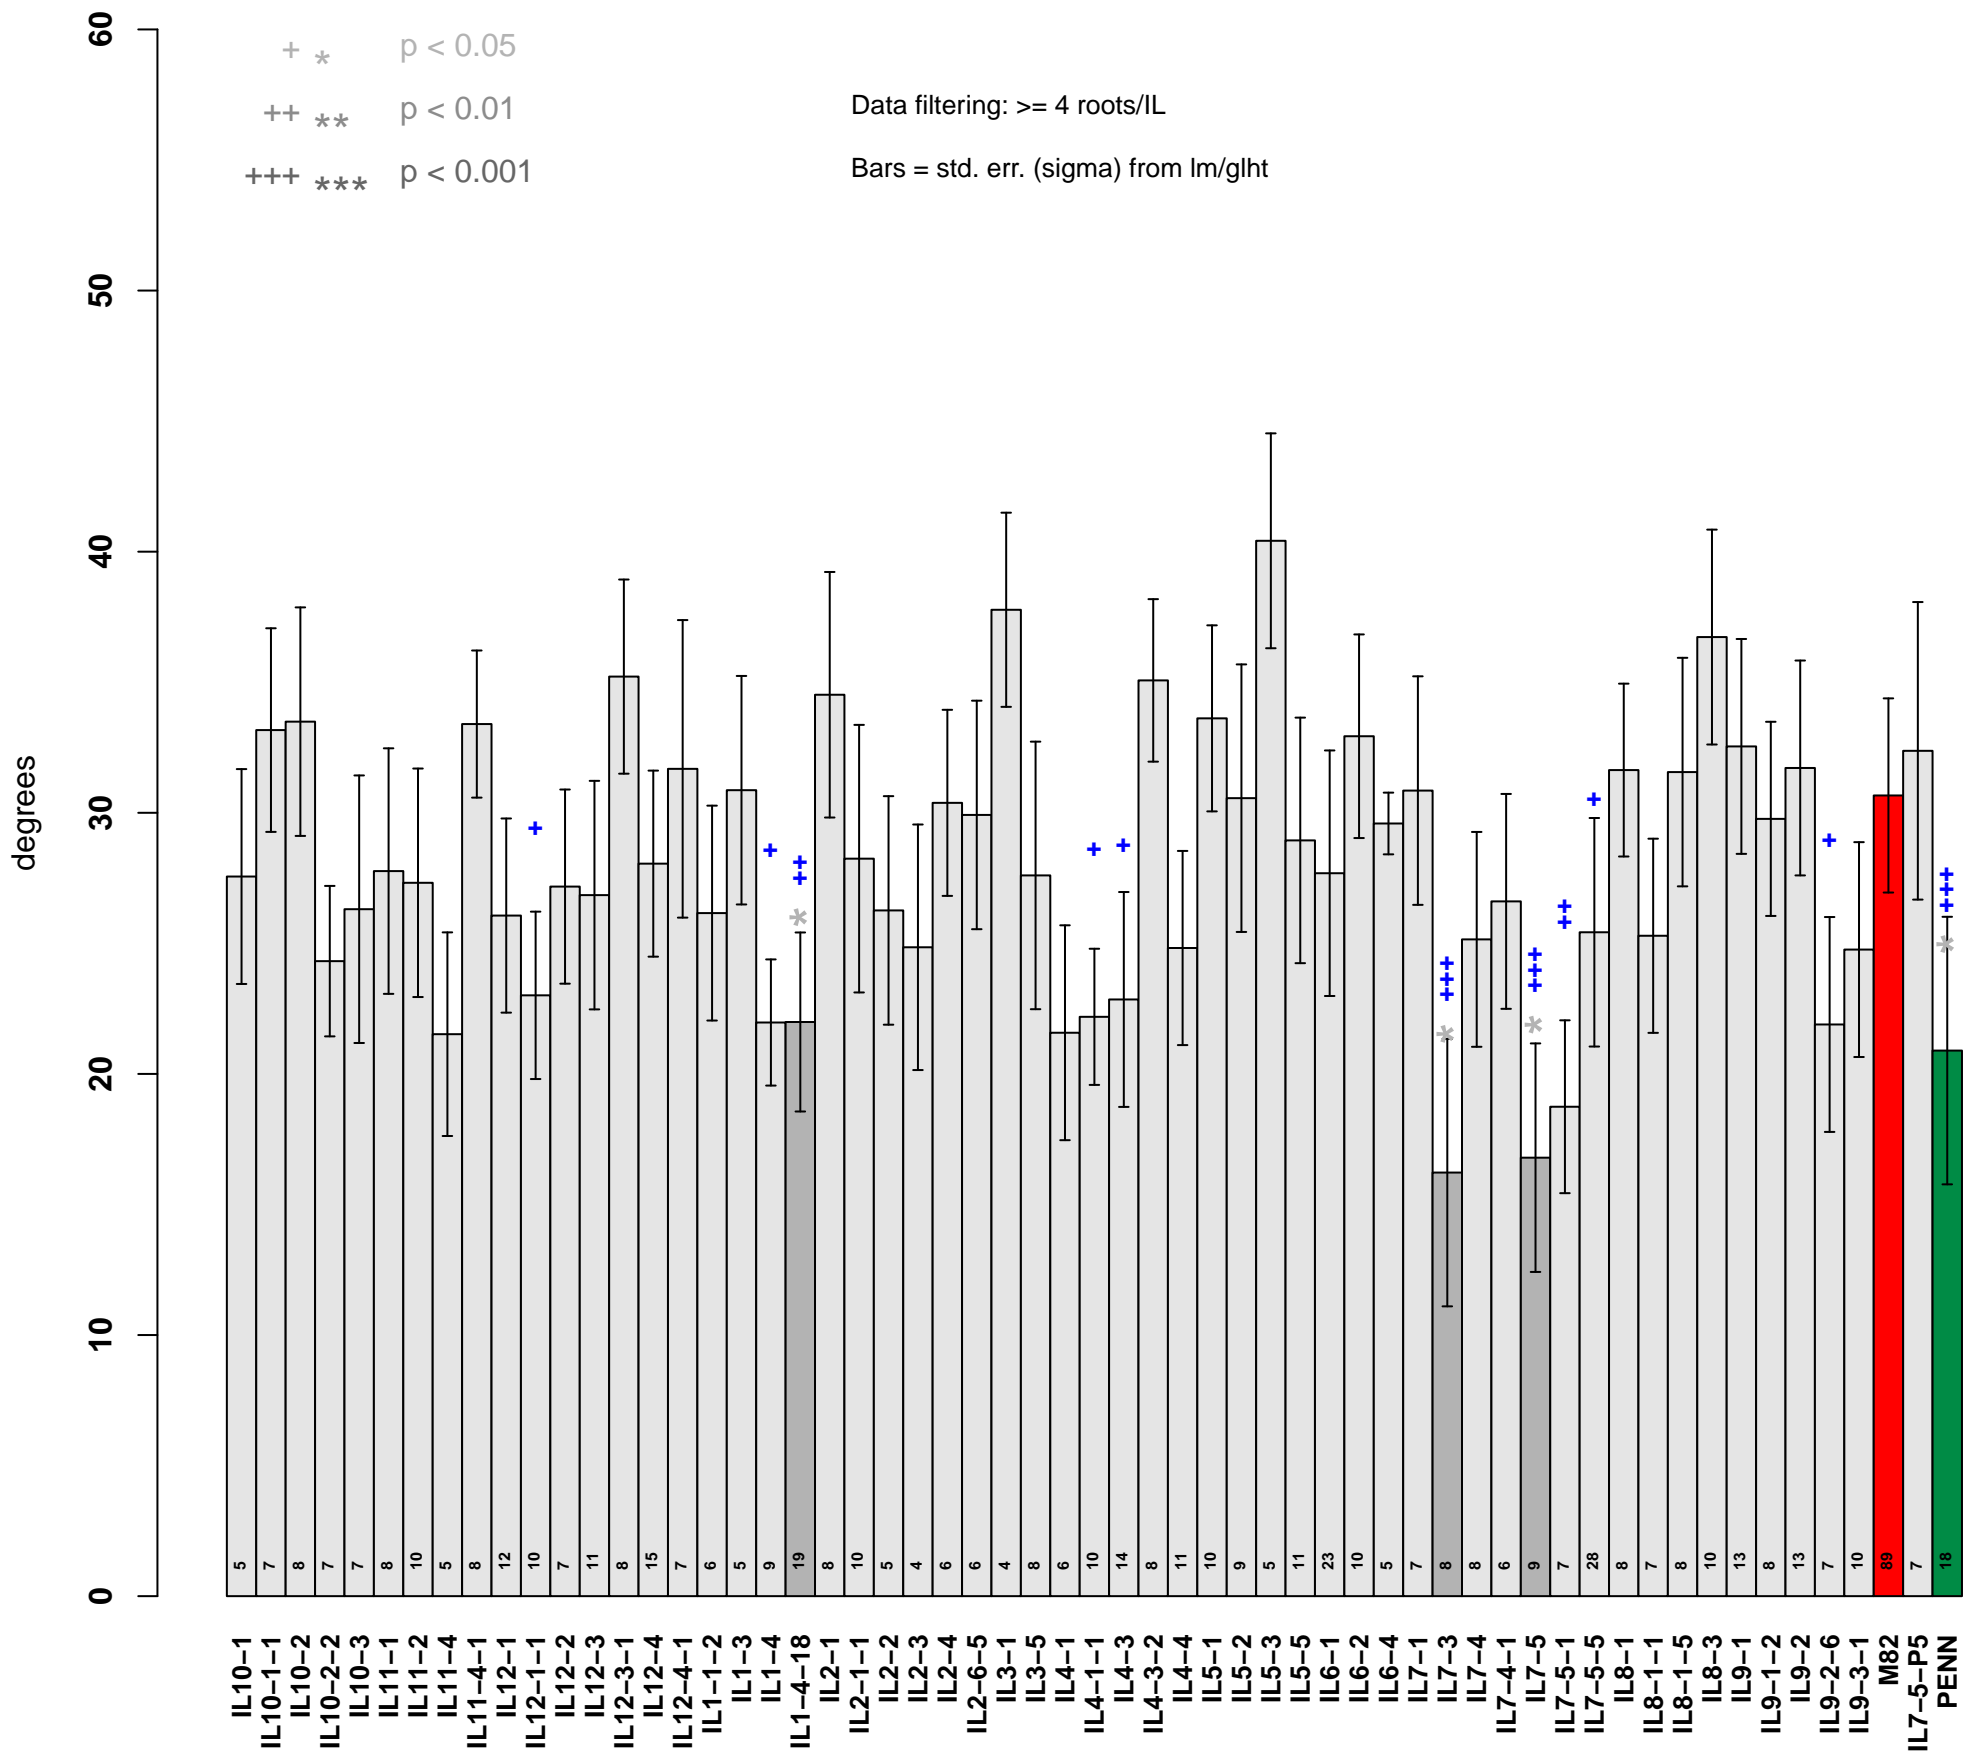

# Angle T26

degrees

60  
50  
40  
30  
20  
10  
0

+ \*  $p < 0.05$   
++ \*\*  $p < 0.01$   
+++ \*\*\*  $p < 0.001$

Data filtering:  $\geq 4$  roots/IL

Bars = std. err. (sigma) from lm/glht

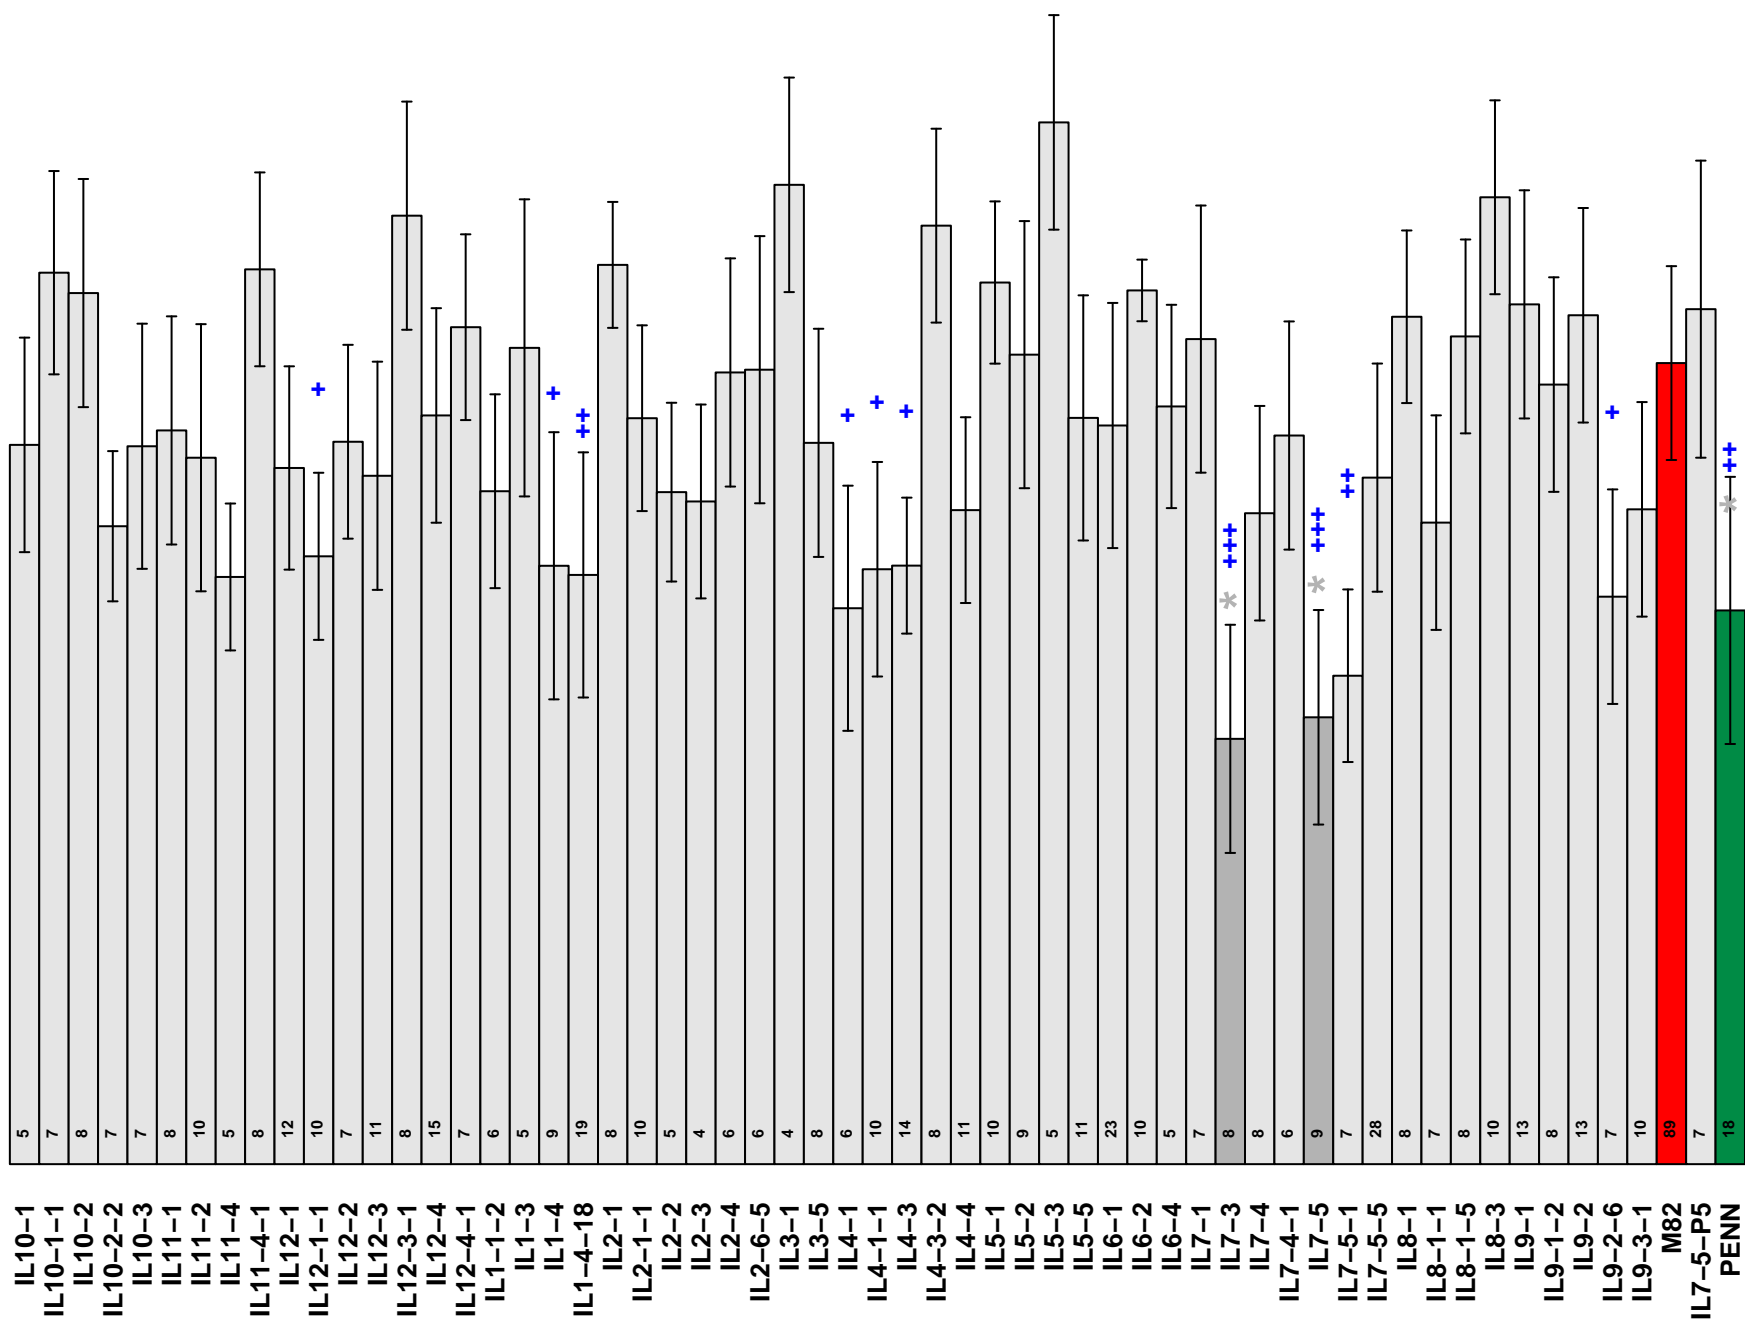

# Angle T27

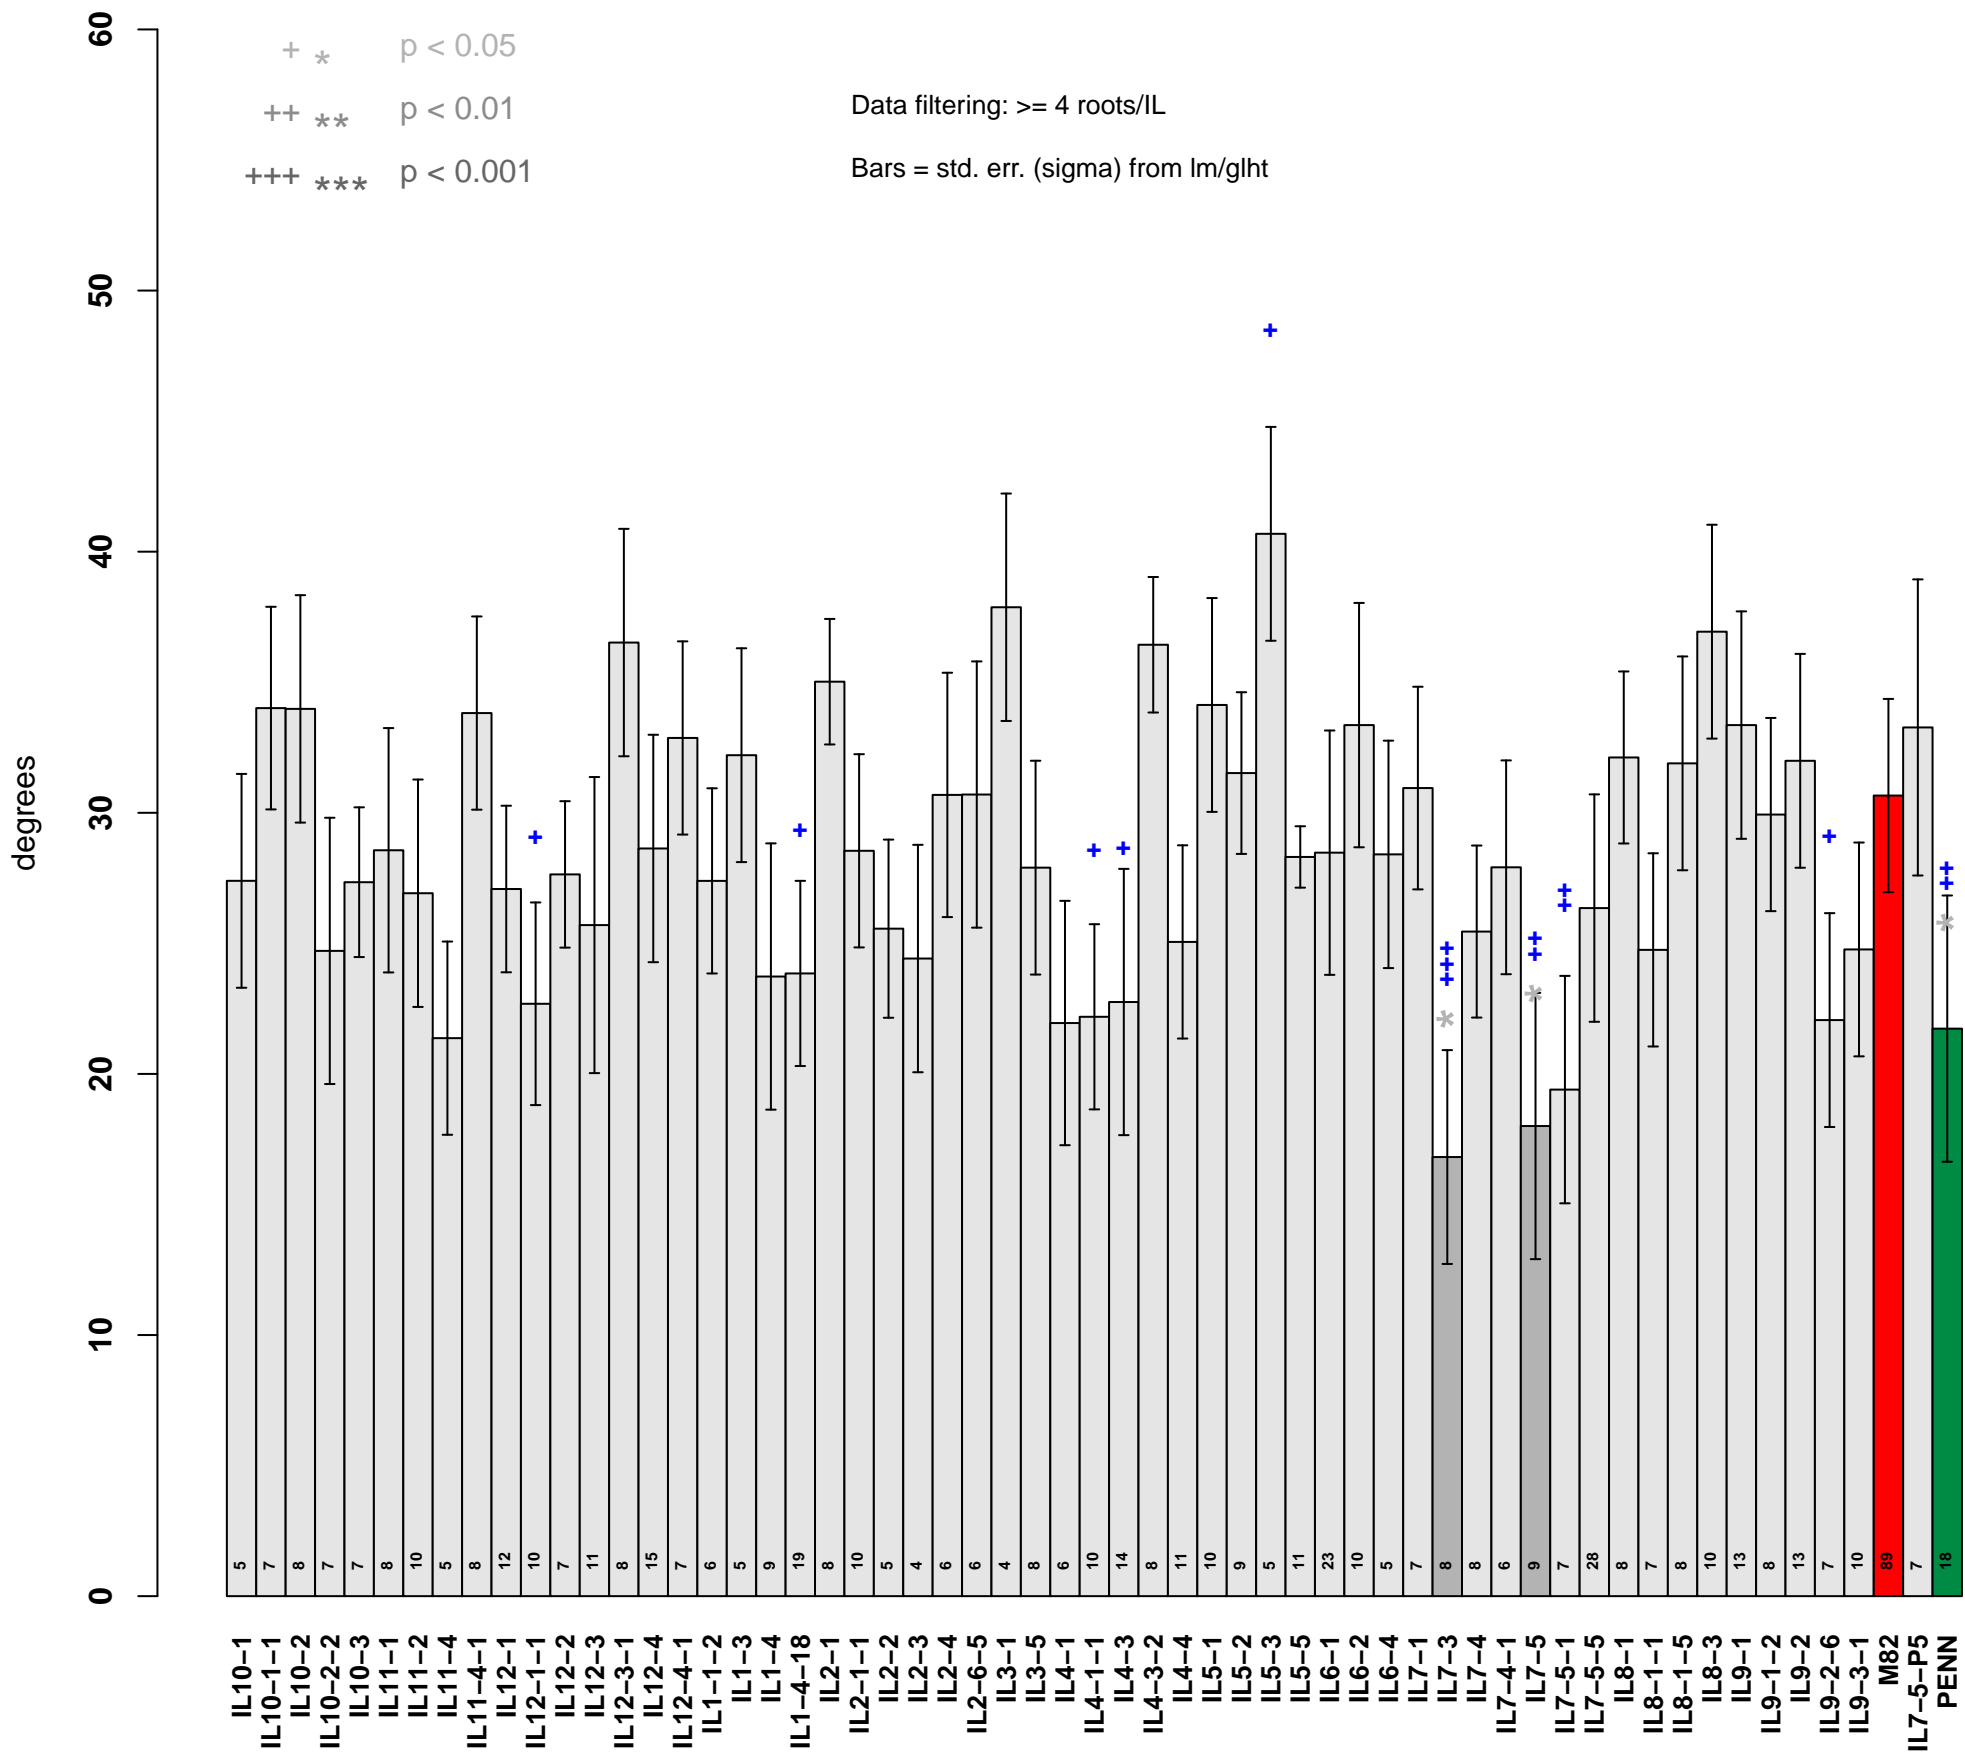

# Angle T28

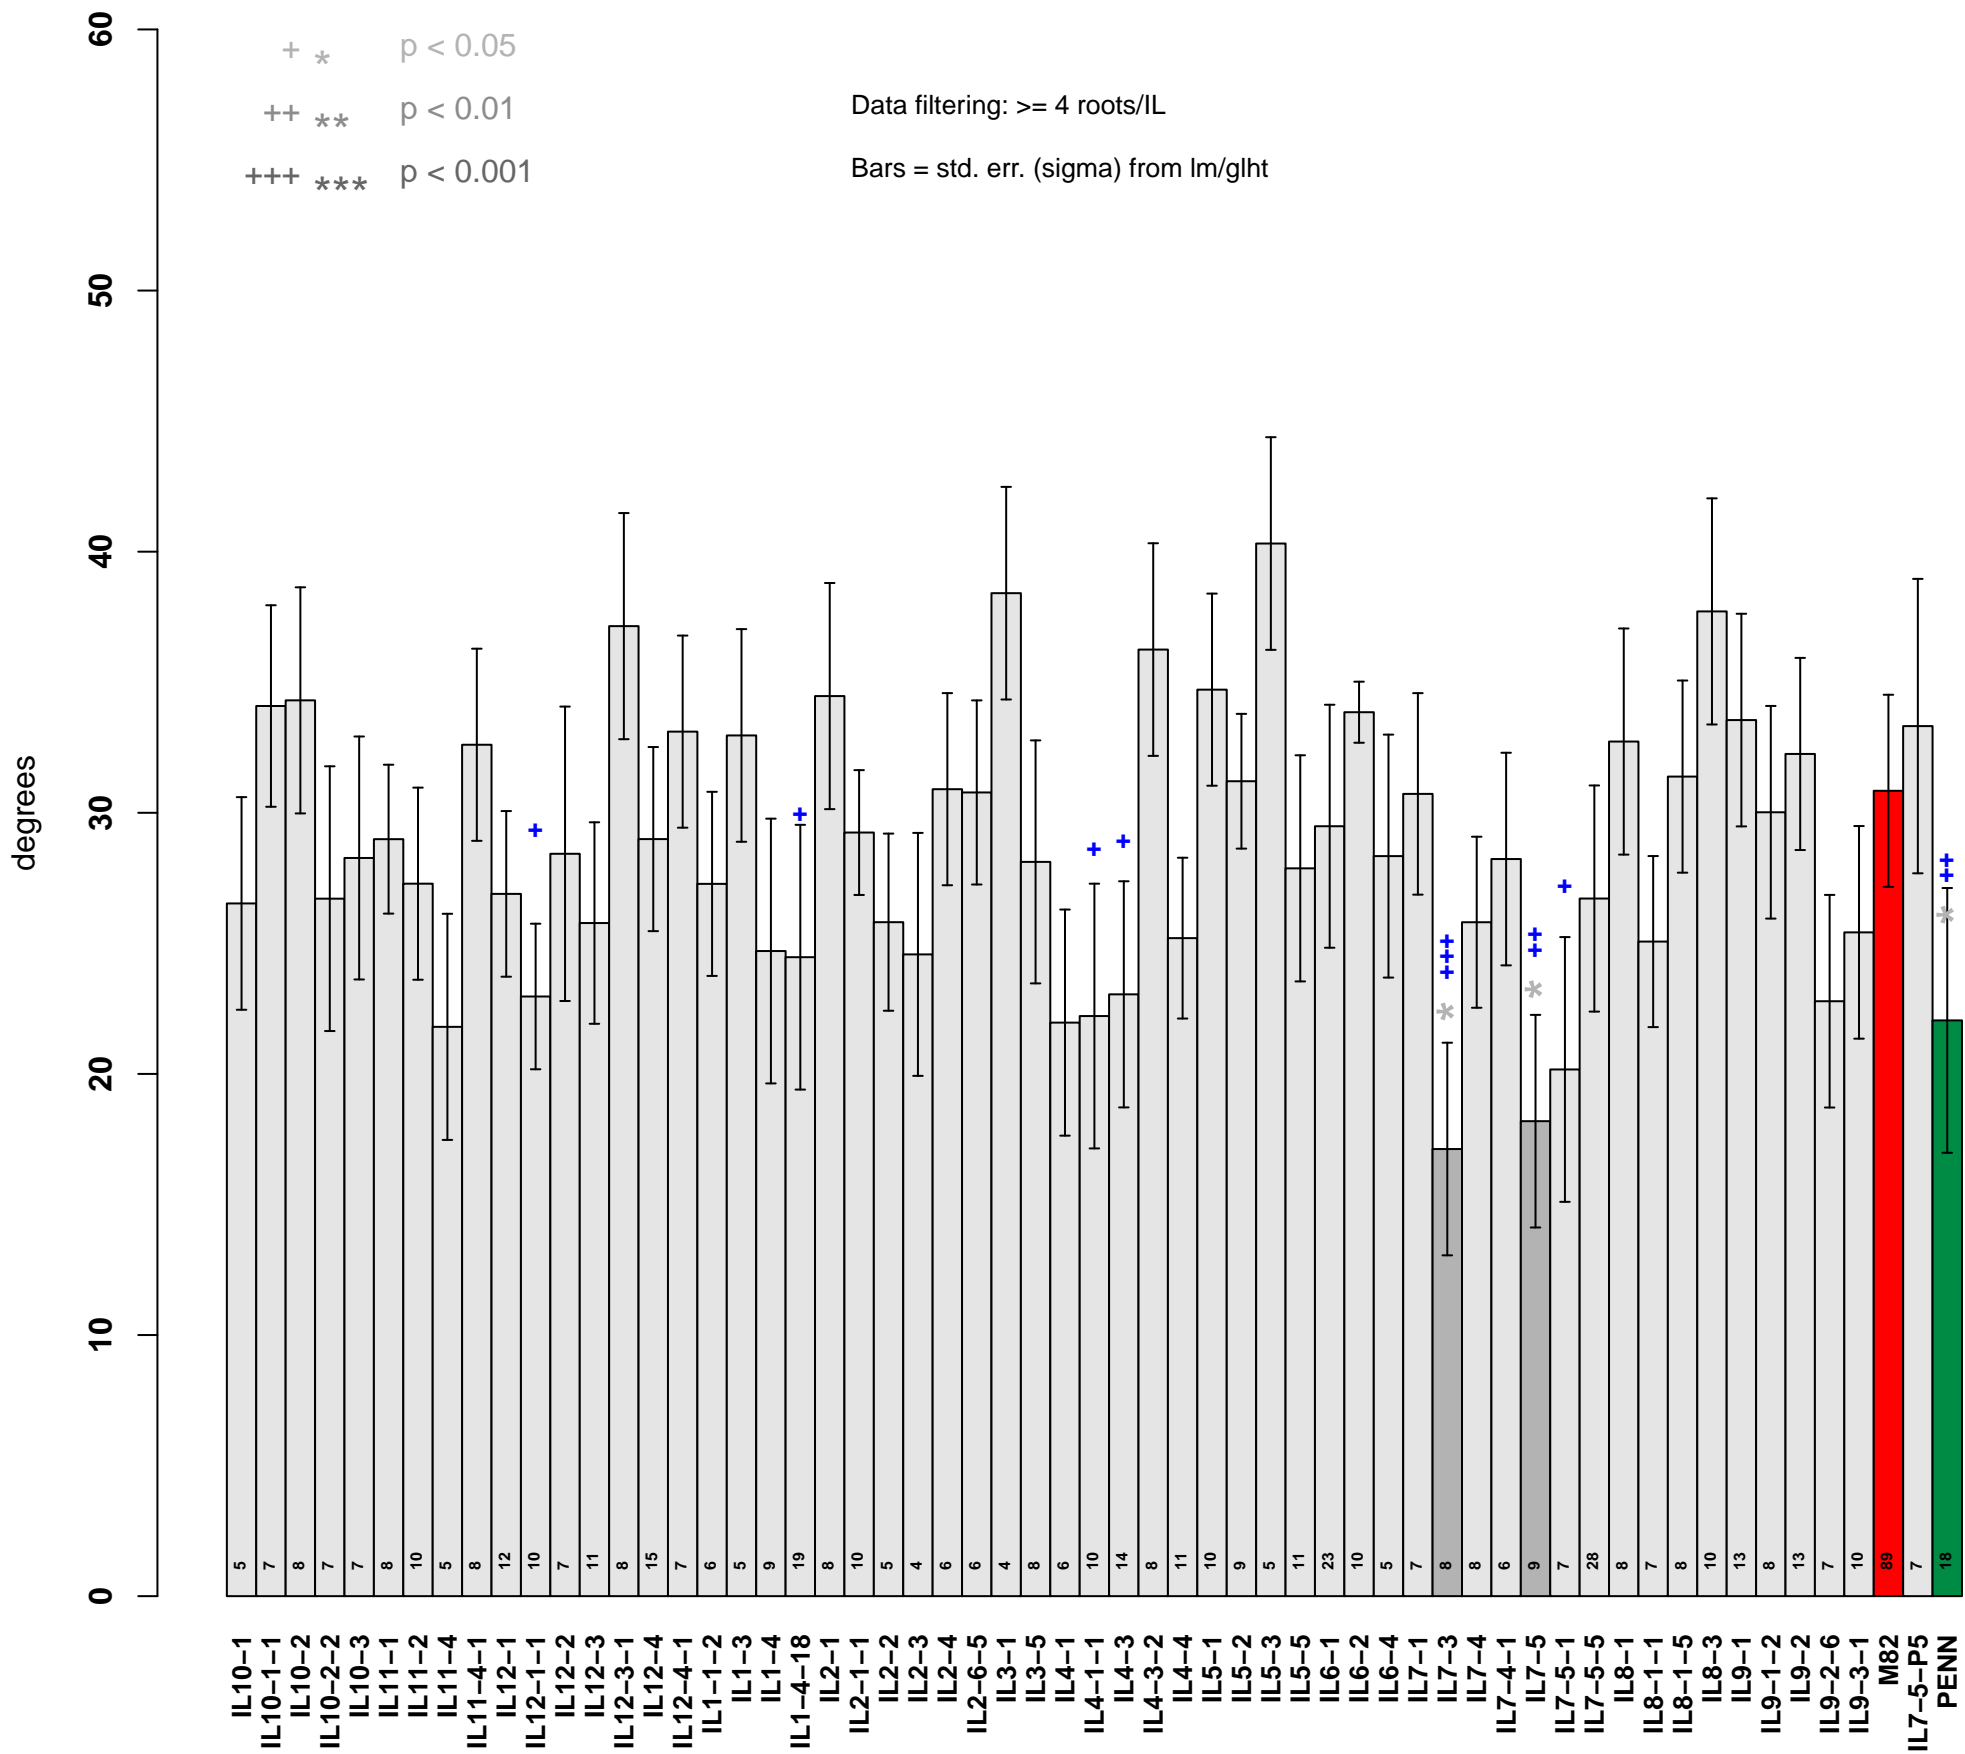

# Angle T29

degrees

60  
50  
40  
30  
20  
10  
0

+ \*  $p < 0.05$   
++ \*\*  $p < 0.01$   
+++ \*\*\*  $p < 0.001$

Data filtering:  $\geq 4$  roots/IL

Bars = std. err. (sigma) from lm/glht

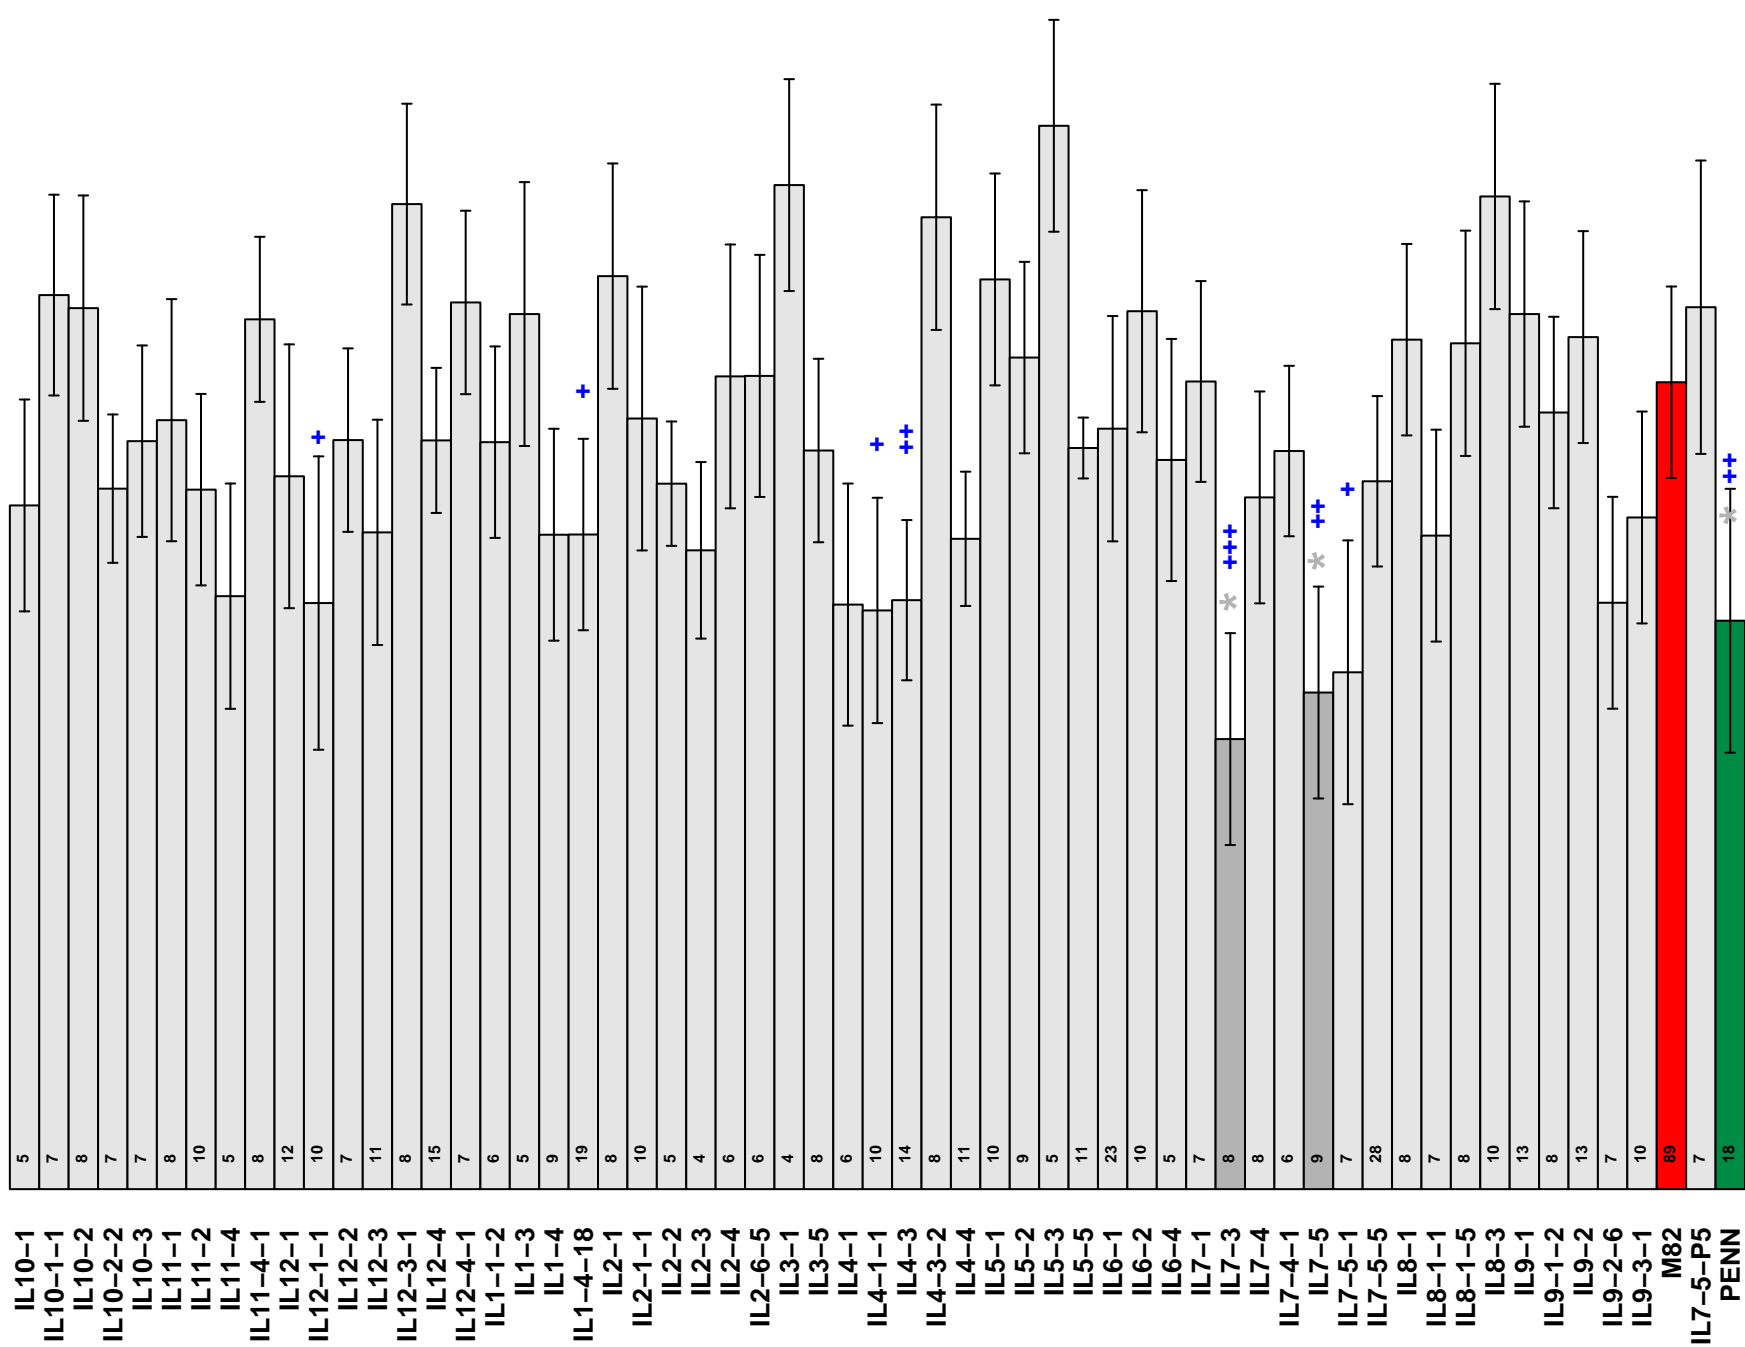

# Angle T30

degrees

60  
50  
40  
30  
20  
10  
0

+ \* p < 0.05  
++ \*\* p < 0.01  
+++ \*\*\* p < 0.001

Data filtering: >= 4 roots/IL

Bars = std. err. (sigma) from lm/glht

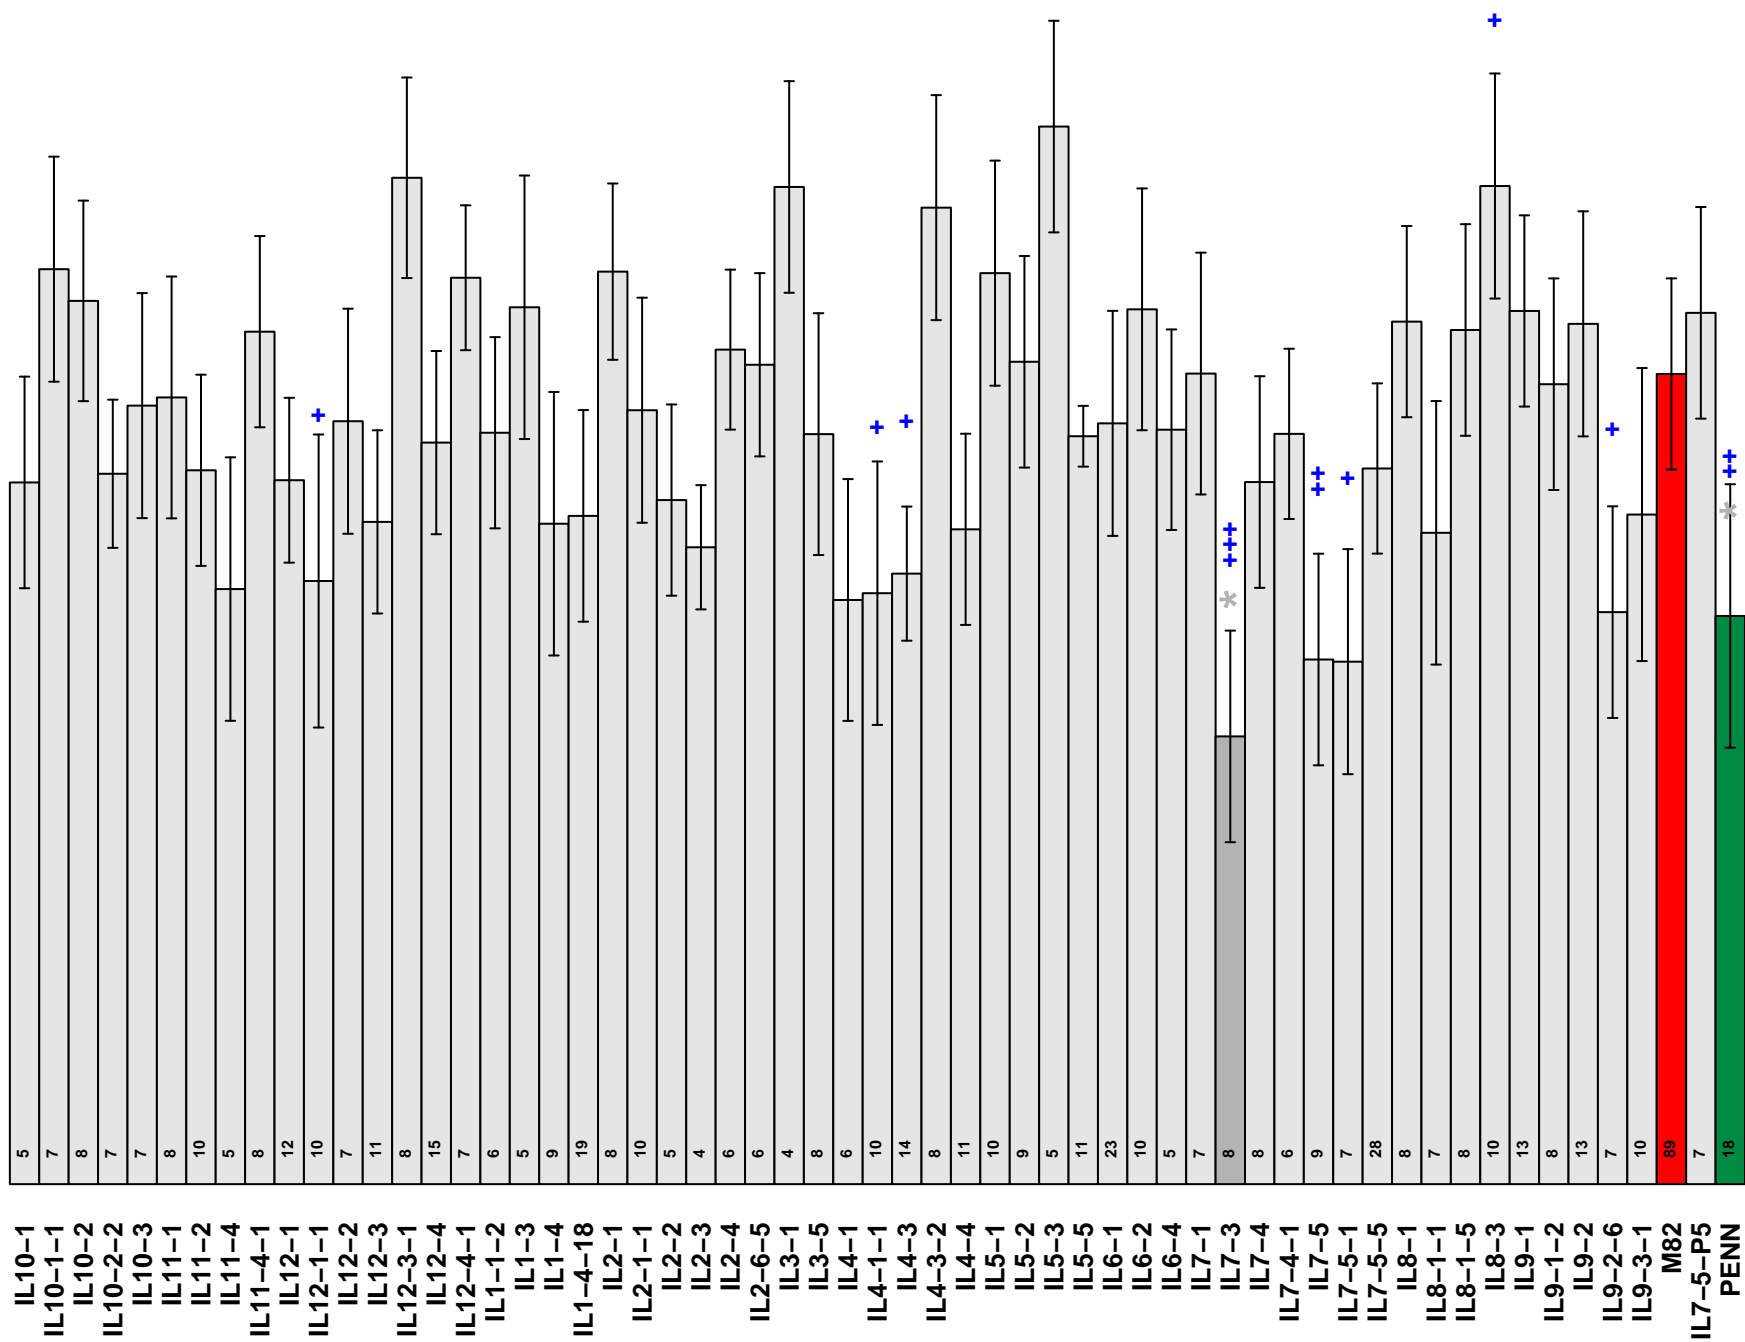

# Angle T31

degrees

60  
50  
40  
30  
20  
10  
0

+ \*  $p < 0.05$   
++ \*\*  $p < 0.01$   
+++ \*\*\*  $p < 0.001$

Data filtering:  $\geq 4$  roots/IL

Bars = std. err. (sigma) from lm/glht

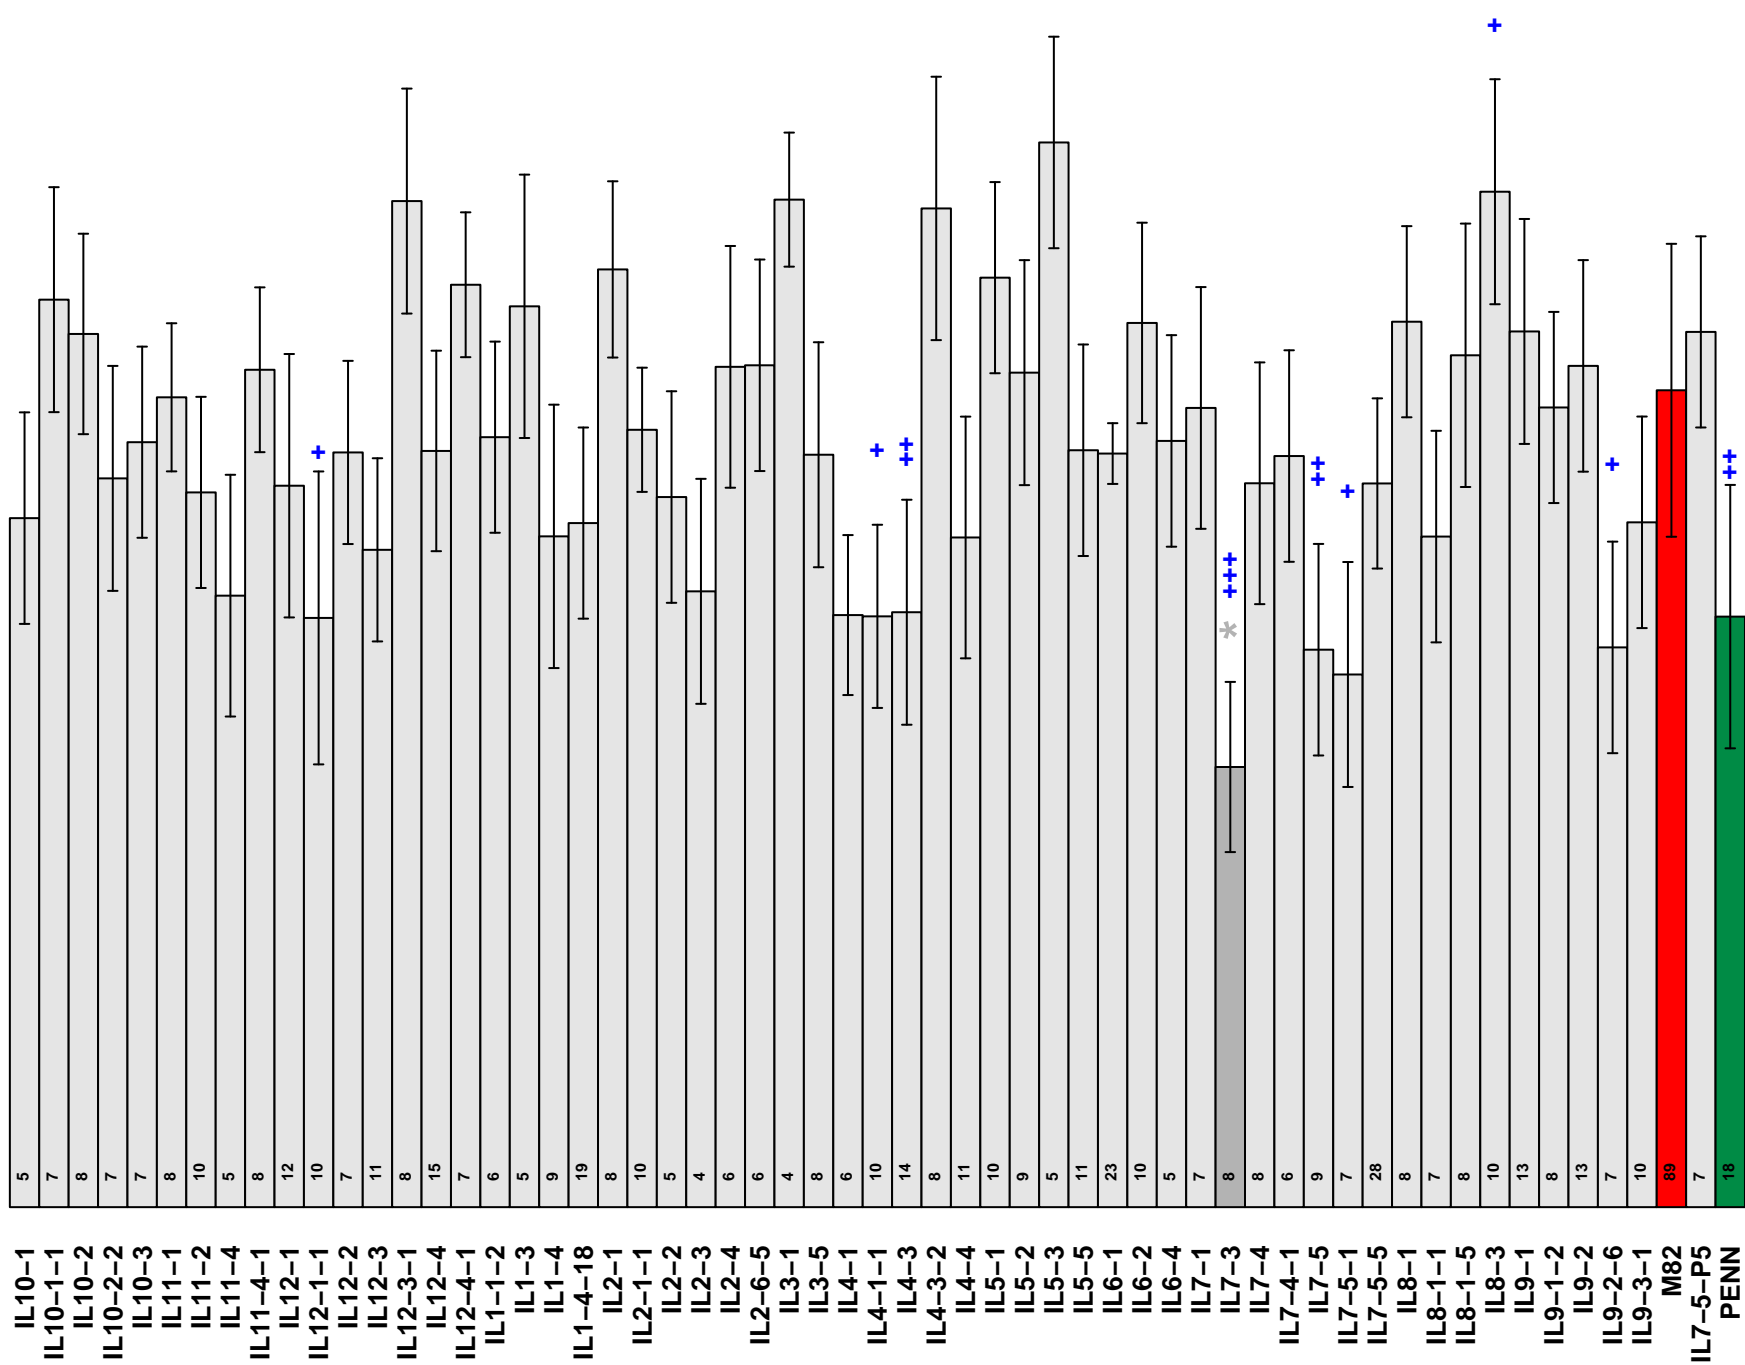



# Angle T32

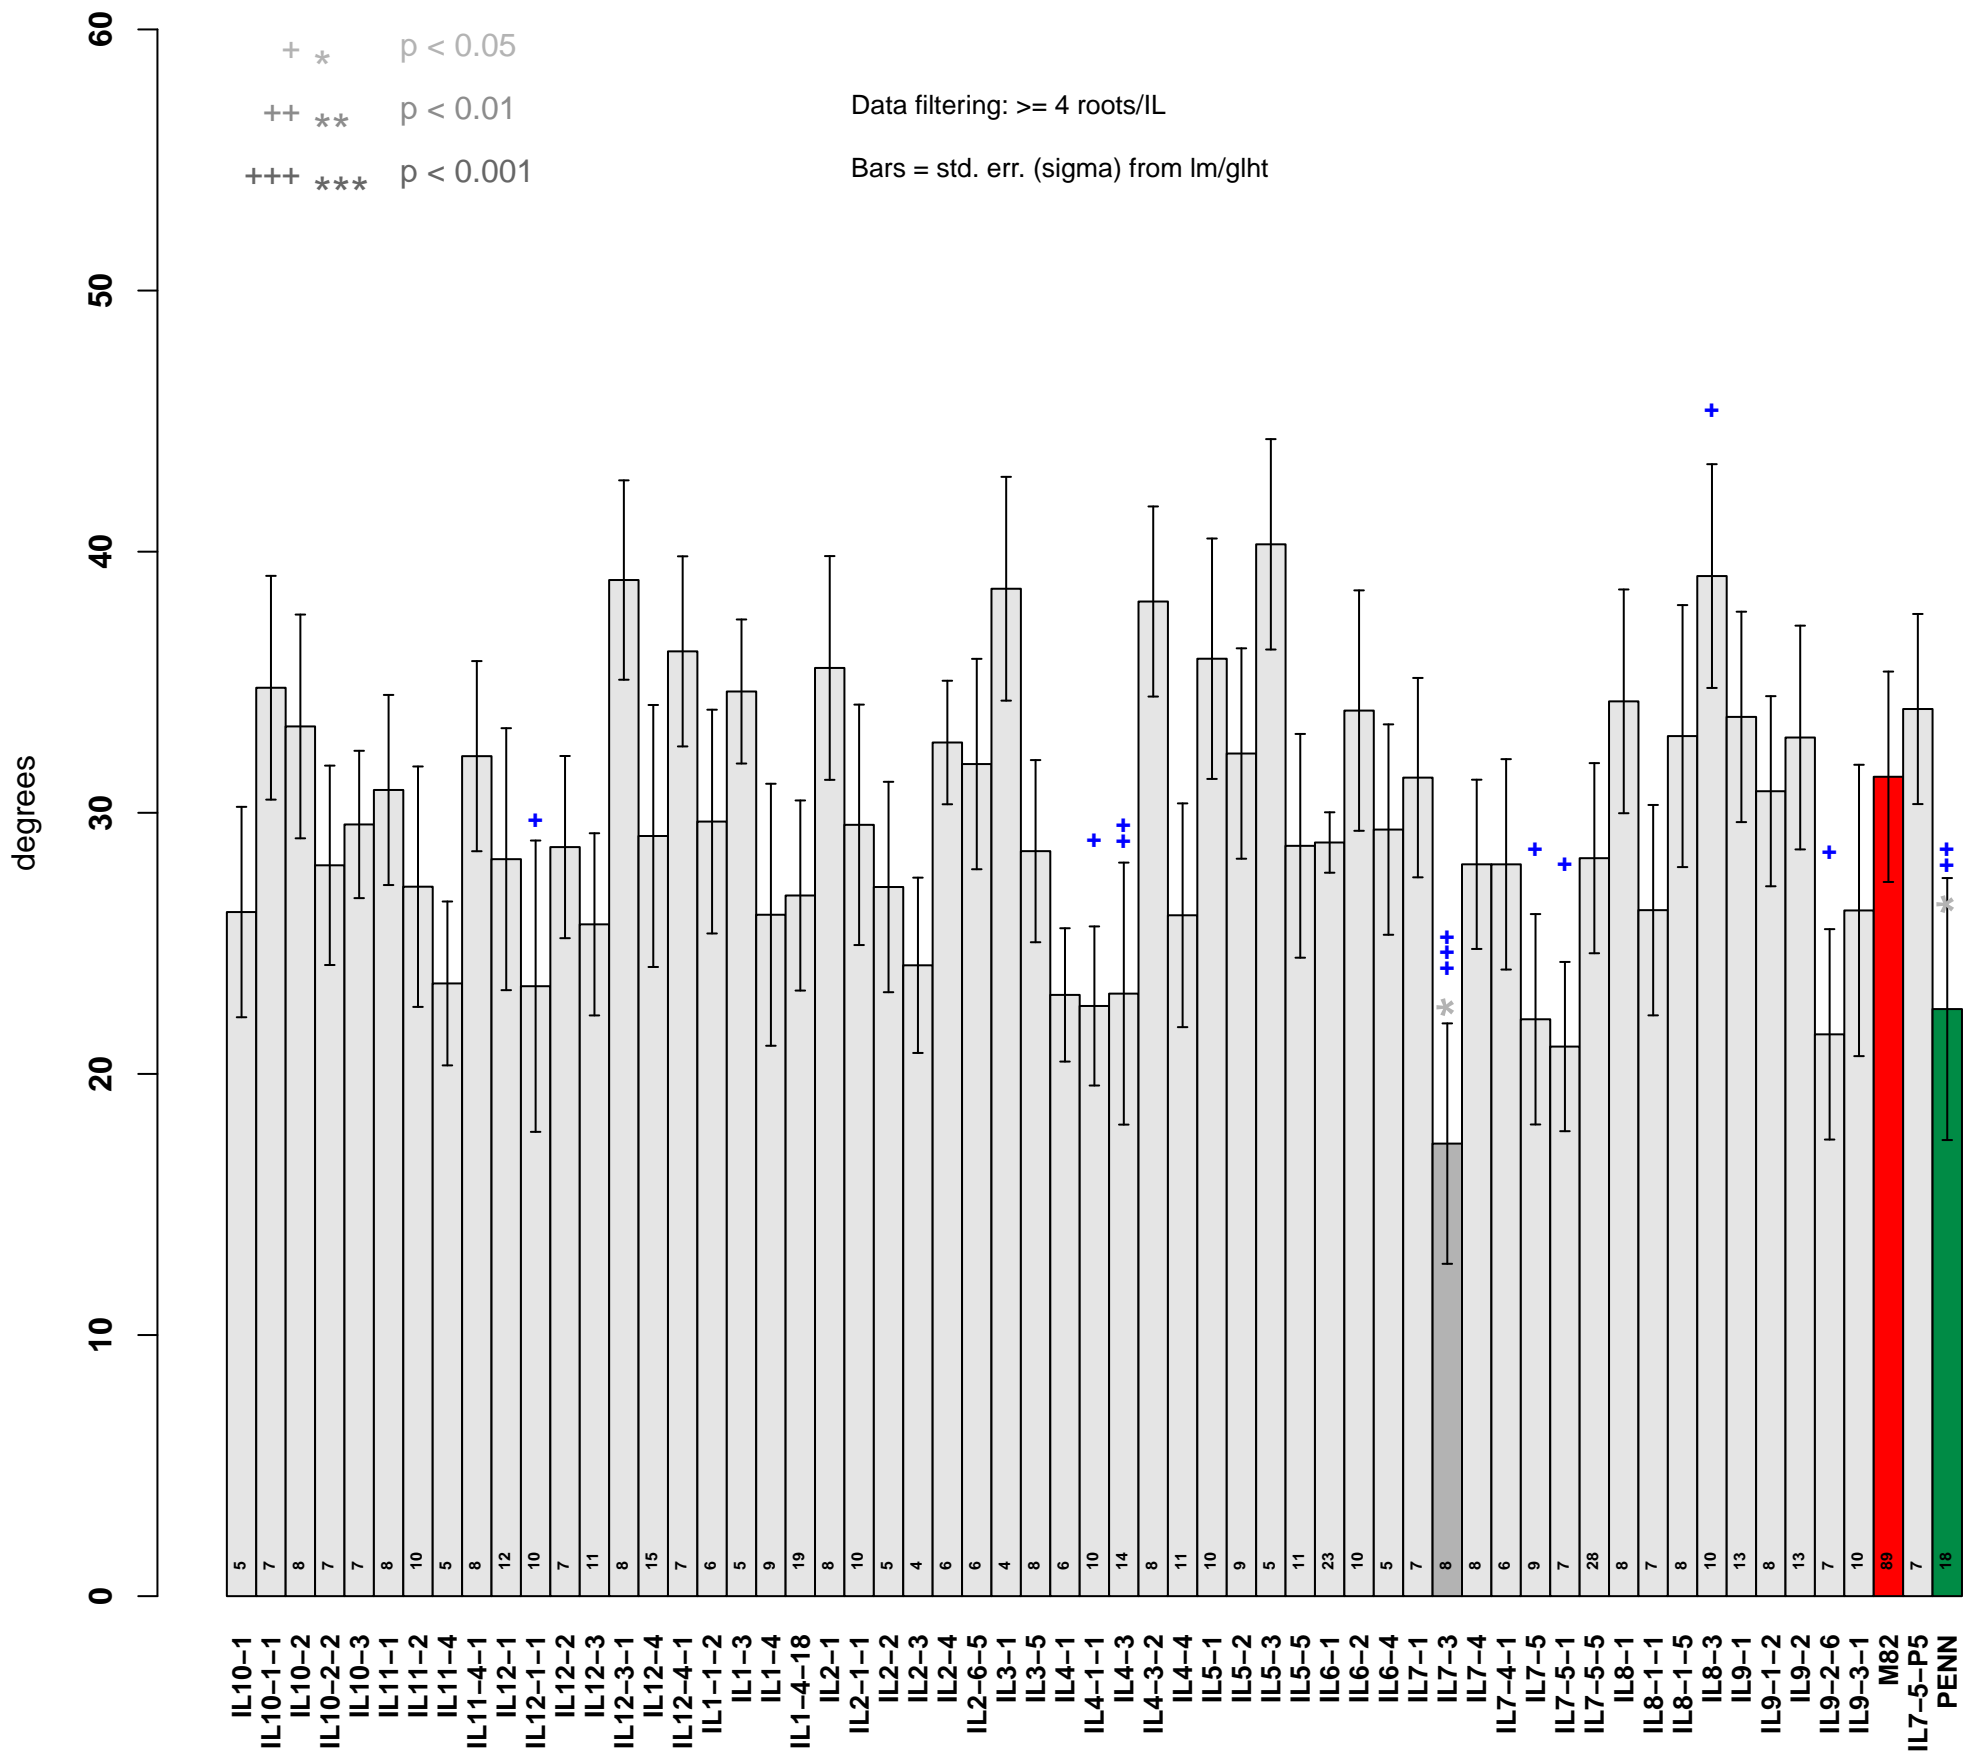

# Angle T33

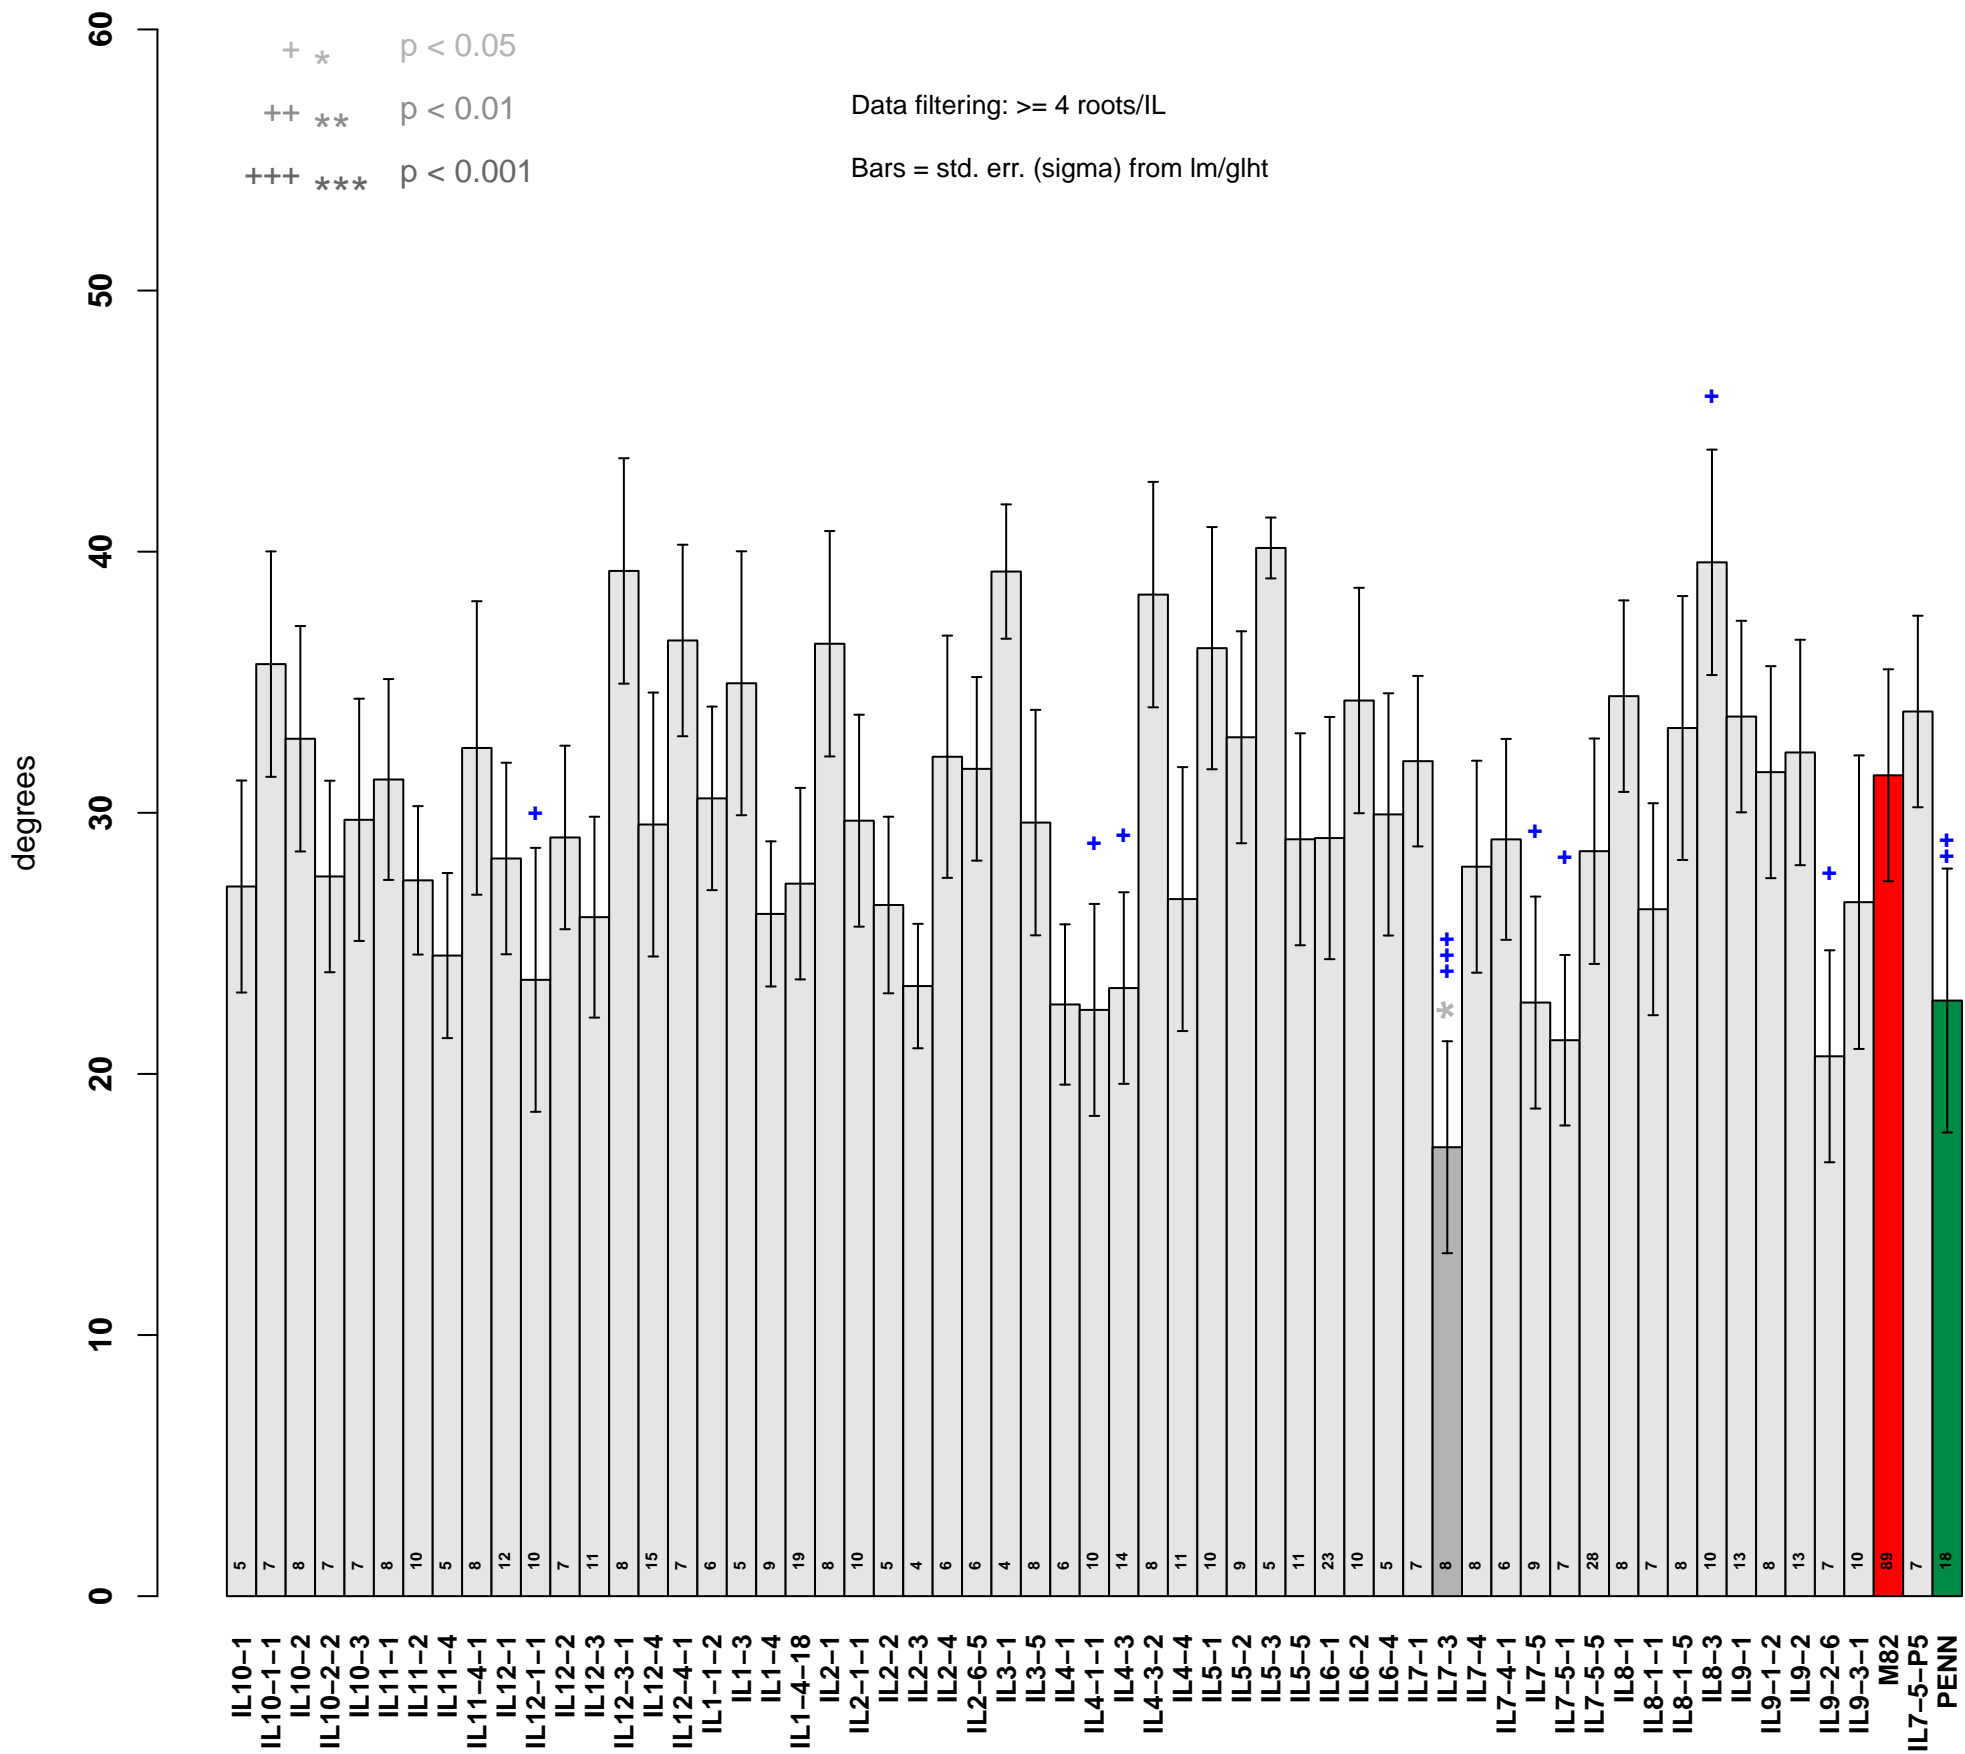

Supplement: Supplementary file 23 [file 2]
