# Supplementary material
Source: publisher figshare collection journal article supplement (https://gsajournals.figshare.com/articles/dataset/_/7237562)

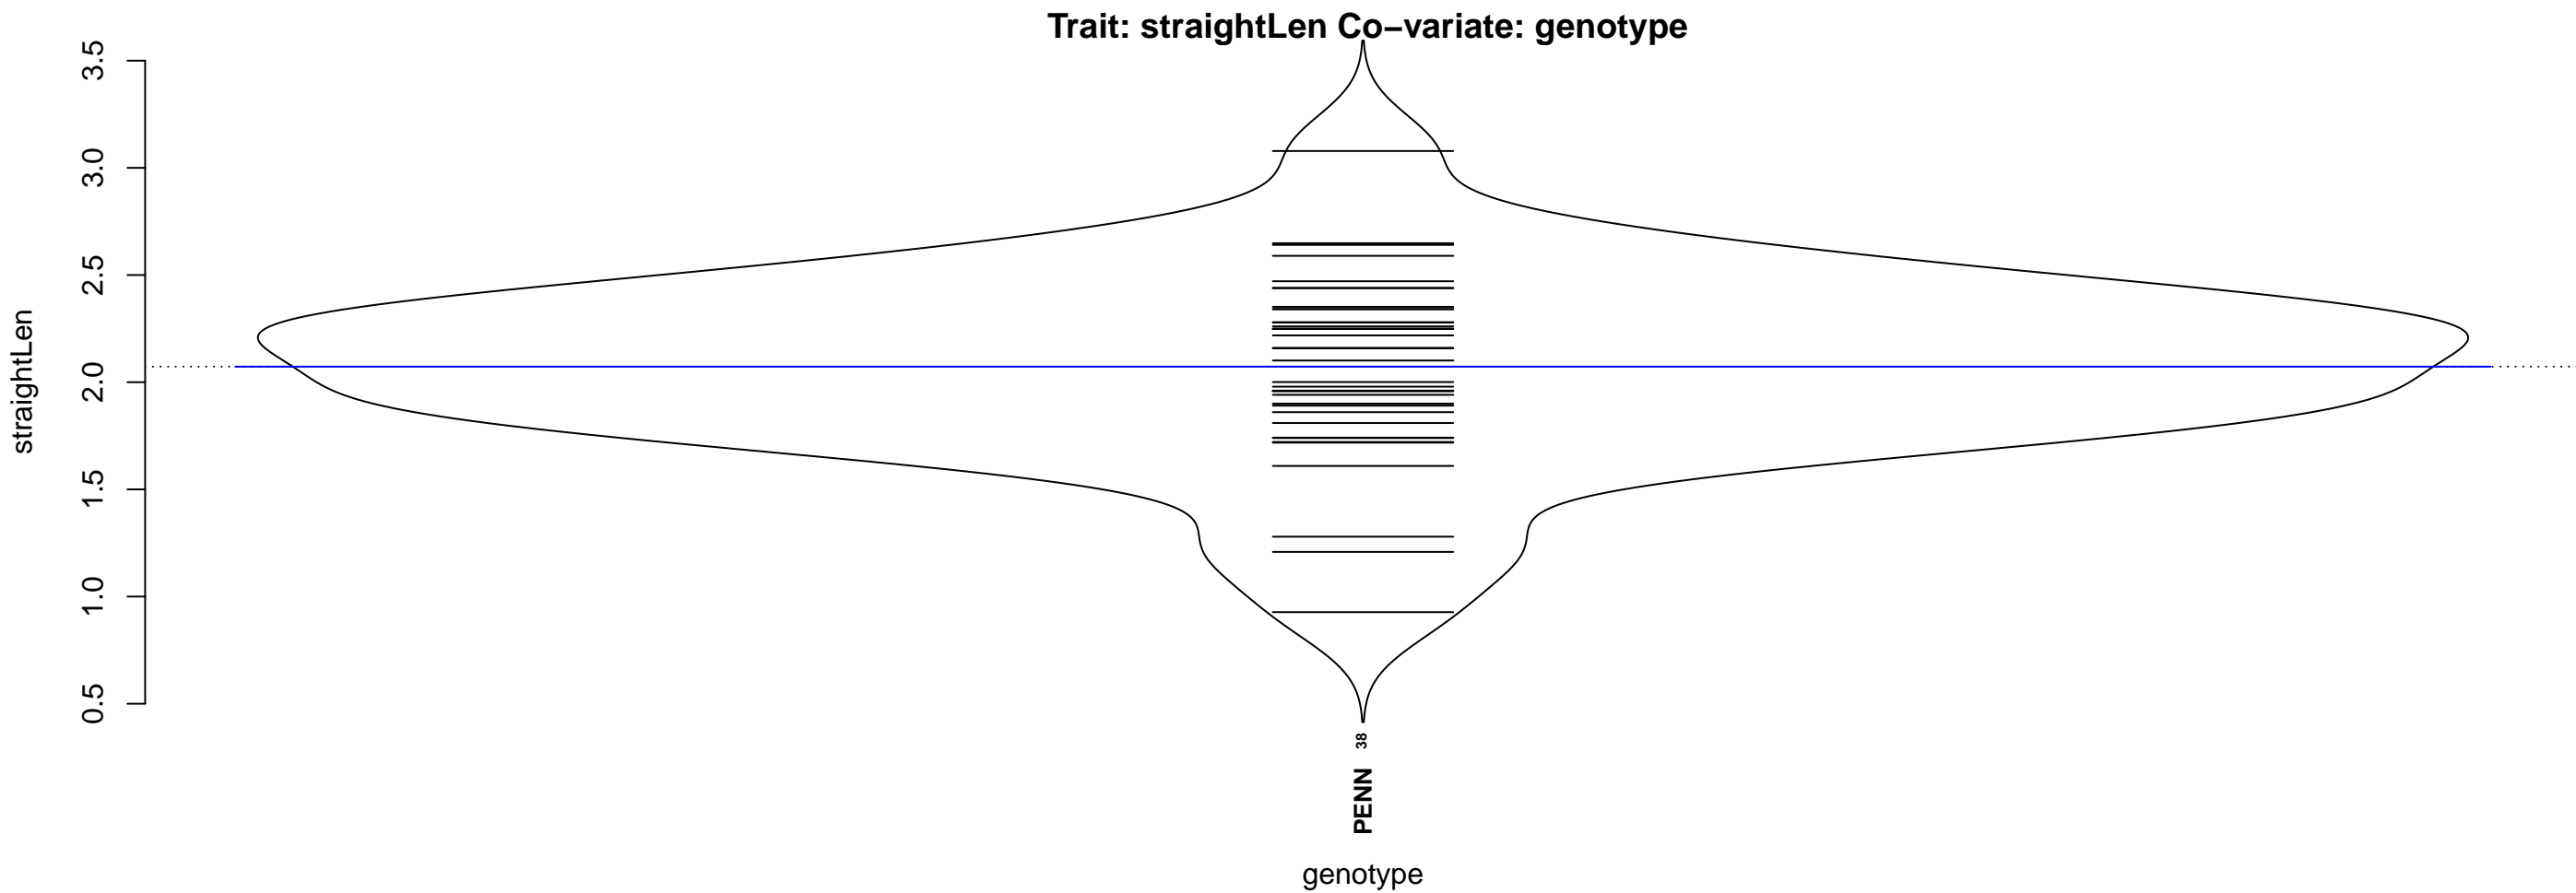

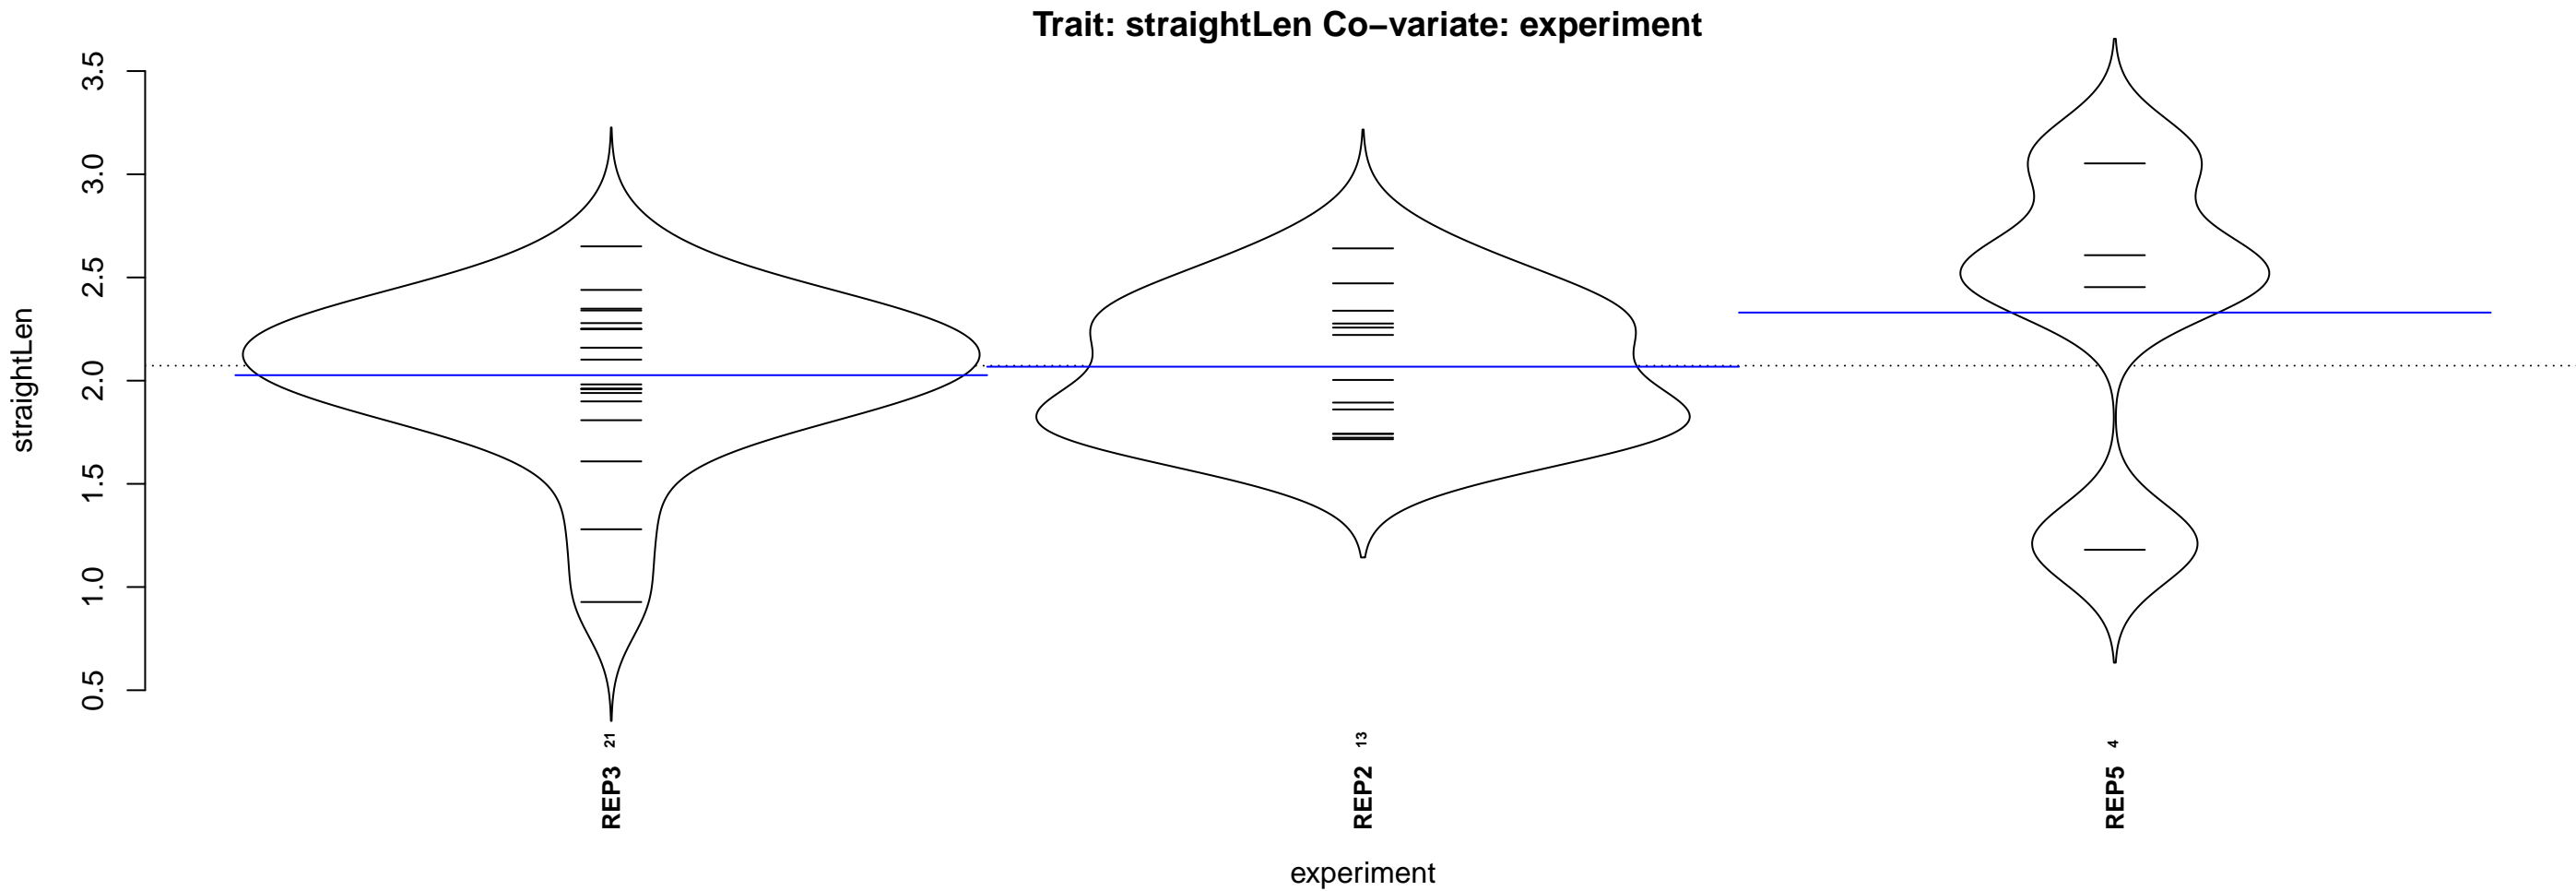

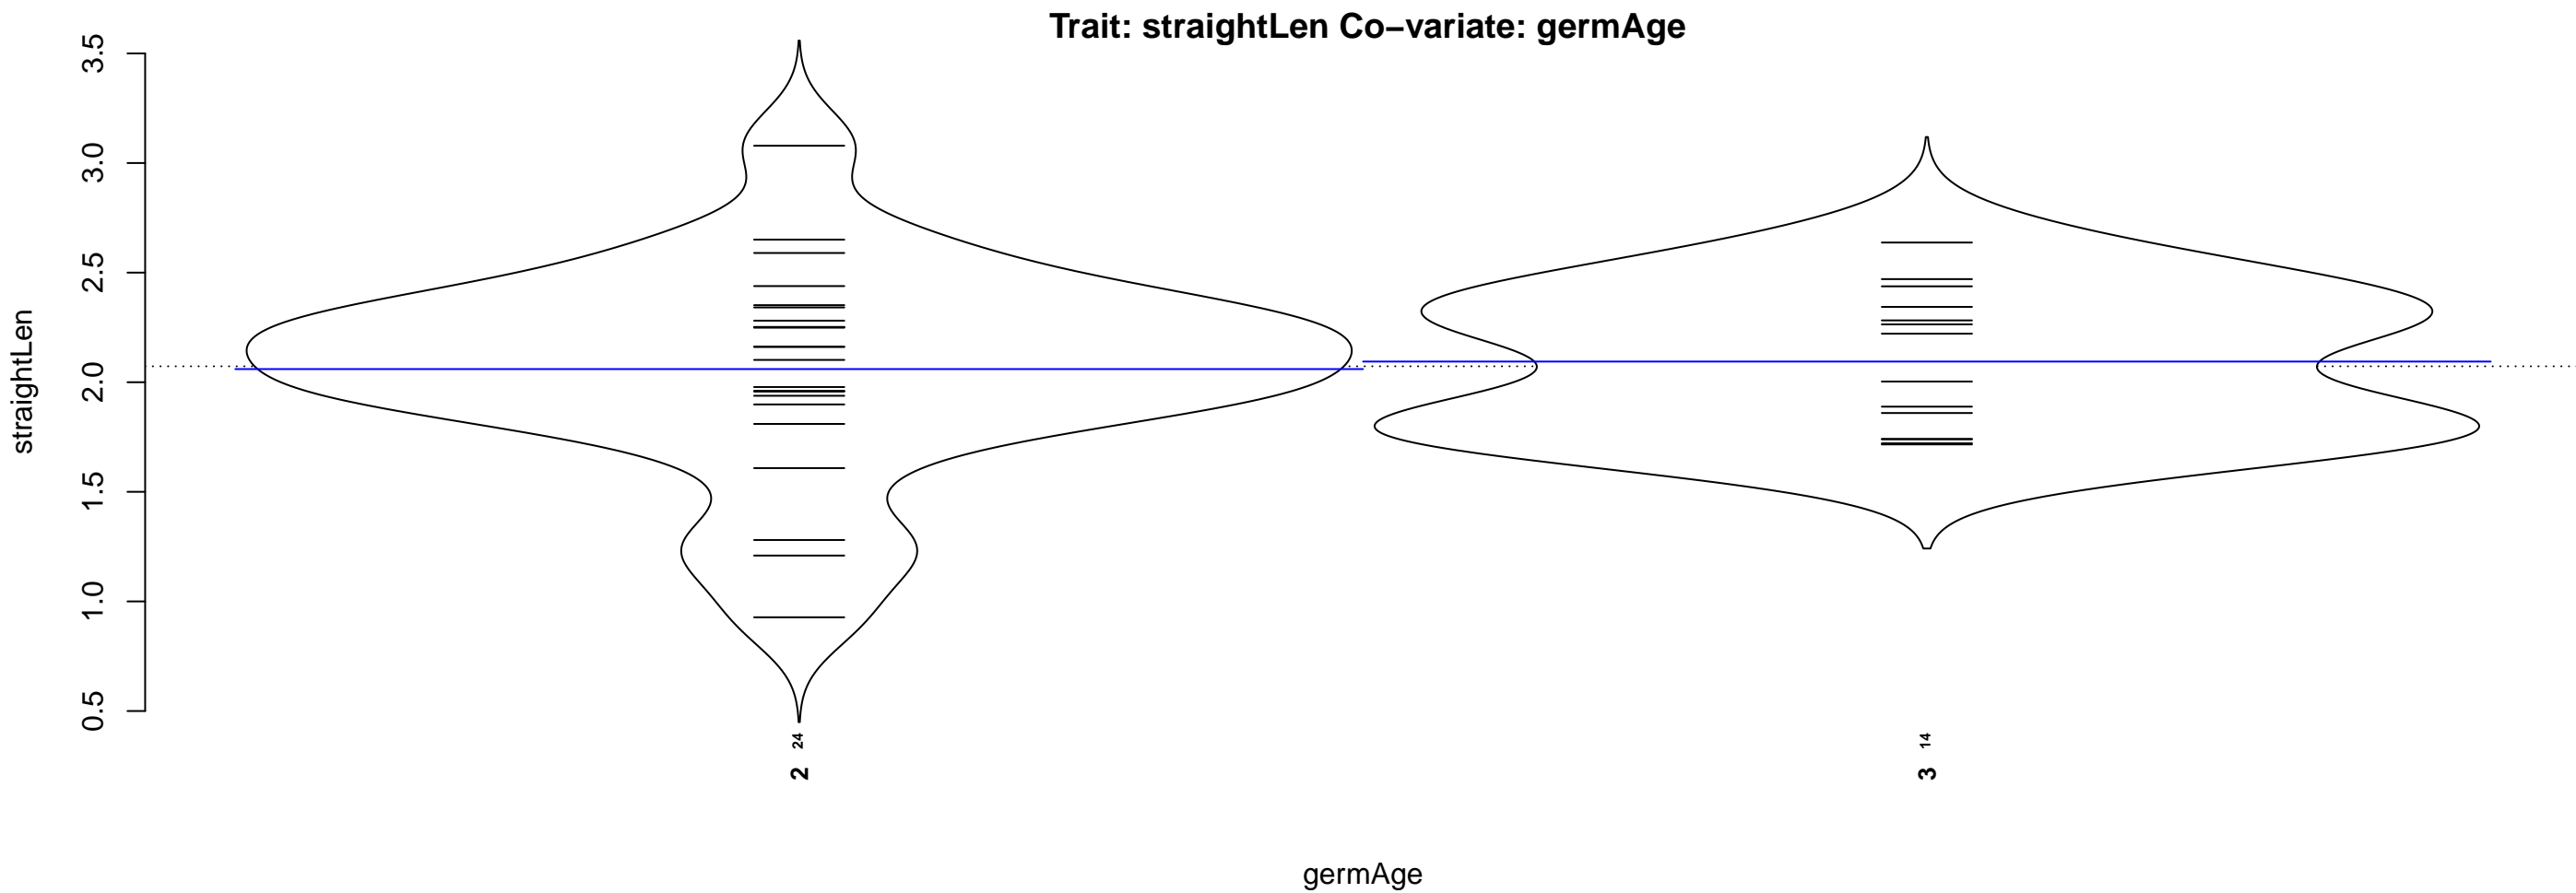

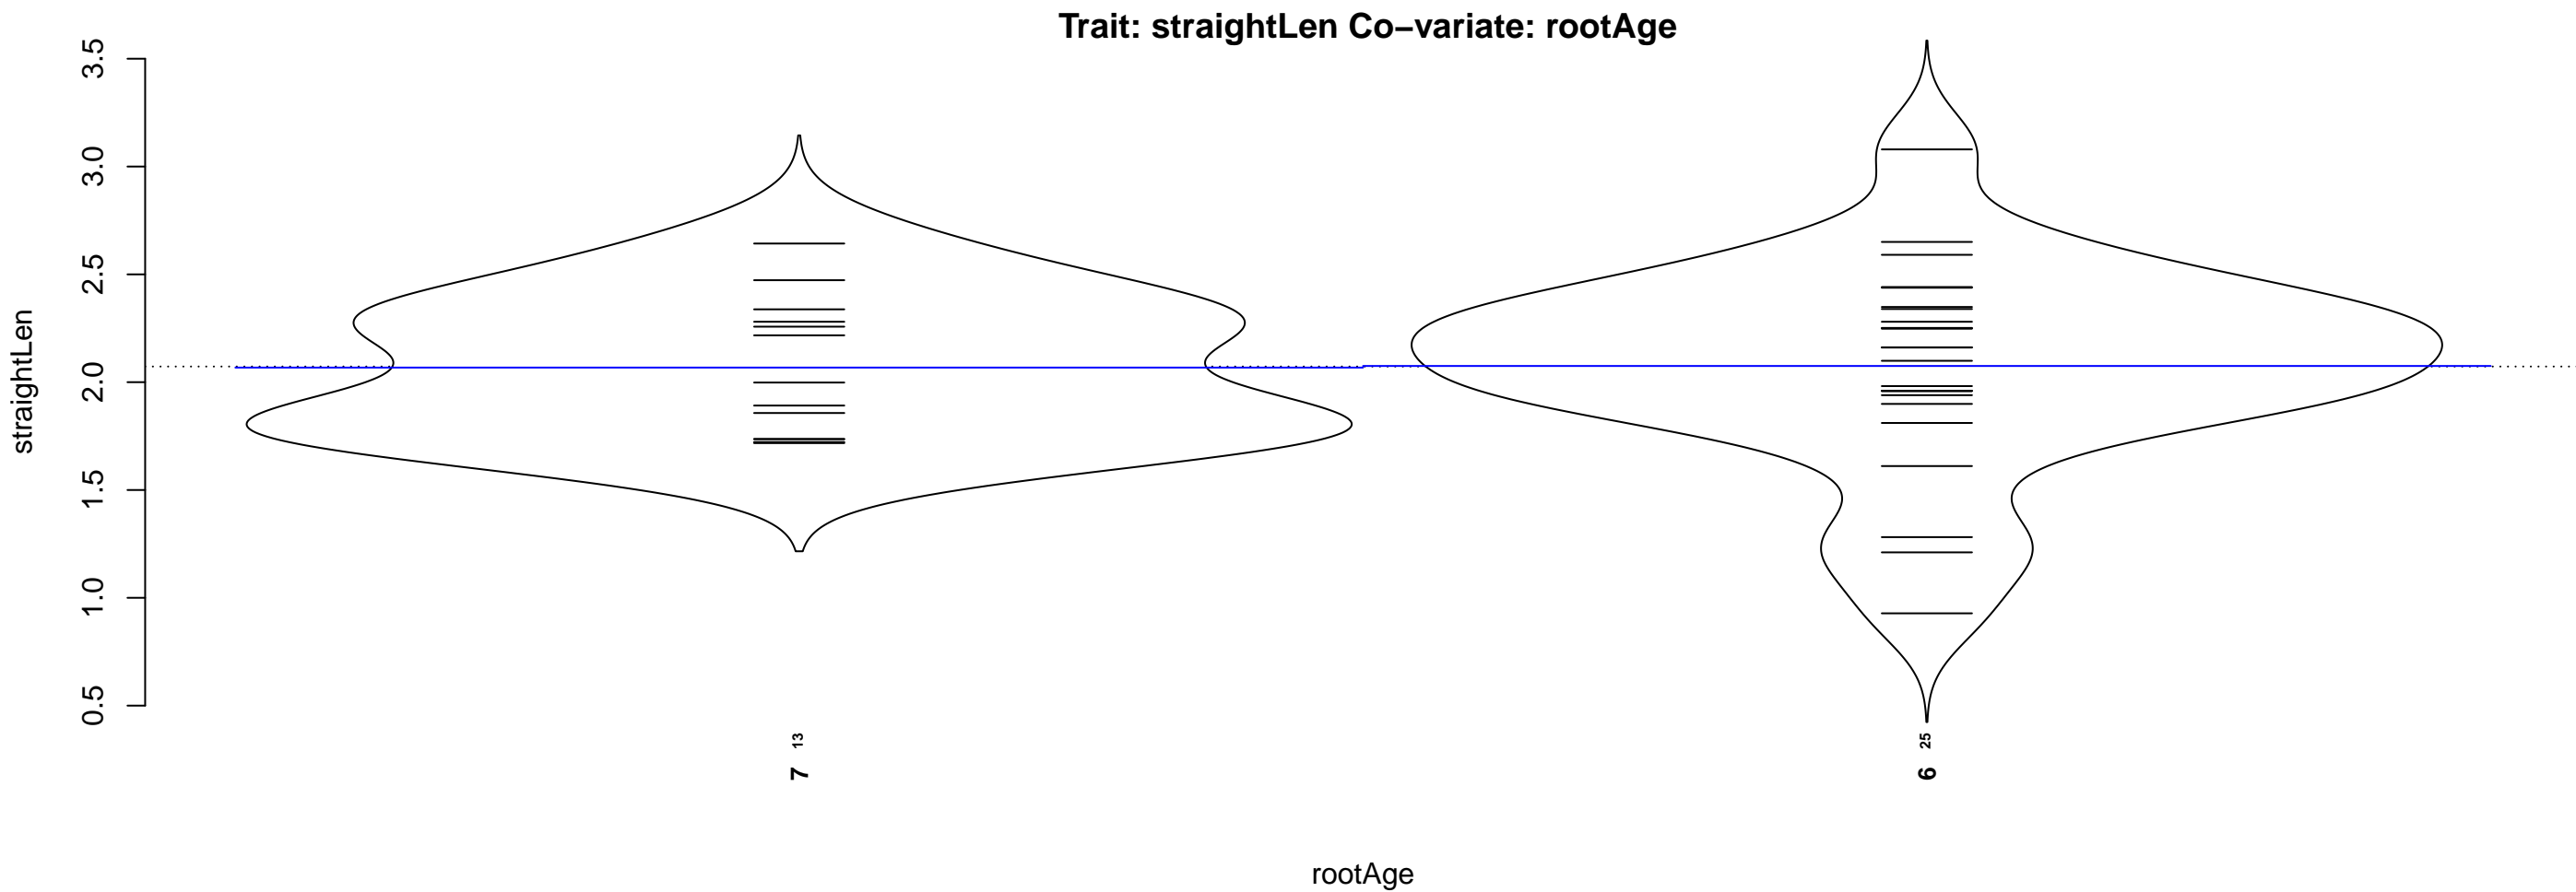

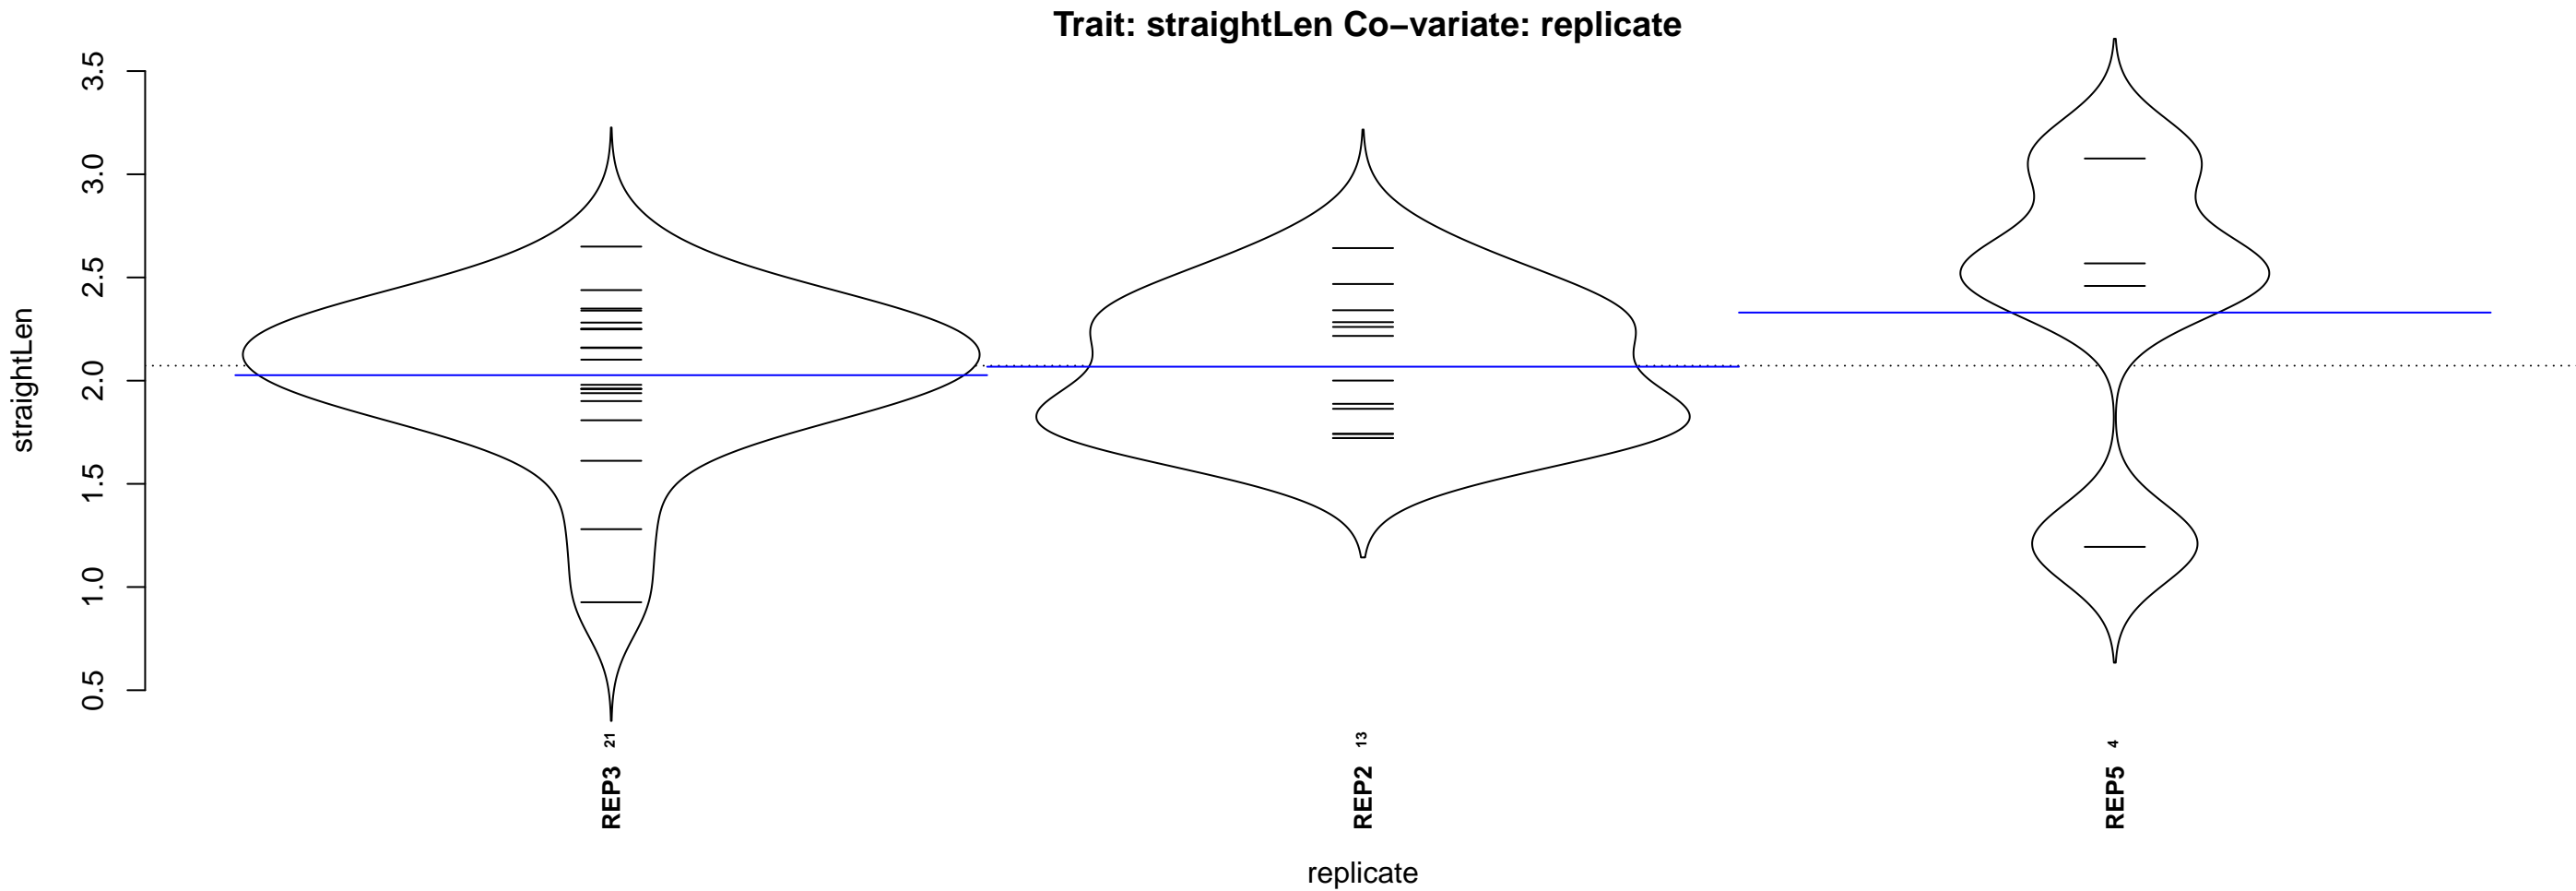

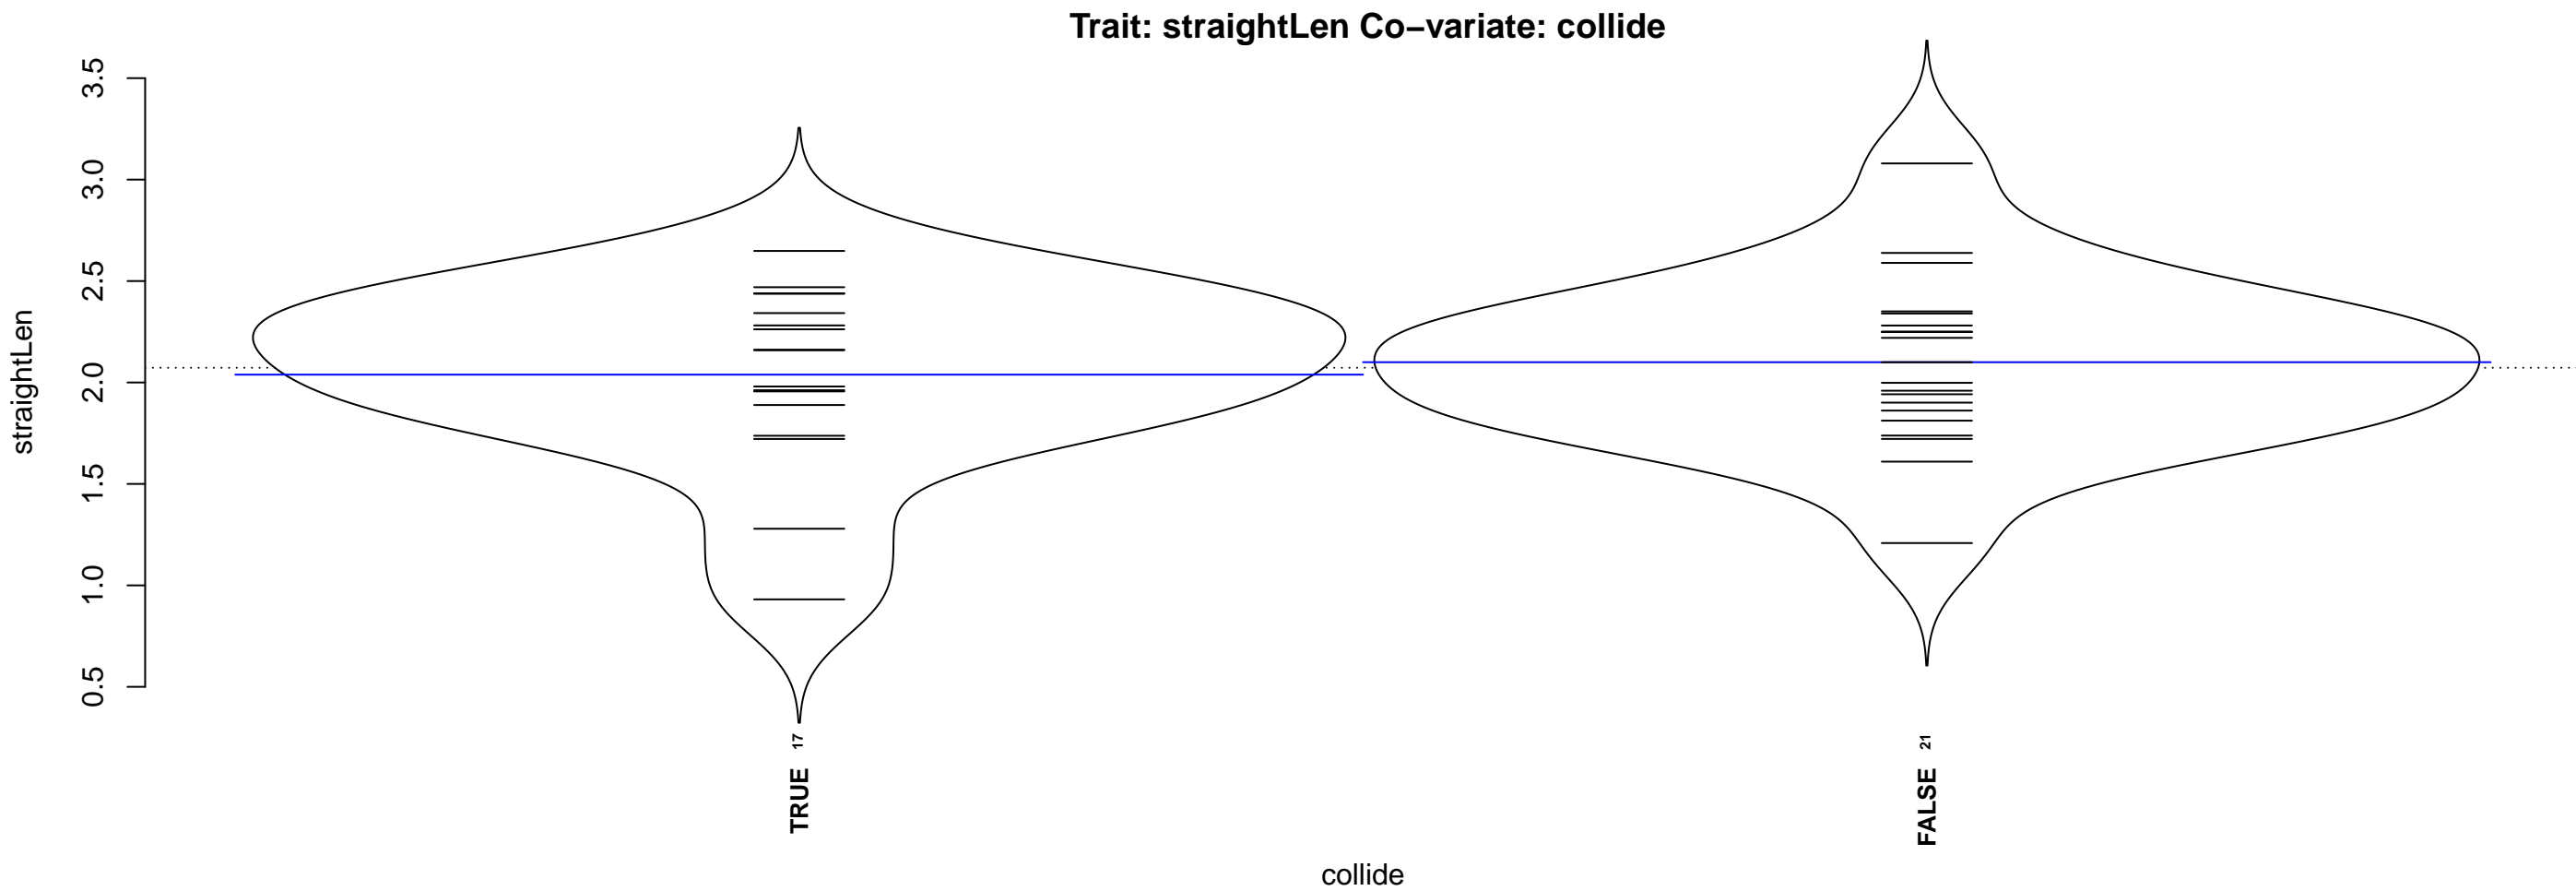

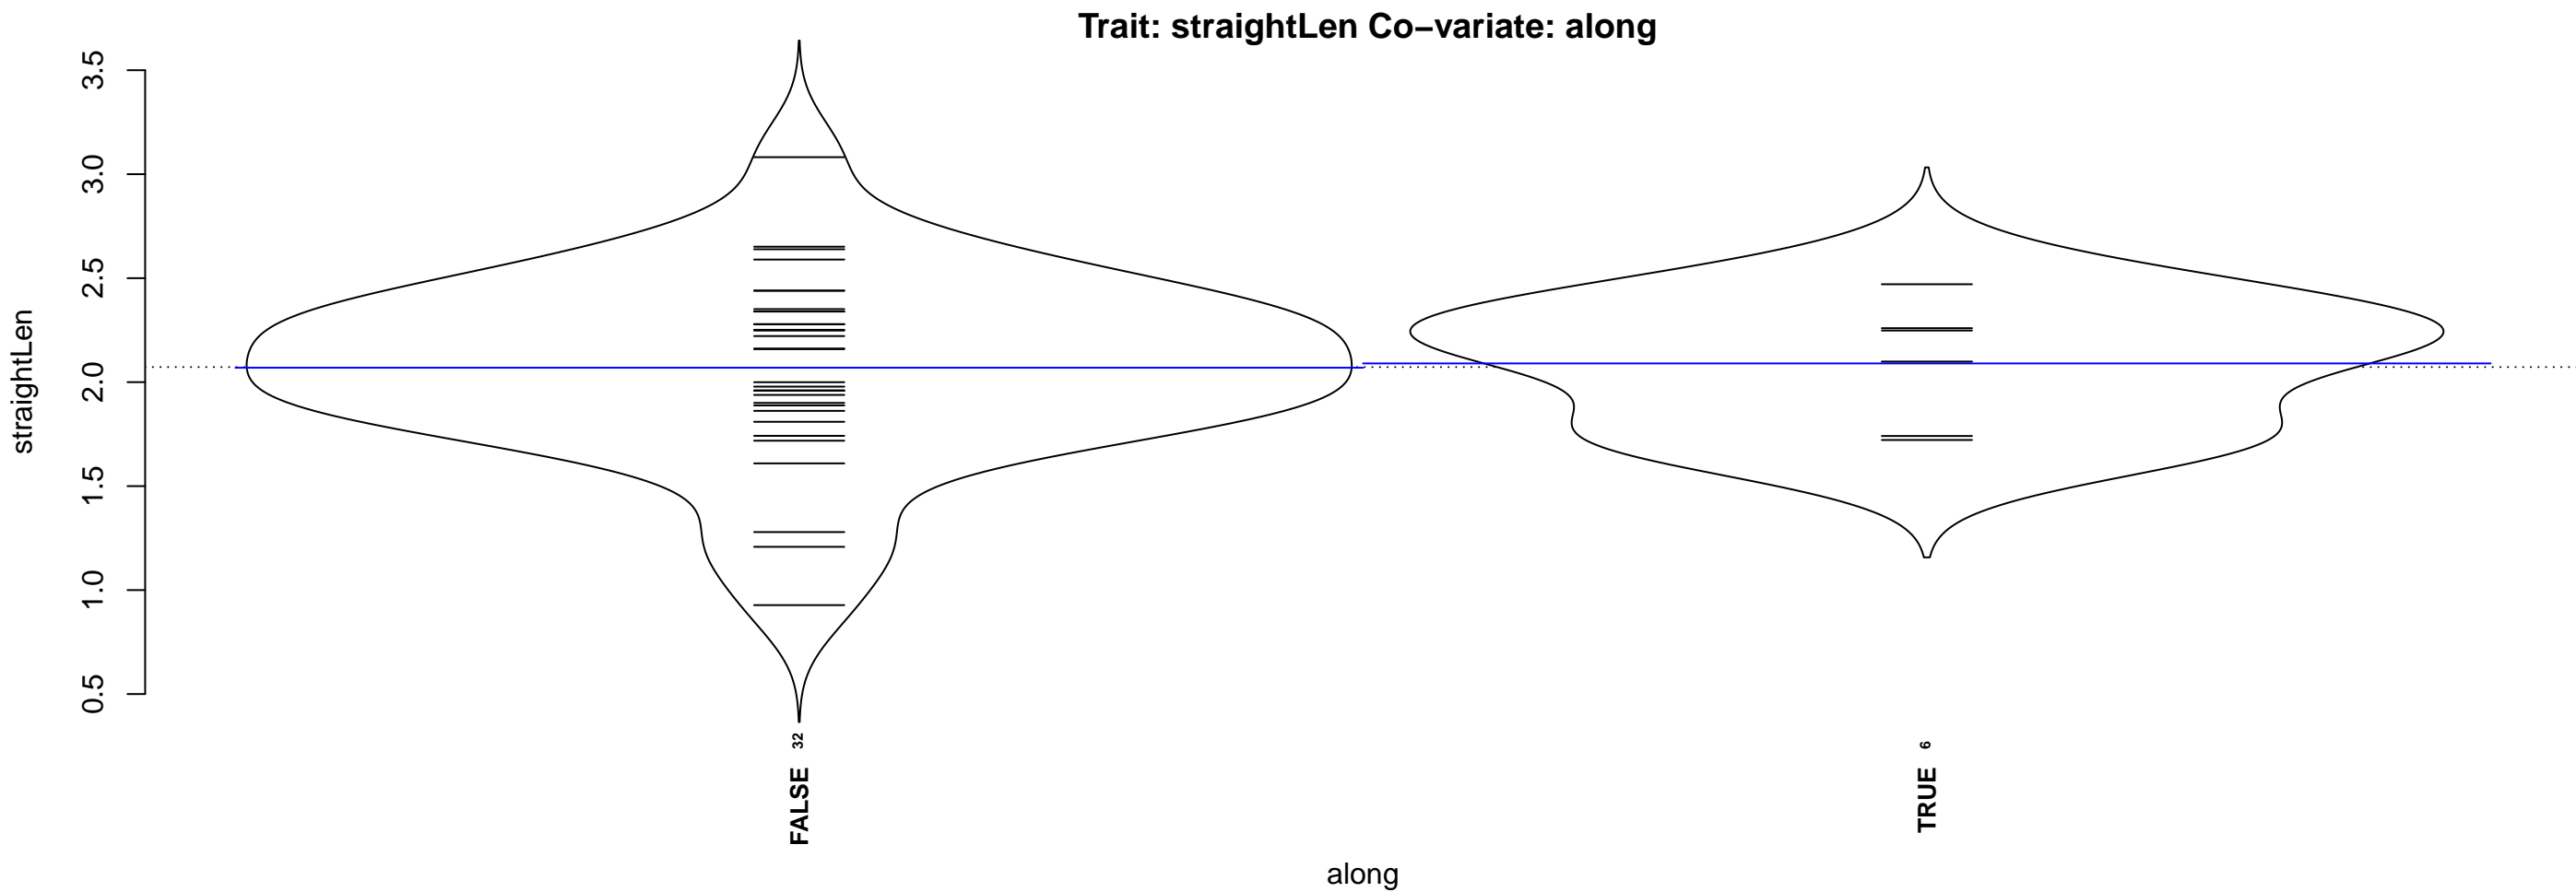

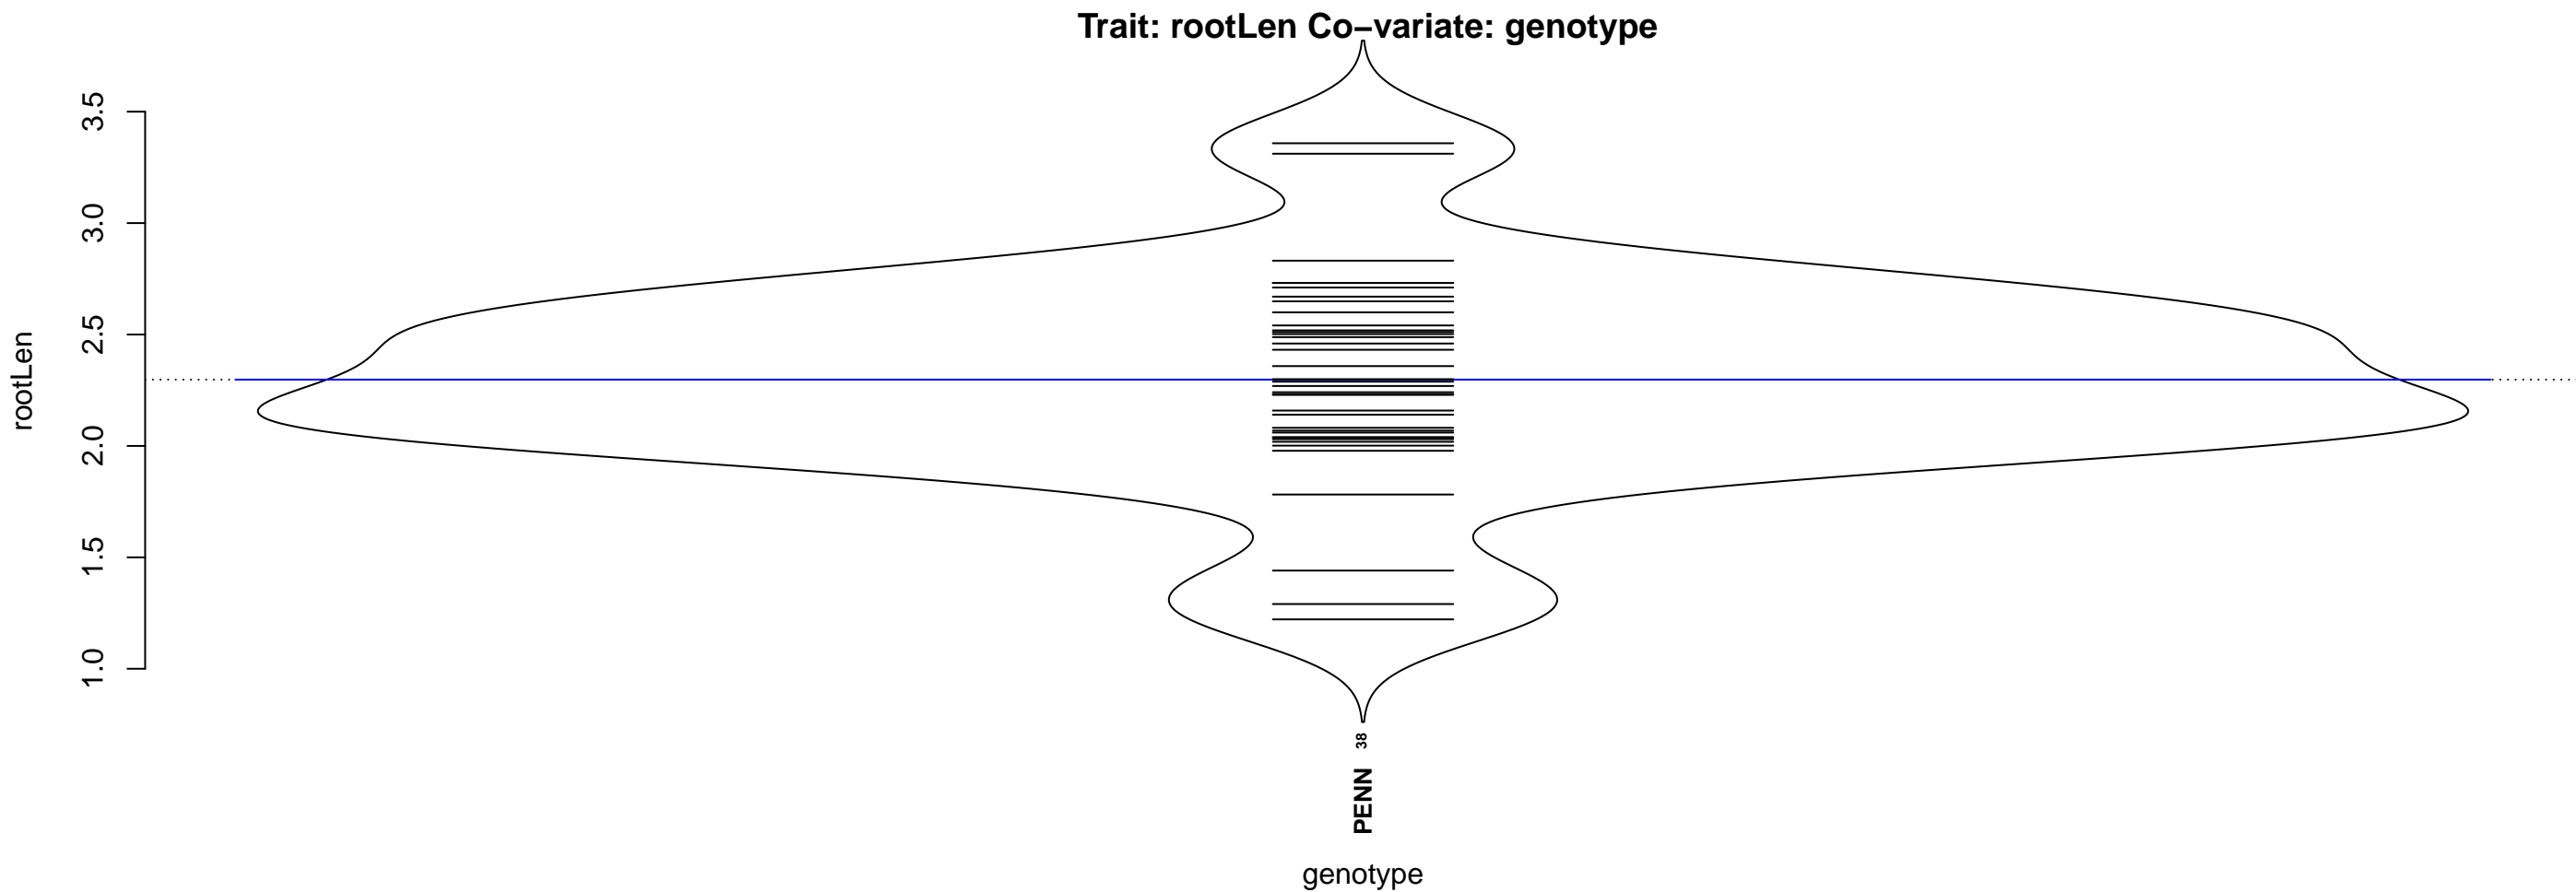



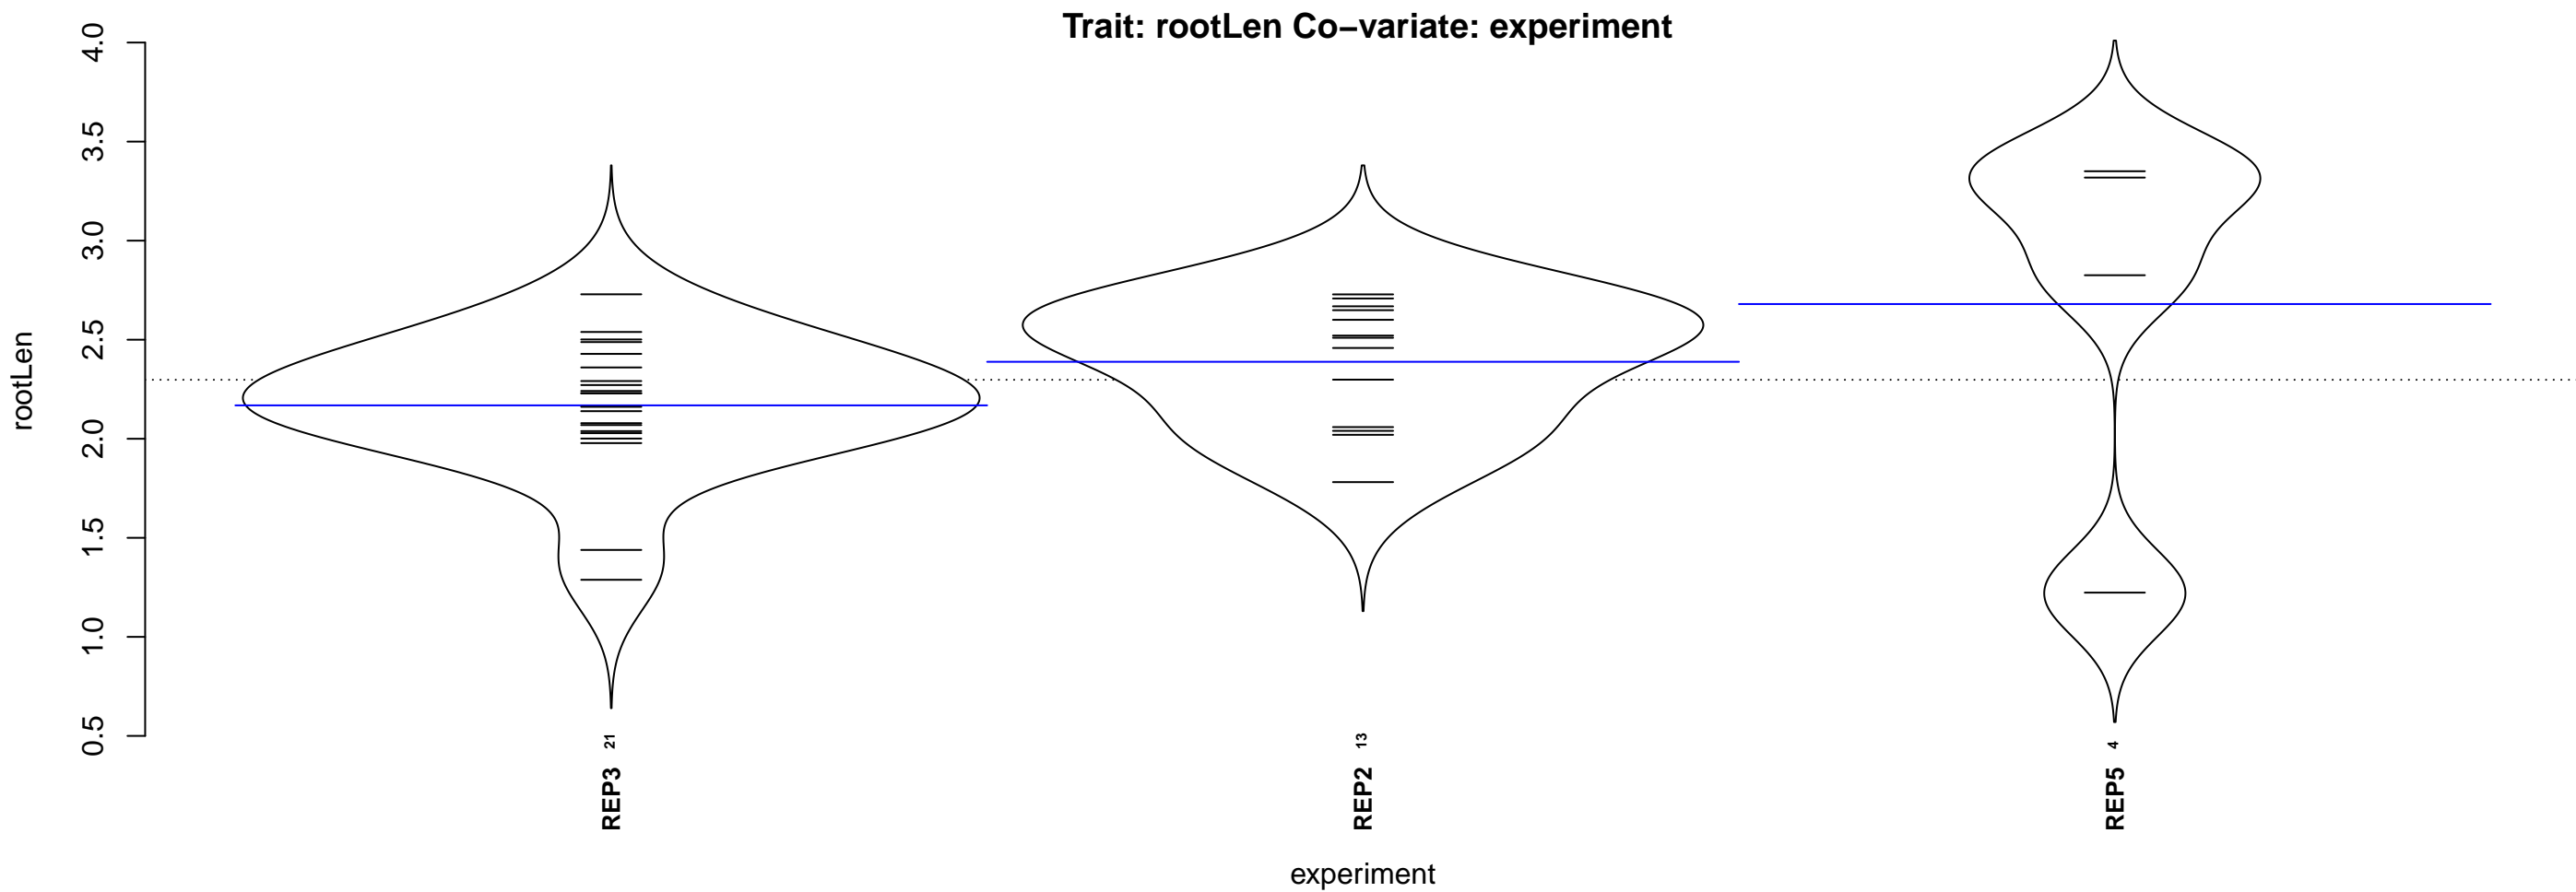

Trait: rootLen Co-variate: germAge

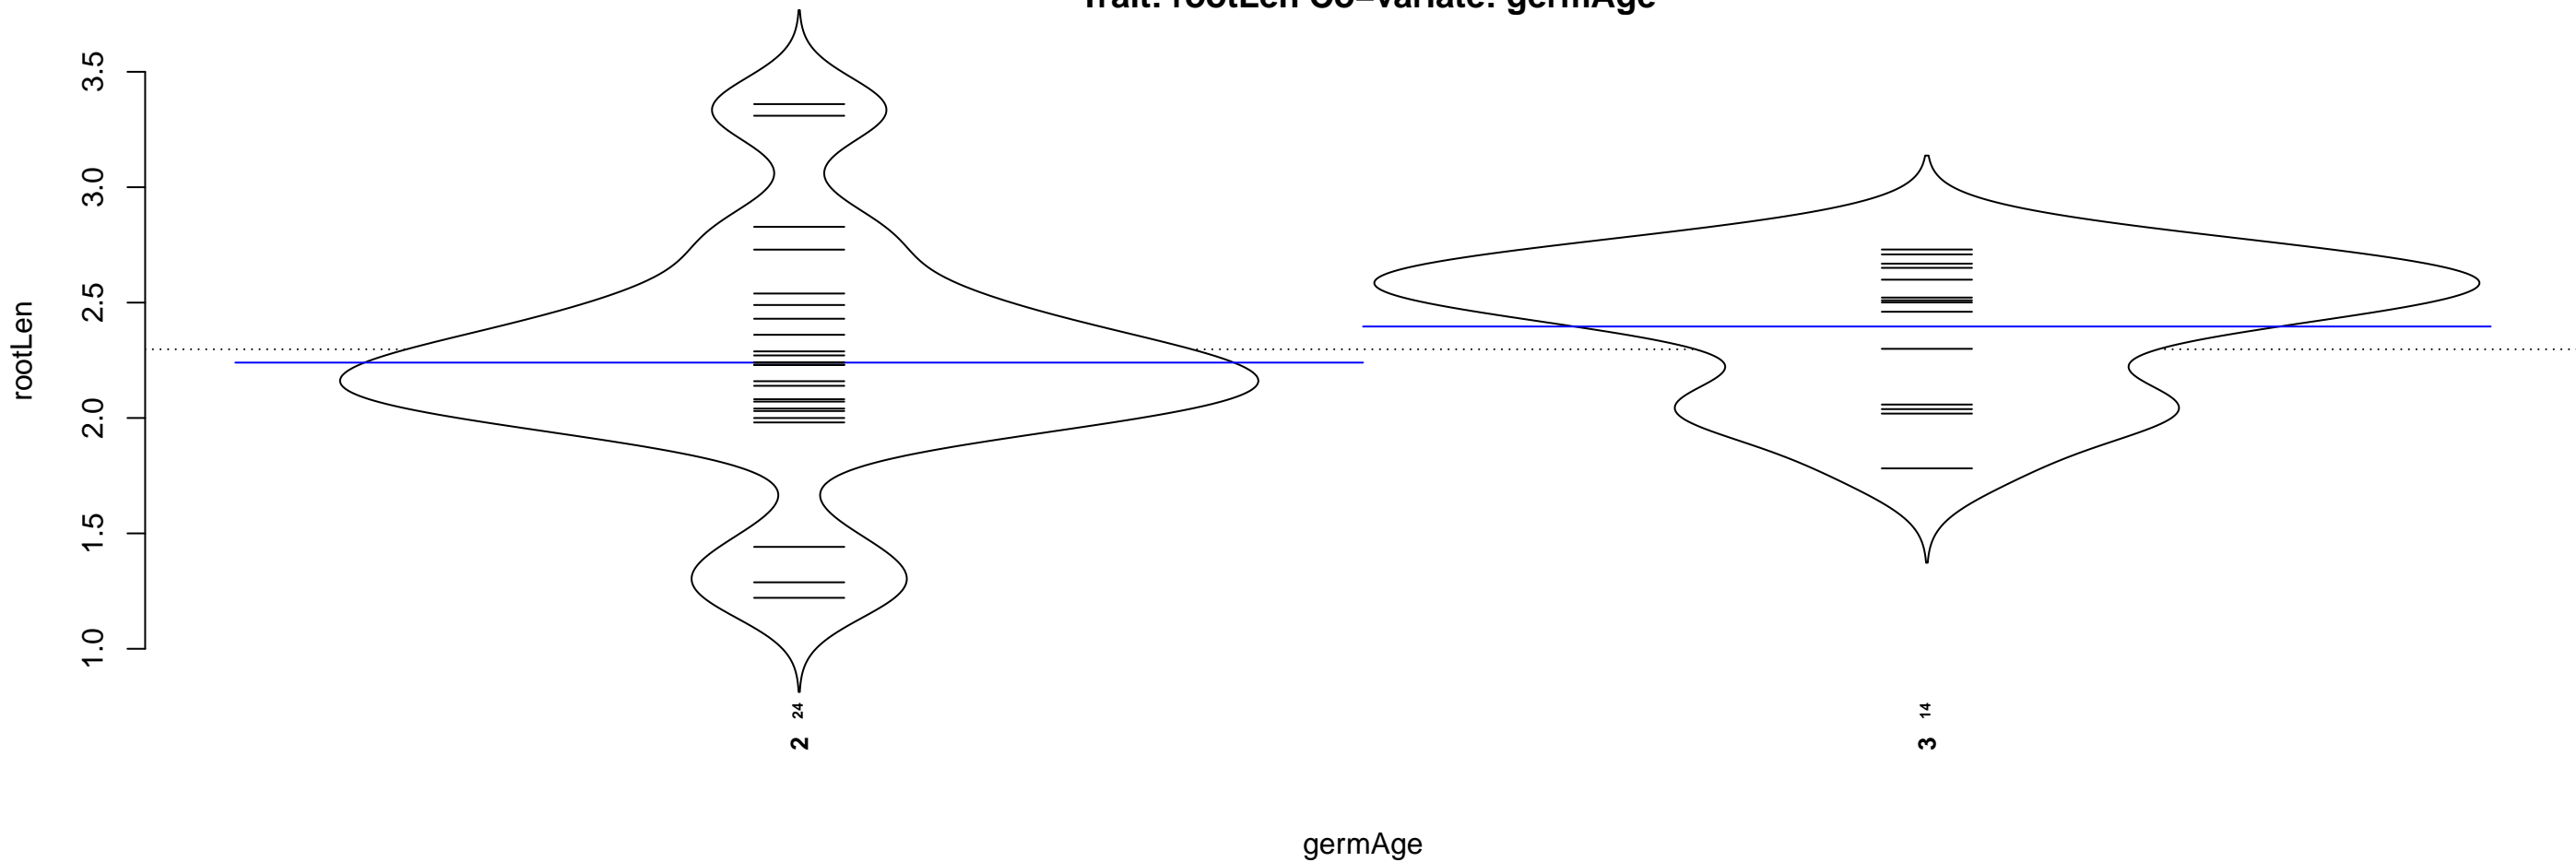

Trait: rootLen Co-variate: rootAge

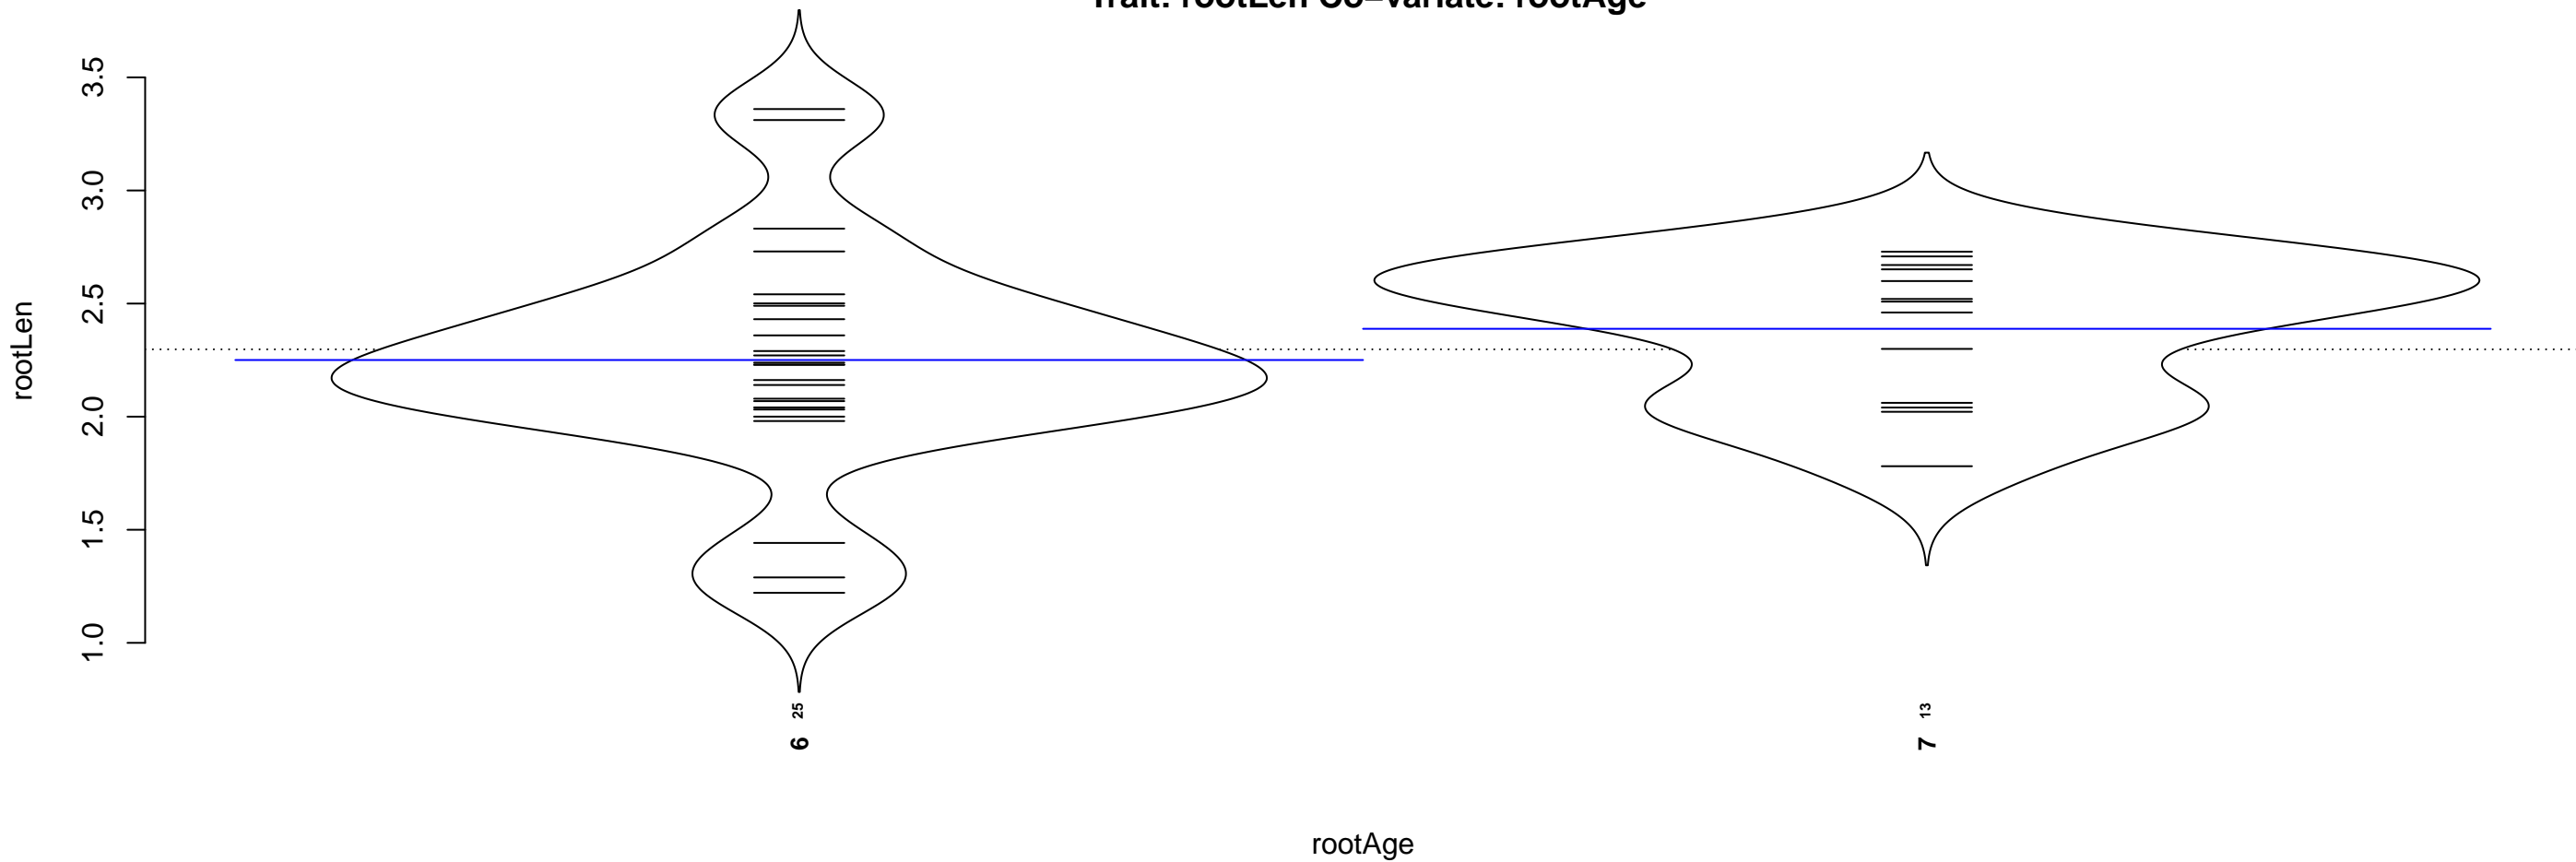

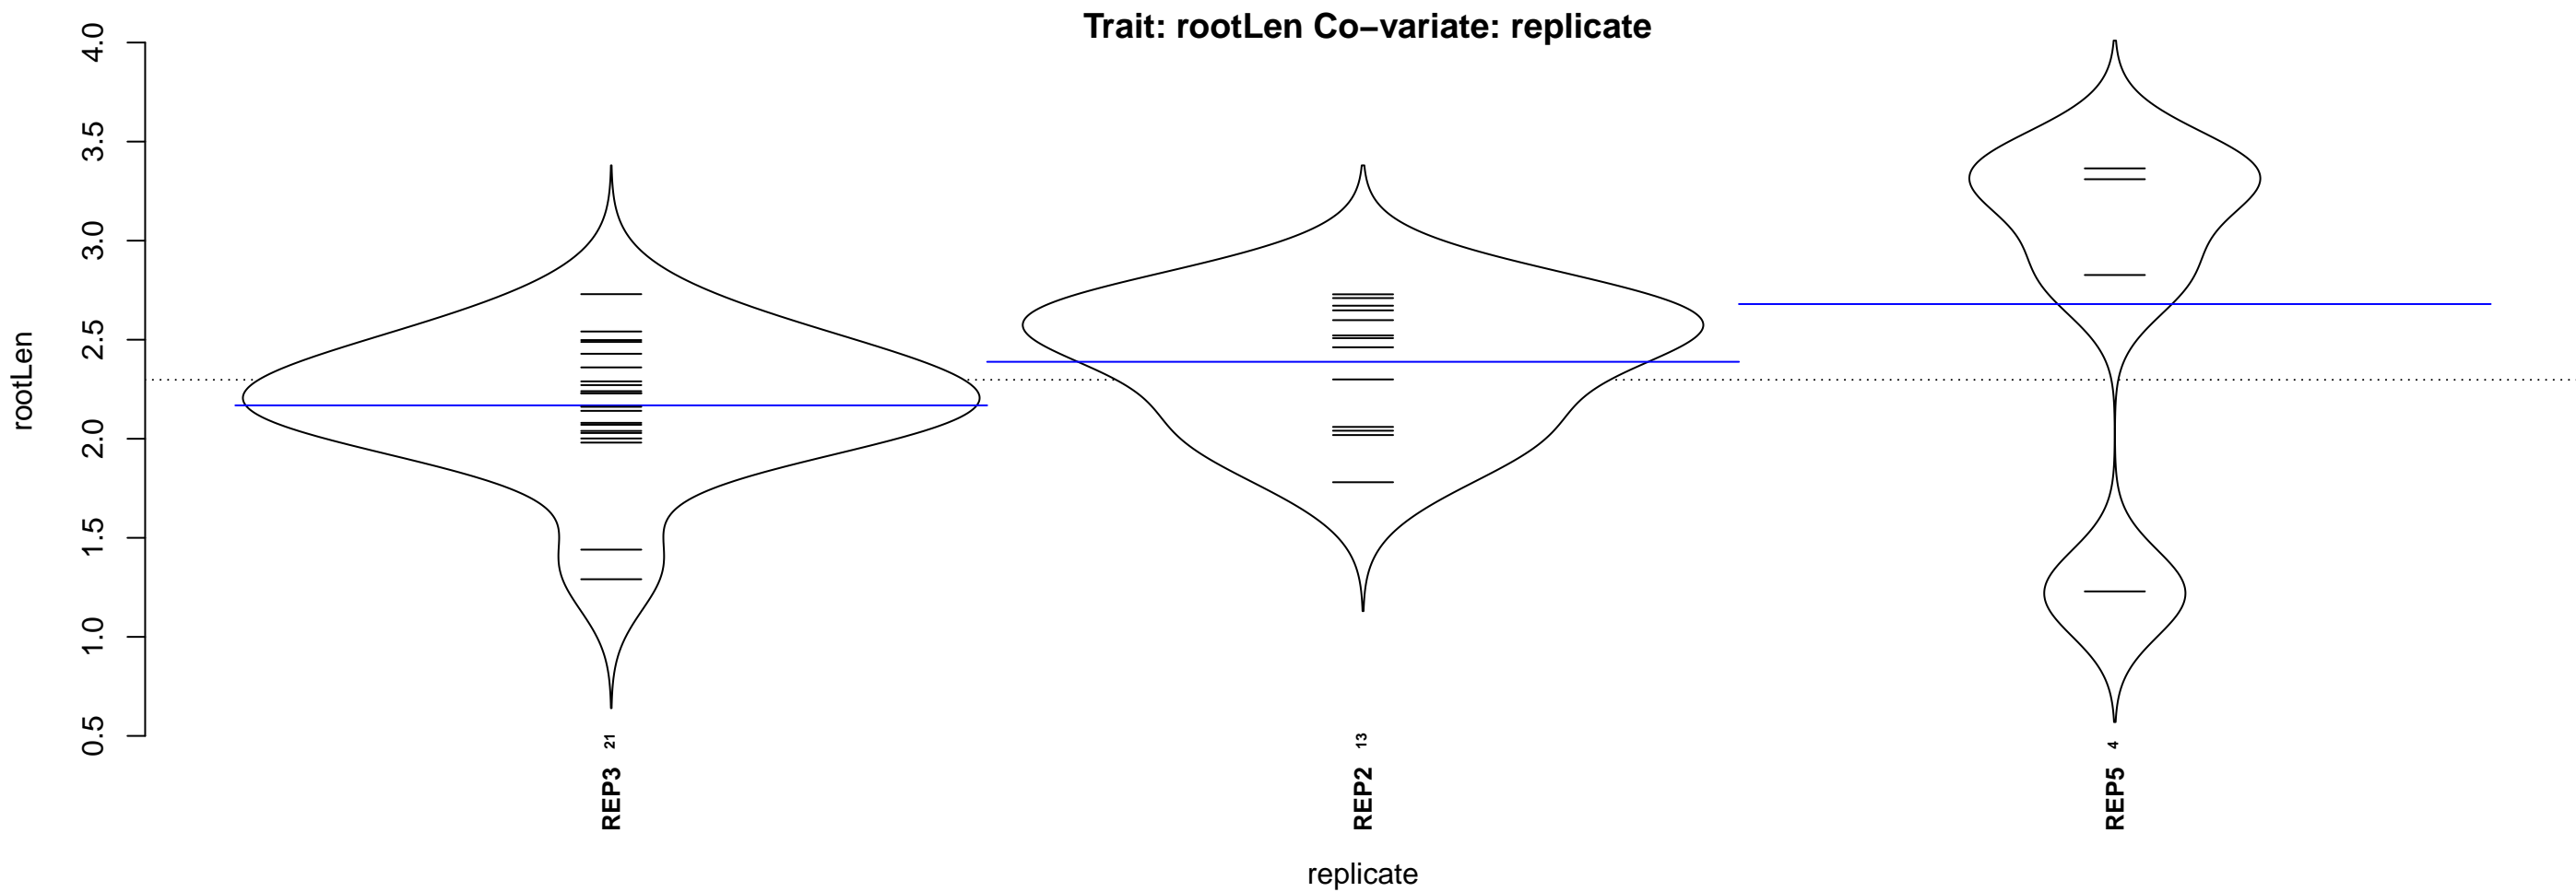

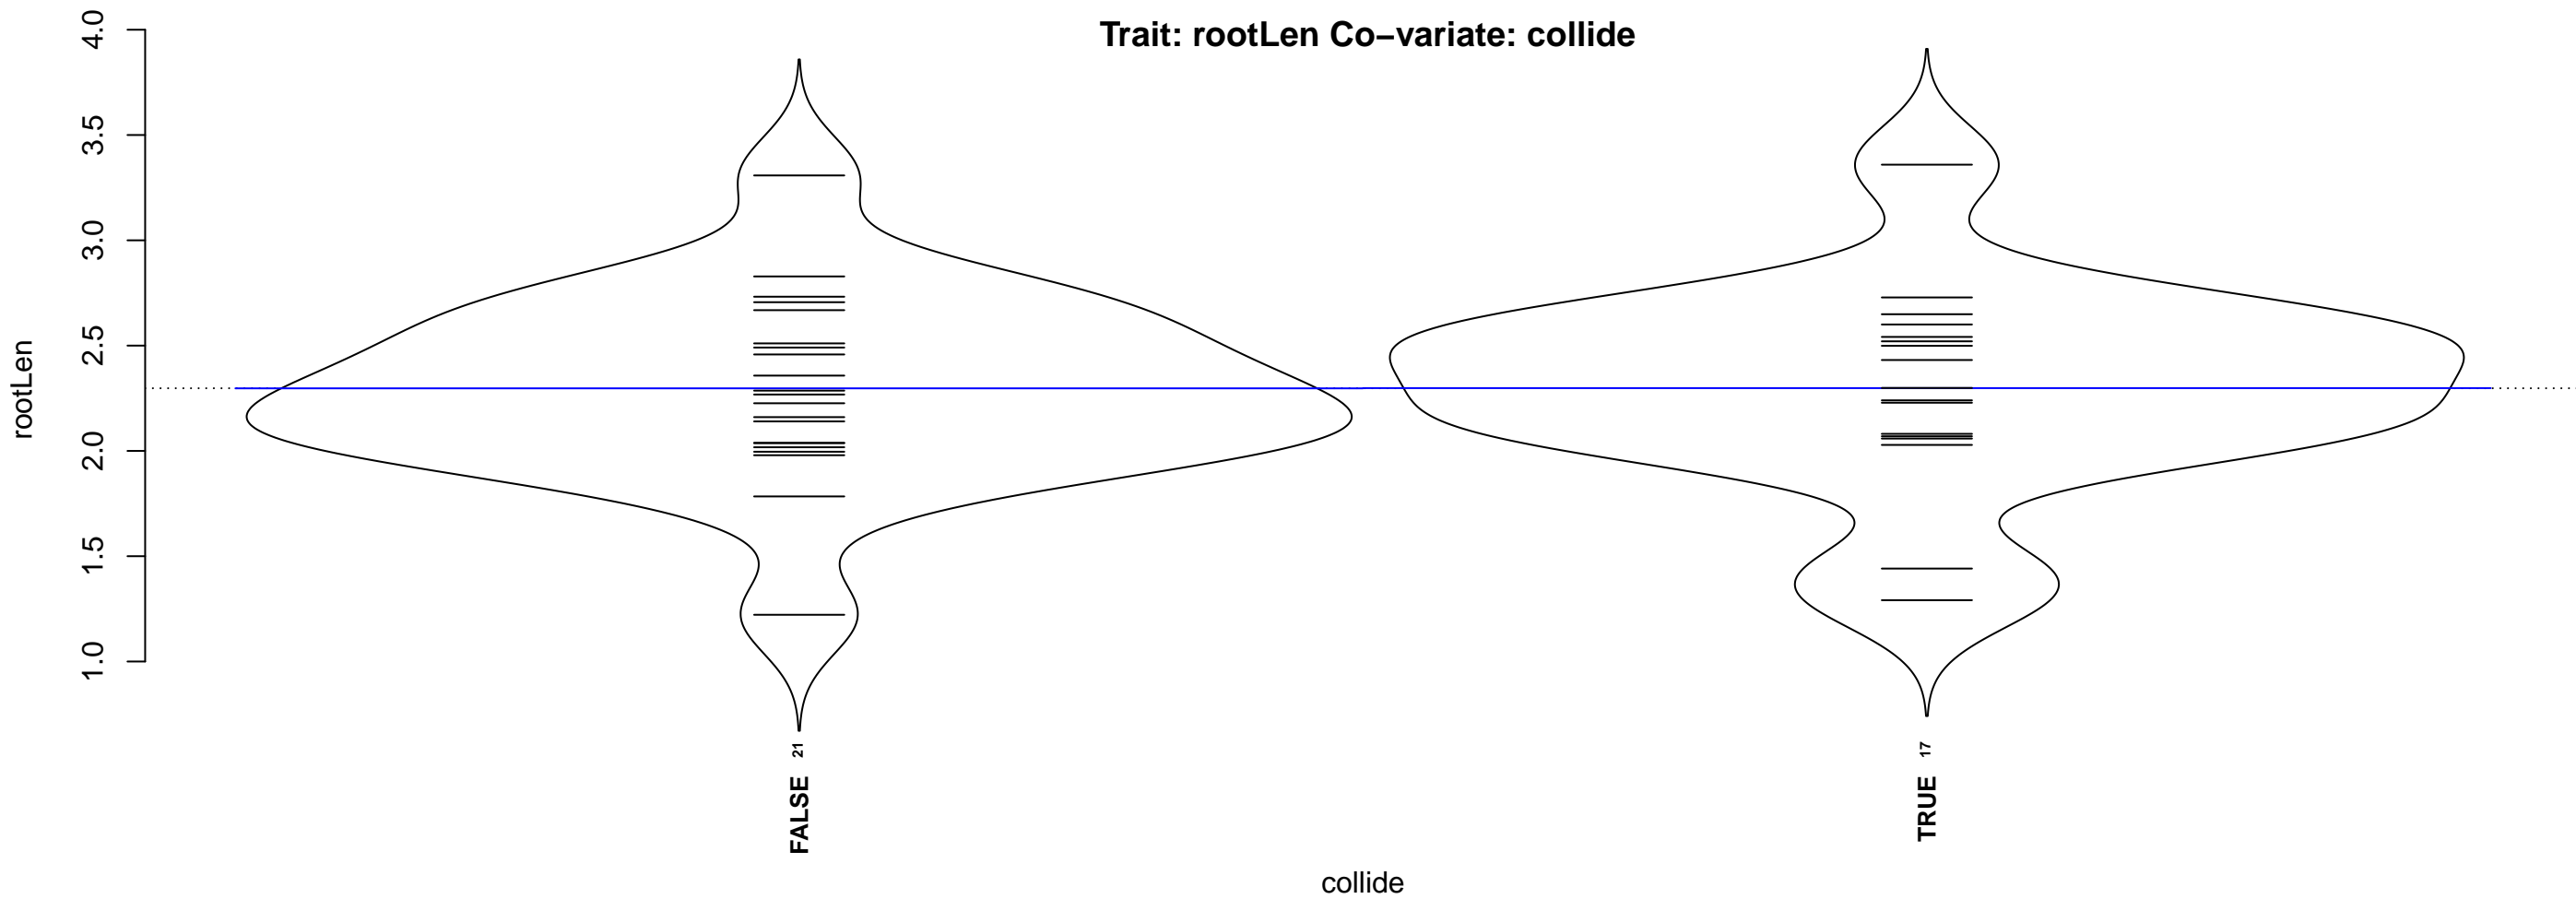

Trait: rootLen Co-variate: along

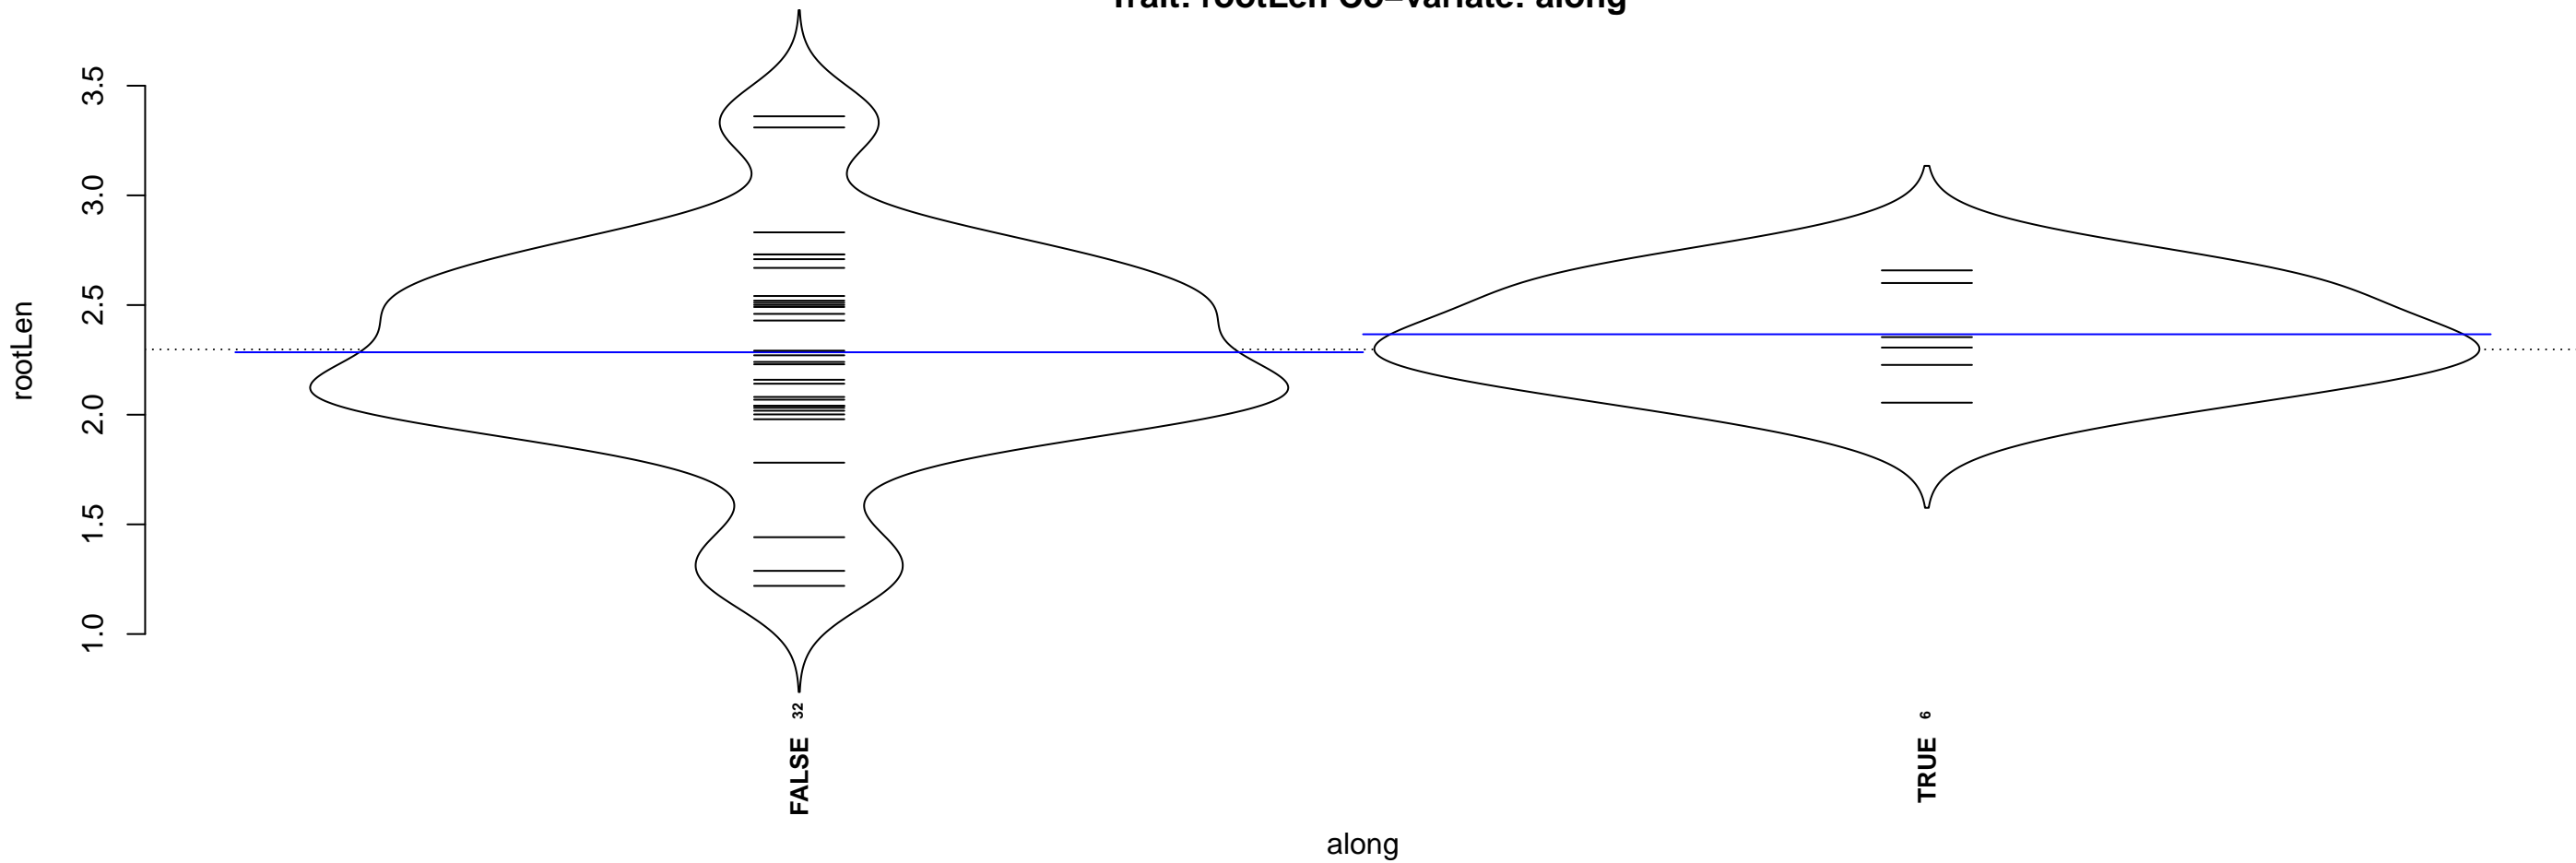

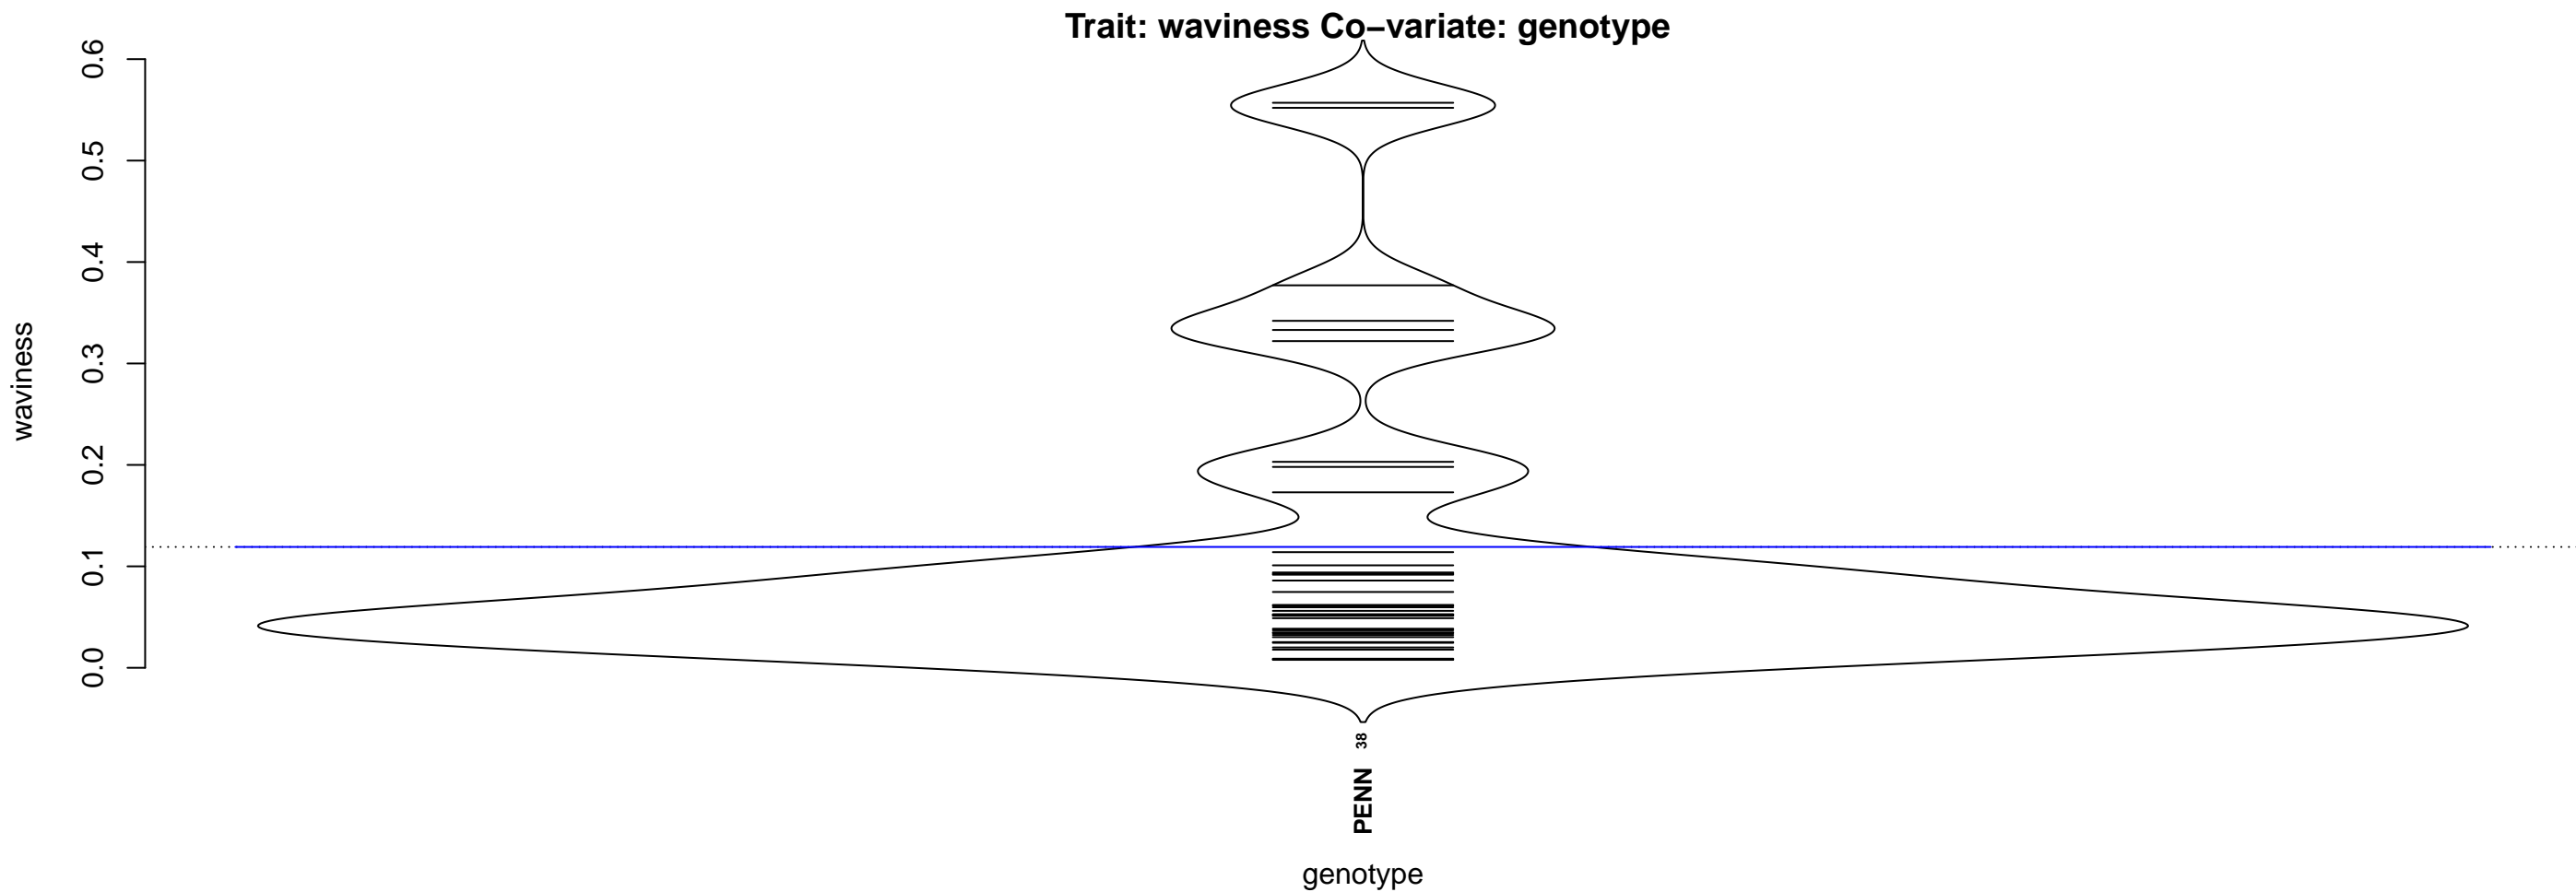

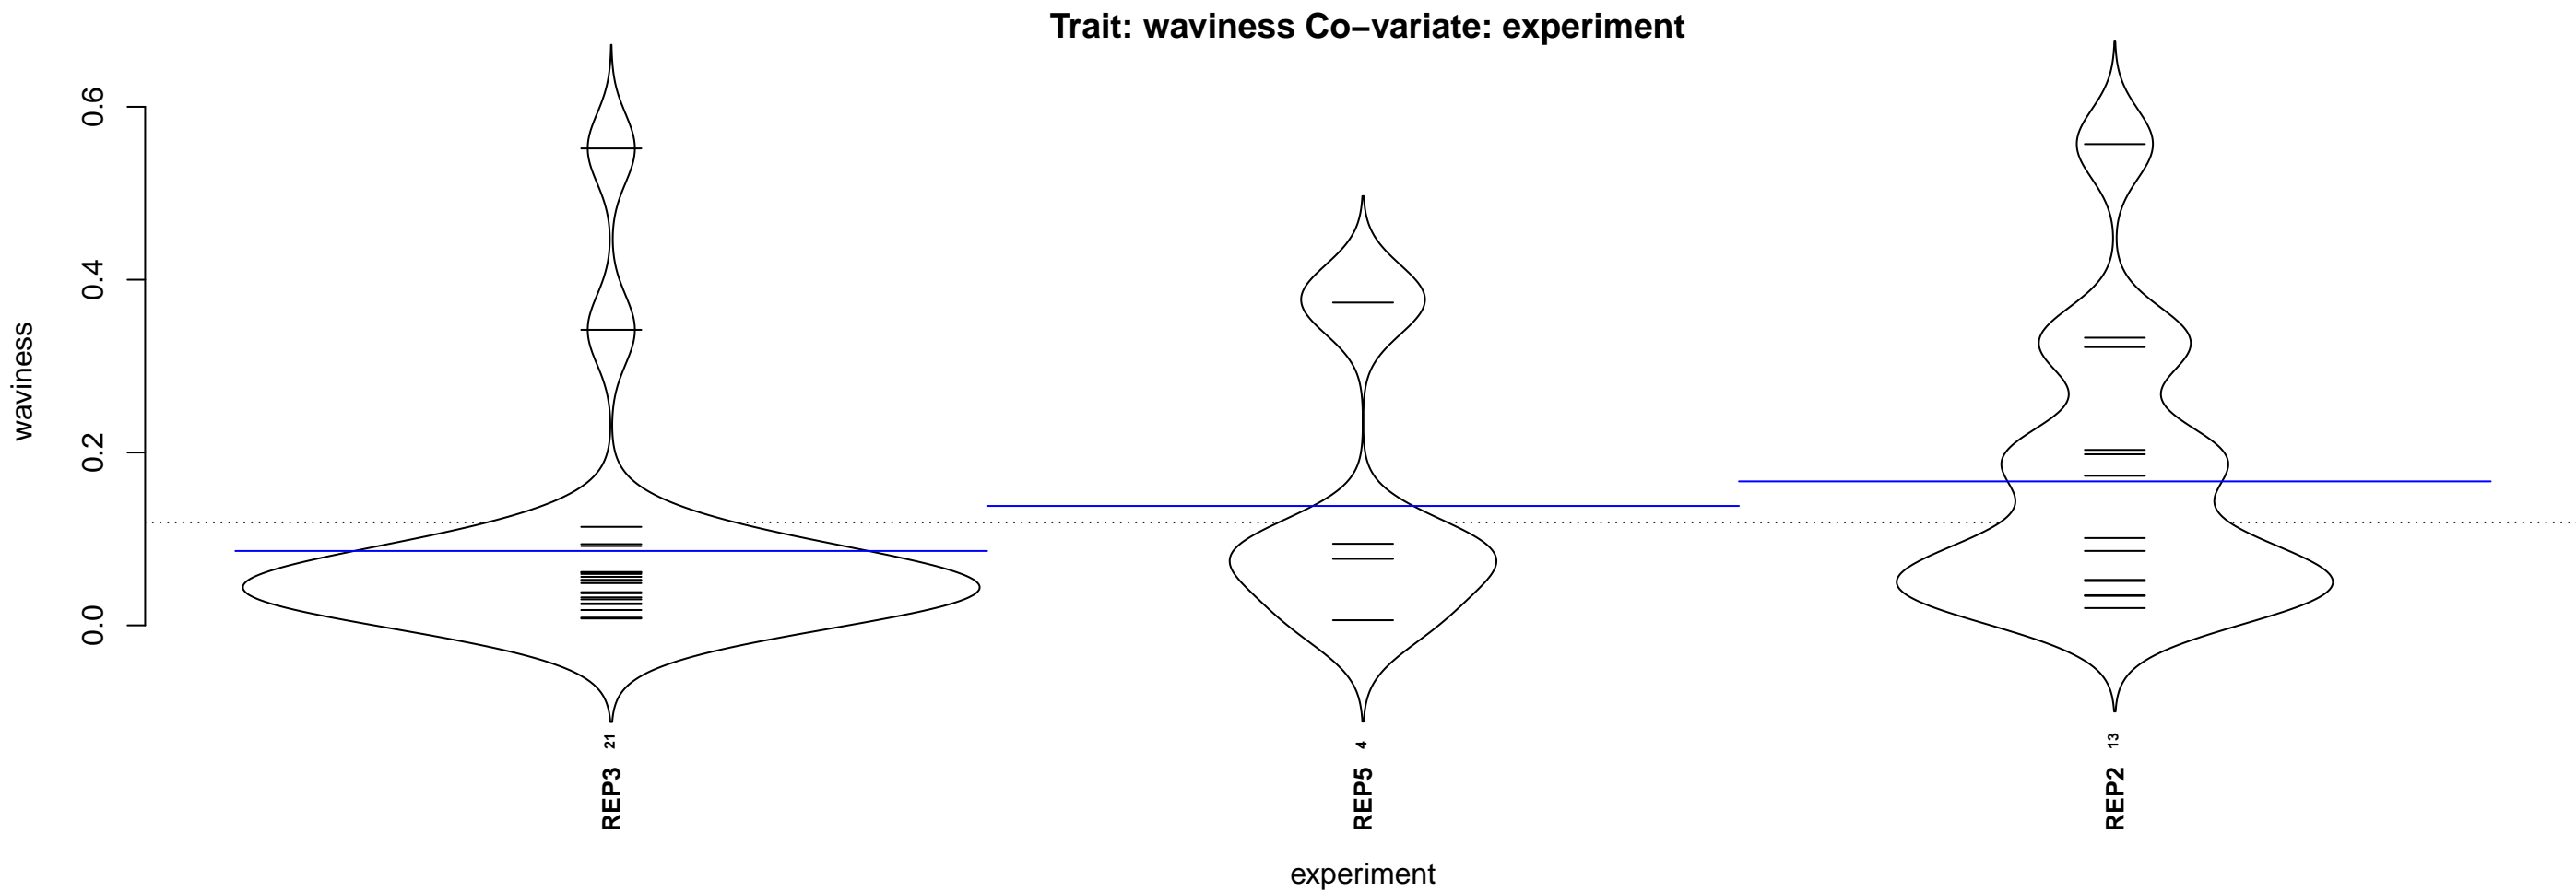



Trait: waviness Co-variate: germAge

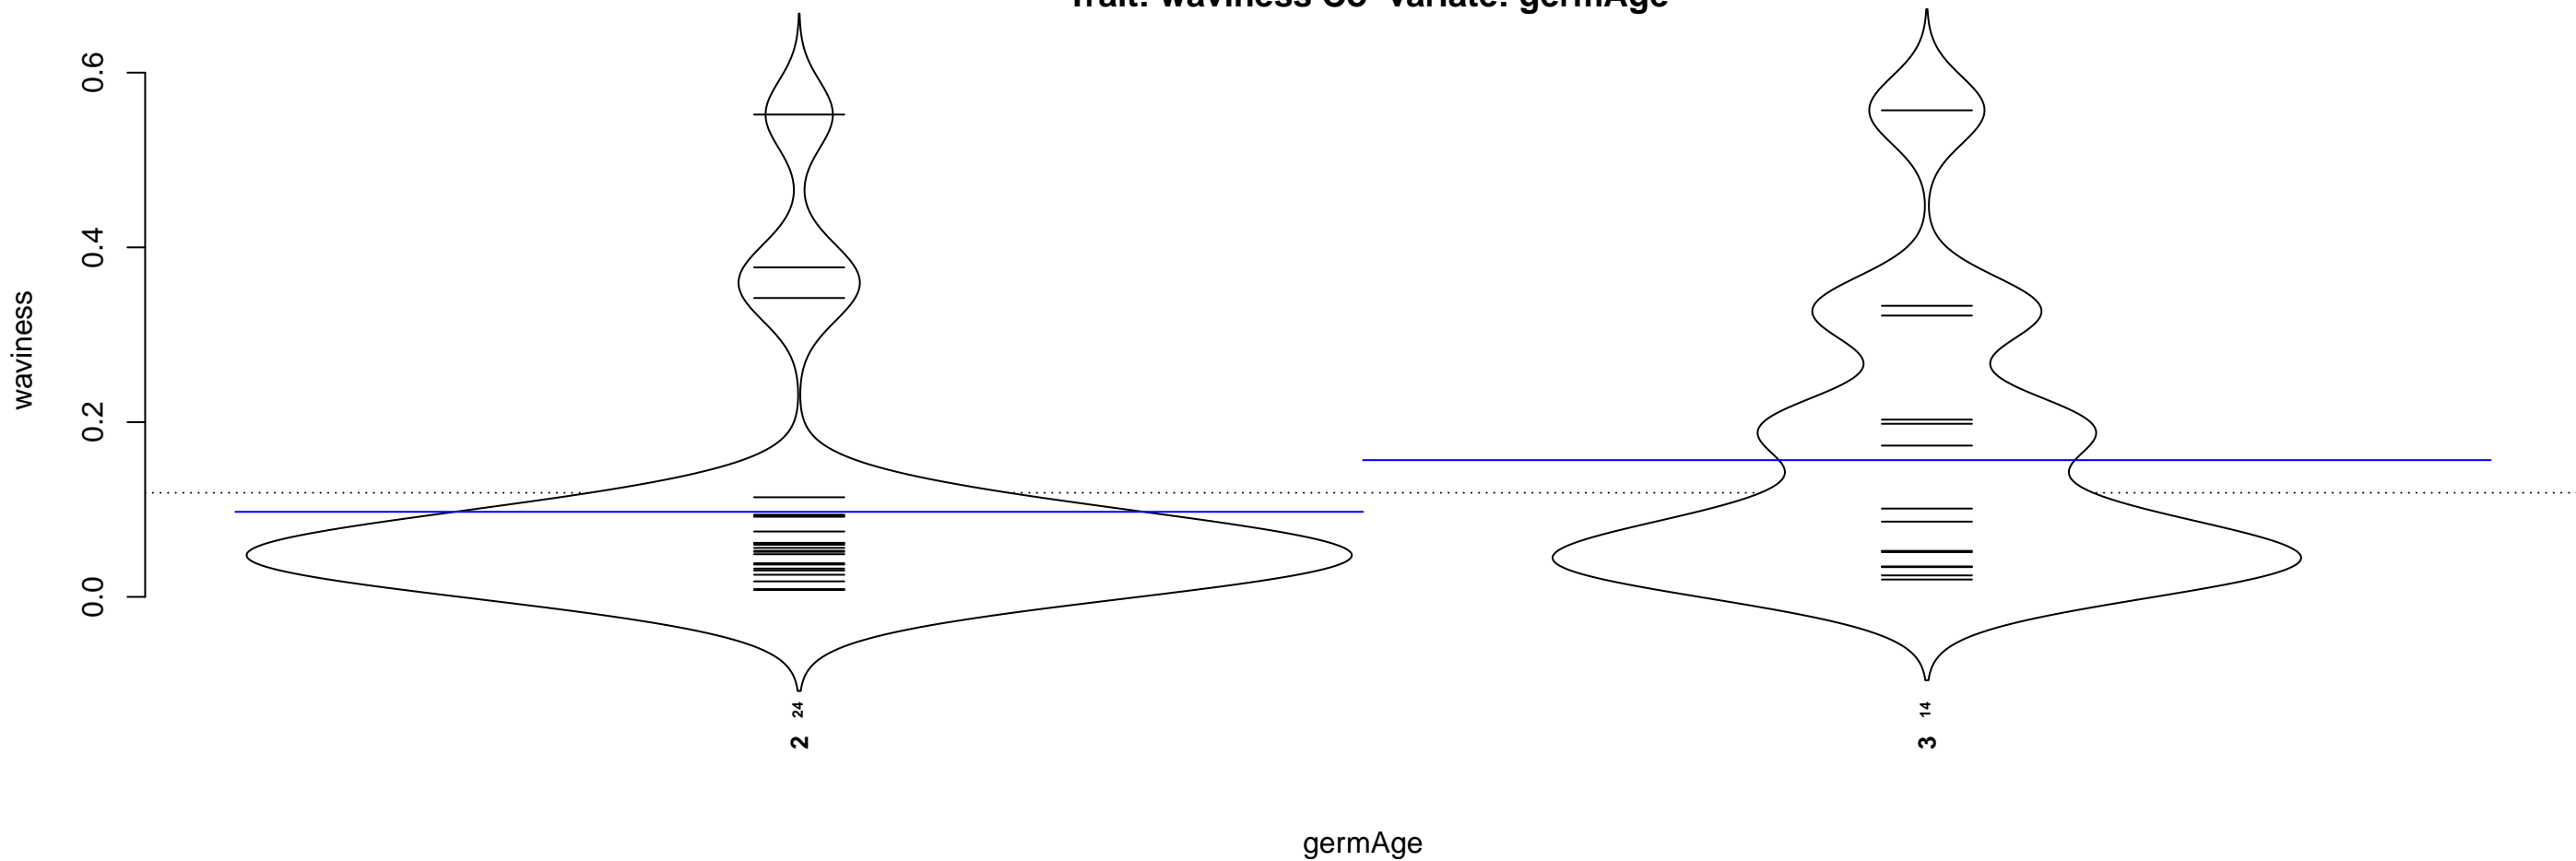

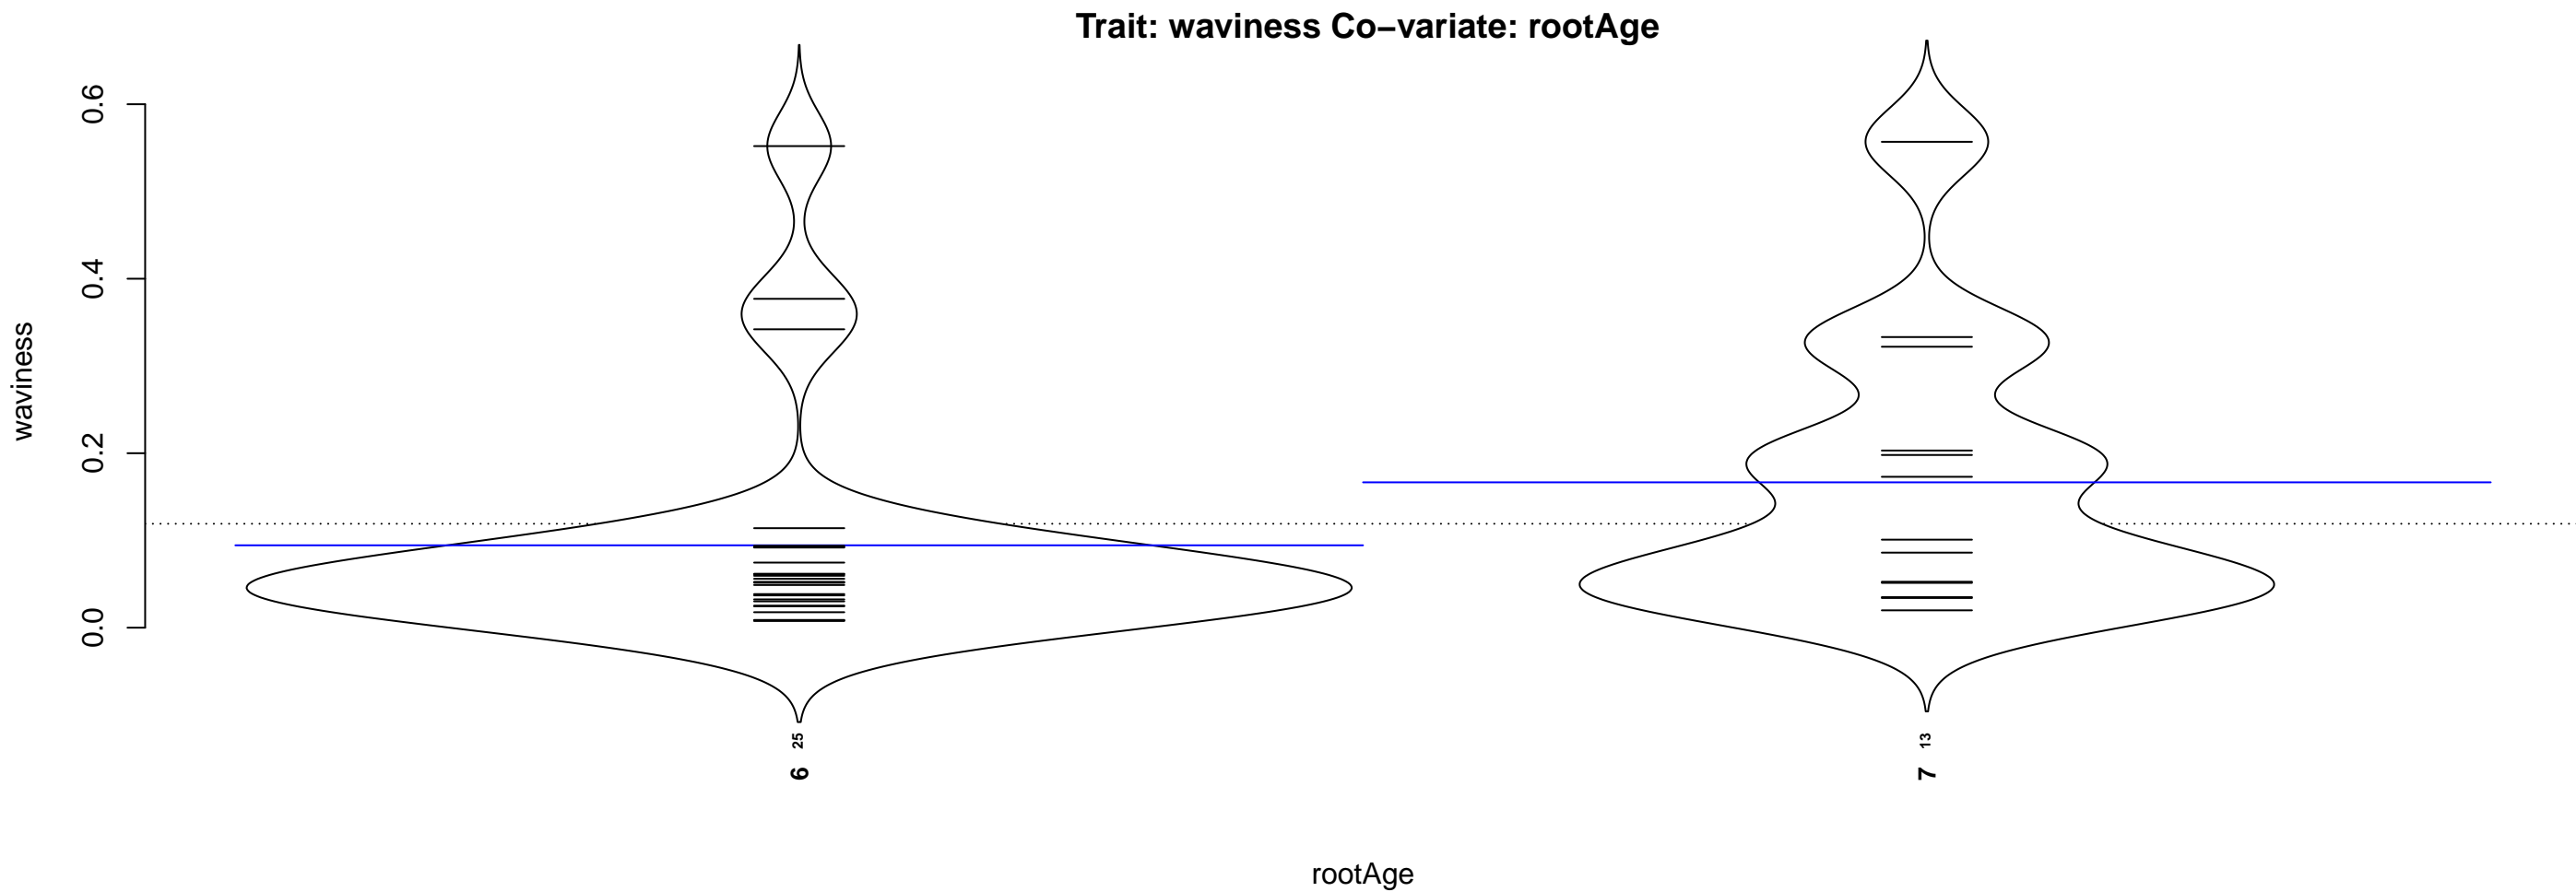

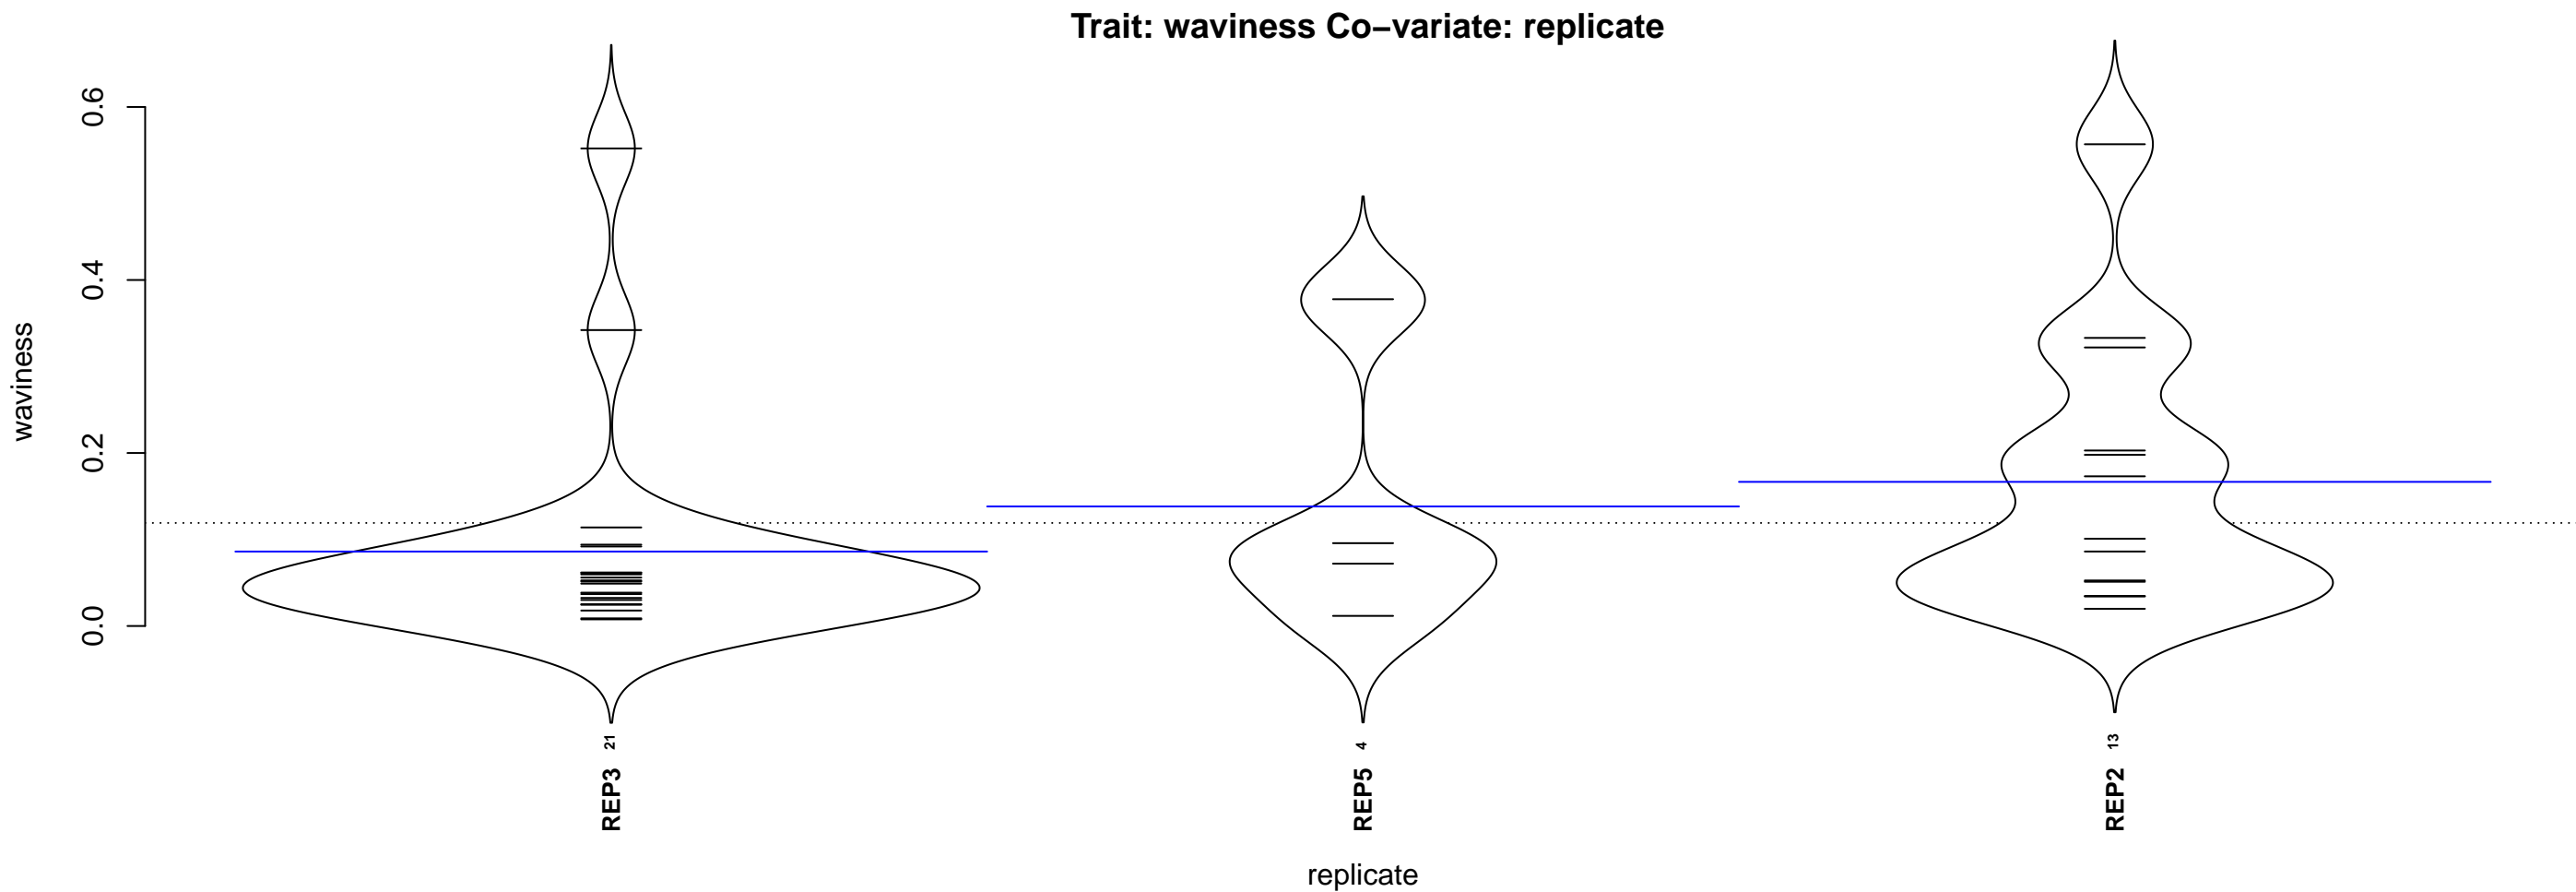

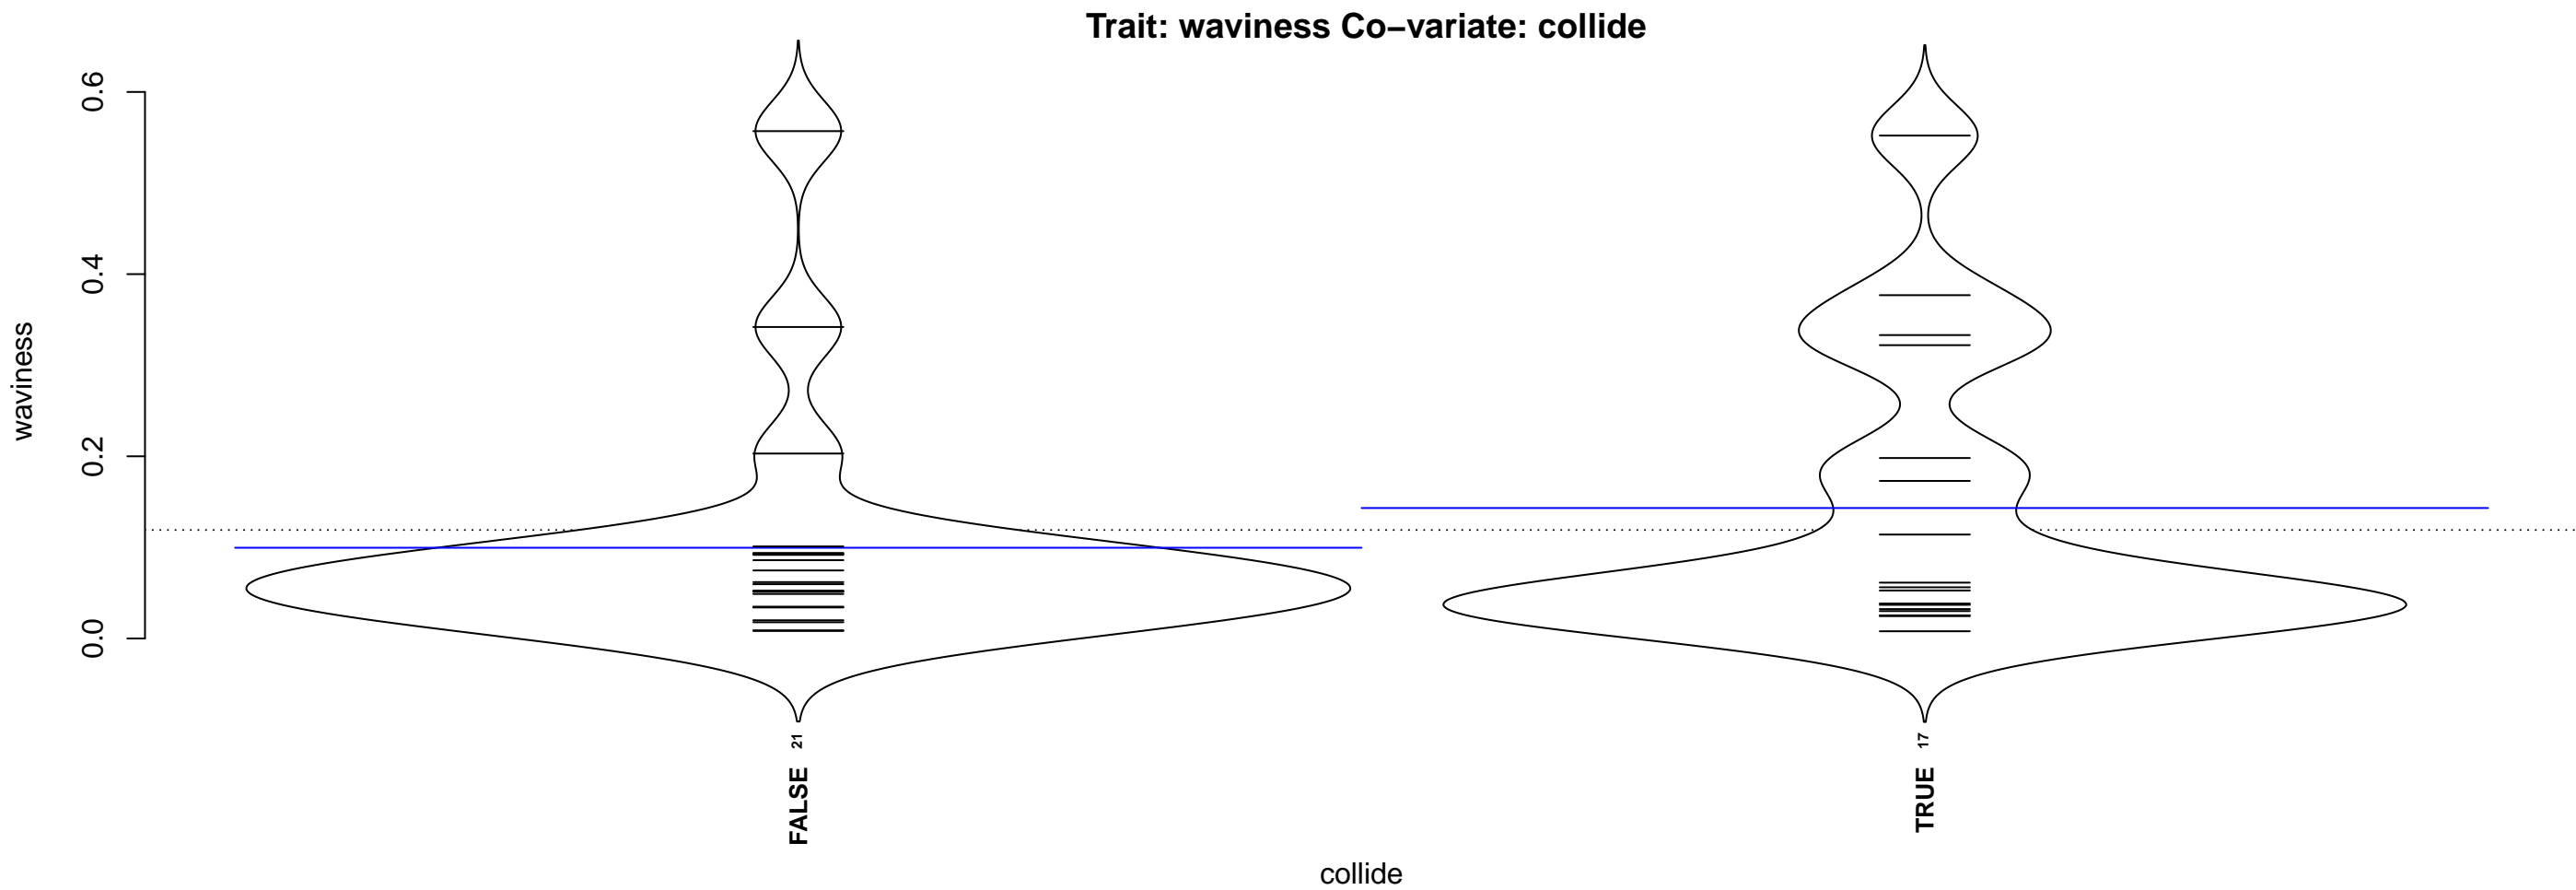

Trait: waviness Co-variate: along

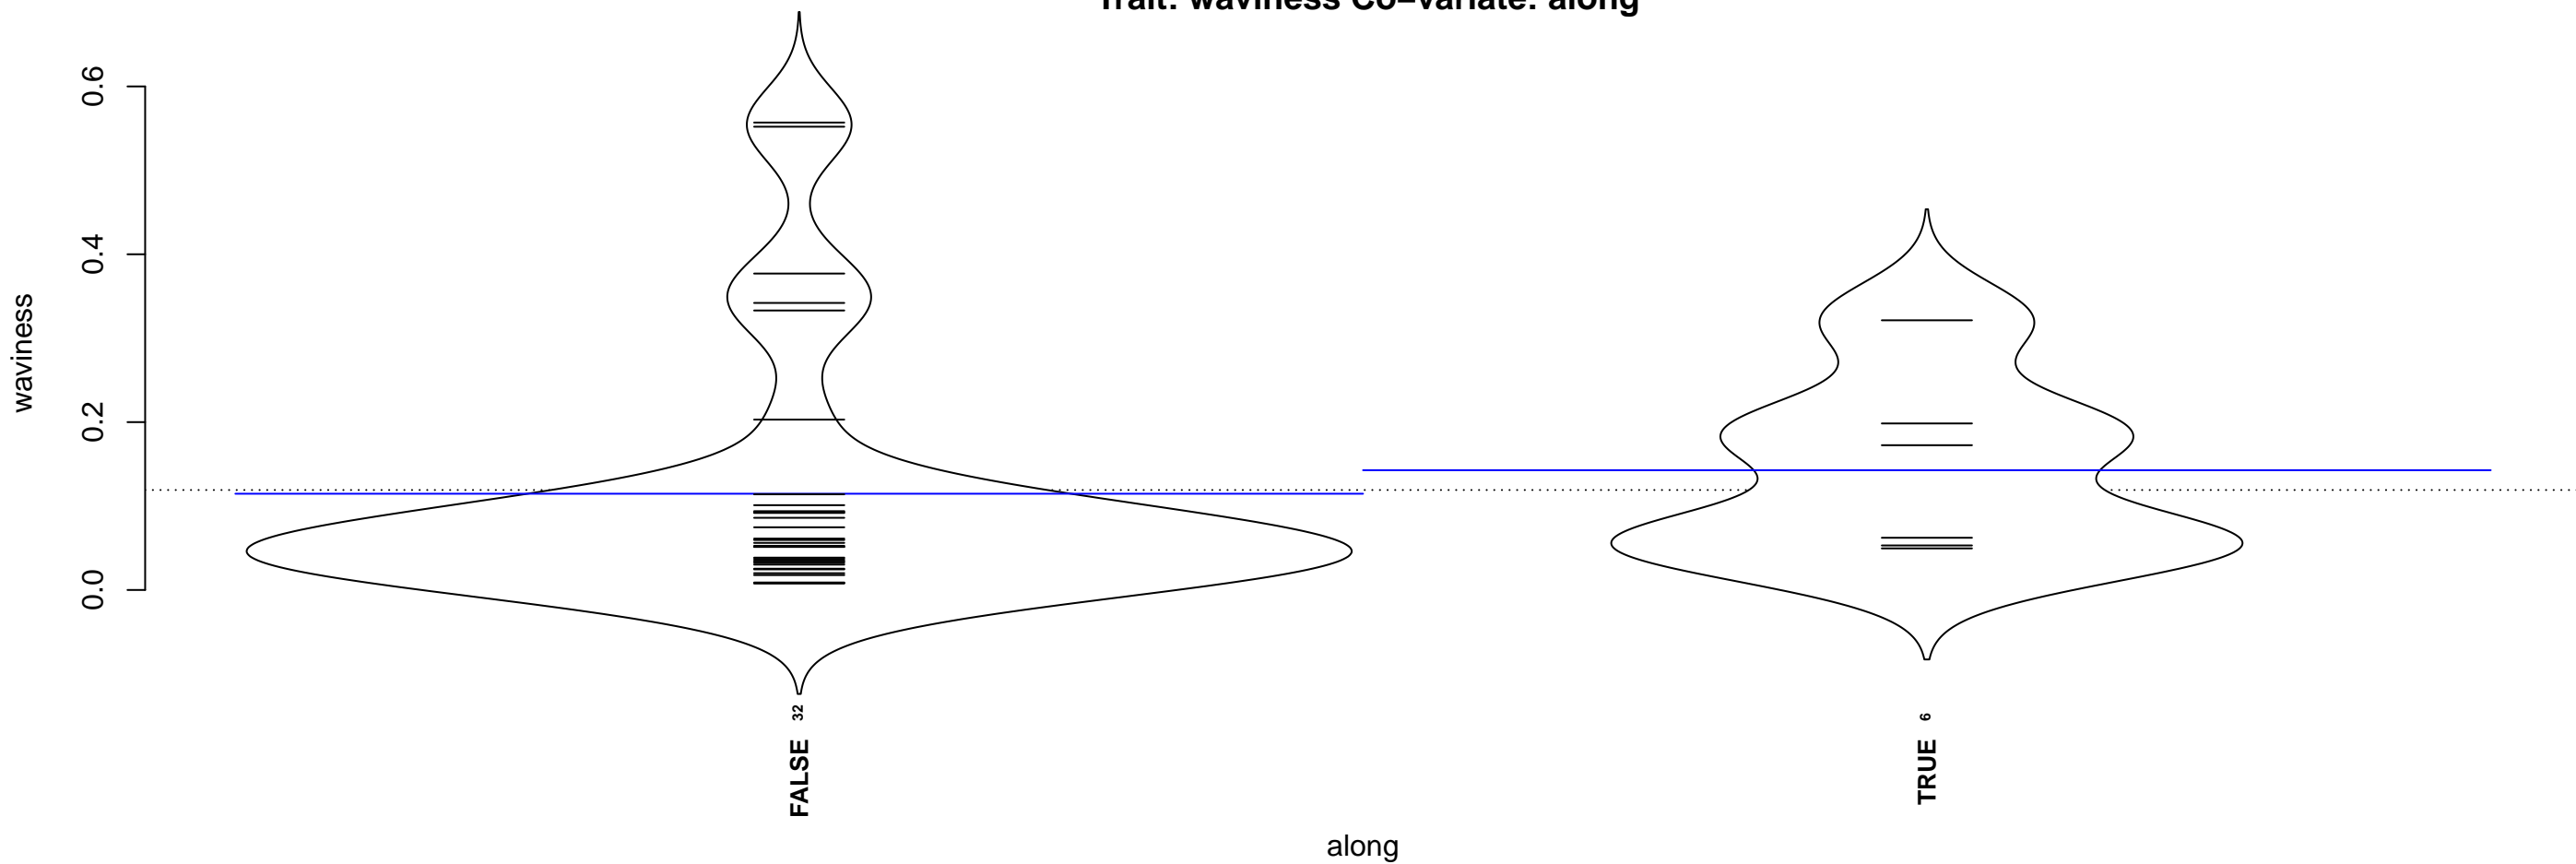

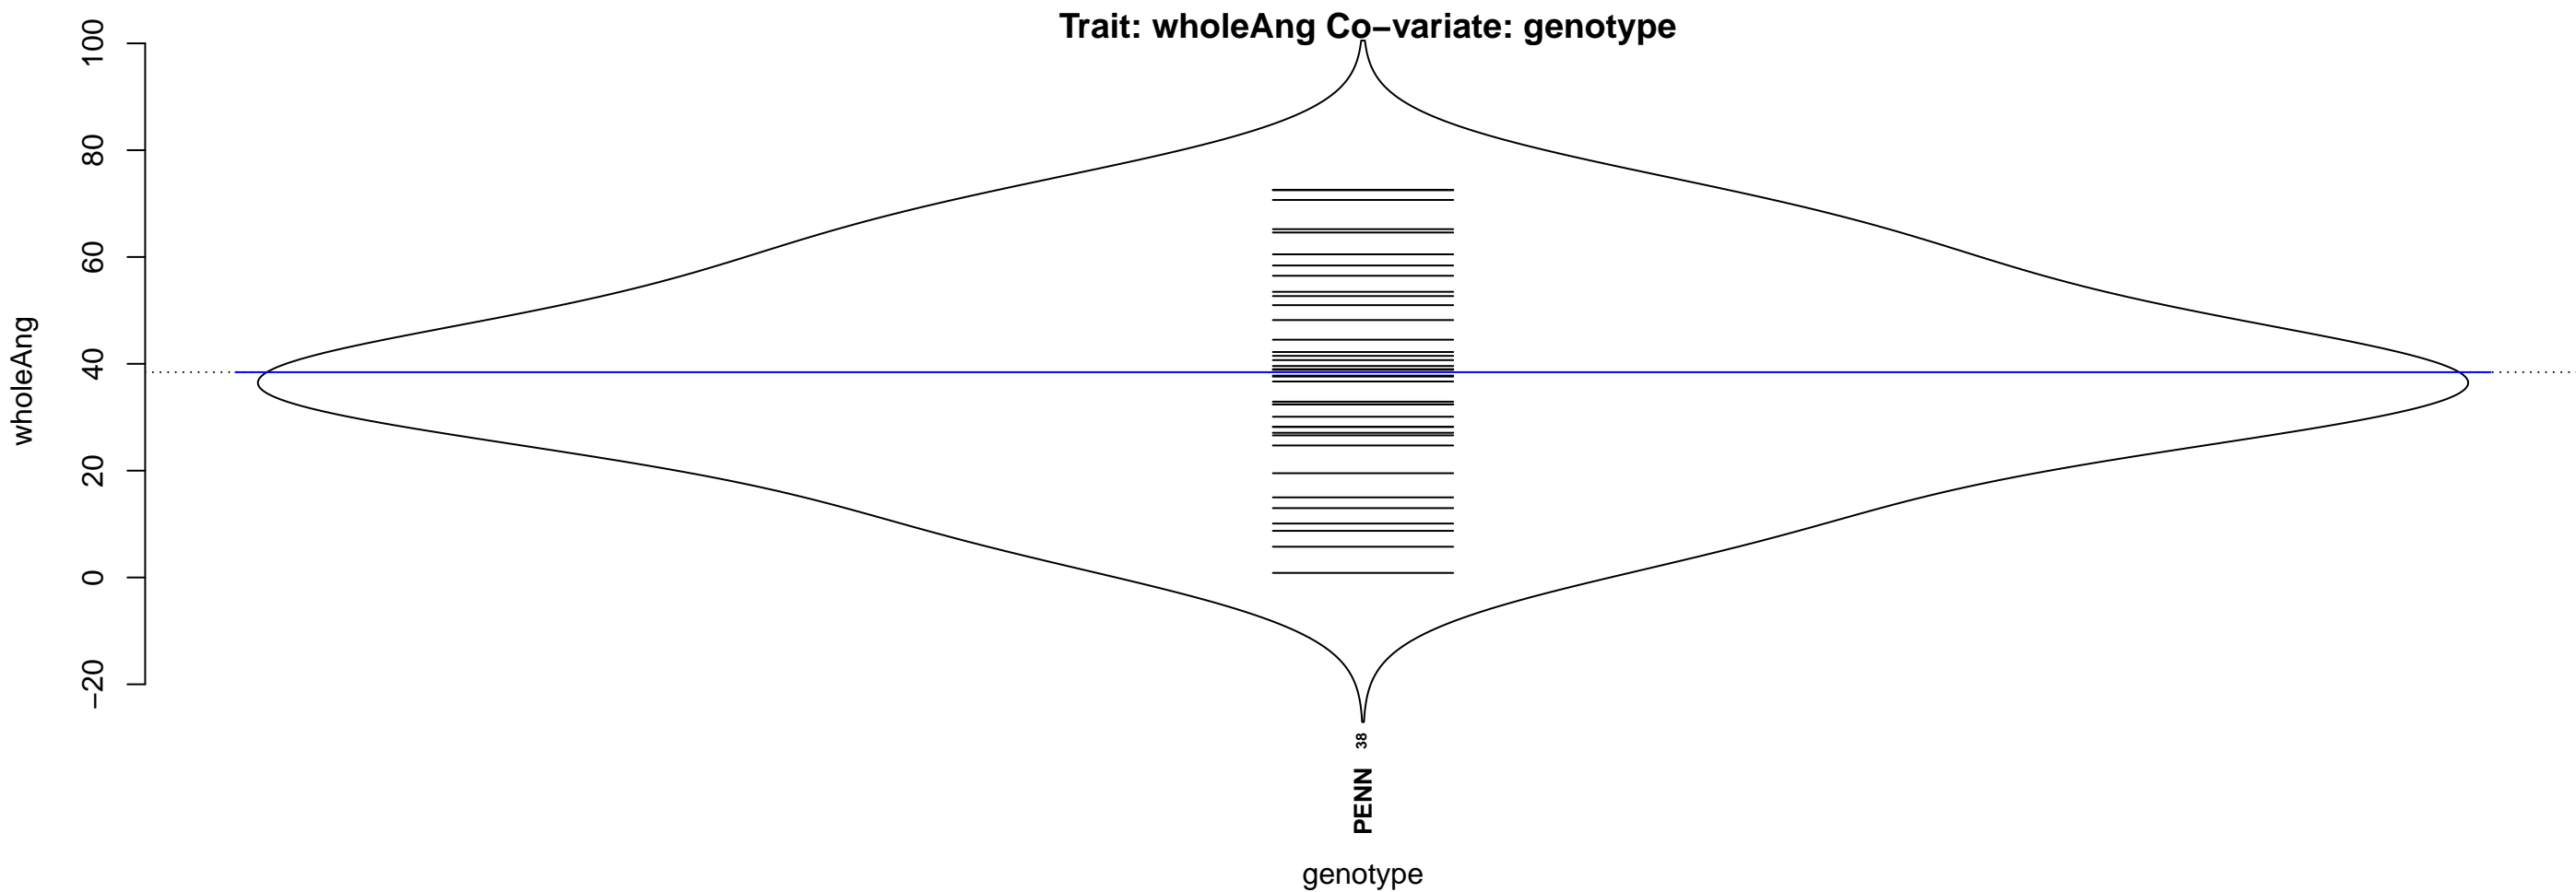

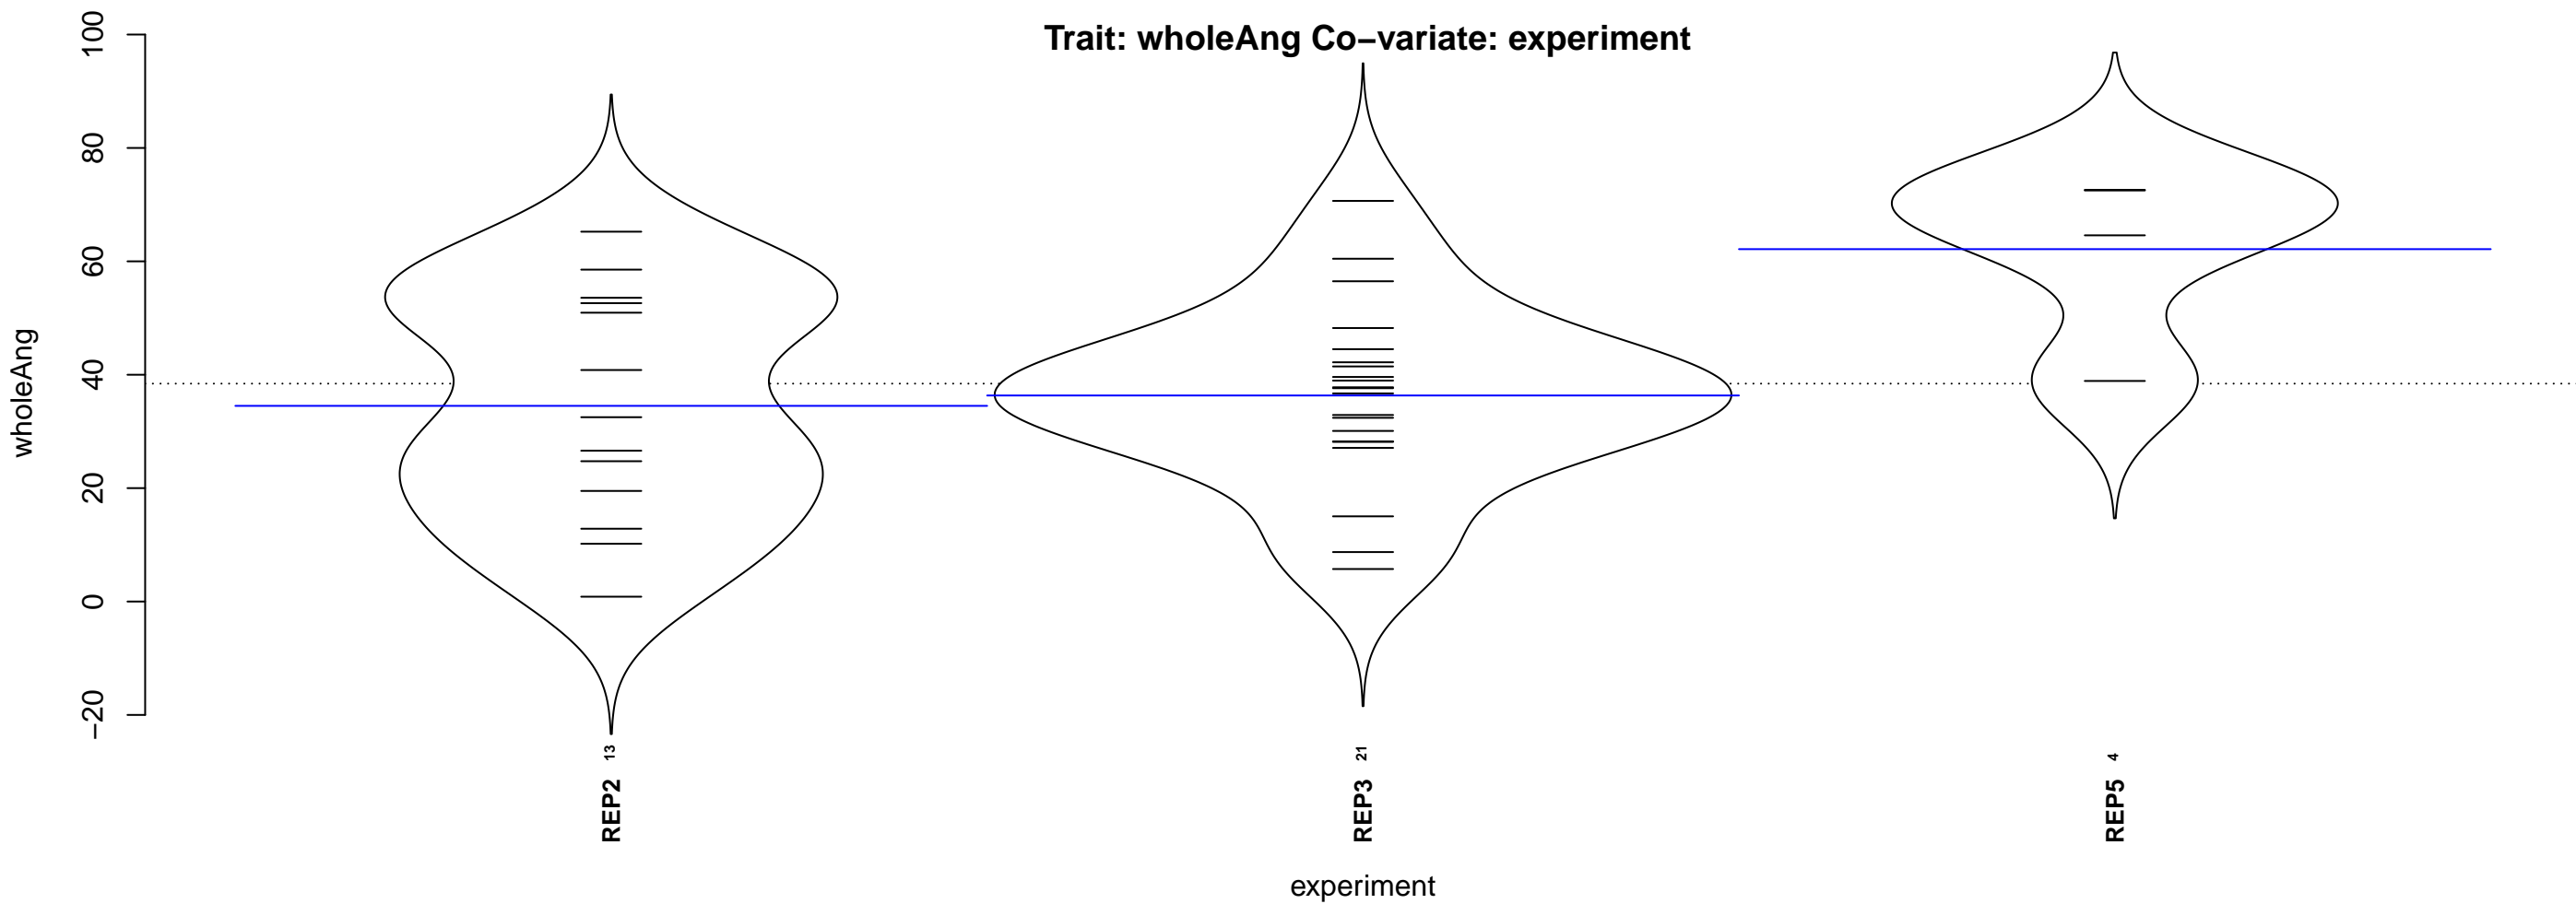

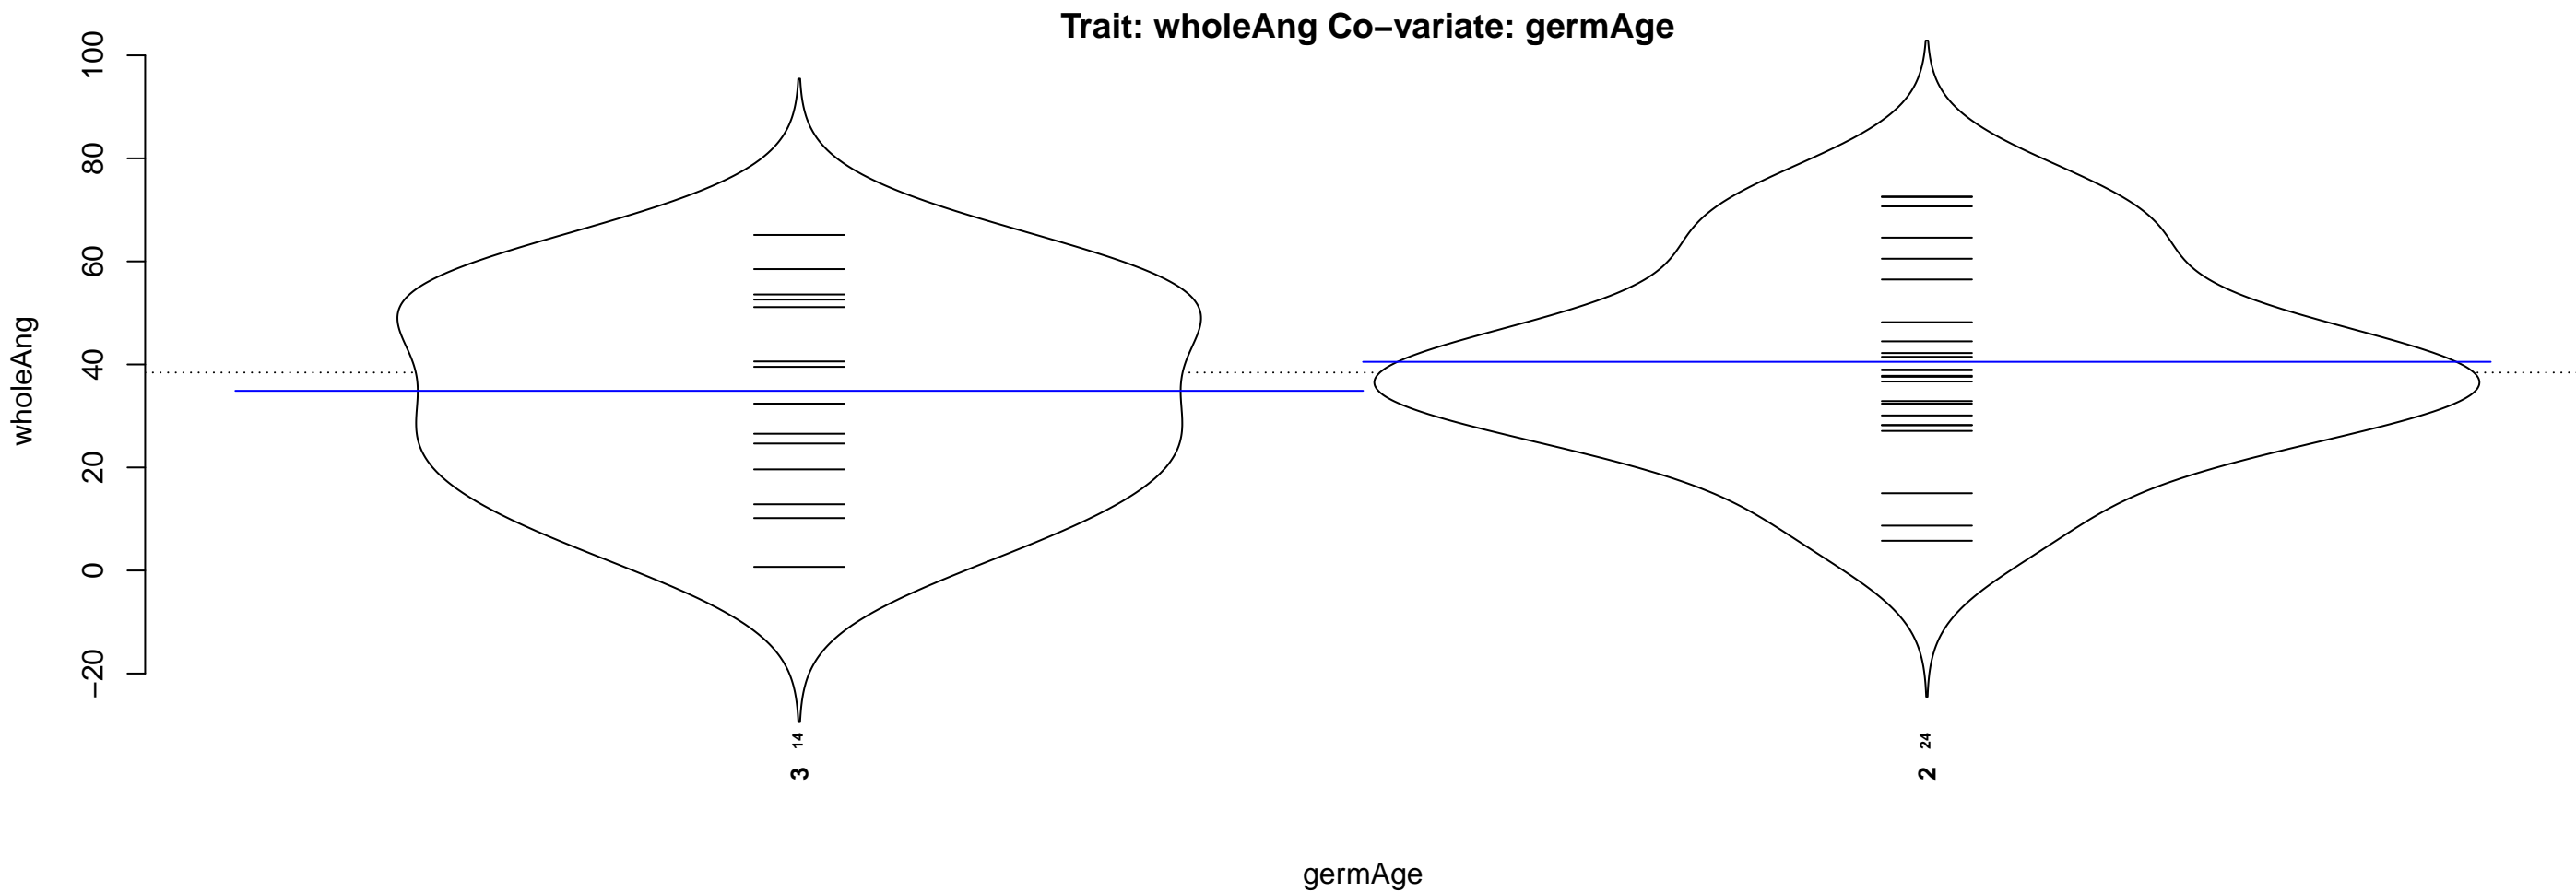



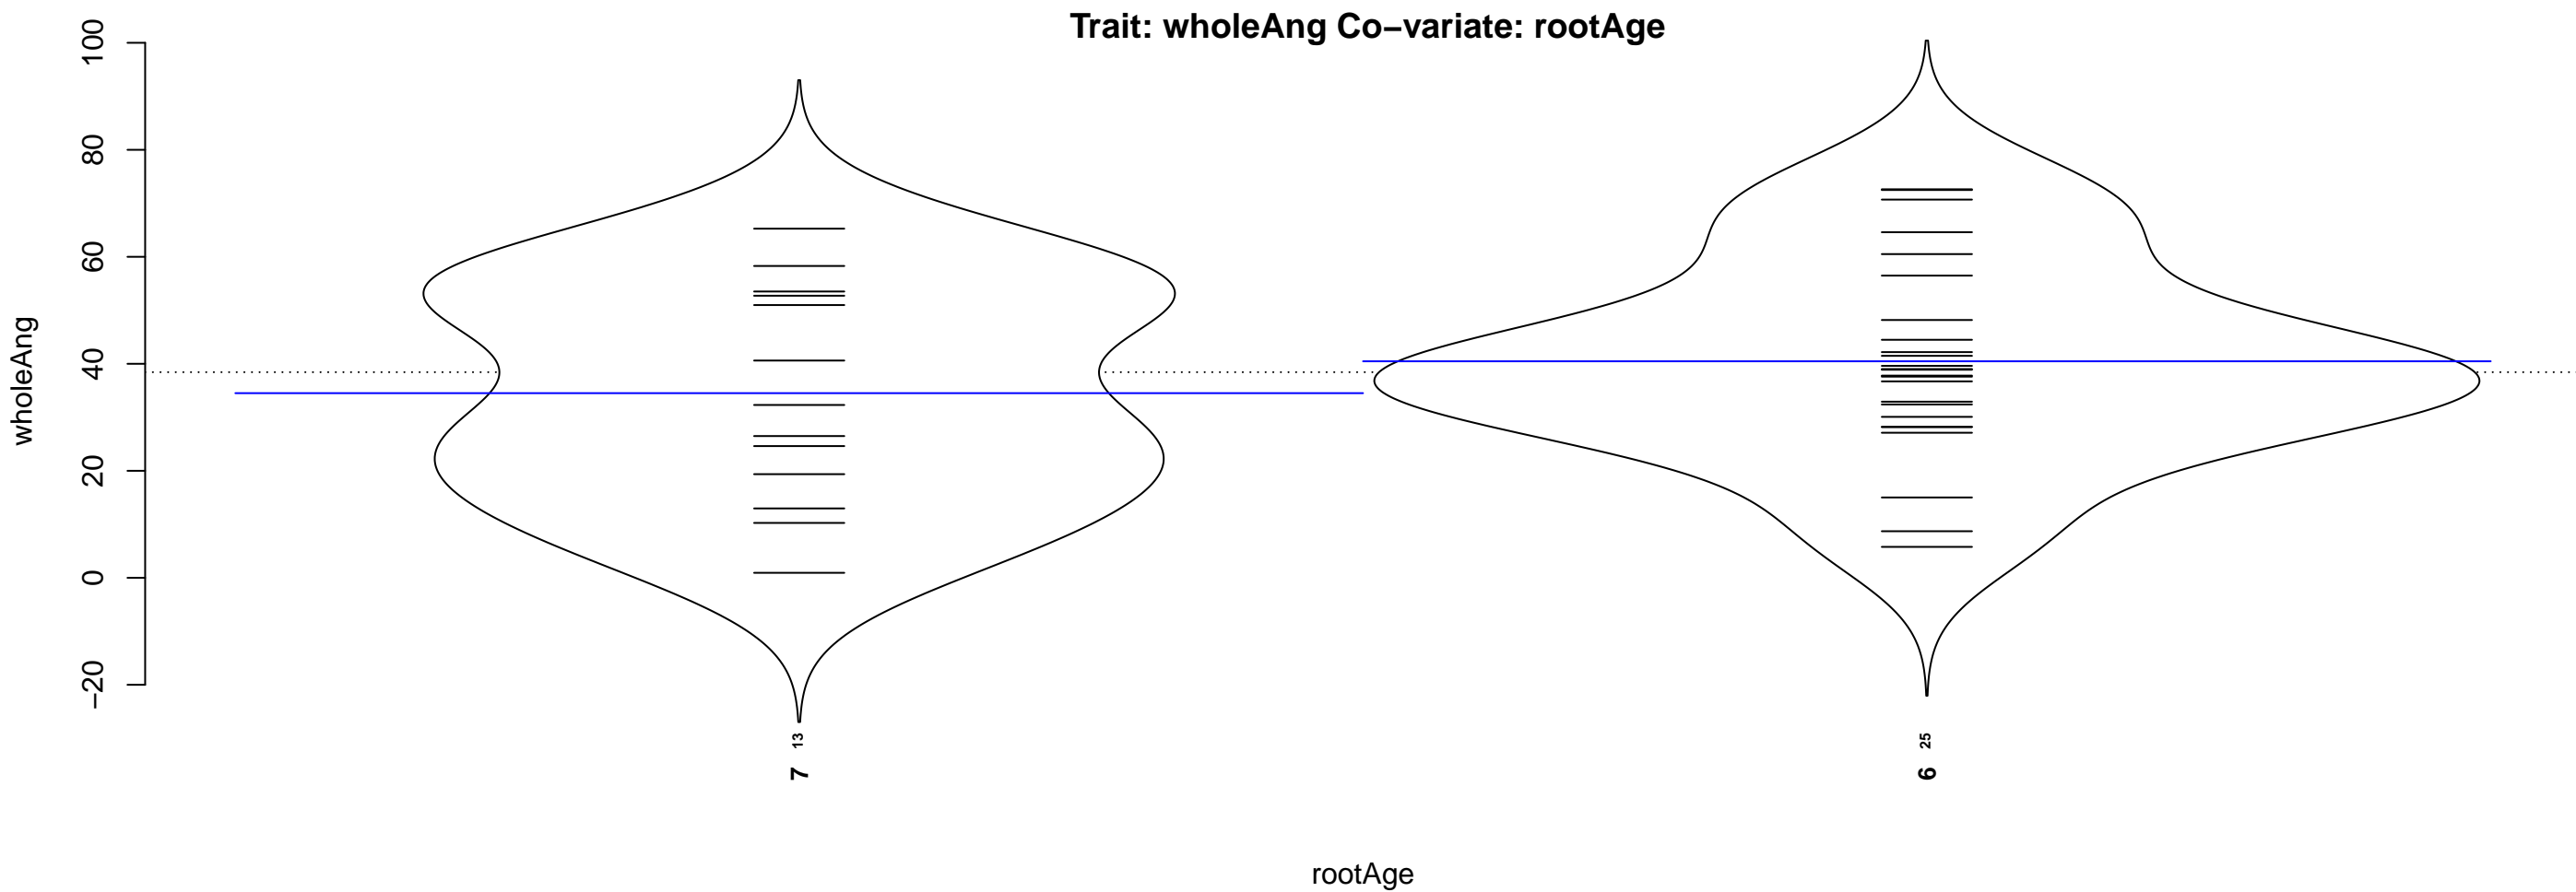

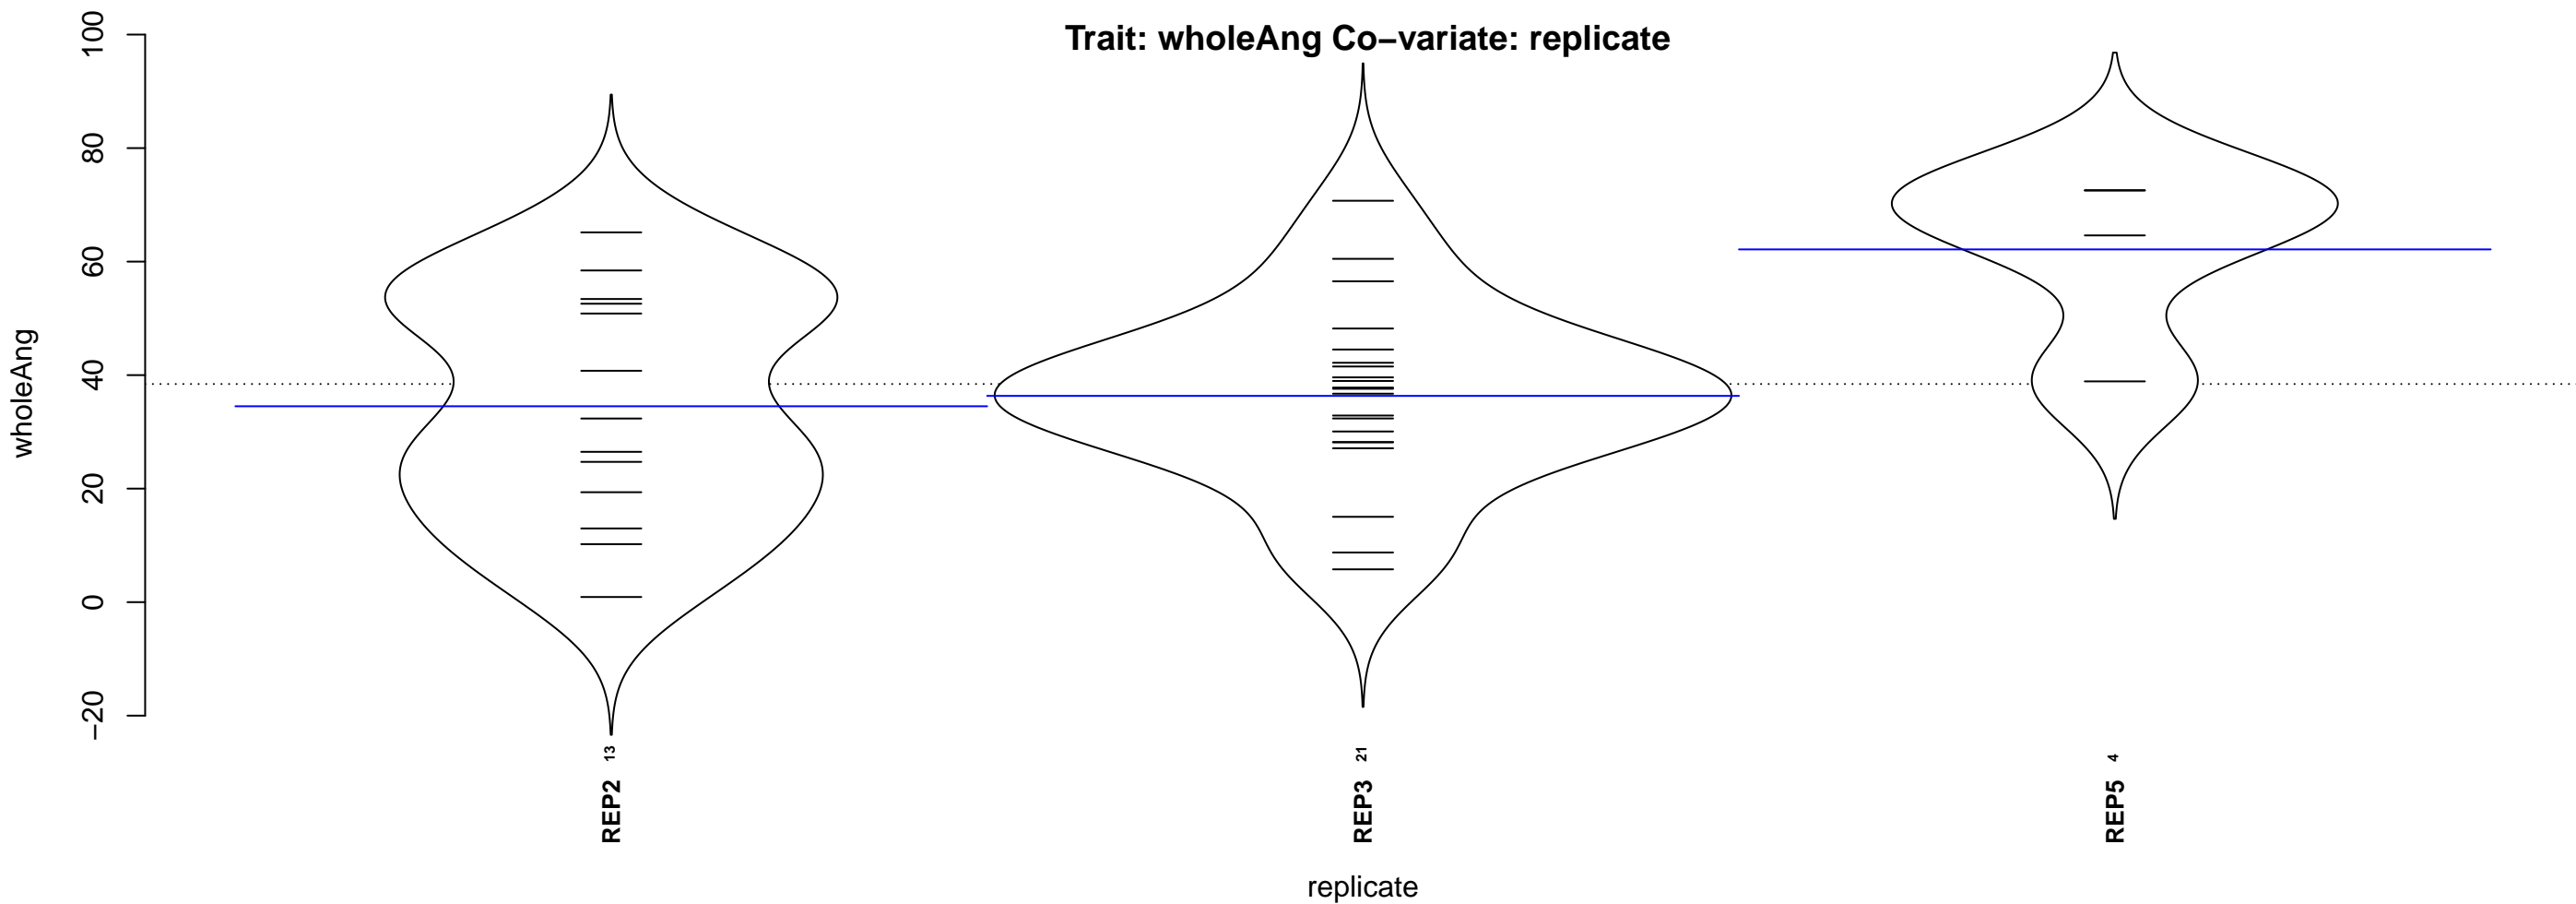

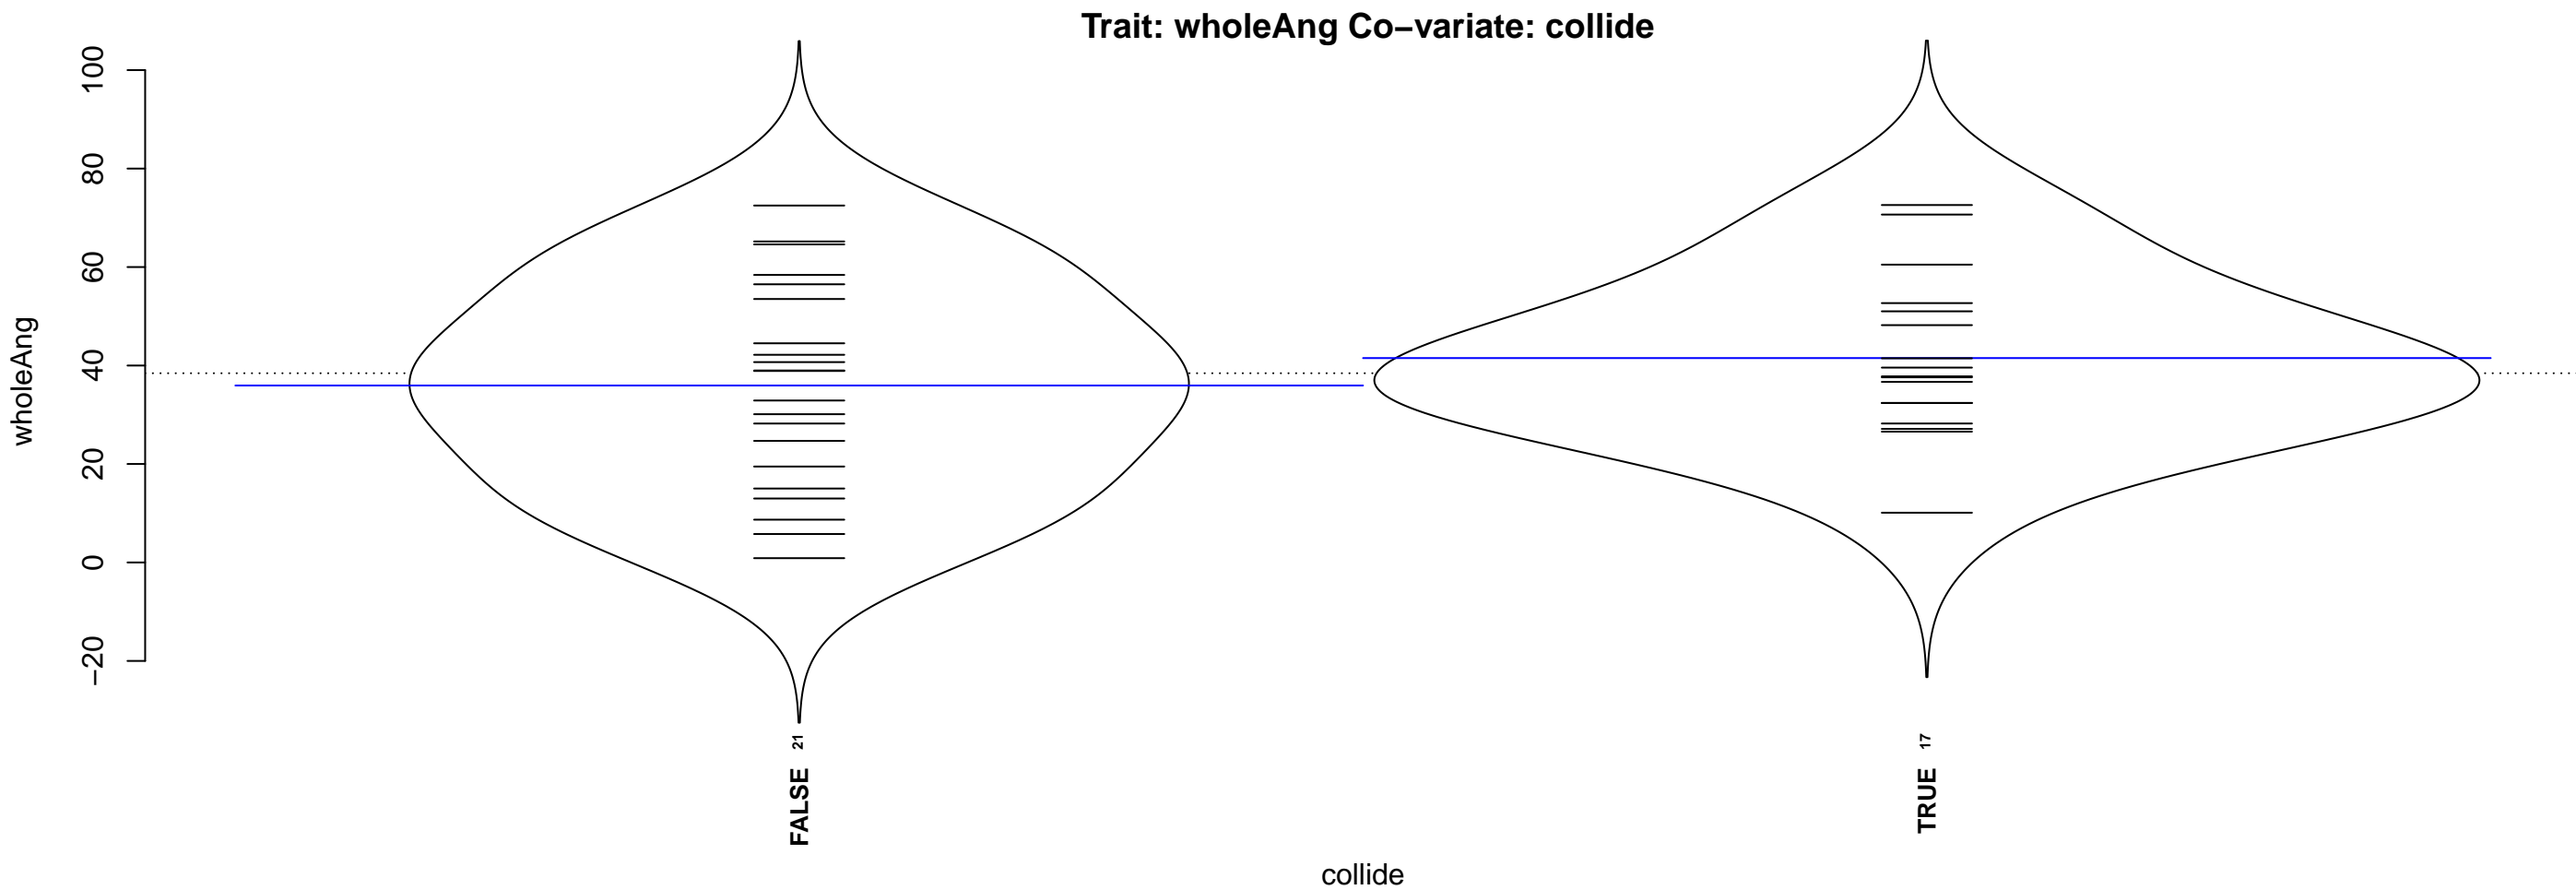

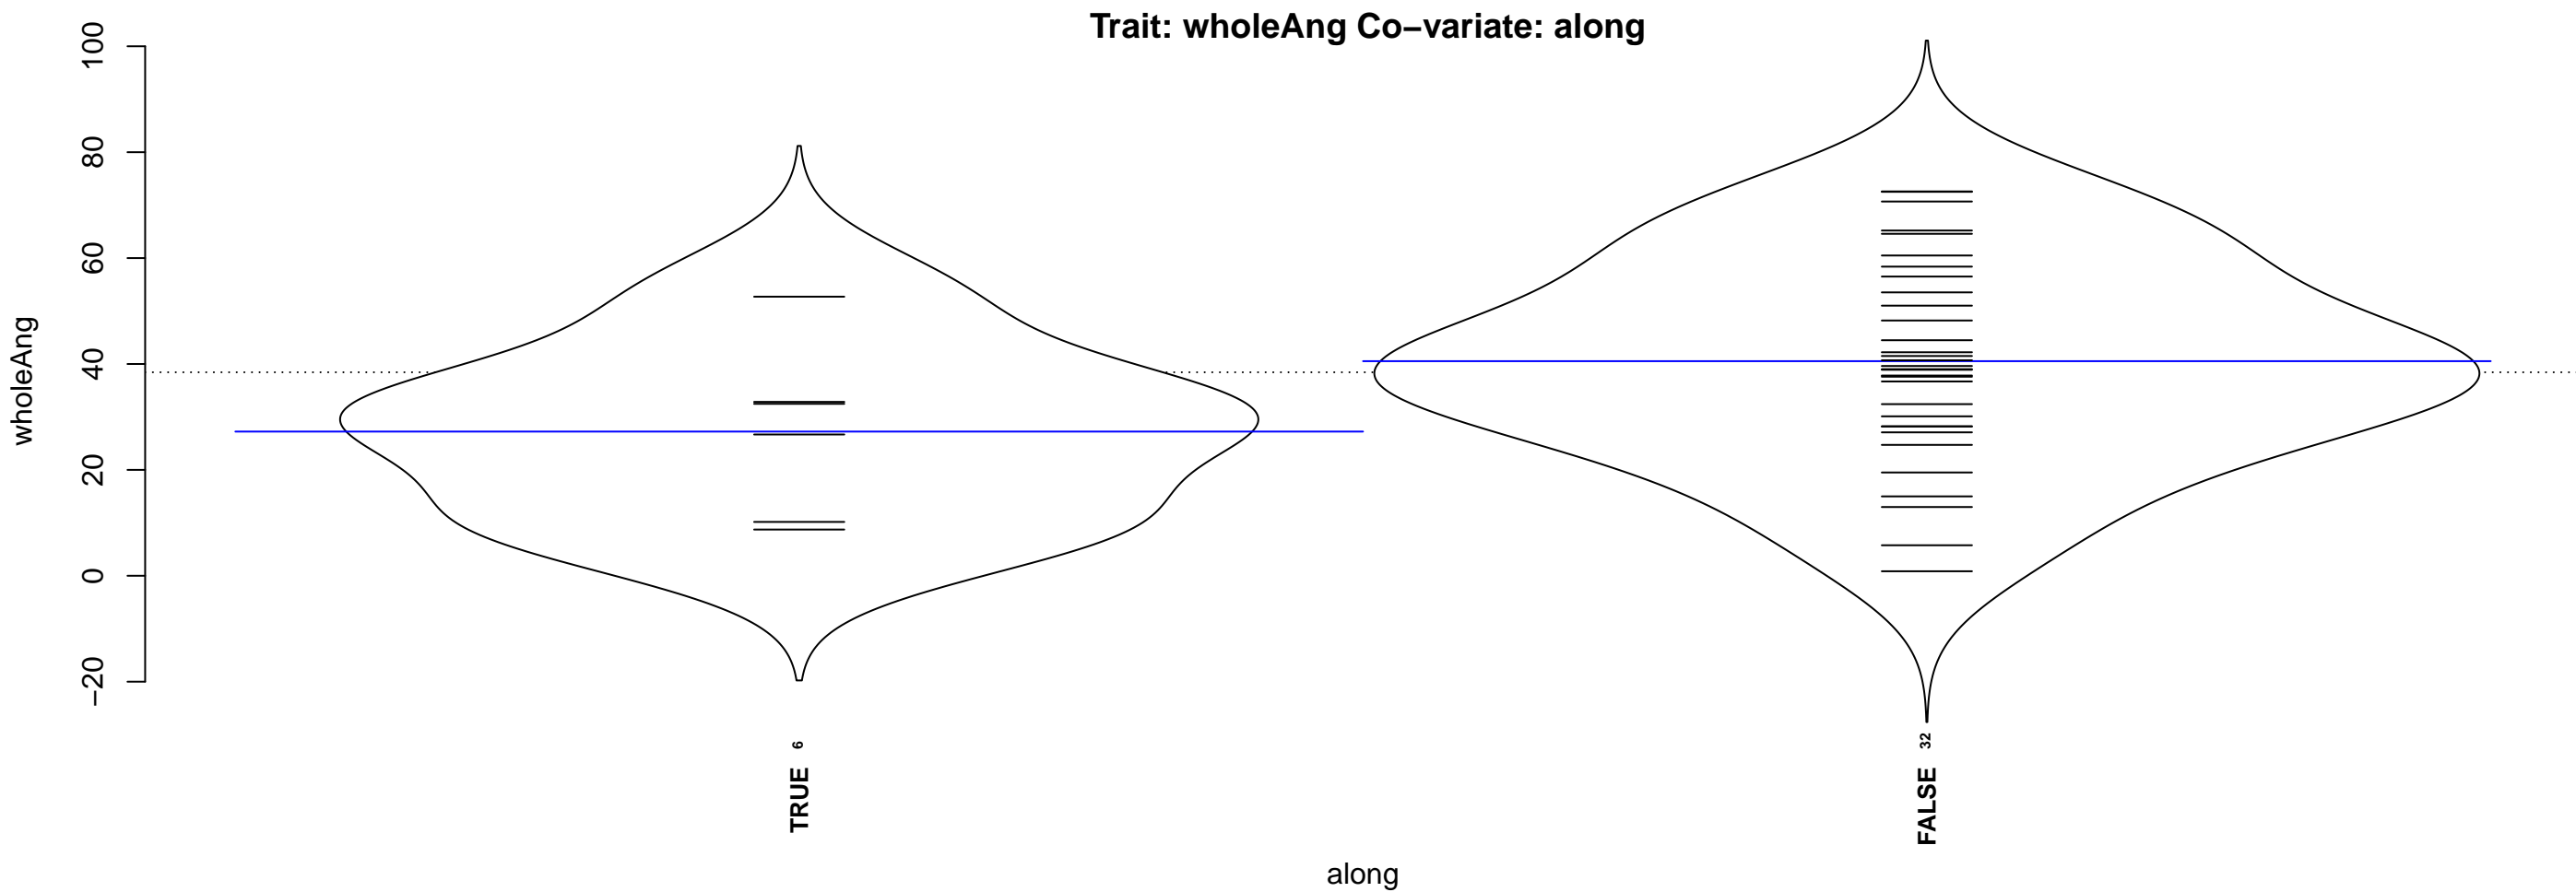

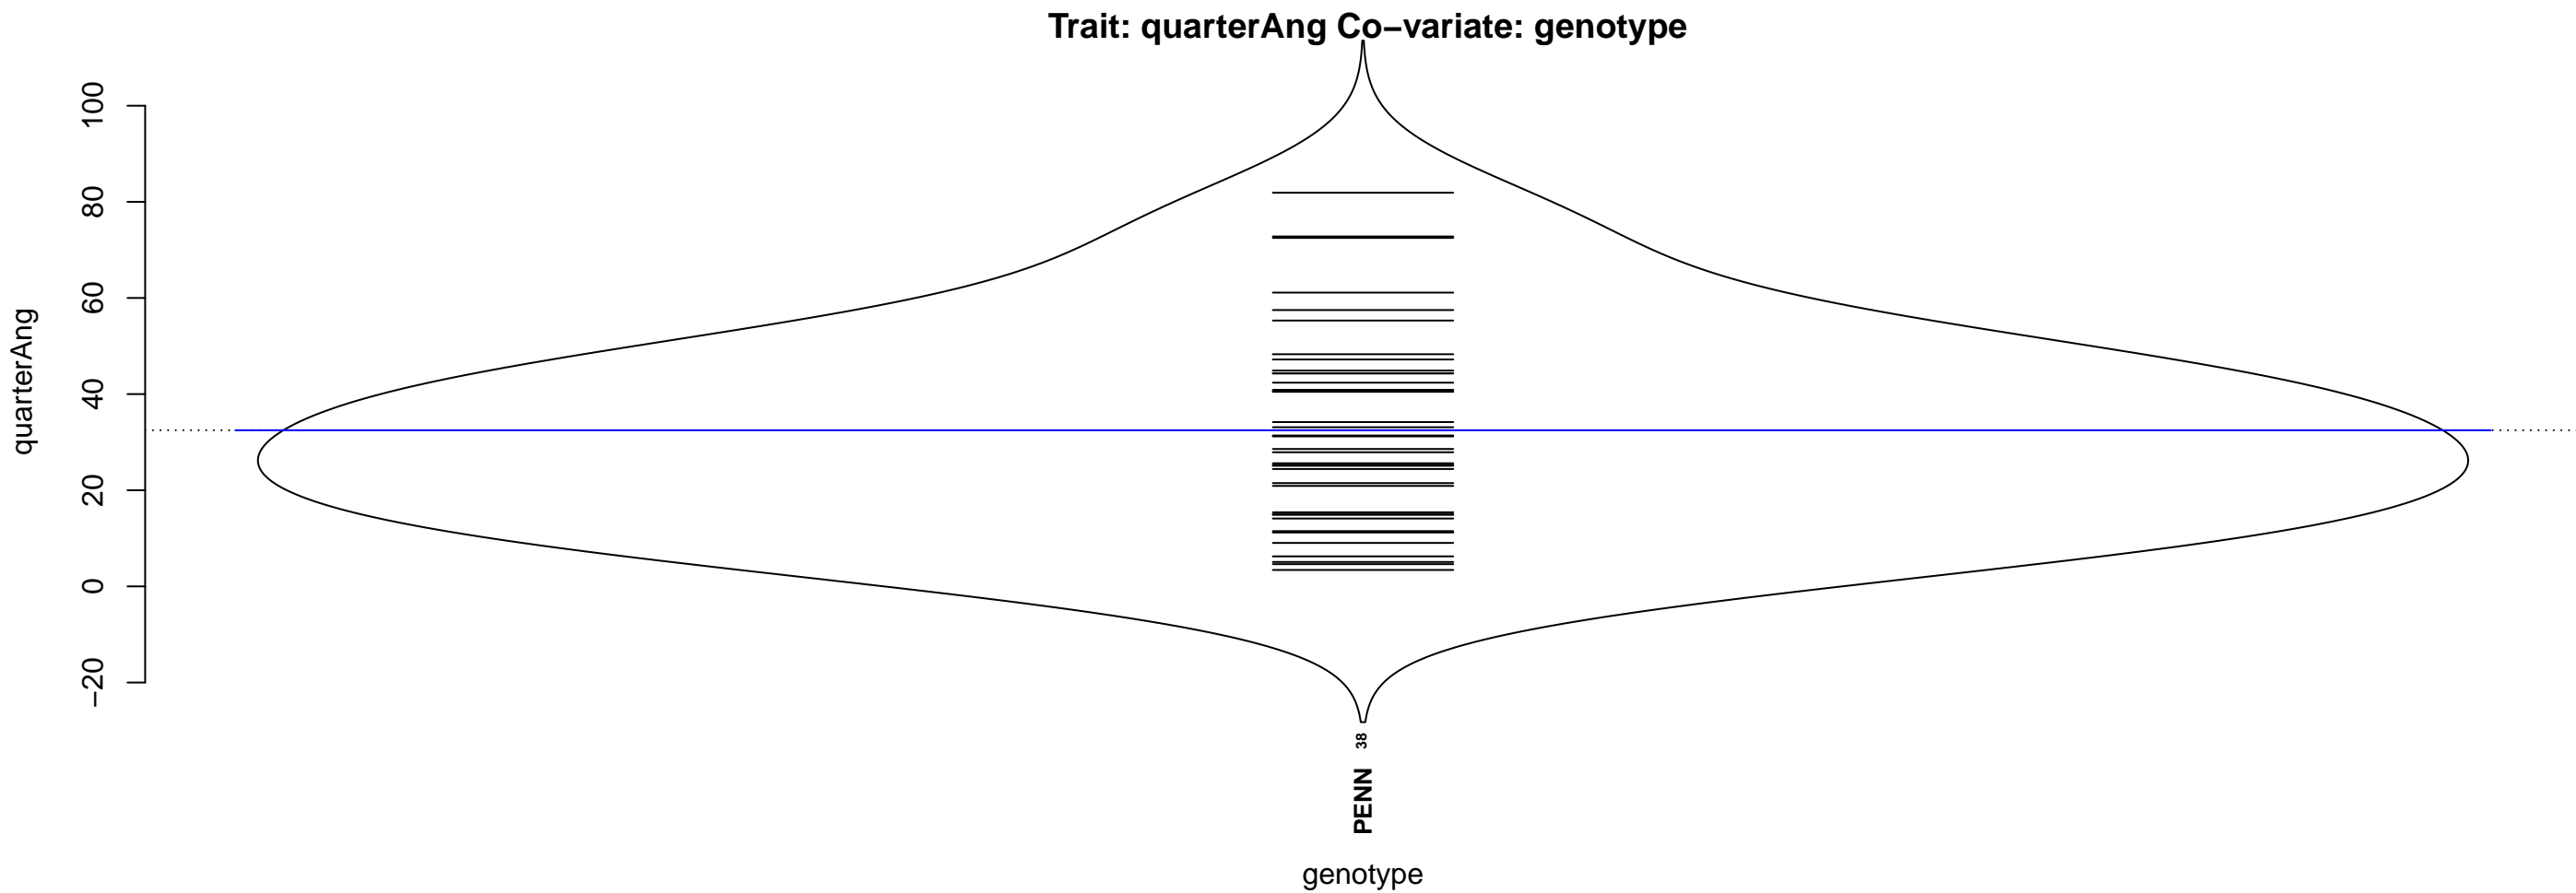

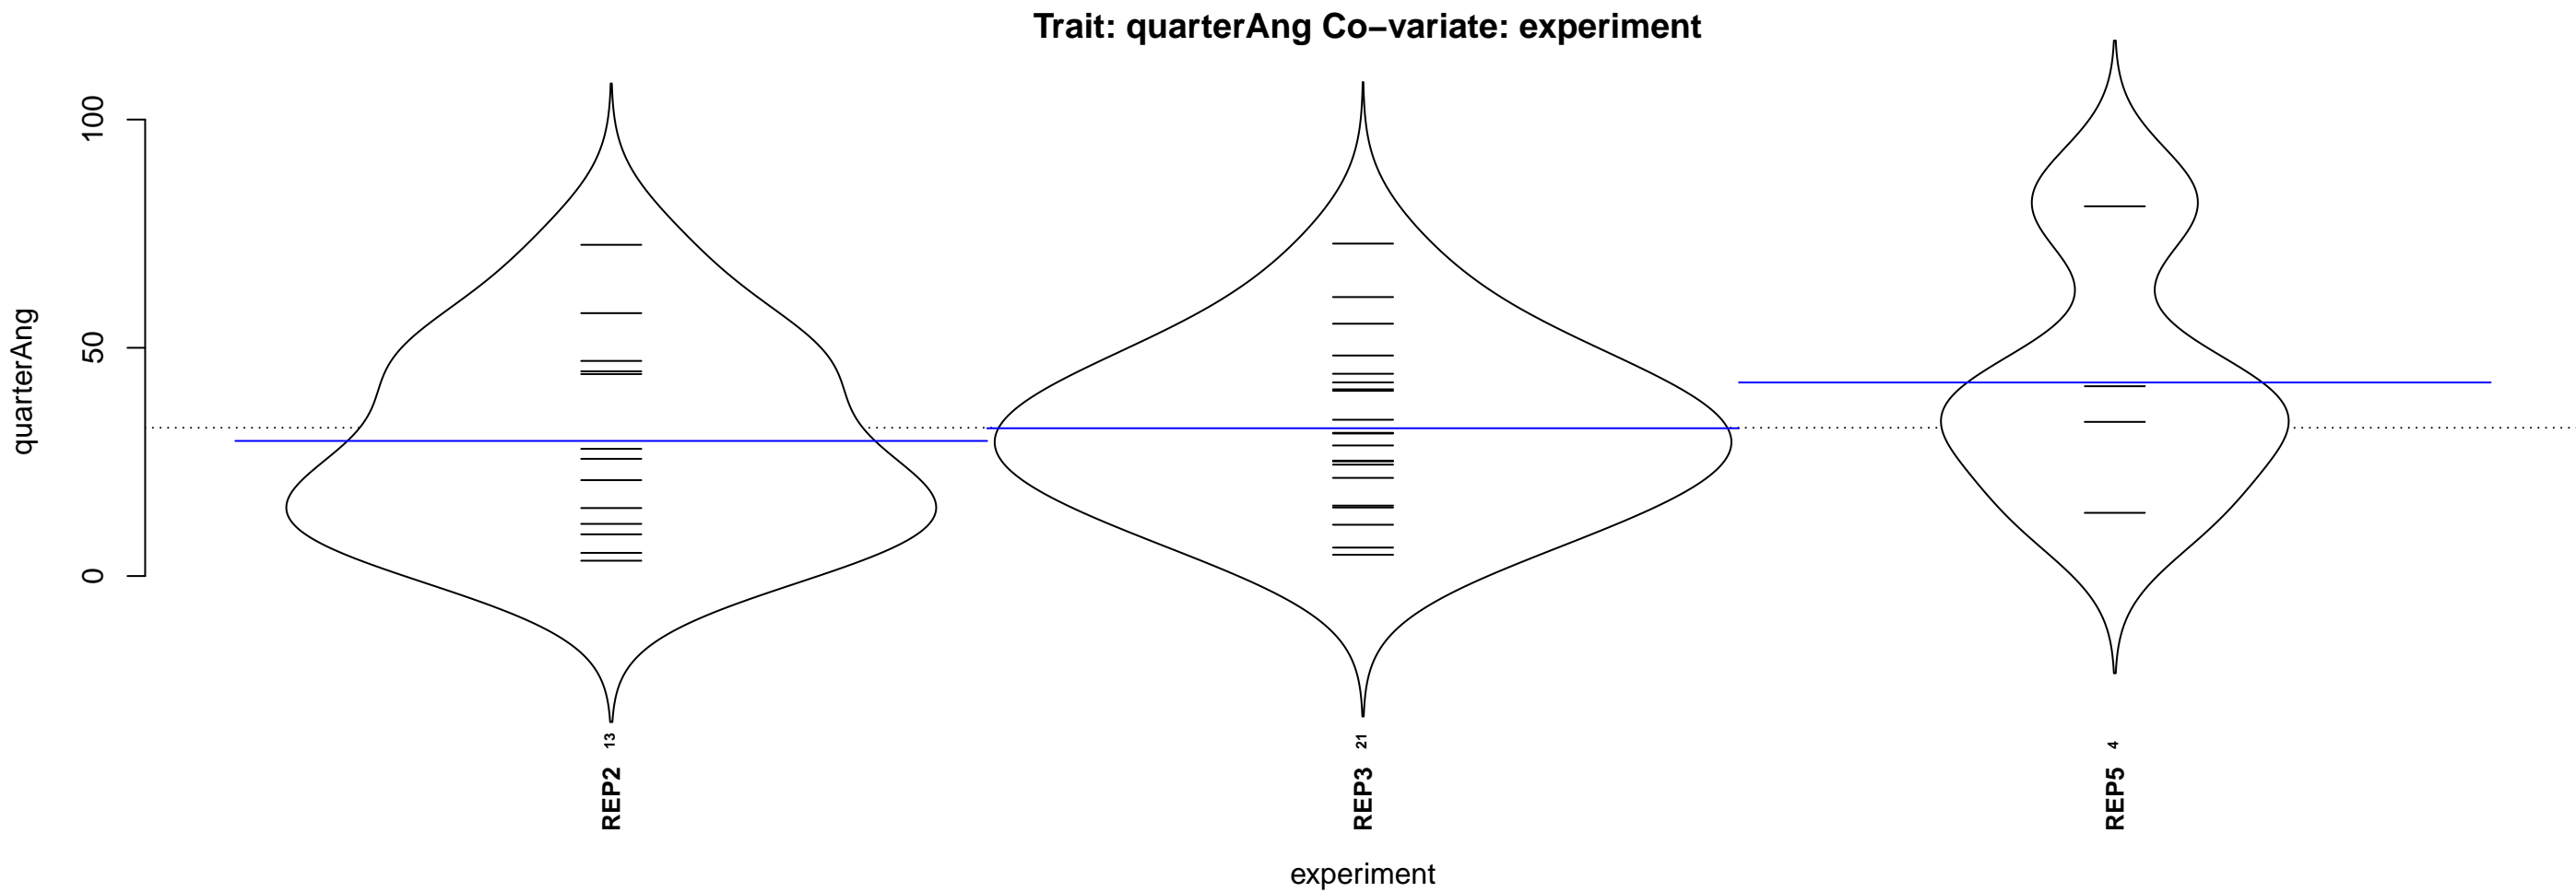

Trait: quarterAng Co-variate: germAge

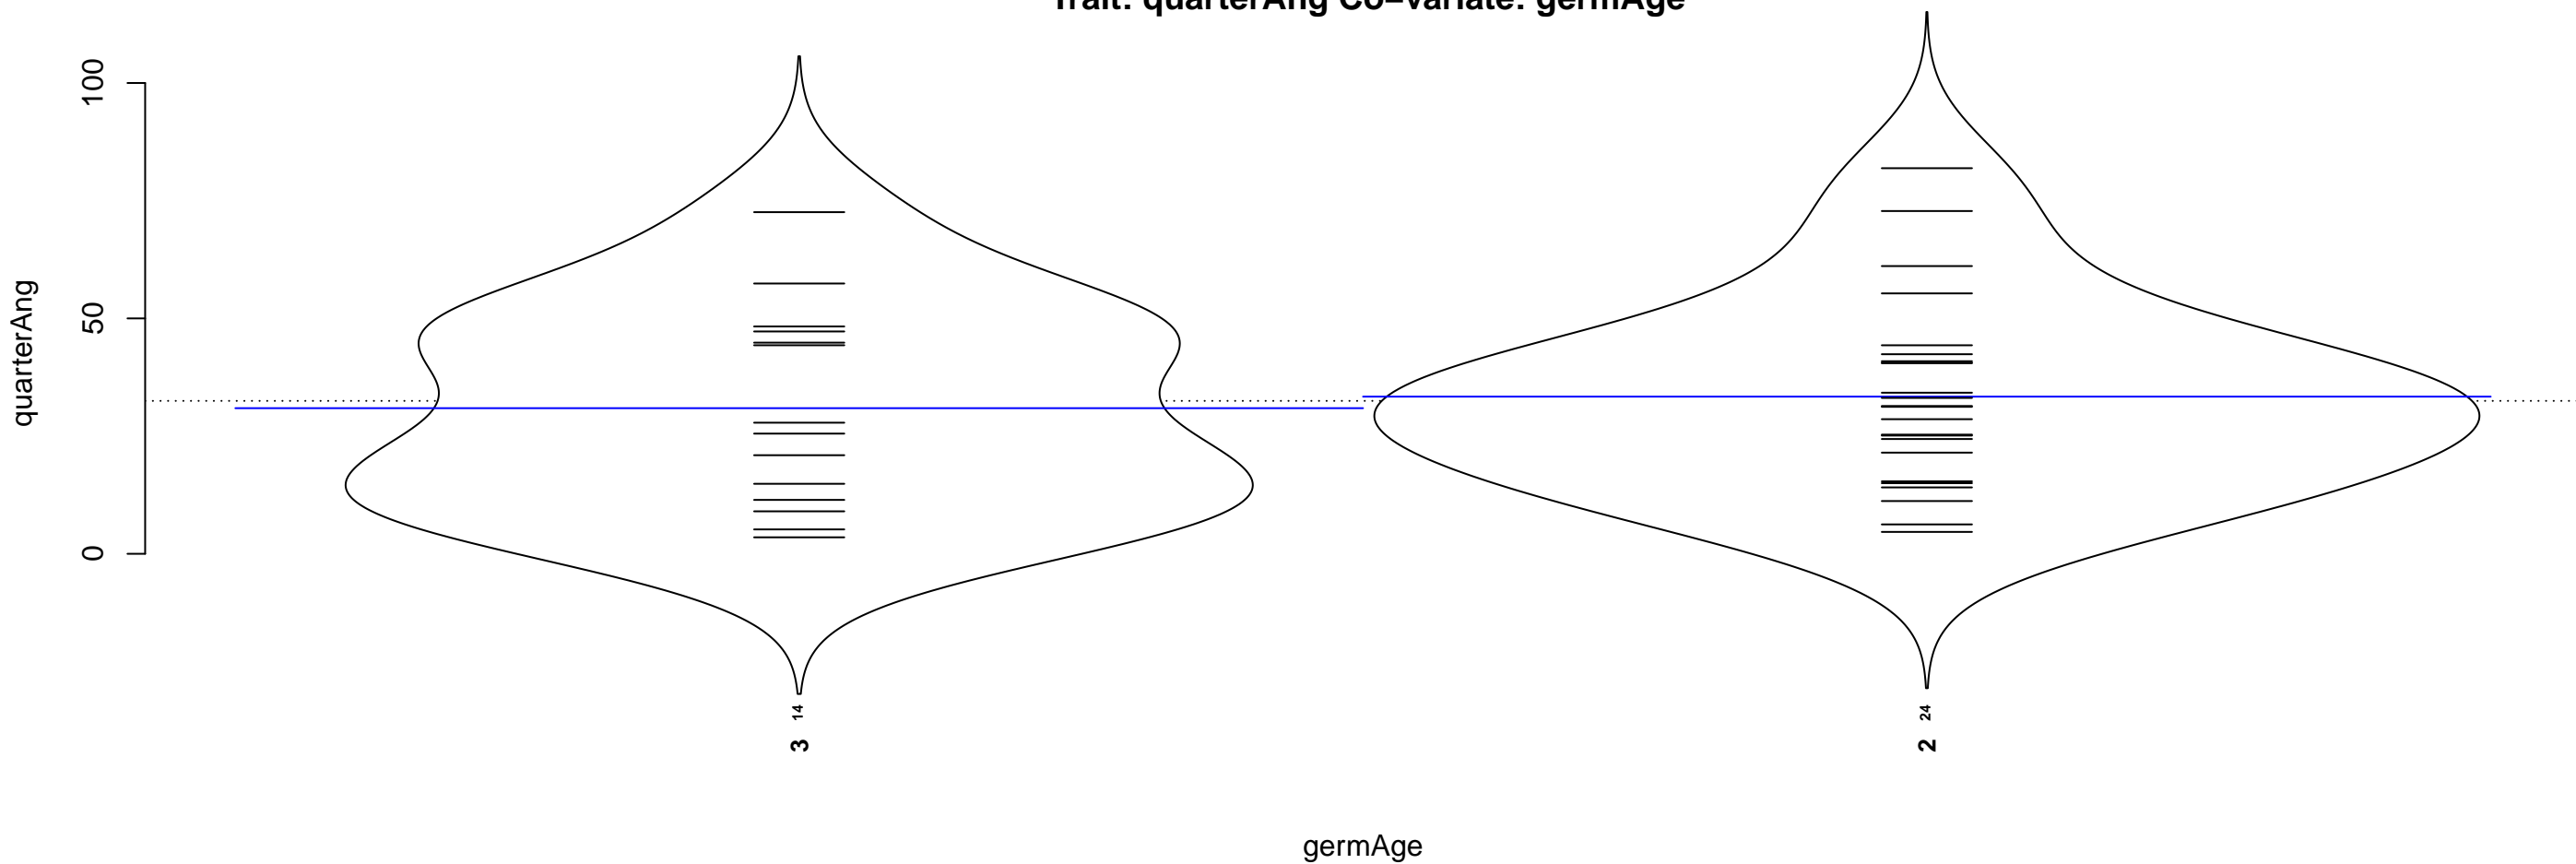

Trait: quarterAng Co-variate: rootAge

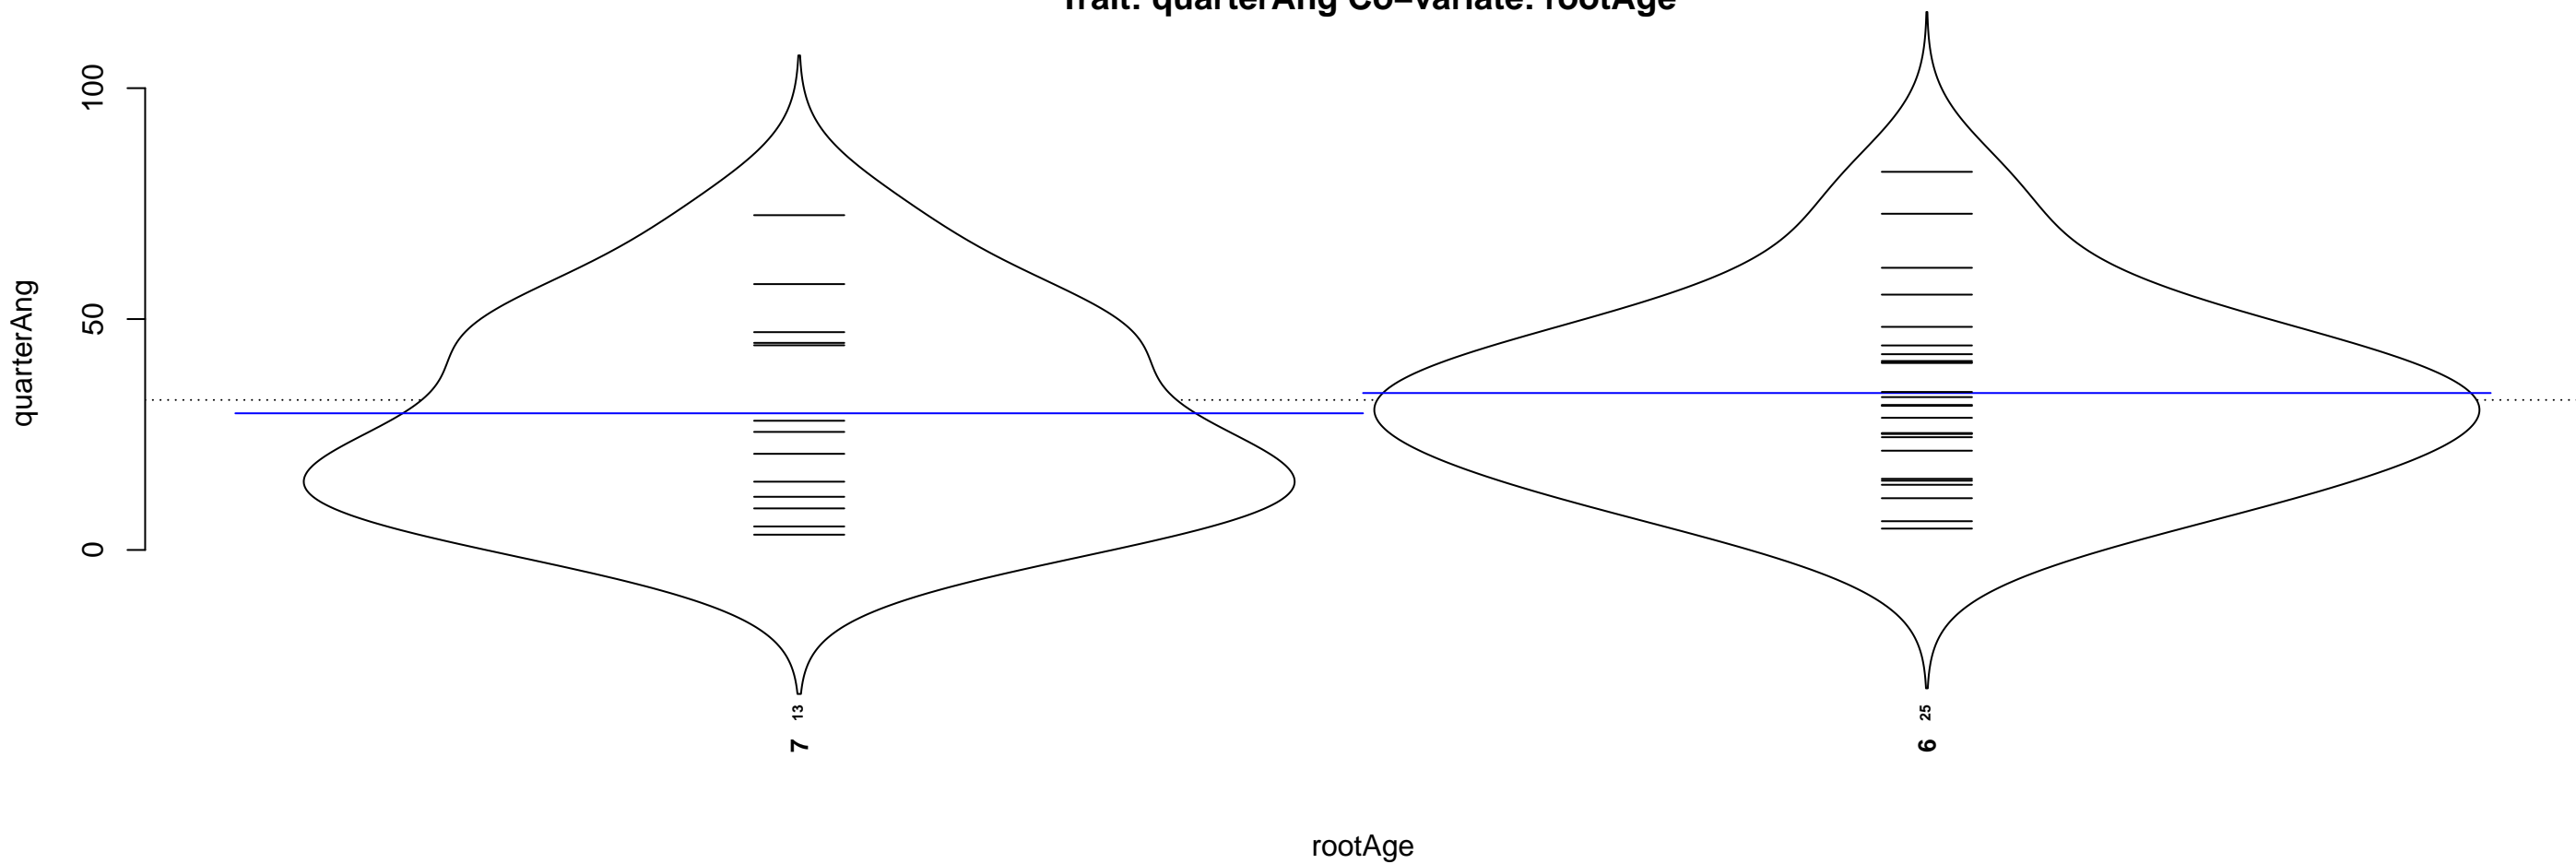



Trait: quarterAng Co-variate: replicate

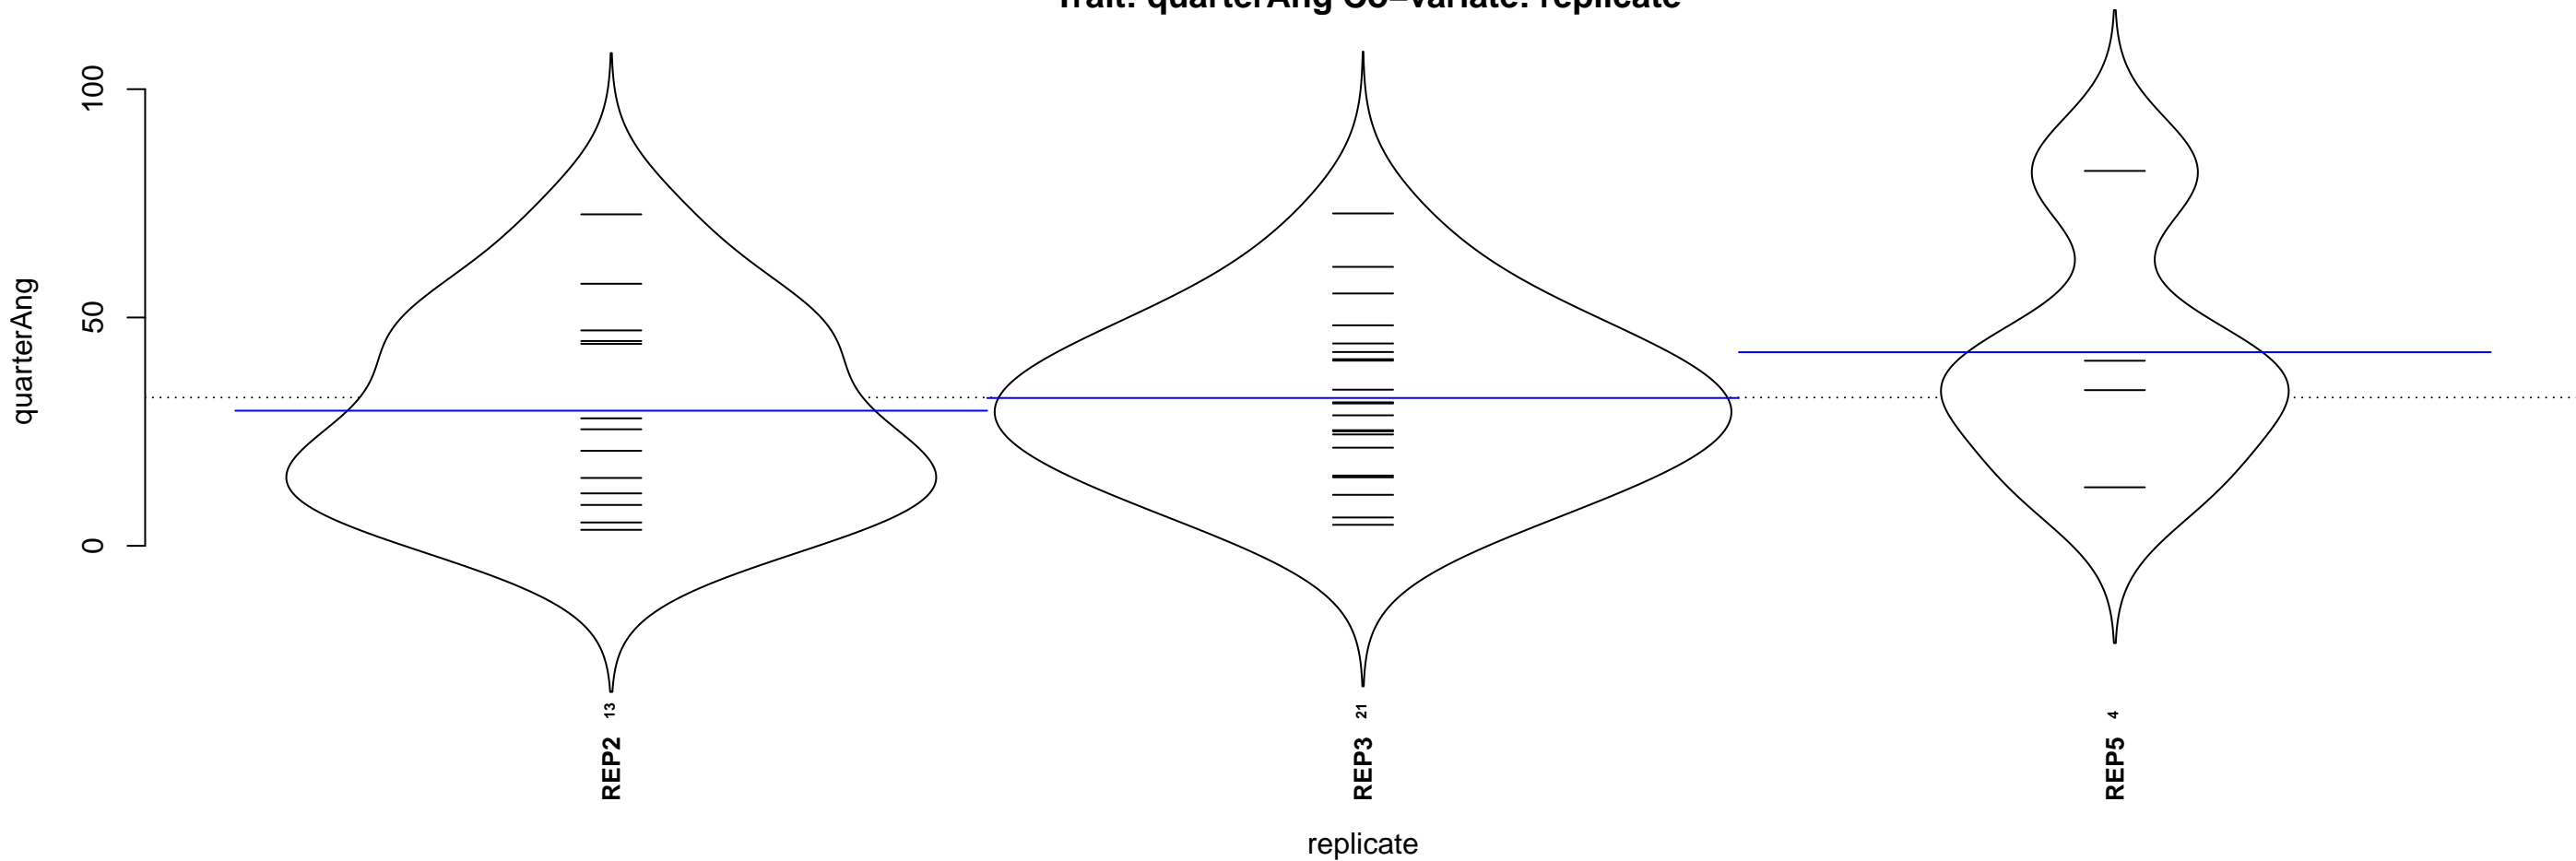

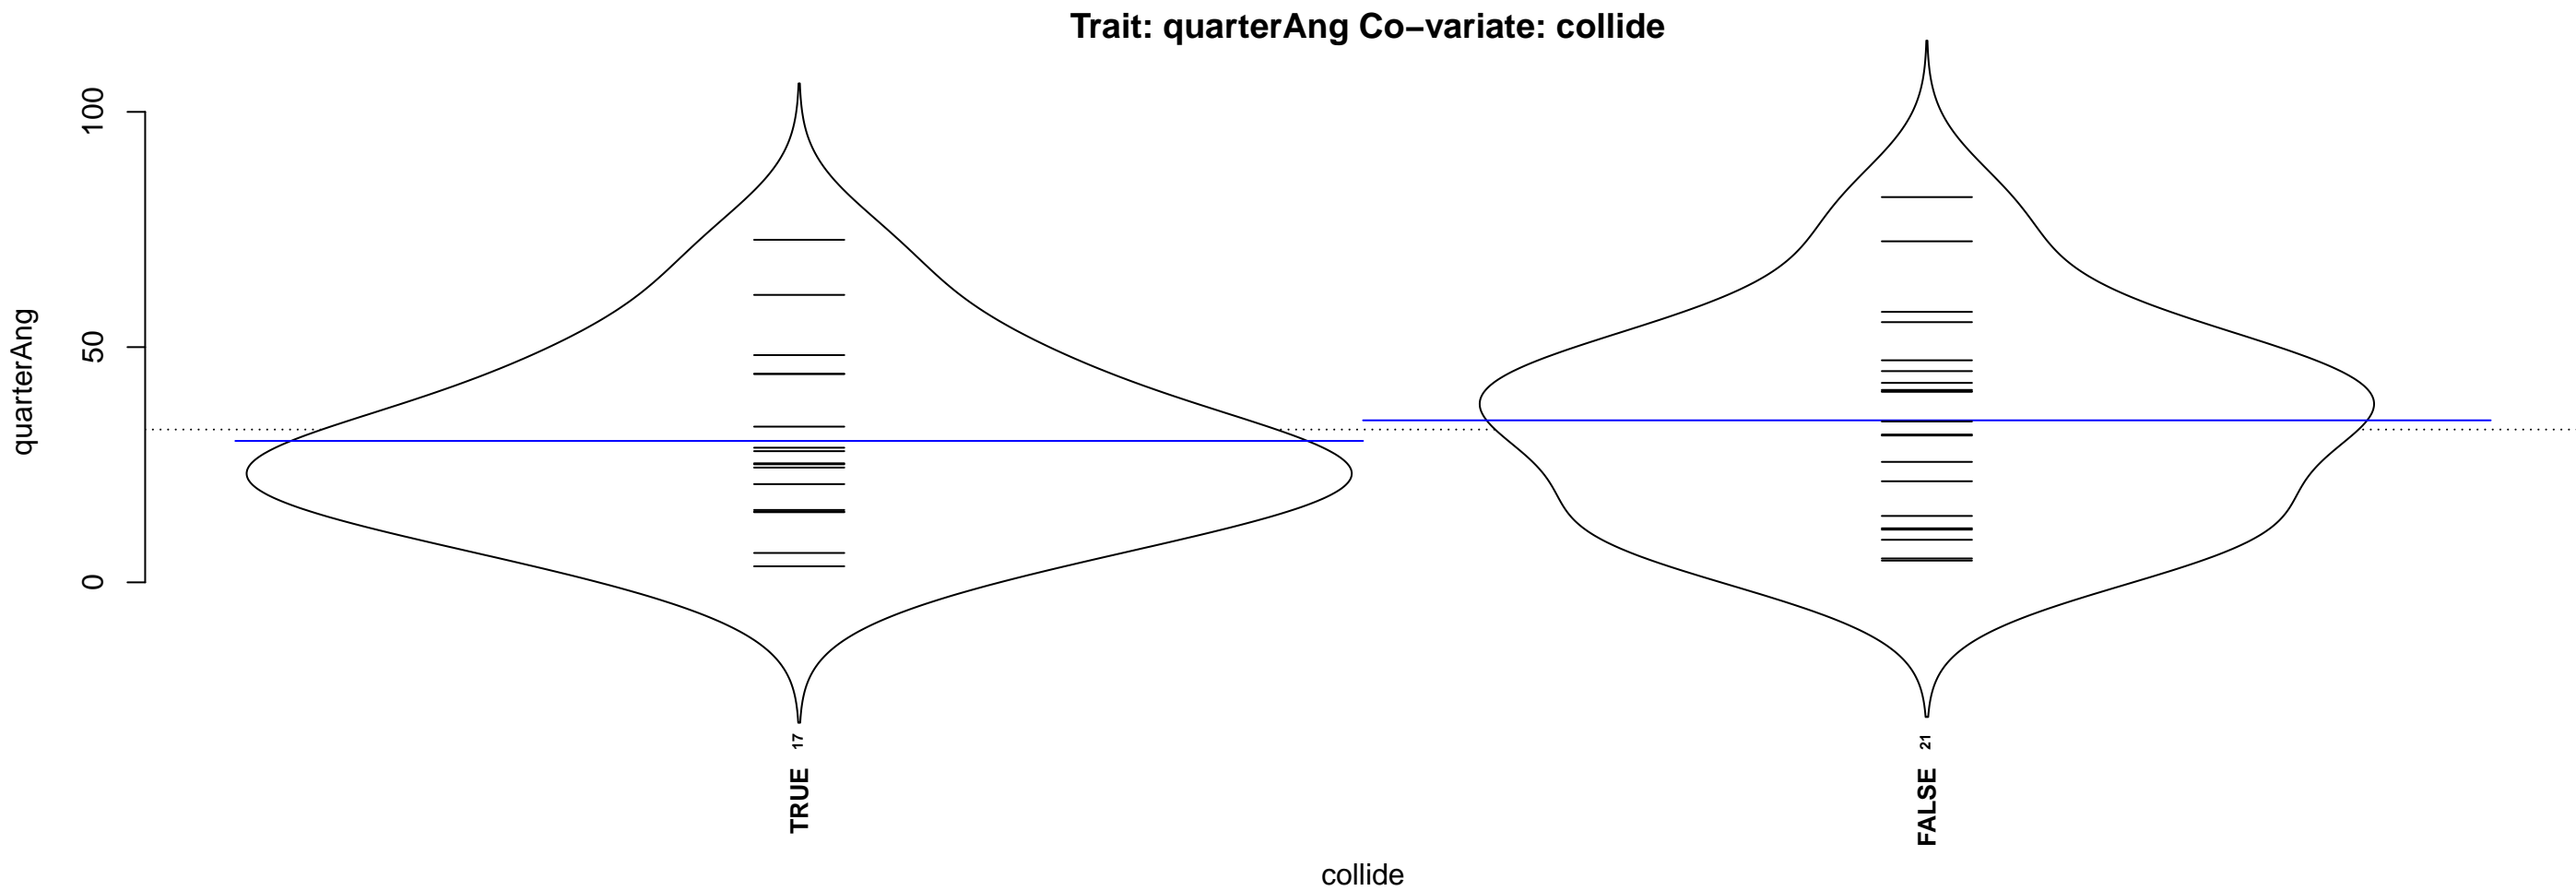

Trait: quarterAng Co-variate: along

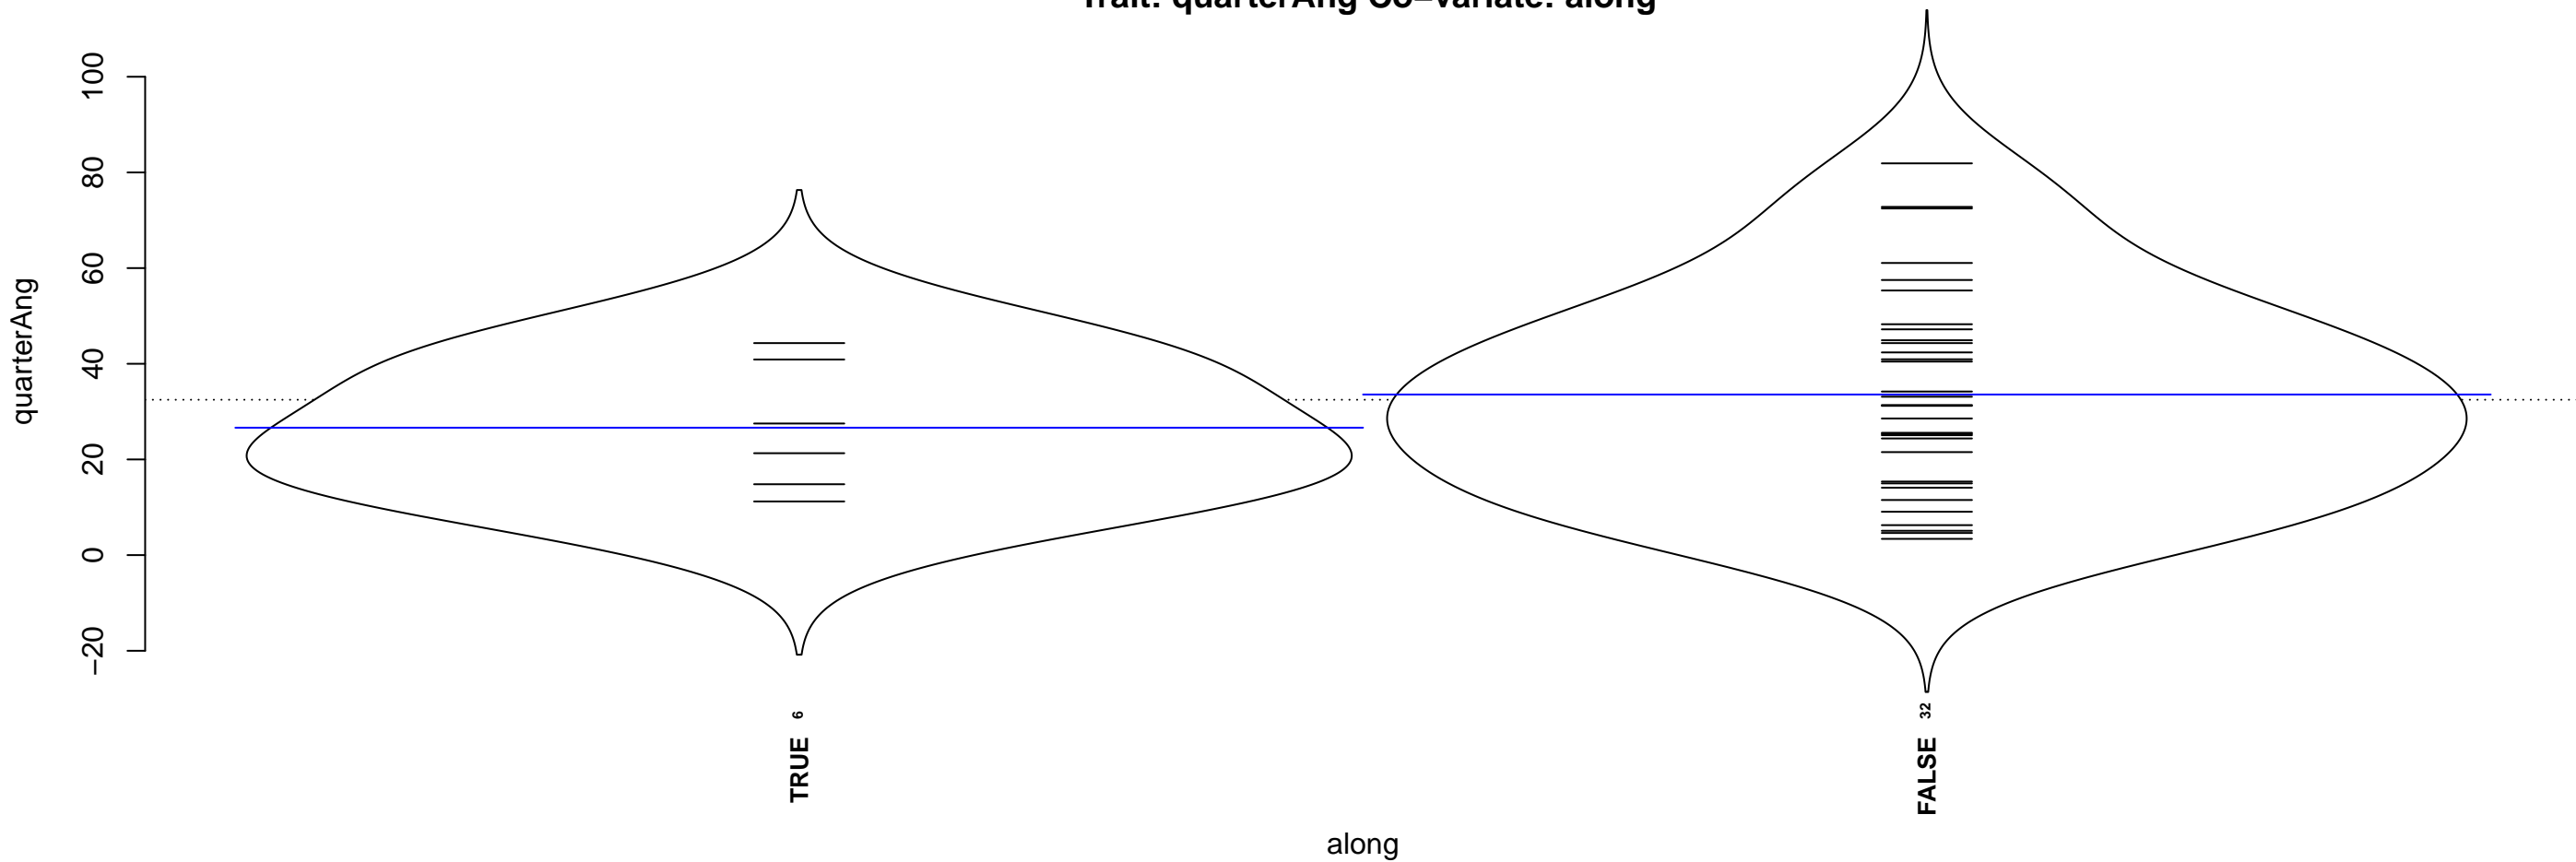

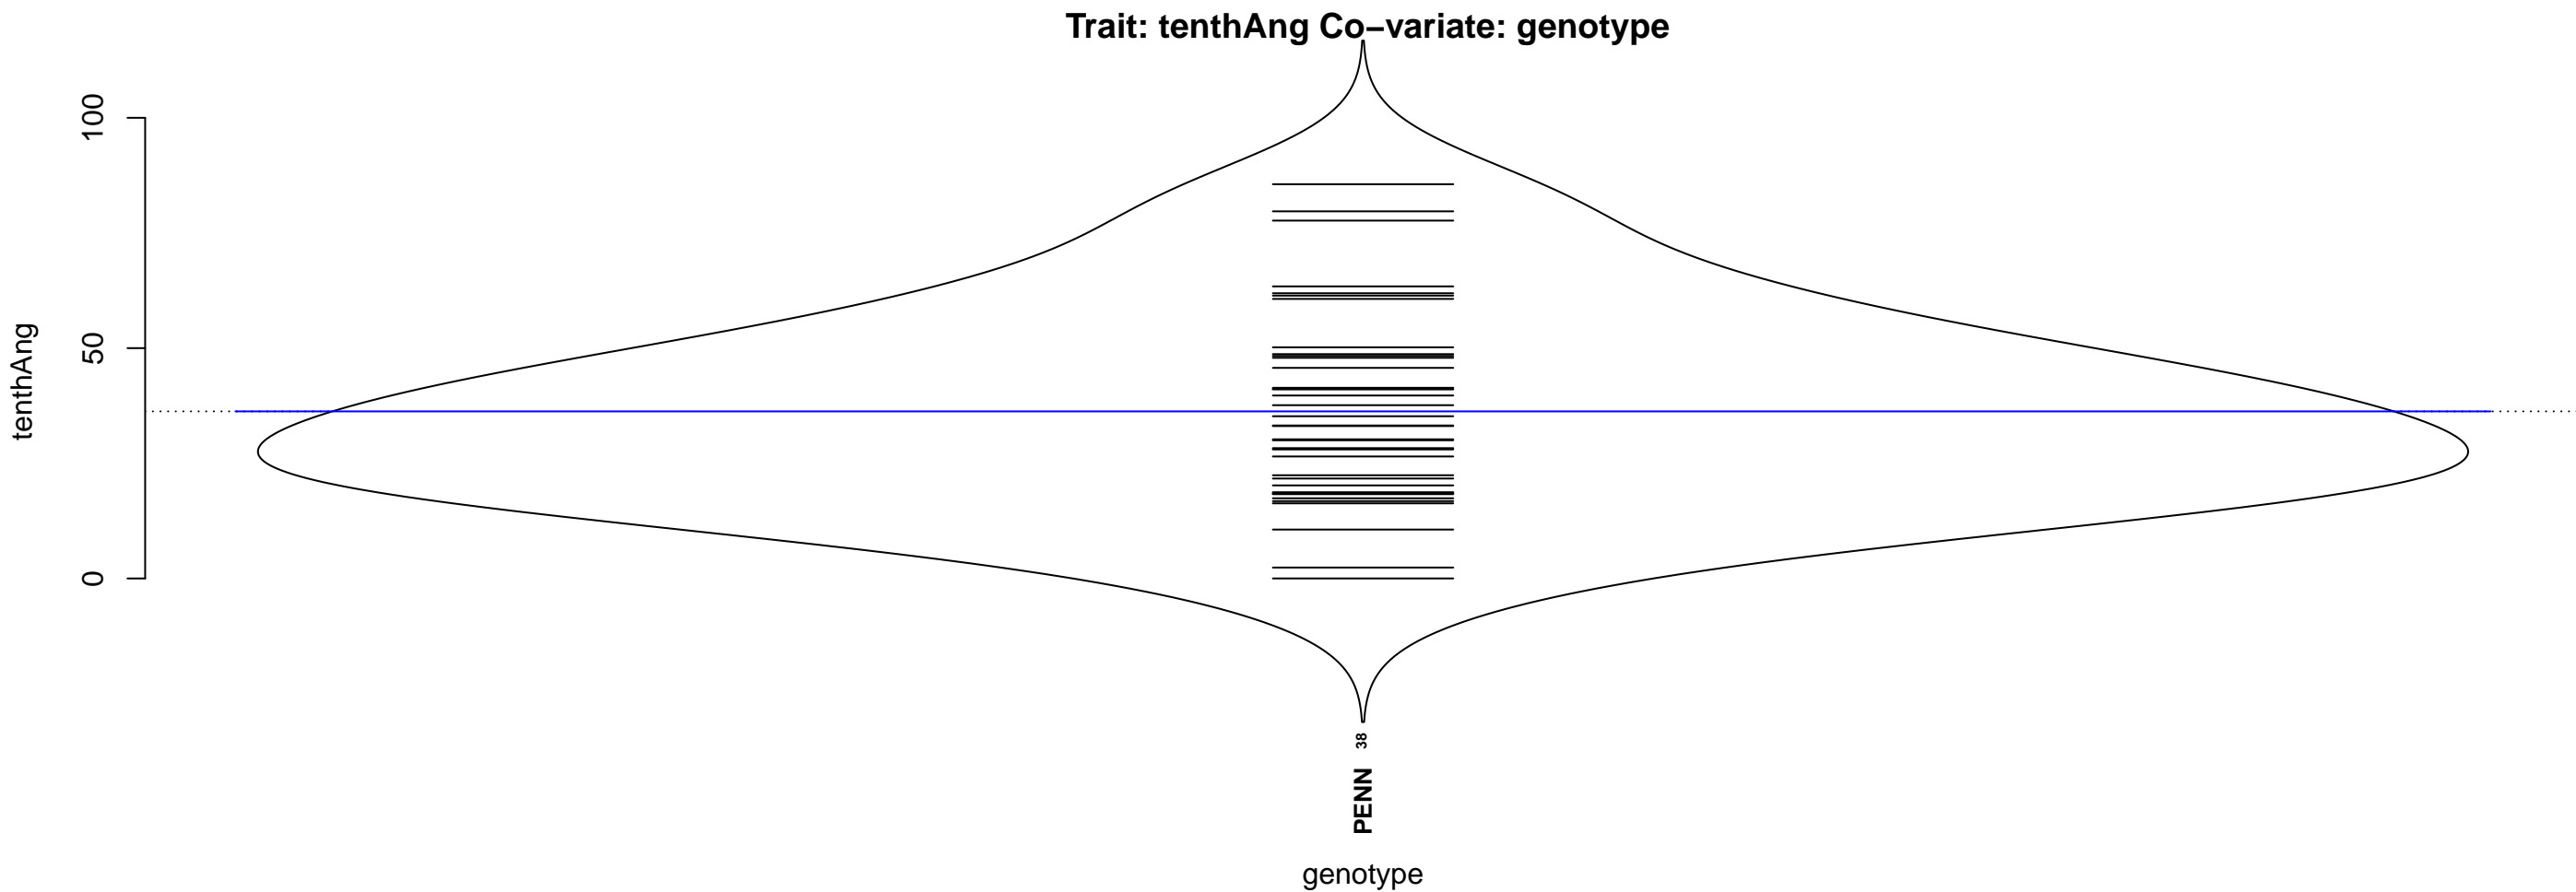

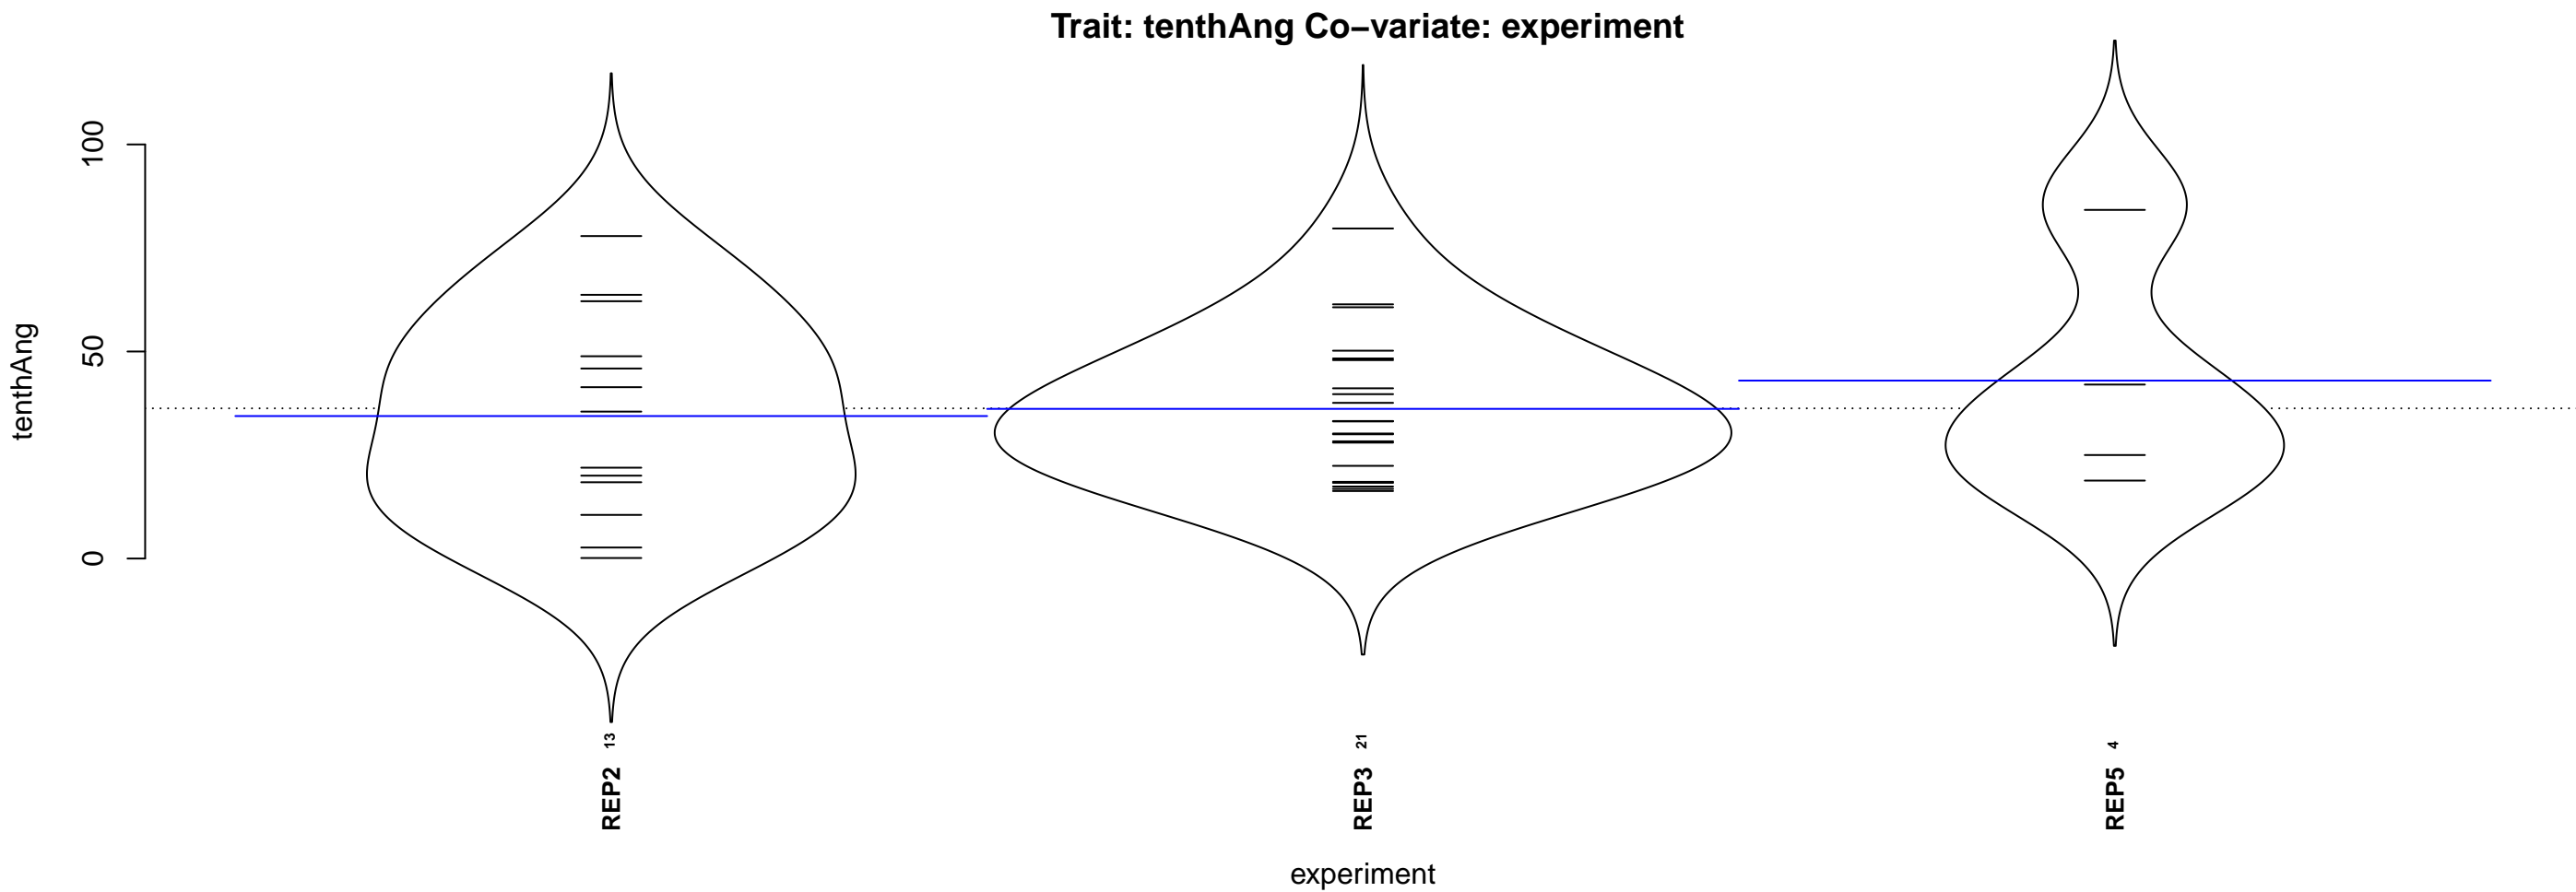

germAge

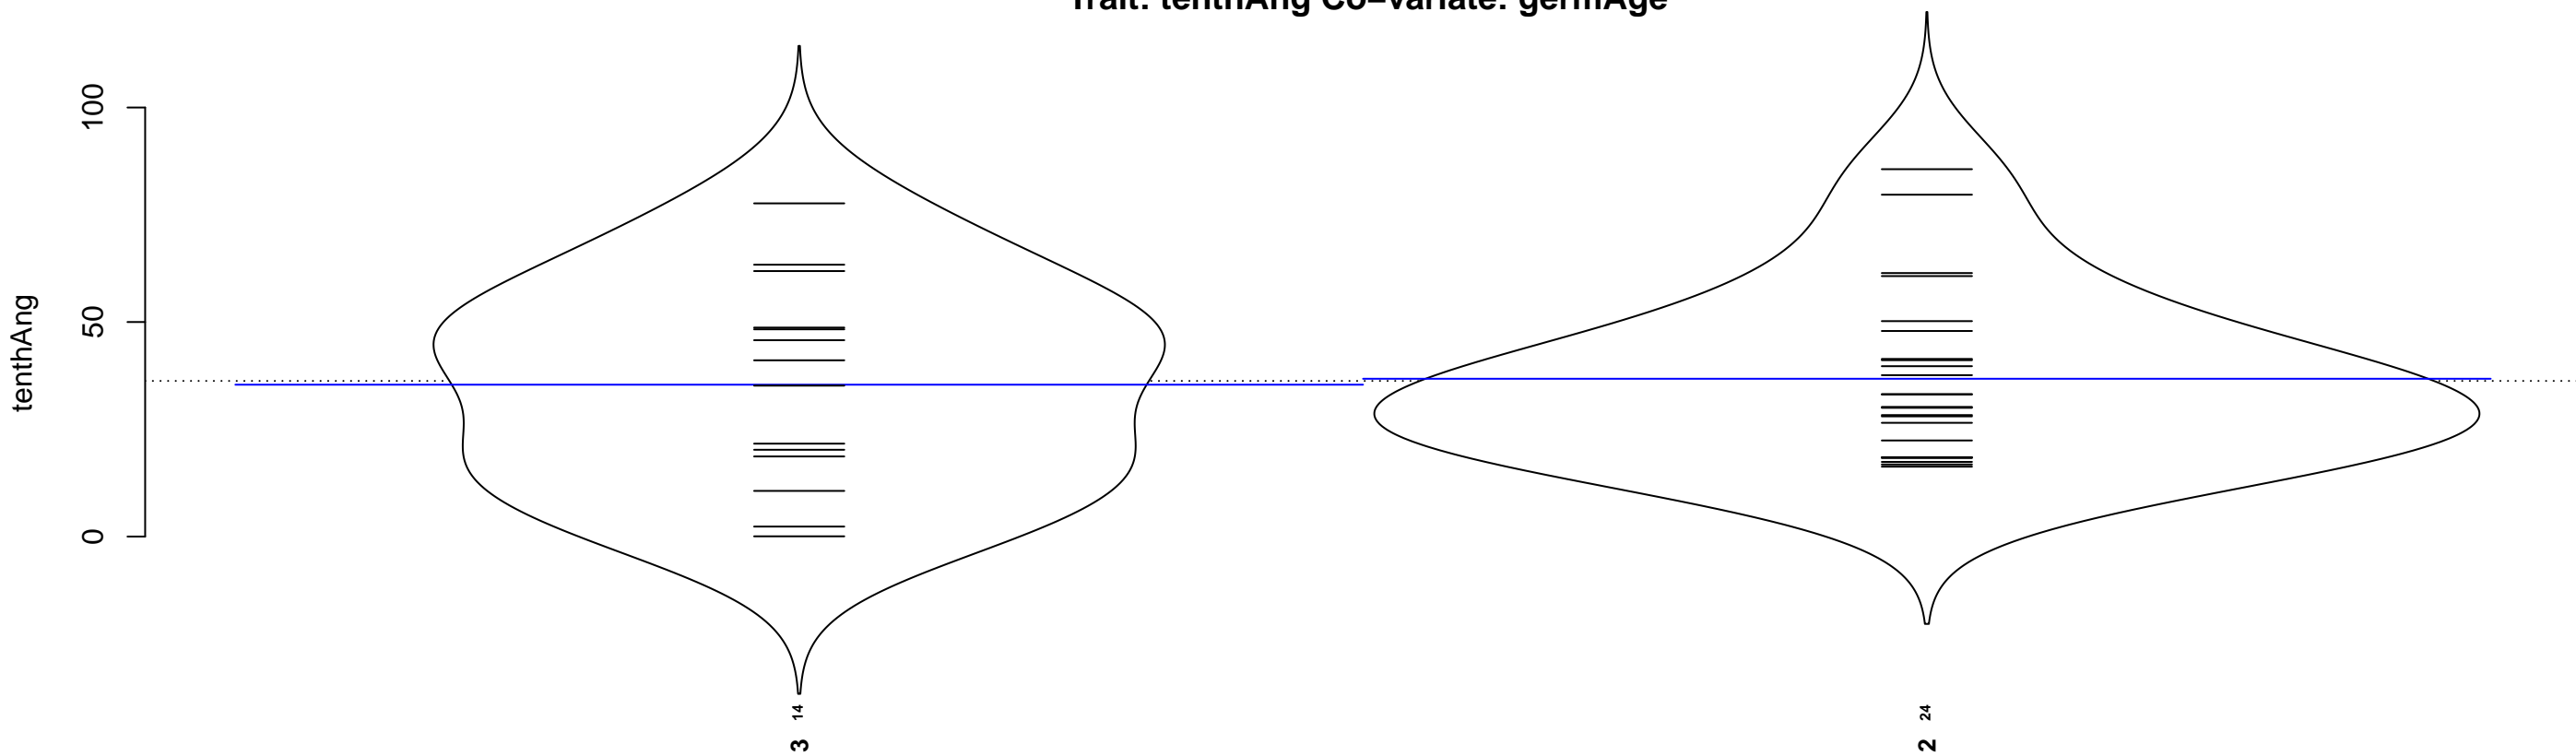

Trait: tenthAng Co-variate: rootAge

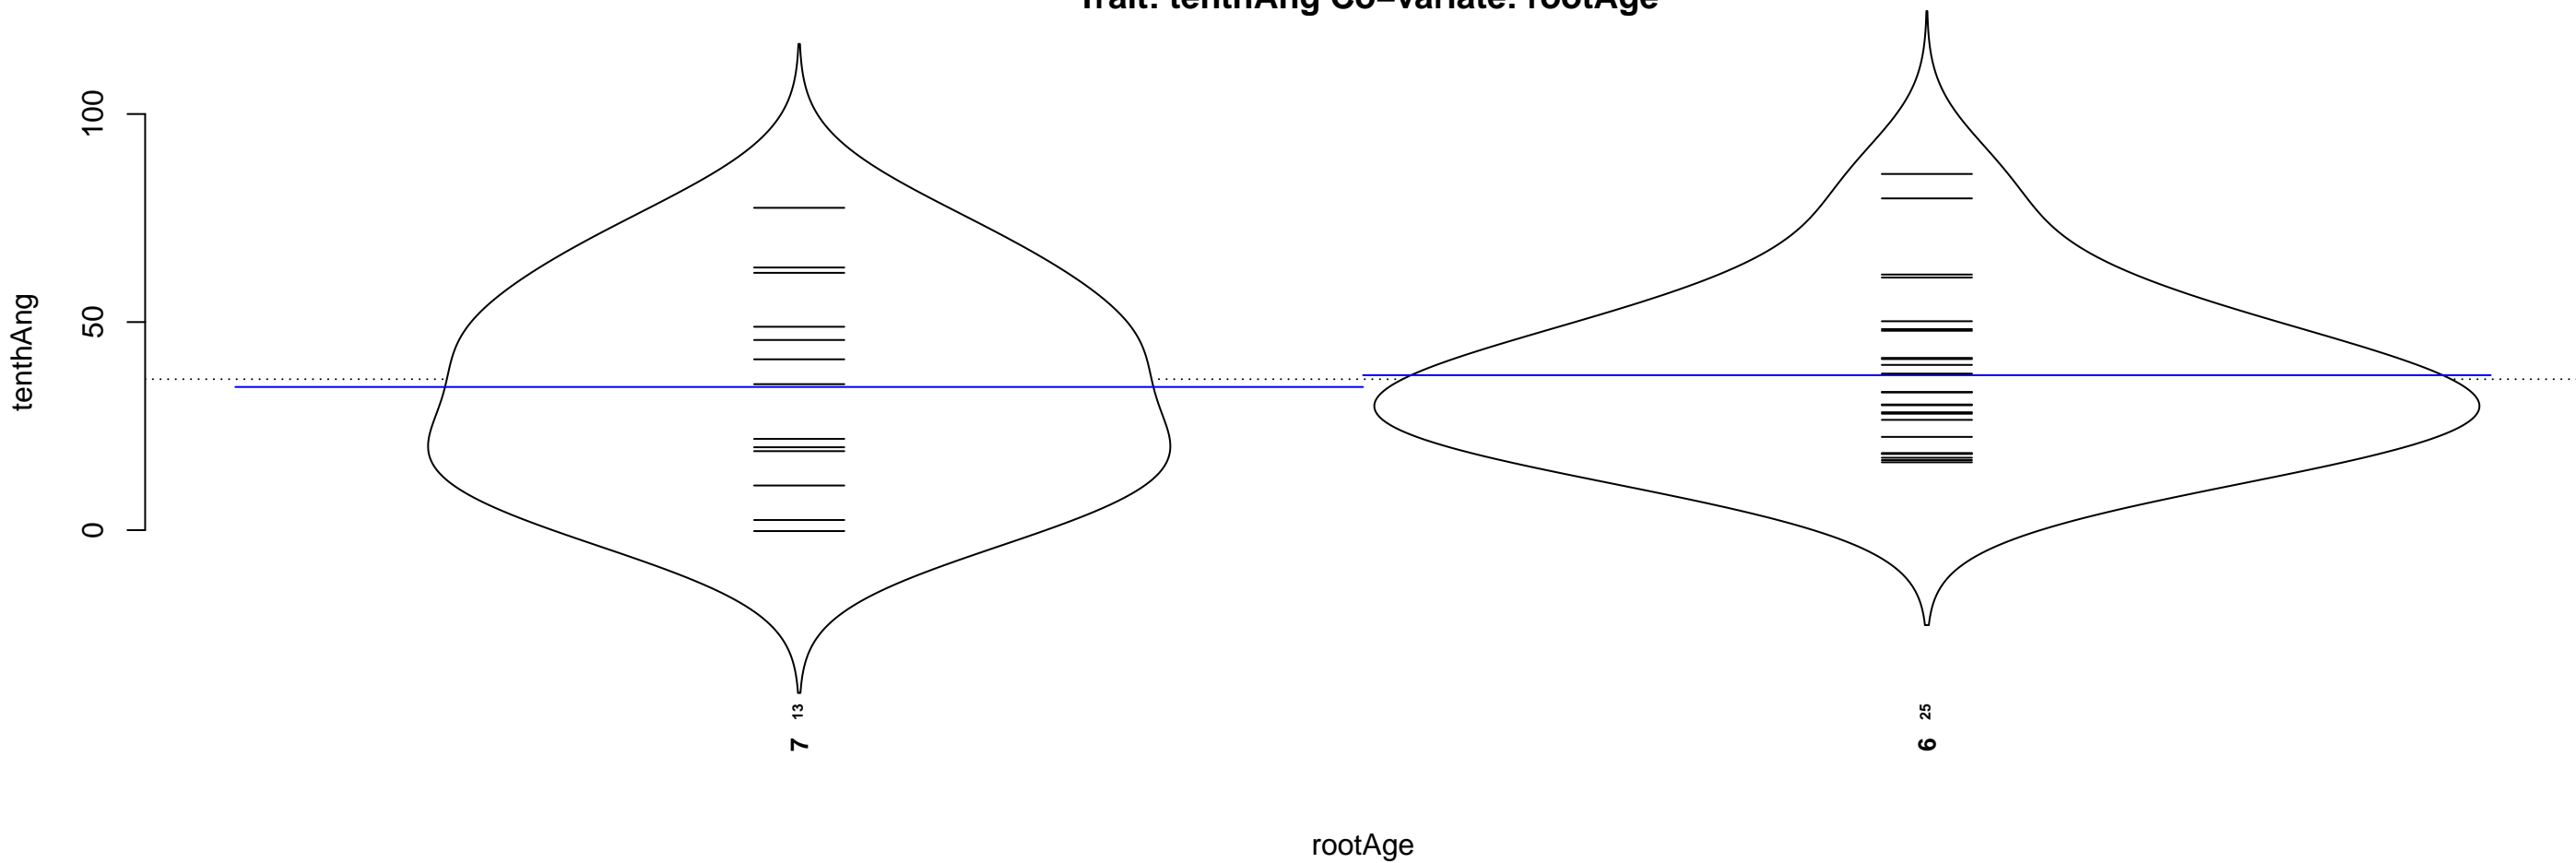

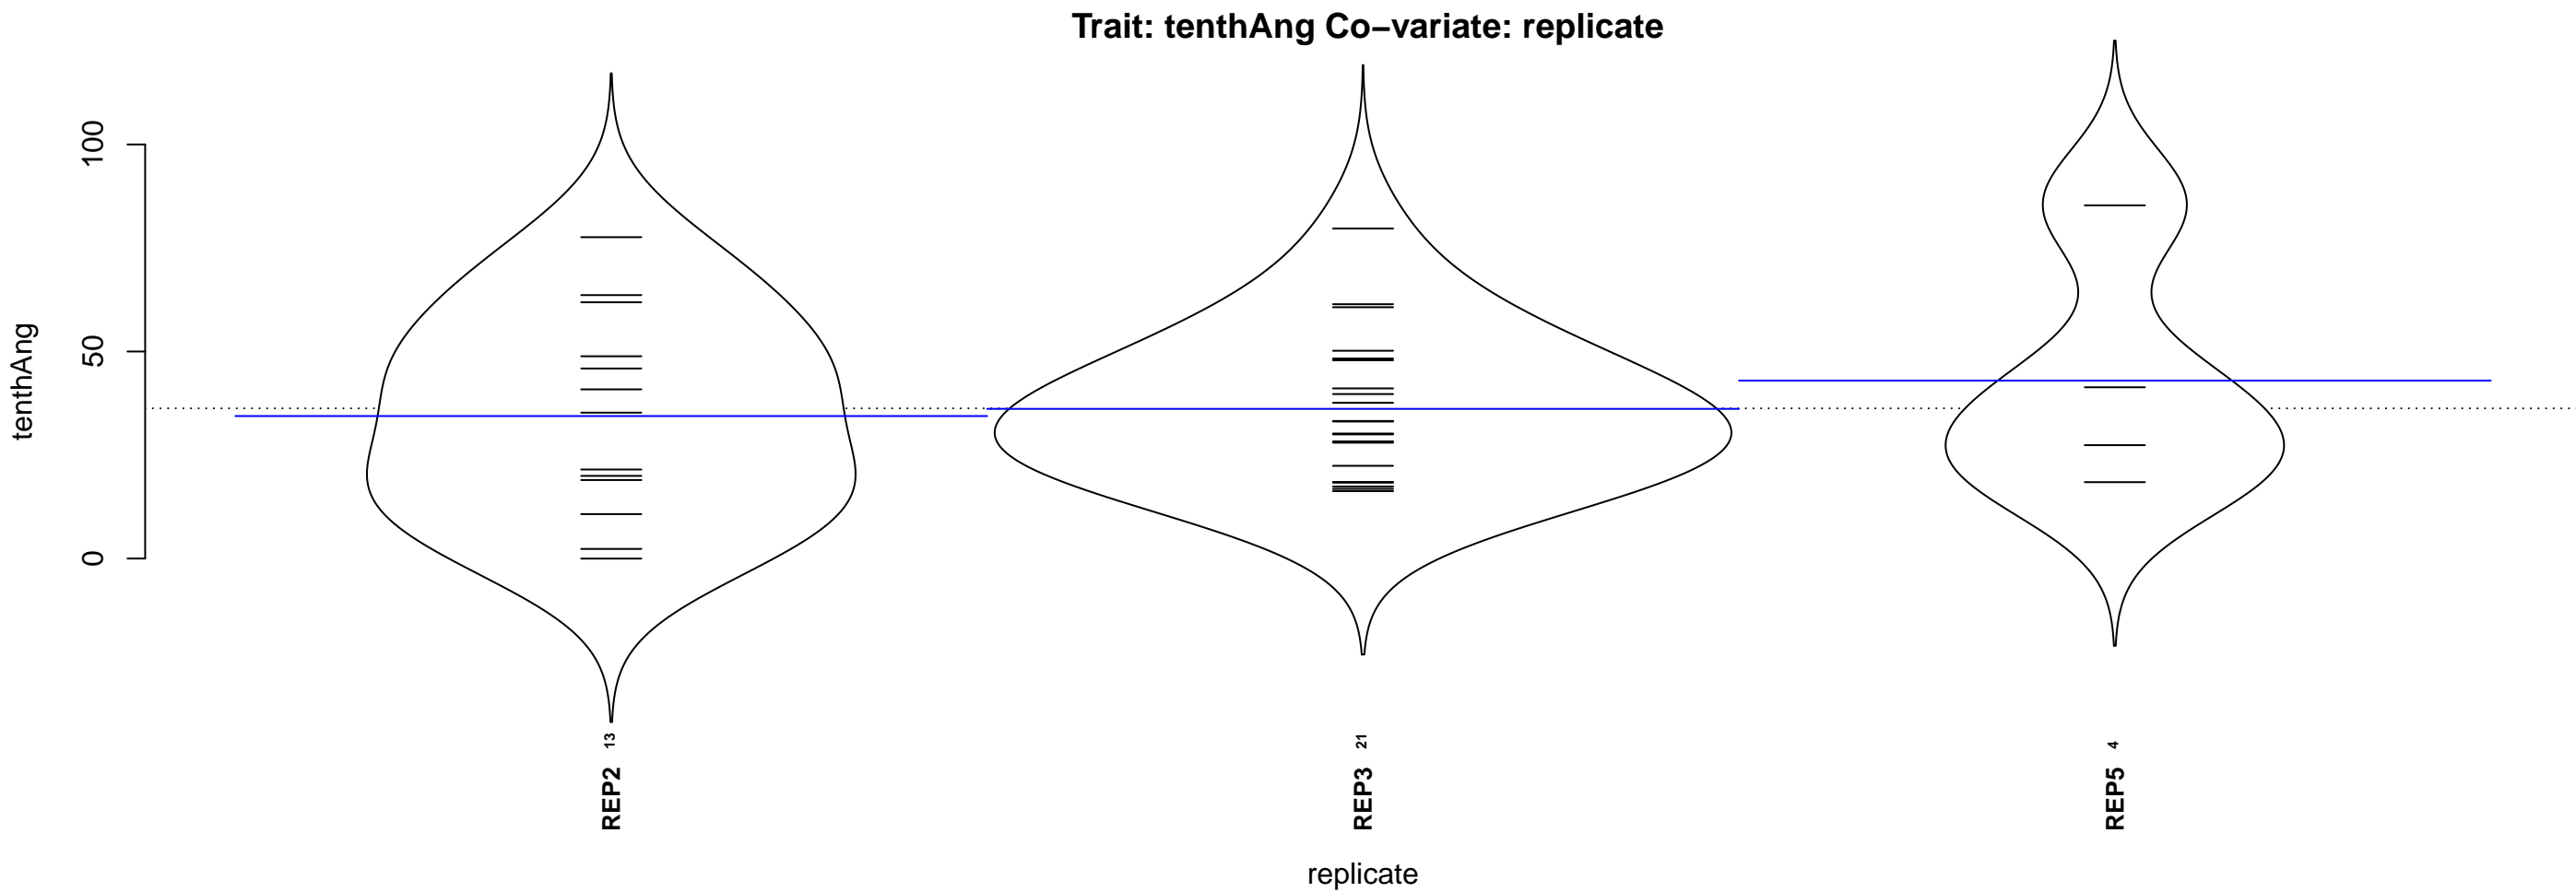



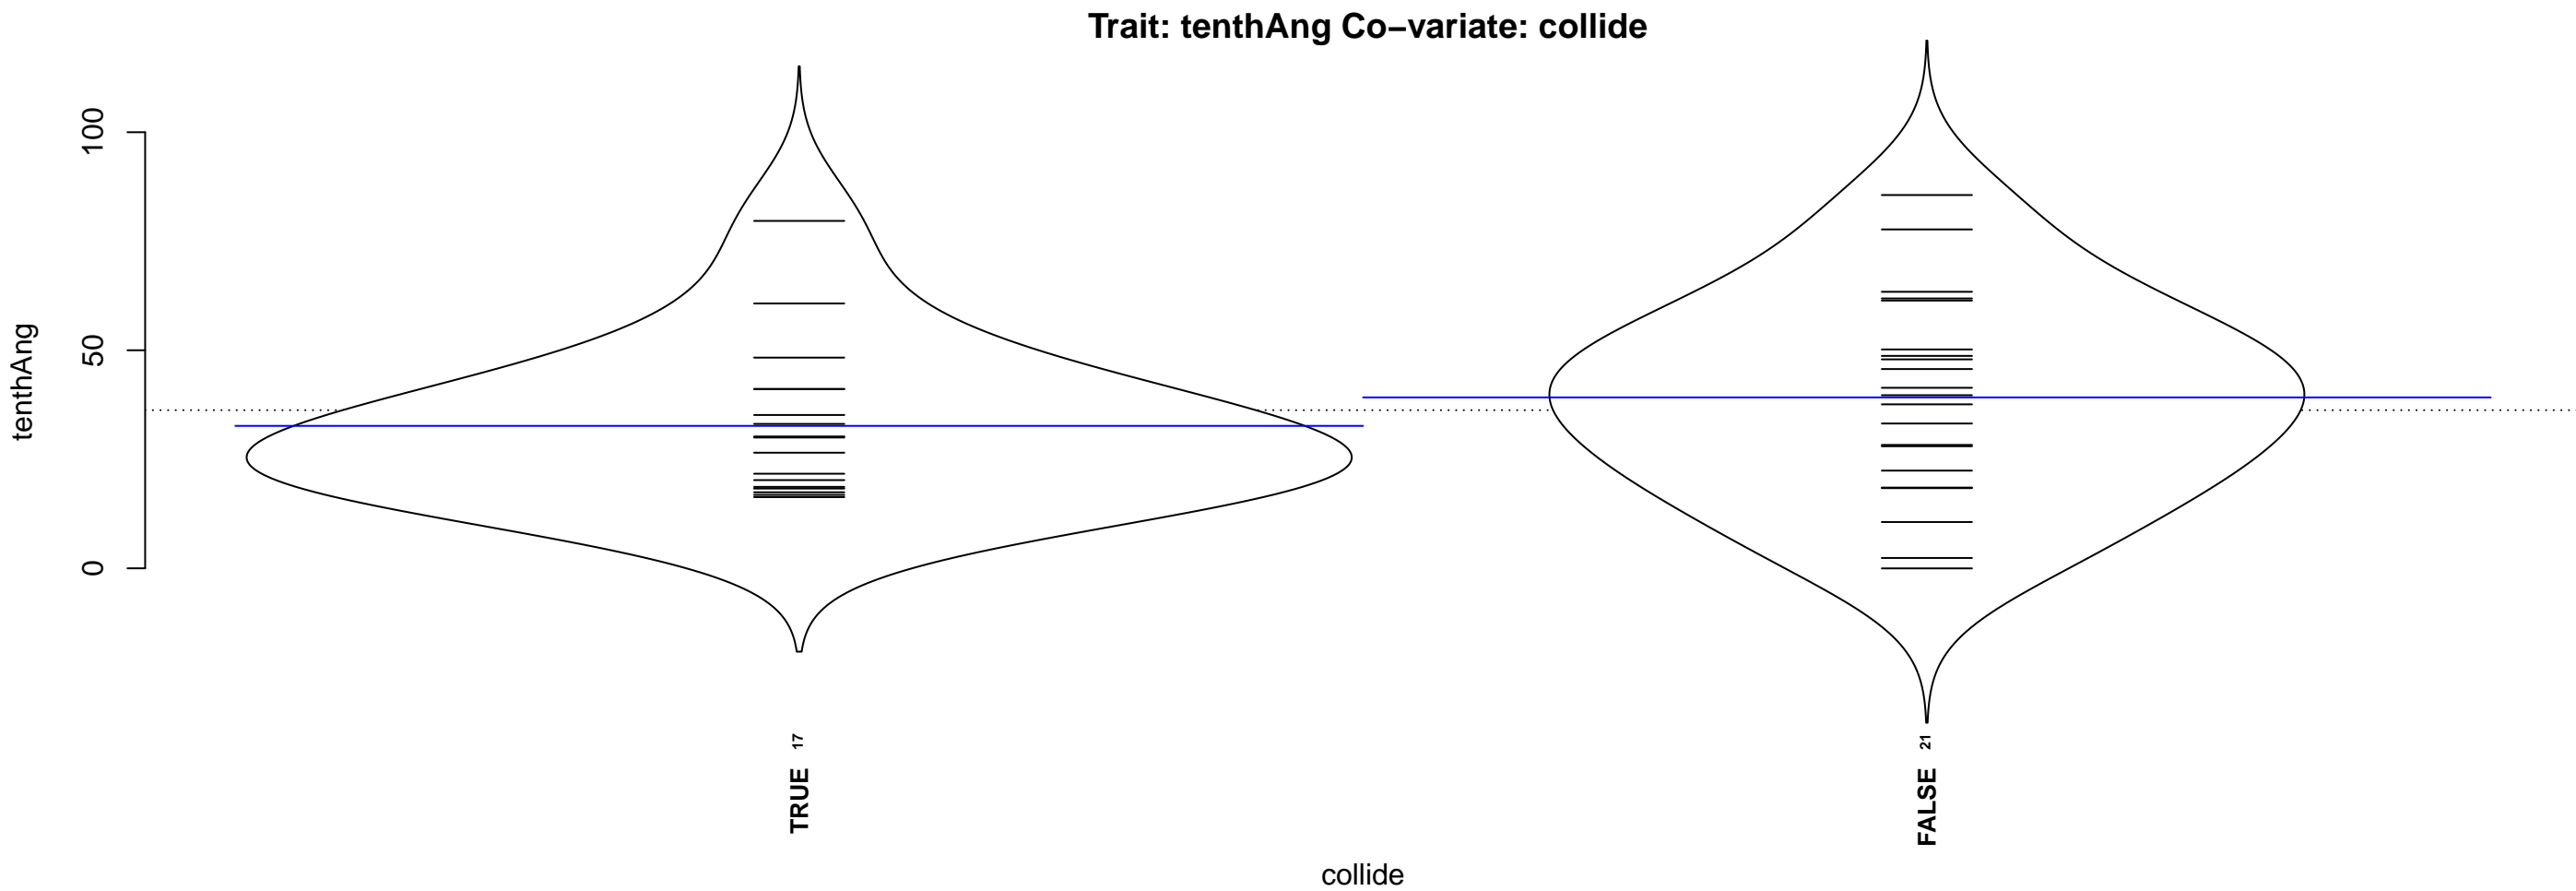

Trait: tenthAng Co-variate: along

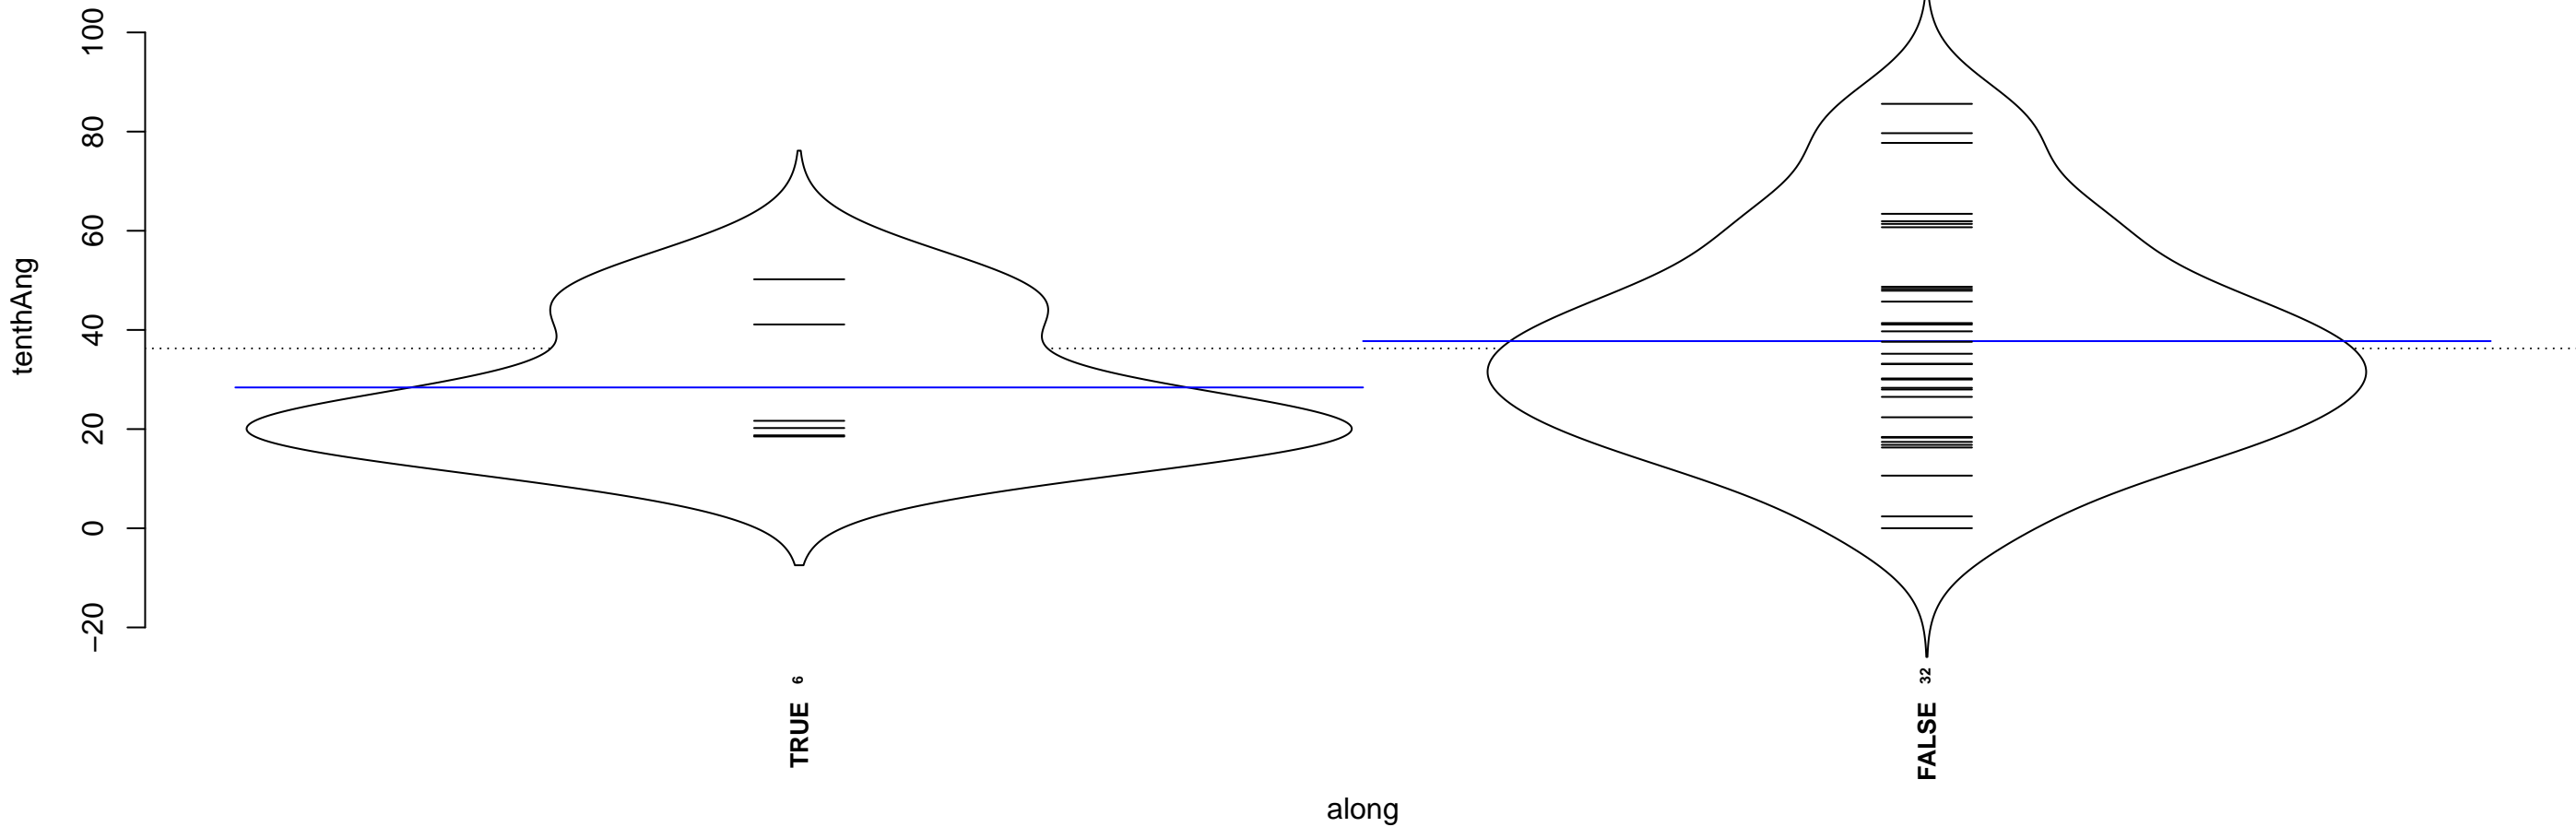

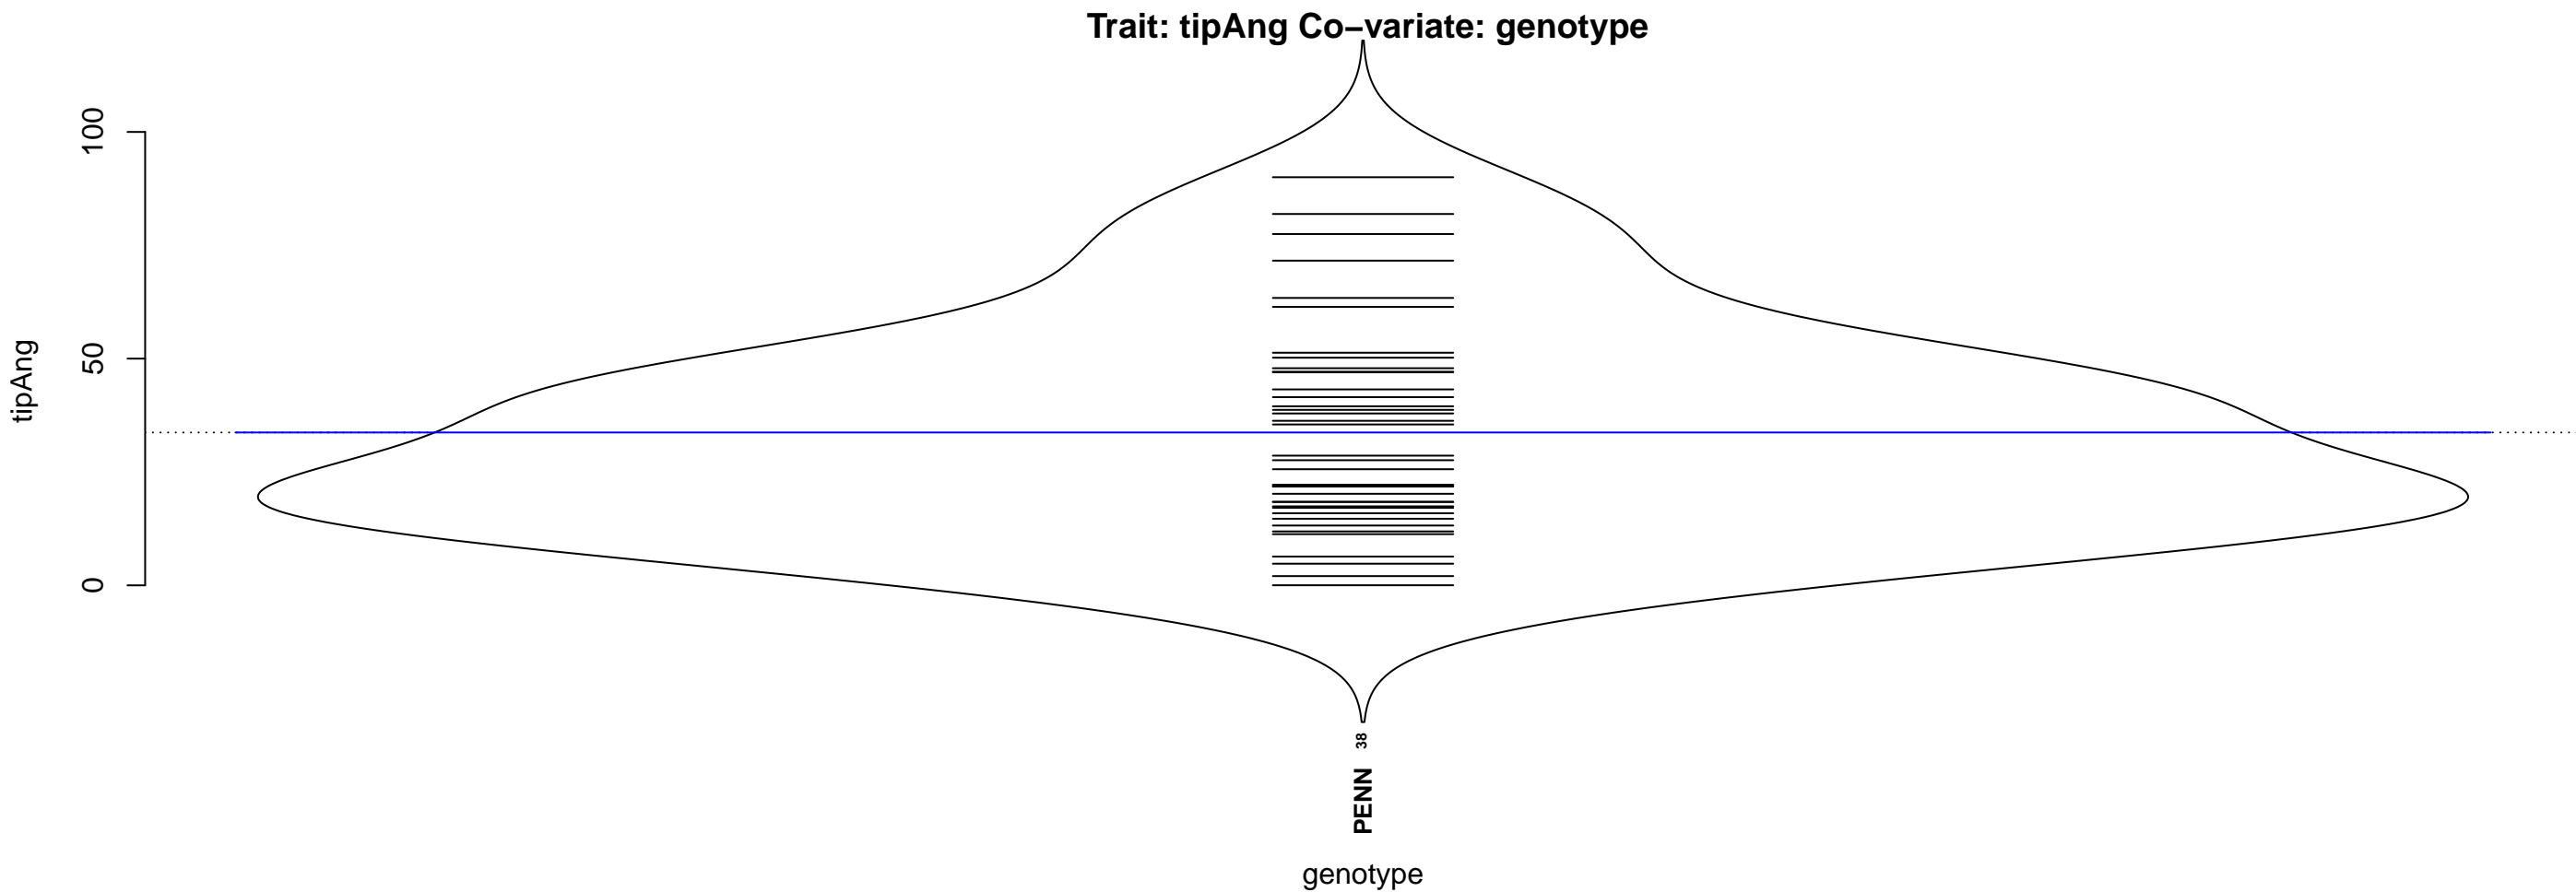

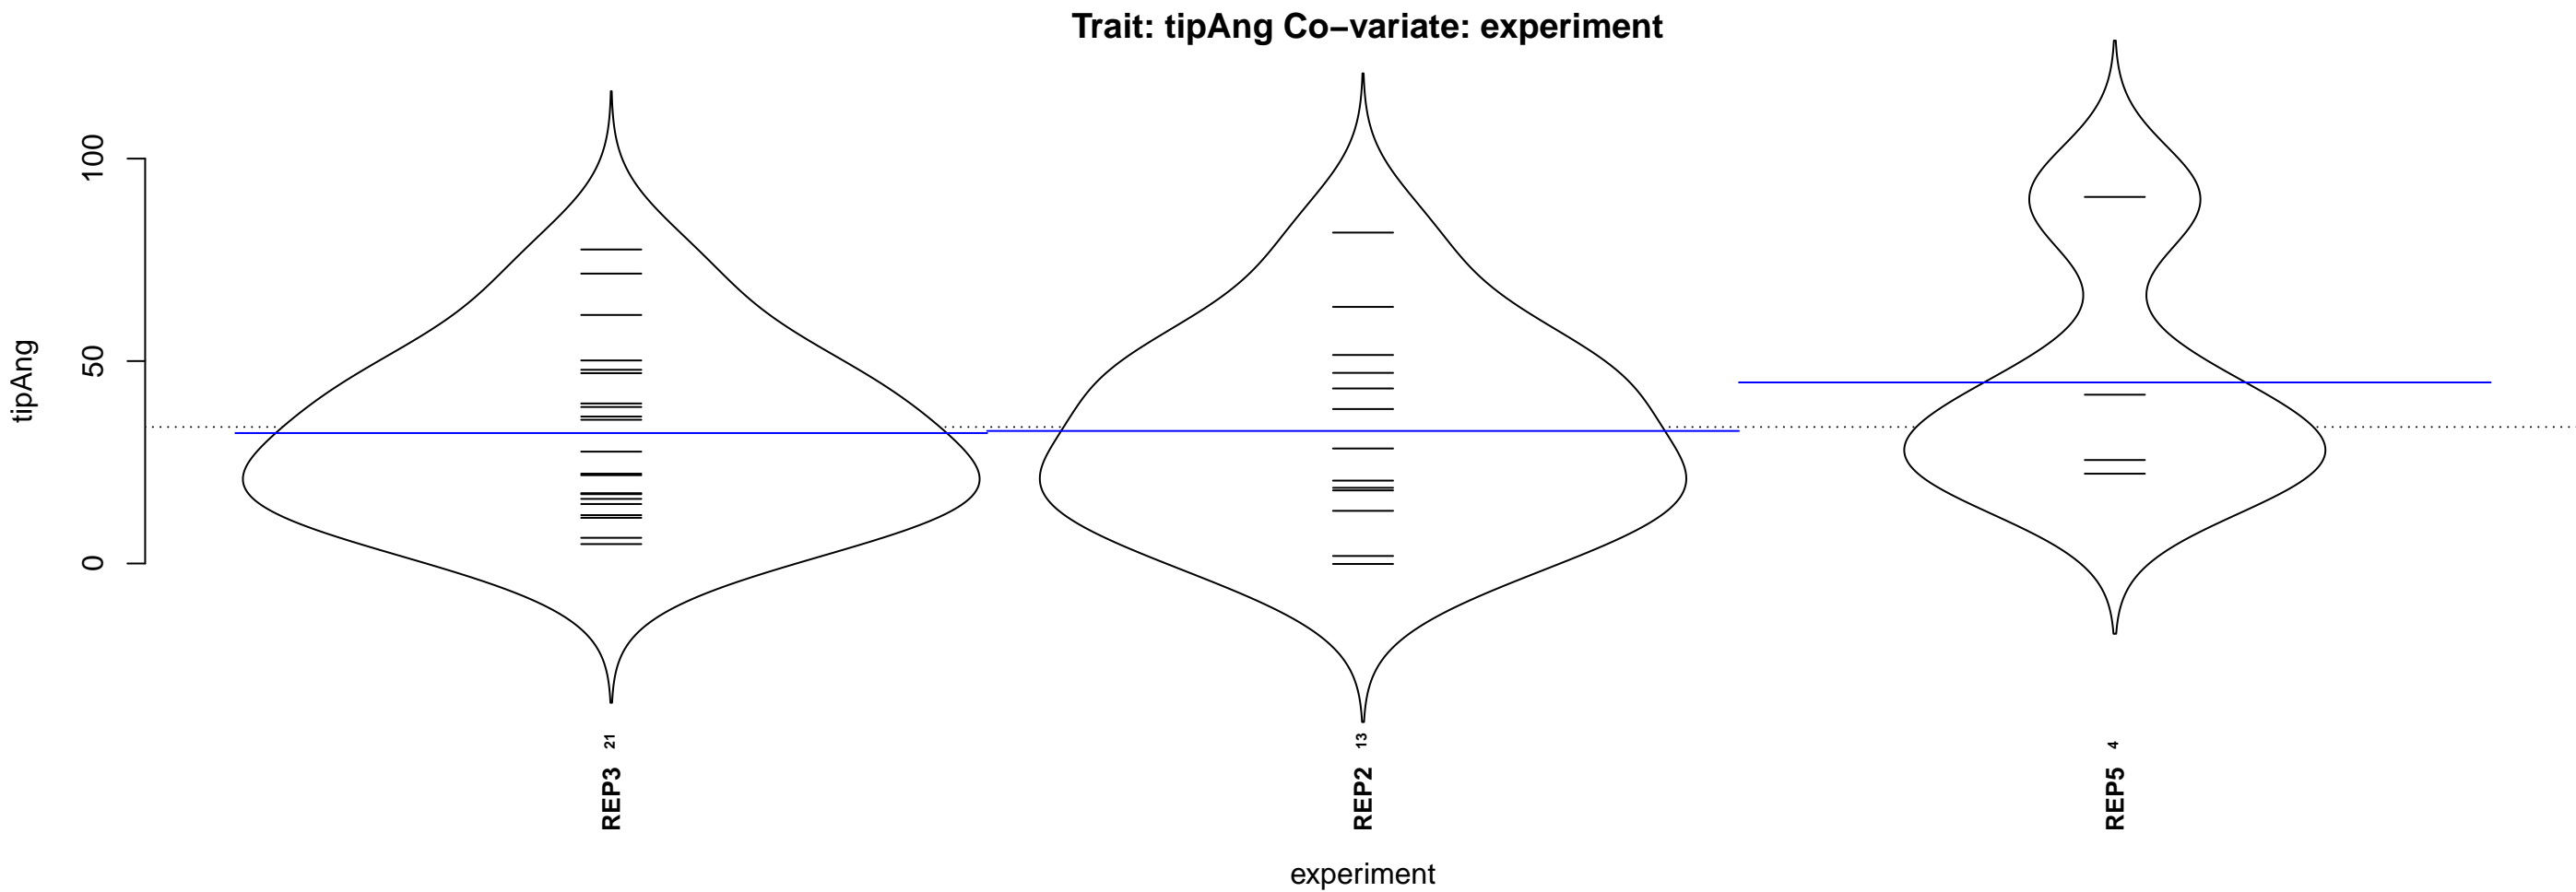

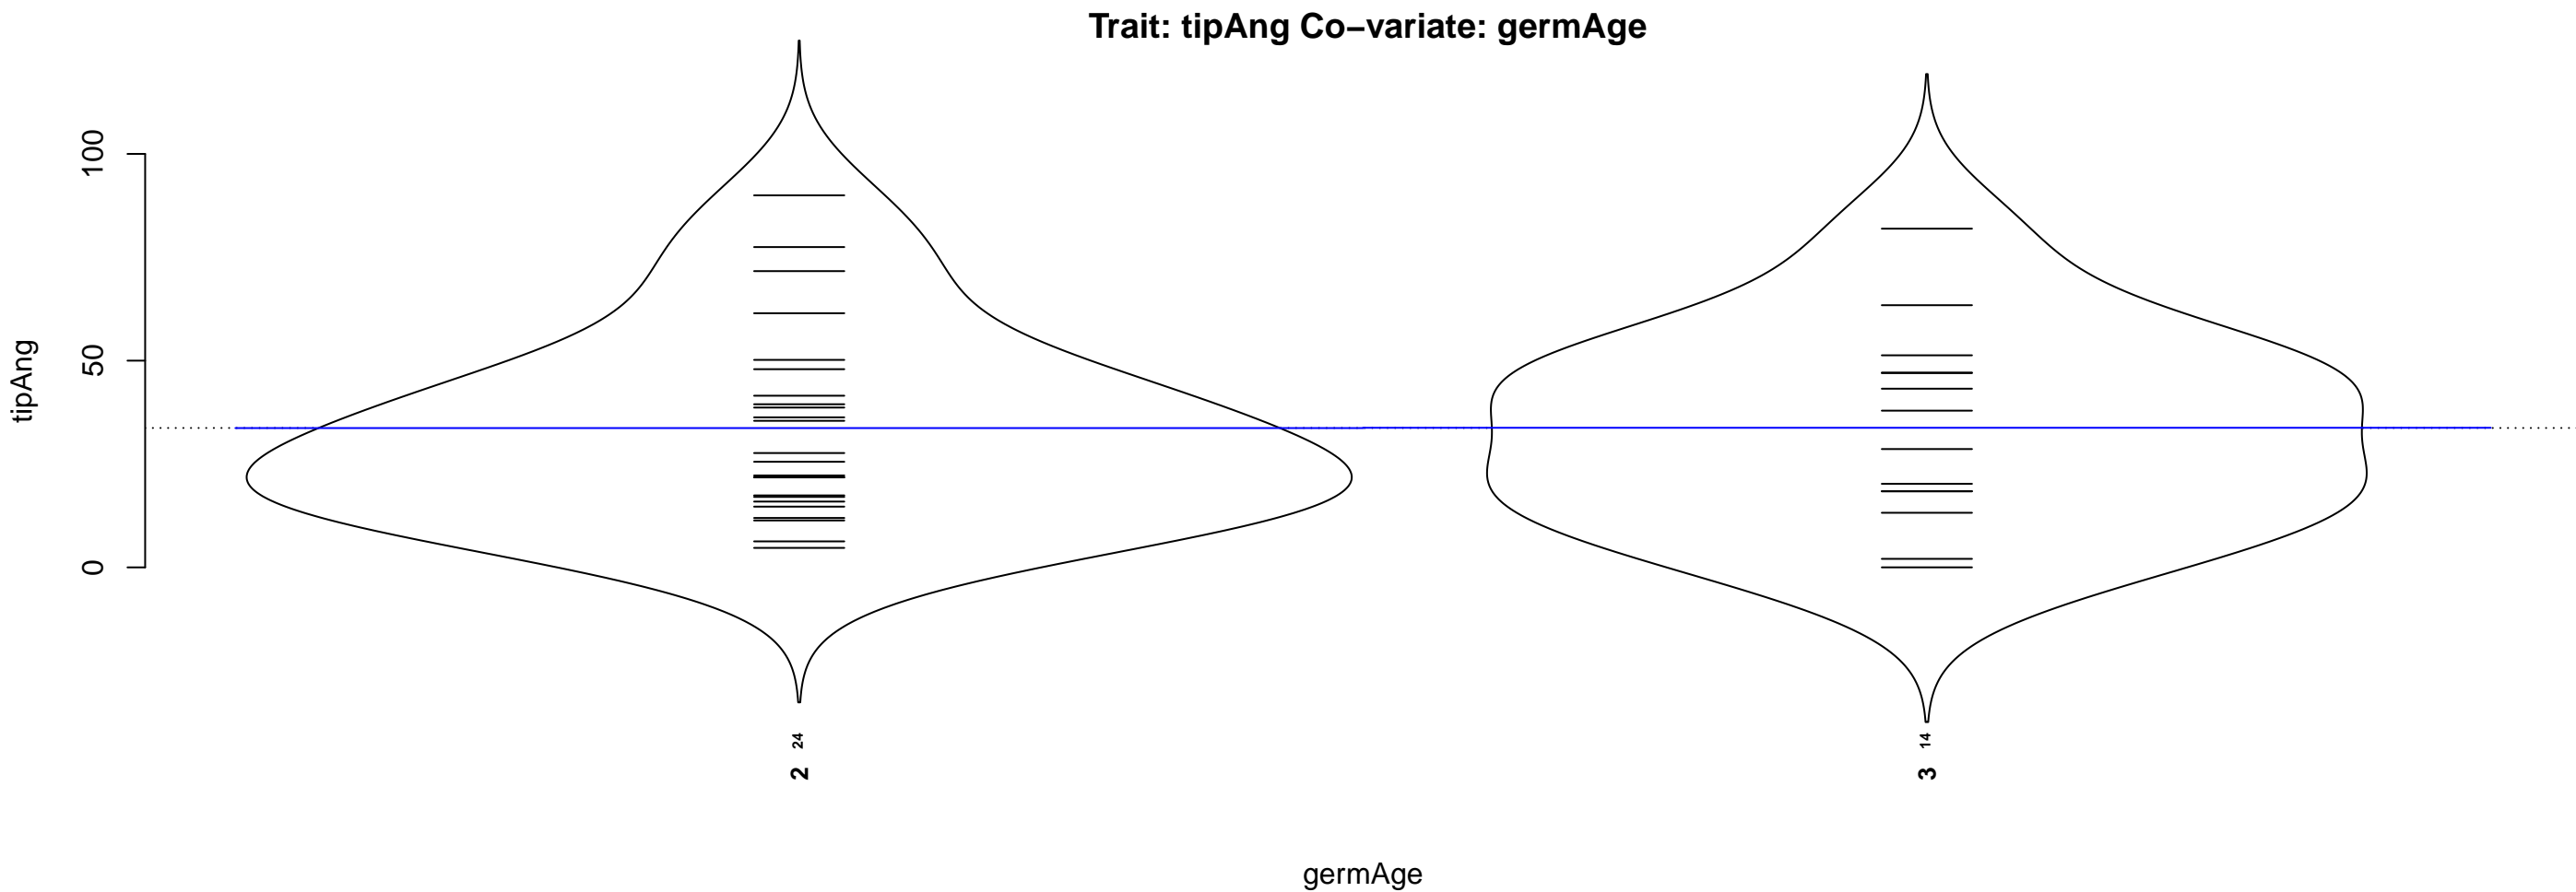

Trait: tipAng Co-variate: rootAge

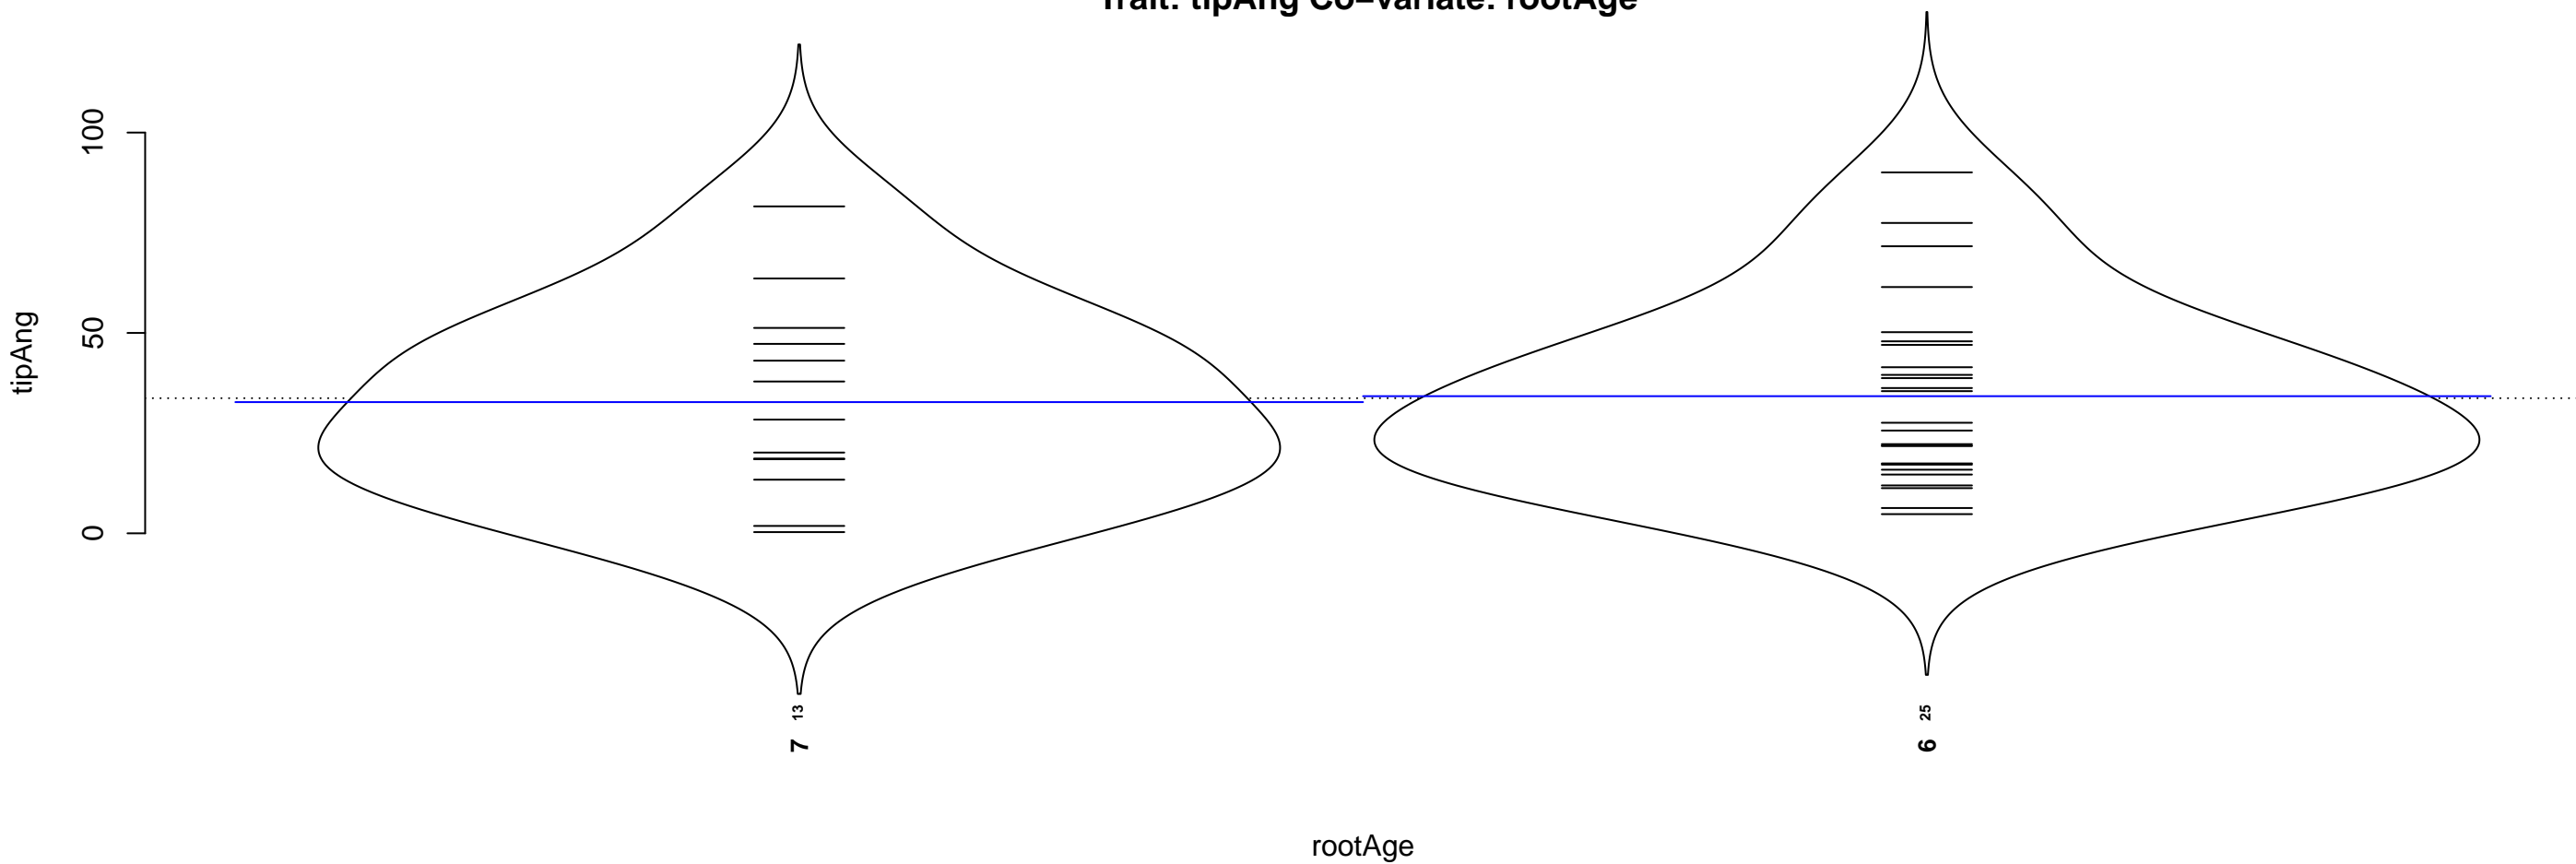

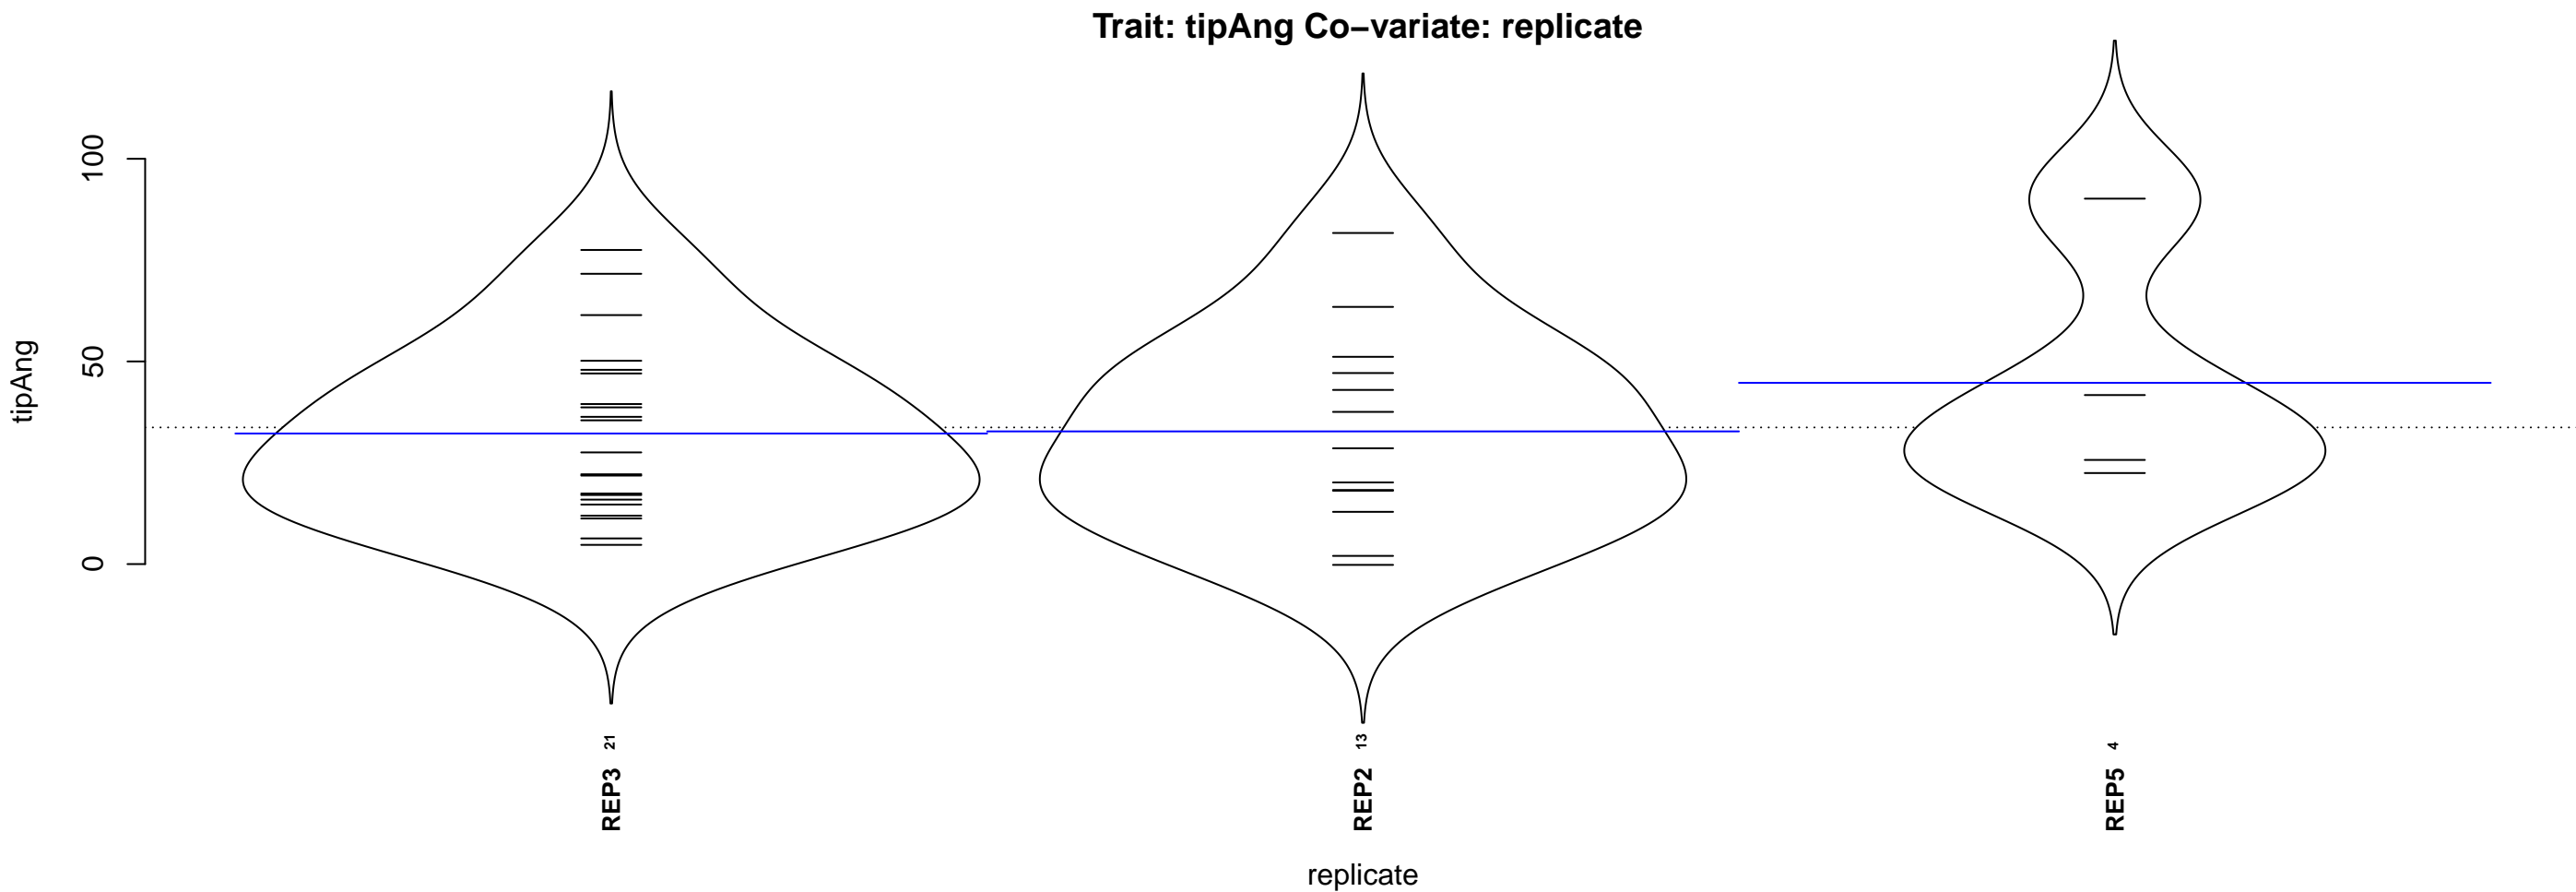

Trait: tipAng Co-variate: collide

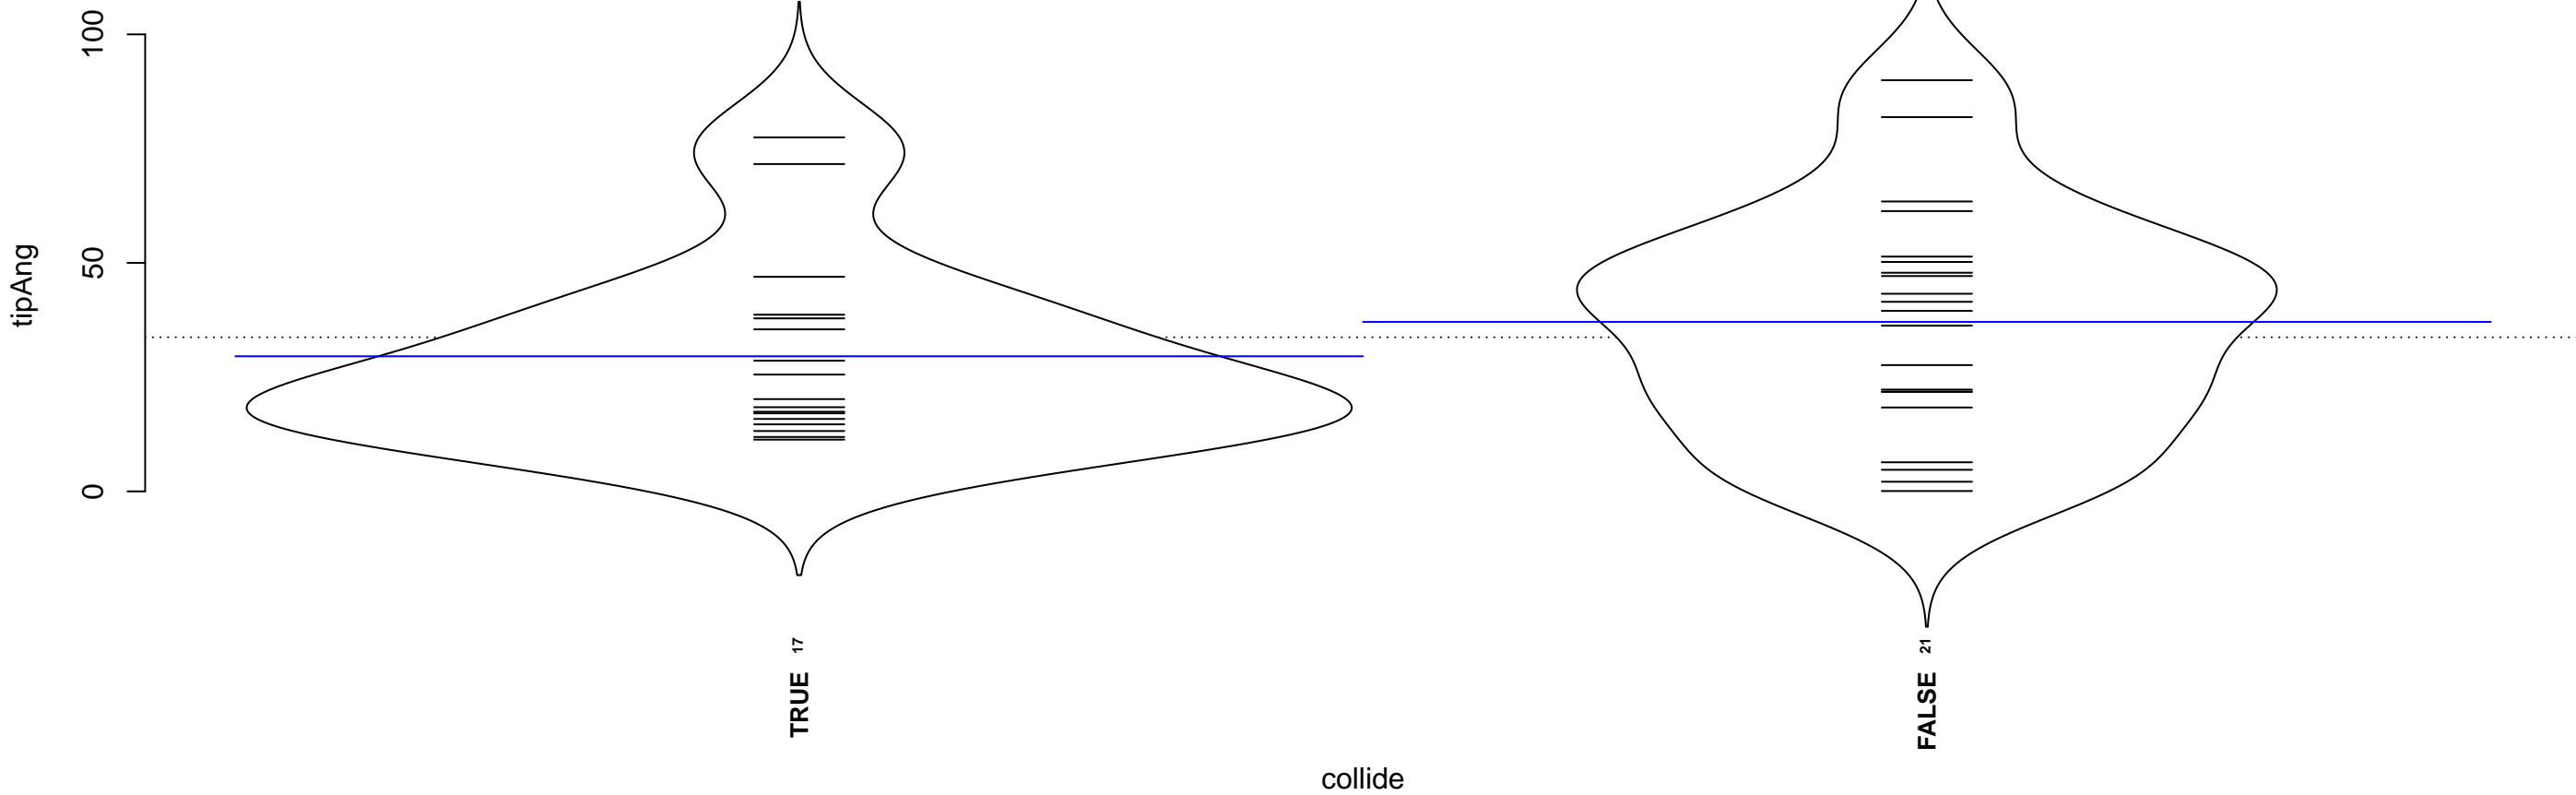



Trait: tipAng Co-variate: along

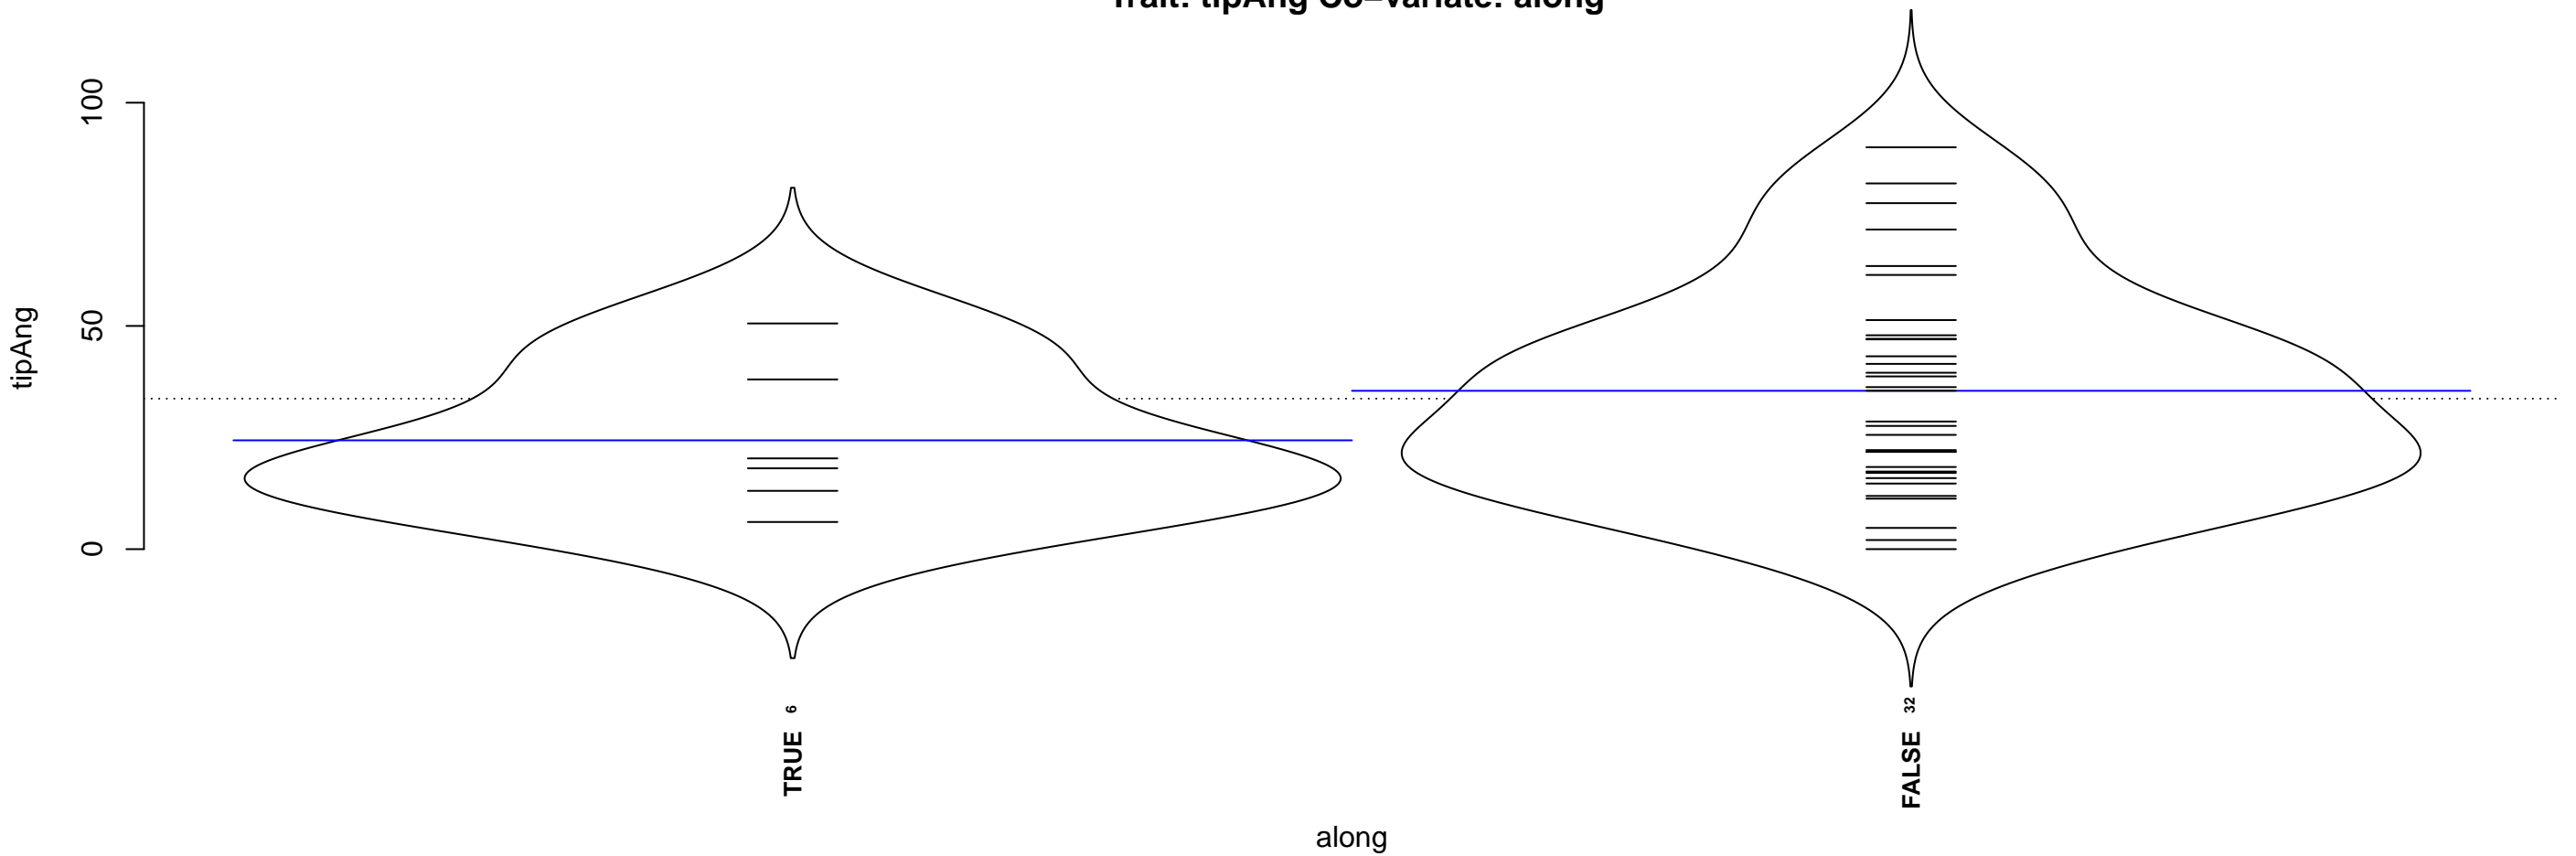

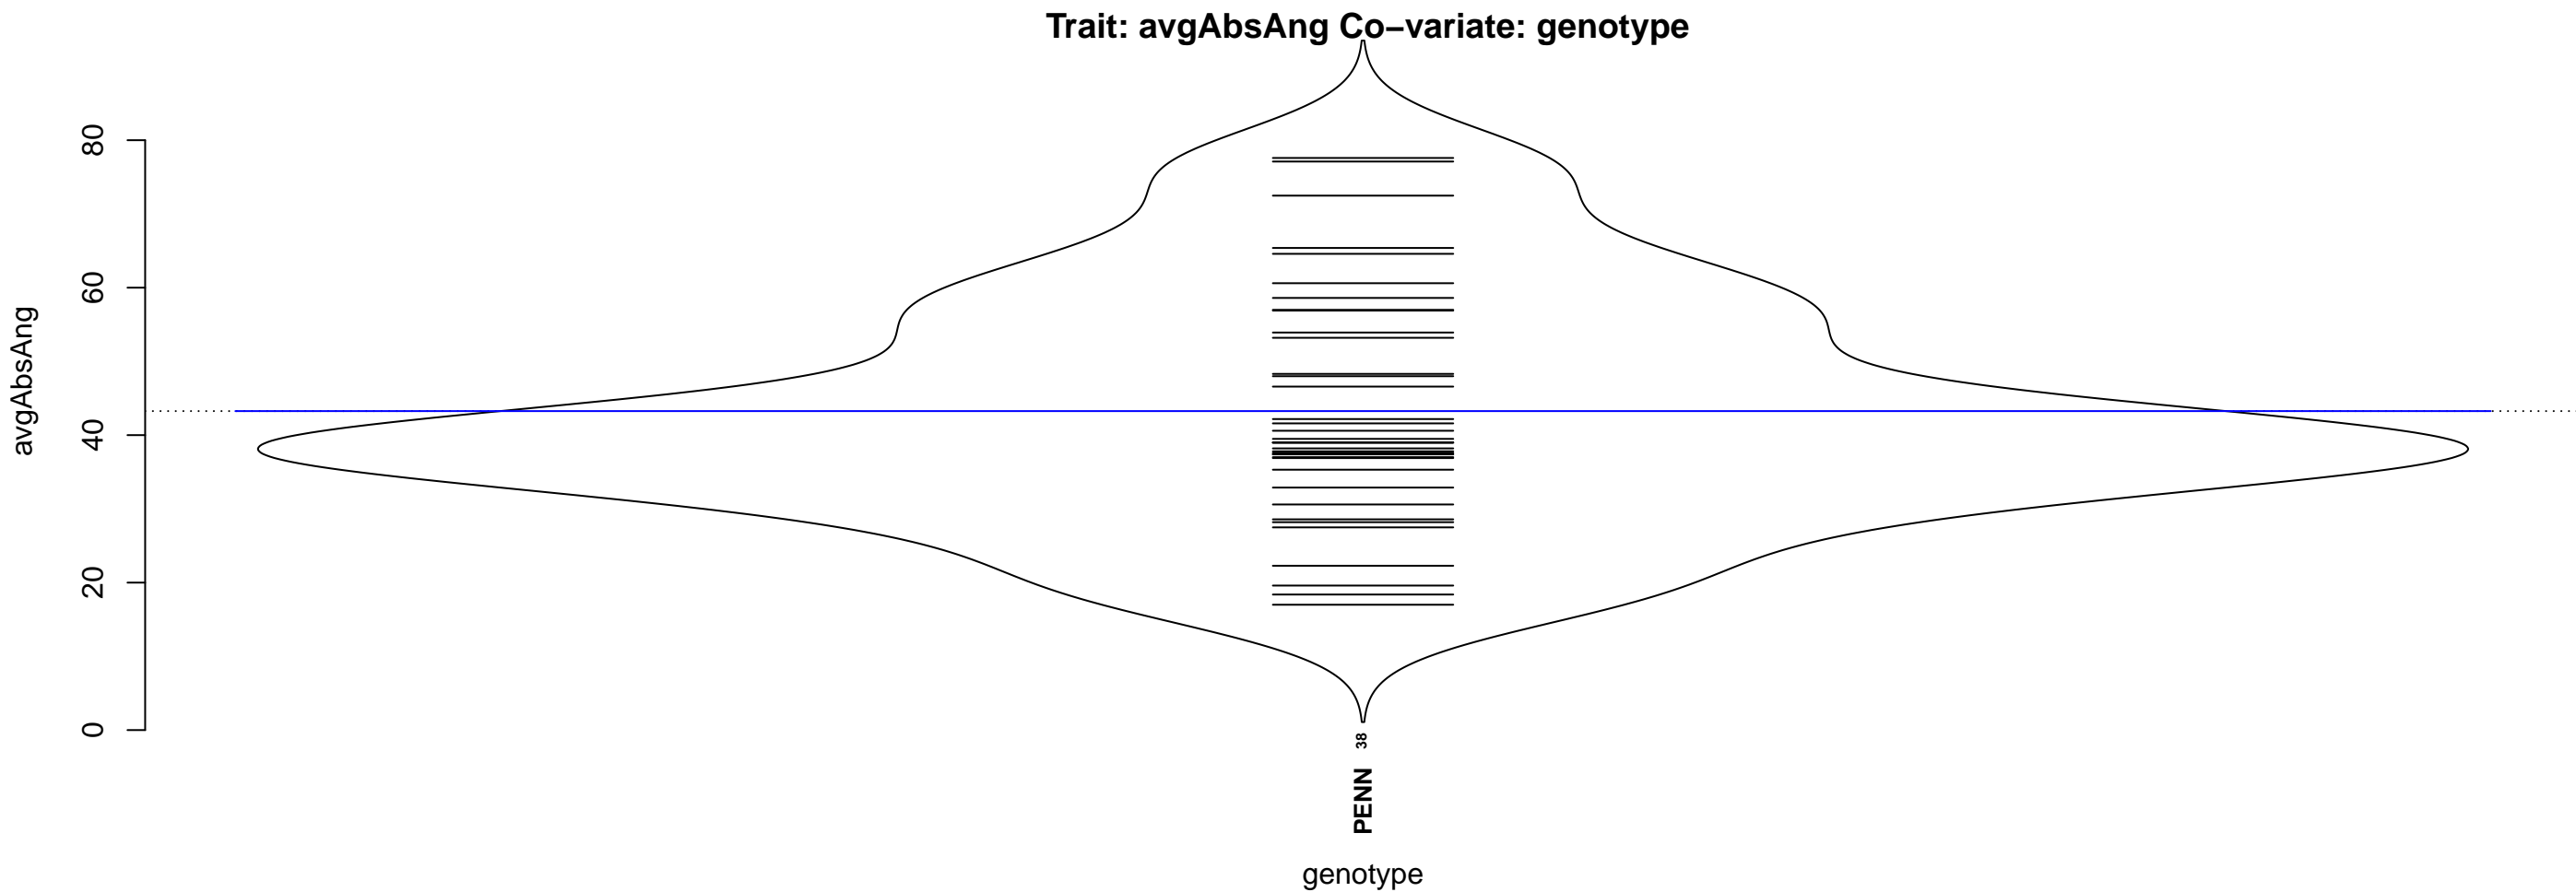

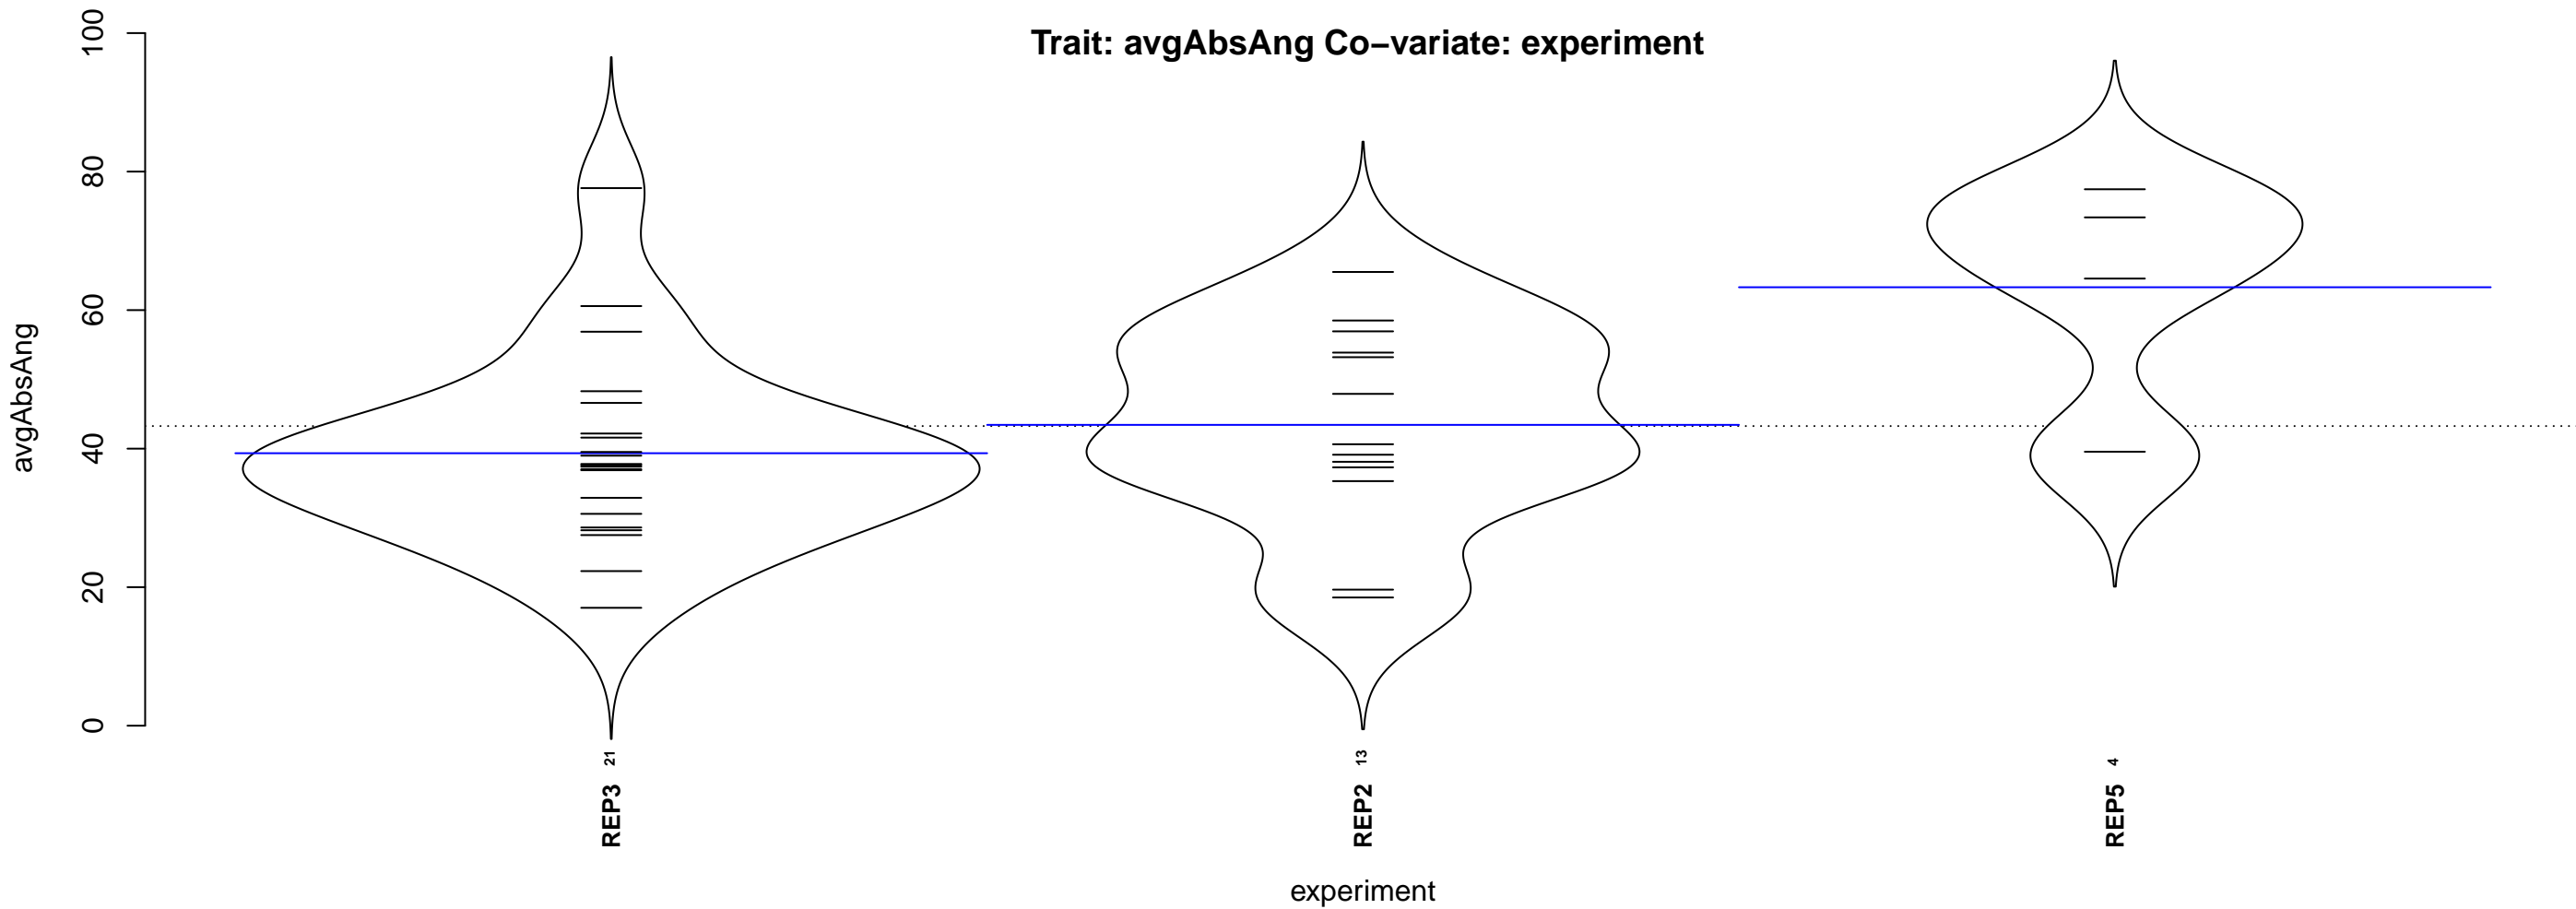

Trait: avgAbsAng Co-variate: germAge

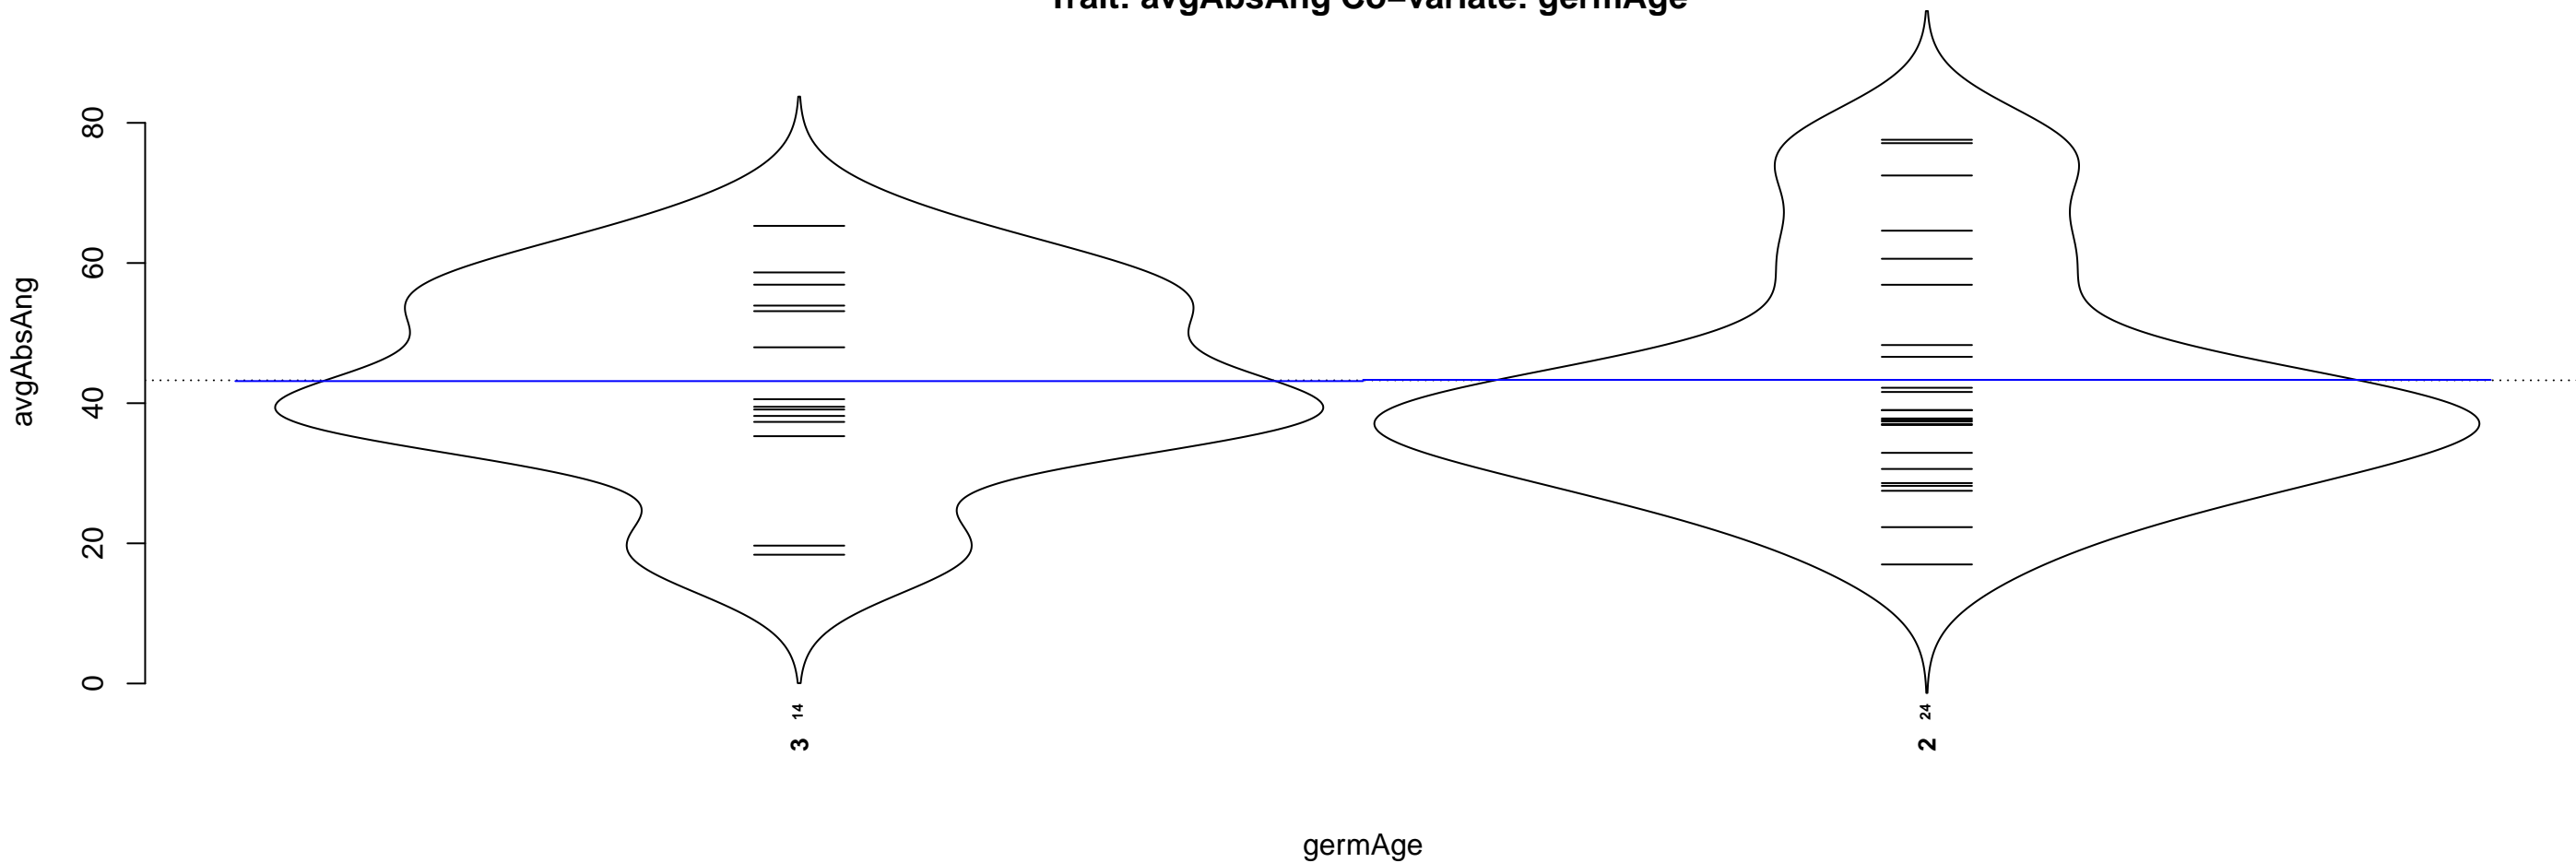

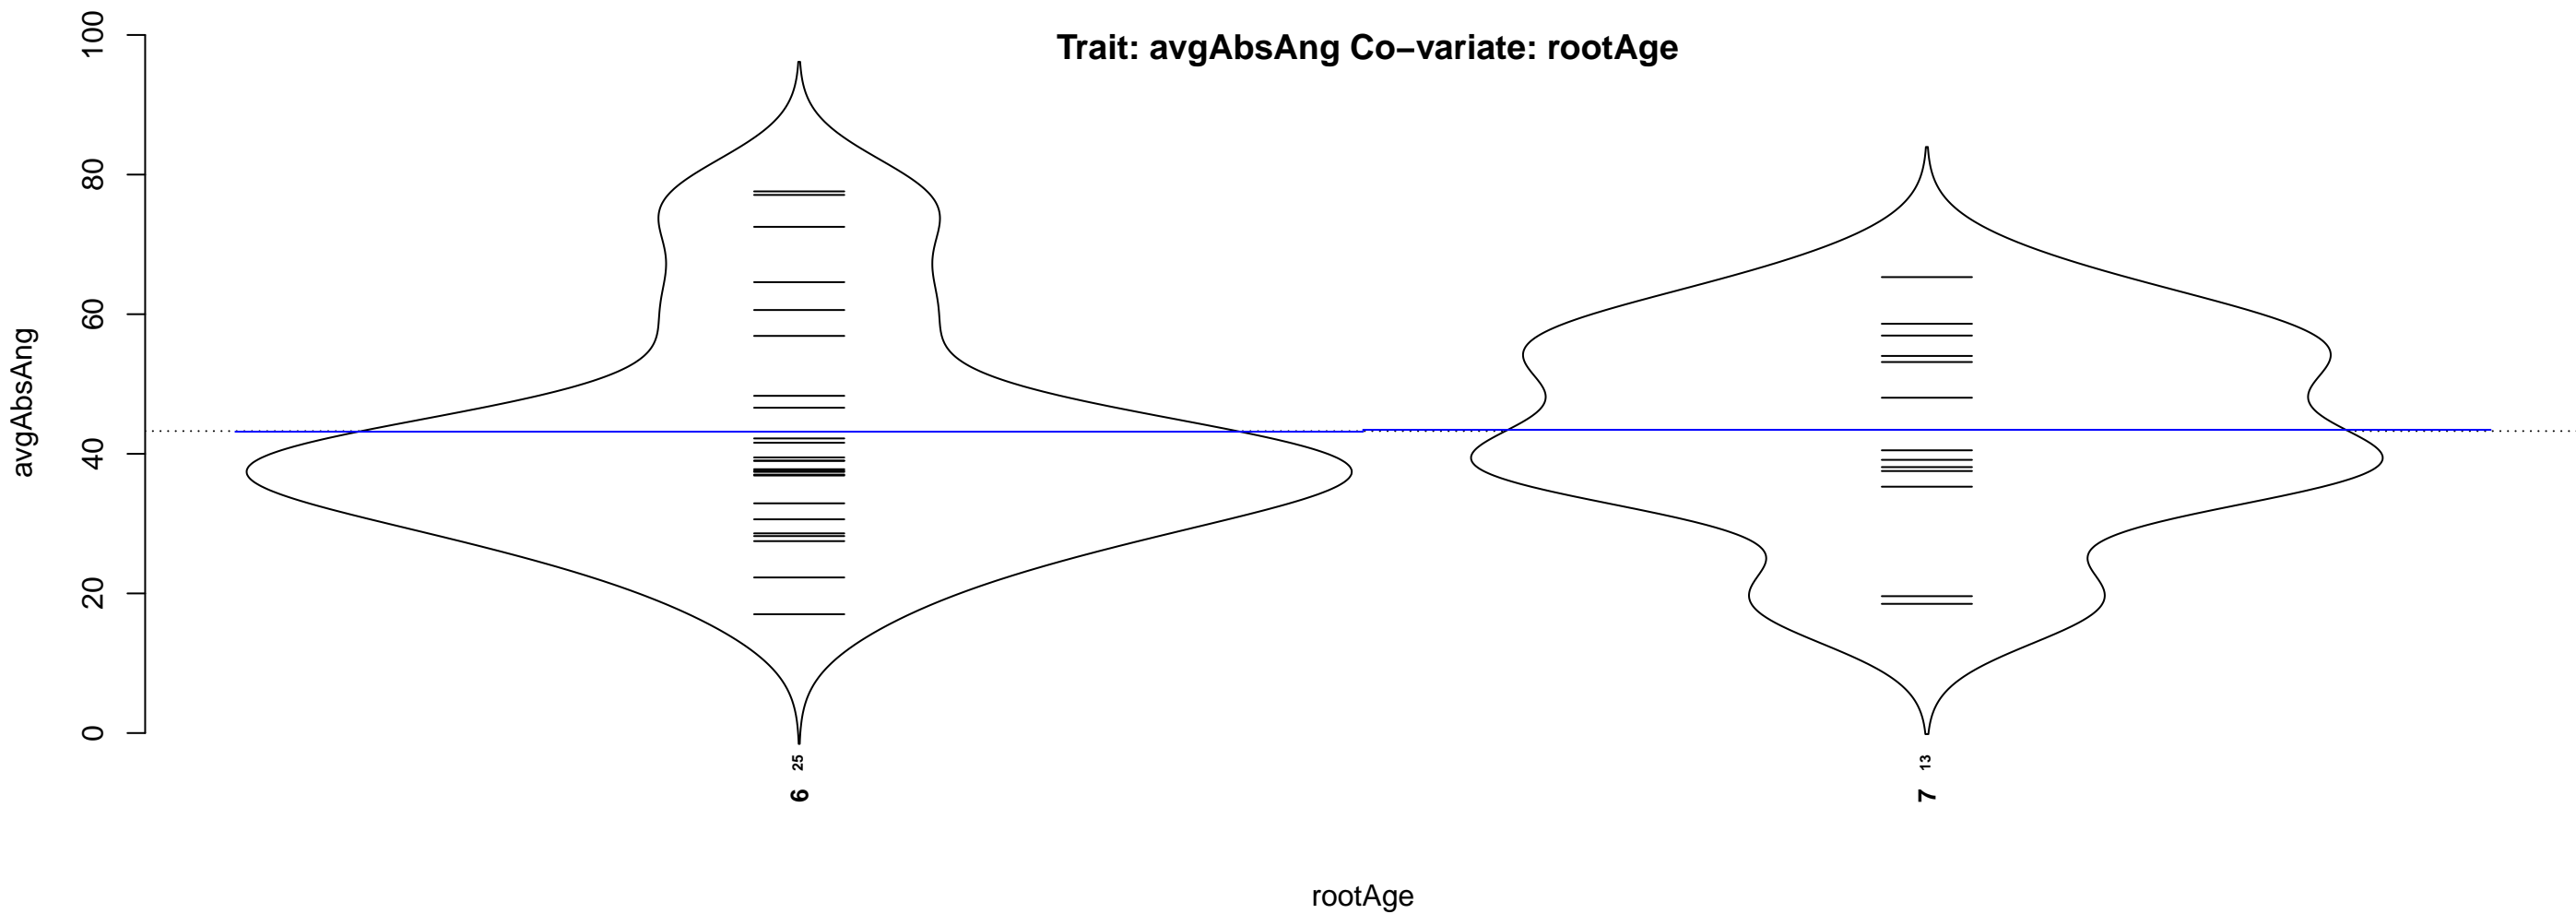

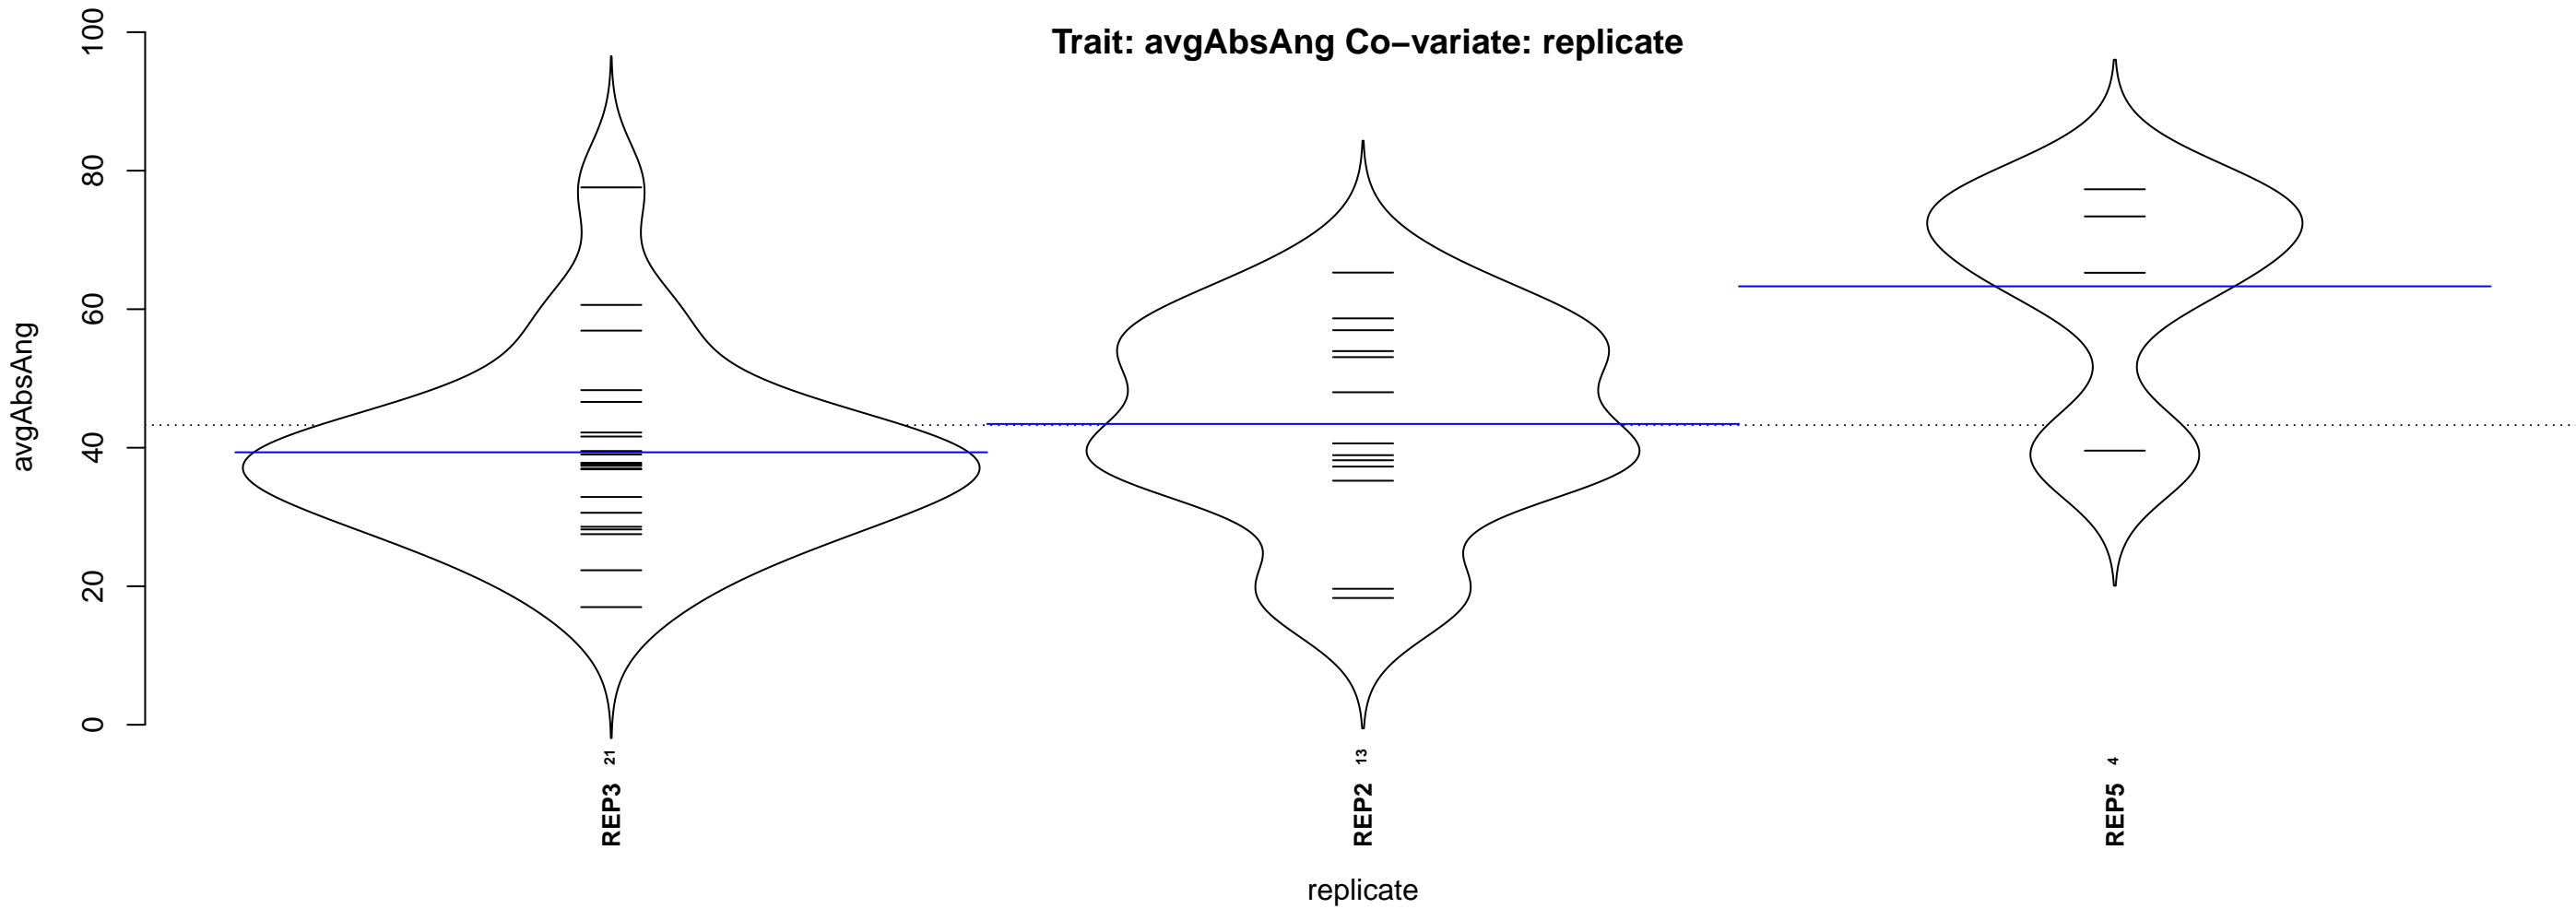

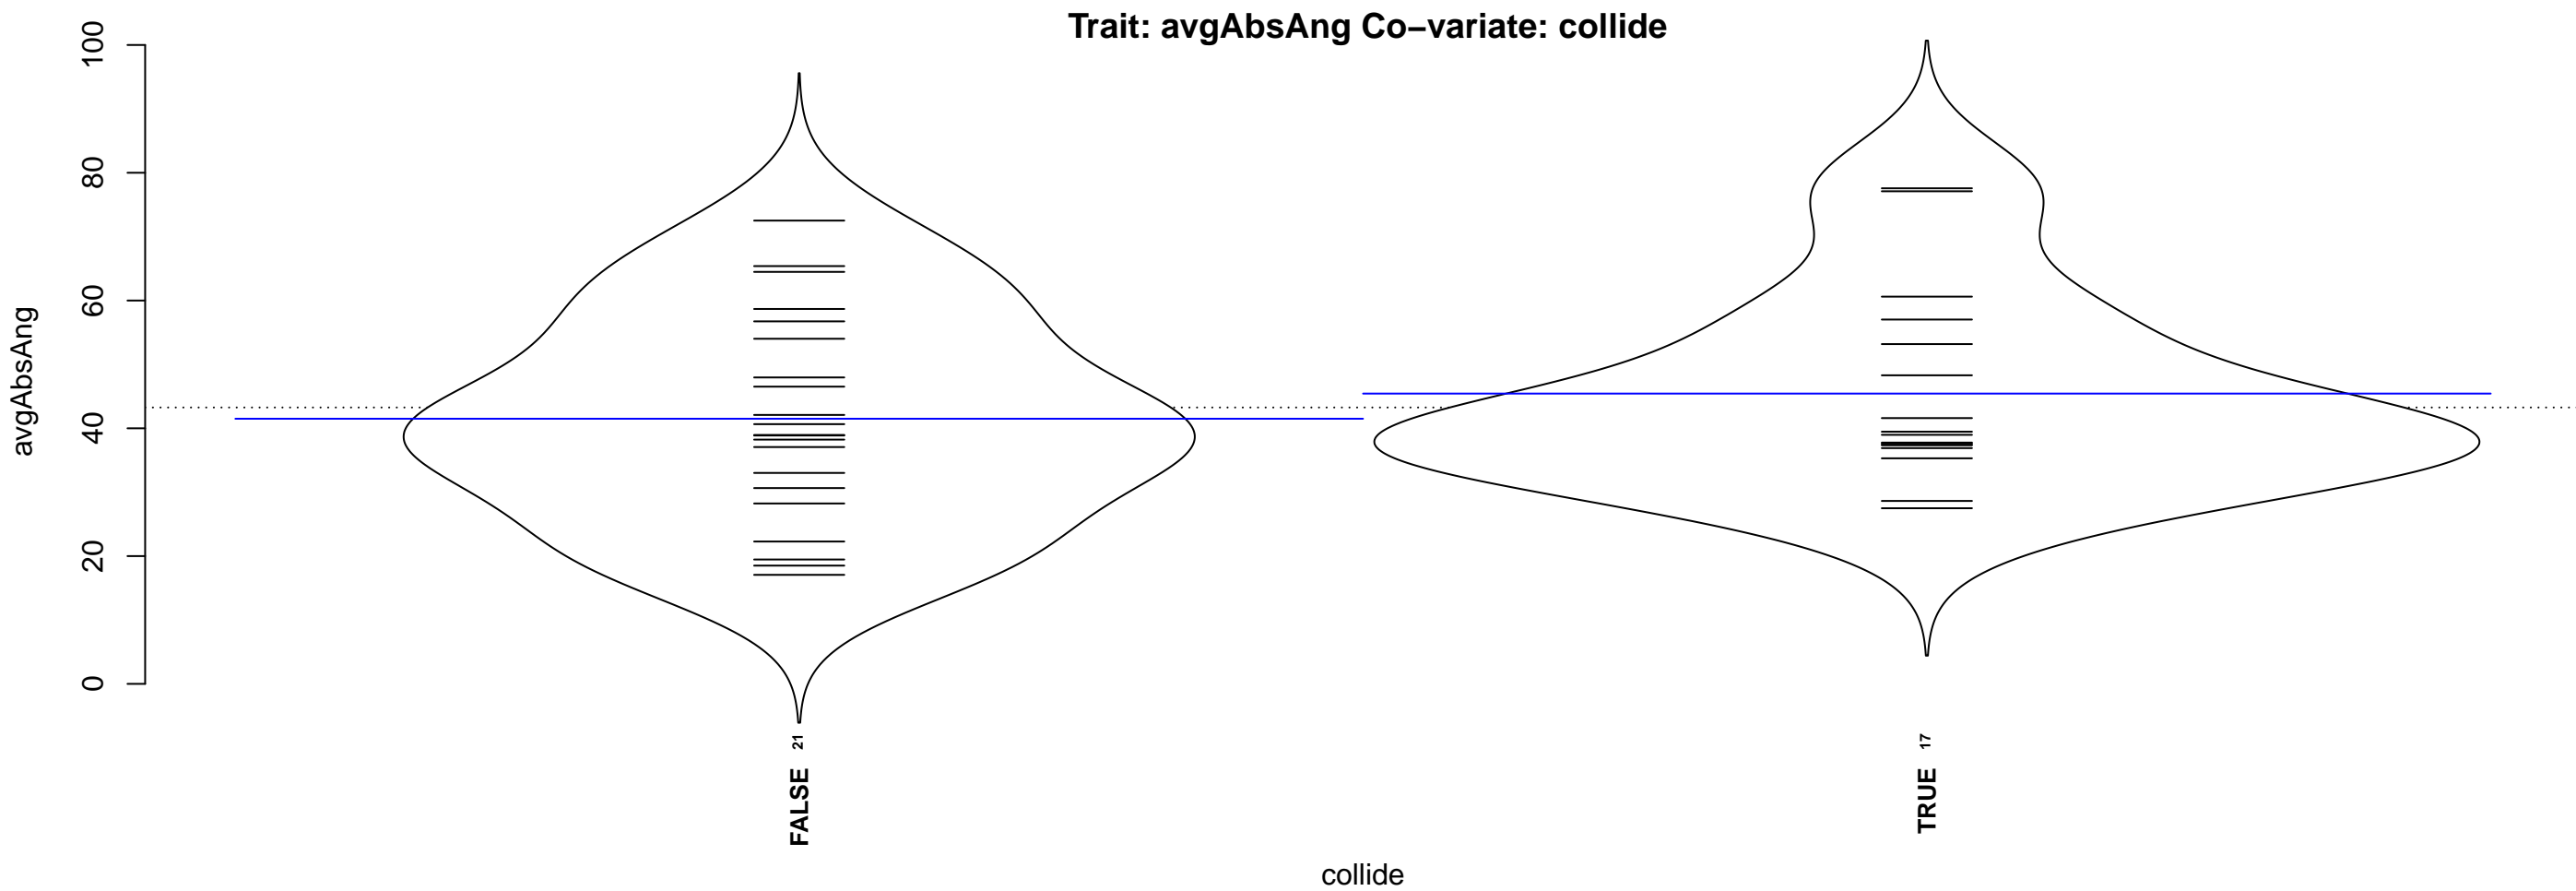

Trait: avgAbsAng Co-variate: along

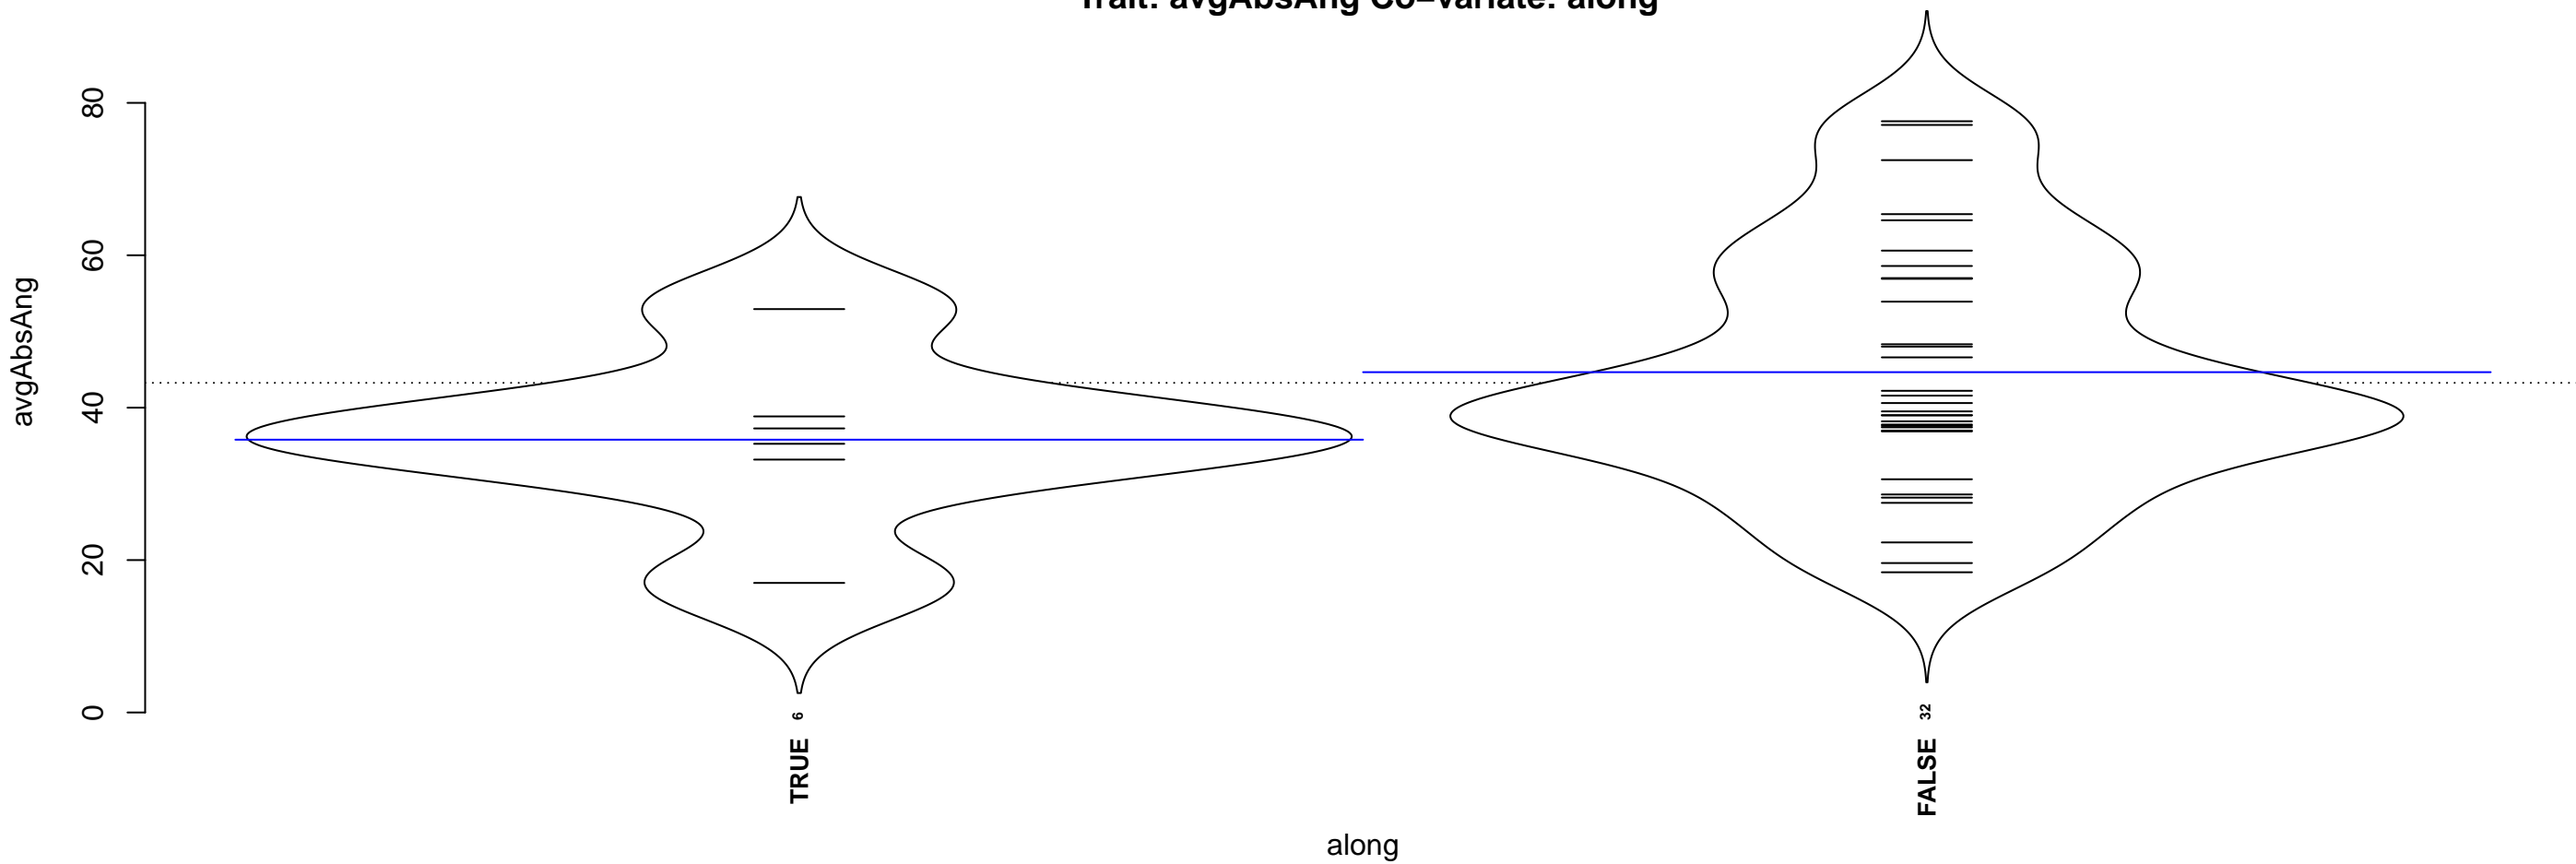



Trait: wholeAngSign Co-variate: genotype

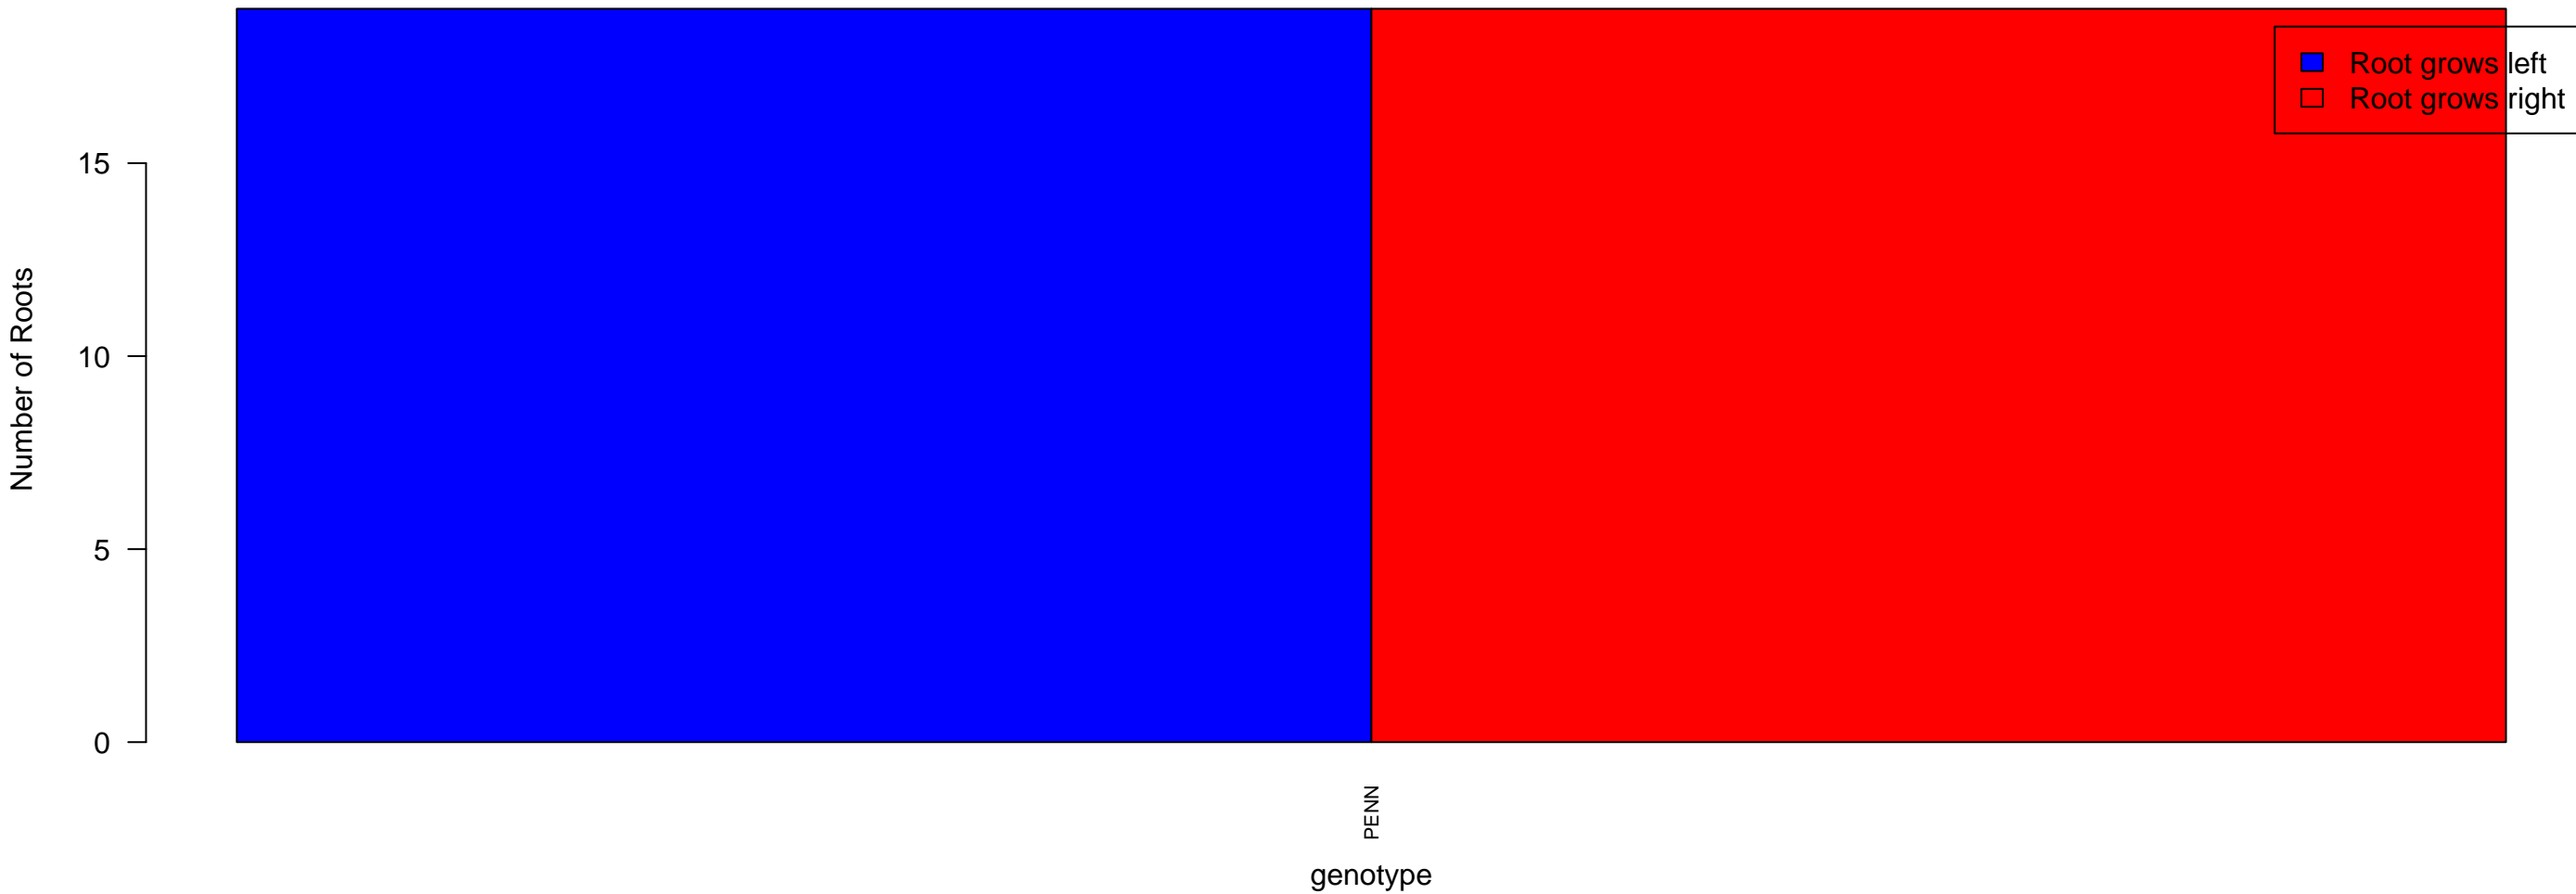

Trait: wholeAngSign Co-variate: experiment

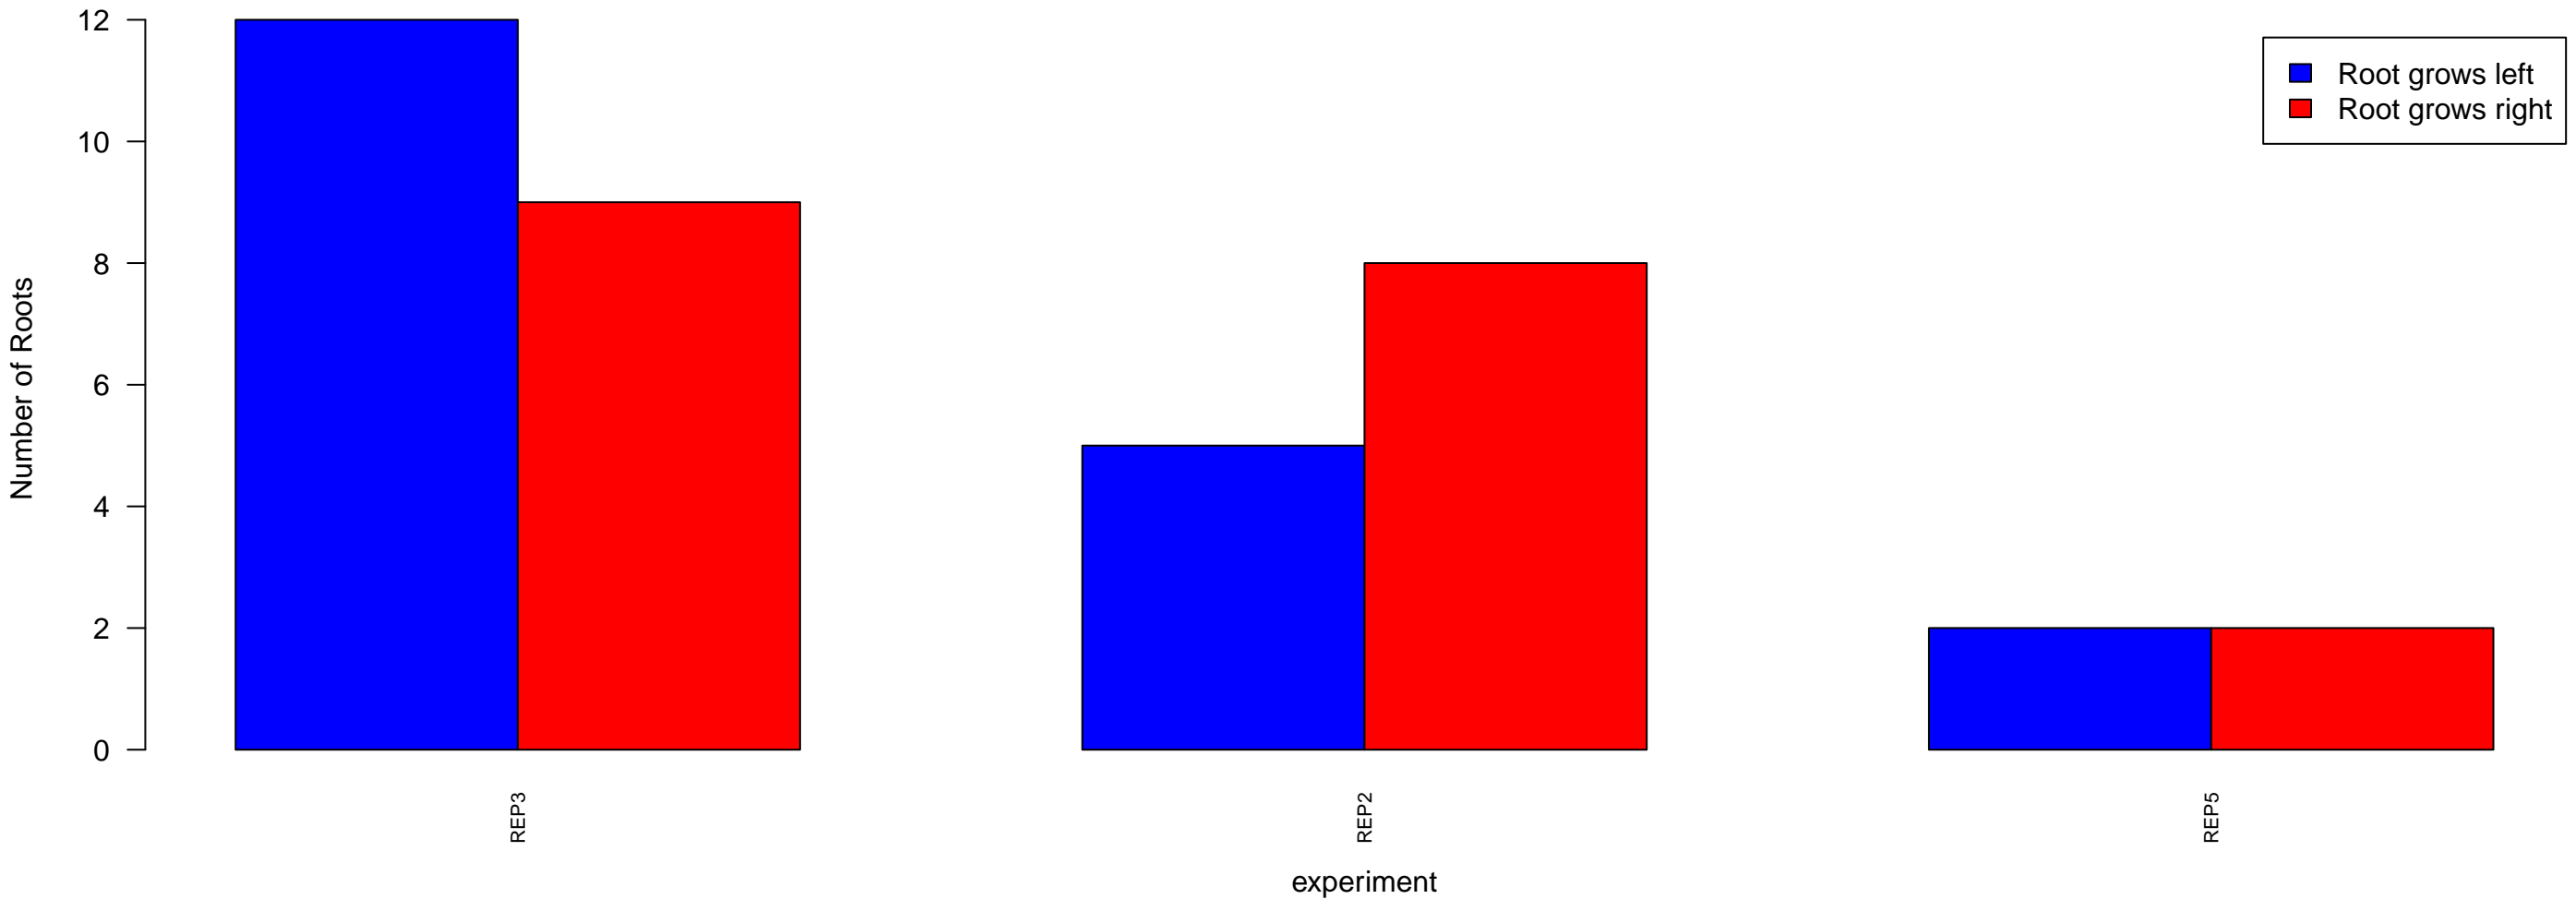

Trait: wholeAngSign Co-variate: germAge

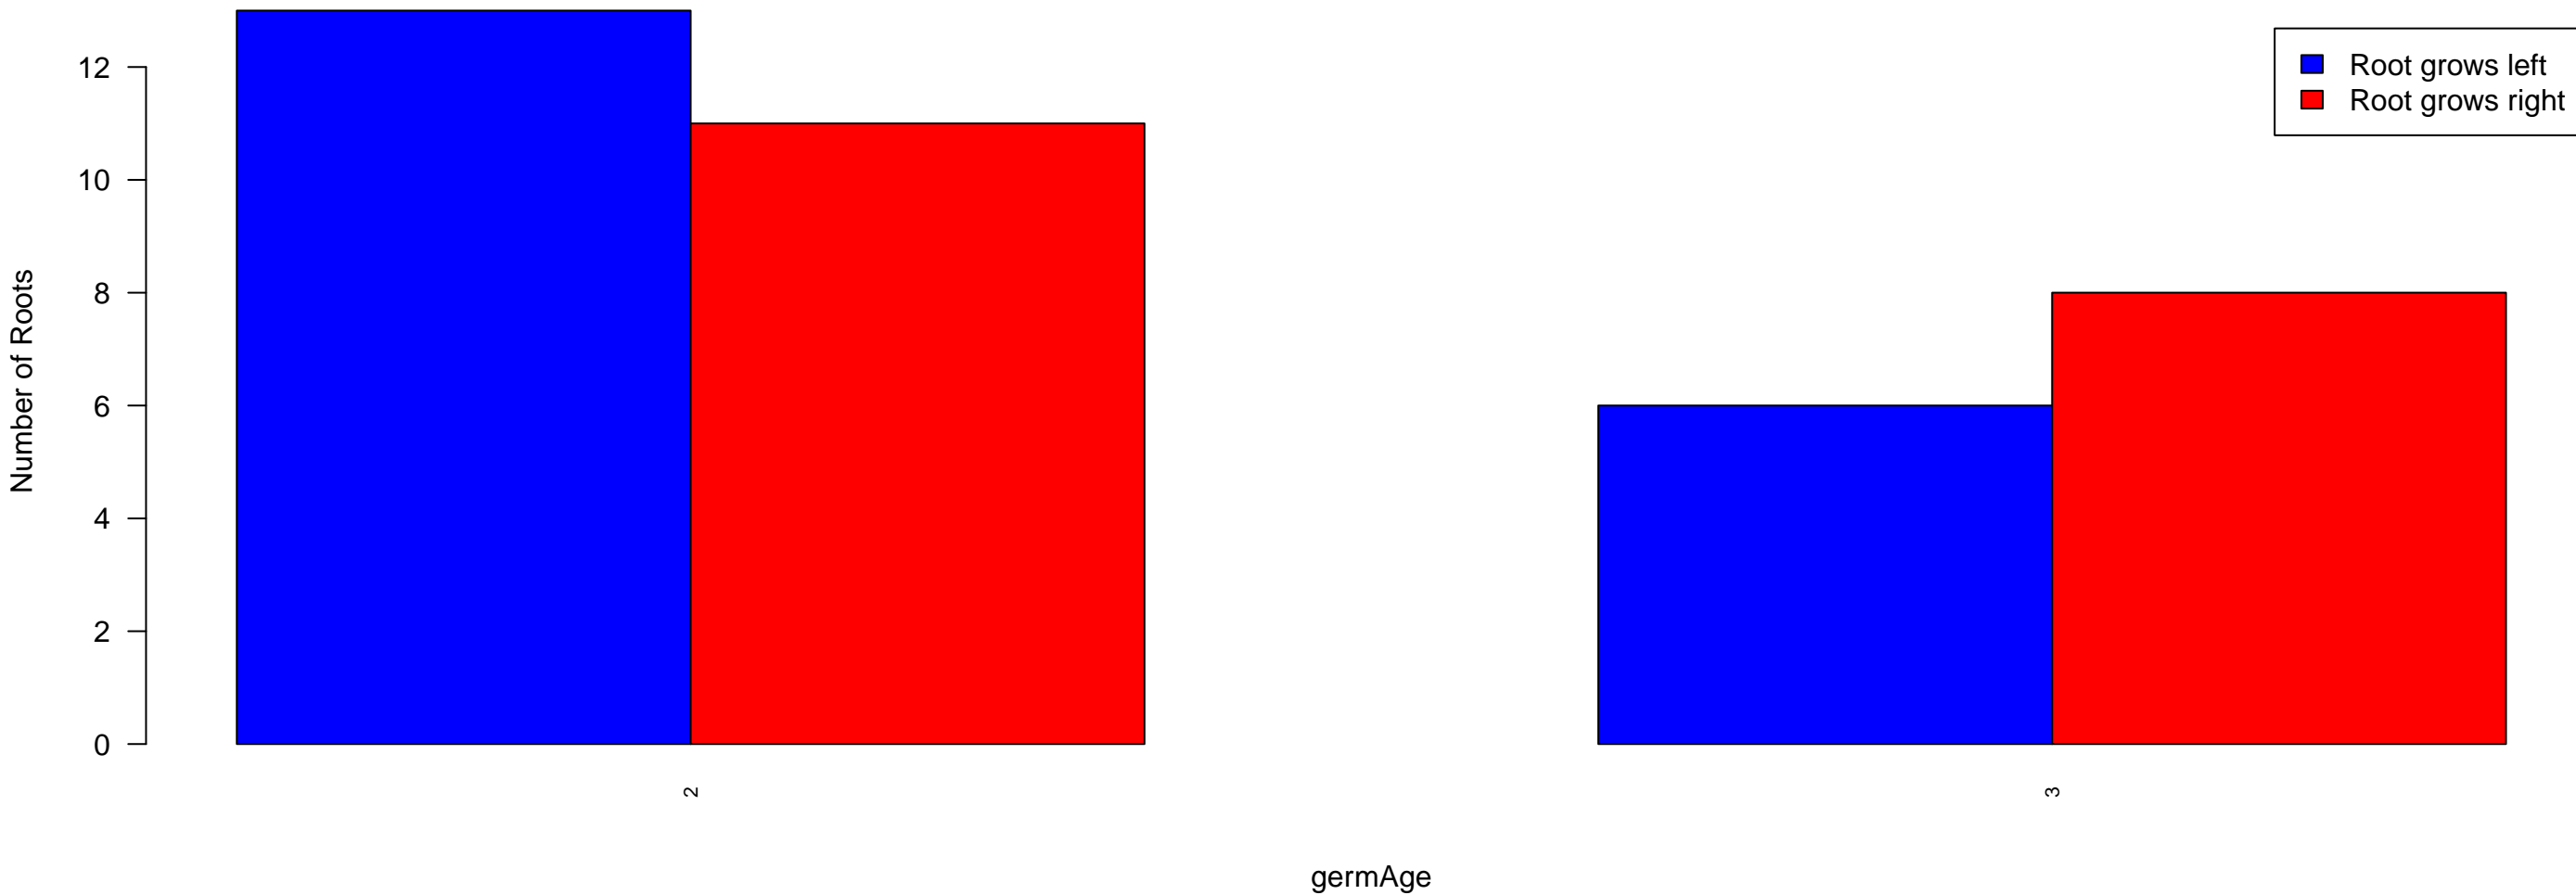

Trait: wholeAngSign Co-variate: rootAge

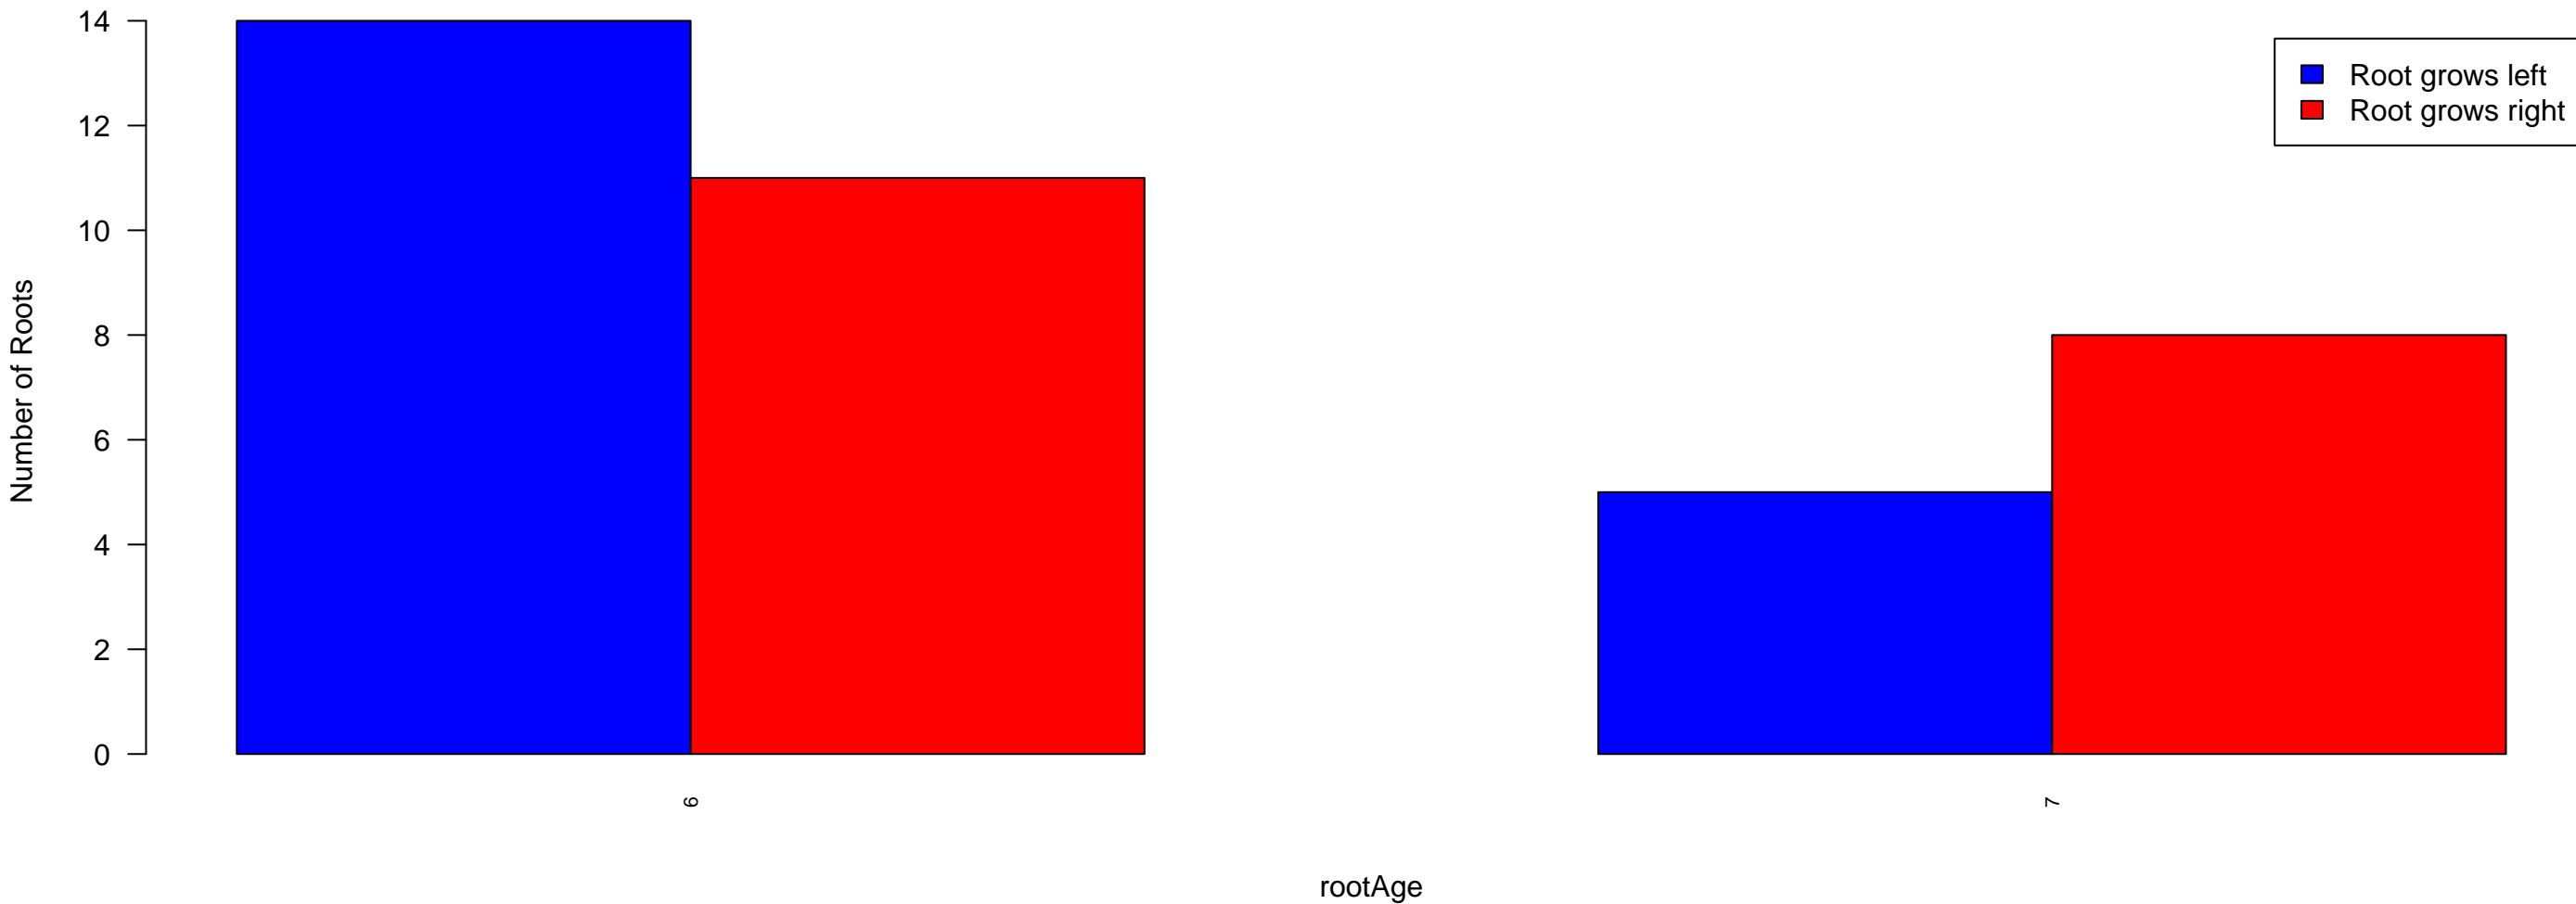

Trait: wholeAngSign Co-variate: replicate

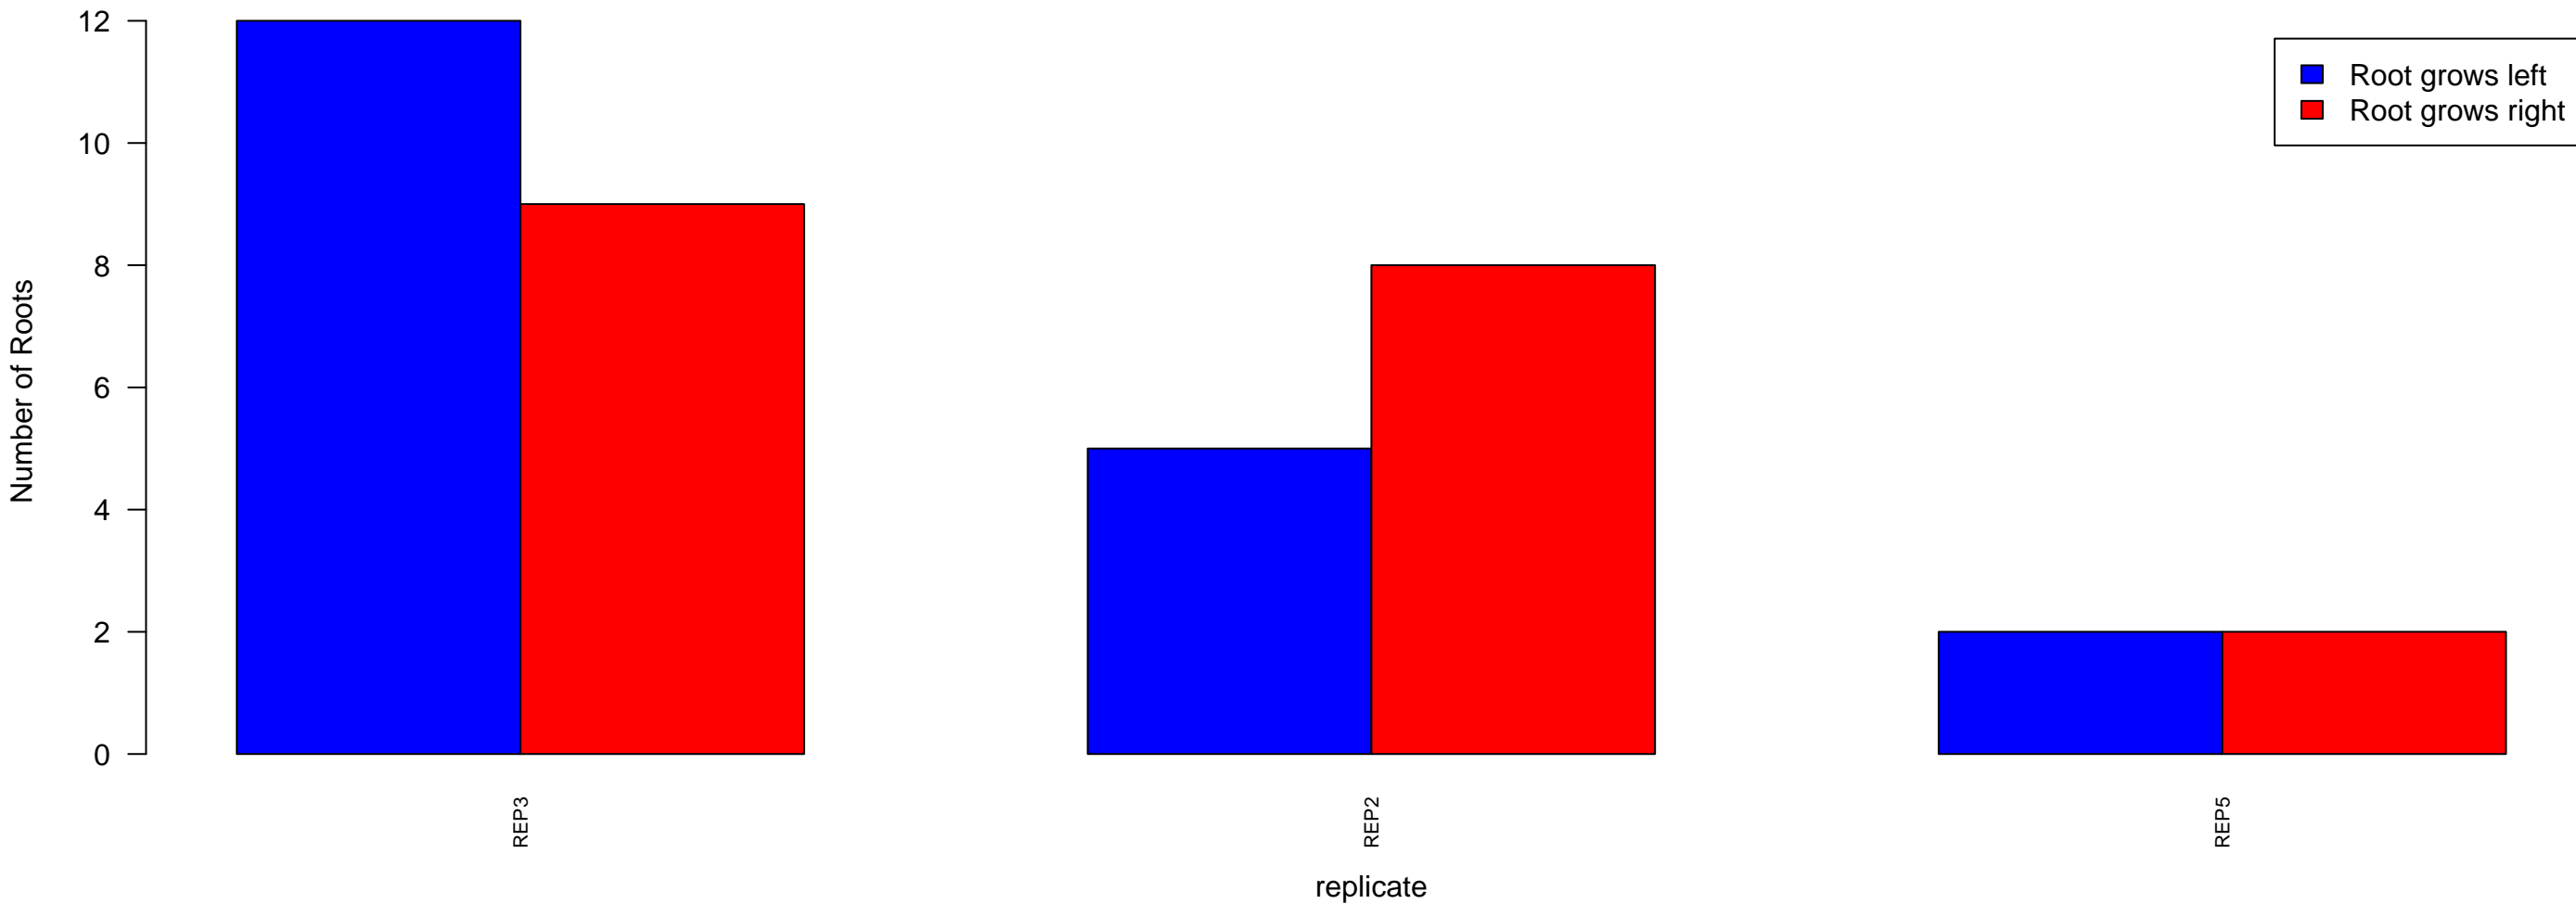

Trait: wholeAngSign Co-variate: collide

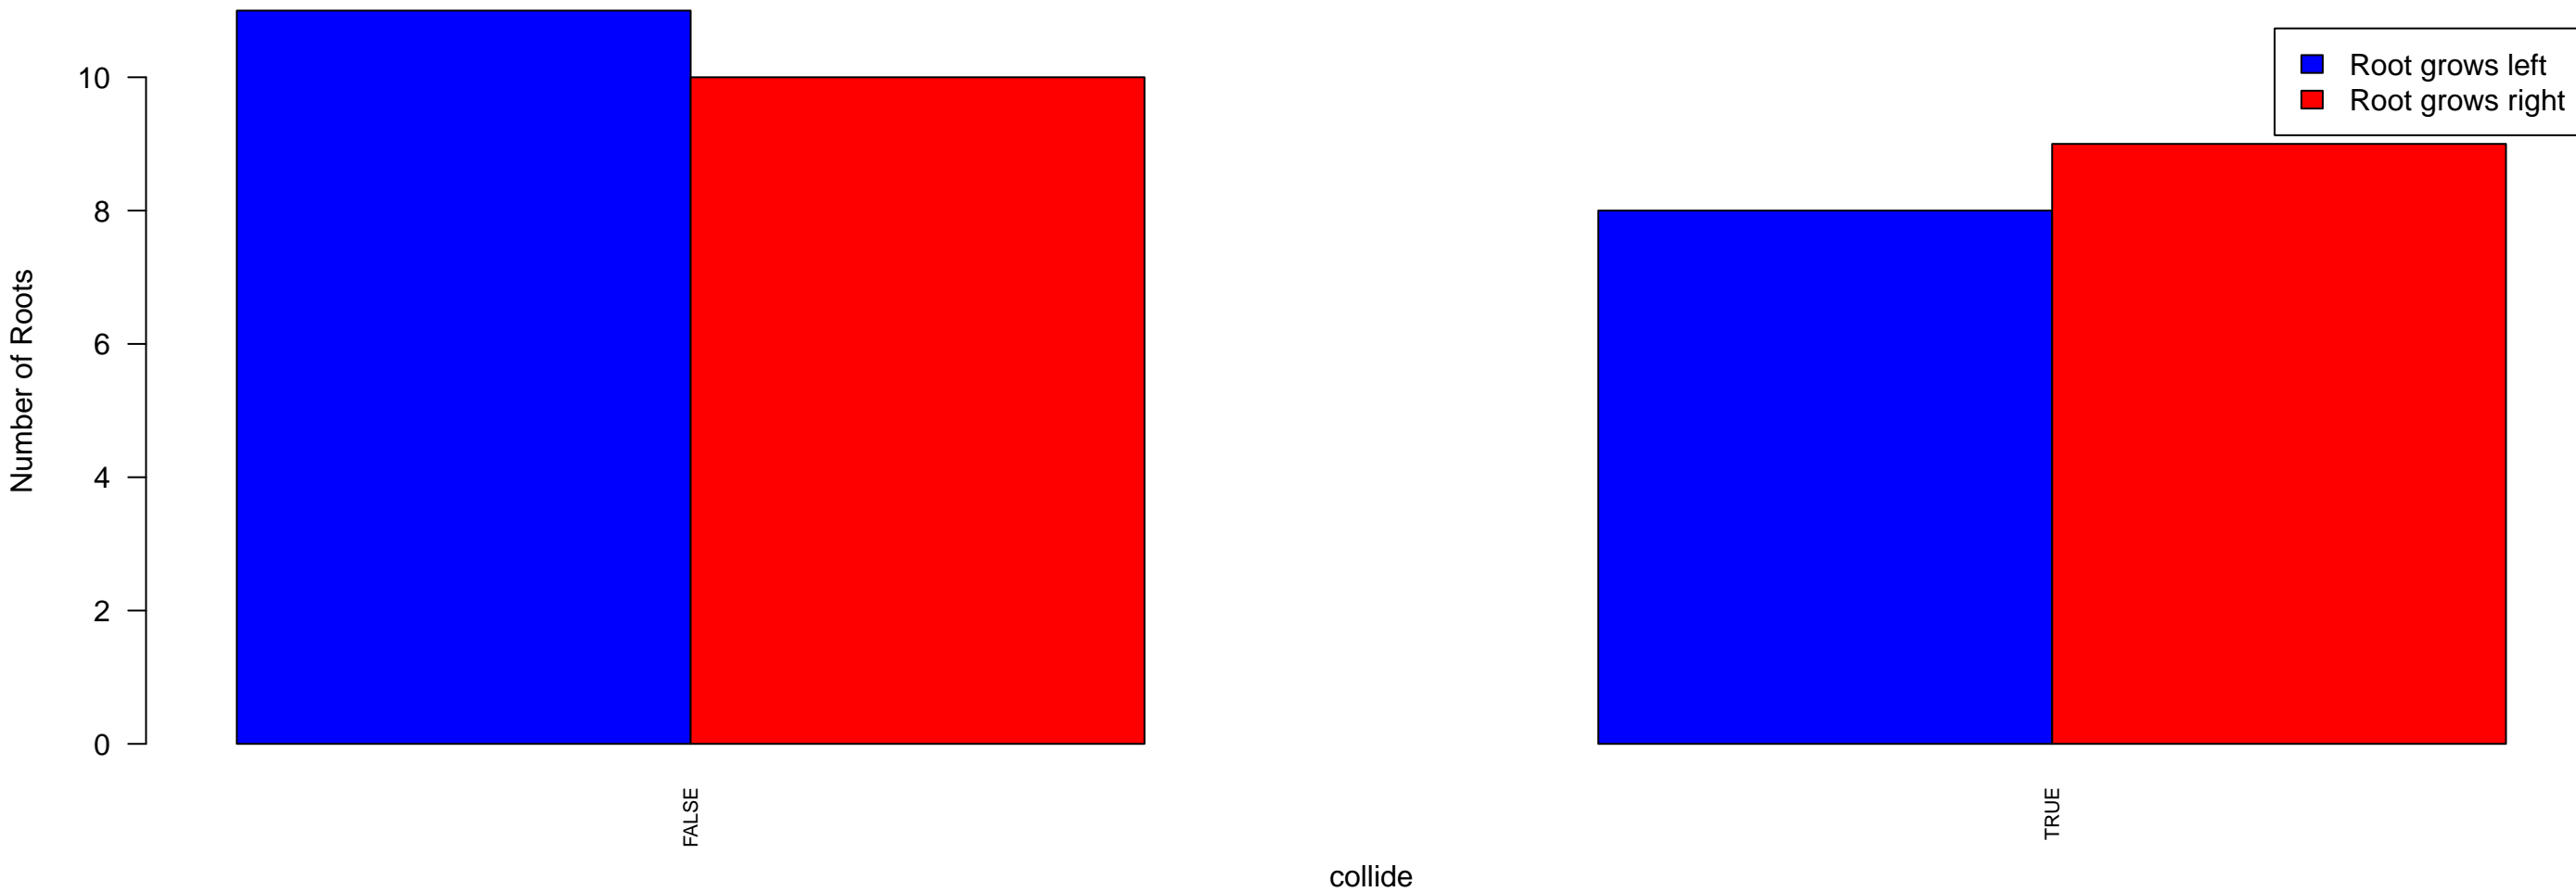

Trait: wholeAngSign Co-variate: along

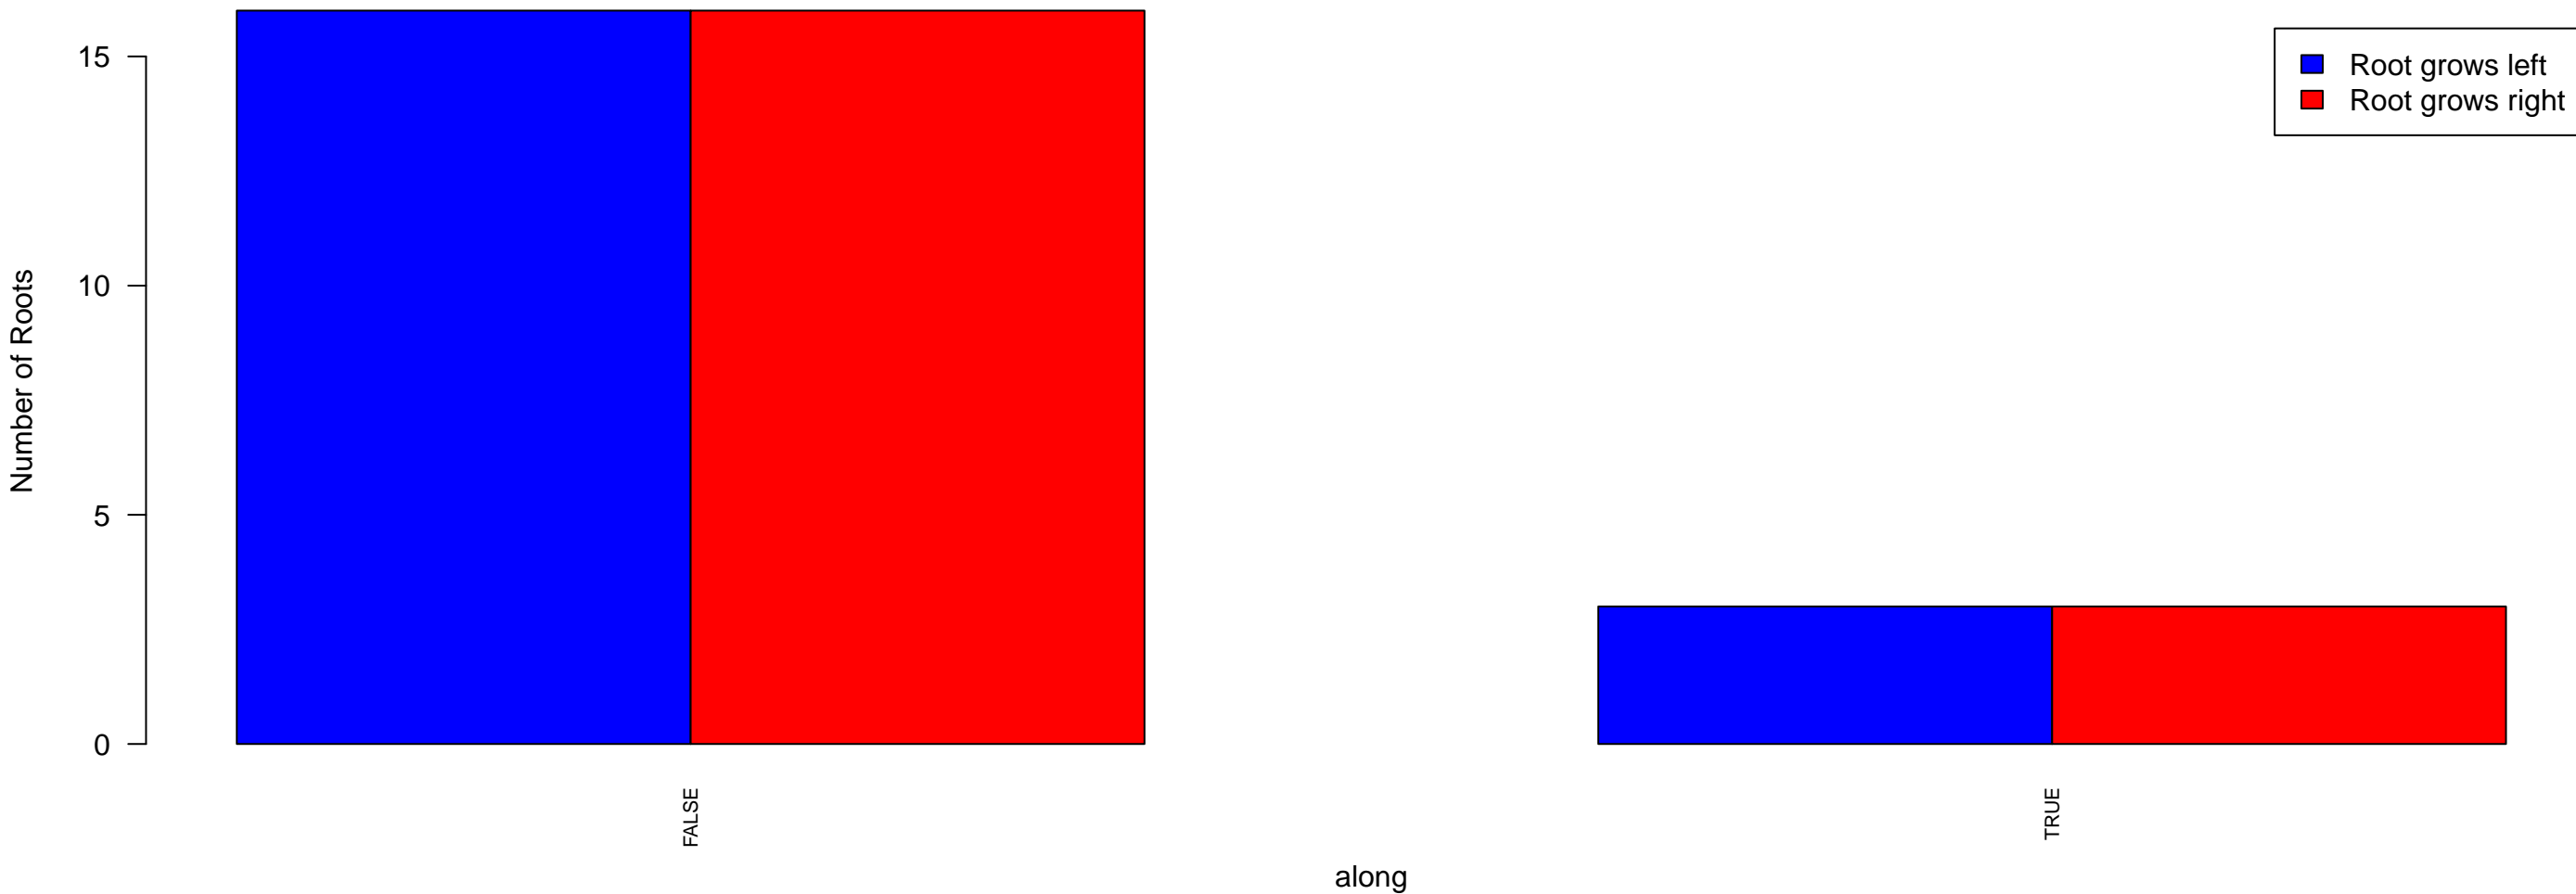

Trait: quarterAngSign Co-variate: genotype





Trait: quarterAngSign Co-variate: experiment

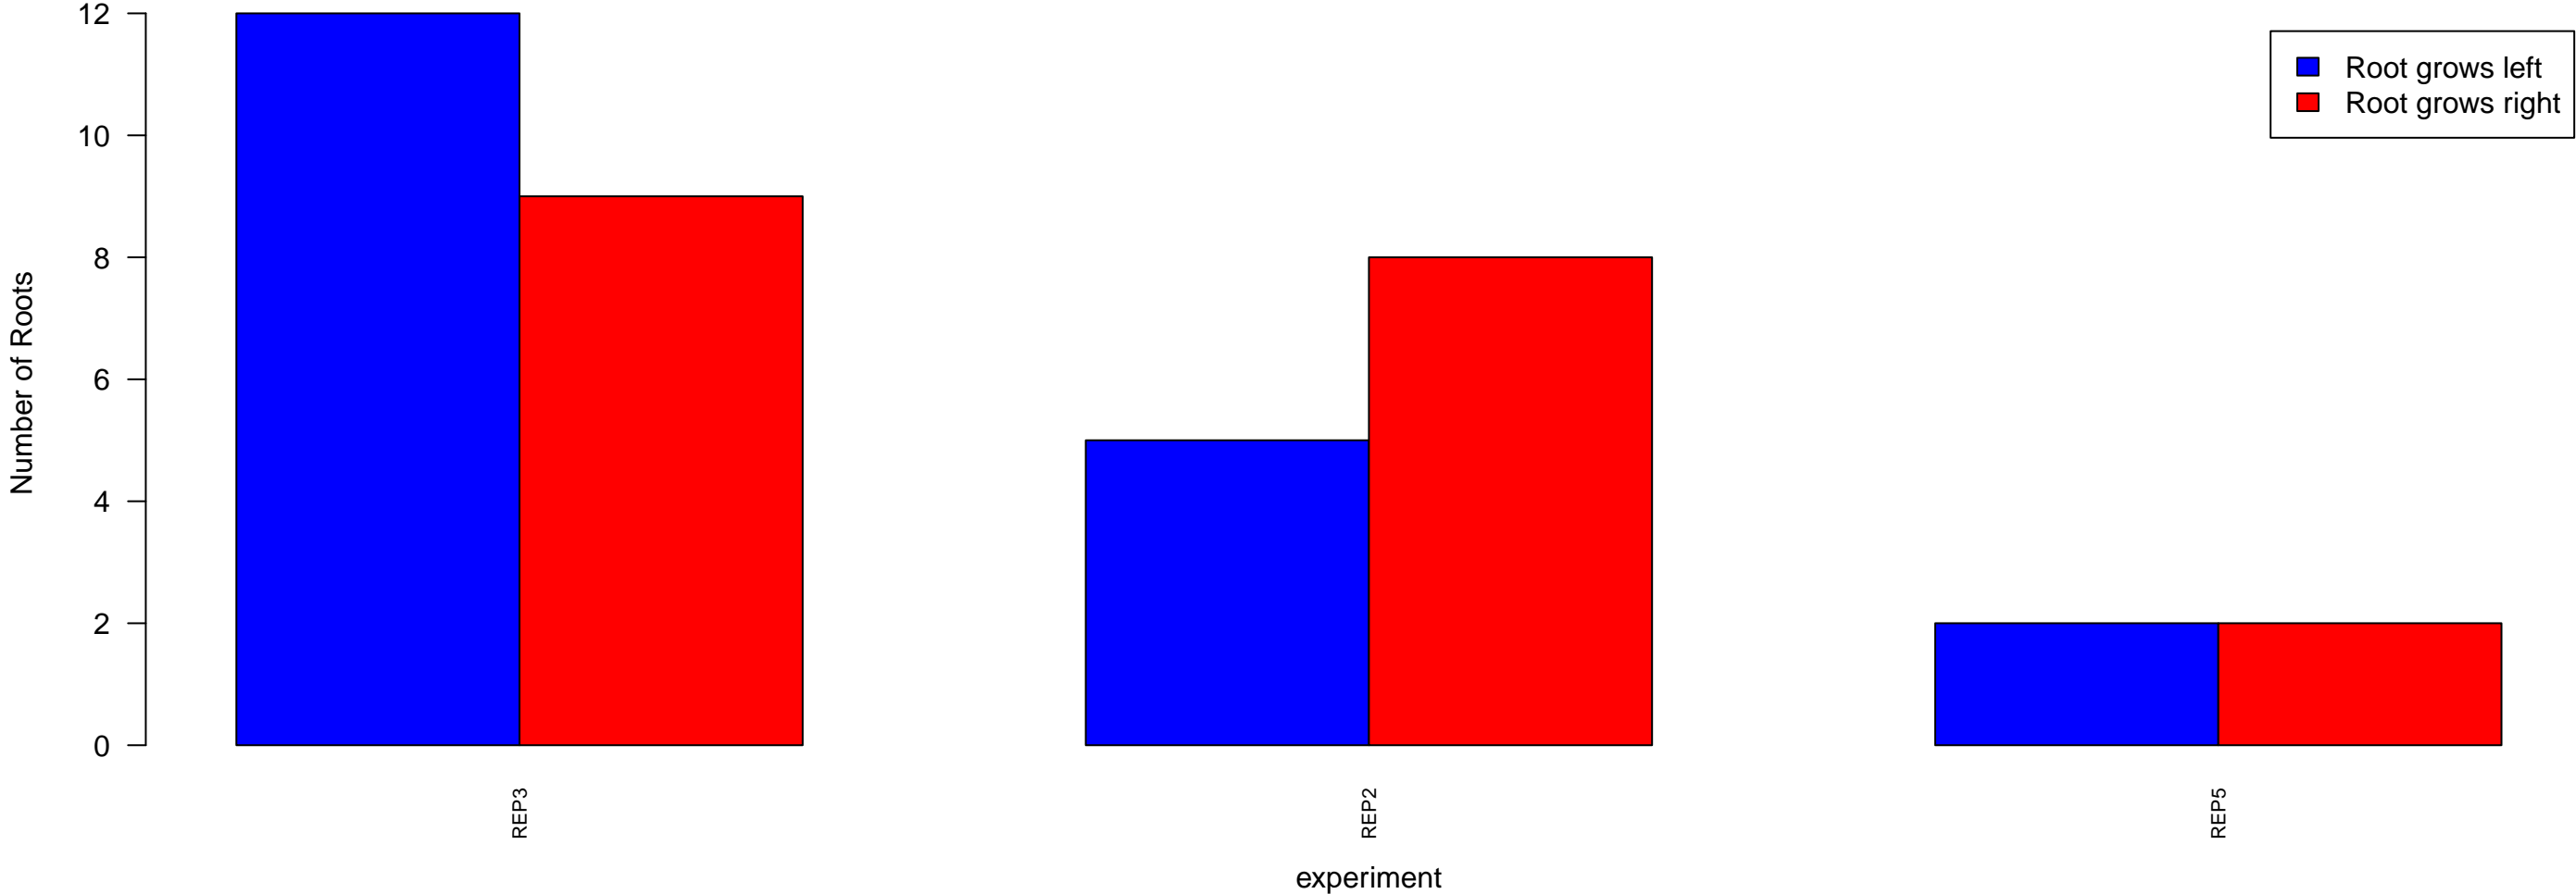

Trait: quarterAngSign Co-variate: germAge

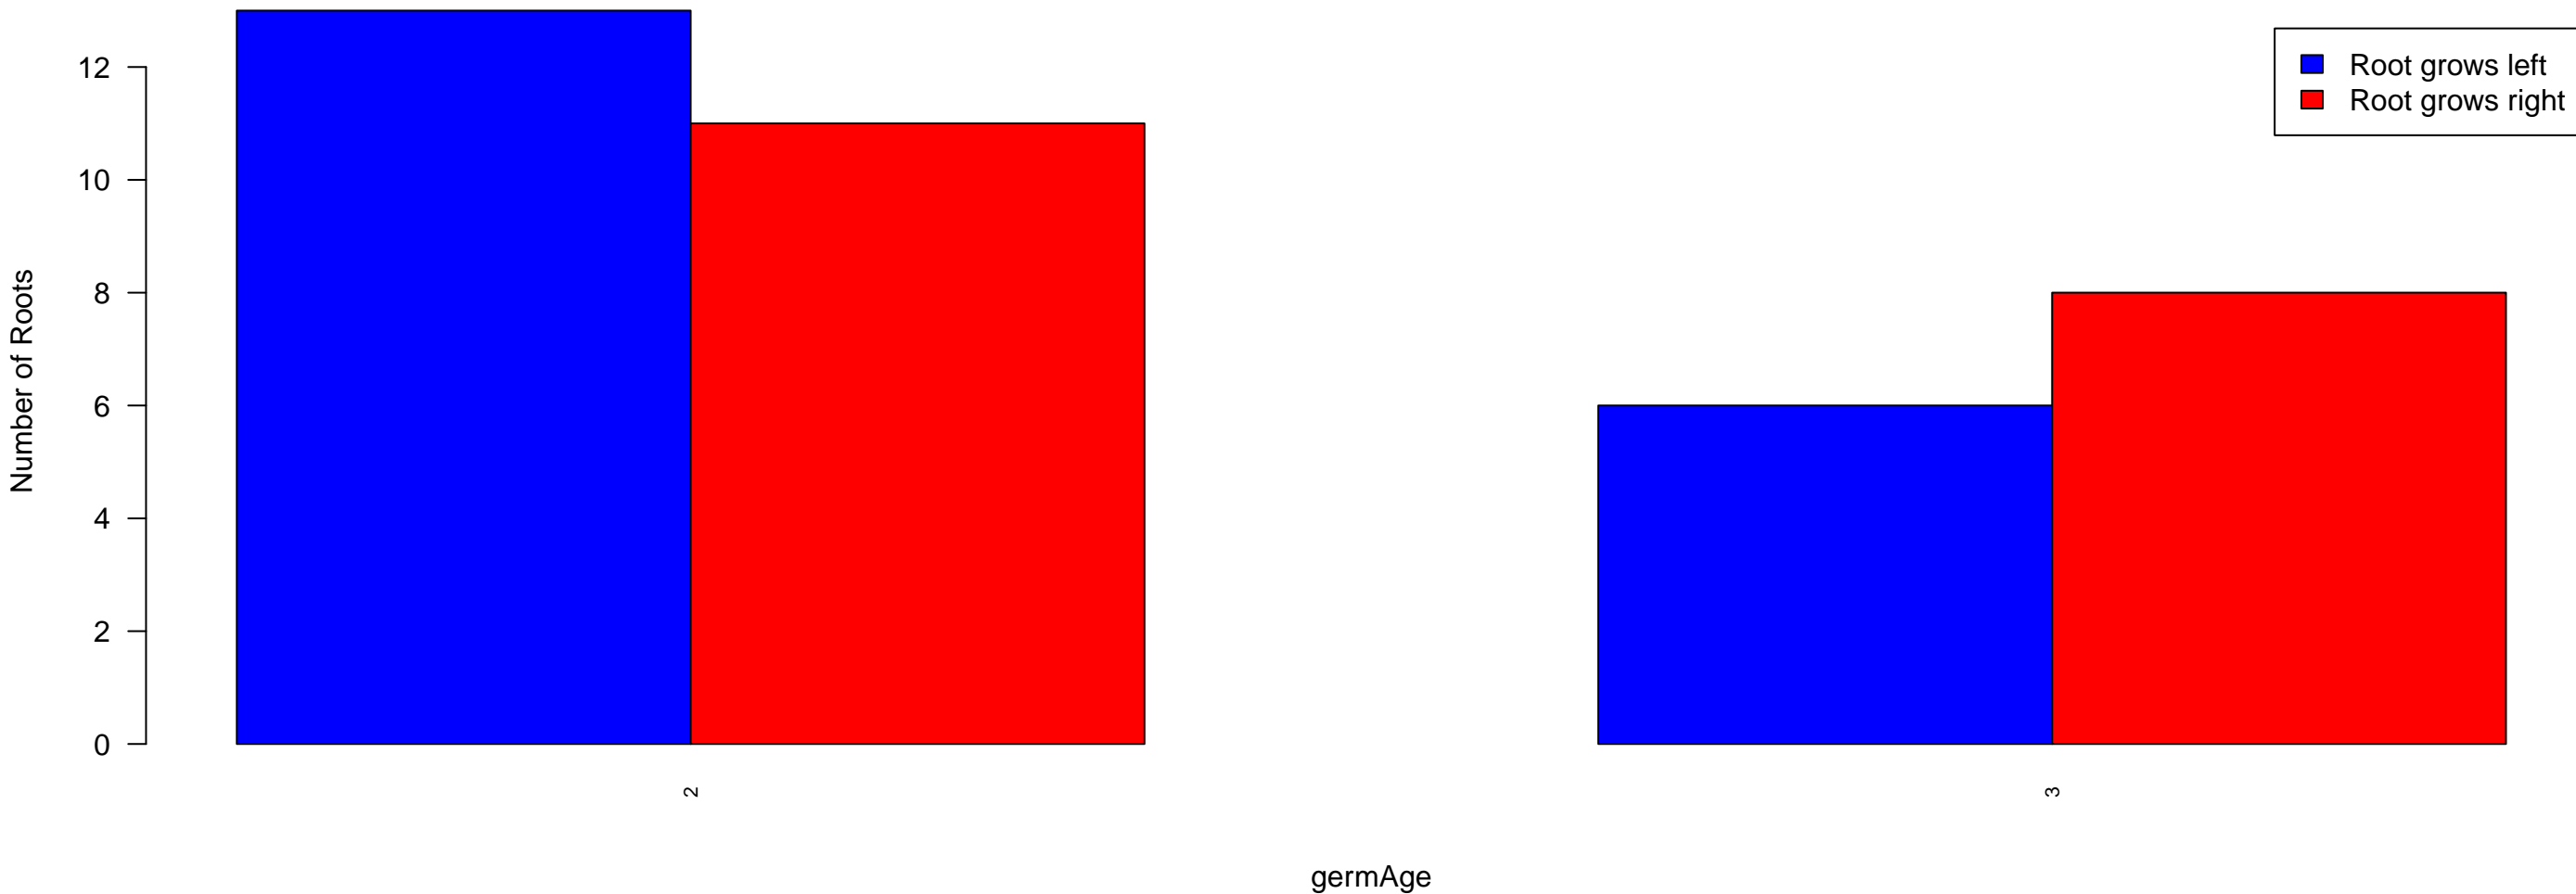

Trait: quarterAngSign Co-variate: rootAge



Trait: quarterAngSign Co-variate: replicate



Trait: quarterAngSign Co-variate: collide

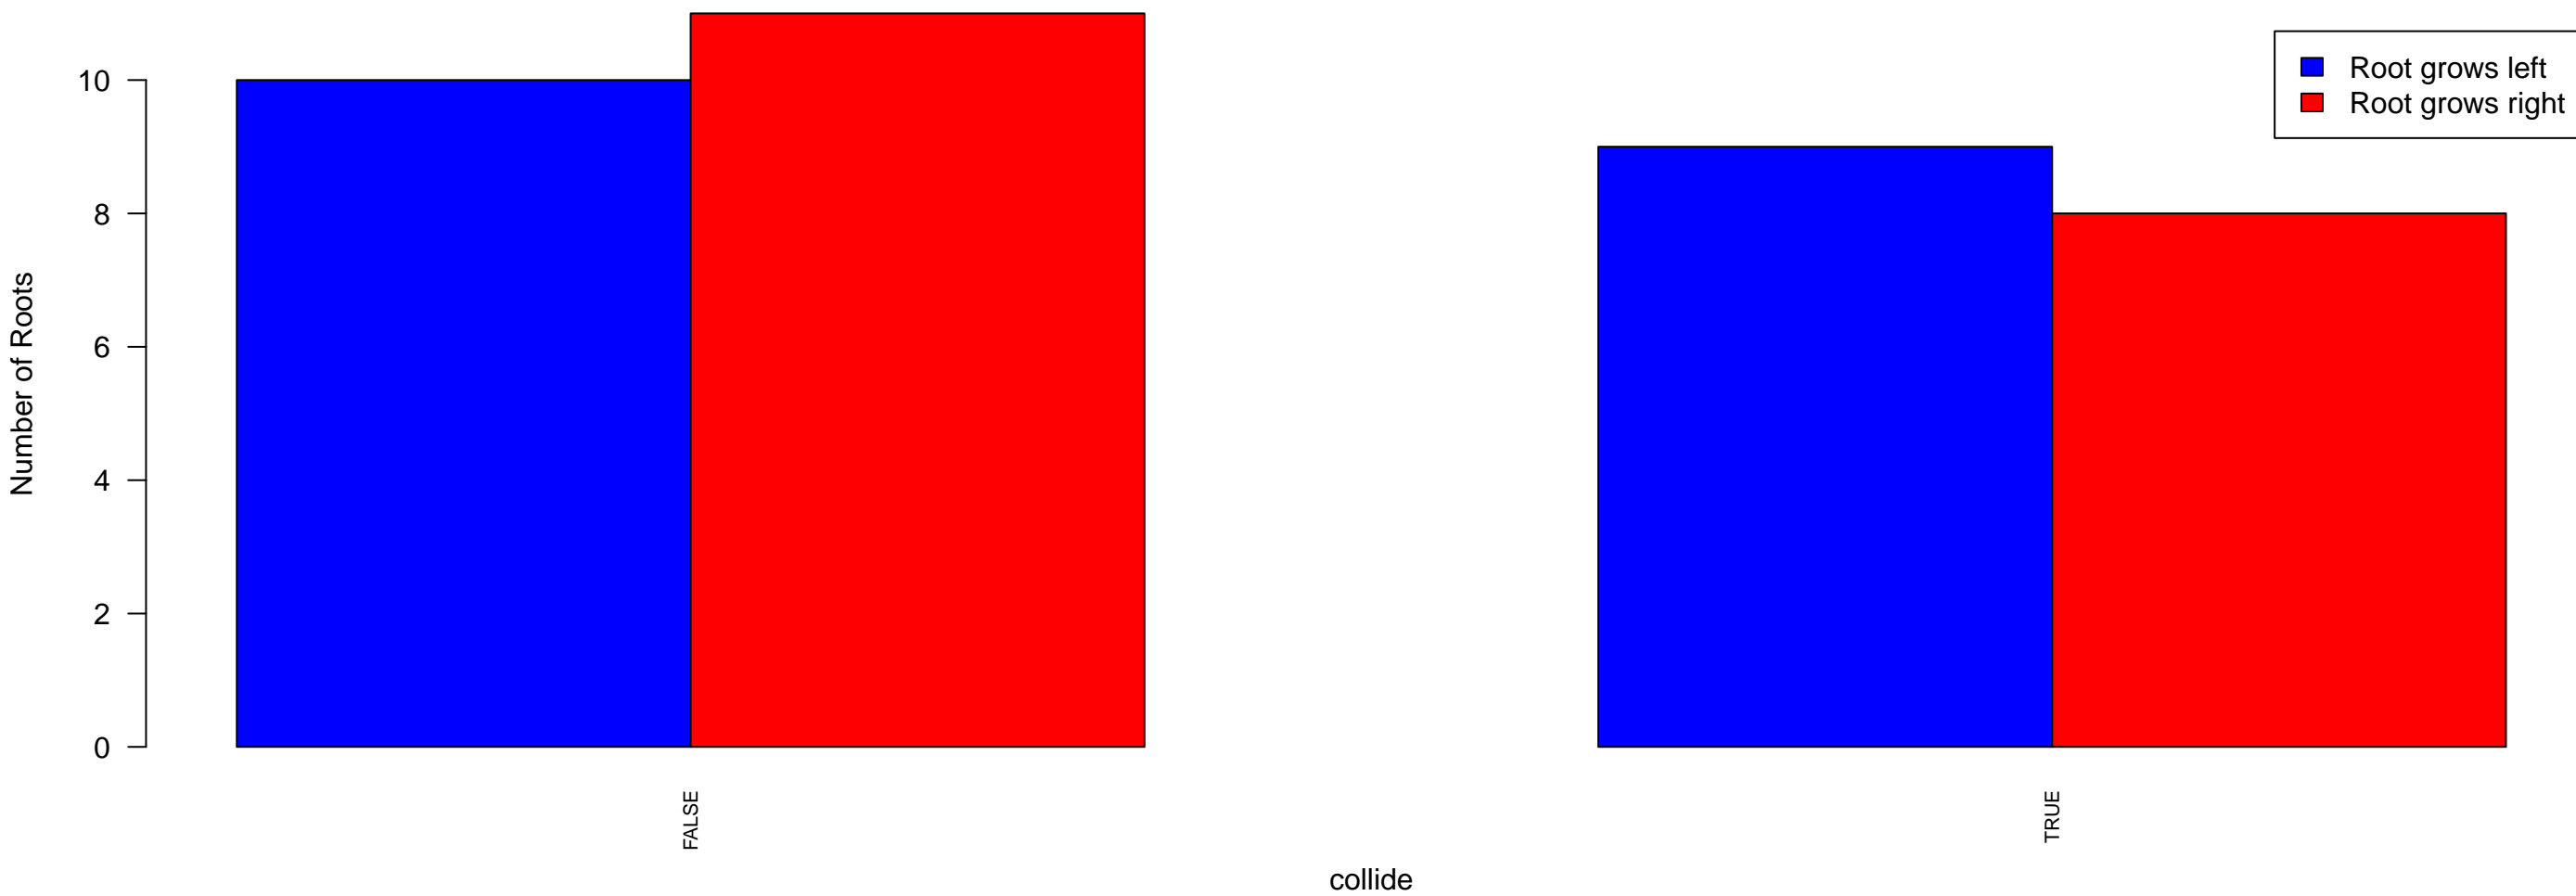

Trait: quarterAngSign Co-variate: along

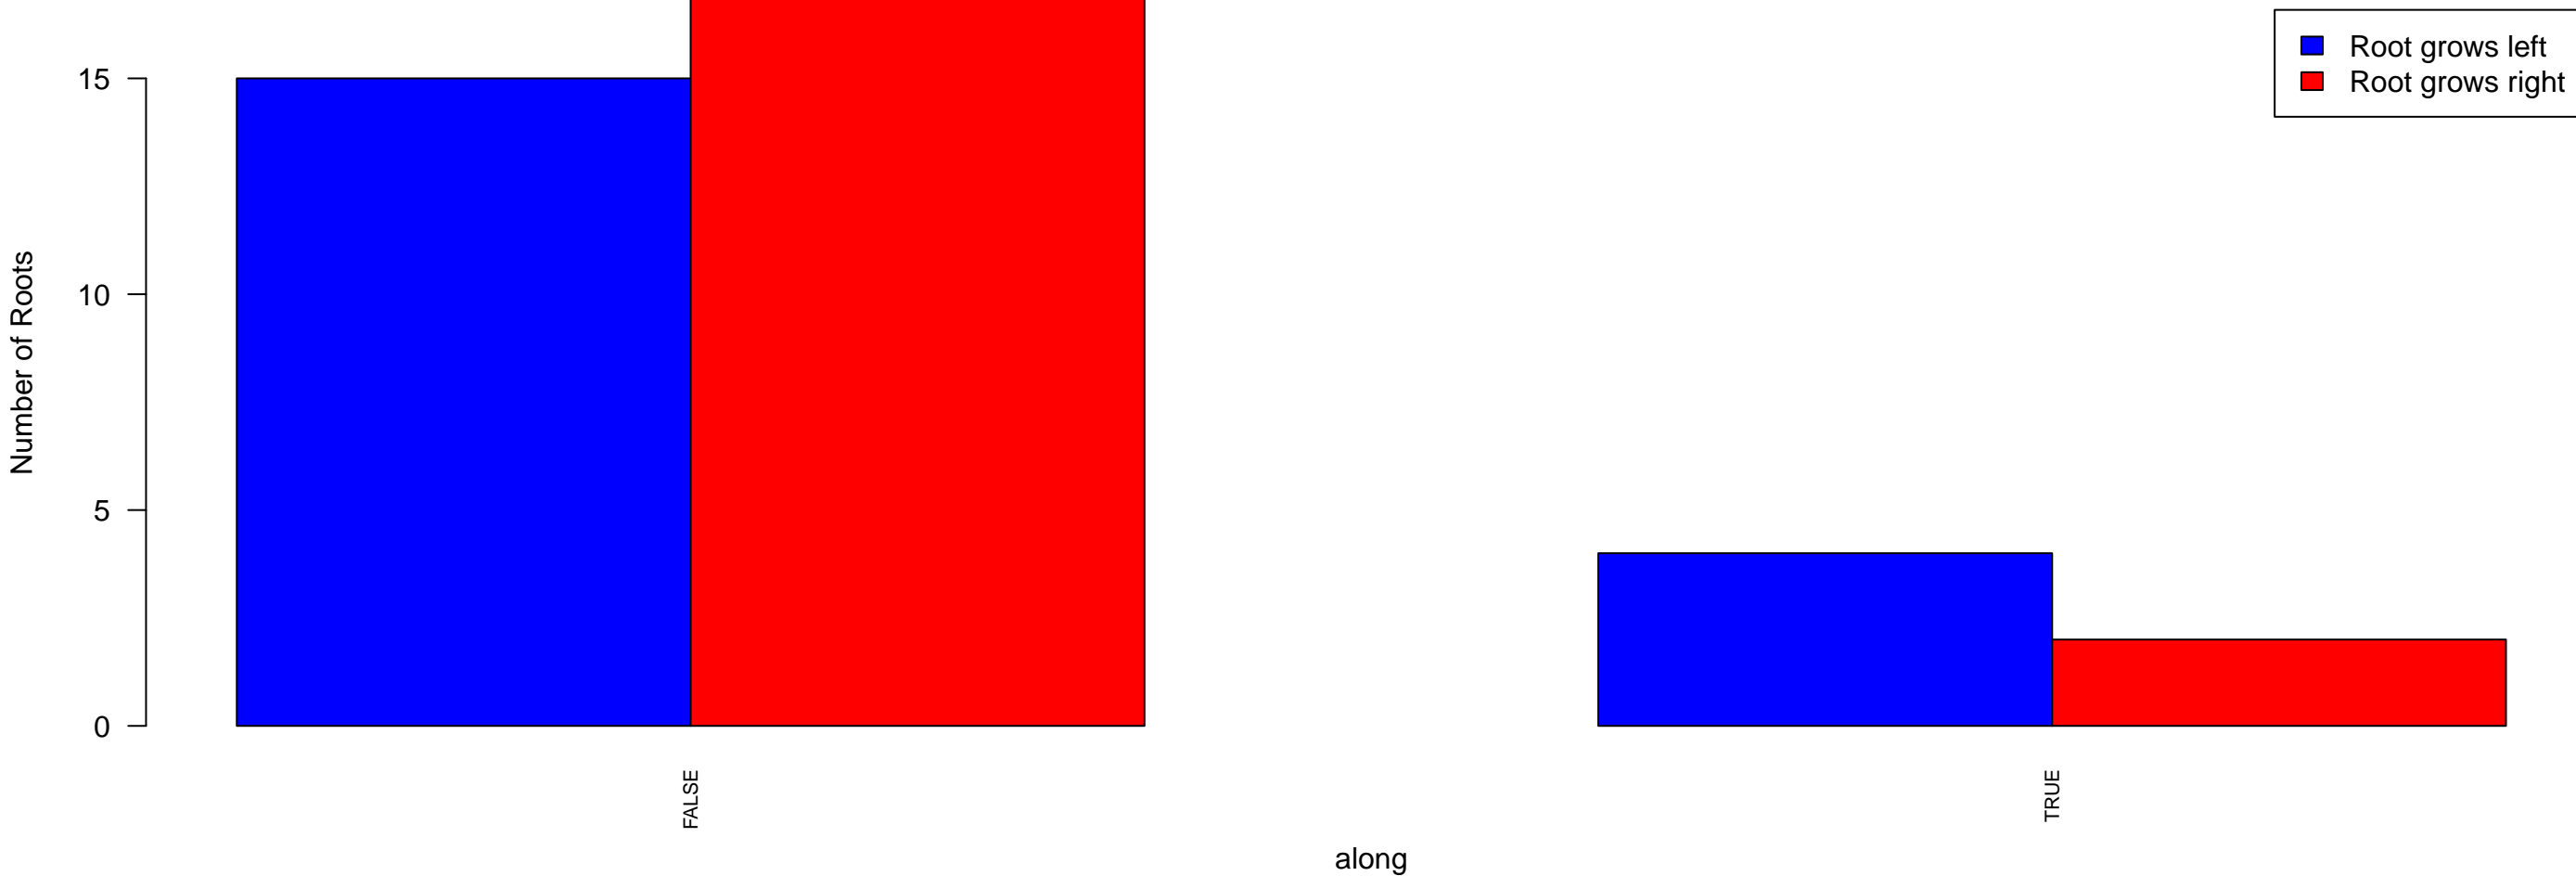

Trait: tenthAngSign Co-variate: genotype



Trait: tenthAngSign Co-variate: experiment

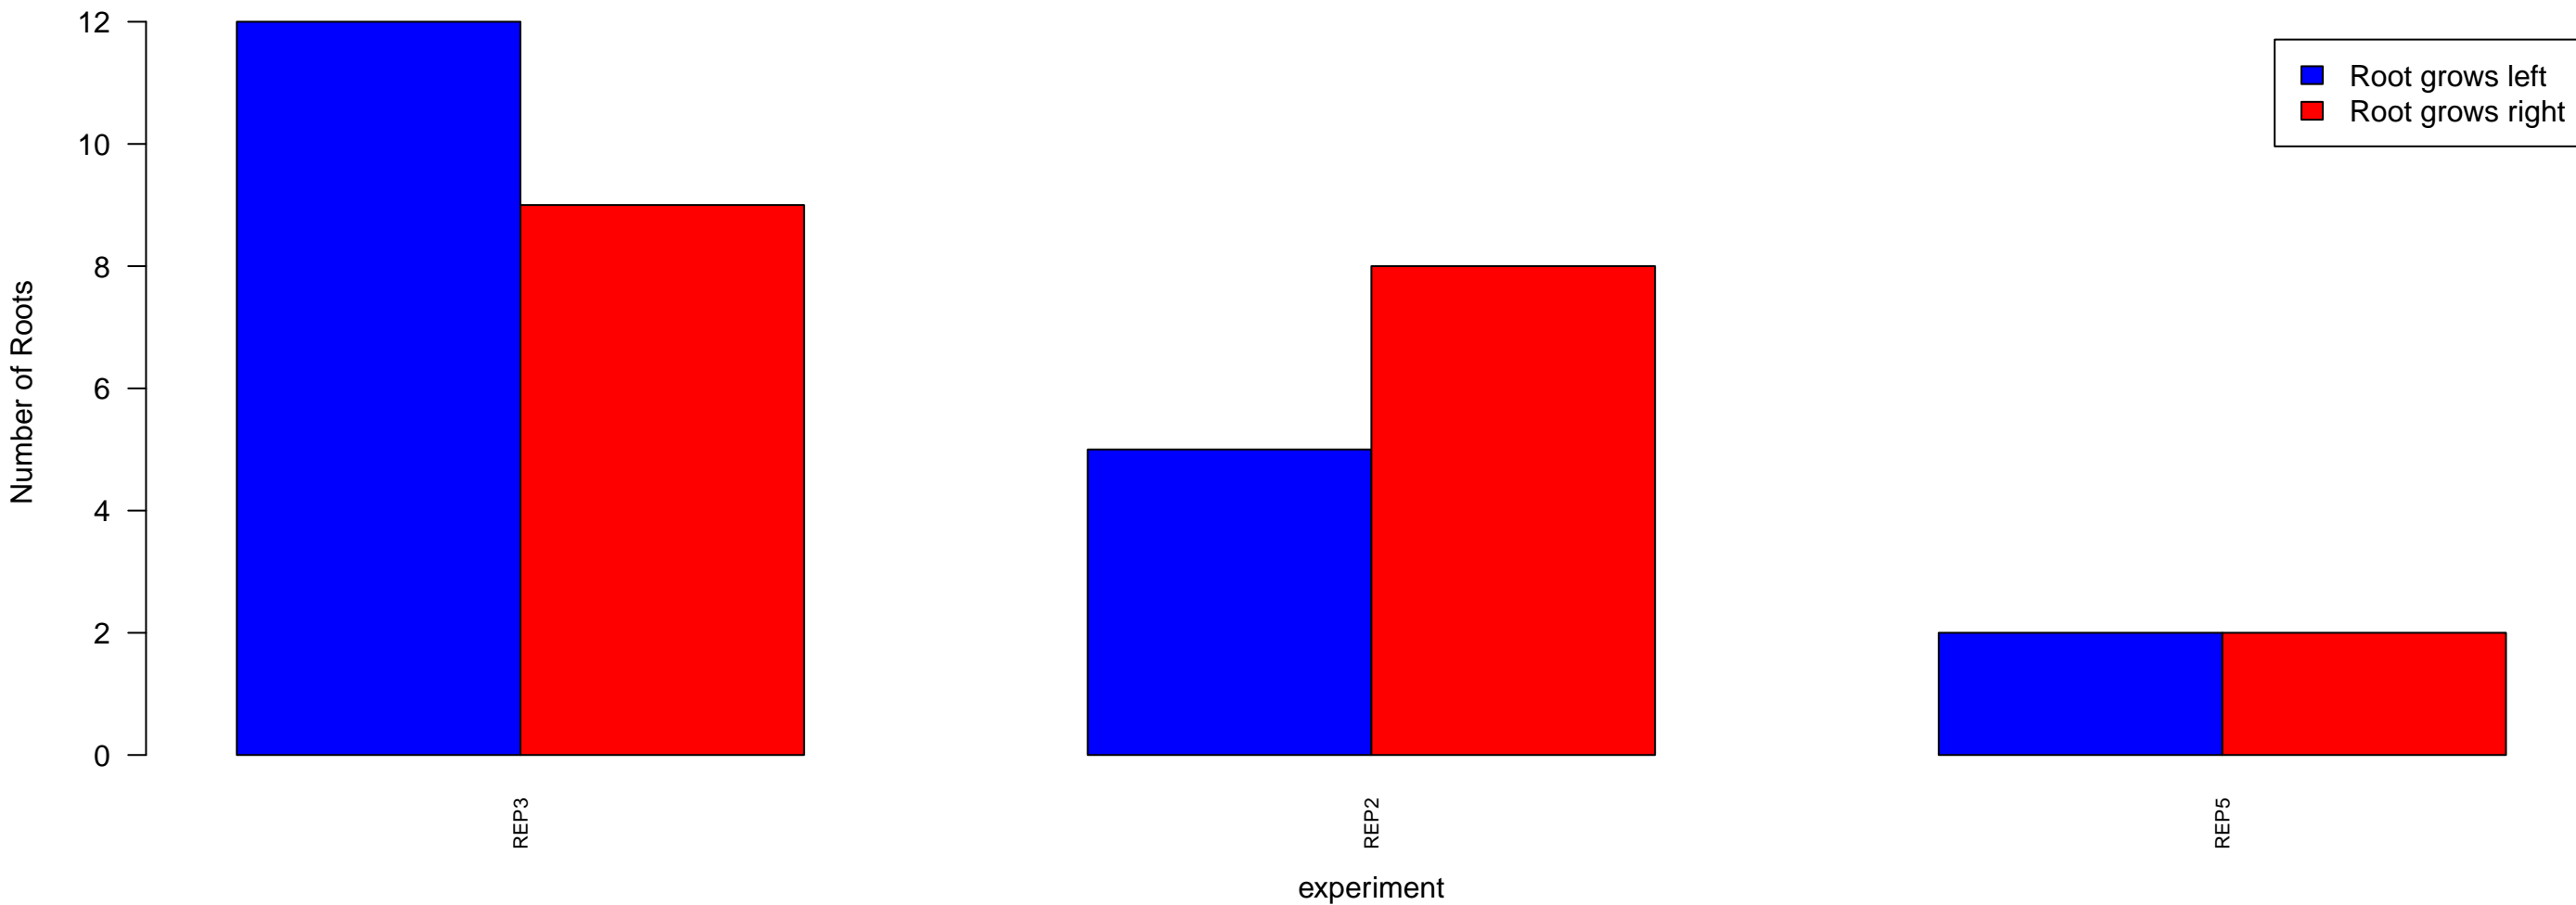



Trait: tenthAngSign Co-variate: germAge



Trait: tenthAngSign Co-variate: rootAge



Trait: tenthAngSign Co-variate: replicate

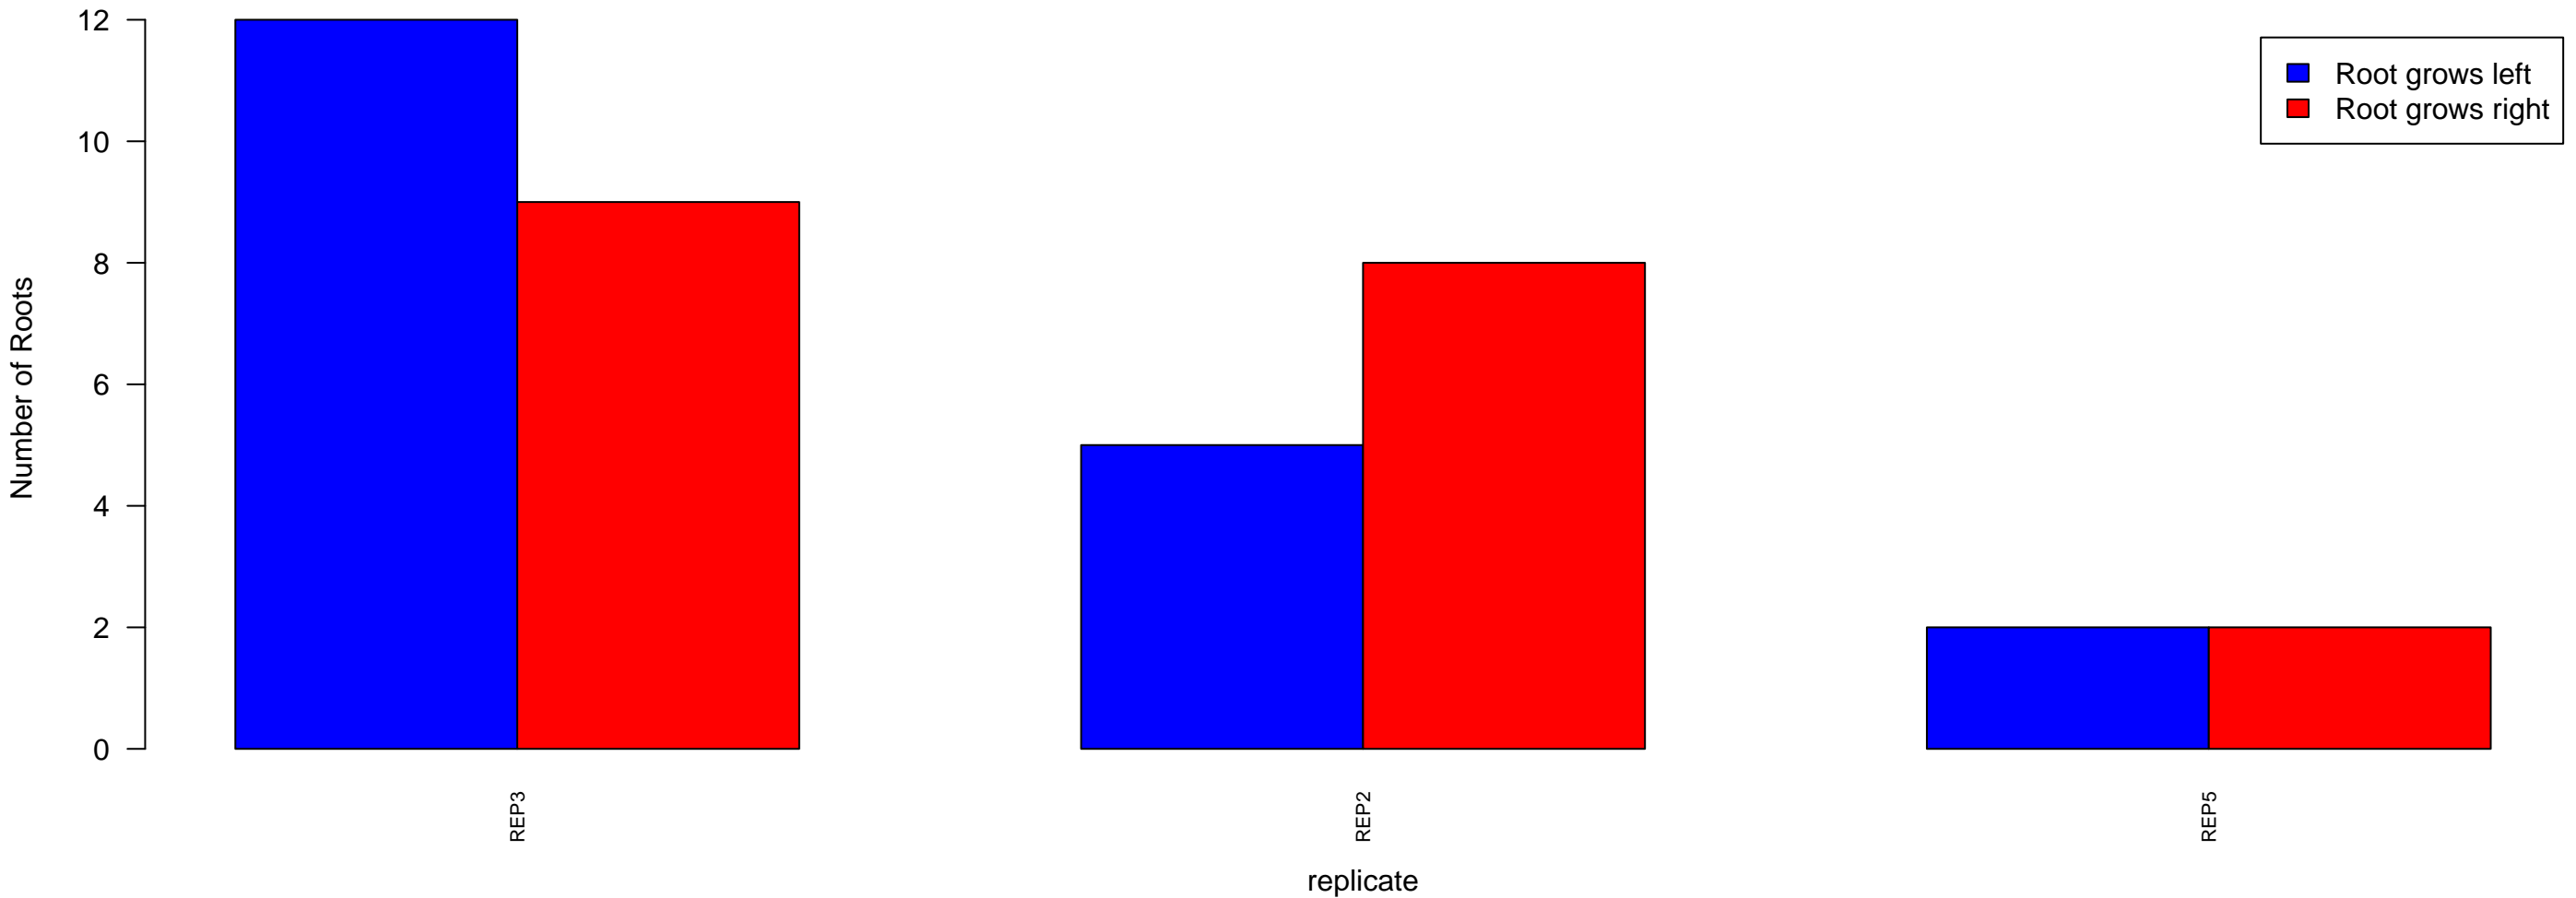

Trait: tenthAngSign Co-variate: collide

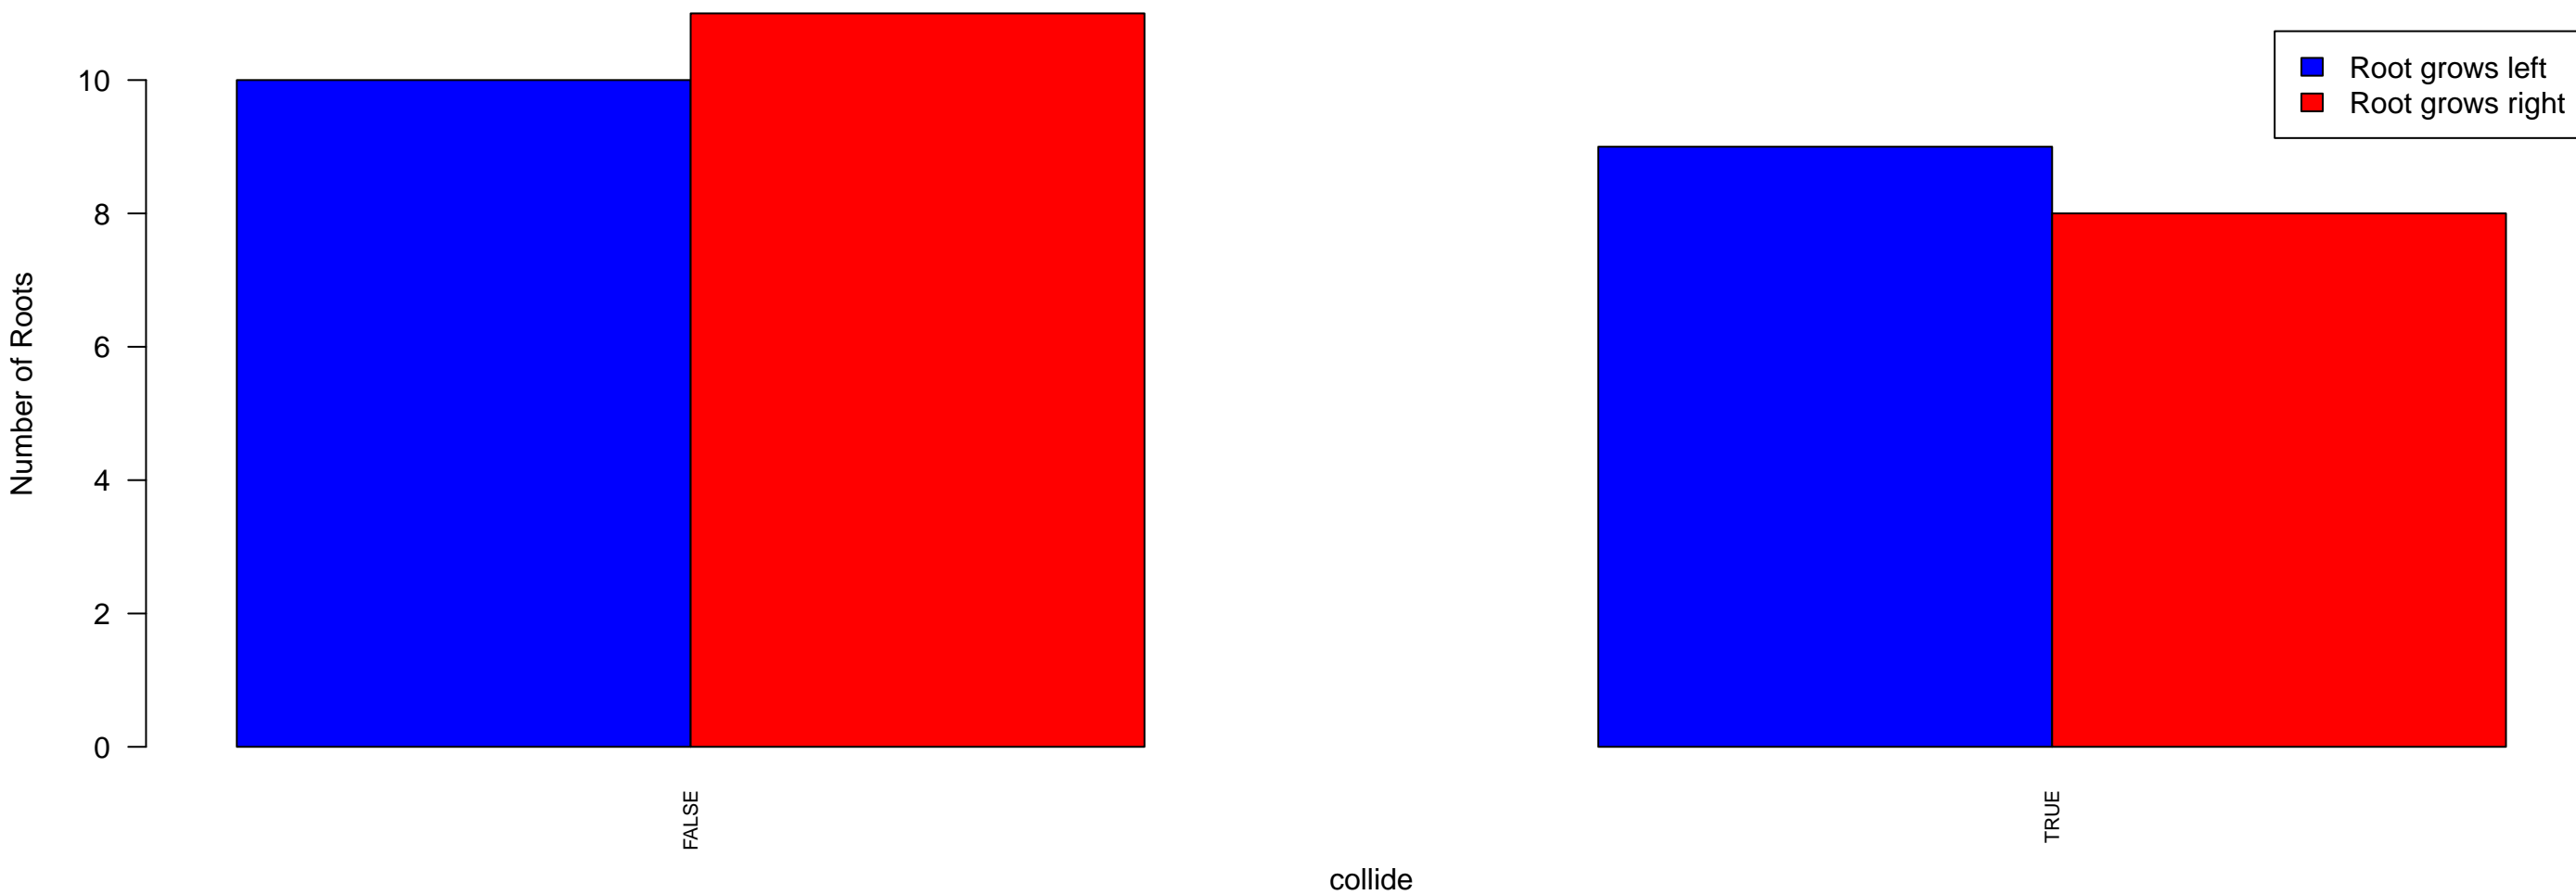

Trait: tenthAngSign Co-variate: along

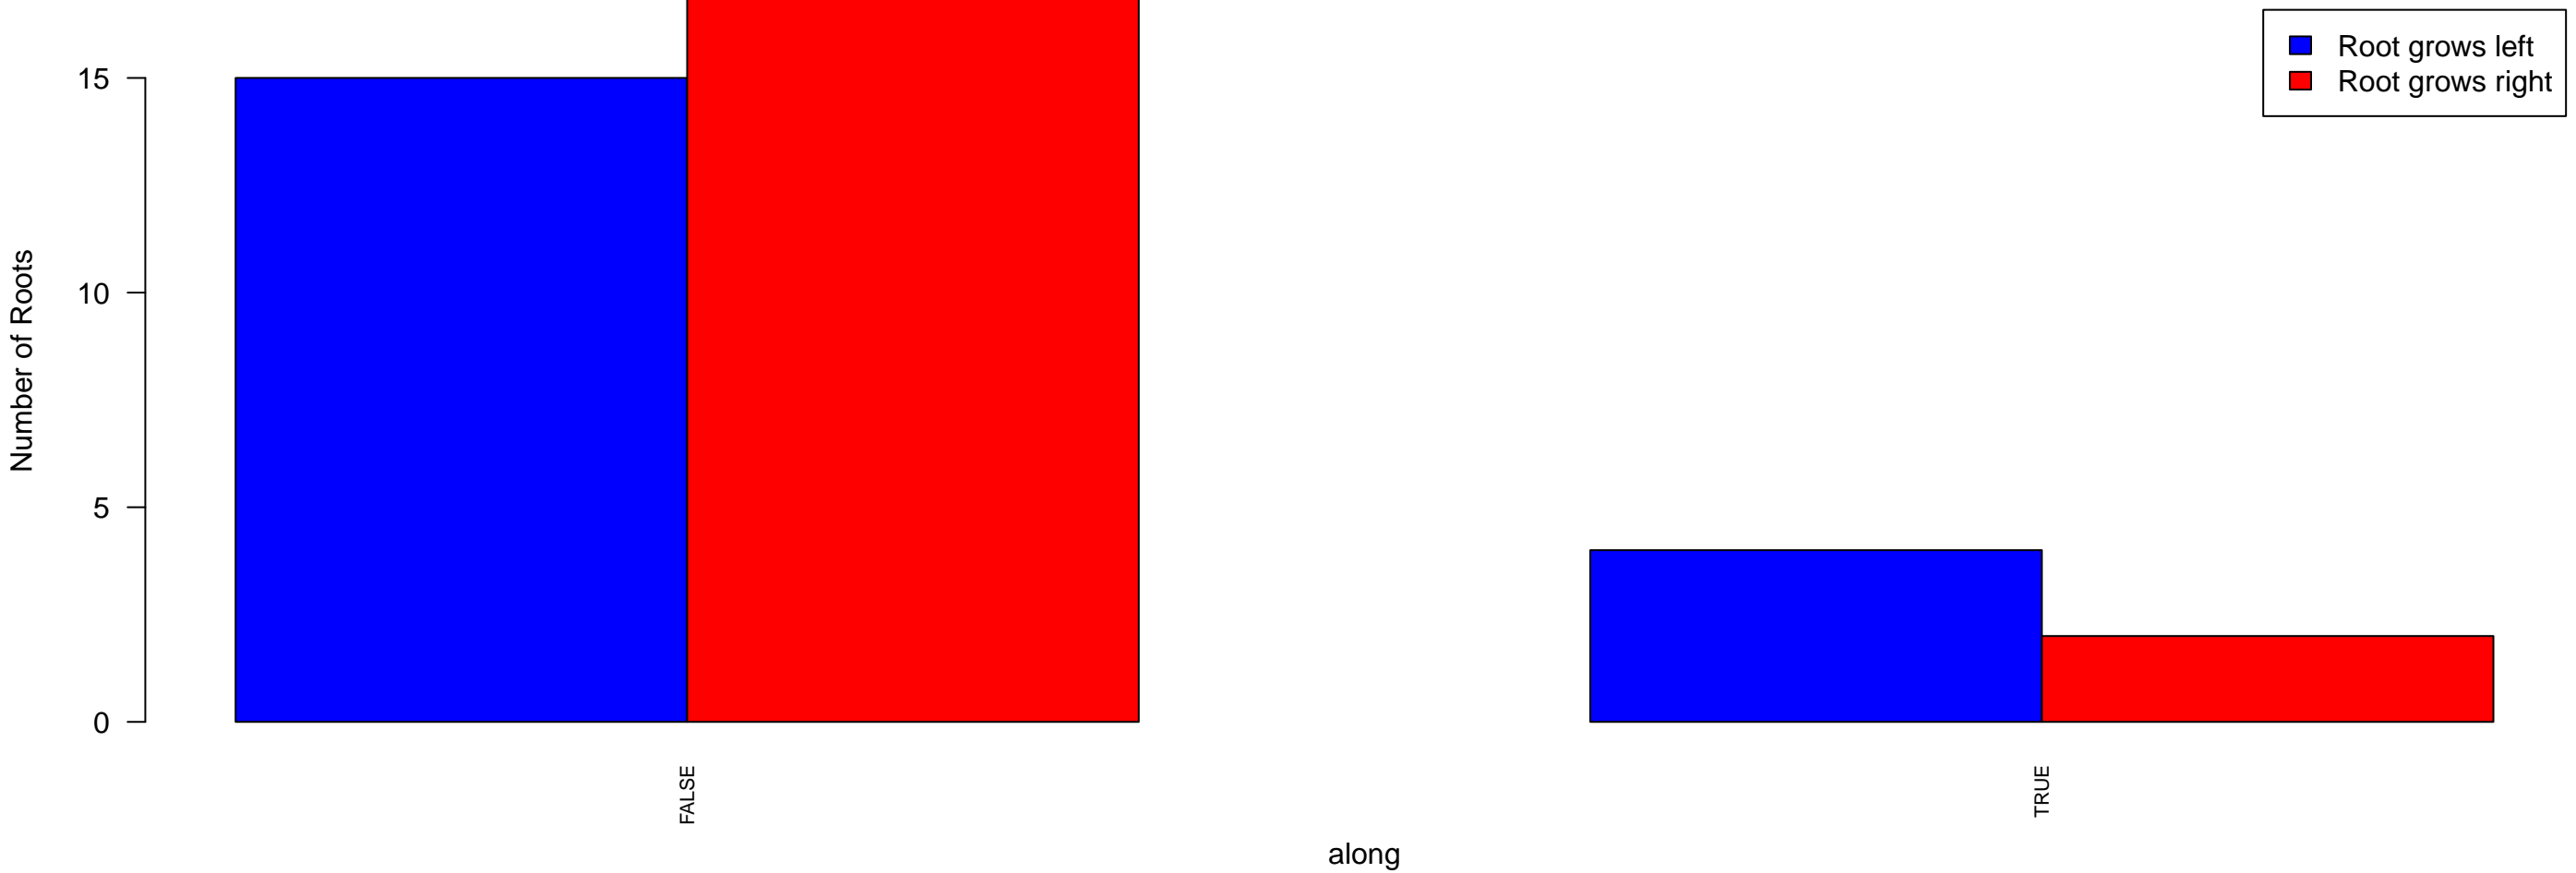

Trait: tipAngSign Co-variate: genotype



Trait: tipAngSign Co-variate: experiment

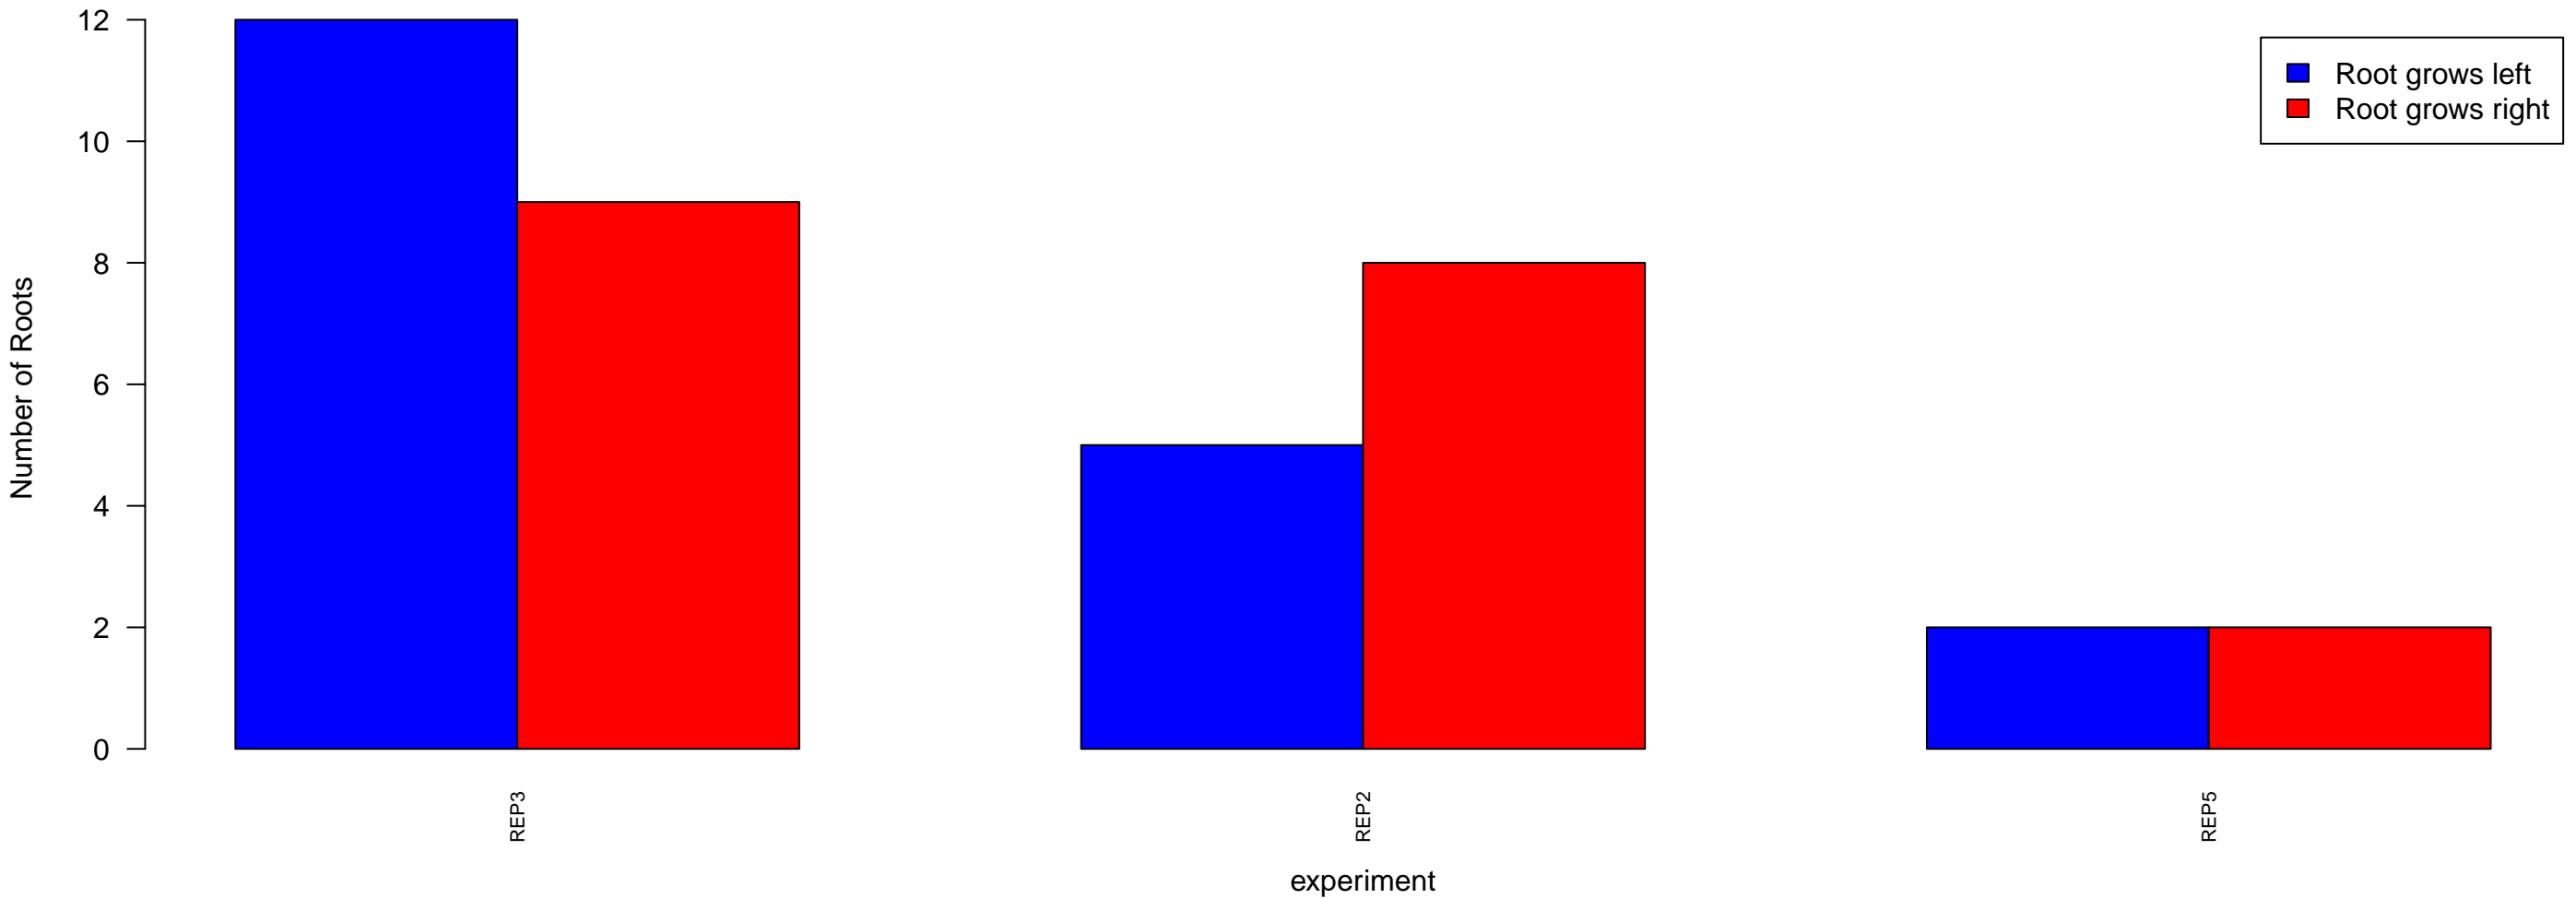

Trait: tipAngSign Co-variate: germAge





Trait: tipAngSign Co-variate: rootAge



Trait: tipAngSign Co-variate: replicate



Trait: tipAngSign Co-variate: collide



Trait: tipAngSign Co-variate: along

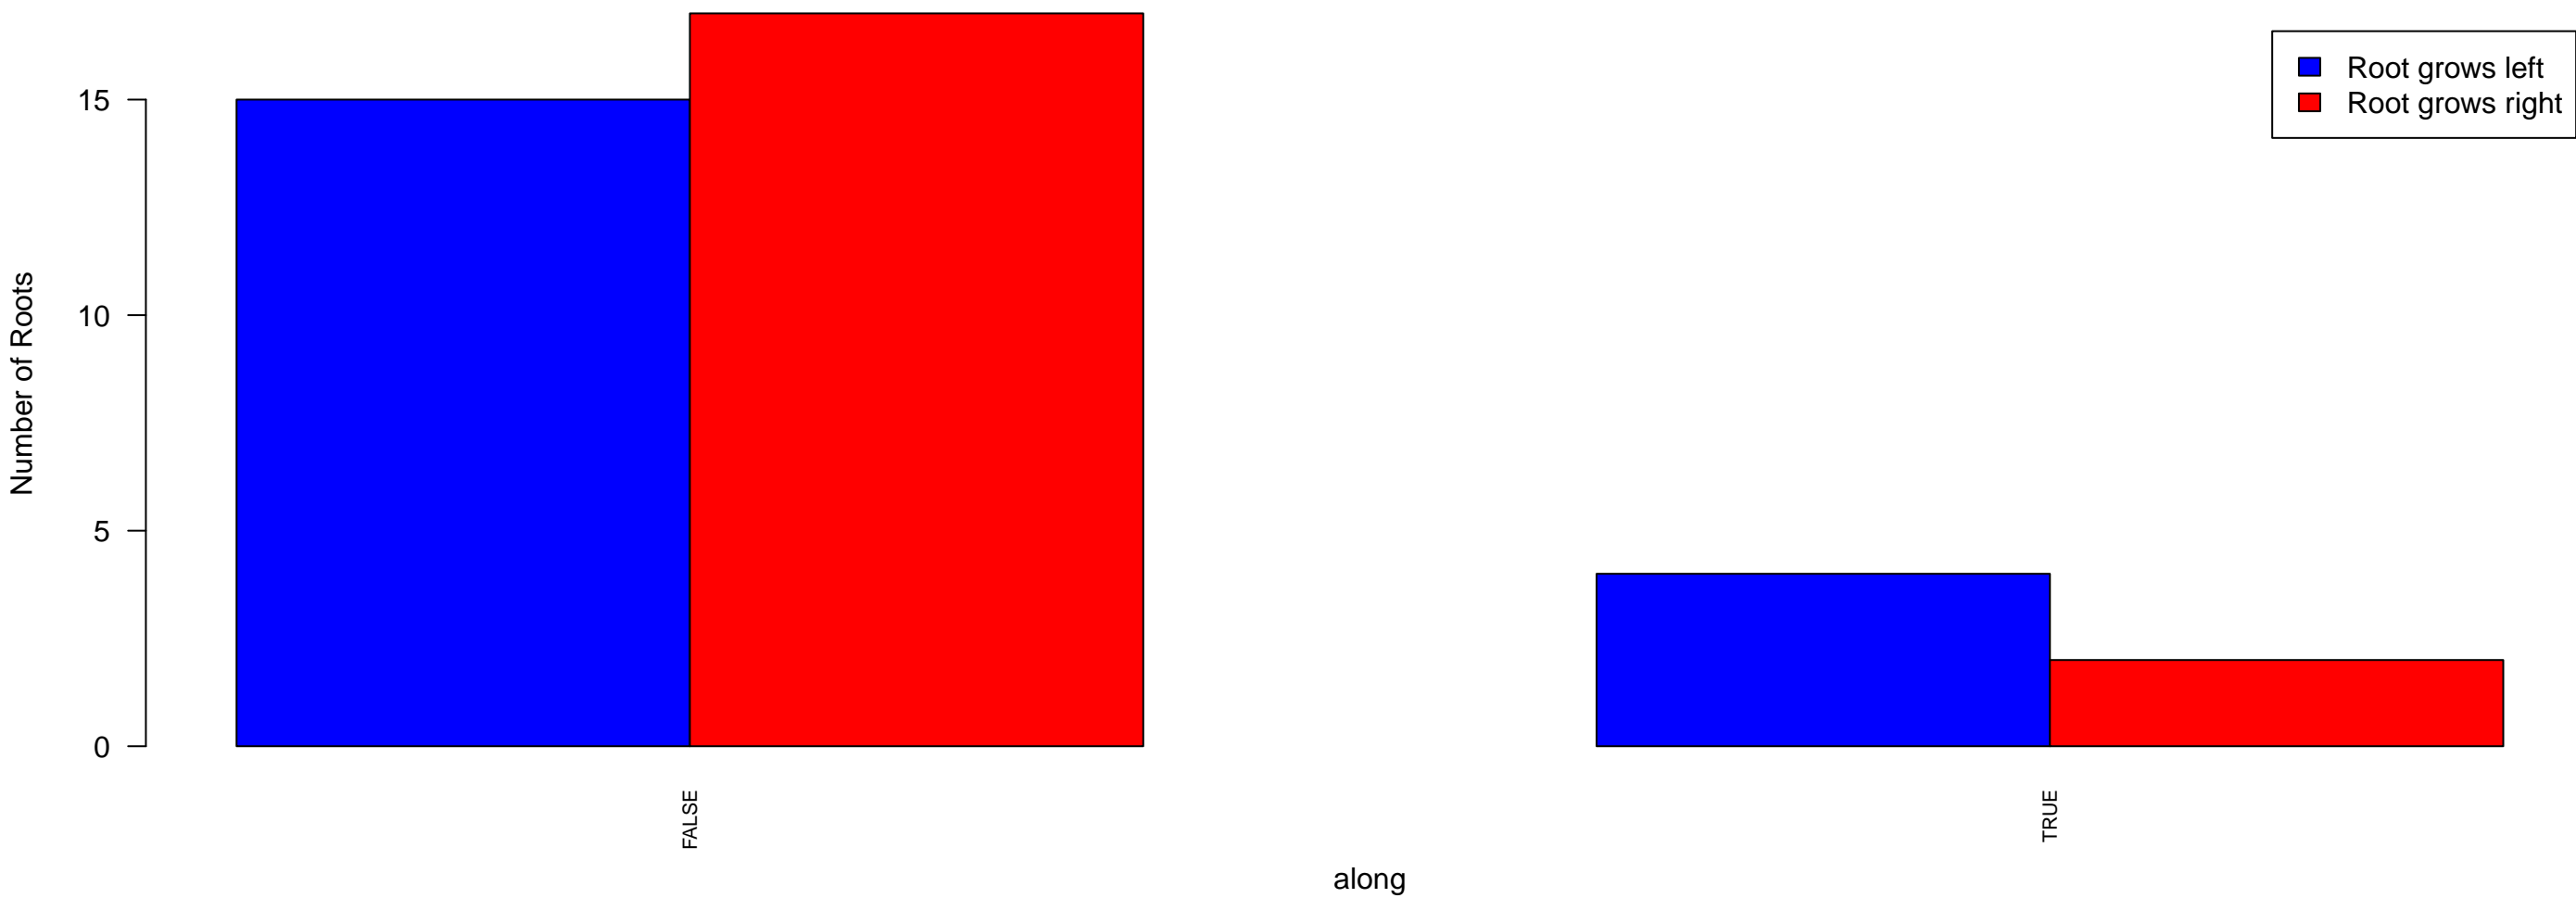

Supplement: Supplementary file 1 [file 2]
