# Supplementary material
Source: publisher figshare collection journal article supplement (https://gsajournals.figshare.com/articles/dataset/_/7237562)

# Angle Away T0

degrees

0  
-10  
-20  
-30  
-40

IL10-1  
IL10-2  
IL10-2-2  
IL10-3  
IL11-1  
IL11-2  
IL11-4  
IL11-4-1  
IL12-1  
IL12-1-1  
IL12-2  
IL12-3  
IL12-3-1  
IL12-4  
IL12-4-1  
IL1-1-2  
IL1-3  
IL1-4  
IL1-4-18  
IL2-1  
IL2-1-1  
IL2-2  
IL2-4  
IL2-6-5  
IL3-5  
IL4-1  
IL4-1-1  
IL4-3  
IL4-3-2  
IL4-4  
IL5-1  
IL5-2  
IL5-5  
IL6-1  
IL6-2  
IL6-4  
IL7-1  
IL7-3  
IL7-4  
IL7-4-1  
IL7-5  
IL7-5-1  
IL7-5-5  
IL8-1  
IL8-1-1  
IL8-1-5  
IL8-3  
IL9-1  
IL9-1-2  
IL9-2  
IL9-2-6  
IL9-3-1  
M82  
IL7-5-P5  
PENN

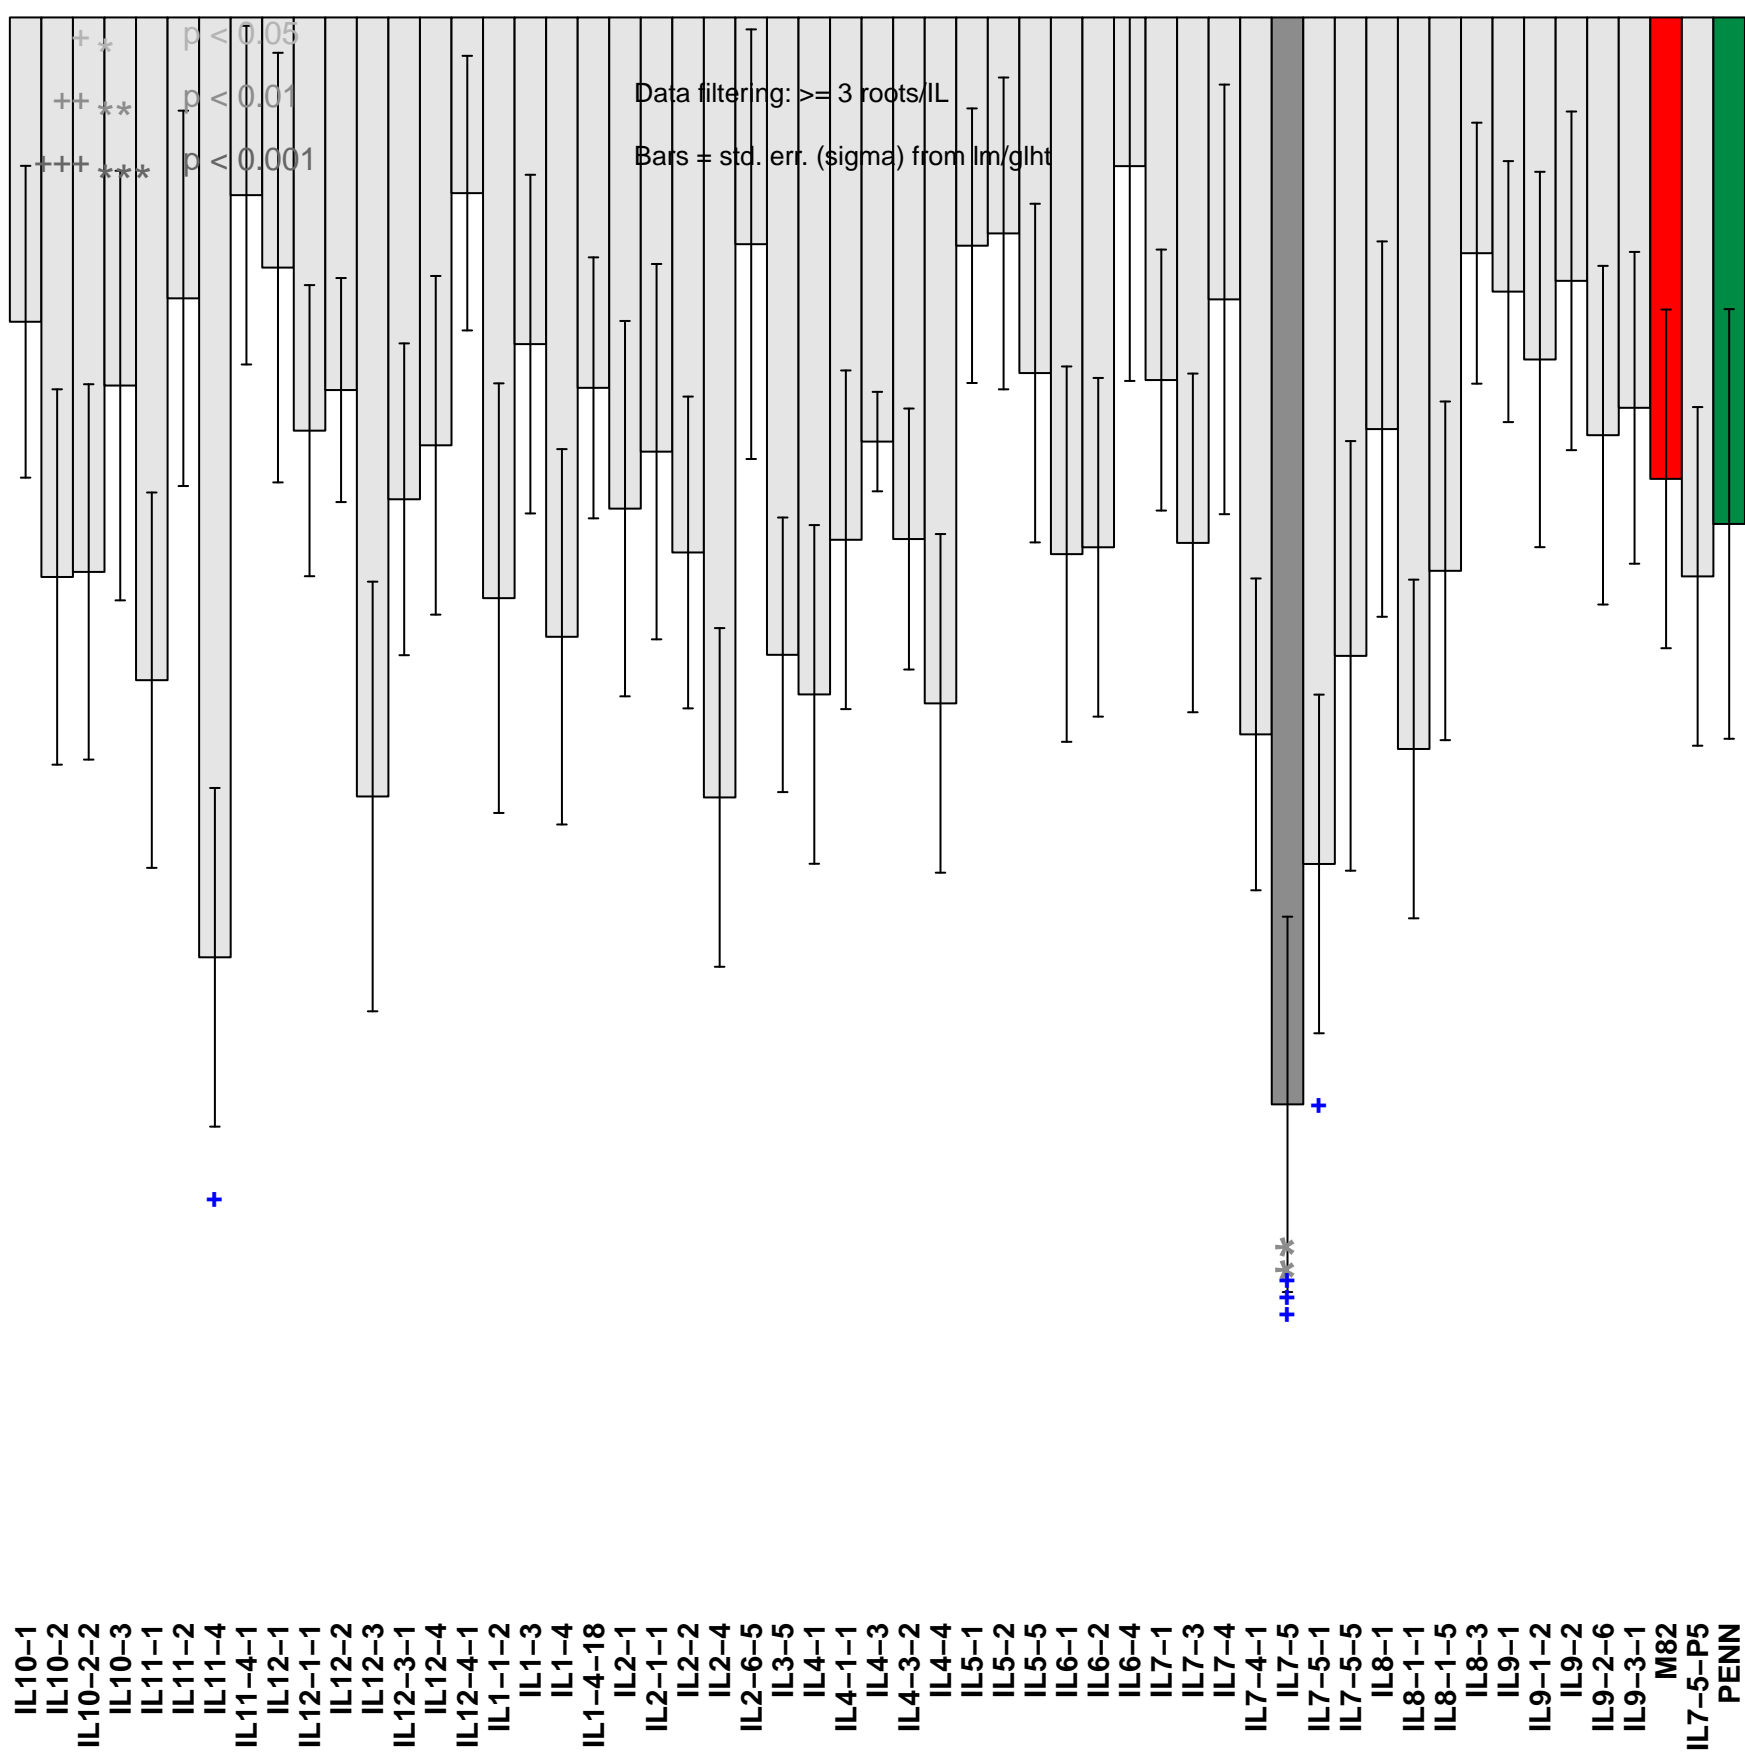

# Angle Away T1

degrees

0  
-10  
-20  
-30  
-40

IL10-1  
IL10-2  
IL10-2-2  
IL10-3  
IL11-1  
IL11-2  
IL11-4  
IL11-4-1  
IL12-1  
IL12-1-1  
IL12-2  
IL12-3  
IL12-3-1  
IL12-4  
IL12-4-1  
IL1-1-2  
IL1-3  
IL1-4  
IL1-4-18  
IL2-1  
IL2-1-1  
IL2-2  
IL2-4  
IL2-6-5  
IL3-5  
IL4-1  
IL4-1-1  
IL4-3  
IL4-3-2  
IL4-4  
IL5-1  
IL5-2  
IL5-5  
IL6-1  
IL6-2  
IL6-4  
IL7-1  
IL7-3  
IL7-4  
IL7-4-1  
IL7-5  
IL7-5-1  
IL7-5-5  
IL8-1  
IL8-1-1  
IL8-1-5  
IL8-3  
IL9-1  
IL9-1-2  
IL9-2  
IL9-2-6  
IL9-3-1  
M82  
IL7-5-P5  
PENN

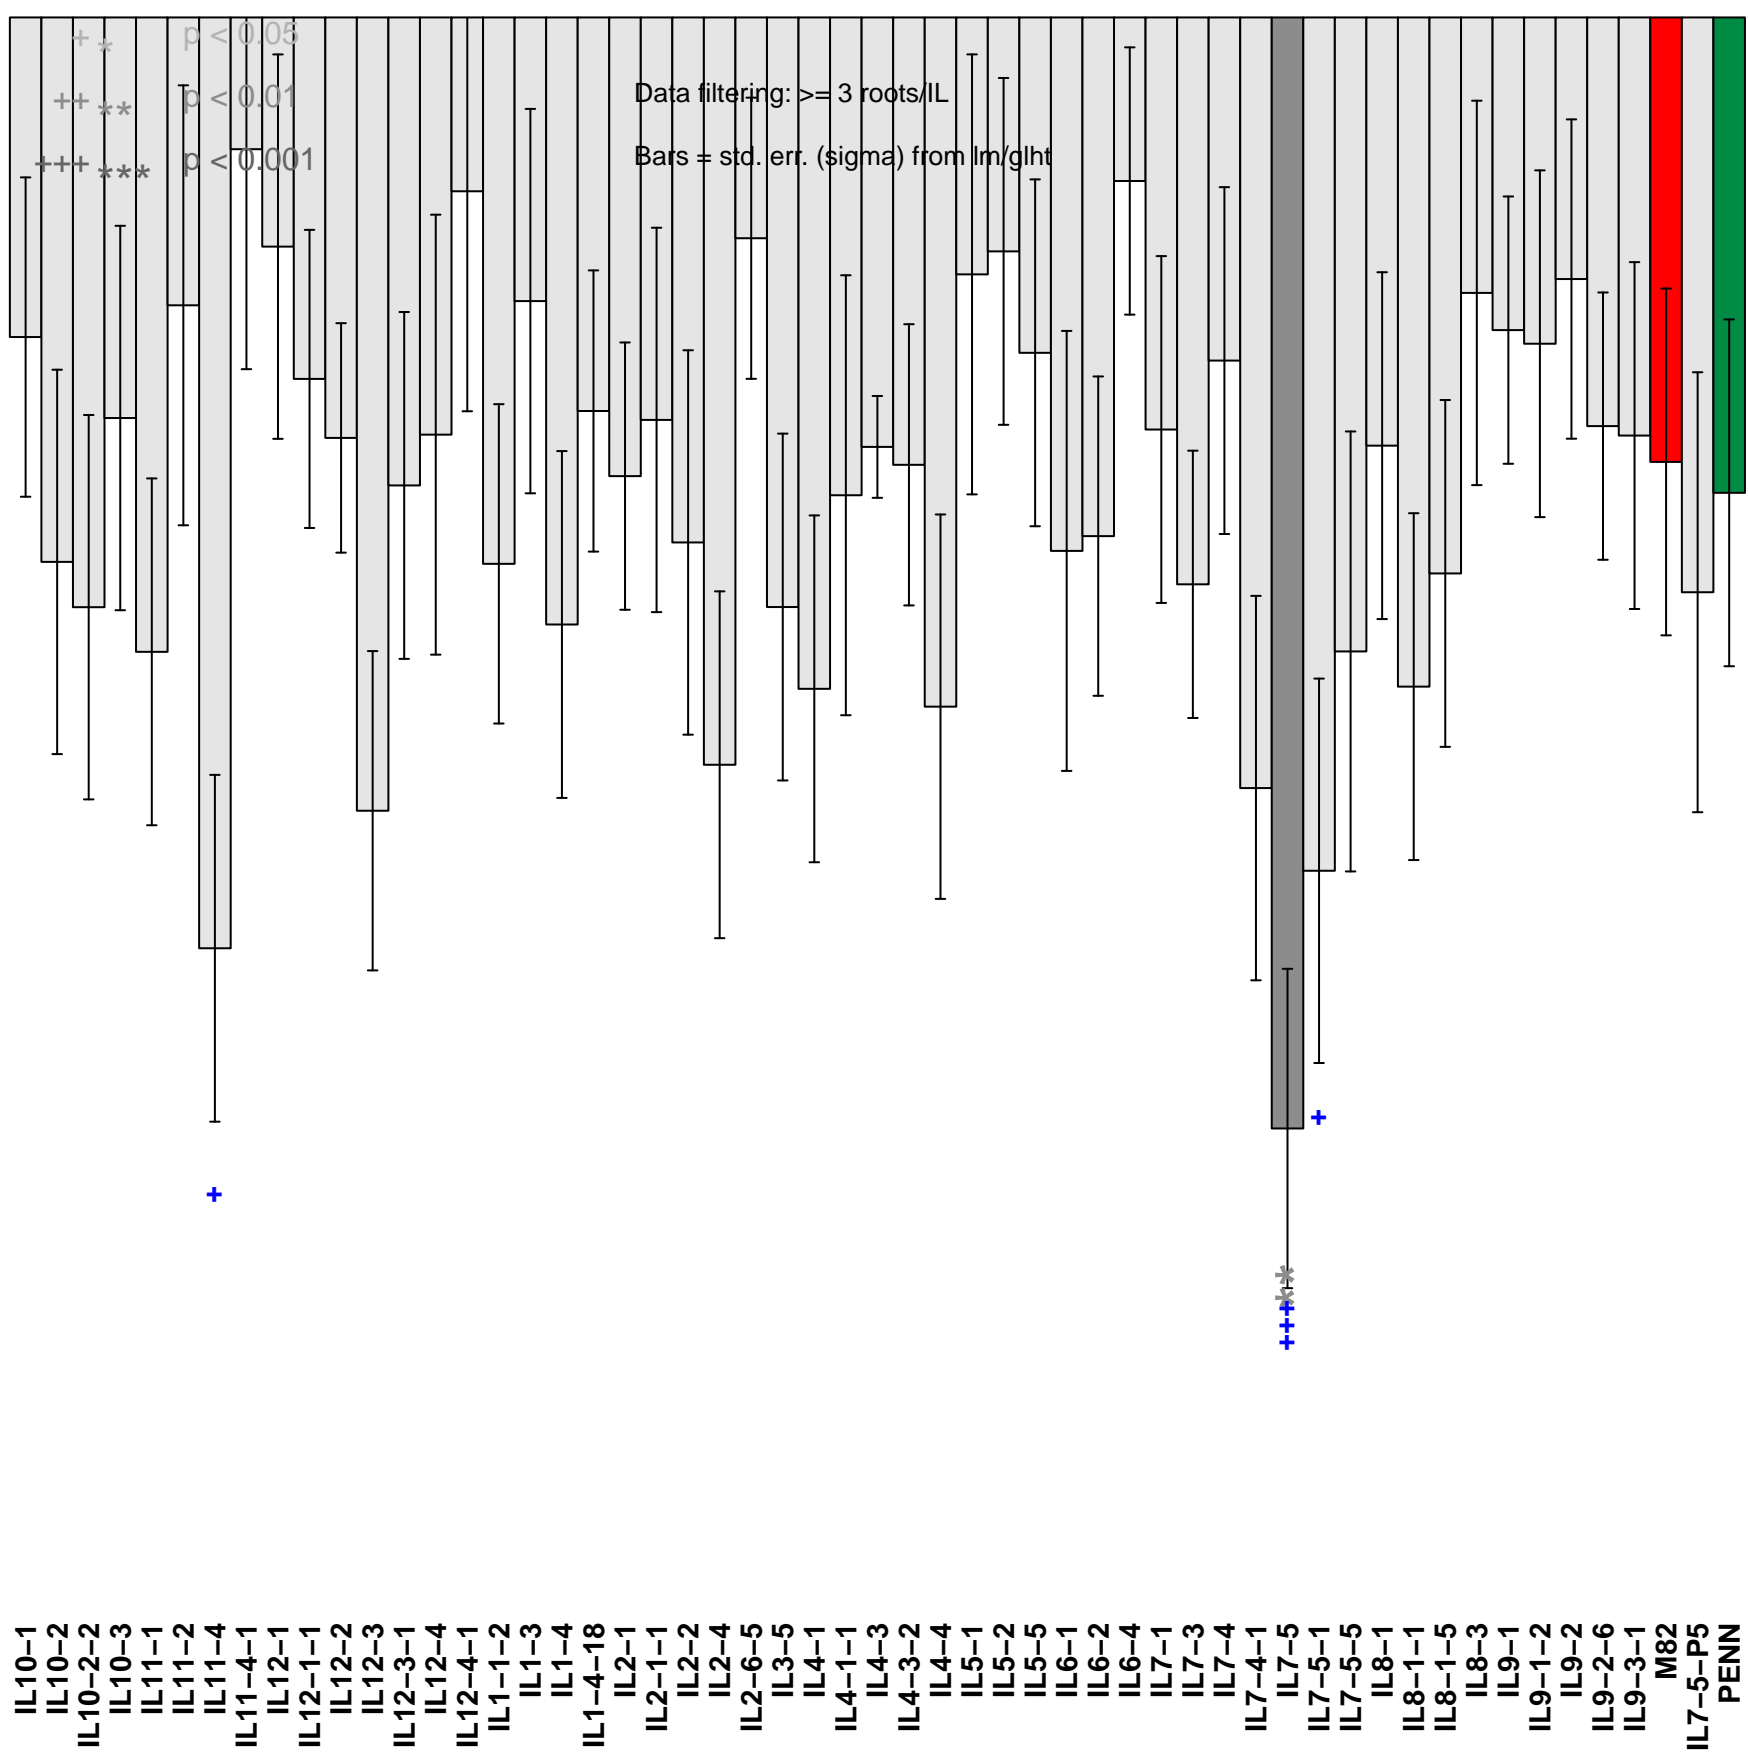

# Angle Away T2

degrees

0  
-10  
-20  
-30  
-40

IL10-1  
IL10-2  
IL10-2-2  
IL10-3  
IL11-1  
IL11-2  
IL11-4  
IL11-4-1  
IL12-1  
IL12-1-1  
IL12-2  
IL12-3  
IL12-3-1  
IL12-4  
IL12-4-1  
IL1-1-2  
IL1-3  
IL1-4  
IL1-4-18  
IL2-1  
IL2-1-1  
IL2-2  
IL2-4  
IL2-6-5  
IL3-5  
IL4-1  
IL4-1-1  
IL4-3  
IL4-3-2  
IL4-4  
IL5-1  
IL5-2  
IL5-5  
IL6-1  
IL6-2  
IL6-4  
IL7-1  
IL7-3  
IL7-4  
IL7-4-1  
IL7-5  
IL7-5-1  
IL7-5-5  
IL8-1  
IL8-1-1  
IL8-1-5  
IL8-3  
IL9-1  
IL9-1-2  
IL9-2  
IL9-2-6  
IL9-3-1  
M82  
IL7-5-P5  
PENN

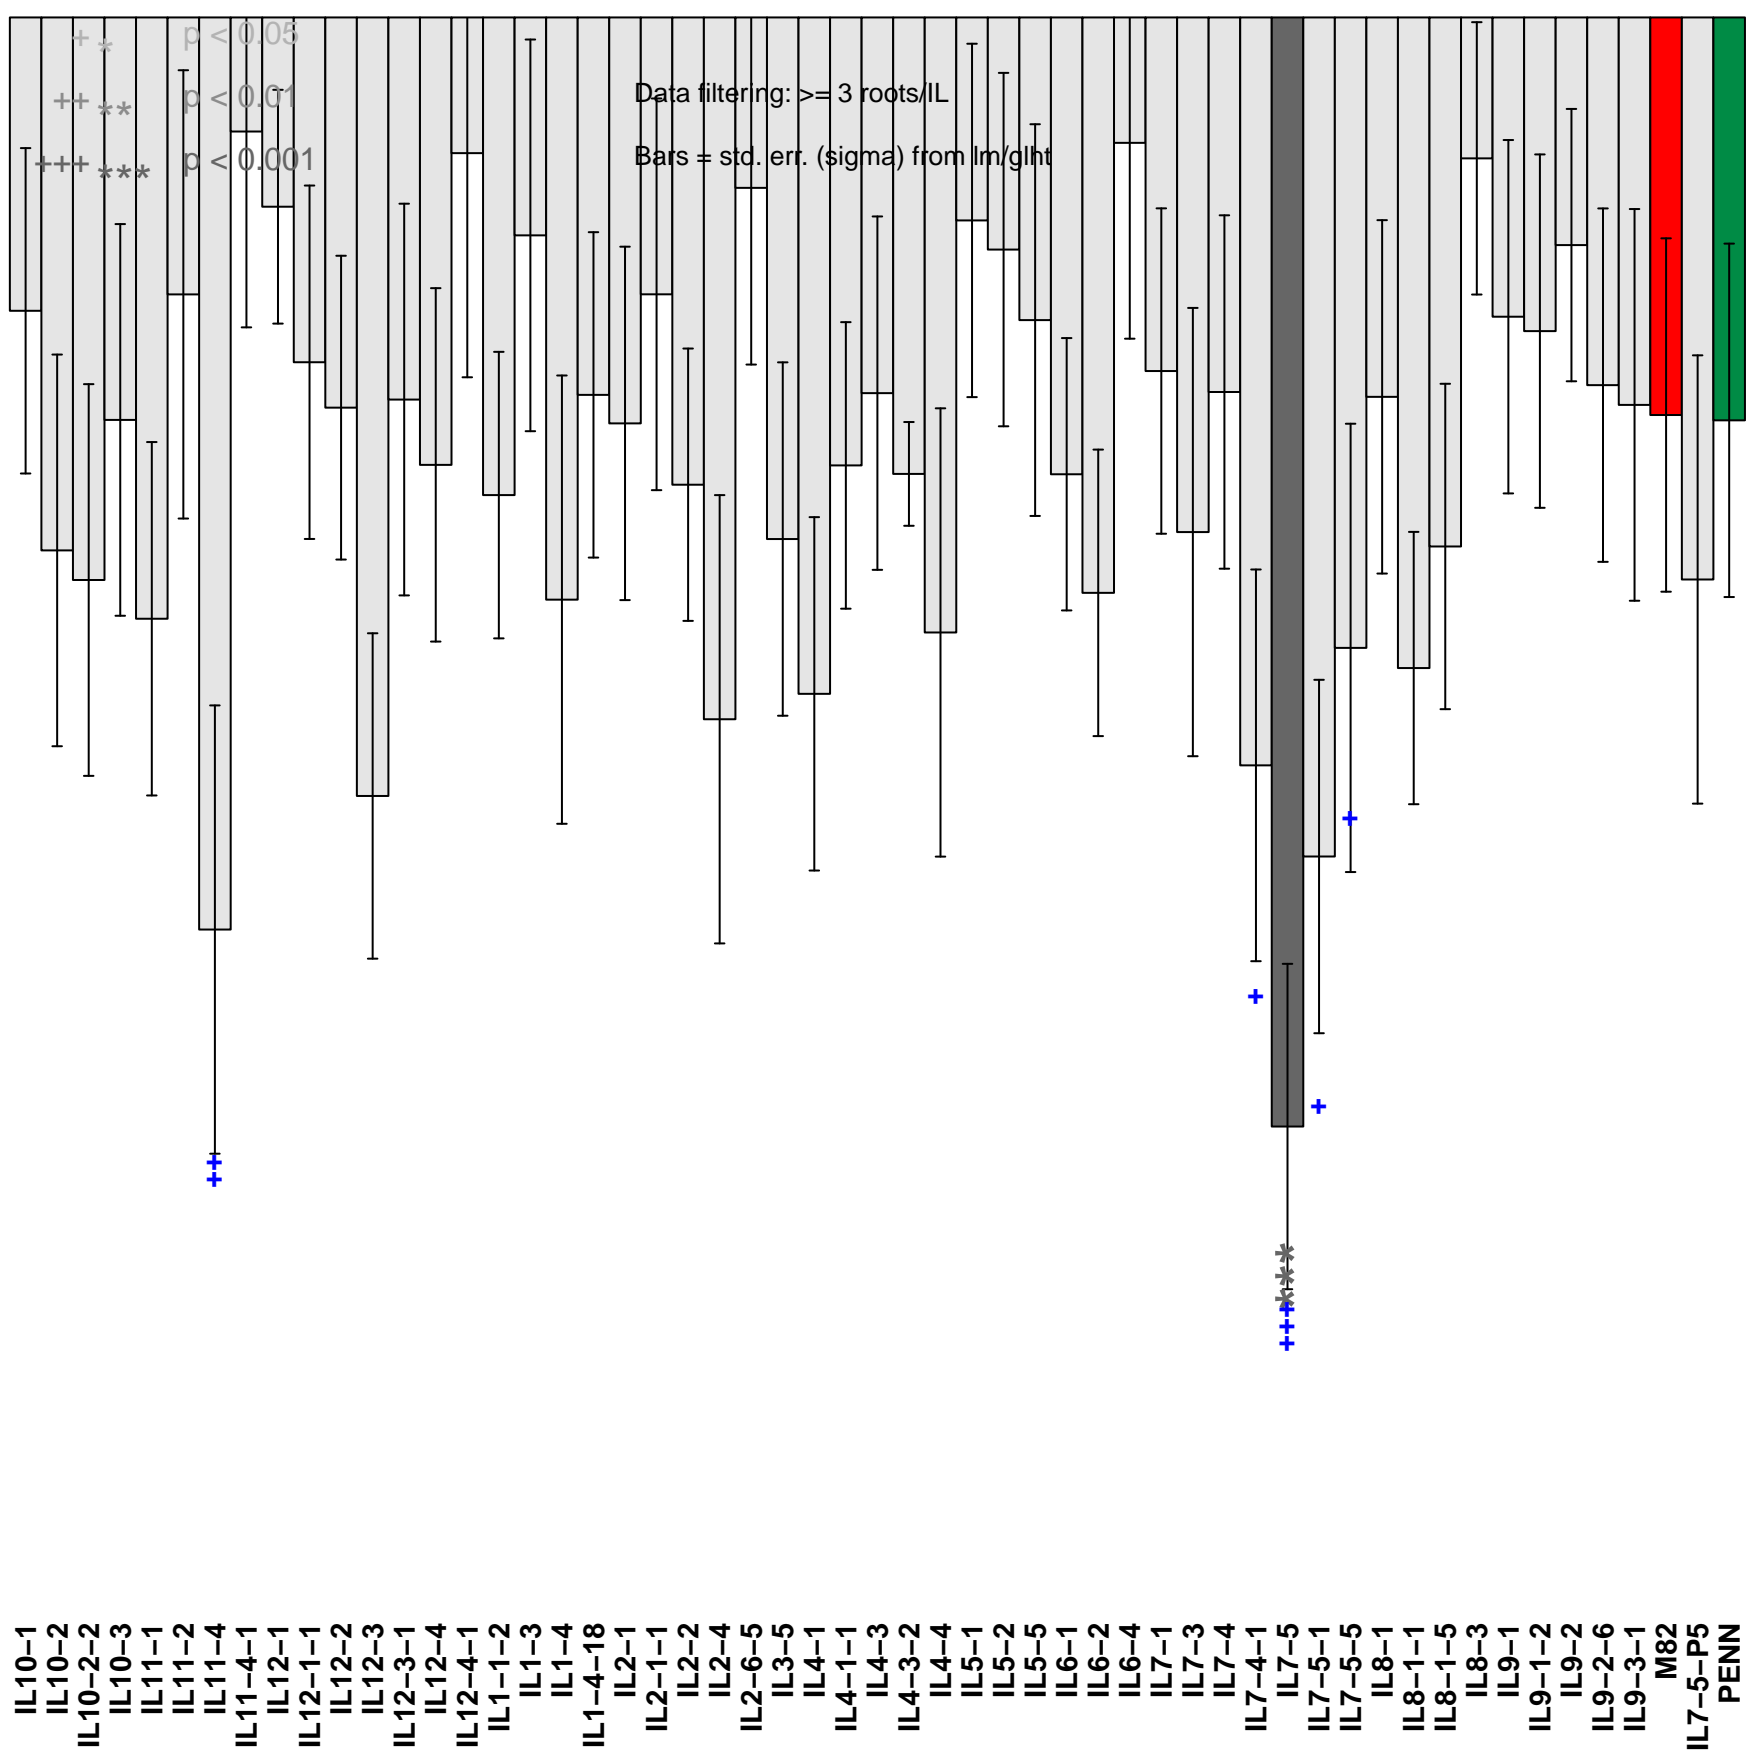

# Angle Away T3

degrees

0  
-10  
-20  
-30  
-40

IL10-1  
IL10-2  
IL10-2-2  
IL10-3  
IL11-1  
IL11-2  
IL11-4  
IL11-4-1  
IL12-1  
IL12-1-1  
IL12-2  
IL12-3  
IL12-3-1  
IL12-4  
IL12-4-1  
IL1-1-2  
IL1-3  
IL1-4  
IL1-4-18  
IL2-1  
IL2-1-1  
IL2-2  
IL2-4  
IL2-6-5  
IL3-5  
IL4-1  
IL4-1-1  
IL4-3  
IL4-3-2  
IL4-4  
IL5-1  
IL5-2  
IL5-5  
IL6-1  
IL6-2  
IL6-4  
IL7-1  
IL7-3  
IL7-4  
IL7-4-1  
IL7-5  
IL7-5-1  
IL7-5-5  
IL8-1  
IL8-1-1  
IL8-1-5  
IL8-3  
IL9-1  
IL9-1-2  
IL9-2  
IL9-2-6  
IL9-3-1  
M82  
IL7-5-P5  
PENN

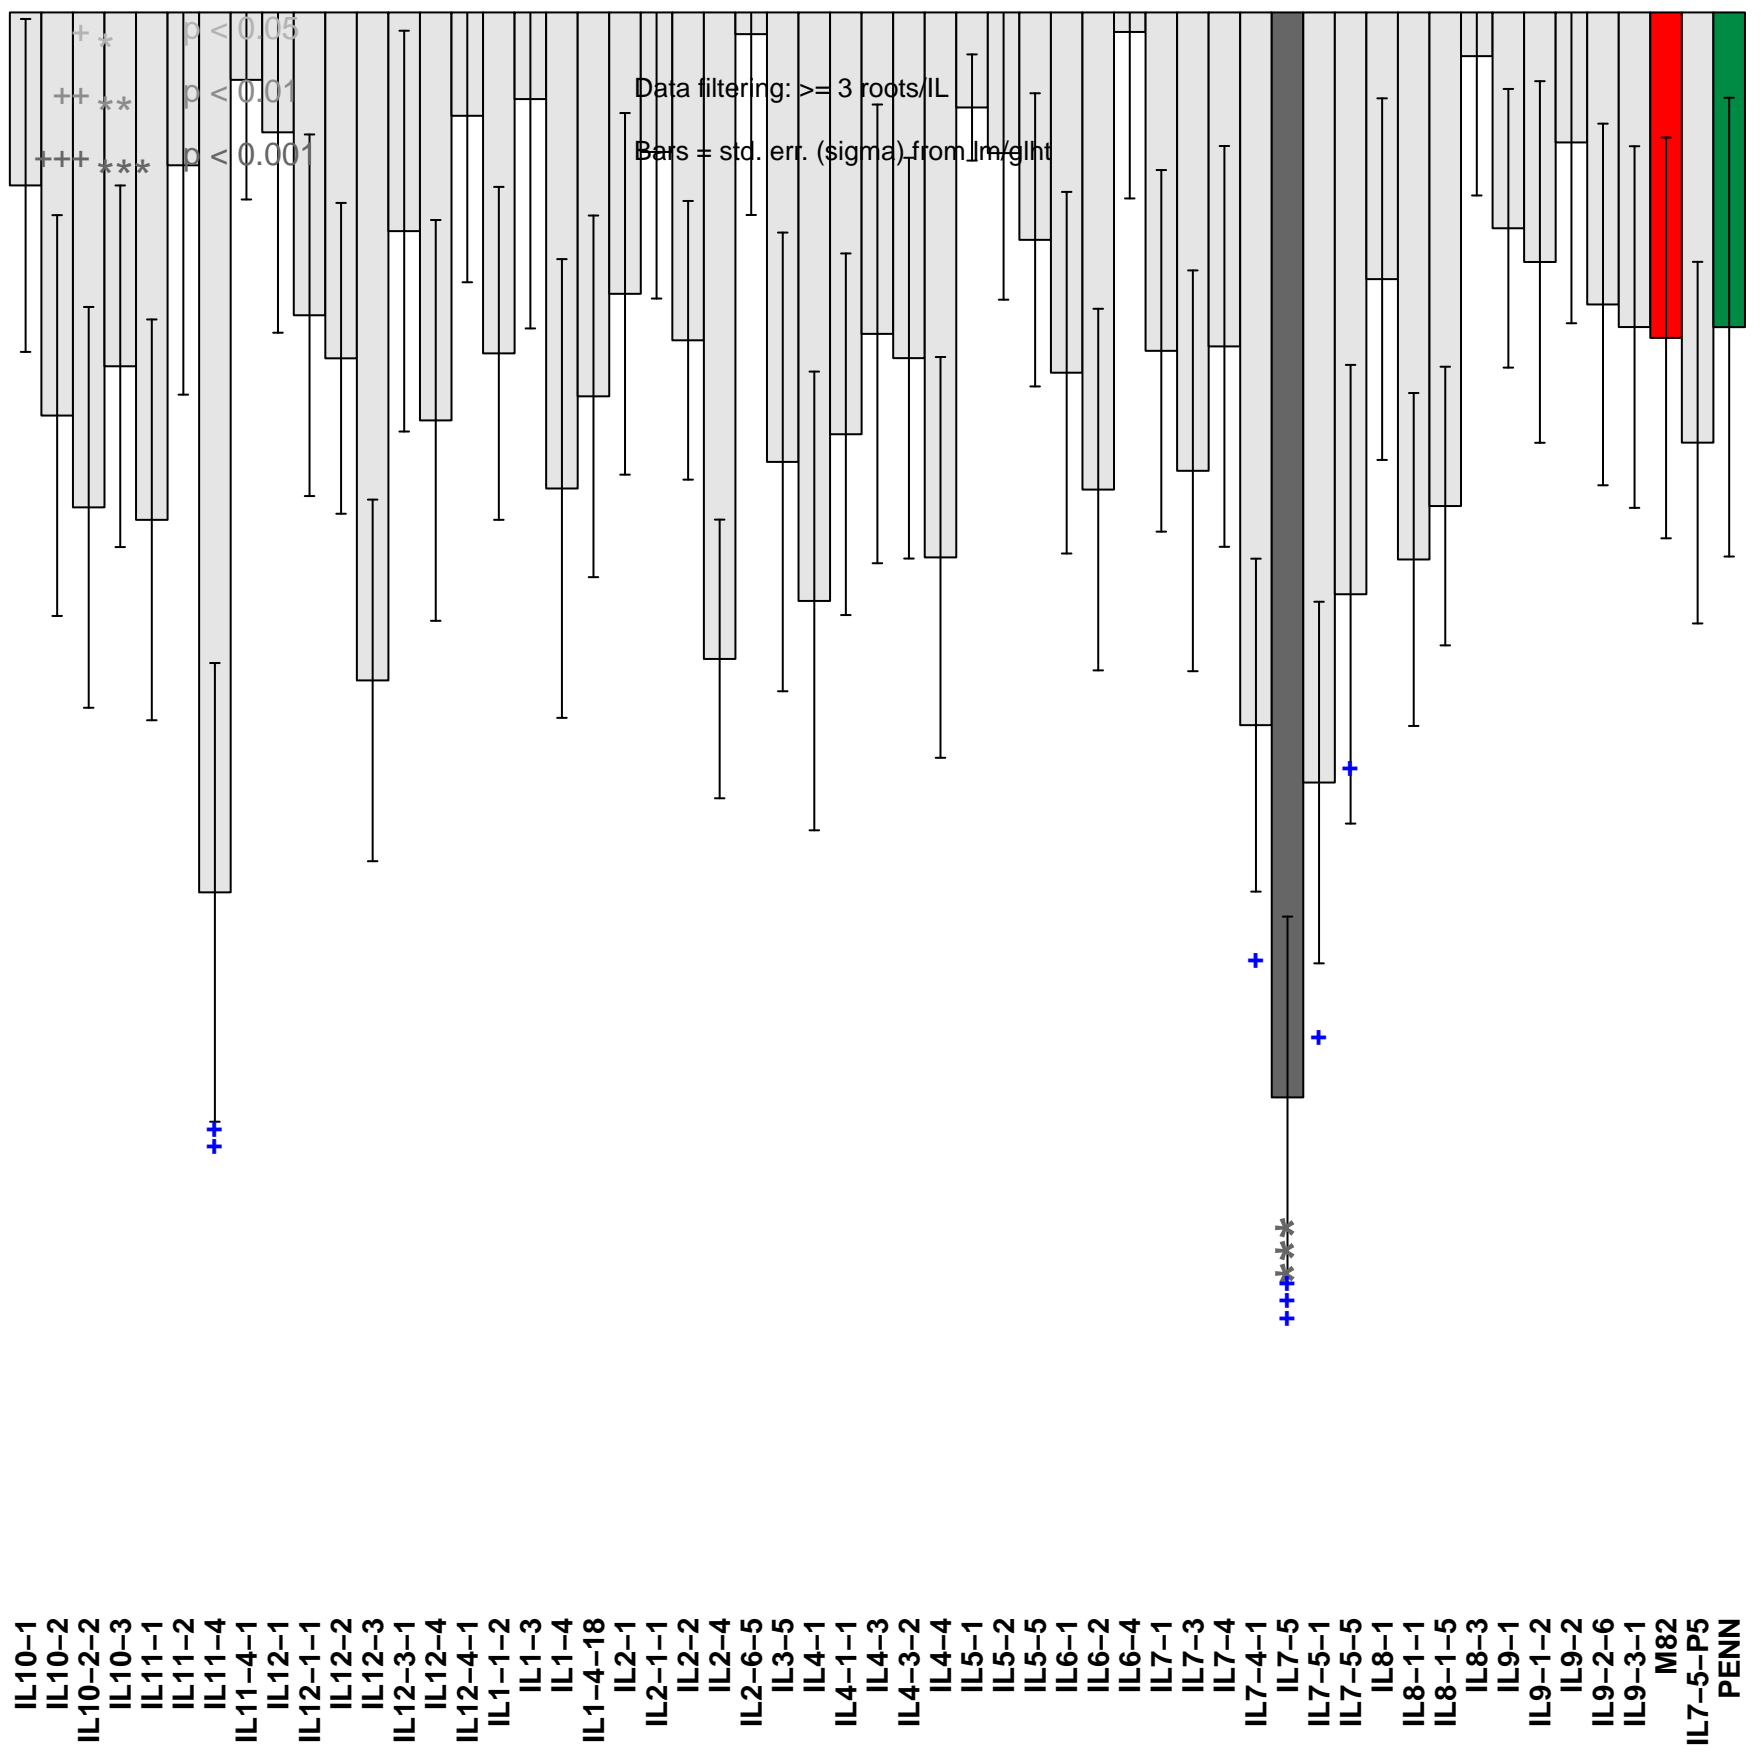

# Angle Away T4

degrees

10  
0  
-10  
-20  
-30  
-40

+ \* p < 0.05  
++ \*\* p < 0.01  
+++ \*\*\* p < 0.001

Data filtering: >= 3 roots/IL

Bars = std. err. (sigma) from lm/glht

IL10-1  
IL10-2  
IL10-2-2  
IL10-3  
IL11-1  
IL11-2  
IL11-4  
IL11-4-1  
IL12-1  
IL12-1-1  
IL12-2  
IL12-3  
IL12-3-1  
IL12-4  
IL12-4-1  
IL1-1-2  
IL1-3  
IL1-4  
IL1-4-18  
IL2-1  
IL2-1-1  
IL2-2  
IL2-4  
IL2-6-5  
IL3-5  
IL4-1  
IL4-1-1  
IL4-3  
IL4-3-2  
IL4-4  
IL5-1  
IL5-2  
IL5-5  
IL6-1  
IL6-2  
IL6-4  
IL7-1  
IL7-3  
IL7-4  
IL7-4-1  
IL7-5  
IL7-5-1  
IL7-5-5  
IL8-1  
IL8-1-1  
IL8-1-5  
IL8-3  
IL9-1  
IL9-1-2  
IL9-2  
IL9-2-6  
IL9-3-1  
M82  
IL7-5-P5  
PENN

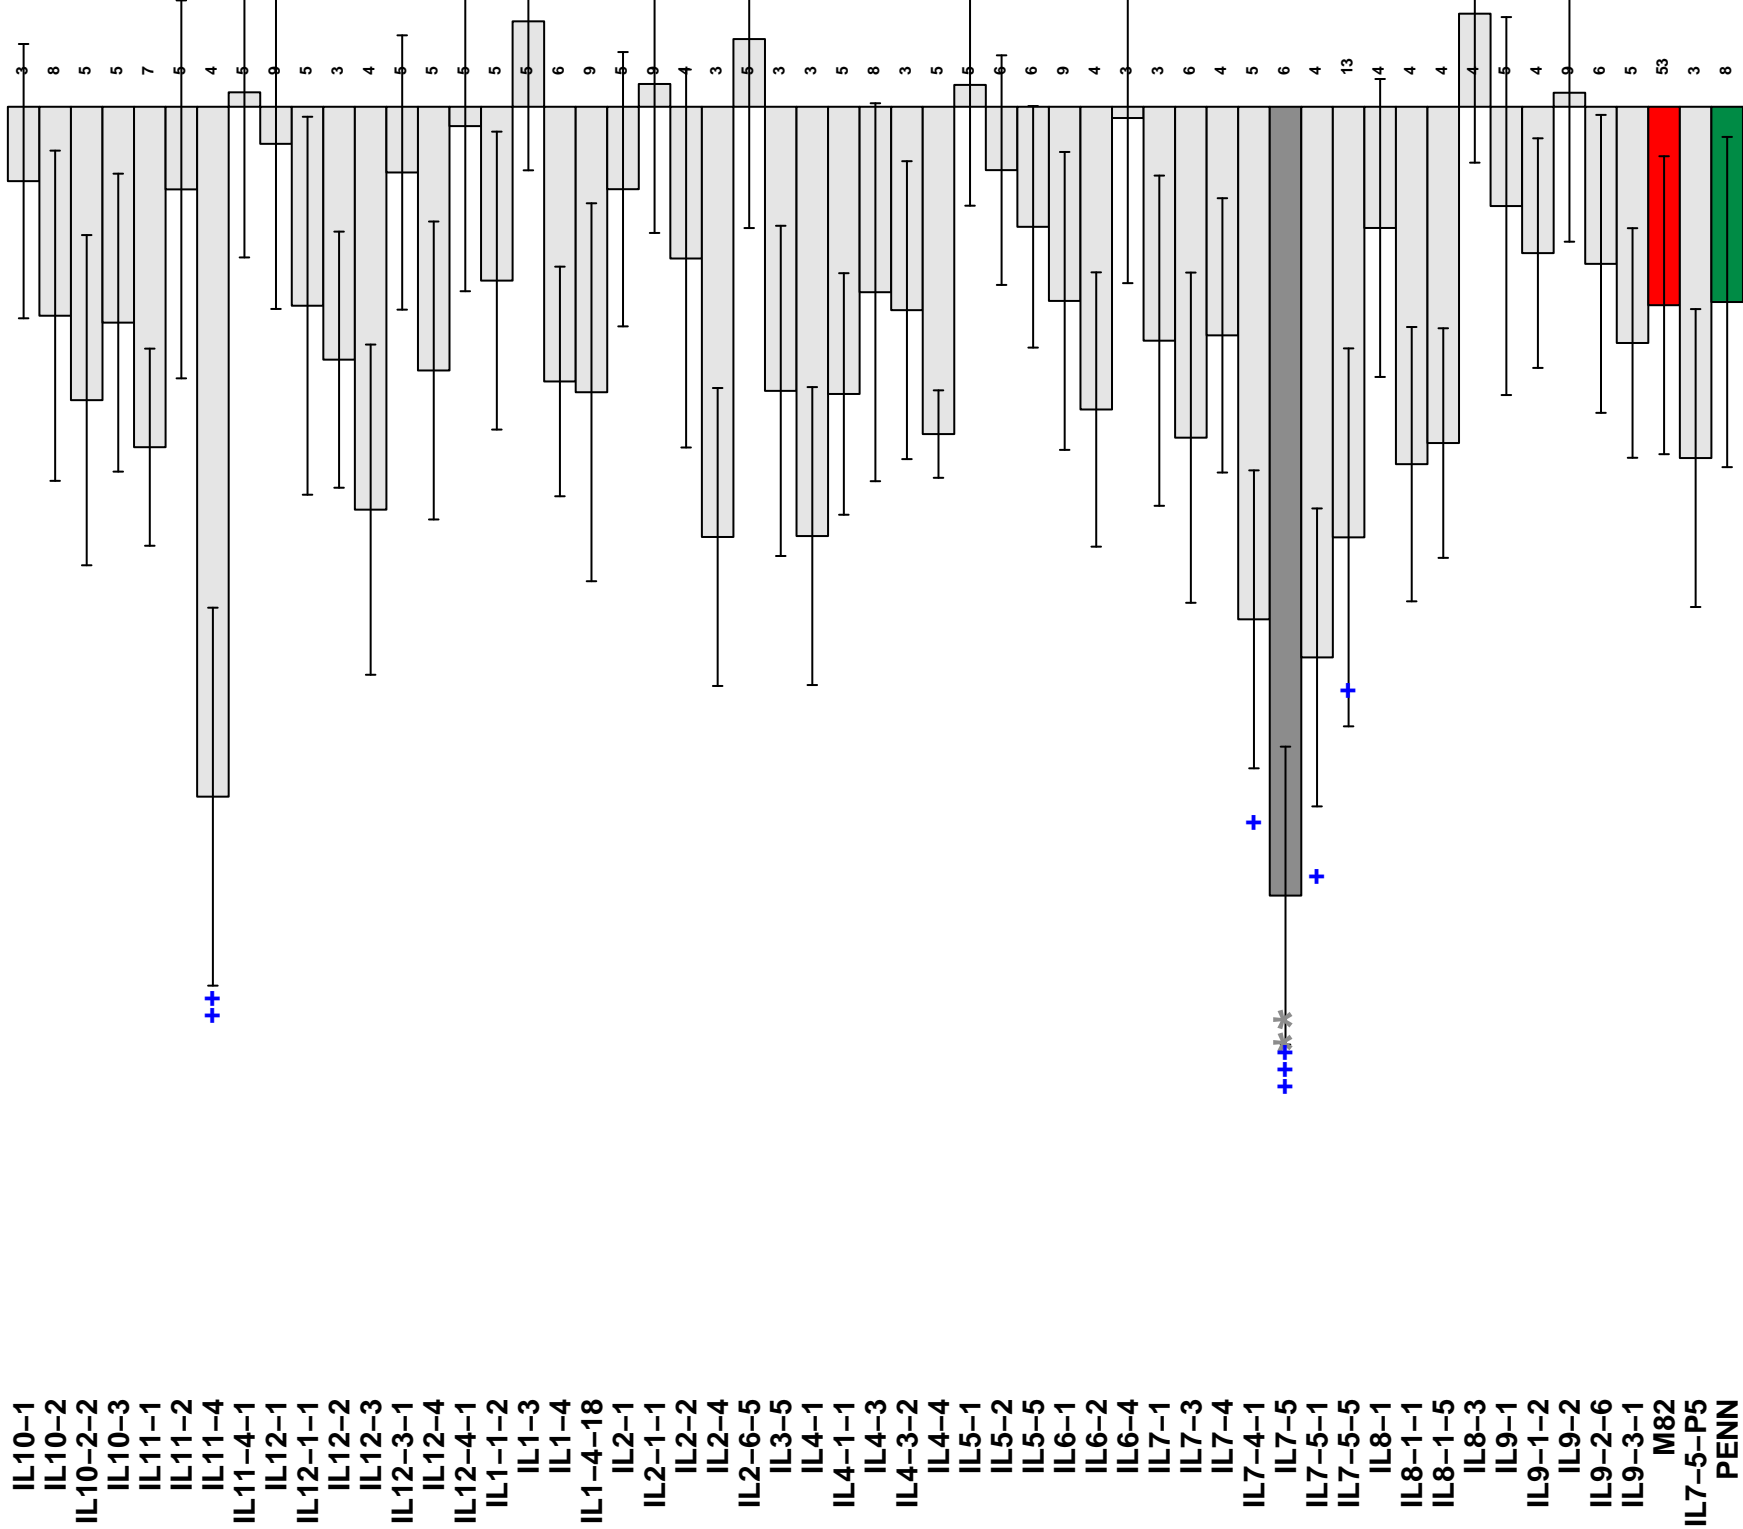

# Angle Away T5

degrees

-40 -30 -20 -10 0 10 20

+ \*     $p < 0.05$   
 ++ \*\*     $p < 0.01$   
 +++ \*\*\*     $p < 0.001$

Data filtering:  $\geq 3$  roots/IL

Bars = std. err. (sigma) from lm/glht

IL10-1  
 IL10-2  
 IL10-2-2  
 IL10-3  
 IL11-1  
 IL11-2  
 IL11-4  
 IL11-4-1  
 IL12-1  
 IL12-1-1  
 IL12-2  
 IL12-3  
 IL12-3-1  
 IL12-4  
 IL12-4-1  
 IL1-1-2  
 IL1-3  
 IL1-4  
 IL1-4-18  
 IL2-1  
 IL2-1-1  
 IL2-2  
 IL2-4  
 IL2-6-5  
 IL3-5  
 IL4-1  
 IL4-1-1  
 IL4-3  
 IL4-3-2  
 IL4-4  
 IL5-1  
 IL5-2  
 IL5-5  
 IL6-1  
 IL6-2  
 IL6-4  
 IL7-1  
 IL7-3  
 IL7-4  
 IL7-4-1  
 IL7-5  
 IL7-5-1  
 IL7-5-5  
 IL8-1  
 IL8-1-1  
 IL8-1-5  
 IL8-3  
 IL9-1  
 IL9-1-2  
 IL9-2  
 IL9-2-6  
 IL9-3-1  
 M82  
 IL7-5-P5  
 PENN

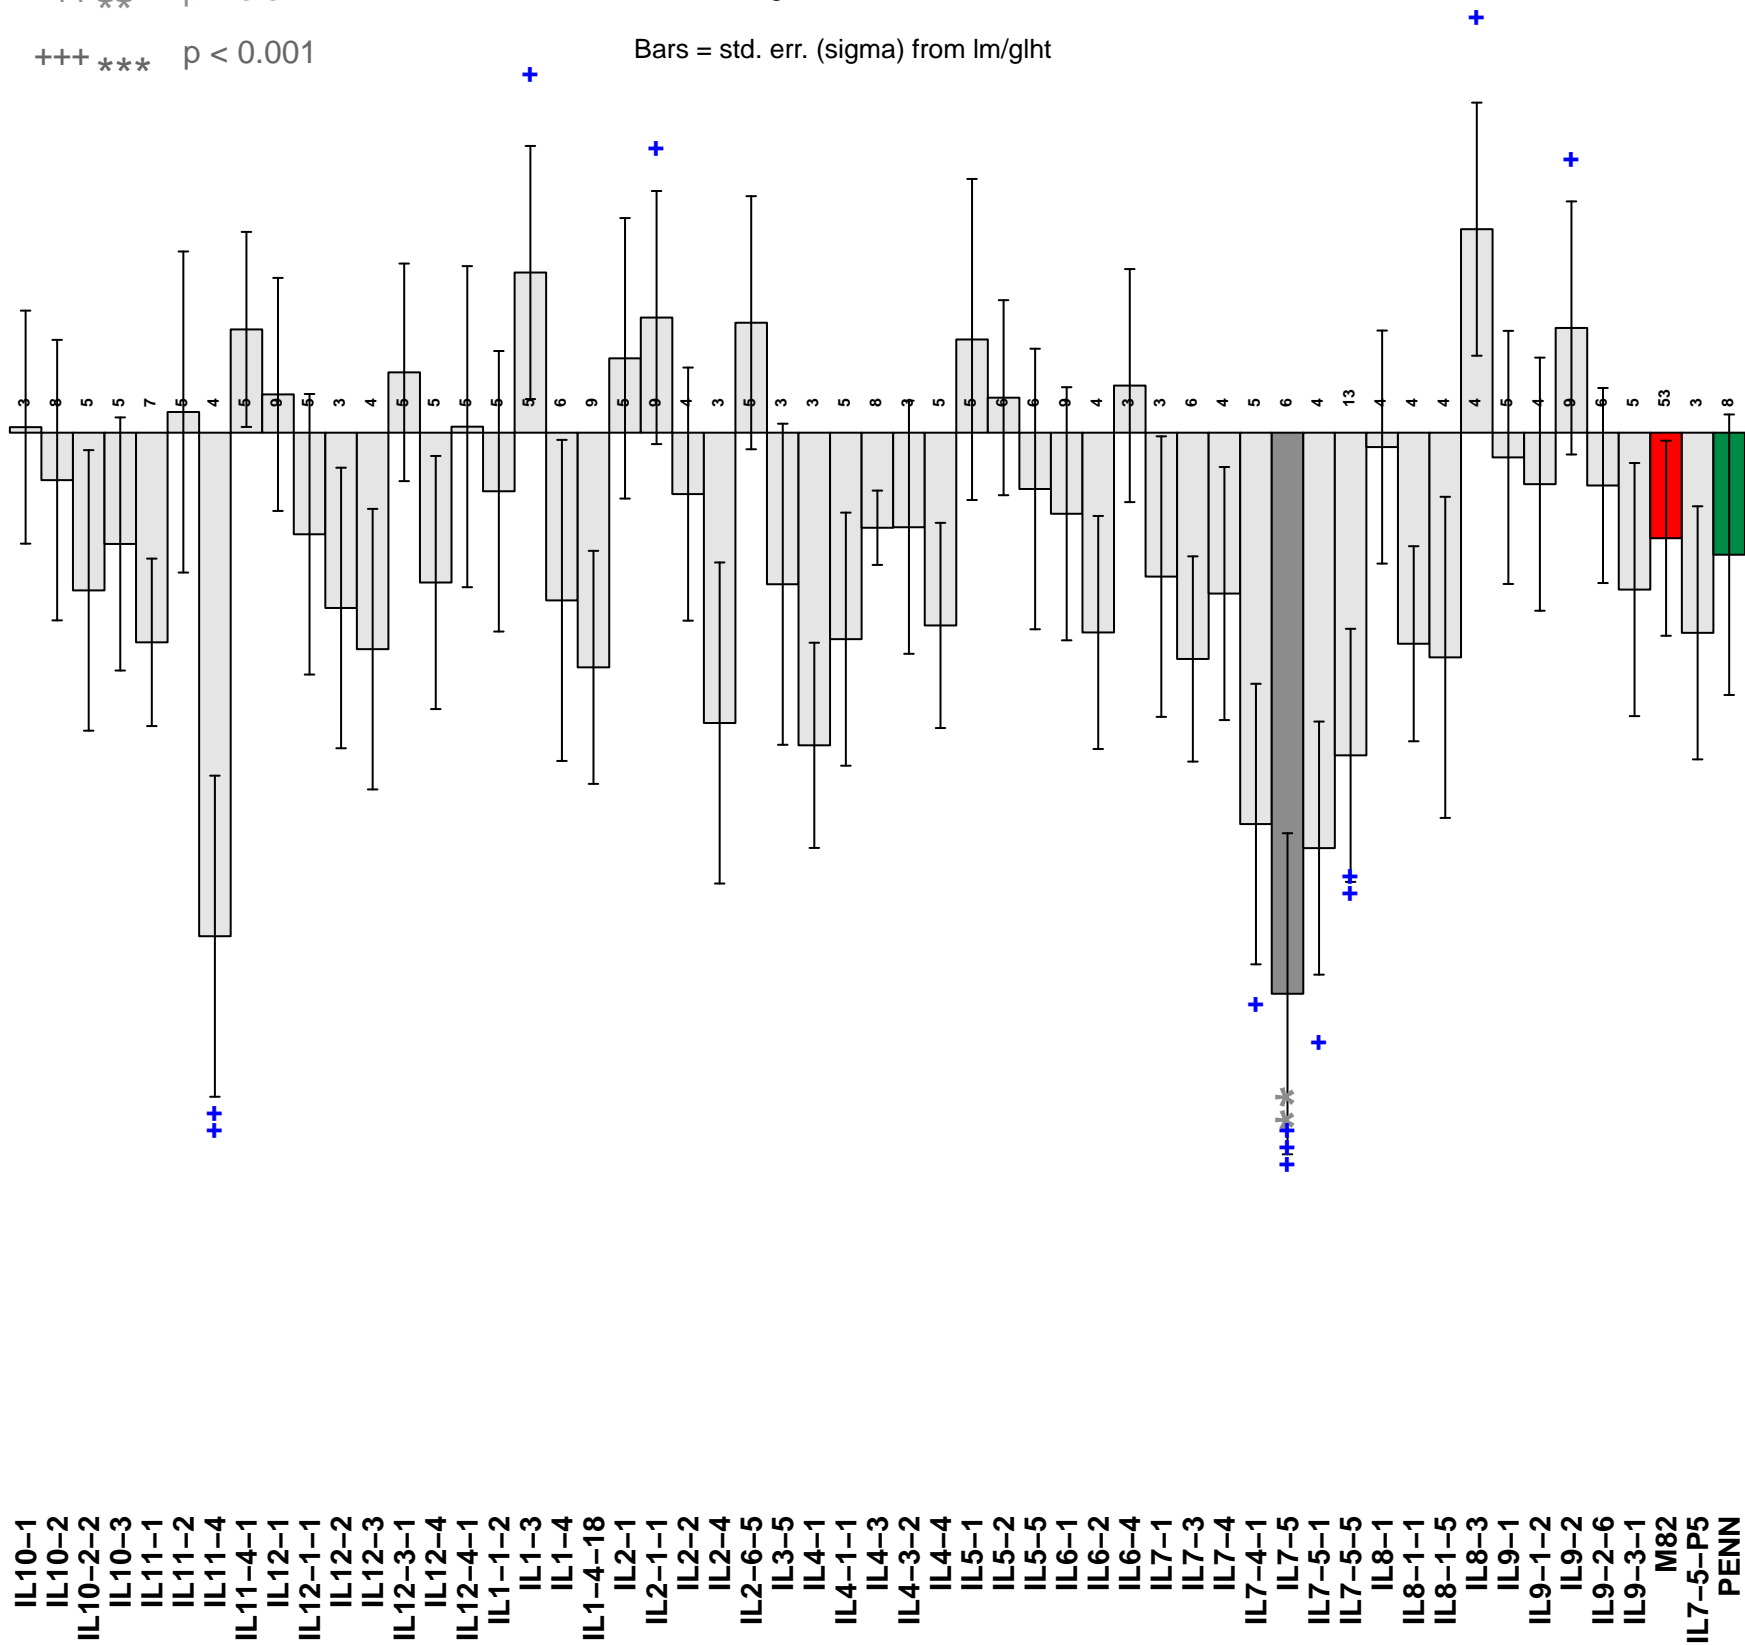

# Angle Away T6

degrees

20  
10  
0  
-10  
-20  
-30

+ \* p < 0.05  
++ \*\* p < 0.01  
+++ \*\*\* p < 0.001

Data filtering: >= 3 roots/IL

Bars = std. err. (sigma) from lm/glht

IL10-1  
IL10-2  
IL10-2-2  
IL10-3  
IL11-1  
IL11-2  
IL11-4  
IL11-4-1  
IL12-1  
IL12-1-1  
IL12-2  
IL12-3  
IL12-3-1  
IL12-4  
IL12-4-1  
IL1-1-2  
IL1-3  
IL1-4  
IL1-4-18  
IL2-1  
IL2-1-1  
IL2-2  
IL2-4  
IL2-6-5  
IL3-5  
IL4-1  
IL4-1-1  
IL4-3  
IL4-3-2  
IL4-4  
IL5-1  
IL5-2  
IL5-5  
IL6-1  
IL6-2  
IL6-4  
IL7-1  
IL7-3  
IL7-4  
IL7-4-1  
IL7-5  
IL7-5-1  
IL7-5-5  
IL8-1  
IL8-1-1  
IL8-1-5  
IL8-3  
IL9-1  
IL9-1-2  
IL9-2  
IL9-2-6  
IL9-3-1  
M82  
IL7-5-P5  
PENN

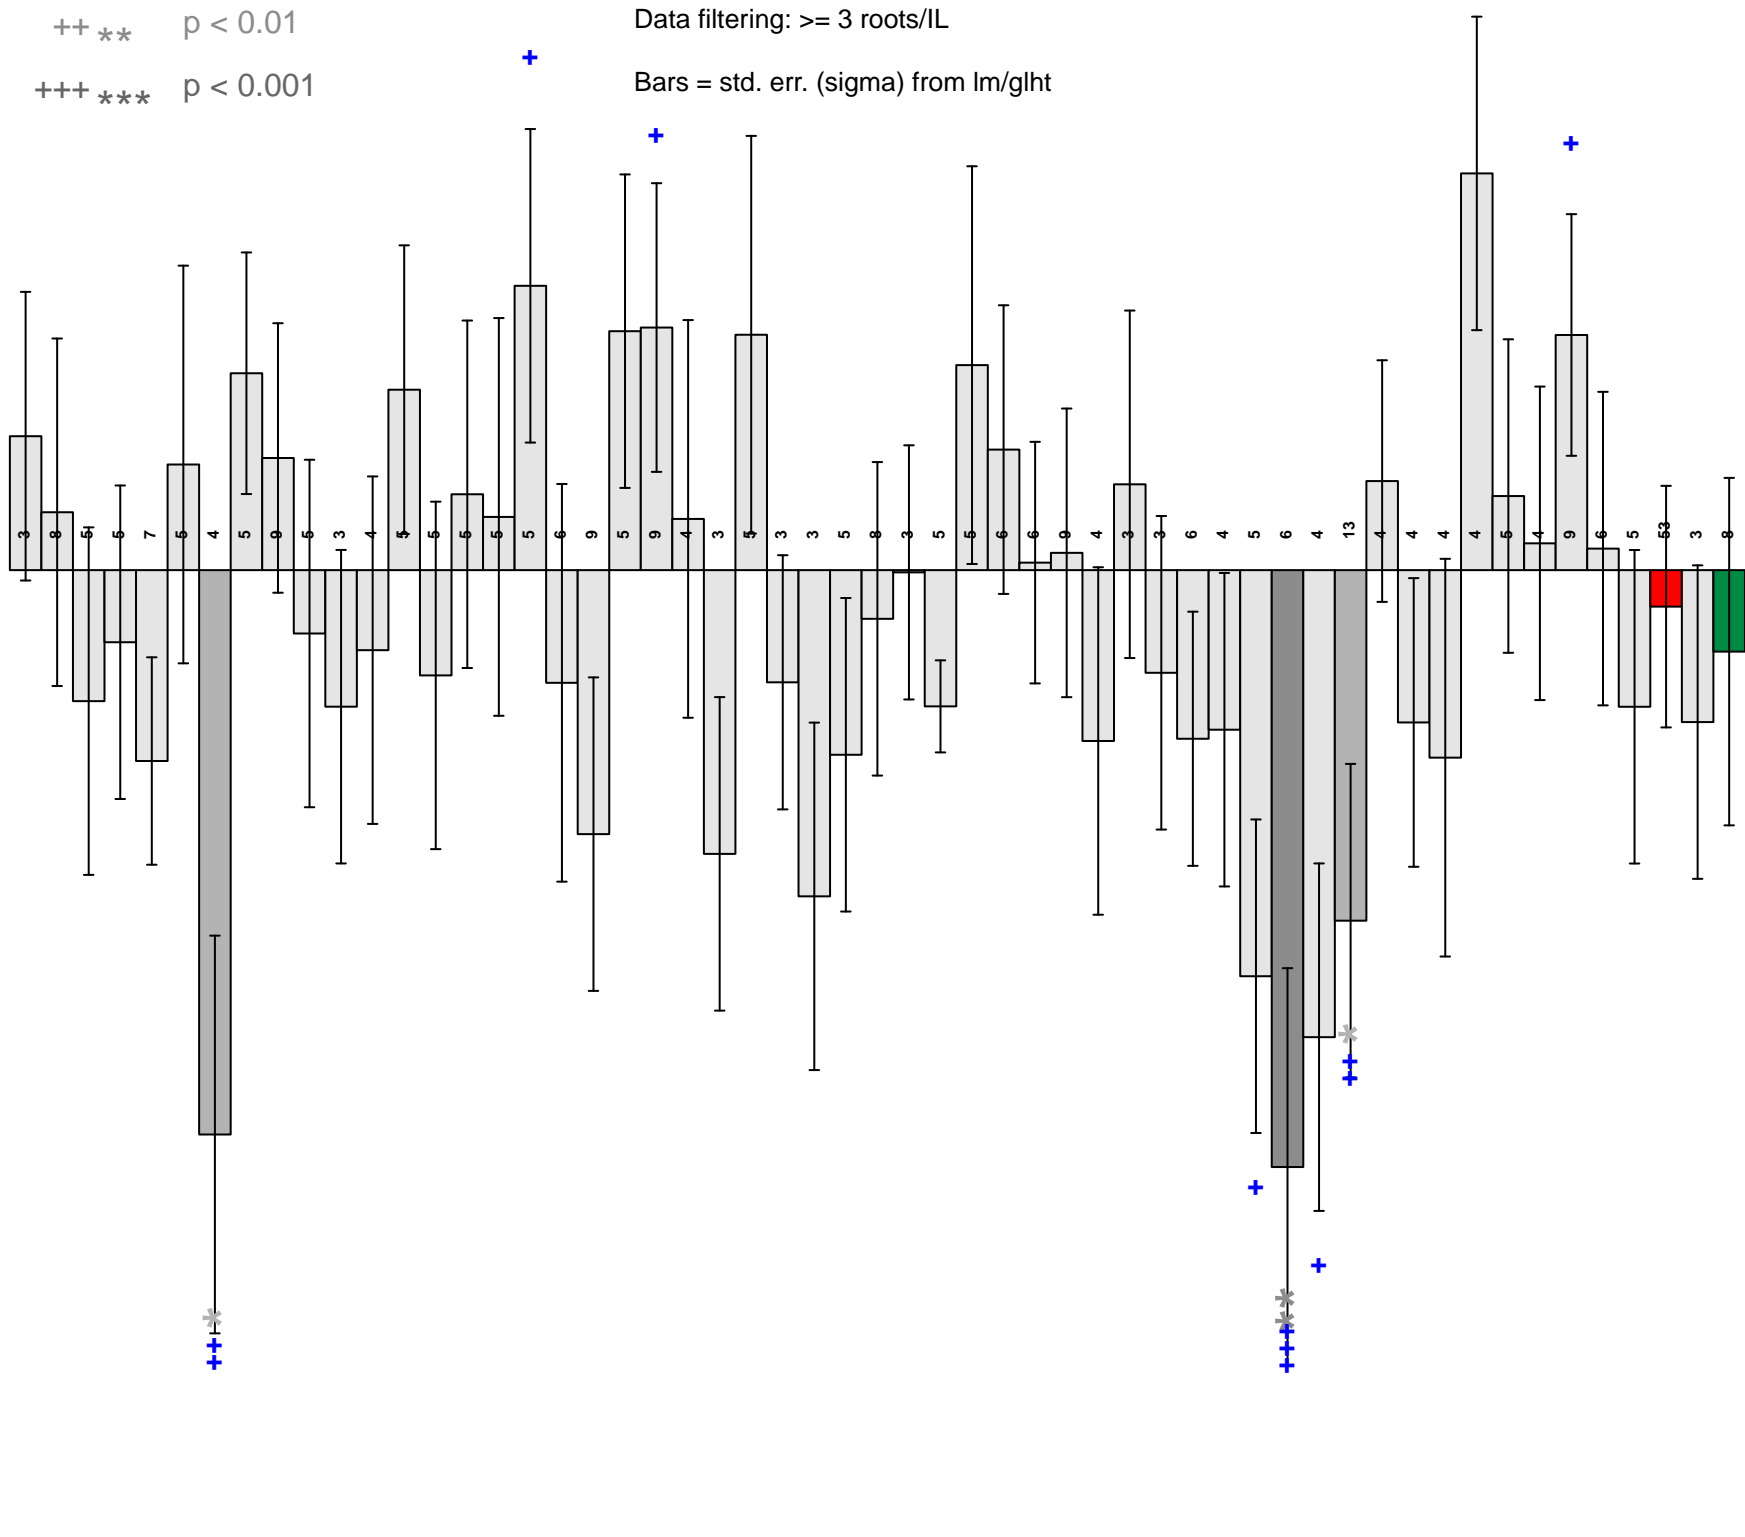

# Angle Away T7

degrees

30  
20  
10  
0  
-10  
-20  
-30

+ \*  $p < 0.05$   
++ \*\*  $p < 0.01$   
+++ \*\*\*  $p < 0.001$

Data filtering:  $\geq 3$  roots/IL

Bars = std. err. (sigma) from lm/glht

IL10-1  
IL10-2  
IL10-2-2  
IL10-3  
IL11-1  
IL11-2  
IL11-4  
IL11-4-1  
IL12-1  
IL12-1-1  
IL12-2  
IL12-3  
IL12-3-1  
IL12-4  
IL12-4-1  
IL1-1-2  
IL1-3  
IL1-4  
IL1-4-18  
IL2-1  
IL2-1-1  
IL2-2  
IL2-4  
IL2-6-5  
IL3-5  
IL4-1  
IL4-1-1  
IL4-3  
IL4-3-2  
IL4-4  
IL5-1  
IL5-2  
IL5-5  
IL6-1  
IL6-2  
IL6-4  
IL7-1  
IL7-3  
IL7-4  
IL7-4-1  
IL7-5  
IL7-5-1  
IL7-5-5  
IL8-1  
IL8-1-1  
IL8-1-5  
IL8-3  
IL9-1  
IL9-1-2  
IL9-2  
IL9-2-6  
IL9-3-1  
M82  
IL7-5-P5  
PENN

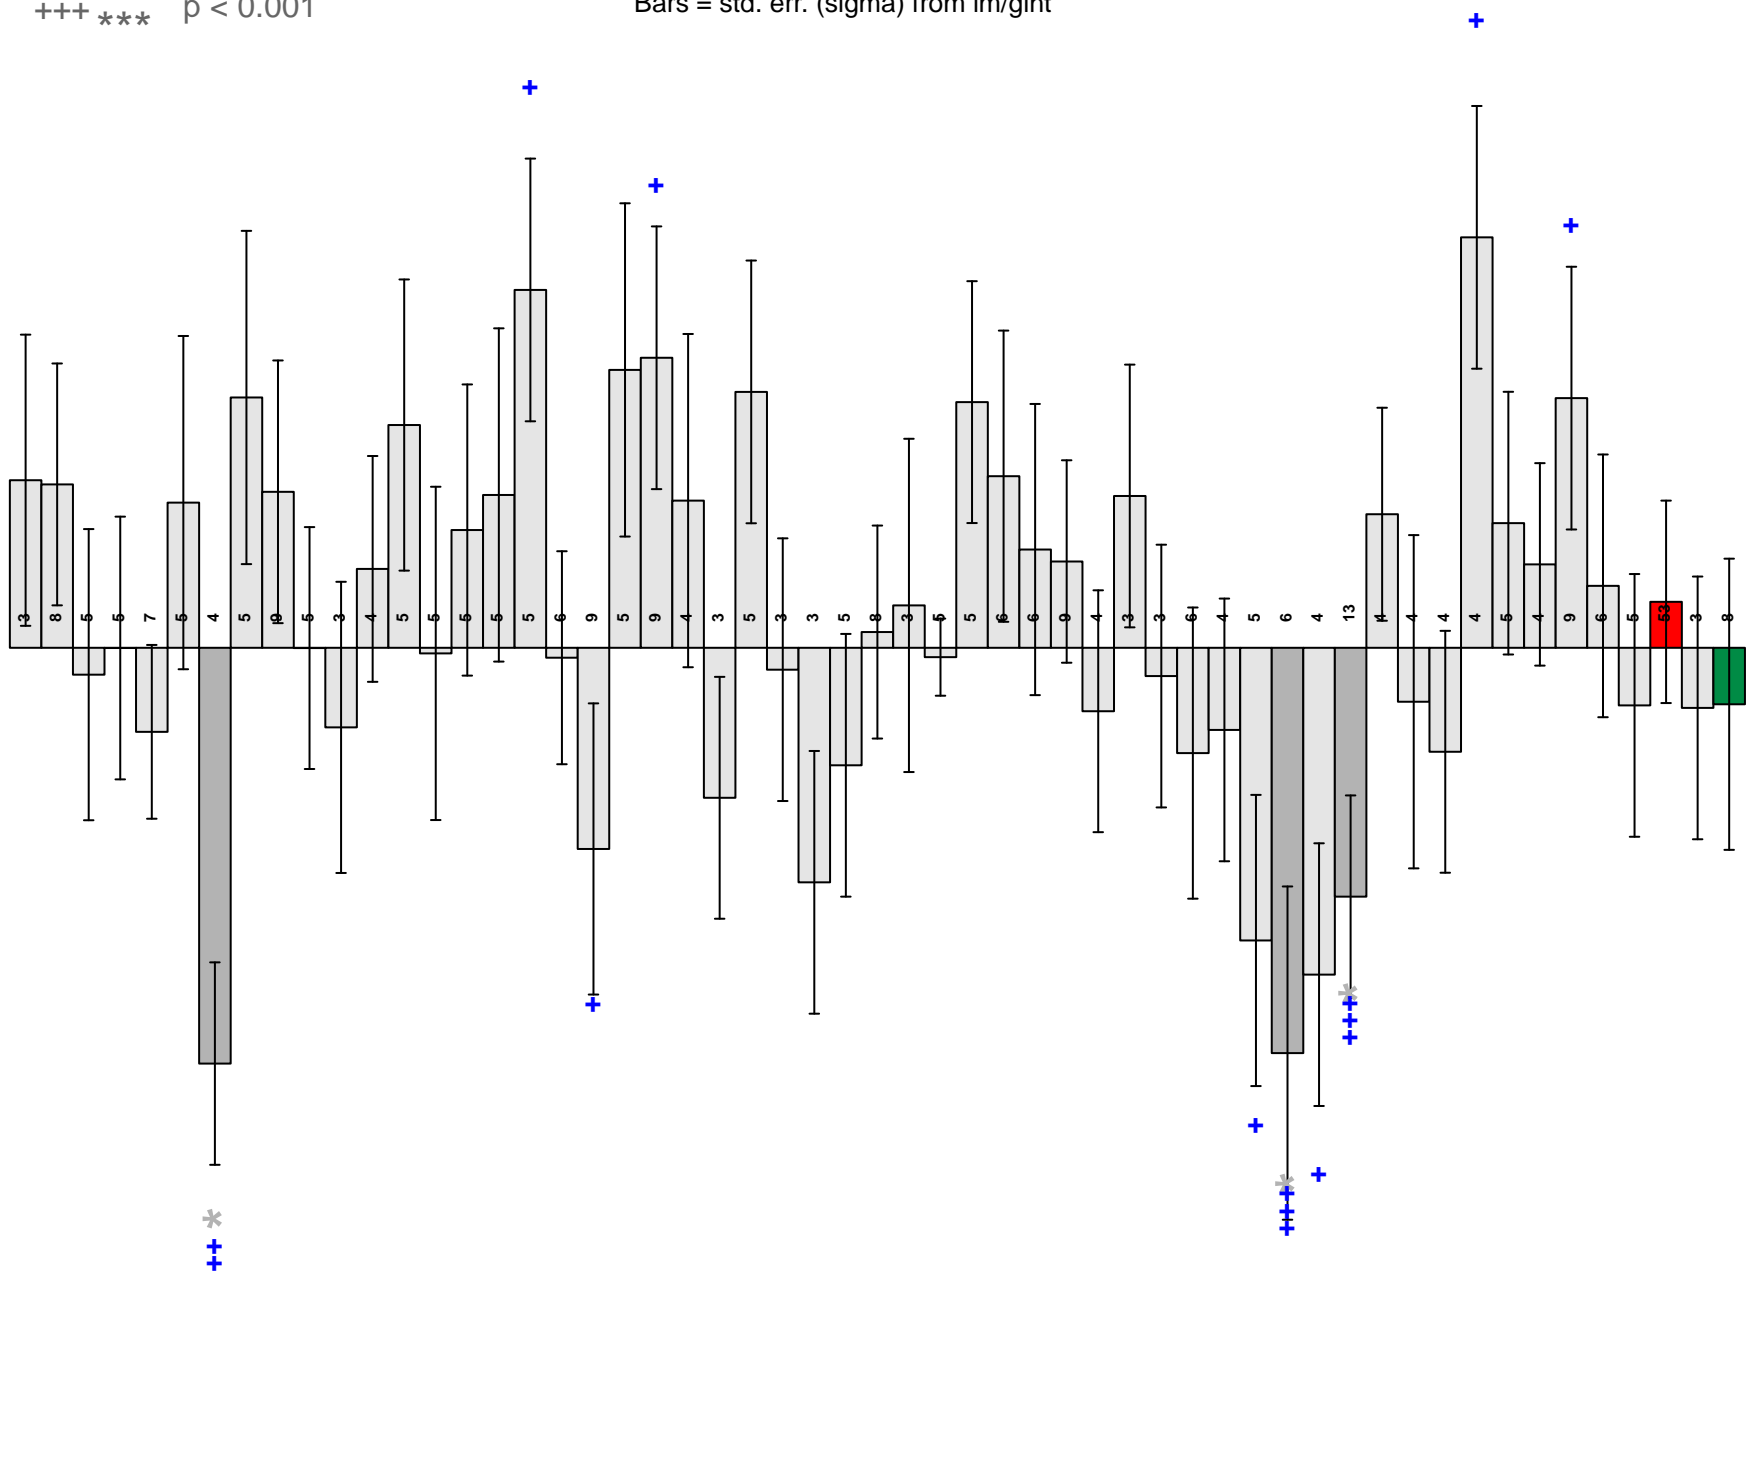



## Angle Away T8

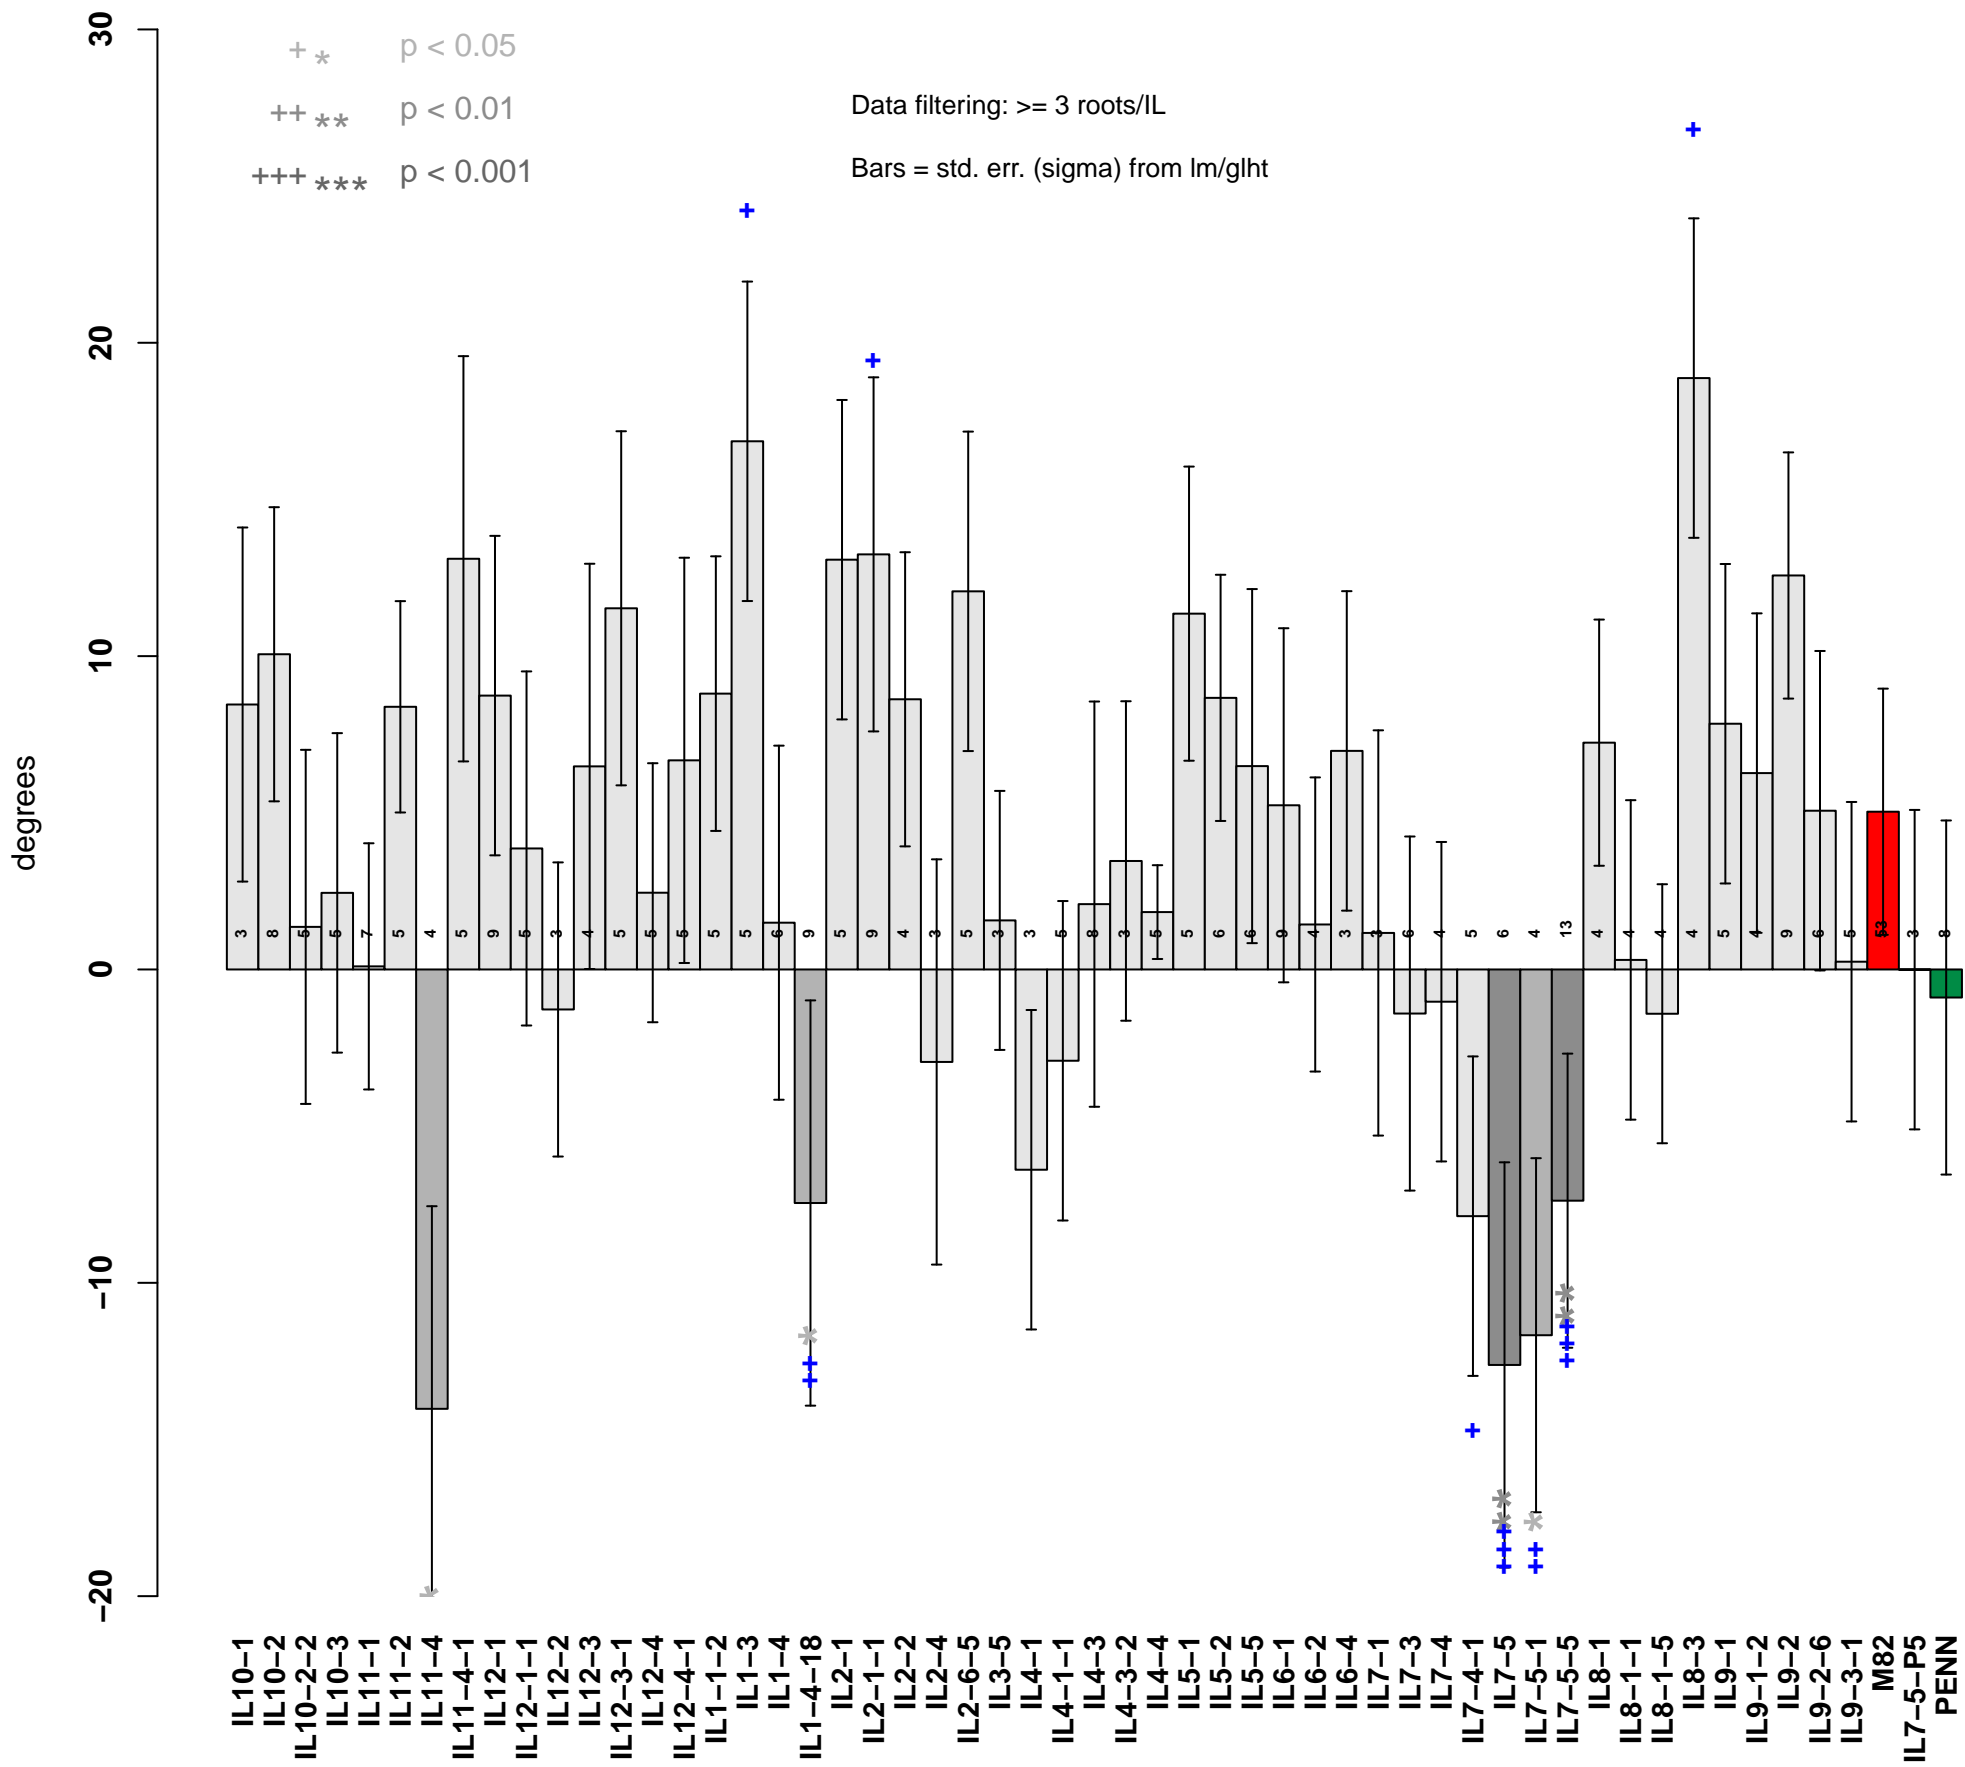

# Angle Away T9

degrees

40  
30  
20  
10  
0  
-10  
-20

+ \* p < 0.05  
++ \*\* p < 0.01  
+++ \*\*\* p < 0.001

Data filtering: >= 3 roots/IL

Bars = std. err. (sigma) from lm/glht

IL10-1  
IL10-2  
IL10-2-2  
IL10-3  
IL11-1  
IL11-2  
IL11-4  
IL11-4-1  
IL12-1  
IL12-1-1  
IL12-2  
IL12-3  
IL12-3-1  
IL12-4  
IL12-4-1  
IL1-1-2  
IL1-3  
IL1-4  
IL1-4-18  
IL2-1  
IL2-1-1  
IL2-2  
IL2-4  
IL2-6-5  
IL3-5  
IL4-1  
IL4-1-1  
IL4-3  
IL4-3-2  
IL4-4  
IL5-1  
IL5-2  
IL5-5  
IL6-1  
IL6-2  
IL6-4  
IL7-1  
IL7-3  
IL7-4  
IL7-4-1  
IL7-5  
IL7-5-1  
IL7-5-5  
IL8-1  
IL8-1-1  
IL8-1-5  
IL8-3  
IL9-1  
IL9-1-2  
IL9-2  
IL9-2-6  
IL9-3-1  
M82  
IL7-5-P5  
PENN

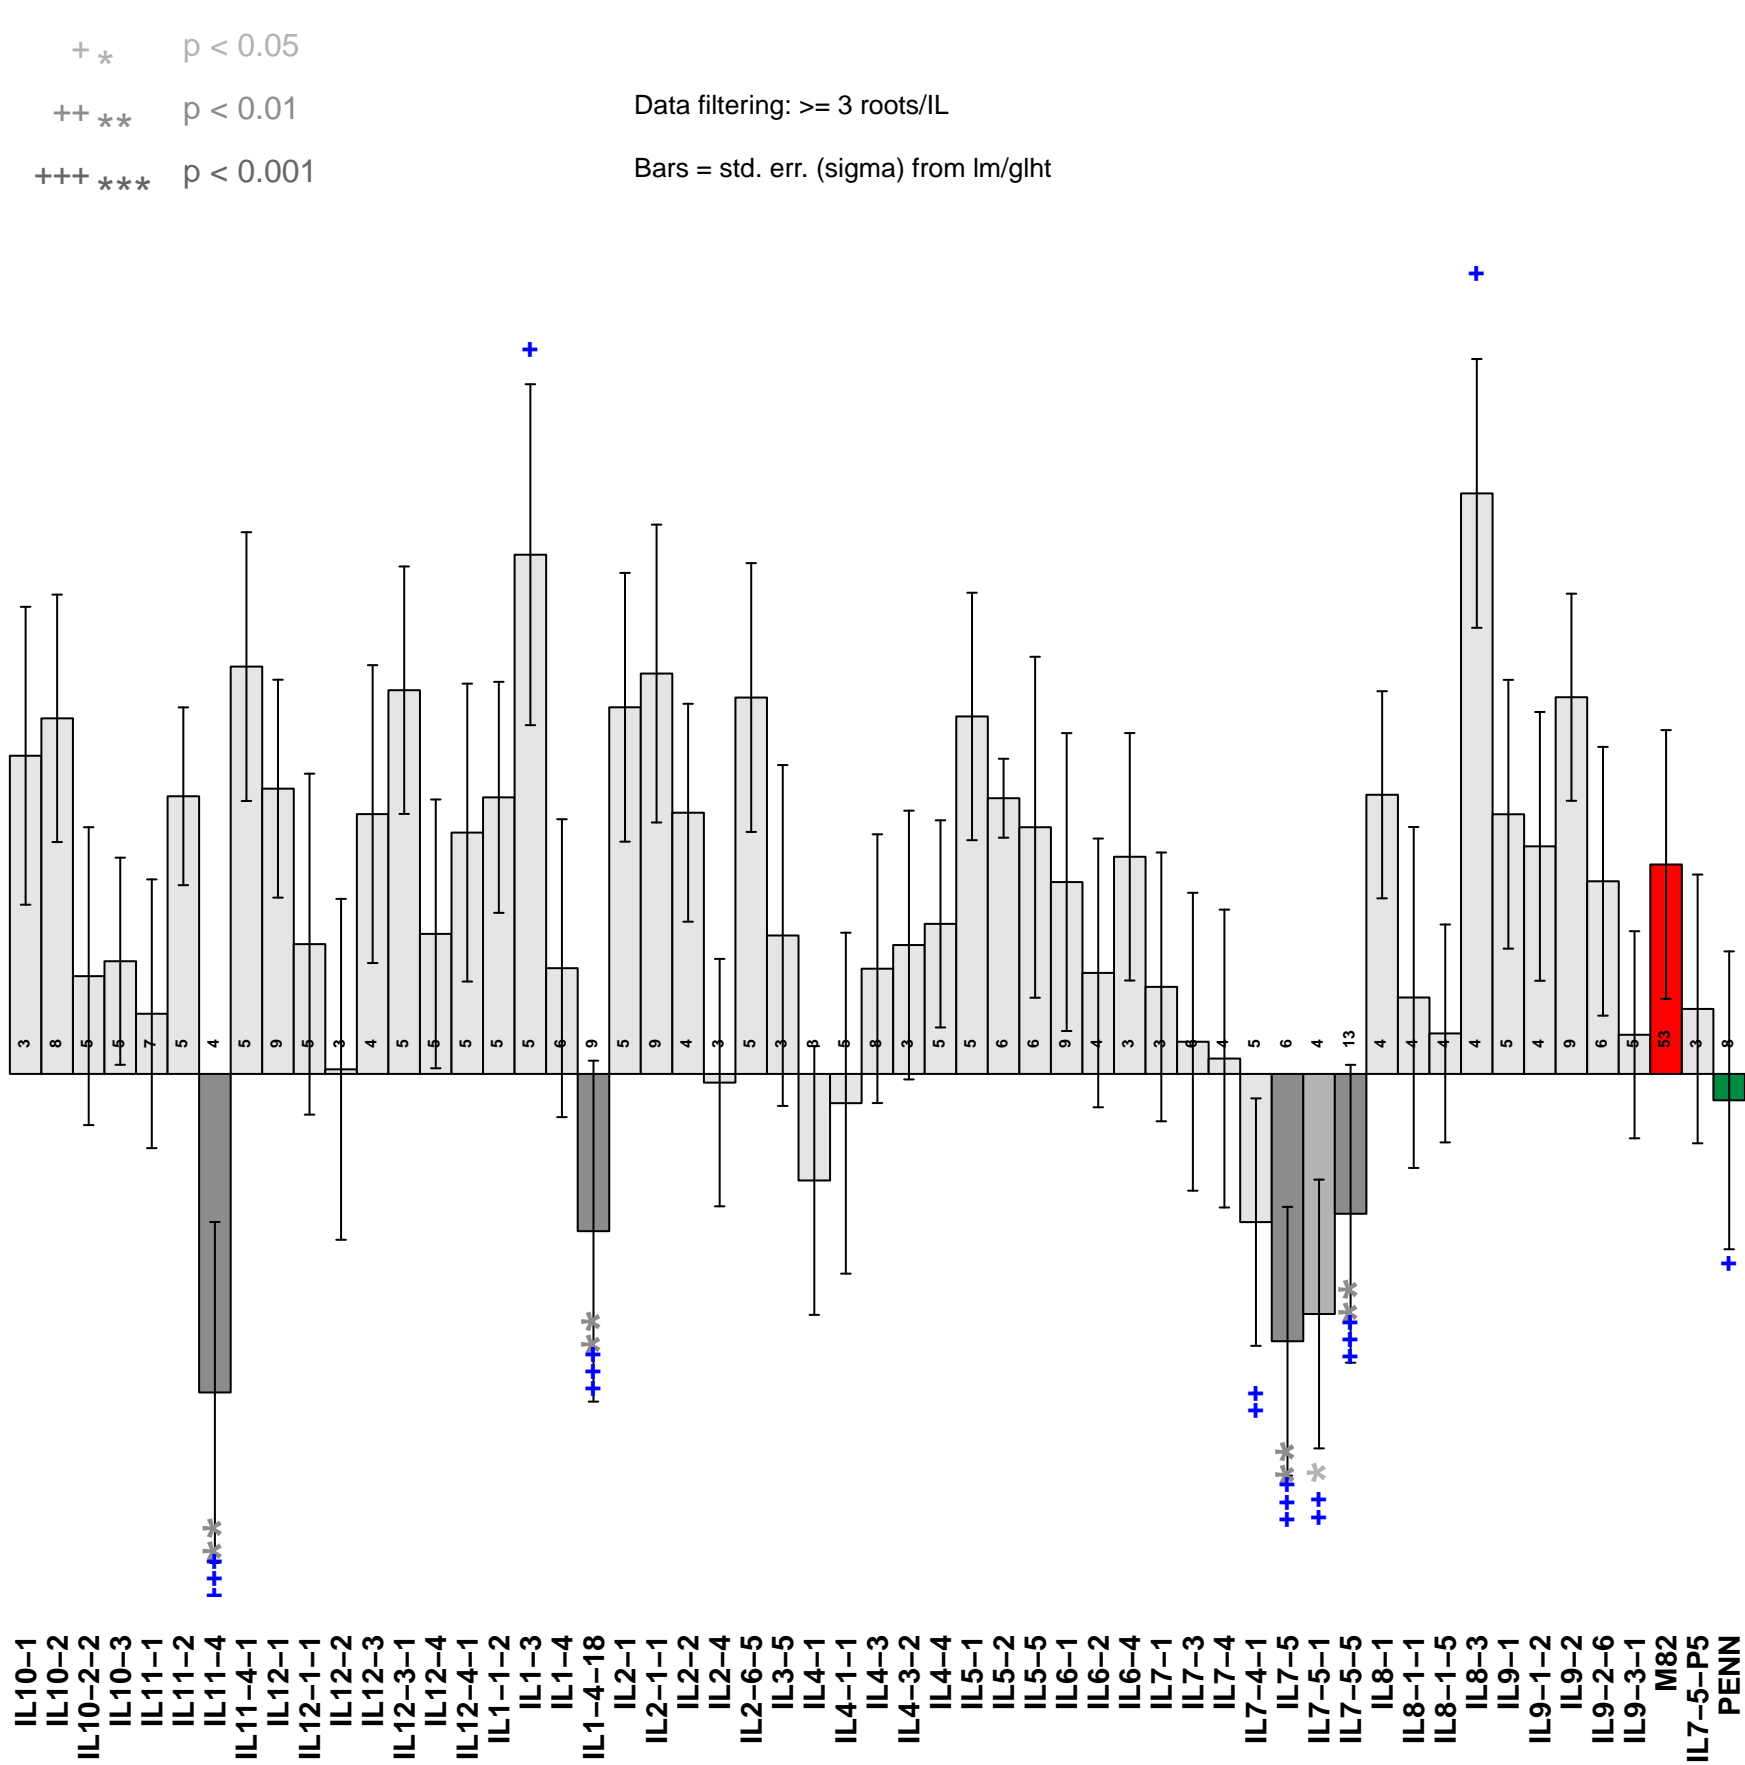

Angle Away T10

+ \*    p < 0.05  
++ \*\*    p < 0.01  
+++ \*\*\*    p < 0.001

Data filtering: >= 3 roots/IL

Bars = std. err. (sigma) from lm/glht

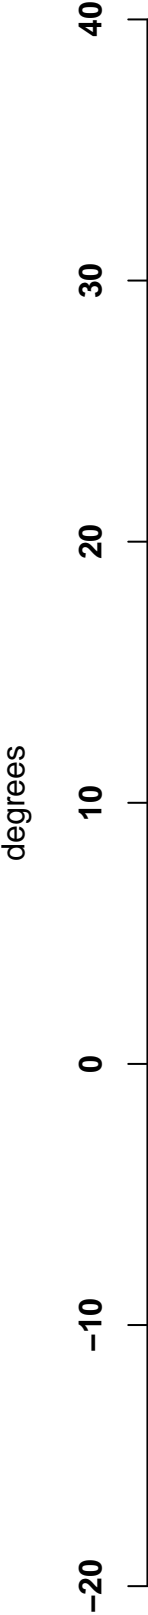

IL10-1  
IL10-2  
IL10-2-2  
IL10-3  
IL11-1  
IL11-2  
IL11-4  
IL11-4-1  
IL12-1  
IL12-1-1  
IL12-2  
IL12-3  
IL12-3-1  
IL12-4  
IL12-4-1  
IL1-1-2  
IL1-3  
IL1-4  
IL1-4-18  
IL2-1  
IL2-1-1  
IL2-2  
IL2-4  
IL2-6-5  
IL3-5  
IL4-1  
IL4-1-1  
IL4-3  
IL4-3-2  
IL4-4  
IL5-1  
IL5-2  
IL5-5  
IL6-1  
IL6-2  
IL6-4  
IL7-1  
IL7-3  
IL7-4  
IL7-4-1  
IL7-5  
IL7-5-1  
IL7-5-5  
IL8-1  
IL8-1-1  
IL8-1-5  
IL8-3  
IL9-1  
IL9-1-2  
IL9-2  
IL9-2-6  
IL9-3-1  
M82  
IL7-5-P5  
PENN

Angle Away T11

degrees

40  
30  
20  
10  
0  
-10  
-20

+ \*    p < 0.05  
++ \*\*    p < 0.01  
+++ \*\*\*    p < 0.001

Data filtering: >= 3 roots/IL

Bars = std. err. (sigma) from lm/glht

IL10-1  
IL10-2  
IL10-2-2  
IL10-3  
IL11-1  
IL11-2  
IL11-4  
IL11-4-1  
IL12-1  
IL12-1-1  
IL12-2  
IL12-3  
IL12-3-1  
IL12-4  
IL12-4-1  
IL1-1-2  
IL1-3  
IL1-4  
IL1-4-18  
IL2-1  
IL2-1-1  
IL2-2  
IL2-4  
IL2-6-5  
IL3-5  
IL4-1  
IL4-1-1  
IL4-3  
IL4-3-2  
IL4-4  
IL5-1  
IL5-2  
IL5-5  
IL5-5  
IL6-1  
IL6-2  
IL6-4  
IL7-1  
IL7-3  
IL7-4  
IL7-4-1  
IL7-5  
IL7-5-1  
IL7-5-5  
IL8-1  
IL8-1-1  
IL8-1-5  
IL8-3  
IL9-1  
IL9-1-2  
IL9-2  
IL9-2-6  
IL9-3-1  
M82  
IL7-5-P5  
PENN

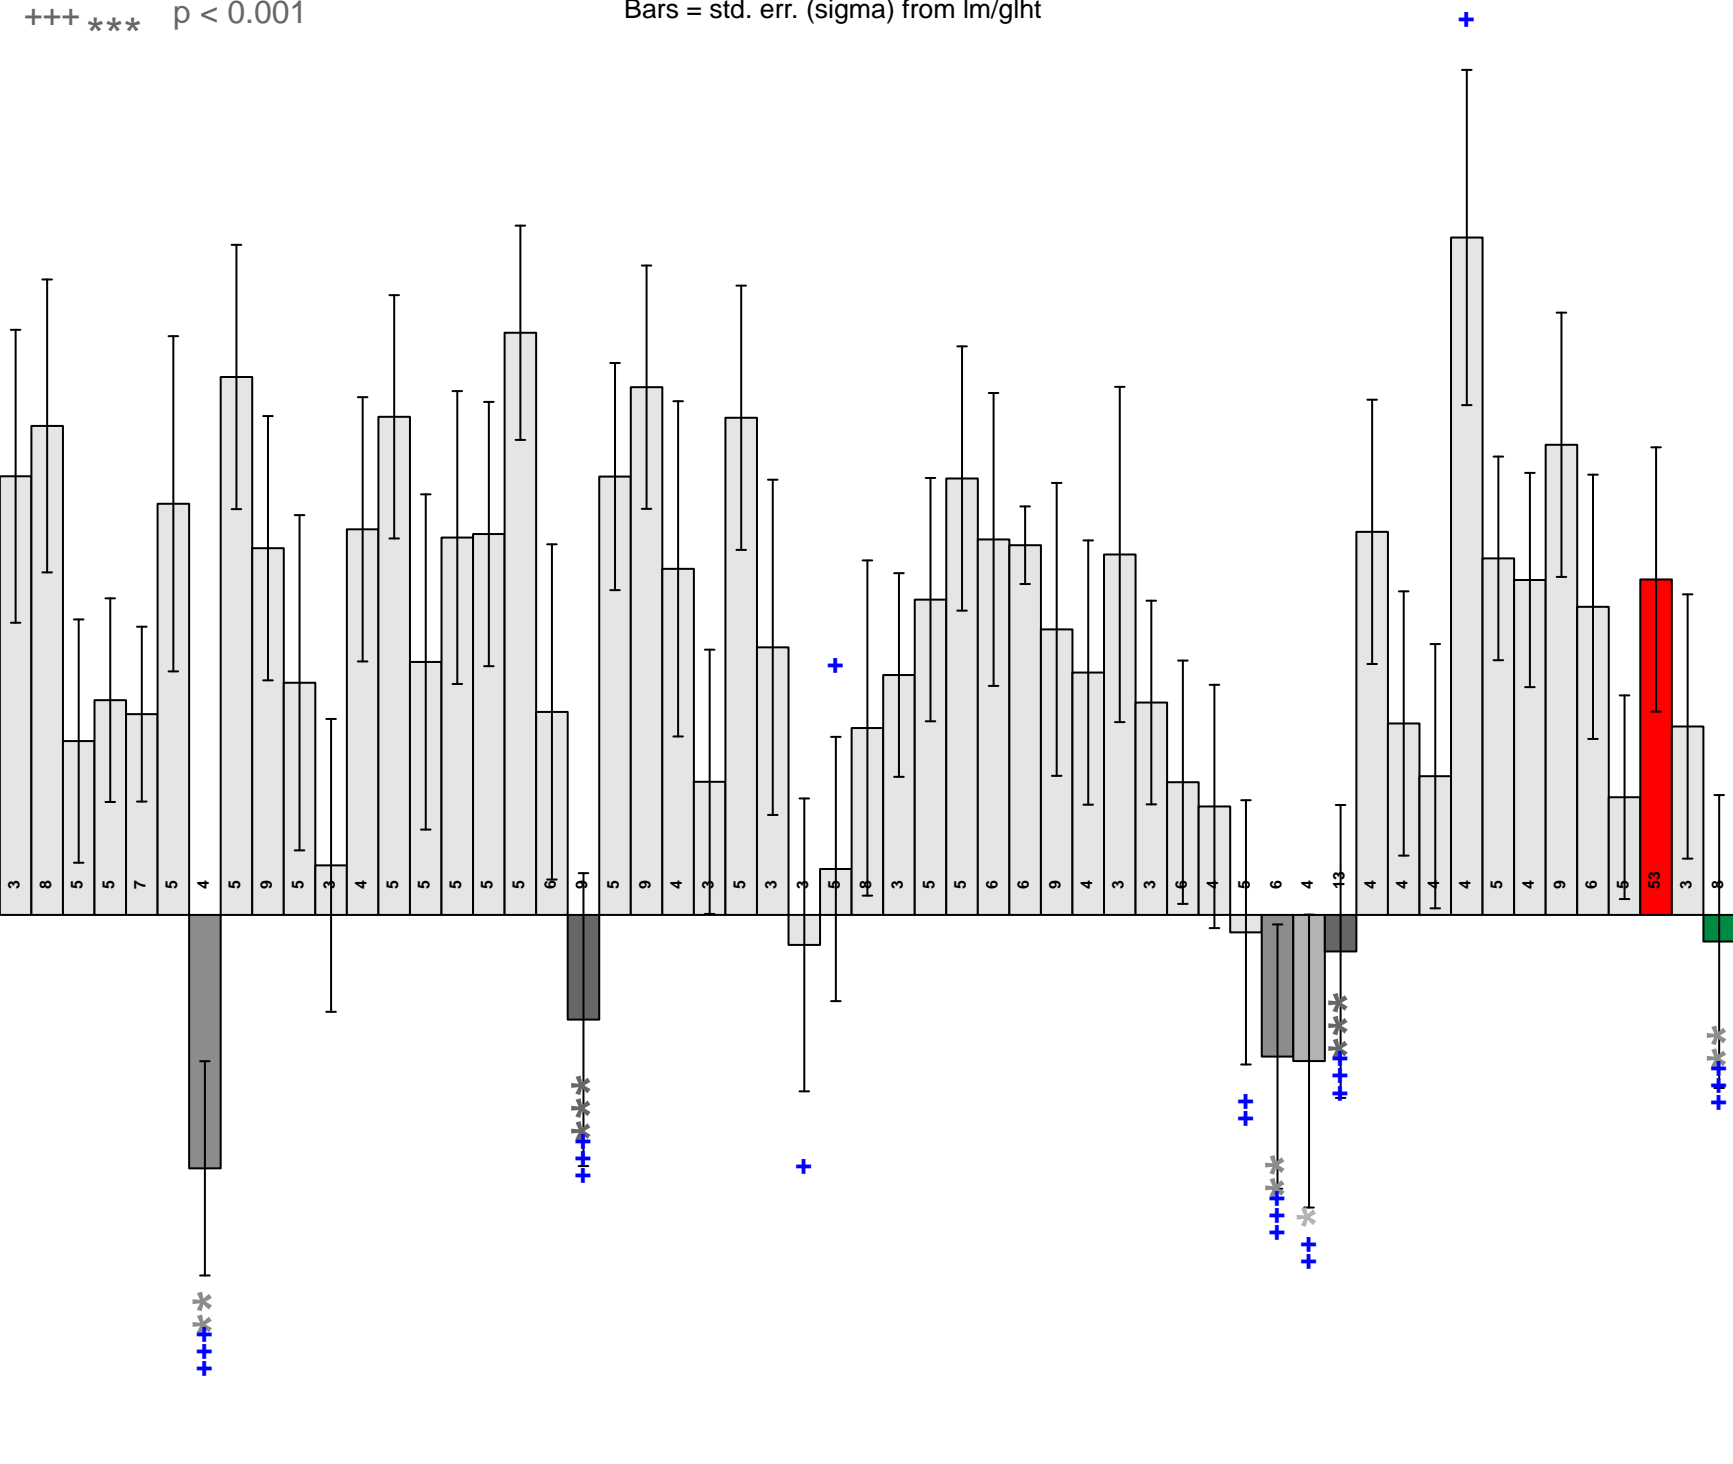

## Angle Away T12

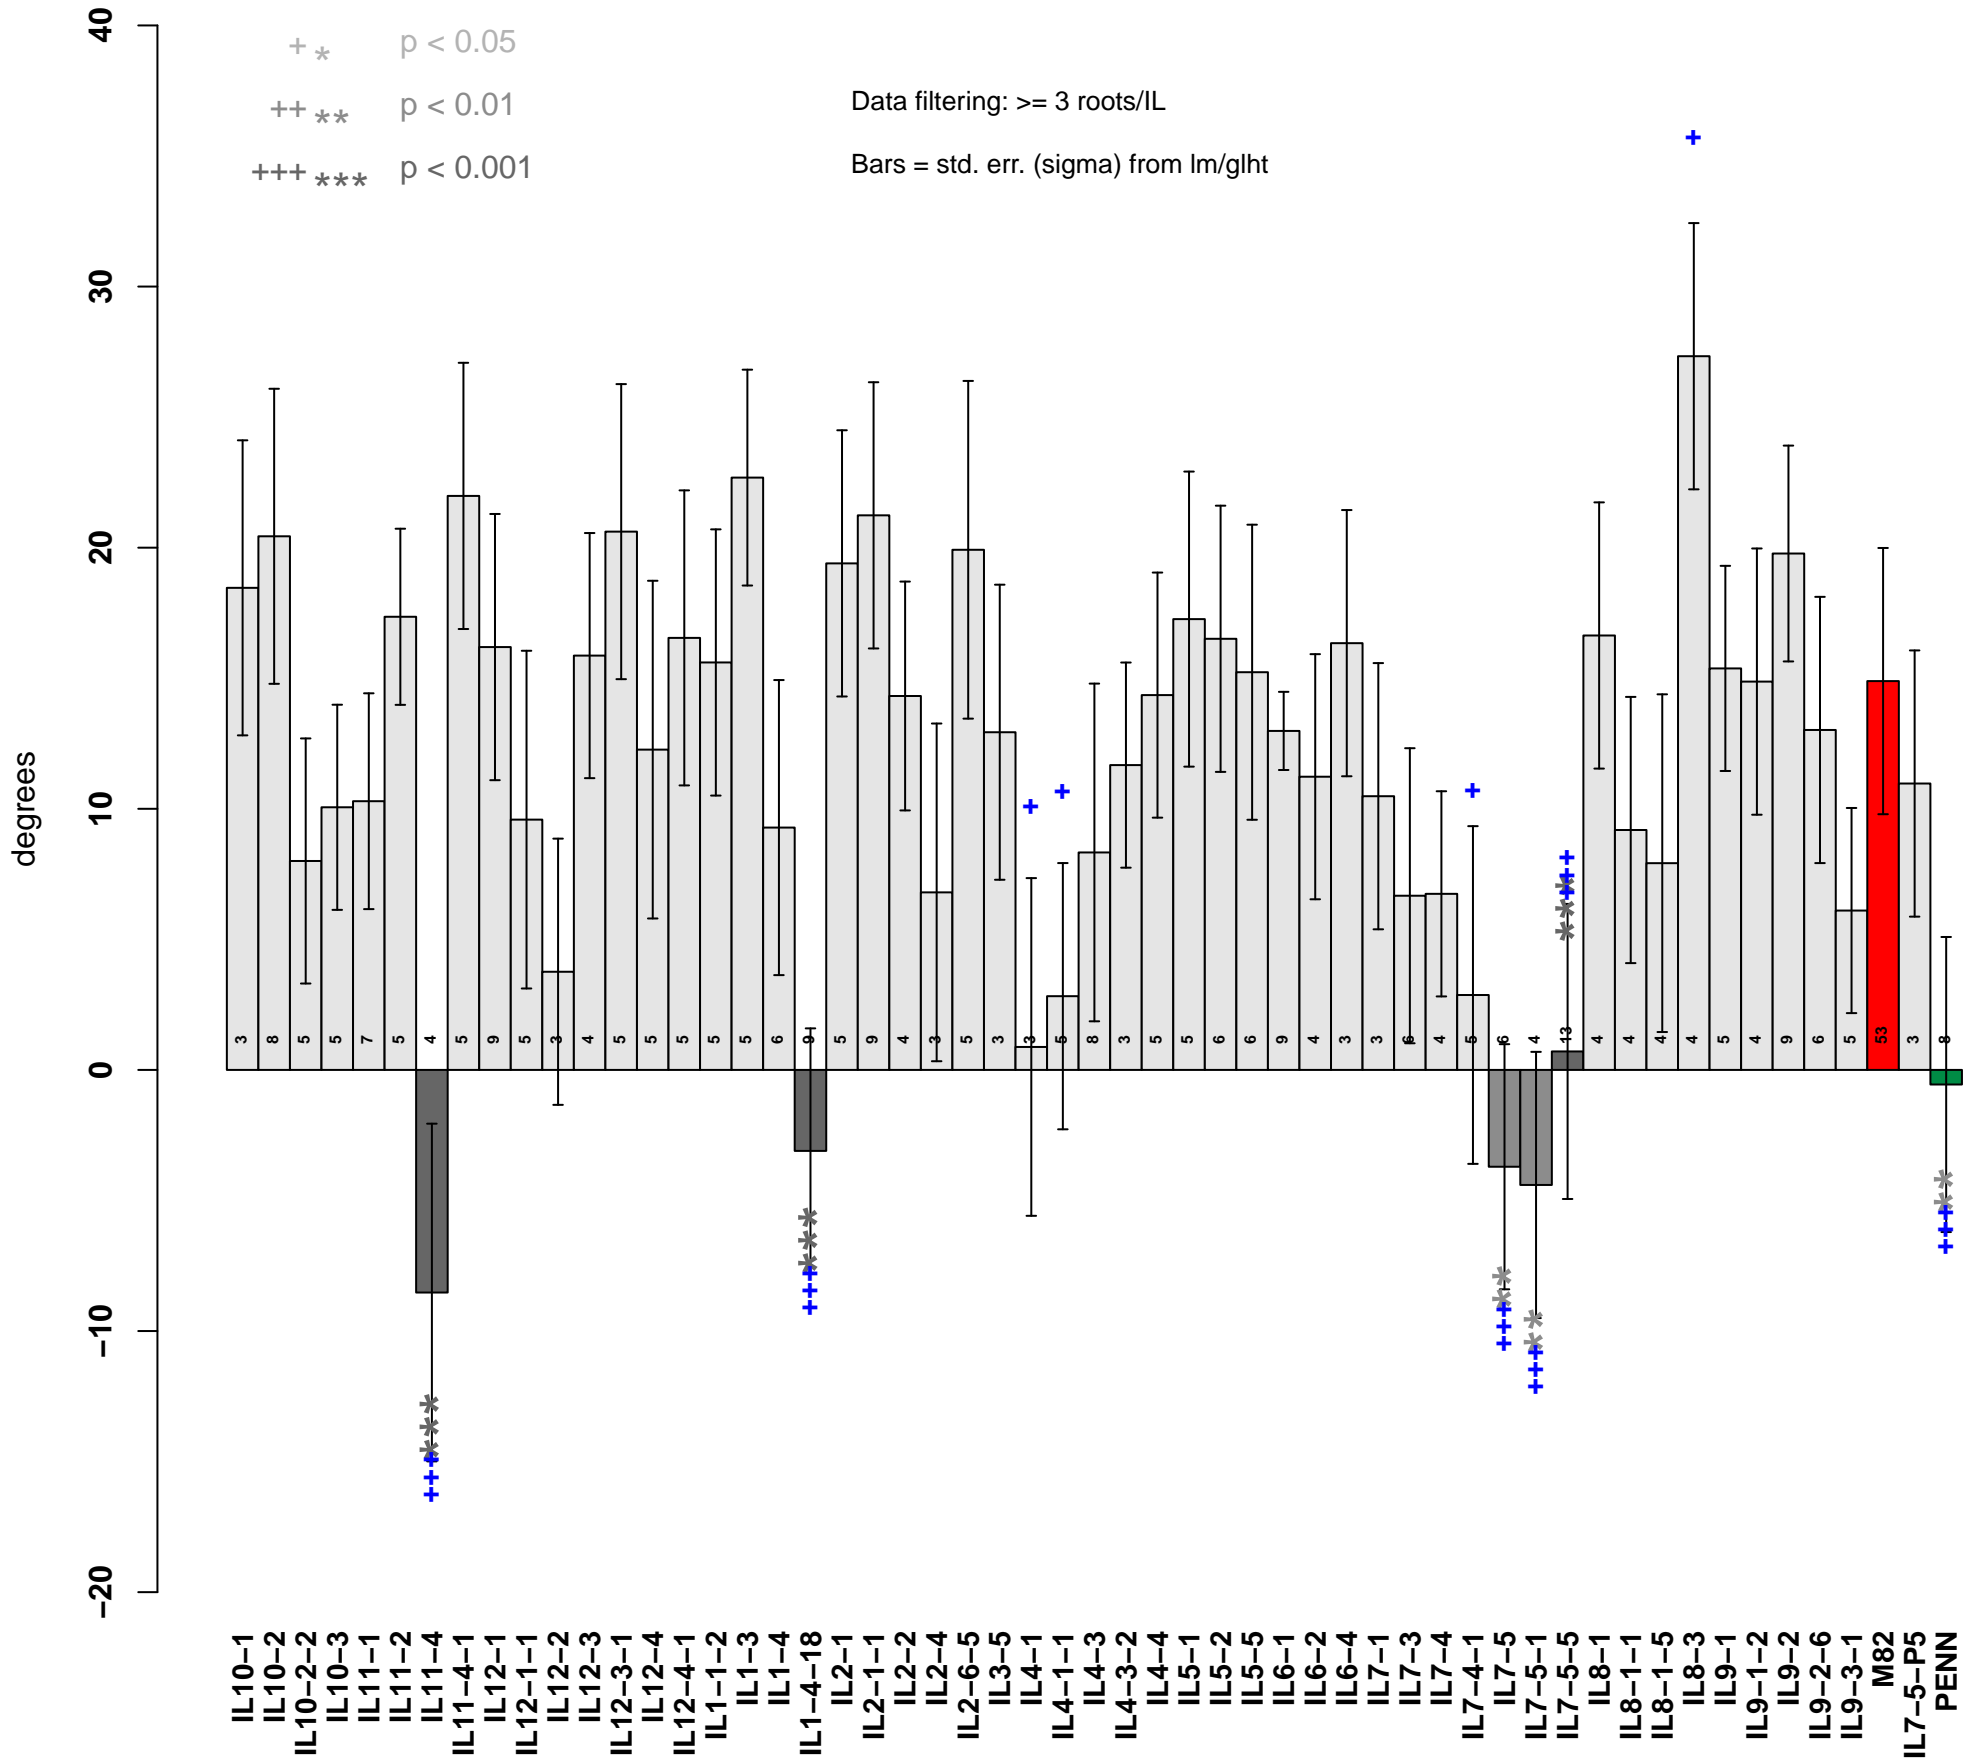

Angle Away T13

+ \*    p < 0.05  
++ \*\*    p < 0.01  
+++ \*\*\*    p < 0.001

Data filtering: >= 3 roots/IL

Bars = std. err. (sigma) from lm/glht

degrees

50  
40  
30  
20  
10  
0  
-10

IL10-1  
IL10-2  
IL10-2-2  
IL10-3  
IL11-1  
IL11-2  
IL11-4  
IL11-4-1  
IL12-1  
IL12-1-1  
IL12-2  
IL12-3  
IL12-3-1  
IL12-4  
IL12-4-1  
IL1-1-2  
IL1-3  
IL1-4  
IL1-4-18  
IL2-1  
IL2-1-1  
IL2-2  
IL2-4  
IL2-6-5  
IL3-5  
IL4-1  
IL4-1-1  
IL4-3  
IL4-3-2  
IL4-4  
IL5-1  
IL5-2  
IL5-5  
IL6-1  
IL6-2  
IL6-4  
IL7-1  
IL7-3  
IL7-4  
IL7-4-1  
IL7-5  
IL7-5-1  
IL7-5-5  
IL8-1  
IL8-1-1  
IL8-1-5  
IL8-3  
IL9-1  
IL9-1-2  
IL9-2  
IL9-2-6  
IL9-3-1  
M82  
IL7-5-P5  
PENN

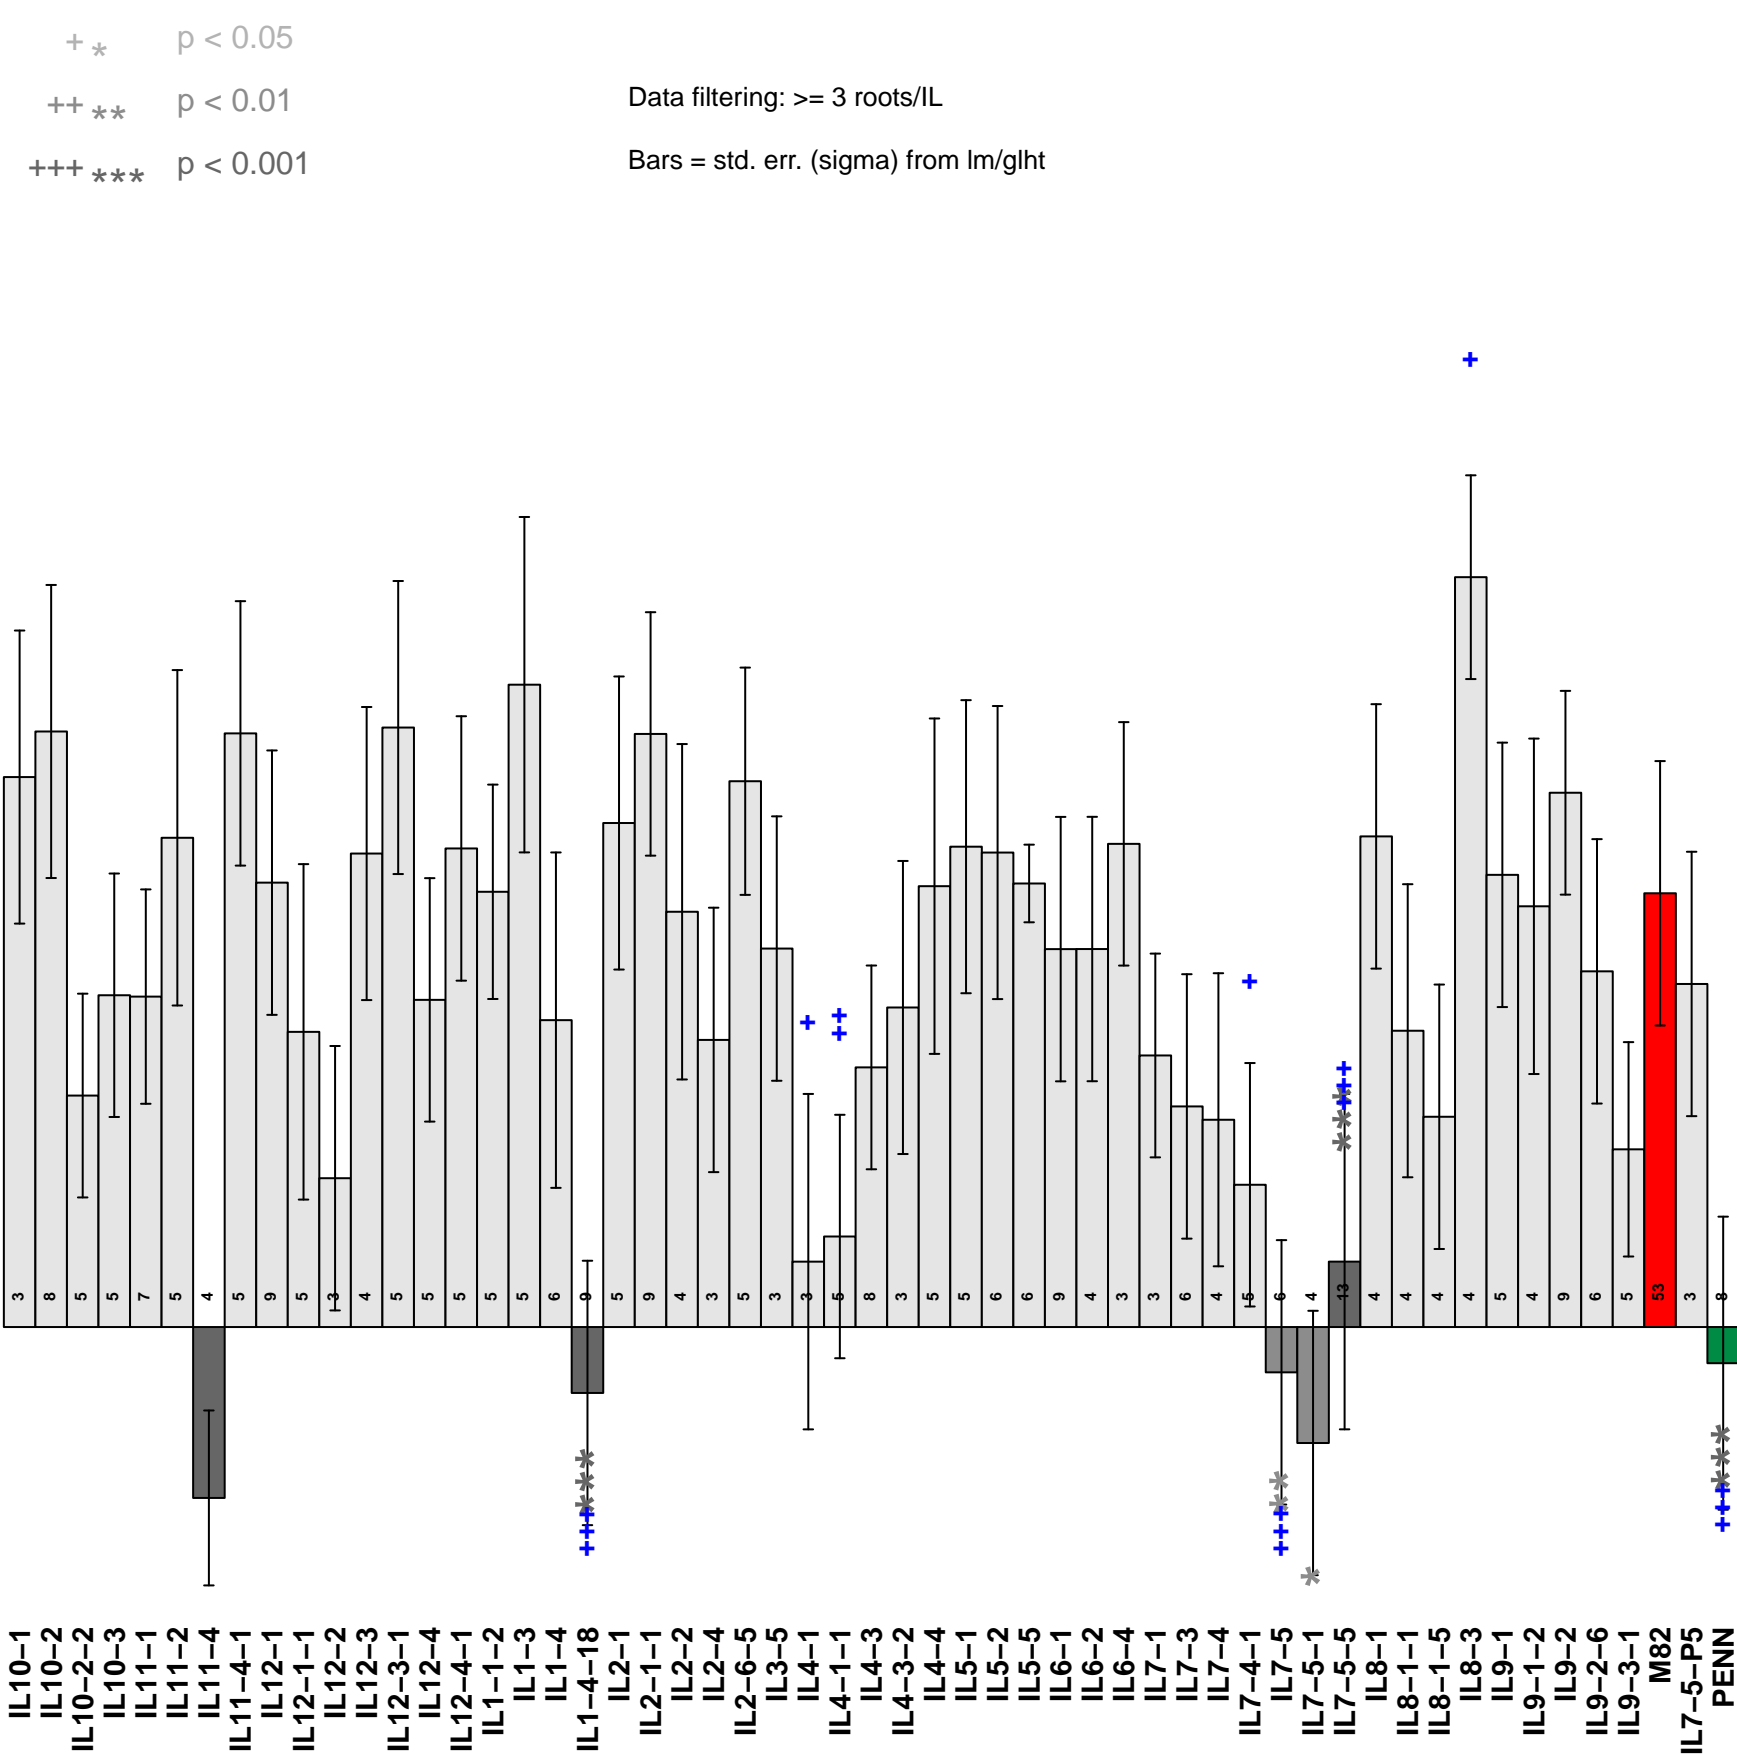

Angle Away T14

+ \*    p < 0.05  
++ \*\*    p < 0.01  
+++ \*\*\*    p < 0.001

Data filtering: >= 3 roots/IL

Bars = std. err. (sigma) from lm/glht

degrees

50  
40  
30  
20  
10  
0  
-10

IL10-1  
IL10-2  
IL10-2-2  
IL10-3  
IL11-1  
IL11-2  
IL11-4  
IL11-4-1  
IL12-1  
IL12-1-1  
IL12-2  
IL12-3  
IL12-3-1  
IL12-4  
IL12-4-1  
IL1-1-2  
IL1-3  
IL1-4  
IL1-4-18  
IL2-1  
IL2-1-1  
IL2-2  
IL2-4  
IL2-6-5  
IL3-5  
IL4-1  
IL4-1-1  
IL4-3  
IL4-3-2  
IL4-4  
IL5-1  
IL5-2  
IL5-5  
IL6-1  
IL6-2  
IL6-4  
IL7-1  
IL7-3  
IL7-4  
IL7-4-1  
IL7-5  
IL7-5-1  
IL7-5-5  
IL8-1  
IL8-1-1  
IL8-1-5  
IL8-3  
IL9-1  
IL9-1-2  
IL9-2  
IL9-2-6  
IL9-3-1  
M82  
IL7-5-P5  
PENN

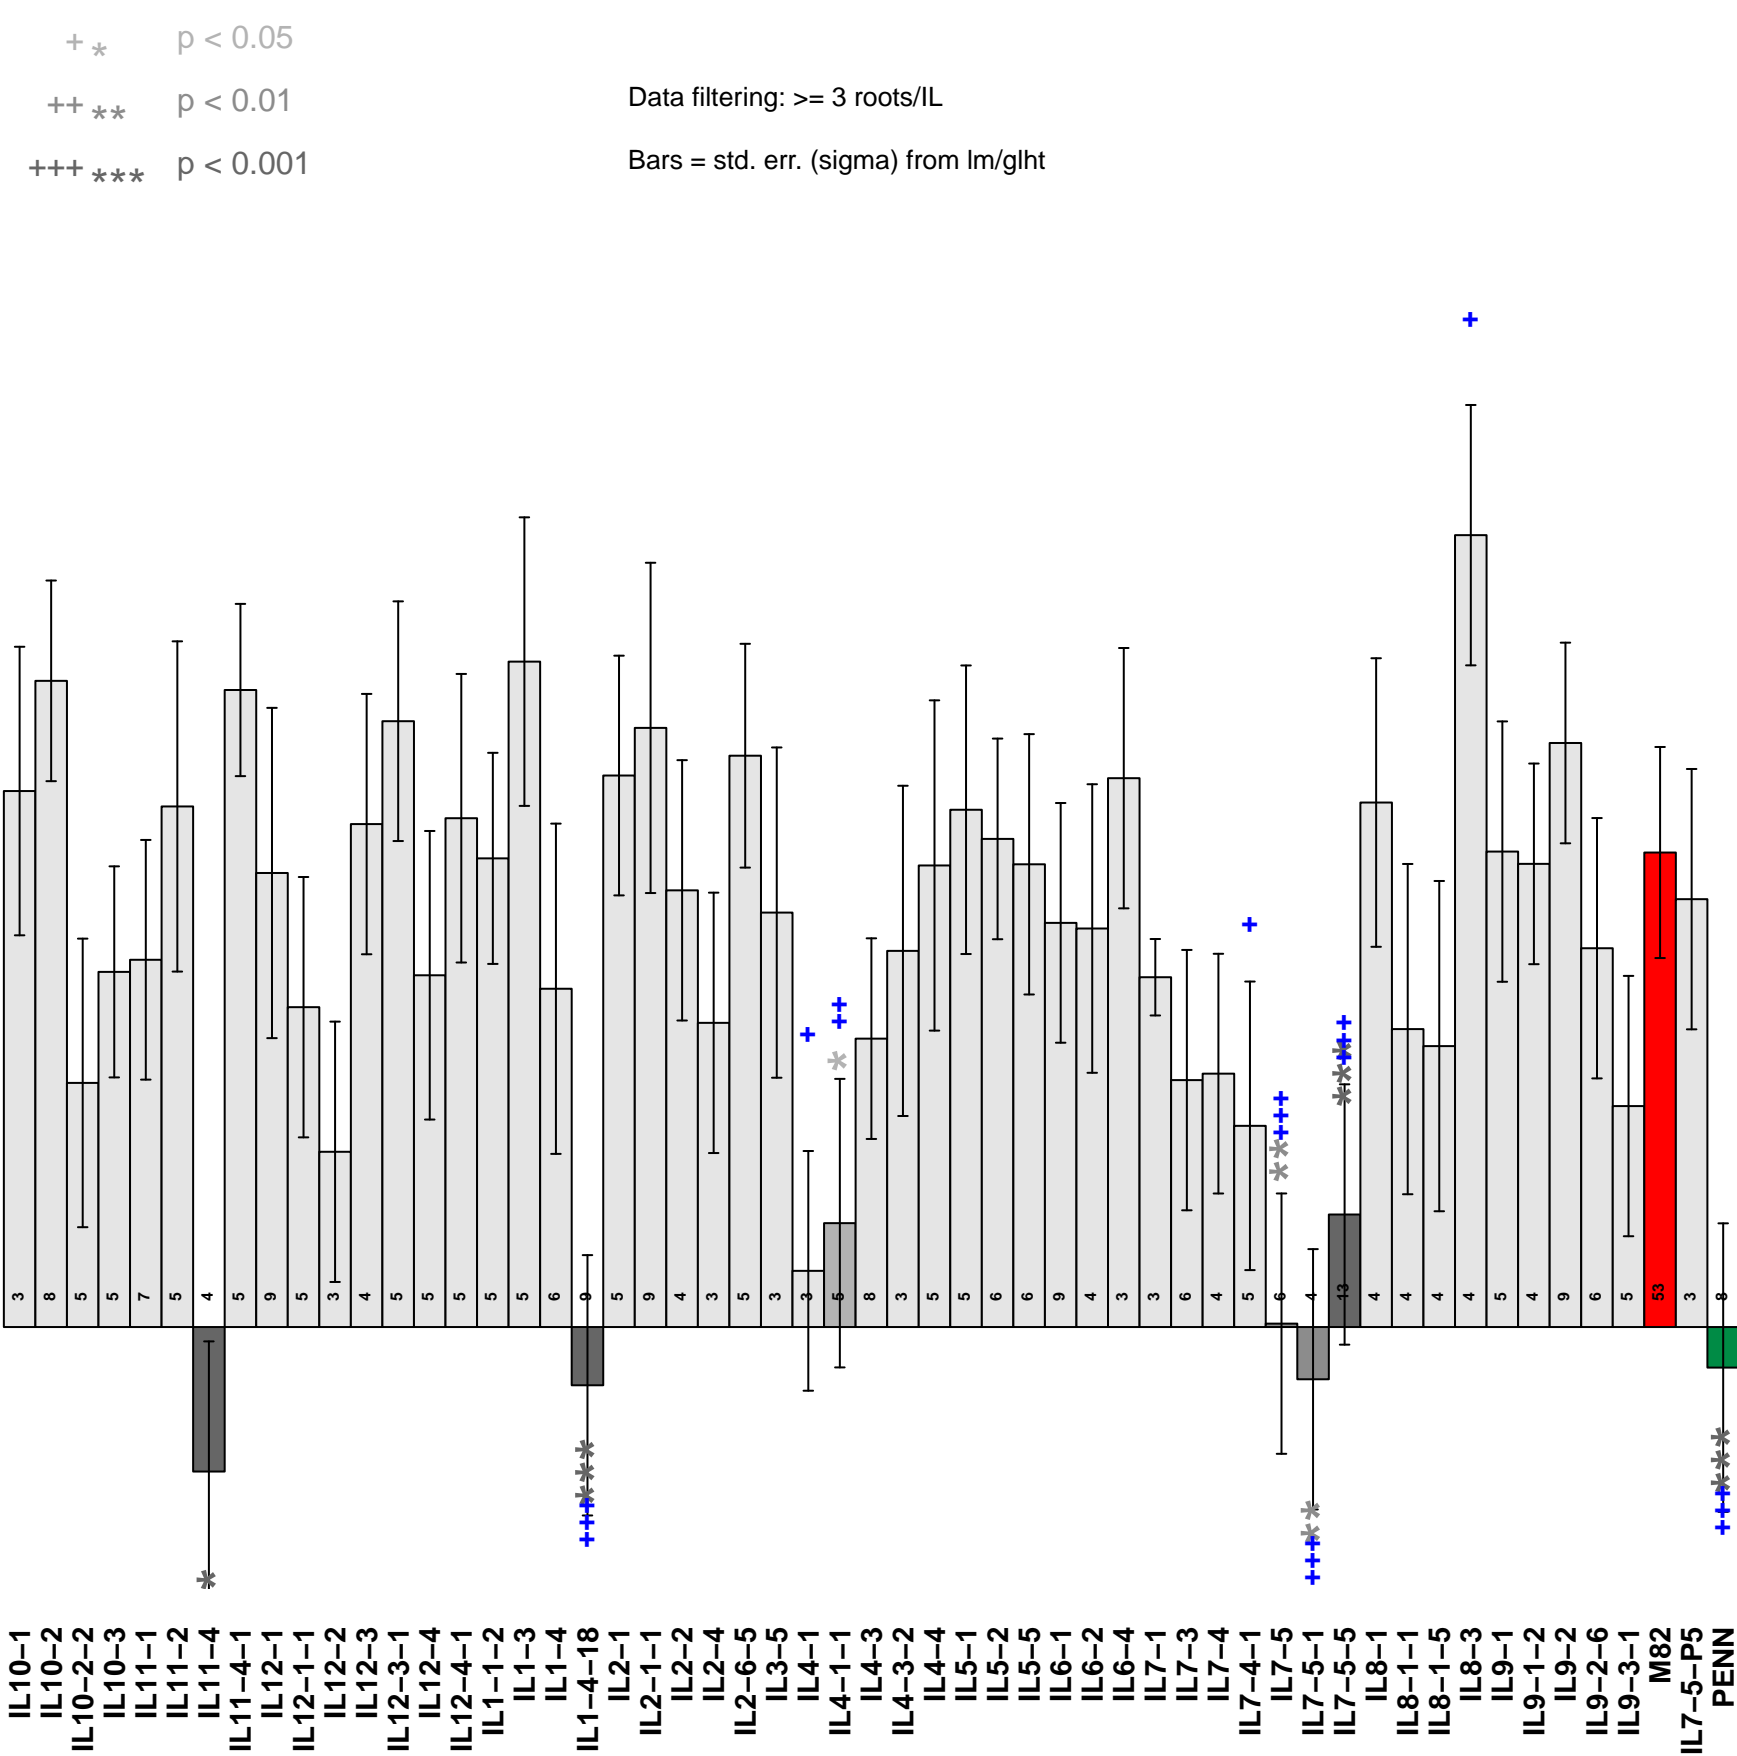

Angle Away T15

+ \*    p < 0.05  
++ \*\*    p < 0.01  
+++ \*\*\*    p < 0.001

Data filtering: >= 3 roots/IL

Bars = std. err. (sigma) from lm/glht

degrees

50  
40  
30  
20  
10  
0  
-10

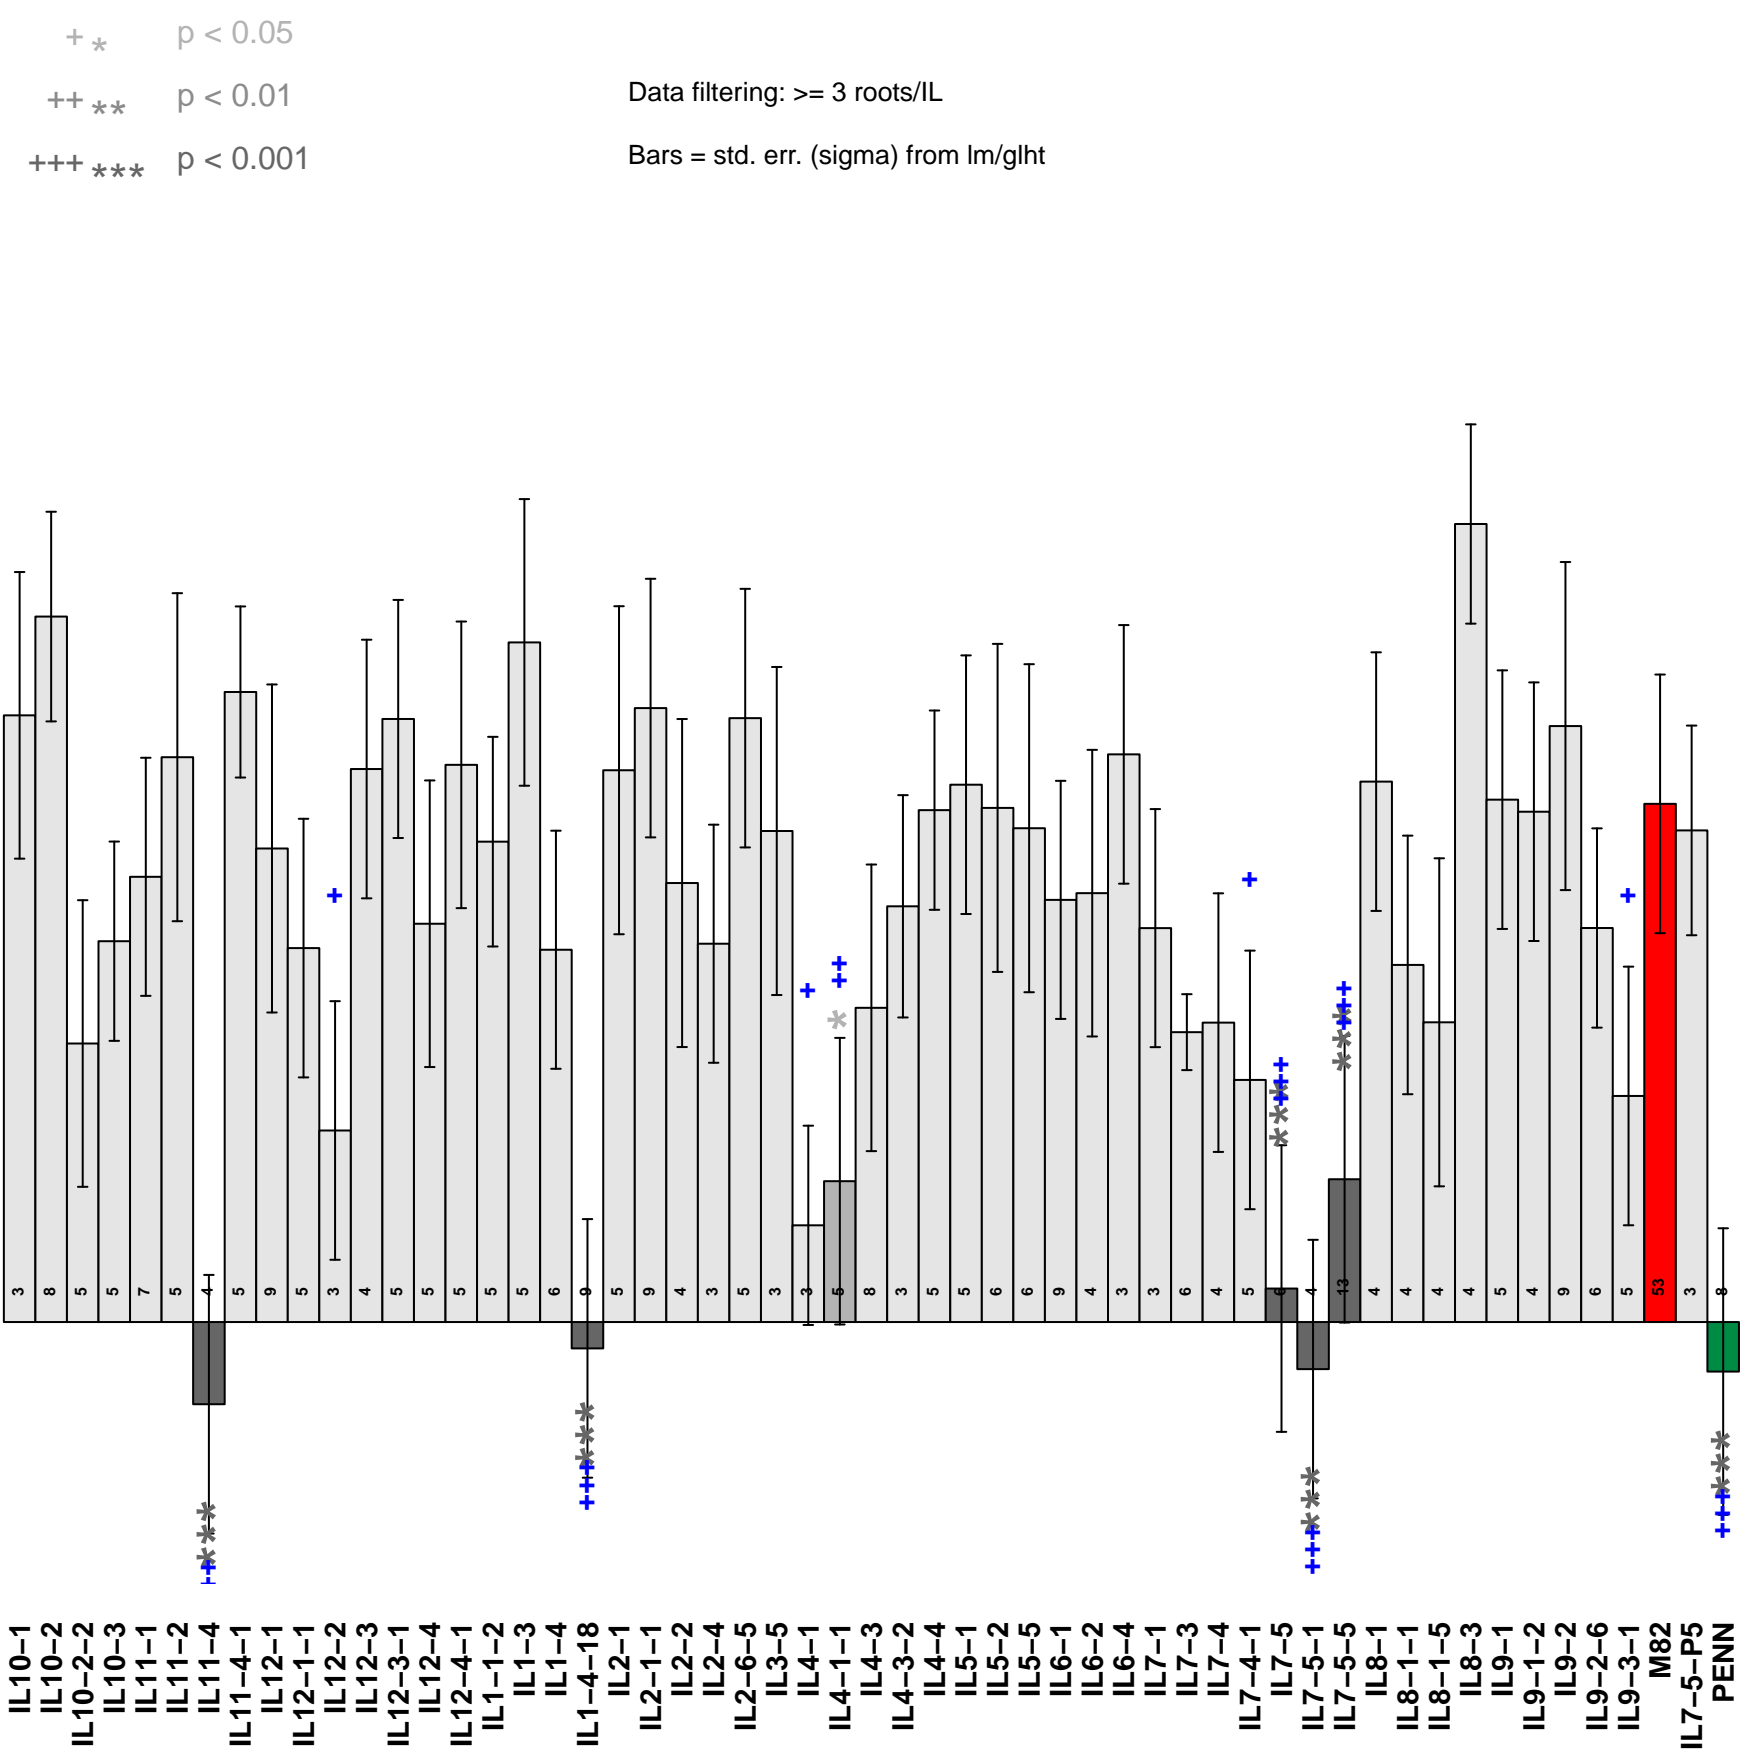



Angle Away T16

+ \*    p < 0.05  
++ \*\*    p < 0.01  
+++ \*\*\*    p < 0.001

Data filtering: >= 3 roots/IL

Bars = std. err. (sigma) from lm/glht

degrees

50  
40  
30  
20  
10  
0  
-10

IL10-1  
IL10-2  
IL10-2-2  
IL10-3  
IL11-1  
IL11-2  
IL11-4  
IL11-4-1  
IL12-1  
IL12-1-1  
IL12-2  
IL12-3  
IL12-3-1  
IL12-4  
IL12-4-1  
IL1-1-2  
IL1-3  
IL1-4  
IL1-4-18  
IL2-1  
IL2-1-1  
IL2-2  
IL2-4  
IL2-6-5  
IL3-5  
IL4-1  
IL4-1-1  
IL4-3  
IL4-3-2  
IL4-4  
IL5-1  
IL5-2  
IL5-5  
IL6-1  
IL6-2  
IL6-4  
IL7-1  
IL7-3  
IL7-4  
IL7-4-1  
IL7-5  
IL7-5-1  
IL7-5-5  
IL8-1  
IL8-1-1  
IL8-1-5  
IL8-3  
IL9-1  
IL9-1-2  
IL9-2  
IL9-2-6  
IL9-3-1  
M82  
IL7-5-P5  
PENN

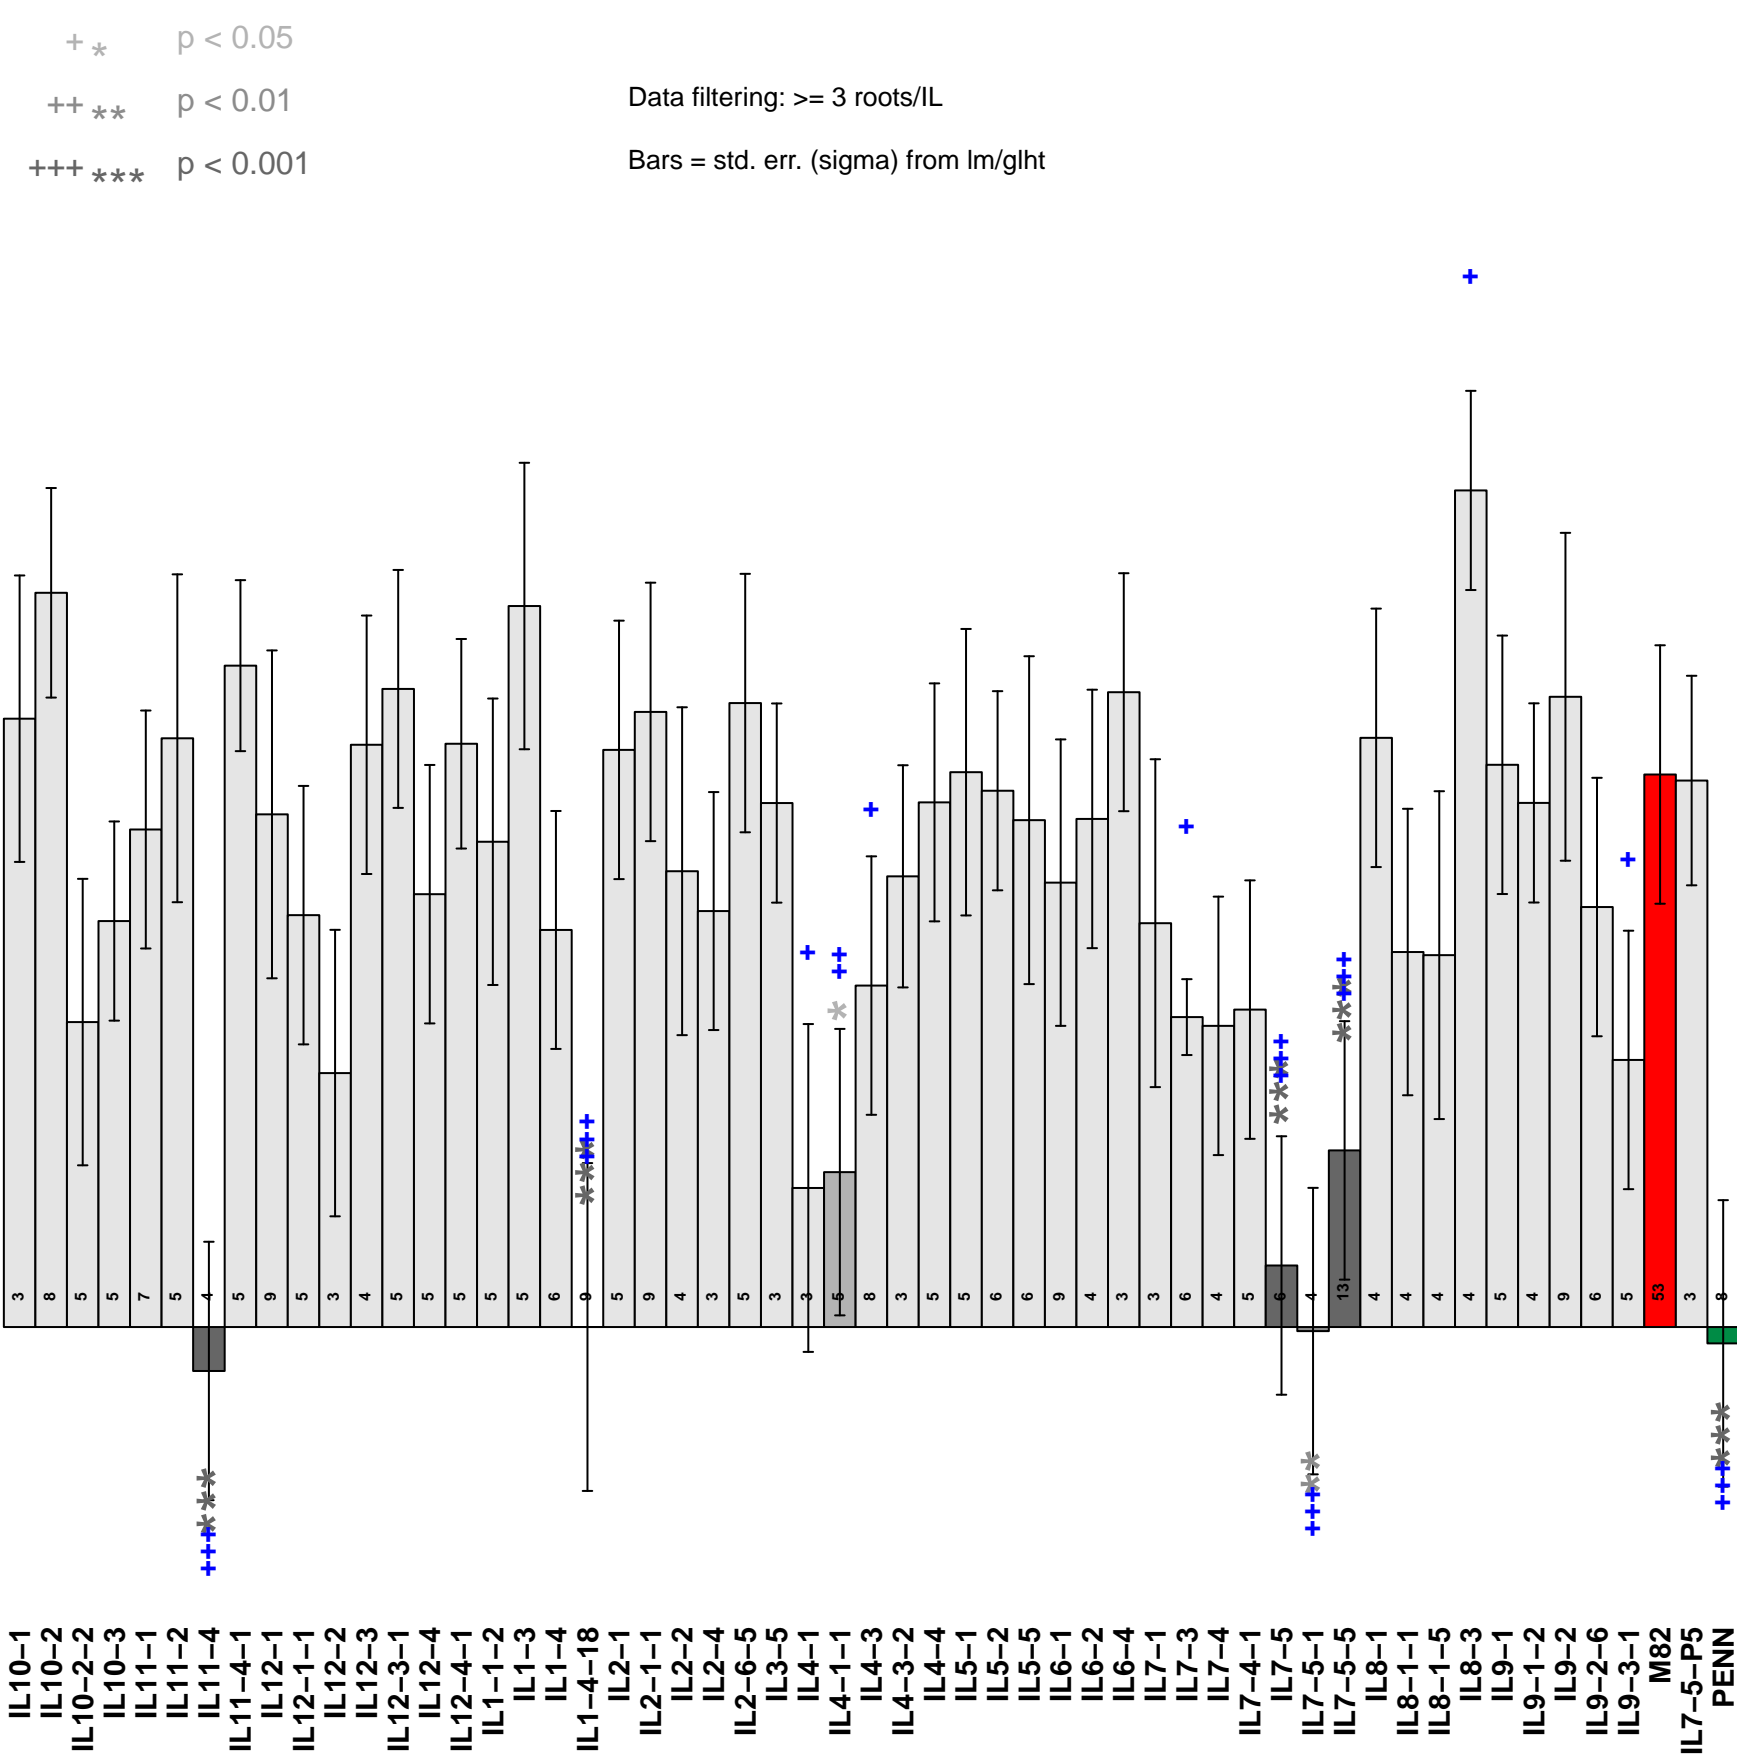

Angle Away T17

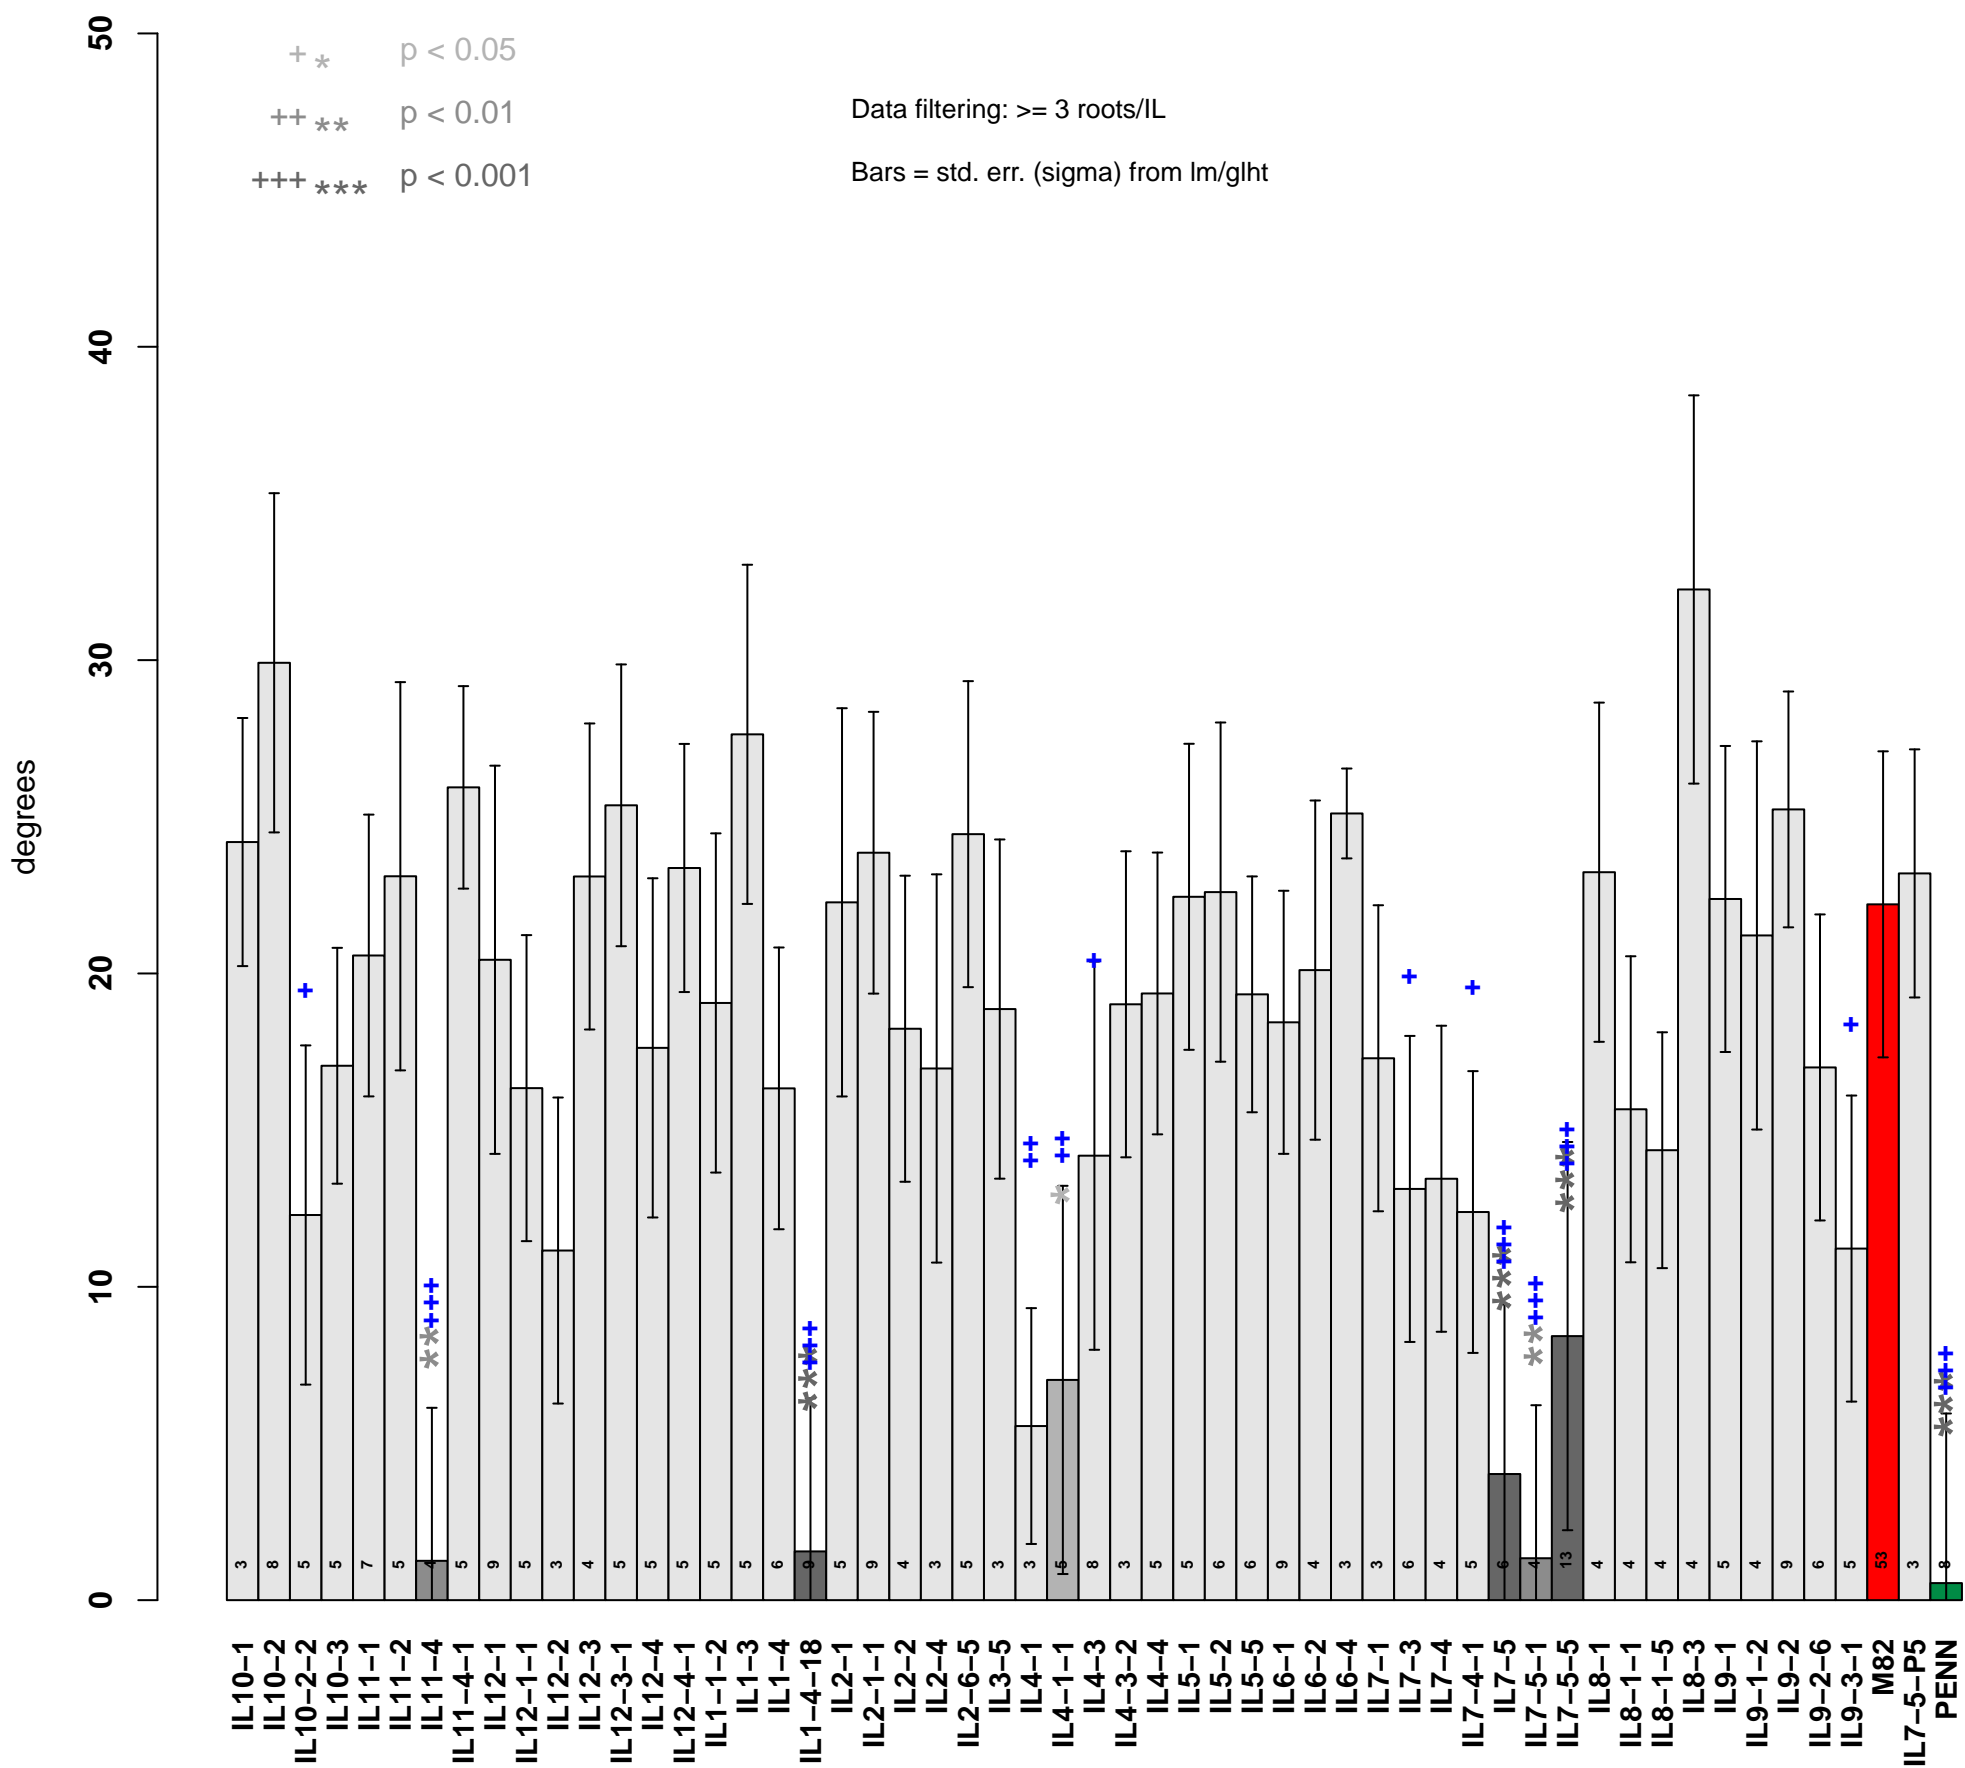

Angle Away T18

+ \*    p < 0.05  
++ \*\*    p < 0.01  
+++ \*\*\*    p < 0.001

Data filtering: >= 3 roots/IL

Bars = std. err. (sigma) from lm/glht

degrees

50  
40  
30  
20  
10  
0

IL10-1  
IL10-2  
IL10-2-2  
IL10-3  
IL11-1  
IL11-2  
IL11-4  
IL11-4-1  
IL12-1  
IL12-1-1  
IL12-2  
IL12-3  
IL12-3-1  
IL12-4  
IL12-4-1  
IL1-1-2  
IL1-3  
IL1-4  
IL1-4-18  
IL2-1  
IL2-1-1  
IL2-2  
IL2-4  
IL2-6-5  
IL3-5  
IL4-1  
IL4-1-1  
IL4-3  
IL4-3-2  
IL4-4  
IL5-1  
IL5-2  
IL5-5  
IL6-1  
IL6-2  
IL6-4  
IL7-1  
IL7-3  
IL7-4  
IL7-4-1  
IL7-5  
IL7-5-1  
IL7-5-5  
IL8-1  
IL8-1-1  
IL8-1-5  
IL8-3  
IL9-1  
IL9-1-2  
IL9-2  
IL9-2-6  
IL9-3-1  
M82  
IL7-5-P5  
PENN

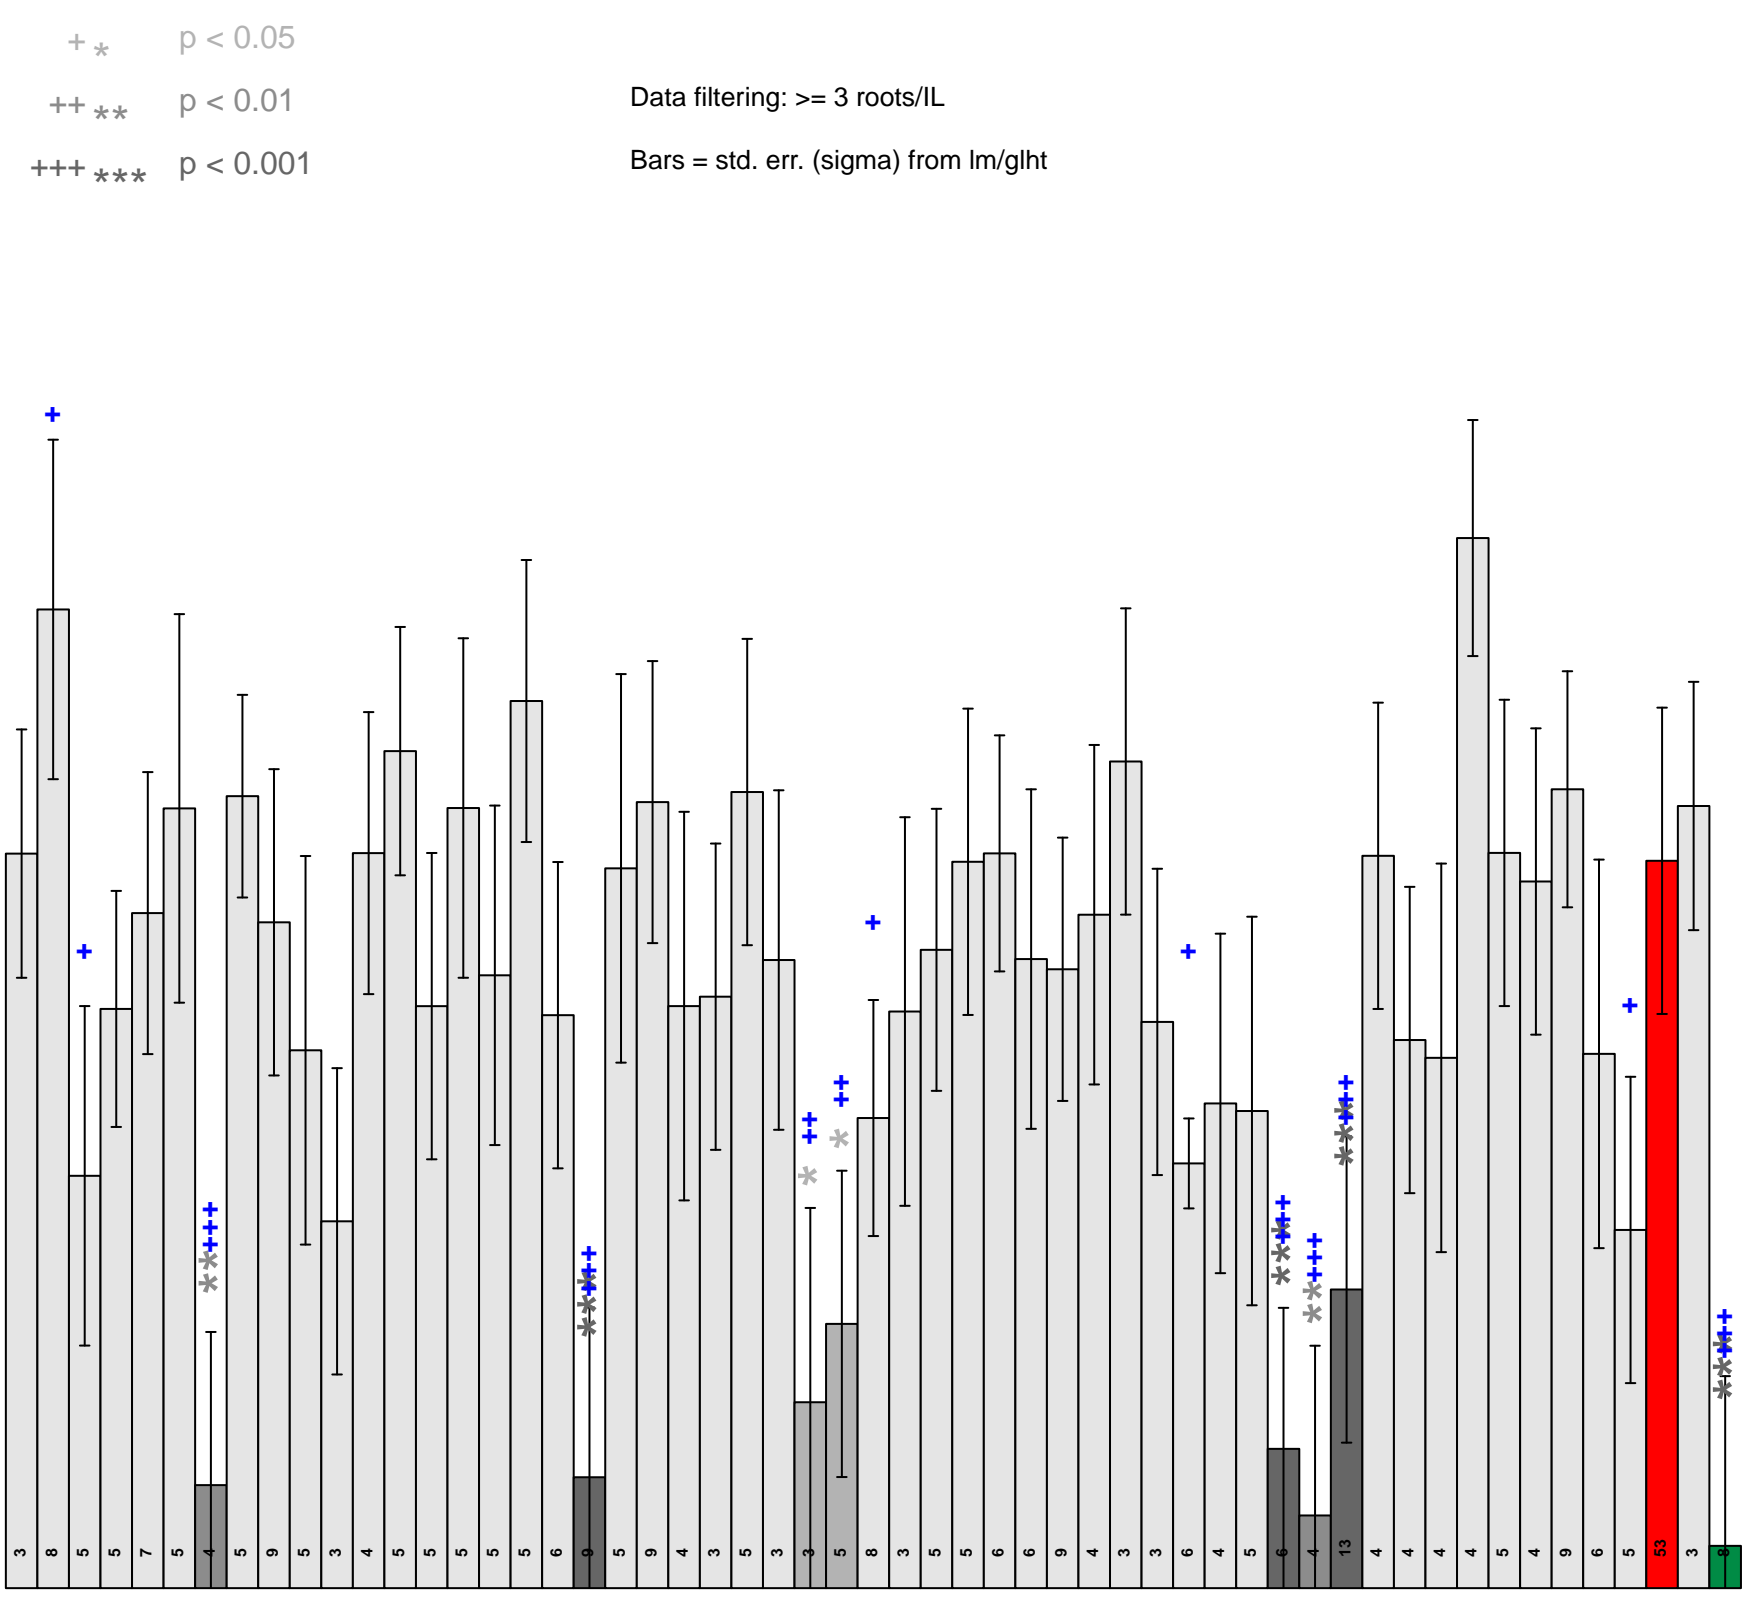

Angle Away T19

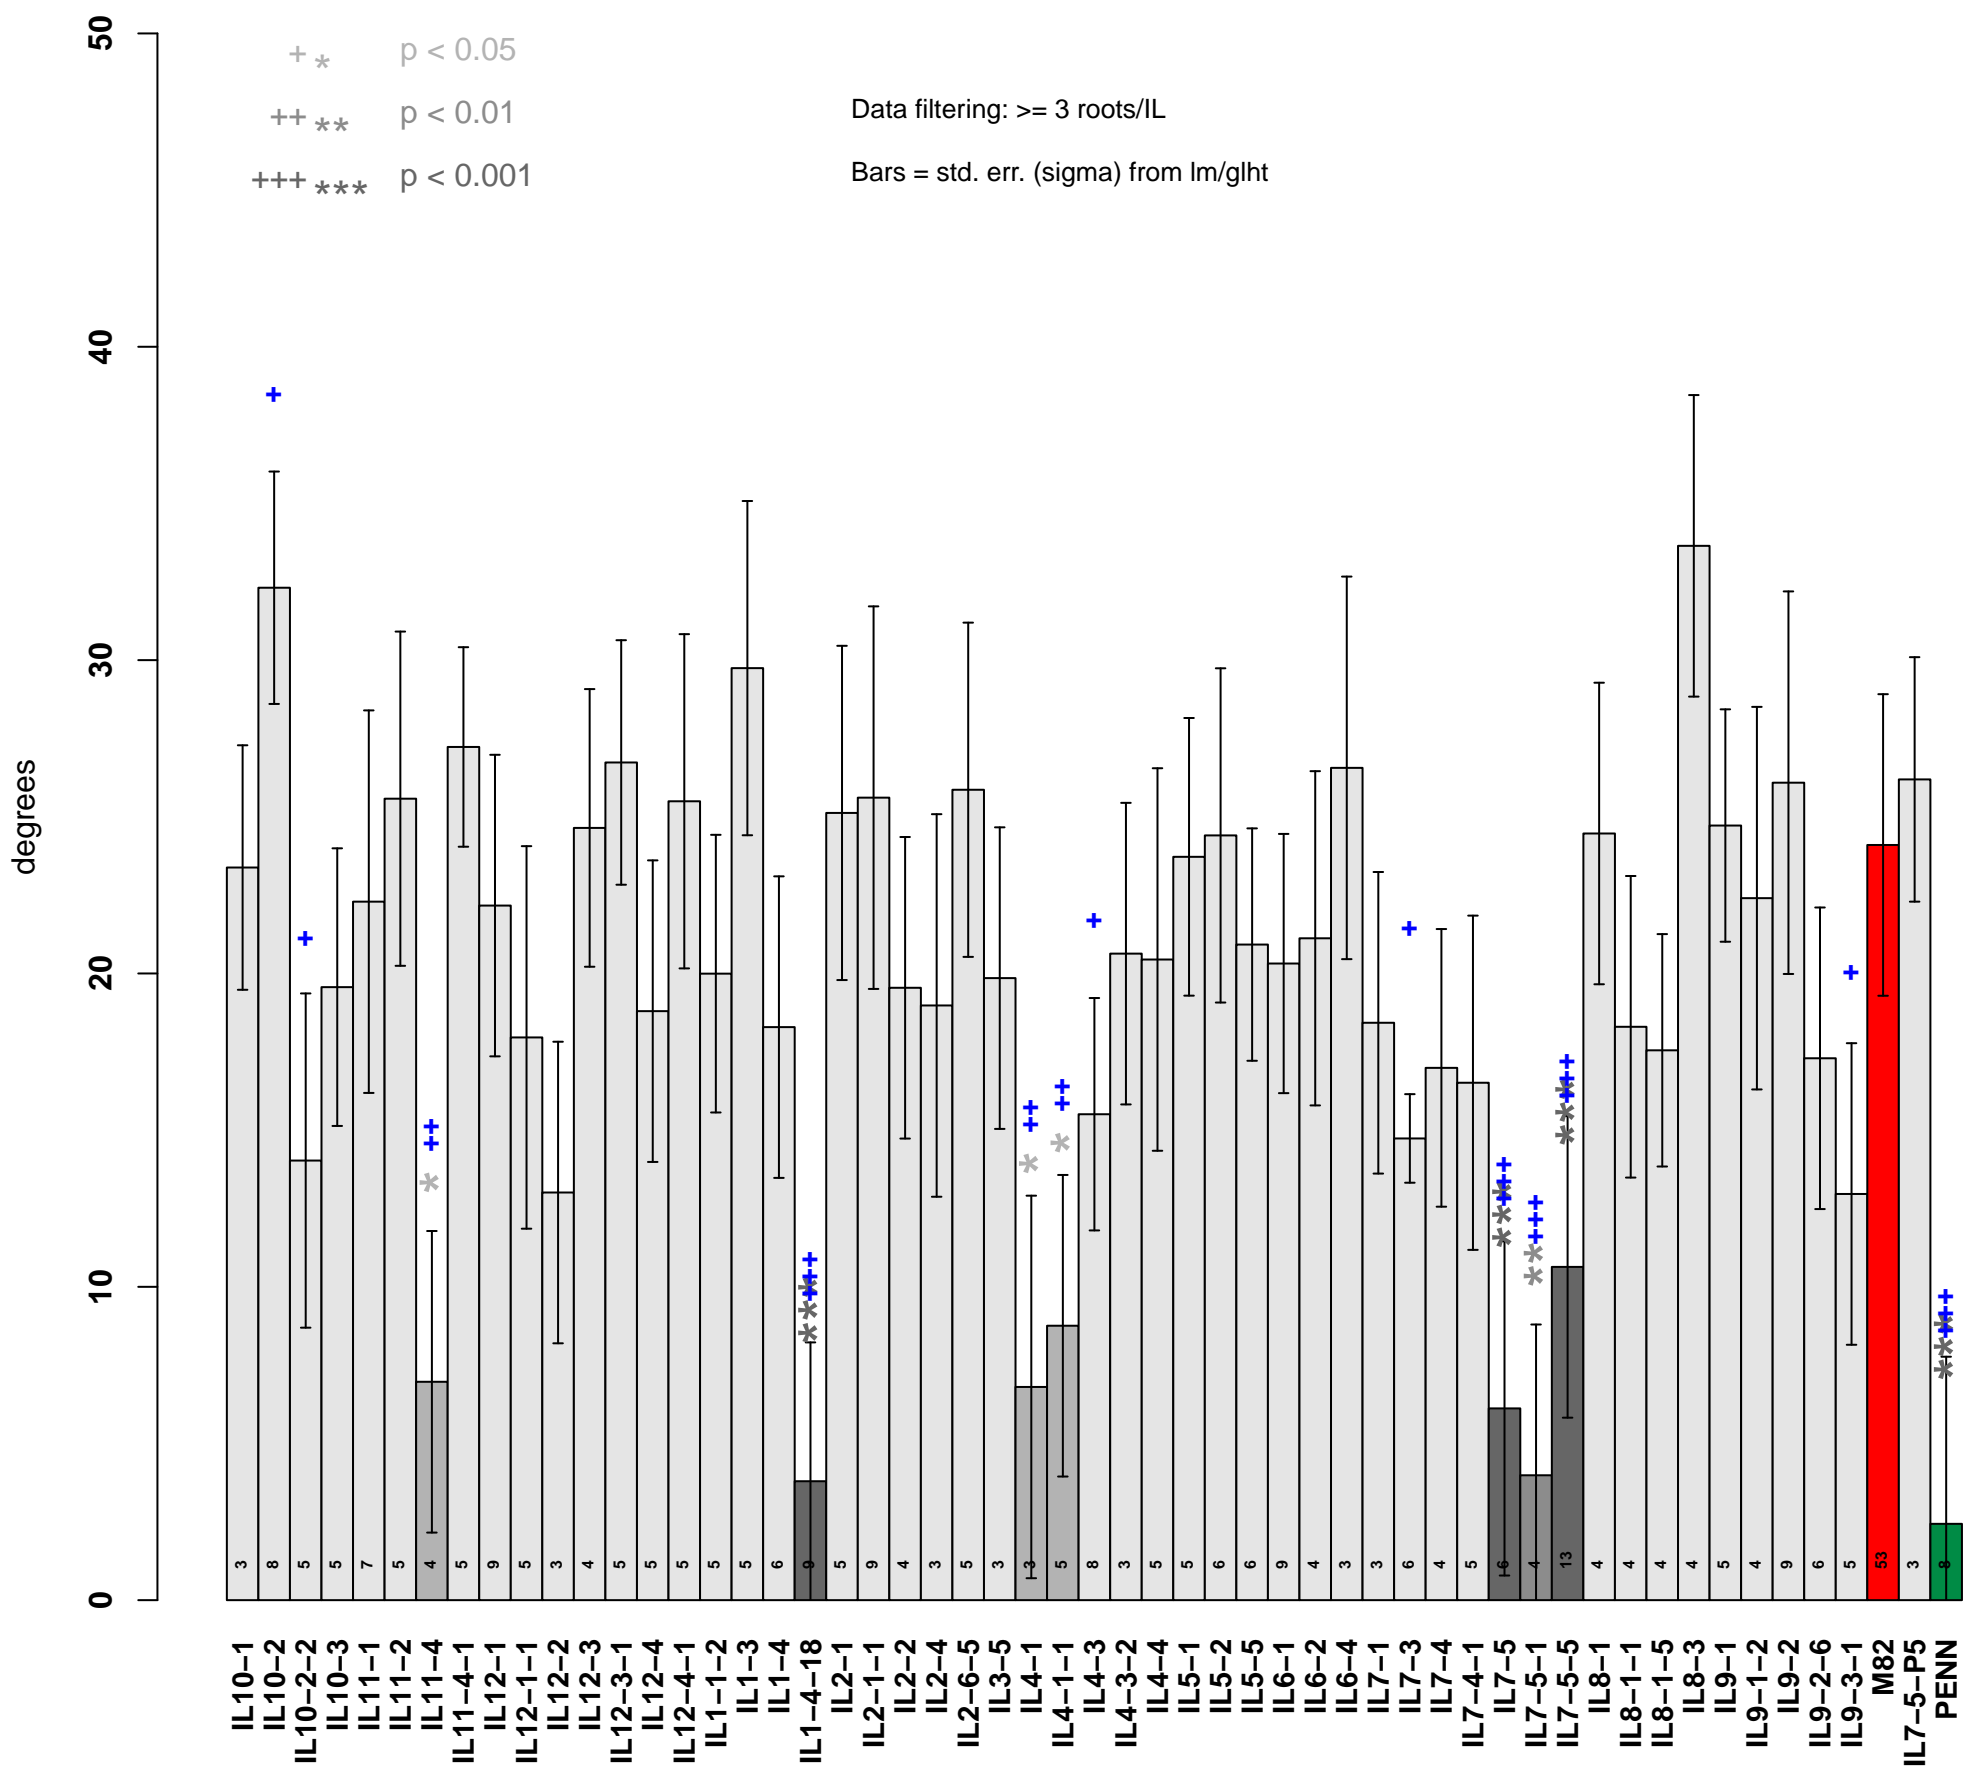

Angle Away T20

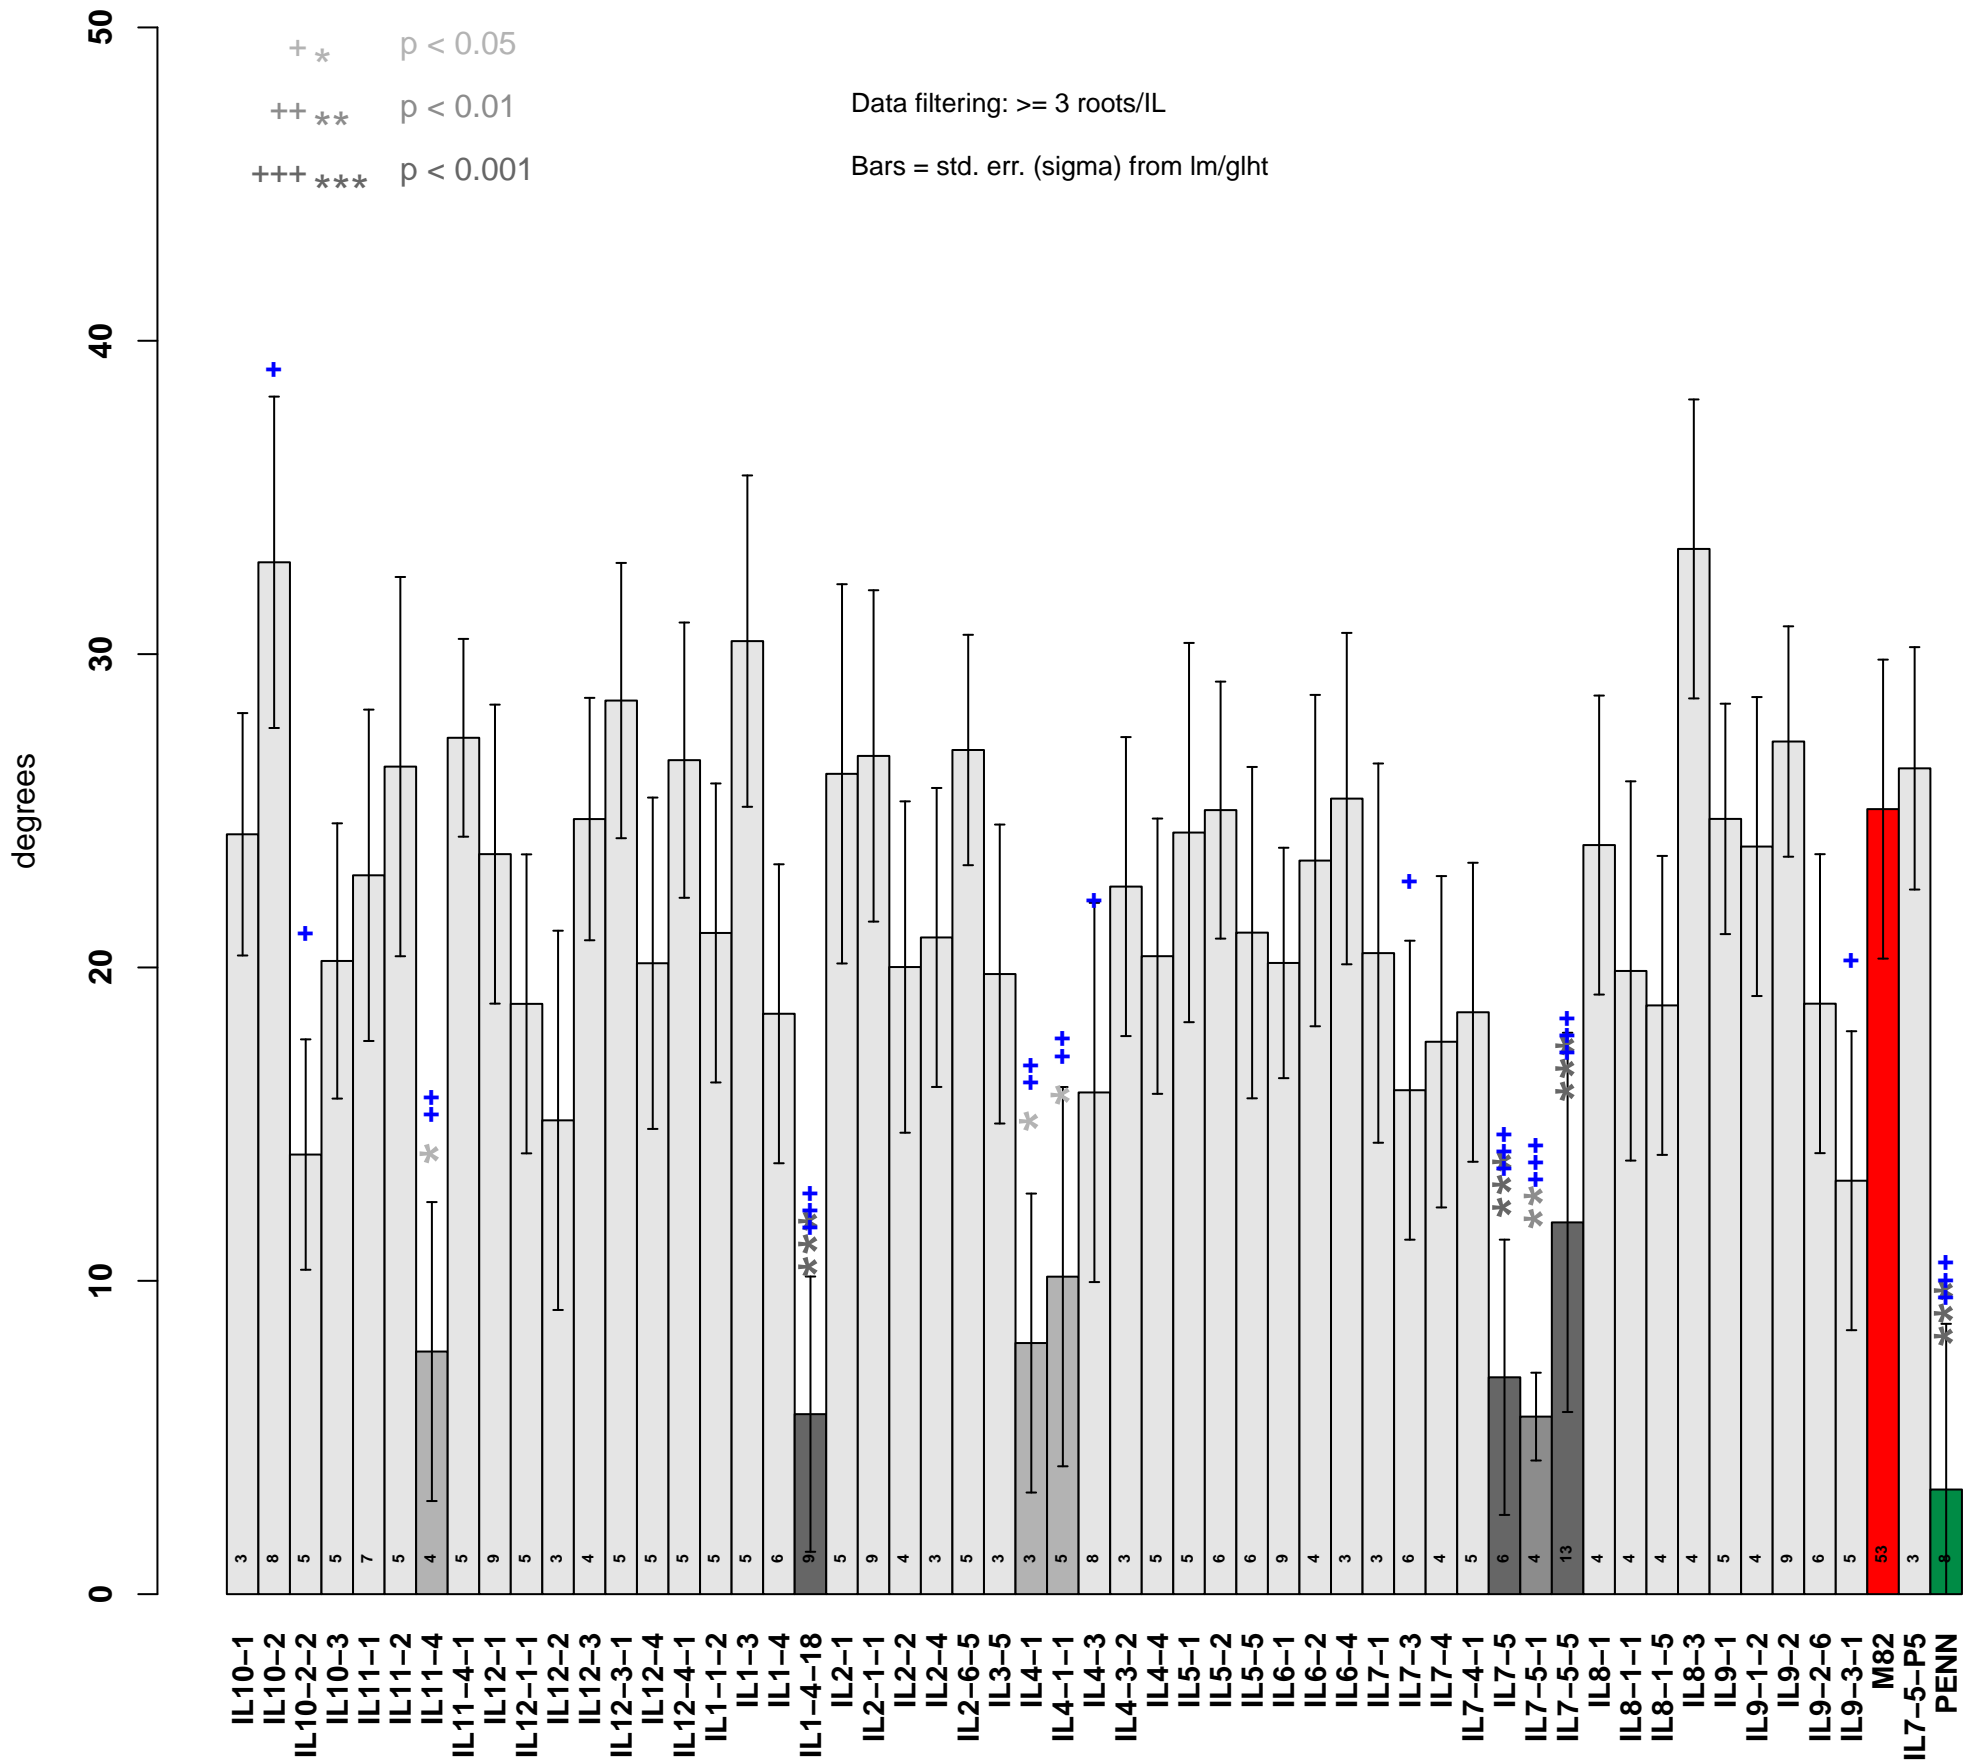

Angle Away T21

+ \*    p < 0.05  
++ \*\*    p < 0.01  
+++ \*\*\*    p < 0.001

Data filtering: >= 3 roots/IL

Bars = std. err. (sigma) from lm/glht

degrees

50  
40  
30  
20  
10  
0

IL10-1  
IL10-2  
IL10-2-2  
IL10-3  
IL11-1  
IL11-2  
IL11-4  
IL11-4-1  
IL12-1  
IL12-1-1  
IL12-2  
IL12-3  
IL12-3-1  
IL12-4  
IL12-4-1  
IL1-1-2  
IL1-3  
IL1-4  
IL1-4-18  
IL2-1  
IL2-1-1  
IL2-2  
IL2-4  
IL2-6-5  
IL3-5  
IL4-1  
IL4-1-1  
IL4-3  
IL4-3-2  
IL4-4  
IL5-1  
IL5-2  
IL5-5  
IL6-1  
IL6-2  
IL6-4  
IL7-1  
IL7-3  
IL7-4  
IL7-4-1  
IL7-5  
IL7-5-1  
IL7-5-5  
IL8-1  
IL8-1-1  
IL8-1-5  
IL8-3  
IL9-1  
IL9-1-2  
IL9-2  
IL9-2-6  
IL9-3-1  
M82  
IL7-5-P5  
PENN

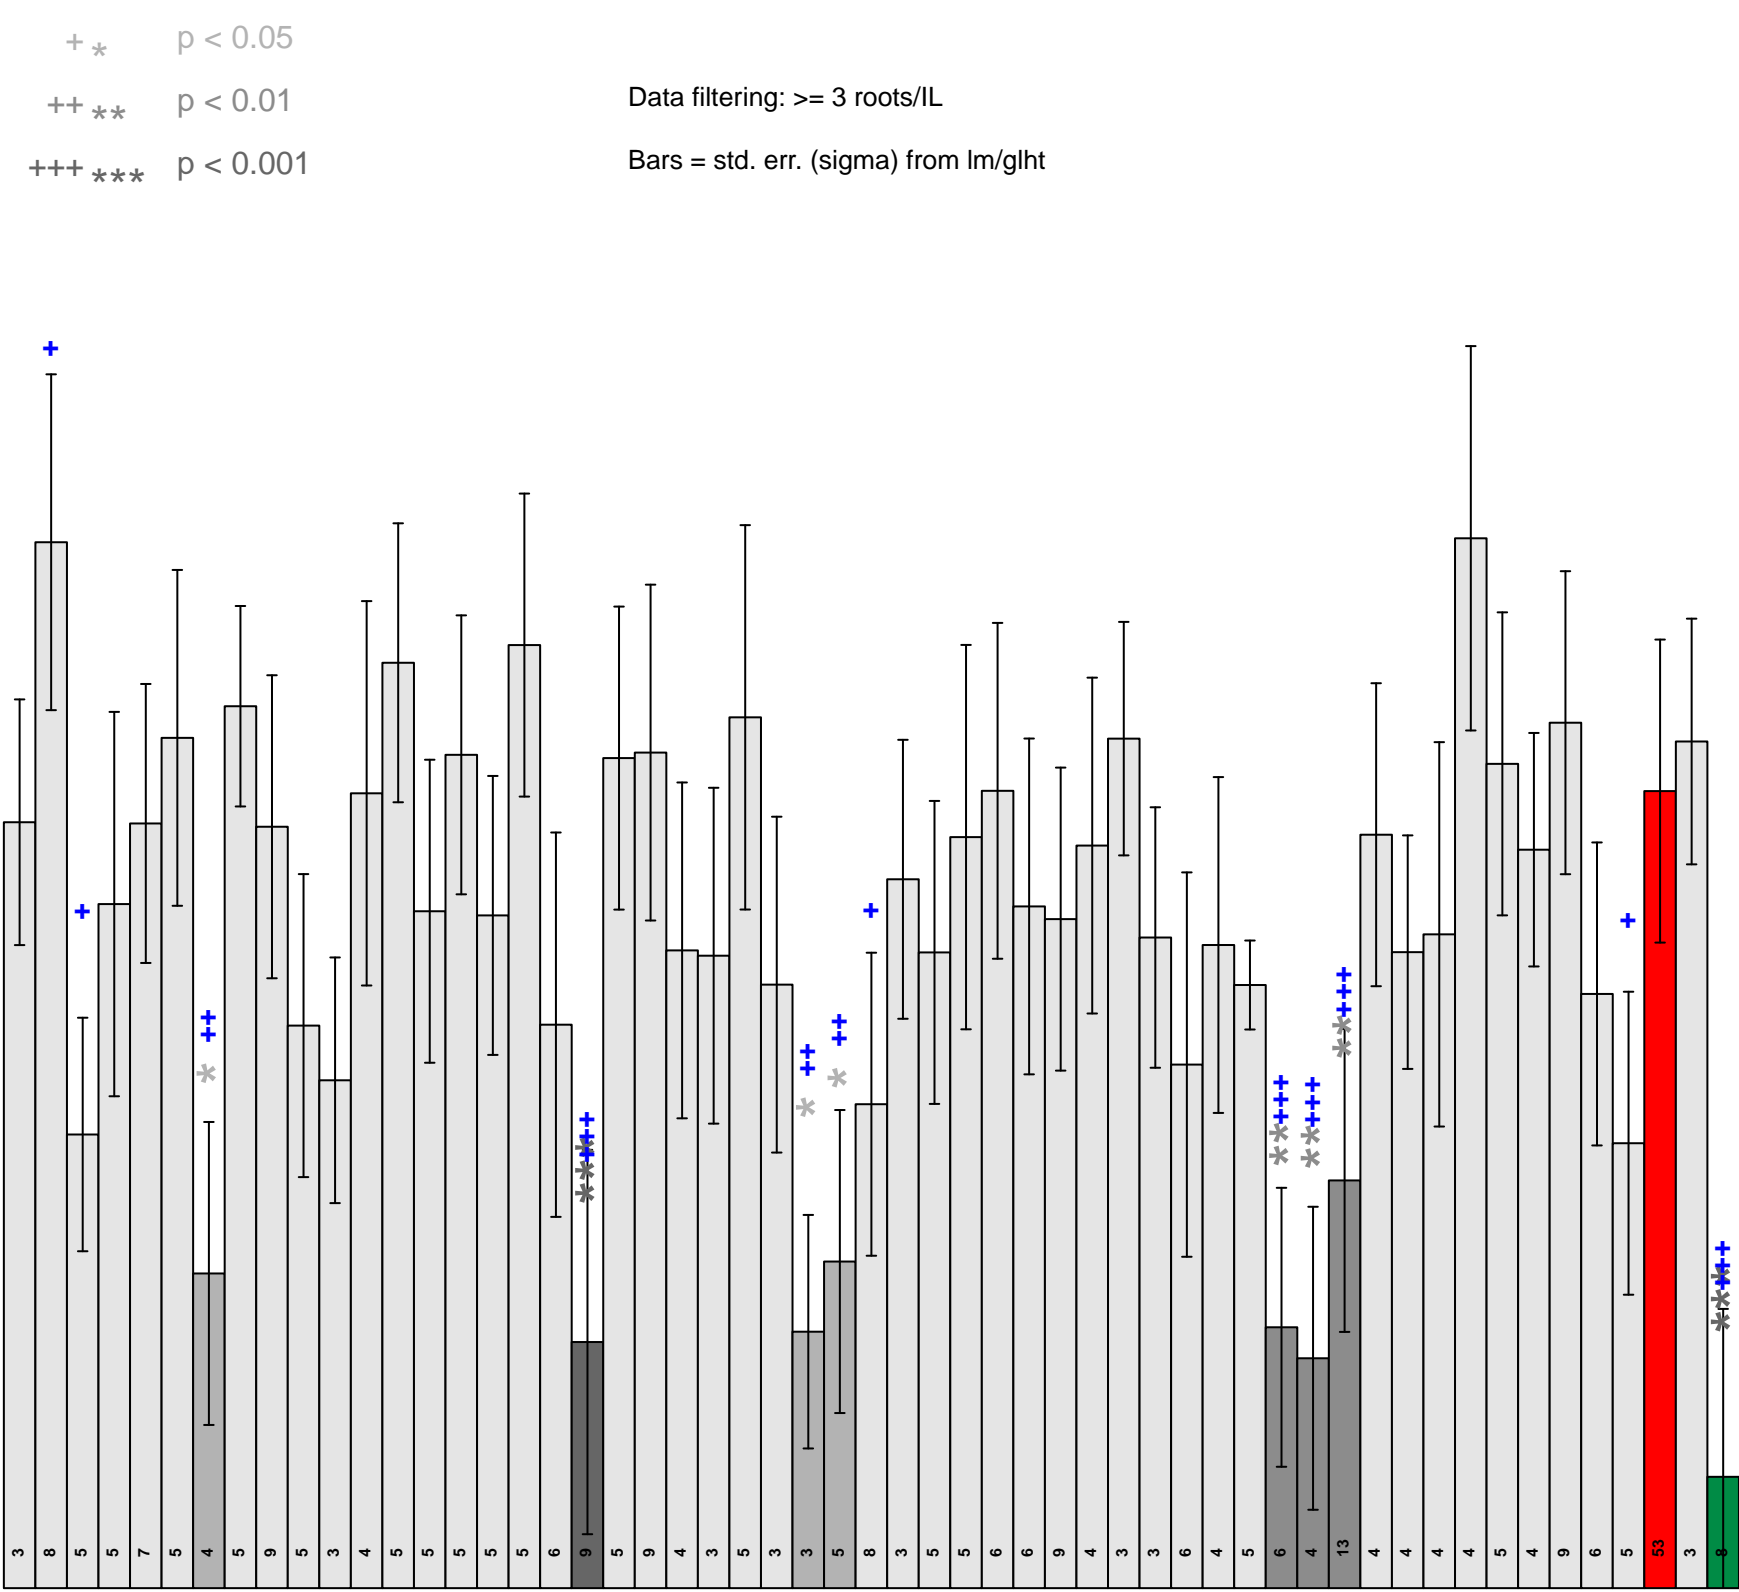

Angle Away T22

+ \*     p < 0.05  
++ \*\*    p < 0.01  
+++ \*\*\*   p < 0.001

Data filtering: >= 3 roots/IL

Bars = std. err. (sigma) from lm/glht

degrees

50  
40  
30  
20  
10  
0

IL10-1  
IL10-2  
IL10-2-2  
IL10-3  
IL11-1  
IL11-2  
IL11-4  
IL11-4-1  
IL12-1  
IL12-1-1  
IL12-2  
IL12-3  
IL12-3-1  
IL12-4  
IL12-4-1  
IL1-1-2  
IL1-3  
IL1-4  
IL1-4-18  
IL2-1  
IL2-1-1  
IL2-2  
IL2-4  
IL2-6-5  
IL3-5  
IL4-1  
IL4-1-1  
IL4-3  
IL4-3-2  
IL4-4  
IL5-1  
IL5-2  
IL5-5  
IL6-1  
IL6-2  
IL6-4  
IL7-1  
IL7-3  
IL7-4  
IL7-4-1  
IL7-5  
IL7-5-1  
IL7-5-5  
IL8-1  
IL8-1-1  
IL8-1-5  
IL8-3  
IL9-1  
IL9-1-2  
IL9-2  
IL9-2-6  
IL9-3-1  
M82  
IL7-5-P5  
PENN

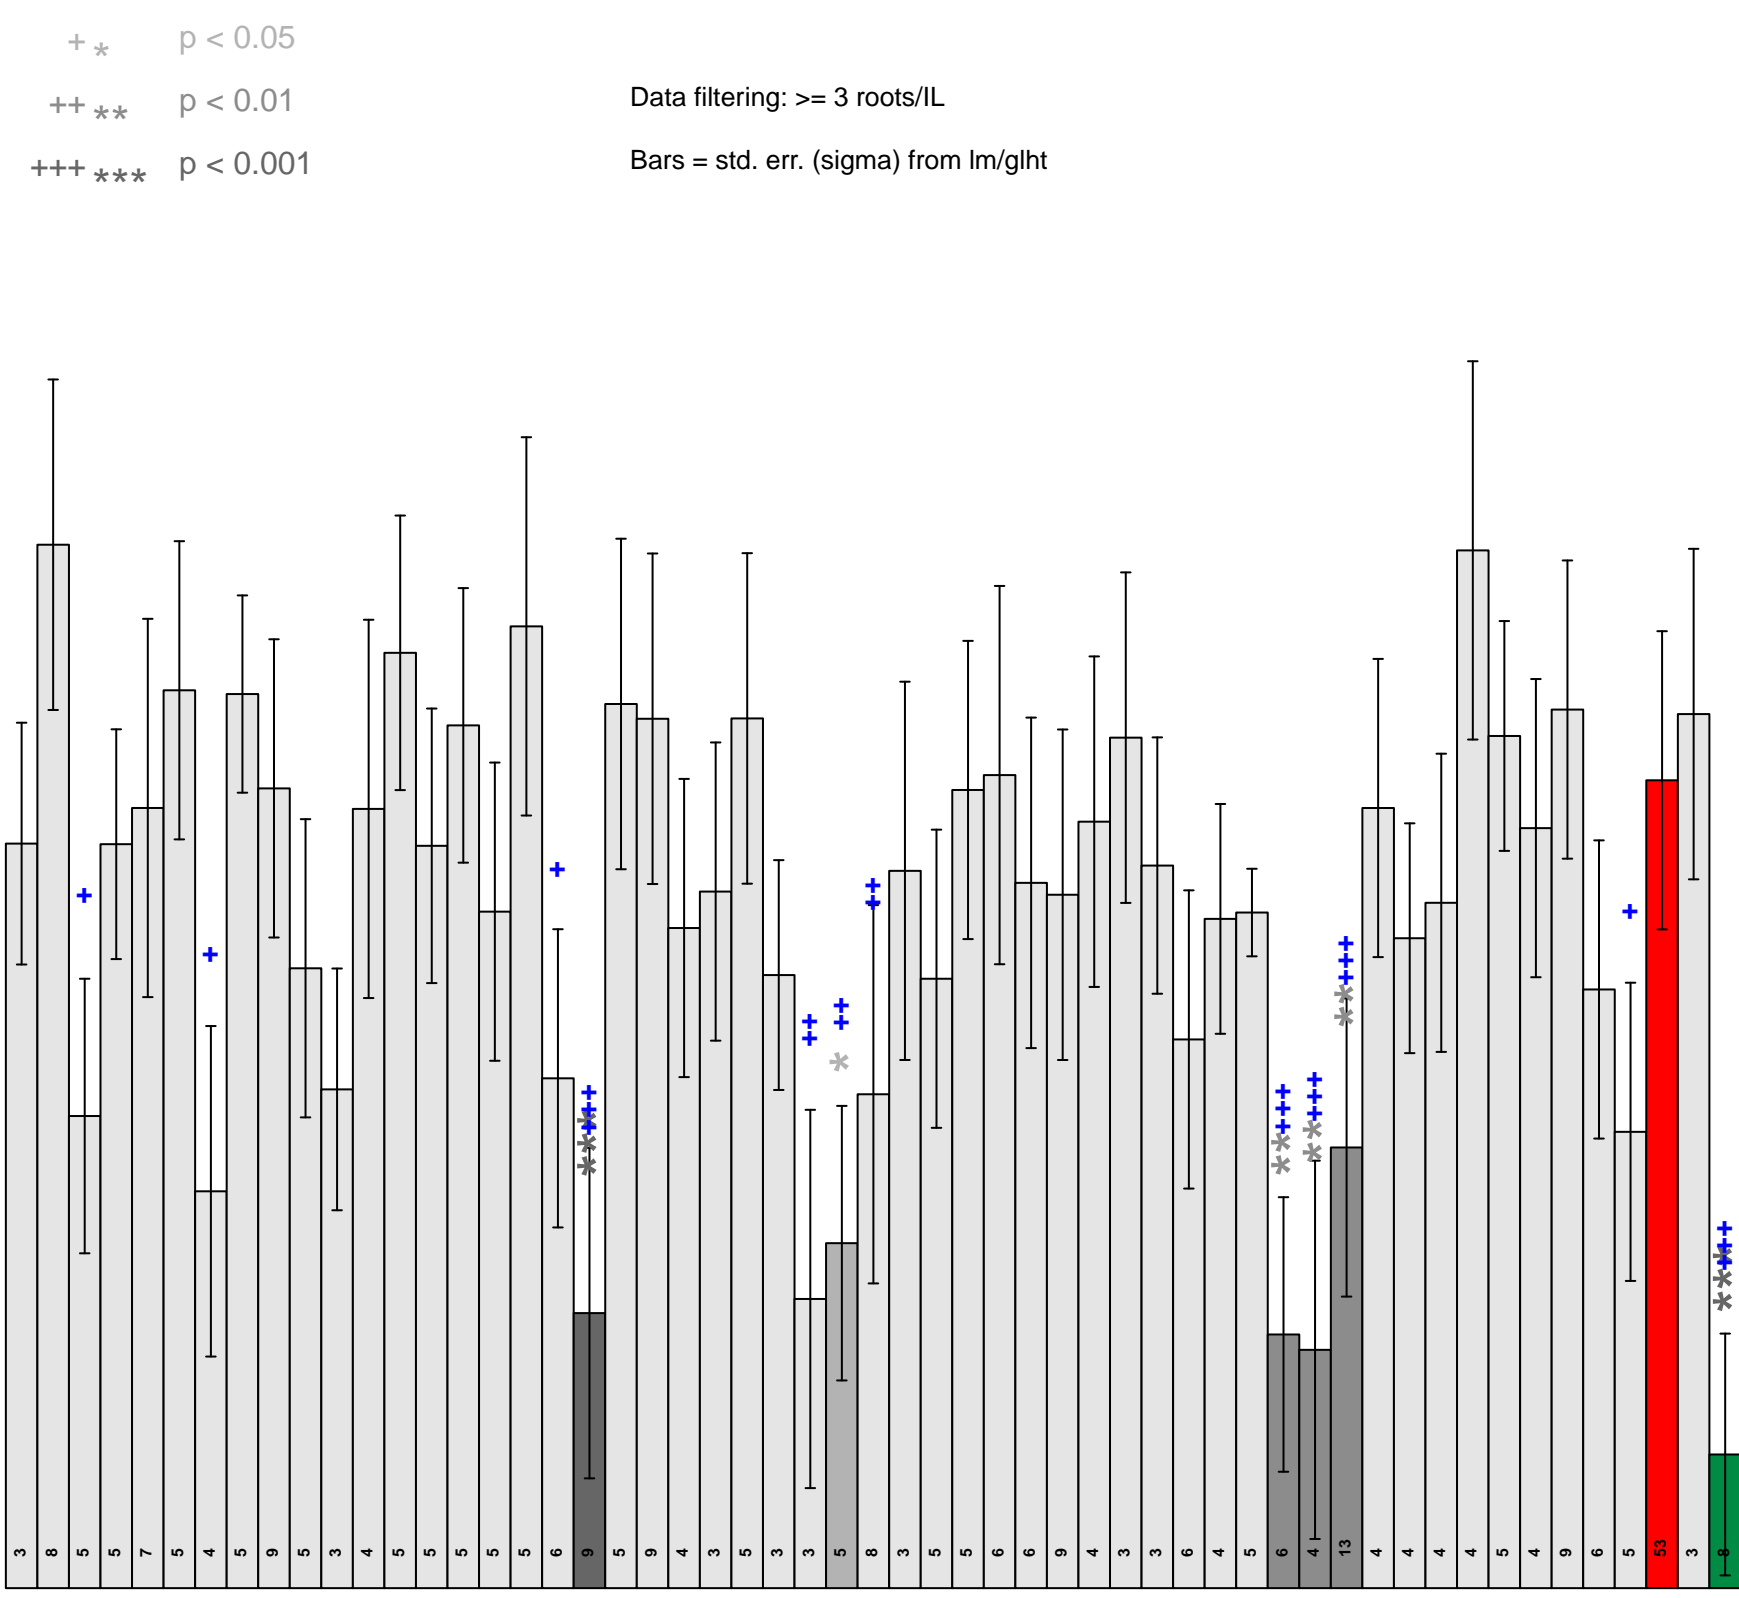

Angle Away T23

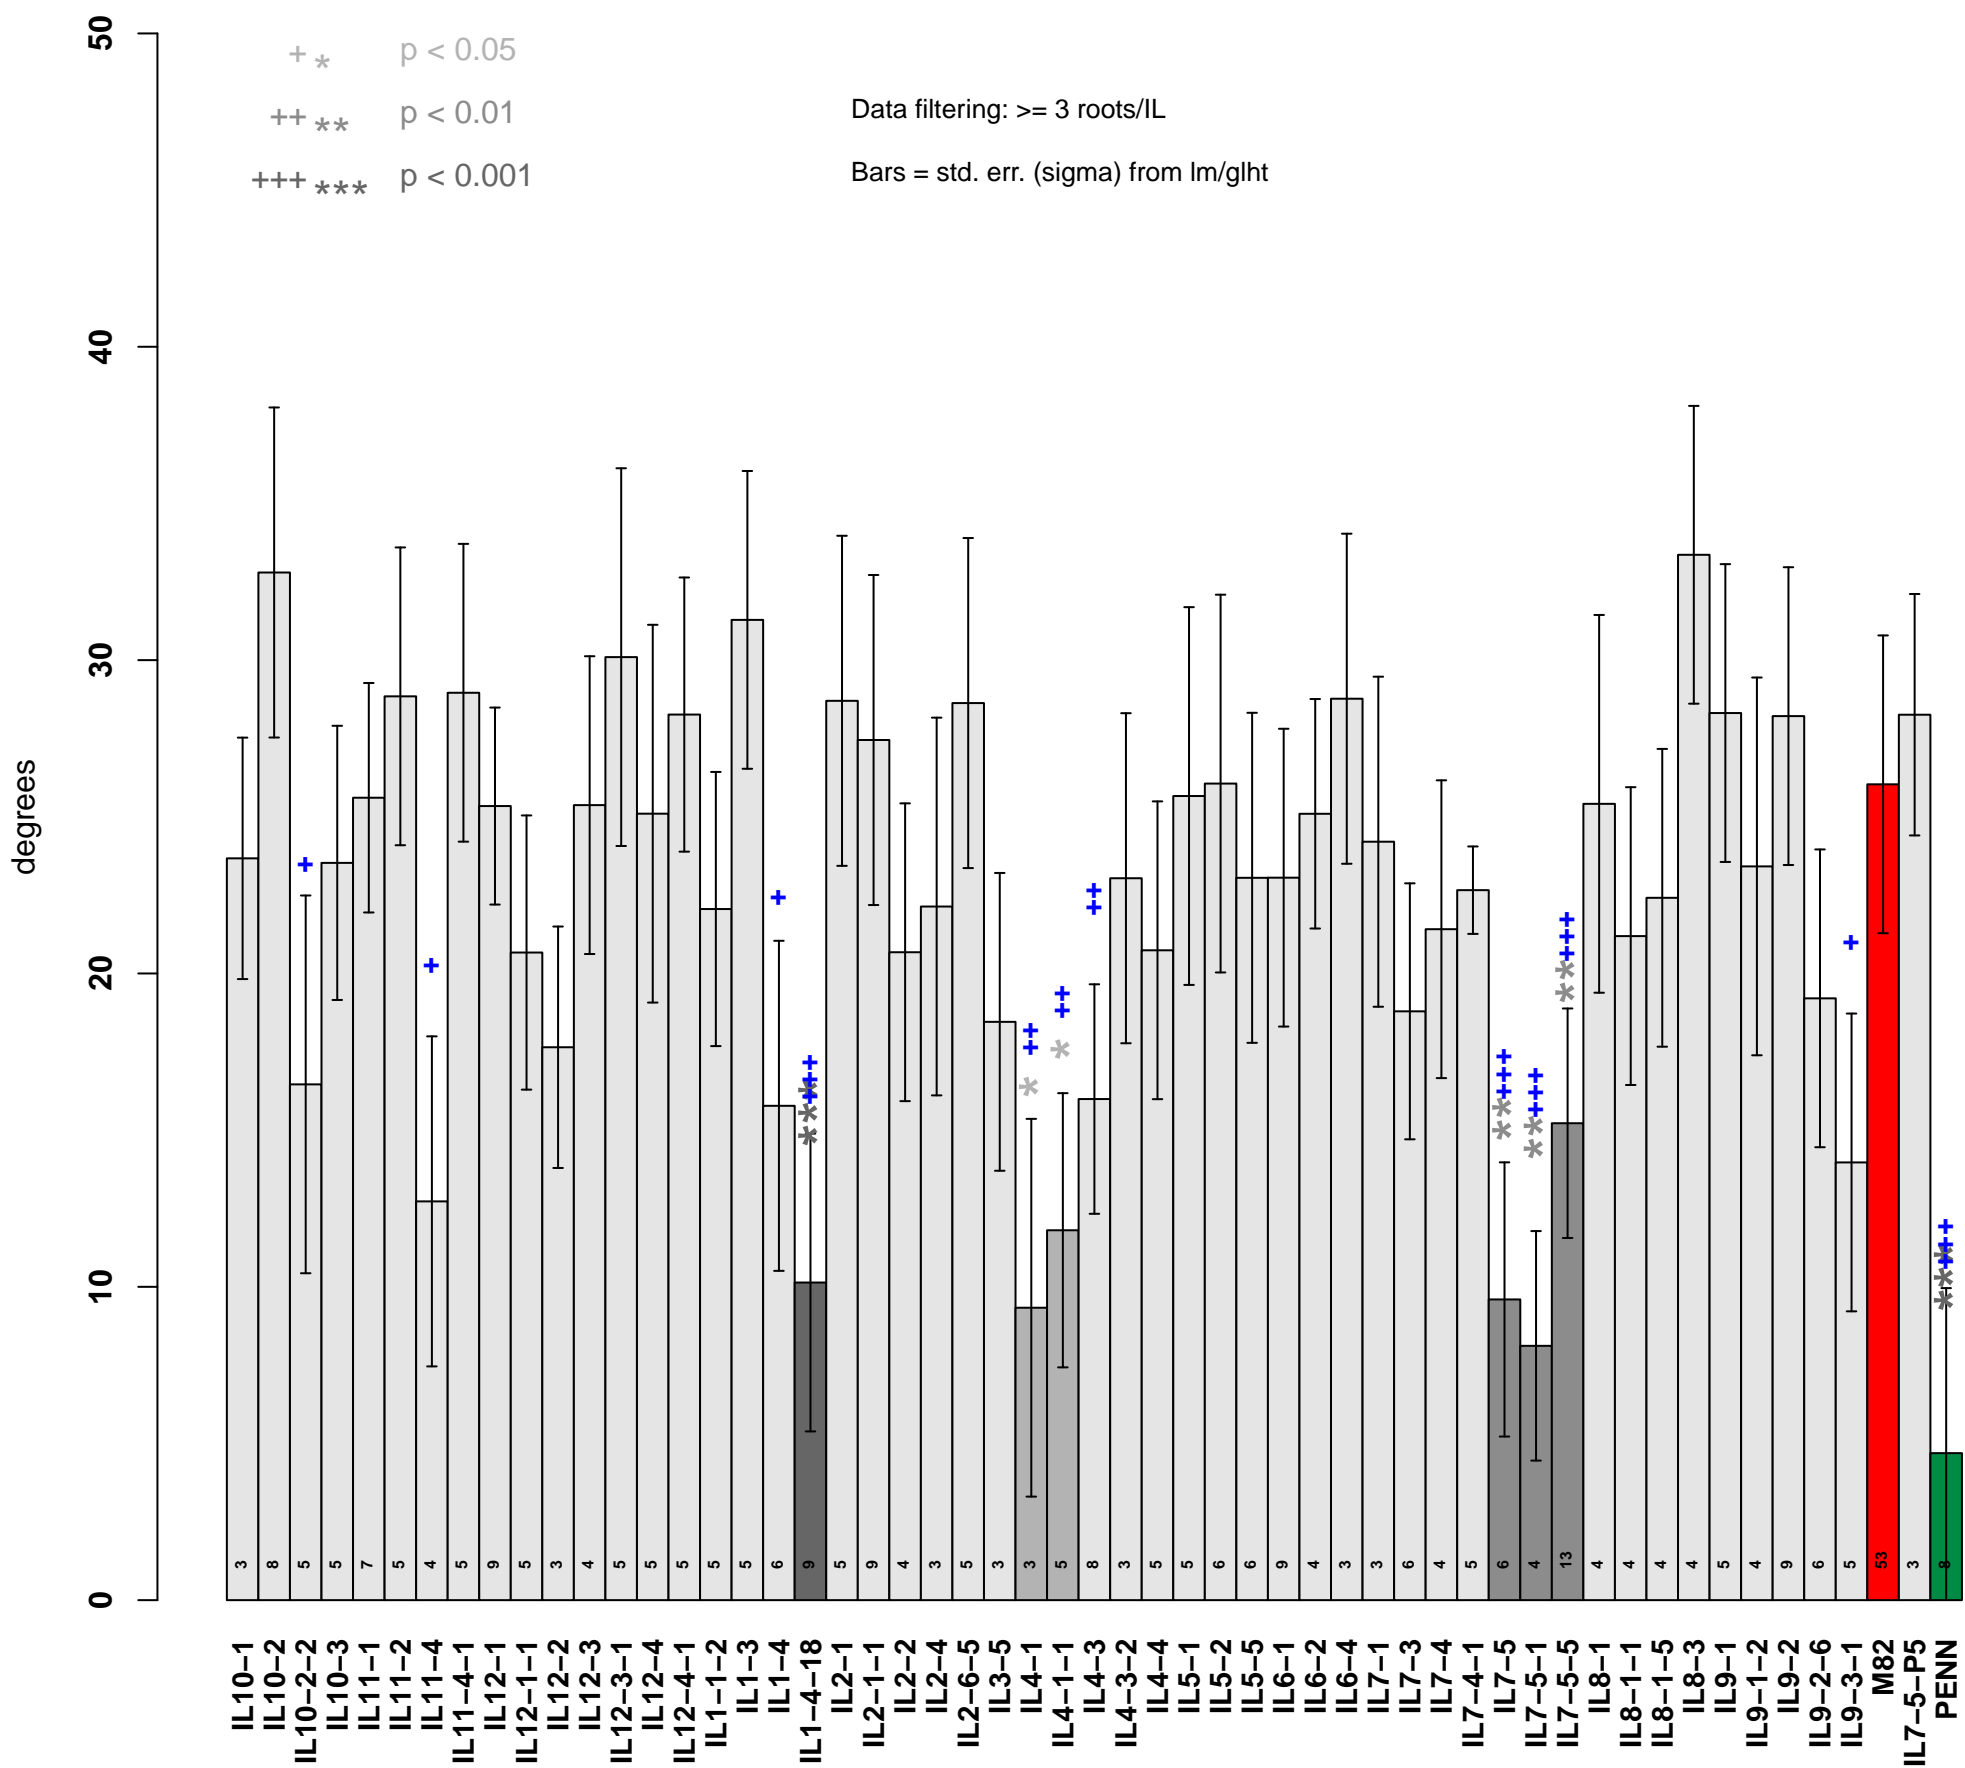



Angle Away T24

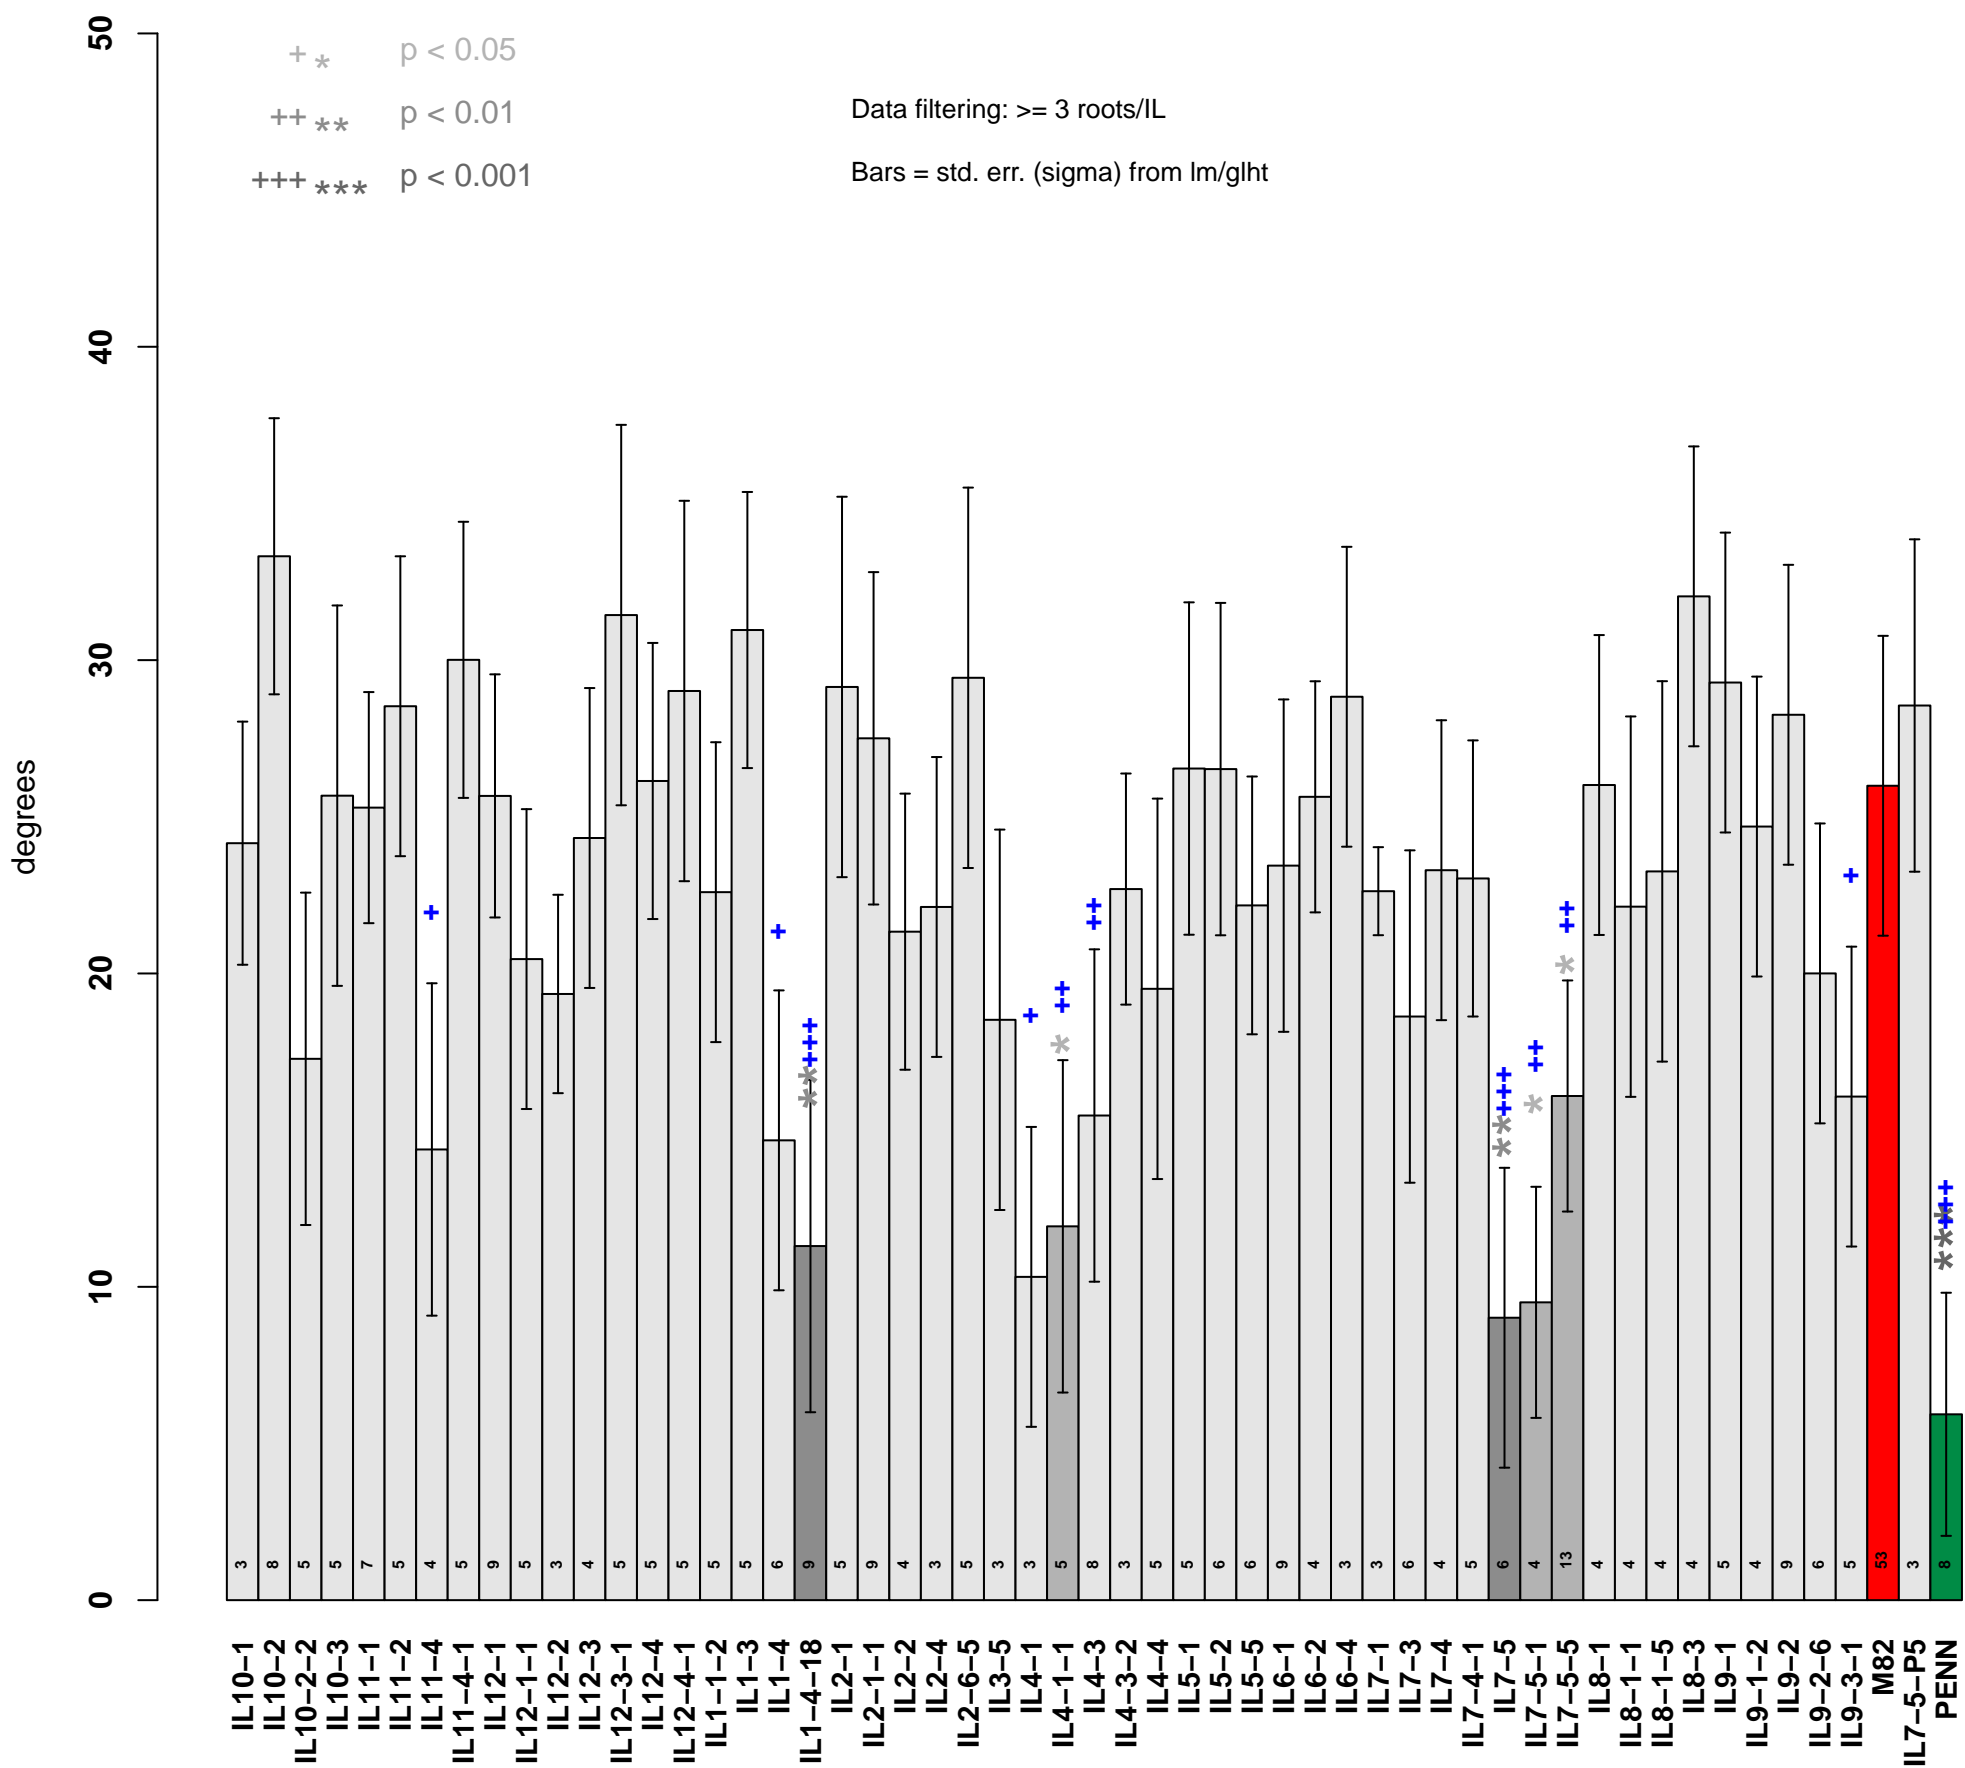

Angle Away T25

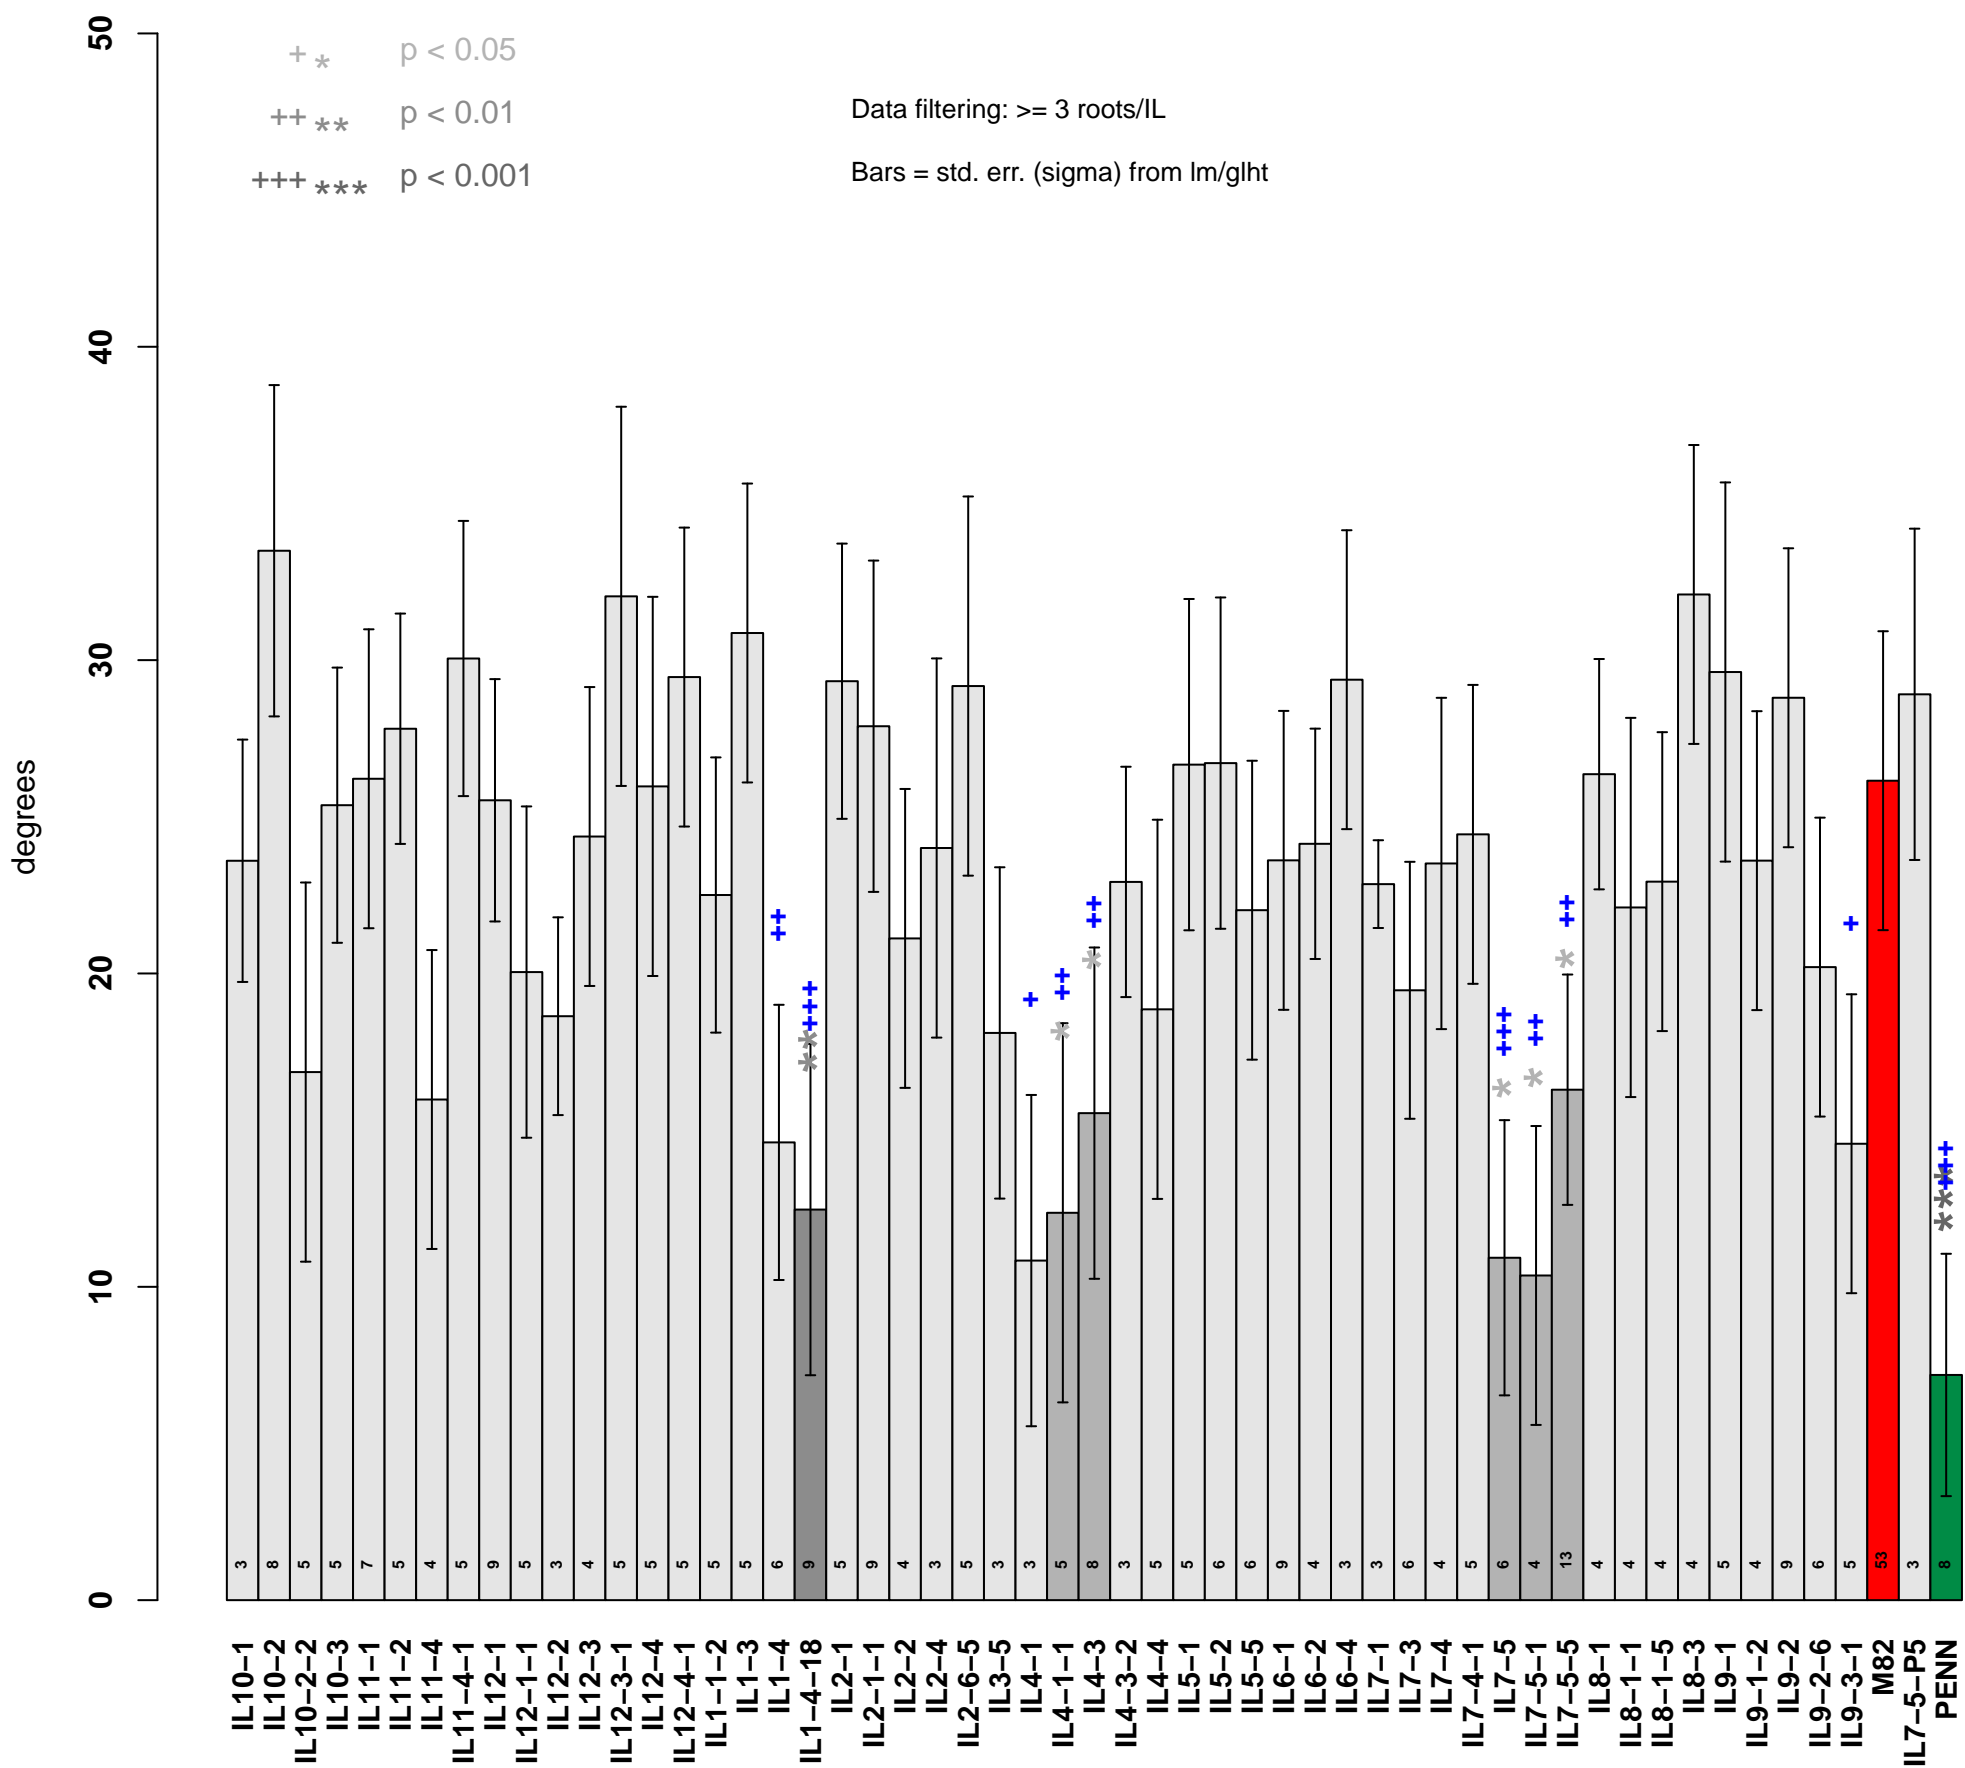

Angle Away T26

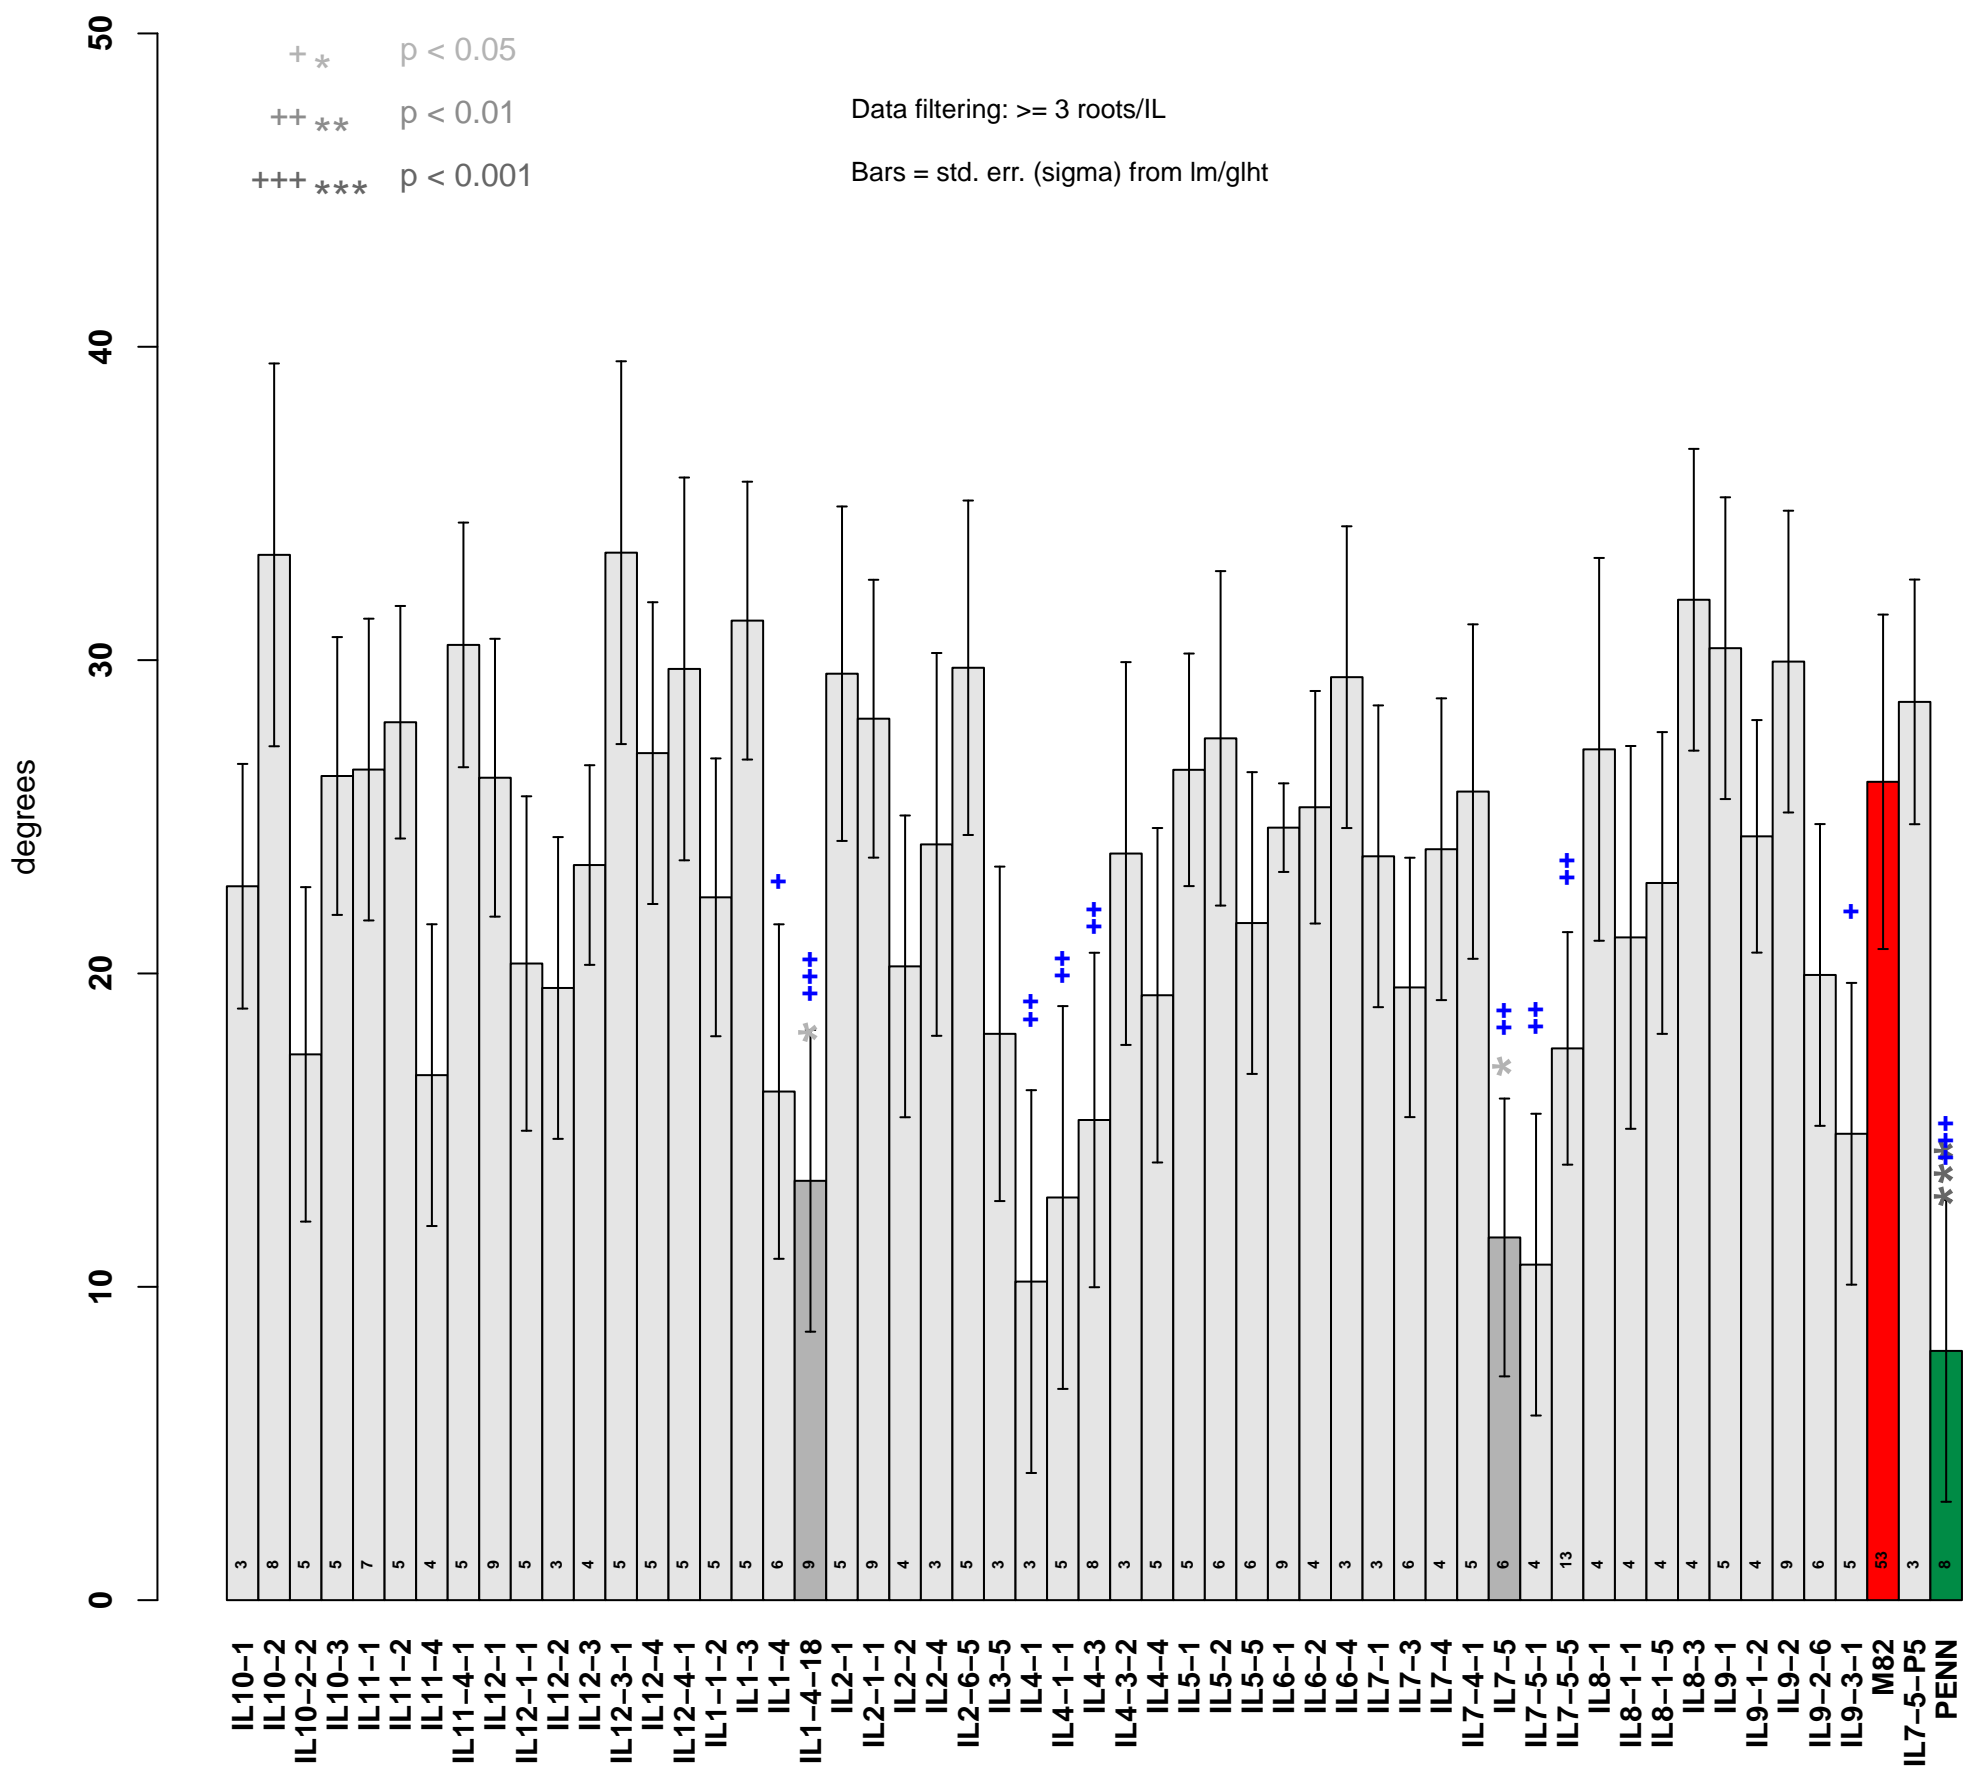

Angle Away T27

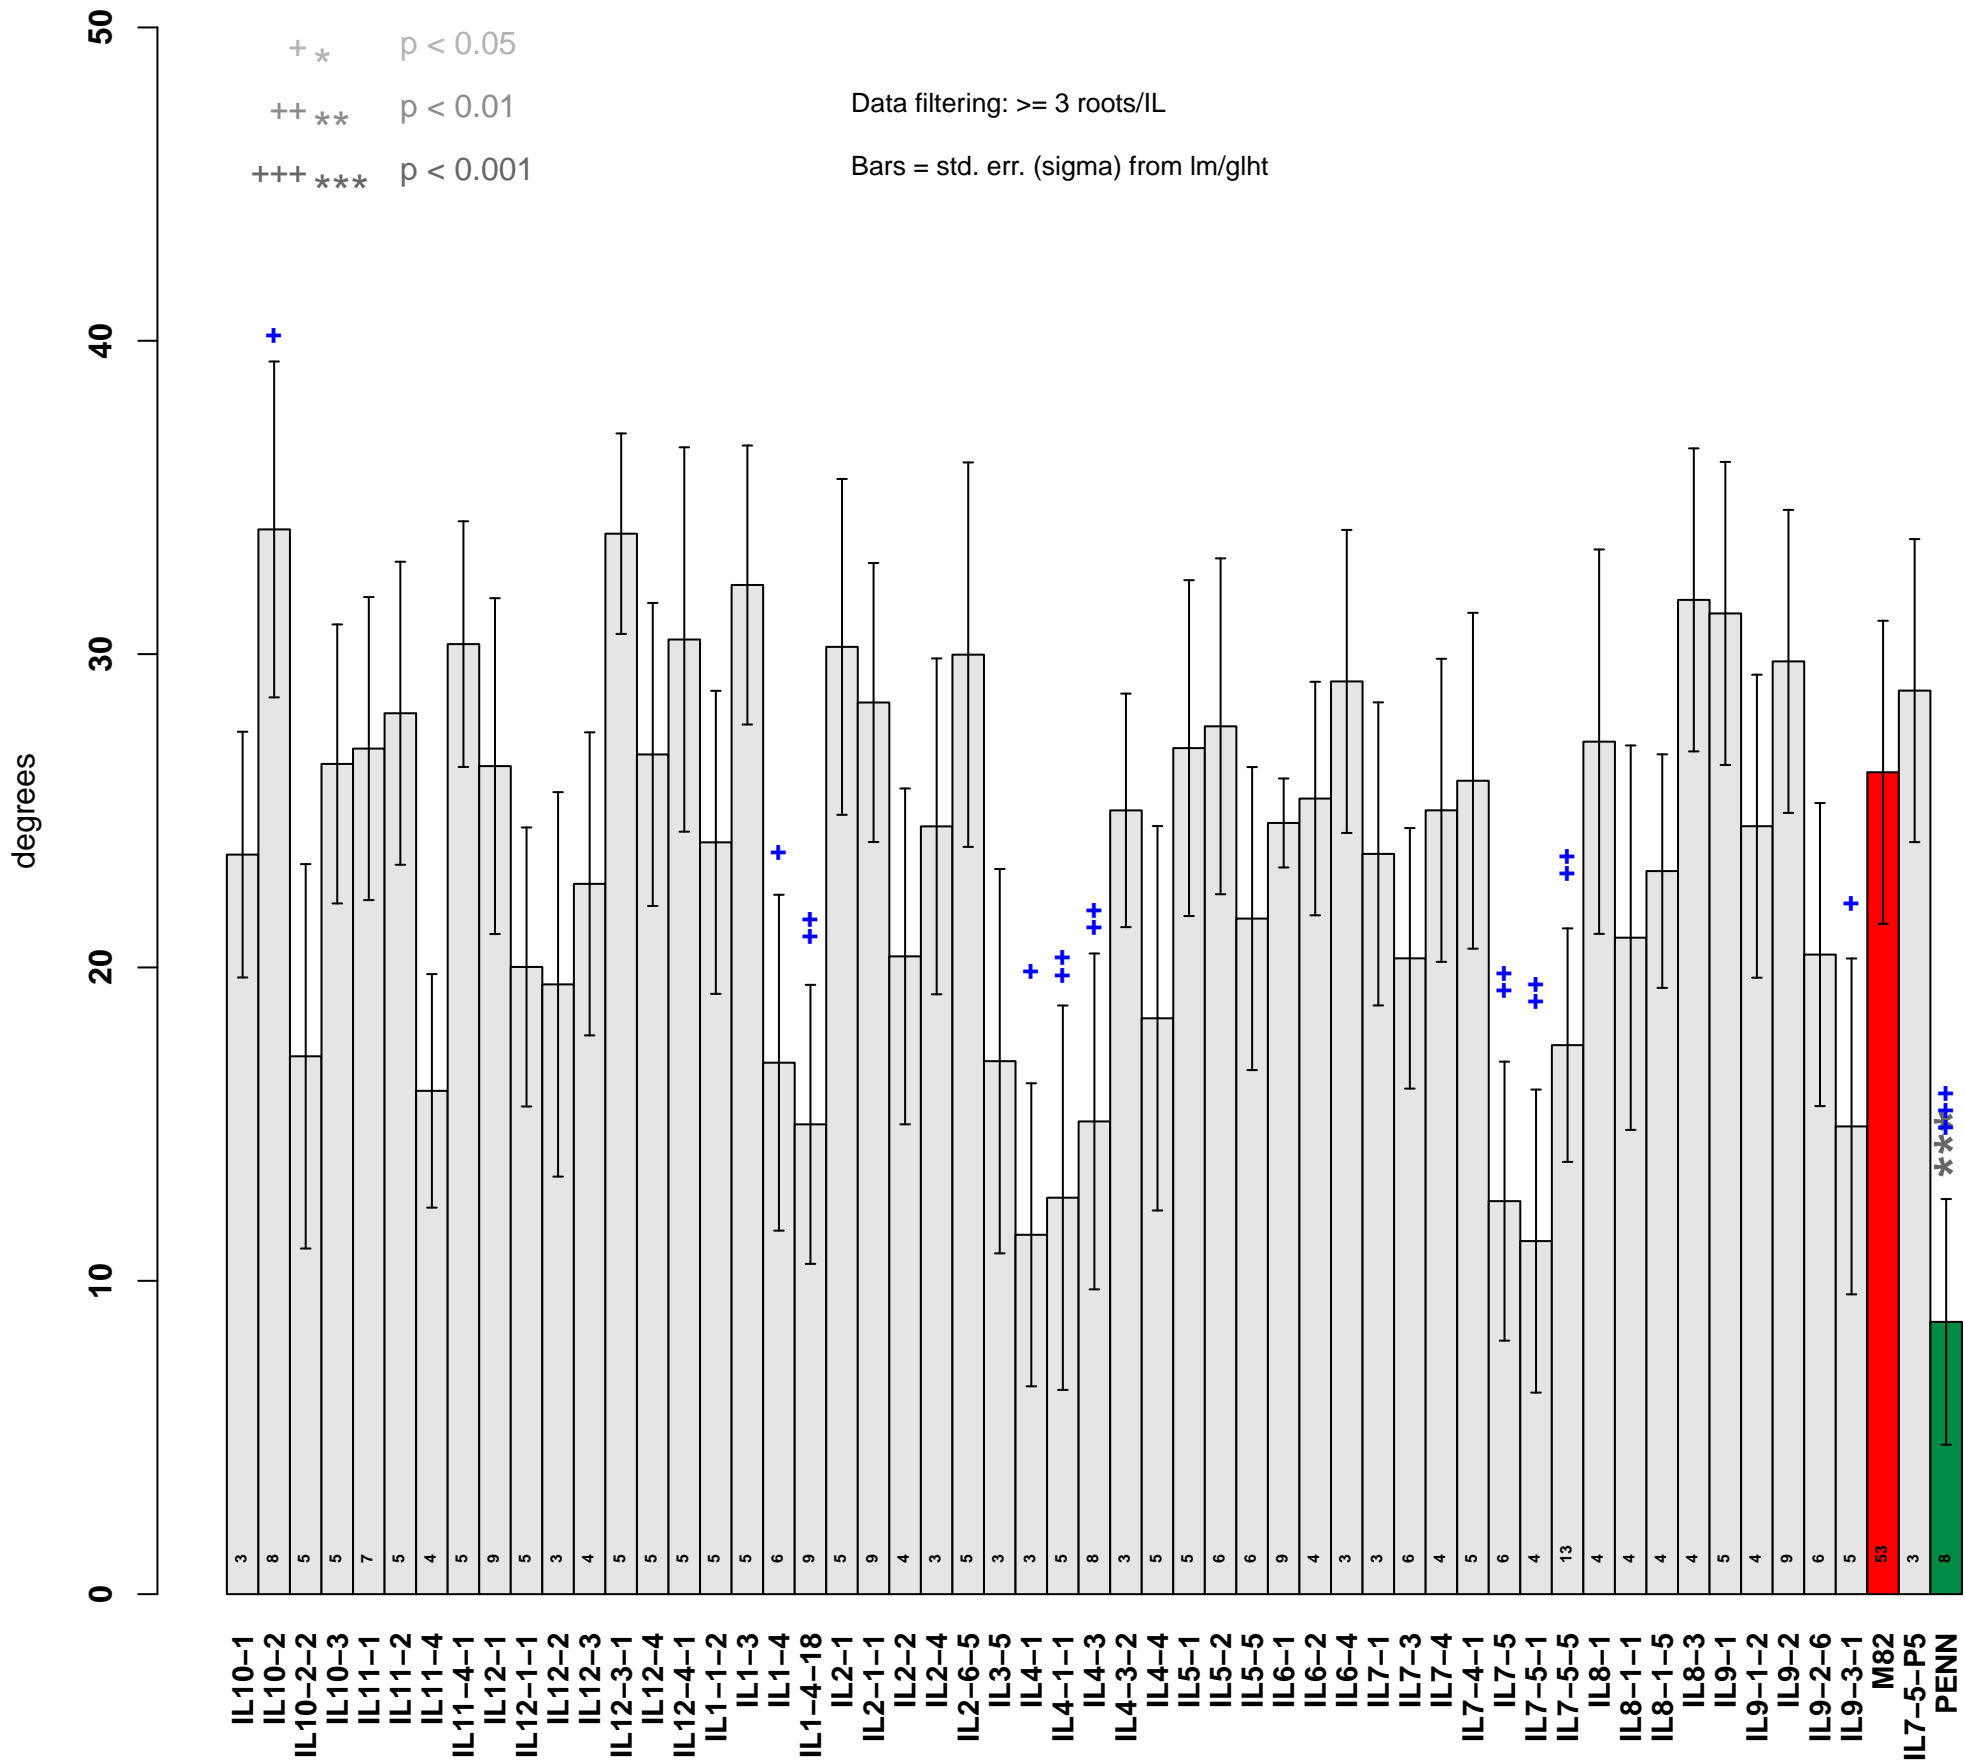

Angle Away T28

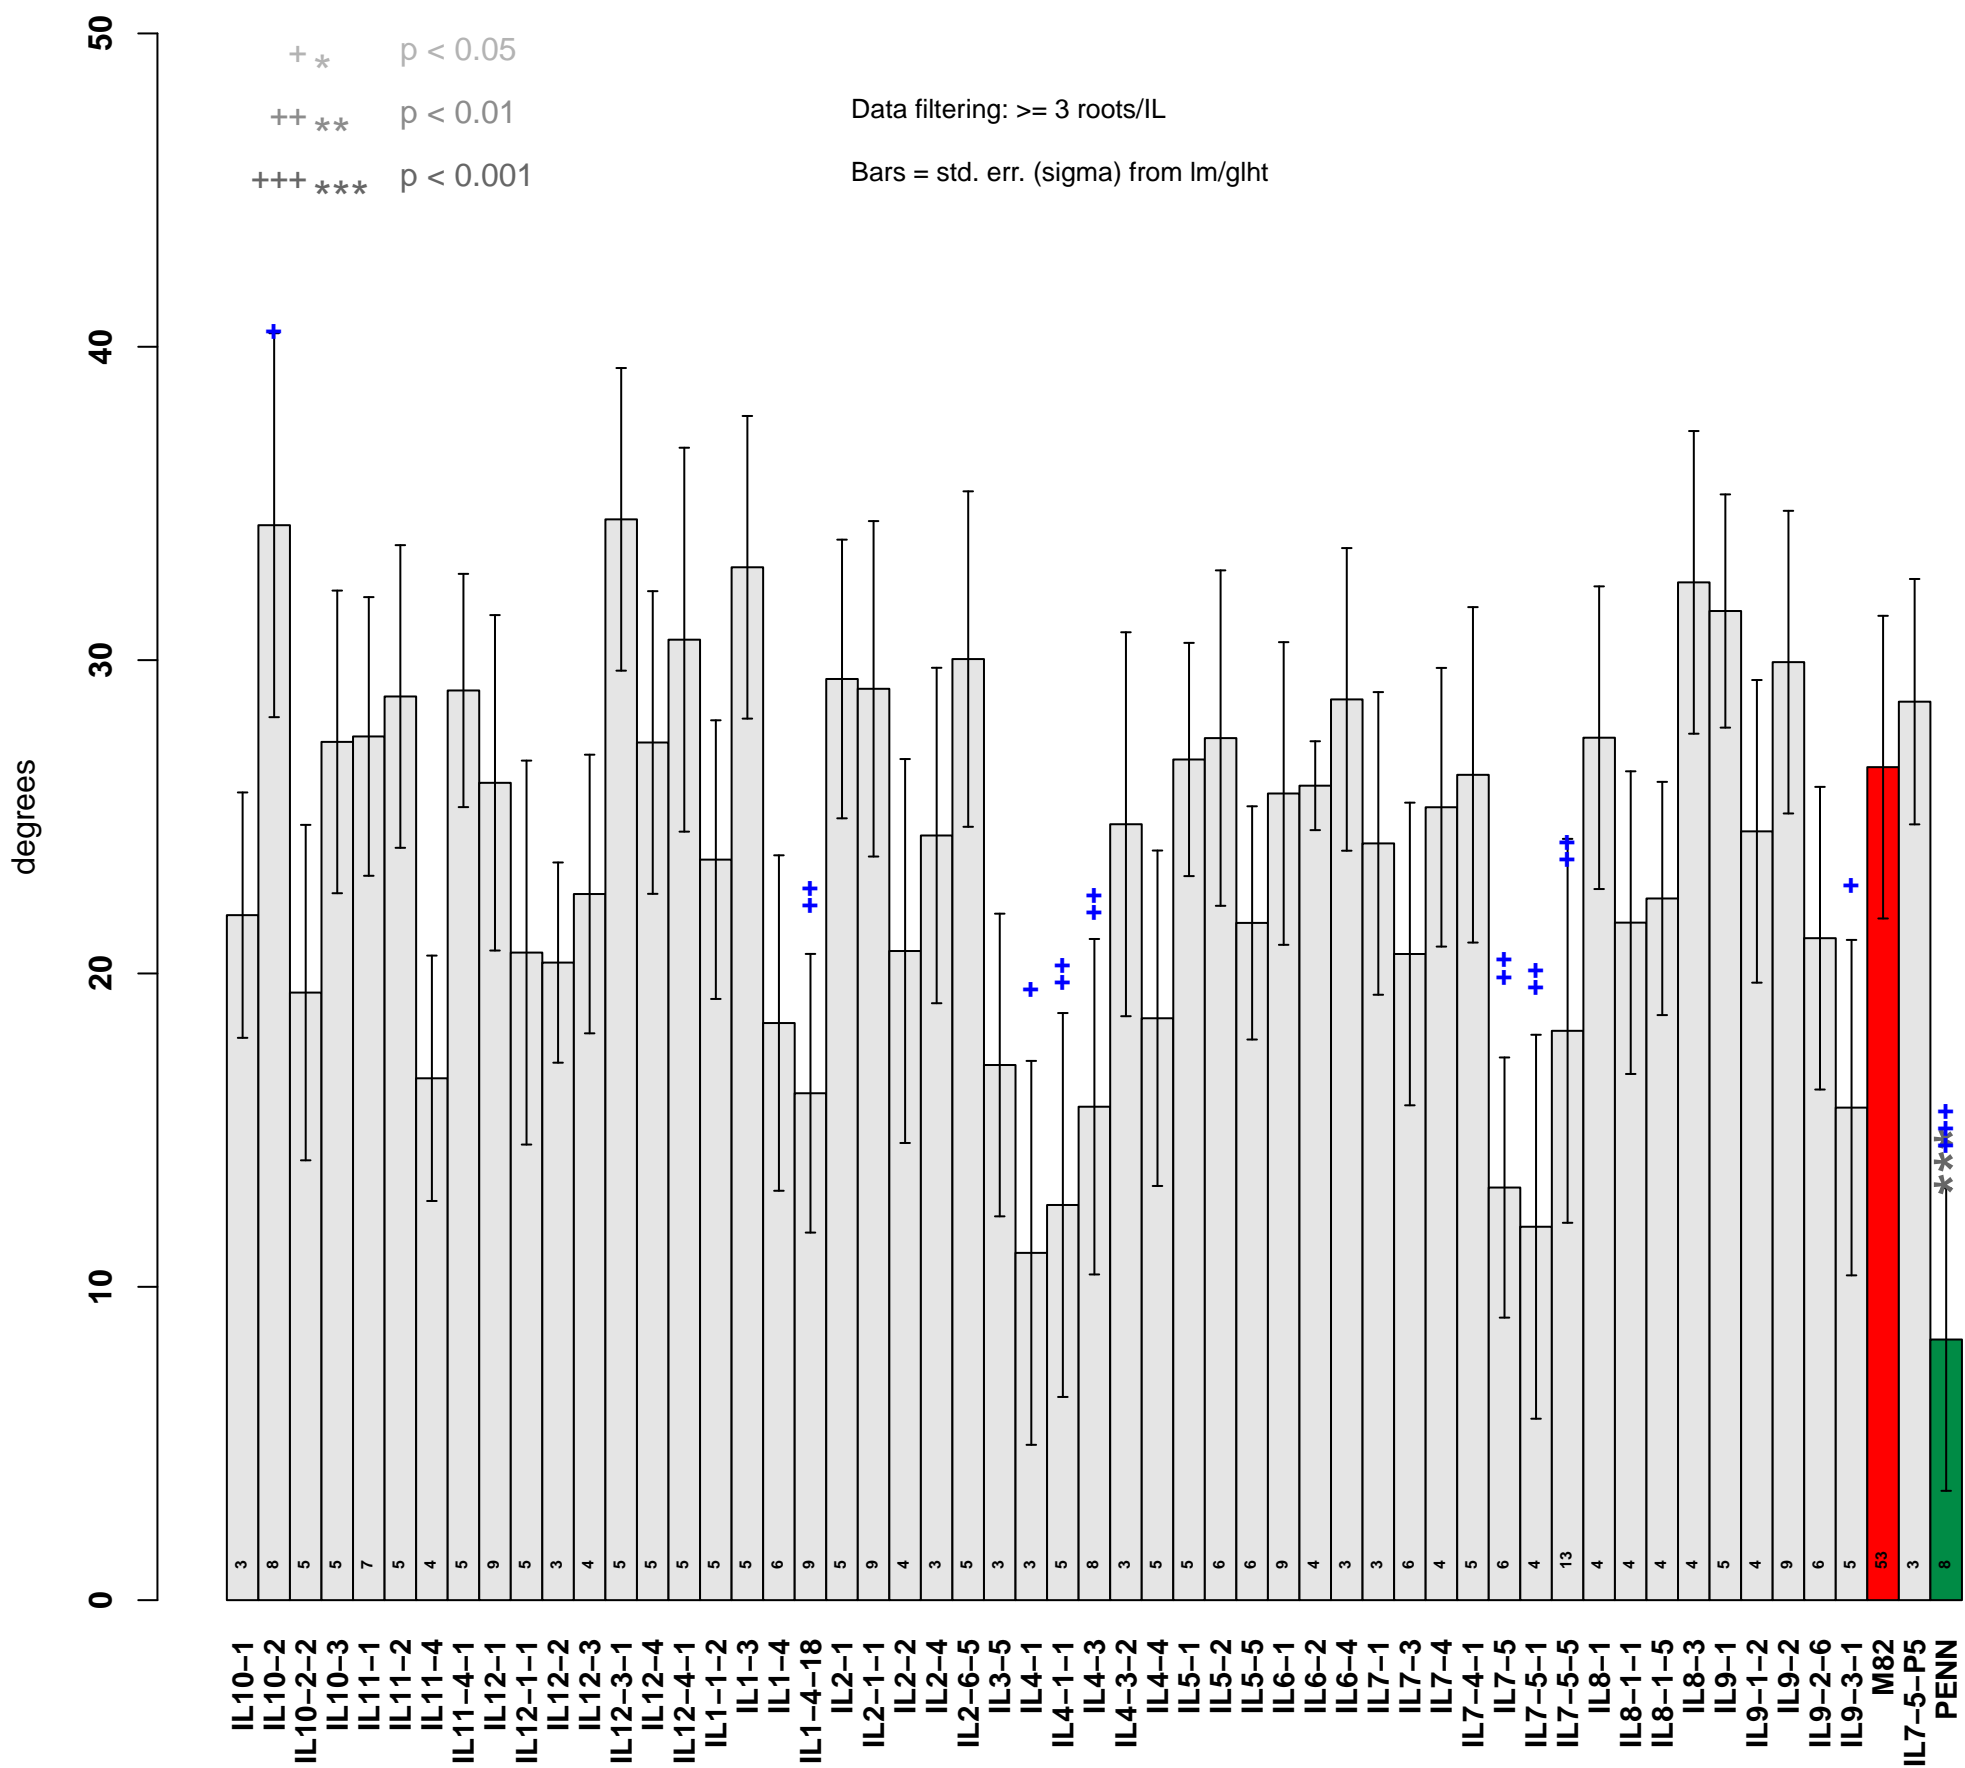

## Angle Away T29

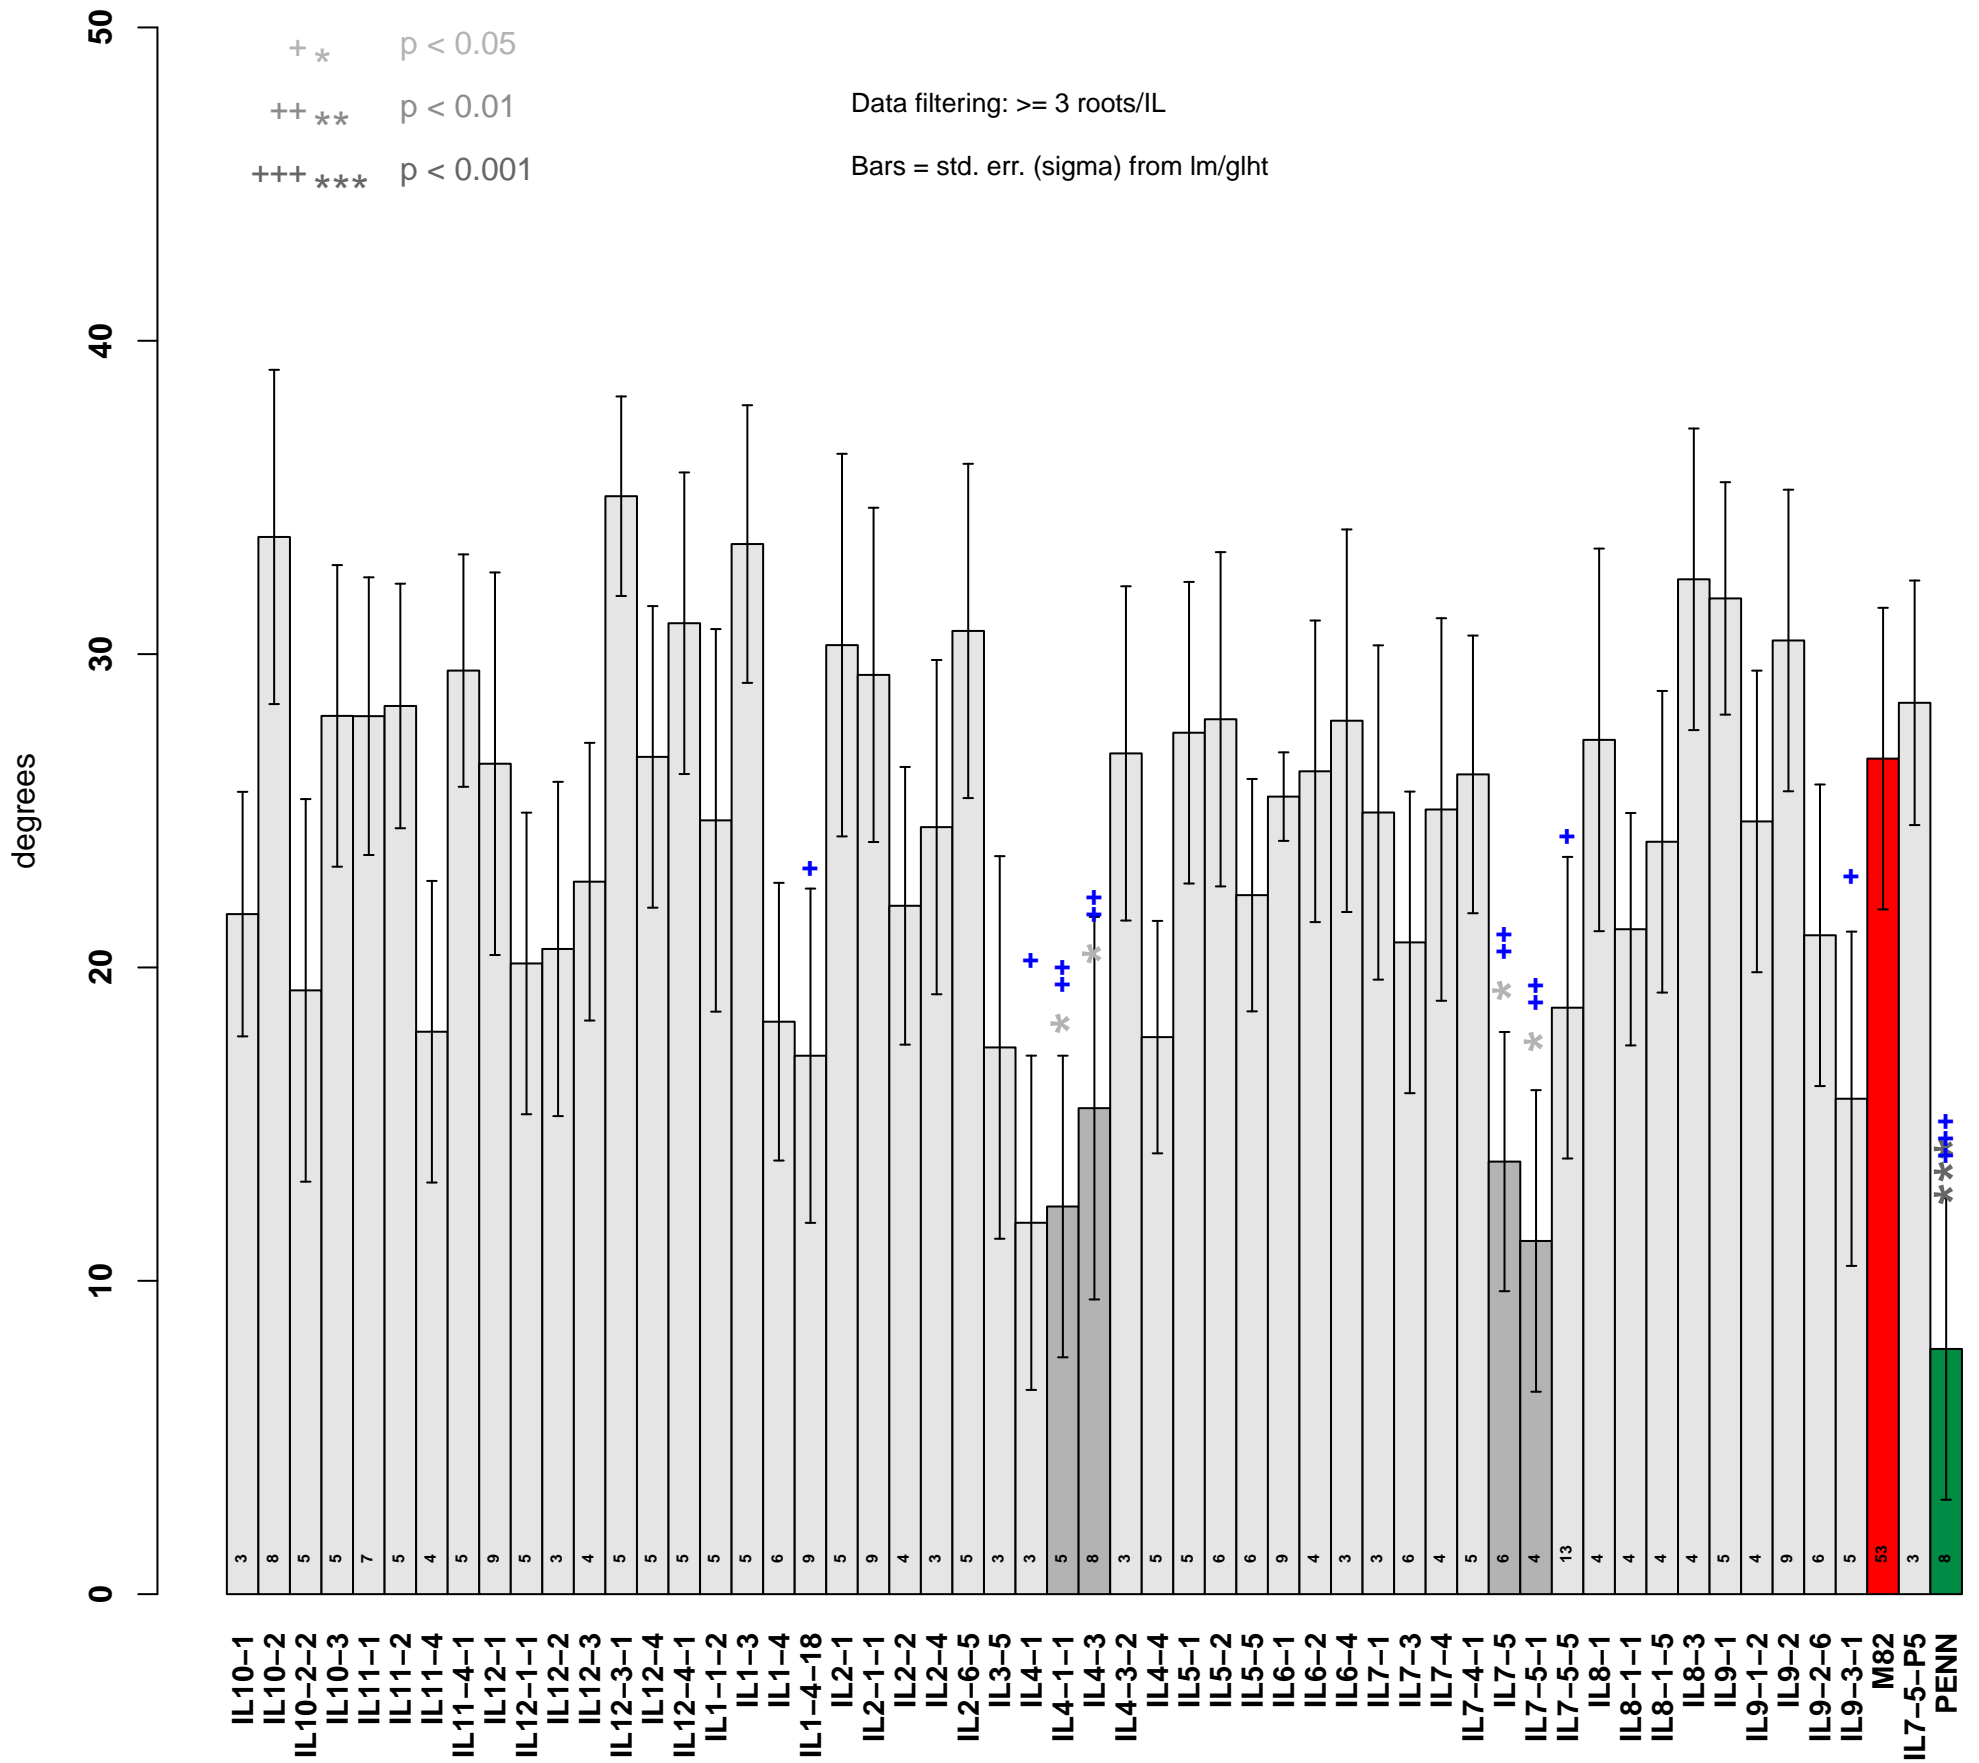

Angle Away T30

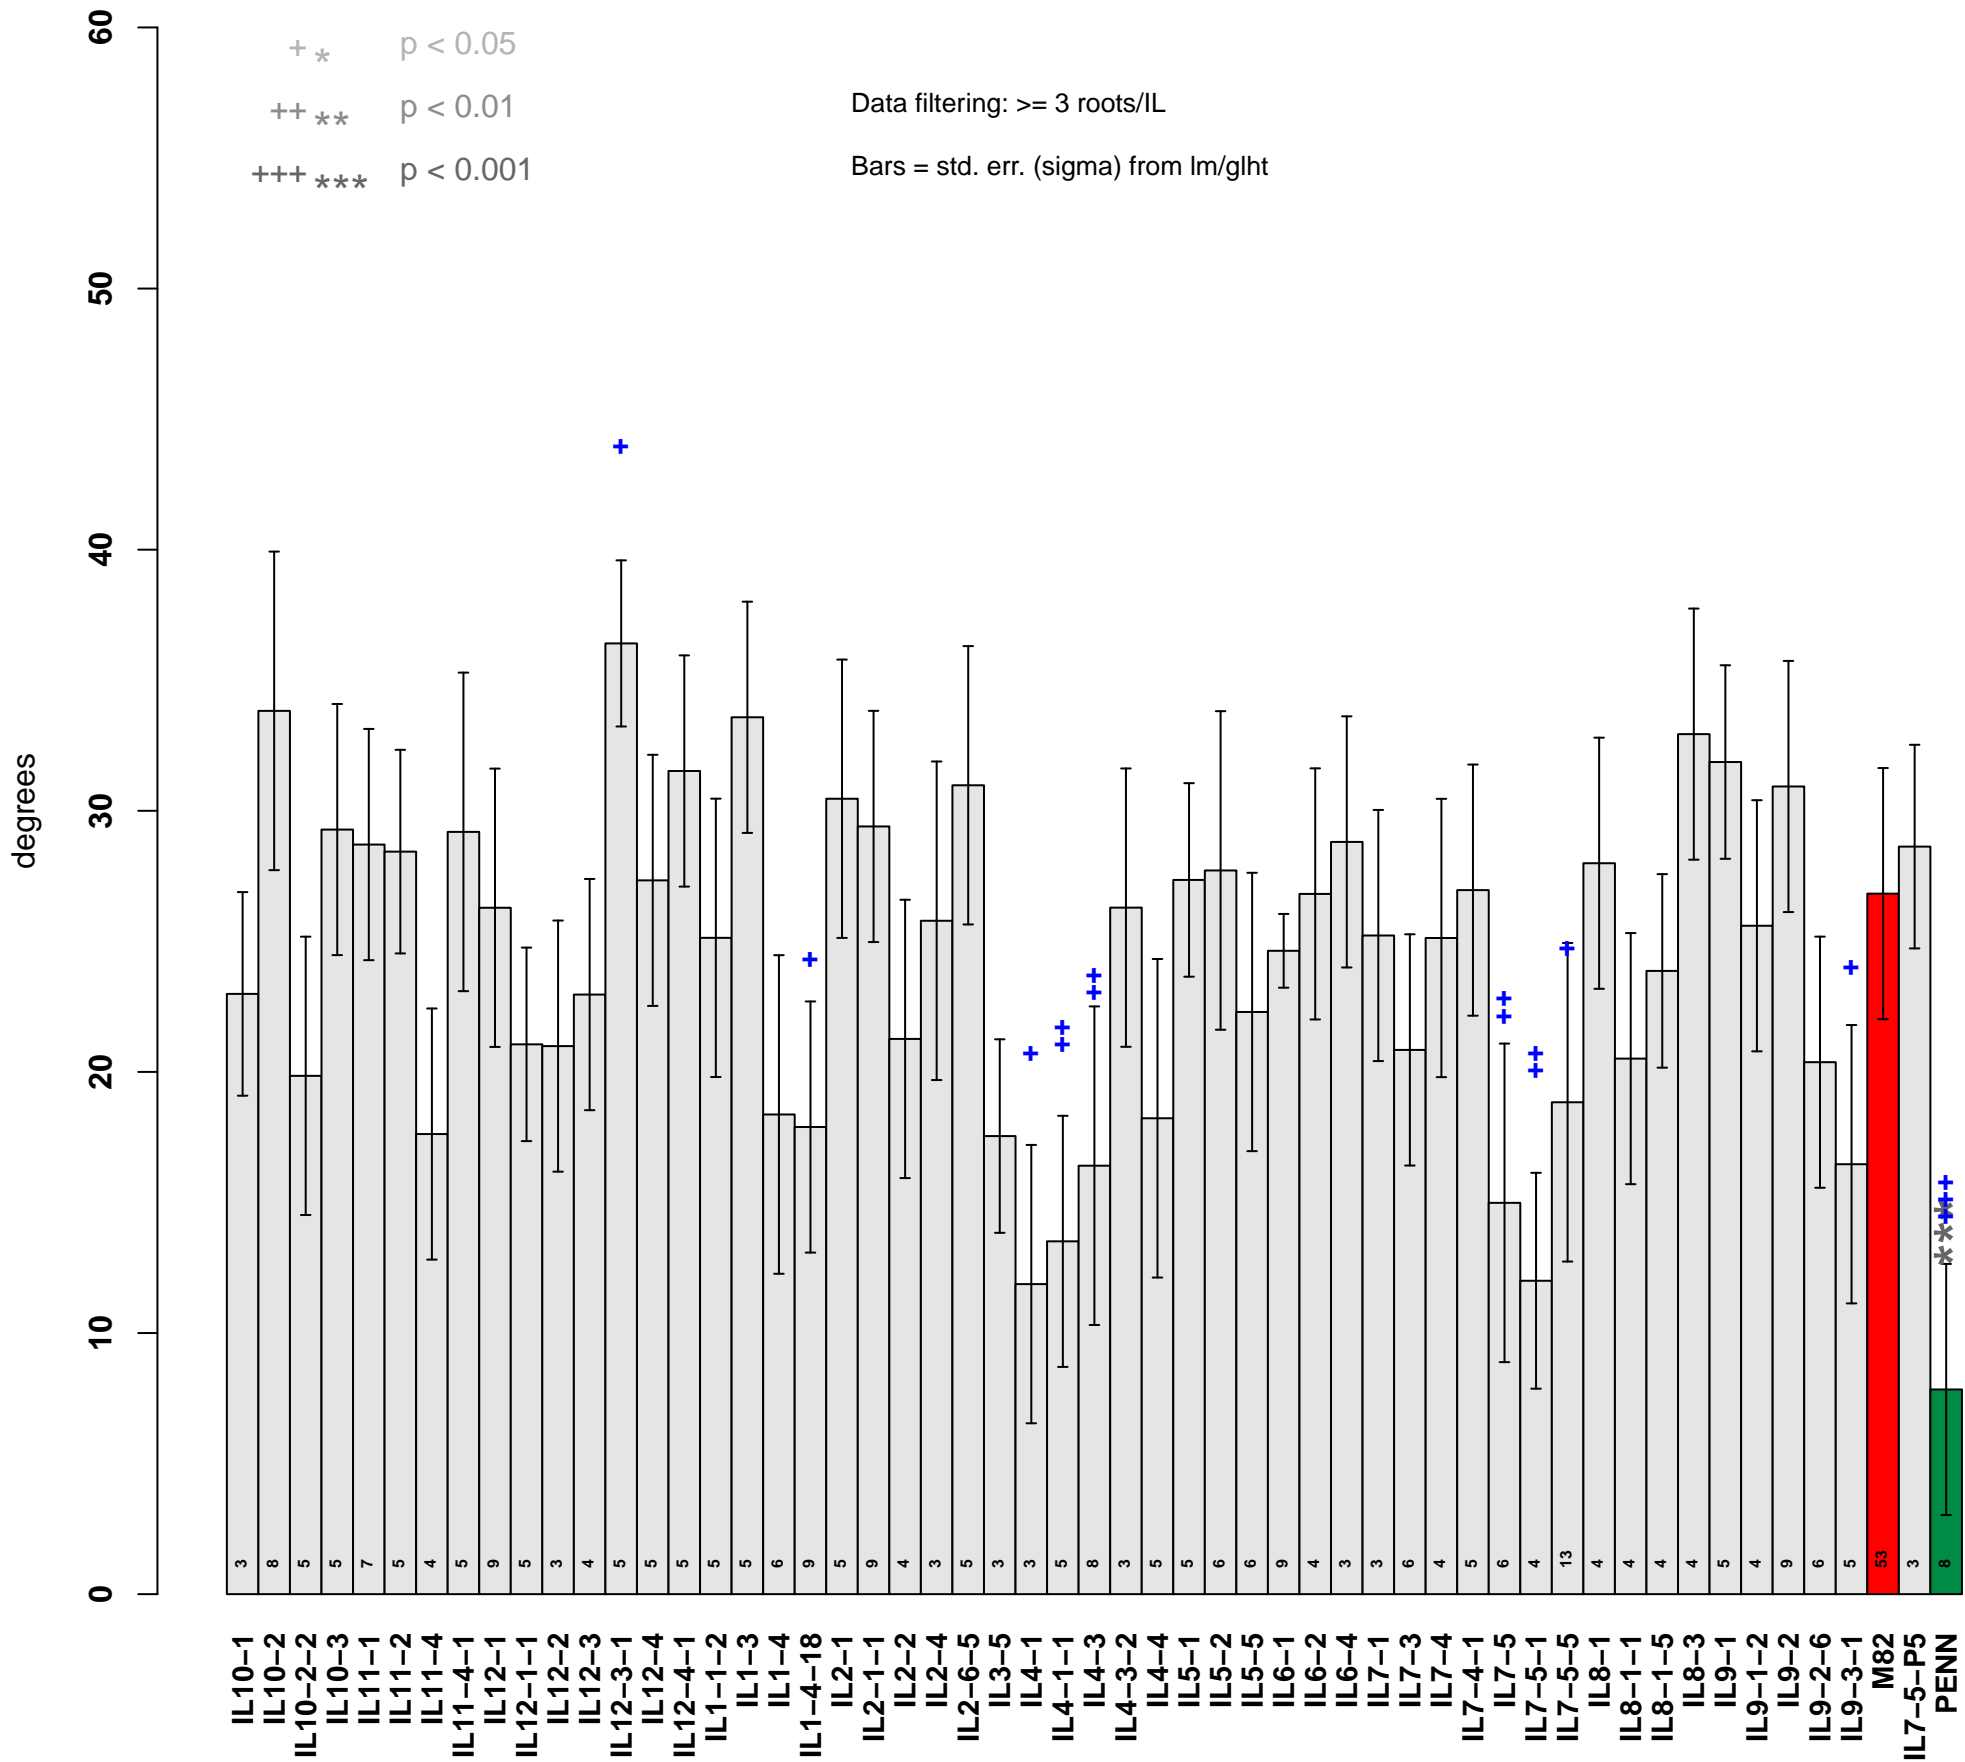

Angle Away T31

+ \*     p < 0.05  
++ \*\*    p < 0.01  
+++ \*\*\*   p < 0.001

Data filtering: >= 3 roots/IL

Bars = std. err. (sigma) from lm/glht

degrees

60  
50  
40  
30  
20  
10  
0

IL10-1  
IL10-2  
IL10-2-2  
IL10-3  
IL11-1  
IL11-2  
IL11-4  
IL11-4-1  
IL12-1  
IL12-1-1  
IL12-2  
IL12-3  
IL12-3-1  
IL12-4  
IL12-4-1  
IL1-1-2  
IL1-3  
IL1-4  
IL1-4-18  
IL2-1  
IL2-1-1  
IL2-2  
IL2-4  
IL2-6-5  
IL3-5  
IL4-1  
IL4-1-1  
IL4-3  
IL4-3-2  
IL4-4  
IL5-1  
IL5-2  
IL5-5  
IL6-1  
IL6-2  
IL6-4  
IL7-1  
IL7-3  
IL7-4  
IL7-4-1  
IL7-5  
IL7-5-1  
IL7-5-5  
IL8-1  
IL8-1-1  
IL8-1-5  
IL8-3  
IL9-1  
IL9-1-2  
IL9-2  
IL9-2-6  
IL9-3-1  
M82  
IL7-5-P5  
PENN

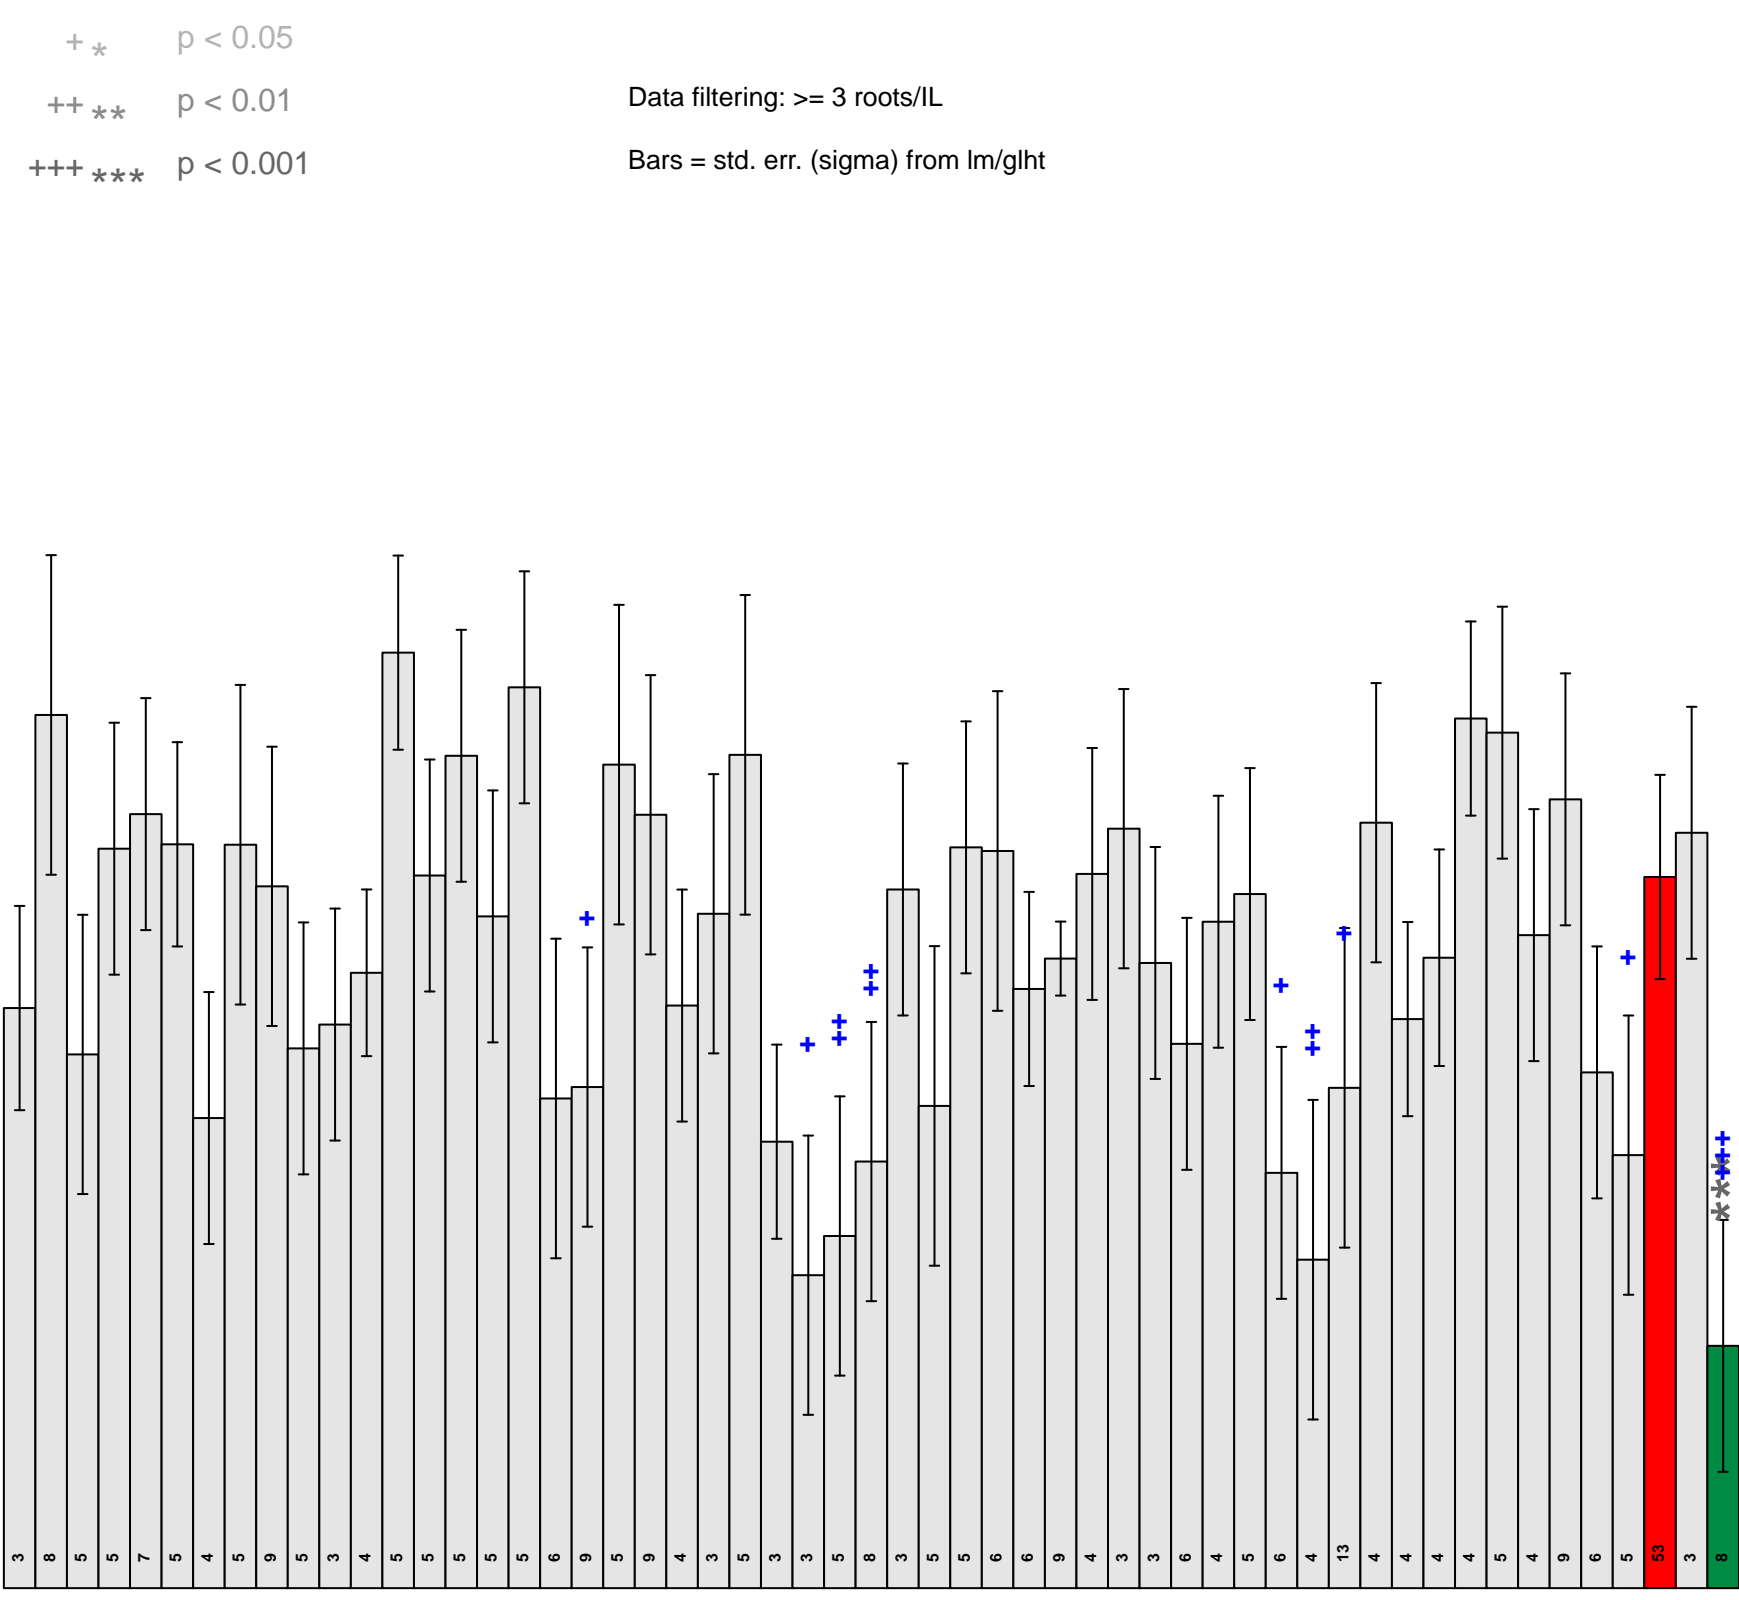



Angle Away T32

+ \*    p < 0.05  
++ \*\*    p < 0.01  
+++ \*\*\*    p < 0.001

Data filtering: >= 3 roots/IL

Bars = std. err. (sigma) from lm/glht

degrees

60  
50  
40  
30  
20  
10  
0

IL10-1  
IL10-2  
IL10-2-2  
IL10-3  
IL11-1  
IL11-2  
IL11-4  
IL11-4-1  
IL12-1  
IL12-1-1  
IL12-2  
IL12-3  
IL12-3-1  
IL12-4  
IL12-4-1  
IL1-1-2  
IL1-3  
IL1-4  
IL1-4-18  
IL2-1  
IL2-1-1  
IL2-2  
IL2-4  
IL2-6-5  
IL3-5  
IL4-1  
IL4-1-1  
IL4-3  
IL4-3-2  
IL4-4  
IL5-1  
IL5-2  
IL5-5  
IL6-1  
IL6-2  
IL6-4  
IL7-1  
IL7-3  
IL7-4  
IL7-4-1  
IL7-5  
IL7-5-1  
IL7-5-5  
IL8-1  
IL8-1-1  
IL8-1-5  
IL8-3  
IL9-1  
IL9-1-2  
IL9-2  
IL9-2-6  
IL9-3-1  
M82  
IL7-5-P5  
PENN

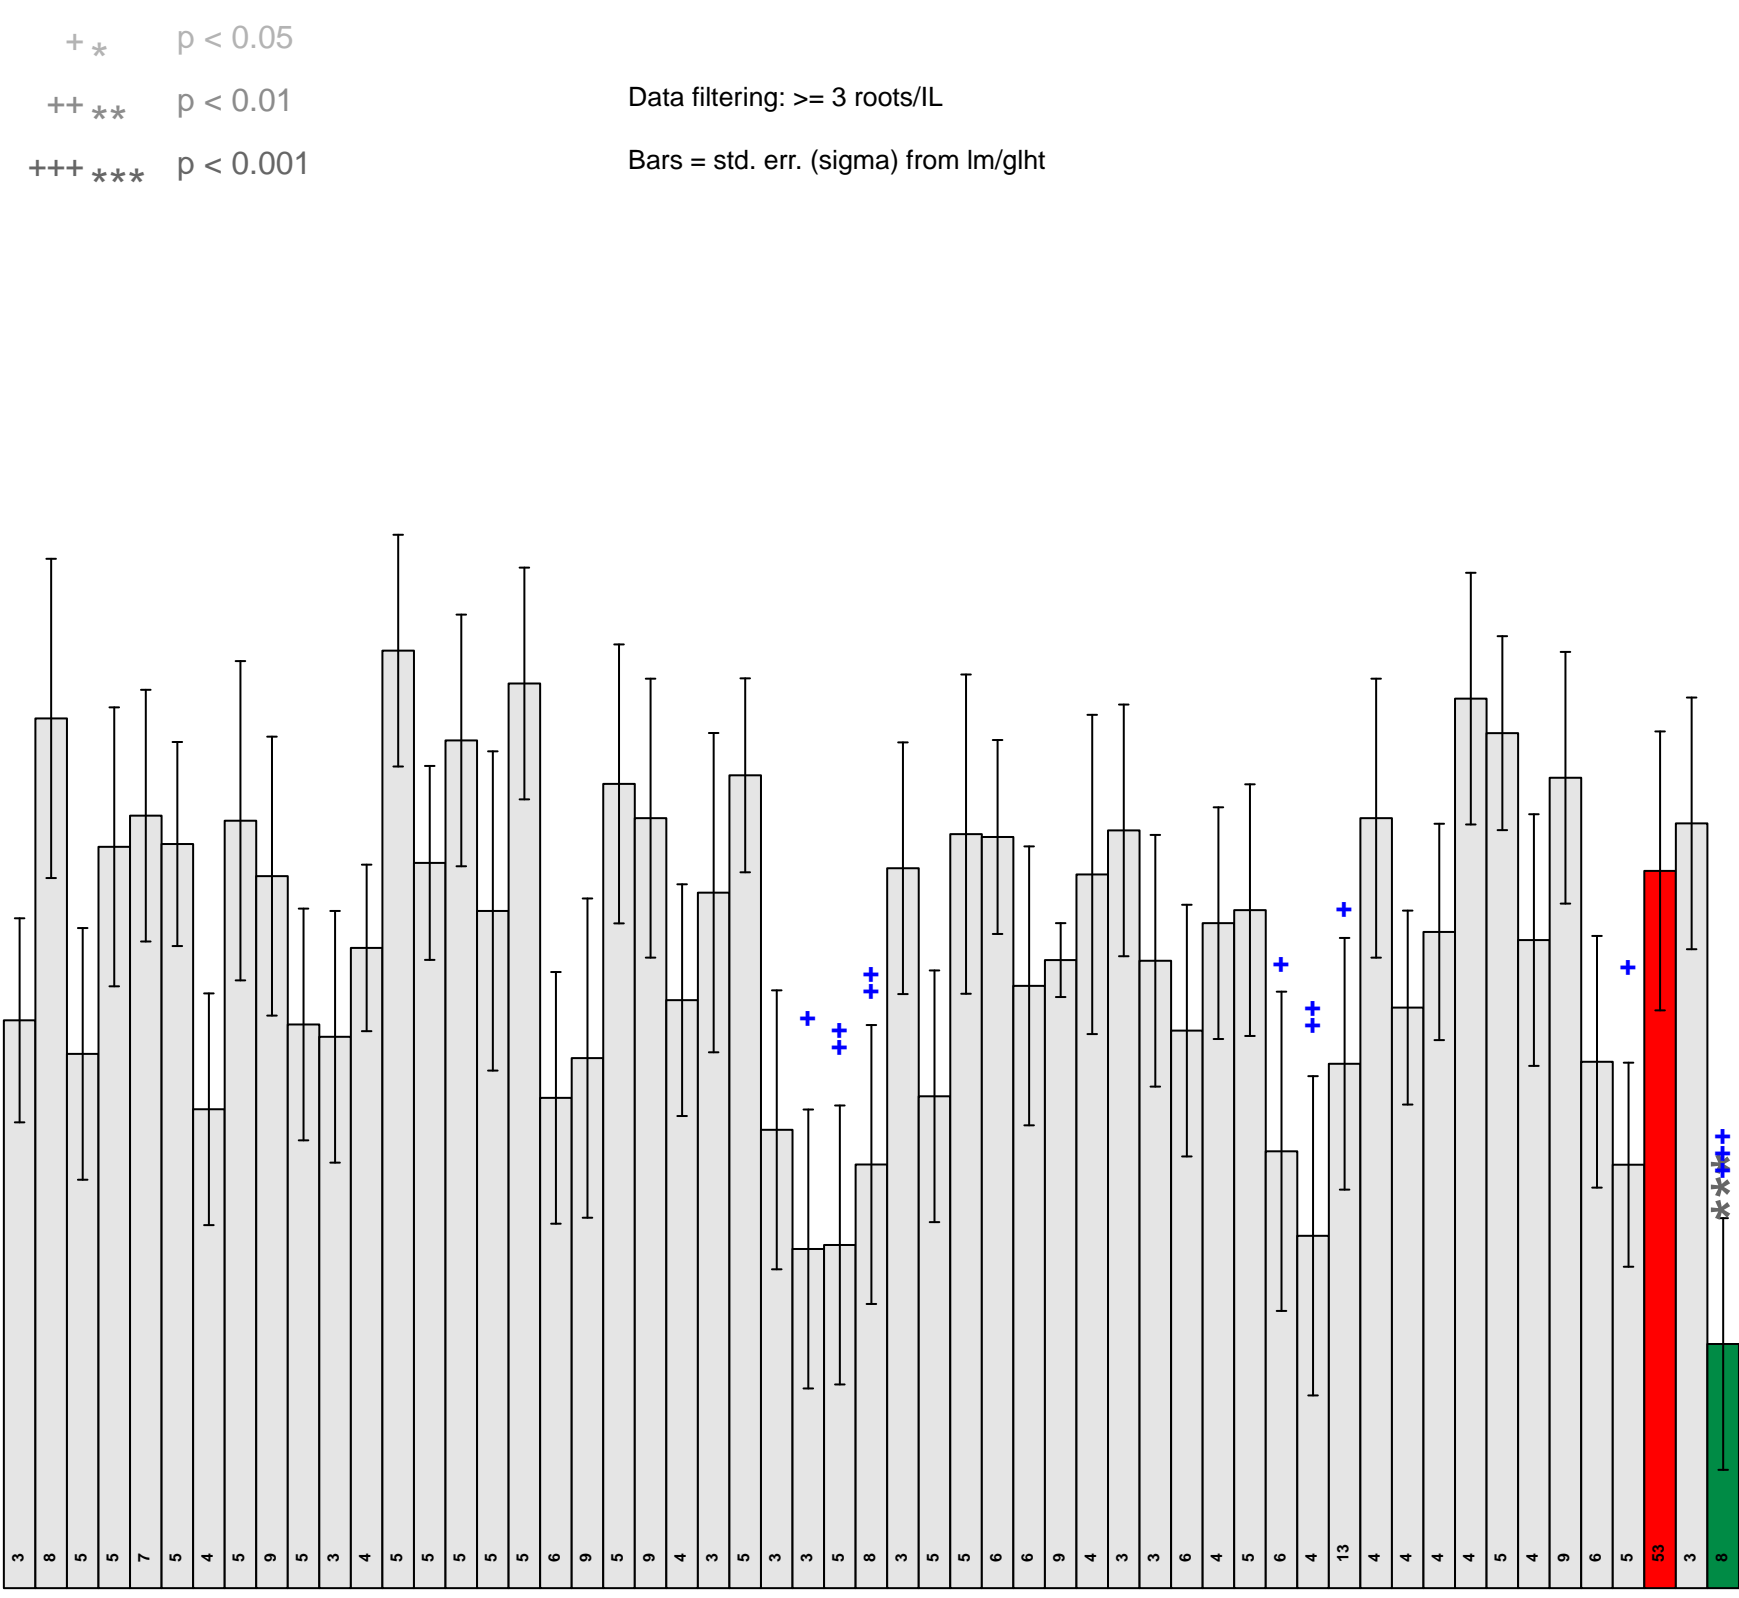

Angle Away T33

+ \*      p < 0.05  
++ \*\*    p < 0.01  
+++ \*\*\*   p < 0.001

Data filtering: >= 3 roots/IL

Bars = std. err. (sigma) from lm/glht

degrees

60  
50  
40  
30  
20  
10  
0

IL10-1  
IL10-2  
IL10-2-2  
IL10-3  
IL11-1  
IL11-2  
IL11-4  
IL11-4-1  
IL12-1  
IL12-1-1  
IL12-2  
IL12-3  
IL12-3-1  
IL12-4  
IL12-4-1  
IL1-1-2  
IL1-3  
IL1-4  
IL1-4-18  
IL2-1  
IL2-1-1  
IL2-2  
IL2-4  
IL2-6-5  
IL3-5  
IL4-1  
IL4-1-1  
IL4-3  
IL4-3-2  
IL4-4  
IL5-1  
IL5-2  
IL5-5  
IL6-1  
IL6-2  
IL6-4  
IL7-1  
IL7-3  
IL7-4  
IL7-4-1  
IL7-5  
IL7-5-1  
IL7-5-5  
IL8-1  
IL8-1-1  
IL8-1-5  
IL8-3  
IL9-1  
IL9-1-2  
IL9-2  
IL9-2-6  
IL9-3-1  
M82  
IL7-5-P5  
PENN

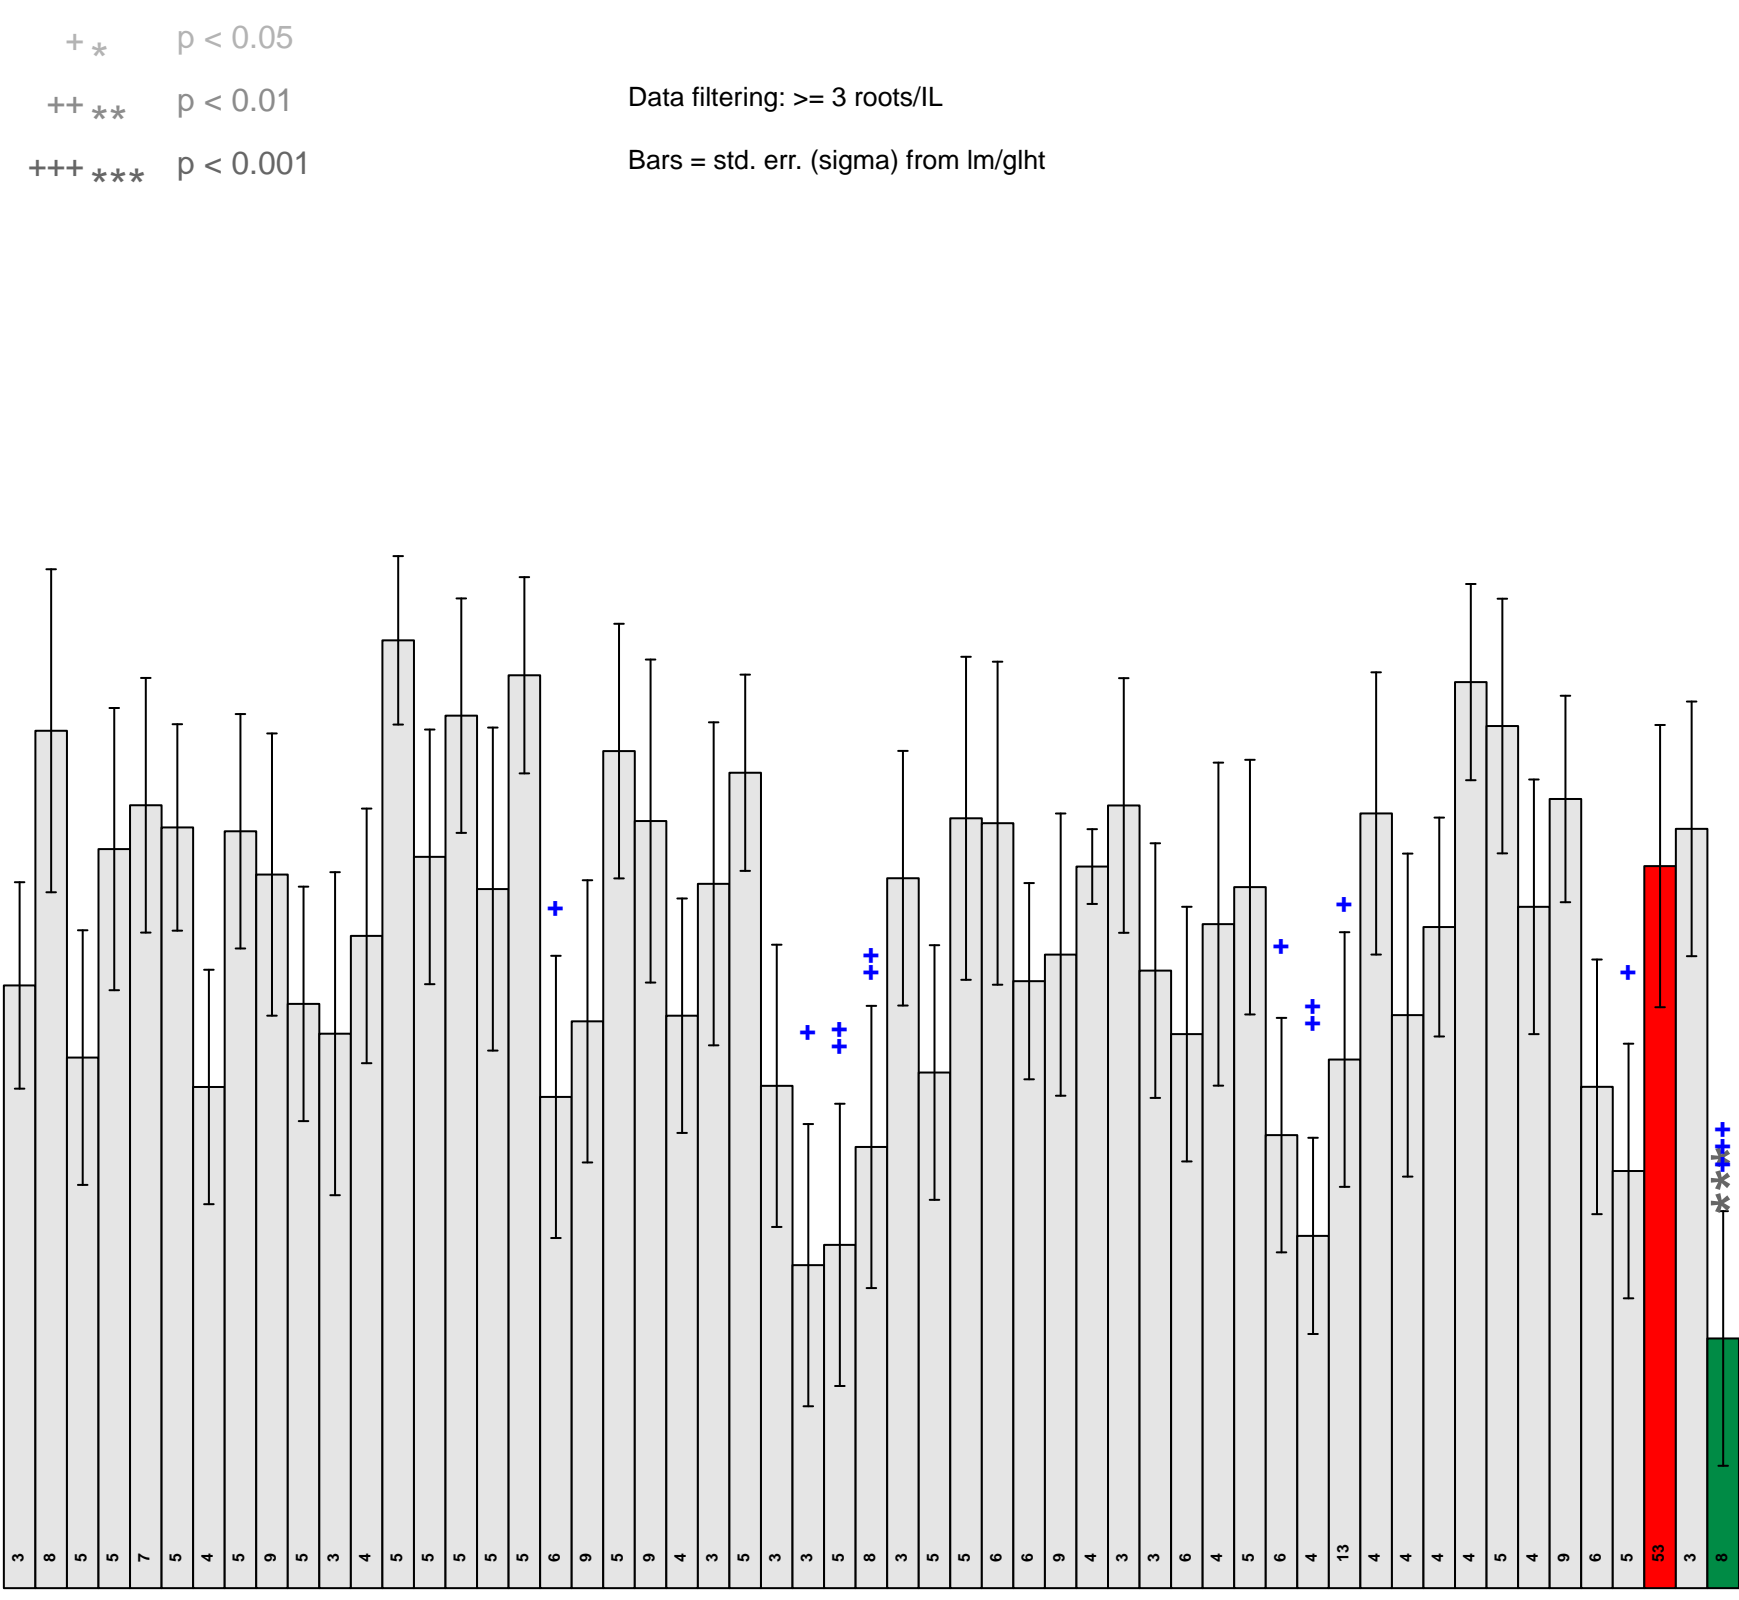

Supplement: Supplementary file 5 [file 2]
