# Supplementary material
Source: publisher figshare collection journal article supplement (https://gsajournals.figshare.com/articles/dataset/_/7237562)

M82 REP2 plate A – Experiment REP2  
Livingstone/roots.tsv

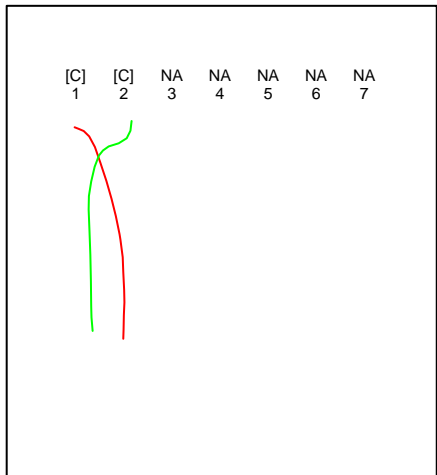

M82 REP2 plate B – Experiment REP2  
Livingstone/roots.tsv

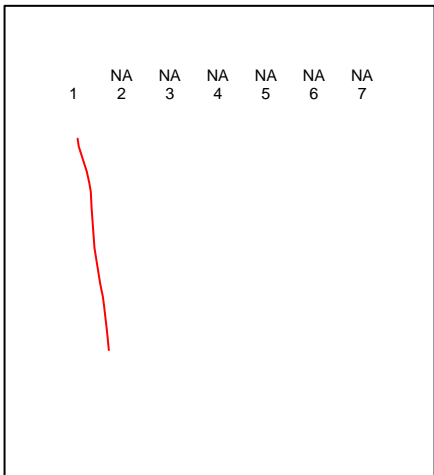

M82 REP2 plate C – Experiment REP2  
Livingstone/roots.tsv

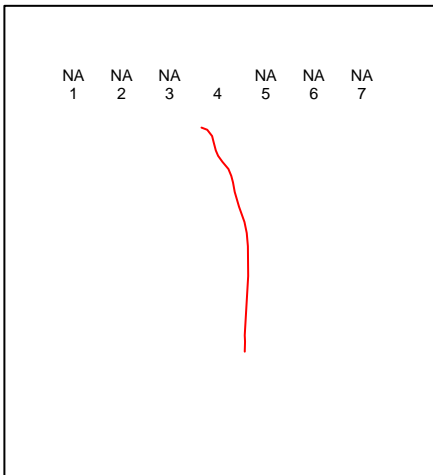

M82 REP2 plate D – Experiment REP2  
Livingstone/roots.tsv

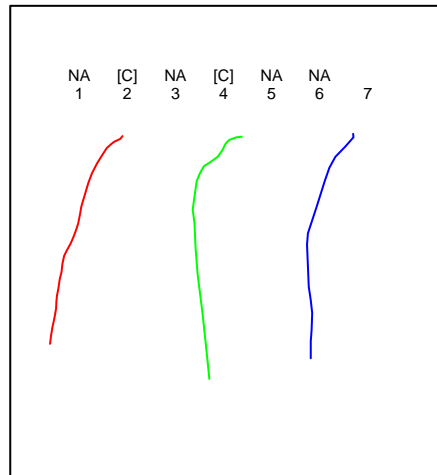

M82 REP3 plate A – Experiment REP3  
Livingstone/roots.tsv

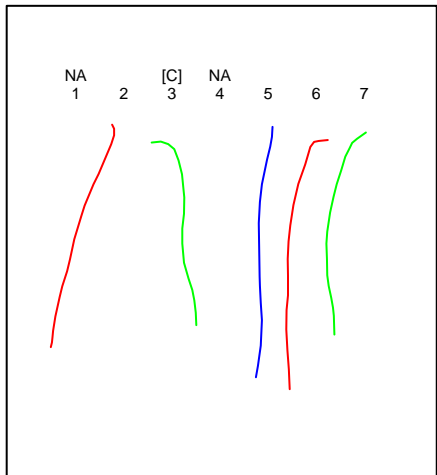

M82 REP3 plate C – Experiment REP3  
Livingstone/roots.tsv

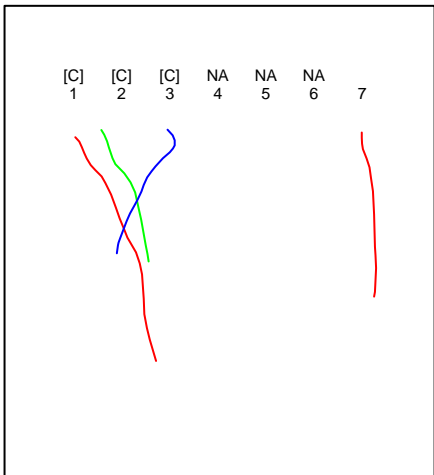

M82 REP3 plate D – Experiment REP3  
Livingstone/roots.tsv

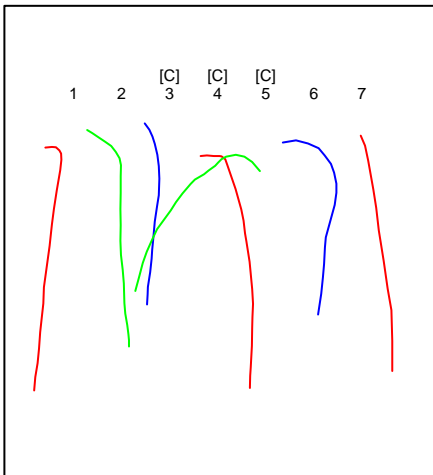

M82 REP4 plate A – Experiment REP4  
Livingstone/roots.tsv

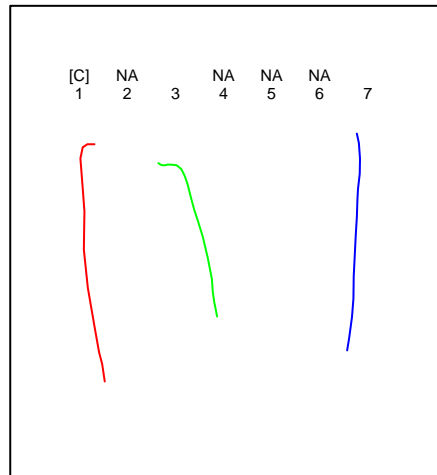

M82 REP4 plate B – Experiment REP4  
Livingstone/roots.tsv

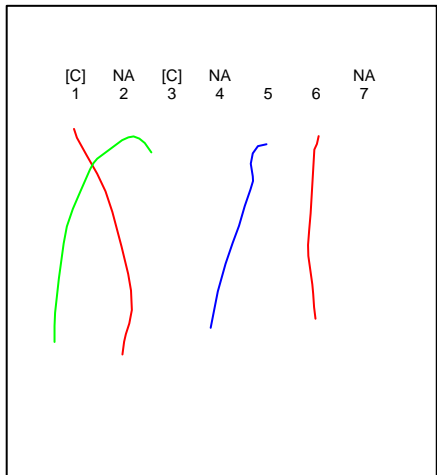

M82 REP4 plate C – Experiment REP4  
Livingstone/roots.tsv

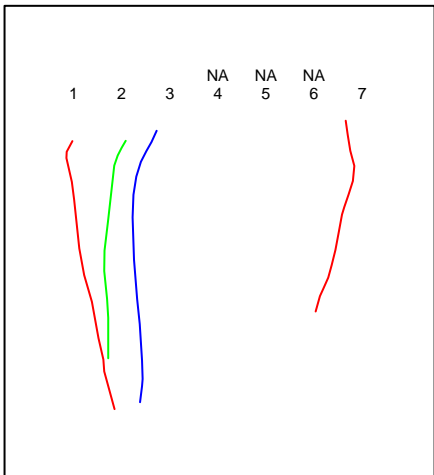

M82 REP4 plate D – Experiment REP4  
Livingstone/roots.tsv

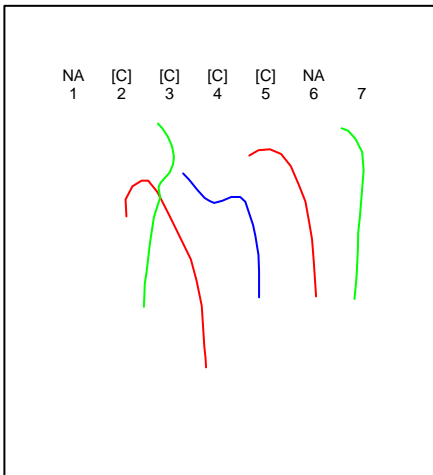

M82 REP5 plate A – Experiment REP5  
Livingstone/roots.tsv

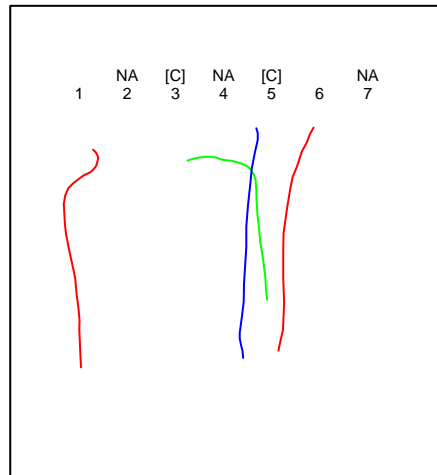

M82 REP5 plate B – Experiment REP5  
Livingstone/roots.tsv

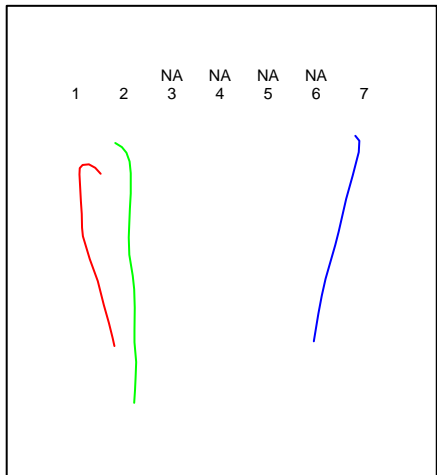

M82 REP5 plate C – Experiment REP5  
Livingstone/roots.tsv

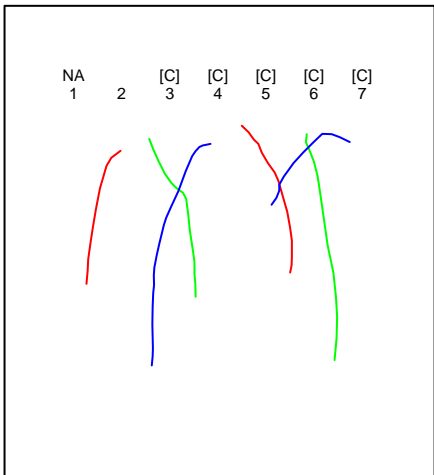

M82 REP5 plate D – Experiment REP5  
Livingstone/roots.tsv

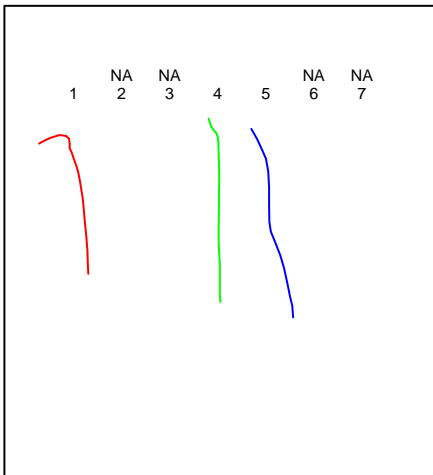

M82 REP4 plate A – Experiment REPX1  
SiobhanMeasurements/Results\_01\_15\_15.tsv

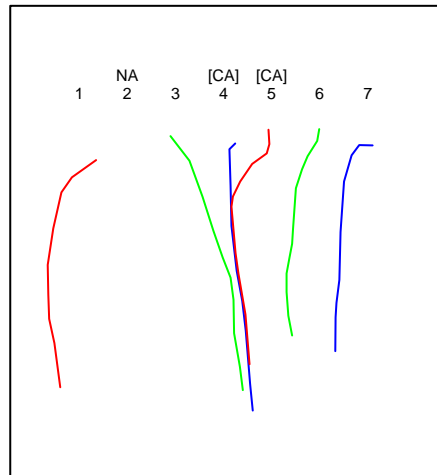

M82 REP4 plate B – Experiment REPX1  
SiobhanMeasurements/Results\_01\_15\_15.tsv

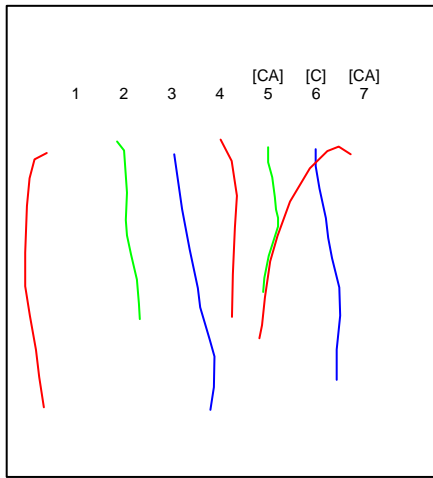

**PENN REP2 plate A – Experiment REP2**  
**Livingstone/roots.tsv**

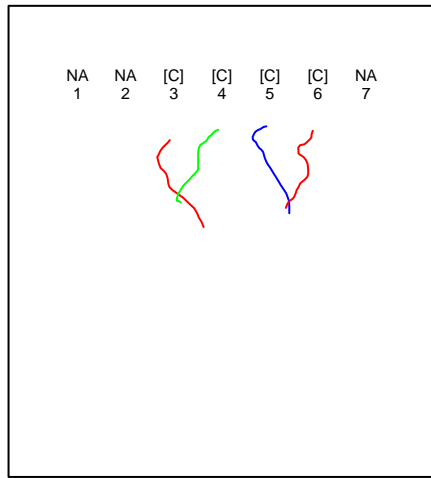

**PENN REP2 plate B – Experiment REP2**  
**Livingstone/roots.tsv**

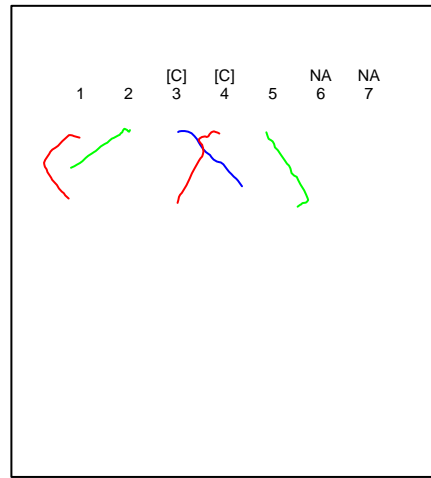

PENN REP2 plate C – Experiment REP2  
Livingstone/roots.tsv

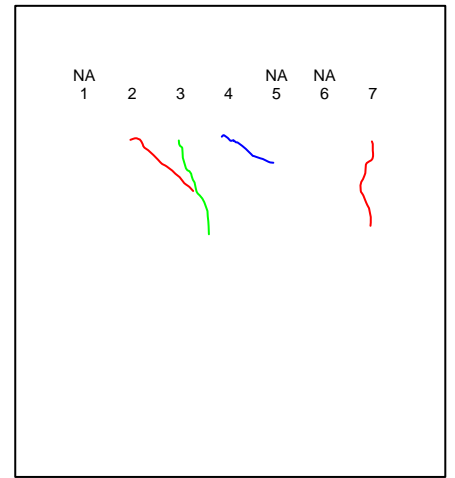

**PENN REP2 plate D – Experiment REP2**  
**Livingstone/roots.tsv**

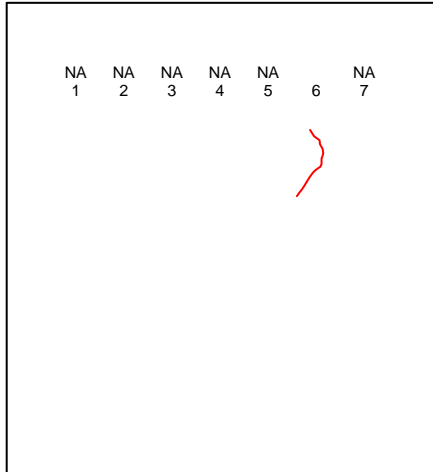

**PENN REP3 plate A – Experiment REP3**  
**Livingstone/roots.tsv**

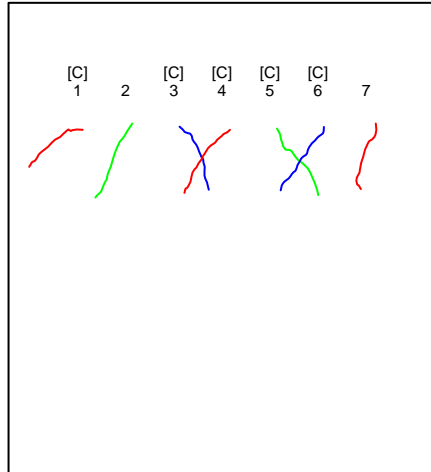

**PENN REP3 plate B – Experiment REP3**  
**Livingstone/roots.tsv**

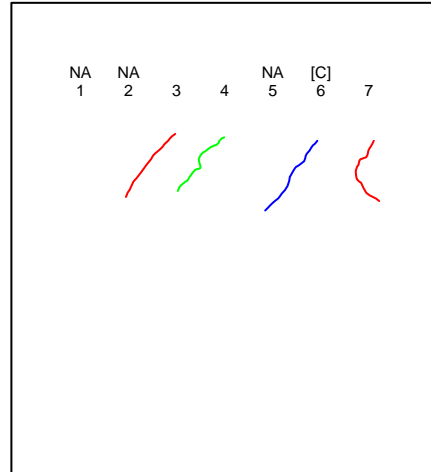

**PENN REP3 plate C – Experiment REP3**  
**Livingstone/roots.tsv**

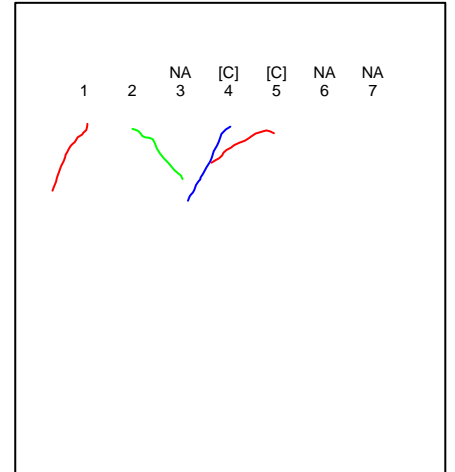

**PENN REP3 plate D – Experiment REP3**  
**Livingstone/roots.tsv**

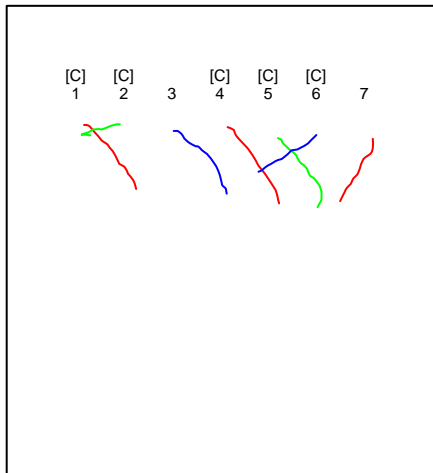

**PENN REP4 plate A – Experiment REP4**  
**SiobhanMeasurements/Results\_1\_1\_15.tsv**

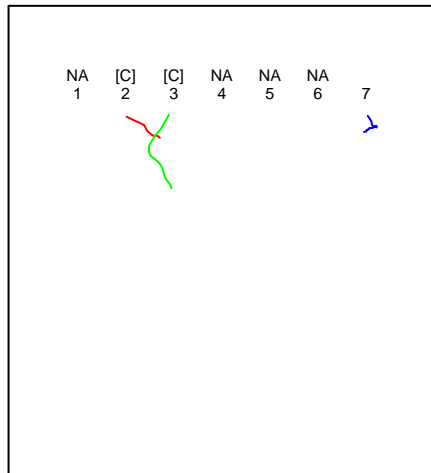

**PENN REP4 plate B – Experiment REP4**  
**SiobhanMeasurements/Results\_1\_1\_15.tsv**

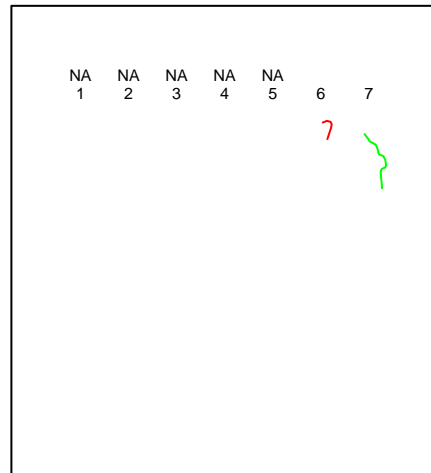

**PENN REP4 plate C – Experiment REP4**  
**SiobhanMeasurements/Results\_1\_1\_15.tsv**

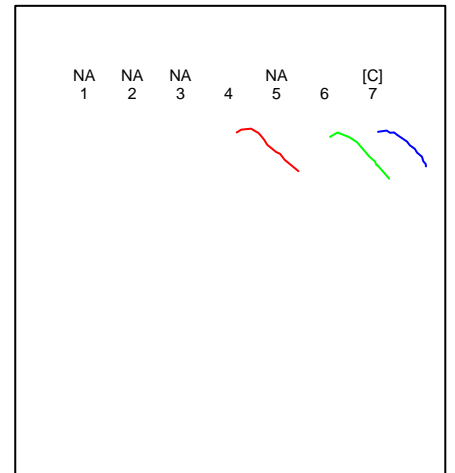

**PENN REP4 plate D – Experiment REP4**  
**SiobhanMeasurements/Results\_1\_1\_15.tsv**

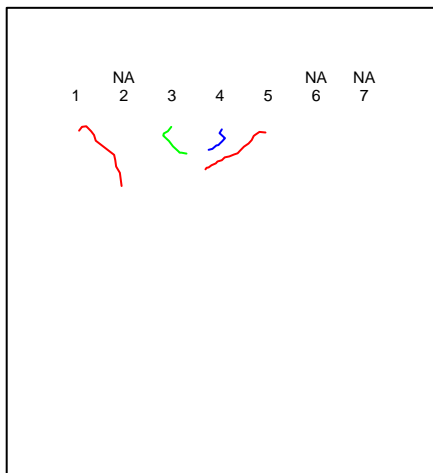

**PENN REP5 plate A – Experiment REP5**  
**Livingstone/roots.tsv**

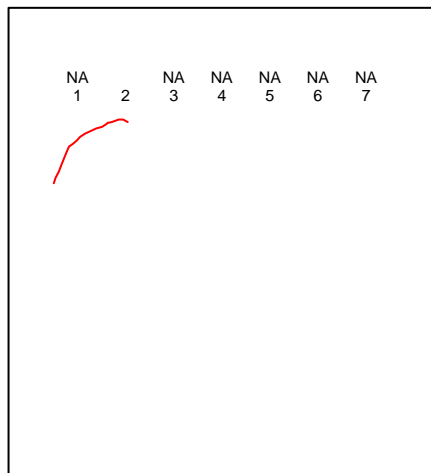

**PENN REP5 plate B – Experiment REP5**  
**Livingstone/roots.tsv**

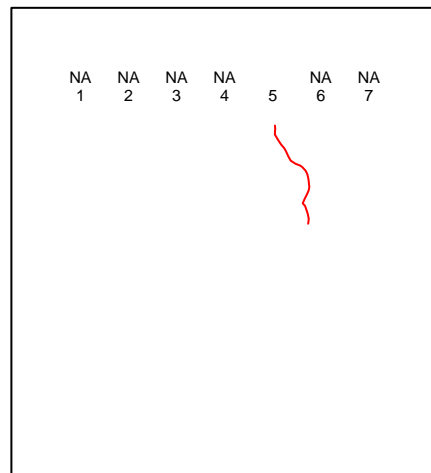

**PENN REP5 plate C – Experiment REP5**  
**Livingstone/roots.tsv**

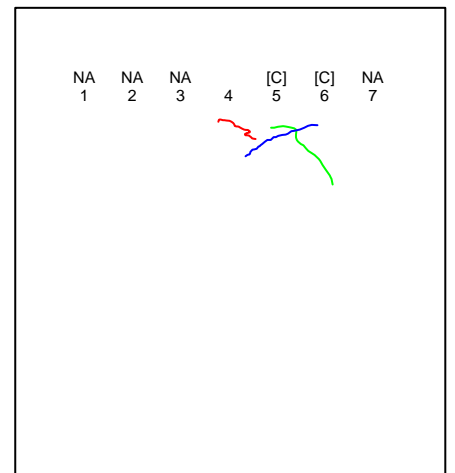

PENN REP5 plate D – Experiment REP5  
Livingstone/roots.tsv

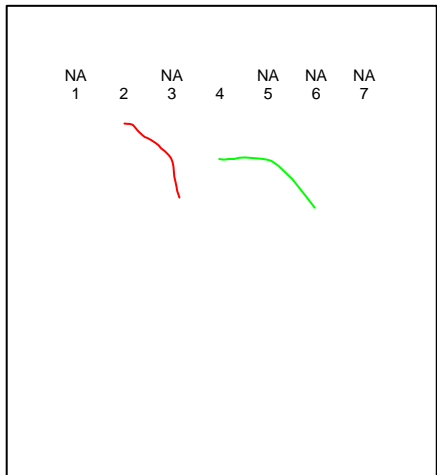

PENN REP4 plate A – Experiment REPX1  
SiobhanMeasurements/Results\_1\_1\_15.tsv

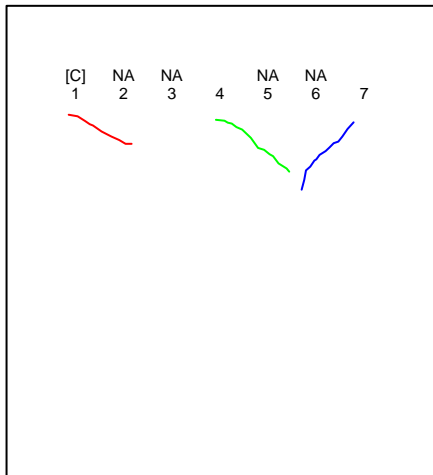

PENN REP4 plate B – Experiment REPX1  
SiobhanMeasurements/Results\_1\_1\_15.tsv

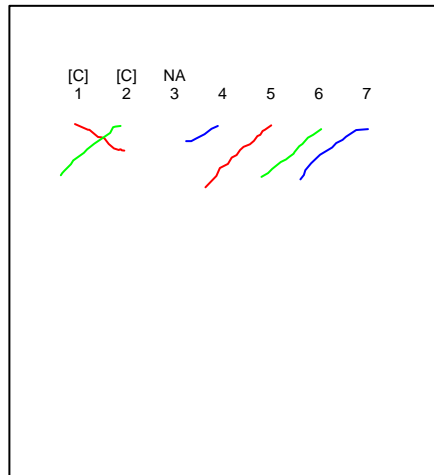

PENN REP4 plate C – Experiment REPX1  
SiobhanMeasurements/Results\_1\_1\_15.tsv

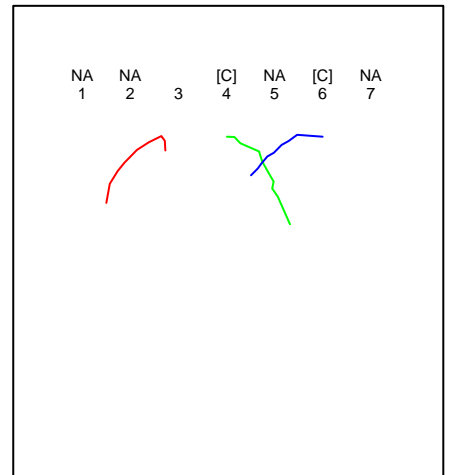

PENN REP4 plate D – Experiment REPX1  
SiobhanMeasurements/Results\_1\_1\_15.tsv

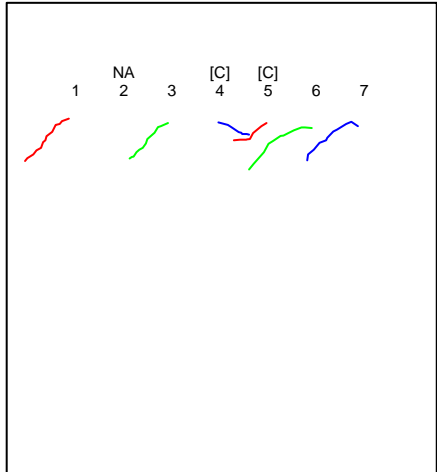

PENN REP4 plate E – Experiment REPX1  
SiobhanMeasurements/Results\_1\_1\_15.tsv

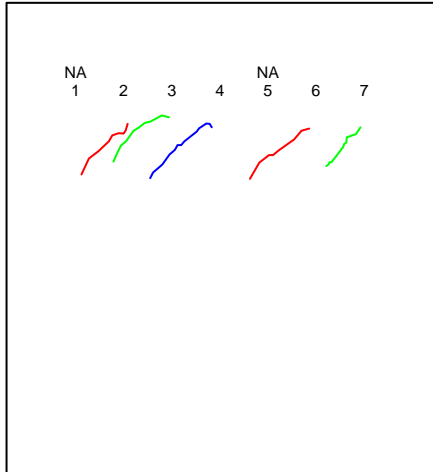

IL1–1 REP2 plate A – Experiment REP2  
Livingstone/roots.tsv

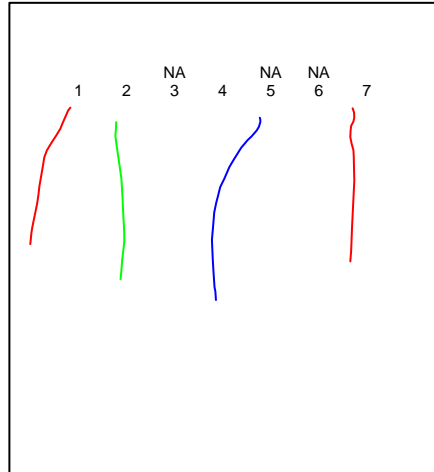

IL1–1 REP2 plate B – Experiment REP2  
Livingstone/roots.tsv

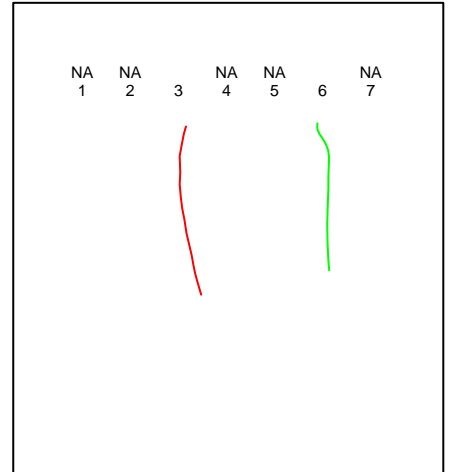

IL1–1 REP3 plate A – Experiment REP3  
Livingstone/roots.tsv

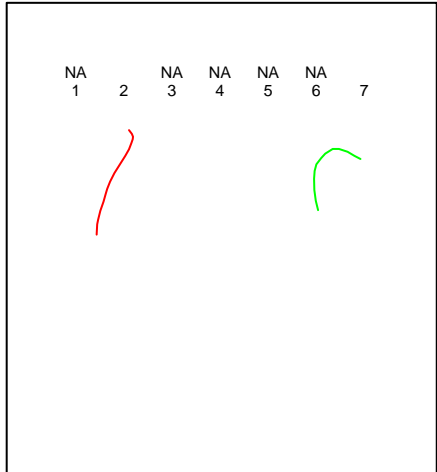

IL1–1 REP3 plate B – Experiment REP3  
Livingstone/roots.tsv

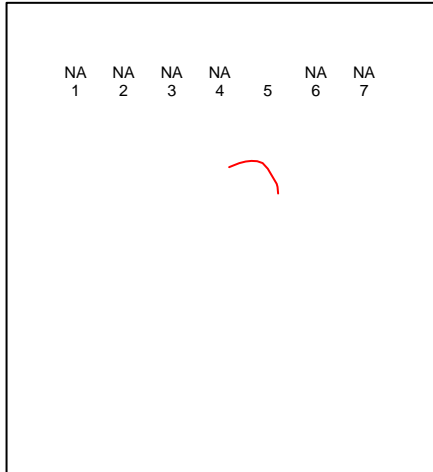

IL1–1 REP4 plate B – Experiment REP4  
Livingstone/roots.tsv

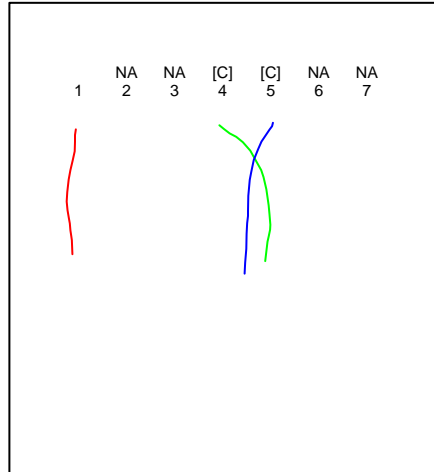

IL1–1–2 REP2 plate A – Experiment REP2  
Livingstone/roots.tsv

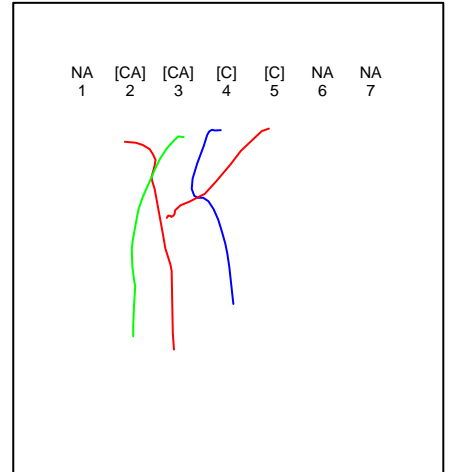

IL1–1–2 REP2 plate B – Experiment REP2  
Livingstone/roots.tsv

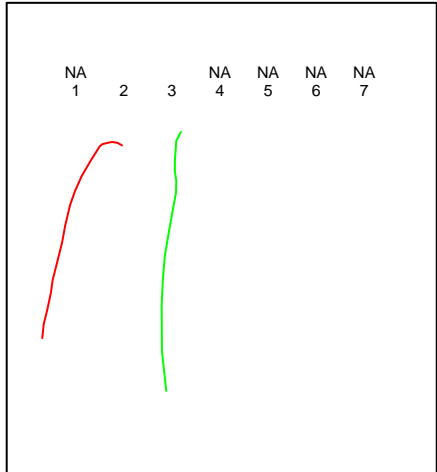

IL1–1–2 REP3 plate A – Experiment REP3  
Livingstone/roots.tsv

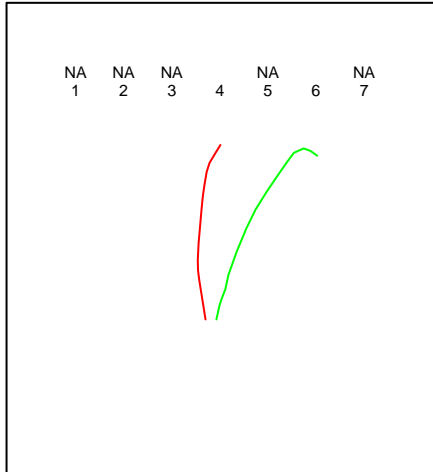

IL1–1–2 REP3 plate B – Experiment REP3  
Livingstone/roots.tsv

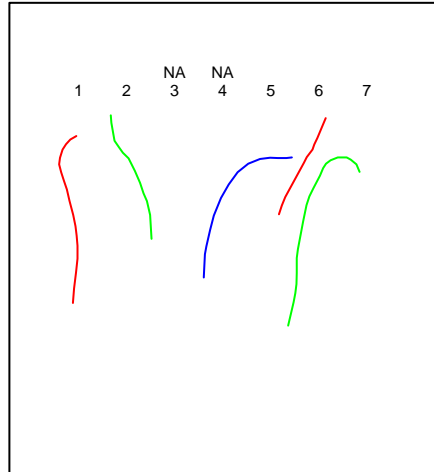

IL1–1–2 REP4 plate A – Experiment REP4  
Livingstone/roots.tsv

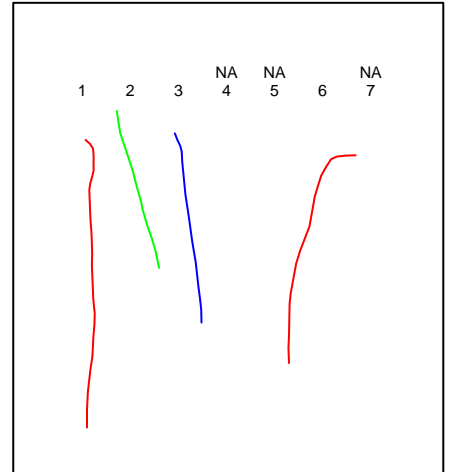

IL1-1-2 REP5 plate A – Experiment REP5  
Livingstone/roots.tsv

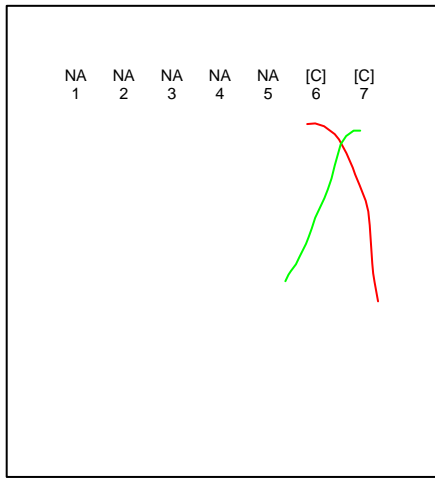

IL1-1-2 REP5 plate B – Experiment REP5  
Livingstone/roots.tsv

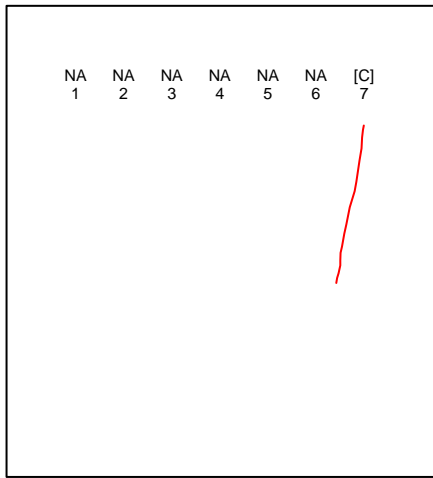

IL1-1-3 REP2 plate A – Experiment REP2  
SiobhanMeasurements/Siobhan\_Results\_11\_27.tsv

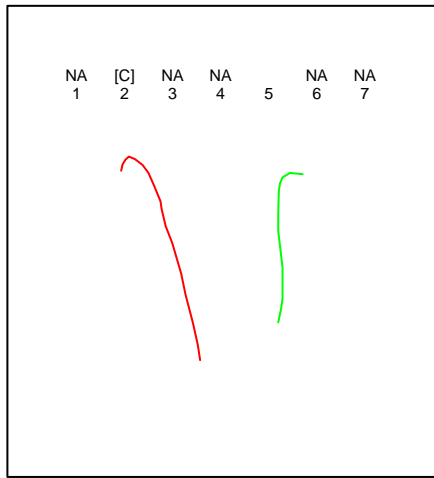

IL1-1-3 REP2 plate B – Experiment REP2  
SiobhanMeasurements/Siobhan\_Results\_11\_27.tsv

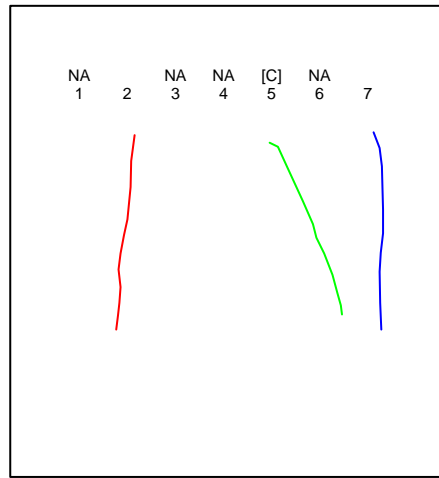

IL1-1-3 REP3 plate A – Experiment REP3  
SiobhanMeasurements/Siobhan\_Results\_11\_27.tsv

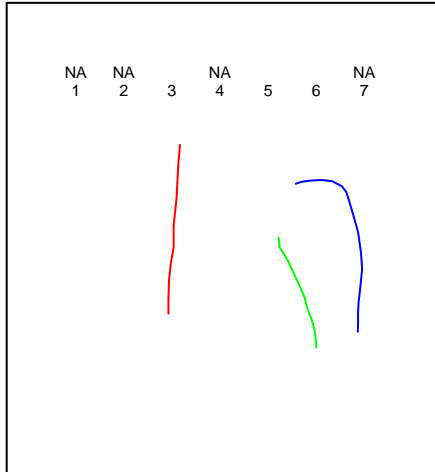

IL1-1-3 REP3 plate B – Experiment REP3  
SiobhanMeasurements/Siobhan\_Results\_11\_27.tsv

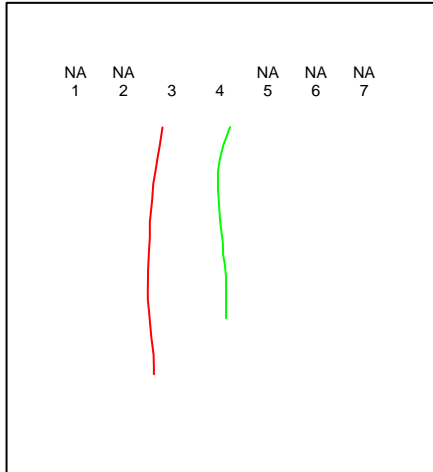

IL1-1-3 REP4 plate A – Experiment REP4  
SiobhanMeasurements/Siobhan\_Results\_11\_27.tsv

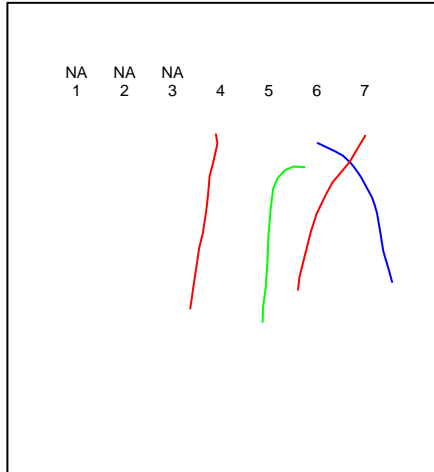

IL1-1-3 REP4 plate C – Experiment REP4  
SiobhanMeasurements/Siobhan\_Results\_11\_27.tsv

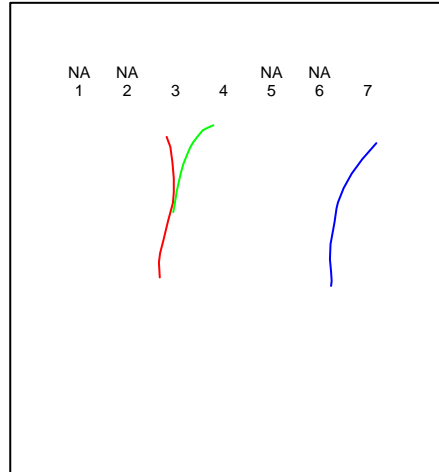

IL1-1-3 REP5 plate A – Experiment REP5  
SiobhanMeasurements/Siobhan\_Results\_11\_27.tsv

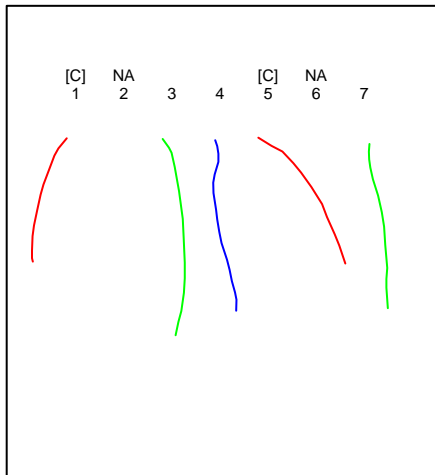

IL1-1-3 REP5 plate B – Experiment REP5  
SiobhanMeasurements/Siobhan\_Results\_11\_27.tsv

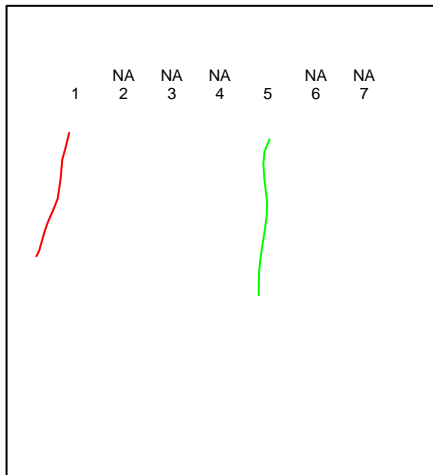

IL1-1-3 REP5 plate C – Experiment REP5  
SiobhanMeasurements/Siobhan\_Results\_11\_27.tsv

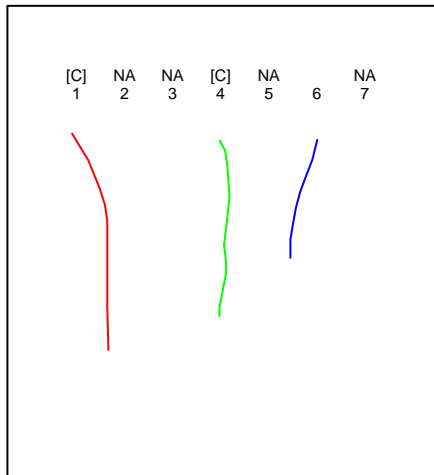

IL1-1-3 UNKN plate A – Experiment REPX5  
SiobhanMeasurements/Results\_01\_15\_15.tsv

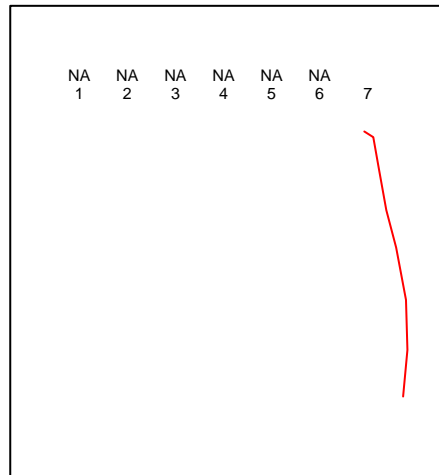

IL1-1-3 UNKN plate C – Experiment REPX5  
SiobhanMeasurements/Results\_01\_15\_15.tsv

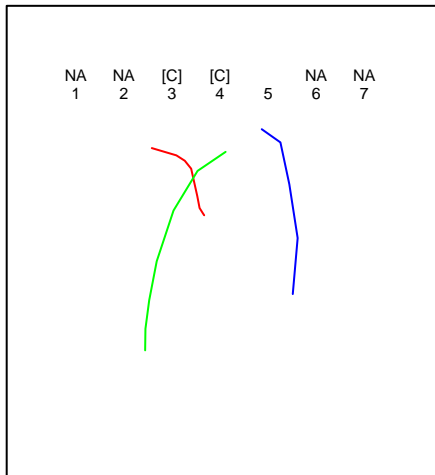

IL1-1-3 UNKN plate A – Experiment REPX6  
SiobhanMeasurements/Results\_01\_15\_15.tsv

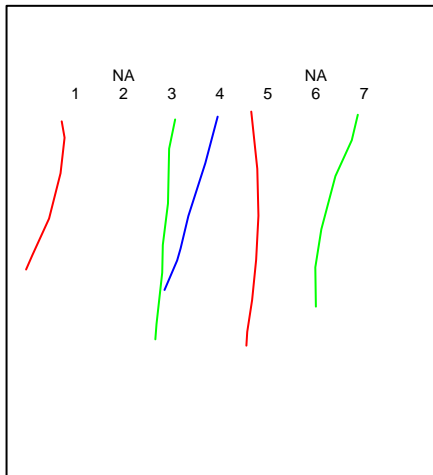

IL1-1-3 UNKN plate B – Experiment REPX6  
SiobhanMeasurements/Results\_01\_15\_15.tsv

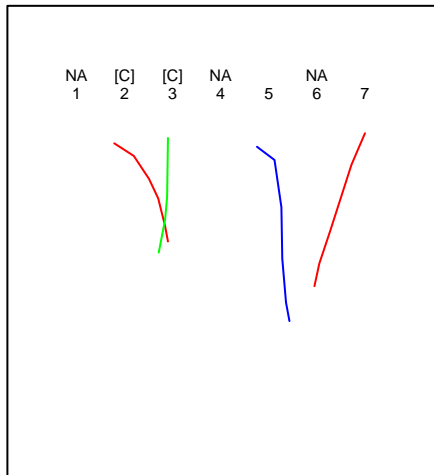

IL1-1-3 UNKN plate C – Experiment REPX6  
SiobhanMeasurements/Results\_01\_15\_15.tsv

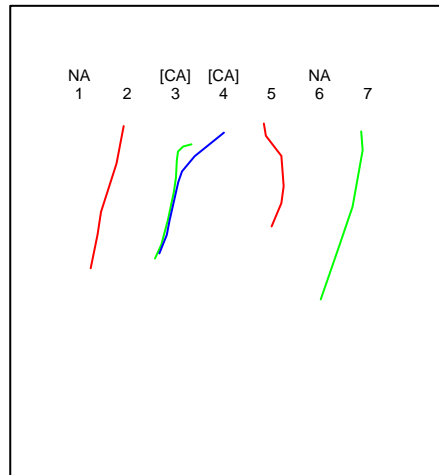

IL1-1-4 UNKN plate A – Experiment REPX1  
SiobhanMeasurements/Results\_01\_15\_15.tsv

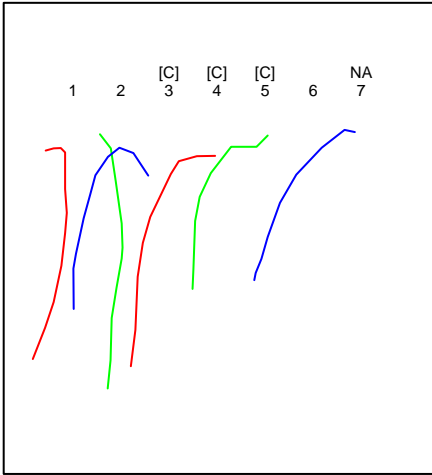

IL1-1-4 UNKN plate B – Experiment REPX1  
SiobhanMeasurements/Results\_01\_15\_15.tsv

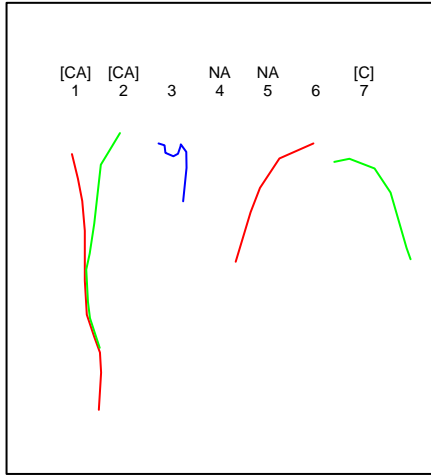

IL1-1-4 UNKN plate C – Experiment REPX2  
SiobhanMeasurements/Results\_01\_15\_15.tsv

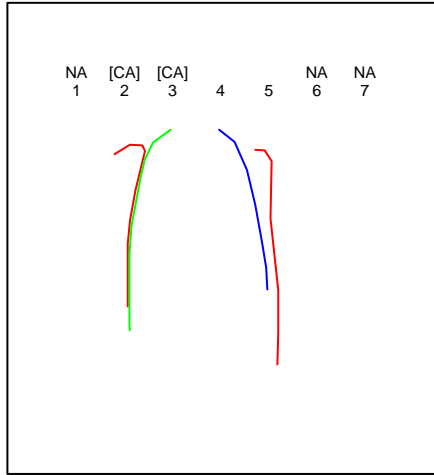

IL1-1-4 UNKN plate A – Experiment REPX3  
SiobhanMeasurements/Results\_01\_15\_15.tsv

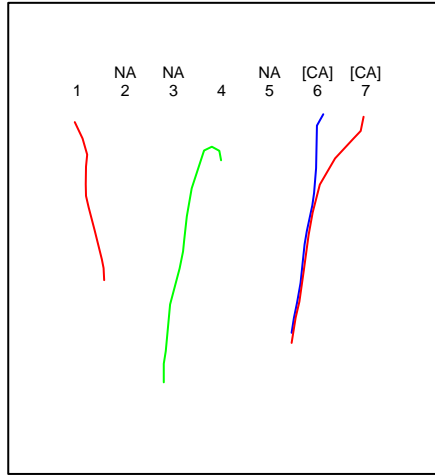

IL1-1-4 UNKN plate C – Experiment REPX3  
SiobhanMeasurements/Results\_01\_15\_15.tsv

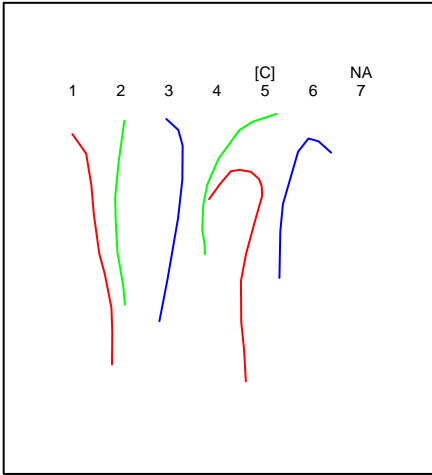

IL1-1-4 UNKN plate A – Experiment REPX4  
SiobhanMeasurements/Results\_01\_15\_15.tsv

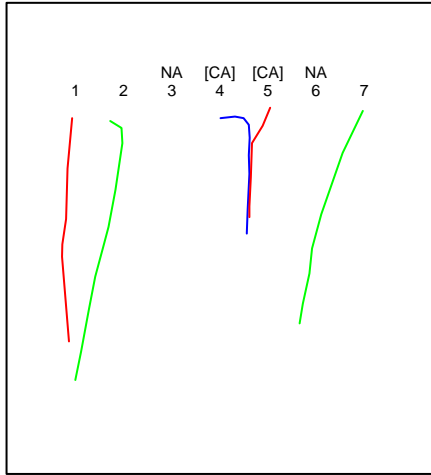

IL1-1-4 UNKN plate B – Experiment REPX4  
SiobhanMeasurements/Results\_01\_15\_15.tsv

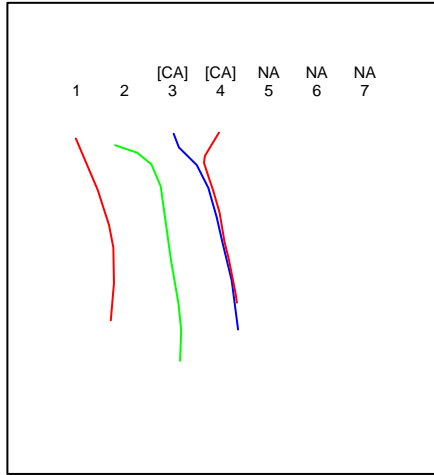

IL1-1-4 UNKN plate C – Experiment REPX4  
SiobhanMeasurements/Results\_01\_15\_15.tsv

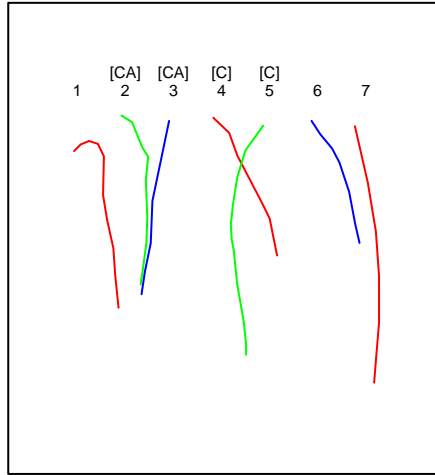

IL1-1-4 UNKN plate A – Experiment REPX6  
SiobhanMeasurements/Results\_01\_15\_15.tsv

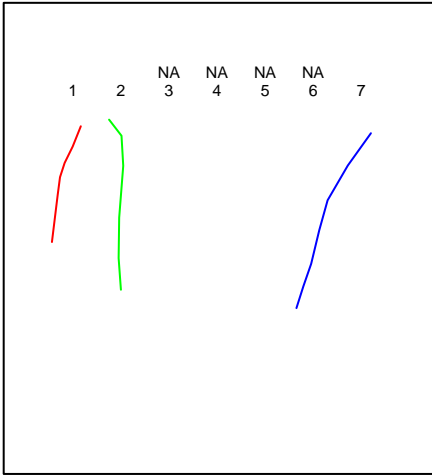

IL1-1-4 UNKN plate B – Experiment REPX6  
SiobhanMeasurements/Results\_01\_15\_15.tsv

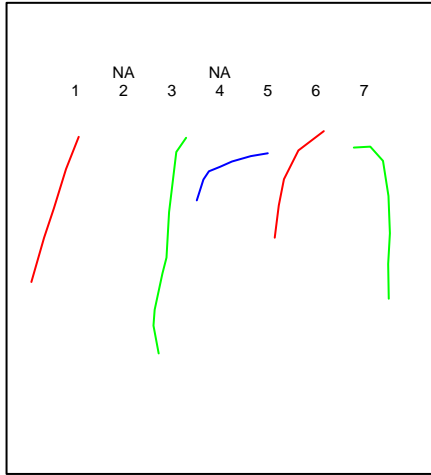

IL1-1-4 UNKN plate C – Experiment REPX6  
SiobhanMeasurements/Results\_01\_15\_15.tsv

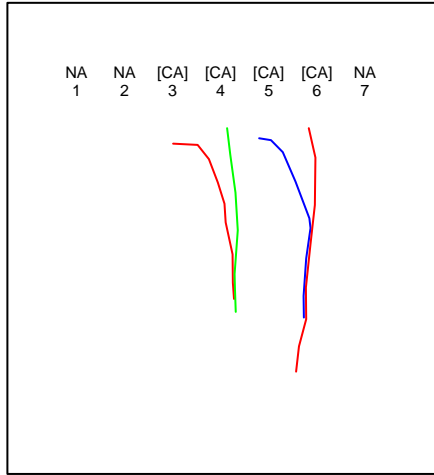

IL1-3 REP2 plate A – Experiment REP2  
Livingstone/roots.tsv

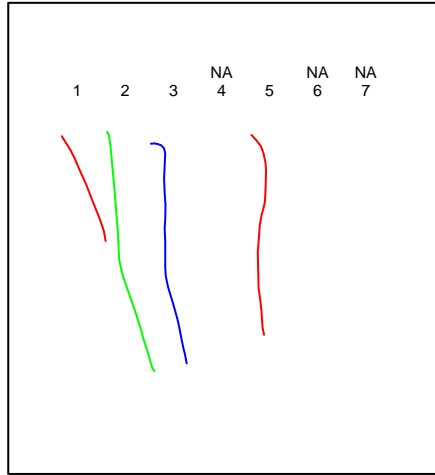

IL1-3 REP2 plate B – Experiment REP2  
Livingstone/roots.tsv

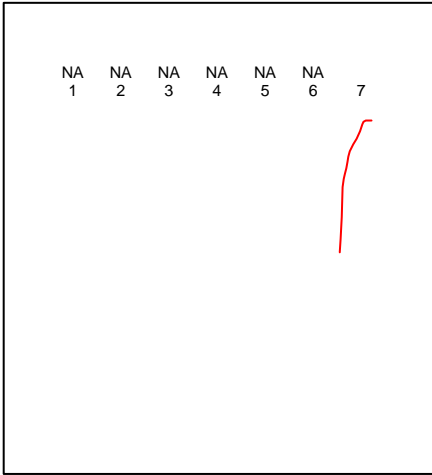

IL1-3 REP3 plate A – Experiment REP3  
Livingstone/roots.tsv

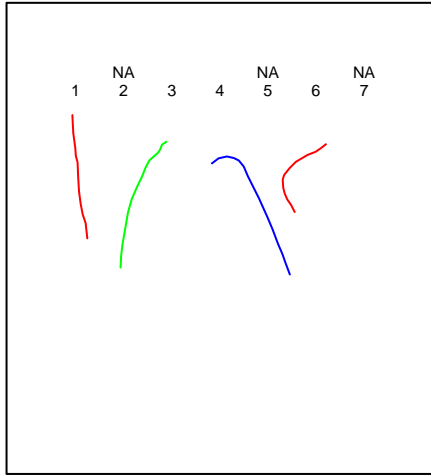

IL1-3 REP3 plate B – Experiment REP3  
Livingstone/roots.tsv

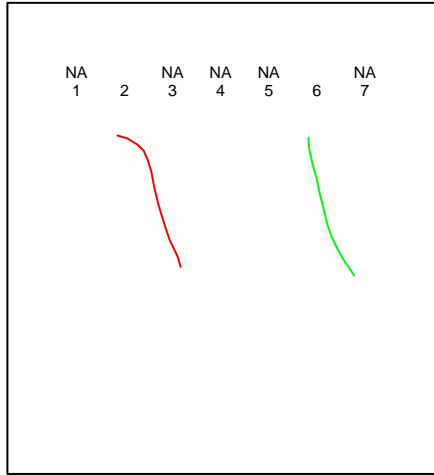

IL1-3 REP4 plate A – Experiment REP4  
Livingstone/roots.tsv

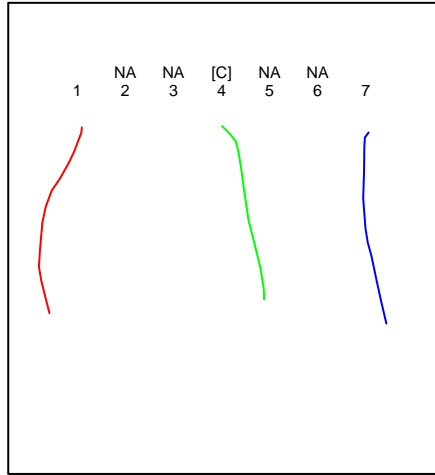

IL1-3 REP4 plate B – Experiment REP4  
Livingstone/roots.tsv

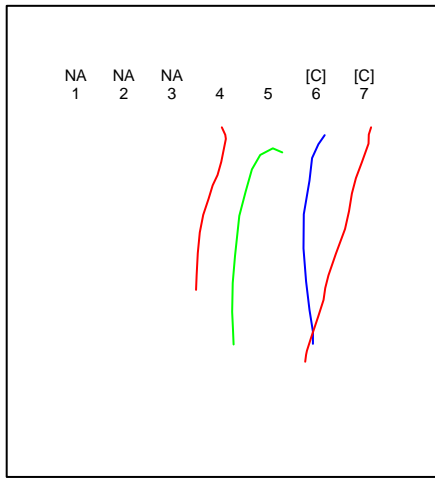

IL1-3 REP5 plate A – Experiment REP5  
Livingstone/roots.tsv

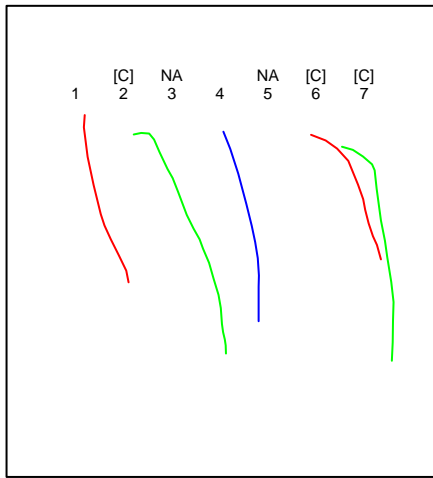

IL1-3 REP5 plate B – Experiment REP5  
Livingstone/roots.tsv

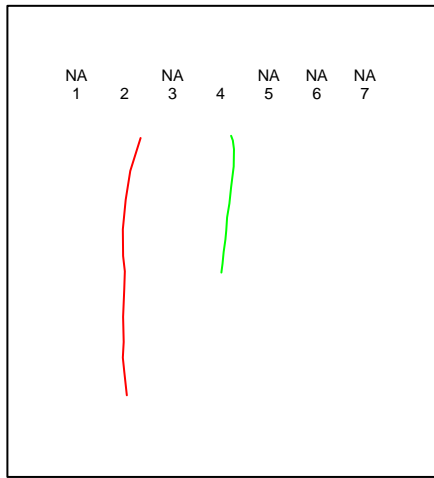

IL1-3 REP3 plate A - Experiment REPX1  
SiobhanMeasurements/Results\_1\_1\_15.tsv

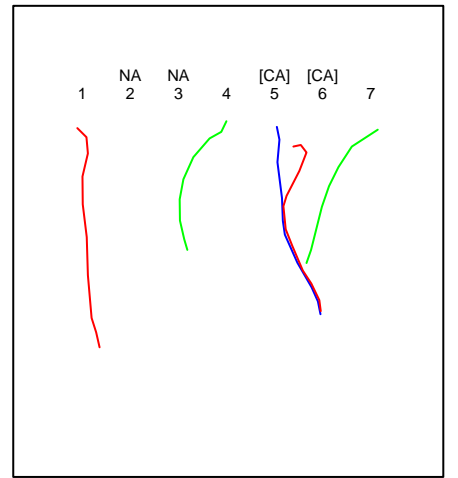

IL1-3 REP3 plate B – Experiment REPX1  
SiobhanMeasurements/Results\_1\_1\_15.tsv

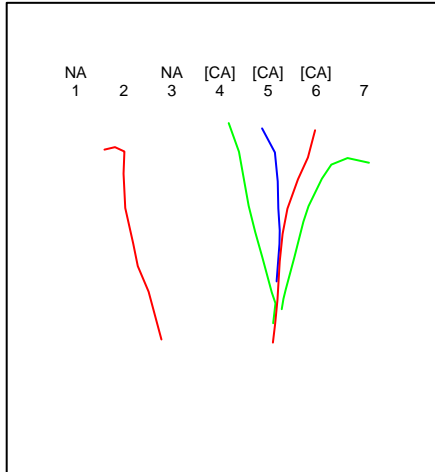

IL1-3 REP3 plate C – Experiment REPX1  
SiobhanMeasurements/Results\_1\_1\_15.tsv

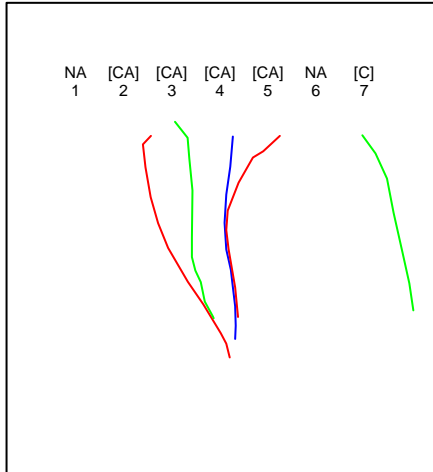

IL1-4 REP2 plate A – Experiment REP2  
SiobhanMeasurements/Results\_1\_1\_15.tsv

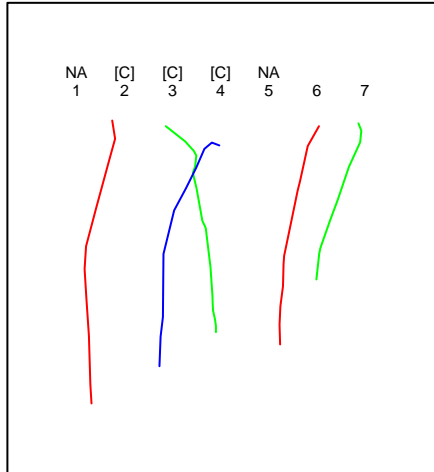

IL1-4 REP2 plate B - Experiment REP2  
SiobhanMeasurements/Results\_1\_1\_15.tsv

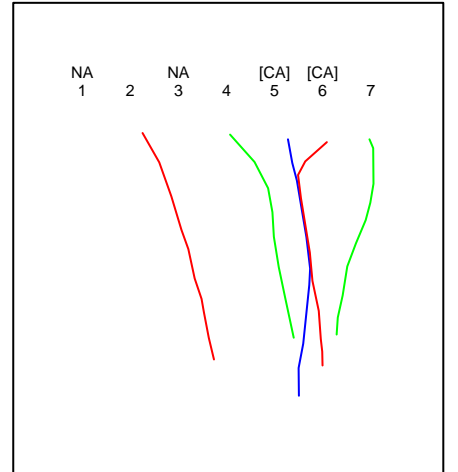

IL1-4 REP3 plate A – Experiment REP3  
SiobhanMeasurements/Results\_1\_1\_15.tsv

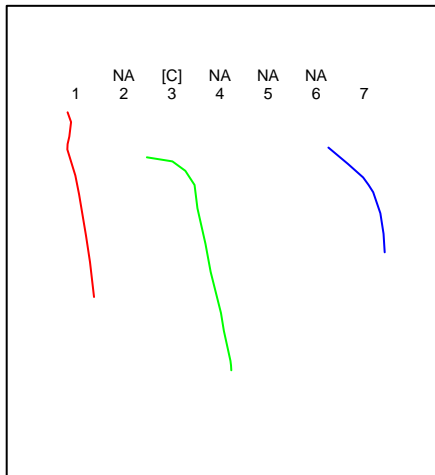

IL1-4 REP3 plate B – Experiment REP3  
SiobhanMeasurements/Results\_1\_1\_15.tsv

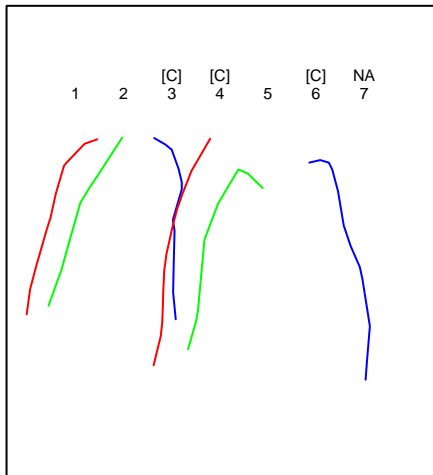

IL1-4 REP4 plate A – Experiment REP4  
SiobhanMeasurements/Results\_1\_1\_15.tsv

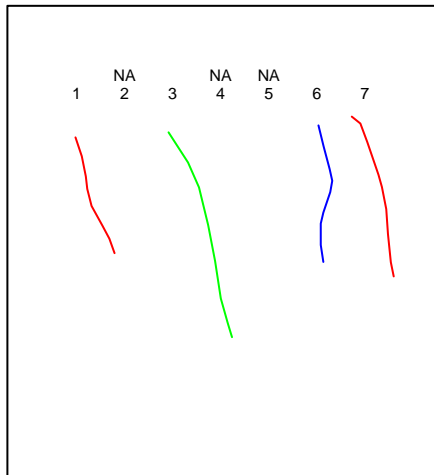

IL1-4 REP4 plate B – Experiment REP4  
SiobhanMeasurements/Results\_1\_1\_15.tsv

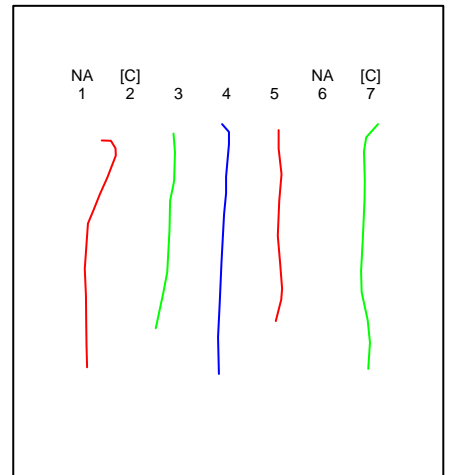

IL1-4 REP5 plate A – Experiment REP5  
SiobhanMeasurements/Results\_1\_1\_15.tsv

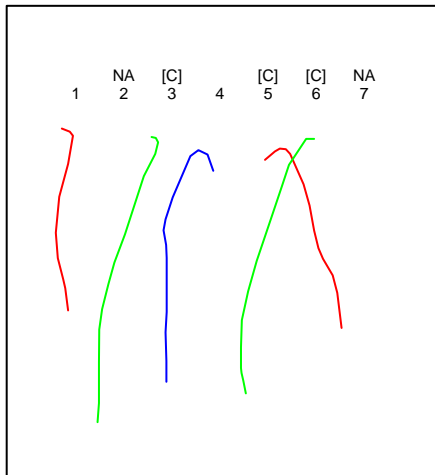

IL1-4 REP5 plate B – Experiment REP5  
SiobhanMeasurements/Results\_1\_1\_15.tsv

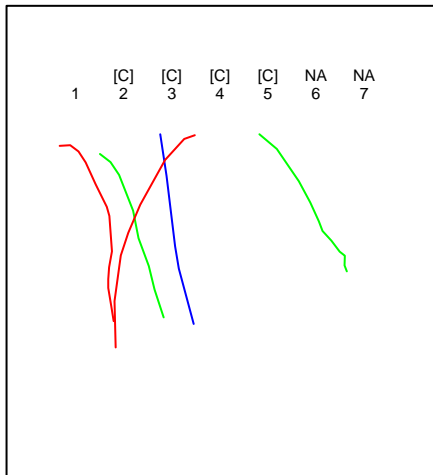

IL1-4-18 REP2 plate A – Experiment REP2  
SiobhanMeasurements/Results\_1\_1\_15.tsv

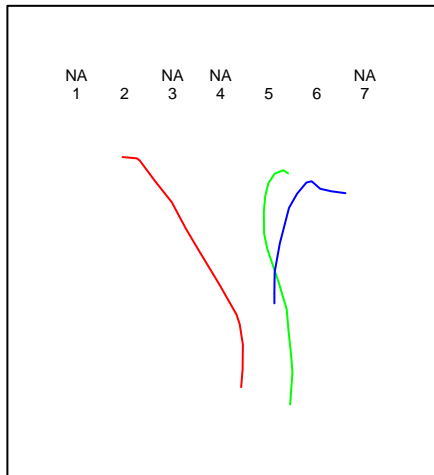

IL1-4-18 REP2 plate B - Experiment REP2  
SiobhanMeasurements/Results\_1\_1\_15.tsv

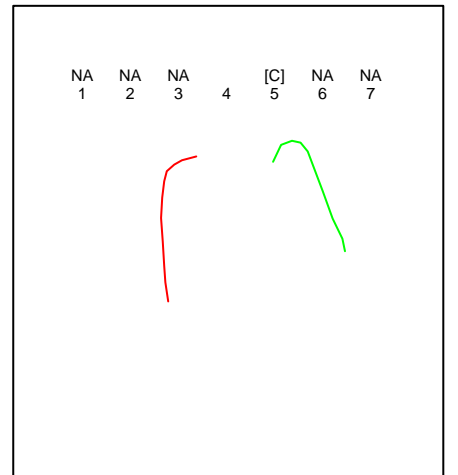

IL1-4-18 REP3 plate A – Experiment REP3  
SiobhanMeasurements/Results\_1\_1\_15.tsv

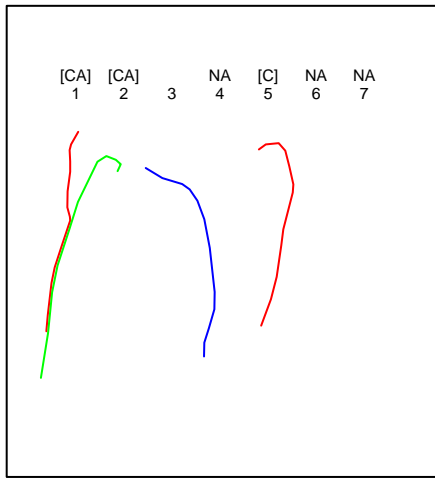

IL1-4-18 REP3 plate B – Experiment REP3  
SiobhanMeasurements/Results\_1\_1\_15.tsv

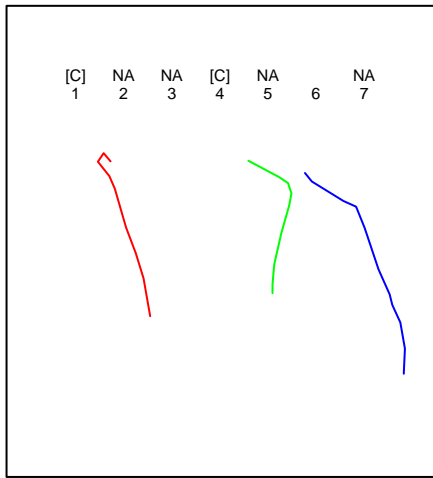

IL1-4-18 REP3 plate C – Experiment REP3  
SiobhanMeasurements/Results\_1\_1\_15.tsv

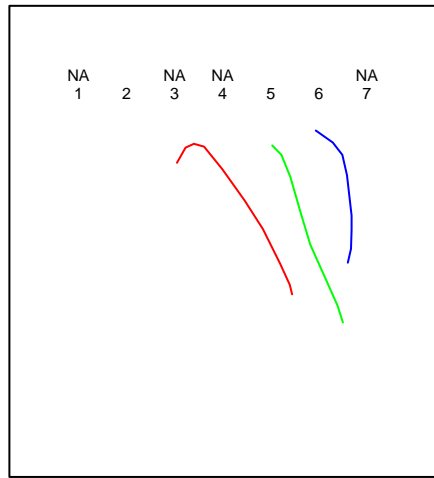

IL1-4-18 REP3 plate D – Experiment REP3  
SiobhanMeasurements/Results\_1\_1\_15.tsv

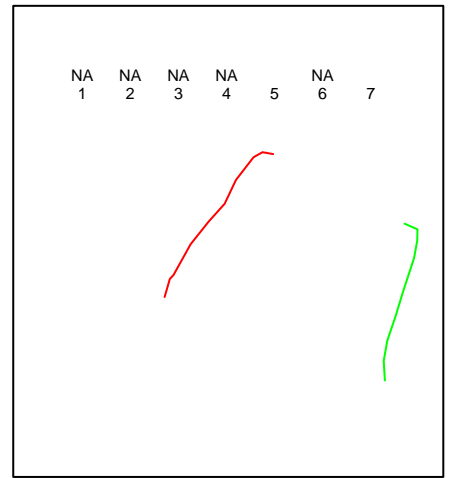

IL1-4-18 REP5 plate A – Experiment REPX1  
SiobhanMeasurements/Results\_1\_1\_15.tsv

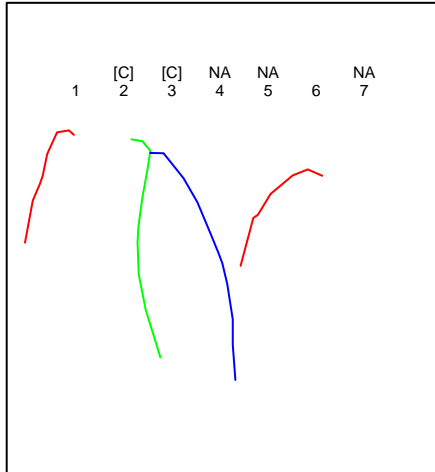

IL1-4-18 REP5 plate B – Experiment REPX1  
SiobhanMeasurements/Results\_1\_1\_15.tsv

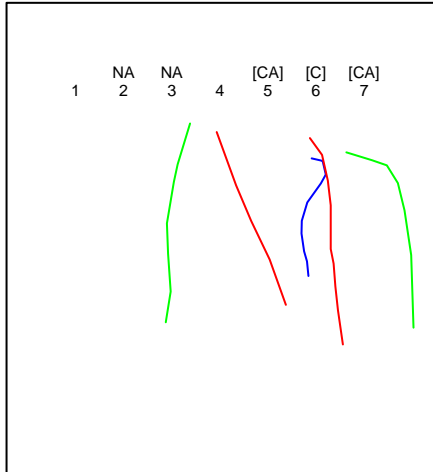

IL1-4-18 REP5 plate C – Experiment REPX1  
SiobhanMeasurements/Results\_1\_1\_15.tsv

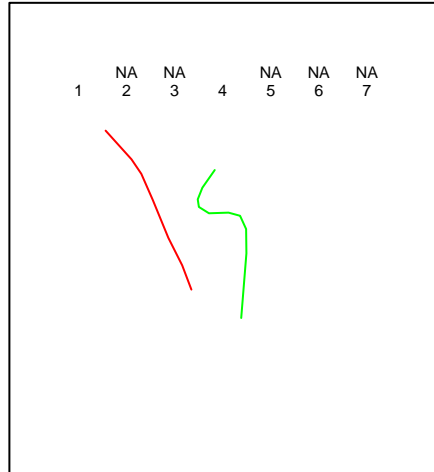

IL1-4-18 REP5 plate D – Experiment REPX1  
SiobhanMeasurements/Results\_1\_1\_15.tsv

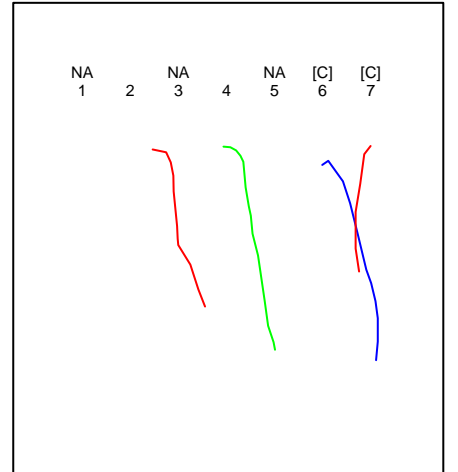

IL2-1 REP2 plate A – Experiment REP2  
SiobhanMeasurements/Results\_1\_1\_15.tsv

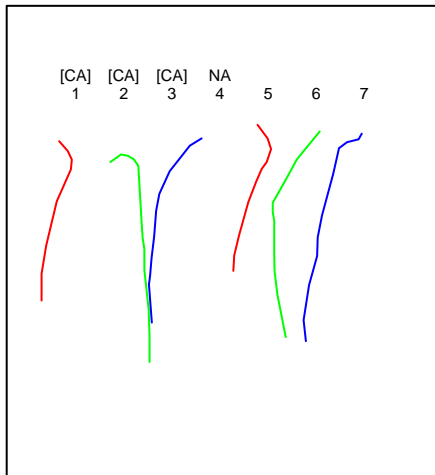

IL2-1 REP2 plate B – Experiment REP2  
SiobhanMeasurements/Results\_1\_1\_15.tsv

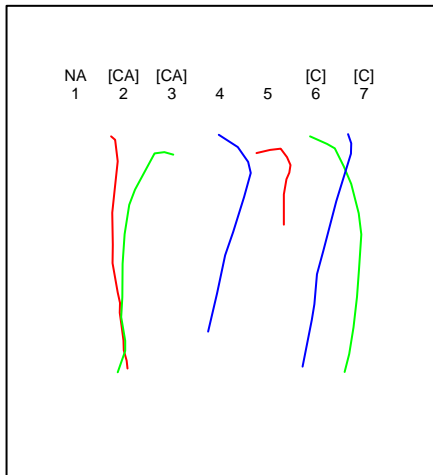

IL2-1 REP3 plate A – Experiment REP3  
SiobhanMeasurements/Results\_1\_1\_15.tsv

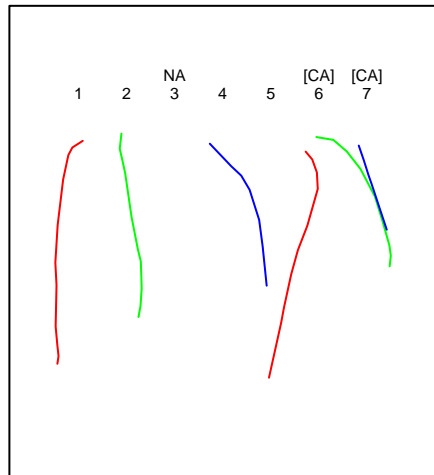

IL2-1 REP3 plate B – Experiment REP3  
SiobhanMeasurements/Results\_1\_1\_15.tsv

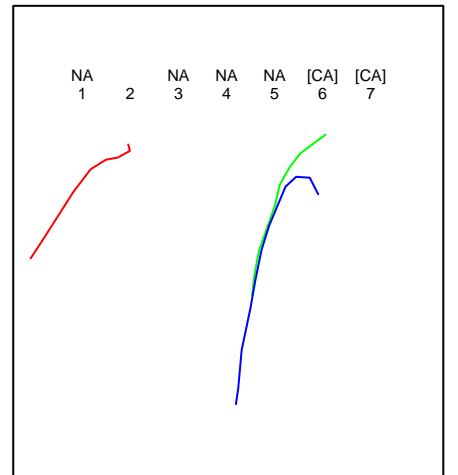

IL2-1-1 REP2 plate A – Experiment REP2  
Livingstone/roots.tsv

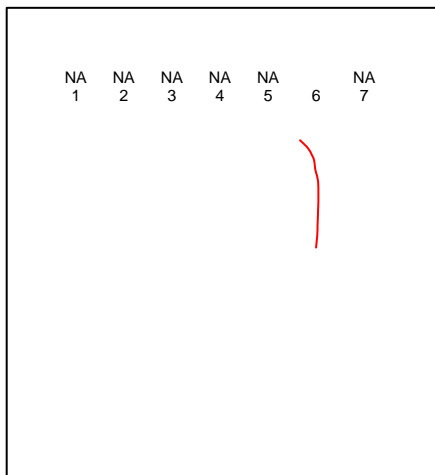

IL2-1-1 REP2 plate B – Experiment REP2  
Livingstone/roots.tsv

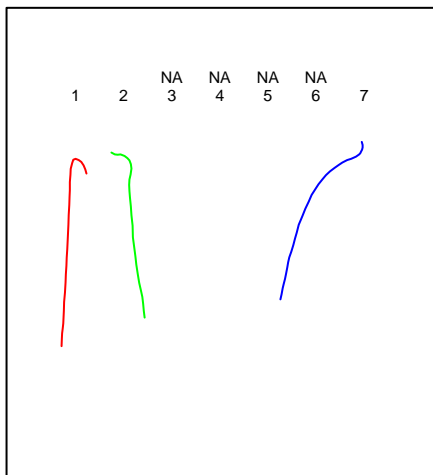

IL2-1-1 REP3 plate A – Experiment REP3  
Livingstone/roots.tsv

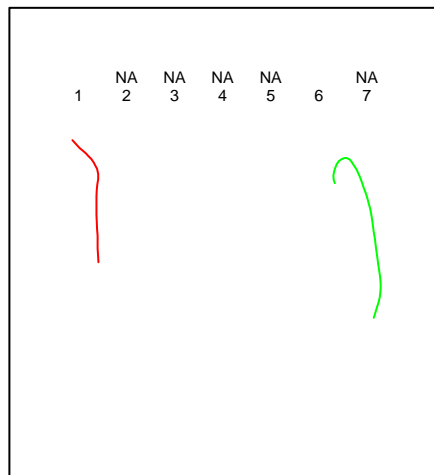

IL2-1-1 REP3 plate B – Experiment REP3  
Livingstone/roots.tsv

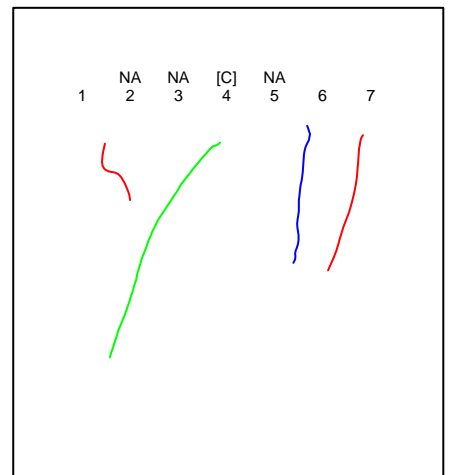

IL2-1-1 REP4 plate A – Experiment REP4  
Livingstone/roots.tsv

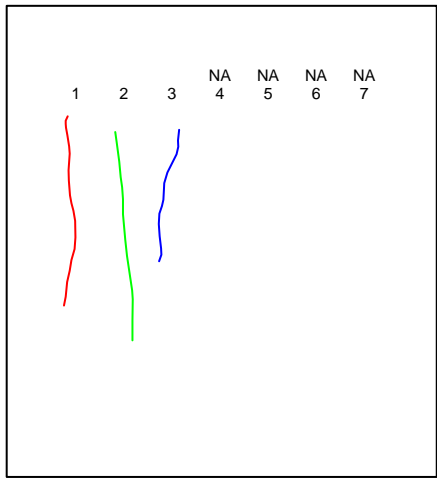

IL2-1-1 REP4 plate B – Experiment REP4  
Livingstone/roots.tsv

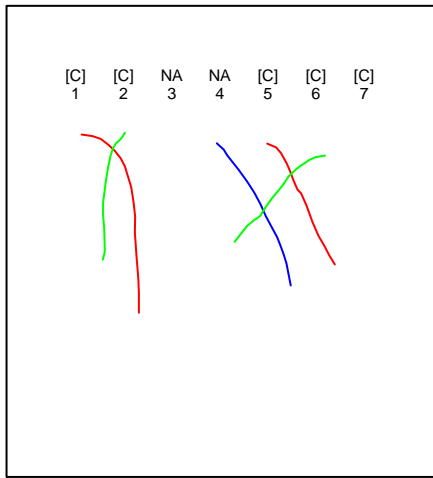

IL2-1-1 REP5 plate A – Experiment REP5  
Livingstone/roots.tsv

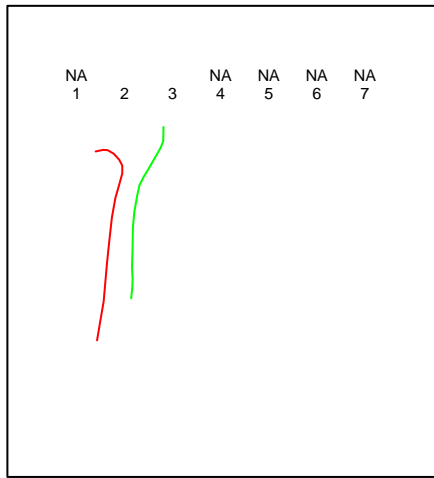

IL2-1-1 REP5 plate B – Experiment REP5  
Livingstone/roots.tsv

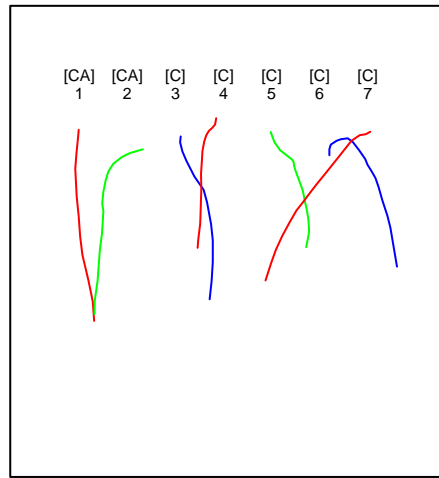

IL2-1-1 REP2 plate A – Experiment REPN2  
SiobhanMeasurements/Results\_01\_15\_15.tsv

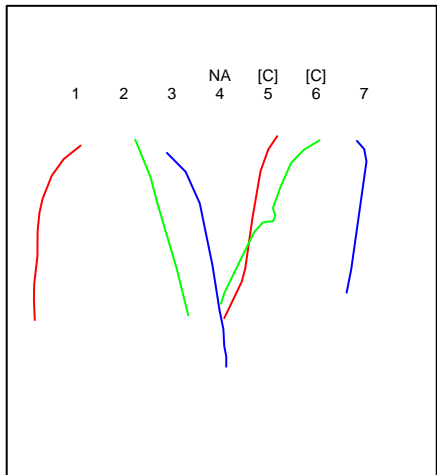

IL2-1-1 REP2 plate B – Experiment REPN2  
SiobhanMeasurements/Results\_01\_15\_15.tsv

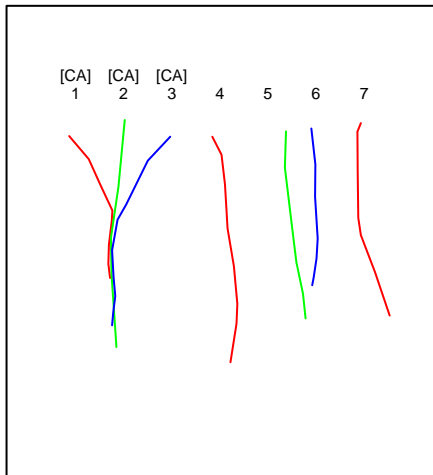

IL2-1-1 REP3 plate A – Experiment REPN3  
SiobhanMeasurements/Results\_01\_15\_15.tsv

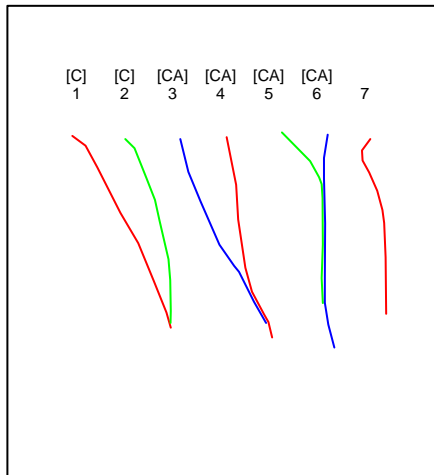

IL2-1-1 REP3 plate B – Experiment REPN3  
SiobhanMeasurements/Results\_01\_15\_15.tsv

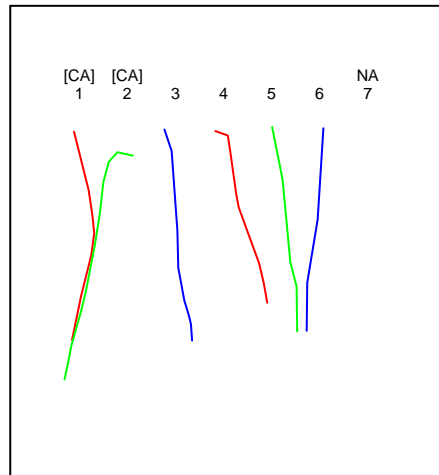

IL2-1-1 REP4 plate A – Experiment REPN4  
SiobhanMeasurements/Results\_01\_15\_15.tsv

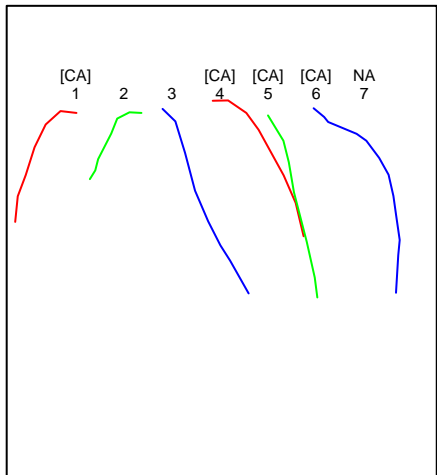

IL2-1-1 REP4 plate B – Experiment REPN4  
SiobhanMeasurements/Results\_01\_15\_15.tsv

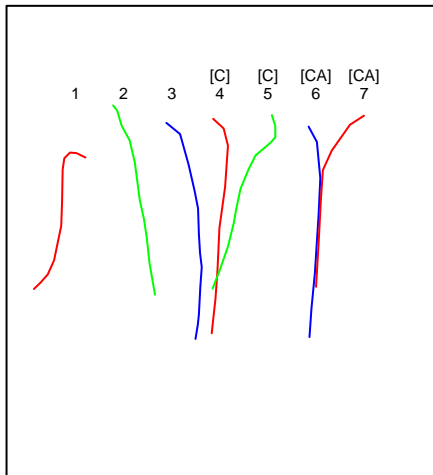

IL2-1-1 REP5 plate A – Experiment REPN5  
SiobhanMeasurements/Results\_01\_15\_15.tsv

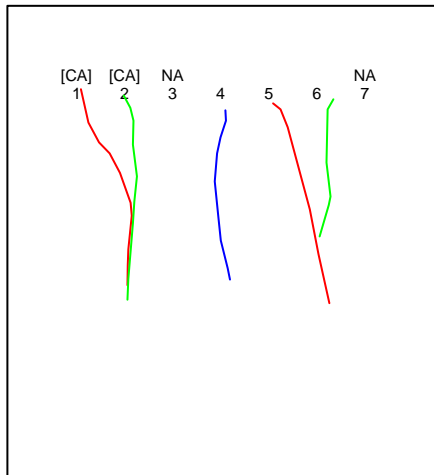

IL2-1-1 REP5 plate B – Experiment REPN5  
SiobhanMeasurements/Results\_01\_15\_15.tsv

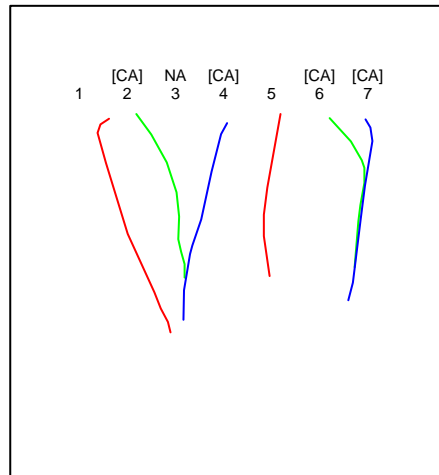

IL2-2 REP2 plate A – Experiment REP2  
Livingstone/roots.tsv

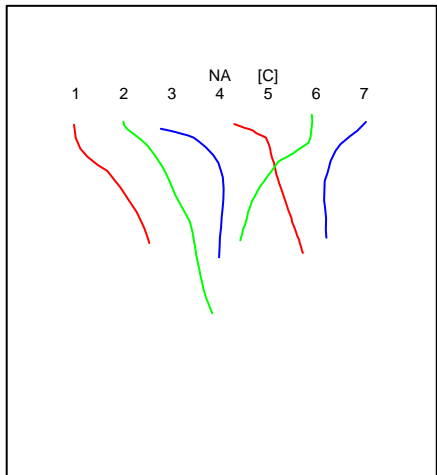

IL2-2 REP3 plate A – Experiment REP3  
Livingstone/roots.tsv

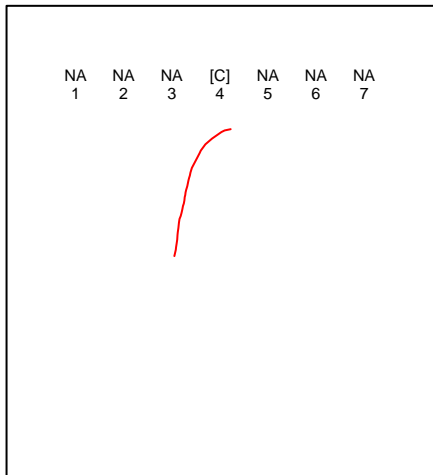

IL2-2 REP3 plate B – Experiment REP3  
Livingstone/roots.tsv

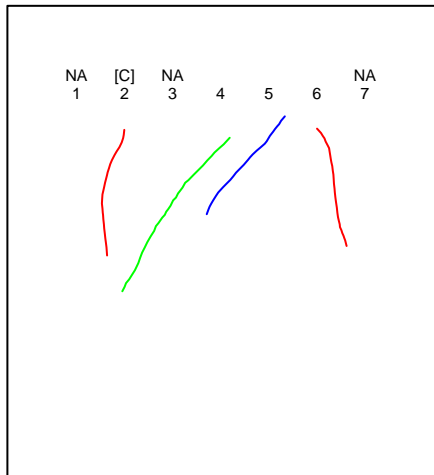

IL2-2 REP4 plate A – Experiment REP4  
Livingstone/roots.tsv

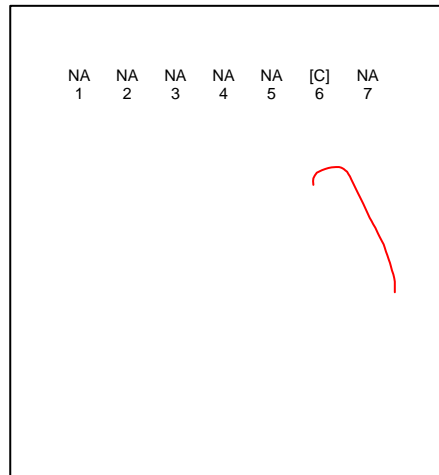

IL2-2 REP4 plate B – Experiment REP4  
Livingstone/roots.tsv

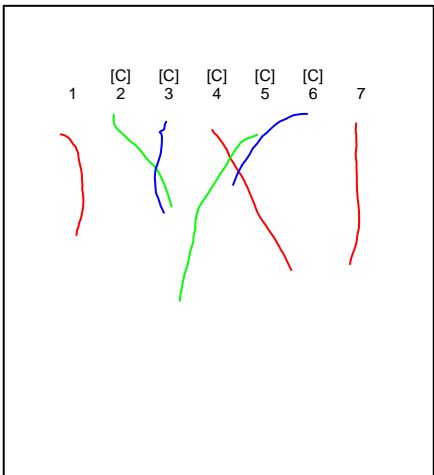

IL2-2 REP5 plate A – Experiment REP5  
Livingstone/roots.tsv

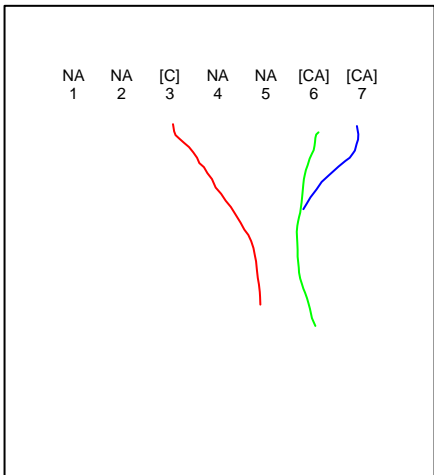

IL2-2 REP5 plate B – Experiment REP5  
Livingstone/roots.tsv

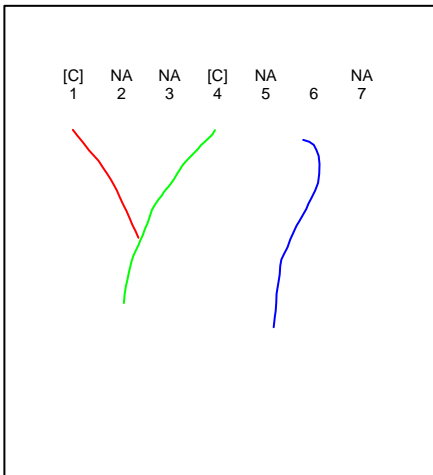

IL2-3 REP2 plate A – Experiment REP2  
Livingstone/roots.tsv

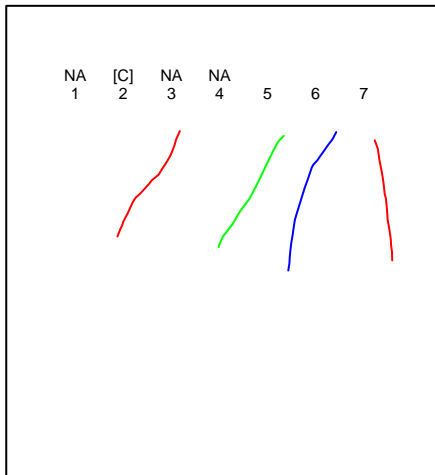

IL2-3 REP2 plate B – Experiment REP2  
Livingstone/roots.tsv

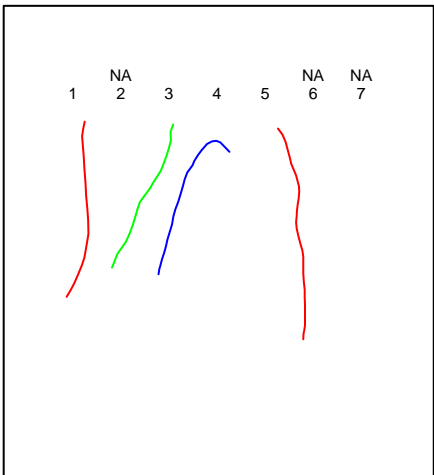

IL2-3 REP3 plate A – Experiment REP3  
Livingstone/roots.tsv

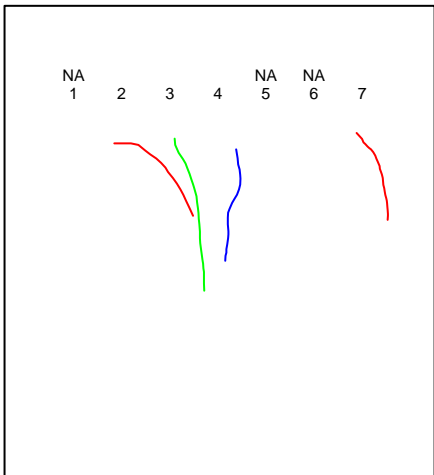

IL2-3 REP3 plate B – Experiment REP3  
Livingstone/roots.tsv

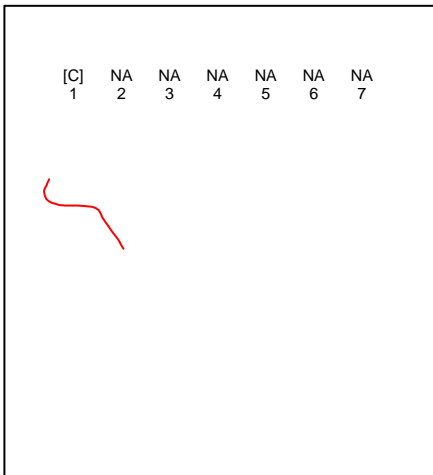

IL2-3 REP4 plate A – Experiment REP4  
Livingstone/roots.tsv

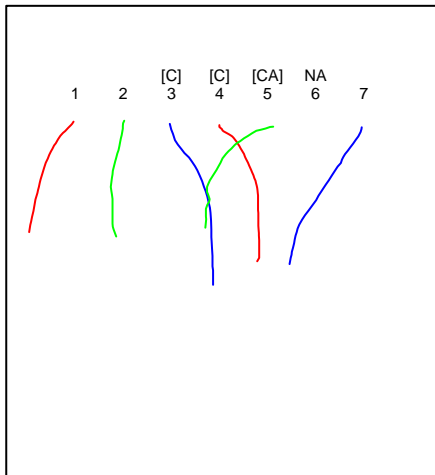

IL2-3 REP4 plate B – Experiment REP4  
Livingstone/roots.tsv

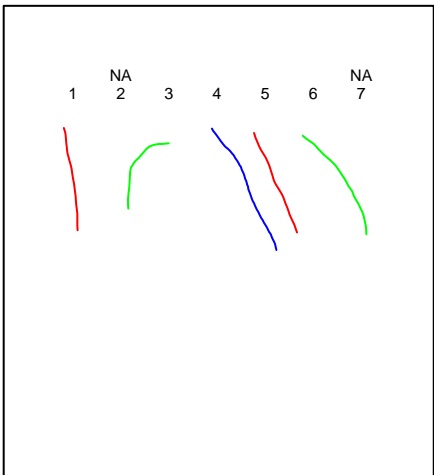

IL2-3 REP5 plate A – Experiment REP5  
Livingstone/roots.tsv

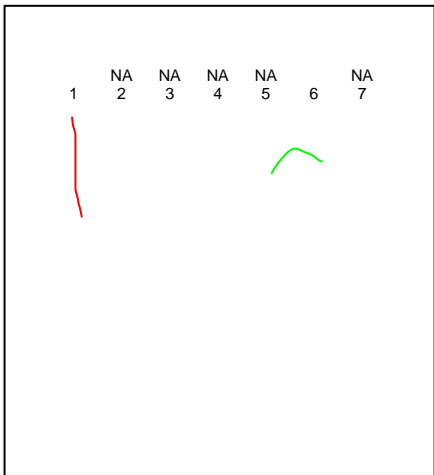

IL2-3 REP5 plate B – Experiment REP5  
Livingstone/roots.tsv

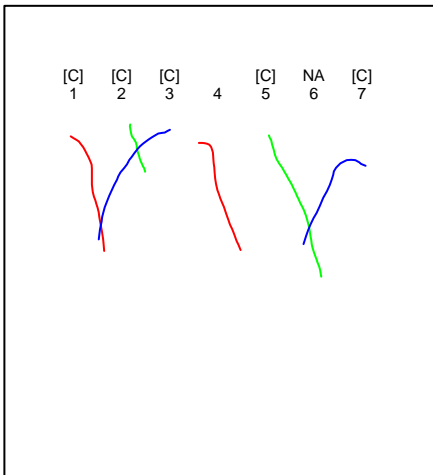

IL2-4 REP2 plate A – Experiment REP2  
SiobhanMeasurements/Results\_12\_29\_14.tsv

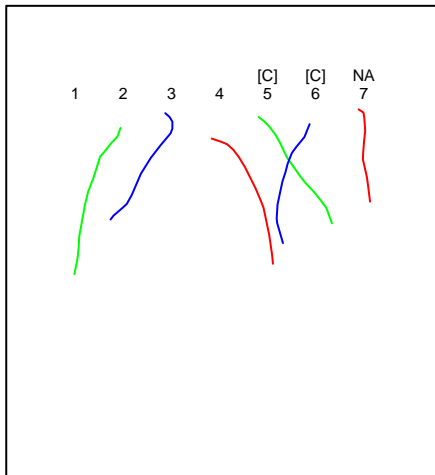

IL2-4 REP2 plate B – Experiment REP2  
SiobhanMeasurements/Results\_12\_29\_14.tsv

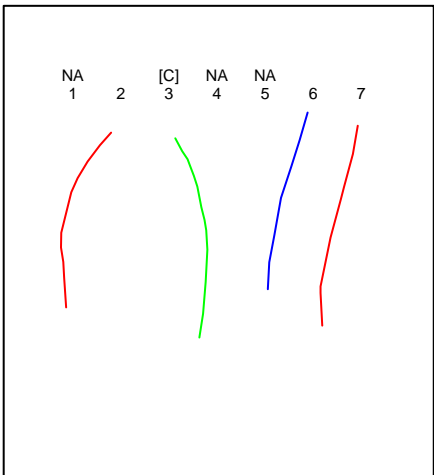

IL2-4 REP3 plate A – Experiment REP3  
SiobhanMeasurements/Results\_12\_29\_14.tsv

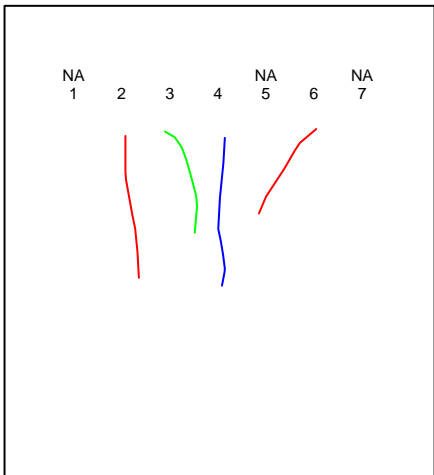

IL2-4 REP3 plate B – Experiment REP3  
SiobhanMeasurements/Results\_12\_29\_14.tsv

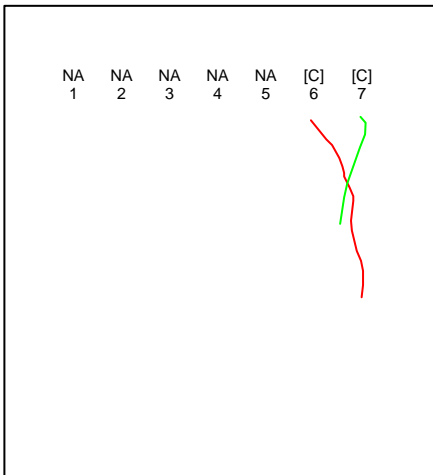

IL2-4 REP4 plate A – Experiment REP4  
SiobhanMeasurements/Results\_12\_29\_14.tsv

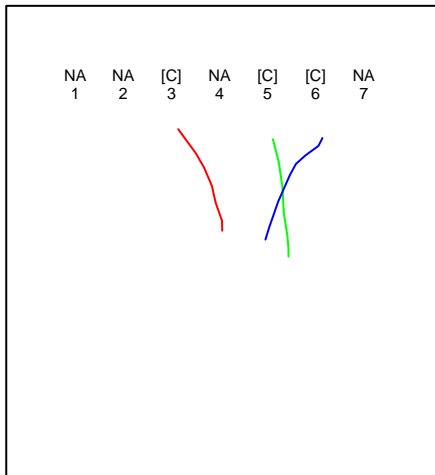

IL2-4 REP4 plate B – Experiment REP4  
SiobhanMeasurements/Results\_12\_29\_14.tsv

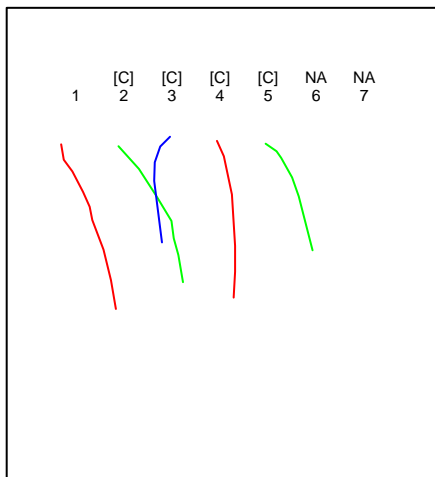

IL2-4 REP5 plate A – Experiment REP5  
SiobhanMeasurements/Results\_12\_29\_14.tsv

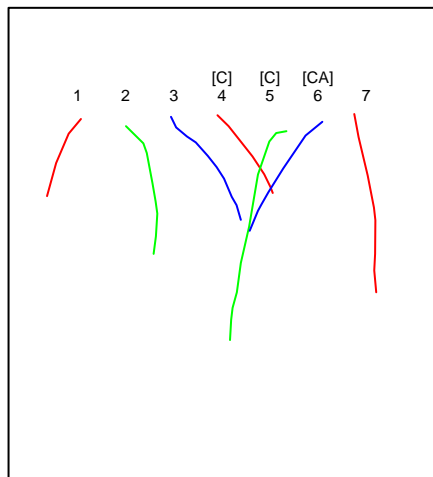

IL2-4 REP5 plate B – Experiment REP5  
SiobhanMeasurements/Results\_12\_29\_14.tsv

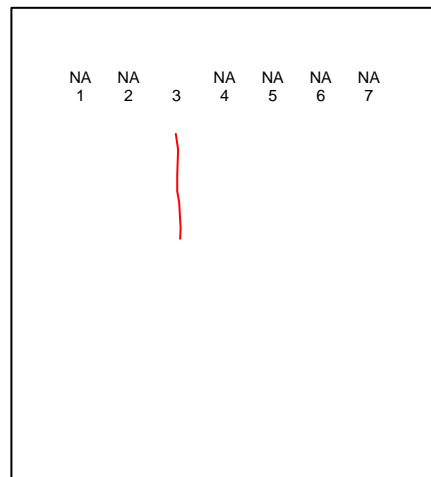

IL2-5 REP2 plate A – Experiment REP2  
SiobhanMeasurements/Results\_01\_15\_15.tsv

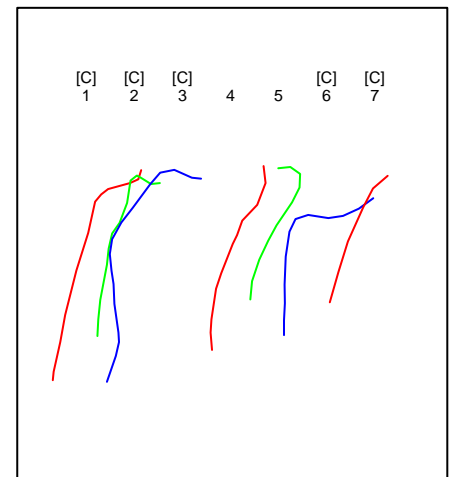

IL2-5 REP2 plate B – Experiment REP2  
SiobhanMeasurements/Results\_01\_15\_15.tsv

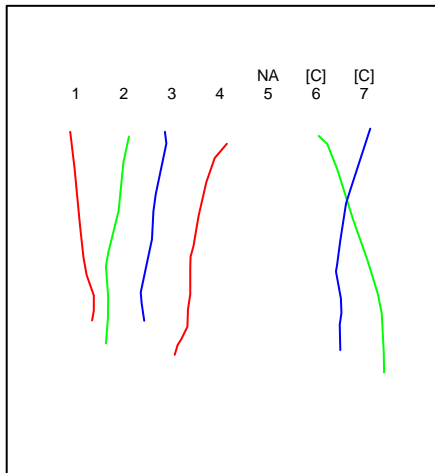

IL2-5 REP3 plate A – Experiment REP3  
SiobhanMeasurements/Results\_01\_15\_15.tsv

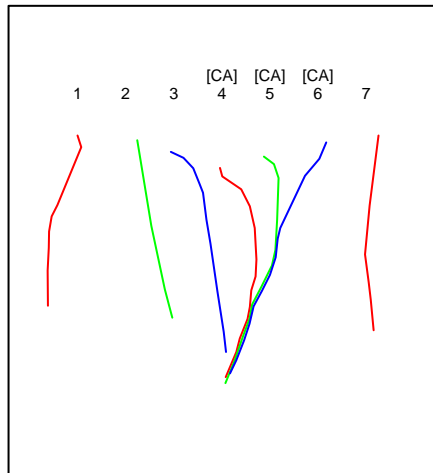

IL2-5 REP3 plate B – Experiment REP3  
SiobhanMeasurements/Results\_01\_15\_15.tsv

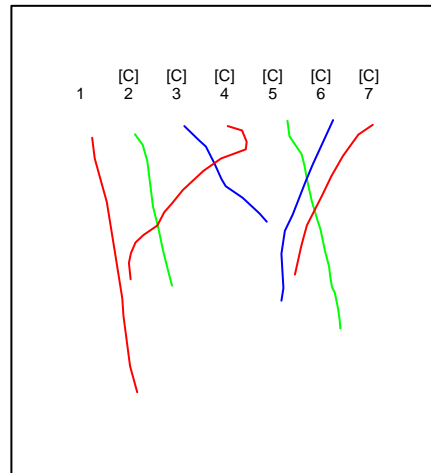

IL2-5 REP4 plate A – Experiment REP4  
SiobhanMeasurements/Results\_01\_15\_15.tsv

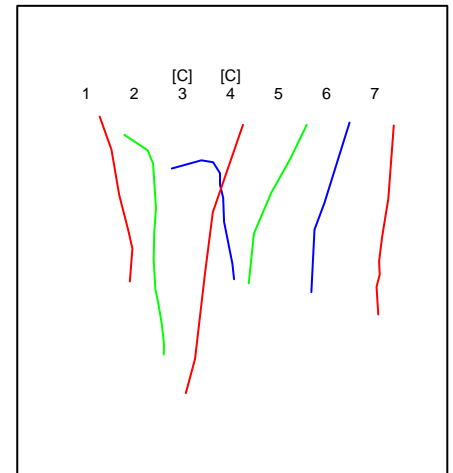

IL2-5 REP4 plate B – Experiment REP4  
SiobhanMeasurements/Results\_01\_15\_15.tsv

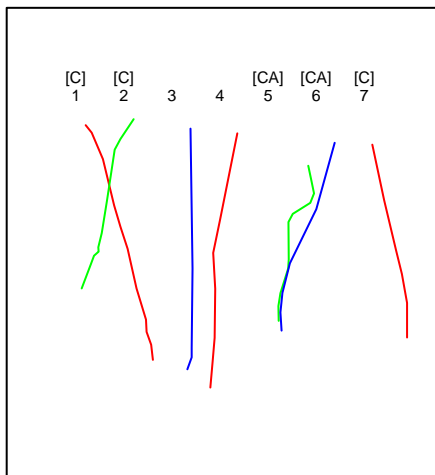

IL2-5 REP5 plate A – Experiment REP5  
SiobhanMeasurements/Results\_01\_15\_15.tsv

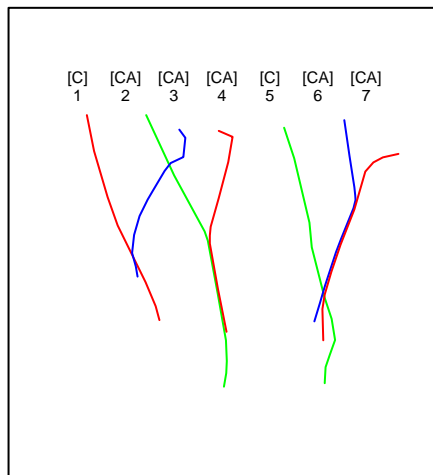

IL2-5 REP5 plate B – Experiment REP5  
SiobhanMeasurements/Results\_01\_15\_15.tsv

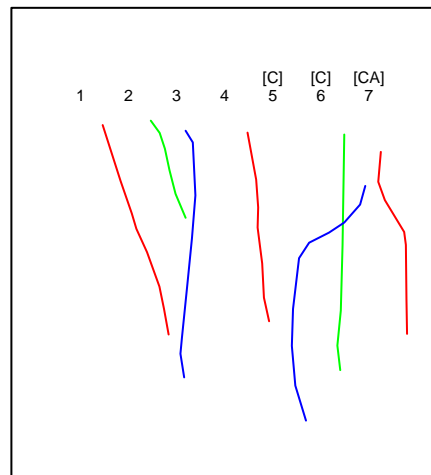

IL2-6 REP2 plate A – Experiment REP2  
Livingstone/roots.tsv

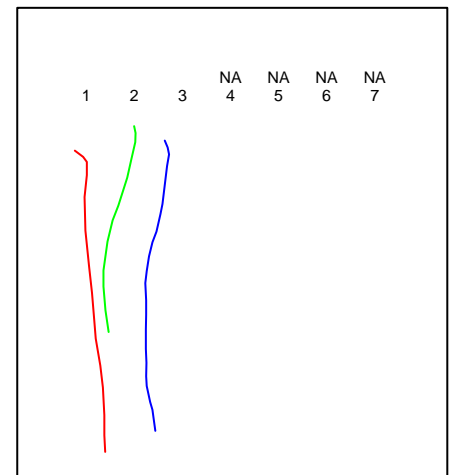

IL2-6 REP2 plate B – Experiment REP2  
Livingstone/roots.tsv

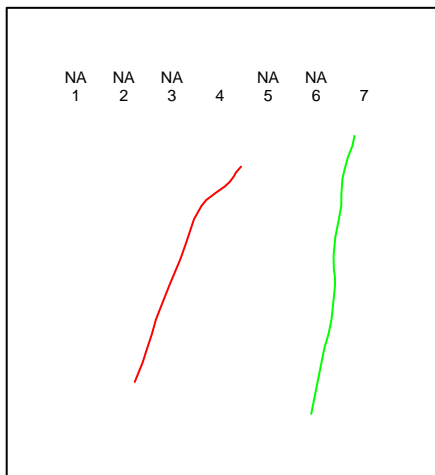

IL2-6 REP3 plate A – Experiment REP3  
Livingstone/roots.tsv

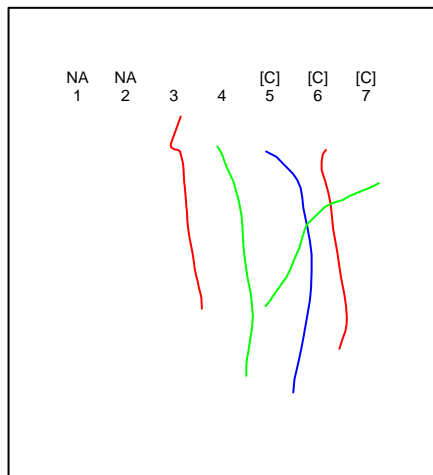

IL2-6 REP3 plate B – Experiment REP3  
Livingstone/roots.tsv

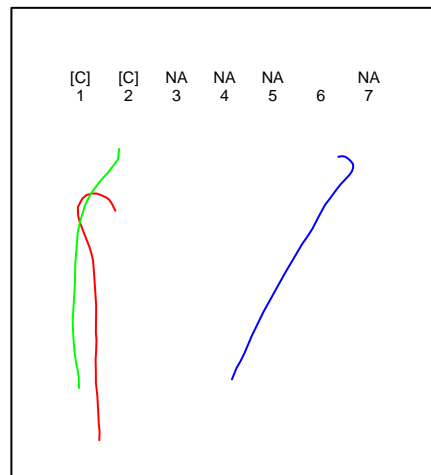

IL2-6 REP4 plate A – Experiment REP4  
Livingstone/roots.tsv

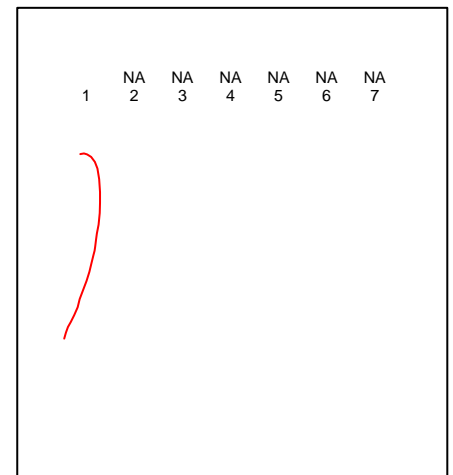

IL2-6 REP4 plate B – Experiment REP4  
Livingstone/roots.tsv

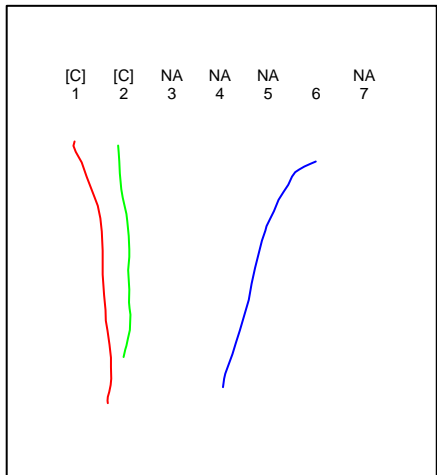

IL2-6 REP5 plate B – Experiment REP5  
Livingstone/roots.tsv

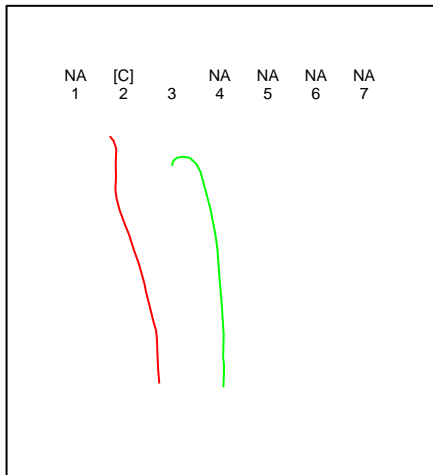

IL2-6 REP5 plate A – Experiment REPX1  
SiobhanMeasurements/Results\_1\_1\_15.tsv

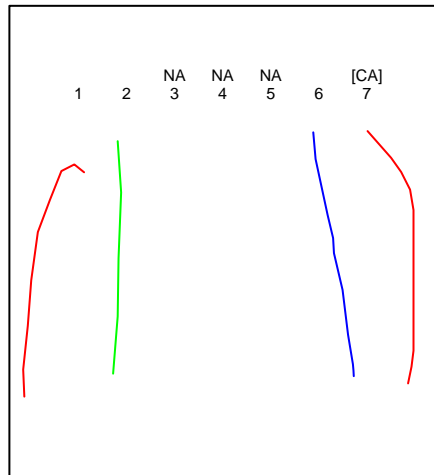

IL2-6 REP5 plate B – Experiment REPX1  
SiobhanMeasurements/Results\_1\_1\_15.tsv

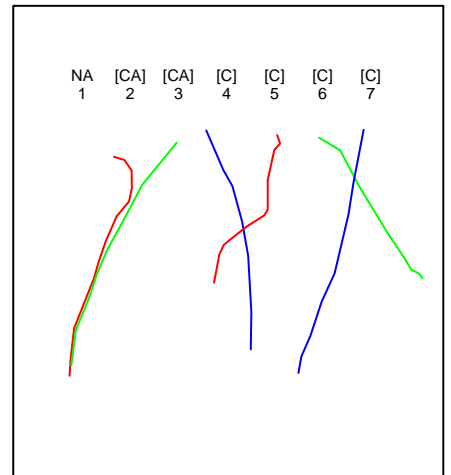

IL2-6 REP5 plate C – Experiment REPX1  
SiobhanMeasurements/Results\_1\_1\_15.tsv

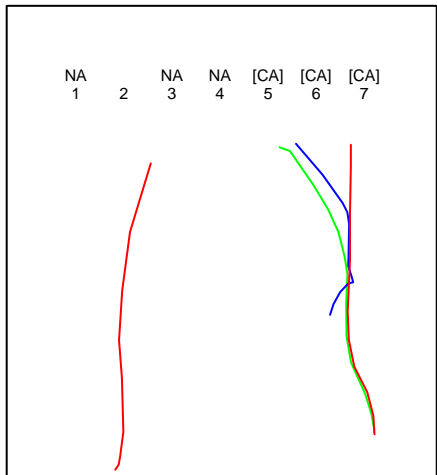

IL2-6-5 REP2 plate A – Experiment REP2  
SiobhanMeasurements/Results\_1\_1\_15.tsv

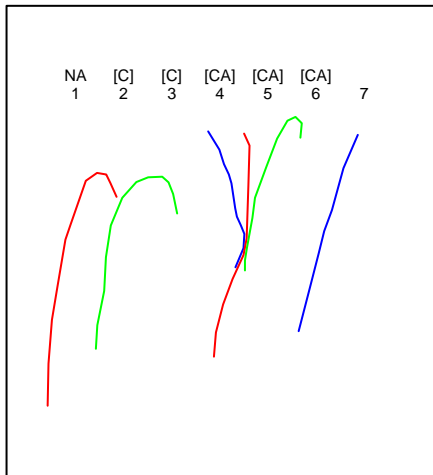

IL2-6-5 REP2 plate B – Experiment REP2  
SiobhanMeasurements/Results\_1\_1\_15.tsv

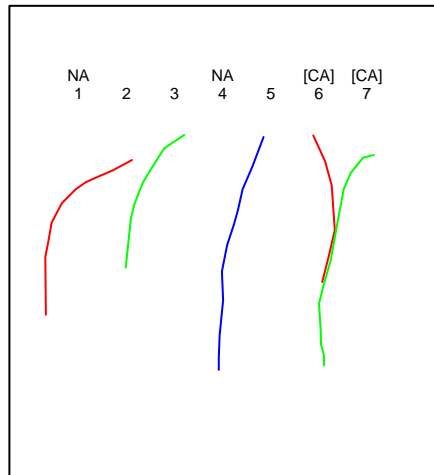

IL2-6-5 REP3 plate A – Experiment REP3  
SiobhanMeasurements/Results\_1\_1\_15.tsv

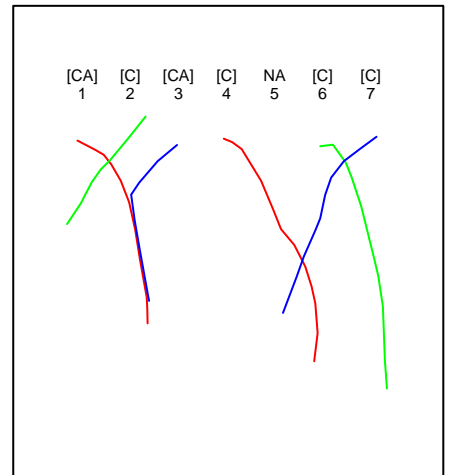

IL2-6-5 REP3 plate B – Experiment REP3  
SiobhanMeasurements/Results\_1\_1\_15.tsv

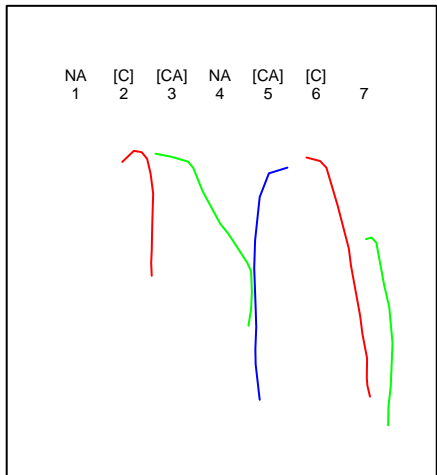

IL2-6-5 REP4 plate A – Experiment REP4  
SiobhanMeasurements/Results\_1\_1\_15.tsv

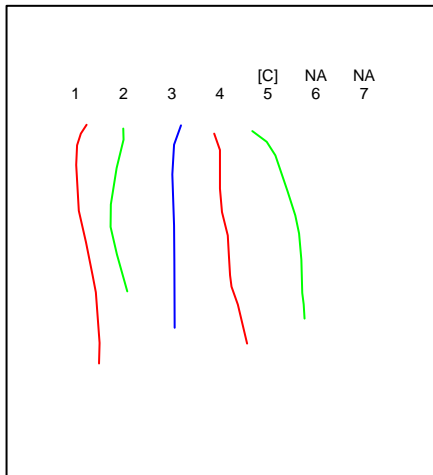

IL2-6-5 REP4 plate B – Experiment REP4  
SiobhanMeasurements/Results\_1\_1\_15.tsv

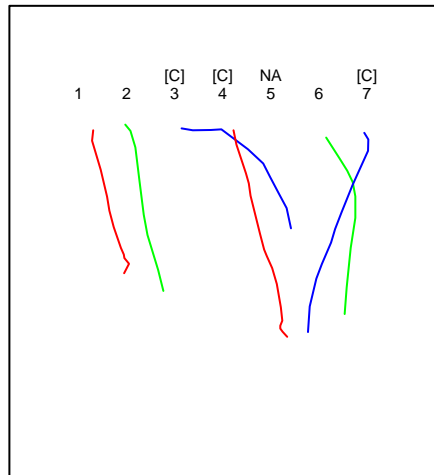

IL2-6-5 REP5 plate A – Experiment REP5  
SiobhanMeasurements/Results\_1\_1\_15.tsv

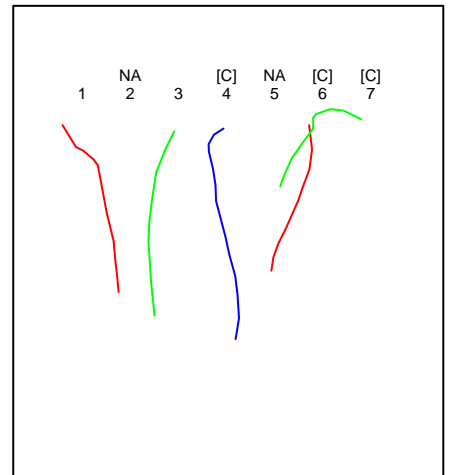

IL2-6-5 REP5 plate B – Experiment REP5  
SiobhanMeasurements/Results\_1\_1\_15.tsv

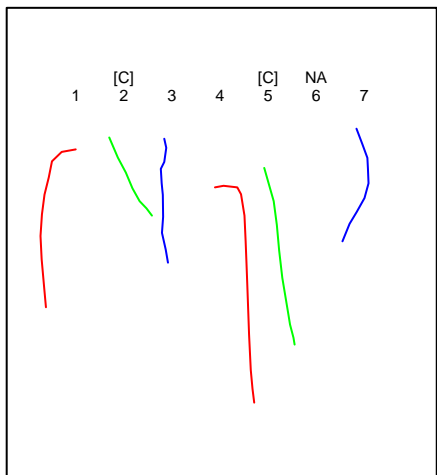

IL3-1 REP2 plate B – Experiment REP2  
Livingstone/roots.tsv

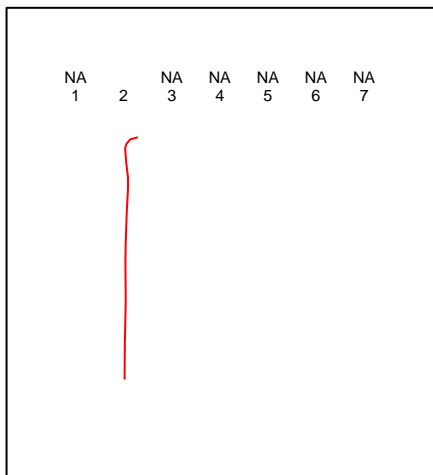

IL3-1 REP3 plate A – Experiment REP3  
Livingstone/roots.tsv

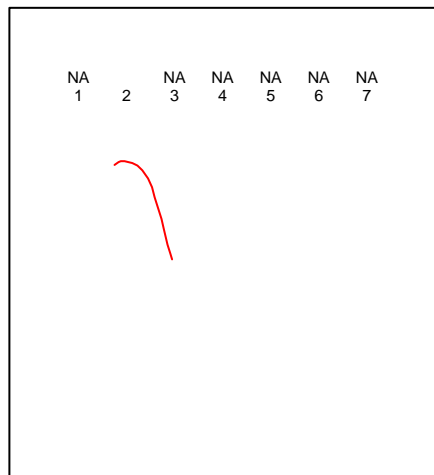

IL3-1 REP3 plate B – Experiment REP3  
Livingstone/roots.tsv

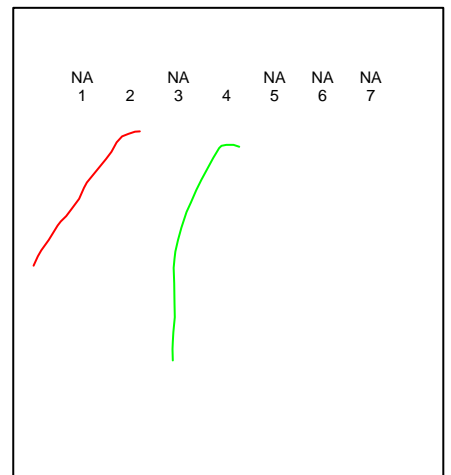

IL3-1 REP3 plate C – Experiment REP3  
Livingstone/roots.tsv

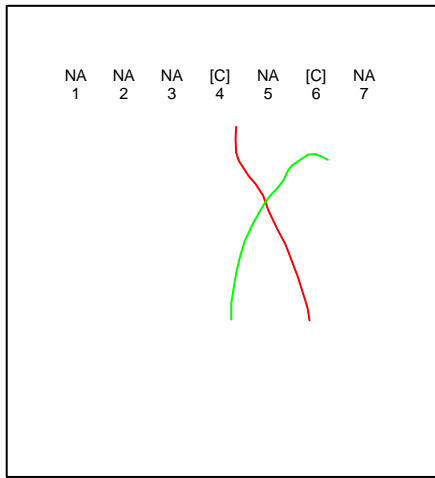

IL3-1 REP3 plate D – Experiment REP3  
Livingstone/roots.tsv

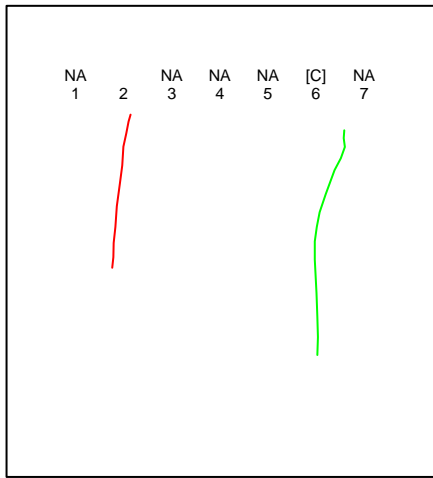

IL3-1 REP4 plate A – Experiment REP4  
Livingstone/roots.tsv

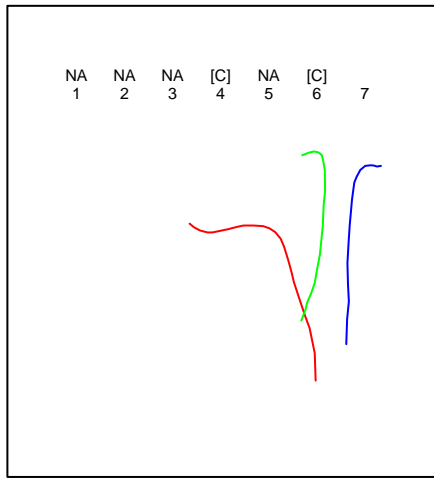

IL3-1 REP4 plate B – Experiment REP4  
Livingstone/roots.tsv

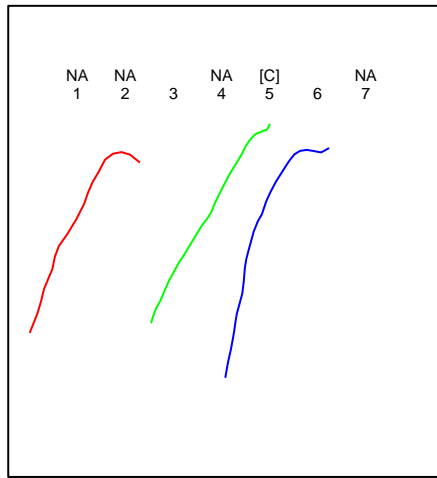

IL3-1 REP4 plate C – Experiment REP4  
Livingstone/roots.tsv

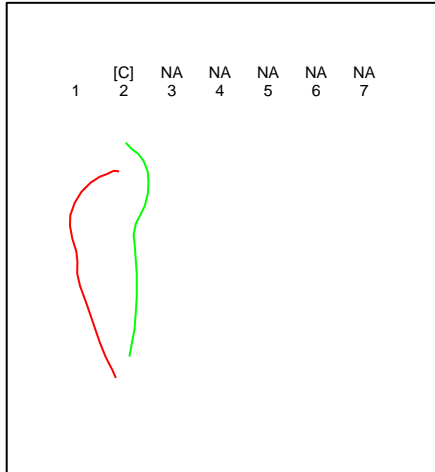

IL3-1 REP5 plate A – Experiment REP5  
Livingstone/roots.tsv

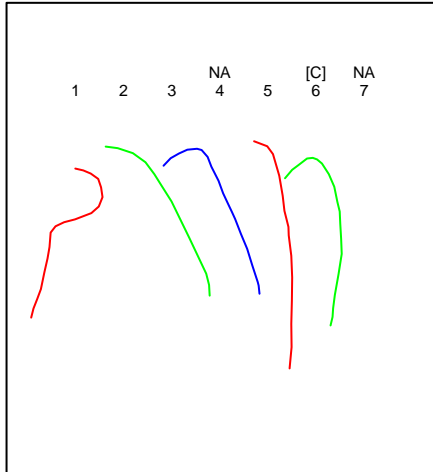

IL3-1 REP5 plate B – Experiment REP5  
Livingstone/roots.tsv

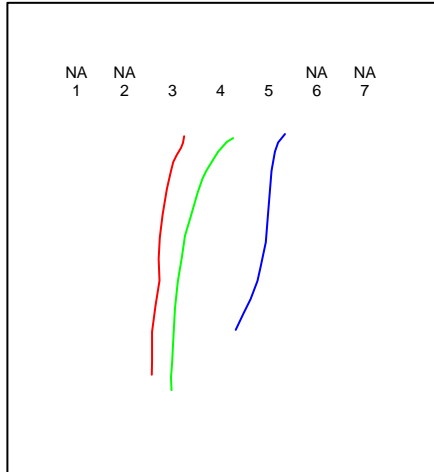

IL3-1 REP5 plate C – Experiment REP5  
Livingstone/roots.tsv

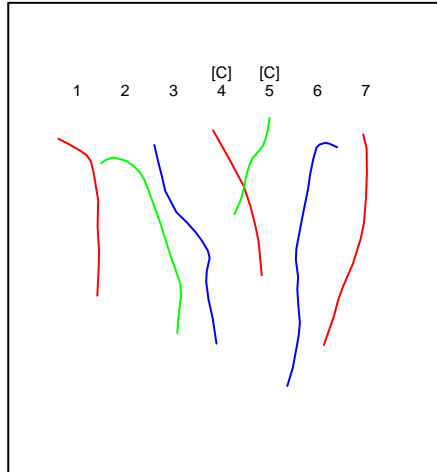

IL3-1 REP2 plate D – Experiment REPX1  
SiobhanMeasurements/Results\_01\_15\_15.tsv

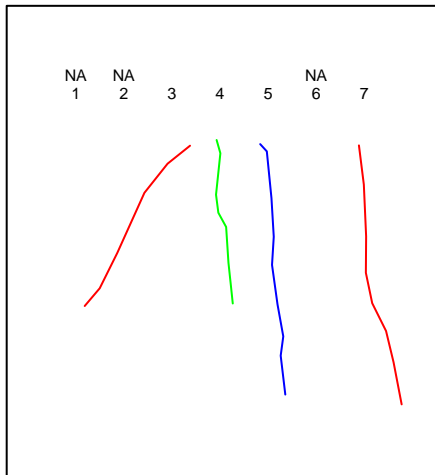

IL3-2 REP2 plate A – Experiment REP2  
SiobhanMeasurements/Siobhan\_Results\_11\_27.tsv

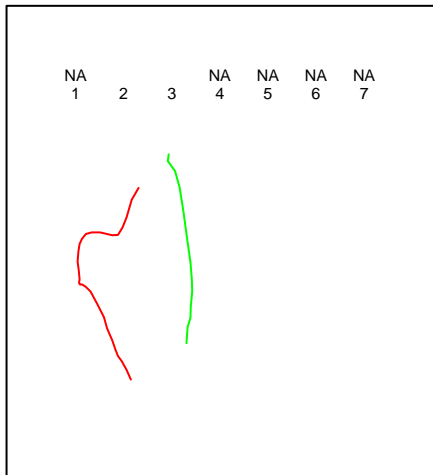

IL3-2 REP2 plate B – Experiment REP2  
SiobhanMeasurements/Siobhan\_Results\_11\_27.tsv

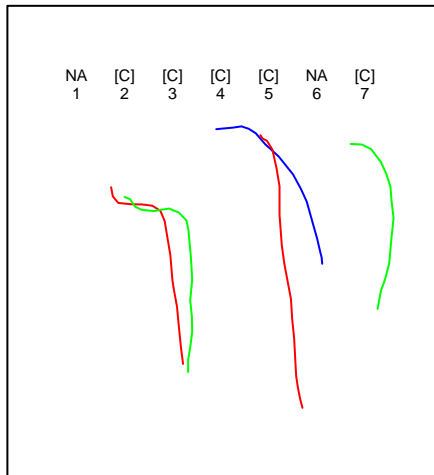

IL3-2 REP3 plate A – Experiment REP3  
SiobhanMeasurements/Siobhan\_Results\_11\_27.tsv

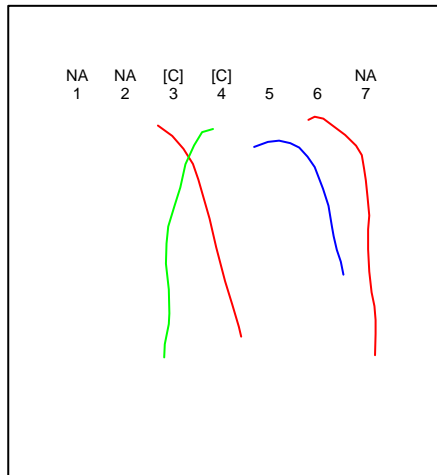

IL3-2 REP3 plate B - Experiment REP3  
SiobhanMeasurements/Siobhan\_Results\_11\_27.tsv

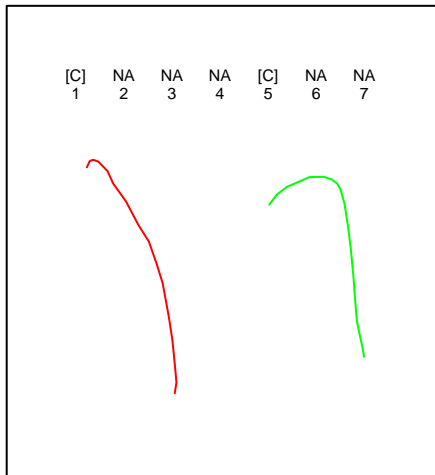

IL3-2 REP4 plate A – Experiment REP4  
SiobhanMeasurements/Siobhan\_Results\_11\_27.tsv

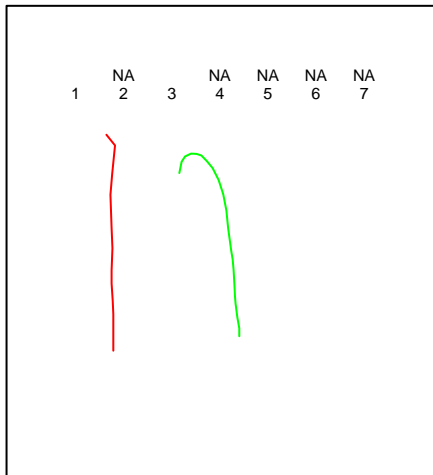

IL3-2 REP4 plate B – Experiment REP4  
SiobhanMeasurements/Siobhan\_Results\_11\_27.tsv

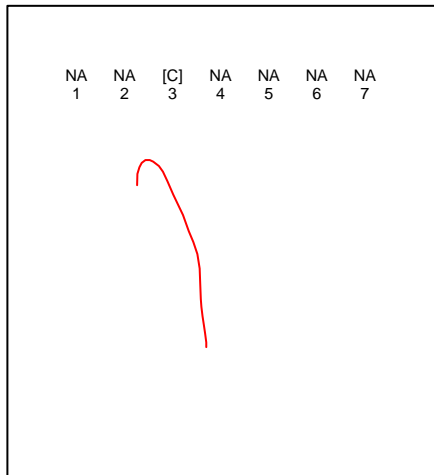

IL3-2 REP5 plate A – Experiment REP5  
SiobhanMeasurements/Siobhan\_Results\_11\_27.tsv

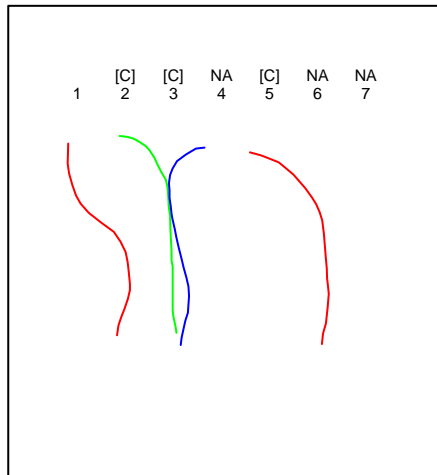

IL3-2 REP5 plate B – Experiment REP5  
SiobhanMeasurements/Siobhan\_Results\_11\_27.tsv

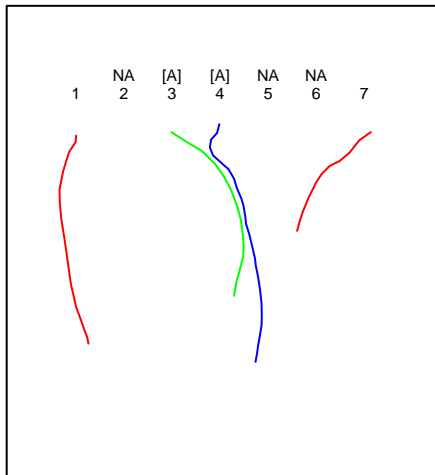

IL3-3 REP2 plate A – Experiment REP2  
Livingstone/roots.tsv

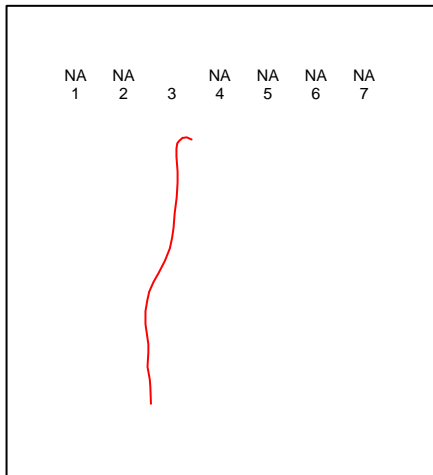

IL3-3 REP2 plate B – Experiment REP2  
Livingstone/roots.tsv

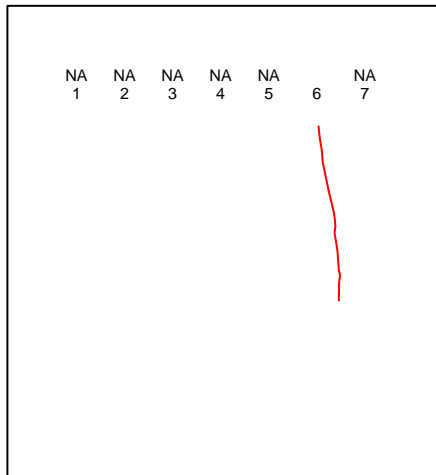

IL3-4 REP2 plate A – Experiment REP2  
SiobhanMeasurements/Siobhan\_Results\_11\_30.tsv

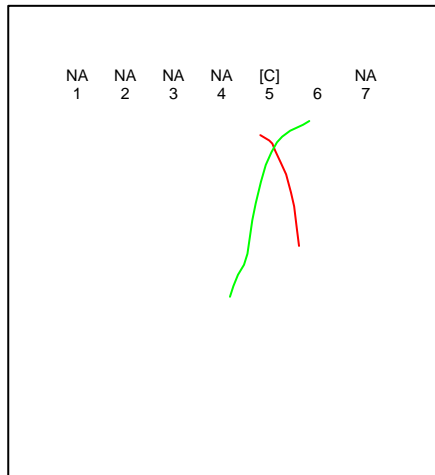

IL3-4 REP2 plate B – Experiment REP2  
SiobhanMeasurements/Siobhan\_Results\_11\_30.tsv

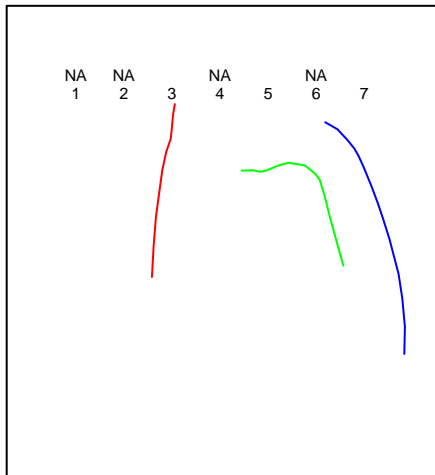

IL3-4 REP3 plate A – Experiment REP3  
SiobhanMeasurements/Siobhan\_Results\_11\_30.tsv

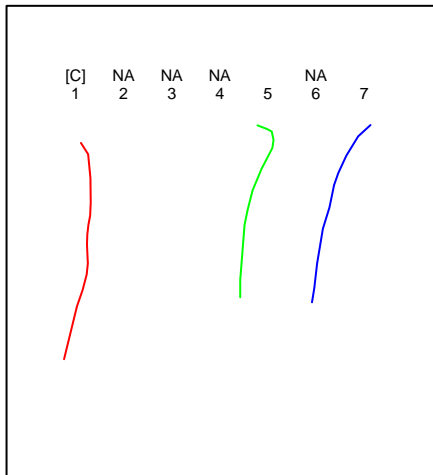

IL3-4 REP3 plate B – Experiment REP3  
SiobhanMeasurements/Siobhan\_Results\_11\_30.tsv

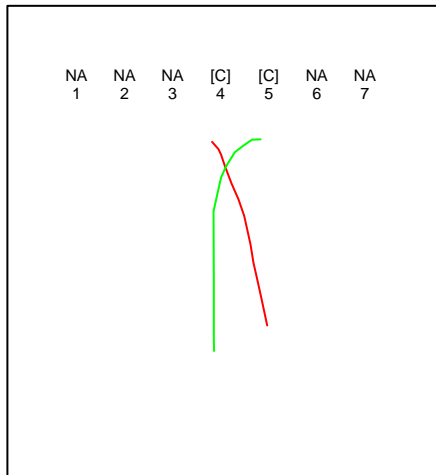

IL3-4 REP4 plate A – Experiment REP4  
SiobhanMeasurements/Siobhan\_Results\_11\_30.tsv

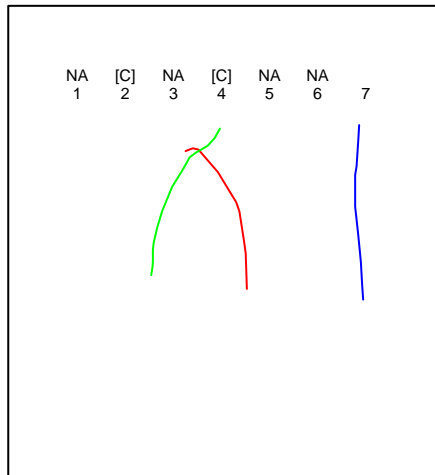

IL3-4 REP4 plate B – Experiment REP4  
SiobhanMeasurements/Siobhan\_Results\_11\_30.tsv

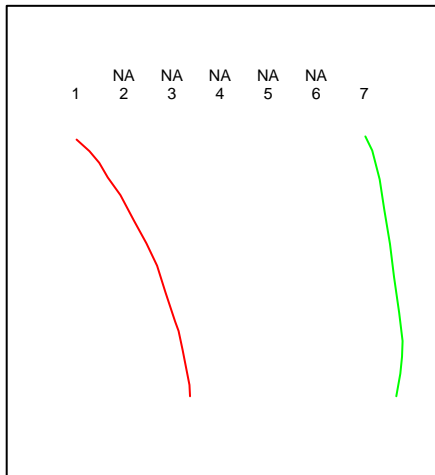

IL3-4 REP5 plate A – Experiment REP5  
SiobhanMeasurements/Siobhan\_Results\_11\_30.tsv

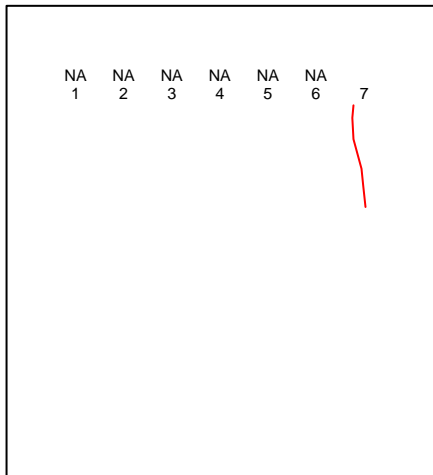

IL3-4 REP5 plate B – Experiment REP5  
SiobhanMeasurements/Siobhan\_Results\_11\_30.tsv

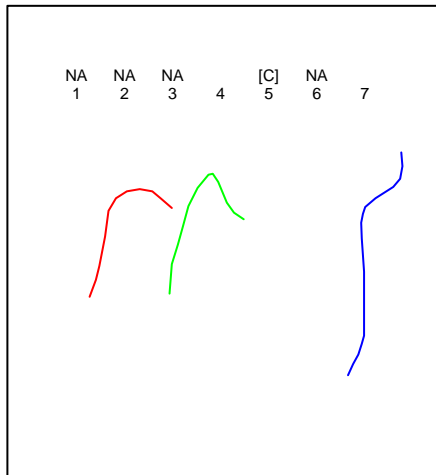

IL3-4 REP5 plate A – Experiment REPX1  
SiobhanMeasurements/Siobhan\_Results\_11\_30.tsv

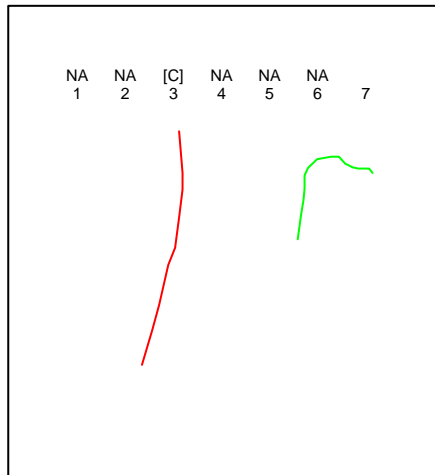

IL3-4 REP5 plate B – Experiment REPX1  
SiobhanMeasurements/Siobhan\_Results\_11\_30.tsv

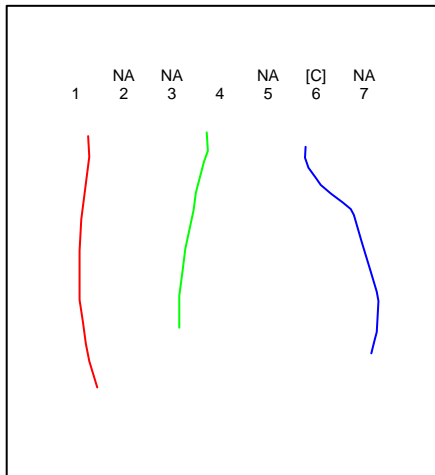

IL3-4 UNKN plate A – Experiment REPX2  
SiobhanMeasurements/Siobhan\_Results\_11\_30.tsv

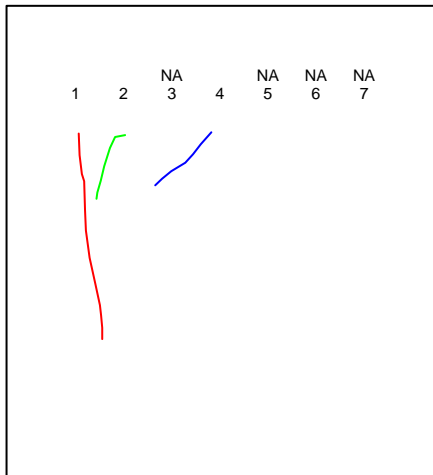

IL3-4 UNKN plate B – Experiment REPX2  
SiobhanMeasurements/Siobhan\_Results\_11\_30.tsv

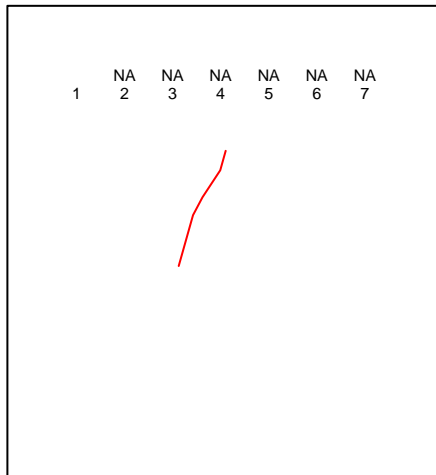

IL3-4 UNKN plate C – Experiment REPX2  
SiobhanMeasurements/Siobhan\_Results\_11\_30.tsv

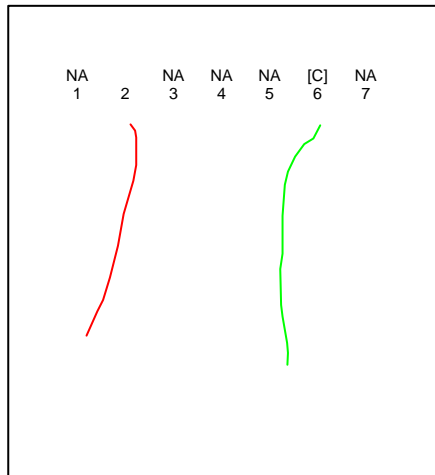

IL3-5 REP2 plate A – Experiment REPN2  
SiobhanMeasurements/Results\_01\_15\_15.tsv

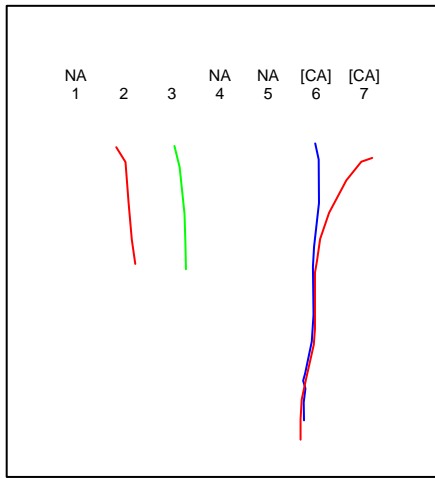

IL3-5 REP2 plate B – Experiment REPN2  
SiobhanMeasurements/Results\_01\_15\_15.tsv

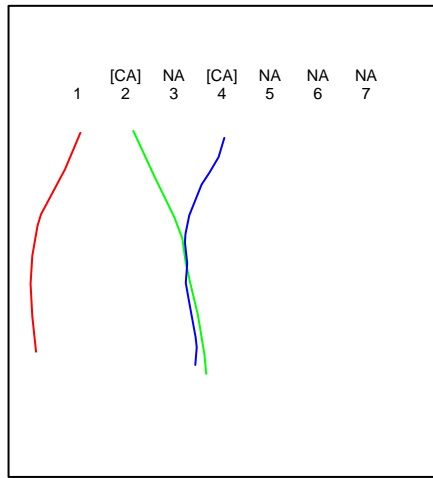

IL3-5 REP3 plate A – Experiment REPN3  
SiobhanMeasurements/Results\_01\_15\_15.tsv

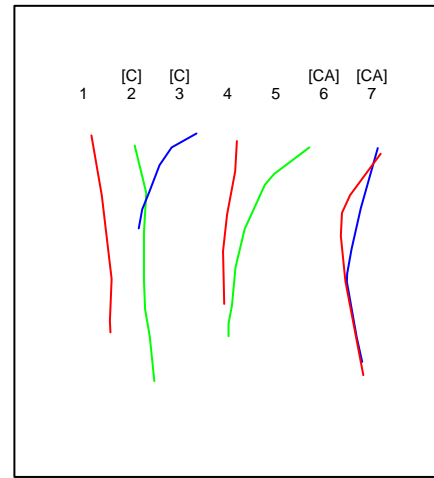

IL3-5 REP3 plate B – Experiment REPN3  
SiobhanMeasurements/Results\_01\_15\_15.tsv

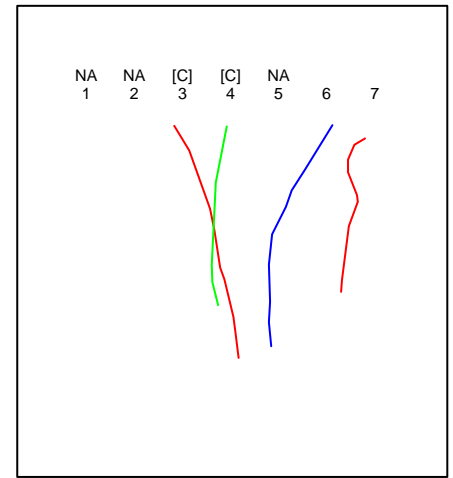

IL3-5 REP4 plate A – Experiment REPN4  
SiobhanMeasurements/Results\_01\_15\_15.tsv

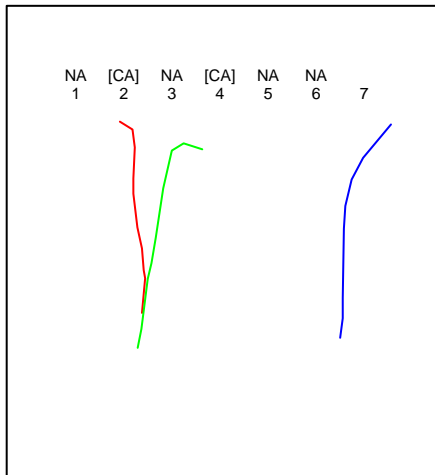

IL3-5 REP4 plate B – Experiment REPN4  
SiobhanMeasurements/Results\_01\_15\_15.tsv

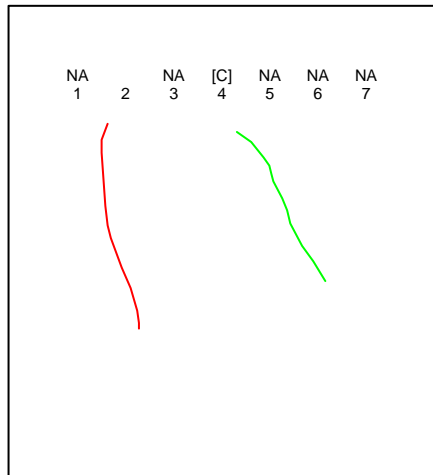

IL3-5 REP5 plate A – Experiment REPN5  
SiobhanMeasurements/Results\_01\_15\_15.tsv

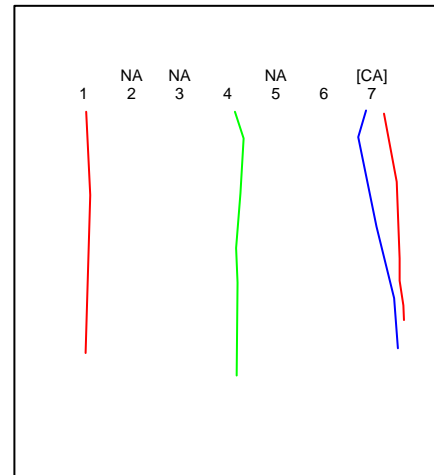

IL3-5 REP5 plate B – Experiment REPN5  
SiobhanMeasurements/Results\_01\_15\_15.tsv

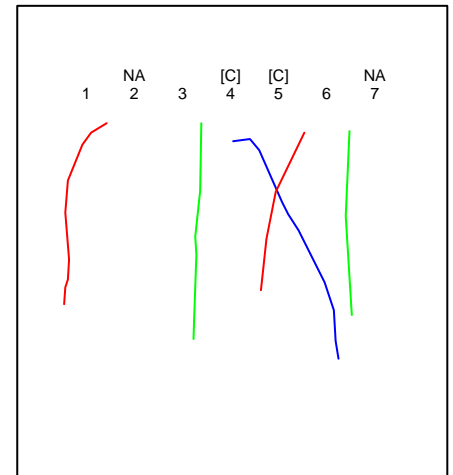

IL4-1 REP2 plate A – Experiment REP2  
Livingstone/roots.tsv

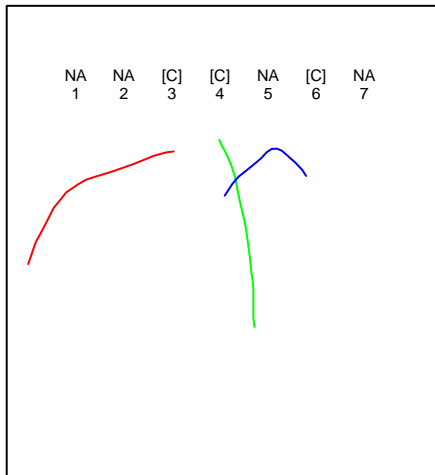

IL4-1 REP2 plate B – Experiment REP2  
Livingstone/roots.tsv

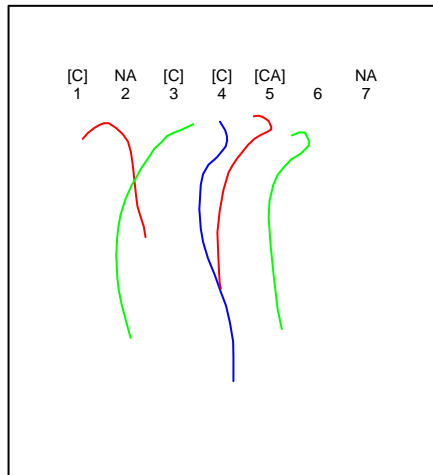

IL4-1 REP3 plate A – Experiment REP3  
Livingstone/roots.tsv

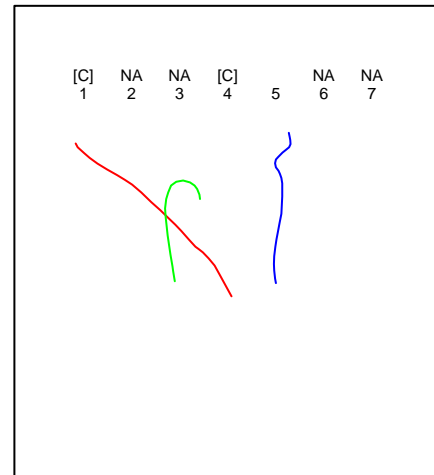

IL4-1 REP3 plate B – Experiment REP3  
Livingstone/roots.tsv

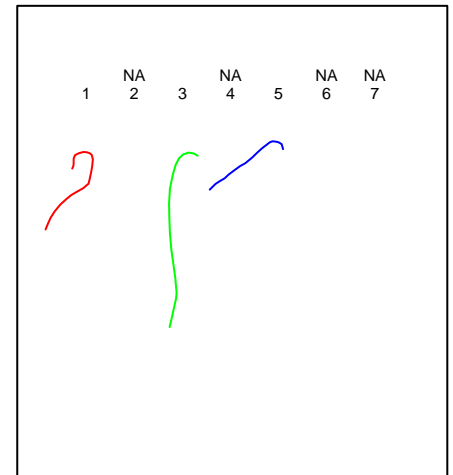

IL4-1 REP4 plate A – Experiment REP4  
Livingstone/roots.tsv

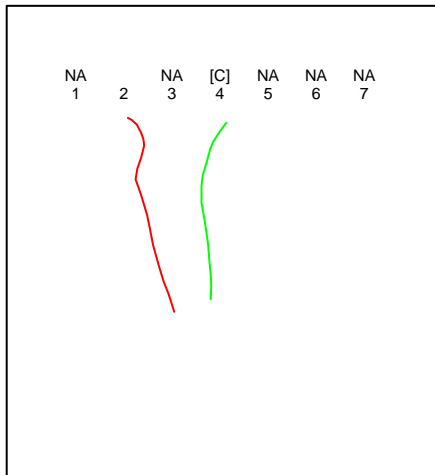

IL4-1 REP4 plate B – Experiment REP4  
Livingstone/roots.tsv

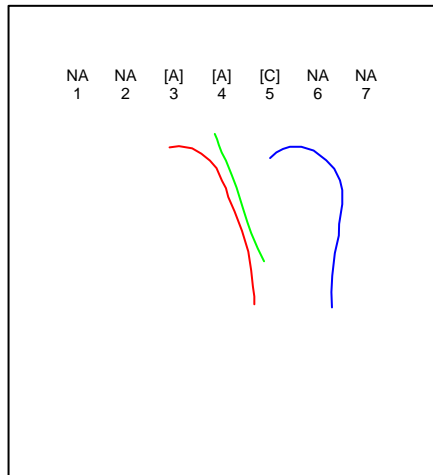

IL4-1 REP5 plate A – Experiment REP5  
Livingstone/roots.tsv

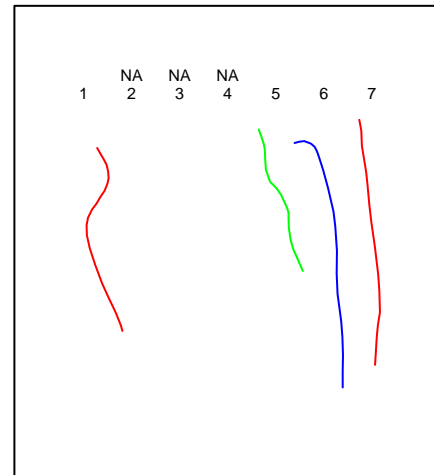

IL4-1 REP5 plate B – Experiment REP5  
Livingstone/roots.tsv

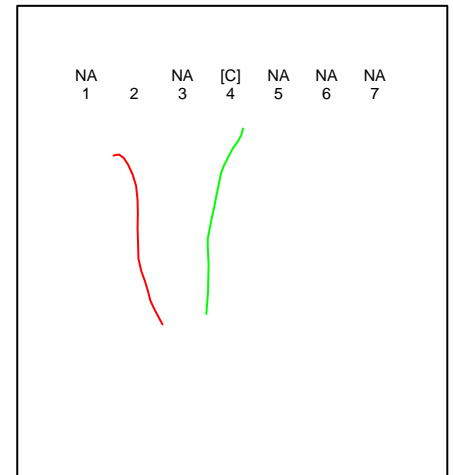

IL4-1 REP4 plate A – Experiment REPX1  
SiobhanMeasurements/Results\_01\_15\_15.tsv

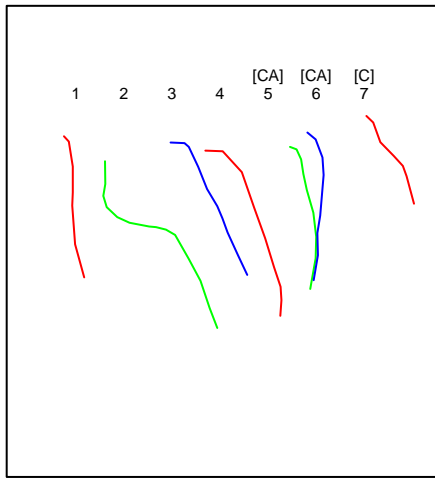

IL4-1 REP4 plate B – Experiment REPX1  
SiobhanMeasurements/Results\_01\_15\_15.tsv

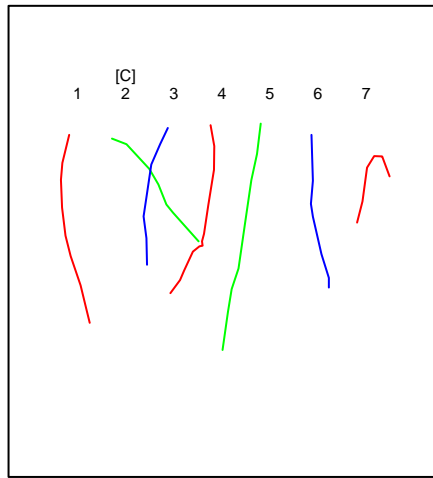

IL4-1 REP4 plate C – Experiment REPX1  
SiobhanMeasurements/Results\_01\_15\_15.tsv

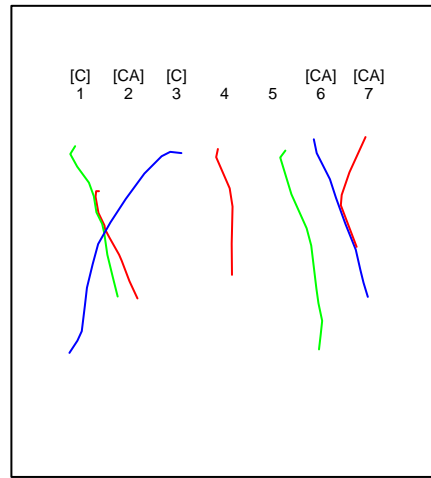

IL4-2 REP2 plate A – Experiment REP2  
Livingstone/roots.tsv

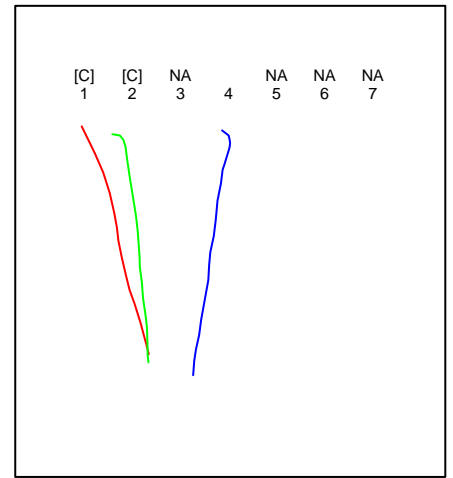

IL4-2 REP2 plate B – Experiment REP2  
Livingstone/roots.tsv

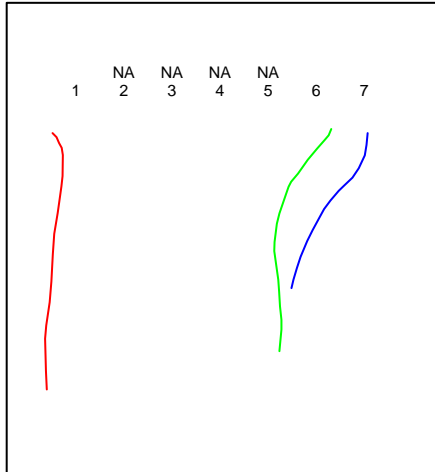

IL4-2 REP3 plate A – Experiment REP3  
SiobhanMeasurements/Results\_1\_1\_15.tsv

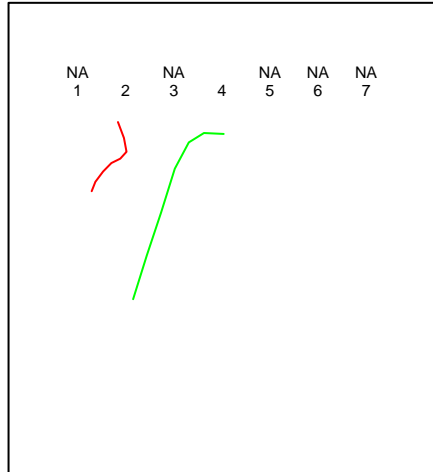

IL4-2 REP3 plate B – Experiment REP3  
SiobhanMeasurements/Results\_1\_1\_15.tsv

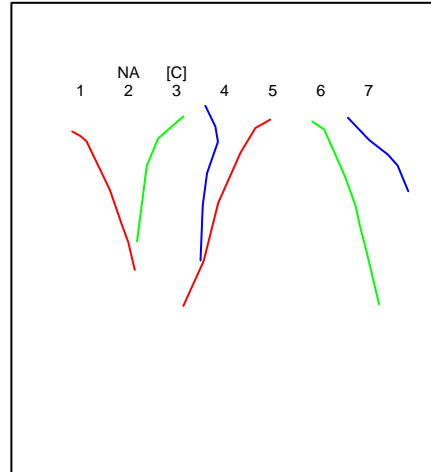

IL4-2 REP4 plate A – Experiment REP4  
SiobhanMeasurements/Results\_1\_1\_15.tsv

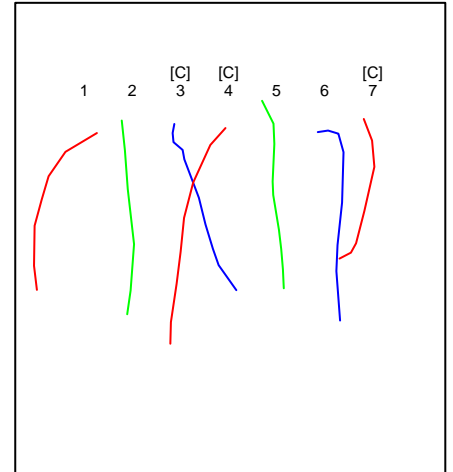

IL4-2 REP4 plate B – Experiment REP4  
SiobhanMeasurements/Results\_1\_1\_15.tsv

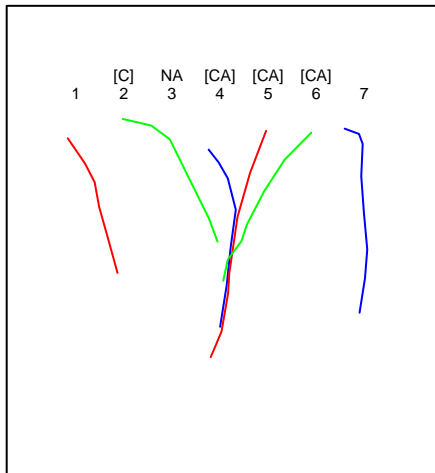

IL4-2 REP5 plate A – Experiment REP5  
SiobhanMeasurements/Results\_1\_1\_15.tsv

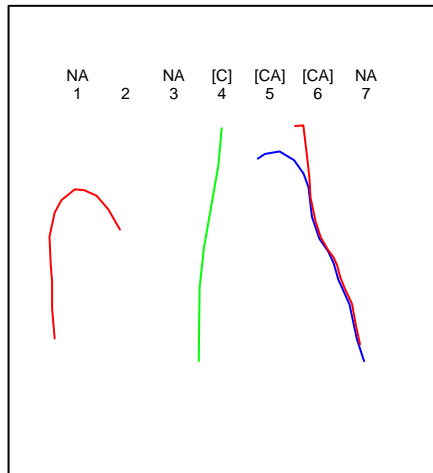

IL4-2 REP5 plate B – Experiment REP5  
SiobhanMeasurements/Results\_1\_1\_15.tsv

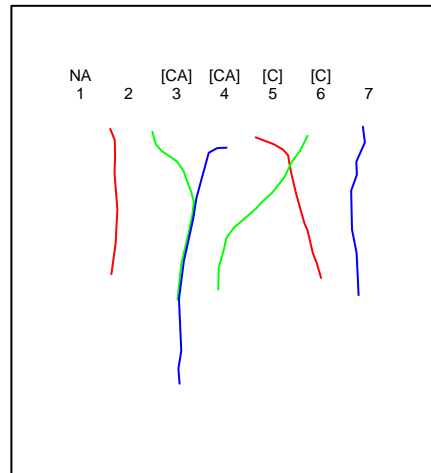

IL4-3 REP2 plate A – Experiment REP2  
Livingstone/roots.tsv

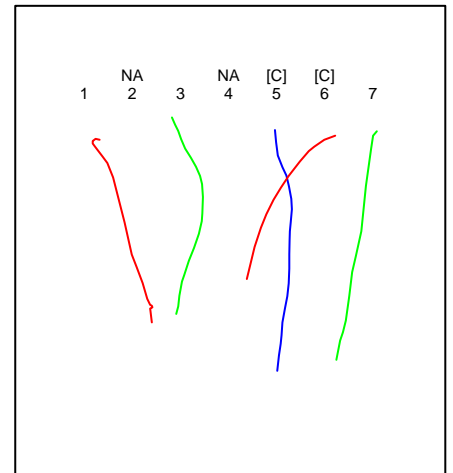

IL4-3 REP2 plate B – Experiment REP2  
Livingstone/roots.tsv

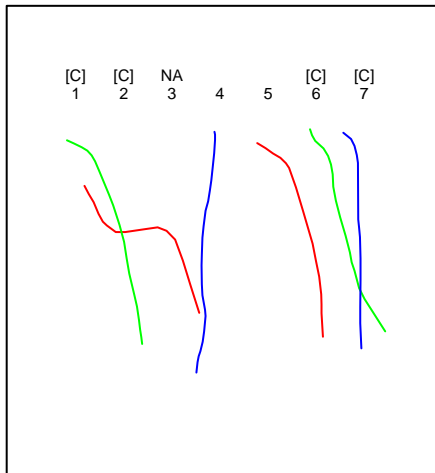

IL4-3 REP3 plate A – Experiment REP3  
Livingstone/roots.tsv

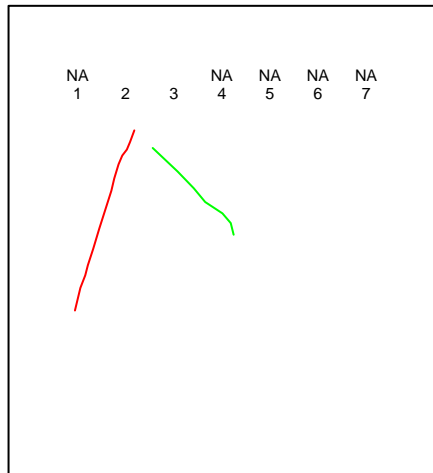

IL4-3 REP3 plate B – Experiment REP3  
Livingstone/roots.tsv

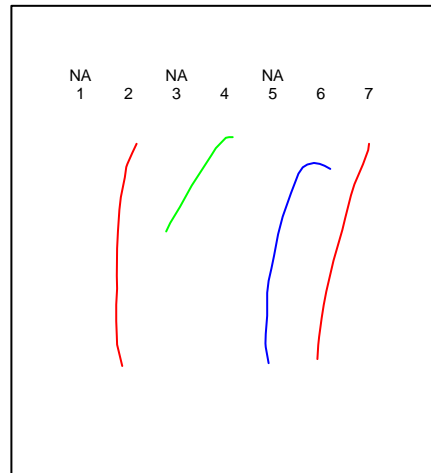

IL4-3 REP4 plate A – Experiment REP4  
Livingstone/roots.tsv

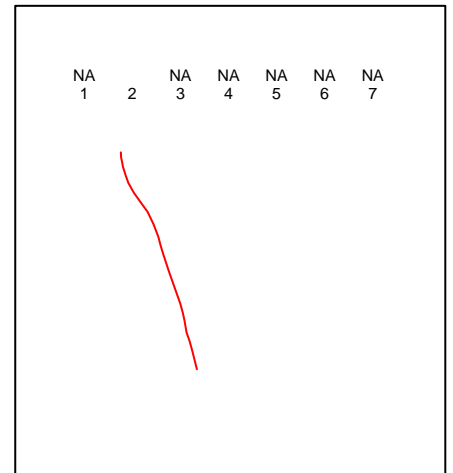

IL4-3 REP4 plate B – Experiment REP4  
Livingstone/roots.tsv

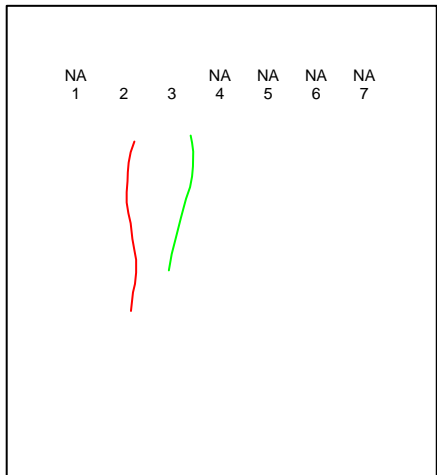

IL4-3 REP5 plate A – Experiment REP5  
Livingstone/roots.tsv

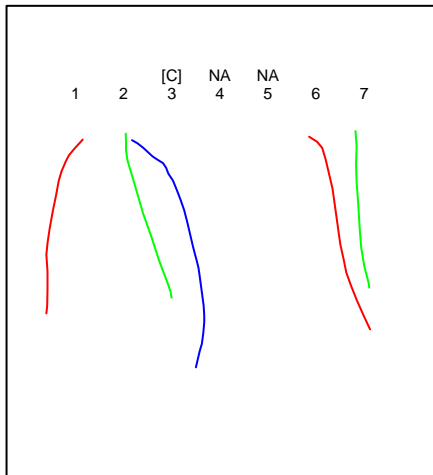

IL4-3 REP5 plate B – Experiment REP5  
Livingstone/roots.tsv

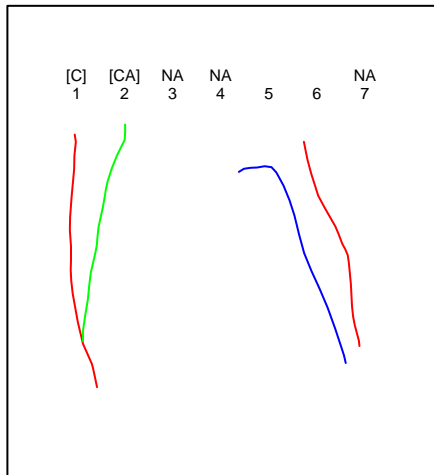

IL4-3 REP2 plate A – Experiment REP2  
SiobhanMeasurements/Results\_01\_15\_15.tsv

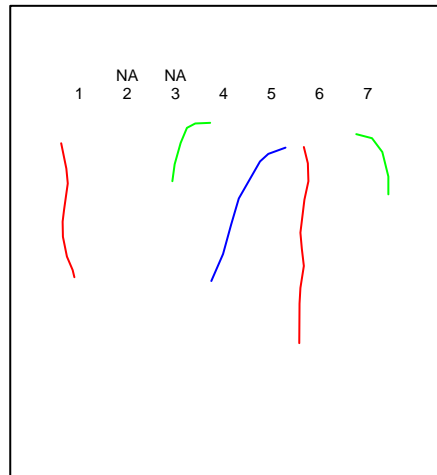

IL4-3 REP2 plate B – Experiment REP2  
SiobhanMeasurements/Results\_01\_15\_15.tsv

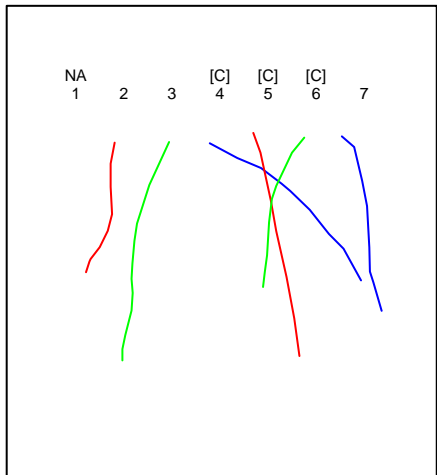

IL4-3 REP3 plate A – Experiment REP3  
SiobhanMeasurements/Results\_01\_15\_15.tsv

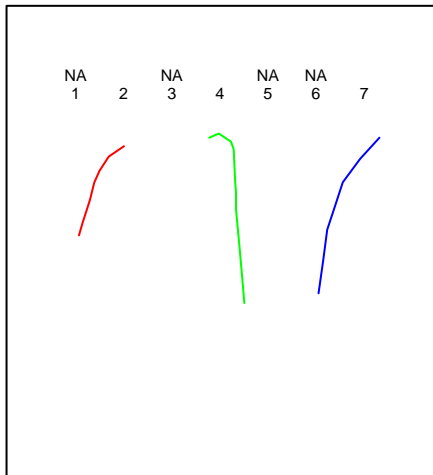

IL4-3 REP3 plate B – Experiment REP3  
SiobhanMeasurements/Results\_01\_15\_15.tsv

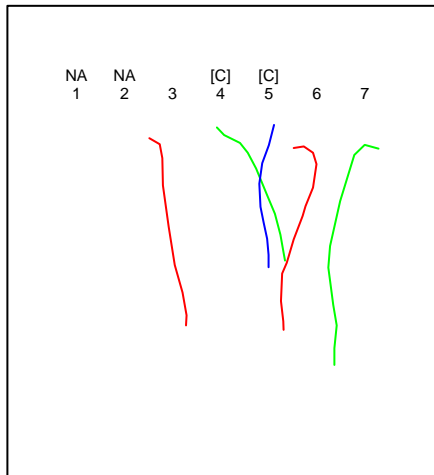

IL4-3 REP4 plate A – Experiment REP4  
SiobhanMeasurements/Results\_01\_15\_15.tsv

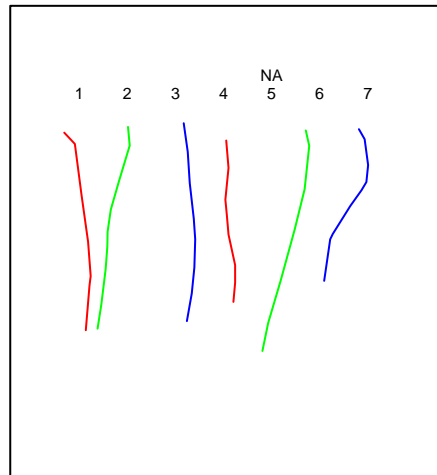

IL4-3 REP4 plate B – Experiment REP4  
SiobhanMeasurements/Results\_01\_15\_15.tsv

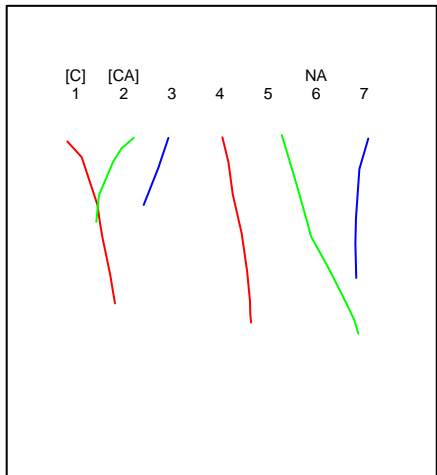

IL4-3 REP5 plate A – Experiment REP5  
SiobhanMeasurements/Results\_01\_15\_15.tsv

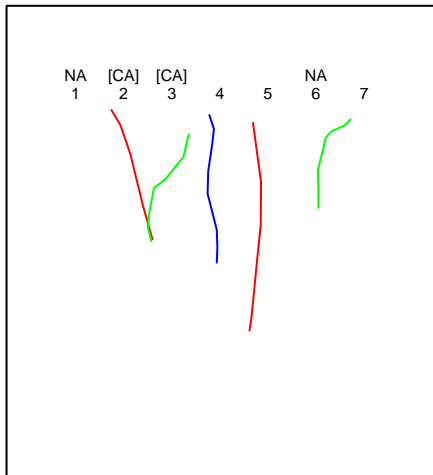

IL4-3 REP5 plate B – Experiment REP5  
SiobhanMeasurements/Results\_01\_15\_15.tsv

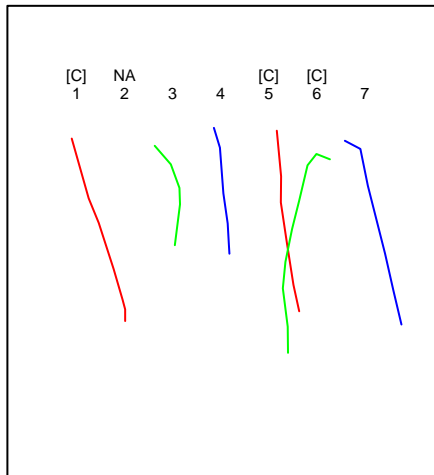

IL4-3-2 REP2 plate A – Experiment REP2  
Livingstone/roots.tsv

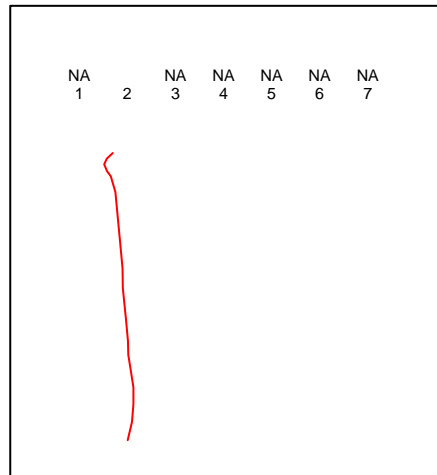

IL4-3-2 REP2 plate B – Experiment REP2  
Livingstone/roots.tsv

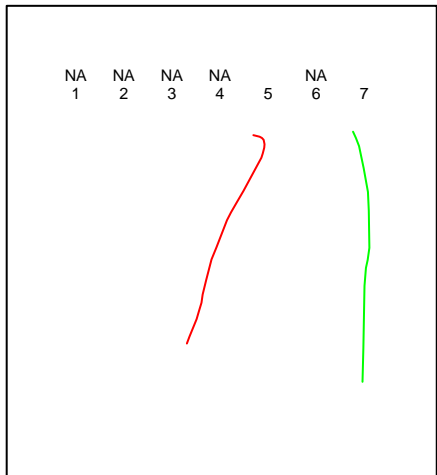

IL4-3-2 REP3 plate A – Experiment REP3  
Livingstone/roots.tsv

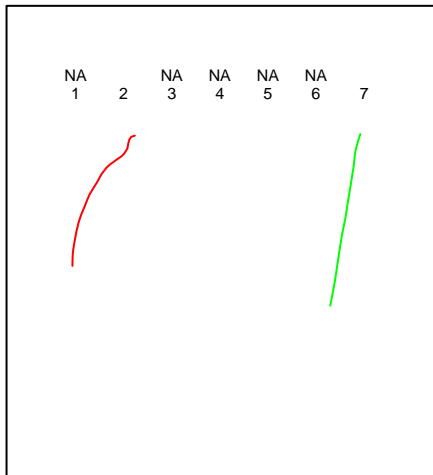

IL4-3-2 REP3 plate B – Experiment REP3  
Livingstone/roots.tsv

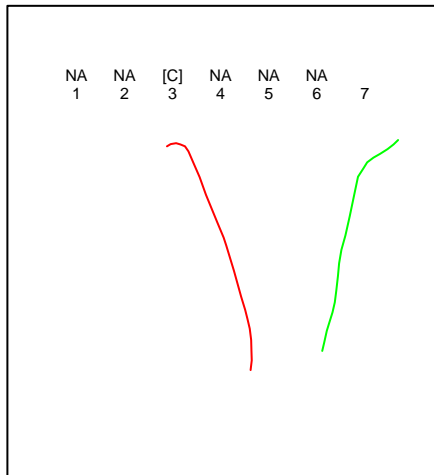

IL4-3-2 REP4 plate A – Experiment REP4  
Livingstone/roots.tsv

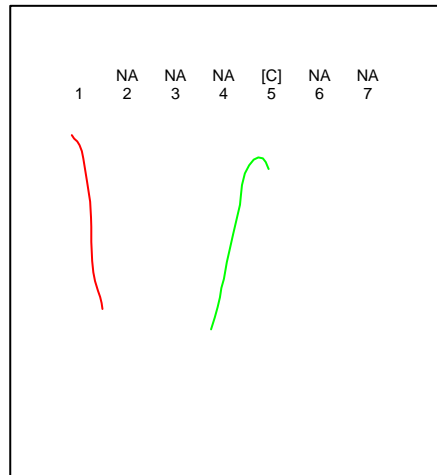

IL4-3-2 REP4 plate B – Experiment REP4  
Livingstone/roots.tsv

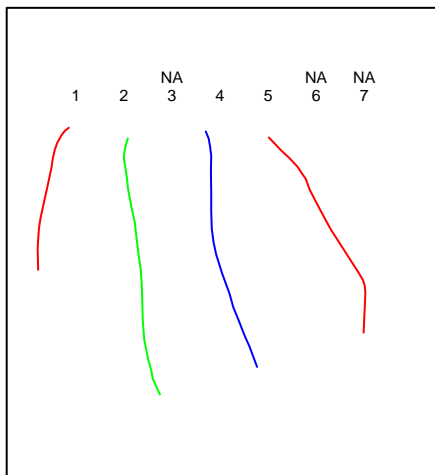

IL4-3-2 REP5 plate A – Experiment REP5  
Livingstone/roots.tsv

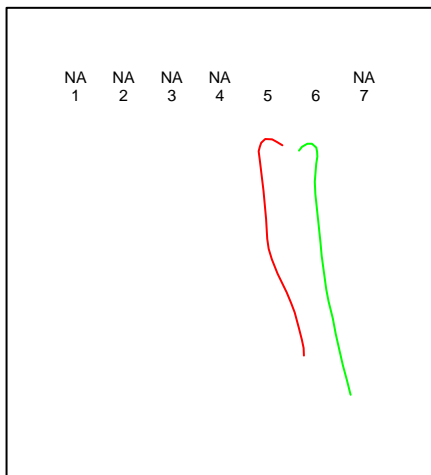

IL4-3-2 REP5 plate B – Experiment REP5  
Livingstone/roots.tsv

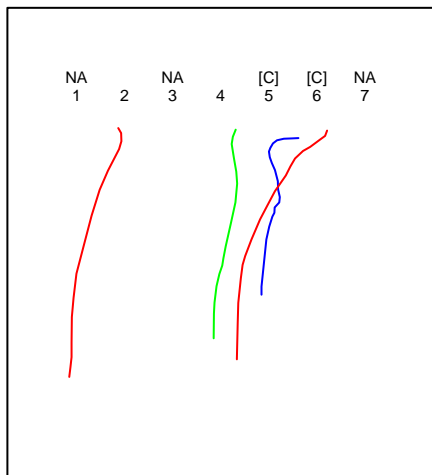

IL4-3-2 REP2 plate A - Experiment REPN2  
SiobhanMeasurements/Results\_01\_15\_15.tsv

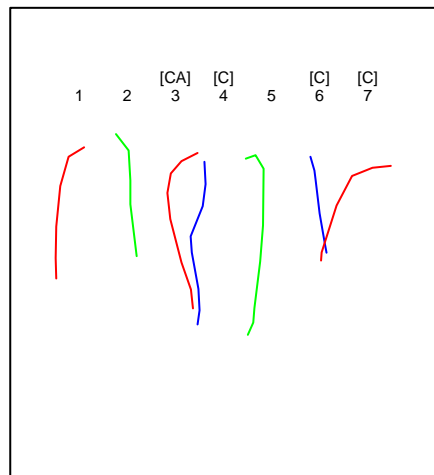

IL4-3-2 REP2 plate B – Experiment REPN2  
SiobhanMeasurements/Results\_01\_15\_15.tsv

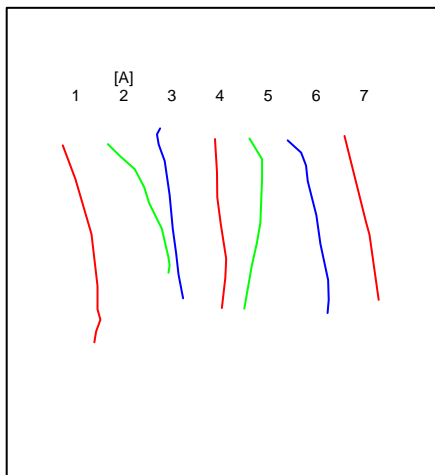

IL4-3-2 REP3 plate A – Experiment REPN3  
SiobhanMeasurements/Results\_01\_15\_15.tsv

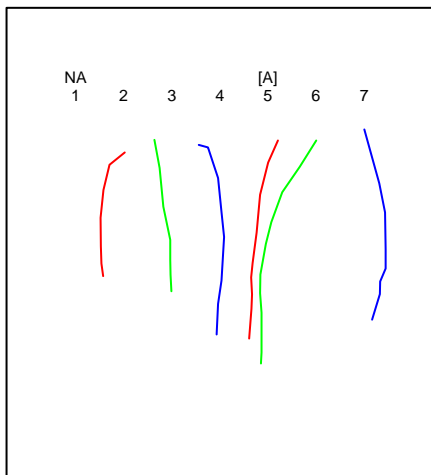

IL4-3-2 REP3 plate B – Experiment REPN3  
SiobhanMeasurements/Results\_01\_15\_15.tsv

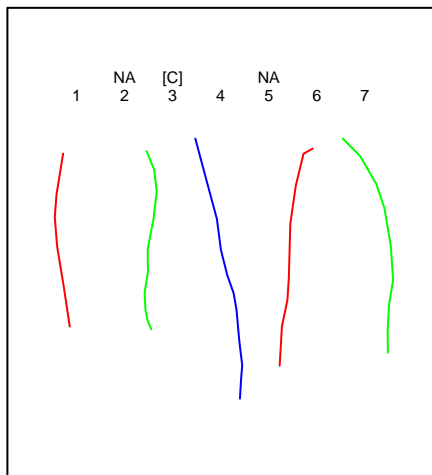

IL4-3-2 REP4 plate A – Experiment REPN4  
SiobhanMeasurements/Results\_01\_15\_15.tsv

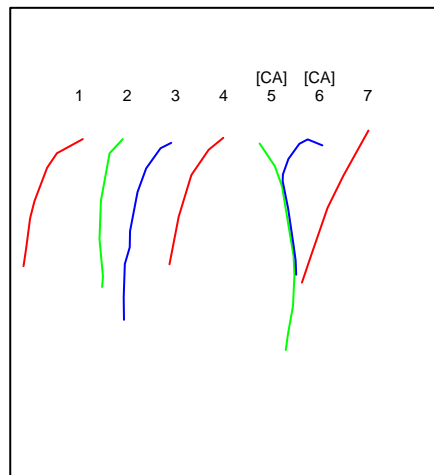

IL4-3-2 REP4 plate B – Experiment REPN4  
SiobhanMeasurements/Results\_01\_15\_15.tsv

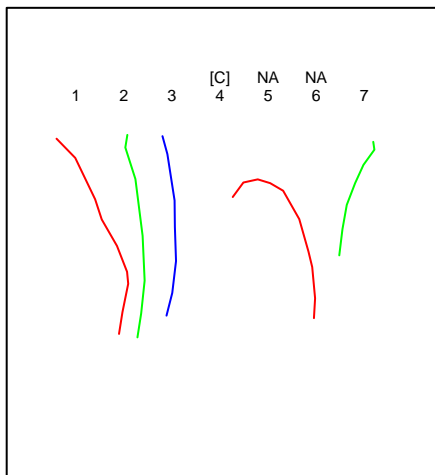

IL4-3-2 REP5 plate A – Experiment REPN5  
SiobhanMeasurements/Results\_01\_15\_15.tsv

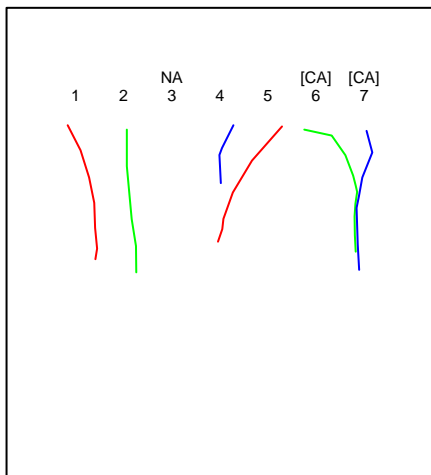

IL4-3-2 REP5 plate B – Experiment REPN5  
SiobhanMeasurements/Results\_01\_15\_15.tsv

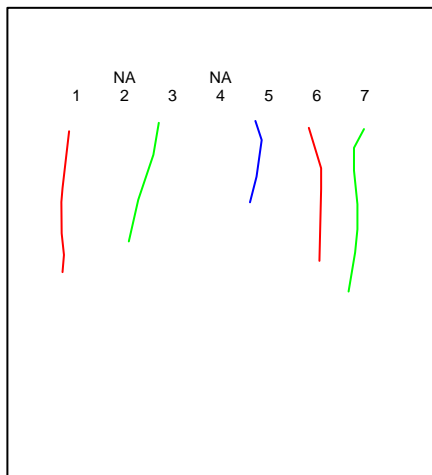

IL4-4 REP2 plate A – Experiment REP2  
Livingstone/roots.tsv

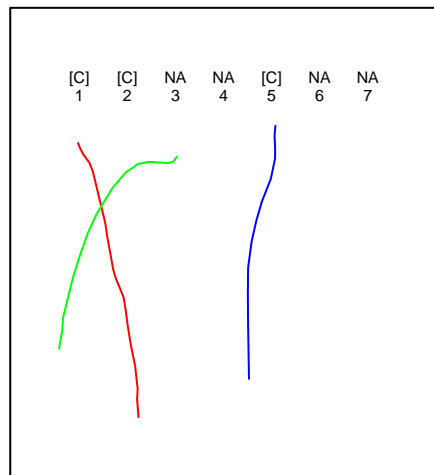

IL4-4 REP2 plate B – Experiment REP2  
Livingstone/roots.tsv

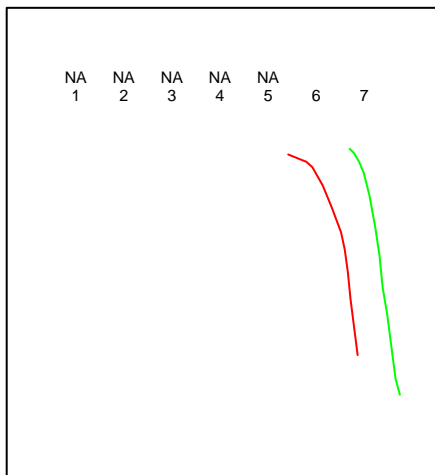

IL4-4 REP3 plate A – Experiment REP3  
Livingstone/roots.tsv

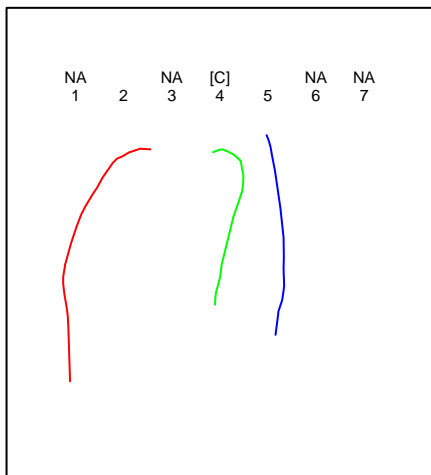

IL4-4 REP3 plate B – Experiment REP3  
Livingstone/roots.tsv

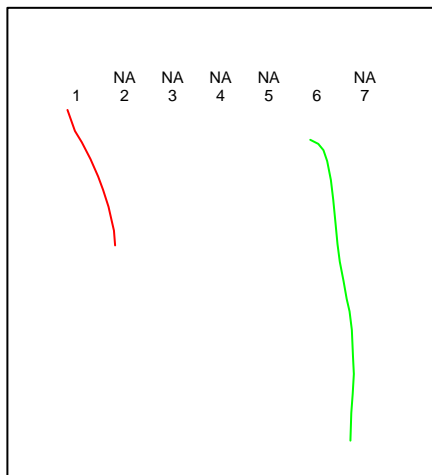

IL4-4 REP4 plate A – Experiment REP4  
Livingstone/roots.tsv

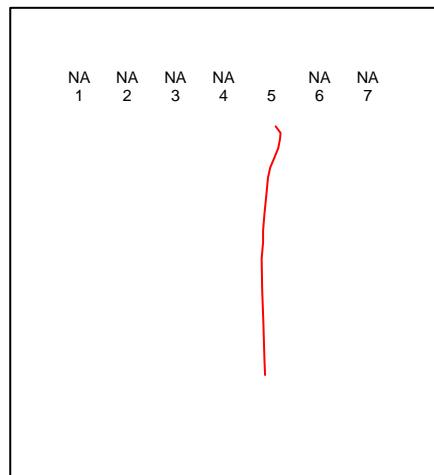

IL4-4 REP4 plate B – Experiment REP4  
Livingstone/roots.tsv

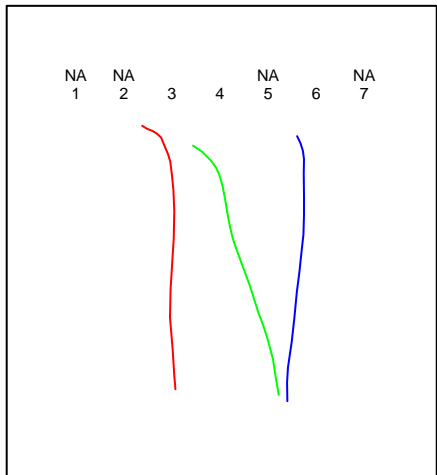

IL4-4 REP5 plate A – Experiment REP5  
Livingstone/roots.tsv

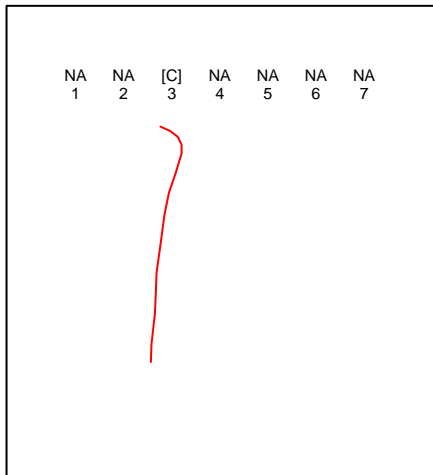

IL4-4 REP5 plate B – Experiment REP5  
Livingstone/roots.tsv

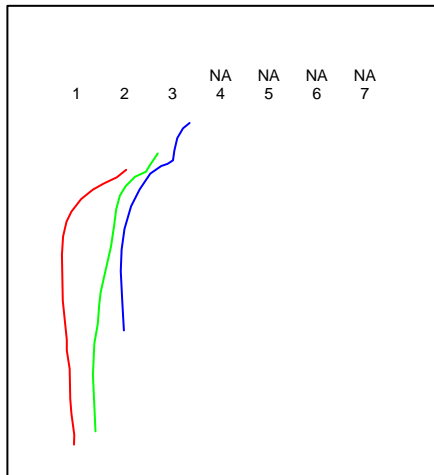

IL4-4 REP2 plate A – Experiment REP2  
SiobhanMeasurements/Results\_01\_15\_15.tsv

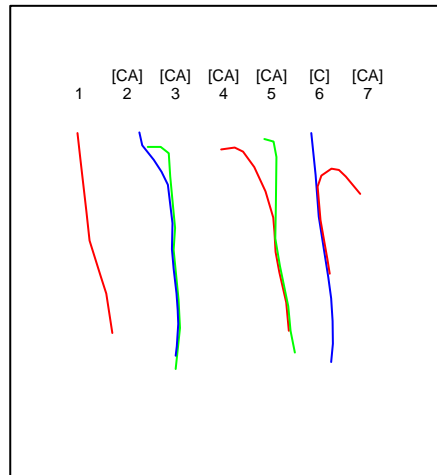

IL4-4 REP2 plate B – Experiment REP2  
SiobhanMeasurements/Results\_01\_15\_15.tsv

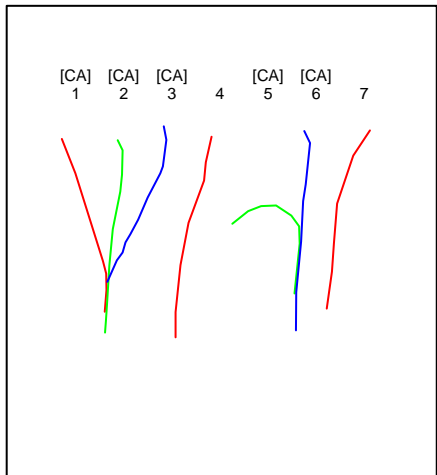

IL4-4 REP3 plate A – Experiment REP3  
SiobhanMeasurements/Results\_01\_15\_15.tsv

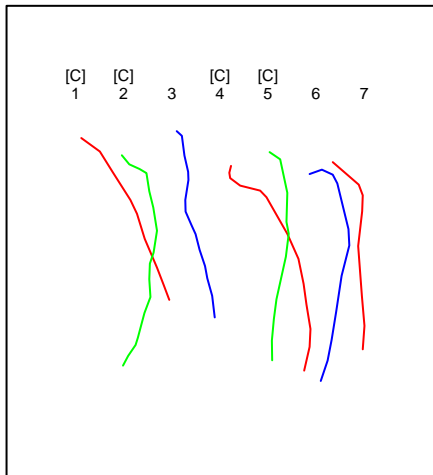

IL4-4 REP3 plate B – Experiment REP3  
SiobhanMeasurements/Results\_01\_15\_15.tsv

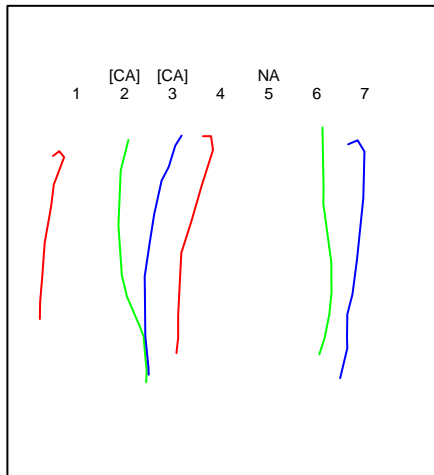

IL4-4 REP4 plate A – Experiment REP4  
SiobhanMeasurements/Results\_01\_15\_15.tsv

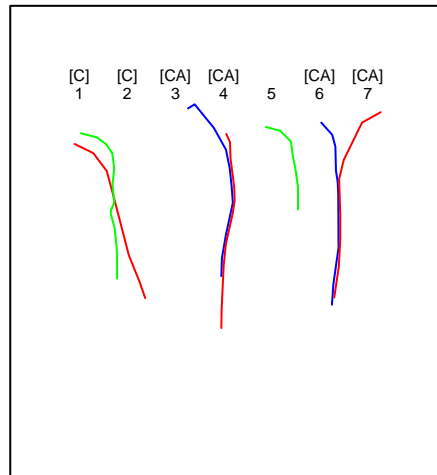

IL4-4 REP4 plate B – Experiment REP4  
SiobhanMeasurements/Results\_01\_15\_15.tsv

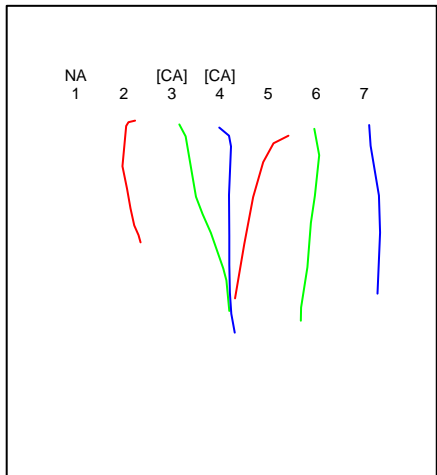

IL4-4 REP5 plate A – Experiment REP5  
SiobhanMeasurements/Results\_01\_15\_15.tsv

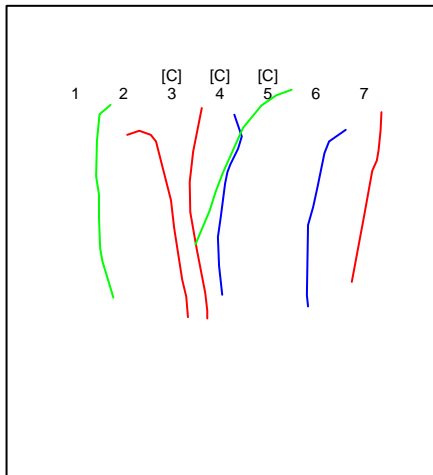

IL4-4 REP5 plate B – Experiment REP5  
SiobhanMeasurements/Results\_01\_15\_15.tsv

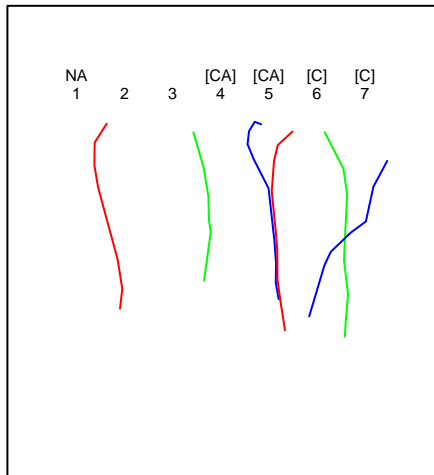

IL5-1 REP2 plate A – Experiment REP2  
SiobhanMeasurements/Siobhan\_Results\_11\_30.tsv

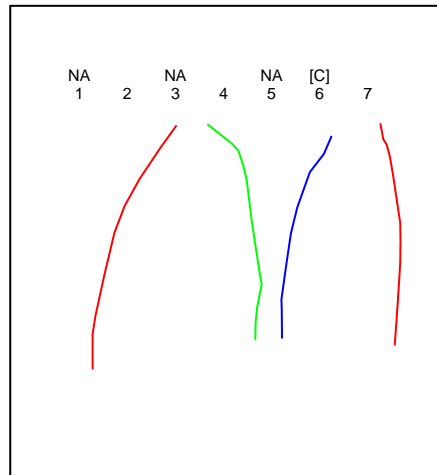

IL5-1 REP2 plate B – Experiment REP2  
SiobhanMeasurements/Siobhan\_Results\_11\_30.tsv

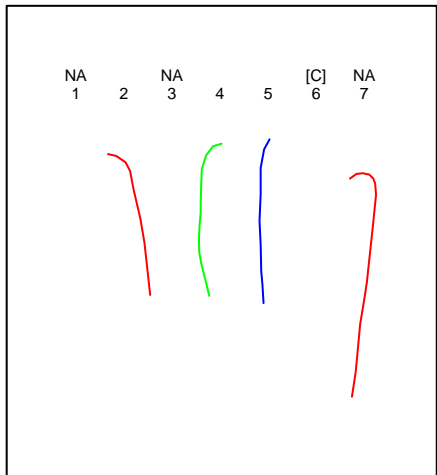

IL5-1 REP3 plate A – Experiment REP3  
SiobhanMeasurements/Siobhan\_Results\_11\_30.tsv

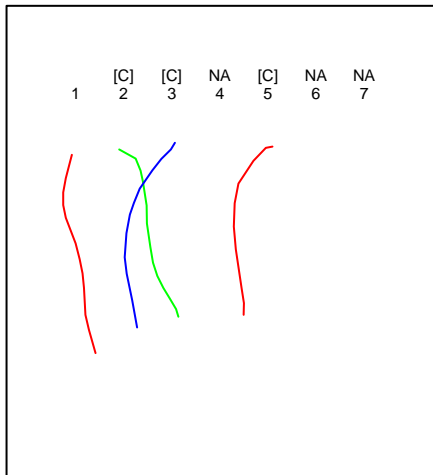

IL5-1 REP3 plate B – Experiment REP3  
SiobhanMeasurements/Siobhan\_Results\_11\_30.tsv

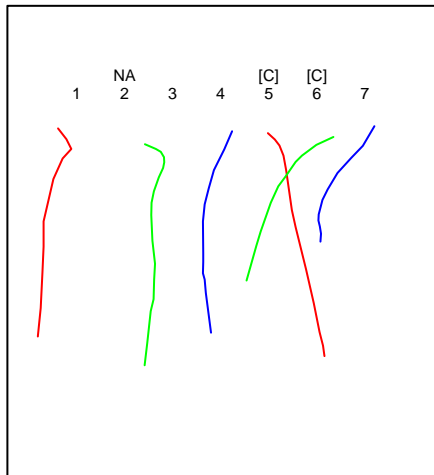

IL5-1 REP5 plate A – Experiment REP5  
SiobhanMeasurements/Siobhan\_Results\_11\_30.tsv

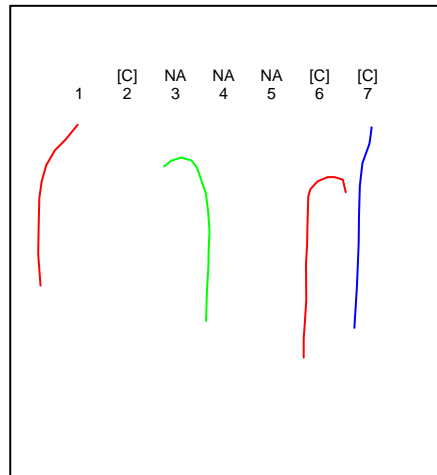

IL5-1 REP5 plate B – Experiment REP5  
SiobhanMeasurements/Siobhan\_Results\_11\_30.tsv

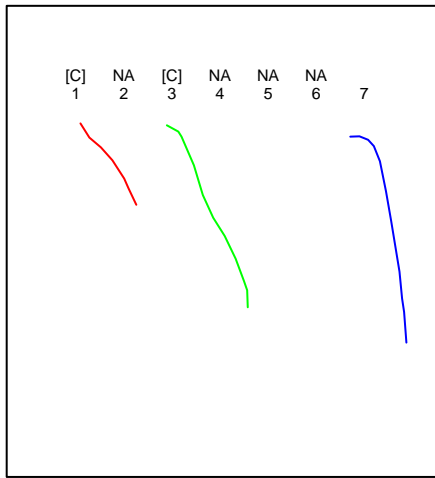

IL5-1 UNKN plate A – Experiment REPX1  
SiobhanMeasurements/Siobhan\_Results\_11\_30.tsv

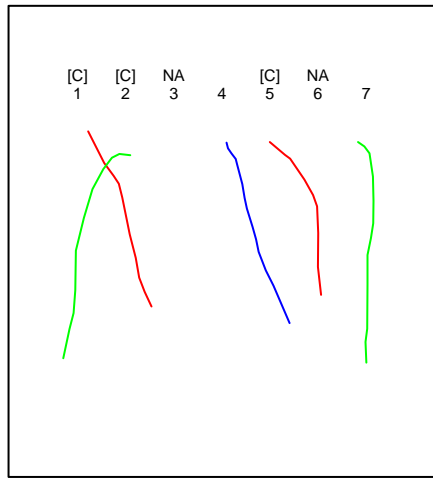

IL5-1 UNKN plate B – Experiment REPX1  
SiobhanMeasurements/Siobhan\_Results\_11\_30.tsv

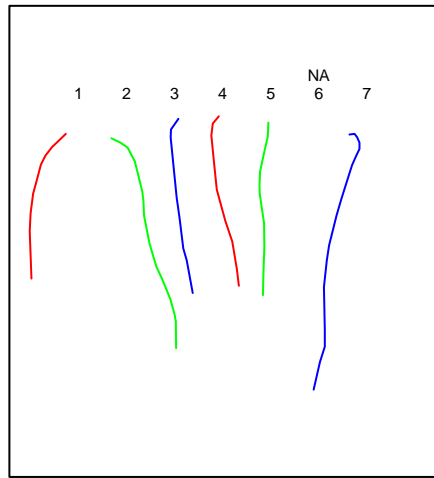

IL5-1 UNKN plate A – Experiment REPX2  
SiobhanMeasurements/Siobhan\_Results\_11\_30.tsv

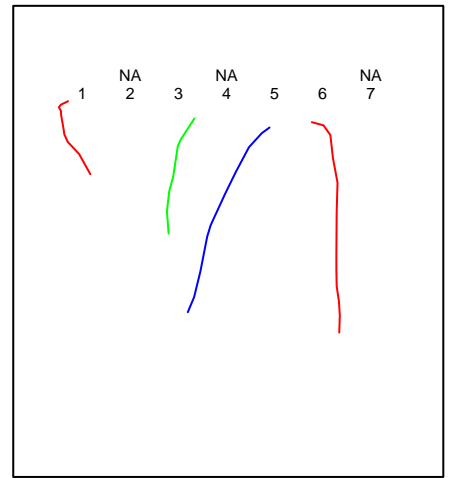

IL5-1 UNKN plate B – Experiment REPX2  
SiobhanMeasurements/Siobhan\_Results\_11\_30.tsv

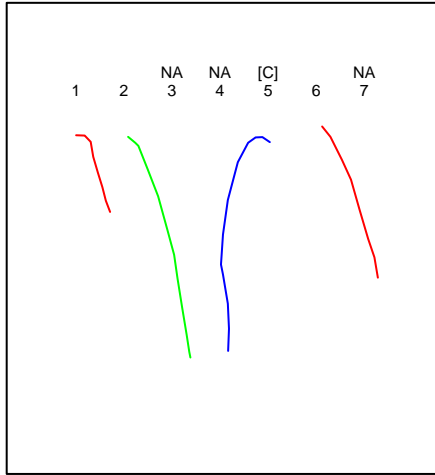

IL5-1 UNKN plate C – Experiment REPX2  
SiobhanMeasurements/Siobhan\_Results\_11\_30.tsv

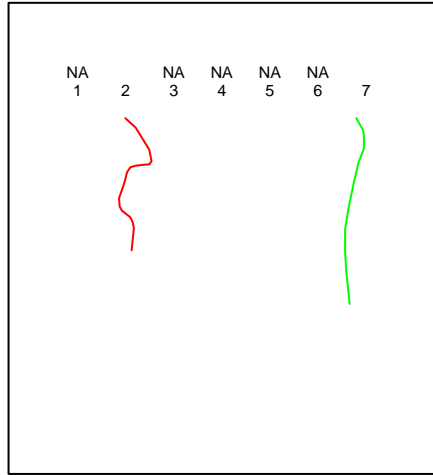

IL5-2 REP2 plate A – Experiment REP2  
SiobhanMeasurements/Results\_XMAS\_2014.tsv

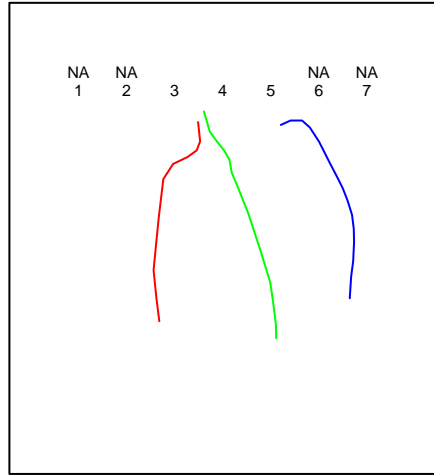

IL5-2 REP2 plate B – Experiment REP2  
SiobhanMeasurements/Results\_XMAS\_2014.tsv

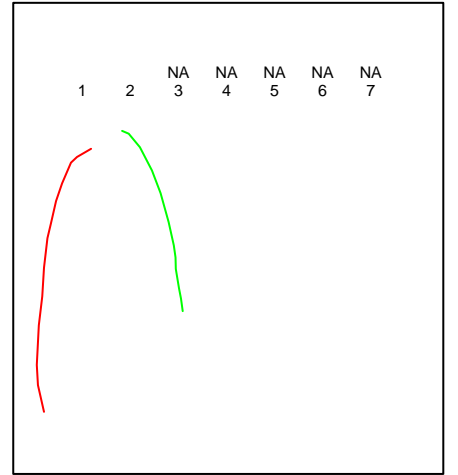

IL5-2 REP3 plate A – Experiment REP3  
SiobhanMeasurements/Results\_XMAS\_2014.tsv

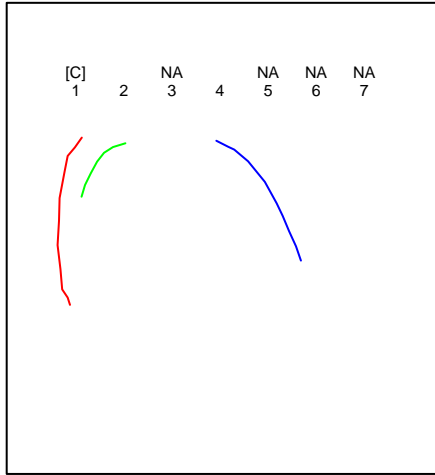

IL5-2 REP4 plate A – Experiment REP4  
SiobhanMeasurements/Results\_XMAS\_2014.tsv

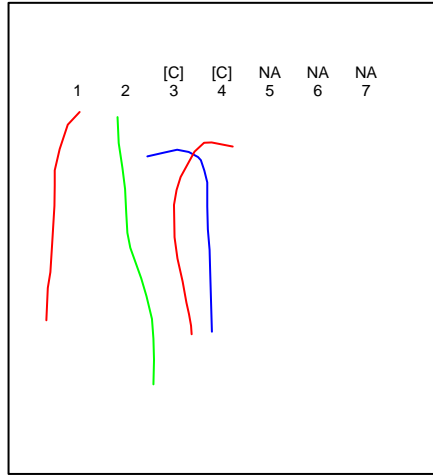

IL5-2 REP4 plate B – Experiment REP4  
SiobhanMeasurements/Results\_XMAS\_2014.tsv

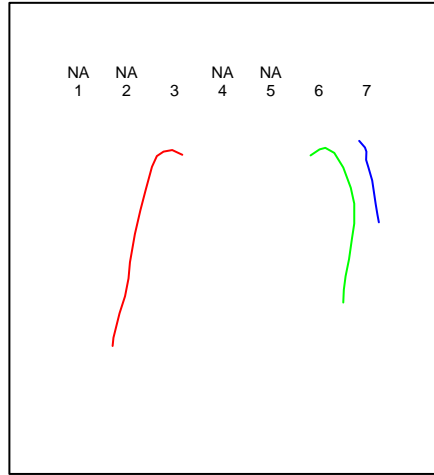

IL5-2 REP5 plate A – Experiment REP5  
SiobhanMeasurements/Results\_XMAS\_2014.tsv

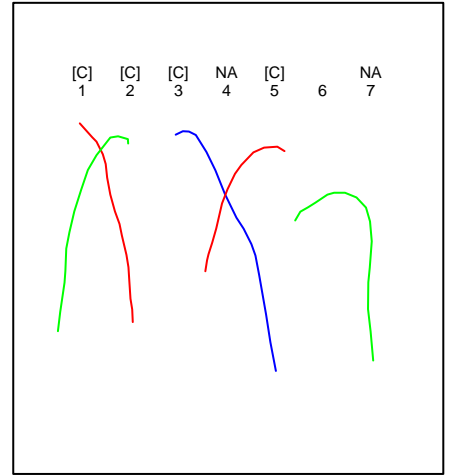

IL5-2 REP5 plate B – Experiment REP5  
SiobhanMeasurements/Results\_XMAS\_2014.tsv

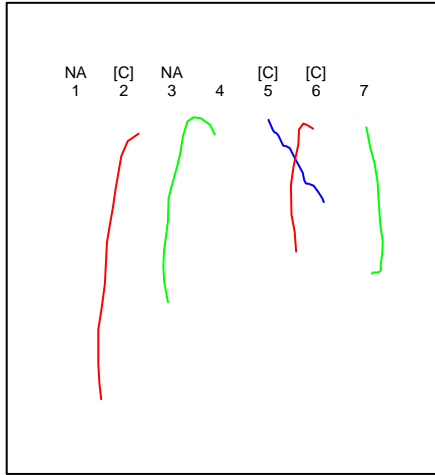

IL5-3 REP2 plate A – Experiment REP2  
Livingstone/roots.tsv

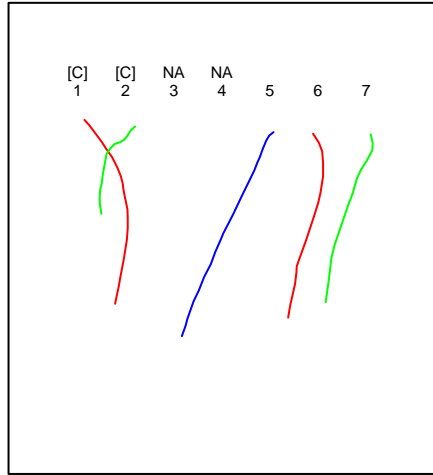

IL5-3 REP2 plate B – Experiment REP2  
Livingstone/roots.tsv

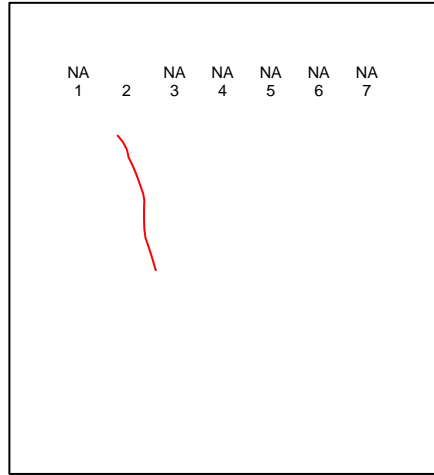

IL5-3 REP3 plate A – Experiment REP3  
Livingstone/roots.tsv

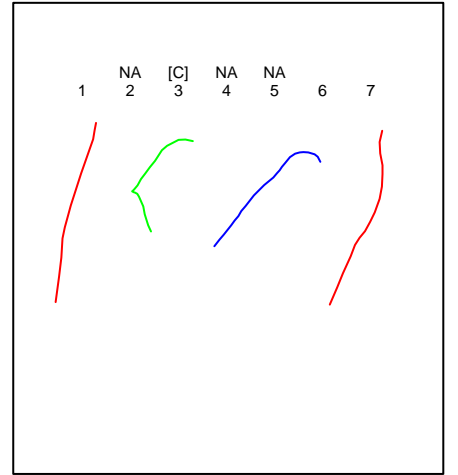

IL5-3 REP3 plate B – Experiment REP3  
Livingstone/roots.tsv

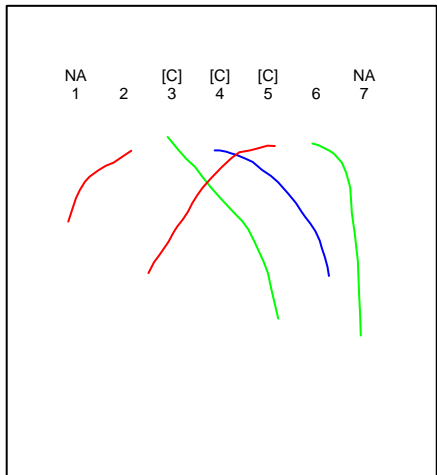

IL5-3 REP4 plate A – Experiment REP4  
SiobhanMeasurements/Results\_1\_1\_15.tsv

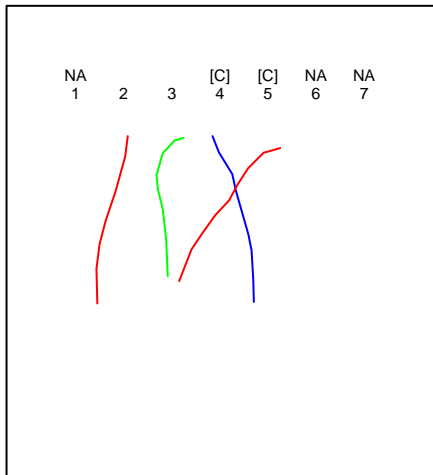

IL5-3 REP4 plate B – Experiment REP4  
SiobhanMeasurements/Results\_1\_1\_15.tsv

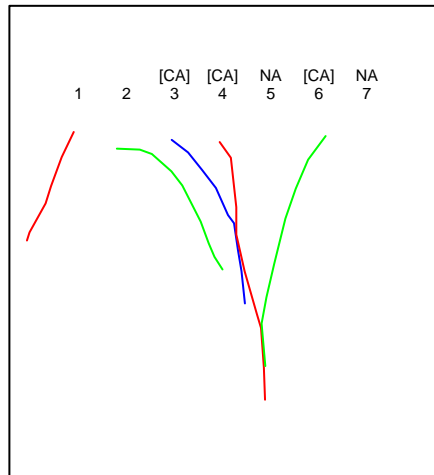

IL5-3 REP5 plate A – Experiment REP5  
SiobhanMeasurements/Results\_1\_1\_15.tsv

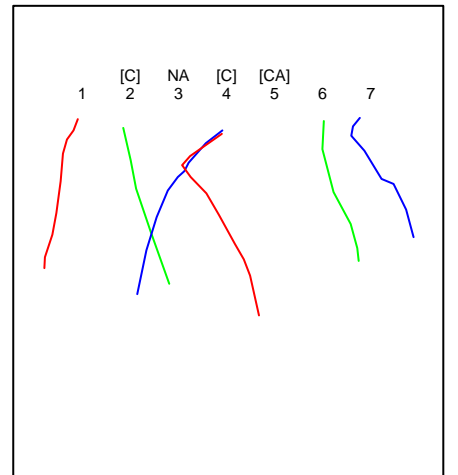

IL5-3 REP5 plate B – Experiment REP5  
SiobhanMeasurements/Results\_1\_1\_15.tsv

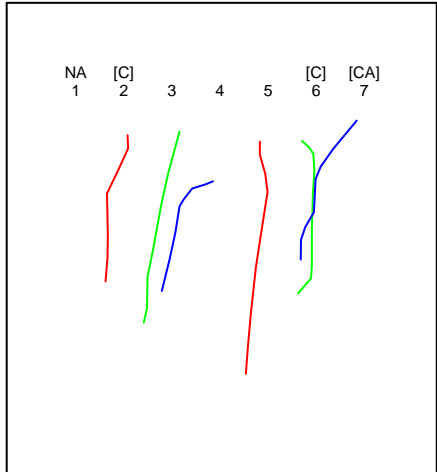

IL5-4 REP2 plate A – Experiment REP2  
SiobhanMeasurements/Results\_1\_1\_15.tsv

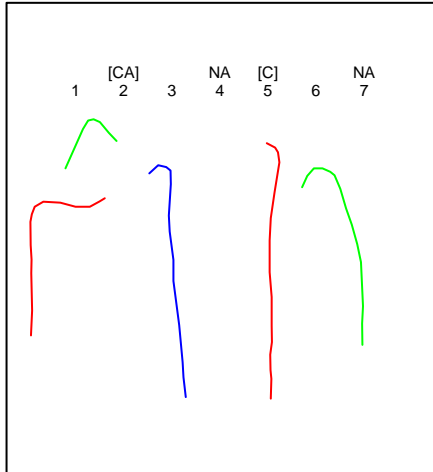

IL5-4 REP2 plate B – Experiment REP2  
SiobhanMeasurements/Results\_1\_1\_15.tsv

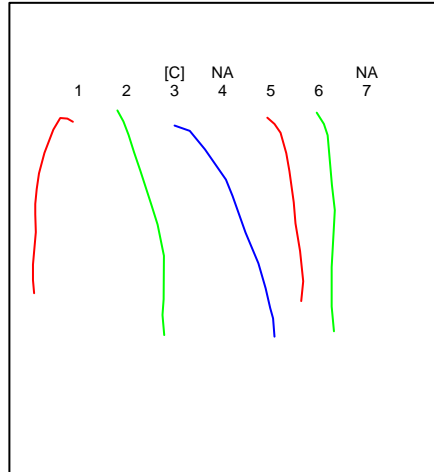

IL5-4 REP3 plate A – Experiment REP3  
SiobhanMeasurements/Results\_1\_1\_15.tsv

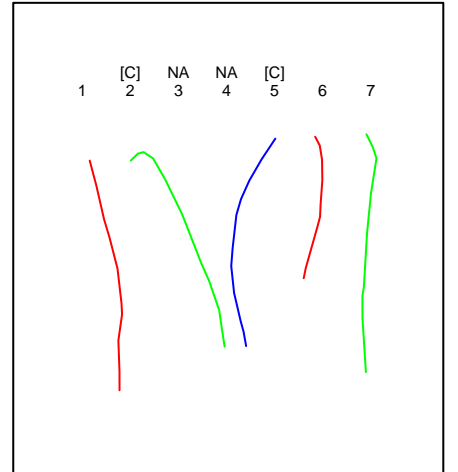

IL5-4 REP3 plate B – Experiment REP3  
SiobhanMeasurements/Results\_1\_1\_15.tsv

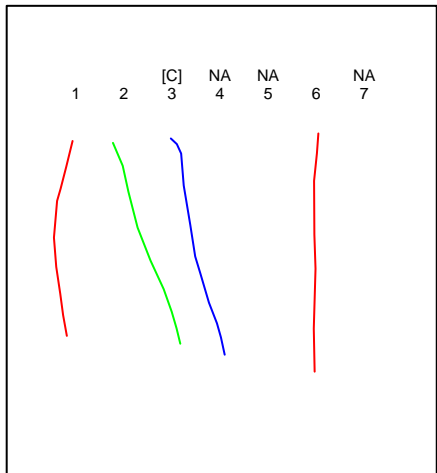

IL5-4 REP4 plate A – Experiment REP4  
SiobhanMeasurements/Results\_1\_1\_15.tsv

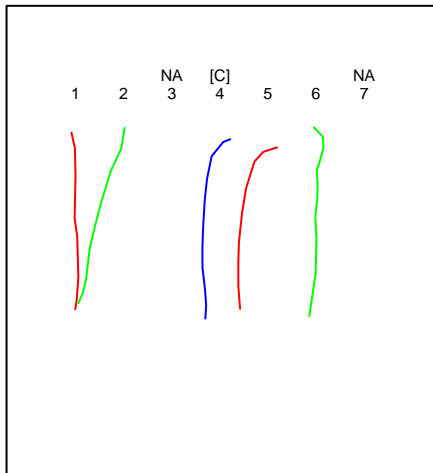

IL5-4 REP4 plate B – Experiment REP4  
SiobhanMeasurements/Results\_1\_1\_15.tsv

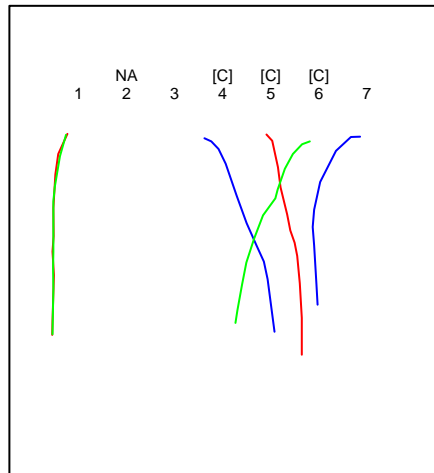

IL5-4 REP5 plate A – Experiment REP5  
SiobhanMeasurements/Results\_1\_1\_15.tsv

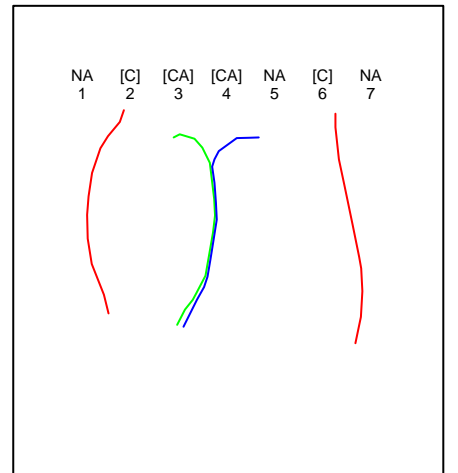

IL5-4 REP5 plate B – Experiment REP5  
SiobhanMeasurements/Results\_1\_1\_15.tsv

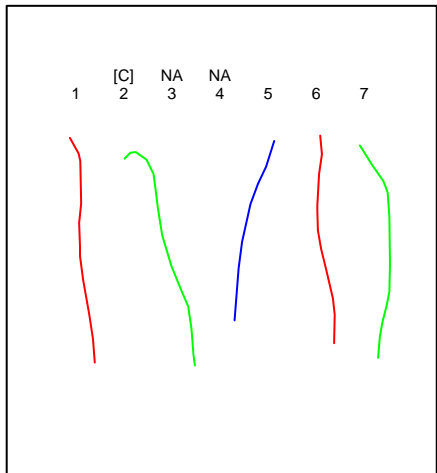

IL5-5 REP3 plate A – Experiment REP3  
SiobhanMeasurements/Results\_1\_1\_15.tsv

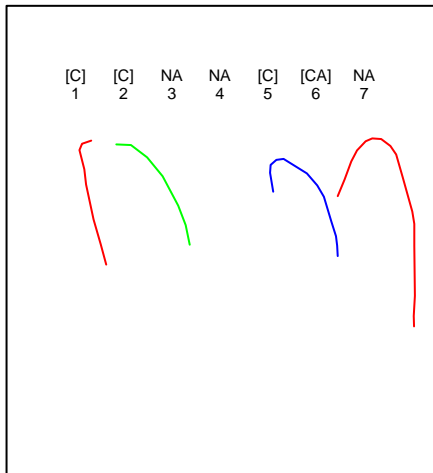

IL5-5 REP3 plate B – Experiment REP3  
SiobhanMeasurements/Results\_1\_1\_15.tsv

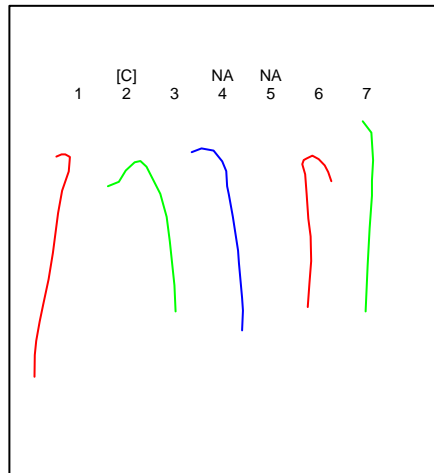

IL5-5 REP4 plate A – Experiment REP4  
SiobhanMeasurements/Results\_1\_1\_15.tsv

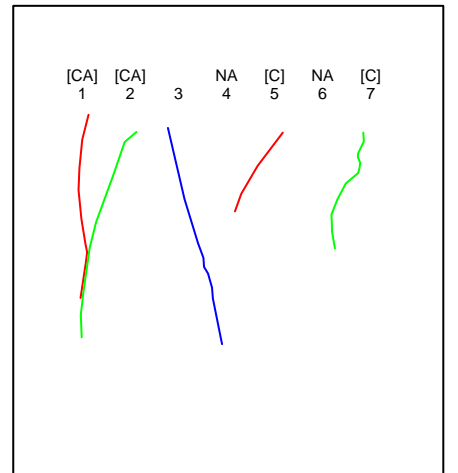

IL5-5 REP4 plate B – Experiment REP4  
SiobhanMeasurements/Results\_1\_1\_15.tsv

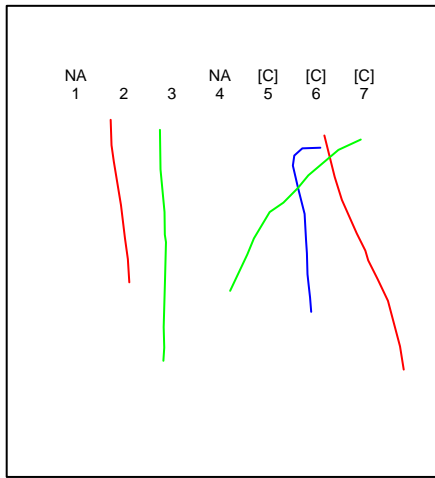

IL5-5 REP5 plate A – Experiment REP5  
SiobhanMeasurements/Results\_1\_1\_15.tsv

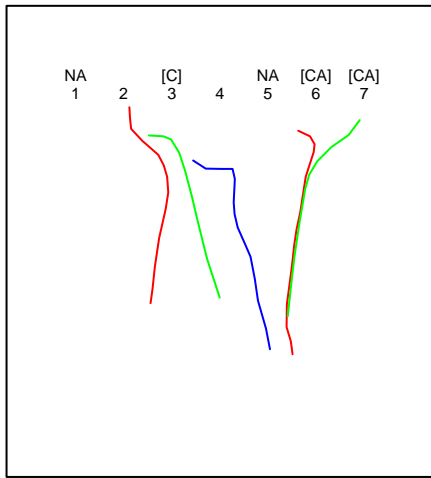

IL5-5 REP5 plate B – Experiment REP5  
SiobhanMeasurements/Results\_1\_1\_15.tsv

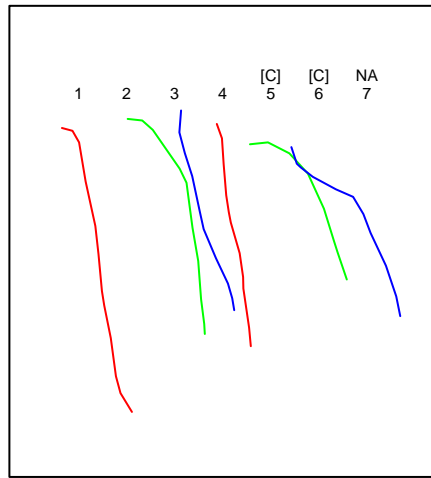

IL6-1 REP2 plate A – Experiment REP2  
Livingstone/roots.tsv

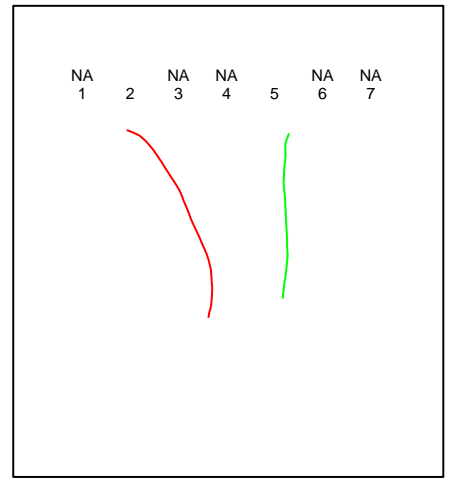

IL6-1 REP2 plate B – Experiment REP2  
Livingstone/roots.tsv

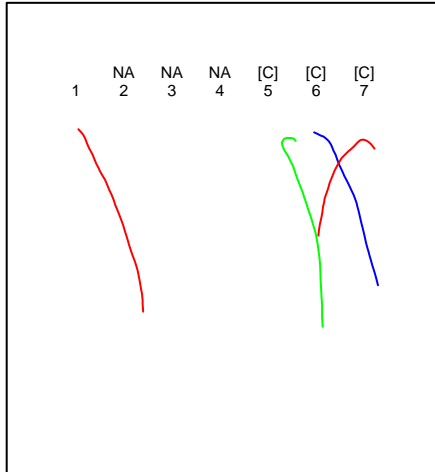

IL6-1 REP3 plate A – Experiment REP3  
Livingstone/roots.tsv

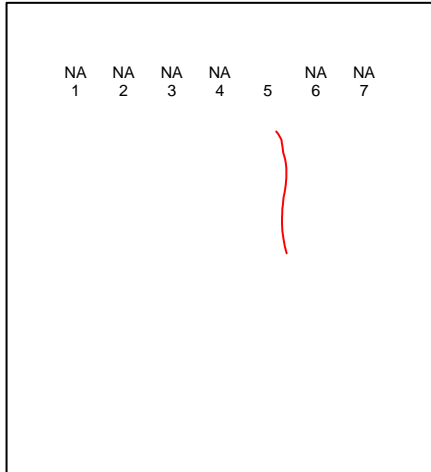

IL6-1 REP3 plate B – Experiment REP3  
Livingstone/roots.tsv

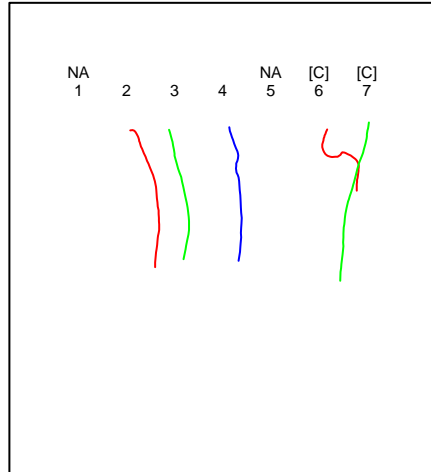

IL6-1 REP4 plate A – Experiment REP4  
Livingstone/roots.tsv

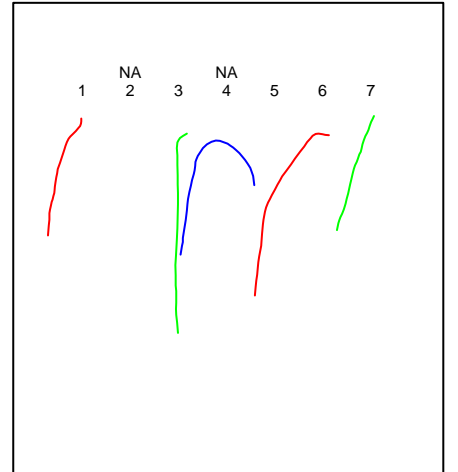

IL6-1 REP4 plate B – Experiment REP4  
Livingstone/roots.tsv

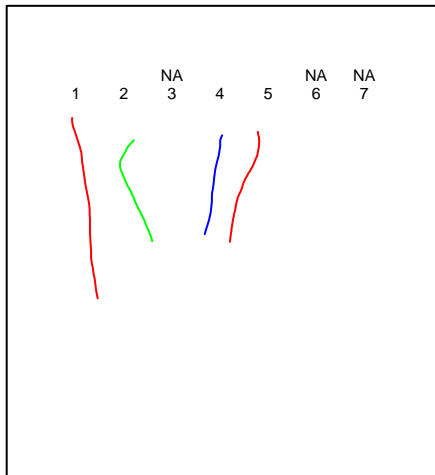

IL6-1 REP5 plate A – Experiment REP5  
Livingstone/roots.tsv

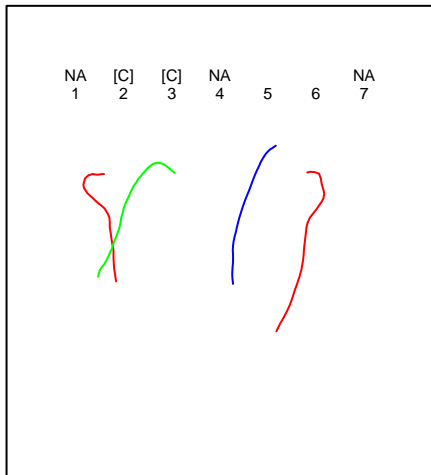

IL6-1 REP5 plate B – Experiment REP5  
Livingstone/roots.tsv

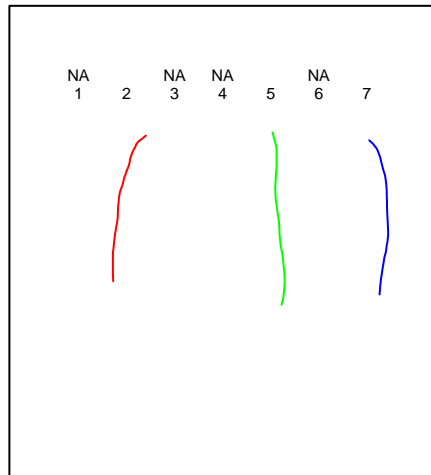

IL6-2 REP3 plate A – Experiment REP3  
Livingstone/roots.tsv

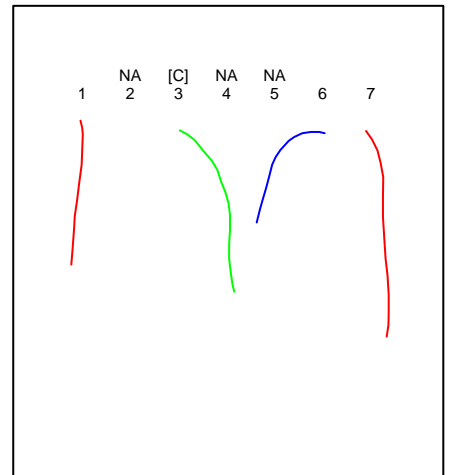

IL6-2 REP3 plate B – Experiment REP3  
Livingstone/roots.tsv

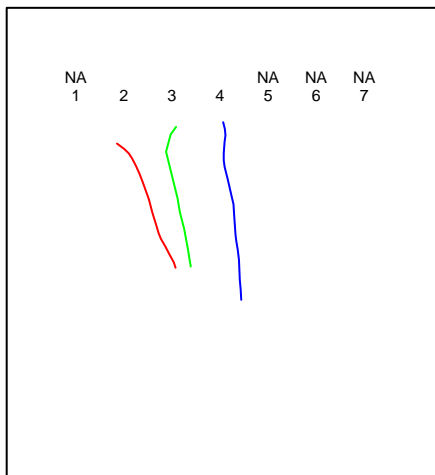

IL6-2 REP4 plate A – Experiment REP4  
Livingstone/roots.tsv

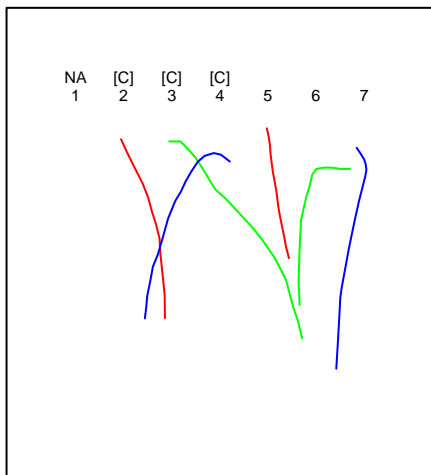

IL6-2 REP4 plate B – Experiment REP4  
Livingstone/roots.tsv

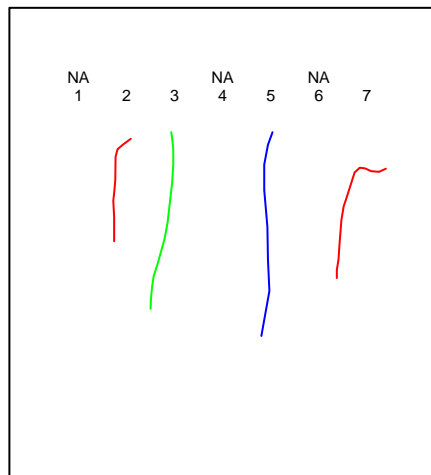

IL6-2 REP5 plate A – Experiment REP5  
Livingstone/roots.tsv

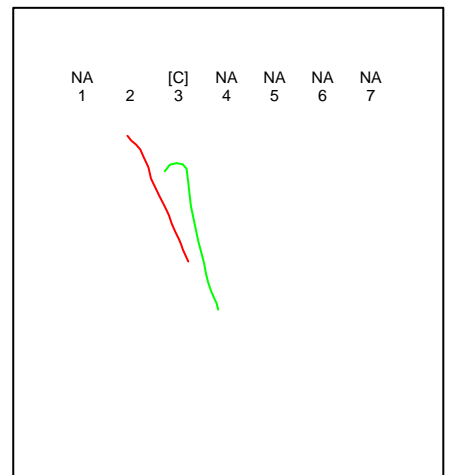

IL6-2 REP5 plate B – Experiment REP5  
Livingstone/roots.tsv

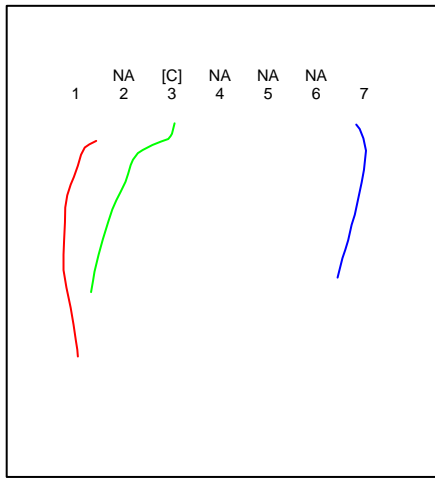

IL6-2 REP2 plate A – Experiment REPN2  
SiobhanMeasurements/Results\_01\_15\_15.tsv

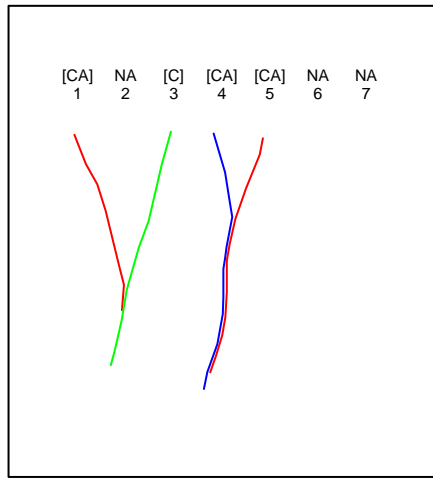

IL6-2 REP2 plate B – Experiment REPN2  
SiobhanMeasurements/Results\_01\_15\_15.tsv

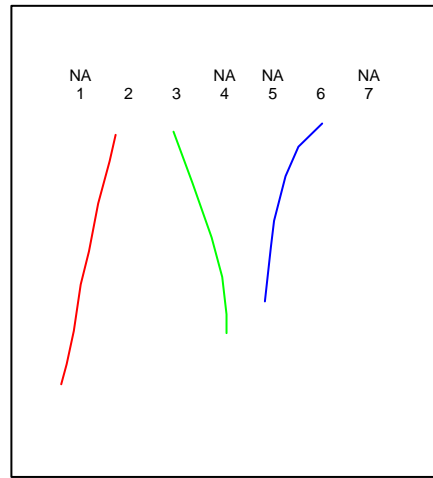

IL6-2 REP3 plate A - Experiment REPN3  
SiobhanMeasurements/Results\_01\_15\_15.tsv

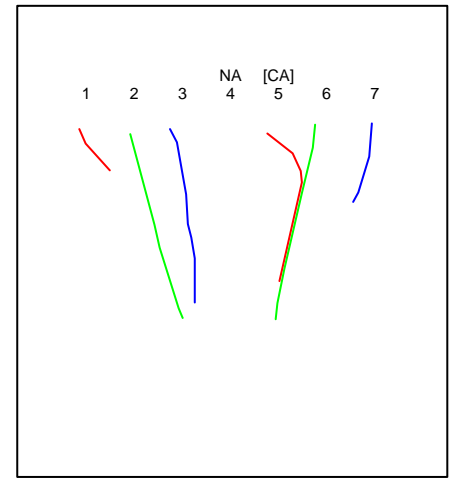

IL6-2 REP3 plate B – Experiment REPN3  
SiobhanMeasurements/Results\_01\_15\_15.tsv

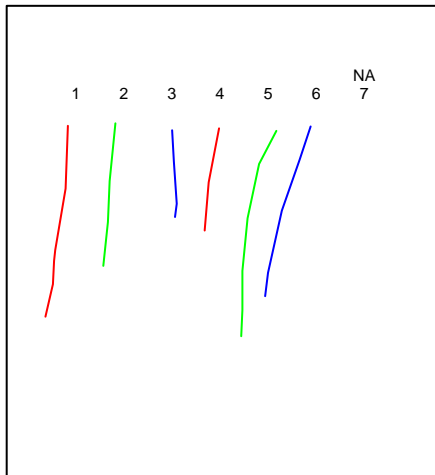

IL6-2 REP4 plate A – Experiment REPN4  
SiobhanMeasurements/Results\_01\_15\_15.tsv

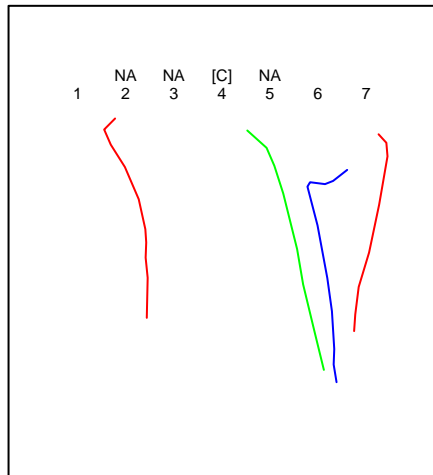

IL6-2 REP4 plate B – Experiment REPN4  
SiobhanMeasurements/Results\_01\_15\_15.tsv

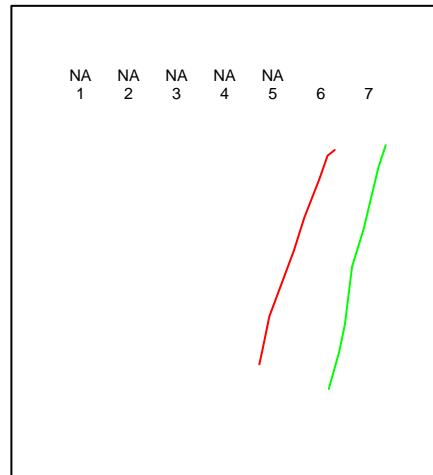

IL6-2 REP5 plate A - Experiment REPN5  
SiobhanMeasurements/Results\_01\_15\_15.tsv

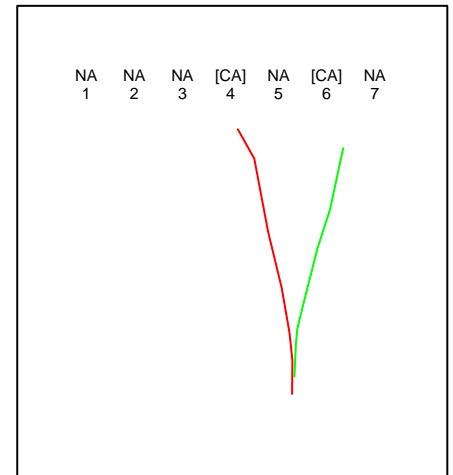

IL6-2 REP5 plate B – Experiment REPN5  
SiobhanMeasurements/Results\_01\_15\_15.tsv

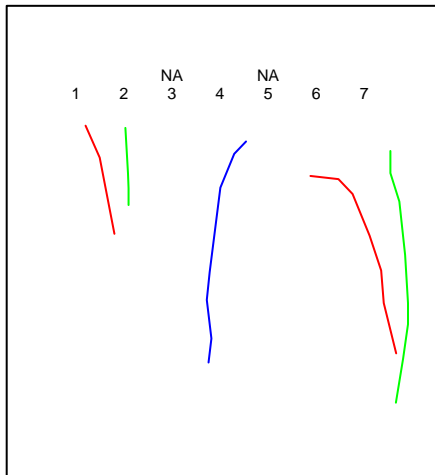

IL6-2 REP5 plate C – Experiment REPN5  
SiobhanMeasurements/Results\_01\_15\_15.tsv

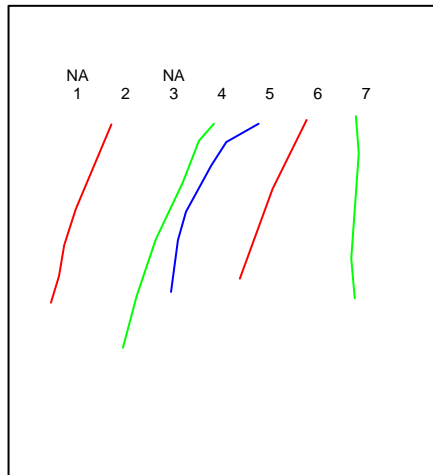

IL6-2 REP5 plate D – Experiment REPN5  
SiobhanMeasurements/Results\_01\_15\_15.tsv

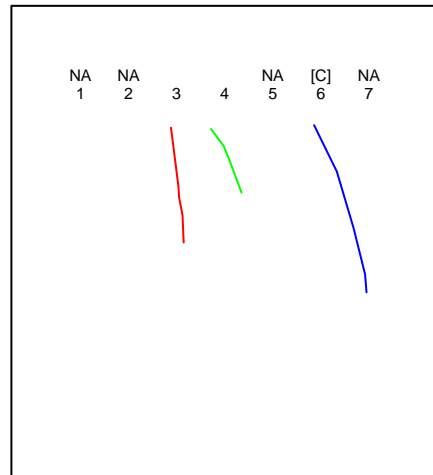

IL6-2 REP5 plate E - Experiment REPN5  
SiobhanMeasurements/Results\_01\_15\_15.tsv

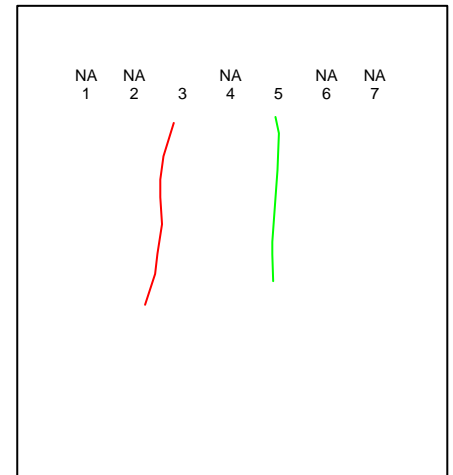

**IL6-3 REP2 plate A – Experiment REP2**  
**Livingstone/roots.tsv**

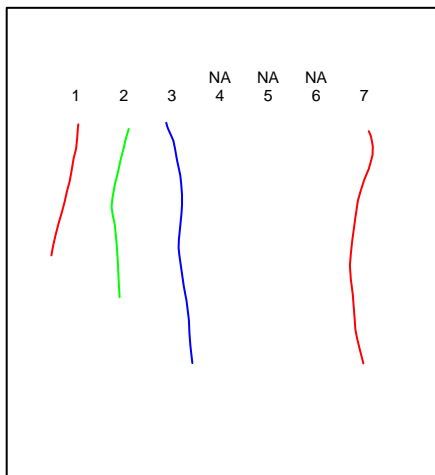

**IL6-3 REP2 plate B – Experiment REP2**  
**Livingstone/roots.tsv**

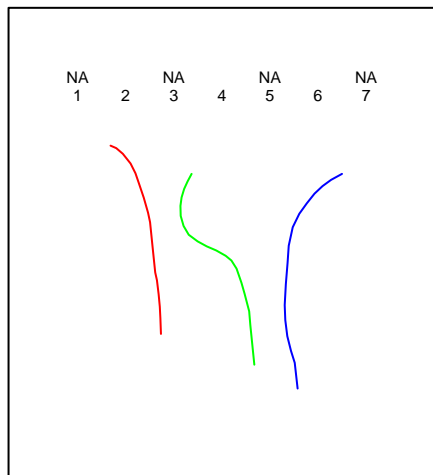

IL6-3 REP3 plate A – Experiment REP3  
Livingstone/roots.tsv

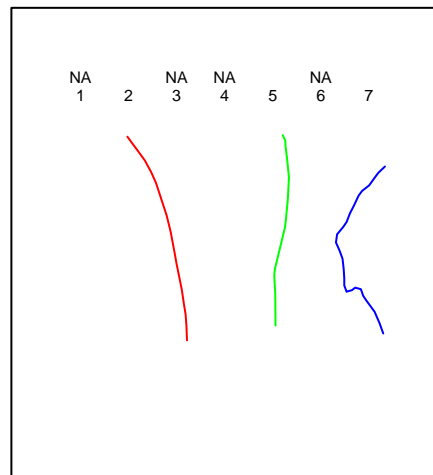

IL6-3 REP3 plate B – Experiment REP3  
Livingstone/roots.tsv

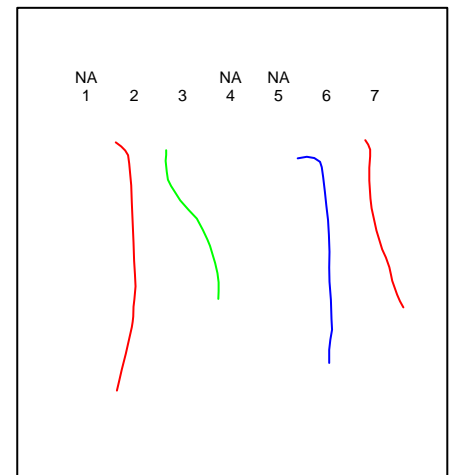

IL6-3 REP4 plate A – Experiment REP4  
Livingstone/roots.tsv

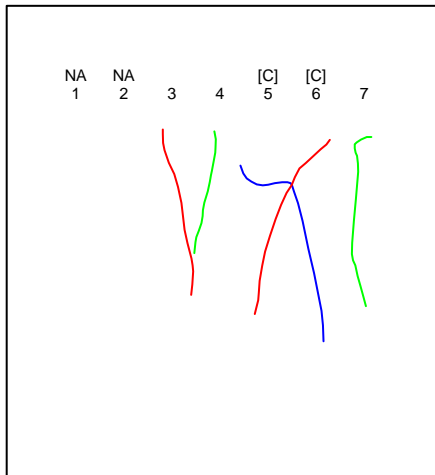

IL6-3 REP4 plate B – Experiment REP4  
Livingstone/roots.tsv

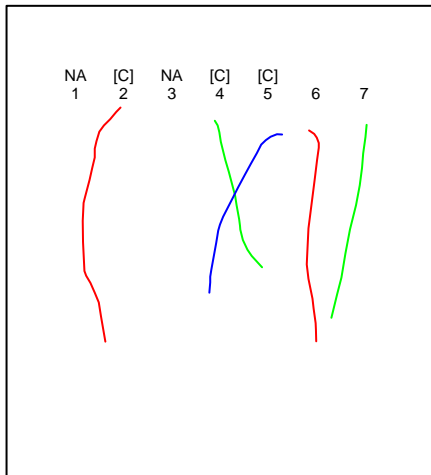

IL6-3 REP5 plate B – Experiment REP5  
Livingstone/roots.tsv

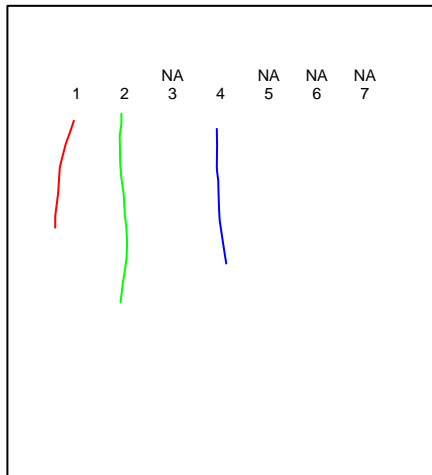

IL6-3 REP3 plate A – Experiment REPX1  
SiobhanMeasurements/Results\_01\_15\_15.tsv

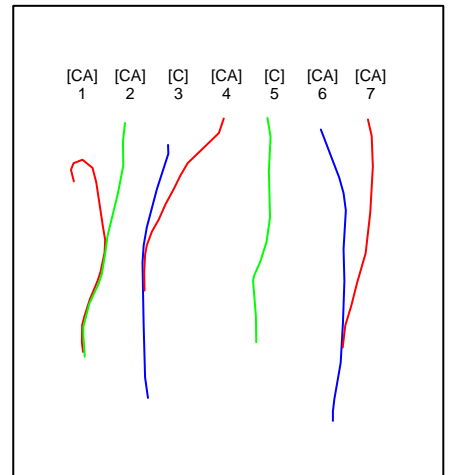

IL6-3 REP3 plate B – Experiment REPX1  
SiobhanMeasurements/Results\_01\_15\_15.tsv

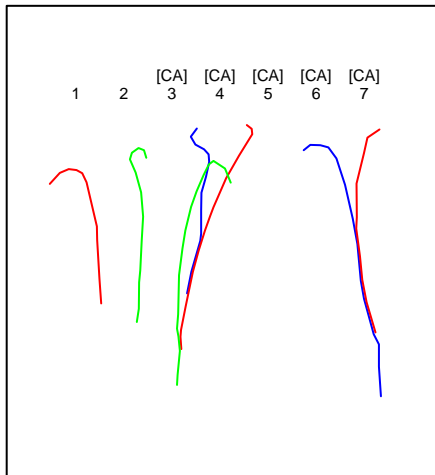

IL6-3 REP3 plate C – Experiment REPX1  
SiobhanMeasurements/Results\_01\_15\_15.tsv

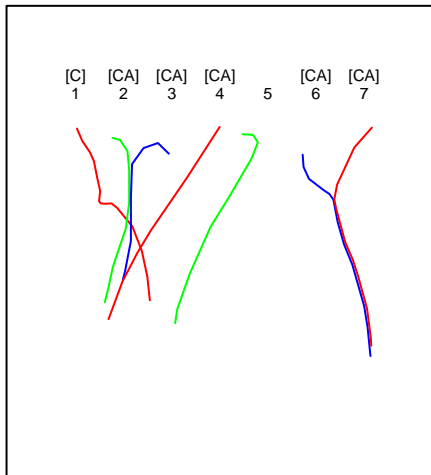

IL6-4 REP2 plate A – Experiment REP2  
SiobhanMeasurements/Siobhan\_Results\_11\_30\_2.tsv

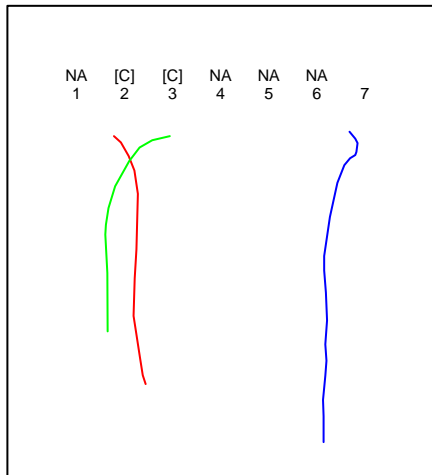

IL6-4 REP2 plate B – Experiment REP2  
SiobhanMeasurements/Siobhan\_Results\_11\_30\_2.tsv

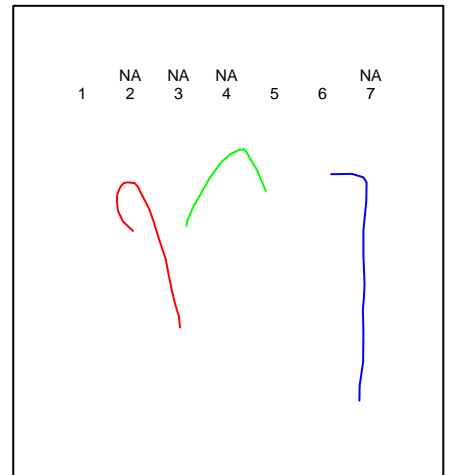

IL6-4 REP3 plate A – Experiment REP3  
SiobhanMeasurements/Siobhan\_Results\_11\_30\_2.tsv

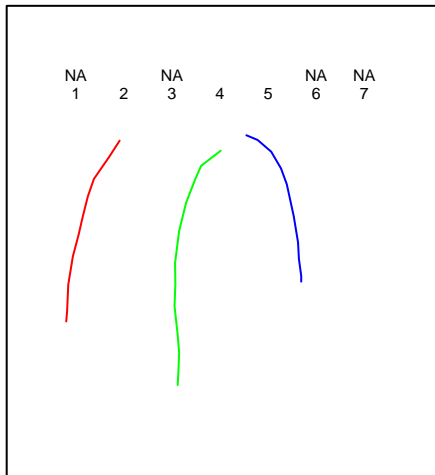

IL6-4 REP3 plate B – Experiment REP3  
SiobhanMeasurements/Siobhan\_Results\_11\_30\_2.tsv

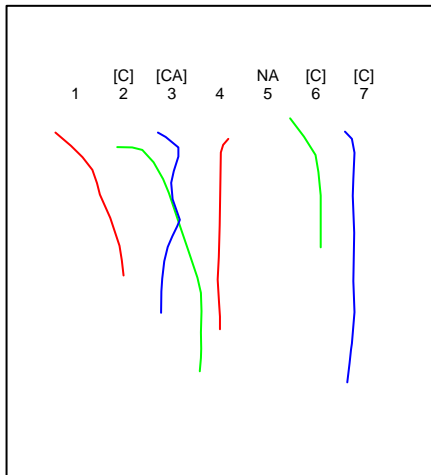

IL6-4 REP4 plate A – Experiment REP4  
SiobhanMeasurements/Siobhan\_Results\_11\_30\_2.tsv

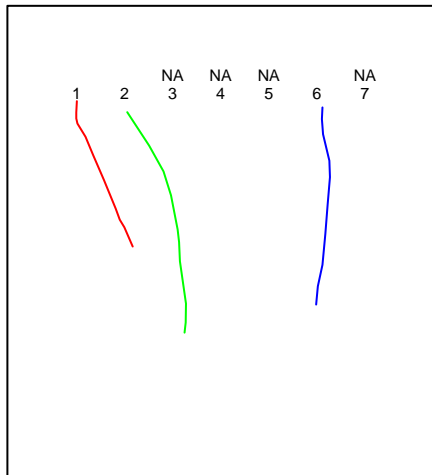

IL6-4 REP4 plate B – Experiment REP4  
SiobhanMeasurements/Siobhan\_Results\_11\_30\_2.tsv

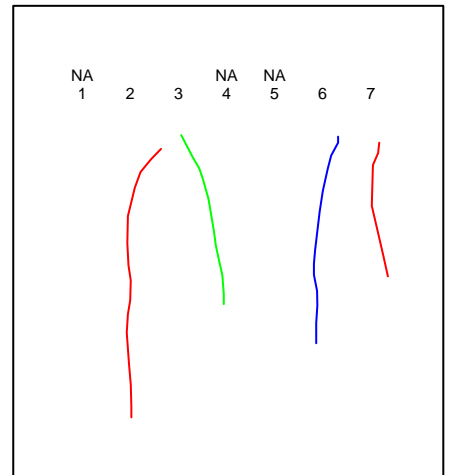

IL6-4 REP5 plate A – Experiment REP5  
SiobhanMeasurements/Siobhan\_Results\_11\_30\_2.tsv

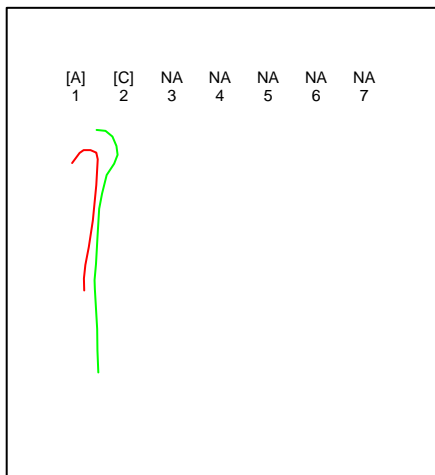

IL6-4 REP5 plate B – Experiment REP5  
SiobhanMeasurements/Siobhan\_Results\_11\_30\_2.tsv

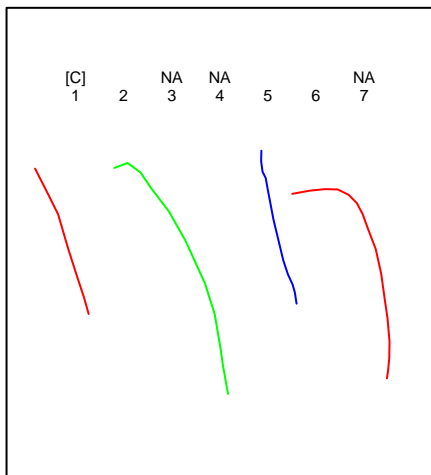

IL7-1 REP2 plate A – Experiment REP2  
Livingstone/roots.tsv

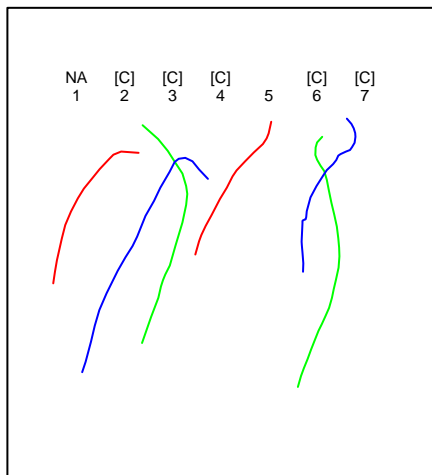

IL7-1 REP2 plate B – Experiment REP2  
Livingstone/roots.tsv

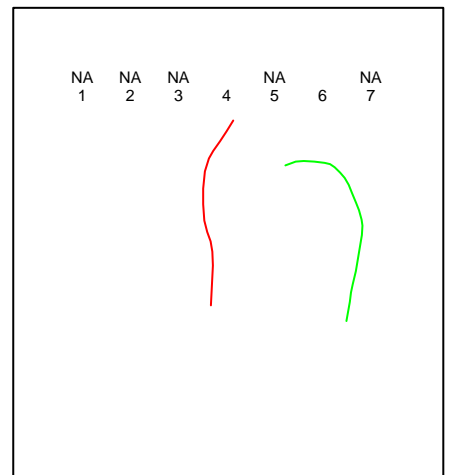

IL7-1 REP3 plate A – Experiment REP3  
Livingstone/roots.tsv

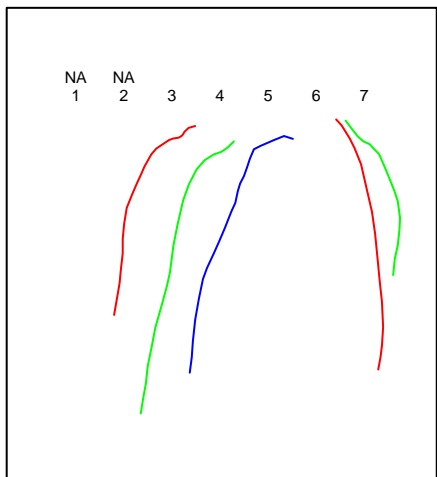

IL7-1 REP3 plate B – Experiment REP3  
Livingstone/roots.tsv

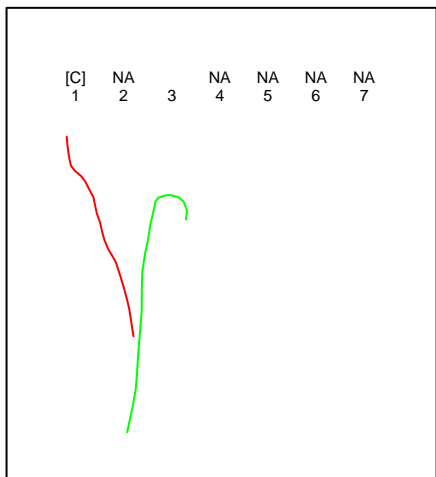

IL7-1 REP4 plate A – Experiment REP4  
SiobhanMeasurements/Results\_1\_1\_15.tsv

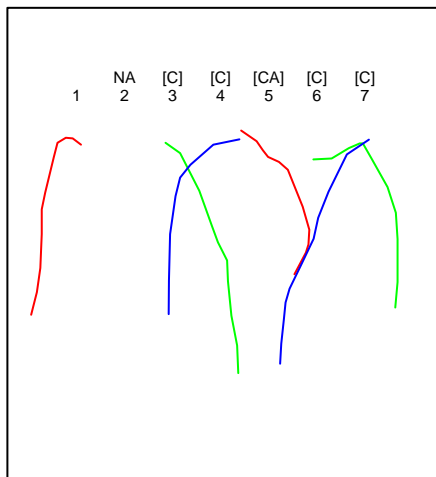

IL7-1 REP4 plate B – Experiment REP4  
SiobhanMeasurements/Results\_1\_1\_15.tsv

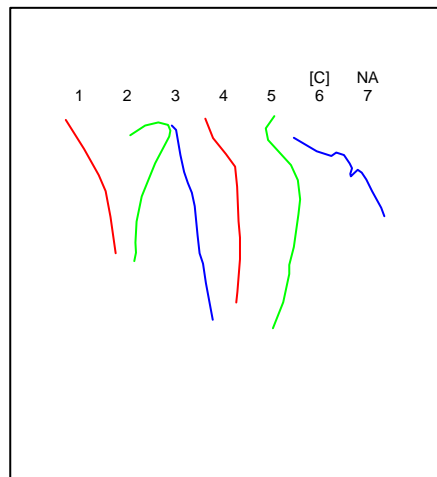

IL7-1 REP5 plate A – Experiment REP5  
SiobhanMeasurements/Results\_1\_1\_15.tsv

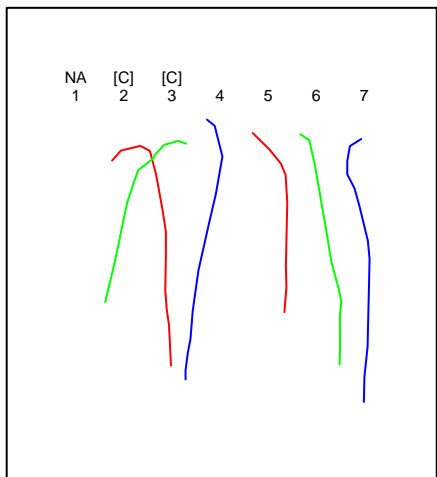

IL7-1 REP5 plate B – Experiment REP5  
SiobhanMeasurements/Results\_1\_1\_15.tsv

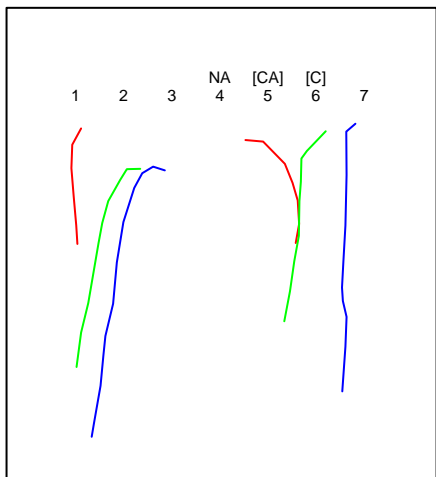

IL7-1 REP5 plate C – Experiment REP5  
SiobhanMeasurements/Results\_1\_1\_15.tsv

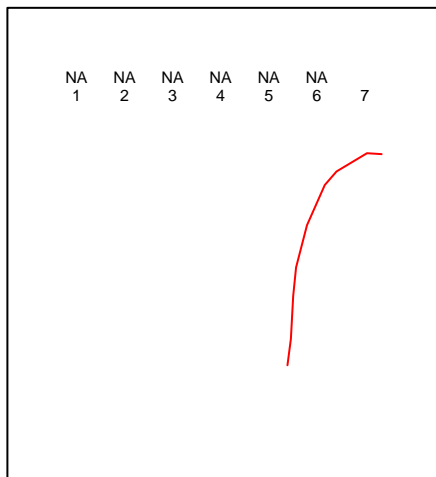

IL7-2 REP2 plate A – Experiment REP2  
SiobhanMeasurements/Results\_12\_29\_14.tsv

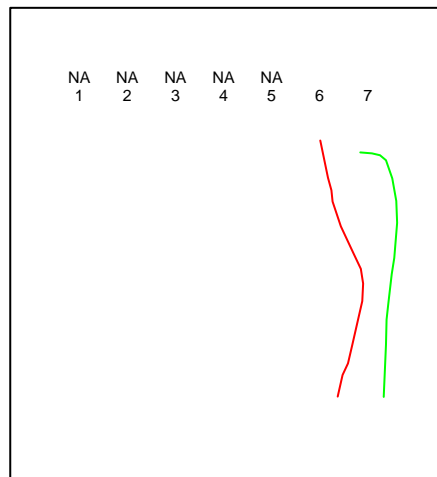

IL7-2 REP2 plate B – Experiment REP2  
SiobhanMeasurements/Results\_12\_29\_14.tsv

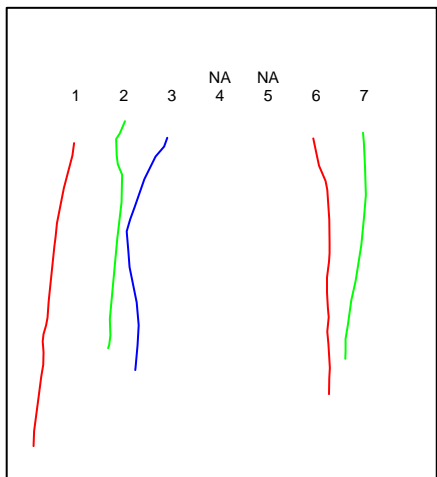

IL7-2 REP3 plate A – Experiment REP3  
SiobhanMeasurements/Results\_12\_29\_14.tsv

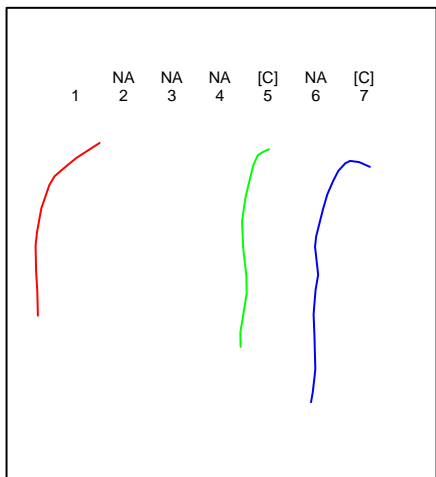

IL7-2 REP3 plate B – Experiment REP3  
SiobhanMeasurements/Results\_12\_29\_14.tsv

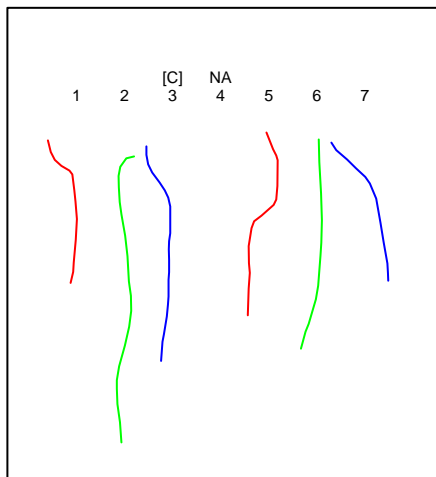

IL7-2 REP4 plate A – Experiment REP4  
SiobhanMeasurements/Results\_12\_29\_14.tsv

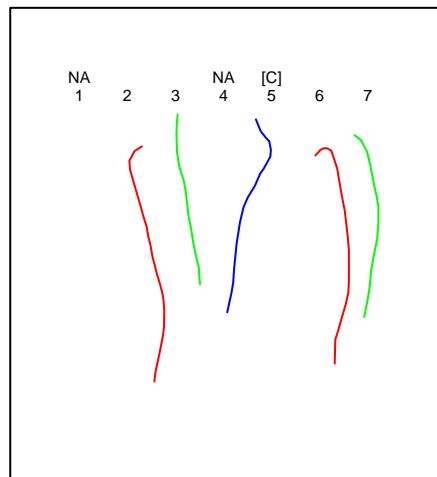

IL7-2 REP4 plate B – Experiment REP4  
SiobhanMeasurements/Results\_12\_29\_14.tsv

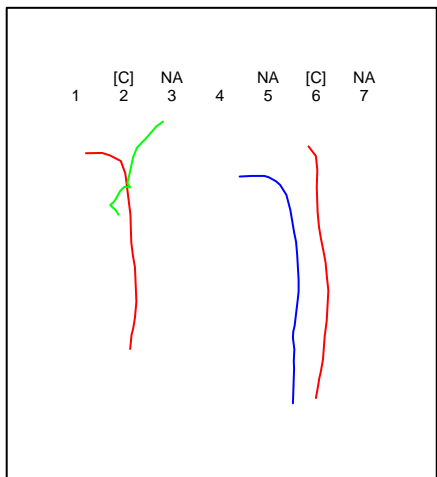

IL7-2 REP5 plate A – Experiment REP5  
SiobhanMeasurements/Results\_12\_29\_14.tsv

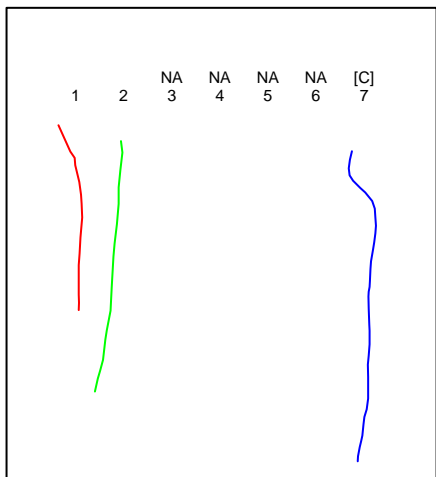

IL7-2 REP5 plate B – Experiment REP5  
SiobhanMeasurements/Results\_12\_29\_14.tsv

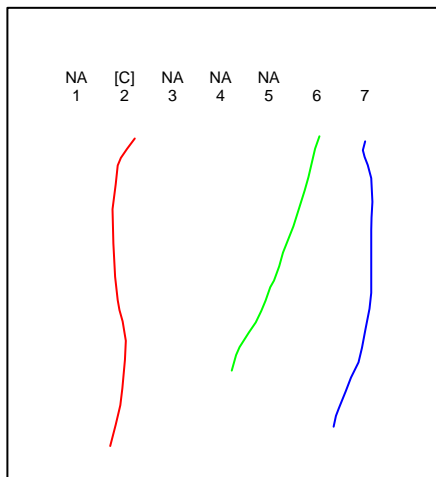

IL7-3 REP2 plate A – Experiment REP2  
SiobhanMeasurements/Results\_1\_1\_15.tsv

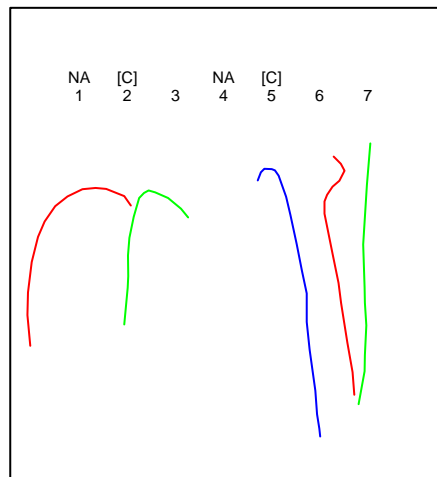

IL7-3 REP2 plate B – Experiment REP2  
SiobhanMeasurements/Results\_1\_1\_15.tsv

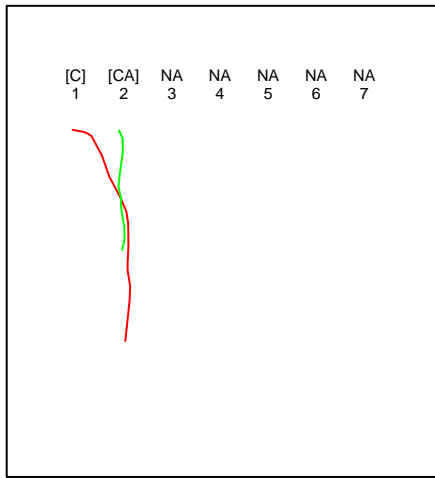

IL7-3 REP3 plate A – Experiment REP3  
SiobhanMeasurements/Results\_1\_1\_15.tsv

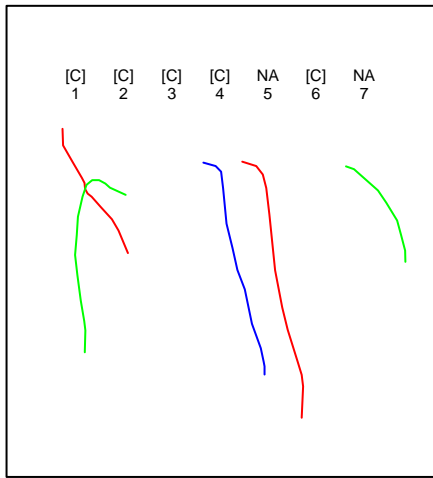

IL7-3 REP3 plate B – Experiment REP3  
SiobhanMeasurements/Results\_1\_1\_15.tsv

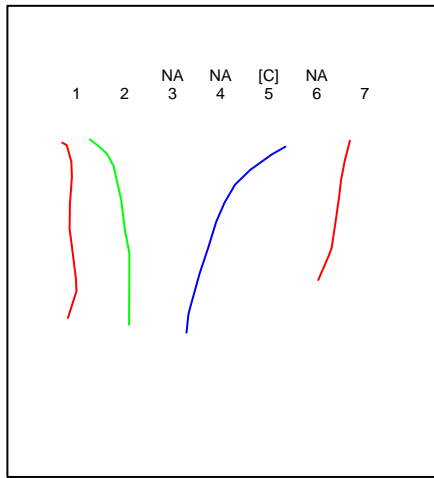

IL7-3 REP4 plate A – Experiment REP4  
SiobhanMeasurements/Results\_1\_1\_15.tsv

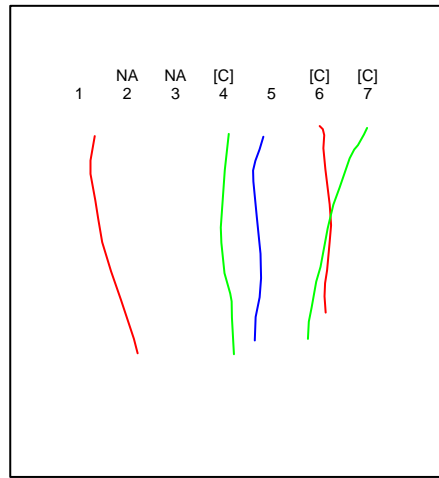

IL7-3 REP4 plate B – Experiment REP4  
SiobhanMeasurements/Results\_1\_1\_15.tsv

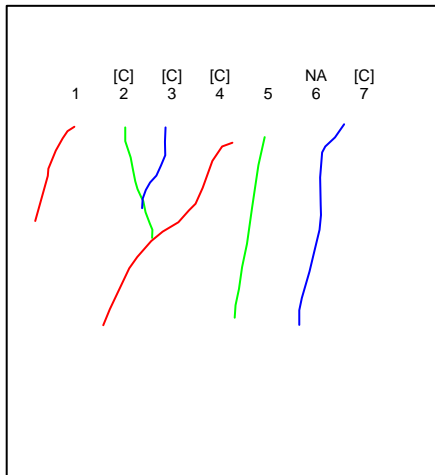

IL7-3 REP5 plate A – Experiment REP5  
SiobhanMeasurements/Results\_1\_1\_15.tsv

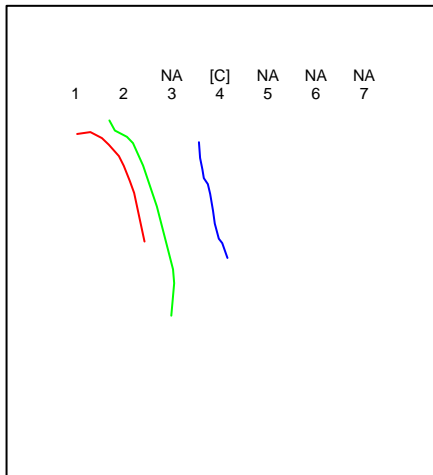

IL7-3 REP5 plate B – Experiment REP5  
SiobhanMeasurements/Results\_1\_1\_15.tsv

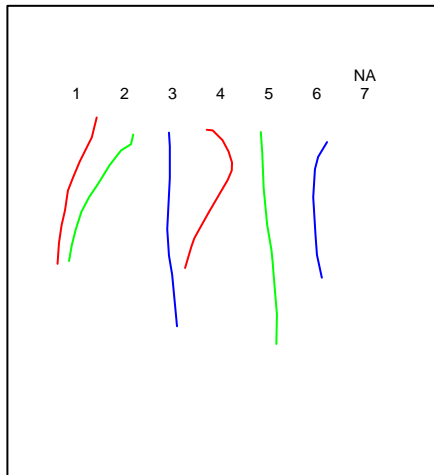

IL7-4 REP2 plate A – Experiment REP2  
SiobhanMeasurements/Results\_1\_1\_15.tsv

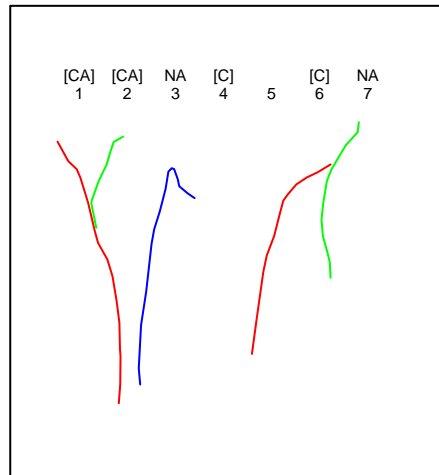

IL7-4 REP2 plate B – Experiment REP2  
SiobhanMeasurements/Results\_1\_1\_15.tsv

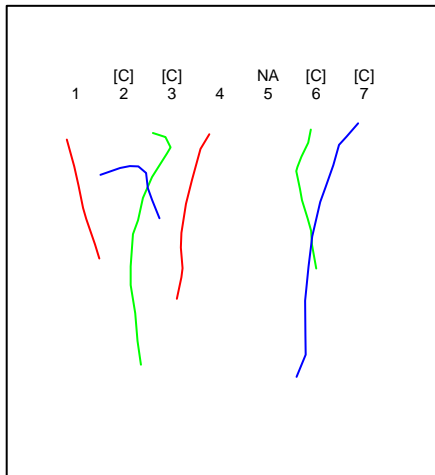

IL7-4 REP3 plate A – Experiment REP3  
SiobhanMeasurements/Results\_1\_1\_15.tsv

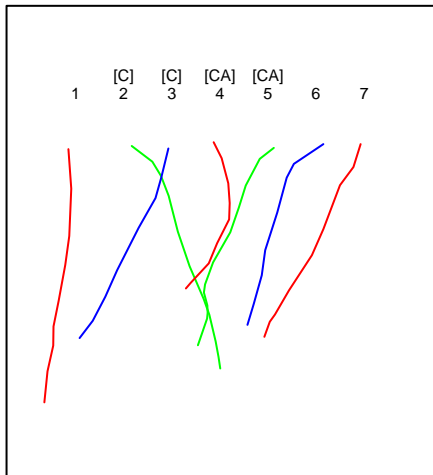

IL7-4 REP3 plate B – Experiment REP3  
SiobhanMeasurements/Results\_1\_1\_15.tsv

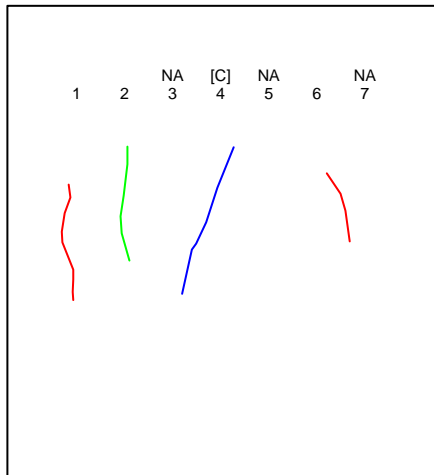

IL7-4 REP4 plate A – Experiment REP4  
SiobhanMeasurements/Results\_1\_1\_15.tsv

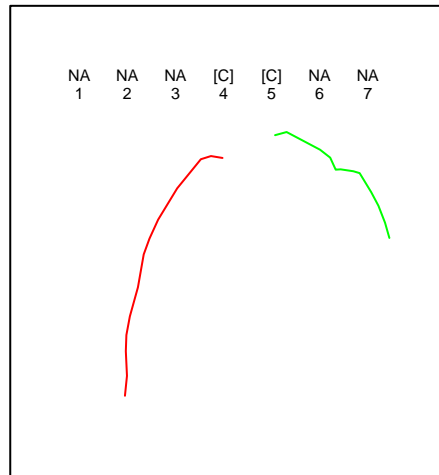

IL7-4 REP4 plate B – Experiment REP4  
SiobhanMeasurements/Results\_1\_1\_15.tsv

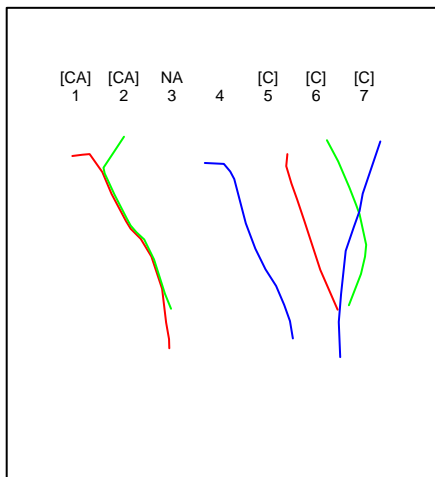

IL7-4 REP5 plate A – Experiment REP5  
SiobhanMeasurements/Results\_1\_1\_15.tsv

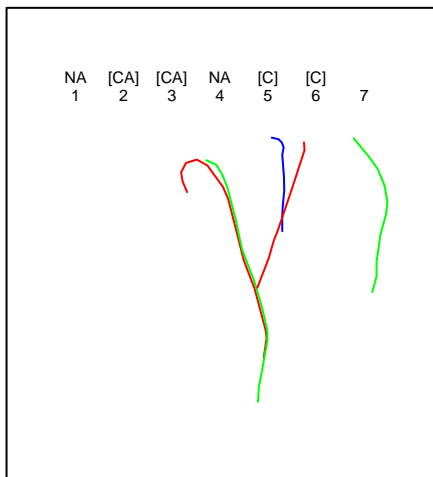

IL7-4 REP5 plate B – Experiment REP5  
SiobhanMeasurements/Results\_1\_1\_15.tsv

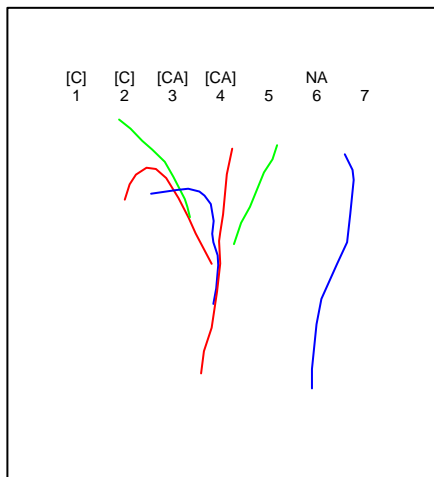

IL7-4 REP5 plate C – Experiment REP5  
SiobhanMeasurements/Results\_1\_1\_15.tsv

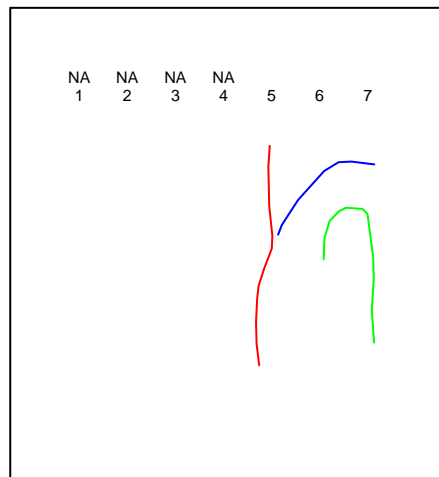

IL7-4-1 REP2 plate A – Experiment REP2  
Livingstone/roots.tsv

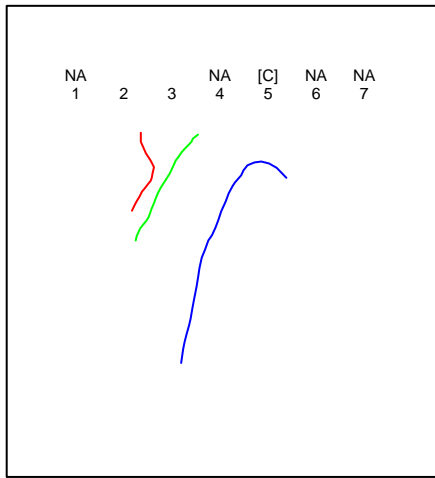

IL7-4-1 REP2 plate B – Experiment REP2  
Livingstone/roots.tsv

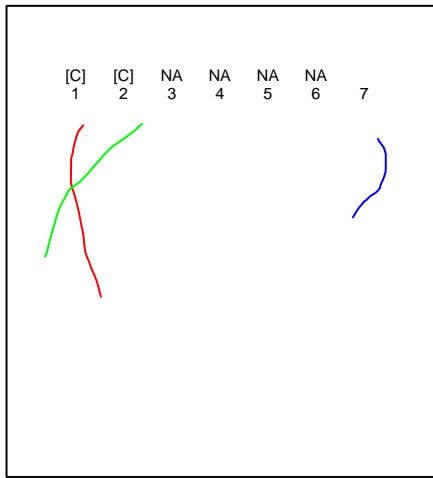

IL7-4-1 REP3 plate A – Experiment REP3  
Livingstone/roots.tsv

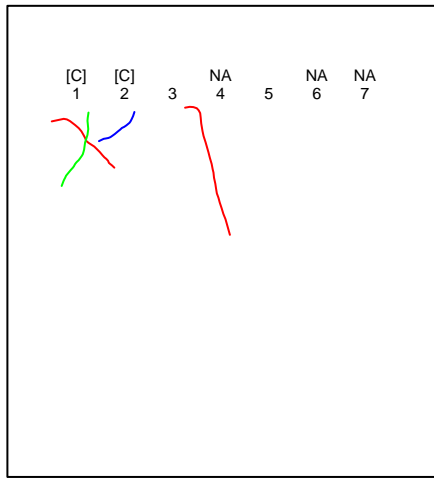

IL7-4-1 REP3 plate B – Experiment REP3  
Livingstone/roots.tsv

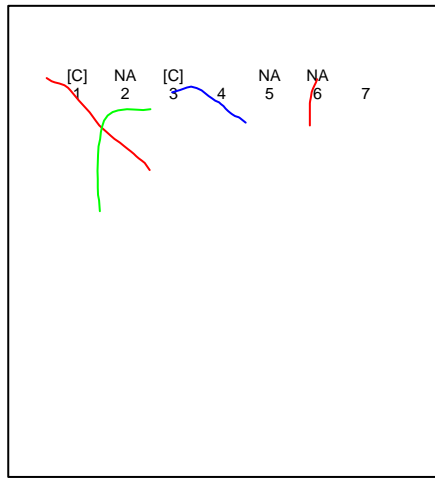

**IL7-4-1 REP4 plate A – Experiment REP4**  
**Livingstone/roots.tsv**

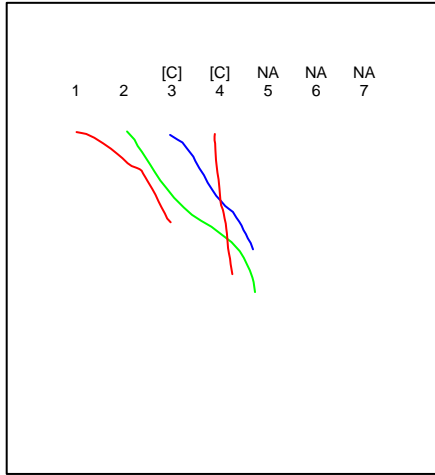

IL7-4-1 REP4 plate B – Experiment REP4  
Livingstone/roots.tsv

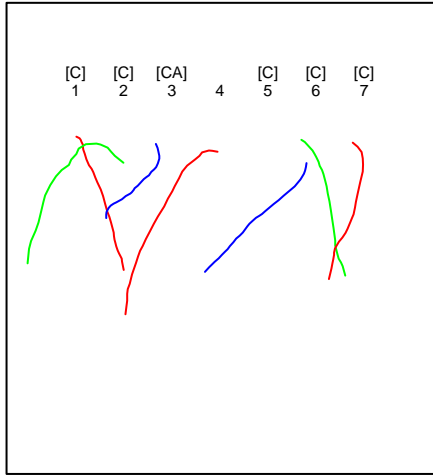

**IL7-4-1 REP5 plate B – Experiment REP5**  
**Livingstone/roots.tsv**

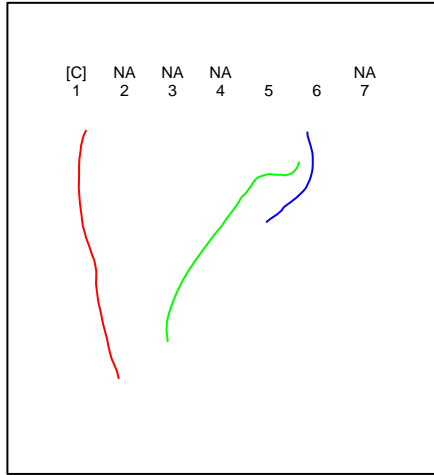

IL7-4-1 REP5 plate A - Experiment REPX1  
SiobhanMeasurements/Results\_1\_1\_15.tsv

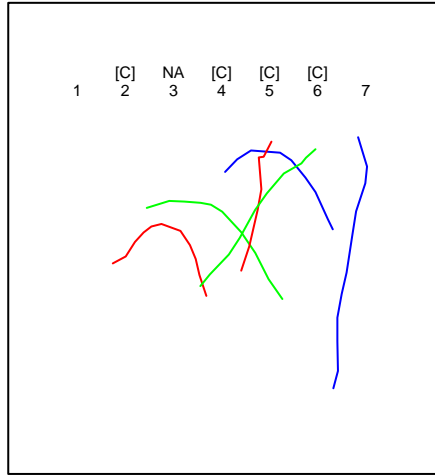

IL7-4-1 REP5 plate B – Experiment REPX1  
SiobhanMeasurements/Results\_1\_1\_15.tsv

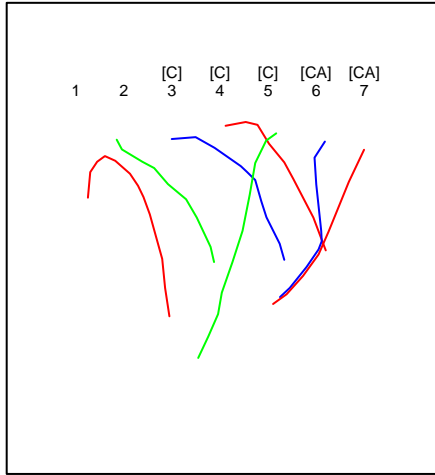

IL7-5 REP2 plate A – Experiment REP2  
Livingstone/roots.tsv

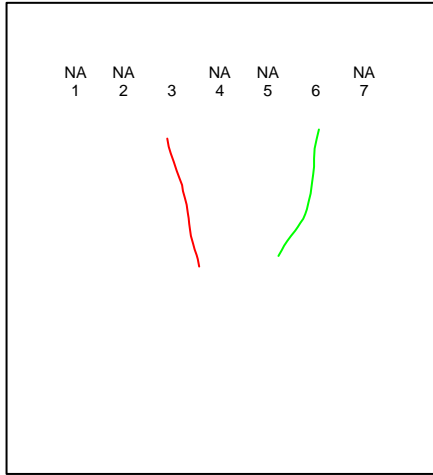

IL7-5 REP2 plate B – Experiment REP2  
Livingstone/roots.tsv

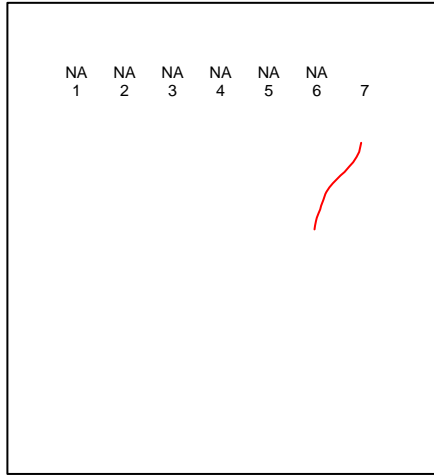

IL7-5 REP2 plate D – Experiment REP2  
Livingstone/roots.tsv

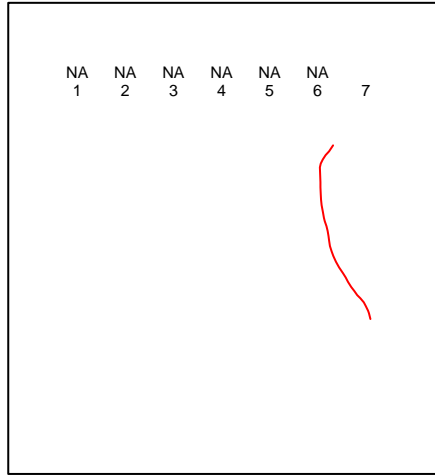

IL7-5 REP3 plate C – Experiment REP3  
Livingstone/roots.tsv

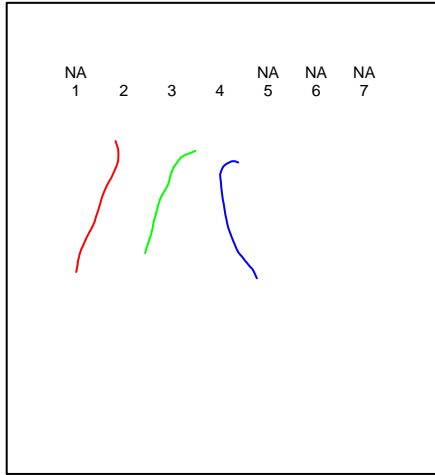

IL7-5 REP3 plate D – Experiment REP3  
Livingstone/roots.tsv

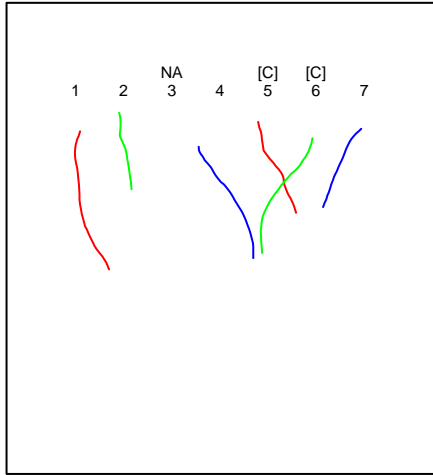

IL7-5 REP4 plate A – Experiment REP4  
Livingstone/roots.tsv

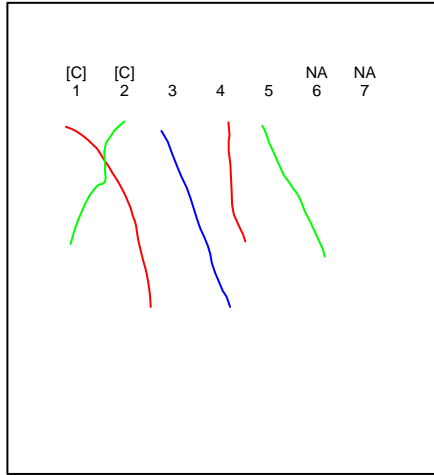

IL7-5 REP4 plate B – Experiment REP4  
Livingstone/roots.tsv

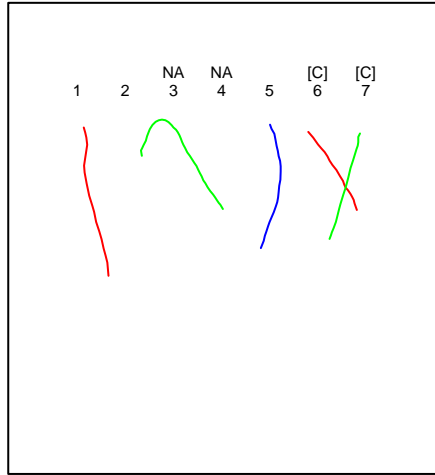

IL7-5 REP5 plate A – Experiment REP5  
Livingstone/roots.tsv

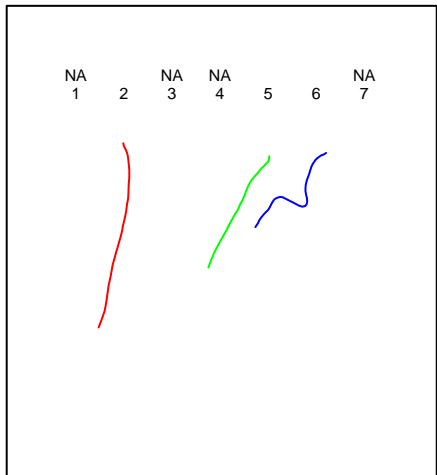

IL7-5 REP5 plate B – Experiment REP5  
Livingstone/roots.tsv

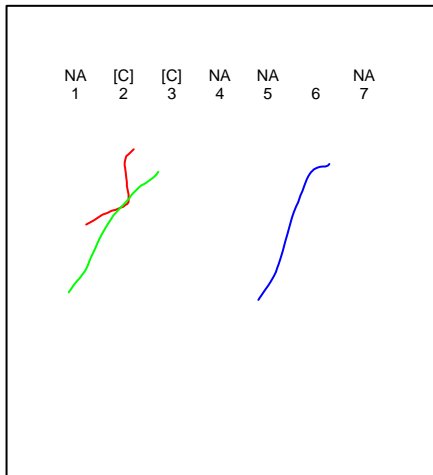

IL7-5-1 REP4 plate A – Experiment REP4  
SiobhanMeasurements/Results\_1\_1\_15.tsv

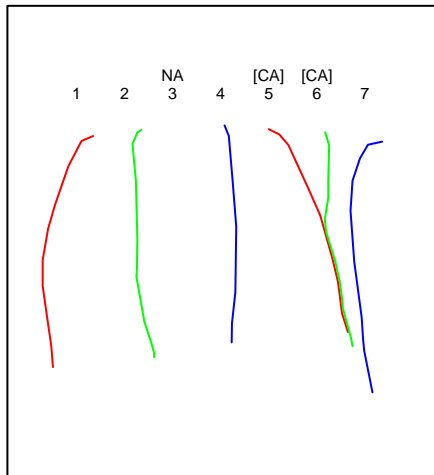

IL7-5-1 REP4 plate B – Experiment REP4  
SiobhanMeasurements/Results\_1\_1\_15.tsv

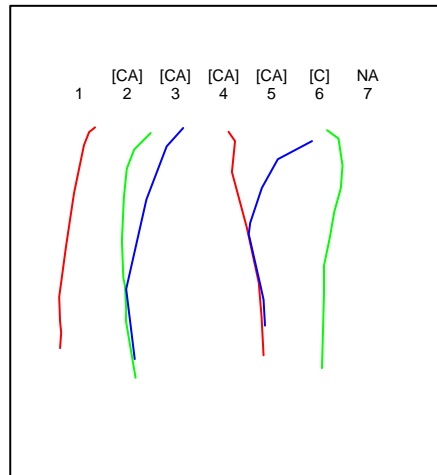

IL7-5-1 REP5 plate A – Experiment REP5  
SiobhanMeasurements/Results\_1\_1\_15.tsv

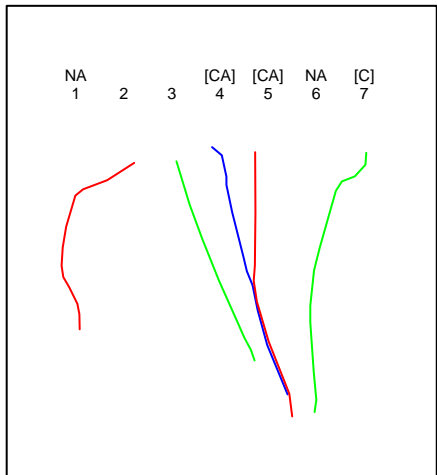

IL7-5-1 REP5 plate B – Experiment REP5  
SiobhanMeasurements/Results\_1\_1\_15.tsv

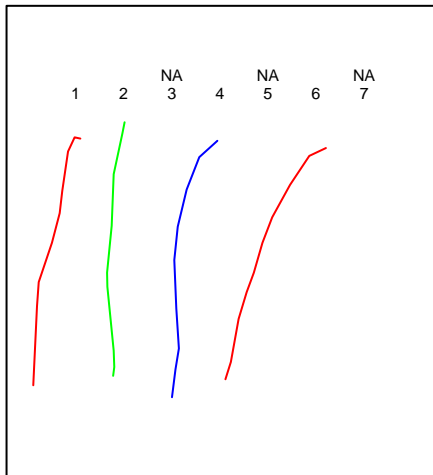

IL7-5-1 UNKN plate A – Experiment REPX1  
SiobhanMeasurements/Results\_1\_1\_15.tsv

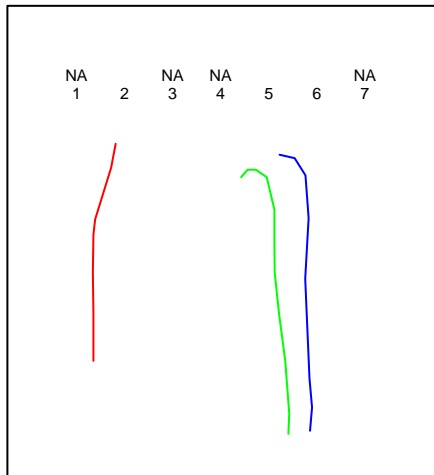

IL7-5-1 UNKN plate B – Experiment REPX1  
SiobhanMeasurements/Results\_1\_1\_15.tsv

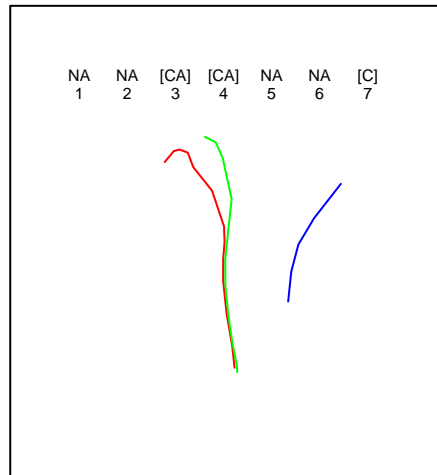

IL7-5-1 UNKN plate A – Experiment REPX2  
SiobhanMeasurements/Results\_1\_1\_15.tsv

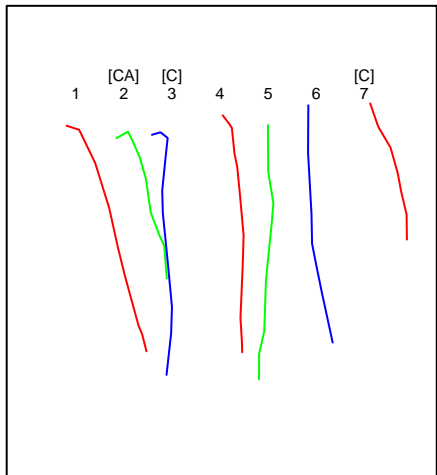

IL7-5-1 UNKN plate B – Experiment REPX2  
SiobhanMeasurements/Results\_1\_1\_15.tsv

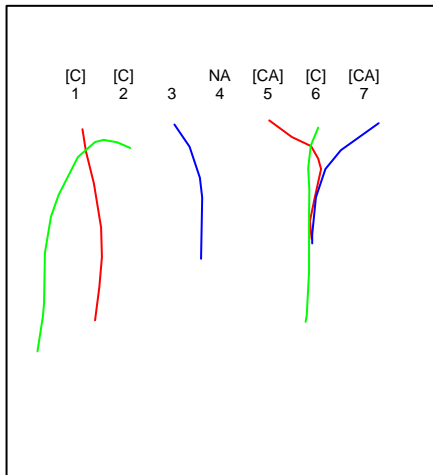

IL7-5-1 UNKN plate C – Experiment REPX2  
SiobhanMeasurements/Results\_1\_1\_15.tsv

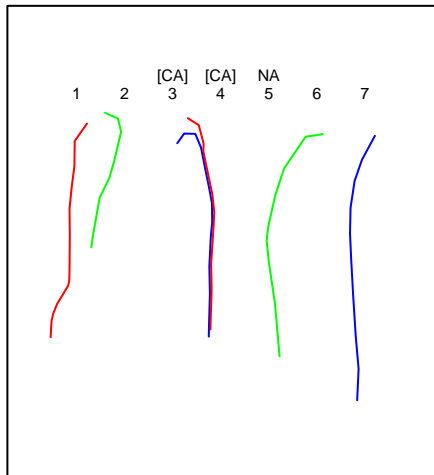

IL7-5-1 UNKN plate A – Experiment REPX3  
SiobhanMeasurements/Results\_1\_1\_15.tsv

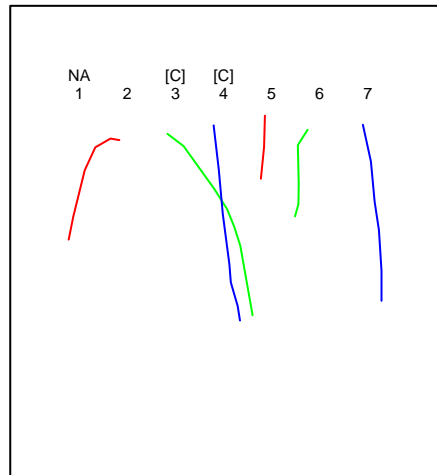

IL7-5-1 UNKN plate B – Experiment REPX3  
SiobhanMeasurements/Results\_1\_1\_15.tsv

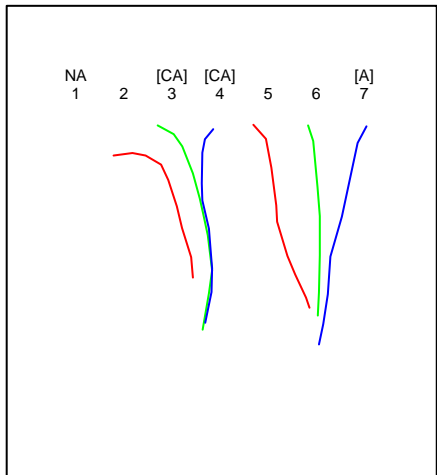

IL7-5-1 UNKN plate C – Experiment REPX3  
SiobhanMeasurements/Results\_1\_1\_15.tsv

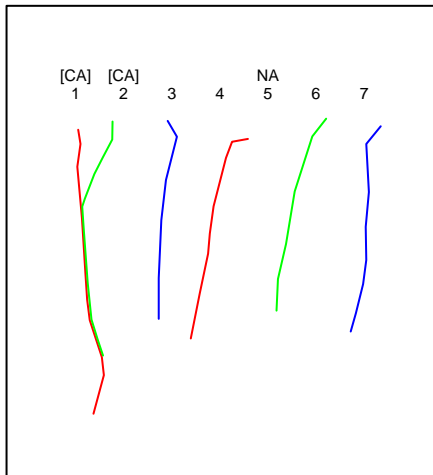

IL7-5-5 REP2 plate A – Experiment REP2  
SiobhanMeasurements/Siobhan\_Results\_12\_01.tsv

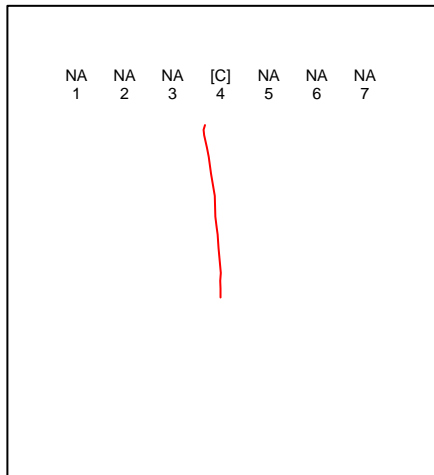

IL7-5-5 REP2 plate B – Experiment REP2  
SiobhanMeasurements/Siobhan\_Results\_12\_01.tsv

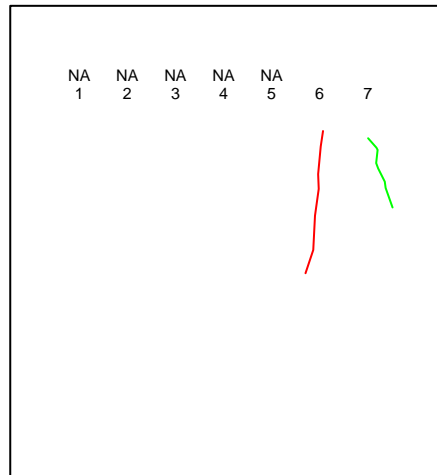

IL7-5-5 REP3 plate A – Experiment REP3  
SiobhanMeasurements/Siobhan\_Results\_12\_01.tsv

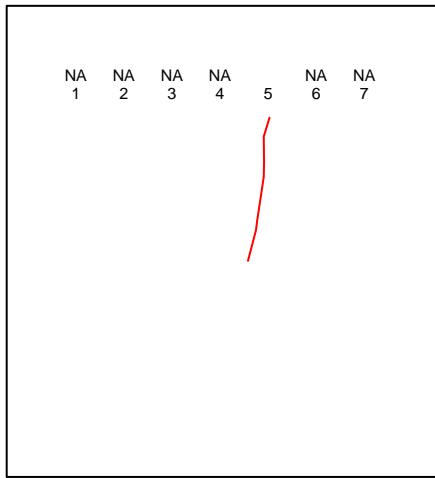

IL7-5-5 REP3 plate B – Experiment REP3  
SiobhanMeasurements/Siobhan\_Results\_12\_01.tsv

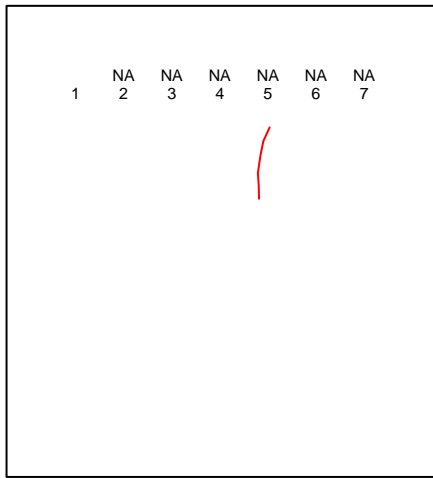

IL7-5-5 REP4 plate A – Experiment REP4  
SiobhanMeasurements/Siobhan\_Results\_12\_01.tsv

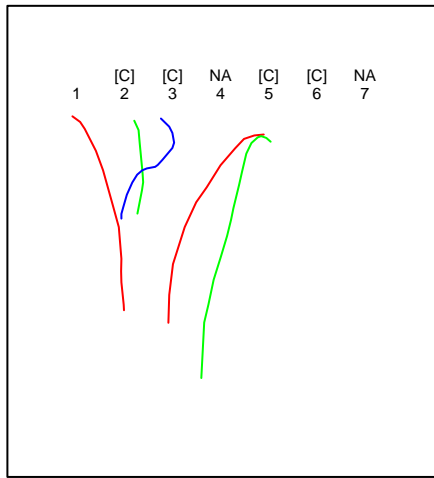

IL7-5-5 REP4 plate B – Experiment REP4  
SiobhanMeasurements/Siobhan\_Results\_12\_01.tsv

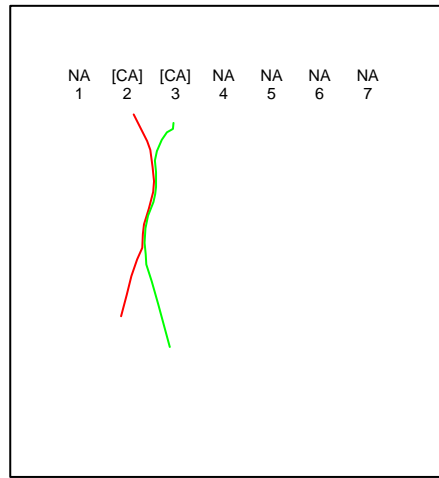

IL7-5-5 REP5 plate A – Experiment REP5  
SiobhanMeasurements/Siobhan\_Results\_12\_01.tsv

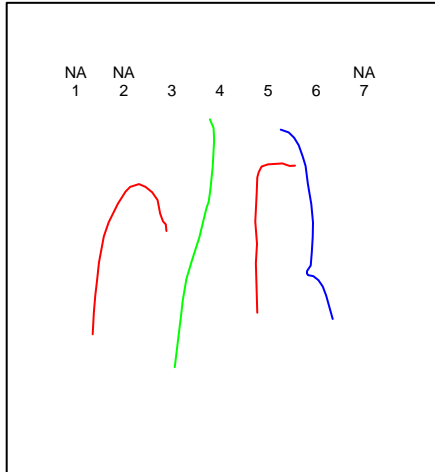

IL7-5-5 REP5 plate B – Experiment REP5  
SiobhanMeasurements/Siobhan\_Results\_12\_01.tsv

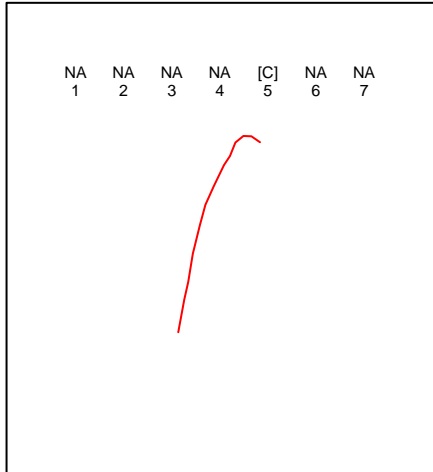

IL7-5-5 REP3 plate A – Experiment REPX1  
SiobhanMeasurements/Siobhan\_Results\_12\_01.tsv

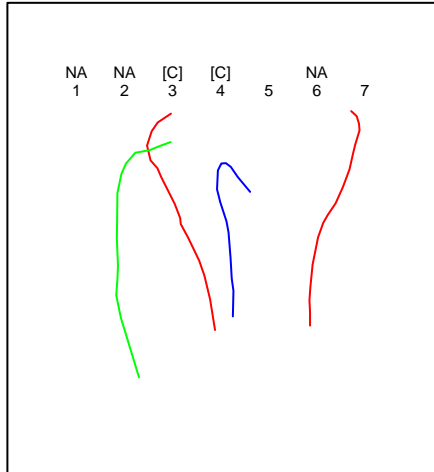

IL7-5-5 REP3 plate B – Experiment REPX1  
SiobhanMeasurements/Siobhan\_Results\_12\_01.tsv

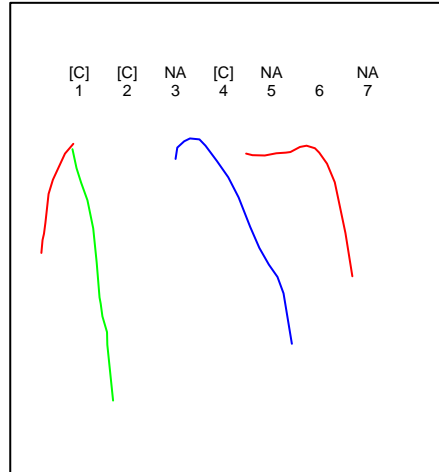

IL7-5-5 UNKN plate A – Experiment REPX2  
SiobhanMeasurements/Siobhan\_Results\_12\_01.tsv

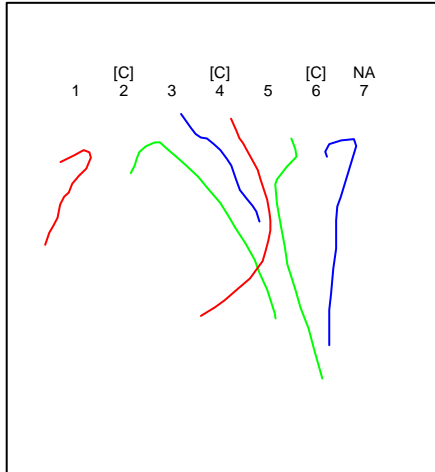

IL7-5-5 UNKN plate B – Experiment REPX2  
SiobhanMeasurements/Siobhan\_Results\_12\_01.tsv

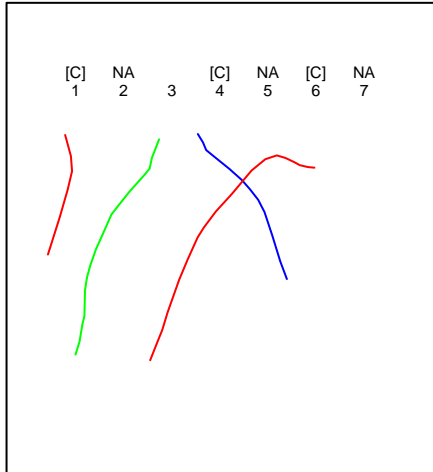

IL7-5-5 UNKN plate C – Experiment REPX2  
SiobhanMeasurements/Siobhan\_Results\_12\_01.tsv

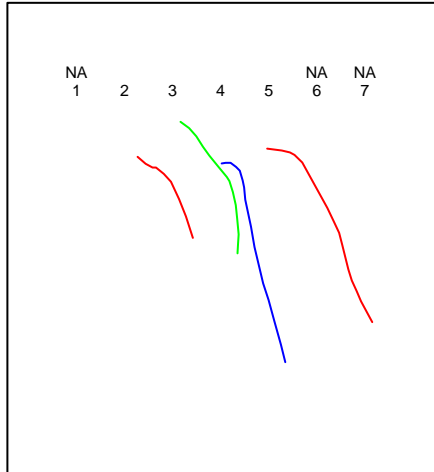

IL7-5-P5 REP2 plate A – Experiment REP2  
SiobhanMeasurements/Results\_12\_27\_14.tsv

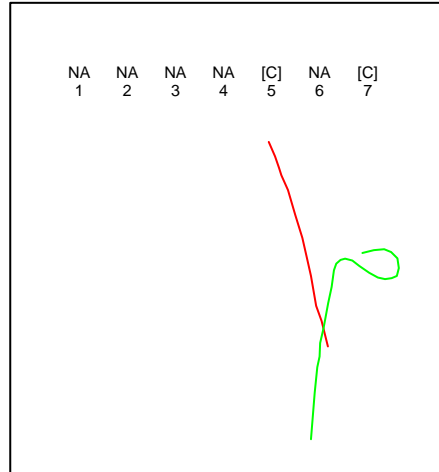

IL7-5-P5 REP2 plate B – Experiment REP2  
SiobhanMeasurements/Results\_12\_27\_14.tsv

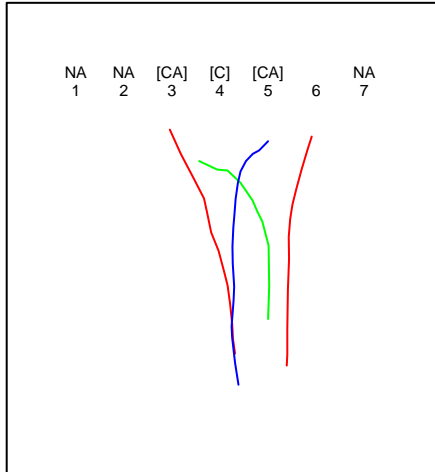

IL7-5-P5 REP3 plate A – Experiment REP3  
SiobhanMeasurements/Results\_12\_27\_14.tsv

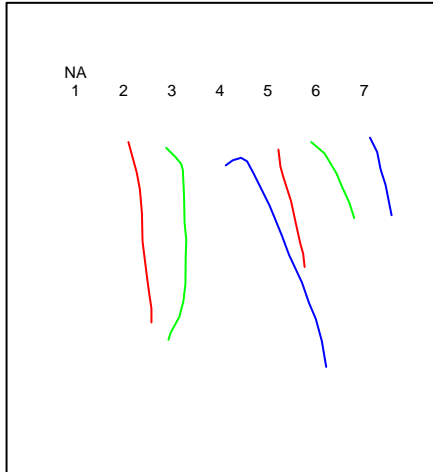

IL7-5-P5 REP3 plate B – Experiment REP3  
SiobhanMeasurements/Results\_12\_27\_14.tsv

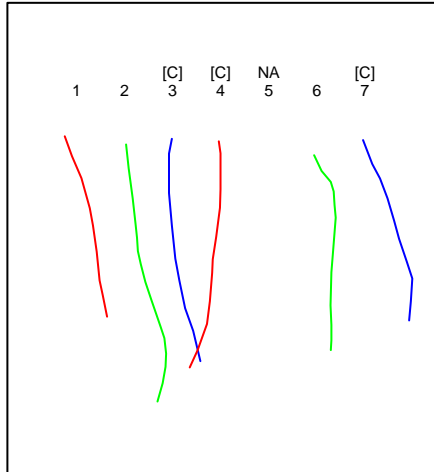

IL7-5-P5 REP4 plate A – Experiment REP4  
SiobhanMeasurements/Results\_12\_27\_14.tsv

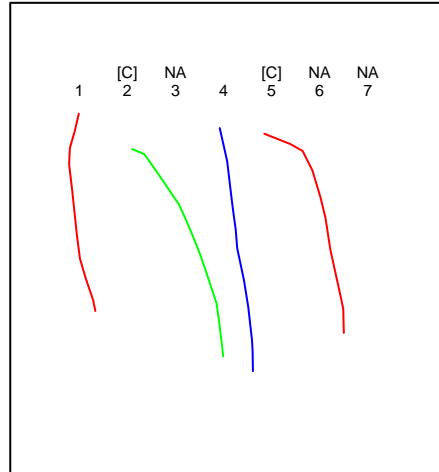

IL7-5-P5 REP4 plate B – Experiment REP4  
SiobhanMeasurements/Results\_12\_27\_14.tsv

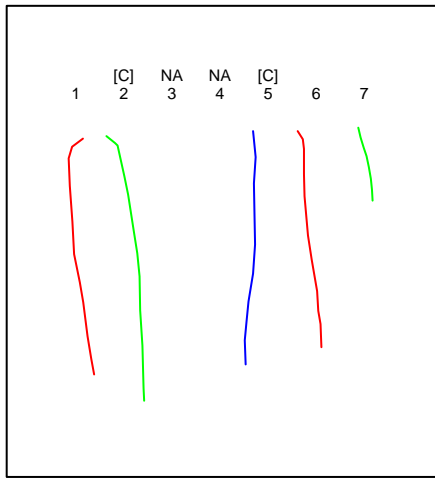

IL7-5-P75 REP2 plate A – Experiment REP2  
SiobhanMeasurements/Results\_12\_29\_14.tsv

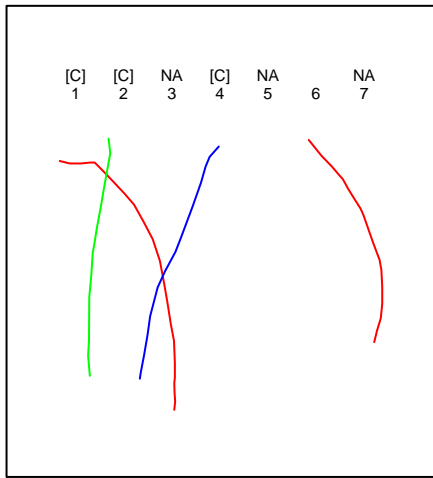

IL7-5-P75 REP2 plate B – Experiment REP2  
SiobhanMeasurements/Results\_12\_29\_14.tsv

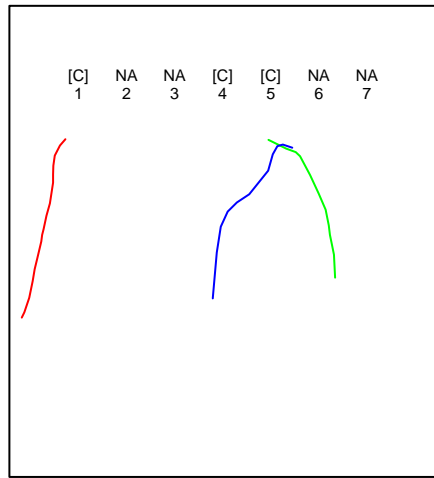

IL7-5-P75 REP3 plate A – Experiment REP3  
SiobhanMeasurements/Results\_12\_29\_14.tsv

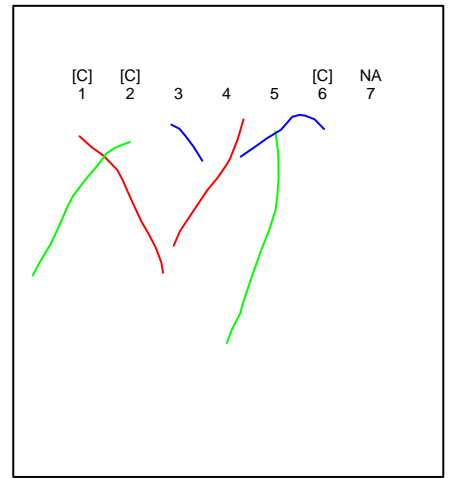

IL7-5-P75 REP3 plate B – Experiment REP3  
SiobhanMeasurements/Results\_12\_29\_14.tsv

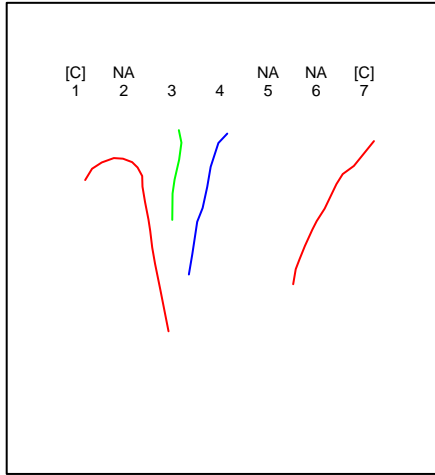

IL7-5-P75 REP4 plate A – Experiment REP4  
SiobhanMeasurements/Results\_12\_29\_14.tsv

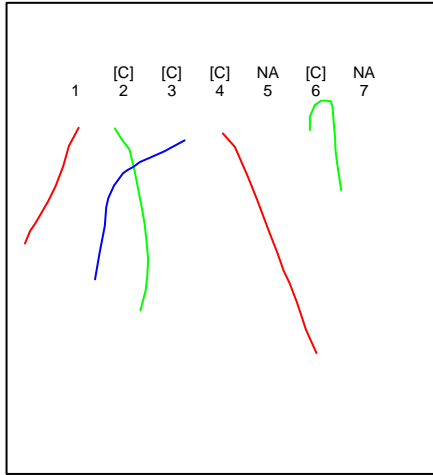

IL7-5-P75 REP4 plate B – Experiment REP4  
SiobhanMeasurements/Results\_12\_29\_14.tsv

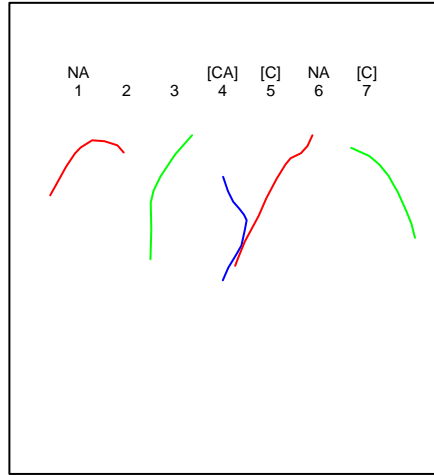

IL7-5-P75 REP5 plate A – Experiment REP5  
SiobhanMeasurements/Results\_12\_29\_14.tsv

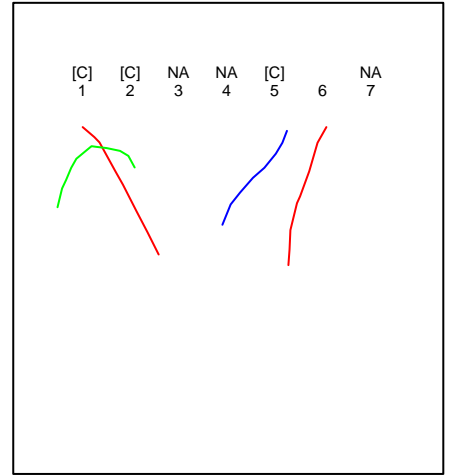

IL7-5-P75 REP5 plate B – Experiment REP5  
SiobhanMeasurements/Results\_12\_29\_14.tsv

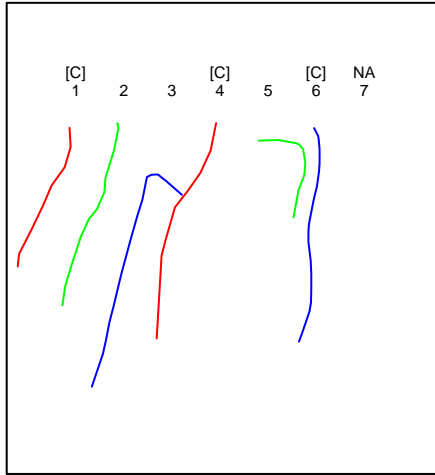

IL8-1 REP2 plate A – Experiment REP2  
SiobhanMeasurements/Results\_1\_1\_15.tsv

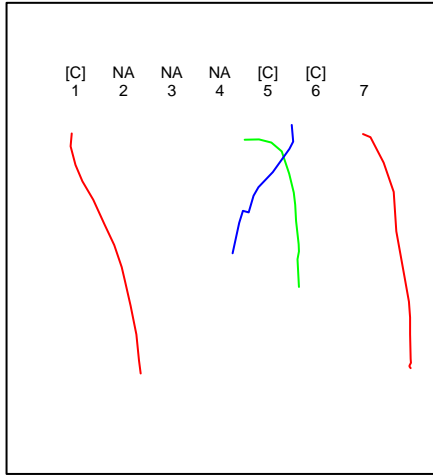

IL8-1 REP2 plate B – Experiment REP2  
SiobhanMeasurements/Results\_1\_1\_15.tsv

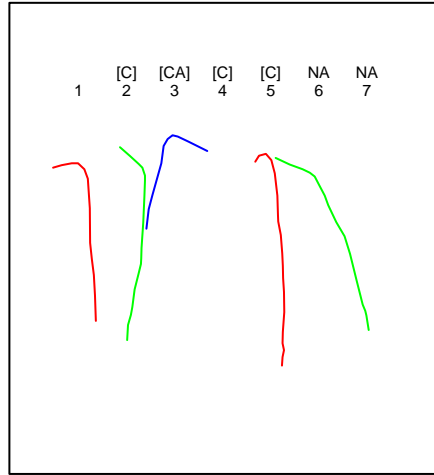

IL8-1 REP3 plate B – Experiment REP3  
Livingstone/roots.tsv

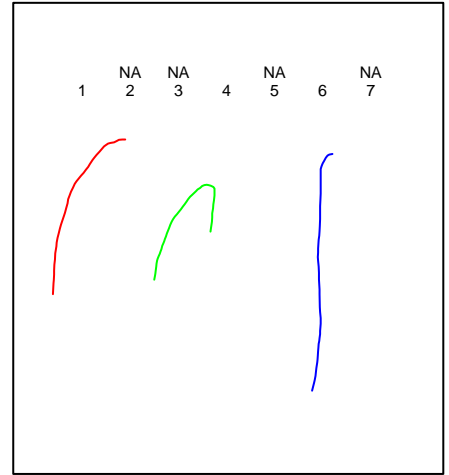

IL8-1 REP4 plate A – Experiment REP4  
Livingstone/roots.tsv

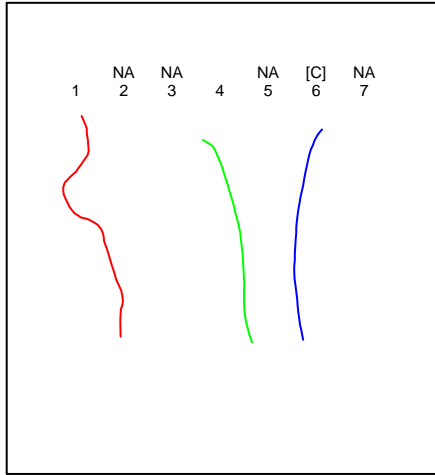

IL8-1 REP4 plate B – Experiment REP4  
Livingstone/roots.tsv

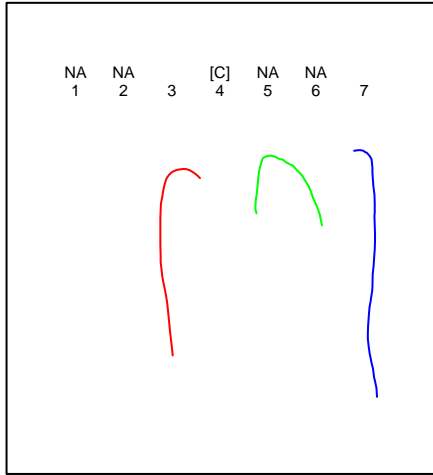

IL8-1 REP5 plate A – Experiment REP5  
Livingstone/roots.tsv

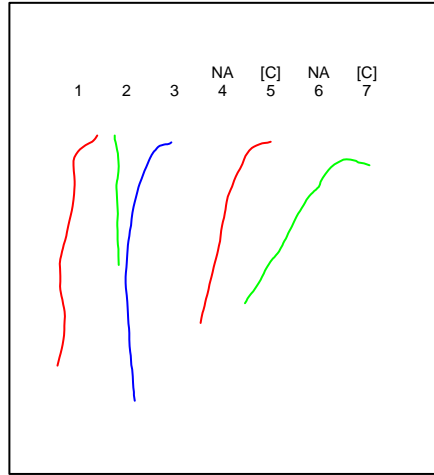

IL8-1 REP5 plate B – Experiment REP5  
Livingstone/roots.tsv

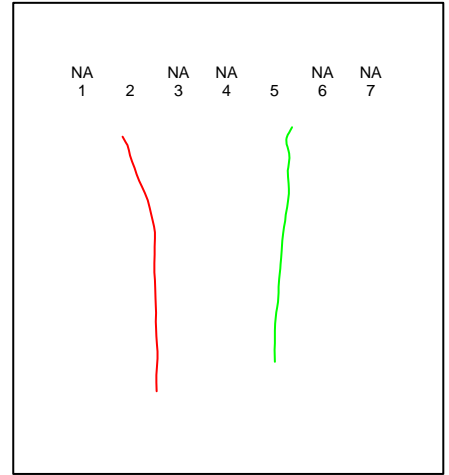

IL8-1-1 REP2 plate A – Experiment REP2  
Livingstone/roots.tsv

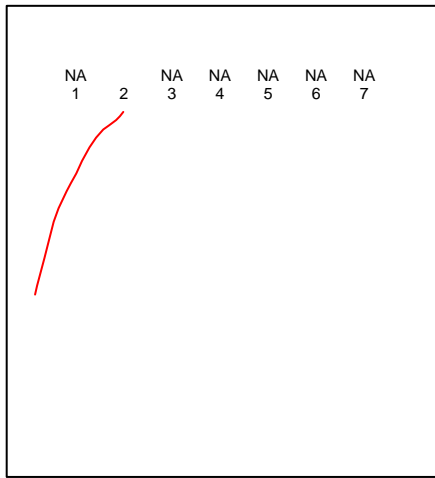

IL8-1-1 REP2 plate B – Experiment REP2  
Livingstone/roots.tsv

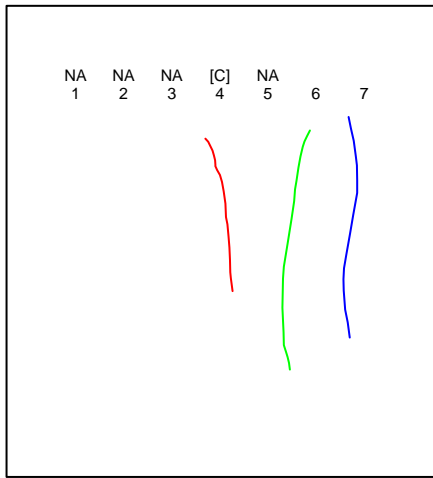

IL8-1-1 REP3 plate A – Experiment REP3  
Livingstone/roots.tsv

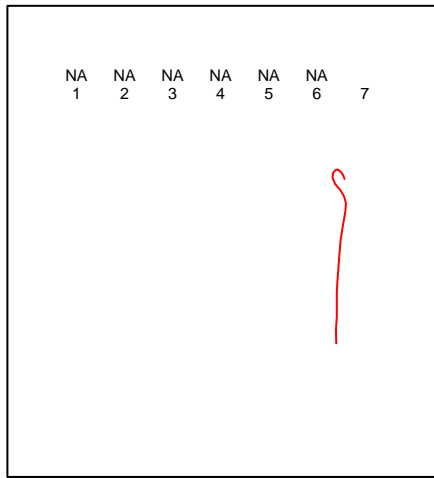

IL8-1-1 REP3 plate B – Experiment REP3  
Livingstone/roots.tsv

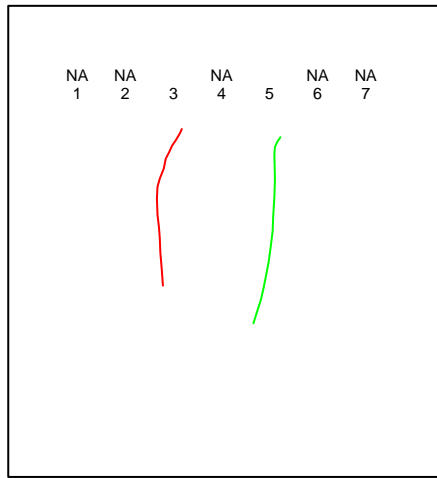

IL8-1-1 REP4 plate A – Experiment REP4  
Livingstone/roots.tsv

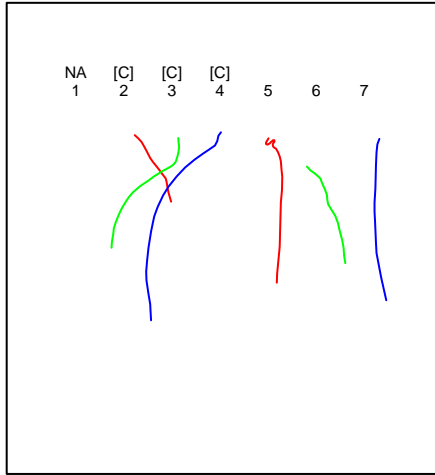

IL8-1-1 REP4 plate B – Experiment REP4  
Livingstone/roots.tsv

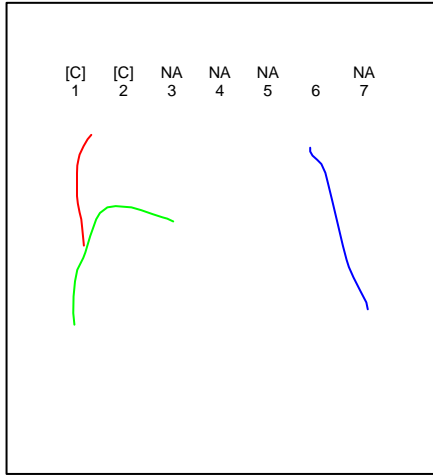

IL8-1-1 REP5 plate B – Experiment REP5  
Livingstone/roots.tsv

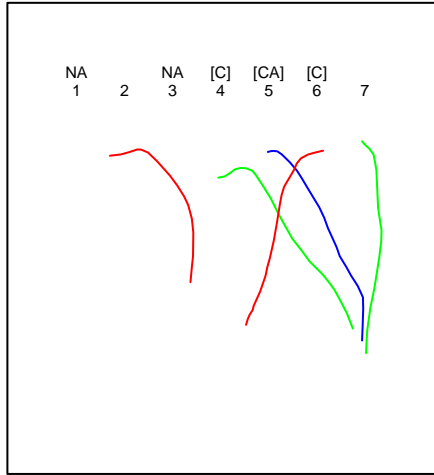

IL8-1-1 REP5 plate C – Experiment REPX1  
SiobhanMeasurements/Results\_01\_15\_15.tsv

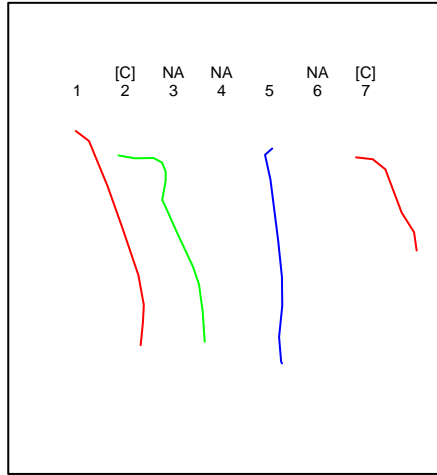

IL8-1-5 REP2 plate A – Experiment REP2  
SiobhanMeasurements/Results\_1\_1\_15.tsv

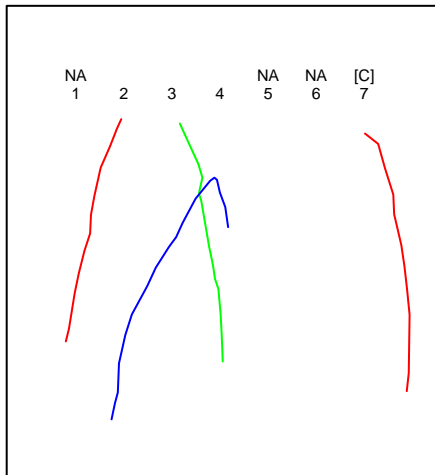

IL8-1-5 REP2 plate B – Experiment REP2  
SiobhanMeasurements/Results\_1\_1\_15.tsv

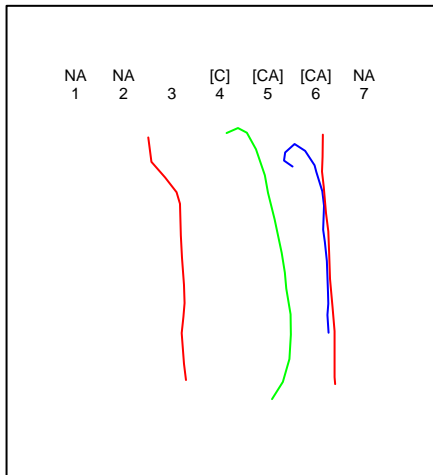

IL8-1-5 REP3 plate A – Experiment REP3  
SiobhanMeasurements/Results\_1\_1\_15.tsv

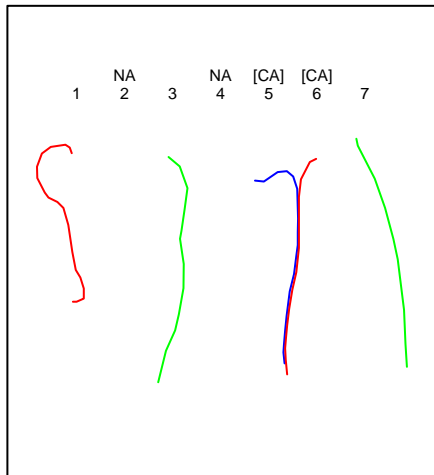

IL8-1-5 REP3 plate B – Experiment REP3  
SiobhanMeasurements/Results\_1\_1\_15.tsv

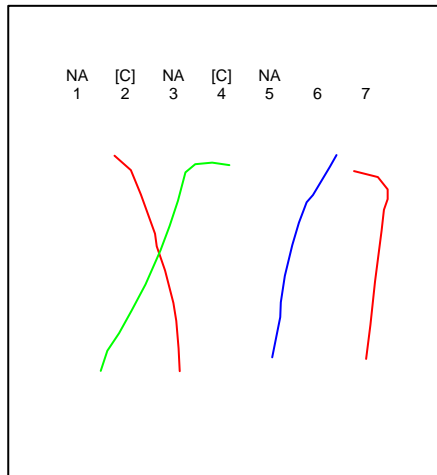

IL8-1-5 REP4 plate A – Experiment REP4  
SiobhanMeasurements/Results\_1\_1\_15.tsv

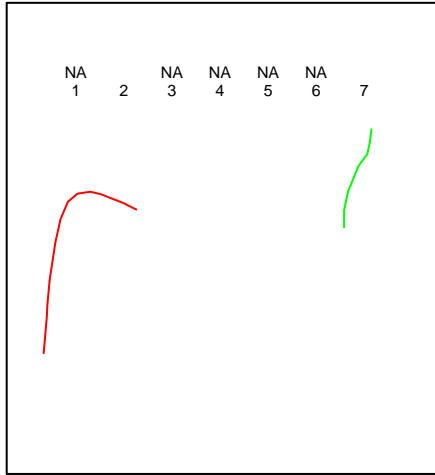

IL8-1-5 REP4 plate B – Experiment REP4  
SiobhanMeasurements/Results\_1\_1\_15.tsv

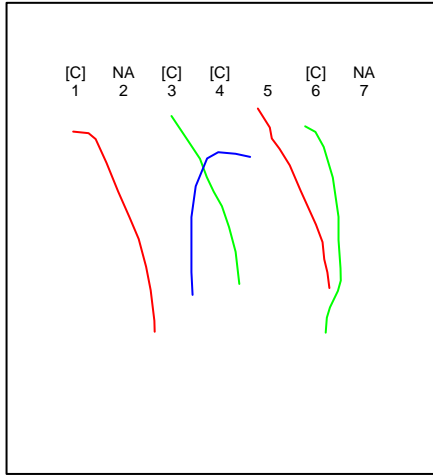

IL8-1-5 REP5 plate A – Experiment REP5  
SiobhanMeasurements/Results\_1\_1\_15.tsv

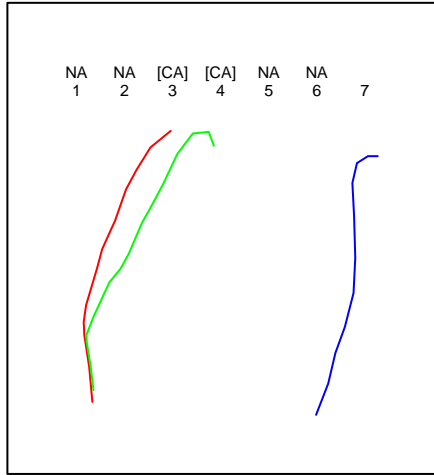

IL8-1-5 REP5 plate B – Experiment REP5  
SiobhanMeasurements/Results\_1\_1\_15.tsv

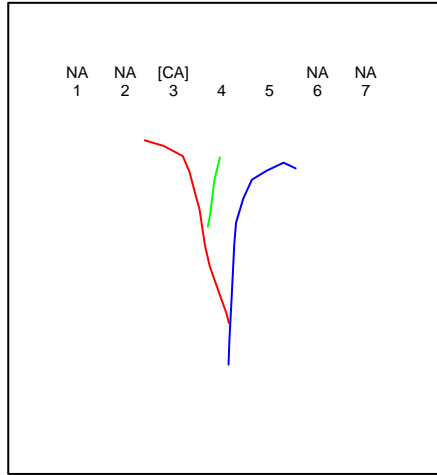



IL8-2-1 REP3 plate A – Experiment REP3  
Livingstone/roots.tsv

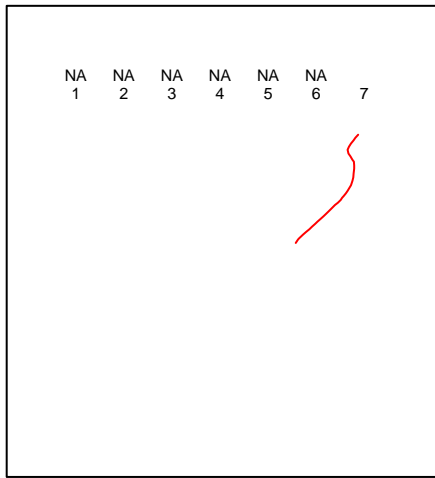

IL8-2-1 REP3 plate B – Experiment REP3  
Livingstone/roots.tsv

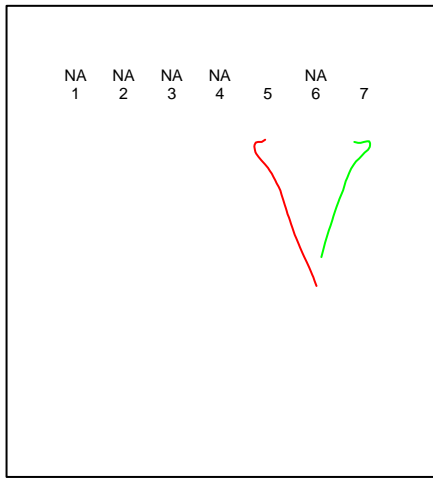

IL8-2-1 REP4 plate A – Experiment REP4  
Livingstone/roots.tsv

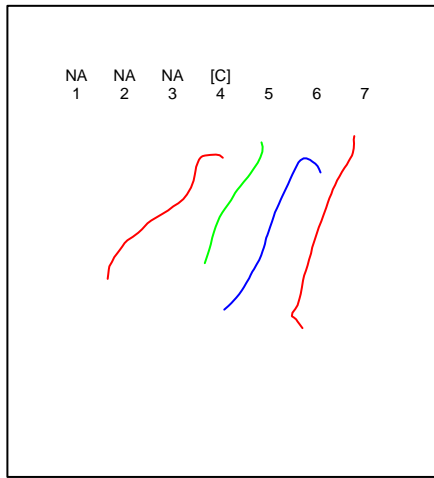

IL8-2-1 REP4 plate B – Experiment REP4  
Livingstone/roots.tsv

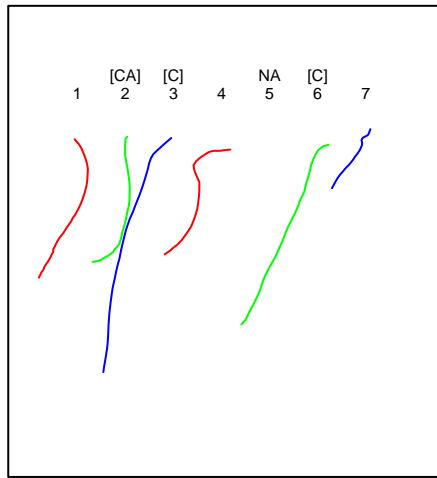

IL8-2-1 REP5 plate A – Experiment REP5  
Livingstone/roots.tsv

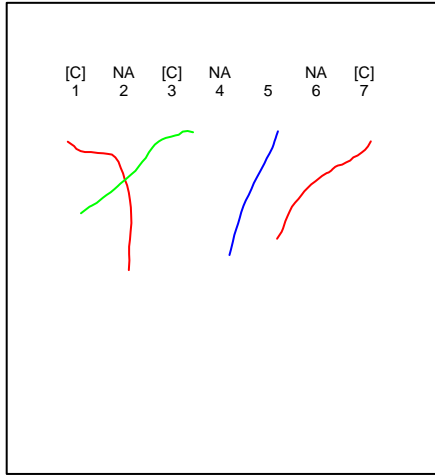

IL8-2-1 REP5 plate B – Experiment REP5  
Livingstone/roots.tsv

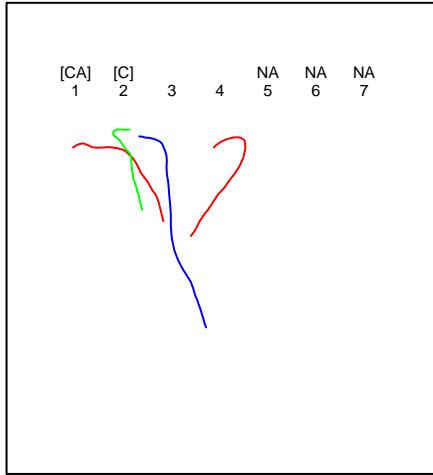

IL8-2-1 REP4 plate A – Experiment REPX1  
SiobhanMeasurements/Results\_1\_1\_15.tsv

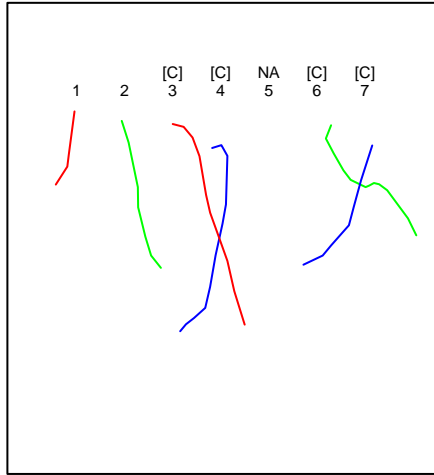

IL8-2-1 REP4 plate B – Experiment REPX1  
SiobhanMeasurements/Results\_1\_1\_15.tsv

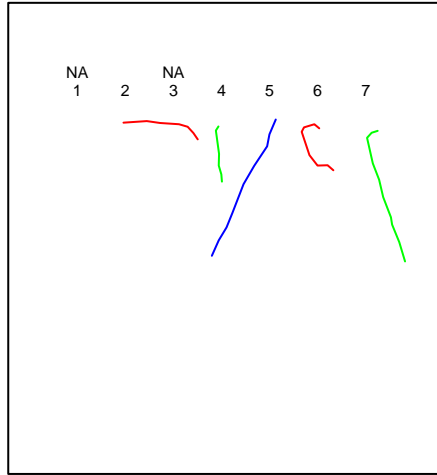

IL8-2-1 REP4 plate C – Experiment REPX1  
SiobhanMeasurements/Results\_1\_1\_15.tsv

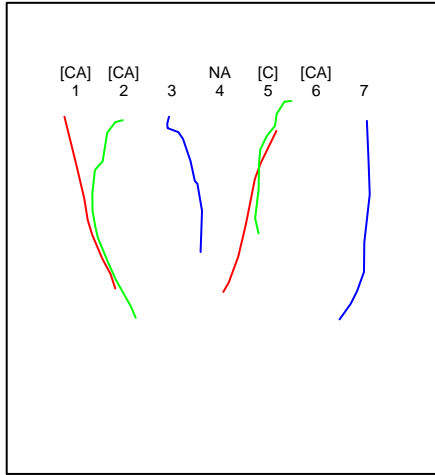

IL8-3 REP2 plate A – Experiment REP2  
SiobhanMeasurements/Siobhan\_Results\_12\_01.tsv

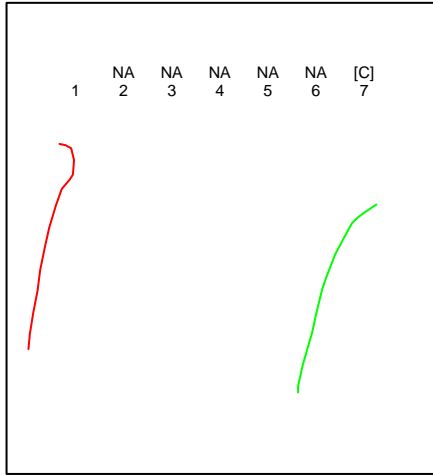

IL8-3 REP2 plate B – Experiment REP2  
SiobhanMeasurements/Siobhan\_Results\_12\_01.tsv

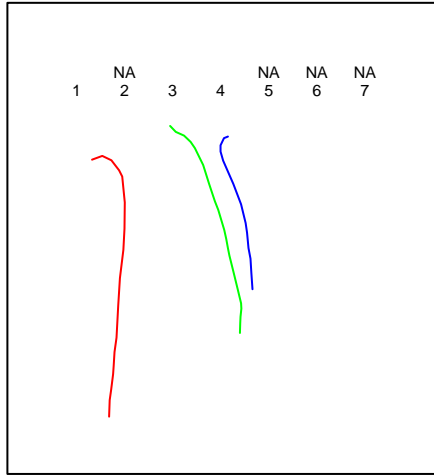

IL8-3 REP3 plate A – Experiment REP3  
SiobhanMeasurements/Siobhan\_Results\_12\_01.tsv

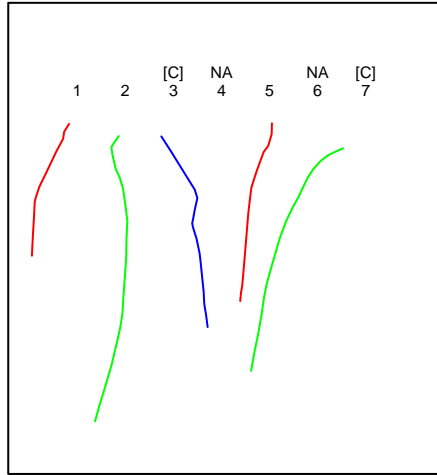

IL8-3 REP3 plate B – Experiment REP3  
SiobhanMeasurements/Siobhan\_Results\_12\_01.tsv

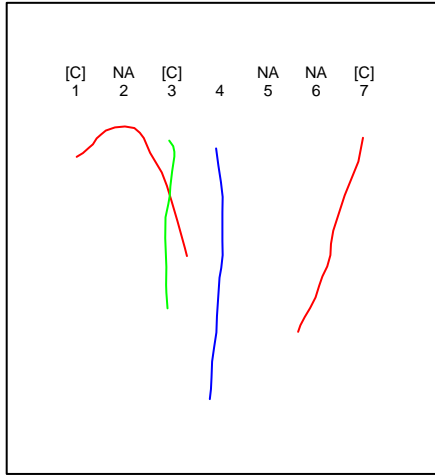

IL8-3 REP4 plate A – Experiment REP4  
SiobhanMeasurements/Siobhan\_Results\_12\_01.tsv

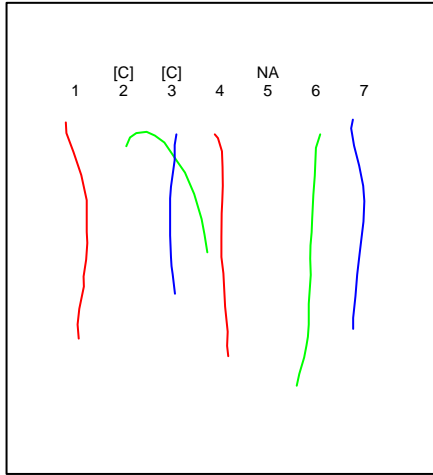

IL8-3 REP4 plate B – Experiment REP4  
SiobhanMeasurements/Siobhan\_Results\_12\_01.tsv

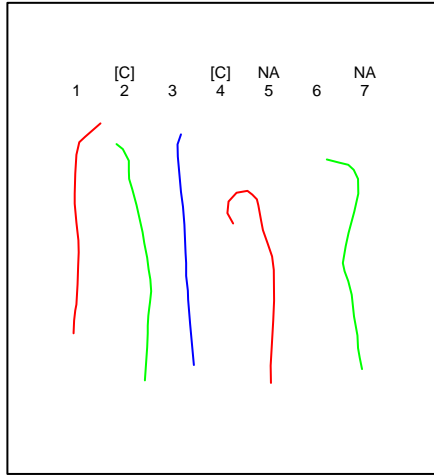

IL8-3 REP5 plate A – Experiment REP5  
SiobhanMeasurements/Siobhan\_Results\_12\_01.tsv

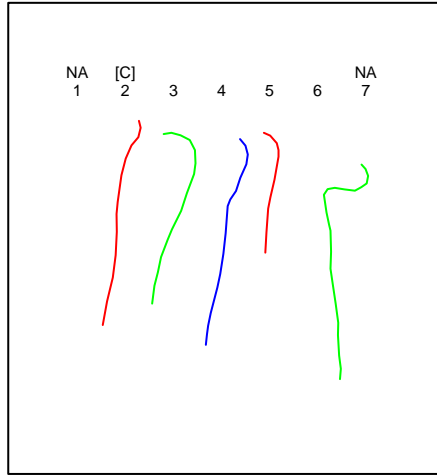

IL8-3 REP5 plate B – Experiment REP5  
SiobhanMeasurements/Siobhan\_Results\_12\_01.tsv

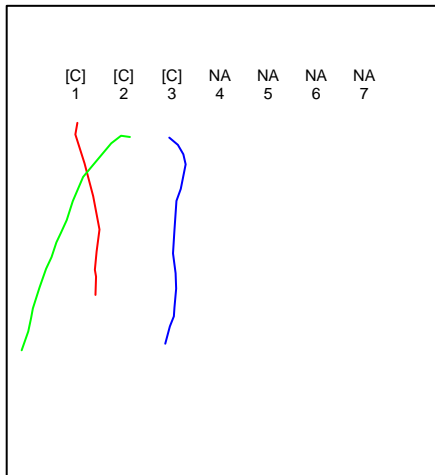

IL8-3-1 REP2 plate A – Experiment REP2  
Livingstone/roots.tsv

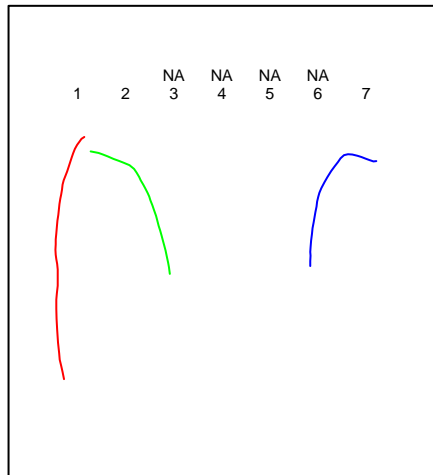

IL8-3-1 REP2 plate B – Experiment REP2  
Livingstone/roots.tsv

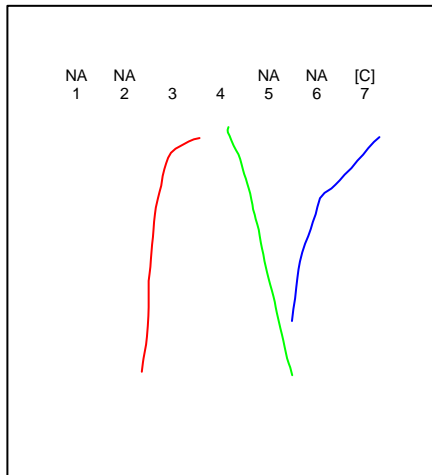

IL8-3-1 REP3 plate A – Experiment REP3  
Livingstone/roots.tsv

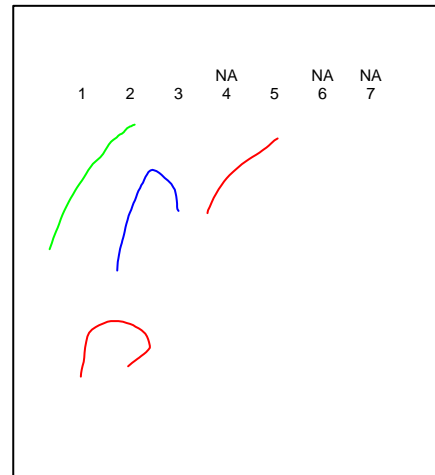

IL8-3-1 REP3 plate B – Experiment REP3  
Livingstone/roots.tsv

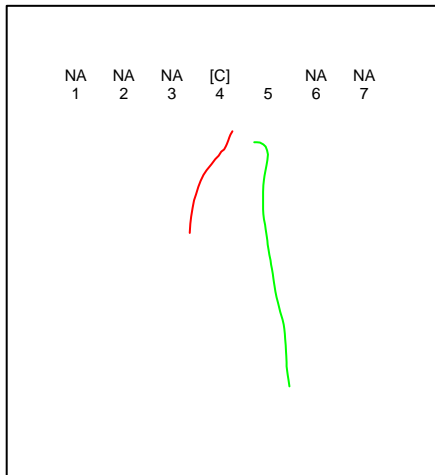

IL8-3-1 REP4 plate A – Experiment REP4  
Livingstone/roots.tsv

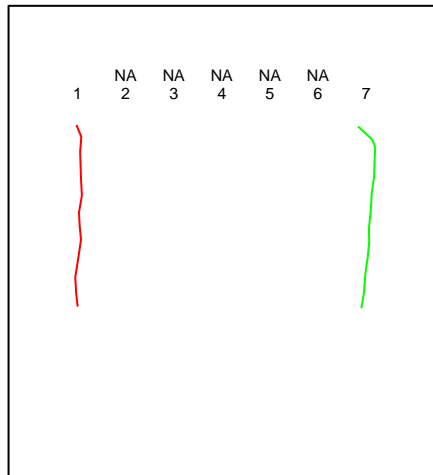

IL8-3-1 REP4 plate B – Experiment REP4  
Livingstone/roots.tsv

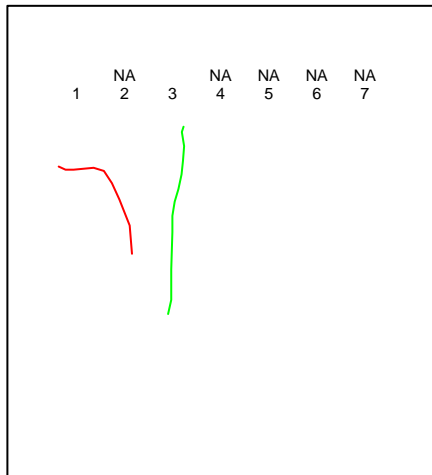

IL8-3-1 REP5 plate A – Experiment REP5  
Livingstone/roots.tsv

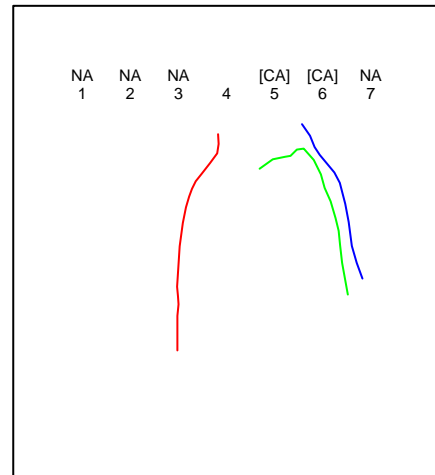

IL8-3-1 REP5 plate B – Experiment REP5  
Livingstone/roots.tsv

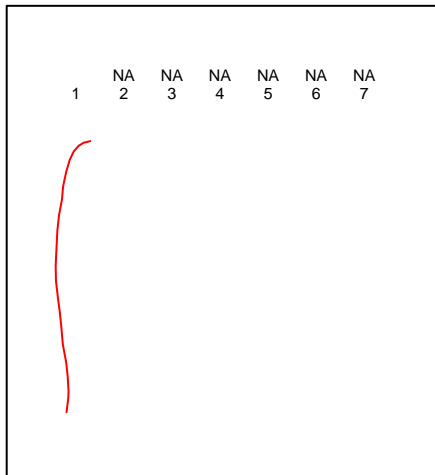

IL9-1 REP2 plate A – Experiment REP2  
Livingstone/roots.tsv

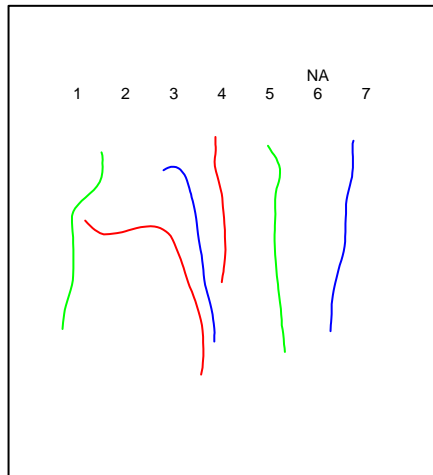

IL9-1 REP2 plate B – Experiment REP2  
Livingstone/roots.tsv

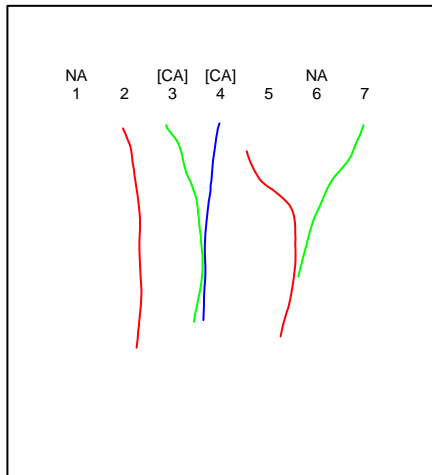

IL9-1 REP3 plate A – Experiment REP3  
Livingstone/roots.tsv

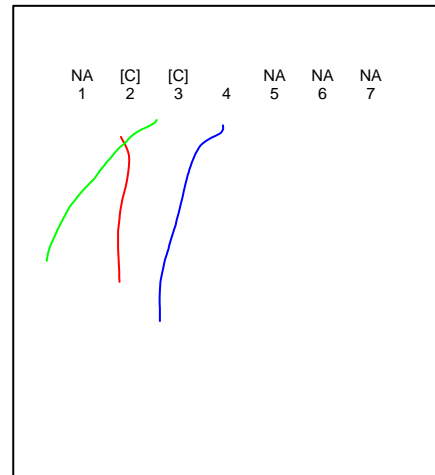

IL9-1 REP3 plate B – Experiment REP3  
Livingstone/roots.tsv

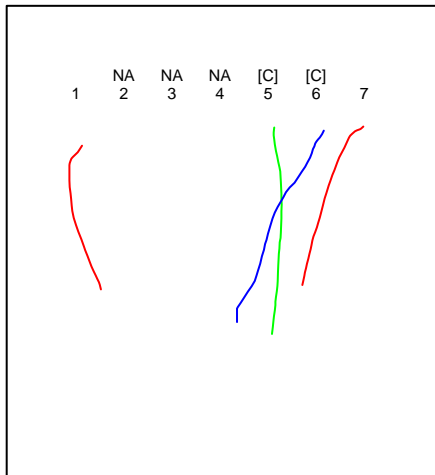

IL9-1 REP4 plate A – Experiment REP4  
Livingstone/roots.tsv

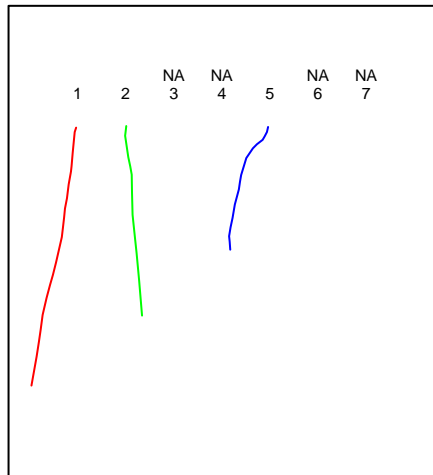

IL9-1 REP4 plate B – Experiment REP4  
Livingstone/roots.tsv

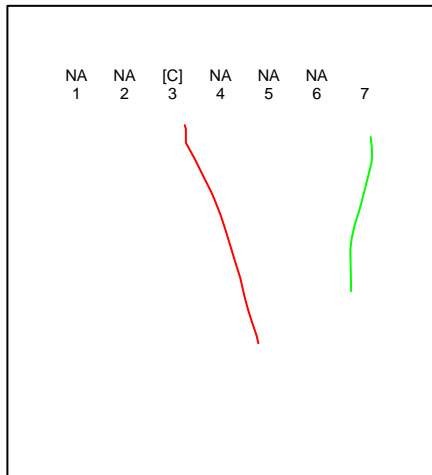

IL9-1 REP5 plate A – Experiment REP5  
Livingstone/roots.tsv

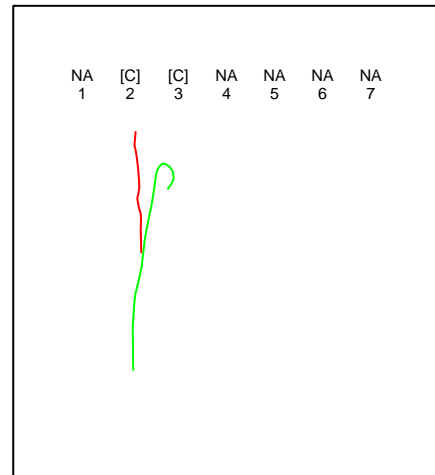

IL9-1 REP5 plate B – Experiment REP5  
Livingstone/roots.tsv

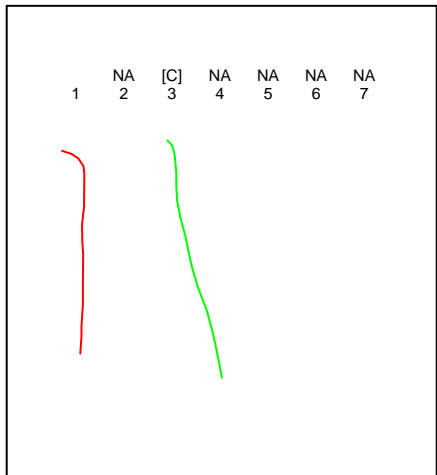

IL9-1-2 REP2 plate A – Experiment REP2  
Livingstone/roots.tsv

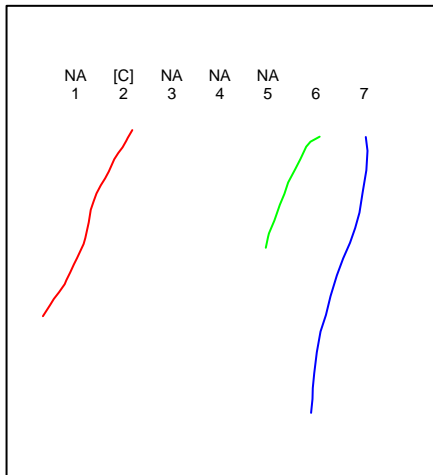

IL9-1-2 REP2 plate B – Experiment REP2  
Livingstone/roots.tsv

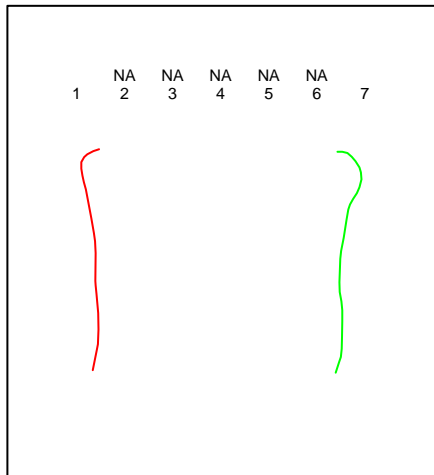

IL9-1-2 REP3 plate A – Experiment REP3  
Livingstone/roots.tsv

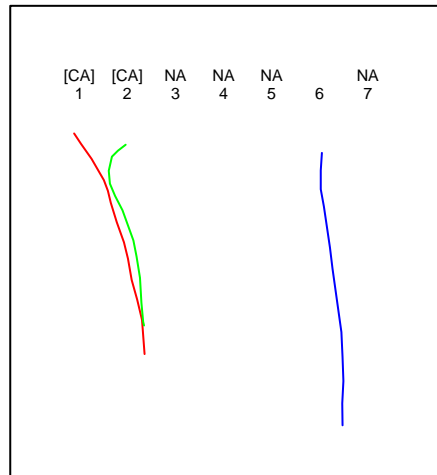

IL9-1-2 REP3 plate B – Experiment REP3  
Livingstone/roots.tsv

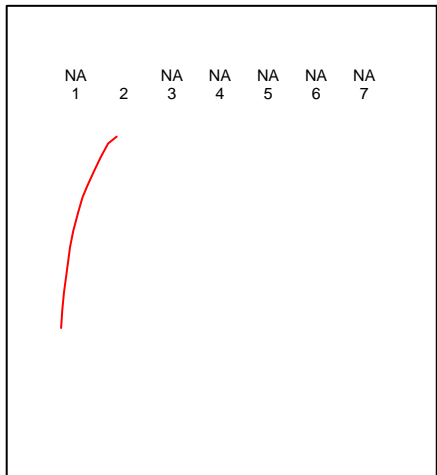

IL9-1-2 REP5 plate A – Experiment REP5  
SiobhanMeasurements/Results\_1\_1\_15.tsv

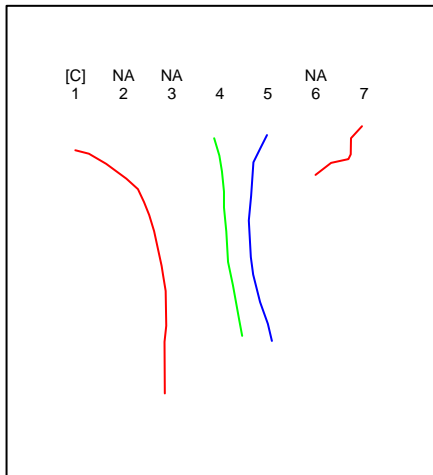

IL9-1-2 REP5 plate B – Experiment REP5  
SiobhanMeasurements/Results\_1\_1\_15.tsv

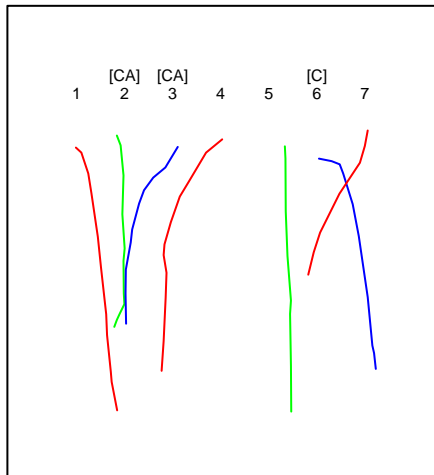

IL9-1-3 REP2 plate A – Experiment REP2  
SiobhanMeasurements/Results\_1\_1\_15.tsv

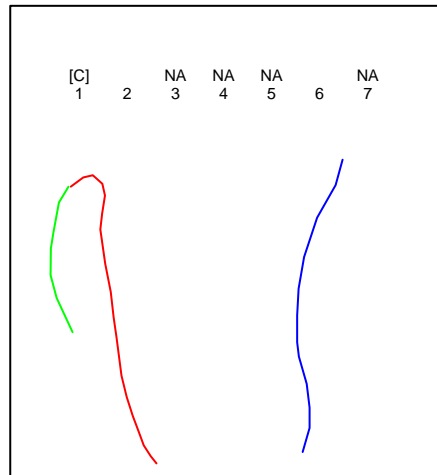

IL9-1-3 REP2 plate B – Experiment REP2  
SiobhanMeasurements/Results\_1\_1\_15.tsv

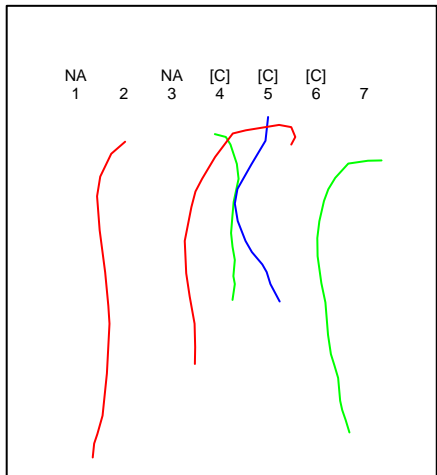

IL9-1-3 REP2 plate C – Experiment REP2  
SiobhanMeasurements/Results\_1\_1\_15.tsv

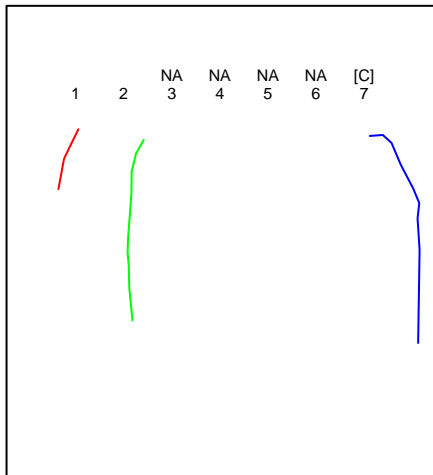

IL9-1-3 REP3 plate A – Experiment REP3  
SiobhanMeasurements/Results\_1\_1\_15.tsv

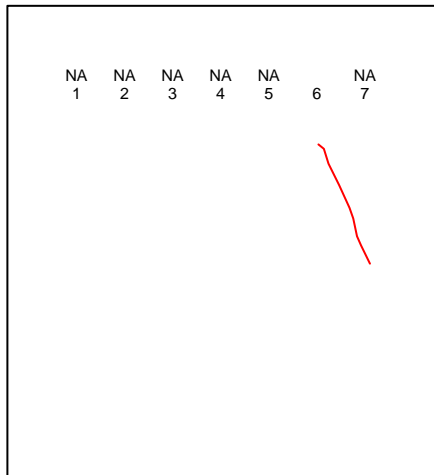

IL9-1-3 REP3 plate C – Experiment REP3  
SiobhanMeasurements/Results\_1\_1\_15.tsv

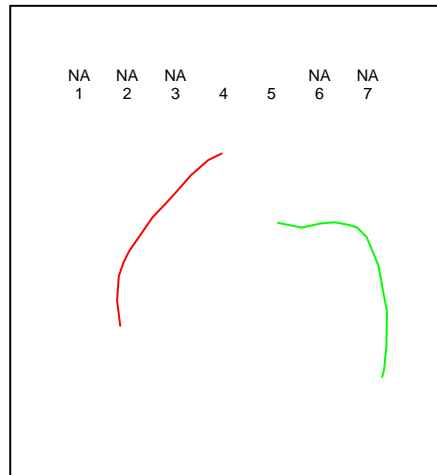

IL9-1-3 REP3 plate D – Experiment REP3  
SiobhanMeasurements/Results\_1\_1\_15.tsv

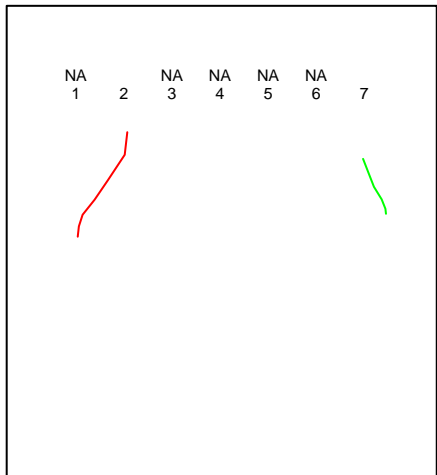

IL9-1-3 REP4 plate A – Experiment REP4  
SiobhanMeasurements/Results\_1\_1\_15.tsv

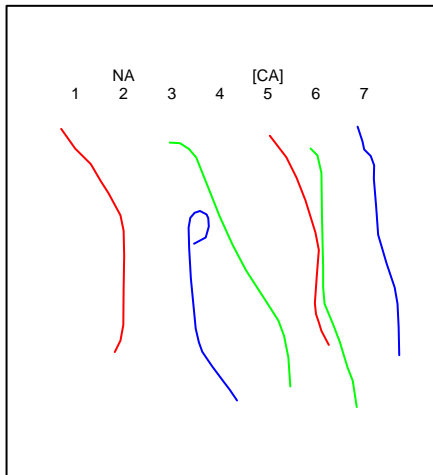

IL9-1-3 REP4 plate B – Experiment REP4  
SiobhanMeasurements/Results\_1\_1\_15.tsv

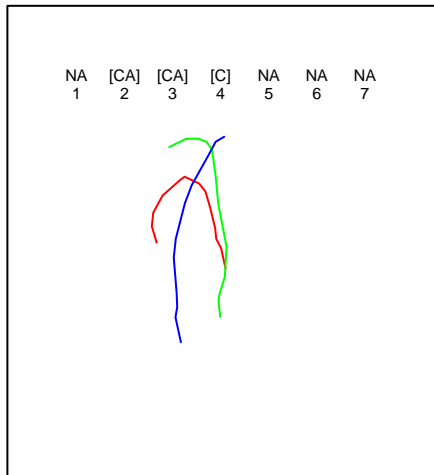

IL9-1-3 REP5 plate A – Experiment REP5  
SiobhanMeasurements/Results\_1\_1\_15.tsv

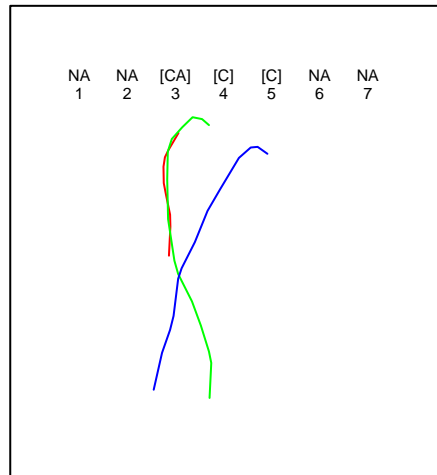

IL9-1-3 REP5 plate B – Experiment REP5  
SiobhanMeasurements/Results\_1\_1\_15.tsv

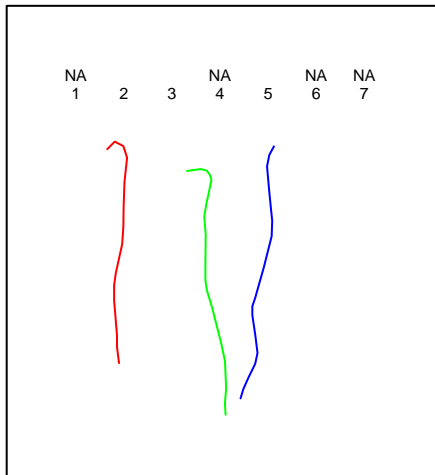

IL9-1-3 REP5 plate A – Experiment REPX1  
SiobhanMeasurements/Results\_1\_1\_15.tsv

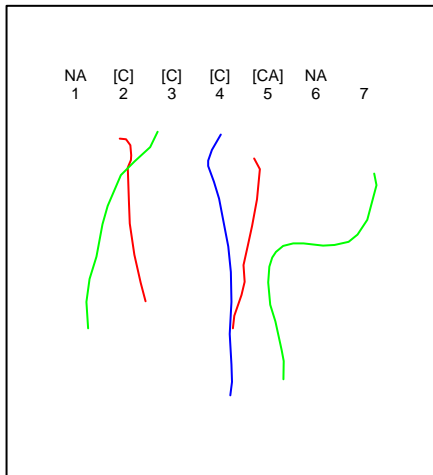

IL9-1-3 REP5 plate B – Experiment REPX1  
SiobhanMeasurements/Results\_1\_1\_15.tsv

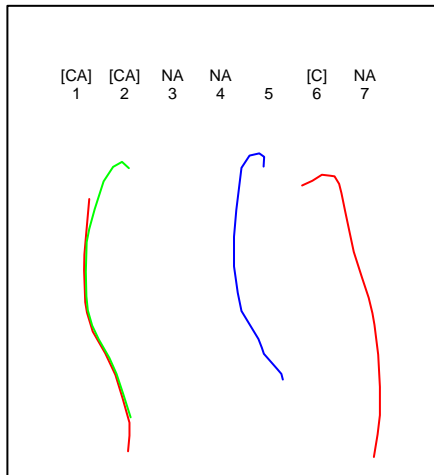

IL9-1-3 REP5 plate D – Experiment REPX1  
SiobhanMeasurements/Results\_1\_1\_15.tsv

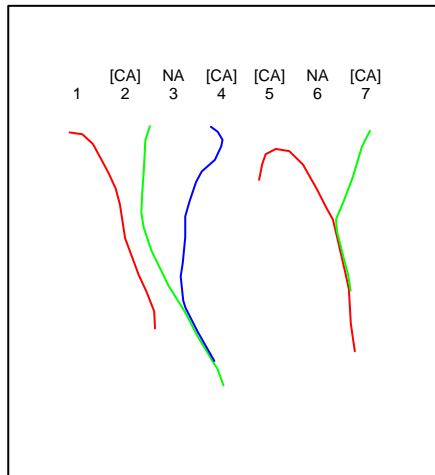

IL9-2 REP2 plate A – Experiment REP2  
SiobhanMeasurements/Results\_1\_1\_15.tsv

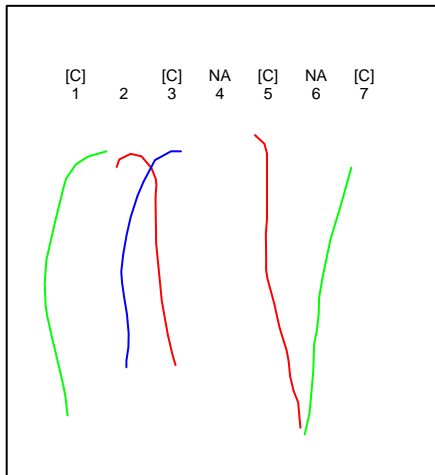

IL9-2 REP2 plate B – Experiment REP2  
SiobhanMeasurements/Results\_1\_1\_15.tsv

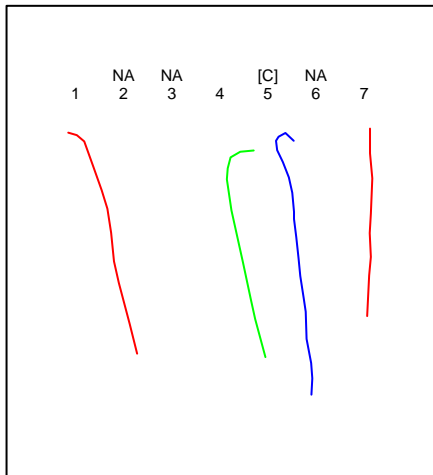

IL9-2 REP3 plate A – Experiment REP3  
SiobhanMeasurements/Results\_1\_1\_15.tsv

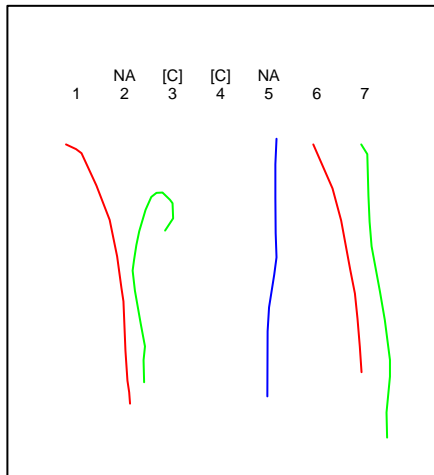

IL9-2 REP3 plate B – Experiment REP3  
SiobhanMeasurements/Results\_1\_1\_15.tsv

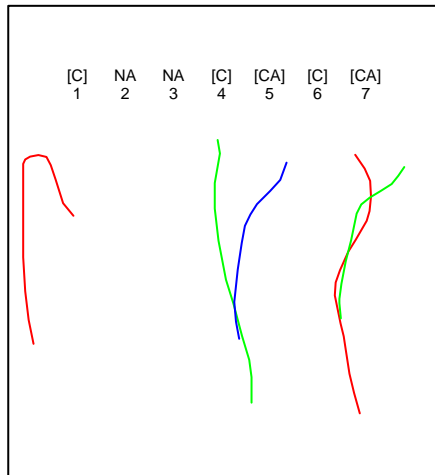

IL9-2 REP4 plate A – Experiment REP4  
SiobhanMeasurements/Results\_1\_1\_15.tsv

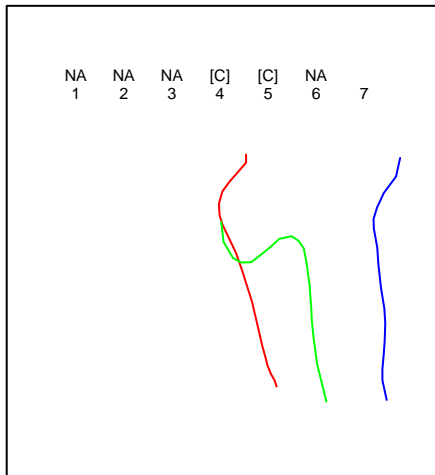

IL9-2 REP4 plate B – Experiment REP4  
SiobhanMeasurements/Results\_1\_1\_15.tsv

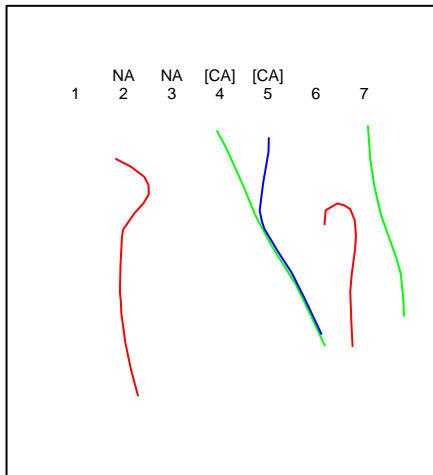

IL9-2 REP5 plate A – Experiment REP5  
SiobhanMeasurements/Results\_1\_1\_15.tsv

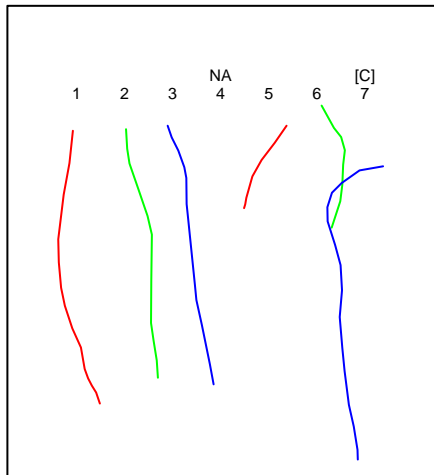

IL9-2 REP5 plate B – Experiment REP5  
SiobhanMeasurements/Results\_1\_1\_15.tsv

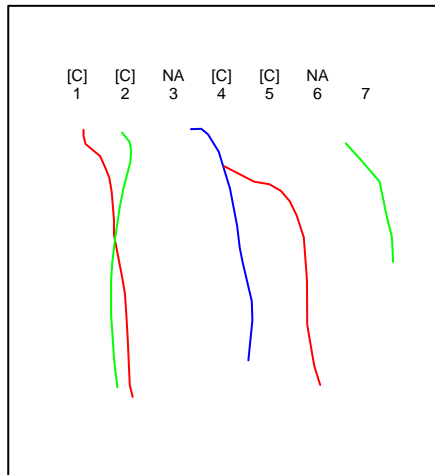

IL9-2-5 REP2 plate A – Experiment REP2  
SiobhanMeasurements/Results\_1\_1\_15.tsv

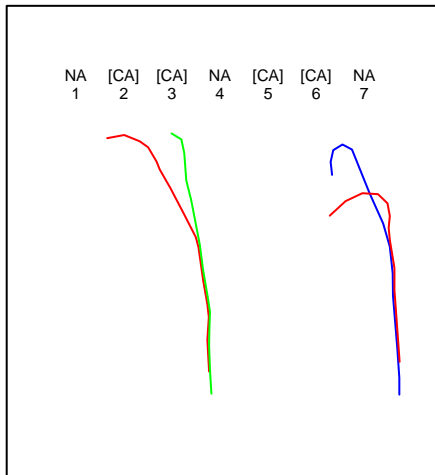

IL9-2-5 REP2 plate B – Experiment REP2  
SiobhanMeasurements/Results\_1\_1\_15.tsv

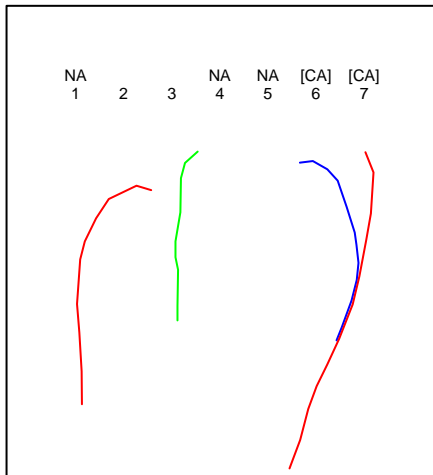

IL9-2-5 REP3 plate A – Experiment REP3  
SiobhanMeasurements/Results\_1\_1\_15.tsv

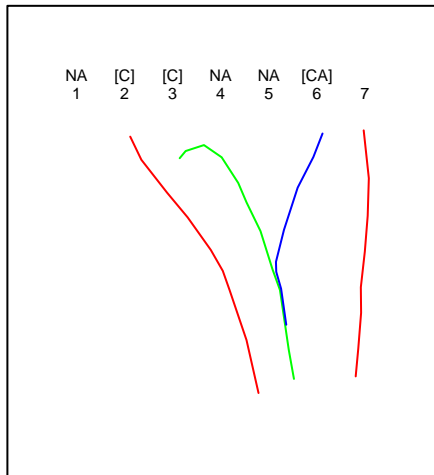

IL9-2-5 REP3 plate B – Experiment REP3  
SiobhanMeasurements/Results\_1\_1\_15.tsv

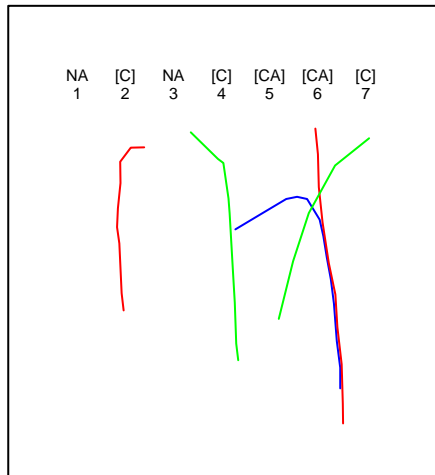

IL9-2-5 REP4 plate A – Experiment REP4  
SiobhanMeasurements/Results\_1\_1\_15.tsv

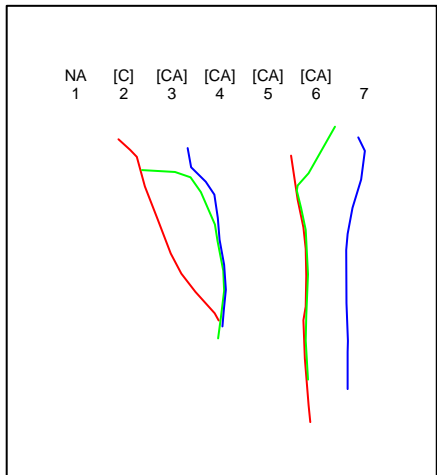

IL9-2-5 REP4 plate B – Experiment REP4  
SiobhanMeasurements/Results\_1\_1\_15.tsv

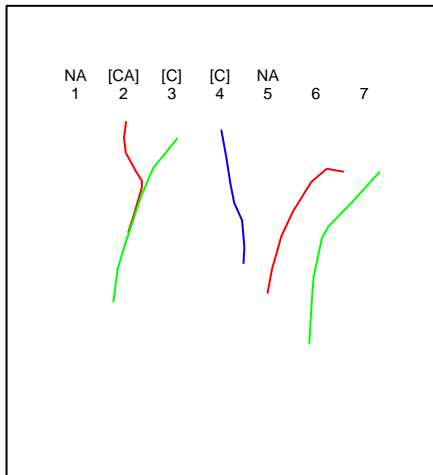

IL9-2-5 REP5 plate A – Experiment REP5  
SiobhanMeasurements/Results\_1\_1\_15.tsv

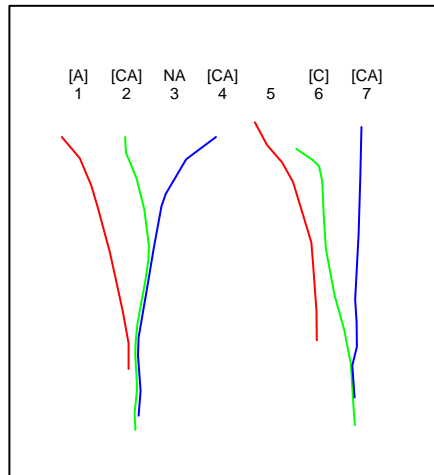

IL9-2-5 REP5 plate B – Experiment REP5  
SiobhanMeasurements/Results\_1\_1\_15.tsv

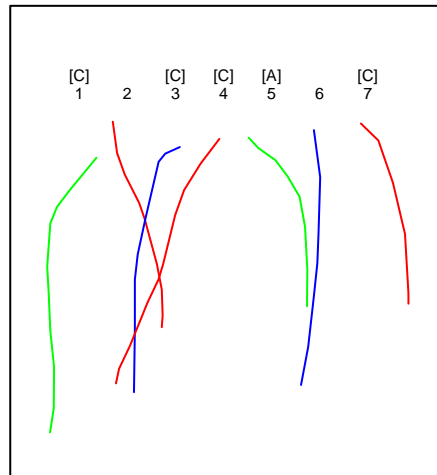

IL9-2-6 REP2 plate A – Experiment REP2  
SiobhanMeasurements/Siobhan\_Results\_11\_27.tsv

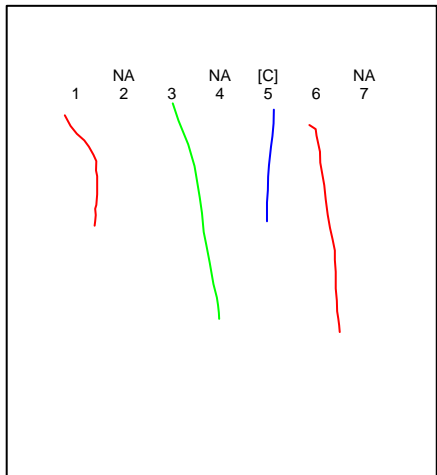

IL9-2-6 REP2 plate B – Experiment REP2  
SiobhanMeasurements/Siobhan\_Results\_11\_27.tsv

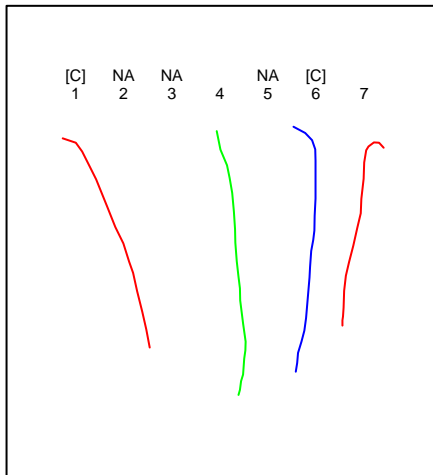

IL9-2-6 REP3 plate A – Experiment REP3  
SiobhanMeasurements/Siobhan\_Results\_11\_27.tsv

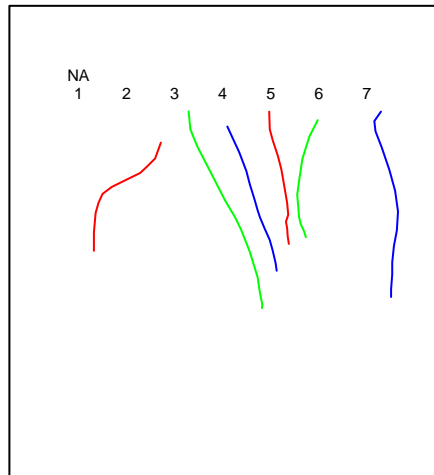

IL9-2-6 REP3 plate B – Experiment REP3  
SiobhanMeasurements/Siobhan\_Results\_11\_27.tsv

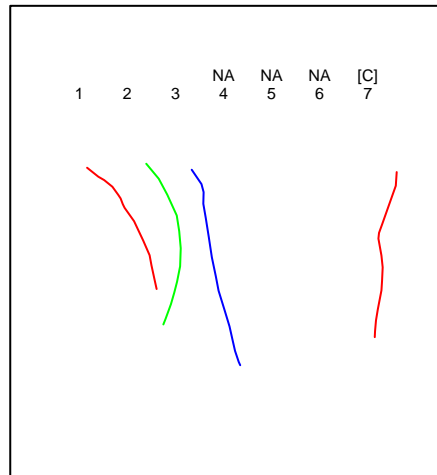

IL9-2-6 REP4 plate A – Experiment REP4  
SiobhanMeasurements/Siobhan\_Results\_11\_27.tsv

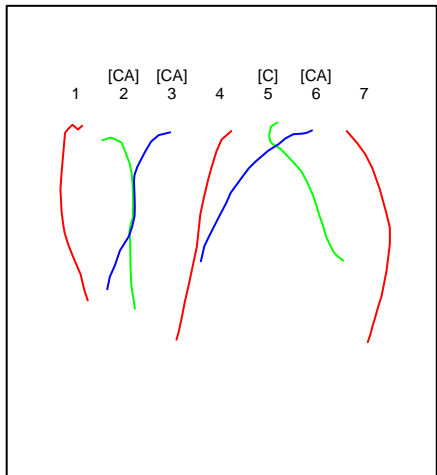

IL9-2-6 REP4 plate B – Experiment REP4  
SiobhanMeasurements/Siobhan\_Results\_11\_27.tsv

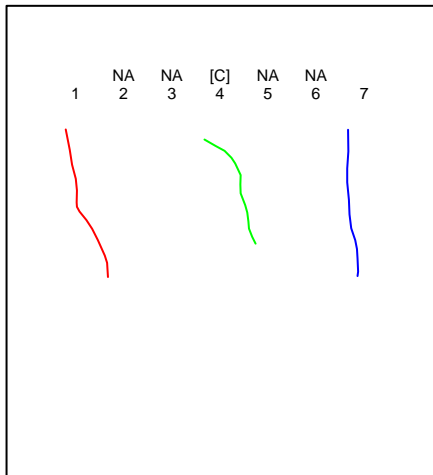

IL9-2-6 REP5 plate A – Experiment REP5  
SiobhanMeasurements/Siobhan\_Results\_11\_27.tsv

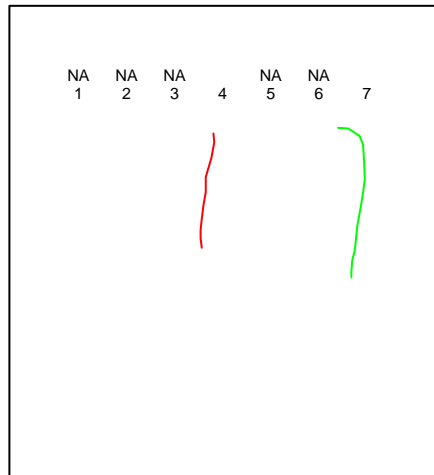

IL9-2-6 REP5 plate B – Experiment REP5  
SiobhanMeasurements/Siobhan\_Results\_11\_27.tsv

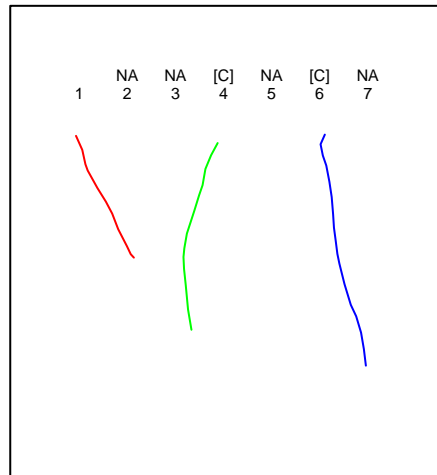

IL9-3 REP2 plate A – Experiment REP2  
SiobhanMeasurements/Siobhan\_Results\_12\_02.tsv

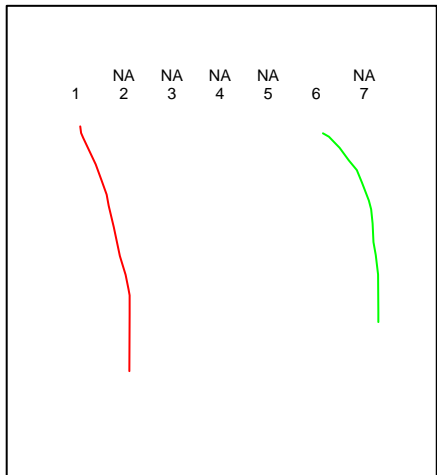

IL9-3 REP2 plate B – Experiment REP2  
SiobhanMeasurements/Siobhan\_Results\_12\_02.tsv

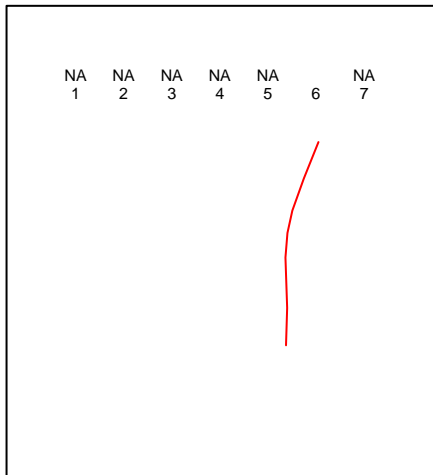

IL9-3 REP3 plate A – Experiment REP3  
SiobhanMeasurements/Siobhan\_Results\_12\_02.tsv

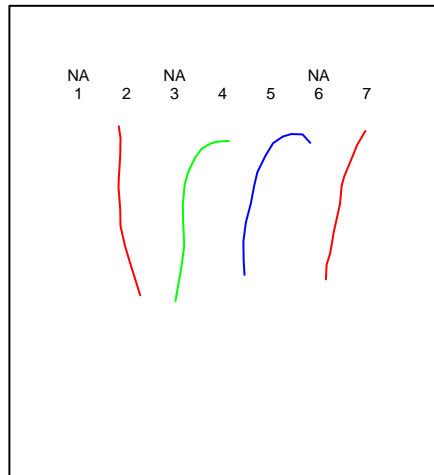

IL9-3 REP3 plate B – Experiment REP3  
SiobhanMeasurements/Siobhan\_Results\_12\_02.tsv

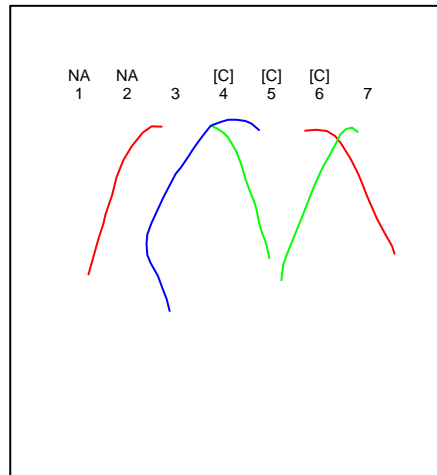

IL9-3 REP4 plate A – Experiment REP4  
SiobhanMeasurements/Siobhan\_Results\_12\_02.tsv

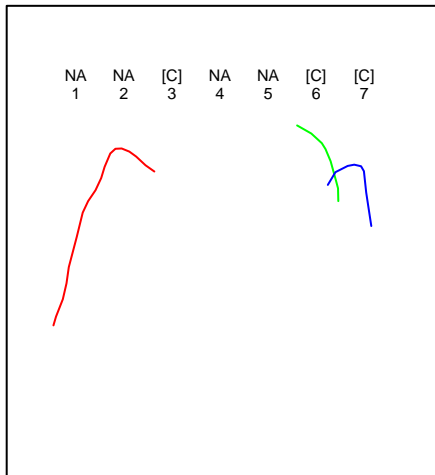

IL9-3 REP4 plate B – Experiment REP4  
SiobhanMeasurements/Siobhan\_Results\_12\_02.tsv

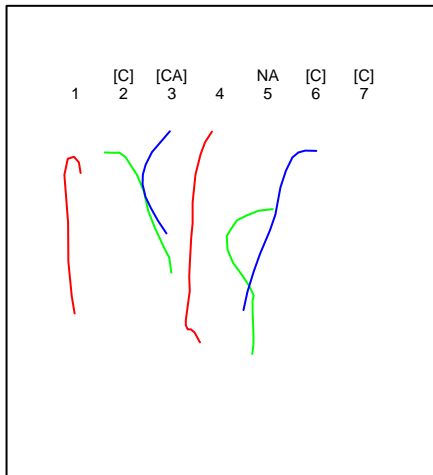

IL9-3 REP5 plate A – Experiment REP5  
SiobhanMeasurements/Siobhan\_Results\_12\_02.tsv

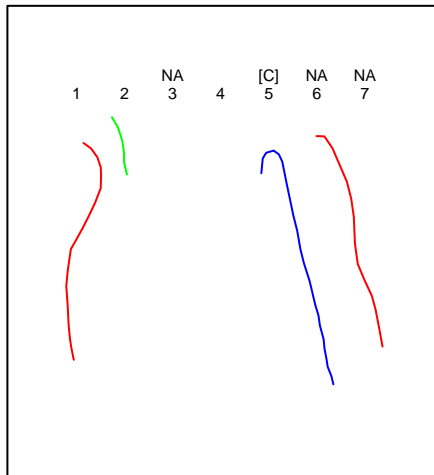

IL9-3 REP5 plate B – Experiment REP5  
SiobhanMeasurements/Siobhan\_Results\_12\_02.tsv

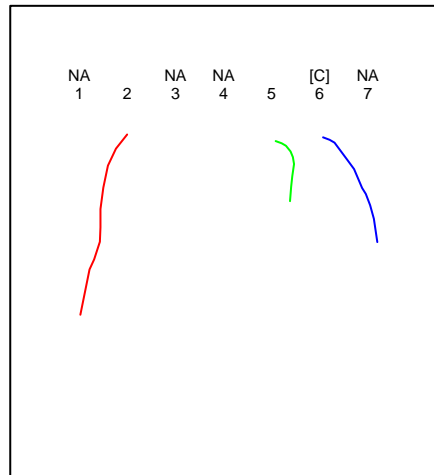

IL9-3 REP2 plate A – Experiment REPX1  
SiobhanMeasurements/Siobhan\_Results\_12\_02.tsv

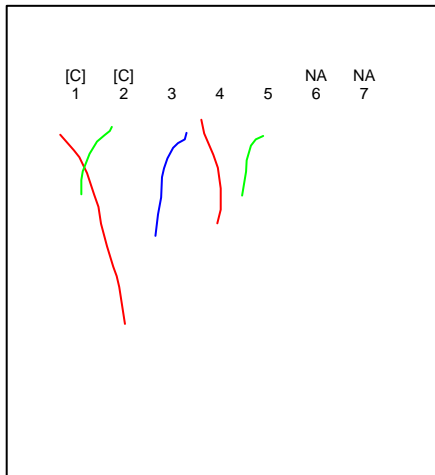

IL9-3 REP2 plate B – Experiment REPX1  
SiobhanMeasurements/Siobhan\_Results\_12\_02.tsv

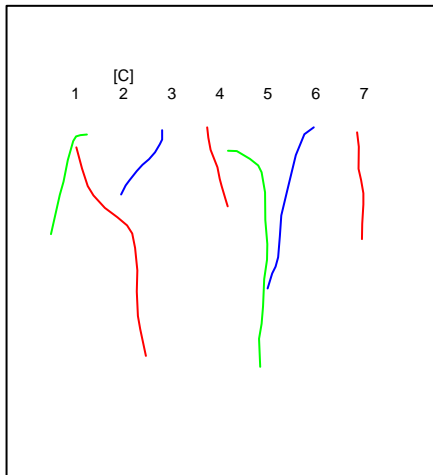

IL9-3-1 REP3 plate A – Experiment REP3  
Livingstone/roots.tsv

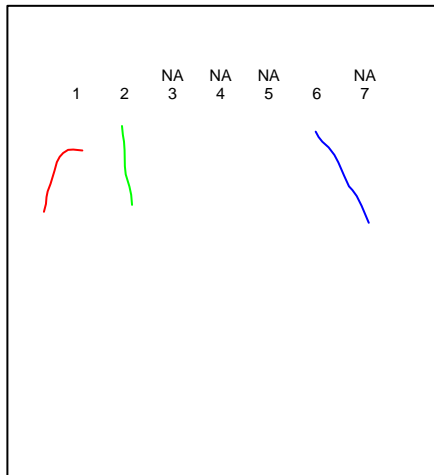

IL9-3-1 REP3 plate B – Experiment REP3  
Livingstone/roots.tsv

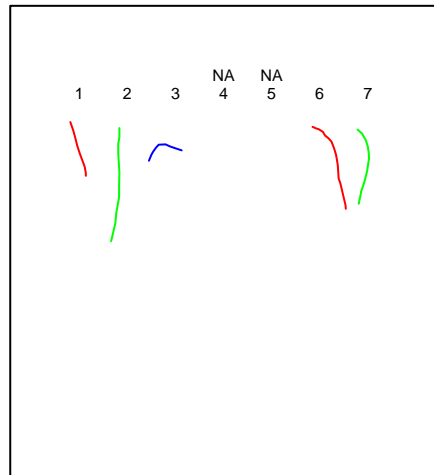

IL9-3-1 REP4 plate A – Experiment REP4  
Livingstone/roots.tsv

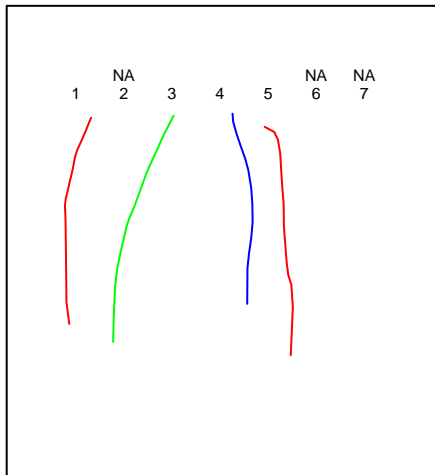

IL9-3-1 REP4 plate B – Experiment REP4  
Livingstone/roots.tsv

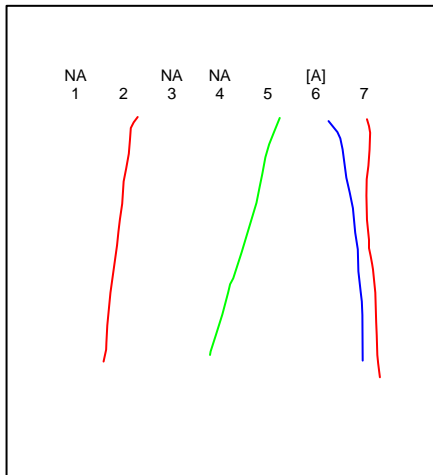

IL9-3-1 REP5 plate A – Experiment REP5  
Livingstone/roots.tsv

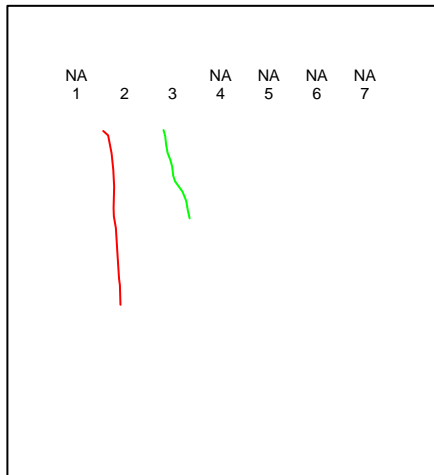

IL9-3-1 REP5 plate B – Experiment REP5  
Livingstone/roots.tsv

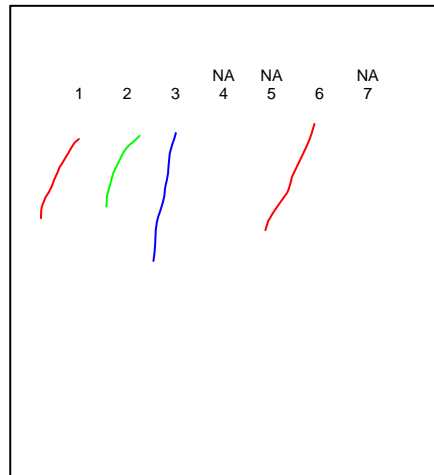

IL9-3-1 REP2 plate A – Experiment REPN2  
SiobhanMeasurements/Results\_01\_15\_15.tsv

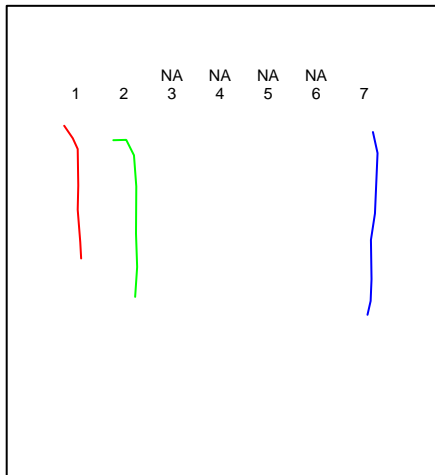

IL9-3-1 REP2 plate B – Experiment REPN2  
SiobhanMeasurements/Results\_01\_15\_15.tsv

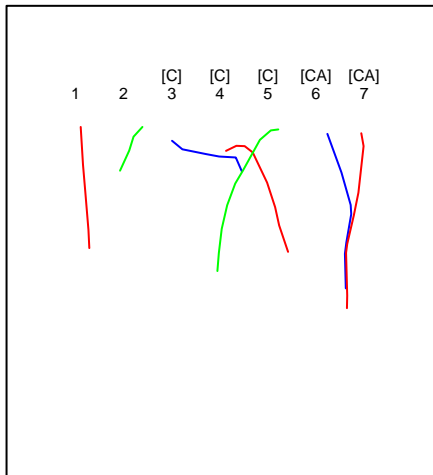

IL9-3-1 REP3 plate A – Experiment REPN3  
SiobhanMeasurements/Results\_01\_15\_15.tsv

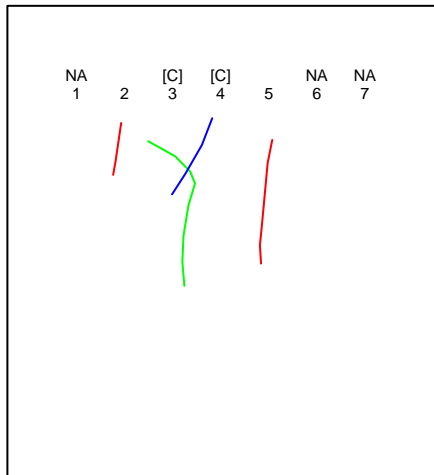

IL9-3-1 REP3 plate B – Experiment REPN3  
SiobhanMeasurements/Results\_01\_15\_15.tsv

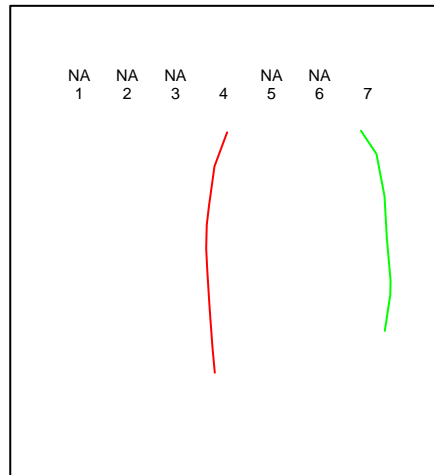

IL9-3-1 REP4 plate A – Experiment REPN4  
SiobhanMeasurements/Results\_01\_15\_15.tsv

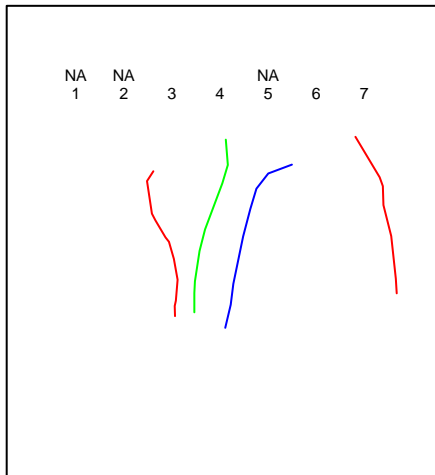

IL9-3-1 REP4 plate B – Experiment REPN4  
SiobhanMeasurements/Results\_01\_15\_15.tsv

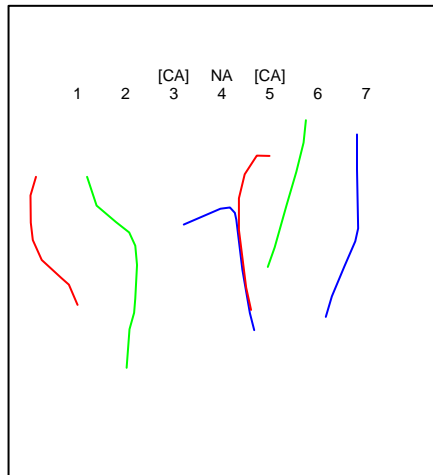

IL9-3-1 REP5 plate A – Experiment REPN5  
SiobhanMeasurements/Results\_01\_15\_15.tsv

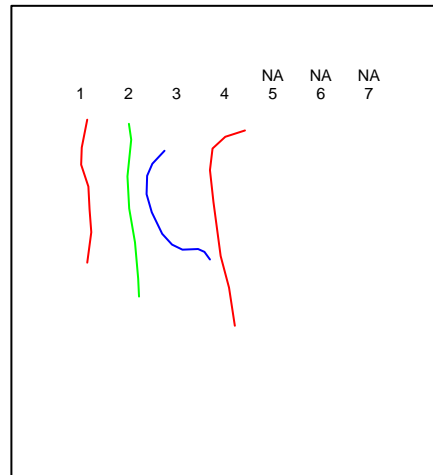

IL9-3-1 REP5 plate B – Experiment REPN5  
SiobhanMeasurements/Results\_01\_15\_15.tsv

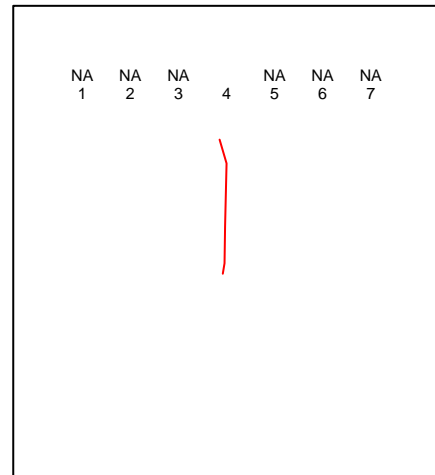

IL9-3-1 REP5 plate C – Experiment REPN5  
SiobhanMeasurements/Results\_01\_15\_15.tsv

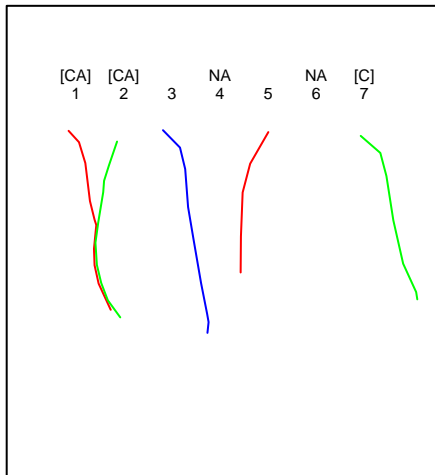

IL9-3-1 REP5 plate D – Experiment REPN5  
SiobhanMeasurements/Results\_01\_15\_15.tsv

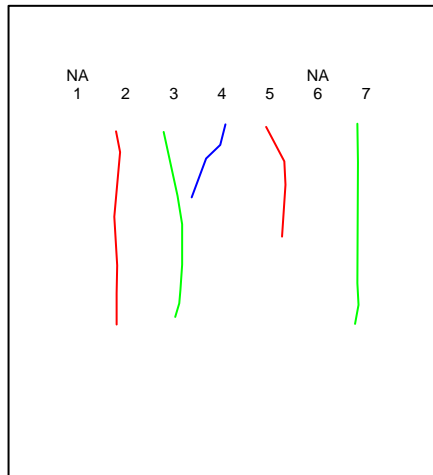

IL9-3-2 REP2 plate B – Experiment REP2  
SiobhanMeasurements/Results\_12\_29\_14.tsv

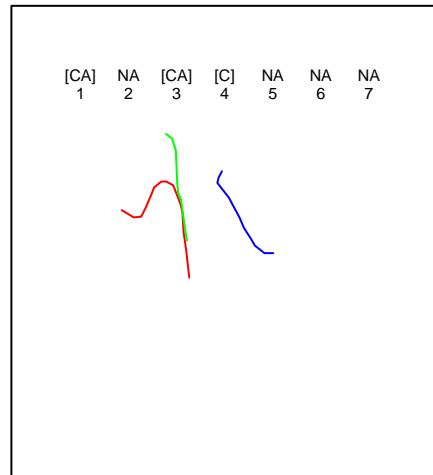

IL9-3-2 REP3 plate D – Experiment REP3  
Livingstone/roots.tsv

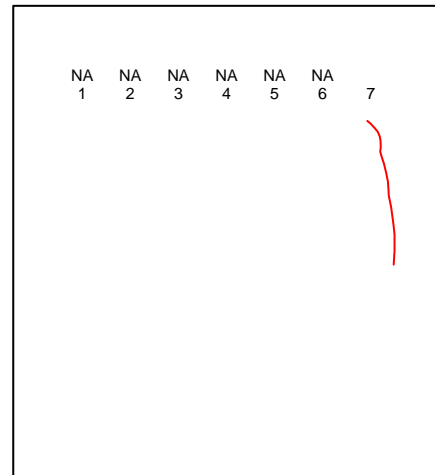

IL9-3-2 REP4 plate A – Experiment REP4  
Livingstone/roots.tsv

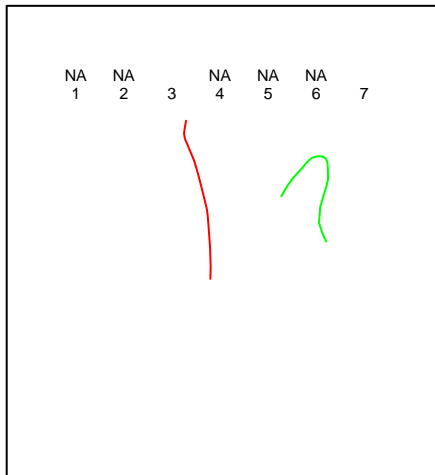

IL9-3-2 REP4 plate B – Experiment REP4  
Livingstone/roots.tsv

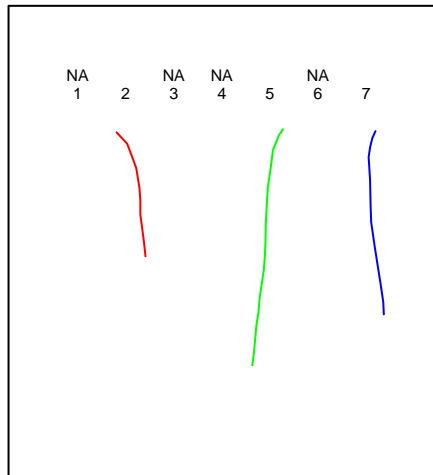

IL9-3-2 REP4 plate C – Experiment REP4  
Livingstone/roots.tsv

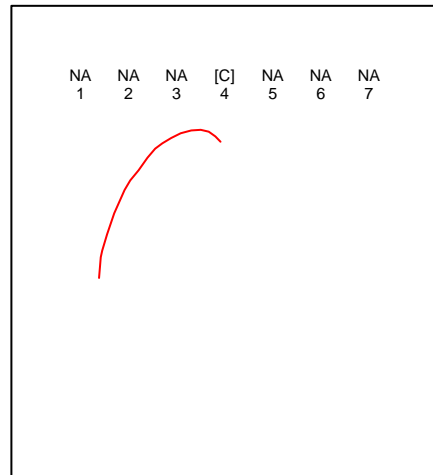

IL9-3-2 REP5 plate A – Experiment REP5  
Livingstone/roots.tsv

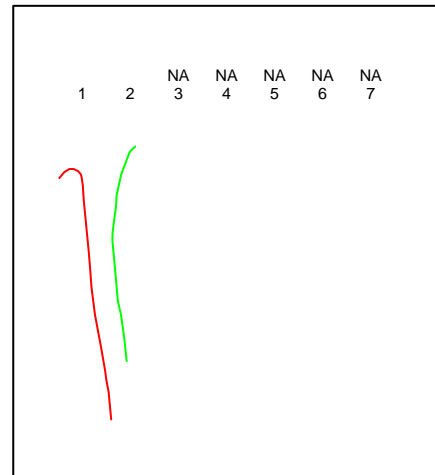

IL9-3-2 REP5 plate C – Experiment REP5  
Livingstone/roots.tsv

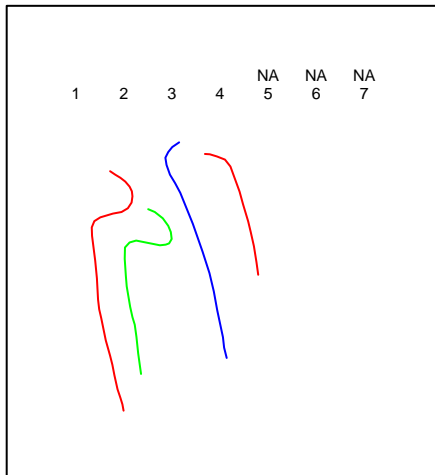

IL9-3-2 REP5 plate D – Experiment REP5  
Livingstone/roots.tsv

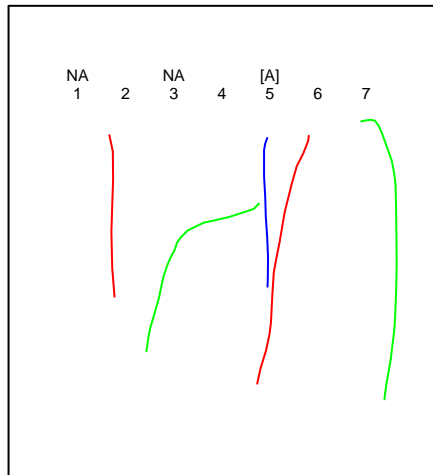

IL9-3-2 UNKN plate A – Experiment REPX1  
SiobhanMeasurements/Results\_12\_29\_14.tsv

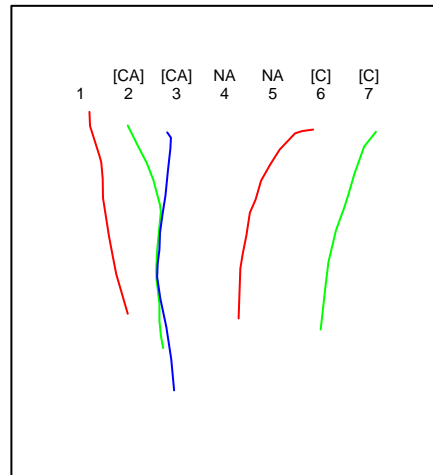

IL9-3-2 UNKN plate B – Experiment REPX1  
SiobhanMeasurements/Results\_12\_29\_14.tsv

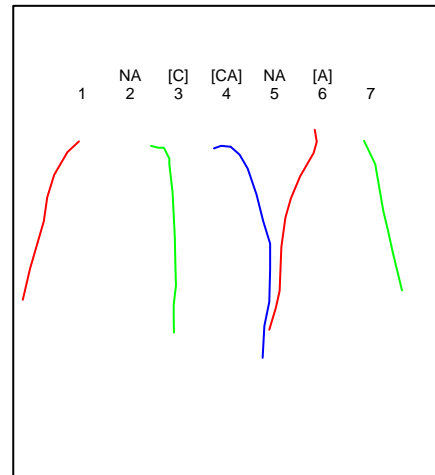

IL9-3-2 UNKN plate C – Experiment REPX1  
SiobhanMeasurements/Results\_12\_29\_14.tsv

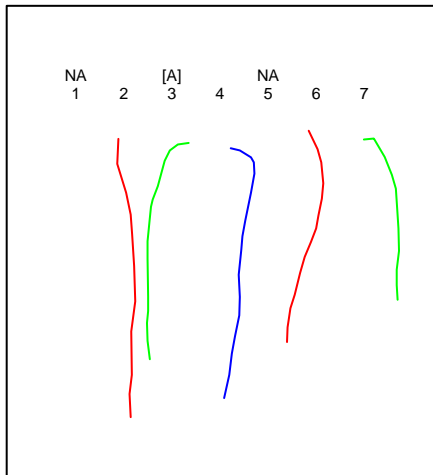

IL9-3-2 UNKN plate D – Experiment REPX1  
SiobhanMeasurements/Results\_12\_29\_14.tsv

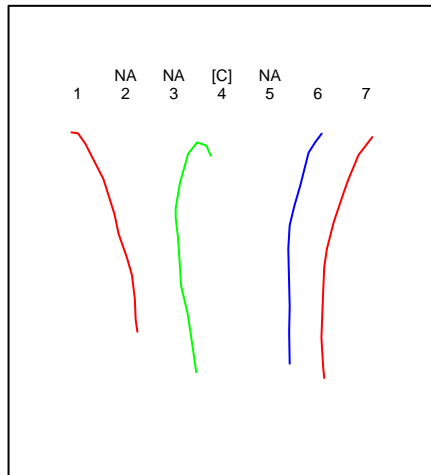

IL9-3-2 UNKN plate E – Experiment REPX1  
SiobhanMeasurements/Results\_12\_29\_14.tsv

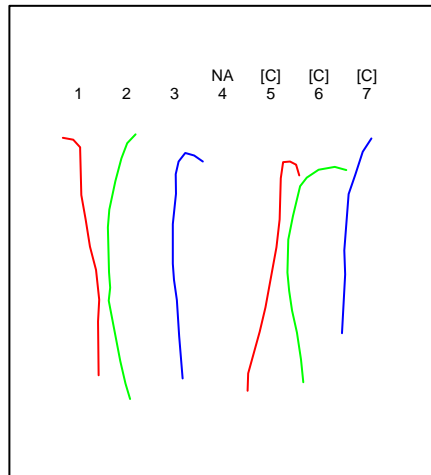

IL9-3-2 UNKN plate F – Experiment REPX1  
SiobhanMeasurements/Results\_12\_29\_14.tsv

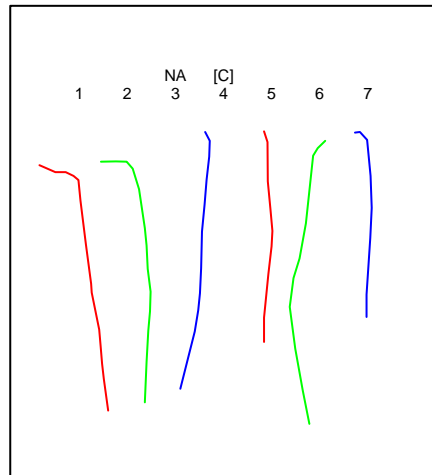

IL9-3-2 UNKN plate A – Experiment REPX4  
SiobhanMeasurements/Results\_12\_29\_14.tsv

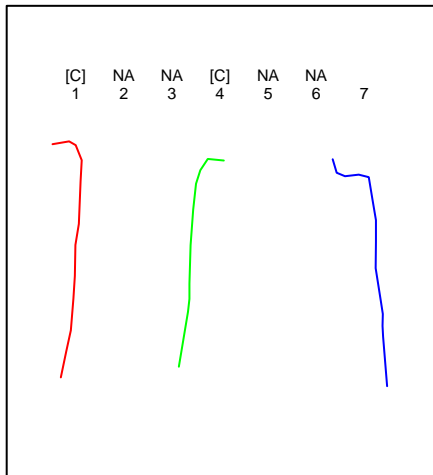

IL9-3-2 UNKN plate B – Experiment REPX4  
SiobhanMeasurements/Results\_12\_29\_14.tsv

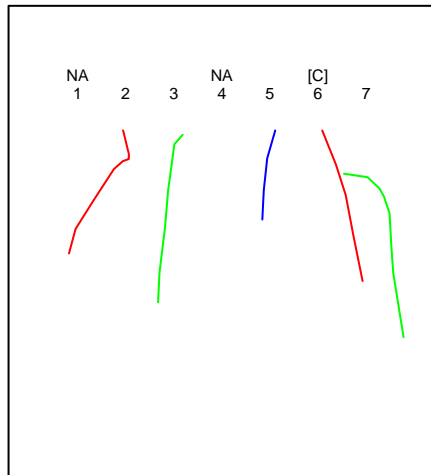

IL9-3-2 UNKN plate C – Experiment REPX4  
SiobhanMeasurements/Results\_12\_29\_14.tsv

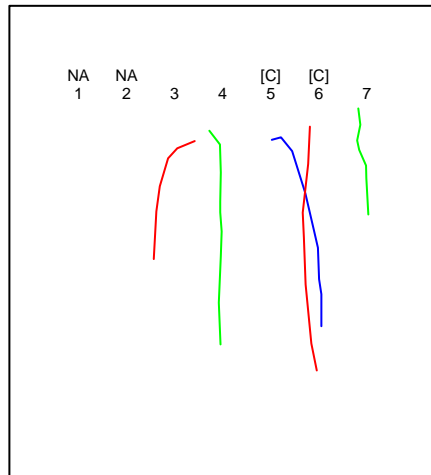

IL9-3-2 UNKN plate A – Experiment REPX5  
SiobhanMeasurements/Results\_12\_29\_14.tsv

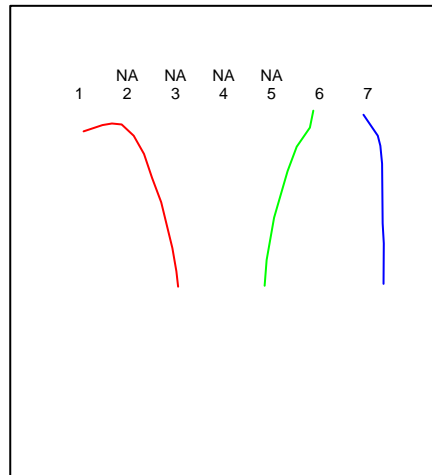

IL9-3-2 UNKN plate B – Experiment REPX5  
SiobhanMeasurements/Results\_12\_29\_14.tsv

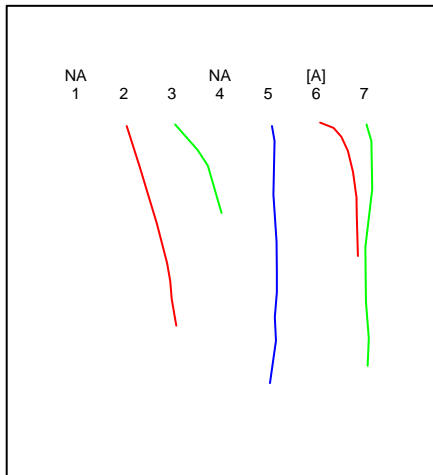

IL9-3-2 UNKN plate C – Experiment REPX5  
SiobhanMeasurements/Results\_12\_29\_14.tsv

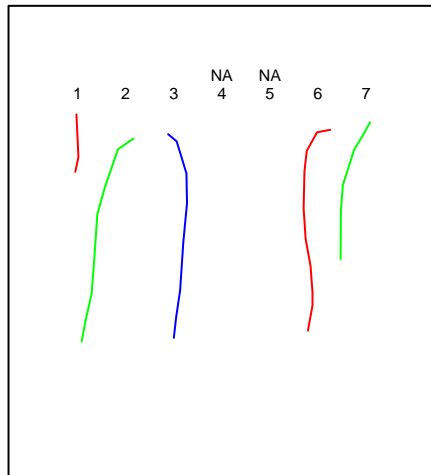

IL9-3-2 UNKN plate A – Experiment REPX6  
SiobhanMeasurements/Results\_12\_29\_14.tsv

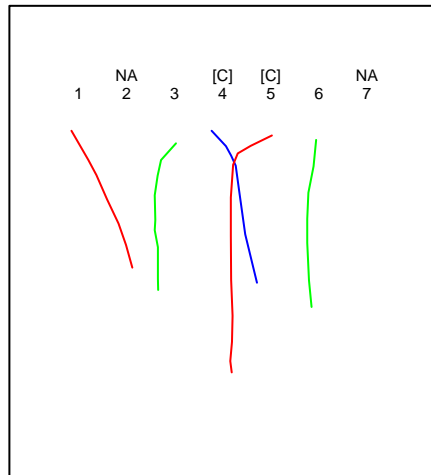

IL9-3-2 UNKN plate B – Experiment REPX6  
SiobhanMeasurements/Results\_12\_29\_14.tsv

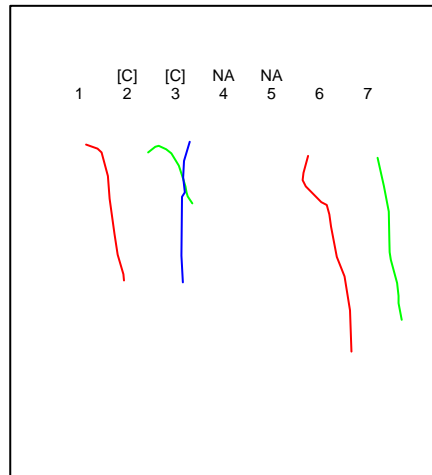

IL9-3-2 UNKN plate C – Experiment REPX6  
SiobhanMeasurements/Results\_12\_29\_14.tsv

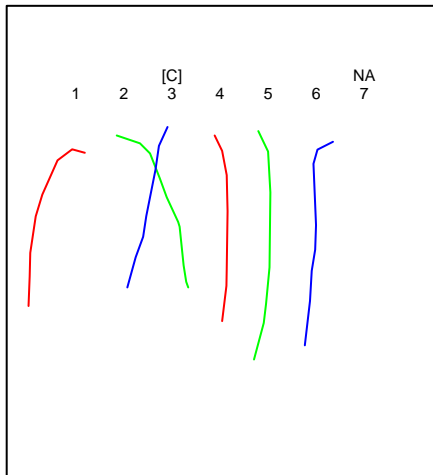

IL10-1 REP2 plate A – Experiment REP2  
SiobhanMeasurements/Results\_1\_1\_15.tsv

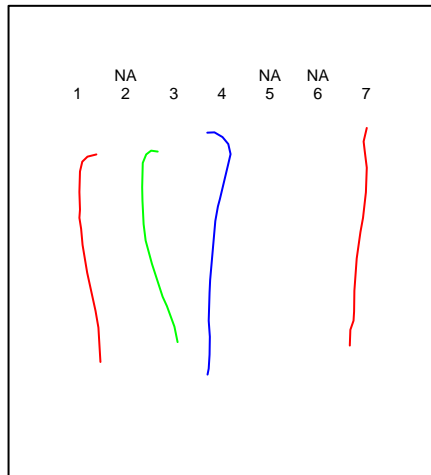

IL10-1 REP2 plate B – Experiment REP2  
SiobhanMeasurements/Results\_1\_1\_15.tsv

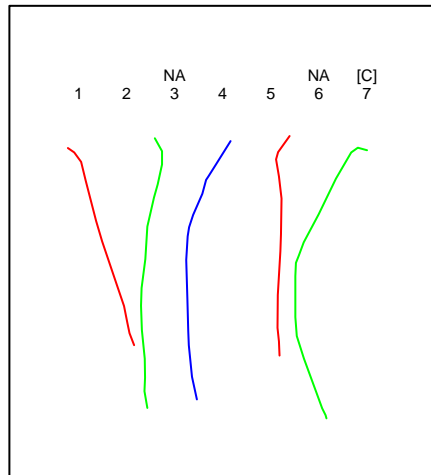

IL10-1 REP3 plate A – Experiment REP3  
SiobhanMeasurements/Results\_1\_1\_15.tsv

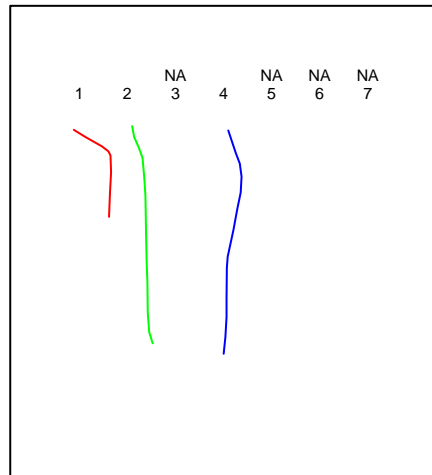

IL10-1 REP3 plate B – Experiment REP3  
SiobhanMeasurements/Results\_1\_1\_15.tsv

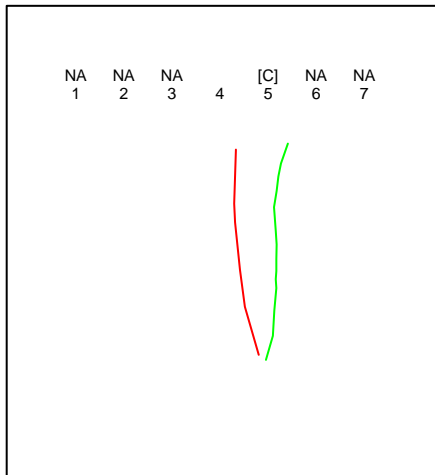

IL10-1 REP4 plate A – Experiment REP4  
SiobhanMeasurements/Results\_1\_1\_15.tsv

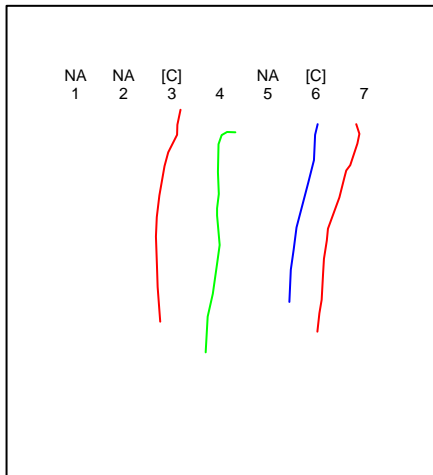

IL10-1 REP4 plate B – Experiment REP4  
SiobhanMeasurements/Results\_1\_1\_15.tsv

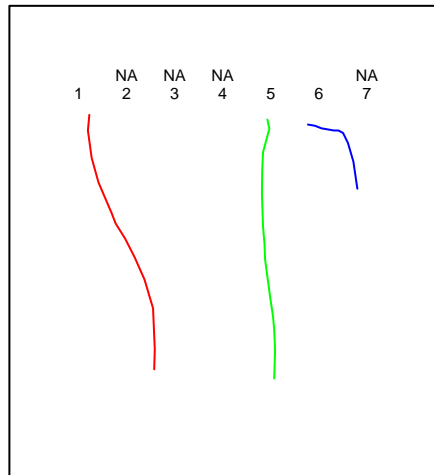

IL10-1 REP5 plate A – Experiment REP5  
SiobhanMeasurements/Results\_1\_1\_15.tsv

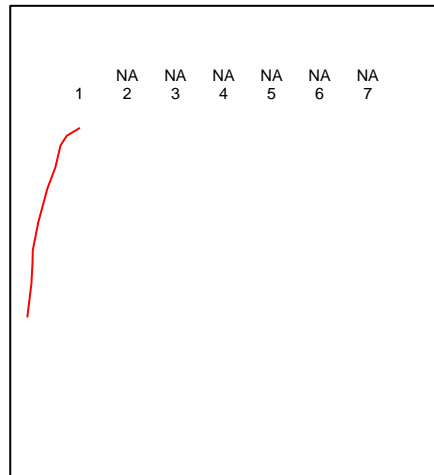

IL10-1 REP5 plate B – Experiment REP5  
SiobhanMeasurements/Results\_1\_1\_15.tsv

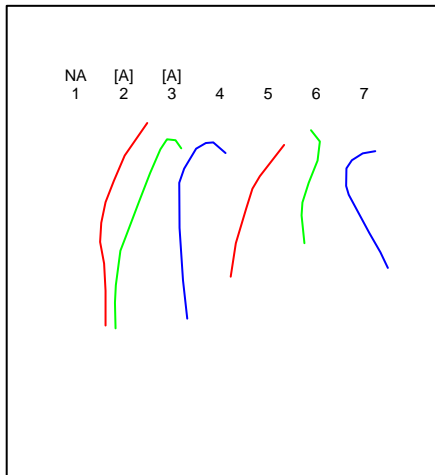

IL10-1 REP3 plate A – Experiment REPX1  
SiobhanMeasurements/Results\_1\_1\_15.tsv

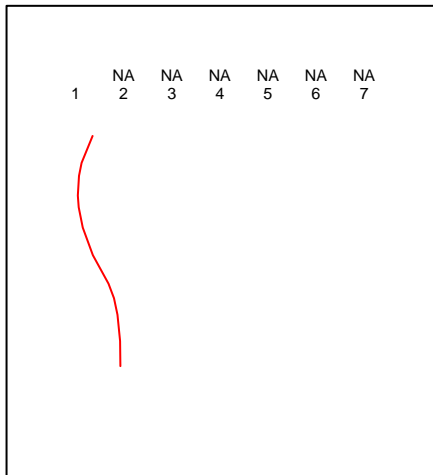

IL10-1 REP3 plate B – Experiment REPX1  
SiobhanMeasurements/Results\_1\_1\_15.tsv

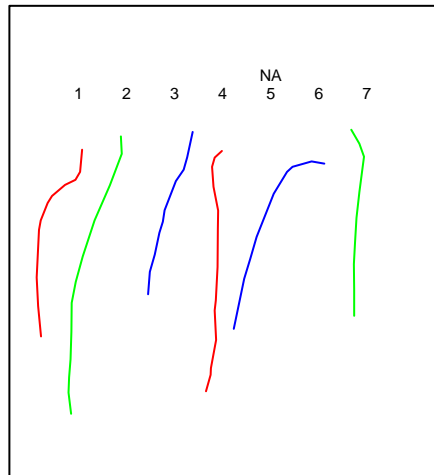

IL10-1 REP3 plate C – Experiment REPX1  
SiobhanMeasurements/Results\_1\_1\_15.tsv

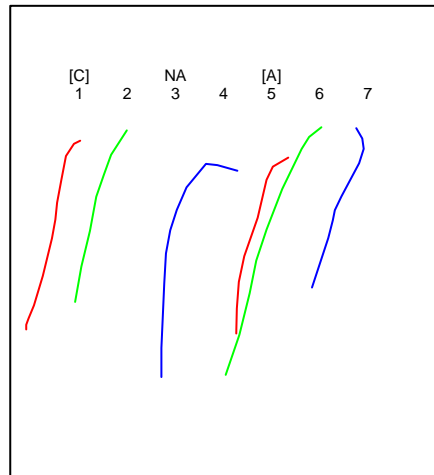

IL10-1-1 REP2 plate A – Experiment REP2  
SiobhanMeasurements/Results\_1\_1\_15.tsv

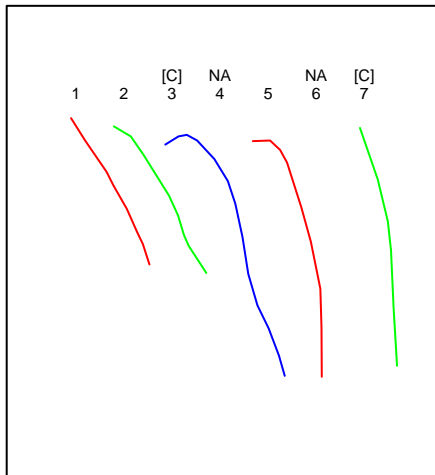

IL10-1-1 REP2 plate B – Experiment REP2  
SiobhanMeasurements/Results\_1\_1\_15.tsv

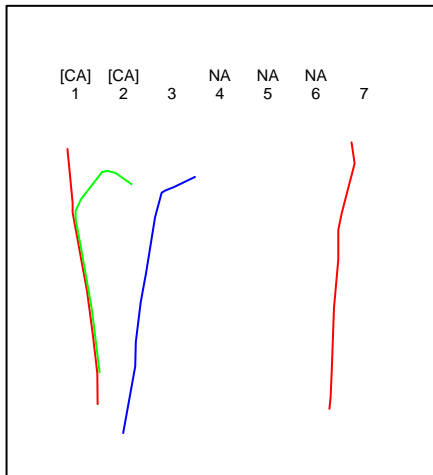

IL10-1-1 REP3 plate A – Experiment REP3  
SiobhanMeasurements/Results\_1\_1\_15.tsv

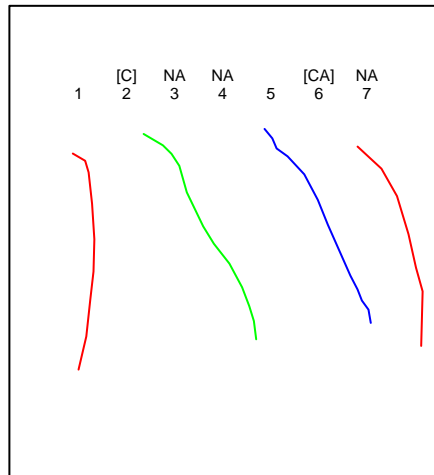

IL10-1-1 REP3 plate B – Experiment REP3  
SiobhanMeasurements/Results\_1\_1\_15.tsv

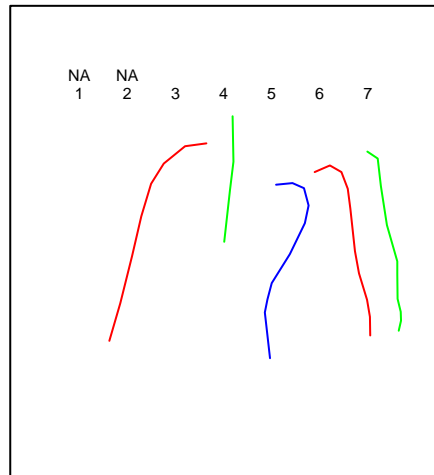

IL10-1-1 REP4 plate A – Experiment REP4  
SiobhanMeasurements/Results\_1\_1\_15.tsv

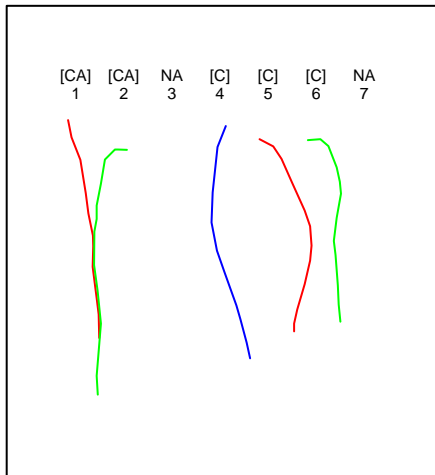

IL10-1-1 REP4 plate B – Experiment REP4  
SiobhanMeasurements/Results\_1\_1\_15.tsv

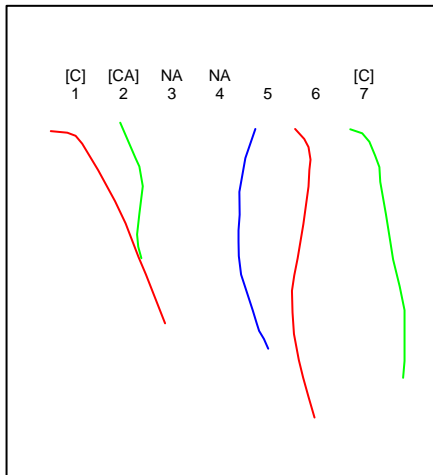

IL10-1-1 REP5 plate A – Experiment REP5  
SiobhanMeasurements/Results\_1\_1\_15.tsv

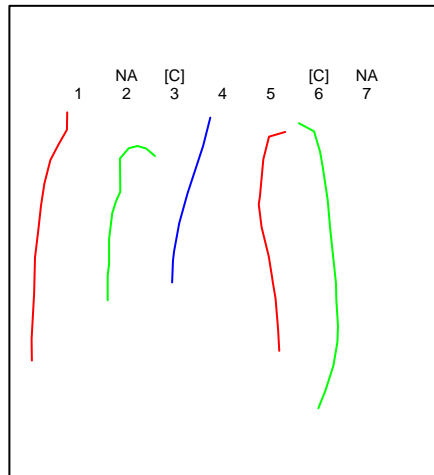

IL10-1-1 REP5 plate B – Experiment REP5  
SiobhanMeasurements/Results\_1\_1\_15.tsv

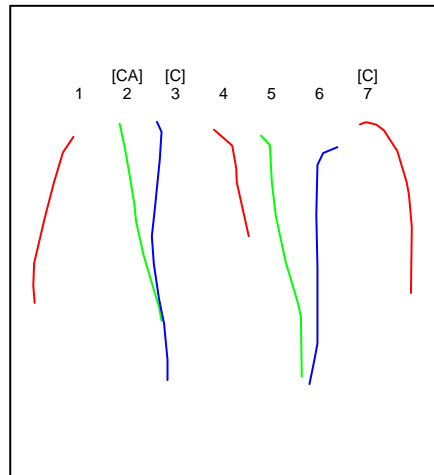

IL10-1-1 REP4 plate A – Experiment REPX1  
SiobhanMeasurements/Results\_1\_1\_15.tsv

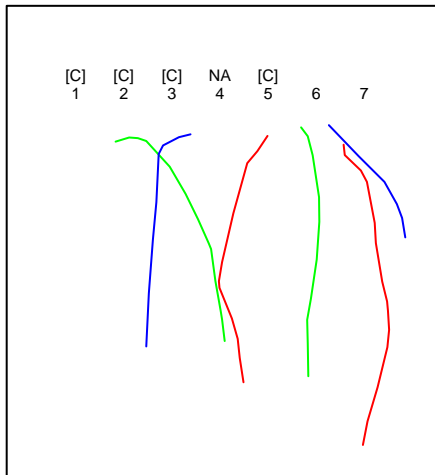

IL10-1-1 REP4 plate B – Experiment REPX1  
SiobhanMeasurements/Results\_1\_1\_15.tsv

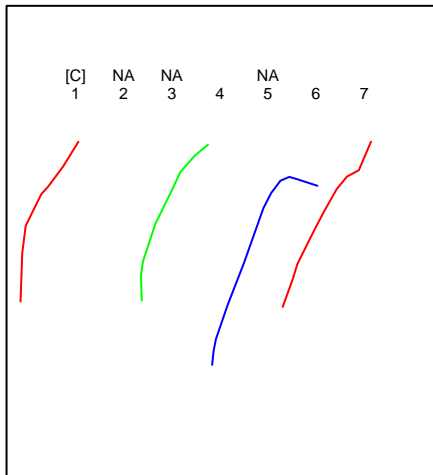

IL10-1-1 UNKN plate A – Experiment REPX2  
SiobhanMeasurements/Results\_1\_1\_15.tsv

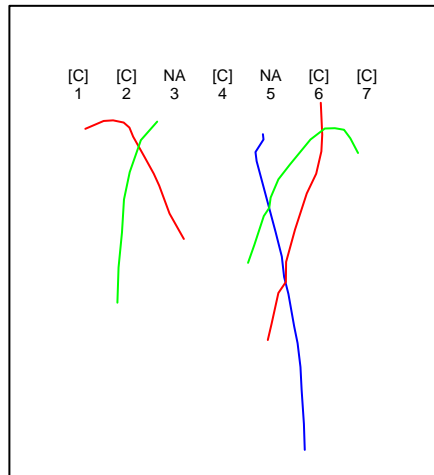

IL10-1-1 UNKN plate B – Experiment REPX2  
SiobhanMeasurements/Results\_1\_1\_15.tsv

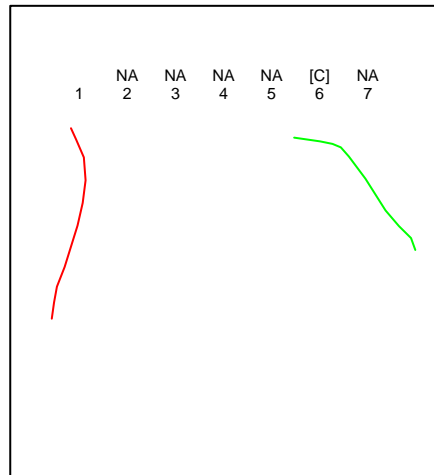

IL10-2 REP2 plate A – Experiment REP2  
SiobhanMeasurements/Results\_1\_1\_15.tsv

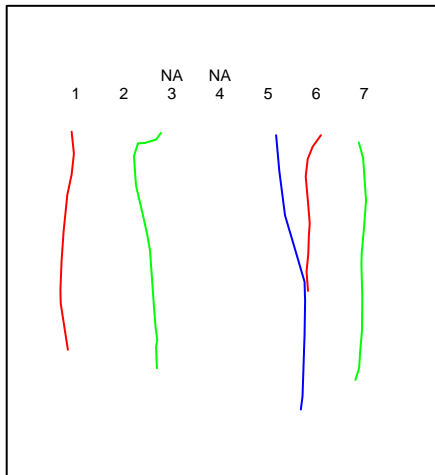

IL10-2 REP2 plate B – Experiment REP2  
SiobhanMeasurements/Results\_1\_1\_15.tsv

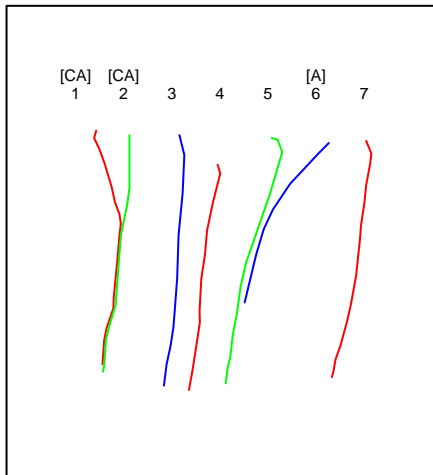

IL10-2 REP3 plate A – Experiment REP3  
SiobhanMeasurements/Results\_1\_1\_15.tsv

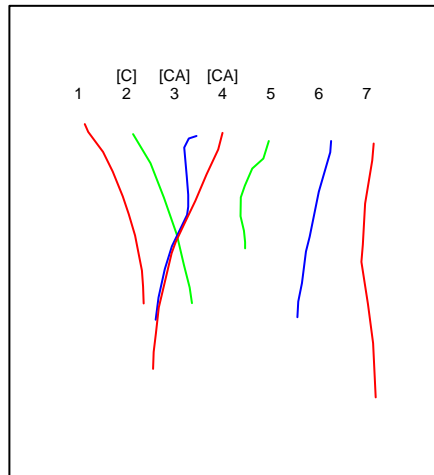

IL10-2 REP3 plate B – Experiment REP3  
SiobhanMeasurements/Results\_1\_1\_15.tsv

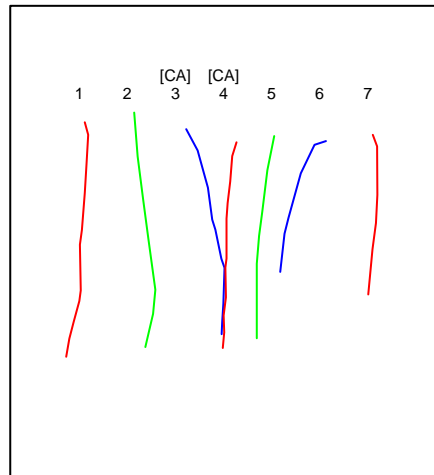

IL10-2 REP4 plate A – Experiment REP4  
SiobhanMeasurements/Results\_1\_1\_15.tsv

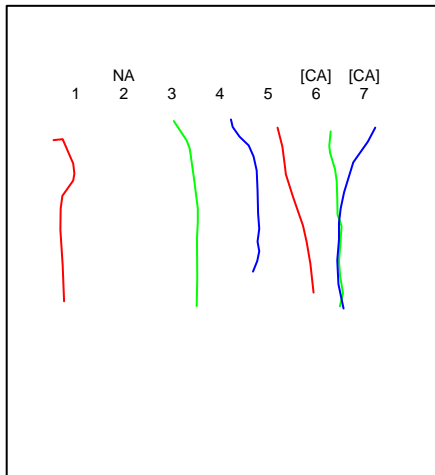

IL10-2 REP4 plate B – Experiment REP4  
SiobhanMeasurements/Results\_1\_1\_15.tsv

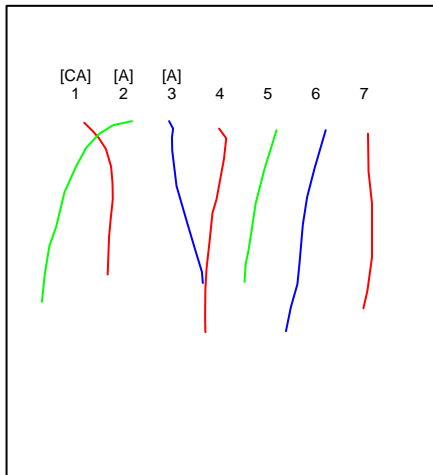

IL10-2 REP5 plate A – Experiment REP5  
SiobhanMeasurements/Results\_1\_1\_15.tsv

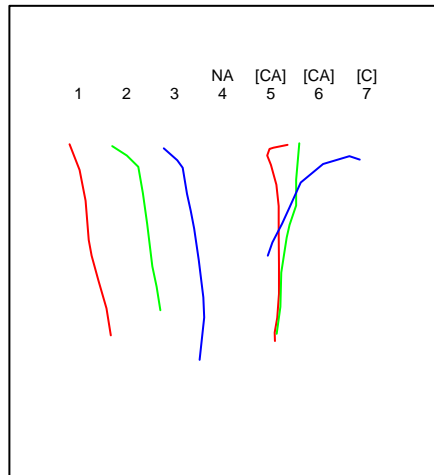

IL10-2 REP5 plate B – Experiment REP5  
SiobhanMeasurements/Results\_1\_1\_15.tsv

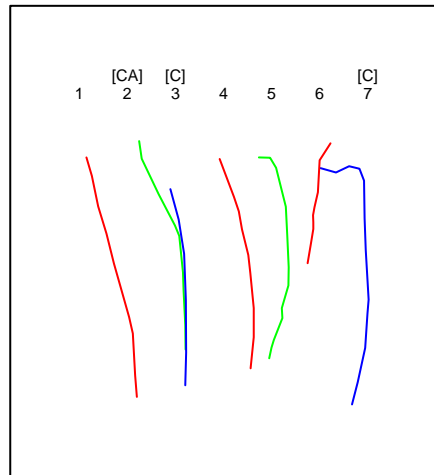

IL10-2-2 REP2 plate A – Experiment REP2  
SiobhanMeasurements/Results\_1\_1\_15.tsv

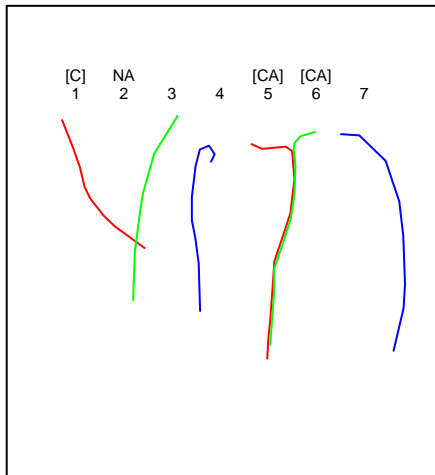

IL10-2-2 REP2 plate B – Experiment REP2  
SiobhanMeasurements/Results\_1\_1\_15.tsv

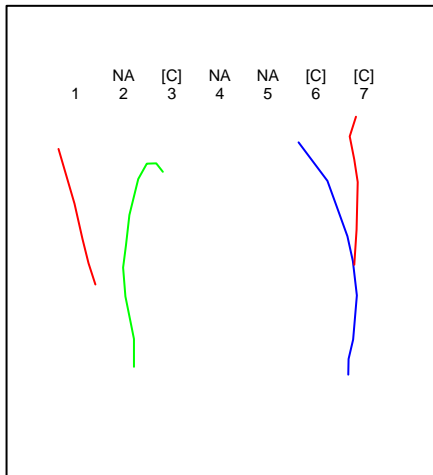

IL10-2-2 REP3 plate A – Experiment REP3  
SiobhanMeasurements/Results\_1\_1\_15.tsv

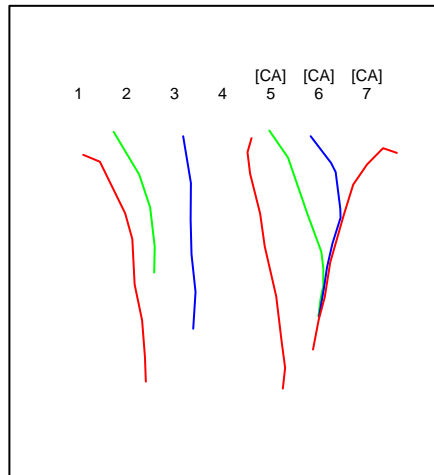

IL10-2-2 REP3 plate B – Experiment REP3  
SiobhanMeasurements/Results\_1\_1\_15.tsv

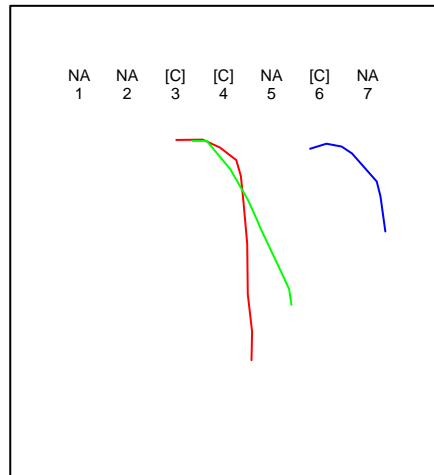

IL10-2-2 REP4 plate A – Experiment REP4  
SiobhanMeasurements/Results\_1\_1\_15.tsv

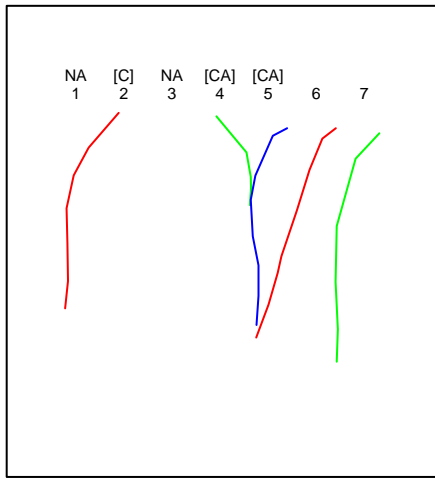

IL10-2-2 REP4 plate B – Experiment REP4  
SiobhanMeasurements/Results\_1\_1\_15.tsv

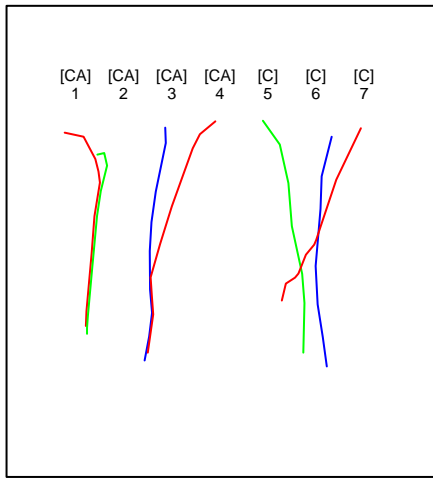

IL10-2-2 REP5 plate A – Experiment REP5  
SiobhanMeasurements/Results\_1\_1\_15.tsv

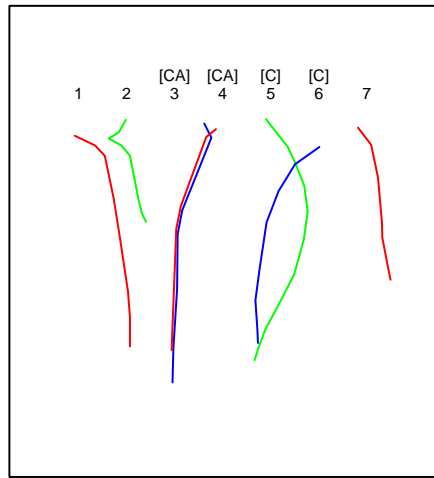

IL10-2-2 REP5 plate B – Experiment REP5  
SiobhanMeasurements/Results\_1\_1\_15.tsv

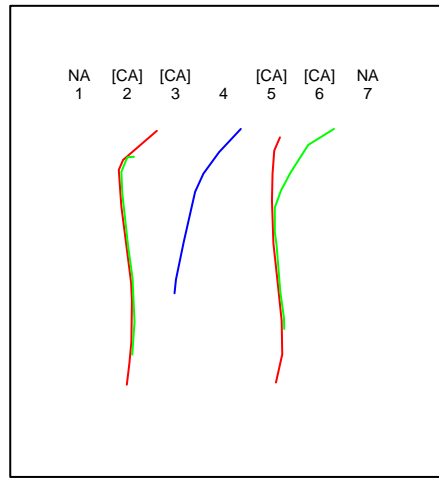

IL10-3 REP2 plate A – Experiment REP2  
Livingstone/roots.tsv

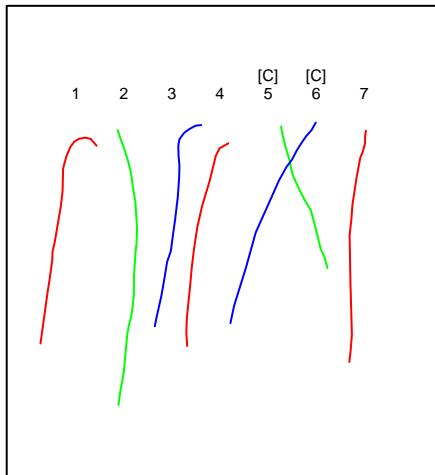

IL10-3 REP2 plate B – Experiment REP2  
Livingstone/roots.tsv

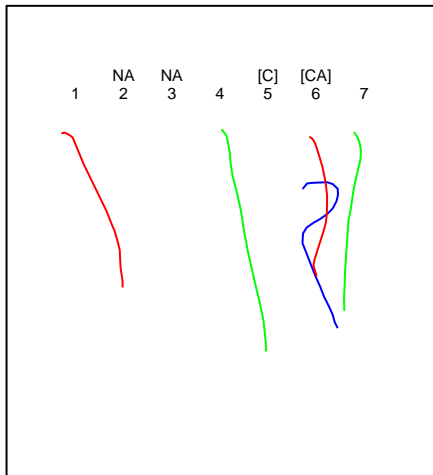

IL10-3 REP3 plate A – Experiment REP3  
Livingstone/roots.tsv

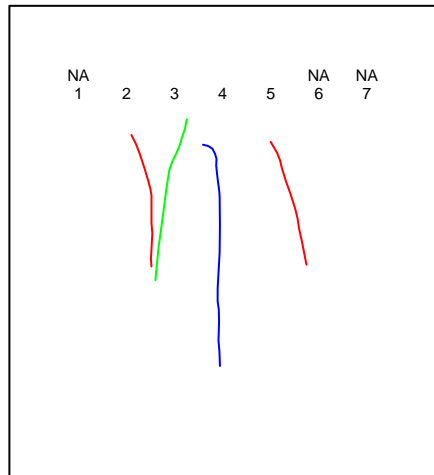

IL10-3 REP3 plate B – Experiment REP3  
Livingstone/roots.tsv

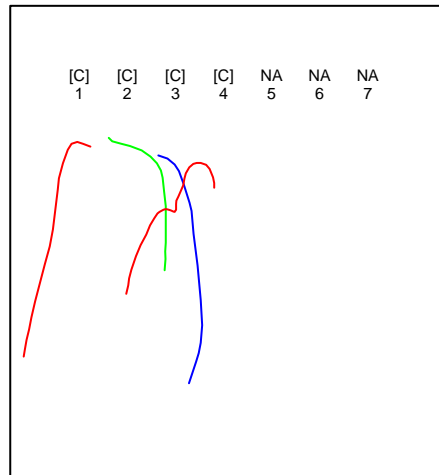

IL10-3 REP4 plate A – Experiment REP4  
SiobhanMeasurements/Results\_1\_1\_15.tsv

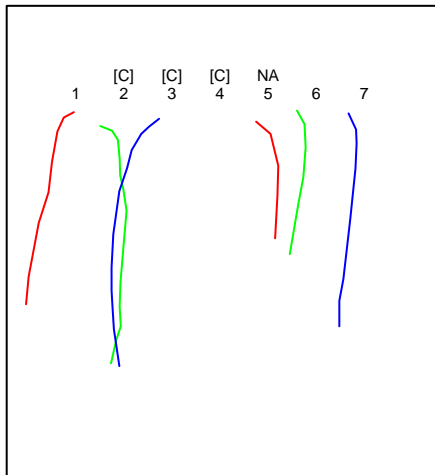

IL10-3 REP4 plate B – Experiment REP4  
SiobhanMeasurements/Results\_1\_1\_15.tsv

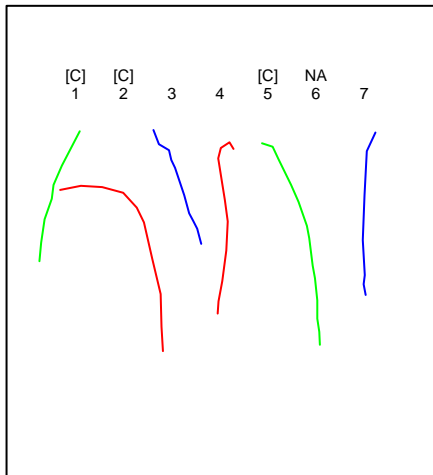

IL10-3 REP5 plate A – Experiment REP5  
SiobhanMeasurements/Results\_1\_1\_15.tsv

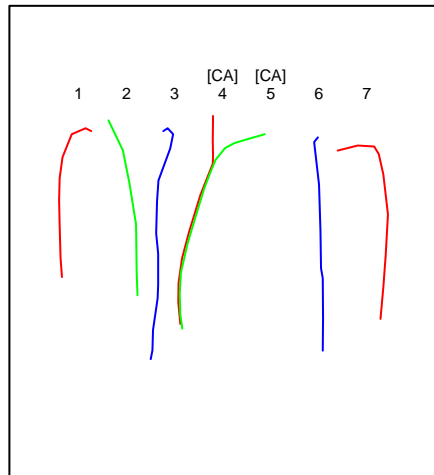

IL10-3 REP5 plate B – Experiment REP5  
SiobhanMeasurements/Results\_1\_1\_15.tsv

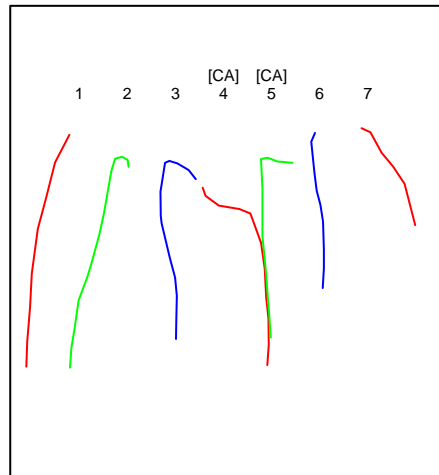

**IL11-1 REP2 plate A – Experiment REP2**  
**Livingstone/roots.tsv**

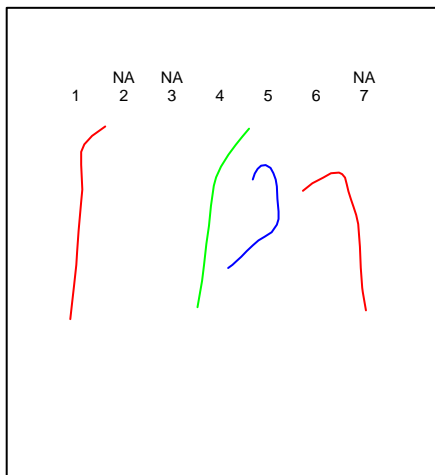

**IL11-1 REP2 plate B – Experiment REP2**  
**Livingstone/roots.tsv**

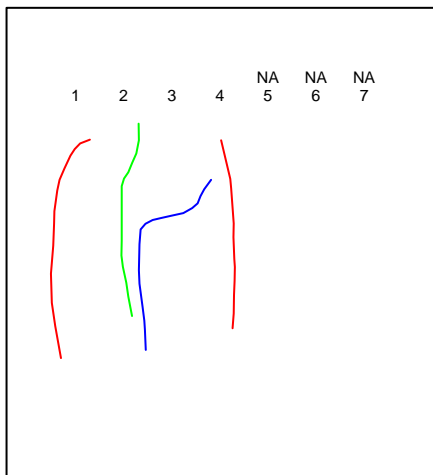

IL11-1 REP3 plate A – Experiment REP3  
Livingstone/roots.tsv

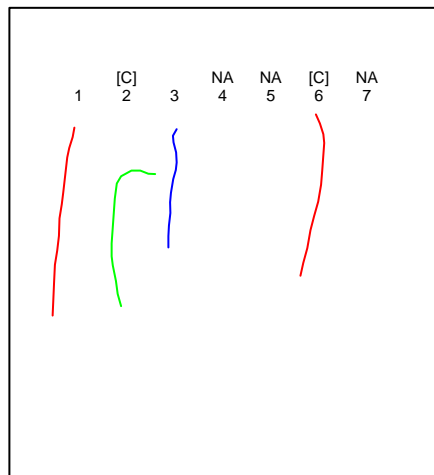

IL11-1 REP3 plate B – Experiment REP3  
Livingstone/roots.tsv

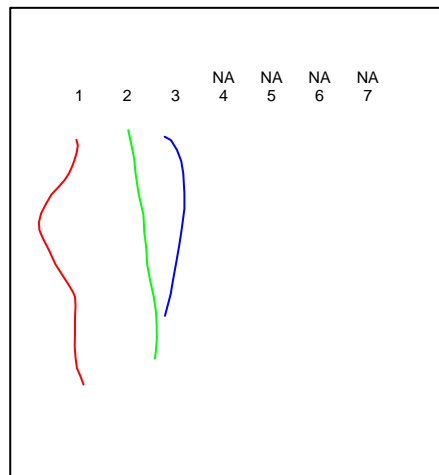

IL11-1 REP4 plate A – Experiment REP4  
SiobhanMeasurements/Results\_1\_1\_15.tsv

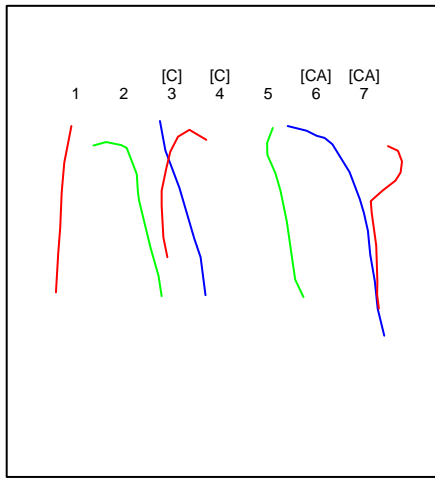

IL11-1 REP4 plate B – Experiment REP4  
SiobhanMeasurements/Results\_1\_1\_15.tsv

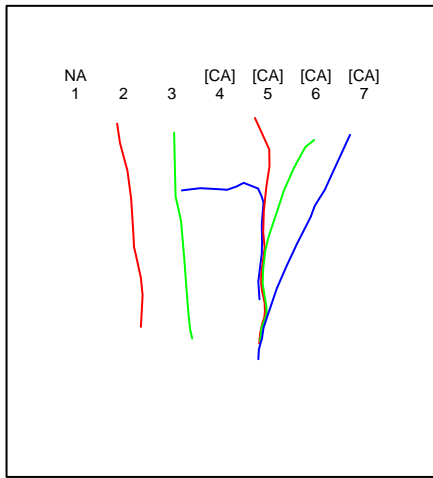

IL11-1 REP5 plate A – Experiment REP5  
SiobhanMeasurements/Results\_1\_1\_15.tsv

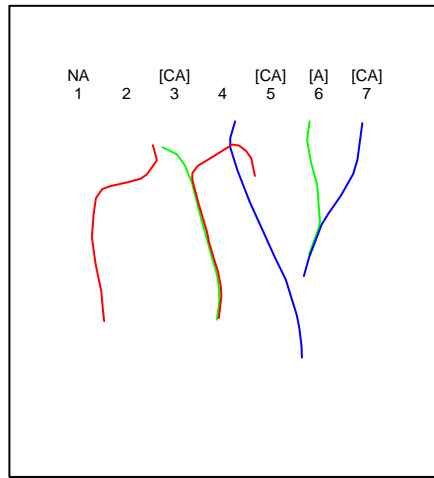

IL11-1 REP5 plate B – Experiment REP5  
SiobhanMeasurements/Results\_1\_1\_15.tsv

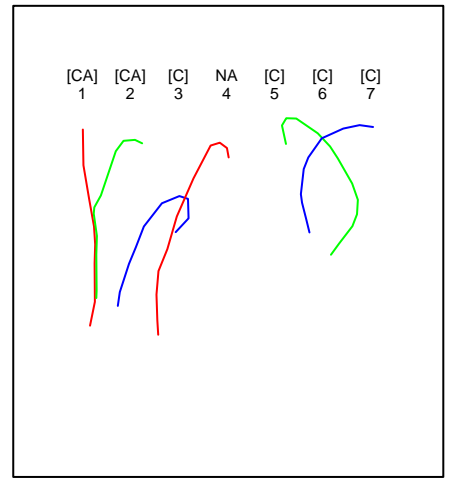

IL11-2 REP2 plate A – Experiment REP2  
SiobhanMeasurements/Results\_12\_27\_14.tsv

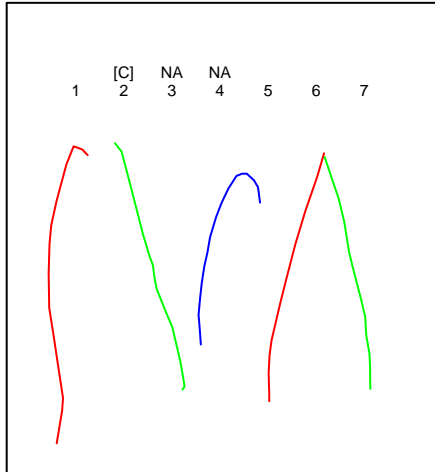

IL11-2 REP2 plate B – Experiment REP2  
SiobhanMeasurements/Results\_12\_27\_14.tsv

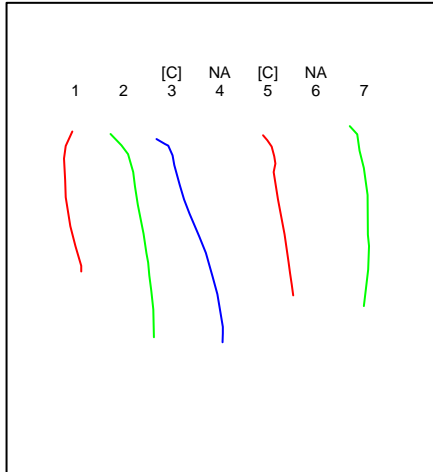

IL11-2 REP3 plate A – Experiment REP3  
SiobhanMeasurements/Results\_12\_27\_14.tsv

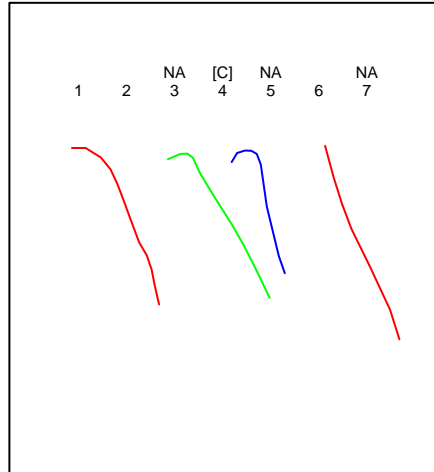

IL11-2 REP3 plate B – Experiment REP3  
SiobhanMeasurements/Results\_12\_27\_14.tsv

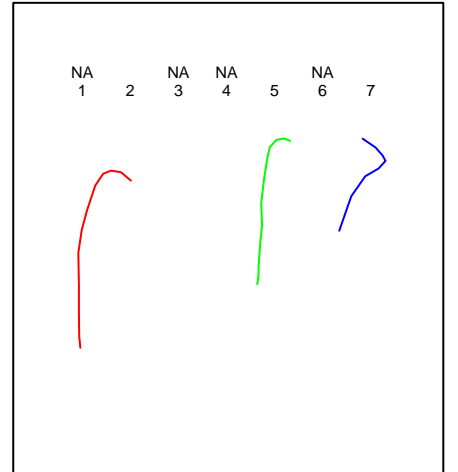

IL11-2 REP4 plate A – Experiment REP4  
SiobhanMeasurements/Results\_12\_27\_14.tsv

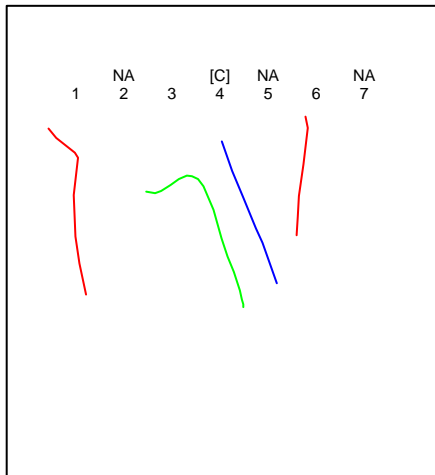

IL11-2 REP4 plate B – Experiment REP4  
SiobhanMeasurements/Results\_12\_27\_14.tsv

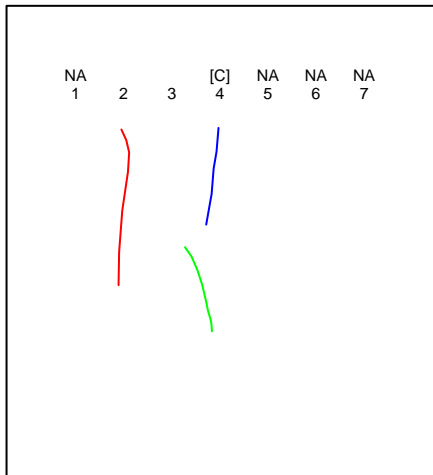

IL11-2 REP5 plate A – Experiment REP5  
SiobhanMeasurements/Results\_12\_27\_14.tsv

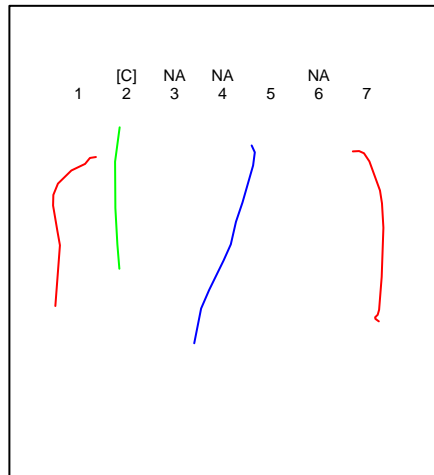

IL11-2 REP5 plate B – Experiment REP5  
SiobhanMeasurements/Results\_12\_27\_14.tsv

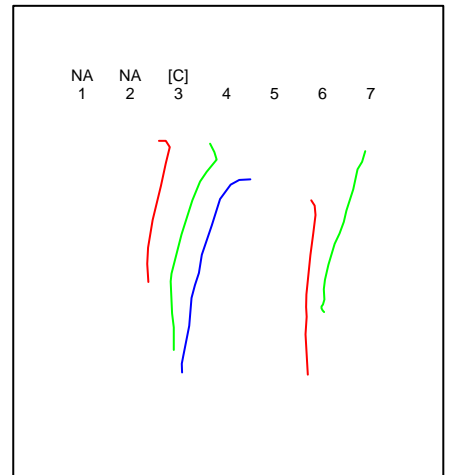

IL11-2 UNKN plate A – Experiment REPX1  
SiobhanMeasurements/Results\_12\_27\_14.tsv

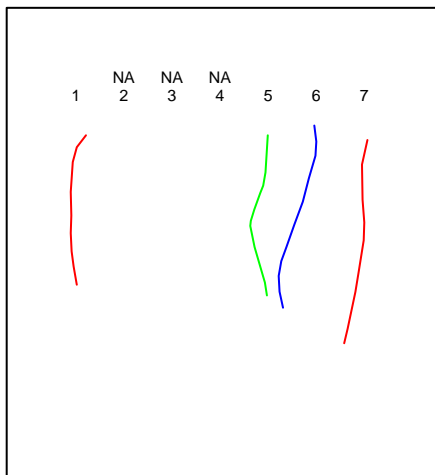

IL11-2 UNKN plate B – Experiment REPX1  
SiobhanMeasurements/Results\_12\_27\_14.tsv

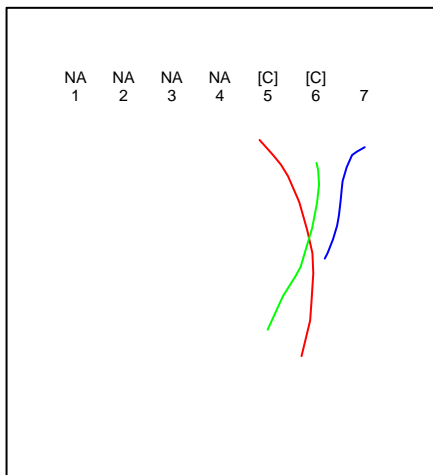

IL11-2 UNKN plate C – Experiment REPX1  
SiobhanMeasurements/Results\_12\_27\_14.tsv

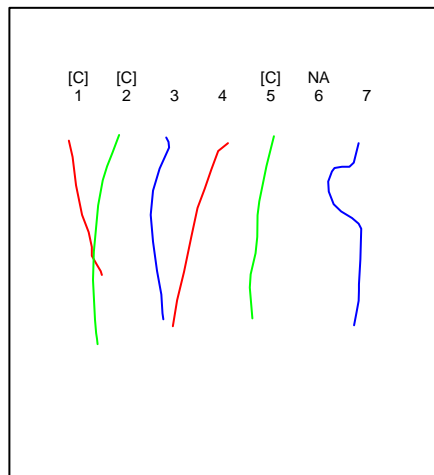

IL11-2 UNKN plate D – Experiment REPX1  
SiobhanMeasurements/Results\_12\_27\_14.tsv

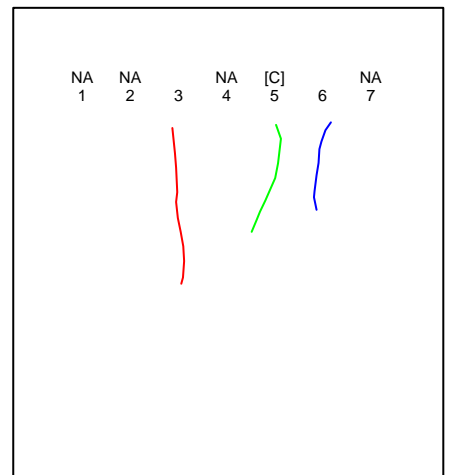

IL11-2 UNKN plate E – Experiment REPX1  
SiobhanMeasurements/Results\_12\_27\_14.tsv

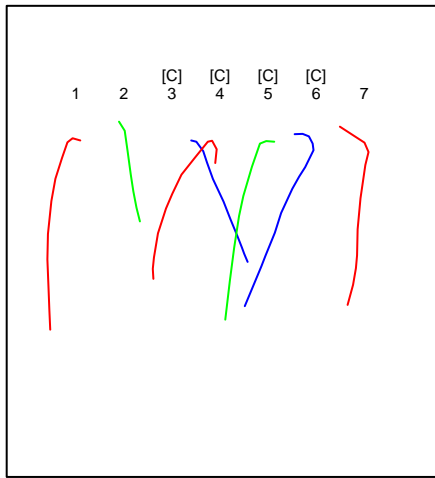

IL11-2 UNKN plate A – Experiment REPX2  
SiobhanMeasurements/Results\_12\_27\_14.tsv

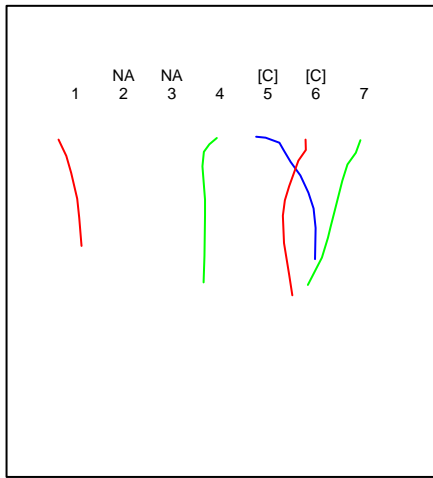

IL11-2 UNKN plate B – Experiment REPX2  
SiobhanMeasurements/Results\_12\_27\_14.tsv

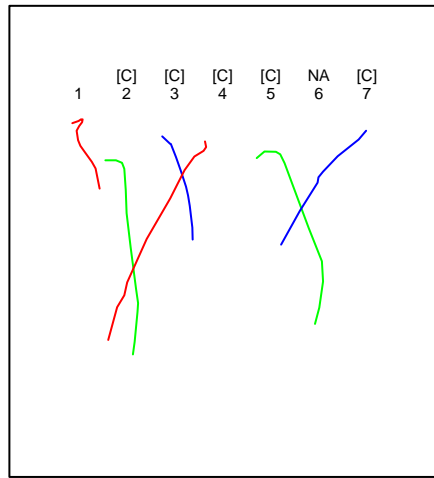

IL11-2 UNKN plate C – Experiment REPX2  
SiobhanMeasurements/Results\_12\_27\_14.tsv

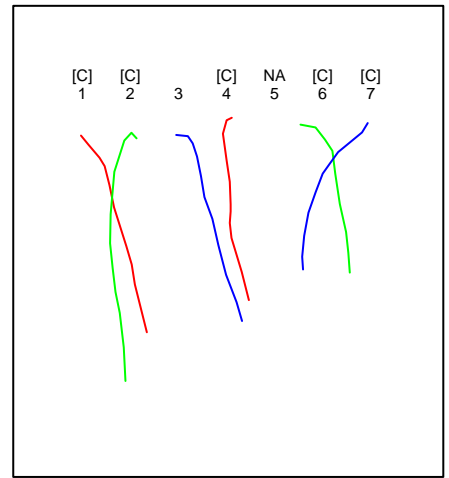

IL11-3 REP2 plate A – Experiment REP2  
SiobhanMeasurements/Results\_12\_29\_14.tsv

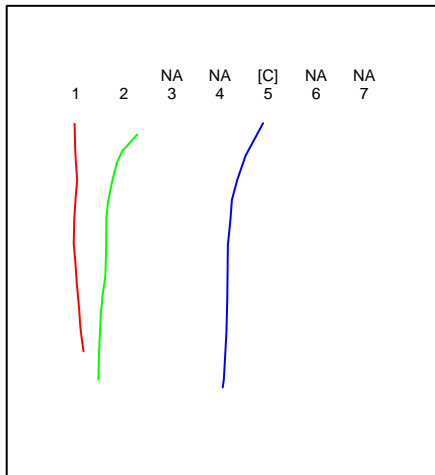

IL11-3 REP2 plate B – Experiment REP2  
SiobhanMeasurements/Results\_12\_29\_14.tsv

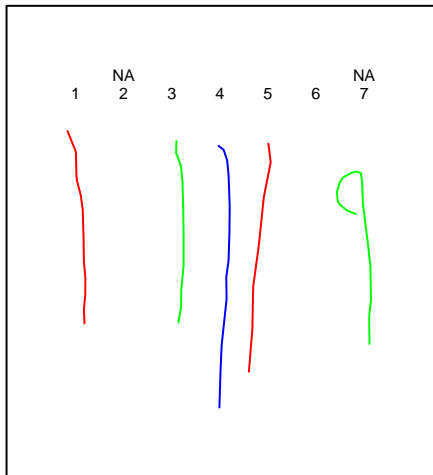

IL11-3 REP3 plate A – Experiment REP3  
SiobhanMeasurements/Results\_12\_29\_14.tsv

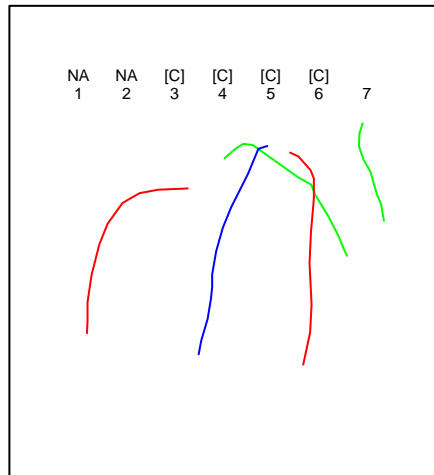

IL11-3 REP3 plate B – Experiment REP3  
SiobhanMeasurements/Results\_12\_29\_14.tsv

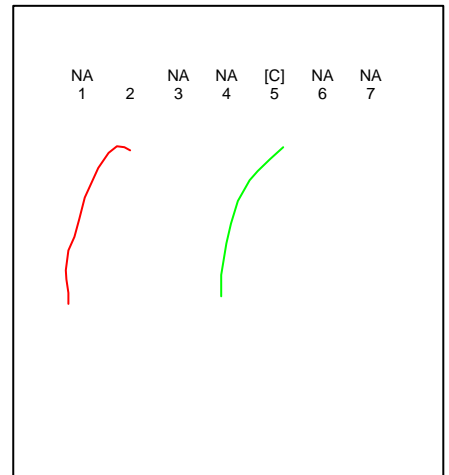

IL11-3 REP4 plate A – Experiment REP4  
SiobhanMeasurements/Results\_12\_29\_14.tsv

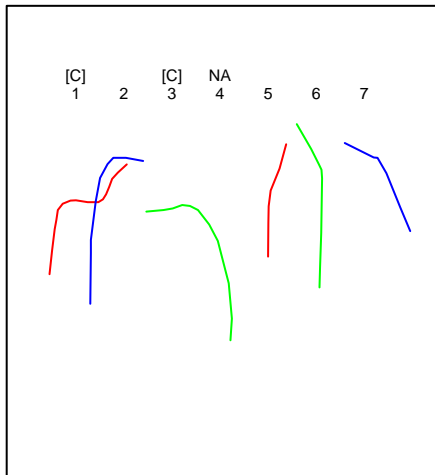

IL11-3 REP4 plate B – Experiment REP4  
SiobhanMeasurements/Results\_12\_29\_14.tsv

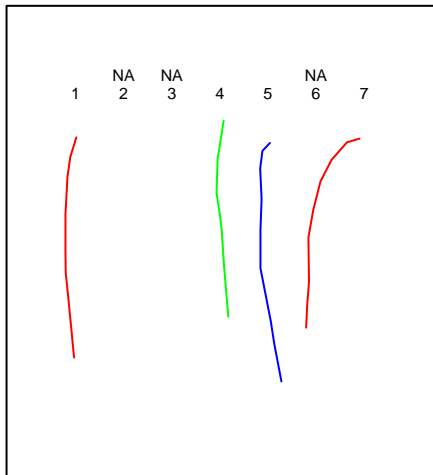

IL11-3 REP5 plate A – Experiment REP5  
SiobhanMeasurements/Results\_12\_29\_14.tsv

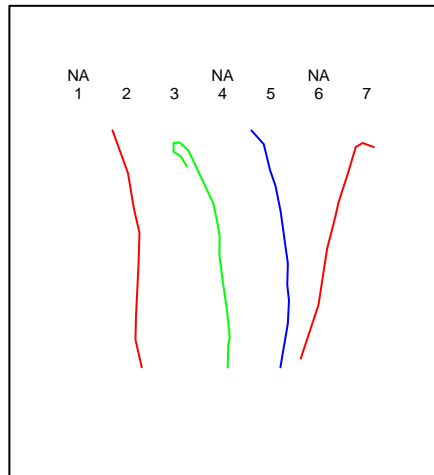

IL11-3 REP5 plate B – Experiment REP5  
SiobhanMeasurements/Results\_12\_29\_14.tsv

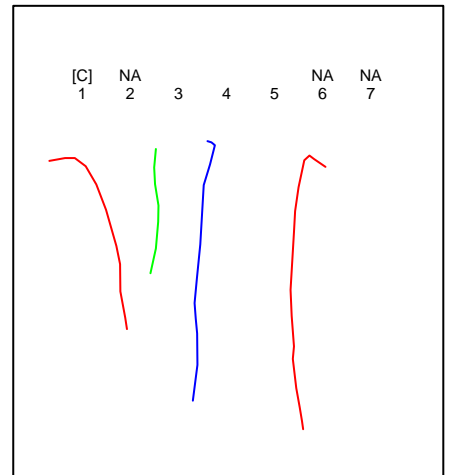

IL11-4 REP2 plate A – Experiment REP2  
Livingstone/roots.tsv

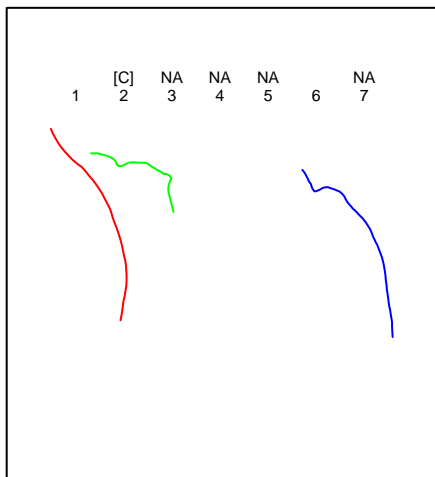

IL11-4 REP2 plate B – Experiment REP2  
Livingstone/roots.tsv

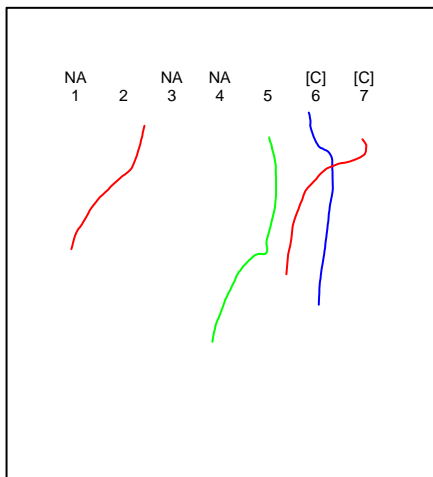

IL11-4 REP3 plate A – Experiment REP3  
Livingstone/roots.tsv

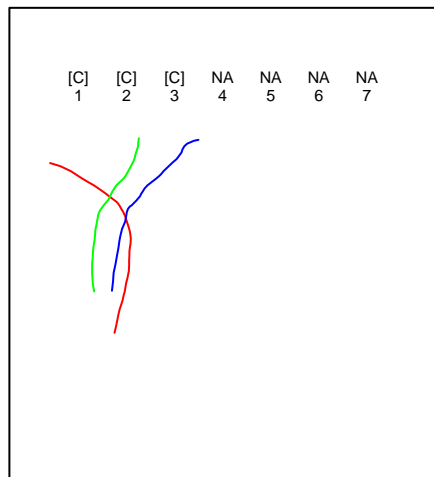

IL11-4 REP3 plate B – Experiment REP3  
Livingstone/roots.tsv

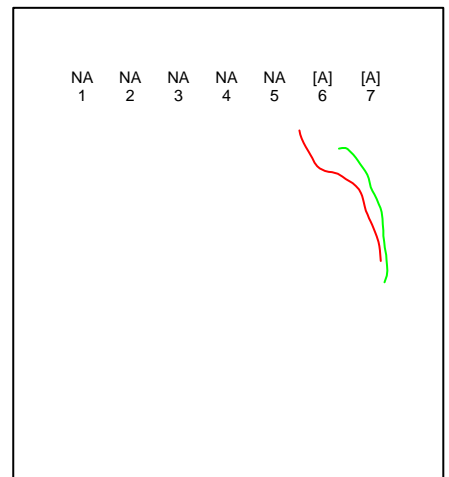

IL11-4 REP4 plate A – Experiment REP4  
Livingstone/roots.tsv

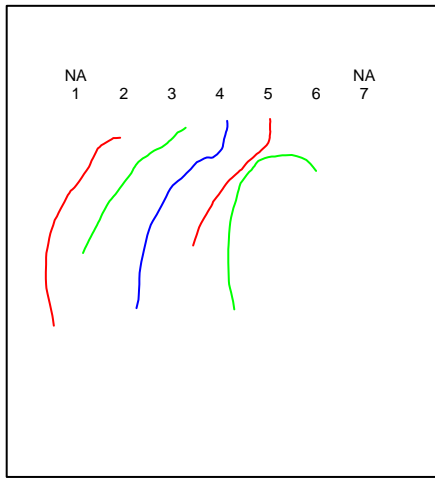

IL11-4 REP4 plate B – Experiment REP4  
Livingstone/roots.tsv

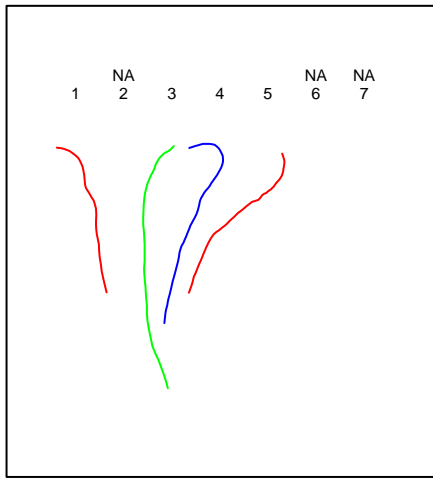

IL11-4 REP5 plate A – Experiment REP5  
Livingstone/roots.tsv

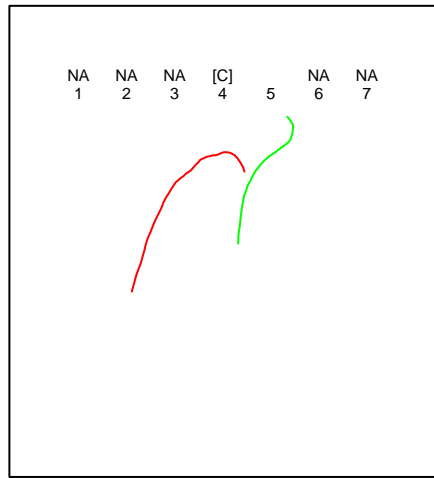

IL11-4 REP5 plate B – Experiment REP5  
Livingstone/roots.tsv

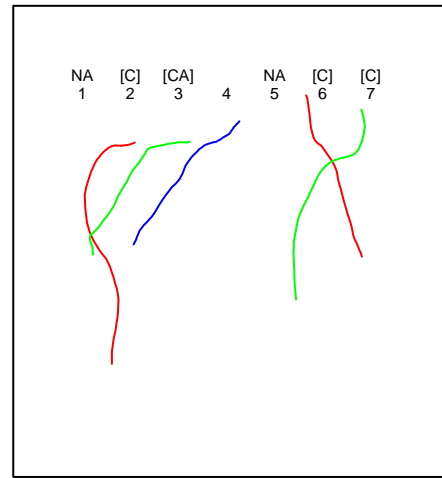

IL11-4-1 REP5 plate A – Experiment REP5  
SiobhanMeasurements/Results\_1\_1\_15.tsv

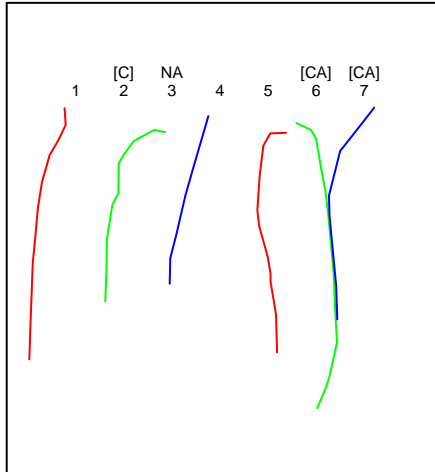

IL11-4-1 REP5 plate B – Experiment REP5  
SiobhanMeasurements/Results\_1\_1\_15.tsv

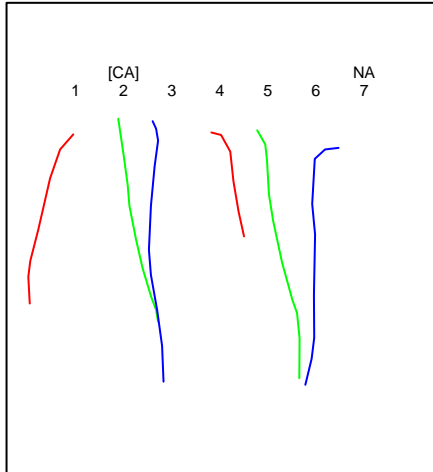

IL12-1 REP2 plate A – Experiment REP2  
SiobhanMeasurements/Results\_1\_1\_15.tsv

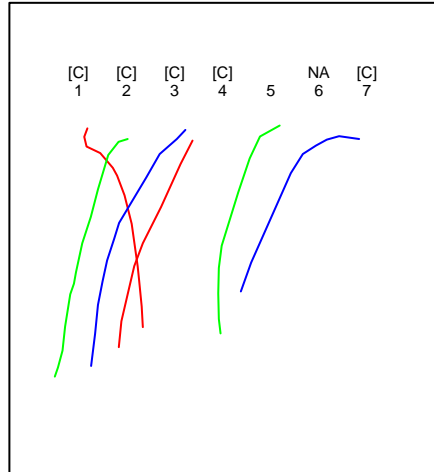

IL12-1 REP2 plate B – Experiment REP2  
SiobhanMeasurements/Results\_1\_1\_15.tsv

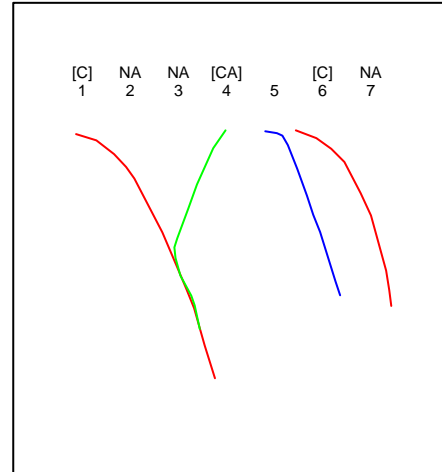

IL12-1 REP3 plate A – Experiment REP3  
SiobhanMeasurements/Results\_1\_1\_15.tsv

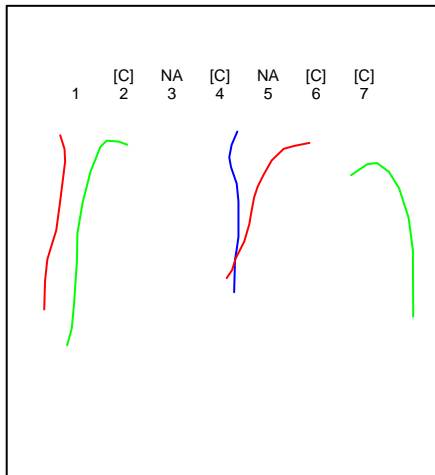

IL12-1 REP3 plate B – Experiment REP3  
SiobhanMeasurements/Results\_1\_1\_15.tsv

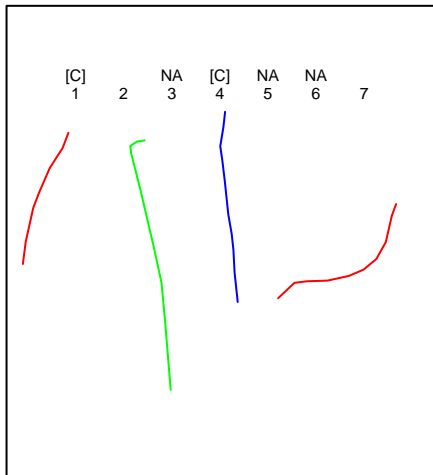

IL12-1 REP4 plate A – Experiment REP4  
SiobhanMeasurements/Results\_1\_1\_15.tsv

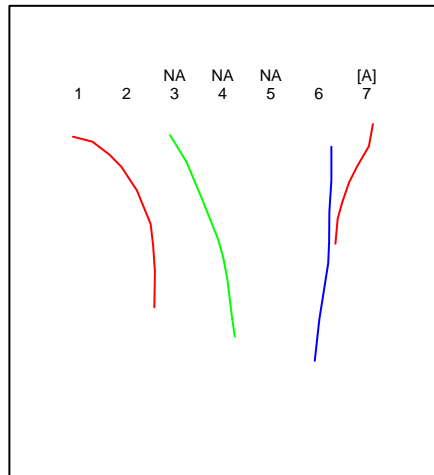

IL12-1 REP4 plate B – Experiment REP4  
SiobhanMeasurements/Results\_1\_1\_15.tsv

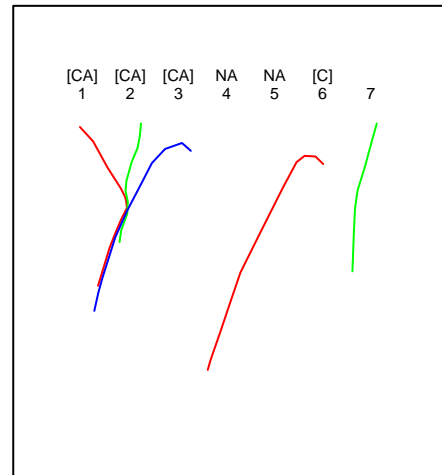

IL12-1 REP5 plate A – Experiment REP5  
SiobhanMeasurements/Results\_1\_1\_15.tsv

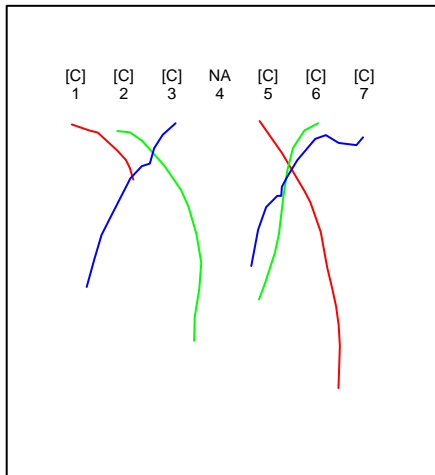

IL12-1 REP5 plate B – Experiment REP5  
SiobhanMeasurements/Results\_1\_1\_15.tsv

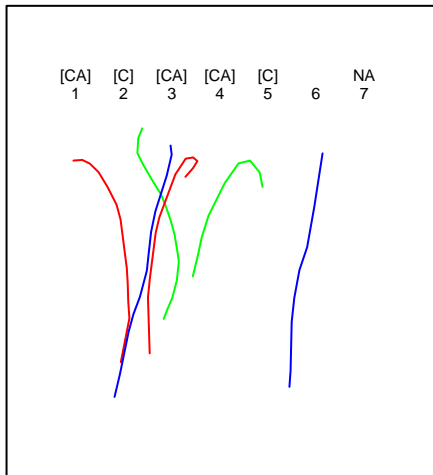

IL12-1-1 REP2 plate A – Experiment REPX1  
SiobhanMeasurements/Results\_1\_1\_15.tsv

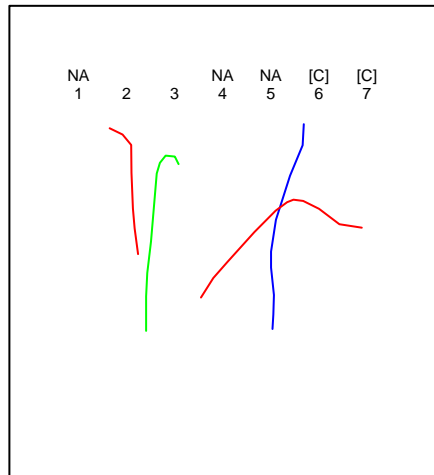

IL12-1-1 REP2 plate B – Experiment REPX1  
SiobhanMeasurements/Results\_1\_1\_15.tsv

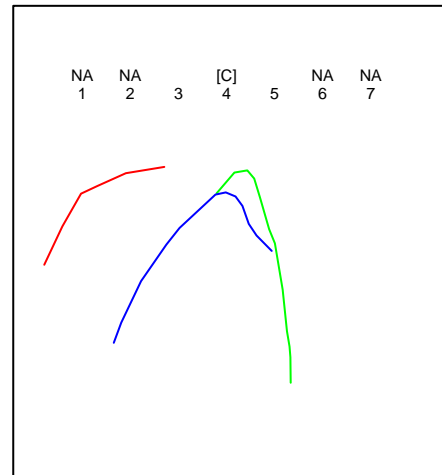

IL12-1-1 REP2 plate C – Experiment REPX1  
SiobhanMeasurements/Results\_1\_1\_15.tsv

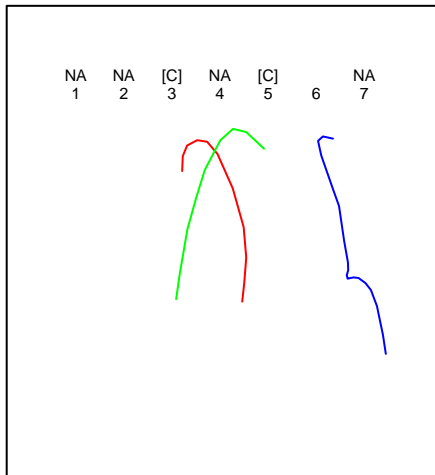

IL12-2 REP2 plate A – Experiment REP2  
SiobhanMeasurements/Siobhan\_Results\_11\_27.tsv

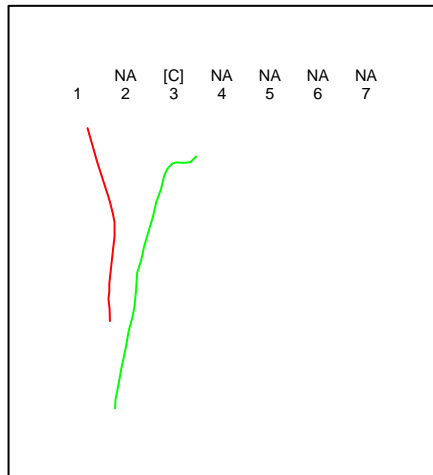

IL12-2 REP2 plate B – Experiment REP2  
SiobhanMeasurements/Siobhan\_Results\_11\_27.tsv

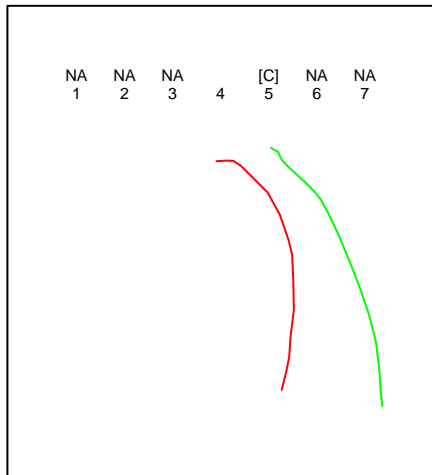

IL12-2 REP4 plate A – Experiment REP4  
SiobhanMeasurements/Siobhan\_Results\_11\_27.tsv

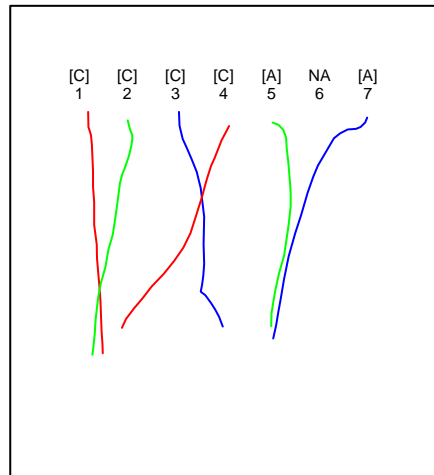

IL12-2 REP4 plate B – Experiment REP4  
SiobhanMeasurements/Siobhan\_Results\_11\_27.tsv

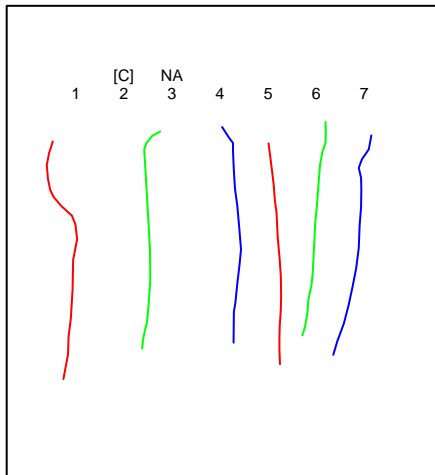

IL12-2 REP5 plate A – Experiment REP5  
SiobhanMeasurements/Siobhan\_Results\_11\_27.tsv

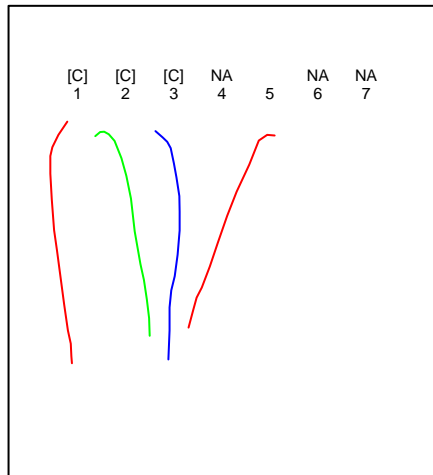

IL12-2 REP5 plate B – Experiment REP5  
SiobhanMeasurements/Siobhan\_Results\_11\_27.tsv

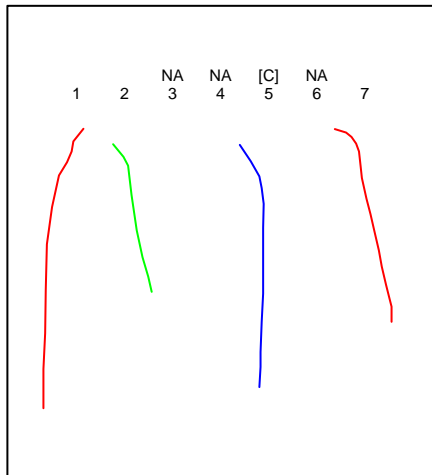

IL12-3 REP2 plate A – Experiment REPN2  
SiobhanMeasurements/Results\_01\_15\_15.tsv

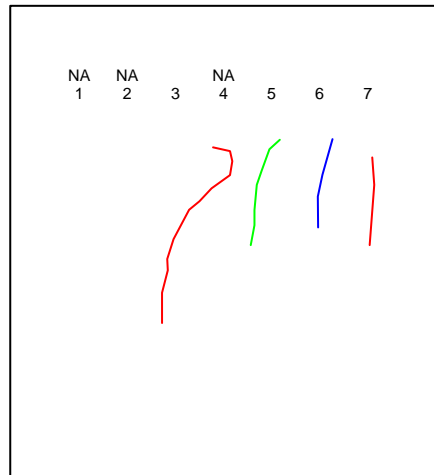

IL12-3 REP2 plate B – Experiment REPN2  
SiobhanMeasurements/Results\_01\_15\_15.tsv

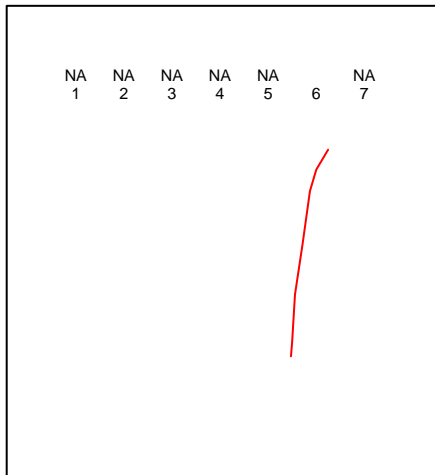

IL12-3 REP3 plate A – Experiment REPN3  
SiobhanMeasurements/Results\_01\_15\_15.tsv

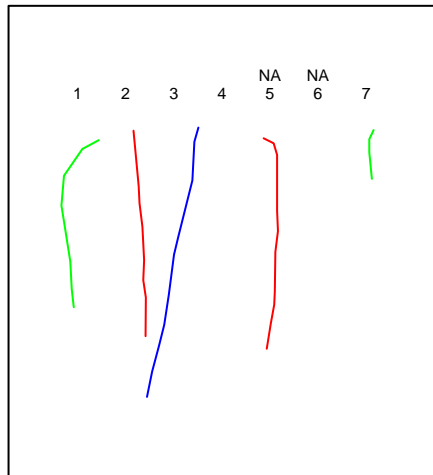

IL12-3 REP3 plate B – Experiment REPN3  
SiobhanMeasurements/Results\_01\_15\_15.tsv

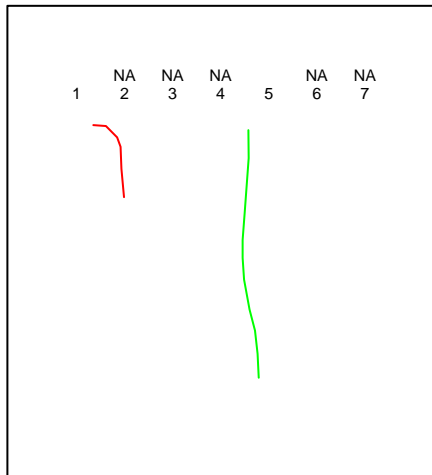

IL12-3 REP4 plate A – Experiment REPN4  
SiobhanMeasurements/Results\_01\_15\_15.tsv

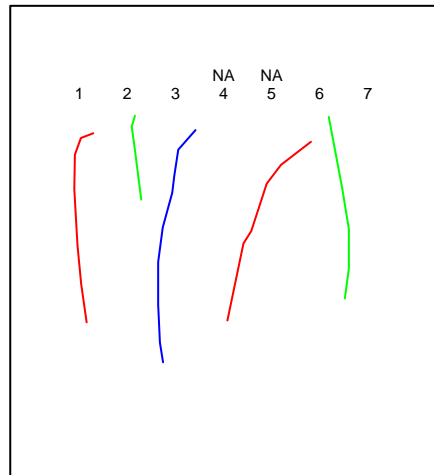

IL12-3 REP4 plate B – Experiment REPN4  
SiobhanMeasurements/Results\_01\_15\_15.tsv

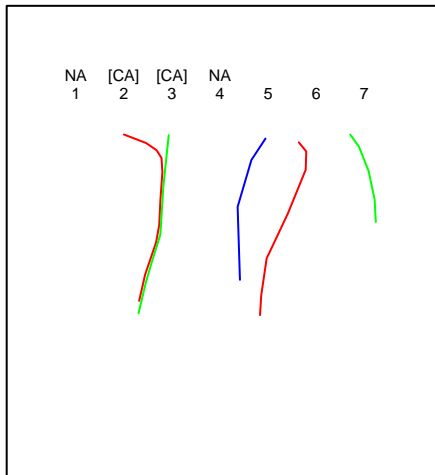

IL12-3 REP5 plate A – Experiment REPN5  
SiobhanMeasurements/Results\_01\_15\_15.tsv

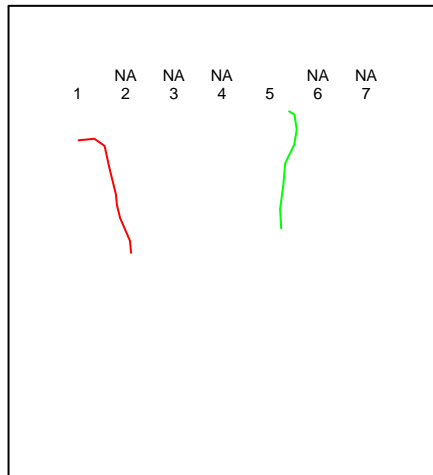

IL12-3 REP5 plate B – Experiment REPN5  
SiobhanMeasurements/Results\_01\_15\_15.tsv

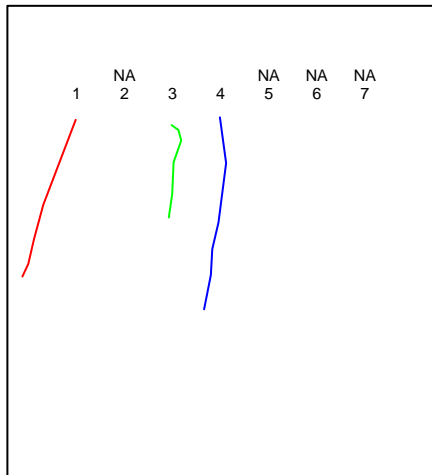

IL12-3-1 REP2 plate A – Experiment REP2  
SiobhanMeasurements/Results\_12\_28\_14.tsv

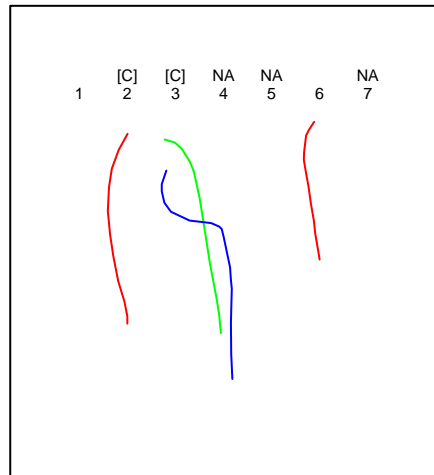

IL12-3-1 REP2 plate B – Experiment REP2  
SiobhanMeasurements/Results\_12\_28\_14.tsv

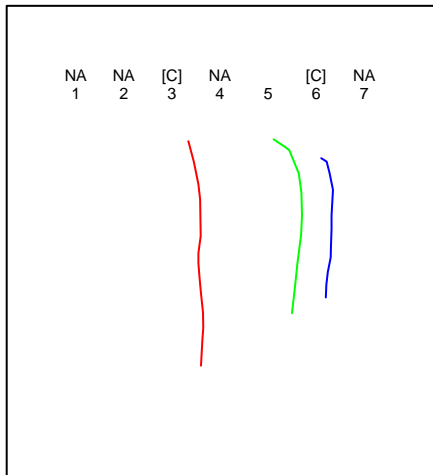

IL12-3-1 REP3 plate A – Experiment REP3  
SiobhanMeasurements/Results\_12\_28\_14.tsv

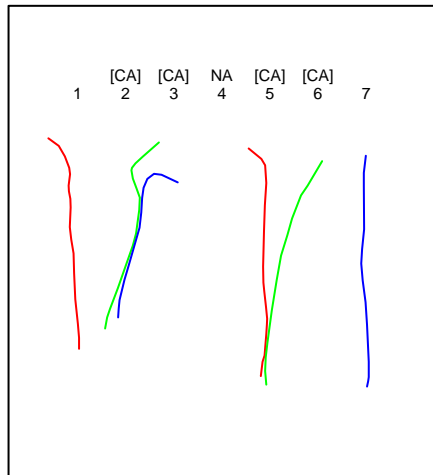

IL12-3-1 REP3 plate B – Experiment REP3  
SiobhanMeasurements/Results\_12\_28\_14.tsv

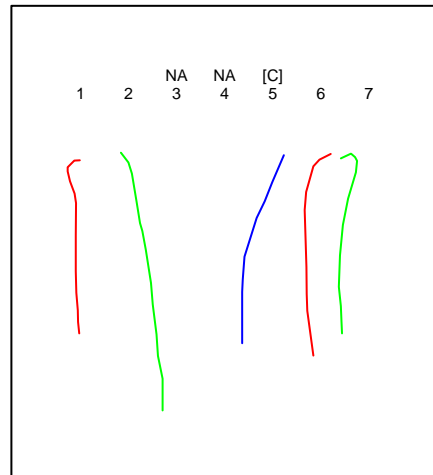

IL12-3-1 REP4 plate A – Experiment REP4  
SiobhanMeasurements/Results\_12\_28\_14.tsv

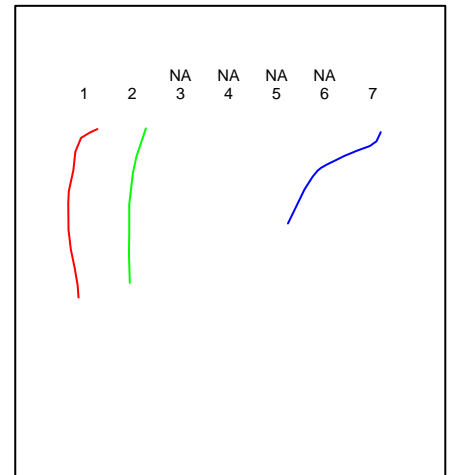

IL12-3-1 REP4 plate B – Experiment REP4  
SiobhanMeasurements/Results\_12\_28\_14.tsv

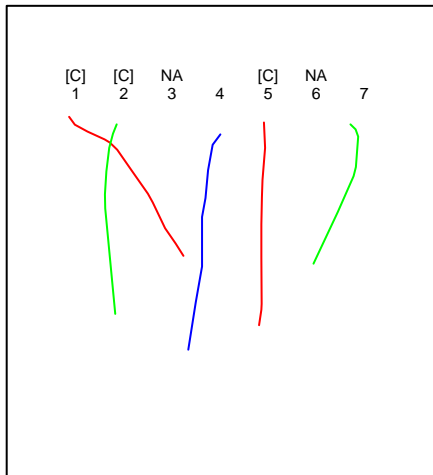

IL12-3-1 REP5 plate A – Experiment REP5  
SiobhanMeasurements/Results\_12\_28\_14.tsv

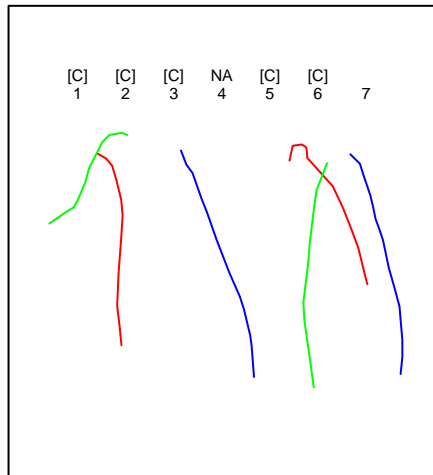

IL12-3-1 REP5 plate B – Experiment REP5  
SiobhanMeasurements/Results\_12\_28\_14.tsv

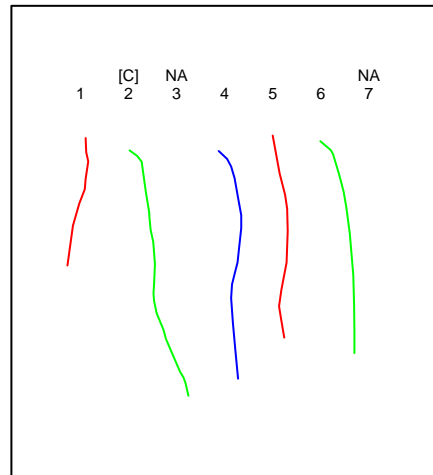

IL12-4 REP2 plate A – Experiment REP2  
SiobhanMeasurements/Results\_1\_1\_15.tsv

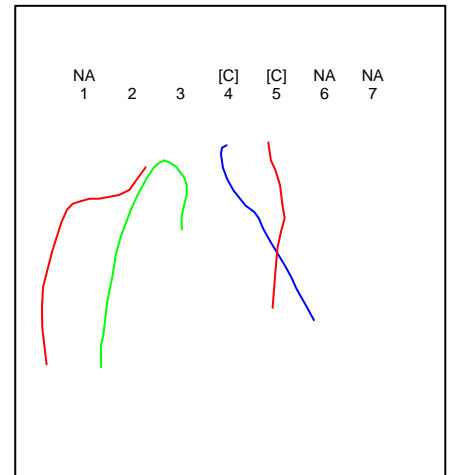

IL12-4 REP2 plate B – Experiment REP2  
SiobhanMeasurements/Results\_1\_1\_15.tsv

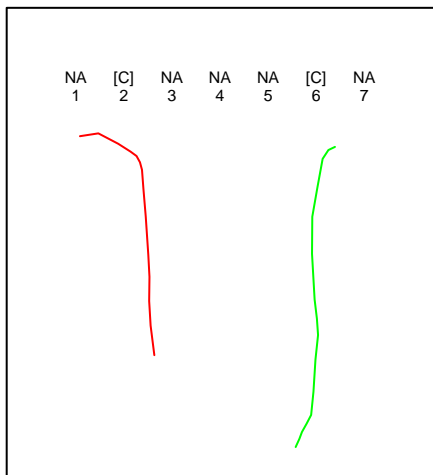

IL12-4 REP3 plate A – Experiment REP3  
SiobhanMeasurements/Results\_1\_1\_15.tsv

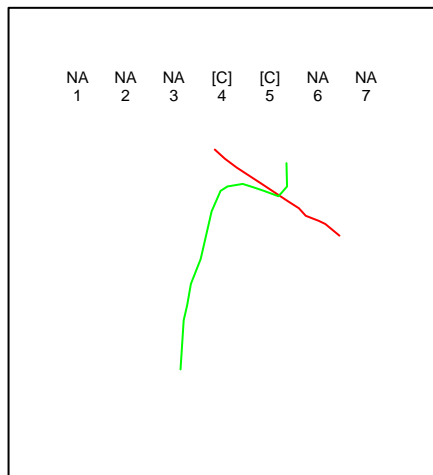

IL12-4 REP3 plate B – Experiment REP3  
SiobhanMeasurements/Results\_1\_1\_15.tsv

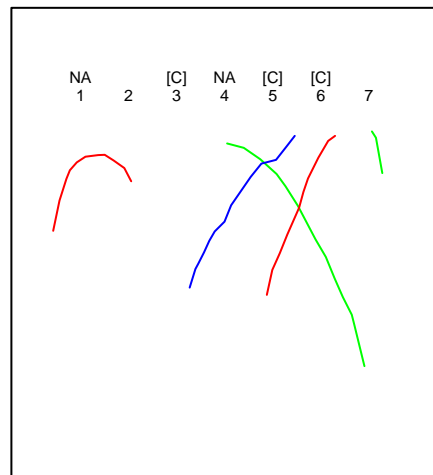

IL12-4 REP4 plate A – Experiment REP4  
SiobhanMeasurements/Results\_1\_1\_15.tsv

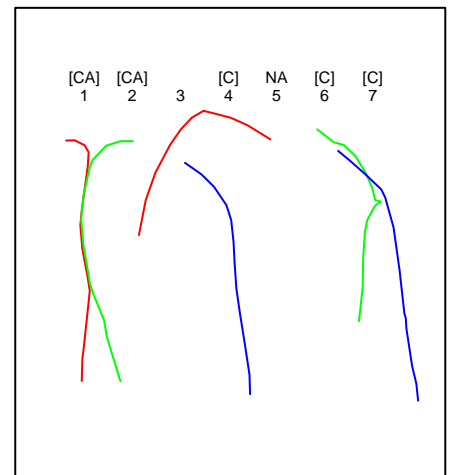

IL12-4 REP4 plate B – Experiment REP4  
SiobhanMeasurements/Results\_1\_1\_15.tsv

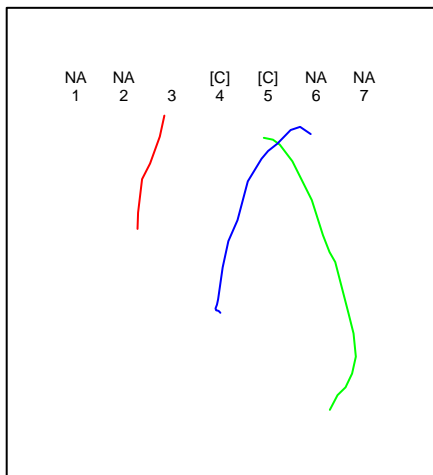

IL12-4 REP5 plate A – Experiment REP5  
SiobhanMeasurements/Results\_1\_1\_15.tsv

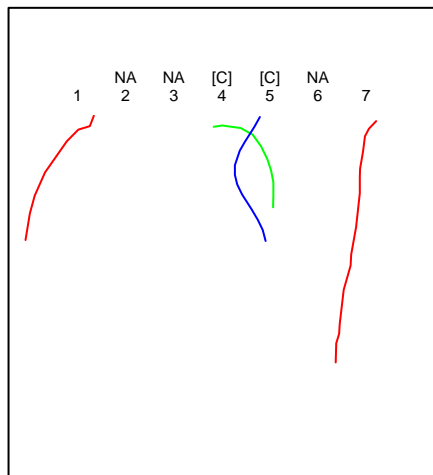

IL12-4 REP5 plate B – Experiment REP5  
SiobhanMeasurements/Results\_1\_1\_15.tsv

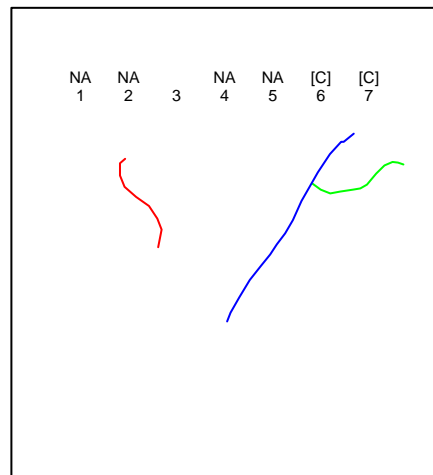

IL12-4 UNKN plate A – Experiment REPX1  
SiobhanMeasurements/Results\_1\_1\_15.tsv

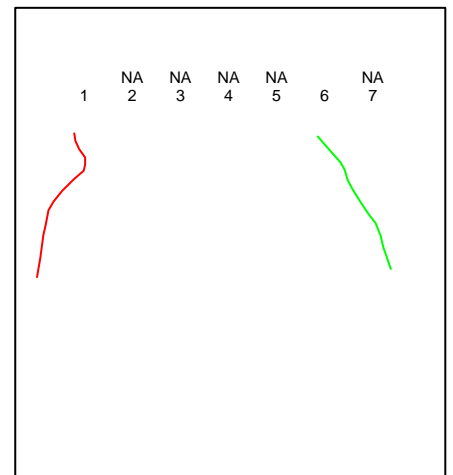

IL12-4 UNKN plate B – Experiment REPX1  
SiobhanMeasurements/Results\_1\_1\_15.tsv

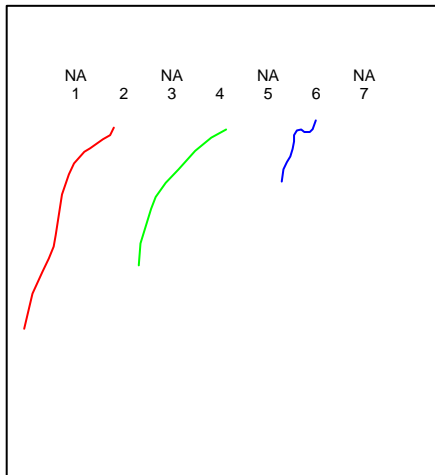

IL12-4 UNKN plate C – Experiment REPX1  
SiobhanMeasurements/Results\_1\_1\_15.tsv

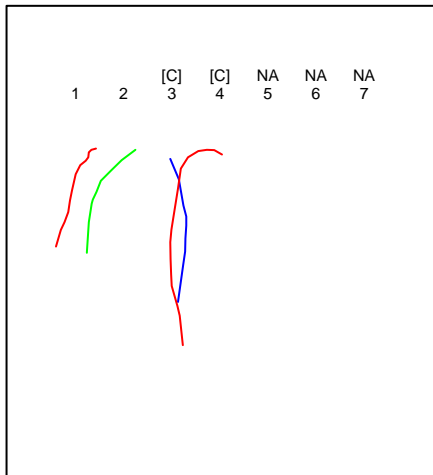

IL12-4 UNKN plate D – Experiment REPX1  
SiobhanMeasurements/Results\_1\_1\_15.tsv

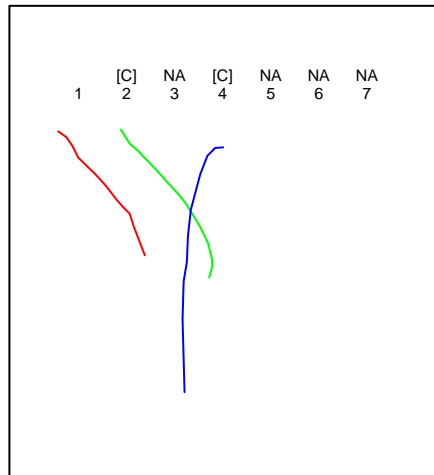

IL12-4 UNKN plate A – Experiment REPX3  
SiobhanMeasurements/Results\_1\_1\_15.tsv

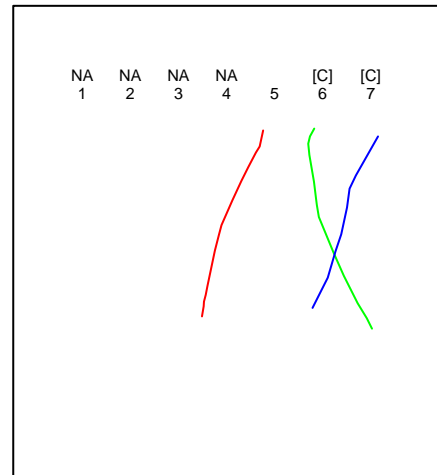

IL12-4 UNKN plate B – Experiment REPX3  
SiobhanMeasurements/Results\_1\_1\_15.tsv

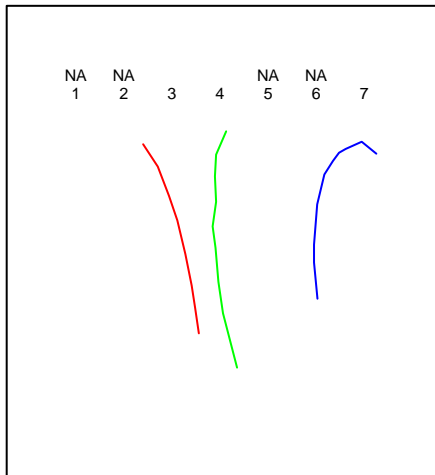

IL12-4 UNKN plate C – Experiment REPX3  
SiobhanMeasurements/Results\_1\_1\_15.tsv

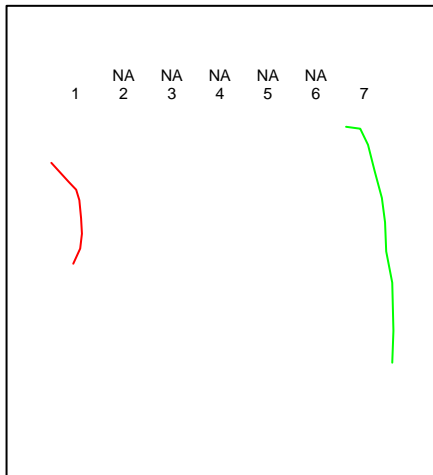

IL12-4 UNKN plate A – Experiment REPX4  
SiobhanMeasurements/Results\_1\_1\_15.tsv

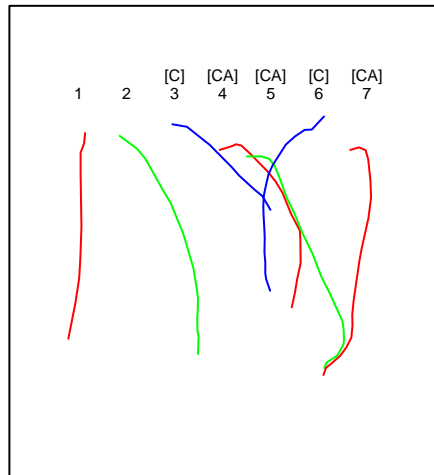

IL12-4 UNKN plate B – Experiment REPX4  
SiobhanMeasurements/Results\_1\_1\_15.tsv

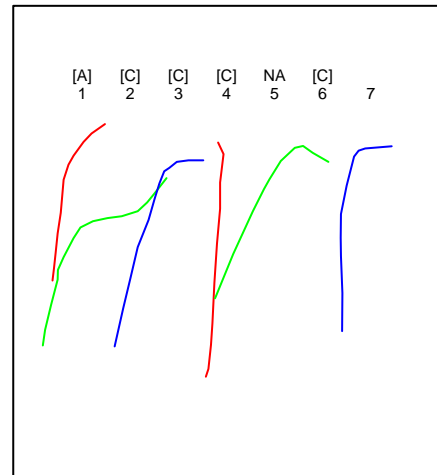

IL12-4 UNKN plate C – Experiment REPX4  
SiobhanMeasurements/Results\_1\_1\_15.tsv

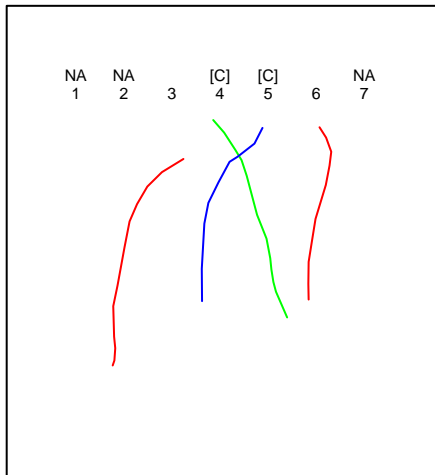

IL12-4 UNKN plate A – Experiment REPX5  
SiobhanMeasurements/Results\_1\_1\_15.tsv

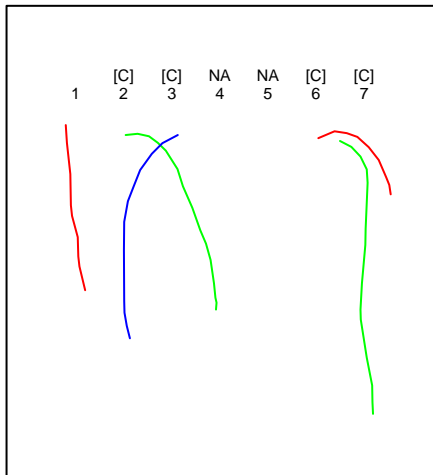

IL12-4 UNKN plate B – Experiment REPX5  
SiobhanMeasurements/Results\_1\_1\_15.tsv

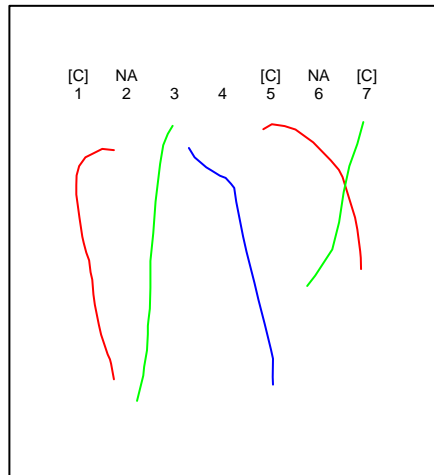

IL12-4 UNKN plate C – Experiment REPX5  
SiobhanMeasurements/Results\_1\_1\_15.tsv

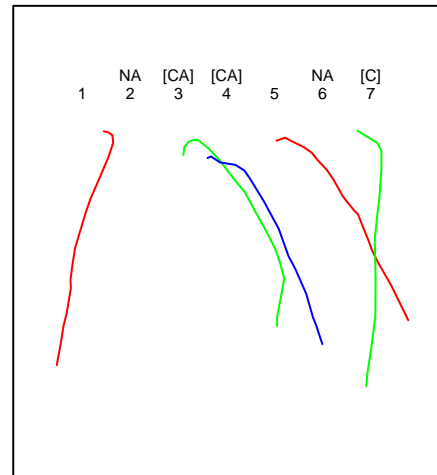

IL12-4-1 REP2 plate A – Experiment REP2  
SiobhanMeasurements/Results\_1\_1\_15.tsv

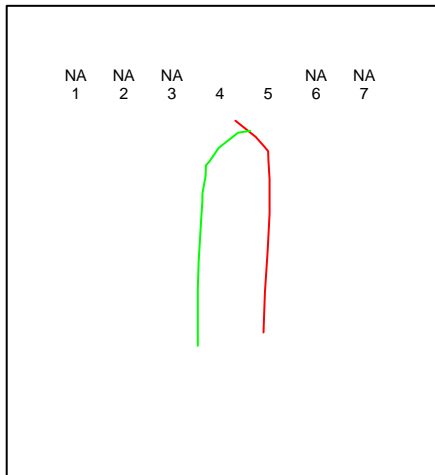

IL12-4-1 REP2 plate B – Experiment REP2  
SiobhanMeasurements/Results\_1\_1\_15.tsv

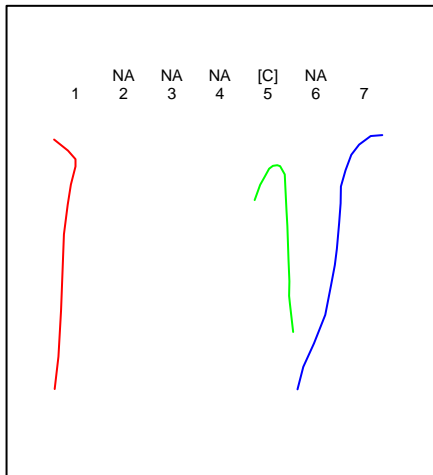

IL12-4-1 REP3 plate A – Experiment REP3  
SiobhanMeasurements/Results\_1\_1\_15.tsv

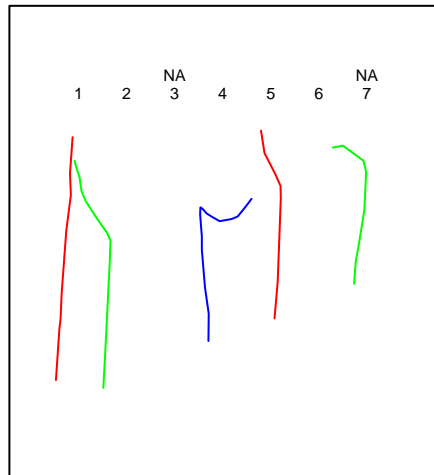

IL12-4-1 REP3 plate B – Experiment REP3  
SiobhanMeasurements/Results\_1\_1\_15.tsv

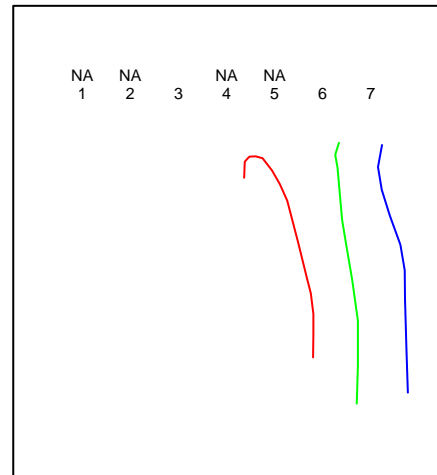

IL12-4-1 REP4 plate A – Experiment REP4  
SiobhanMeasurements/Results\_1\_1\_15.tsv

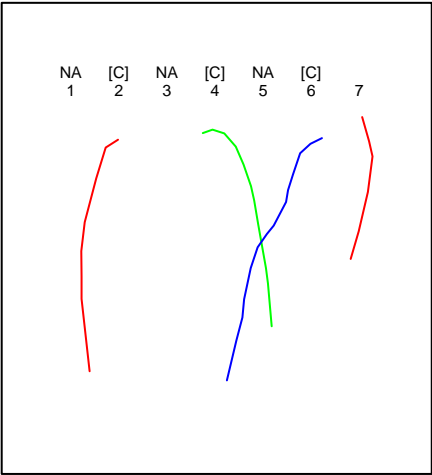

IL12-4-1 REP4 plate B – Experiment REP4  
SiobhanMeasurements/Results\_1\_1\_15.tsv

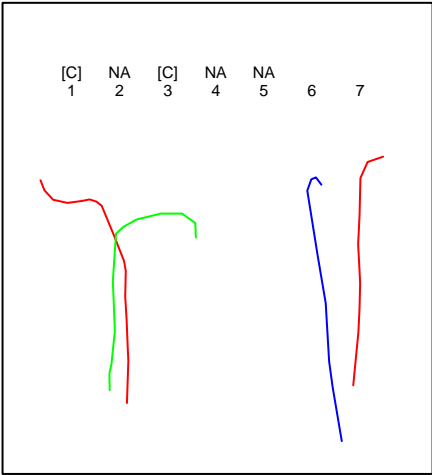

IL12-4-1 REP5 plate A – Experiment REP5  
SiobhanMeasurements/Results\_1\_1\_15.tsv

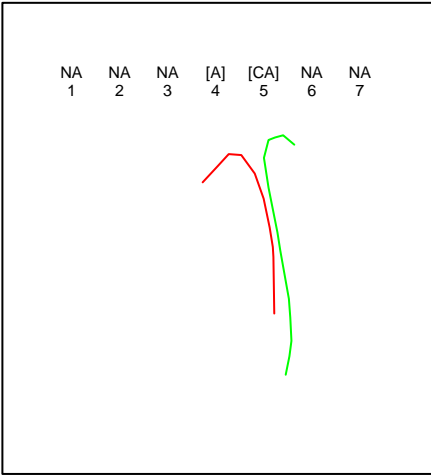

IL12-4-1 REP5 plate B – Experiment REP5  
SiobhanMeasurements/Results\_1\_1\_15.tsv

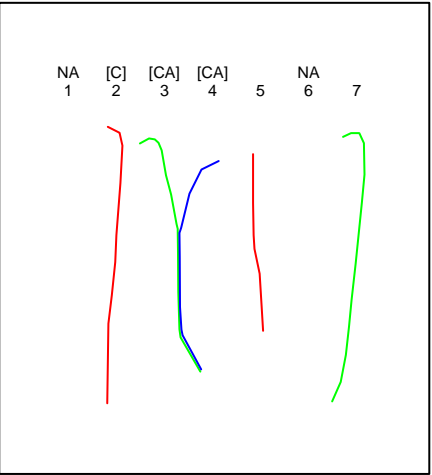

Supplement: Supplementary file 35 [file 2]
