# Supplementary material
Source: publisher figshare collection journal article supplement (https://gsajournals.figshare.com/articles/dataset/_/7237562)
Supplement: Supplementary file 1 [file 2]

## Sheet: sheet1
filename
