# Supplementary material
Source: publisher figshare collection journal article supplement (https://gsajournals.figshare.com/articles/dataset/_/7237562)
Supplement: Supplementary file 3 [file 2]

## Supplemental Material

### Supplemental Figures

**Figure S1. Changes in Root angle in M82 and Penn do not represent skewing.** Percentage of roots (y-axis) showing skew to the left or to the right in M82 (n=68) and PENN (n=78). No preference to skew to the left or the right is observed using a chi-square test and thus the null hypothesis is accepted.

**Figure S2. Mean root growth rate per time point in the two hours following rotation of M82 (n=89) and PENN (n=18).**

**Figure S3. Overlap between average absolute angle QTL and root tip angle QTL.** Venn diagram showing overlap between QTL identified for average absolute angle in this study compared to Ron et al. 2013.

**Figure S4. Pearson correlation of AvgAbsAng with swing rate at each of the 34 time points.**

**Figure S5. Precomputed phylogenetic tree of AT5G50400 (PAP27) and homologs in different species.** Homology to the protein sequence of AT5G50400 (Vilella et al. 2009; EBI 2015) is used. The taxon designation of the three highest nodes is shown. Subnodes that do not contain any genes from *A. thaliana* or *S. lycopersicum* are collapsed. PAP27 and its paralogs in *A. thaliana* and homologs in *S. lycopersicum* are called out in larger type. Alignments are shown to the right.

**Figure S6. Maximum likelihood phylogenetic tree of AT5G50400 (PAP27) and homologs in *A. thaliana*, *S. lycopersicum*, and *S. pennellii*.** Tree is computed with 200 bootstraps using MEGA (Tamura et al. 2011) from protein sequences. Suffixes "-out1" and "-out2" mark genes used as outgroups. Homologs were identified using the gene tree from **Fig S3** and with BLAST+ (Camacho et al. 2009). Multiple alignment used Muscle (Edgar 2004).

**Figure S7. Root Length of *AtPAP27* overexpression lines does not linearly correlate with expression of *AtPAP27*.** Error bars represent standard error of the mean,  $n_{\text{avgAbsAng}}(\text{Col-0})=275$ ,  $n_{\text{avgAbsAng}}(35\text{S:AtPAP27/lineA})=11$ ,  $n_{\text{avgAbsAng}}(35\text{S:AtPAP27/lineB})=20$ ,  $n_{\text{avgAbsAng}}(35\text{S:AtPAP27/lineD})=83$ ,  $n_{\text{avgAbsAng}}(35\text{S:AtPAP27/lineF})=100$ ;  $n_{\text{EXPRESSION}}(\text{Col-0})=$ ,  $n_{\text{EXPRESSION}}(35\text{S:AtPAP27/lineA})=11$ ,  $n_{\text{EXPRESSION}}(35\text{S:AtPAP27/lineB})=20$ ,  $n_{\text{EXPRESSION}}(35\text{S:AtPAP27/lineD})=22$ ,  $n_{\text{EXPRESSION}}(35\text{S:AtPAP27/lineF})=7$ .

**Figure S8. AvgAbsAng measurements capture the variation in the top and bottom 5 accessions for "Direction Index" (A) and "Root Angle".** In each panel, the accessions with the highest "Direction Index" or "Root Angle" are shown on the left, while the accessions with the lowest "Direction Index" or "Root Angle" are shown on the right. n(Wa-1)=23, n(Cvi-0)=24, n(KI-5)=24, n(Jm-0)=24, n(Eds-1)=18, n(Cala-8)=22, n(Yo-0)=21, n(Hh-0)=22, n(Rak-2)=20, n(Col-0)=22, n(Coc-1)=23.

**Figure S9. SNP patterns of contrasting accessions for direction index. (A)** Gene models in the *CDC73* region. **(B)** GWAS LOD score for the "median direction index day4" trait. **(C)** Exemplary accessions for low and high values of the direction index trait that was mapped using GWAS. A potentially relevant SNP that was not included in the original 250K SNP chip is indicated by the red box. Following criteria for the selection of the depicted accessions were used: 1) Genome sequence for accession is available on the <http://signal.salk.edu/atg1001/3.0/gebrowser.php> 2) For accessions with the lowest direction indexes: those having reference allele A/T (associated with low direction index) at the GWAS identified marker position (Chromosome 3, position 8008000) were selected. For accessions with highest direction indexes: those having marker SNP C/G (associated with high direction index). 3) For accessions with low direction index: examples from three haplotypes (inferred by fastPHASE) are shown with two exemplary accessions for each haplotype. Extreme accessions with the highest direction index belong (except Cvi-0) to the same predicted haplotype.

**Figure S10. Root length of *cdc73* mutant alleles does not vary in a manner similar to root angle.** Error bars represent standard error of the mean, n(Col-0)=144, n(*cdc73-1*)=85, n(*cdc73-2*)=26, n(FRI)=22, n(FRI/*cdc73-1*)=32.

**Supplemental Movie 1:** <http://phytomorph.wisc.edu/results/Brady/M82.mp4>

**Supplemental Movie 2:** <http://phytomorph.wisc.edu/results/Brady/penn.mp4>

### Supplemental Datasets

1. **S1\_Dataset.zip:** zip file of code, input data, and output files for average absolute angle phenotype analysis.
2. **S2\_Dataset.zip:** zip file of code, input data, and output files for rotation phenotype analysis.
3. **S3\_Dataset.zip:** Normalized average expression of all genes in the 76 introgression lines.

4. **S4\_Dataset.xlsx**: Dataset of p-values from GWAS on root direction index on DAG 4 of 257 accessions; Uncorrected genome-wide association p-values for each SNP tested. Minor allele count (MAC) refers to the number of accessions in the study panel carrying minor allele for the respective SNP. Minor allele frequency (MAF) refers to the frequency thereof.

### Supplemental Tables

| trait     | genotype  | N  | mean  | std. error | p-value | q-value |
|-----------|-----------|----|-------|------------|---------|---------|
| avgAbsAng | M82       | 60 | 16.85 | 1.37       | NA      | NA      |
| avgAbsAng | PENN      | 78 | 47.88 | 1.53       | 0.000   | 0.000   |
| avgAbsAng | IL1-1-2   | 13 | 26.92 | 3.22       | 0.010   | 0.037   |
| avgAbsAng | IL1-1-4   | 34 | 22.18 | 2.12       | 0.002   | 0.010   |
| avgAbsAng | IL1-4-18  | 25 | 26.29 | 2.28       | 0.000   | 0.001   |
| avgAbsAng | IL2-2     | 23 | 28.54 | 2.15       | 0.000   | 0.001   |
| avgAbsAng | IL2-3     | 29 | 24.52 | 2.35       | 0.001   | 0.006   |
| avgAbsAng | IL3-1     | 34 | 23.55 | 1.95       | 0.004   | 0.016   |
| avgAbsAng | IL3-2     | 22 | 25.17 | 2.28       | 0.015   | 0.050   |
| avgAbsAng | IL4-1     | 34 | 27.39 | 3.20       | 0.000   | 0.000   |
| avgAbsAng | IL5-3     | 29 | 25.38 | 2.54       | 0.001   | 0.006   |
| avgAbsAng | IL7-1     | 37 | 23.09 | 1.67       | 0.008   | 0.030   |
| avgAbsAng | IL7-4     | 29 | 24.88 | 2.77       | 0.002   | 0.009   |
| avgAbsAng | IL7-4-1   | 34 | 37.76 | 2.90       | 0.000   | 0.000   |
| avgAbsAng | IL7-5     | 28 | 26.81 | 2.31       | 0.000   | 0.000   |
| avgAbsAng | IL7-5-5   | 35 | 27.15 | 2.15       | 0.000   | 0.000   |
| avgAbsAng | IL7-5-P75 | 35 | 30.23 | 2.70       | 0.000   | 0.000   |
| avgAbsAng | IL8-1     | 24 | 23.59 | 4.10       | 0.011   | 0.038   |
| avgAbsAng | IL8-1-5   | 45 | 22.95 | 2.06       | 0.013   | 0.042   |
| avgAbsAng | IL8-2-1   | 29 | 31.22 | 2.85       | 0.000   | 0.000   |
| avgAbsAng | IL8-3-1   | 16 | 30.70 | 6.05       | 0.000   | 0.000   |
| avgAbsAng | IL9-3     | 37 | 23.85 | 1.72       | 0.003   | 0.011   |

|           |          |    |       |      |       |       |
|-----------|----------|----|-------|------|-------|-------|
| avgAbsAng | IL11-4   | 24 | 31.08 | 2.21 | 0.000 | 0.000 |
| avgAbsAng | IL12-1-1 | 10 | 37.24 | 6.69 | 0.000 | 0.000 |
| avgAbsAng | IL12-4   | 71 | 27.63 | 1.88 | 0.000 | 0.000 |

**Table S1.** Number of samples, mean, and standard error for root angle traits in *S. lycopersicum* cv. M82, *S. pennellii*, and all ILs significantly ( $q$ -value  $\leq 0.05$ ) different from M82, with  $p$ -values and their FDR-adjusted (Benjamini and Hochberg)  $q$ -values for the genotype contribution being significant. The comparison used the mixed-effect linear model "trait ~ genotype + collide + (1|germAge) + (1|plateDate)", where "trait" is the avgAbsAng, "genotype" is the plant genotype, "collide" is TRUE if the plant root collided with another plant's root during growth on the plate, "germAge" is the age since germination and is a random-effect variable, and "plateDate" is the date of plating and is also a random-effect.

| genotype | peak swing rate | peak time (timepoint) |
|----------|-----------------|-----------------------|
| M82      | 3.9±0.12        | 29±1.7 (T7)           |
| PENN     | 2.7±0.43        | 69±11 (T18)           |
| All ILs  | 3.6±0.061       | 30±1.1 (T8)           |
| IL1-1-2  | 4.4±0.19        | 21±2.3 (T5)           |
| IL1-1-3  | 4±1.1           | 30±11 (T8)            |
| IL1-3    | 4.7±0.16        | 20±3 (T5)             |
| IL1-4    | 3.7±0.22        | 30±5.3 (T8)           |
| IL1-4-18 | 3±0.22          | 67±8.7 (T17)          |
| IL2-1    | 5±0.57          | 17±0.99 (T4)          |
| IL2-1-1  | 4.5±0.15        | 16±2.6 (T4)           |
| IL2-2    | 4.5±0.27        | 16±2.5 (T4)           |
| IL2-3    | 3.5±0.3         | 22±5.2 (T5)           |
| IL2-4    | 4±0.19          | 26±5.9 (T6)           |
| IL2-6-5  | 3.5±0.15        | 18±5.3 (T4)           |
| IL3-1    | 3.9±0.3         | 14±1.8 (T3)           |

|          |          |              |
|----------|----------|--------------|
| IL3-5    | 3.5±0.23 | 29±3.3 (T7)  |
| IL4-1    | 2.4±0.23 | 34±4.8 (T9)  |
| IL4-1-1  | 2.6±0.21 | 24±5.8 (T6)  |
| IL4-3    | 2.8±0.26 | 21±3.7 (T5)  |
| IL4-3-2  | 3.9±0.25 | 15±1.2 (T4)  |
| IL4-4    | 3.3±0.41 | 42±12 (T11)  |
| IL5-1    | 3.7±0.34 | 36±14 (T9)   |
| IL5-2    | 3.3±0.31 | 20±2.8 (T5)  |
| IL5-3    | 4±0.76   | 18±3.6 (T4)  |
| IL5-5    | 3.1±0.16 | 27±1.4 (T7)  |
| IL6-1    | 4.2±0.49 | 31±5.3 (T8)  |
| IL6-2    | 3.8±0.24 | 24±4.9 (T6)  |
| IL6-4    | 2.8±0.21 | 43±6.8 (T11) |
| IL7-1    | 3.3±0.27 | 35±7.4 (T9)  |
| IL7-3    | 3±0.41   | 43±10 (T11)  |
| IL7-4    | 3.1±0.25 | 45±8.4 (T12) |
| IL7-4-1  | 3.6±0.18 | 49±15 (T13)  |
| IL7-5    | 4.1±0.38 | 36±11 (T9)   |
| IL7-5-1  | 3.5±0.82 | 46±12 (T12)  |
| IL7-5-5  | 3.1±0.12 | 33±3.4 (T8)  |
| IL7-5-P5 | 3.4±0.27 | 34±6.2 (T9)  |
| IL8-1    | 3.8±0.21 | 21±2.1 (T5)  |
| IL8-1-1  | 3.2±0.31 | 20±3.5 (T5)  |
| IL8-1-5  | 3.1±0.26 | 28±3.6 (T7)  |
| IL8-2-1  | 1.1±0.64 | 21±13 (T5)   |
| IL8-3    | 4±0.37   | 20±2.6 (T5)  |
| IL8-3-1  | 12±2.4   | 3.8±2.2 (T1) |
| IL9-1    | 3.1±0.18 | 25±2.4 (T6)  |
| IL9-1-2  | 3.1±0.29 | 37±13 (T9)   |
| IL9-1-3  | NA       | NA (NA)      |
| IL9-2    | 4.6±0.34 | 23±4.8 (T6)  |
| IL9-2-5  | NA       | NA (NA)      |

|          |          |              |
|----------|----------|--------------|
| IL9-2-6  | 3.4±0.29 | 27±4.3 (T7)  |
| IL9-3-1  | 3±0.33   | 44±12 (T11)  |
| IL10-1   | 3.2±0.41 | 22±3.6 (T5)  |
| IL10-1-1 | 3.7±0.23 | 38±15 (T10)  |
| IL10-2   | 5.7±0.28 | 24±6.6 (T6)  |
| IL10-2-2 | 4.2±0.59 | 41±15 (T10)  |
| IL10-3   | 3.5±0.35 | 41±6.4 (T10) |
| IL11-1   | 3.5±0.16 | 29±3.9 (T7)  |
| IL11-2   | 3.4±0.34 | 24±7.1 (T6)  |
| IL11-4   | 3.5±0.36 | 49±12 (T13)  |
| IL11-4-1 | 4±0.37   | 21±4.1 (T5)  |
| IL12-1   | 3.6±0.21 | 25±3 (T6)    |
| IL12-1-1 | 3.3±0.24 | 38±12 (T10)  |
| IL12-2   | 2.4±0.25 | 41±12 (T10)  |
| IL12-3   | 4.3±0.65 | 27±6.1 (T7)  |
| IL12-3-1 | 4.6±0.34 | 15±3.4 (T4)  |
| IL12-4   | 3.2±0.26 | 29±5.8 (T7)  |
| IL12-4-1 | 3.5±0.38 | 33±3.4 (T8)  |

**Table S2.** Mean ± standard error of peak swing rates (degrees/3.75 mins) and mean time of peak swing rates ± standard error (mins) with timepoint shown for reference, for M82, *S. pennellii*, and ILs.

| timepoint | genotype | N  | mean | stderr | p-value  | q-value  |
|-----------|----------|----|------|--------|----------|----------|
| T0        | M82      | 89 | 0.29 | 0.17   | NA       | NA       |
| T0        | PENN     | 18 | 0.35 | 0.41   | 0.87     | 0.97     |
| T0        | IL5-3    | 5  | -2.3 | 0.73   | 0.00041  | 0.024    |
| T1        | M82      | 89 | 0.63 | 0.11   | NA       | NA       |
| T1        | PENN     | 18 | 0.64 | 0.27   | 0.96     | 0.96     |
| T1        | IL2-1-1  | 10 | 2    | 0.35   | 9.30E-05 | 0.0027   |
| T1        | IL7-4    | 8  | -1.3 | 0.39   | 1.40E-06 | 8.20E-05 |
| T2        | M82      | 89 | 1.3  | 0.12   | NA       | NA       |
| T2        | PENN     | 18 | 1.1  | 0.3    | 0.45     | 0.71     |

|    |          |    |       |      |          |          |
|----|----------|----|-------|------|----------|----------|
| T2 | IL1-4-18 | 19 | 0.28  | 0.3  | 0.00038  | 0.0055   |
| T2 | IL2-1-1  | 10 | 3.4   | 0.39 | 2.60E-07 | 1.50E-05 |
| T2 | IL7-4    | 8  | -0.44 | 0.43 | 4.60E-05 | 0.0013   |
| T2 | IL12-3-1 | 8  | 3.1   | 0.43 | 7.20E-05 | 0.0014   |
| T3 | M82      | 89 | 1.9   | 0.13 | NA       | NA       |
| T3 | PENN     | 18 | 1.2   | 0.32 | 0.028    | 0.13     |
| T3 | IL1-3    | 5  | 4.1   | 0.57 | 6.20E-05 | 0.00081  |
| T3 | IL1-4-18 | 19 | 0.56  | 0.31 | 3.70E-05 | 0.00072  |
| T3 | IL2-1    | 8  | 3.8   | 0.46 | 1.70E-05 | 0.00048  |
| T3 | IL2-1-1  | 10 | 3.8   | 0.41 | 2.00E-06 | 0.00012  |
| T3 | IL2-2    | 5  | 3.7   | 0.57 | 0.0014   | 0.011    |
| T3 | IL2-6-5  | 6  | 3.3   | 0.52 | 0.0063   | 0.041    |
| T3 | IL4-3-2  | 8  | 3.1   | 0.46 | 0.0059   | 0.041    |
| T3 | IL10-2   | 8  | 3.5   | 0.46 | 0.00044  | 0.0042   |
| T3 | IL12-3-1 | 8  | 3.7   | 0.46 | 7.00E-05 | 0.00081  |
| T4 | M82      | 89 | 2.2   | 0.13 | NA       | NA       |
| T4 | PENN     | 18 | 1     | 0.32 | 0.00042  | 0.0037   |
| T4 | IL1-3    | 5  | 4.2   | 0.57 | 0.00044  | 0.0037   |
| T4 | IL1-4-18 | 19 | 0.77  | 0.31 | 1.20E-05 | 0.00018  |
| T4 | IL2-1    | 8  | 4.5   | 0.46 | 2.70E-07 | 1.50E-05 |
| T4 | IL2-1-1  | 10 | 4     | 0.41 | 8.90E-06 | 0.00017  |
| T4 | IL4-3-2  | 8  | 3.4   | 0.46 | 0.0063   | 0.036    |
| T4 | IL9-2    | 13 | 3.3   | 0.37 | 0.0025   | 0.016    |
| T4 | IL10-2   | 8  | 4.2   | 0.46 | 6.80E-06 | 0.00017  |
| T4 | IL10-2-2 | 7  | 3.5   | 0.49 | 0.0068   | 0.036    |
| T4 | IL12-2   | 7  | 0.67  | 0.49 | 0.0025   | 0.016    |
| T4 | IL12-3-1 | 8  | 3.8   | 0.46 | 0.00039  | 0.0037   |
| T5 | M82      | 89 | 2.4   | 0.14 | NA       | NA       |
| T5 | PENN     | 18 | 0.83  | 0.34 | 2.80E-06 | 5.40E-05 |
| T5 | IL1-4-18 | 19 | 0.67  | 0.33 | 1.50E-07 | 8.70E-06 |
| T5 | IL2-1    | 8  | 4.7   | 0.48 | 2.50E-06 | 5.40E-05 |
| T5 | IL10-2   | 8  | 4.3   | 0.48 | 0.00013  | 0.0019   |
| T6 | M82      | 89 | 2.6   | 0.13 | NA       | NA       |
| T6 | PENN     | 18 | 0.44  | 0.32 | 7.10E-12 | 4.10E-10 |
| T6 | IL1-4-18 | 19 | 0.78  | 0.31 | 2.70E-09 | 7.80E-08 |
| T6 | IL4-1-1  | 10 | 1.5   | 0.41 | 0.0058   | 0.048    |
| T6 | IL4-3    | 14 | 1.7   | 0.35 | 0.0057   | 0.048    |

|     |          |    |       |      |          |          |
|-----|----------|----|-------|------|----------|----------|
| T6  | IL6-1    | 23 | 1.4   | 0.29 | 7.60E-06 | 0.00015  |
| T6  | IL7-5-5  | 28 | 1.8   | 0.26 | 0.0016   | 0.024    |
| T6  | IL10-2   | 8  | 4     | 0.45 | 0.0021   | 0.024    |
| T7  | M82      | 89 | 2.9   | 0.12 | NA       | NA       |
| T7  | PENN     | 18 | 0.43  | 0.3  | 5.00E-16 | 2.90E-14 |
| T7  | IL1-4-18 | 19 | 0.86  | 0.29 | 5.80E-12 | 1.70E-10 |
| T7  | IL4-1-1  | 10 | 1.3   | 0.38 | 2.70E-05 | 0.00039  |
| T7  | IL4-3    | 14 | 1.6   | 0.33 | 6.20E-05 | 6.00E-04 |
| T7  | IL6-1    | 23 | 1.2   | 0.27 | 2.40E-10 | 4.70E-09 |
| T7  | IL7-3    | 8  | 1.6   | 0.42 | 0.003    | 0.022    |
| T7  | IL7-5-1  | 7  | 1.6   | 0.45 | 0.0037   | 0.024    |
| T7  | IL7-5-5  | 28 | 2     | 0.25 | 0.00036  | 0.003    |
| T7  | IL10-2   | 8  | 4.1   | 0.42 | 0.0044   | 0.026    |
| T7  | IL12-2   | 7  | 1.1   | 0.45 | 5.80E-05 | 6.00E-04 |
| T8  | M82      | 89 | 2.8   | 0.12 | NA       | NA       |
| T8  | PENN     | 18 | 0.53  | 0.29 | 1.70E-14 | 1.00E-12 |
| T8  | IL1-4-18 | 19 | 1.2   | 0.28 | 8.30E-09 | 1.60E-07 |
| T8  | IL2-1    | 8  | 1.6   | 0.41 | 0.0026   | 0.019    |
| T8  | IL4-1-1  | 10 | 1.3   | 0.37 | 5.40E-05 | 0.00063  |
| T8  | IL4-3    | 14 | 1.3   | 0.32 | 6.50E-06 | 9.40E-05 |
| T8  | IL4-3-2  | 8  | 1.6   | 0.41 | 0.0032   | 0.02     |
| T8  | IL6-1    | 23 | 1.1   | 0.26 | 4.40E-11 | 1.30E-09 |
| T8  | IL6-4    | 5  | 1.3   | 0.52 | 0.0046   | 0.026    |
| T8  | IL7-5-5  | 28 | 2     | 0.24 | 0.0017   | 0.014    |
| T8  | IL12-2   | 7  | 1.2   | 0.44 | 0.00032  | 0.0031   |
| T9  | M82      | 89 | 2.4   | 0.12 | NA       | NA       |
| T9  | PENN     | 18 | 0.34  | 0.3  | 7.60E-12 | 4.40E-10 |
| T9  | IL1-4-18 | 19 | 1.4   | 0.29 | 0.00054  | 0.01     |
| T9  | IL6-1    | 23 | 1.1   | 0.27 | 5.50E-07 | 1.60E-05 |
| T10 | M82      | 89 | 2.1   | 0.12 | NA       | NA       |
| T10 | PENN     | 18 | 0.079 | 0.3  | 1.70E-11 | 1.00E-09 |
| T10 | IL1-4-18 | 19 | 0.96  | 0.29 | 7.90E-05 | 0.0023   |
| T10 | IL6-1    | 23 | 1.1   | 0.27 | 0.00024  | 0.0046   |
| T10 | IL12-2   | 7  | 0.71  | 0.45 | 0.0018   | 0.027    |
| T11 | M82      | 89 | 1.9   | 0.12 | NA       | NA       |
| T11 | PENN     | 18 | 0.24  | 0.28 | 1.20E-08 | 6.80E-07 |
| T11 | IL1-4-18 | 19 | 0.72  | 0.28 | 3.60E-05 | 0.001    |



|     |          |    |          |      |          |          |
|-----|----------|----|----------|------|----------|----------|
| T12 | M82      | 89 | 1.6      | 0.11 | NA       | NA       |
| T12 | PENN     | 18 | 0.32     | 0.27 | 2.50E-06 | 0.00015  |
| T13 | M82      | 89 | 1.4      | 0.1  | NA       | NA       |
| T13 | PENN     | 18 | -0.16    | 0.24 | 9.30E-10 | 5.40E-08 |
| T13 | IL1-4-18 | 19 | 0.5      | 0.24 | 3.00E-04 | 0.0087   |
| T14 | M82      | 89 | 1.3      | 0.11 | NA       | NA       |
| T14 | PENN     | 18 | -0.18    | 0.26 | 4.30E-08 | 2.50E-06 |
| T15 | M82      | 89 | 1.2      | 0.1  | NA       | NA       |
| T15 | PENN     | 18 | 0.34     | 0.24 | 0.001    | 0.029    |
| T15 | IL11-1   | 8  | 2.4      | 0.35 | 0.00024  | 0.014    |
| T16 | M82      | 89 | 0.99     | 0.1  | NA       | NA       |
| T16 | PENN     | 18 | 0.71     | 0.23 | 0.22     | 0.61     |
| T16 | IL4-4    | 11 | -0.00076 | 0.29 | 0.00061  | 0.035    |
| T17 | M82      | 89 | 0.92     | 0.1  | NA       | NA       |
| T17 | PENN     | 18 | 0.43     | 0.24 | 0.042    | 0.41     |
| T18 | M82      | 89 | 0.89     | 0.1  | NA       | NA       |
| T18 | PENN     | 18 | 0.37     | 0.23 | 0.027    | 0.26     |
| T18 | IL11-4   | 5  | 2.7      | 0.42 | 1.40E-05 | 8.00E-04 |
| T19 | M82      | 89 | 0.85     | 0.1  | NA       | NA       |
| T19 | PENN     | 18 | 0.47     | 0.24 | 0.11     | 0.44     |
| T19 | IL11-4   | 5  | 2.3      | 0.42 | 8.00E-04 | 0.046    |
| T20 | M82      | 89 | 0.76     | 0.1  | NA       | NA       |
| T20 | PENN     | 18 | 0.29     | 0.23 | 0.047    | 0.28     |
| T21 | M82      | 89 | 0.44     | 0.09 | NA       | NA       |
| T21 | PENN     | 18 | 0.26     | 0.22 | 0.43     | 0.81     |
| T21 | IL1-4    | 9  | -0.62    | 0.3  | 0.00049  | 0.0094   |
| T21 | IL1-4-18 | 19 | 1.3      | 0.22 | 0.00018  | 0.0052   |
| T21 | IL7-5-5  | 28 | 0.97     | 0.19 | 0.0044   | 0.043    |
| T21 | IL10-3   | 7  | 1.5      | 0.34 | 0.0011   | 0.013    |
| T21 | IL11-4   | 5  | 2        | 0.4  | 6.50E-05 | 0.0037   |
| T21 | IL12-3   | 11 | -0.47    | 0.28 | 0.0011   | 0.013    |
| T22 | M82      | 89 | 0.35     | 0.1  | NA       | NA       |
| T22 | PENN     | 18 | 0.22     | 0.23 | 0.58     | 0.85     |
| T22 | IL1-4    | 9  | -0.77    | 0.31 | 0.00038  | 0.022    |
| T22 | IL7-4-1  | 6  | 1.6      | 0.38 | 0.0015   | 0.044    |
| T23 | M82      | 89 | 0.22     | 0.1  | NA       | NA       |
| T23 | PENN     | 18 | 0.48     | 0.23 | 0.27     | 0.68     |

|     |          |    |         |      |          |         |
|-----|----------|----|---------|------|----------|---------|
| T24 | M82      | 89 | 0.12    | 0.09 | NA       | NA      |
| T24 | PENN     | 18 | 0.63    | 0.23 | 0.029    | 0.4     |
| T24 | IL1-4-18 | 19 | 0.89    | 0.23 | 0.00069  | 0.04    |
| T25 | M82      | 89 | 0.11    | 0.09 | NA       | NA      |
| T25 | PENN     | 18 | 0.4     | 0.21 | 0.18     | 0.58    |
| T25 | IL1-4-18 | 19 | 0.75    | 0.21 | 0.0023   | 0.034   |
| T25 | IL6-1    | 23 | 0.72    | 0.19 | 0.0019   | 0.034   |
| T25 | IL7-4-1  | 6  | 1.3     | 0.35 | 0.00082  | 0.034   |
| T25 | IL11-4   | 5  | 1.3     | 0.38 | 0.0017   | 0.034   |
| T26 | M82      | 89 | -0.0016 | 0.08 | NA       | NA      |
| T26 | PENN     | 18 | 0.42    | 0.2  | 0.033    | 0.19    |
| T26 | IL1-4    | 9  | 0.88    | 0.27 | 0.001    | 0.03    |
| T26 | IL1-4-18 | 19 | 0.93    | 0.19 | 1.90E-06 | 0.00011 |
| T27 | M82      | 89 | 0.082   | 0.08 | NA       | NA      |
| T27 | PENN     | 18 | 0.42    | 0.2  | 0.091    | 0.44    |
| T27 | IL1-4    | 9  | 0.89    | 0.27 | 0.0029   | 0.042   |
| T27 | IL1-4-18 | 19 | 0.95    | 0.2  | 1.10E-05 | 0.00066 |
| T27 | IL10-2-2 | 7  | 1.1     | 0.31 | 0.00056  | 0.016   |
| T27 | IL11-4-1 | 8  | -0.83   | 0.29 | 0.0015   | 0.03    |
| T28 | M82      | 89 | 0.12    | 0.08 | NA       | NA      |
| T28 | PENN     | 18 | 0.018   | 0.2  | 0.61     | 0.91    |
| T29 | M82      | 89 | 0.092   | 0.08 | NA       | NA      |
| T29 | PENN     | 18 | -0.14   | 0.2  | 0.24     | 0.71    |
| T30 | M82      | 89 | 0.19    | 0.09 | NA       | NA      |
| T30 | PENN     | 18 | 0.42    | 0.21 | 0.27     | 0.9     |
| T30 | IL7-5    | 9  | 1.2     | 0.28 | 0.00063  | 0.037   |
| T31 | M82      | 89 | 0.18    | 0.09 | NA       | NA      |
| T31 | PENN     | 18 | 0.36    | 0.21 | 0.38     | 0.78    |
| T32 | M82      | 89 | 0.076   | 0.08 | NA       | NA      |
| T32 | PENN     | 18 | 0.097   | 0.21 | 0.92     | 0.99    |
| T33 | M82      | 89 | 0.057   | 0.13 | NA       | NA      |
| T33 | PENN     | 18 | 0.33    | 0.32 | 0.41     | 0.85    |

**Table S3.** Number of samples, mean, and standard error for swing rate at all 34 timepoints in *S. lycopersicum* cv. M82, *S. pennellii*, and all ILs significantly ( $q$ -value  $\leq 0.05$ ) different from M82 for swing rate, with  $p$ -values and their FDR-adjusted (Benjamini and

Hochberg) q-values for the genotype contribution being significant. The comparison used the simple fixed-effect linear model "swing rate ~ genotype".

| <b>Name</b> | <b>ACC_ID</b> | <b>median_direction_index_DAG4</b> |
|-------------|---------------|------------------------------------|
| Hh-0        | 7169          | 0.1795                             |
| Coc-1       | 5729          | 0.183                              |
| Yo-0        | 6983          | 0.184                              |
| Rak-2       | 8365          | 0.1875                             |
| Cala-8      | 9152          | 0.189                              |
| Br-0        | 6904          | 0.194                              |
| Col-0       | 6909          | 0.194                              |
| Rev-1       | 8369          | 0.194                              |
| Bch-1       | 7028          | 0.196                              |
| Algutsrum   | 8230          | 0.1975                             |
| Pu2-23      | 6951          | 0.1995                             |
| Ost-0       | 8351          | 0.203                              |
| Benk-1      | 7008          | 0.2075                             |
| Mdn-1       | 1829          | 0.208                              |
| Chat-1      | 7071          | 0.211                              |
| Hau-0       | 7164          | 0.212                              |
| Do-0        | 7102          | 0.2125                             |
| Drall-1     | 8284          | 0.2135                             |
| Eden-2      | 6913          | 0.214                              |
| CrI-1       | 5731          | 0.2145                             |
| Bla-1       | 7015          | 0.22                               |
| Ren-11      | 6960          | 0.2235                             |
| Si-0        | 7337          | 0.224                              |
| Sq-1        | 6966          | 0.224                              |
| Hov4-1      | 8306          | 0.225                              |
| Ema-1       | 5736          | 0.225                              |
| Nw-0        | 8348          | 0.2255                             |

|           |      |        |
|-----------|------|--------|
| Pent-1    | 2187 | 0.226  |
| Bsch-0    | 7031 | 0.226  |
| Bå5-1     | 8259 | 0.226  |
| Ge-0      | 8297 | 0.227  |
| Ct-1      | 6910 | 0.2275 |
| Bå4-1     | 8258 | 0.2275 |
| Ep-0      | 7123 | 0.228  |
| Bor-4     | 6903 | 0.231  |
| Ms-0      | 6938 | 0.231  |
| Duk       | 6008 | 0.232  |
| Es-0      | 7126 | 0.2335 |
| Tottarp-2 | 6243 | 0.234  |
| PHW-2     | 8243 | 0.235  |
| Mir-0     | 8337 | 0.2355 |
| Mt-0      | 6939 | 0.236  |
| FOR-5     | 936  | 0.2365 |
| Ste-3     | 2290 | 0.2375 |
| Baa-1     | 7002 | 0.239  |
| Boot-1    | 7026 | 0.241  |
| Da-0      | 7094 | 0.2415 |
| CUR-8     | 86   | 0.242  |
| Rmx-A02   | 7524 | 0.2425 |
| EM-183    | 461  | 0.243  |
| Arby-1    | 6998 | 0.243  |
| Bay-0     | 6899 | 0.2435 |
| Gd-1      | 8296 | 0.244  |
| Vår2-1    | 7516 | 0.2505 |
| Pi-2      | 7299 | 0.251  |

|        |      |        |
|--------|------|--------|
| Ra-0   | 6958 | 0.253  |
| C24    | 6906 | 0.253  |
| Kin-0  | 6926 | 0.253  |
| Köln   | 8239 | 0.2545 |
| Ca-0   | 7062 | 0.255  |
| Fäb-4  | 6918 | 0.256  |
| Kno-10 | 6927 | 0.256  |
| Ren-1  | 6959 | 0.2575 |
| Ri-0   | 7317 | 0.258  |
| Van-0  | 6977 | 0.2585 |
| Uod-7  | 6976 | 0.259  |
| PAR-8  | 262  | 0.259  |
| Or-0   | 7282 | 0.2605 |
| Bor-1  | 5837 | 0.261  |
| Stw-0  | 8388 | 0.2635 |
| Wc-1   | 7404 | 0.2645 |
| Ma-2   | 7246 | 0.266  |
| Ove-0  | 7287 | 0.266  |
| Bs-1   | 8270 | 0.266  |
| MIB-86 | 224  | 0.267  |
| St-0   | 8387 | 0.267  |
| Ör-1   | 6074 | 0.2675 |
| Lo-2   | 7242 | 0.27   |
| Paw-26 | 2171 | 0.27   |
| Nw-4   | 7262 | 0.2705 |
| Ann-1  | 6994 | 0.2705 |
| Map-42 | 2057 | 0.271  |
| Kyl-1  | 5751 | 0.271  |

|            |      |        |
|------------|------|--------|
| Ws-2       | 6981 | 0.272  |
| Mnz-0      | 7244 | 0.273  |
| Bå1-2      | 8256 | 0.273  |
| Aa-0       | 7000 | 0.274  |
| Lp2-2      | 7520 | 0.2745 |
| Je-0       | 7181 | 0.2745 |
| Kulturen-1 | 8240 | 0.275  |
| MNF-Pot-80 | 1874 | 0.275  |
| Ws-0       | 6980 | 0.275  |
| La-1       | 7210 | 0.276  |
| Old-1      | 7280 | 0.276  |
| Pna-10     | 7526 | 0.276  |
| RRS-10     | 7515 | 0.277  |
| Drall-1    | 8285 | 0.278  |
| Fei-0      | 8215 | 0.279  |
| Oy-0       | 6946 | 0.2795 |
| Pr-0       | 7310 | 0.28   |
| Ba-1       | 7014 | 0.281  |
| UII2-3     | 6973 | 0.283  |
| Blh-1      | 8265 | 0.284  |
| Nyl-2      | 6064 | 0.284  |
| HR-10      | 6923 | 0.285  |
| Bs-2       | 7004 | 0.285  |
| HR-5       | 6924 | 0.2855 |
| Hs-0       | 8310 | 0.2885 |
| Sorbo      | 6963 | 0.289  |
| Co         | 7081 | 0.29   |
| Spr1-6     | 6965 | 0.29   |

|            |      |        |
|------------|------|--------|
| WAR        | 7477 | 0.29   |
| CIBC-17    | 6907 | 0.29   |
| Bu-0       | 8271 | 0.2905 |
| Seattle-0  | 8245 | 0.291  |
| Per-1      | 8354 | 0.293  |
| En-1       | 8290 | 0.294  |
| Gel-1      | 7143 | 0.294  |
| Uod-1      | 6975 | 0.295  |
| Na-1       | 8343 | 0.295  |
| Lu-1       | 8334 | 0.295  |
| Ullapool-3 | 9308 | 0.2955 |
| VOU-5      | 394  | 0.296  |
| Hil-1      | 5745 | 0.296  |
| Ei-2       | 6915 | 0.296  |
| HSm        | 8236 | 0.2965 |
| Tha-1      | 7353 | 0.297  |
| TOU-J-3    | 383  | 0.298  |
| Ob-0       | 7276 | 0.298  |
| Com-1      | 7092 | 0.298  |
| Hi-0       | 8304 | 0.299  |
| Po-1       | 7309 | 0.3    |
| Pla-0      | 7300 | 0.3    |
| Mrk-0      | 6937 | 0.3015 |
| Zu-1       | 7418 | 0.304  |
| Krot-2     | 7205 | 0.305  |
| Pna-17     | 7523 | 0.3055 |
| Brö1-6     | 8231 | 0.306  |
| Wt-5       | 6982 | 0.307  |



|             |      |        |
|-------------|------|--------|
| Kondara     | 6929 | 0.307  |
| Gu-0        | 6922 | 0.307  |
| Ha-0        | 7163 | 0.307  |
| Lip-0       | 8325 | 0.3075 |
| Tscha-1     | 7372 | 0.3075 |
| Edinburgh-5 | 9302 | 0.308  |
| NFA-10      | 6943 | 0.308  |
| Pf-0        | 7297 | 0.308  |
| Rhen-1      | 7316 | 0.309  |
| Rmx-A180    | 7525 | 0.309  |
| LAC-5       | 96   | 0.3095 |
| Pa-2        | 7291 | 0.31   |
| Hey-1       | 7166 | 0.31   |
| Wei-0       | 6979 | 0.312  |
| Li-7        | 7231 | 0.312  |
| Dem-4       | 8233 | 0.3125 |
| Nd-1        | 6942 | 0.3135 |
| Jm-1        | 7178 | 0.314  |
| Sq-8        | 6967 | 0.316  |
| Pn-0        | 7307 | 0.317  |
| Gy-0        | 8214 | 0.318  |
| Nok-3       | 6945 | 0.3185 |
| Liarum      | 8241 | 0.319  |
| Zdr-6       | 6985 | 0.3195 |
| NFA-8       | 6944 | 0.32   |
| Ting-1      | 7354 | 0.32   |
| Sha         | 6962 | 0.3205 |
| Ag-0        | 6897 | 0.321  |

|                    |        |        |
|--------------------|--------|--------|
| San-2              | 8247   | 0.321  |
| Can-0              | 8274   | 0.3215 |
| Cit-0              | 7075   | 0.322  |
| Lp2-6              | 7521   | 0.322  |
| Tiv-1              | 7355   | 0.3225 |
| RAN                | 266    | 0.323  |
| Ty-0               | 7351   | 0.325  |
| Ts-1               | 6970   | 0.3255 |
| HI-3               | 7172   | 0.3255 |
| Kz-9               | 6931   | 0.3255 |
| RRS-7              | 7514   | 0.326  |
| Lz-0               | 6936   | 0.326  |
| Frd-1              | 5742   | 0.3265 |
| Pu2-7              | 6956   | 0.33   |
| Mz-0               | 6940   | 0.331  |
| MIB-60             | 204    | 0.3315 |
| Lag1-6             | 9104   | 0.333  |
| Kr-0               | 7201   | 0.333  |
| Wil-1-Dean-<br>Lab | 100000 | 0.334  |
| Mh-0               | 7255   | 0.335  |
| Sh-0               | 7331   | 0.335  |
| Is-1               | 7176   | 0.3355 |
| Sapporo-0          | 7330   | 0.337  |
| Lan-1              | 5752   | 0.338  |
| Jl-3               | 7424   | 0.338  |
| Utrecht            | 7382   | 0.339  |
| Ts-5               | 6971   | 0.339  |

|               |      |        |
|---------------|------|--------|
| Lc-0          | 8323 | 0.34   |
| Pa-1          | 8353 | 0.3415 |
| Se-0          | 6961 | 0.342  |
| Li-3          | 7224 | 0.3425 |
| Kelsterbach-4 | 8420 | 0.3425 |
| Kno-18        | 6928 | 0.343  |
| Gie-0         | 7147 | 0.343  |
| Sanna-2       | 8376 | 0.344  |
| Tamm-27       | 6969 | 0.345  |
| Mc-0          | 7252 | 0.3455 |
| Rd-0          | 8366 | 0.3465 |
| Rou-0         | 7320 | 0.347  |
| Sg-1          | 7344 | 0.348  |
| Est-1         | 6916 | 0.35   |
| Uk-1          | 7378 | 0.3505 |
| Kz-1          | 6930 | 0.351  |
| Di-1          | 7098 | 0.352  |
| Kni-1         | 6040 | 0.352  |
| Rsch-4        | 8374 | 0.354  |
| Bur-0         | 5719 | 0.355  |
| Got-22        | 6920 | 0.355  |
| Chr-1         | 5723 | 0.356  |
| Ak-1          | 6987 | 0.357  |
| In-0          | 8311 | 0.357  |
| Kil-0         | 7192 | 0.3575 |
| Amel-1        | 6990 | 0.359  |
| Ker-38        | 1782 | 0.359  |
| Ka-0          | 8314 | 0.359  |

|          |      |        |
|----------|------|--------|
| Wilcox-4 | 2320 | 0.3595 |
| Vimmerby | 8249 | 0.3605 |
| Te-0     | 7352 | 0.361  |
| Truk-5   | 9165 | 0.362  |
| Ors-1    | 7283 | 0.369  |
| Zdr-1    | 6984 | 0.37   |
| Np-0     | 7268 | 0.3705 |
| Tamm-2   | 6968 | 0.373  |
| An-1     | 6898 | 0.375  |
| No-0     | 7275 | 0.376  |
| Ven-1    | 7384 | 0.377  |
| Ler-1    | 6932 | 0.378  |
| Lm-2     | 8329 | 0.379  |
| MOG-11   | 236  | 0.3795 |
| Pog-0    | 7306 | 0.382  |
| Pro-0    | 8213 | 0.3825 |
| Tu-0     | 8395 | 0.39   |
| Got-7    | 6921 | 0.3925 |
| Tsu-1    | 6972 | 0.3955 |
| LL-0     | 6933 | 0.3965 |
| Ang-0    | 6992 | 0.4065 |
| Ga-0     | 6919 | 0.416  |
| N13      | 7438 | 0.417  |
| LDV-58   | 149  | 0.418  |
| Is-0     | 8312 | 0.4215 |
| ÖMö2-3   | 7519 | 0.427  |
| Gr-1     | 8300 | 0.427  |
| CIBC-5   | 6730 | 0.43   |

|       |      |       |
|-------|------|-------|
| Sap-0 | 8378 | 0.441 |
| Mr-0  | 7522 | 0.441 |
| Jm-0  | 8313 | 0.443 |
| Eds-1 | 6016 | 0.447 |
| Cvi-0 | 6911 | 0.473 |
| Kl-5  | 7199 | 0.488 |
| Wa-1  | 6978 | 0.518 |

**Table S4. Median “Direction Index” on DAG 4 of 257 *Arabidopsis thaliana* accessions.**

| <b>Name</b>    | <b>ACC_ID</b> | <b>median_gravitropicDir_day_4</b> |
|----------------|---------------|------------------------------------|
| Wa-1           | 6978          | -20.182                            |
| Cvi-0          | 6911          | -16.659                            |
| Jm-0           | 8313          | -16.314                            |
| Ga-0           | 6919          | -15.165                            |
| CIBC-5         | 6730          | -14.334                            |
| Tu-0           | 8395          | -14.088                            |
| Sanna-2        | 8376          | -13.459                            |
| Kl-5           | 7199          | -13.404                            |
| Bur-0          | 5719          | -13.124                            |
| Is-0           | 8312          | -12.8915                           |
| Brö1-6         | 8231          | -12.733                            |
| Np-0           | 7268          | -12.075                            |
| Tsu-1          | 6972          | -11.2945                           |
| Di-1           | 7098          | -11.205                            |
| Wil-1-Dean-Lab | 100000        | -10.895                            |
| Ven-1          | 7384          | -10.4735                           |

|             |      |          |
|-------------|------|----------|
| Ler-1       | 6932 | -10.391  |
| Gie-0       | 7147 | -10.278  |
| Com-1       | 7092 | -10.198  |
| No-0        | 7275 | -10.0125 |
| Wilcox-4    | 2320 | -9.9995  |
| Zdr-1       | 6984 | -9.914   |
| Lan-1       | 5752 | -9.887   |
| San-2       | 8247 | -9.801   |
| LDV-58      | 149  | -9.773   |
| Sap-0       | 8378 | -9.759   |
| Ag-0        | 6897 | -9.7     |
| Kz-1        | 6930 | -9.7     |
| Est-1       | 6916 | -9.478   |
| Dralll-1    | 8285 | -9.4285  |
| Hil-1       | 5745 | -9.1285  |
| Tscha-1     | 7372 | -9.05    |
| Ge-0        | 8297 | -9.027   |
| Fei-0       | 8215 | -8.791   |
| Bs-1        | 8270 | -8.584   |
| Ts-1        | 6970 | -8.5525  |
| Mr-0        | 7522 | -8.533   |
| Edinburgh-5 | 9302 | -8.346   |
| Pro-0       | 8213 | -8.213   |
| RAN         | 266  | -8.1005  |
| Rmx-A02     | 7524 | -7.8985  |
| CUR-8       | 86   | -7.897   |
| Vår2-1      | 7516 | -7.8035  |
| LL-0        | 6933 | -7.762   |

|               |      |         |
|---------------|------|---------|
| Kz-9          | 6931 | -7.7505 |
| Kil-0         | 7192 | -7.708  |
| Ann-1         | 6994 | -7.7035 |
| Ts-5          | 6971 | -7.6885 |
| Zu-1          | 7418 | -7.619  |
| Kelsterbach-4 | 8420 | -7.396  |
| Got-22        | 6920 | -7.2645 |
| Uod-1         | 6975 | -7.036  |
| Cit-0         | 7075 | -6.981  |
| NFA-10        | 6943 | -6.973  |
| Got-7         | 6921 | -6.9545 |
| Fäb-4         | 6918 | -6.913  |
| Ep-0          | 7123 | -6.911  |
| Utrecht       | 7382 | -6.88   |
| Kondara       | 6929 | -6.808  |
| Co            | 7081 | -6.803  |
| ÖMö2-3        | 7519 | -6.7325 |
| Sapporo-0     | 7330 | -6.601  |
| Truk-5        | 9165 | -6.572  |
| An-1          | 6898 | -6.553  |
| Pent-1        | 2187 | -6.551  |
| Kno-18        | 6928 | -6.517  |
| Köln          | 8239 | -6.4205 |
| Bå1-2         | 8256 | -6.382  |
| Ting-1        | 7354 | -6.34   |
| Ws-0          | 6980 | -6.2855 |
| Pa-1          | 8353 | -6.208  |
| Ha-0          | 7163 | -6.187  |

|         |      |         |
|---------|------|---------|
| Zdr-6   | 6985 | -6.151  |
| Tamm-2  | 6968 | -6.092  |
| C24     | 6906 | -6.09   |
| Rhen-1  | 7316 | -6.083  |
| Blh-1   | 8265 | -6.0055 |
| Pa-2    | 7291 | -5.9525 |
| Kr-0    | 7201 | -5.932  |
| Bay-0   | 6899 | -5.92   |
| Mz-0    | 6940 | -5.901  |
| Pog-0   | 7306 | -5.881  |
| Mdn-1   | 1829 | -5.88   |
| Arby-1  | 6998 | -5.812  |
| Ost-0   | 8351 | -5.794  |
| Ra-0    | 6958 | -5.7575 |
| TOU-J-3 | 383  | -5.755  |
| VOU-5   | 394  | -5.662  |
| Oy-0    | 6946 | -5.5825 |
| HI-3    | 7172 | -5.42   |
| Ty-0    | 7351 | -5.416  |
| Sorbo   | 6963 | -5.398  |
| Bsch-0  | 7031 | -5.3415 |
| Rev-1   | 8369 | -5.312  |
| Lm-2    | 8329 | -5.243  |
| Ct-1    | 6910 | -5.146  |
| Wt-5    | 6982 | -5.088  |
| Duk     | 6008 | -5.059  |
| Hi-0    | 8304 | -4.997  |
| Gd-1    | 8296 | -4.948  |



|           |      |         |
|-----------|------|---------|
| Rd-0      | 8366 | -4.8815 |
| Ak-1      | 6987 | -4.764  |
| En-1      | 8290 | -4.681  |
| Jl-3      | 7424 | -4.612  |
| Nyl-2     | 6064 | -4.516  |
| N13       | 7438 | -4.49   |
| Eden-2    | 6913 | -4.4745 |
| Sh-0      | 7331 | -4.47   |
| MOG-11    | 236  | -4.469  |
| Es-0      | 7126 | -4.392  |
| Da-0      | 7094 | -4.2505 |
| Ws-2      | 6981 | -4.227  |
| Algutsrum | 8230 | -4.212  |
| Sq-8      | 6967 | -4.203  |
| Rak-2     | 8365 | -4.1615 |
| EM-183    | 461  | -4.16   |
| CrI-1     | 5731 | -4.1445 |
| Hh-0      | 7169 | -4.132  |
| Sg-1      | 7344 | -4.086  |
| Stw-0     | 8388 | -4.081  |
| Yo-0      | 6983 | -4.049  |
| Eds-1     | 6016 | -3.994  |
| Ca-0      | 7062 | -3.948  |
| Tiv-1     | 7355 | -3.838  |
| Tottarp-2 | 6243 | -3.78   |
| Bs-2      | 7004 | -3.739  |
| Rmx-A180  | 7525 | -3.734  |
| NFA-8     | 6944 | -3.576  |

|            |      |         |
|------------|------|---------|
| In-0       | 8311 | -3.532  |
| Tha-1      | 7353 | -3.493  |
| Sha        | 6962 | -3.4835 |
| Old-1      | 7280 | -3.4545 |
| Krot-2     | 7205 | -3.443  |
| Spr1-6     | 6965 | -3.4375 |
| Li-7       | 7231 | -3.347  |
| Rou-0      | 7320 | -3.344  |
| Ör-1       | 6074 | -3.337  |
| Nd-1       | 6942 | -3.185  |
| Is-1       | 7176 | -3.145  |
| Lc-0       | 8323 | -3.126  |
| Wc-1       | 7404 | -3.0835 |
| Hey-1      | 7166 | -3.0025 |
| Kni-1      | 6040 | -3.002  |
| PAR-8      | 262  | -2.9945 |
| Ma-2       | 7246 | -2.964  |
| Mc-0       | 7252 | -2.9355 |
| Ors-1      | 7283 | -2.931  |
| Mnz-0      | 7244 | -2.7975 |
| Lo-2       | 7242 | -2.791  |
| Ei-2       | 6915 | -2.713  |
| Po-1       | 7309 | -2.712  |
| Uk-1       | 7378 | -2.7105 |
| Ove-0      | 7287 | -2.705  |
| Gy-0       | 8214 | -2.693  |
| MIB-86     | 224  | -2.688  |
| Ullapool-3 | 9308 | -2.681  |

|          |      |         |
|----------|------|---------|
| HR-10    | 6923 | -2.68   |
| Liarum   | 8241 | -2.6025 |
| Si-0     | 7337 | -2.591  |
| Bu-0     | 8271 | -2.5475 |
| Ang-0    | 6992 | -2.535  |
| CIBC-17  | 6907 | -2.529  |
| FOR-5    | 936  | -2.484  |
| Lp2-2    | 7520 | -2.443  |
| Pi-2     | 7299 | -2.373  |
| Boot-1   | 7026 | -2.3665 |
| PHW-2    | 8243 | -2.337  |
| Bor-4    | 6903 | -2.296  |
| RRS-10   | 7515 | -2.19   |
| Br-0     | 6904 | -2.085  |
| HR-5     | 6924 | -2.0665 |
| Te-0     | 7352 | -2.035  |
| Bå4-1    | 8258 | -1.978  |
| Ba-1     | 7014 | -1.9295 |
| Do-0     | 7102 | -1.8135 |
| Gu-0     | 6922 | -1.811  |
| Hau-0    | 7164 | -1.79   |
| Frd-1    | 5742 | -1.781  |
| Vimmerby | 8249 | -1.751  |
| Amel-1   | 6990 | -1.7245 |
| Ka-0     | 8314 | -1.721  |
| Ema-1    | 5736 | -1.675  |
| Ker-38   | 1782 | -1.667  |
| Col-0    | 6909 | -1.639  |

|         |      |         |
|---------|------|---------|
| Mrk-0   | 6937 | -1.538  |
| Lp2-6   | 7521 | -1.4565 |
| LAC-5   | 96   | -1.4495 |
| St-0    | 8387 | -1.408  |
| Mt-0    | 6939 | -1.358  |
| Pla-0   | 7300 | -1.257  |
| Kyl-1   | 5751 | -1.245  |
| Or-0    | 7282 | -1.1215 |
| Chat-1  | 7071 | -1.082  |
| Jm-1    | 7178 | -1.049  |
| Je-0    | 7181 | -1.0155 |
| Ste-3   | 2290 | -0.944  |
| Ob-0    | 7276 | -0.937  |
| Van-0   | 6977 | -0.907  |
| Drall-1 | 8284 | -0.8735 |
| UII2-3  | 6973 | -0.862  |
| Map-42  | 2057 | -0.861  |
| Coc-1   | 5729 | -0.849  |
| Bla-1   | 7015 | -0.8225 |
| Pna-10  | 7526 | -0.753  |
| Can-0   | 8274 | -0.7225 |
| Na-1    | 8343 | -0.6005 |
| Tamm-27 | 6969 | -0.383  |
| WAR     | 7477 | -0.2485 |
| Aa-0    | 7000 | -0.1495 |
| Sq-1    | 6966 | -0.122  |
| Nw-0    | 8348 | -0.013  |
| Ren-1   | 6959 | 0.086   |

|           |      |        |
|-----------|------|--------|
| Benk-1    | 7008 | 0.0985 |
| Kin-0     | 6926 | 0.138  |
| Nok-3     | 6945 | 0.194  |
| Mh-0      | 7255 | 0.235  |
| Li-3      | 7224 | 0.2435 |
| Kno-10    | 6927 | 0.2825 |
| Baa-1     | 7002 | 0.365  |
| Cala-8    | 9152 | 0.495  |
| Lip-0     | 8325 | 0.5275 |
| MIB-60    | 204  | 0.609  |
| Rsch-4    | 8374 | 0.823  |
| Pf-0      | 7297 | 0.8845 |
| Pu2-23    | 6951 | 1.113  |
| Se-0      | 6961 | 1.137  |
| Ri-0      | 7317 | 1.2275 |
| Hs-0      | 8310 | 1.5085 |
| Bå5-1     | 8259 | 1.739  |
| Hov4-1    | 8306 | 1.836  |
| Per-1     | 8354 | 1.888  |
| HSm       | 8236 | 1.932  |
| Pr-0      | 7310 | 1.959  |
| Bch-1     | 7028 | 1.966  |
| Uod-7     | 6976 | 2.15   |
| La-1      | 7210 | 2.151  |
| Lag1-6    | 9104 | 2.2465 |
| Seattle-0 | 8245 | 2.307  |
| Gel-1     | 7143 | 2.423  |
| Pna-17    | 7523 | 2.689  |

|            |      |        |
|------------|------|--------|
| Ren-11     | 6960 | 2.7725 |
| Nw-4       | 7262 | 2.878  |
| Ms-0       | 6938 | 3.0755 |
| Kulturen-1 | 8240 | 3.106  |
| Paw-26     | 2171 | 3.12   |
| MNF-Pot-80 | 1874 | 3.232  |
| Pu2-7      | 6956 | 3.232  |
| Dem-4      | 8233 | 3.4155 |
| Wei-0      | 6979 | 3.569  |
| Lu-1       | 8334 | 3.596  |
| Bor-1      | 5837 | 3.755  |
| RRS-7      | 7514 | 4.6    |
| Mir-0      | 8337 | 4.6705 |
| Pn-0       | 7307 | 4.708  |
| Gr-1       | 8300 | 5.059  |
| Lz-0       | 6936 | 5.67   |
| Chr-1      | 5723 | 6.5405 |

**Table S5. Median “Root Angle” on DAG 4 of 257 *Arabidopsis thaliana* accessions.**

| <b>Name</b> | <b>Origin</b> | <b>ACC_ID</b> |
|-------------|---------------|---------------|
| Aa-0        | GER           | 7000          |
| Ag-0        | FR            | 6897          |
| Ak-1        | GER           | 6987          |
| Algutsrum   | SWE           | 8230          |
| Amel-1      | NLD           | 6990          |
| An-1        | BEL           | 6898          |
| Ang-0       | BEL           | 6992          |

|         |     |      |
|---------|-----|------|
| Ann-1   | FR  | 6994 |
| Arby-1  | SWE | 6998 |
| Ba-1    | UK  | 7014 |
| Bå1-2   | SWE | 8256 |
| Bå4-1   | SWE | 8258 |
| Bå5-1   | SWE | 8259 |
| Baa-1   | NLD | 7002 |
| Bay-0   | GER | 6899 |
| Bch-1   | GER | 7028 |
| Benk-1  | NLD | 7008 |
| Bla-1   | ESP | 7015 |
| Blh-1   | CZ  | 8265 |
| Boot-1  | UK  | 7026 |
| Bor-1   | CZE | 5837 |
| Bor-4   | CZE | 6903 |
| Br-0    | CZE | 6904 |
| Brö1-6  | SWE | 8231 |
| Bs-1    | SUI | 8270 |
| Bs-2    | SUI | 7004 |
| Bsch-0  | GER | 7031 |
| Bu-0    | GER | 8271 |
| Bur-0   | IRL | 5719 |
| C24     | POR | 6906 |
| Ca-0    | GER | 7062 |
| Cala-8  | ESP | 9152 |
| Can-0   | ESP | 8274 |
| Chat-1  | FRA | 7071 |
| Chr-1   | UK  | 5723 |
| CIBC-17 | UK  | 6907 |

|             |     |      |
|-------------|-----|------|
| CIBC-5      | UK  | 6730 |
| Cit-0       | FRA | 7075 |
| Co          | POR | 7081 |
| Coc-1       | ESP | 5729 |
| Col-0       | USA | 6909 |
| Com-1       | FRA | 7092 |
| CrI-1       | UK  | 5731 |
| Ct-1        | ITA | 6910 |
| CUR-8       | FRA | 86   |
| Cvi-0       | CPV | 6911 |
| Da-0        | GER | 7094 |
| Dem-4       | USA | 8233 |
| Di-1        | FRA | 7098 |
| Do-0        | GER | 7102 |
| Drall-1     | CZE | 8284 |
| Dralll-1    | CZE | 8285 |
| Duk         | CZE | 6008 |
| Eden-2      | SWE | 6913 |
| Edinburgh-5 | UK  | 9302 |
| Eds-1       | SWE | 6016 |
| Ei-2        | GER | 6915 |
| EM-183      | UK  | 461  |
| Ema-1       | UK  | 5736 |
| En-1        | GER | 8290 |
| Ep-0        | GER | 7123 |
| Es-0        | FIN | 7126 |
| Est-1       | RUS | 6916 |
| Fäb-4       | SWE | 6918 |
| Fei-0       | POR | 8215 |



|        |     |      |
|--------|-----|------|
| FOR-5  | UK  | 936  |
| Frd-1  | UK  | 5742 |
| Ga-0   | GER | 6919 |
| Gd-1   | GER | 8296 |
| Ge-0   | SUI | 8297 |
| Gel-1  | NLD | 7143 |
| Gie-0  | GER | 7147 |
| Got-22 | GER | 6920 |
| Got-7  | GER | 6921 |
| Gr-1   | AUT | 8300 |
| Gu-0   | GER | 6922 |
| Gy-0   | FRA | 8214 |
| Ha-0   | GER | 7163 |
| Hau-0  | DEK | 7164 |
| Hey-1  | NLD | 7166 |
| Hh-0   | GER | 7169 |
| Hi-0   | NLD | 8304 |
| Hil-1  | UK  | 5745 |
| HI-3   | GER | 7172 |
| Hov4-1 | SWE | 8306 |
| HR-10  | UK  | 6923 |
| HR-5   | UK  | 6924 |
| Hs-0   | GER | 8310 |
| HSm    | CZE | 8236 |
| In-0   | AUT | 8311 |
| Is-0   | GER | 8312 |
| Is-1   | DE  | 7176 |
| Je-0   | GER | 7181 |
| Jl-3   | CZE | 7424 |

|               |     |      |
|---------------|-----|------|
| Jm-0          | CZE | 8313 |
| Jm-1          | CZE | 7178 |
| Ka-0          | AUT | 8314 |
| Kelsterbach-4 | GER | 8420 |
| Ker-38        | USA | 1782 |
| Kil-0         | UK  | 7192 |
| Kin-0         | USA | 6926 |
| KI-5          | GER | 7199 |
| Kni-1         | SWE | 6040 |
| Kno-10        | USA | 6927 |
| Kno-18        | USA | 6928 |
| Köln          | GER | 8239 |
| Kondara       | TJK | 6929 |
| Kr-0          | GER | 7201 |
| Krot-2        | GER | 7205 |
| Kulturen-1    | SWE | 8240 |
| Kyl-1         | UK  | 5751 |
| Kz-1          | KAZ | 6930 |
| Kz-9          | KAZ | 6931 |
| La-1          | GER | 7210 |
| LAC-5         | LAC | 96   |
| Lag1-6        | GEO | 9104 |
| Lan-1         | UK  | 5752 |
| Lc-0          | UK  | 8323 |
| LDV-58        | FRA | 149  |
| Ler-1         | GER | 6932 |
| Li-3          | GER | 7224 |
| Li-7          | GER | 7231 |
| Liarum        | SWE | 8241 |

|            |     |      |
|------------|-----|------|
| Lip-0      | POL | 8325 |
| LL-0       | ESP | 6933 |
| Lm-2       | FRA | 8329 |
| Lo-2       | GER | 7242 |
| Lp2-2      | CZ  | 7520 |
| Lp2-6      | CZE | 7521 |
| Lu-1       | SE  | 8334 |
| Lz-0       | FR  | 6936 |
| Ma-2       | DE  | 7246 |
| Map-42     | USA | 2057 |
| Mc-0       | UK  | 7252 |
| Mdn-1      | USA | 1829 |
| Mh-0       | PL  | 7255 |
| MIB-60     | FR  | 204  |
| MIB-86     | FR  | 224  |
| Mir-0      | IT  | 8337 |
| MNF-Pot-80 | USA | 1874 |
| Mnz-0      | DE  | 7244 |
| MOG-11     | FR  | 236  |
| Mr-0       | ITA | 7522 |
| Mrk-0      | GER | 6937 |
| MS-0       | RU  | 6938 |
| Mt-0       | LY  | 6939 |
| Mz-0       | DE  | 6940 |
| N13        | RUS | 7438 |
| Na-1       | FR  | 8343 |
| Nd-1       | CH  | 6942 |
| NFA-10     | UK  | 6943 |
| NFA-8      | UK  | 6944 |

|        |     |      |
|--------|-----|------|
| No-0   | DE  | 7275 |
| Nok-3  | NLD | 6945 |
| Np-0   | DE  | 7268 |
| Nw-0   | DE  | 8348 |
| Nw-4   | DE  | 7262 |
| Nyl-2  | SWE | 6064 |
| Ob-0   | DE  | 7276 |
| Old-1  | DE  | 7280 |
| ÖMö2-3 | SWE | 7519 |
| Or-0   | DE  | 7282 |
| Ör-1   | SWE | 6074 |
| Ors-1  | ROM | 7283 |
| Ost-0  | SWE | 8351 |
| Ove-0  | DE  | 7287 |
| Oy-0   | NO  | 6946 |
| Pa-1   | ITA | 8353 |
| Pa-2   | IT  | 7291 |
| PAR-8  | FR  | 262  |
| Paw-26 | US  | 2171 |
| Pent-1 | USA | 2187 |
| Per-1  | RU  | 8354 |
| Pf-0   | DE  | 7297 |
| PHW-2  | IT  | 8243 |
| Pi-2   | AT  | 7299 |
| Pla-0  | ES  | 7300 |
| Pn-0   | FR  | 7307 |
| Pna-10 | USA | 7526 |
| Pna-17 | USA | 7523 |
| Po-1   | DE  | 7309 |

|           |     |      |
|-----------|-----|------|
| Pog-0     | CA  | 7306 |
| Pr-0      | DE  | 7310 |
| Pro-0     | ESP | 8213 |
| Pu2-23    | CZ  | 6951 |
| Pu2-7     | CZ  | 6956 |
| Ra-0      | FR  | 6958 |
| Rak-2     | CZE | 8365 |
| RAN       | FR  | 266  |
| Rd-0      | DE  | 8366 |
| Ren-1     | FR  | 6959 |
| Ren-11    | FR  | 6960 |
| Rev-1     | SWE | 8369 |
| Rhen-1    | NLD | 7316 |
| Ri-0      | CA  | 7317 |
| Rmx-A02   | USA | 7524 |
| Rmx-A180  | US  | 7525 |
| Rou-0     | FR  | 7320 |
| RRS-10    | USA | 7515 |
| RRS-7     | USA | 7514 |
| Rsch-4    | RU  | 8374 |
| San-2     | SWE | 8247 |
| Sanna-2   | SWE | 8376 |
| Sap-0     | CZ  | 8378 |
| Sapporo-0 | JP  | 7330 |
| Se-0      | ES  | 6961 |
| Seattle-0 | US  | 8245 |
| Sg-1      | DE  | 7344 |
| Sh-0      | DE  | 7331 |
| Shahdara  | TJ  | 6962 |

|           |     |      |
|-----------|-----|------|
| Si-0      | DE  | 7337 |
| Sorbo     | TJ  | 6963 |
| Spr1-6    | SWE | 6965 |
| Sq-1      | UK  | 6966 |
| Sq-8      | UK  | 6967 |
| St-0      | SE  | 8387 |
| Ste-3     | US  | 2290 |
| Stw-0     | RU  | 8388 |
| Tamm-2    | FIN | 6968 |
| Tamm-27   | FIN | 6969 |
| Te-0      | FI  | 7352 |
| Tha-1     | NL  | 7353 |
| Ting-1    | SWE | 7354 |
| Tiv-1     | ITA | 7355 |
| Tottarp-2 | SE  | 6243 |
| TOU-J-3   | FRA | 383  |
| Truk-5    | UA  | 9165 |
| Ts-1      | ES  | 6970 |
| Ts-5      | ESP | 6971 |
| Tscha-1   | AT  | 7372 |
| Tsu-1     | JP  | 6972 |
| Tu-0      | IT  | 8395 |
| Ty-0      | UK  | 7351 |
| Uk-1      | DE  | 7378 |
| UII2-3    | SE  | 6973 |
| Ullapol-3 | UK  | 9308 |

**Table S6. RegMap panel accessions used in the GWAS.**

| T-DNA        | avgAbsAng<br>P Value | Significant | COL-0<br>Mean | T-DNA<br>Mean | ATI       | Gene Name                                           |
|--------------|----------------------|-------------|---------------|---------------|-----------|-----------------------------------------------------|
| CS859638     | 0.485                |             | 13.5          | 14.2          | AT1G32050 | ATSCAMP5                                            |
| SALK_053469C | 0.729                |             | 14.5          | 13.8          | AT1G32080 | ATLRGB                                              |
| SALK_035509  | 0.325                |             | 16            | 14.5          | AT1G32210 | ATDAD1                                              |
| SALK_104469C | 0.88                 |             | 13.9          | 13.6          | AT1G32220 |                                                     |
| SALK_146277C | 0.0474               | *           | 14.2          | 12.2          | AT2G03820 | ATNMD3                                              |
| SALK_094846  | 0.102                |             | 13.8          | 11.9          | AT2G34930 |                                                     |
| SALK_042714C | 0.0107               | *           | 14.7          | 11.9          | AT3G01690 |                                                     |
| SALK_008357  | 9.2E-10              | ***         | 13            | 22.2          | AT3G22590 | PHP, CDC73                                          |
| SALK_150644C | 0.000000843          | ***         | 12.3          | 16.6          | AT3G22590 | PHP, CDC73                                          |
| SALK_007462C | 0.899                |             | 13            | 13.1          | AT3G22600 | LTPG5                                               |
| SALK_150636C | 0.111                |             | 12.5          | 10.5          | AT3G58180 |                                                     |
| SALK_135752  | 0.356                |             | 11            | 12.2          | AT4G17030 | AEXLB1,EXPR,AT-<br>EXPR,ATEXPR1,ATHEXPBETA3.1,EXLB1 |
| SALK_081121C | 0.659                |             | 12.3          | 11.8          | AT4G17070 |                                                     |
| SALK_119615C | 0.267                |             | 12.3          | 11.2          | AT4G24880 |                                                     |
| SALK_038436C | 0.471                |             | 13.3          | 12.5          | AT5G11420 |                                                     |
| SALK_119093C | 0.0166               | *           | 14.6          | 11.6          | AT5G43710 | MNS4                                                |
| SALK_129775C | 0.0421               | *           | 15.4          | 12.6          | AT5G55160 | SUM2,SUMO2,SUMO2,ATSUMO2                            |

**Table S7. T-DNA lines and their angles.**

| Line                            | Direction | Sequence                     |
|---------------------------------|-----------|------------------------------|
| PAP27_F                         | Forward   | CACCATGGCTAGGAATTTCTTGTTAGTG |
| PAP27_R                         | Reverse   | TGAAGCTAATGTGGTTGGCTC        |
| <i>AtEF1<math>\alpha</math></i> | Forward   | TGAGCACGCTCTTCTTGCTTTCA      |
| <i>AtEF1<math>\alpha</math></i> | Reverse   | GGTGGTGGCATCCATCTTGTTACA     |

**Table S8. Primer sequences**

| <i>S. lycopersicum</i> |            |             |         | <i>S. pennellii</i> |            |             |         |
|------------------------|------------|-------------|---------|---------------------|------------|-------------|---------|
| Gene                   | Symbol     | Expr. Count | Expr. Z | Gene                | Symbol     | Expr. Count | Expr. Z |
| Solyc05g012260         | SIPAP27-1  | 1880        | 0.66    | Sopen05g007090      | SpPAP27-1  | 1289        | 0.49    |
| Solyc08g083250         | SIPAP27-2  | 553         | 0.0015  | Sopen08g031440      | SpPAP27-2  | 753         | 0.16    |
| Solyc04g024640         | SIPAP27-3  | 0           | -0.27   | Sopen04g010490      | SpPAP27-3  | 1           | -0.31   |
| Solyc07g008570         | SIPAP27-4a | 325         | -0.11   | Sopen07g004500      | SpPAP27-4a | 1097        | 0.37    |

|                |            |     |       |                |            |     |       |
|----------------|------------|-----|-------|----------------|------------|-----|-------|
| Solyc07g008560 | SIPAP27-4b | NA  | NA    | Sopen07g004490 | SpPAP27-4b | NA  | NA    |
| Solyc07g008550 | SIPAP27-4c | 554 | 0.002 | Sopen07g004480 | SpPAP27-4c | 207 | -0.18 |
| (none)         |            | 207 | -0.18 | Sopen07g004470 | SpPAP27-4d | NA  | NA    |

**Table S9.** Homologous pairs, symbol names, and root tissue expression levels for selected purple acid phosphatase genes. Each row is pair of homologous genes in the two species. Based on these genes' similarities to ATPAP27 (AT5G50400) and on phylogenetic trees of these genes (**Figure S4, S5**), we assigned the symbolic names shown here to these genes. Expression values are RNA-seq for root tip tissue, normalized counts and Z-scaled (mean 0, standard deviation 1).
