# Supplementary material
Source: publisher figshare collection journal article supplement (https://gsajournals.figshare.com/articles/dataset/_/7237562)

Heatmap: ILs with significant p-value in trait comparison to M82  
ILs clustered by abs. Pearson corr. of p-value

(red/blue version for the color-impaired)

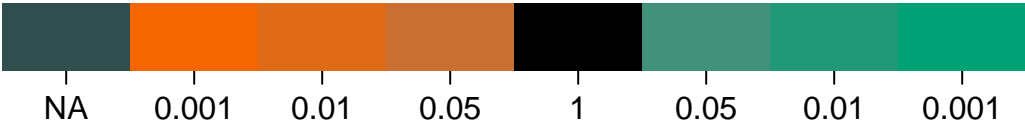

p-value threshold, red: mean < M82 mean, blugrn: mean > M82 mean

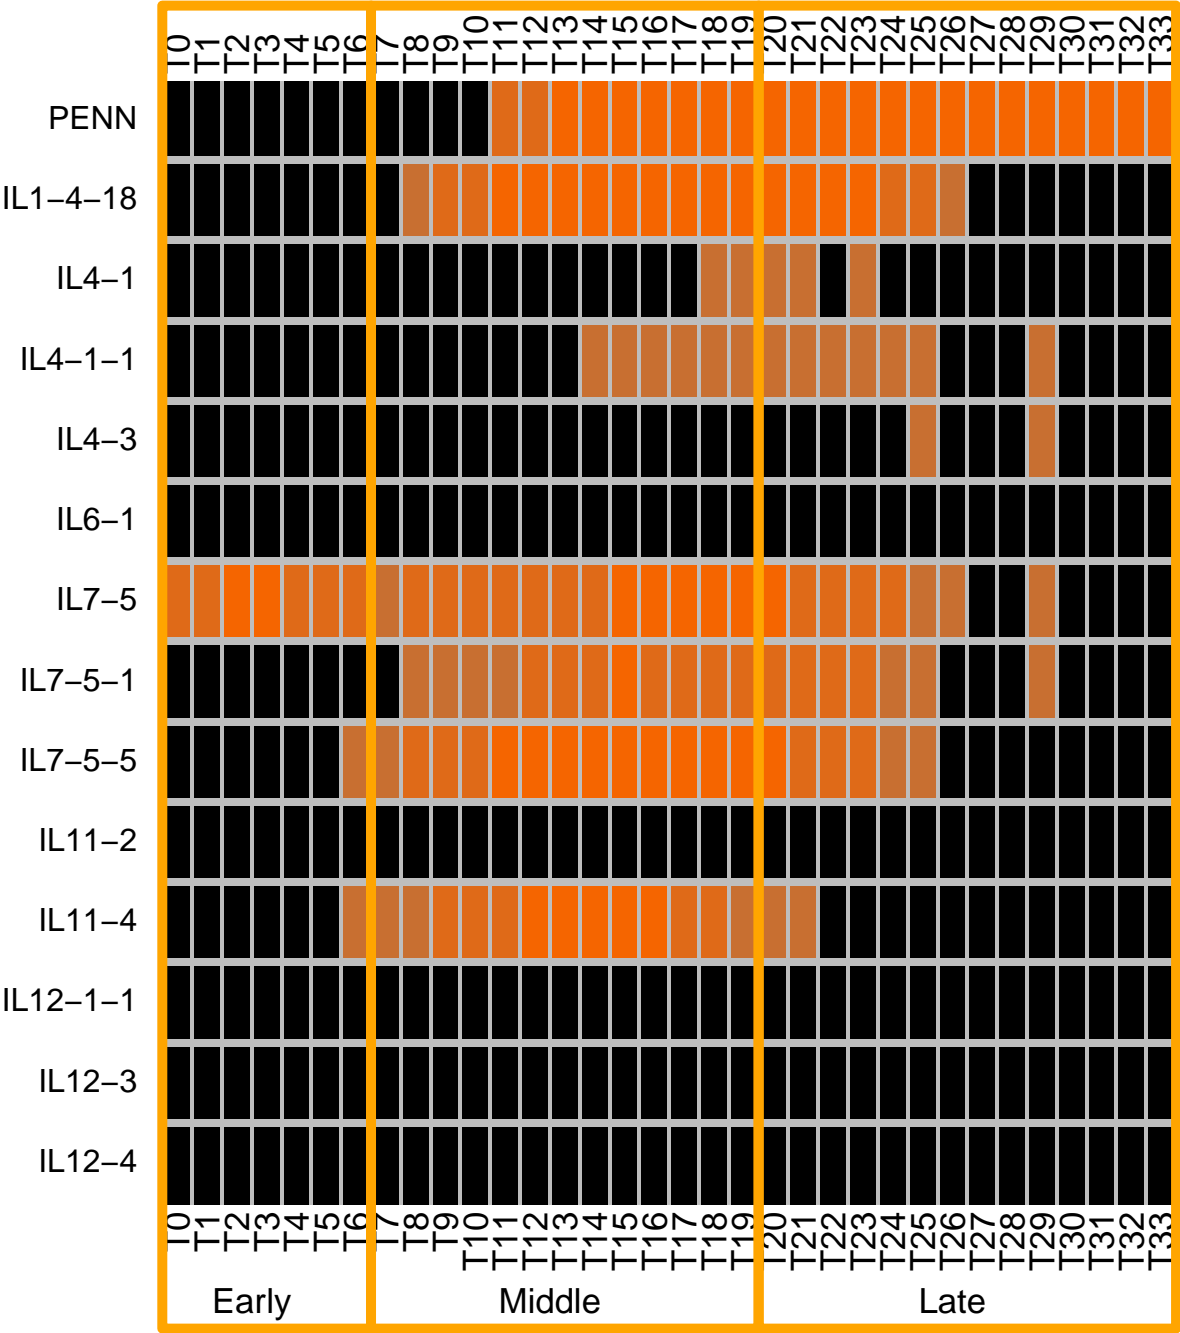

ILs clustered by abs. Pearson corr. of each trait's p-value for comparison to M82

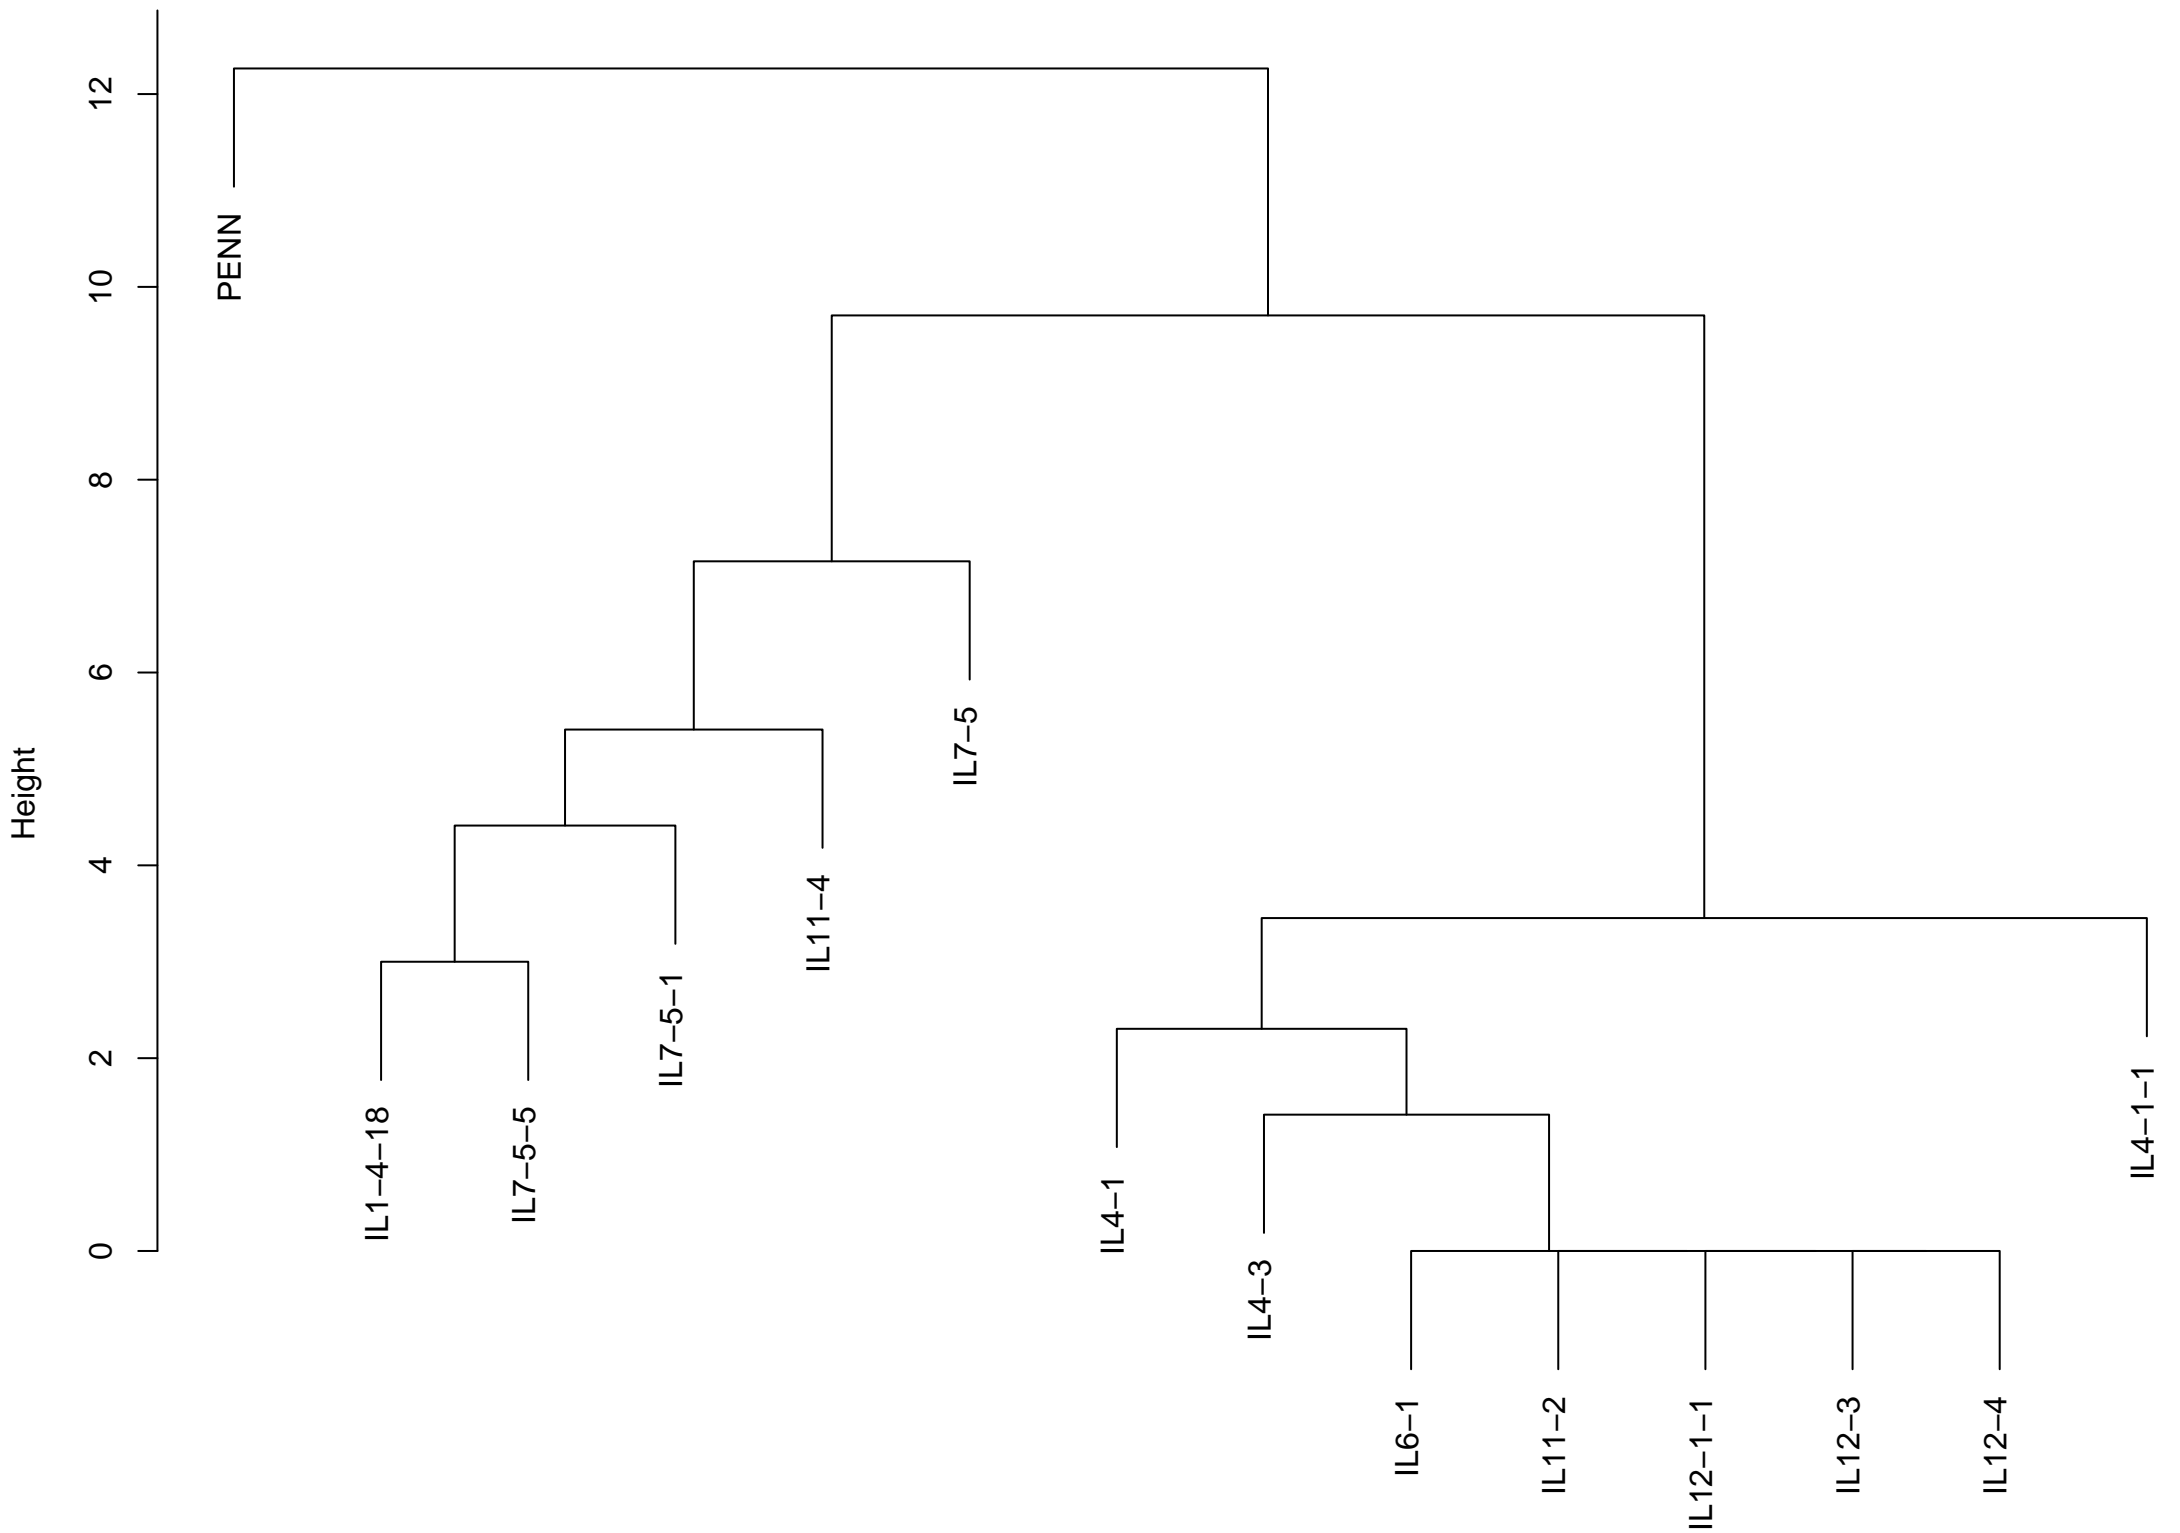

dfRow  
Agglomerative Coefficient = 0.75

Heatmap: ILs with significant p-value in trait comparison to M82  
ILs clustered by abs. Pearson corr. of p-value

(red/blue version for the color-impaired)

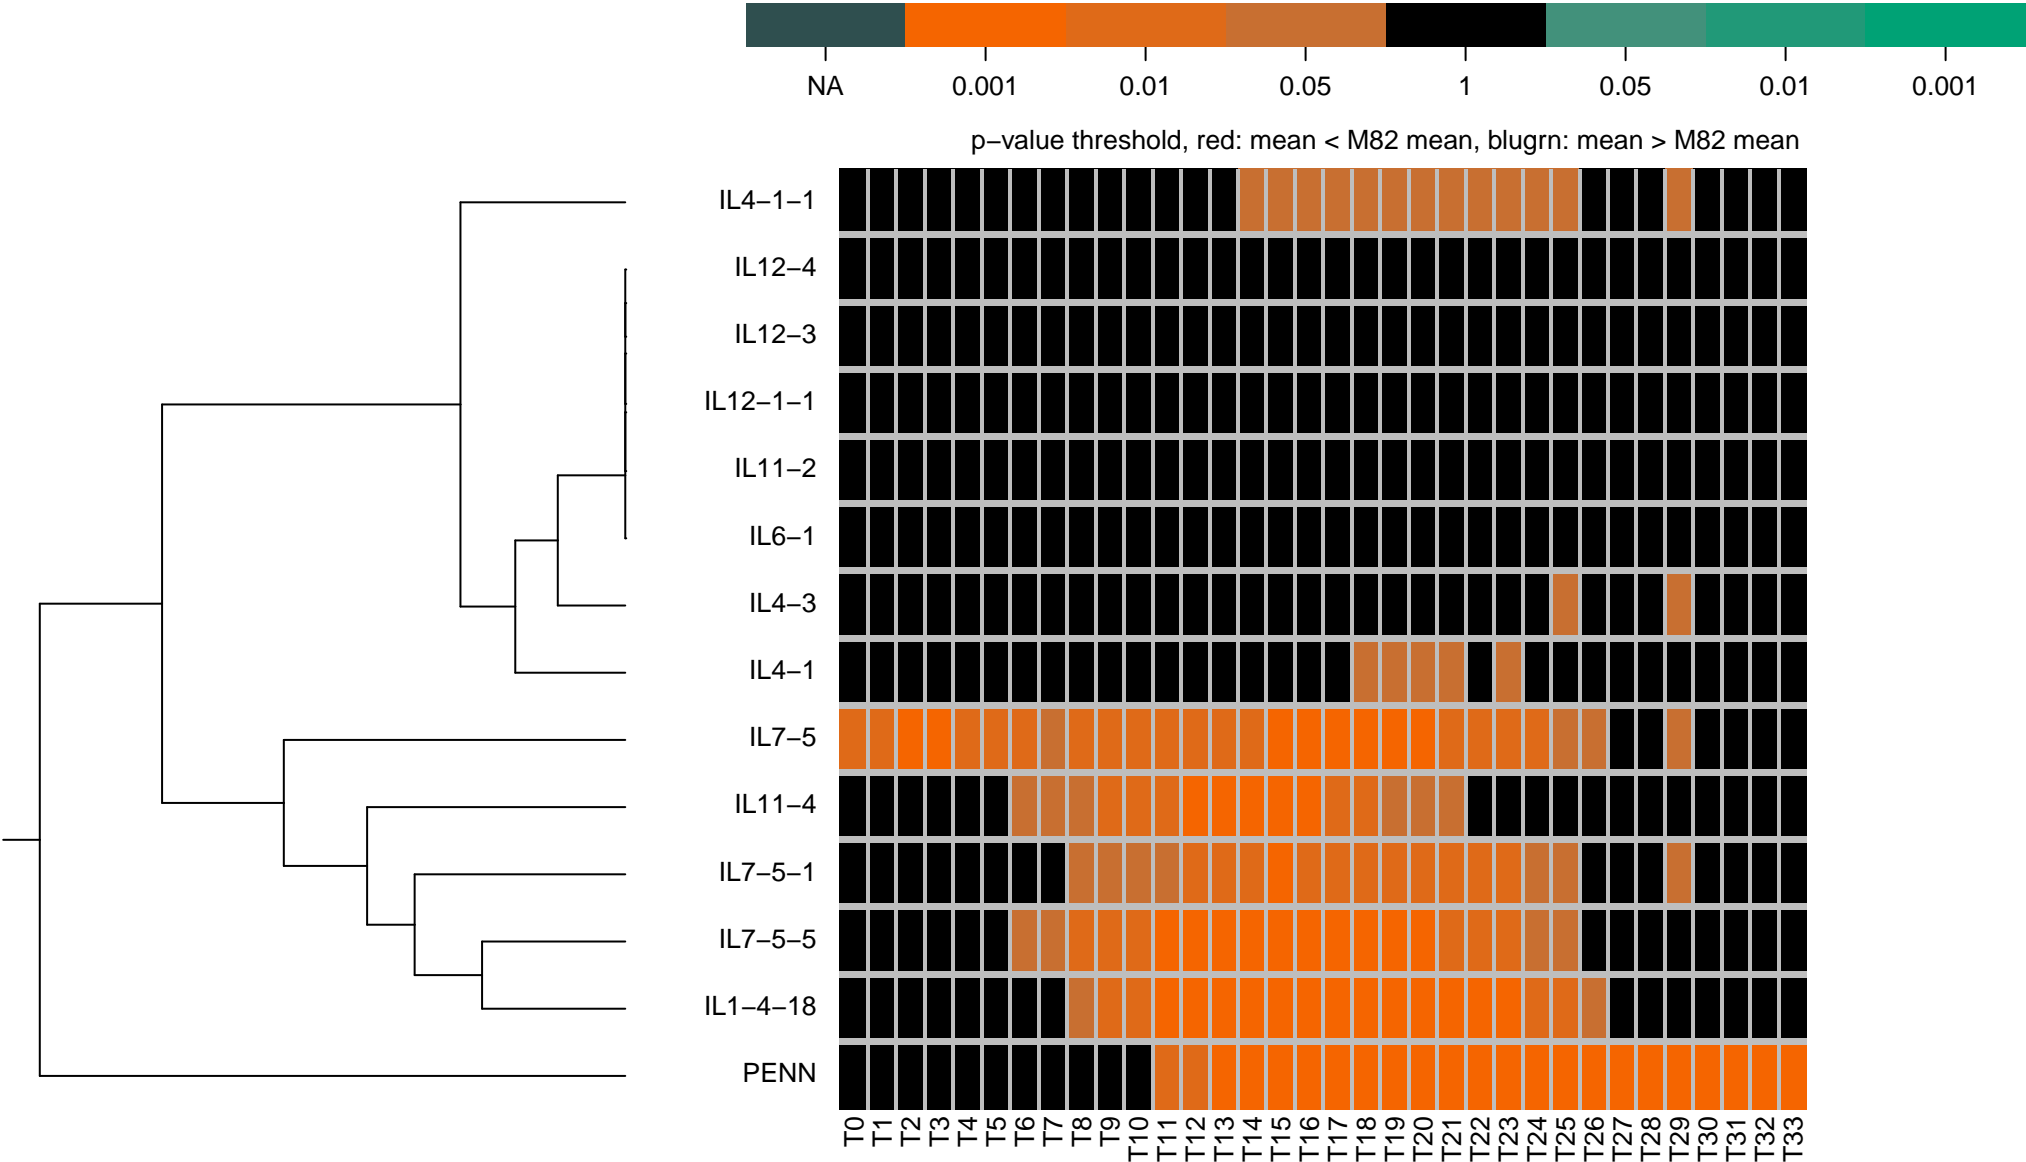

Supplement: Supplementary file 4 [file 2]
