# Supplementary material
Source: publisher figshare collection journal article supplement (https://gsajournals.figshare.com/articles/dataset/_/7237562)

(red/green version for the non-color-impaired)

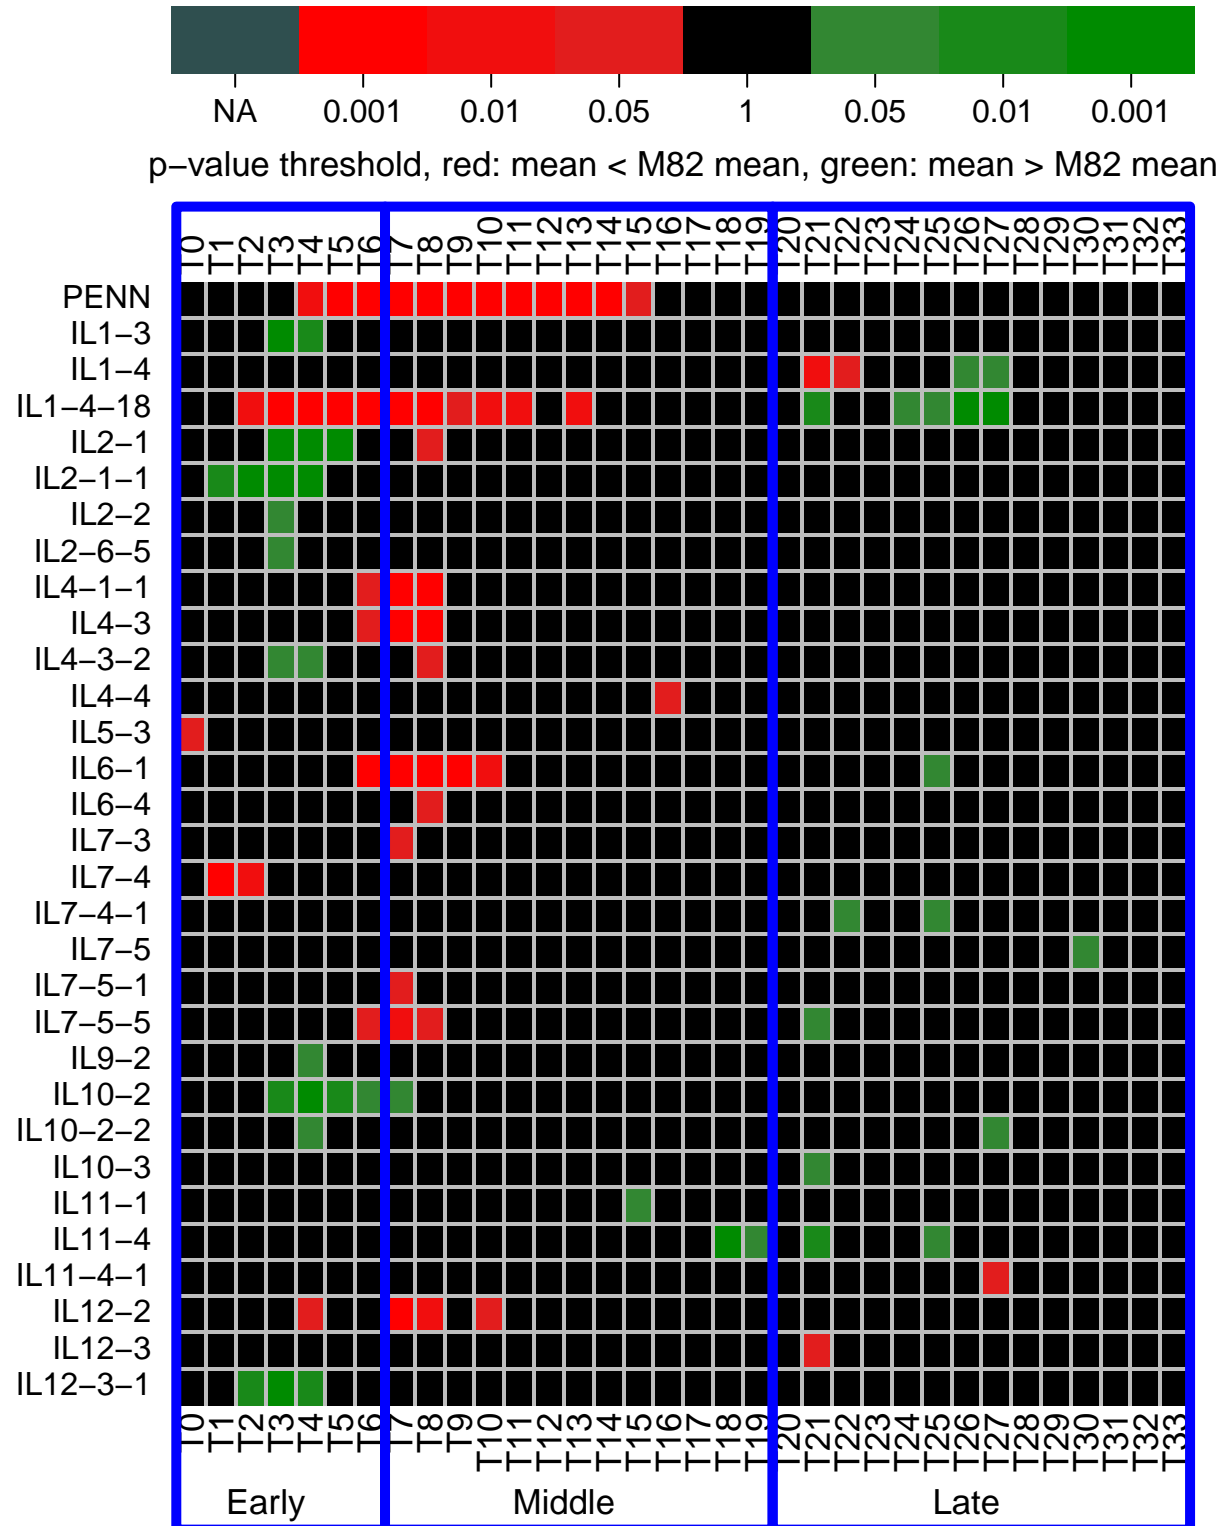

ILs clustered by abs. Pearson corr. of each trait's p-value for comparison to M82

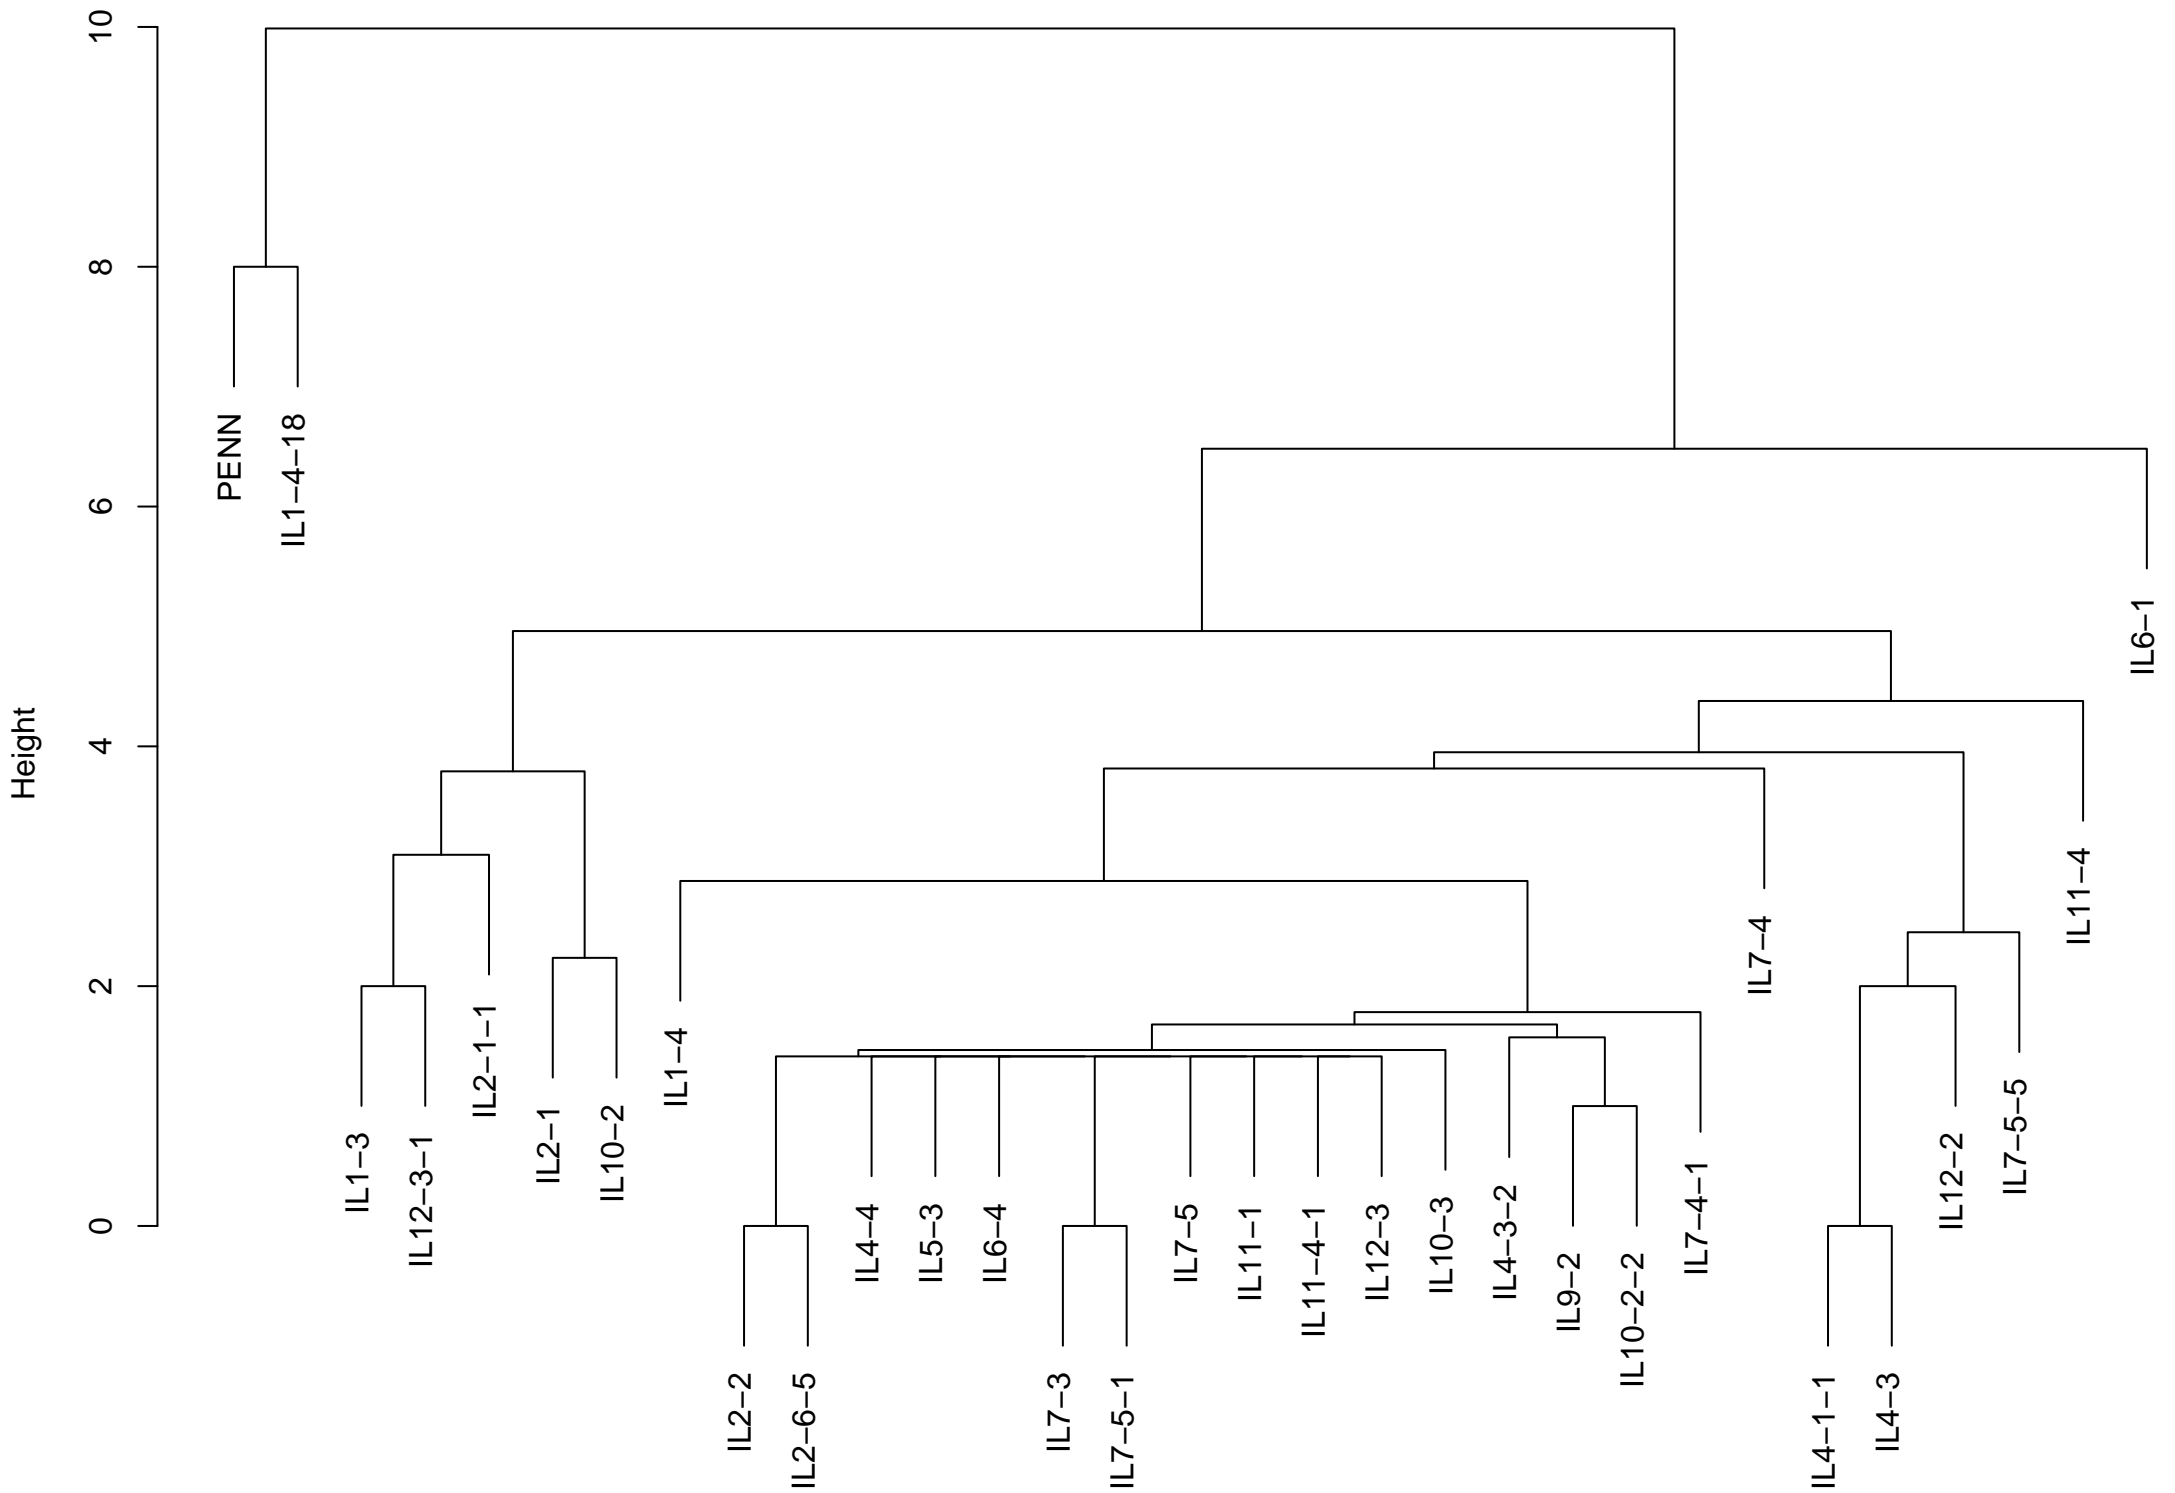

(red/green version for the non-color-impaired)

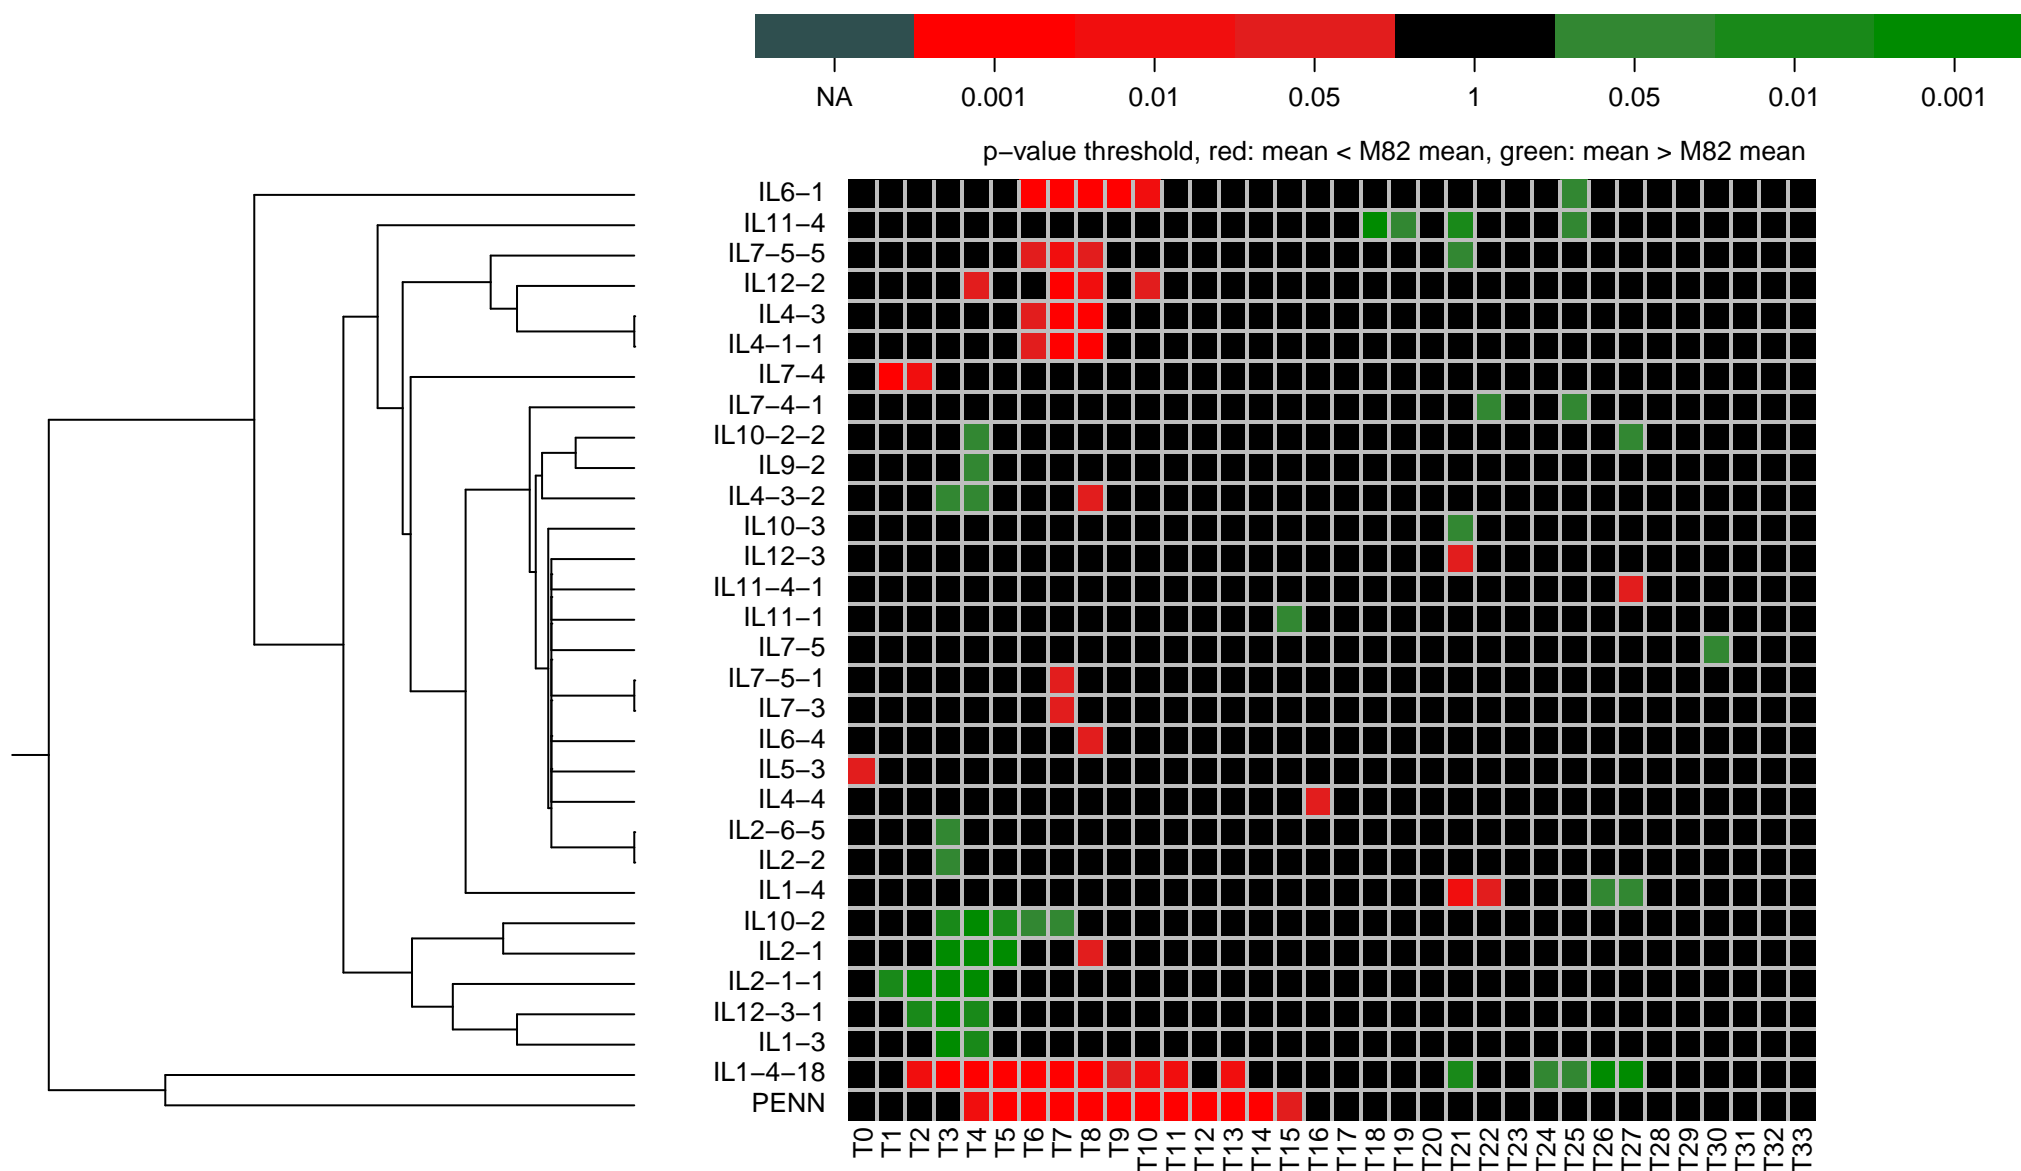

Supplement: Supplementary file 10 [file 2]
