# Supplementary material
Source: publisher figshare collection journal article supplement (https://gsajournals.figshare.com/articles/dataset/_/7237562)

# Intersections of ILs Sig. for Angle in each of 5 New Angle Measures

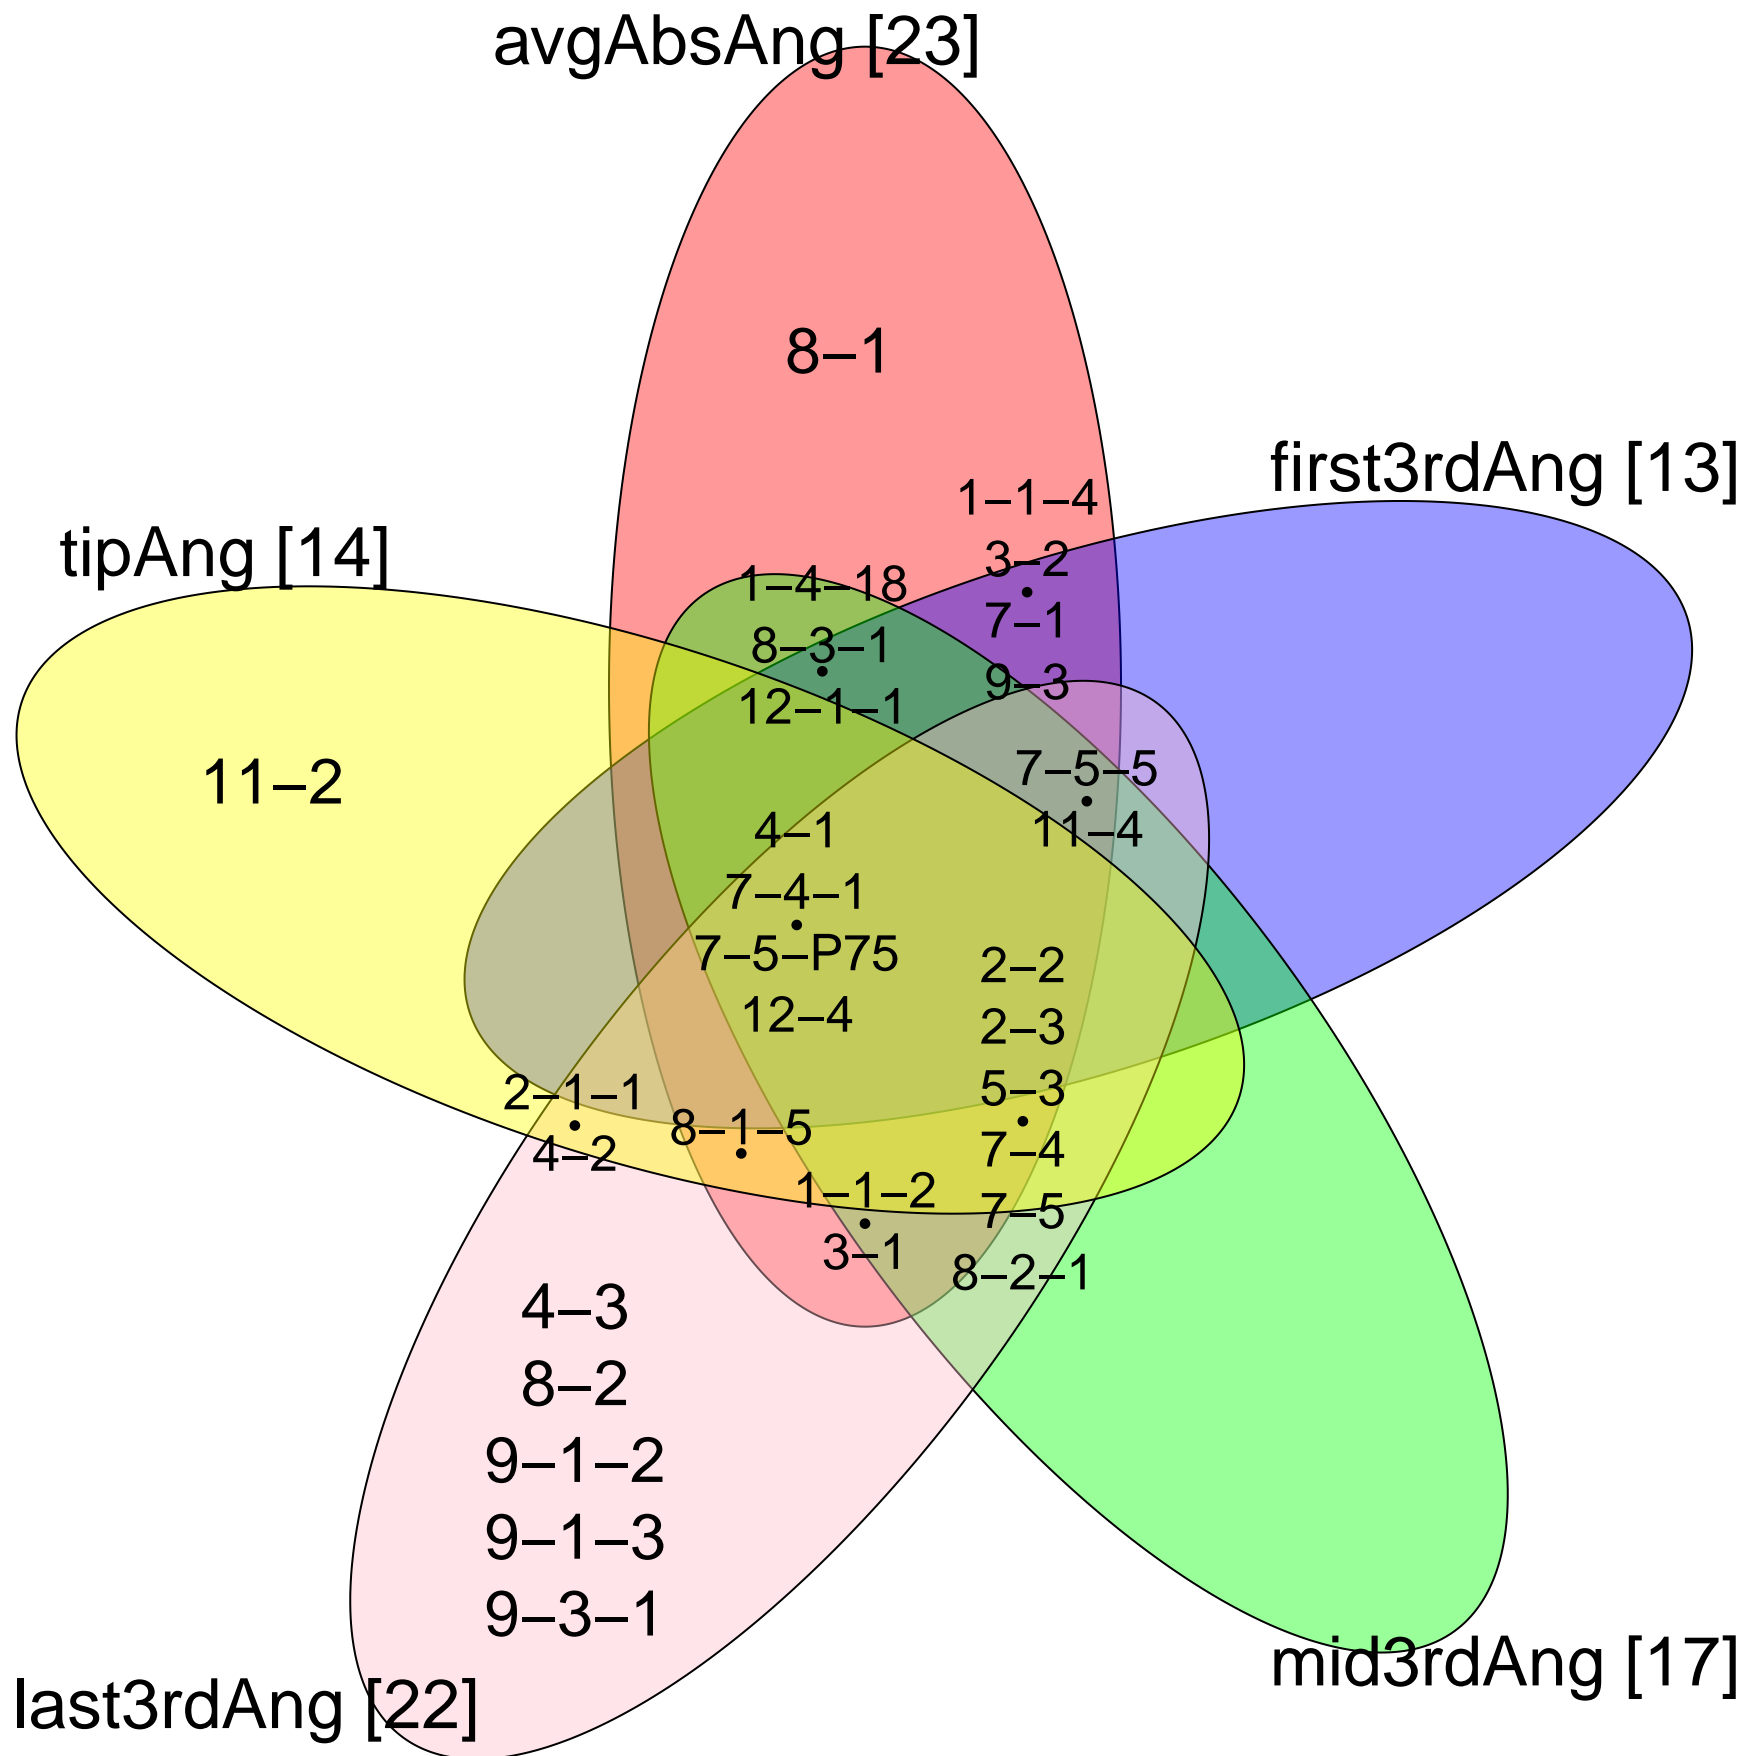

avgAbsAng [23]

first3rdAng [13]

gravity\_d5 [14]

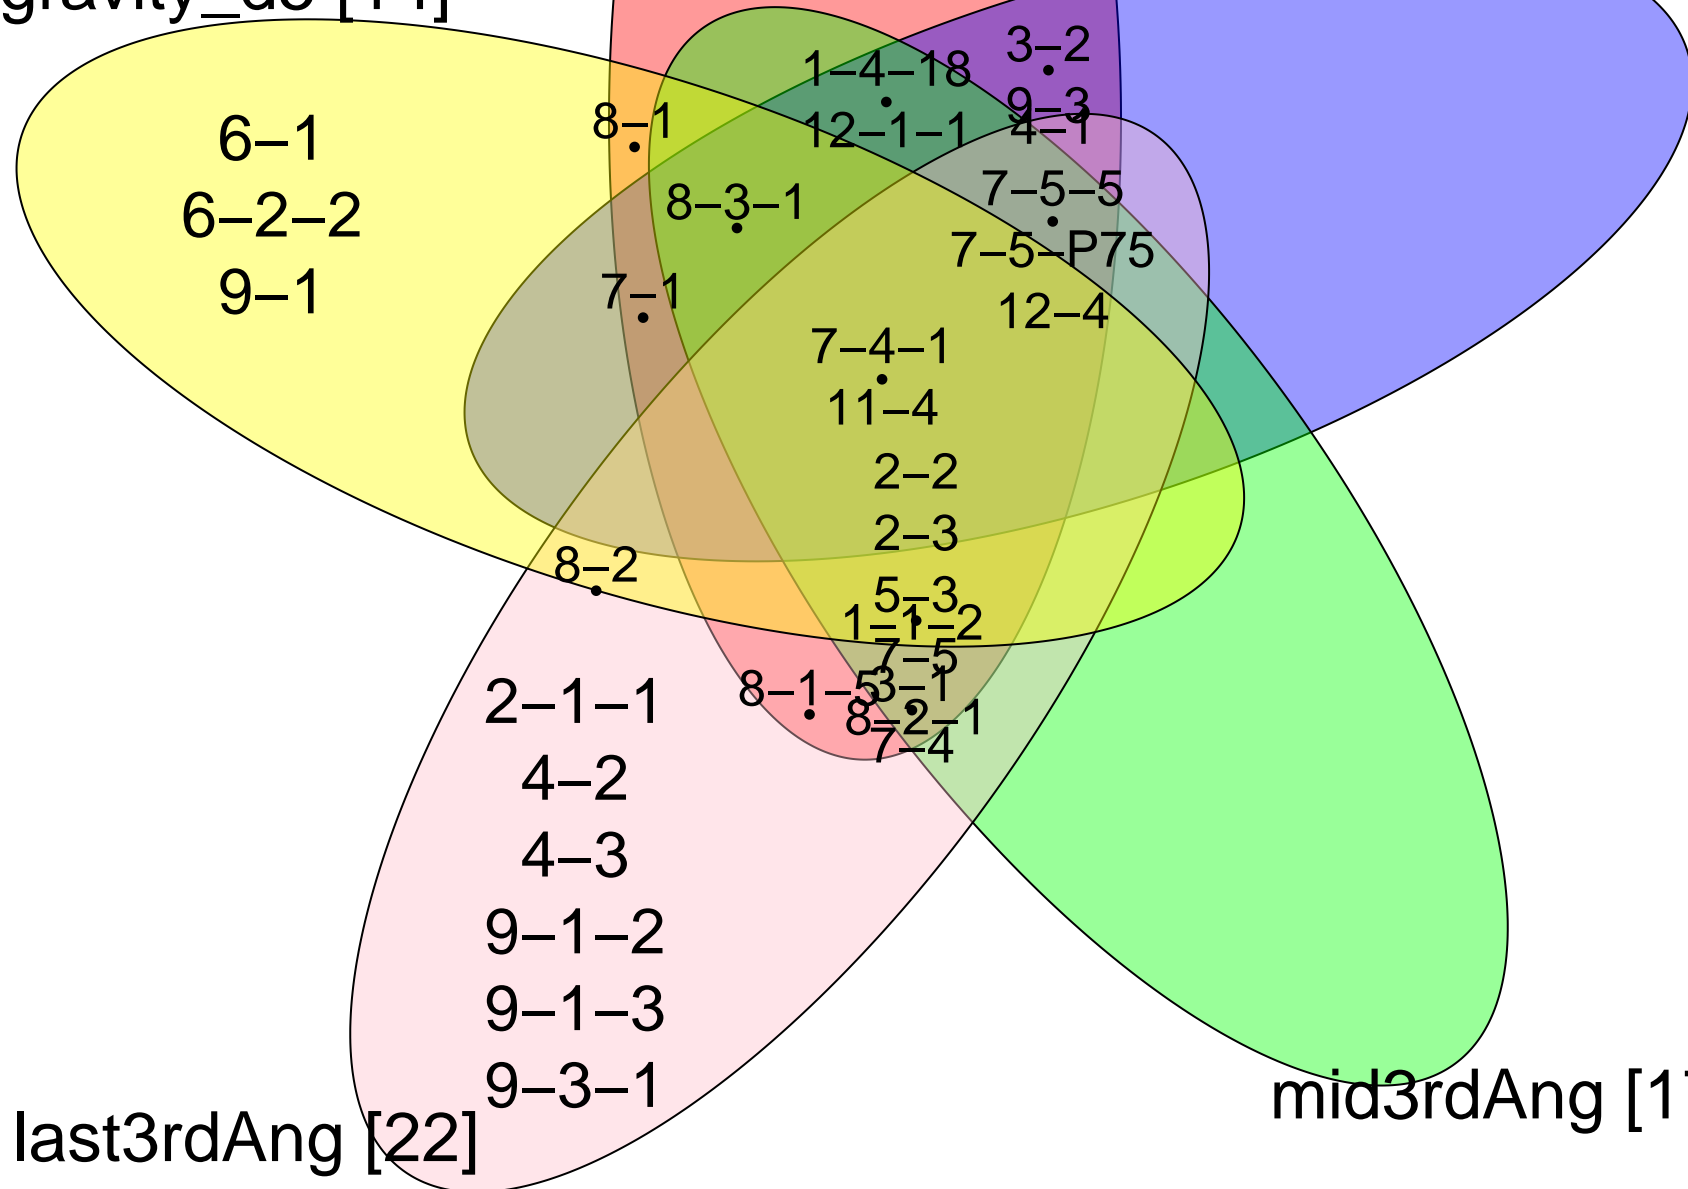

Supplement: Supplementary file 18 [file 2]
