# Supplementary material
Source: publisher figshare collection journal article supplement (https://gsajournals.figshare.com/articles/dataset/_/7237562)

Data for trait straightLen

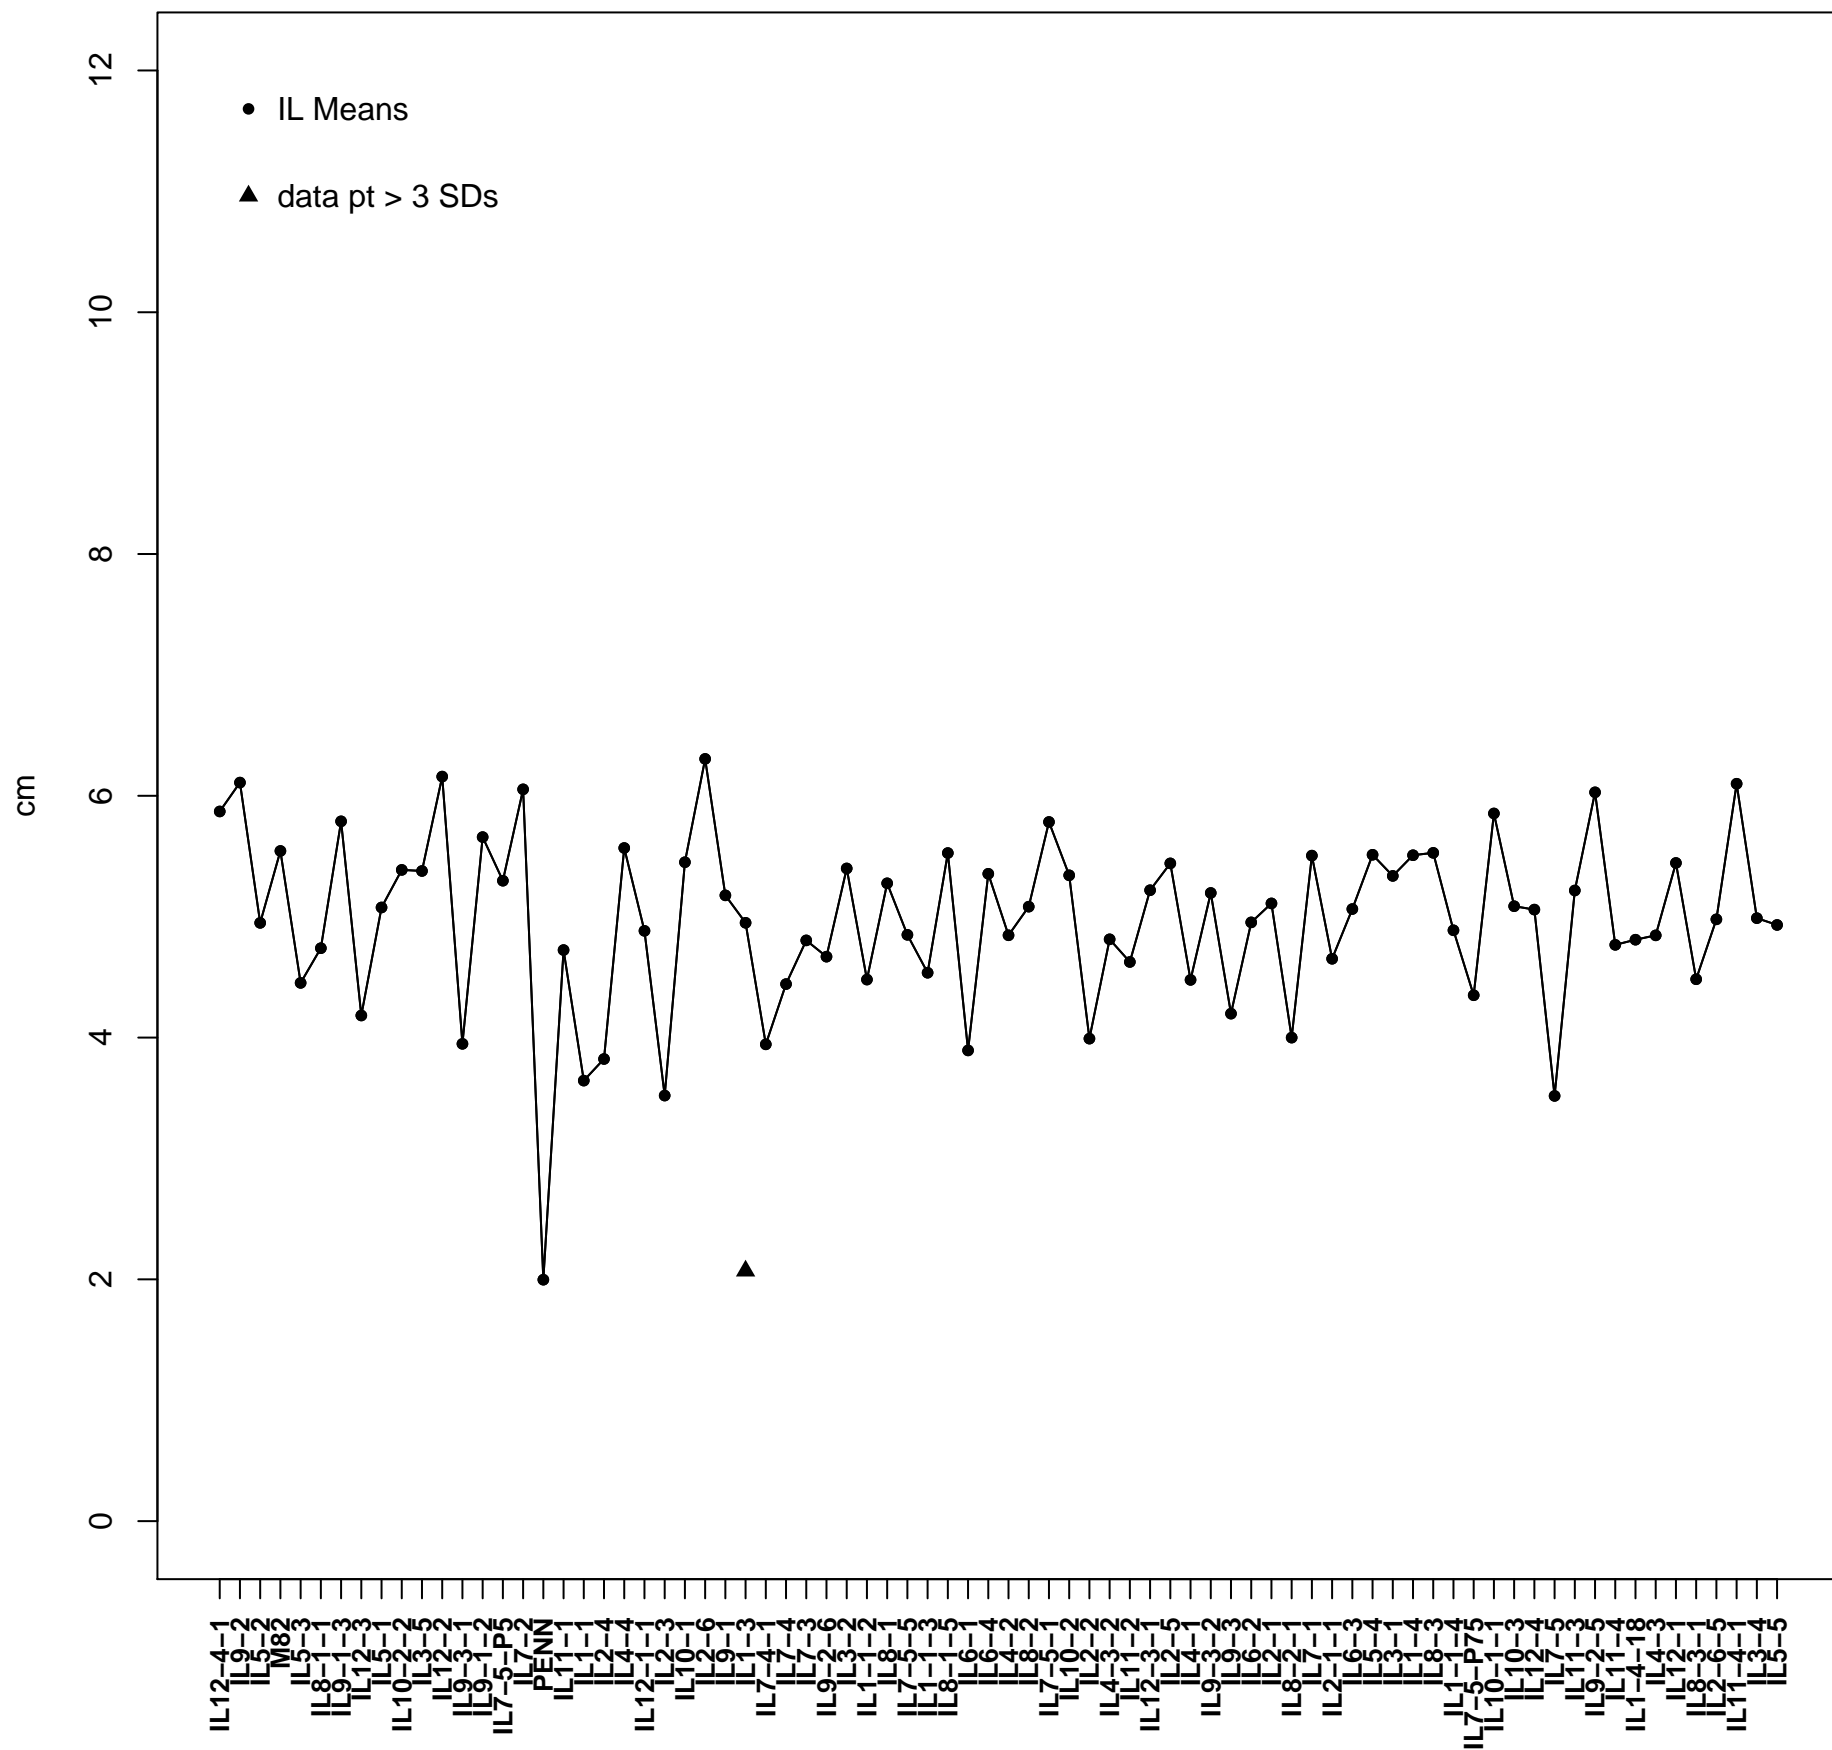

Data for trait rootLen

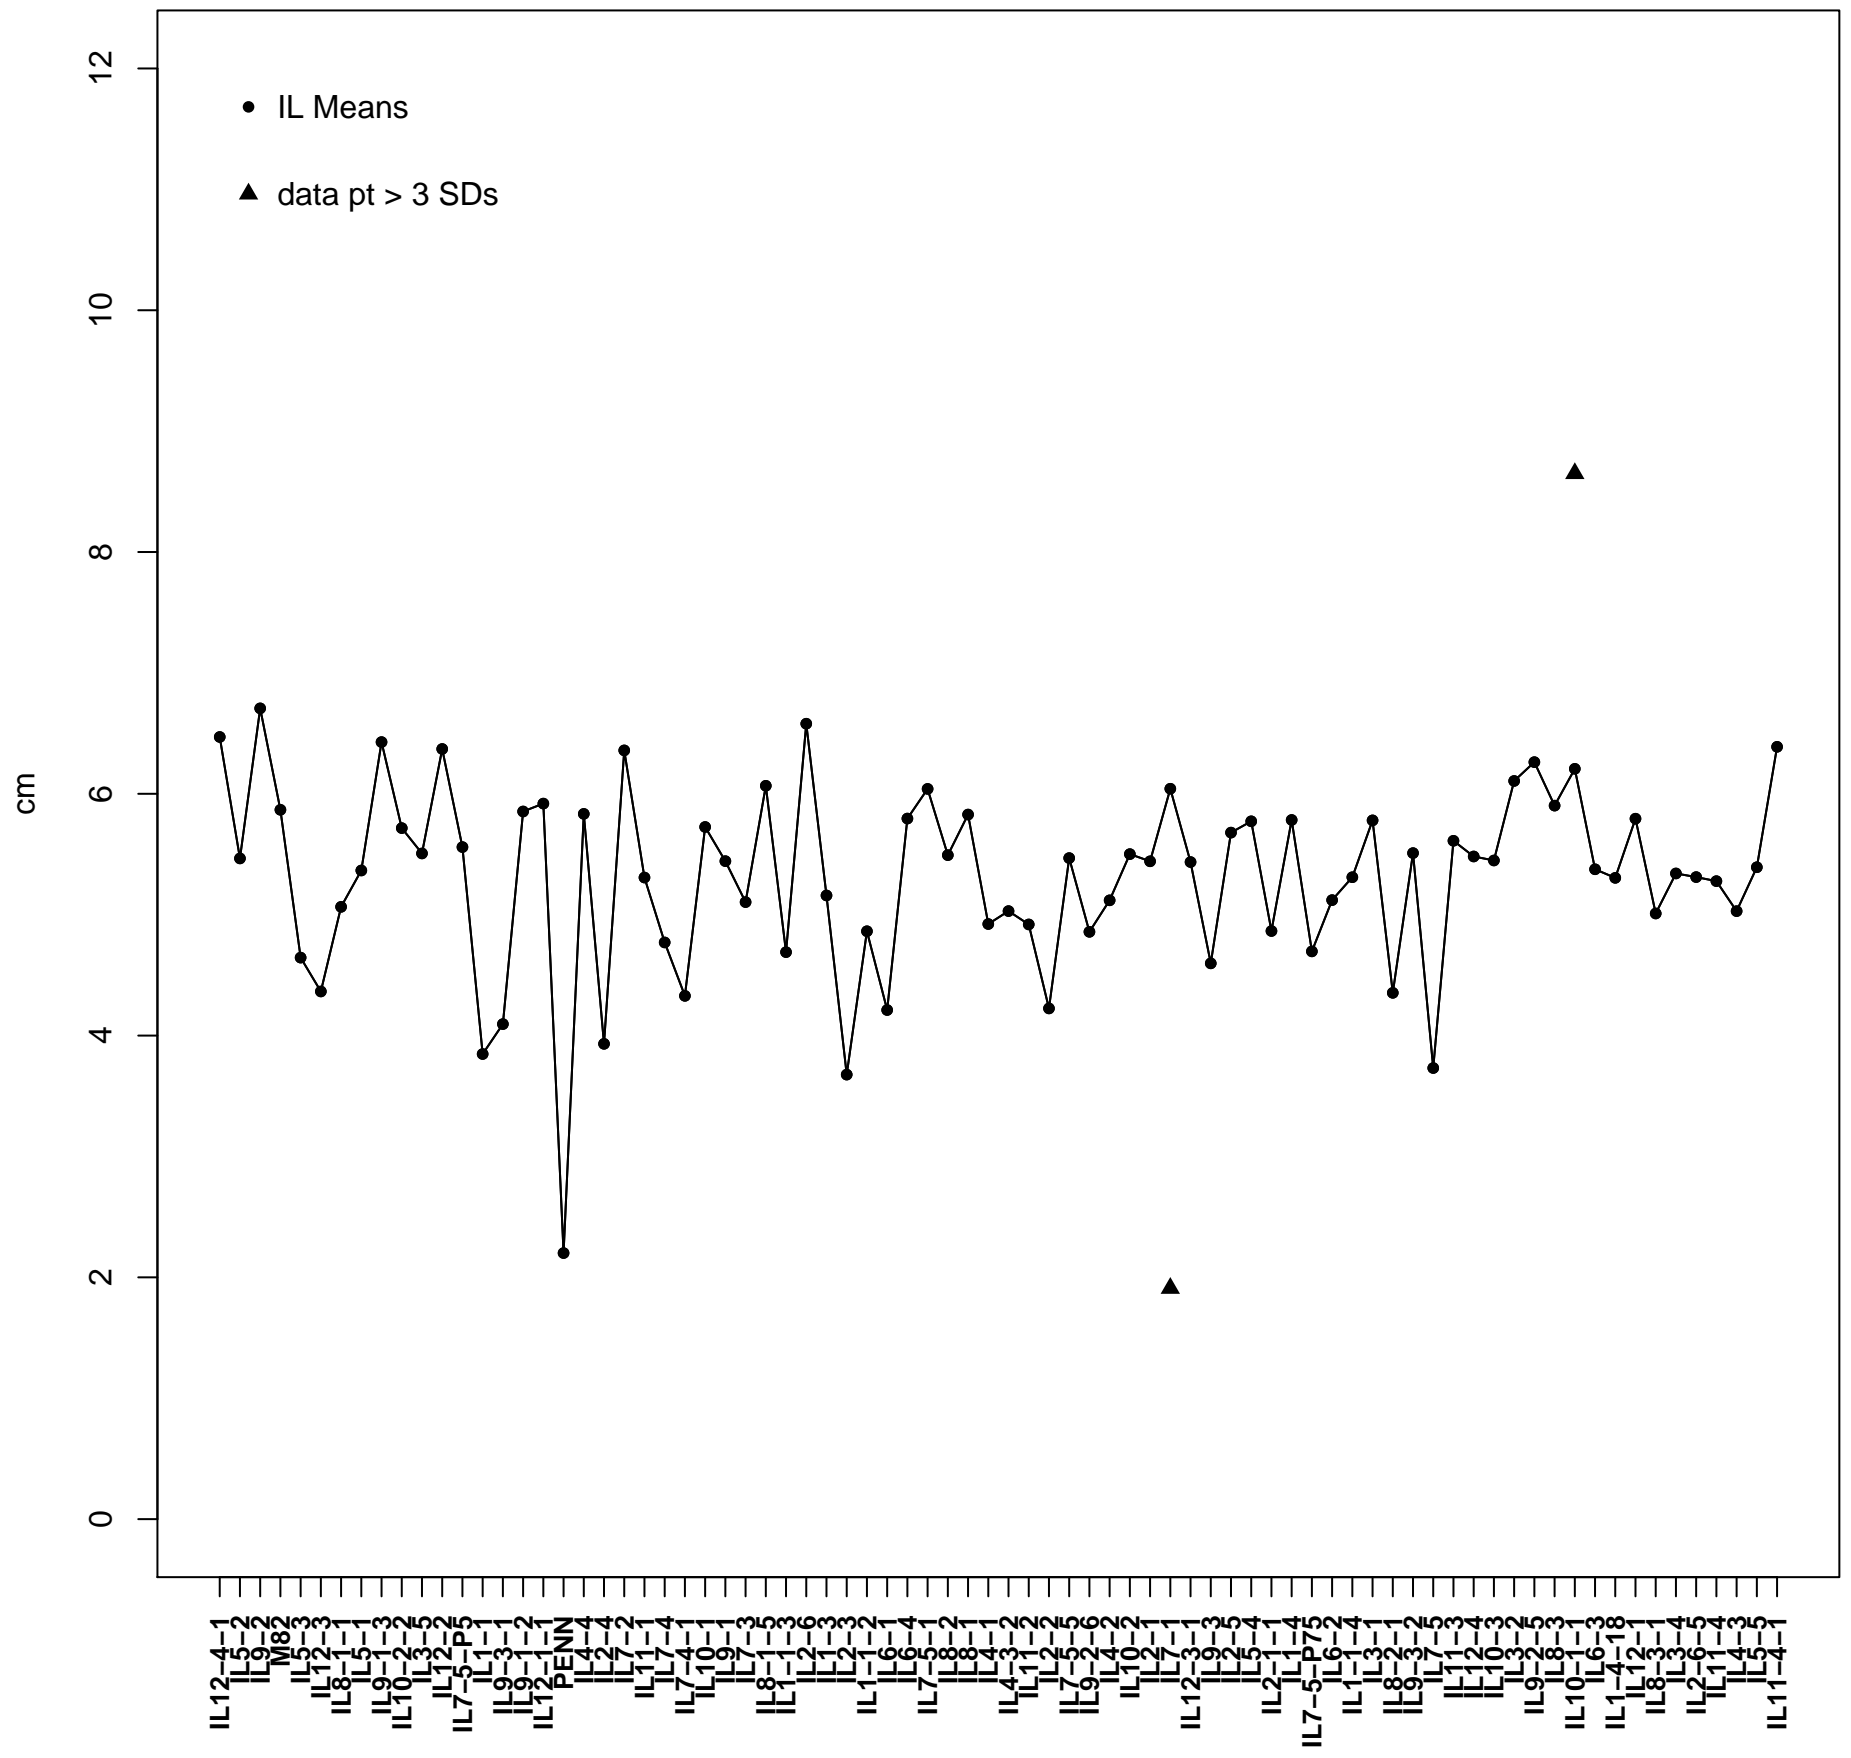

Data for trait tipAng

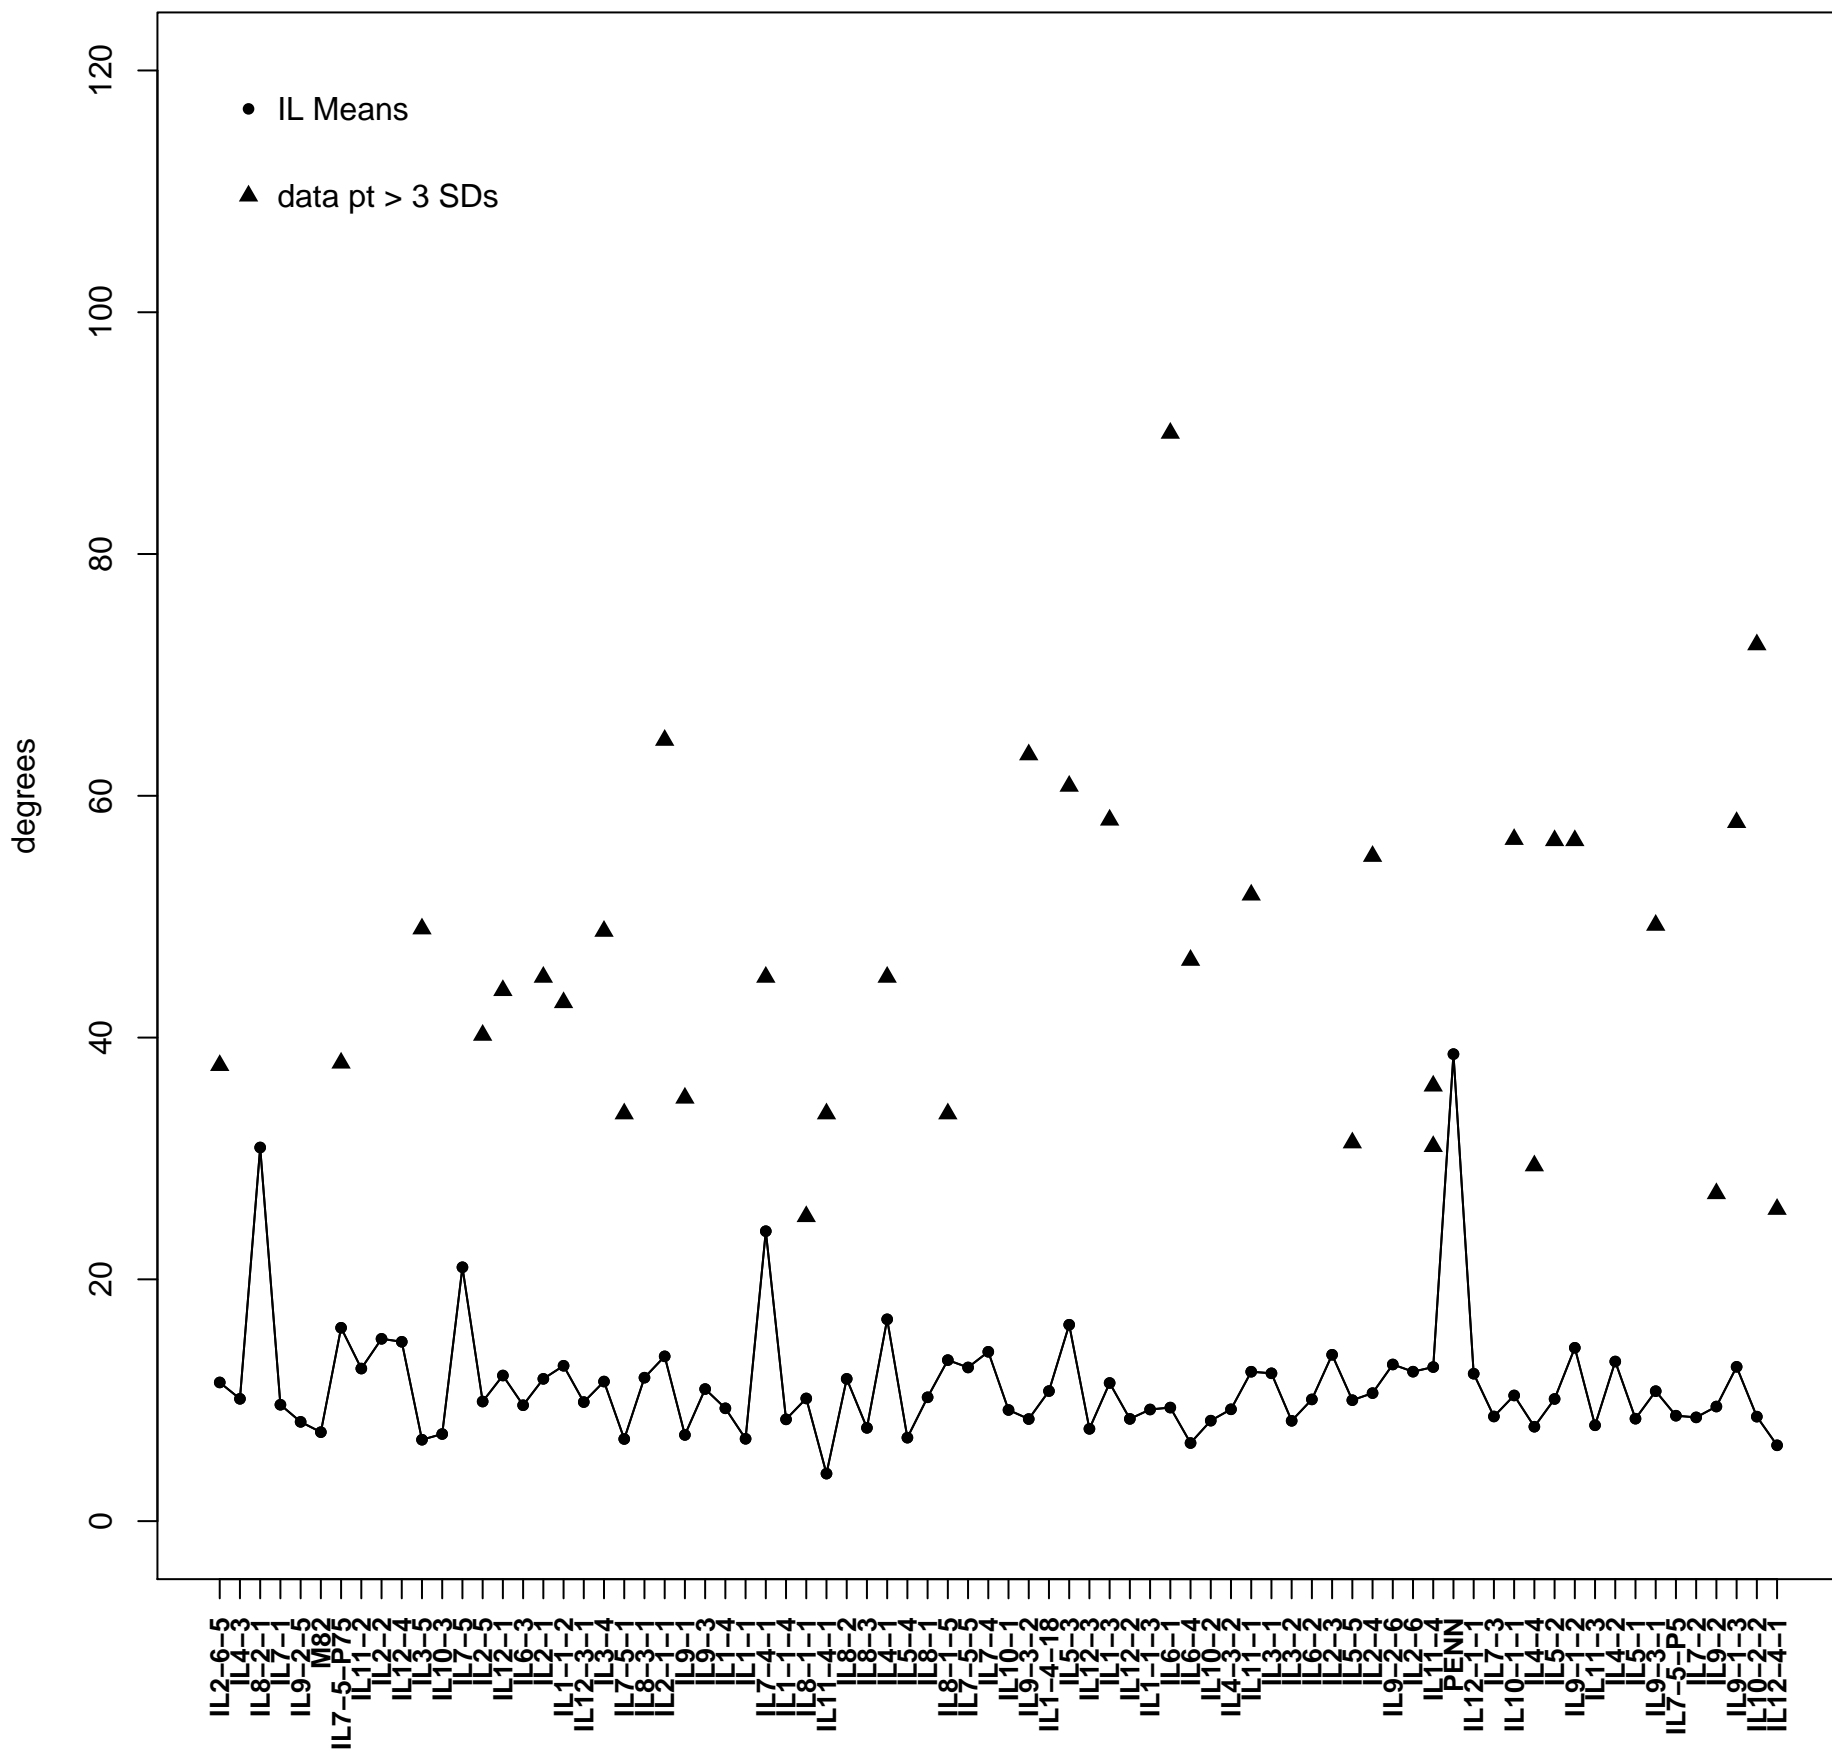

Data for trait avgAbsAng

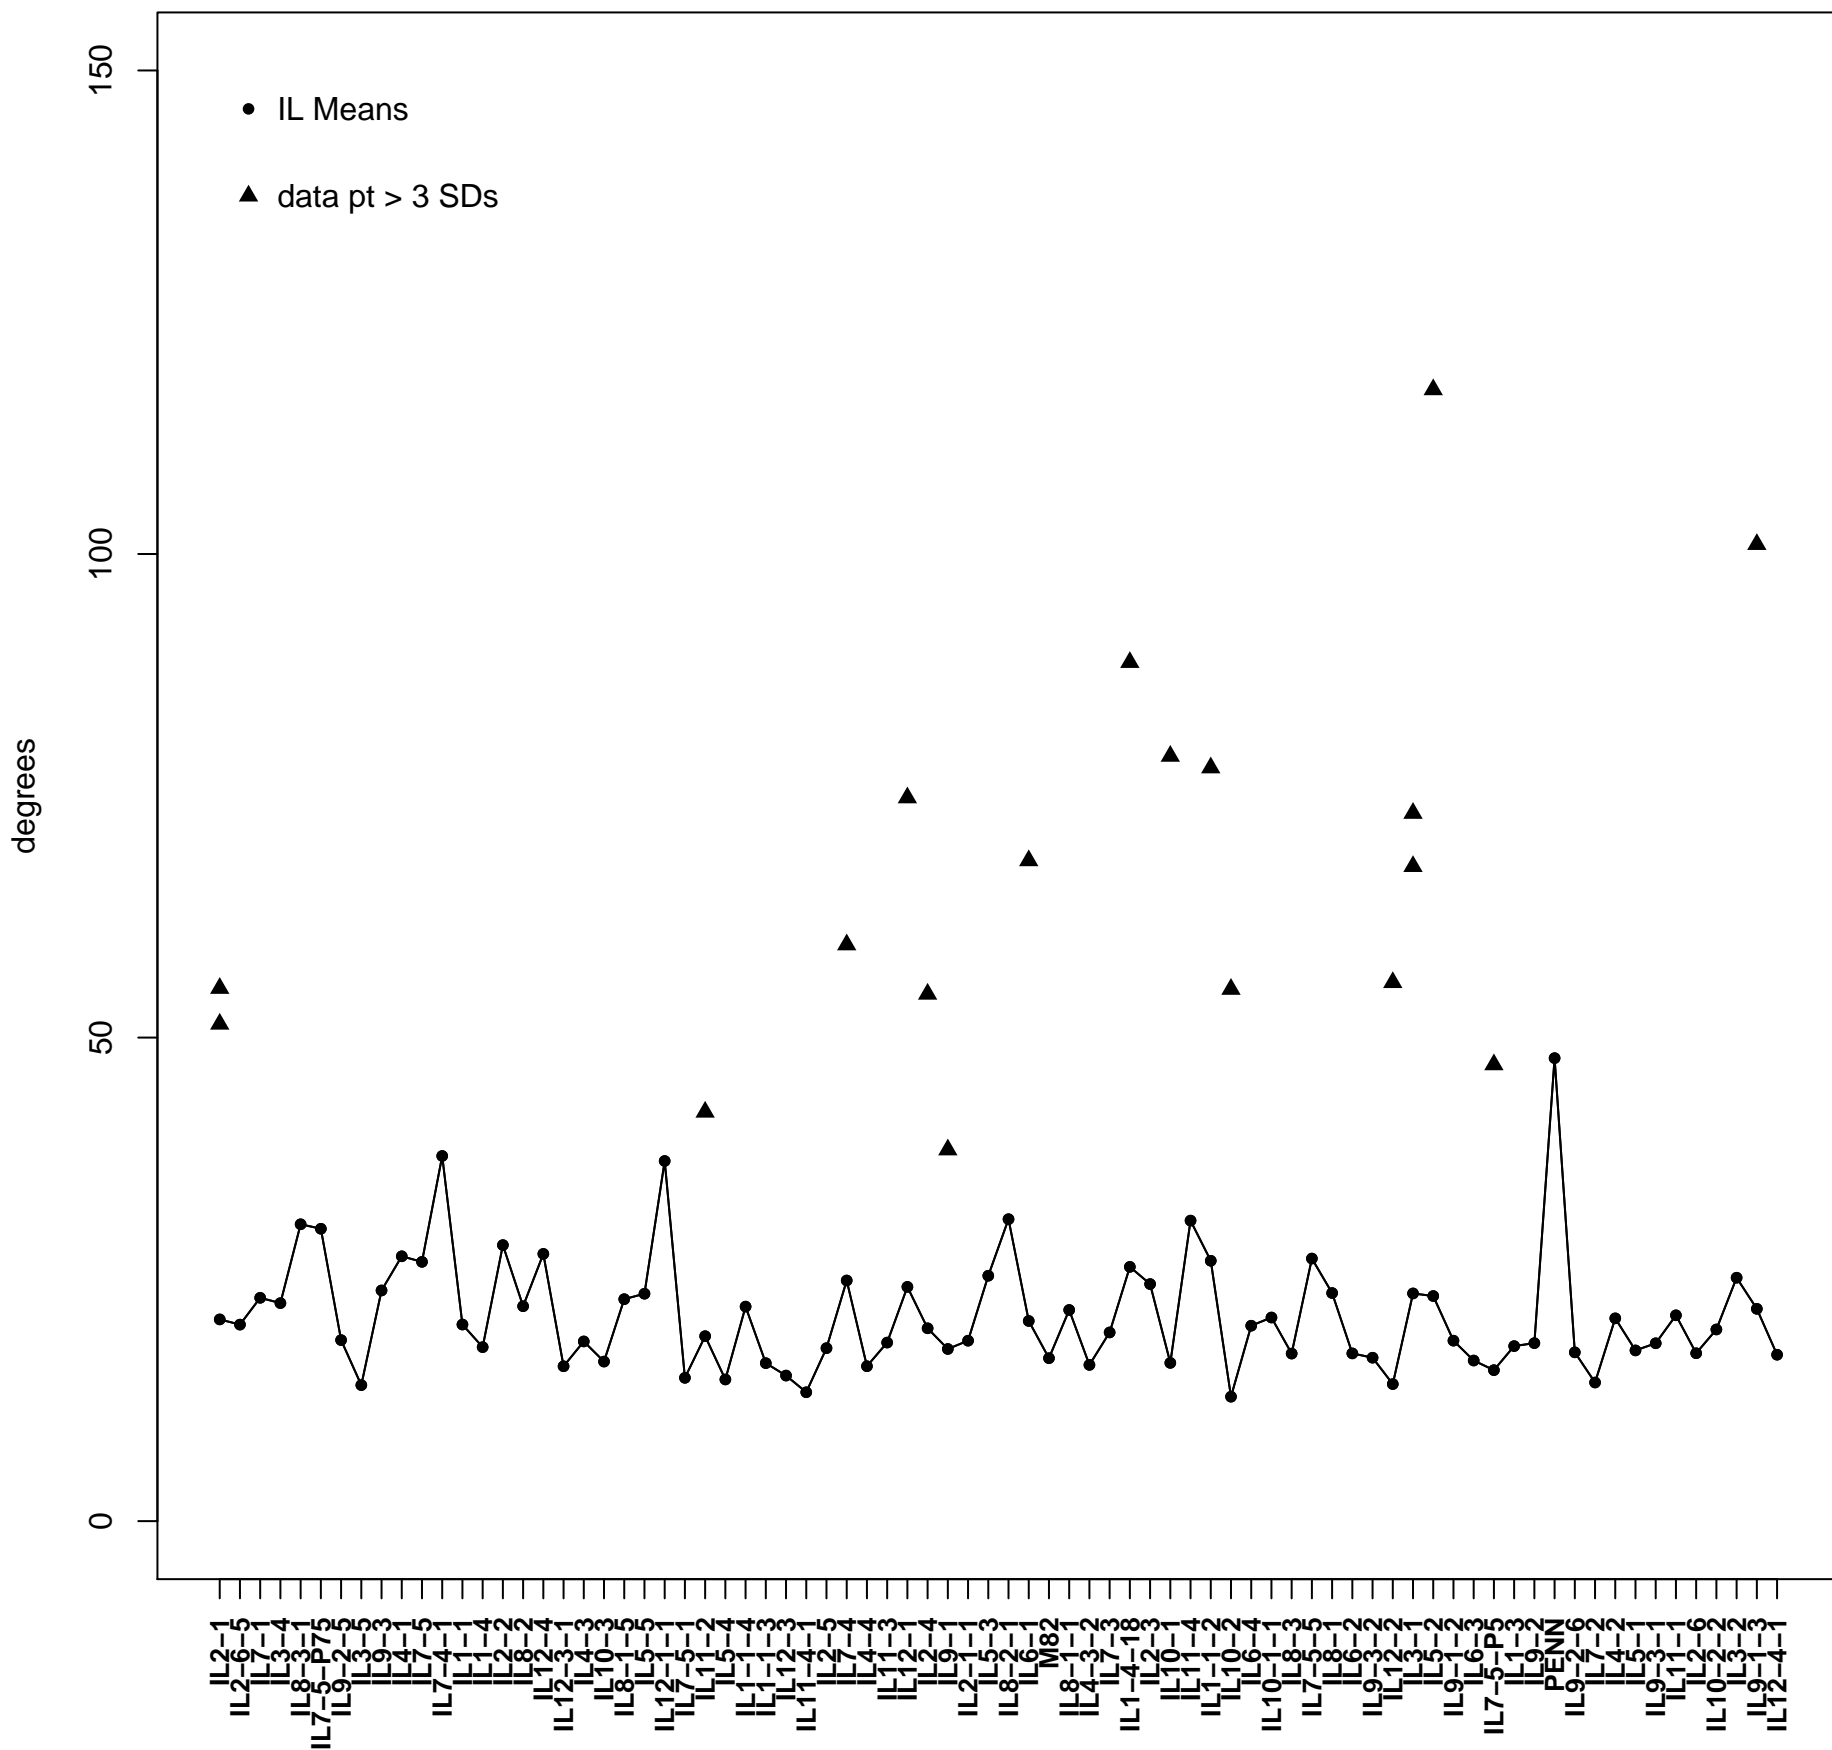

Data for trait first3rdAng

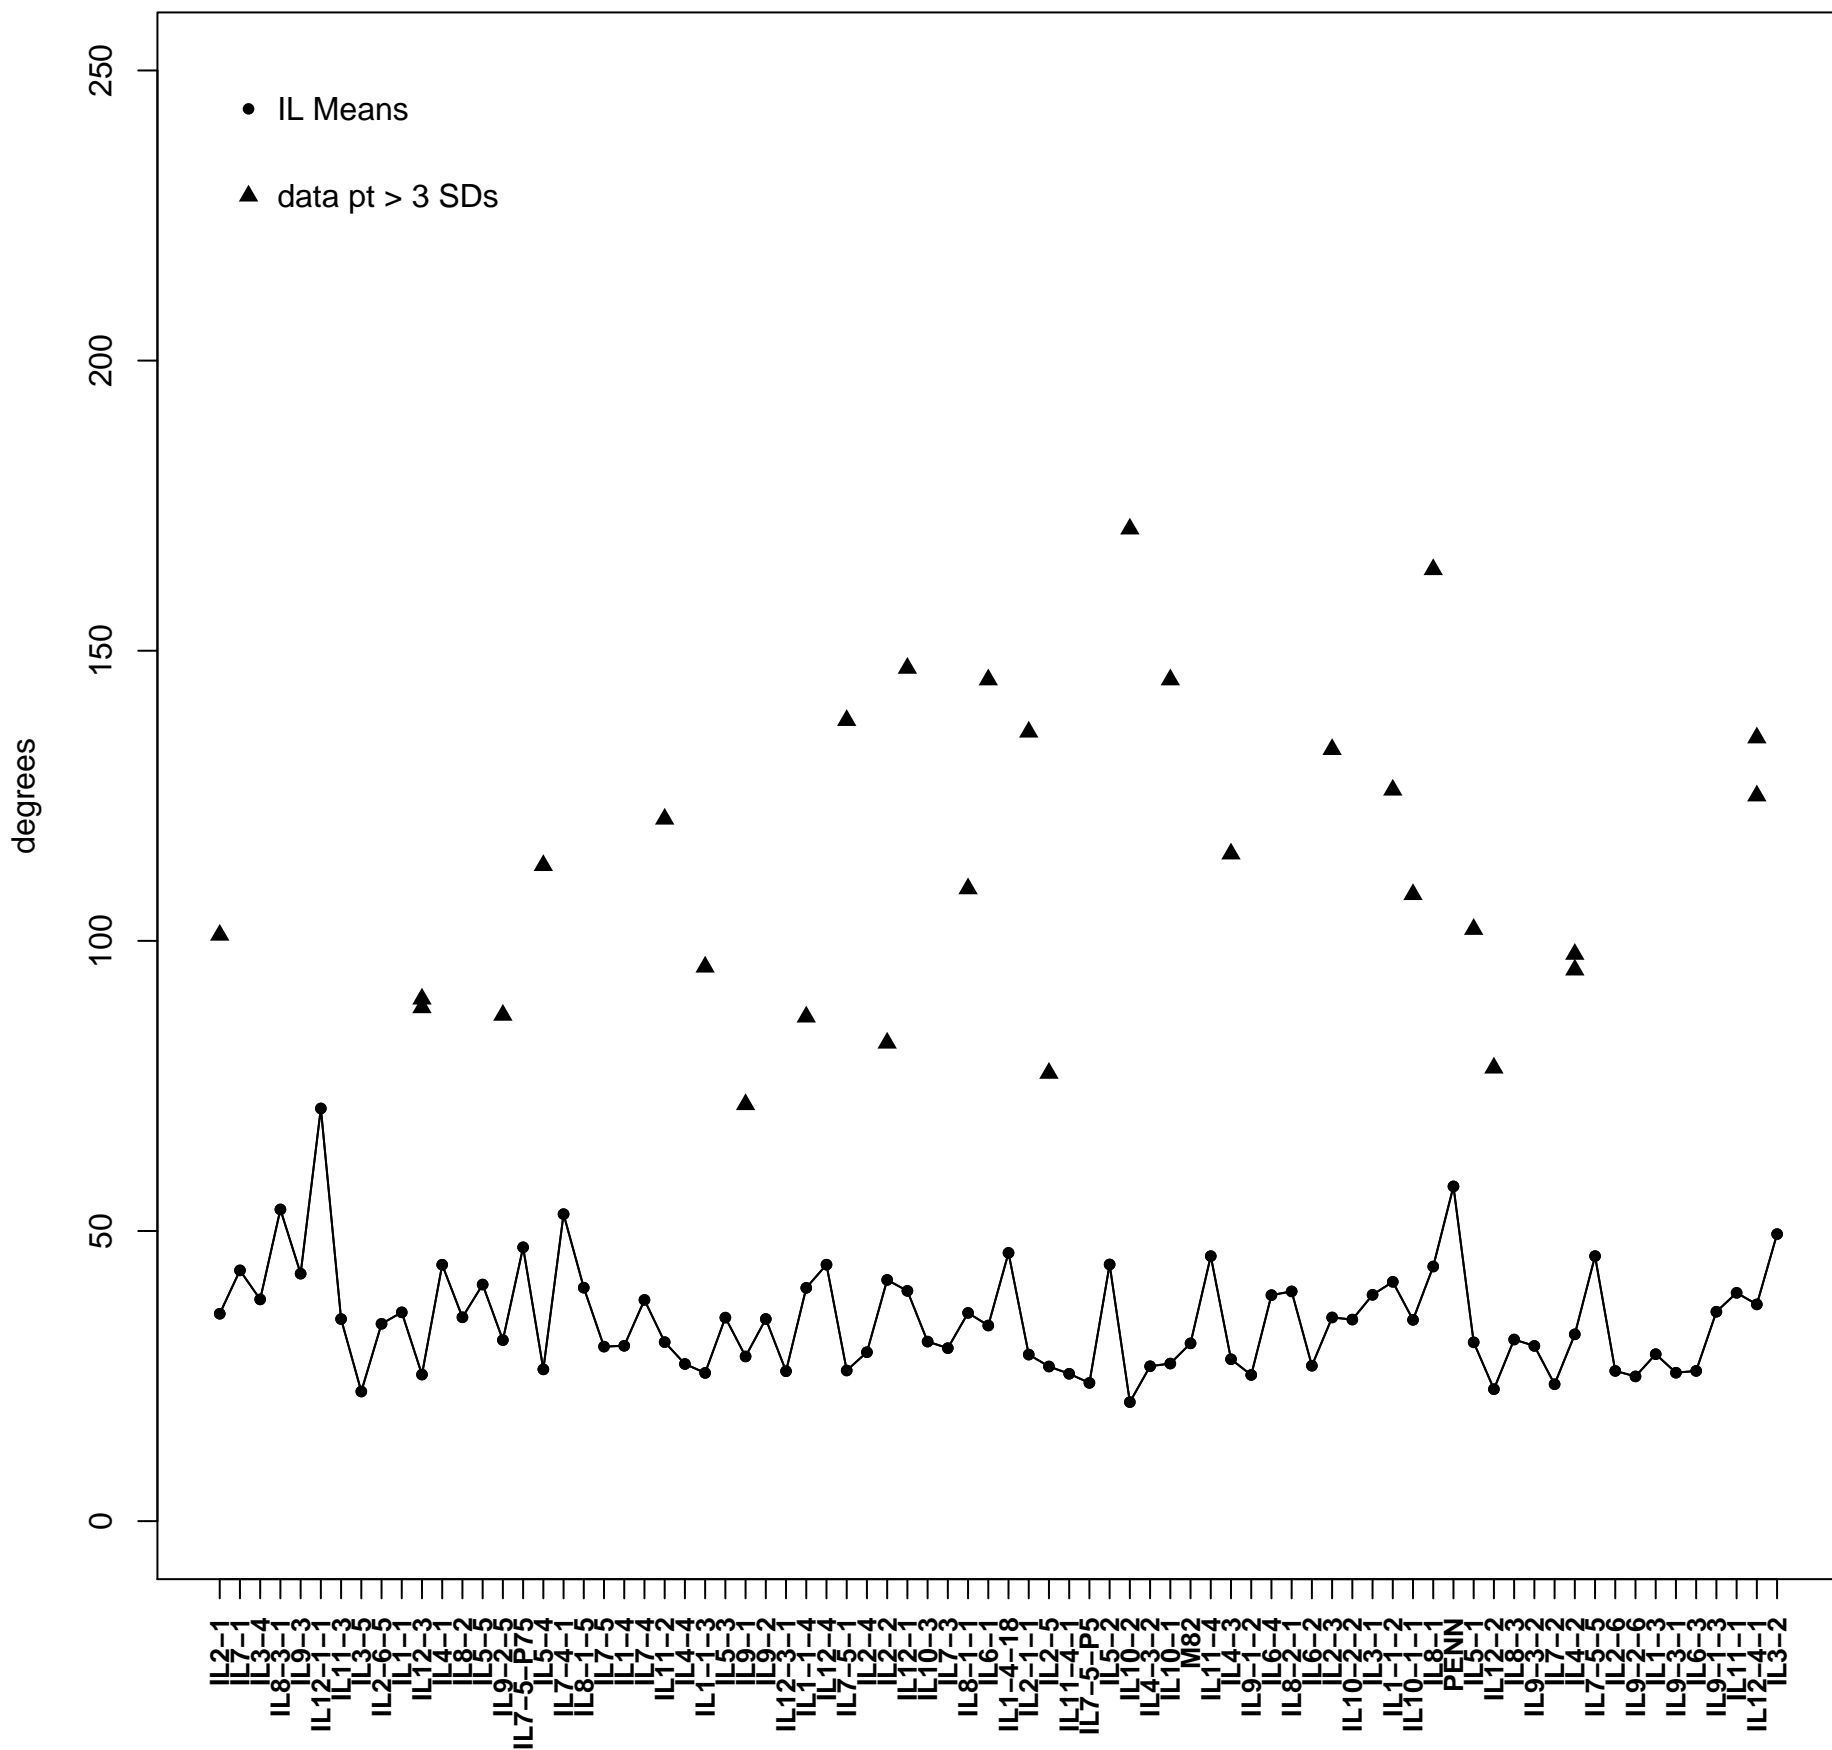

Data for trait mid3rdAng

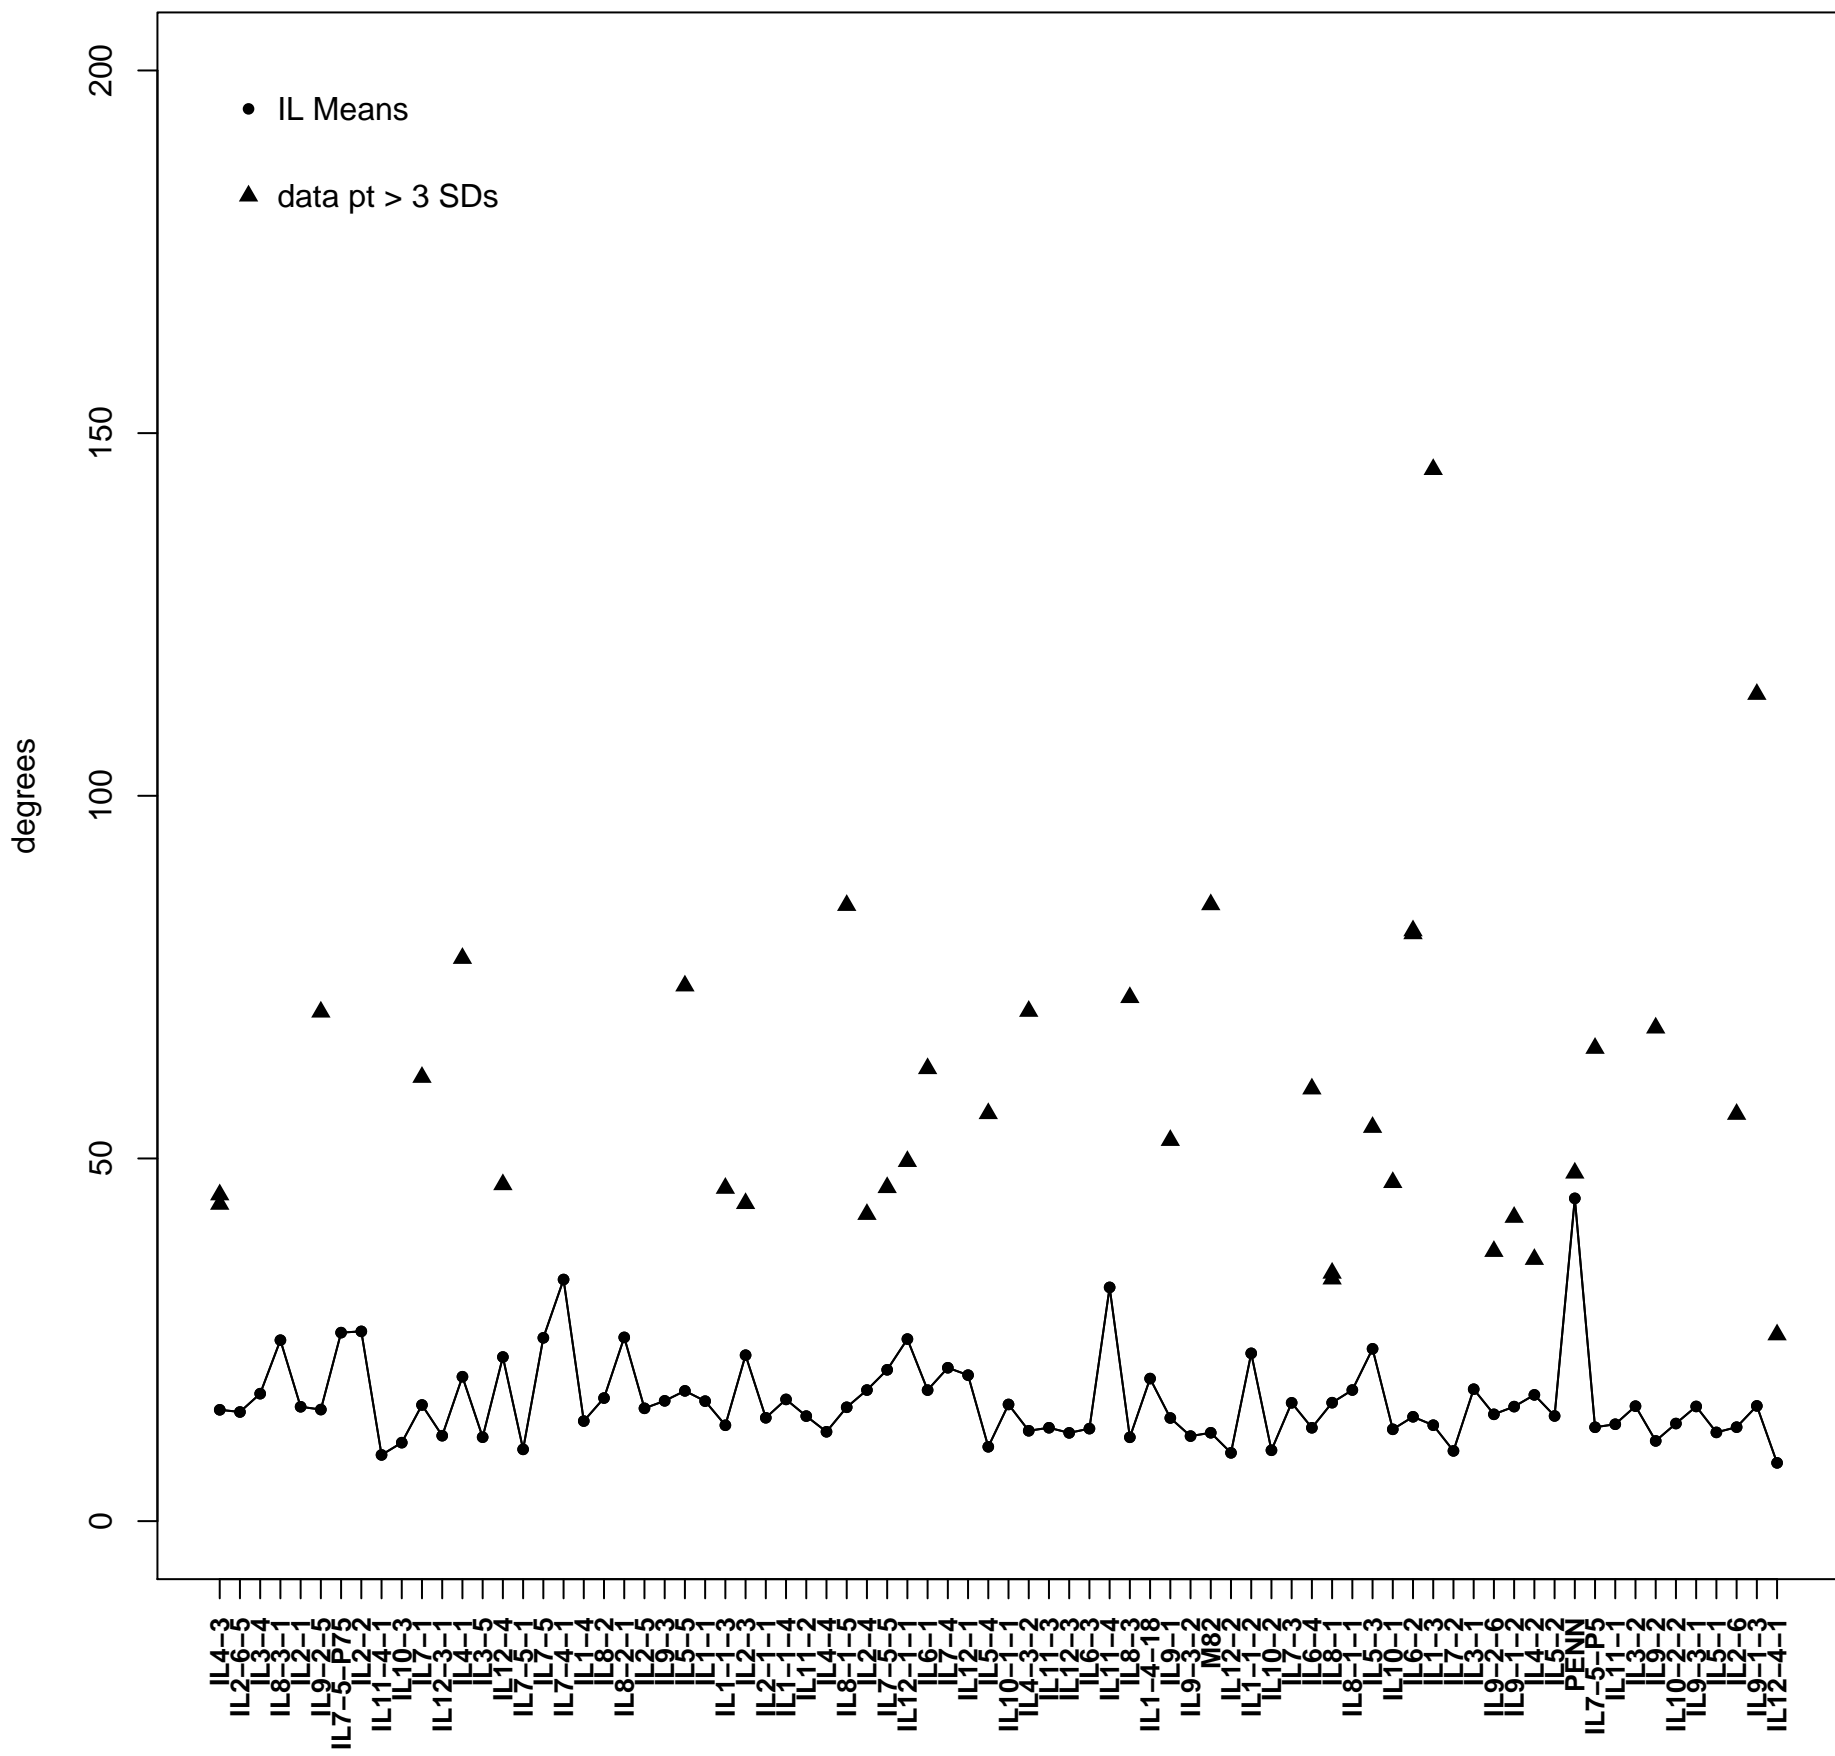

Data for trait last3rdAng

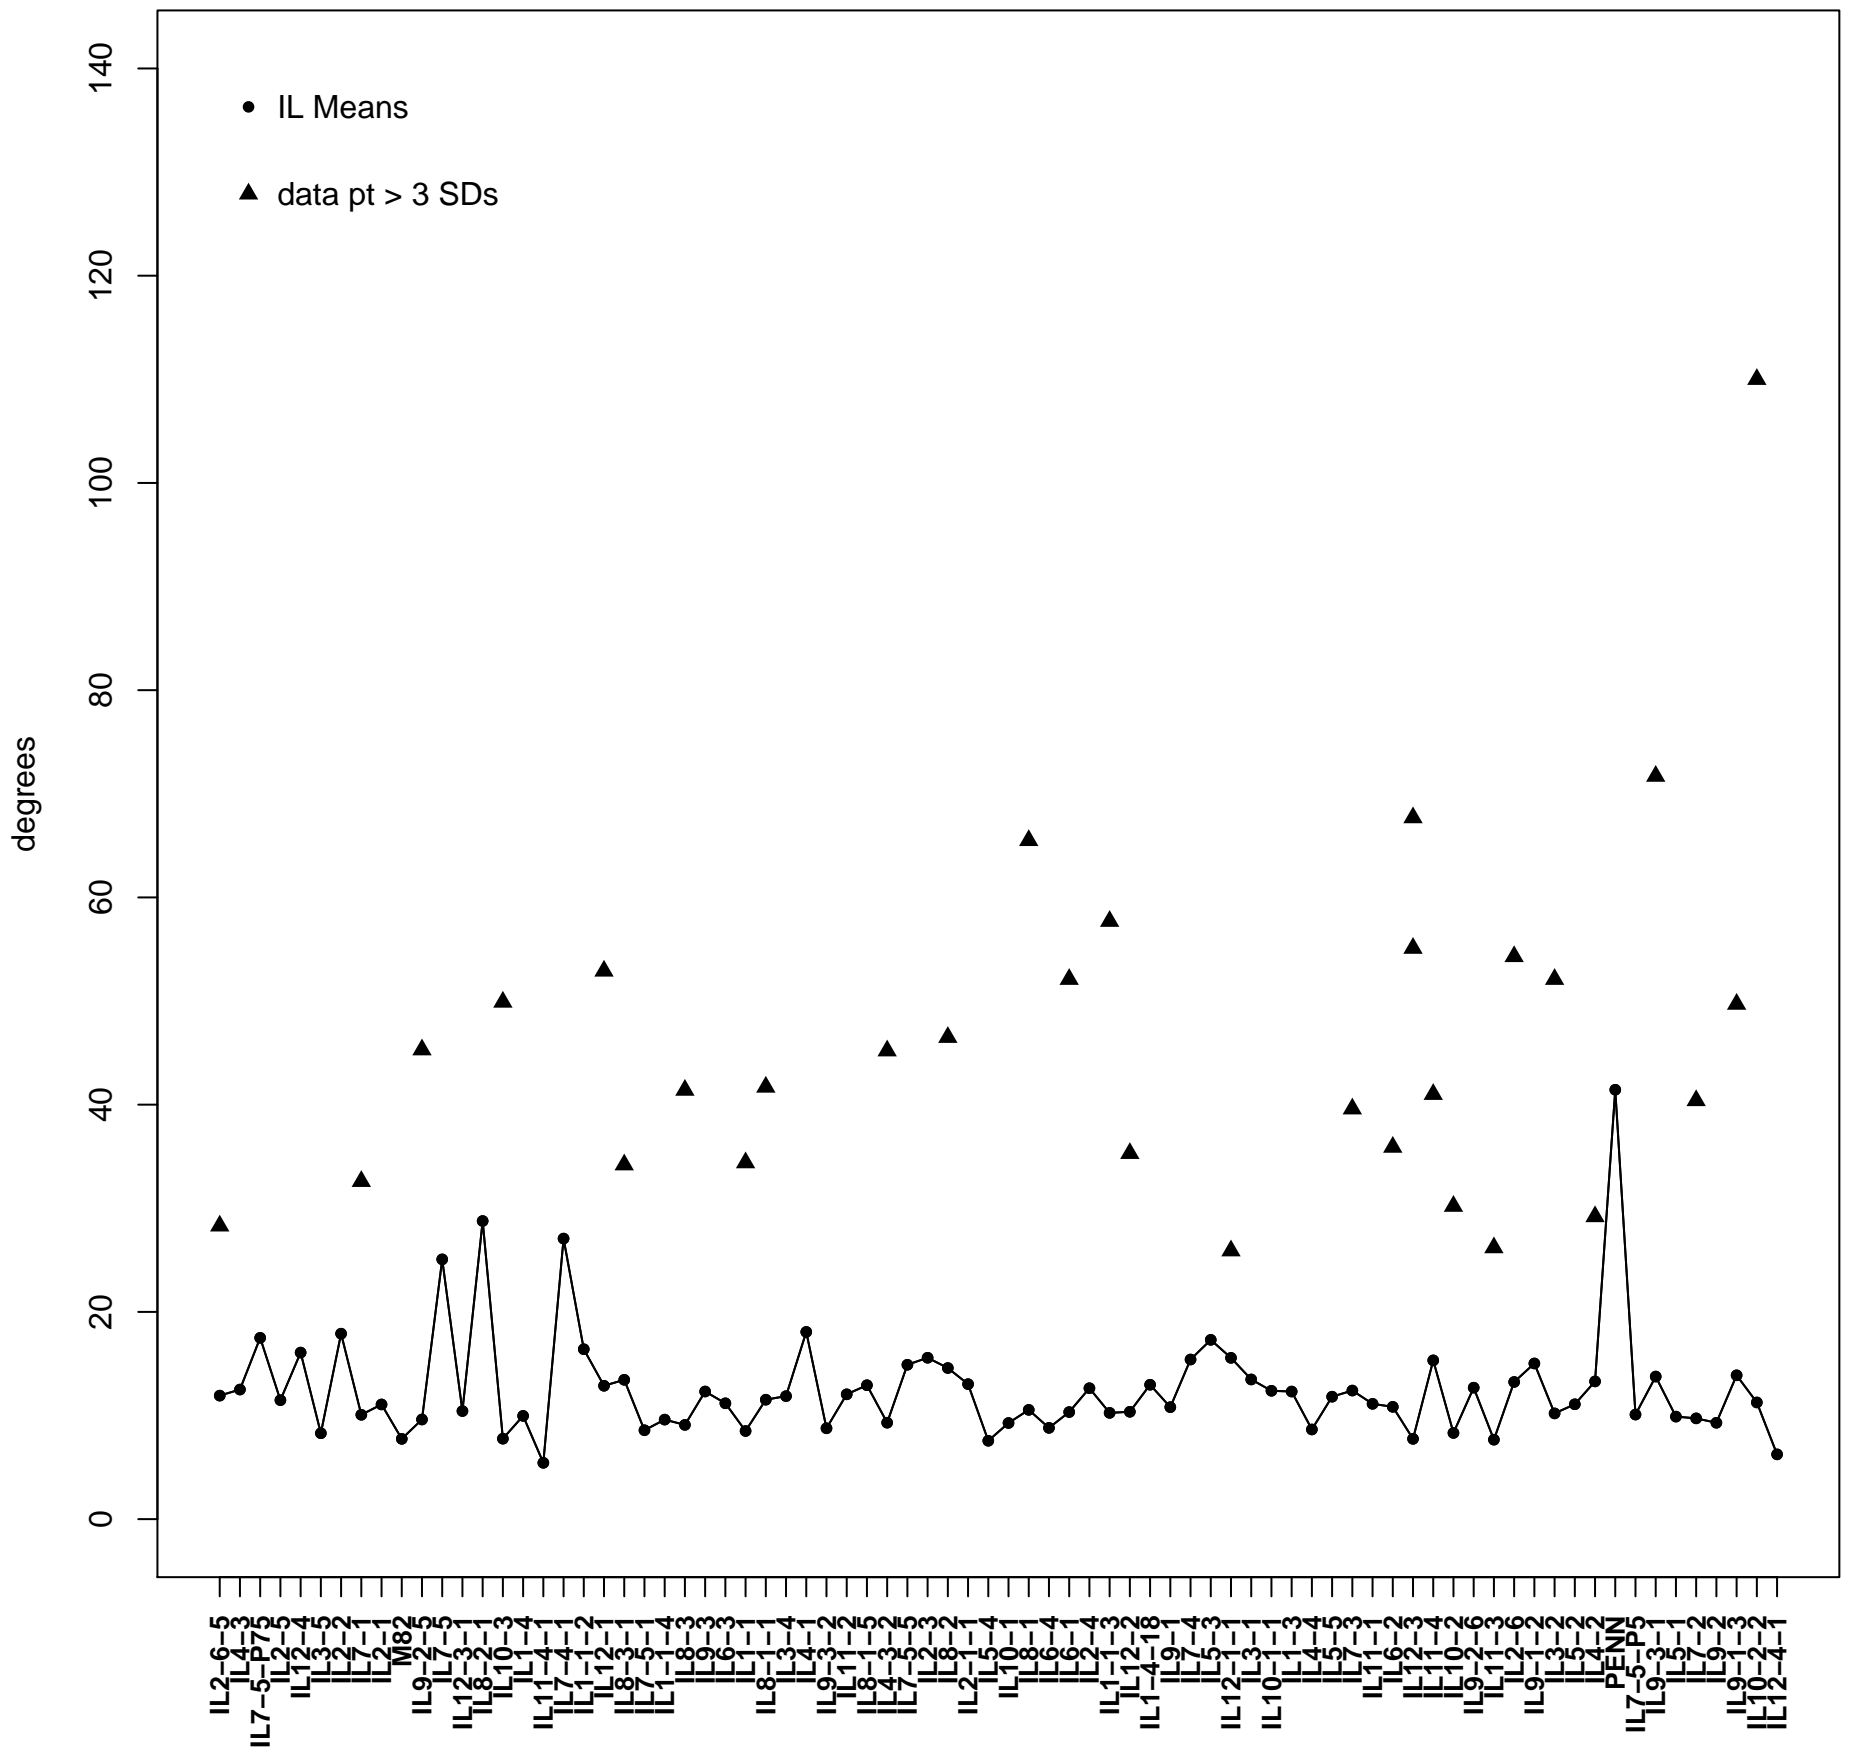

Supplement: Supplementary file 33 [file 2]
