# Supplementary material
Source: publisher figshare collection journal article supplement (https://gsajournals.figshare.com/articles/dataset/_/7237562)

PENN REP2 plate B – Experiment REP2  
nMeasurements/Results\_Penn\_3\_LivingstoneMeasuremenMeasurements/Results\_Penn\_3\_LivingstoneMeasuremenMeasurements/Results\_Penn\_3\_LivingstoneMeasuremenMeasurements/Results\_Penn\_3\_LivingstoneMeasureme

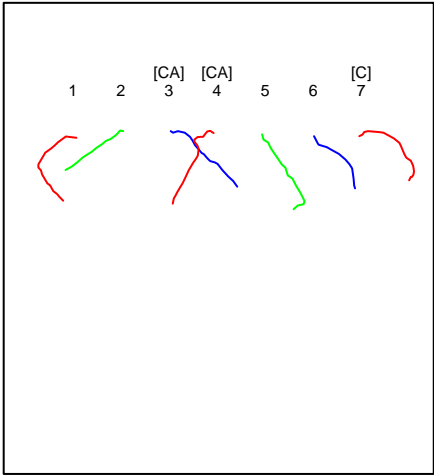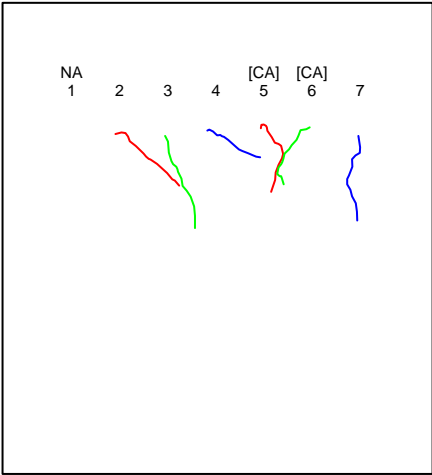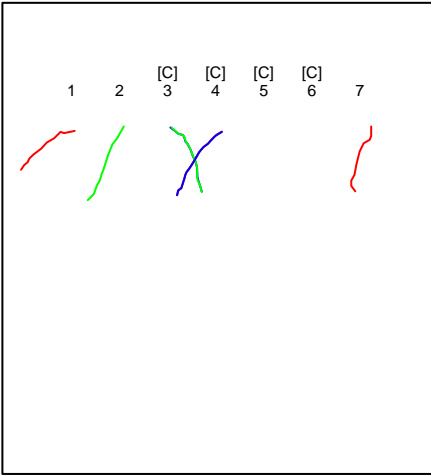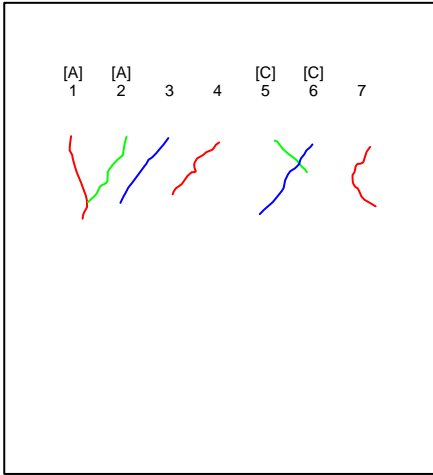

PENN REP3 plate D – Experiment REP3  
nMeasurements/Results\_Penn\_3\_LivingstoneMeasuremenMeasurements/Results\_Penn\_3\_LivingstoneMeasureme

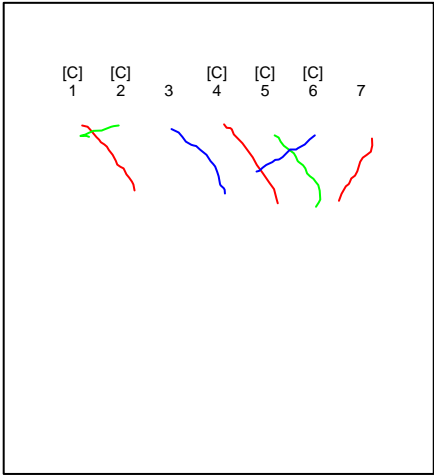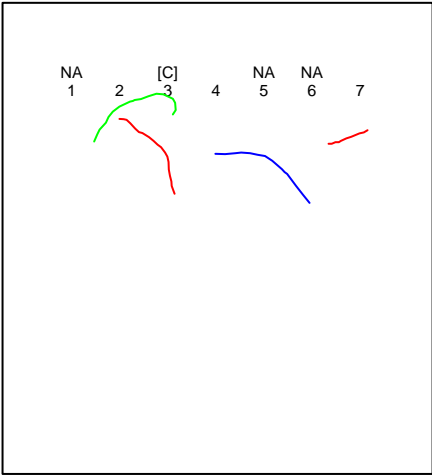

Supplement: Supplementary file 44 [file 2]
